# Supplementary material for: Fibroblast polarization over the myocardial infarction time continuum shifts roles from inflammation to angiogenesis
Source: PubMed Central journal article supplement (PMC6329742; doi:10.1007/s00395-019-0715-4), 2019-01-11
Supplement: 395_2019_715_MOESM1_ESM.pdf [file 395_2019_715_MOESM1_ESM.pdf]

| Online Table 1. FPKM values for each post-MI fibroblast sample. |       |       |       |       |       |       |       |       |       |       |       |       |
|-----------------------------------------------------------------|-------|-------|-------|-------|-------|-------|-------|-------|-------|-------|-------|-------|
|                                                                 | 1     | 2     | 3     | 4     | 5     | 6     | 7     | 8     | 9     | 10    | 11    | 12    |
| gene                                                            | A D0  | A D0  | A D0  | B D1  | B D1  | B D1  | C D3  | C D3  | C D3  | D D7  | D D7  | D D7  |
| 42430                                                           | 0.1   | 0.0   | 0.1   | 1.0   | 1.2   | 0.0   | 0.1   | 0.1   | 0.0   | 0.1   | 0.1   | 0.1   |
| 42431                                                           | 44.6  | 35.3  | 27.7  | 43.1  | 31.3  | 43.0  | 30.4  | 26.4  | 28.8  | 33.0  | 34.1  | 32.3  |
| 42432                                                           | 10.1  | 10.6  | 11.1  | 7.9   | 13.1  | 7.2   | 13.2  | 11.6  | 12.0  | 8.7   | 8.4   | 10.8  |
| 42434                                                           | 32.3  | 26.1  | 27.6  | 26.7  | 24.7  | 25.4  | 24.5  | 25.8  | 27.5  | 29.8  | 26.6  | 25.1  |
| 42435                                                           | 6.4   | 7.4   | 6.7   | 6.5   | 7.0   | 6.3   | 6.5   | 6.6   | 6.8   | 7.7   | 6.8   | 7.0   |
| 42436                                                           | 17.7  | 17.3  | 18.9  | 16.3  | 17.1  | 16.9  | 16.4  | 17.8  | 17.6  | 18.0  | 18.9  | 18.9  |
| 42437                                                           | 25.4  | 20.6  | 18.3  | 23.6  | 20.6  | 23.7  | 19.1  | 19.4  | 21.8  | 20.6  | 21.4  | 22.6  |
| 42438                                                           | 1.7   | 1.6   | 1.4   | 1.7   | 1.2   | 2.9   | 0.8   | 0.8   | 0.8   | 1.4   | 0.9   | 0.9   |
| 42440                                                           | 0.0   | 0.0   | 0.0   | 0.0   | 0.1   | 0.0   | 0.1   | 0.0   | 0.0   | 0.1   | 0.0   | 0.0   |
| 42614                                                           | 0.4   | 0.2   | 0.3   | 0.3   | 0.3   | 0.7   | 0.2   | 0.6   | 0.3   | 0.1   | 0.3   | 0.3   |
| 42615                                                           | 126.1 | 124.0 | 117.0 | 141.7 | 119.5 | 131.4 | 118.9 | 127.3 | 124.0 | 114.3 | 139.3 | 130.3 |
| 42616                                                           | 0.4   | 0.2   | 0.1   | 0.4   | 0.1   | 0.6   | 0.1   | 0.1   | 0.1   | 0.1   | 0.1   | 0.1   |
| 42617                                                           | 1.0   | 2.6   | 2.6   | 1.3   | 1.3   | 0.5   | 0.5   | 1.0   | 1.0   | 1.2   | 0.8   | 1.1   |
| 42618                                                           | 18.9  | 22.9  | 22.6  | 14.7  | 16.8  | 20.1  | 27.5  | 32.8  | 27.6  | 13.5  | 24.2  | 19.4  |
| 42619                                                           | 1.3   | 1.7   | 2.3   | 1.1   | 1.4   | 1.5   | 1.6   | 2.6   | 1.7   | 1.5   | 1.8   | 1.3   |
| 42620                                                           | 125.0 | 127.3 | 151.2 | 152.4 | 122.0 | 118.7 | 140.0 | 142.7 | 139.0 | 123.3 | 157.3 | 173.2 |
| 42621                                                           | 57.7  | 64.9  | 66.8  | 63.6  | 57.2  | 62.1  | 77.6  | 89.8  | 79.9  | 45.5  | 65.8  | 66.6  |
| 42622                                                           | 22.5  | 20.1  | 15.1  | 27.8  | 24.6  | 23.5  | 27.8  | 17.6  | 23.7  | 28.8  | 26.7  | 25.9  |
| 42623                                                           | 19.9  | 21.2  | 20.9  | 15.9  | 17.7  | 17.0  | 19.0  | 18.0  | 16.8  | 15.6  | 19.1  | 19.5  |
| 42624                                                           | 72.1  | 91.6  | 107.3 | 84.9  | 82.3  | 79.1  | 116.4 | 114.9 | 110.0 | 70.2  | 108.7 | 108.4 |
| 42627                                                           | 0.1   | 0.1   | 0.2   | 0.1   | 0.0   | 0.0   | 0.0   | 0.0   | 0.0   | 0.0   | 0.0   | 0.0   |
| 42628                                                           | 244.6 | 180.8 | 151.8 | 253.7 | 190.6 | 261.4 | 185.2 | 190.1 | 186.8 | 218.8 | 232.0 | 221.6 |
| 0610005C13Rik                                                   | 0.1   | 0.0   | 0.0   | 0.0   | 0.1   | 0.2   | 0.1   | 0.1   | 0.2   | 0.0   | 0.1   | 0.2   |
| 0610007N19Rik                                                   | 21.5  | 15.3  | 16.6  | 17.8  | 13.2  | 23.4  | 17.0  | 20.3  | 16.2  | 22.3  | 19.0  | 19.6  |
| 0610007P14Rik                                                   | 13.4  | 16.7  | 21.6  | 9.0   | 13.4  | 13.7  | 25.1  | 29.3  | 20.2  | 11.5  | 21.8  | 13.9  |
| 0610009B22Rik                                                   | 26.7  | 25.4  | 24.2  | 21.3  | 20.3  | 26.9  | 19.0  | 21.8  | 25.0  | 26.6  | 22.4  | 24.5  |
| 0610009D07Rik                                                   | 35.5  | 32.7  | 31.4  | 39.3  | 32.4  | 37.2  | 30.1  | 33.5  | 29.9  | 32.9  | 34.7  | 35.9  |
| 0610009L18Rik                                                   | 1.8   | 1.6   | 2.0   | 1.8   | 2.3   | 1.8   | 1.6   | 1.7   | 2.0   | 3.1   | 2.0   | 1.8   |
| 0610009O20Rik                                                   | 8.6   | 7.5   | 7.2   | 9.4   | 7.1   | 7.6   | 10.6  | 7.8   | 8.1   | 7.8   | 8.8   | 7.2   |
| 0610010B08Rik                                                   | 4.2   | 3.9   | 3.1   | 3.3   | 3.3   | 4.9   | 3.0   | 3.2   | 3.5   | 4.8   | 3.7   | 4.6   |
| 0610010F05Rik                                                   | 10.9  | 8.7   | 7.6   | 12.4  | 8.9   | 10.1  | 8.3   | 6.5   | 8.1   | 8.5   | 10.8  | 9.3   |
| 0610010K14Rik                                                   | 9.3   | 10.0  | 9.8   | 11.2  | 9.0   | 12.9  | 12.0  | 14.8  | 12.3  | 9.2   | 9.1   | 10.9  |
| 0610011F06Rik                                                   | 11.6  | 12.9  | 9.6   | 9.6   | 9.2   | 19.9  | 9.2   | 8.0   | 8.6   | 13.3  | 10.0  | 9.3   |
| 0610012G03Rik                                                   | 11.0  | 8.5   | 7.0   | 9.7   | 10.0  | 11.8  | 8.2   | 9.1   | 9.5   | 12.2  | 10.3  | 9.9   |
| 0610012H03Rik                                                   | 0.0   | 0.0   | 0.1   | 0.0   | 0.0   | 0.0   | 0.0   | 0.0   | 0.0   | 0.0   | 0.0   | 0.0   |
| 0610030E20Rik                                                   | 1.9   | 2.6   | 2.6   | 2.1   | 2.1   | 2.2   | 2.0   | 2.4   | 2.3   | 1.8   | 2.0   | 2.2   |
| 0610031J06Rik                                                   | 73.2  | 61.9  | 56.2  | 92.4  | 81.4  | 86.1  | 58.4  | 55.4  | 53.1  | 69.0  | 59.3  | 63.2  |
| 0610037L13Rik                                                   | 13.3  | 12.8  | 11.1  | 15.4  | 11.9  | 12.9  | 12.3  | 13.6  | 13.0  | 12.1  | 14.9  | 14.3  |
| 0610038B21Rik                                                   | 1.3   | 1.2   | 0.8   | 1.3   | 1.0   | 1.2   | 1.1   | 1.0   | 0.7   | 1.0   | 1.2   | 0.5   |
| 0610038L08Rik                                                   | 0.0   | 0.2   | 0.0   | 0.0   | 0.0   | 0.4   | 0.1   | 0.1   | 0.0   | 0.0   | 0.0   | 0.0   |
| 0610039K10Rik                                                   | 1.9   | 1.7   | 1.2   | 2.1   | 1.8   | 1.3   | 1.9   | 1.8   | 1.6   | 1.9   | 1.2   | 1.4   |
| 0610040B10Rik                                                   | 2.3   | 1.8   | 2.4   | 1.5   | 1.7   | 2.3   | 1.0   | 1.1   | 2.8   | 1.9   | 2.1   | 2.1   |
| 0610040F04Rik                                                   | 0.0   | 0.0   | 0.0   | 0.0   | 0.1   | 0.0   | 0.0   | 0.1   | 0.0   | 0.1   | 0.0   | 0.0   |
| 0610043K17Rik                                                   | 0.1   | 0.1   | 0.5   | 0.4   | 0.1   | 0.3   | 0.1   | 0.0   | 0.0   | 0.2   | 0.1   | 0.4   |
| 1100001G20Rik                                                   | 0.0   | 0.1   | 0.6   | 0.0   | 0.7   | 0.0   | 0.4   | 0.6   | 0.1   | 0.3   | 0.2   | 0.1   |
| 1110001A16Rik                                                   | 9.1   | 7.0   | 8.9   | 10.7  | 7.5   | 11.8  | 8.0   | 7.8   | 6.7   | 8.4   | 9.1   | 9.5   |
| 1110001J03Rik                                                   | 5.2   | 3.6   | 4.0   | 3.3   | 3.3   | 3.7   | 2.7   | 5.8   | 4.4   | 7.2   | 3.4   | 4.4   |
| 1110002L01Rik                                                   | 8.5   | 7.3   | 5.9   | 7.8   | 7.0   | 7.3   | 6.5   | 6.1   | 5.5   | 7.2   | 8.0   | 7.1   |
| 1110004E09Rik                                                   | 11.3  | 8.4   | 7.7   | 9.8   | 7.3   | 9.4   | 7.5   | 6.3   | 6.9   | 6.9   | 7.5   | 8.7   |
| 1110004F10Rik                                                   | 42.8  | 41.9  | 47.4  | 49.5  | 40.2  | 45.1  | 48.3  | 44.1  | 44.6  | 46.0  | 48.7  | 47.9  |
| 1110006O24Rik                                                   | 0.4   | 0.4   | 0.3   | 0.4   | 0.8   | 0.5   | 0.3   | 0.3   | 0.4   | 0.5   | 0.5   | 0.3   |
| 1110007C09Rik                                                   | 74.9  | 58.3  | 49.1  | 74.4  | 63.7  | 57.3  | 73.1  | 66.4  | 52.2  | 61.1  | 86.2  | 61.0  |
| 1110008F13Rik                                                   | 36.3  | 26.8  | 26.7  | 32.9  | 31.6  | 23.7  | 33.4  | 31.3  | 30.7  | 39.2  | 32.3  | 33.0  |
| 1110008J03Rik                                                   | 2.6   | 2.5   | 2.7   | 2.2   | 2.4   | 3.2   | 2.4   | 3.2   | 2.2   | 2.6   | 3.3   | 2.2   |

Online Table 1

|               |      |      |      |      |      |      |      |      |      |      |      |      |
|---------------|------|------|------|------|------|------|------|------|------|------|------|------|
| 1110008L16Rik | 4.5  | 4.3  | 3.9  | 4.4  | 3.3  | 3.6  | 3.0  | 3.7  | 3.2  | 3.7  | 3.6  | 3.6  |
| 1110008P14Rik | 18.6 | 13.1 | 15.9 | 21.6 | 15.0 | 17.3 | 11.2 | 15.2 | 10.0 | 13.7 | 12.4 | 9.7  |
| 1110012L19Rik | 27.5 | 25.2 | 23.6 | 23.8 | 18.8 | 26.0 | 21.1 | 21.7 | 17.8 | 26.0 | 24.3 | 25.3 |
| 1110017D15Rik | 0.2  | 0.1  | 0.0  | 0.0  | 0.1  | 0.1  | 0.1  | 0.1  | 0.2  | 0.1  | 0.6  | 0.1  |
| 1110018G07Rik | 10.1 | 9.5  | 9.0  | 11.0 | 10.3 | 10.3 | 9.8  | 10.5 | 10.7 | 10.9 | 9.7  | 10.1 |
| 1110019D14Rik | 6.4  | 5.4  | 5.0  | 6.2  | 5.2  | 5.4  | 4.4  | 4.3  | 4.3  | 5.1  | 5.5  | 5.8  |
| 1110020A21Rik | 0.4  | 0.0  | 0.2  | 0.3  | 0.5  | 0.2  | 0.2  | 0.2  | 0.1  | 0.2  | 0.3  | 0.3  |
| 1110032A03Rik | 16.2 | 11.9 | 13.0 | 21.3 | 10.7 | 20.4 | 12.2 | 9.1  | 9.1  | 9.9  | 14.1 | 13.8 |
| 1110034G24Rik | 2.4  | 2.0  | 1.5  | 1.8  | 1.8  | 2.2  | 1.5  | 1.6  | 1.6  | 1.9  | 2.4  | 1.6  |
| 1110035M17Rik | 0.4  | 0.5  | 0.3  | 0.7  | 0.4  | 1.4  | 0.2  | 0.0  | 0.2  | 0.4  | 0.3  | 0.7  |
| 1110036E04Rik | 0.0  | 0.2  | 0.0  | 0.0  | 0.0  | 0.0  | 0.0  | 0.0  | 0.0  | 0.0  | 0.1  | 0.0  |
| 1110037F02Rik | 20.4 | 20.0 | 18.6 | 19.6 | 18.4 | 19.8 | 17.6 | 16.7 | 16.4 | 17.7 | 19.1 | 19.3 |
| 1110038B12Rik | 81.8 | 50.0 | 43.8 | 70.0 | 52.6 | 82.2 | 63.3 | 59.0 | 54.2 | 67.2 | 63.5 | 54.5 |
| 1110038F14Rik | 10.7 | 12.2 | 13.4 | 13.5 | 10.3 | 12.4 | 10.7 | 14.5 | 12.7 | 13.2 | 13.1 | 11.0 |
| 1110046J04Rik | 12.6 | 10.8 | 7.9  | 10.4 | 10.2 | 18.2 | 8.1  | 9.2  | 8.9  | 6.9  | 8.4  | 8.7  |
| 1110051M20Rik | 10.6 | 9.3  | 10.9 | 11.0 | 8.8  | 11.7 | 9.5  | 12.5 | 9.7  | 9.2  | 10.3 | 10.1 |
| 1110054M08Rik | 1.9  | 2.4  | 2.6  | 1.7  | 2.6  | 2.4  | 1.6  | 2.4  | 1.2  | 2.5  | 1.2  | 1.8  |
| 1110057K04Rik | 12.1 | 11.8 | 10.6 | 13.9 | 11.6 | 10.9 | 11.6 | 12.4 | 10.9 | 11.4 | 12.0 | 12.1 |
| 1110058L19Rik | 34.9 | 34.9 | 22.2 | 24.4 | 27.4 | 31.6 | 21.0 | 26.1 | 26.1 | 30.2 | 31.6 | 25.4 |
| 1110059E24Rik | 10.5 | 10.5 | 11.5 | 11.2 | 10.3 | 11.1 | 10.0 | 10.9 | 10.9 | 10.5 | 11.2 | 11.6 |
| 1110059G10Rik | 3.0  | 2.8  | 3.2  | 2.6  | 2.8  | 3.3  | 2.9  | 3.4  | 2.9  | 2.9  | 3.3  | 3.1  |
| 1110059M19Rik | 0.3  | 0.0  | 0.0  | 0.2  | 0.0  | 0.0  | 0.1  | 0.0  | 0.0  | 0.2  | 0.2  | 0.0  |
| 1110065P20Rik | 21.1 | 17.4 | 15.7 | 15.9 | 17.6 | 18.0 | 19.7 | 21.5 | 25.0 | 22.6 | 19.6 | 18.0 |
| 1190002F15Rik | 3.3  | 4.0  | 6.2  | 0.6  | 5.9  | 2.0  | 7.8  | 1.6  | 4.1  | 2.8  | 4.5  | 3.5  |
| 1190002N15Rik | 28.7 | 27.2 | 24.8 | 18.7 | 18.1 | 19.6 | 27.3 | 25.0 | 31.4 | 34.2 | 41.5 | 29.8 |
| 1190003J15Rik | 0.2  | 0.1  | 0.1  | 0.3  | 0.1  | 0.4  | 0.1  | 0.1  | 0.0  | 0.1  | 0.0  | 0.1  |
| 1190005I06Rik | 1.0  | 0.9  | 0.9  | 0.3  | 0.7  | 1.1  | 0.5  | 0.9  | 0.8  | 1.3  | 0.4  | 1.0  |
| 1190007I07Rik | 3.6  | 3.6  | 3.1  | 6.7  | 3.0  | 4.3  | 2.4  | 2.2  | 2.3  | 4.2  | 4.6  | 2.7  |
| 1200011I18Rik | 9.1  | 9.8  | 10.7 | 10.6 | 9.1  | 10.2 | 8.9  | 9.8  | 8.4  | 9.5  | 11.4 | 11.3 |
| 1200014J11Rik | 5.8  | 5.9  | 6.6  | 5.1  | 4.9  | 5.1  | 6.8  | 6.7  | 6.1  | 5.4  | 7.1  | 6.3  |
| 1300002E11Rik | 5.2  | 3.5  | 5.0  | 6.8  | 4.2  | 5.8  | 4.6  | 5.6  | 4.8  | 3.3  | 5.6  | 5.4  |
| 1300002K09Rik | 0.1  | 0.1  | 0.1  | 0.2  | 0.2  | 0.0  | 0.1  | 0.1  | 0.0  | 0.1  | 0.0  | 0.0  |
| 1300017J02Rik | 0.0  | 0.1  | 0.0  | 0.1  | 0.1  | 0.0  | 0.0  | 0.1  | 0.0  | 0.0  | 0.1  | 0.1  |
| 1300018J18Rik | 7.3  | 6.1  | 6.1  | 8.4  | 6.6  | 7.8  | 8.1  | 6.2  | 6.5  | 7.5  | 7.4  | 6.8  |
| 1500002O10Rik | 0.2  | 0.0  | 0.1  | 0.1  | 0.0  | 0.1  | 0.0  | 0.0  | 0.0  | 0.1  | 0.0  | 0.1  |
| 1500004A13Rik | 1.4  | 1.6  | 1.5  | 1.4  | 1.6  | 1.6  | 1.6  | 1.6  | 1.0  | 1.2  | 1.5  | 1.7  |
| 1500009L16Rik | 5.2  | 7.6  | 9.3  | 8.1  | 13.8 | 10.0 | 6.7  | 3.5  | 3.6  | 3.0  | 2.9  | 3.4  |
| 1500011B03Rik | 4.6  | 5.2  | 4.8  | 6.5  | 5.5  | 6.1  | 4.9  | 4.8  | 4.8  | 4.9  | 4.6  | 3.8  |
| 1500011K16Rik | 20.1 | 15.3 | 13.2 | 21.1 | 19.0 | 22.6 | 14.7 | 17.5 | 15.3 | 13.6 | 16.0 | 14.4 |
| 1500012F01Rik | 26.8 | 15.4 | 17.8 | 18.2 | 18.4 | 24.9 | 19.8 | 23.8 | 23.6 | 33.3 | 30.8 | 32.2 |
| 1500015A07Rik | 0.7  | 0.4  | 0.6  | 1.1  | 0.9  | 0.8  | 0.7  | 0.7  | 0.6  | 0.3  | 0.6  | 0.9  |
| 1500015L24Rik | 0.0  | 0.0  | 0.0  | 0.0  | 0.0  | 0.1  | 0.0  | 0.0  | 0.0  | 0.0  | 0.0  | 0.0  |
| 1500015O10Rik | 7.1  | 8.5  | 9.6  | 5.9  | 6.6  | 5.9  | 10.6 | 7.7  | 11.9 | 12.2 | 7.9  | 8.4  |
| 1500017E21Rik | 0.2  | 0.3  | 0.4  | 0.6  | 0.6  | 0.1  | 0.5  | 0.2  | 0.2  | 0.2  | 0.5  | 0.3  |
| 1500032L24Rik | 77.3 | 60.4 | 61.8 | 73.9 | 75.7 | 71.6 | 76.8 | 73.1 | 73.1 | 87.9 | 84.7 | 94.0 |
| 1600002H07Rik | 5.1  | 5.7  | 5.1  | 9.3  | 5.7  | 9.5  | 4.3  | 3.3  | 3.0  | 3.7  | 3.6  | 2.8  |
| 1600002K03Rik | 21.1 | 14.6 | 11.1 | 19.5 | 15.7 | 16.5 | 16.7 | 13.2 | 16.5 | 18.3 | 17.3 | 17.6 |
| 1600010M07Rik | 0.1  | 0.0  | 0.2  | 0.8  | 0.7  | 0.0  | 0.0  | 0.0  | 0.0  | 0.2  | 0.0  | 0.1  |
| 1600012H06Rik | 12.6 | 13.0 | 15.0 | 14.0 | 14.3 | 15.8 | 15.5 | 17.0 | 18.3 | 19.4 | 20.1 | 21.5 |
| 1600014C10Rik | 12.6 | 11.1 | 11.0 | 12.9 | 12.3 | 10.9 | 12.6 | 11.1 | 11.9 | 12.5 | 13.6 | 13.2 |
| 1600014C23Rik | 0.0  | 0.0  | 0.1  | 0.3  | 0.2  | 0.0  | 0.0  | 0.1  | 0.0  | 0.0  | 0.3  | 0.1  |
| 1600016N20Rik | 0.0  | 0.3  | 0.1  | 0.0  | 0.0  | 0.0  | 0.1  | 0.1  | 0.0  | 0.1  | 0.1  | 0.0  |
| 1600020E01Rik | 5.6  | 4.4  | 3.5  | 2.8  | 3.9  | 4.5  | 2.2  | 3.8  | 3.1  | 4.8  | 3.5  | 4.0  |
| 1600023N17Rik | 0.1  | 0.1  | 0.1  | 0.2  | 0.2  | 0.1  | 0.2  | 0.3  | 0.1  | 0.0  | 0.1  | 0.0  |
| 1600029D21Rik | 0.2  | 0.0  | 0.0  | 0.1  | 0.0  | 0.0  | 0.2  | 0.0  | 0.0  | 0.1  | 0.1  | 0.0  |
| 1700001C19Rik | 0.0  | 0.0  | 0.0  | 0.0  | 0.1  | 0.1  | 0.0  | 0.0  | 0.0  | 0.0  | 0.0  | 0.0  |
| 1700001G11Rik | 0.6  | 0.9  | 0.9  | 0.4  | 0.8  | 0.9  | 0.5  | 0.9  | 0.7  | 0.9  | 0.2  | 0.6  |

Online Table 1

|               |      |      |      |      |      |      |      |      |      |      |      |      |
|---------------|------|------|------|------|------|------|------|------|------|------|------|------|
| 1700001G17Rik | 0.1  | 0.1  | 0.3  | 0.1  | 0.3  | 0.1  | 0.3  | 0.4  | 0.1  | 0.2  | 0.2  | 0.1  |
| 1700001J03Rik | 0.0  | 0.1  | 0.0  | 0.0  | 0.1  | 0.1  | 0.2  | 0.1  | 0.1  | 0.0  | 0.0  | 0.0  |
| 1700001J11Rik | 0.1  | 0.1  | 0.1  | 0.0  | 0.1  | 0.0  | 0.0  | 0.1  | 0.0  | 0.1  | 0.0  | 0.0  |
| 1700001K19Rik | 0.2  | 0.1  | 0.1  | 0.3  | 0.2  | 0.3  | 0.2  | 0.0  | 0.1  | 0.1  | 0.1  | 0.1  |
| 1700001K23Rik | 0.1  | 0.2  | 0.1  | 0.0  | 0.0  | 0.0  | 0.2  | 0.1  | 0.2  | 0.0  | 0.0  | 0.2  |
| 1700001L05Rik | 0.4  | 0.7  | 0.4  | 0.3  | 0.6  | 0.4  | 0.4  | 0.3  | 0.3  | 0.5  | 0.4  | 0.3  |
| 1700001L19Rik | 0.0  | 0.0  | 0.0  | 0.0  | 0.1  | 0.0  | 0.1  | 0.0  | 0.0  | 0.0  | 0.0  | 0.0  |
| 1700001O22Rik | 0.1  | 0.2  | 0.2  | 0.1  | 0.2  | 0.2  | 0.2  | 0.2  | 0.2  | 0.1  | 0.2  | 0.0  |
| 1700001P01Rik | 0.0  | 0.0  | 0.0  | 0.0  | 0.0  | 0.1  | 0.0  | 0.1  | 0.1  | 0.1  | 0.1  | 0.0  |
| 1700003E16Rik | 0.6  | 0.9  | 0.8  | 0.4  | 0.8  | 0.8  | 0.7  | 0.2  | 0.4  | 0.2  | 0.3  | 0.7  |
| 1700003F12Rik | 0.8  | 0.6  | 0.2  | 0.6  | 0.5  | 0.7  | 0.2  | 0.1  | 0.2  | 0.3  | 0.6  | 0.2  |
| 1700003M02Rik | 0.2  | 0.2  | 0.0  | 0.3  | 0.2  | 0.1  | 0.1  | 0.0  | 0.1  | 0.2  | 0.1  | 0.2  |
| 1700003M07Rik | 1.0  | 0.9  | 0.6  | 0.8  | 0.9  | 0.6  | 0.9  | 0.5  | 0.5  | 1.0  | 1.0  | 0.7  |
| 1700007B14Rik | 0.0  | 0.0  | 0.1  | 0.0  | 0.0  | 0.0  | 0.0  | 0.0  | 0.1  | 0.0  | 0.0  | 0.0  |
| 1700007G11Rik | 0.2  | 0.2  | 0.1  | 0.1  | 0.1  | 0.1  | 0.0  | 0.1  | 0.1  | 0.4  | 0.0  | 0.1  |
| 1700007J10Rik | 0.8  | 1.0  | 0.7  | 0.7  | 1.1  | 0.8  | 1.2  | 1.3  | 1.0  | 1.1  | 1.0  | 1.0  |
| 1700007K13Rik | 6.9  | 6.9  | 7.4  | 4.1  | 7.7  | 5.9  | 3.6  | 3.2  | 3.2  | 6.1  | 5.8  | 6.0  |
| 1700007L15Rik | 2.4  | 1.7  | 2.1  | 1.0  | 1.1  | 1.8  | 1.1  | 1.5  | 1.6  | 1.1  | 2.1  | 0.5  |
| 1700007P06Rik | 0.1  | 0.0  | 0.1  | 0.0  | 0.1  | 0.1  | 0.2  | 0.0  | 0.0  | 0.0  | 0.1  | 0.0  |
| 1700008F21Rik | 0.0  | 0.0  | 0.0  | 0.0  | 0.0  | 0.0  | 0.0  | 0.0  | 0.0  | 0.1  | 0.1  | 0.0  |
| 1700008I05Rik | 0.1  | 0.0  | 0.0  | 0.1  | 0.2  | 0.2  | 0.0  | 0.0  | 0.0  | 0.0  | 0.0  | 0.0  |
| 1700008J07Rik | 0.9  | 0.9  | 0.6  | 0.6  | 1.1  | 1.1  | 1.2  | 0.6  | 0.7  | 1.2  | 1.2  | 0.9  |
| 1700008O03Rik | 0.0  | 0.0  | 0.0  | 0.0  | 0.0  | 0.4  | 0.1  | 0.1  | 0.0  | 0.0  | 0.1  | 0.2  |
| 1700009N14Rik | 0.2  | 0.2  | 0.0  | 0.0  | 0.0  | 0.0  | 0.1  | 0.1  | 0.1  | 0.1  | 0.2  | 0.1  |
| 1700009P17Rik | 1.8  | 2.1  | 1.7  | 1.5  | 1.8  | 1.8  | 1.6  | 1.3  | 1.1  | 1.4  | 1.6  | 1.9  |
| 1700010I14Rik | 2.3  | 1.7  | 1.6  | 2.5  | 1.7  | 2.1  | 1.4  | 1.1  | 1.1  | 1.9  | 1.6  | 1.5  |
| 1700011J10Rik | 1.8  | 1.6  | 1.6  | 1.4  | 1.2  | 1.9  | 1.4  | 2.3  | 1.6  | 1.9  | 1.1  | 1.6  |
| 1700012B15Rik | 2.7  | 3.1  | 2.0  | 3.3  | 3.4  | 3.8  | 3.0  | 2.2  | 2.4  | 3.1  | 3.0  | 2.9  |
| 1700012D01Rik | 1.0  | 1.1  | 2.1  | 0.0  | 1.3  | 1.2  | 1.5  | 1.4  | 1.5  | 1.1  | 0.8  | 0.9  |
| 1700012D14Rik | 0.2  | 0.2  | 0.3  | 0.6  | 0.3  | 0.2  | 0.3  | 0.1  | 0.1  | 0.2  | 0.2  | 0.2  |
| 1700013G23Rik | 1.8  | 0.6  | 1.1  | 1.0  | 1.4  | 1.0  | 1.5  | 0.7  | 0.8  | 0.5  | 0.6  | 1.3  |
| 1700015F17Rik | 0.2  | 0.1  | 0.0  | 0.0  | 0.0  | 0.1  | 0.0  | 0.0  | 0.2  | 0.0  | 0.2  | 0.0  |
| 1700016K19Rik | 0.0  | 0.0  | 0.1  | 0.0  | 0.0  | 0.1  | 0.0  | 0.0  | 0.0  | 0.0  | 0.0  | 0.0  |
| 1700016L04Rik | 0.0  | 0.0  | 0.0  | 0.0  | 0.1  | 0.0  | 0.0  | 0.0  | 0.0  | 0.0  | 0.1  | 0.0  |
| 1700017B05Rik | 1.8  | 2.1  | 1.9  | 2.3  | 3.7  | 1.6  | 2.9  | 3.4  | 3.0  | 3.0  | 2.9  | 2.6  |
| 1700018L02Rik | 3.3  | 3.4  | 2.6  | 2.1  | 2.3  | 2.5  | 4.0  | 4.4  | 2.9  | 3.3  | 2.7  | 4.0  |
| 1700019B21Rik | 0.3  | 0.3  | 0.1  | 0.2  | 0.2  | 0.2  | 0.0  | 0.0  | 0.0  | 0.3  | 0.1  | 0.2  |
| 1700019G17Rik | 0.7  | 0.6  | 0.4  | 0.3  | 0.3  | 0.2  | 0.2  | 0.3  | 0.4  | 0.5  | 0.3  | 0.2  |
| 1700019L03Rik | 1.3  | 0.5  | 0.3  | 1.4  | 0.8  | 0.7  | 0.9  | 0.4  | 0.6  | 0.8  | 0.5  | 0.6  |
| 1700020D05Rik | 0.2  | 0.8  | 0.3  | 0.5  | 0.4  | 0.4  | 0.3  | 0.4  | 0.3  | 0.3  | 0.6  | 0.3  |
| 1700020I14Rik | 39.6 | 41.4 | 39.4 | 52.5 | 41.2 | 46.4 | 38.3 | 31.2 | 38.1 | 36.3 | 42.9 | 40.5 |
| 1700020L24Rik | 0.8  | 0.7  | 0.8  | 0.9  | 0.7  | 1.3  | 0.8  | 0.8  | 0.9  | 0.5  | 0.6  | 0.6  |
| 1700021F05Rik | 20.8 | 16.7 | 20.5 | 28.1 | 16.1 | 25.1 | 23.5 | 18.3 | 15.9 | 17.7 | 21.4 | 25.8 |
| 1700021K19Rik | 8.4  | 9.0  | 7.9  | 9.9  | 8.3  | 10.1 | 8.2  | 8.7  | 9.0  | 7.5  | 8.2  | 7.5  |
| 1700022I11Rik | 0.1  | 0.2  | 0.1  | 0.0  | 0.1  | 0.1  | 0.1  | 0.1  | 0.0  | 0.2  | 0.1  | 0.1  |
| 1700023A16Rik | 0.1  | 0.1  | 0.0  | 0.1  | 0.0  | 0.0  | 0.1  | 0.0  | 0.0  | 0.0  | 0.1  | 0.1  |
| 1700023F06Rik | 0.2  | 0.2  | 0.0  | 0.1  | 0.1  | 0.4  | 0.1  | 0.0  | 0.0  | 0.1  | 0.2  | 0.1  |
| 1700024P16Rik | 0.2  | 0.3  | 0.0  | 0.6  | 0.3  | 0.4  | 0.3  | 0.1  | 0.1  | 0.2  | 0.3  | 0.3  |
| 1700025E21Rik | 0.6  | 0.2  | 0.1  | 0.4  | 0.1  | 0.3  | 0.3  | 0.0  | 0.1  | 0.2  | 0.1  | 0.3  |
| 1700025G04Rik | 2.4  | 2.1  | 2.7  | 1.9  | 2.2  | 2.7  | 2.1  | 2.9  | 2.0  | 2.6  | 2.9  | 2.5  |
| 1700025N23Rik | 0.0  | 0.0  | 0.1  | 0.3  | 0.0  | 0.1  | 0.0  | 0.0  | 0.0  | 0.0  | 0.0  | 0.1  |
| 1700026D08Rik | 0.1  | 0.1  | 0.1  | 0.2  | 0.0  | 0.0  | 0.2  | 0.0  | 0.0  | 0.0  | 0.0  | 0.0  |
| 1700026L06Rik | 0.4  | 0.4  | 0.2  | 0.4  | 0.5  | 0.3  | 0.2  | 0.3  | 0.4  | 0.4  | 0.4  | 0.1  |
| 1700028D13Rik | 0.1  | 0.1  | 0.1  | 0.0  | 0.1  | 0.2  | 0.1  | 0.1  | 0.0  | 0.1  | 0.3  | 0.0  |
| 1700028E10Rik | 0.0  | 0.1  | 0.0  | 0.0  | 0.0  | 0.0  | 0.1  | 0.0  | 0.0  | 0.0  | 0.0  | 0.0  |
| 1700028I16Rik | 0.1  | 0.1  | 0.1  | 0.0  | 0.2  | 0.1  | 0.0  | 0.1  | 0.1  | 0.3  | 0.2  | 0.0  |
| 1700028J19Rik | 0.1  | 0.3  | 0.2  | 0.1  | 0.2  | 0.2  | 0.3  | 0.2  | 0.2  | 0.1  | 0.1  | 0.1  |

Online Table 1

|               |      |      |      |      |      |      |      |      |      |      |      |      |
|---------------|------|------|------|------|------|------|------|------|------|------|------|------|
| 1700028K03Rik | 0.1  | 0.0  | 0.1  | 0.1  | 0.1  | 0.2  | 0.1  | 0.1  | 0.1  | 0.2  | 0.1  | 0.1  |
| 1700028P14Rik | 0.1  | 0.0  | 0.0  | 0.1  | 0.0  | 0.0  | 0.1  | 0.0  | 0.0  | 0.0  | 0.0  | 0.0  |
| 1700029H14Rik | 0.0  | 0.0  | 0.1  | 0.0  | 0.1  | 0.0  | 0.1  | 0.1  | 0.0  | 0.0  | 0.0  | 0.1  |
| 1700029I15Rik | 0.0  | 0.2  | 0.1  | 0.7  | 0.0  | 0.0  | 0.0  | 0.0  | 0.0  | 0.0  | 1.0  | 0.2  |
| 1700029J07Rik | 1.4  | 1.0  | 1.2  | 1.2  | 0.7  | 1.9  | 0.5  | 0.9  | 0.7  | 0.8  | 0.9  | 0.8  |
| 1700030C10Rik | 1.3  | 0.8  | 0.7  | 1.1  | 0.5  | 1.3  | 0.8  | 0.5  | 0.6  | 0.8  | 0.5  | 0.5  |
| 1700030J22Rik | 0.3  | 0.3  | 0.2  | 0.3  | 0.3  | 0.4  | 0.3  | 0.3  | 0.2  | 0.3  | 0.2  | 0.2  |
| 1700030K09Rik | 2.9  | 2.5  | 2.5  | 3.1  | 2.5  | 2.8  | 2.5  | 2.5  | 2.4  | 3.2  | 2.3  | 2.5  |
| 1700030L20Rik | 0.9  | 1.1  | 0.6  | 0.5  | 1.2  | 0.6  | 0.9  | 0.7  | 0.5  | 1.2  | 1.0  | 0.4  |
| 1700034E13Rik | 0.3  | 0.0  | 0.2  | 0.3  | 0.0  | 0.0  | 0.0  | 0.0  | 0.3  | 0.1  | 0.7  | 0.3  |
| 1700034F02Rik | 0.2  | 0.2  | 0.2  | 0.1  | 0.2  | 0.2  | 0.2  | 0.2  | 0.1  | 0.4  | 0.2  | 0.3  |
| 1700034H15Rik | 0.0  | 0.1  | 0.0  | 0.0  | 0.0  | 0.0  | 0.0  | 0.0  | 0.0  | 0.0  | 0.0  | 0.0  |
| 1700034I23Rik | 0.0  | 0.1  | 0.0  | 0.0  | 0.0  | 0.0  | 0.0  | 0.1  | 0.1  | 0.0  | 0.0  | 0.0  |
| 1700034J05Rik | 0.4  | 1.0  | 0.6  | 0.4  | 0.4  | 0.6  | 0.5  | 0.7  | 0.4  | 0.6  | 0.6  | 0.6  |
| 1700034P13Rik | 2.9  | 3.9  | 3.9  | 3.8  | 4.1  | 3.1  | 4.0  | 3.7  | 3.9  | 4.0  | 3.9  | 3.8  |
| 1700037C18Rik | 0.6  | 0.5  | 0.7  | 1.0  | 0.4  | 1.2  | 0.6  | 0.6  | 0.9  | 0.6  | 0.4  | 0.3  |
| 1700037H04Rik | 15.4 | 16.2 | 11.1 | 20.1 | 15.2 | 21.3 | 21.0 | 13.0 | 23.6 | 16.9 | 17.6 | 16.1 |
| 1700040L02Rik | 1.1  | 0.9  | 0.4  | 0.6  | 0.5  | 0.5  | 0.5  | 0.3  | 0.3  | 0.5  | 0.8  | 0.4  |
| 1700042O10Rik | 0.1  | 0.1  | 0.1  | 0.2  | 0.2  | 0.0  | 0.0  | 0.0  | 0.0  | 0.0  | 0.0  | 0.1  |
| 1700047G03Rik | 0.2  | 0.1  | 0.0  | 0.0  | 0.0  | 0.0  | 0.0  | 0.1  | 0.0  | 0.0  | 0.2  | 0.1  |
| 1700047M11Rik | 0.1  | 0.2  | 0.4  | 0.0  | 0.1  | 0.1  | 0.1  | 0.1  | 0.1  | 0.0  | 0.0  | 0.0  |
| 1700048M11Rik | 0.2  | 0.5  | 0.1  | 0.6  | 0.5  | 0.3  | 0.3  | 0.3  | 0.4  | 0.1  | 0.0  | 0.1  |
| 1700048O20Rik | 0.6  | 0.5  | 0.2  | 0.2  | 0.3  | 0.4  | 0.3  | 0.2  | 0.5  | 0.3  | 0.2  | 0.3  |
| 1700049G17Rik | 1.8  | 2.0  | 2.1  | 1.4  | 1.7  | 2.0  | 1.5  | 1.8  | 1.7  | 1.9  | 1.6  | 2.2  |
| 1700052K11Rik | 2.4  | 2.7  | 2.9  | 2.2  | 2.3  | 2.0  | 2.4  | 3.3  | 3.1  | 3.0  | 3.2  | 3.5  |
| 1700052N19Rik | 6.1  | 8.6  | 9.7  | 5.4  | 6.9  | 4.8  | 6.6  | 6.7  | 7.0  | 6.8  | 6.5  | 7.6  |
| 1700055N04Rik | 0.0  | 0.0  | 0.0  | 0.0  | 0.1  | 0.1  | 0.0  | 0.0  | 0.0  | 0.1  | 0.0  | 0.0  |
| 1700056E22Rik | 0.4  | 0.3  | 0.2  | 0.5  | 0.4  | 0.1  | 0.1  | 0.4  | 0.4  | 0.5  | 0.4  | 0.1  |
| 1700057G04Rik | 0.0  | 0.2  | 0.0  | 0.1  | 0.0  | 0.1  | 0.0  | 0.0  | 0.0  | 0.0  | 0.0  | 0.0  |
| 1700058G18Rik | 0.0  | 0.0  | 0.0  | 0.0  | 0.0  | 0.1  | 0.1  | 0.0  | 0.0  | 0.0  | 0.0  | 0.1  |
| 1700061G19Rik | 0.3  | 0.2  | 0.1  | 0.2  | 0.1  | 0.3  | 0.2  | 0.2  | 0.1  | 0.0  | 0.3  | 0.1  |
| 1700061I17Rik | 0.2  | 0.2  | 0.5  | 0.0  | 0.2  | 0.0  | 0.3  | 0.1  | 0.1  | 0.2  | 0.0  | 0.1  |
| 1700063D05Rik | 0.1  | 0.2  | 0.1  | 0.1  | 0.0  | 0.2  | 0.0  | 0.0  | 0.1  | 0.3  | 0.1  | 0.2  |
| 1700066B19Rik | 0.2  | 0.2  | 0.1  | 0.1  | 0.1  | 0.1  | 0.1  | 0.2  | 0.1  | 0.0  | 0.0  | 0.1  |
| 1700066J24Rik | 2.4  | 2.3  | 2.0  | 3.5  | 2.3  | 3.3  | 3.1  | 2.0  | 2.2  | 3.3  | 2.3  | 2.4  |
| 1700066M21Rik | 2.7  | 3.3  | 4.4  | 3.4  | 2.9  | 3.3  | 2.9  | 2.9  | 3.7  | 3.8  | 4.0  | 3.6  |
| 1700067K01Rik | 0.3  | 0.0  | 0.2  | 0.3  | 0.1  | 0.0  | 0.1  | 0.3  | 0.1  | 0.1  | 0.1  | 0.2  |
| 1700071K01Rik | 0.0  | 0.0  | 0.0  | 0.1  | 0.1  | 0.0  | 0.0  | 0.0  | 0.1  | 0.1  | 0.0  | 0.0  |
| 1700071M16Rik | 0.1  | 0.0  | 0.0  | 0.8  | 0.6  | 0.0  | 0.0  | 0.1  | 0.0  | 0.1  | 0.1  | 0.0  |
| 1700073E17Rik | 0.0  | 0.0  | 0.0  | 0.0  | 0.0  | 0.0  | 0.0  | 0.0  | 0.0  | 0.0  | 0.0  | 0.0  |
| 1700084C01Rik | 0.0  | 0.1  | 0.0  | 0.1  | 0.0  | 0.0  | 0.0  | 0.0  | 0.0  | 0.0  | 0.0  | 0.0  |
| 1700084E18Rik | 0.1  | 0.4  | 0.6  | 0.0  | 0.7  | 0.0  | 0.2  | 0.5  | 0.4  | 0.1  | 0.2  | 0.5  |
| 1700084J12Rik | 0.1  | 0.1  | 0.1  | 0.4  | 0.0  | 0.0  | 0.1  | 0.0  | 0.0  | 0.1  | 0.2  | 0.0  |
| 1700086O06Rik | 0.8  | 0.1  | 0.4  | 1.1  | 0.8  | 0.3  | 0.4  | 0.5  | 0.3  | 0.6  | 0.4  | 0.4  |
| 1700088E04Rik | 4.6  | 4.9  | 3.1  | 4.0  | 3.6  | 4.8  | 3.3  | 3.8  | 3.8  | 4.5  | 5.4  | 3.5  |
| 1700093K21Rik | 0.0  | 0.1  | 0.0  | 0.2  | 0.0  | 0.0  | 0.0  | 0.0  | 0.0  | 0.0  | 0.0  | 0.0  |
| 1700094D03Rik | 1.0  | 0.7  | 0.7  | 1.1  | 0.8  | 1.2  | 0.6  | 0.5  | 0.5  | 0.7  | 0.7  | 0.5  |
| 1700094J05Rik | 0.1  | 0.1  | 0.5  | 0.2  | 0.4  | 0.4  | 0.3  | 0.5  | 0.2  | 0.4  | 0.3  | 0.1  |
| 1700096K18Rik | 0.4  | 0.4  | 0.4  | 0.8  | 0.4  | 0.8  | 0.5  | 0.6  | 0.3  | 0.4  | 0.7  | 0.8  |
| 1700101E01Rik | 0.0  | 0.4  | 0.1  | 0.0  | 0.0  | 0.2  | 0.0  | 0.0  | 0.1  | 0.0  | 0.0  | 0.0  |
| 1700101I11Rik | 0.0  | 0.2  | 0.4  | 0.1  | 0.2  | 0.2  | 0.0  | 0.1  | 0.2  | 0.5  | 0.0  | 0.2  |
| 1700102P08Rik | 0.0  | 0.3  | 0.1  | 0.0  | 0.1  | 0.0  | 0.1  | 0.2  | 0.2  | 0.1  | 0.2  | 0.1  |
| 1700105P06Rik | 0.4  | 0.4  | 0.1  | 0.1  | 0.2  | 0.3  | 0.0  | 0.2  | 0.2  | 0.1  | 0.1  | 0.1  |
| 1700108F19Rik | 0.0  | 0.0  | 0.0  | 0.1  | 0.1  | 0.0  | 0.0  | 0.0  | 0.0  | 0.1  | 0.0  | 0.1  |
| 1700109F18Rik | 0.0  | 0.0  | 0.0  | 0.0  | 0.0  | 0.0  | 0.0  | 0.1  | 0.0  | 0.0  | 0.0  | 0.1  |
| 1700109H08Rik | 0.3  | 0.1  | 0.2  | 0.3  | 0.3  | 0.2  | 0.6  | 0.4  | 0.2  | 0.4  | 0.2  | 0.3  |
| 1700110C19Rik | 0.0  | 0.0  | 0.1  | 0.1  | 0.0  | 0.0  | 0.0  | 0.0  | 0.0  | 0.0  | 0.0  | 0.1  |

Online Table 1



|               |       |       |       |       |       |       |       |       |       |       |       |       |
|---------------|-------|-------|-------|-------|-------|-------|-------|-------|-------|-------|-------|-------|
| 1700111N16Rik | 0.0   | 0.0   | 0.0   | 0.0   | 0.0   | 0.0   | 0.0   | 0.0   | 0.0   | 0.0   | 0.0   | 0.0   |
| 1700112E06Rik | 4.0   | 3.2   | 3.7   | 4.9   | 3.9   | 6.3   | 3.5   | 2.9   | 2.0   | 3.4   | 1.8   | 3.3   |
| 1700113A16Rik | 1.0   | 0.9   | 0.8   | 1.5   | 0.8   | 1.1   | 0.7   | 0.7   | 1.1   | 0.7   | 0.8   | 0.8   |
| 1700120C14Rik | 0.4   | 0.2   | 0.1   | 1.6   | 0.3   | 0.3   | 0.0   | 0.4   | 0.1   | 0.0   | 0.2   | 0.8   |
| 1700120K04Rik | 0.2   | 0.4   | 0.0   | 0.4   | 0.1   | 0.0   | 0.0   | 0.0   | 0.2   | 0.3   | 0.6   | 0.4   |
| 1700123I01Rik | 0.0   | 0.0   | 0.0   | 0.0   | 0.0   | 0.0   | 0.0   | 0.0   | 0.0   | 0.0   | 0.0   | 0.1   |
| 1700123L14Rik | 0.1   | 0.2   | 0.1   | 0.2   | 0.1   | 0.1   | 0.1   | 0.1   | 0.2   | 0.0   | 0.1   | 0.1   |
| 1700123M08Rik | 0.5   | 0.3   | 0.2   | 0.2   | 0.2   | 0.5   | 0.2   | 0.5   | 0.5   | 0.1   | 0.4   | 0.5   |
| 1700123O20Rik | 11.8  | 10.2  | 10.1  | 11.3  | 11.5  | 12.2  | 11.7  | 11.8  | 12.1  | 12.2  | 13.6  | 11.3  |
| 1700125G22Rik | 0.1   | 0.2   | 0.0   | 0.0   | 0.1   | 0.0   | 0.0   | 0.1   | 0.0   | 0.0   | 0.0   | 0.1   |
| 1700125H03Rik | 0.0   | 0.2   | 0.3   | 0.0   | 0.5   | 0.4   | 0.8   | 0.1   | 0.3   | 0.1   | 0.0   | 0.2   |
| 1700125H20Rik | 0.0   | 0.2   | 0.2   | 0.0   | 0.0   | 0.2   | 0.0   | 0.0   | 0.0   | 0.0   | 0.0   | 0.1   |
| 1700128F08Rik | 0.0   | 0.0   | 0.0   | 0.2   | 0.0   | 0.0   | 0.0   | 0.0   | 0.0   | 0.0   | 0.0   | 0.0   |
| 1810008I18Rik | 0.5   | 0.6   | 0.1   | 0.1   | 0.1   | 0.2   | 0.2   | 0.3   | 0.1   | 0.0   | 0.6   | 0.1   |
| 1810009A15Rik | 62.9  | 61.1  | 59.7  | 73.2  | 47.2  | 62.8  | 55.1  | 60.8  | 42.3  | 56.7  | 63.8  | 61.1  |
| 1810010D01Rik | 0.3   | 0.1   | 0.0   | 0.0   | 0.1   | 0.0   | 0.0   | 0.0   | 0.1   | 0.6   | 0.0   | 0.0   |
| 1810010H24Rik | 0.2   | 0.3   | 0.6   | 0.1   | 0.5   | 0.6   | 0.1   | 0.2   | 0.5   | 0.3   | 0.2   | 0.3   |
| 1810011H11Rik | 0.5   | 0.0   | 0.0   | 2.5   | 5.4   | 0.0   | 0.8   | 0.1   | 0.1   | 0.5   | 0.0   | 0.3   |
| 1810011O10Rik | 0.3   | 0.4   | 0.9   | 0.1   | 0.4   | 0.1   | 0.6   | 1.5   | 0.9   | 3.0   | 1.6   | 1.3   |
| 1810012K16Rik | 0.1   | 0.3   | 0.4   | 0.0   | 0.4   | 0.6   | 0.2   | 0.1   | 0.3   | 0.1   | 0.0   | 0.3   |
| 1810013D10Rik | 16.1  | 13.2  | 9.6   | 11.1  | 11.3  | 12.2  | 12.9  | 13.2  | 12.0  | 14.3  | 13.0  | 12.9  |
| 1810013L24Rik | 16.8  | 20.2  | 18.6  | 19.0  | 17.7  | 19.3  | 17.2  | 17.7  | 20.4  | 19.6  | 20.2  | 19.4  |
| 1810014B01Rik | 0.6   | 0.7   | 0.6   | 1.2   | 0.4   | 0.9   | 0.4   | 0.6   | 0.6   | 0.7   | 0.6   | 0.7   |
| 1810019D21Rik | 0.8   | 0.8   | 1.2   | 0.6   | 0.7   | 0.5   | 1.4   | 0.7   | 1.1   | 1.6   | 1.6   | 1.3   |
| 1810019J16Rik | 0.0   | 0.0   | 0.1   | 0.0   | 0.0   | 0.0   | 0.1   | 0.0   | 0.0   | 0.0   | 0.0   | 0.0   |
| 1810020O05Rik | 0.1   | 0.1   | 0.0   | 0.1   | 0.0   | 0.2   | 0.2   | 0.0   | 0.0   | 0.0   | 0.0   | 0.0   |
| 1810021B22Rik | 1.3   | 1.1   | 1.5   | 2.3   | 1.4   | 1.8   | 2.4   | 2.0   | 1.3   | 1.8   | 1.2   | 2.0   |
| 1810022K09Rik | 117.2 | 123.9 | 111.2 | 141.4 | 104.4 | 130.1 | 97.7  | 114.4 | 103.8 | 123.8 | 139.4 | 130.4 |
| 1810024B03Rik | 0.1   | 0.1   | 0.1   | 0.2   | 0.1   | 0.2   | 0.2   | 0.1   | 0.1   | 0.1   | 0.1   | 0.1   |
| 1810026B05Rik | 0.9   | 1.0   | 1.3   | 0.9   | 1.1   | 1.2   | 0.9   | 1.3   | 1.4   | 1.7   | 1.3   | 1.4   |
| 1810026J23Rik | 9.4   | 9.3   | 8.6   | 9.4   | 9.3   | 8.3   | 9.0   | 8.3   | 9.9   | 10.3  | 8.8   | 9.6   |
| 1810030O07Rik | 14.4  | 13.3  | 12.6  | 14.7  | 11.4  | 13.4  | 11.7  | 13.3  | 11.3  | 12.2  | 12.6  | 12.9  |
| 1810032O08Rik | 2.8   | 2.5   | 2.2   | 2.3   | 3.5   | 2.6   | 3.4   | 2.6   | 3.3   | 2.3   | 2.1   | 2.0   |
| 1810033B17Rik | 0.1   | 0.1   | 0.1   | 0.0   | 0.1   | 0.1   | 0.1   | 0.0   | 0.0   | 0.1   | 0.1   | 0.0   |
| 1810034E14Rik | 1.8   | 1.8   | 1.1   | 1.4   | 1.5   | 2.2   | 1.4   | 1.5   | 1.0   | 0.6   | 1.5   | 1.6   |
| 1810037I17Rik | 62.6  | 61.9  | 54.6  | 67.2  | 63.9  | 62.6  | 61.4  | 53.5  | 69.4  | 80.0  | 76.2  | 80.4  |
| 1810041L15Rik | 0.0   | 0.0   | 0.0   | 0.0   | 0.0   | 0.0   | 0.0   | 0.0   | 0.0   | 0.0   | 0.0   | 0.0   |
| 1810043G02Rik | 5.7   | 6.2   | 6.7   | 7.0   | 6.9   | 8.1   | 6.8   | 6.3   | 5.7   | 7.2   | 5.9   | 6.2   |
| 1810043H04Rik | 21.8  | 21.6  | 14.7  | 21.1  | 17.6  | 21.2  | 17.1  | 19.0  | 20.8  | 19.8  | 17.9  | 17.4  |
| 1810044D09Rik | 2.5   | 2.1   | 1.3   | 1.6   | 2.1   | 2.8   | 1.2   | 0.6   | 1.5   | 3.2   | 1.6   | 1.8   |
| 1810055G02Rik | 19.4  | 18.2  | 20.2  | 23.2  | 22.1  | 19.2  | 29.3  | 21.5  | 20.0  | 18.2  | 23.4  | 20.3  |
| 1810058I24Rik | 33.2  | 27.9  | 25.9  | 32.9  | 28.7  | 33.6  | 25.7  | 32.0  | 30.3  | 35.8  | 29.0  | 29.5  |
| 1810062G17Rik | 1.7   | 2.0   | 1.4   | 1.9   | 1.2   | 1.5   | 1.2   | 1.2   | 1.0   | 0.7   | 1.2   | 1.2   |
| 1810062O18Rik | 0.6   | 0.4   | 0.5   | 0.8   | 0.7   | 0.3   | 0.6   | 0.5   | 0.6   | 0.9   | 1.1   | 0.8   |
| 1810064F22Rik | 0.0   | 0.0   | 0.0   | 0.0   | 0.0   | 0.0   | 0.0   | 0.0   | 0.0   | 0.0   | 0.0   | 0.0   |
| 1810065E05Rik | 0.3   | 0.2   | 0.2   | 0.1   | 0.1   | 0.0   | 0.1   | 0.1   | 0.0   | 0.2   | 0.2   | 0.2   |
| 2010001E11Rik | 0.2   | 0.1   | 0.1   | 0.2   | 0.1   | 0.0   | 0.1   | 0.1   | 0.1   | 0.1   | 0.0   | 0.0   |
| 2010001M06Rik | 6.7   | 8.0   | 10.5  | 5.8   | 4.6   | 14.3  | 3.0   | 3.1   | 2.9   | 7.3   | 6.0   | 8.3   |
| 2010002M12Rik | 0.6   | 0.5   | 0.4   | 0.8   | 0.4   | 0.6   | 0.3   | 0.2   | 0.2   | 0.2   | 0.2   | 0.4   |
| 2010003K11Rik | 0.0   | 0.0   | 0.1   | 0.0   | 0.1   | 0.0   | 0.1   | 0.0   | 0.0   | 0.0   | 0.1   | 0.0   |
| 2010003O02Rik | 24.9  | 18.9  | 14.9  | 19.7  | 20.9  | 27.3  | 13.7  | 19.6  | 21.0  | 23.5  | 19.2  | 19.6  |
| 2010009K17Rik | 0.1   | 0.0   | 0.0   | 0.0   | 0.3   | 0.1   | 0.0   | 0.0   | 0.0   | 0.1   | 0.1   | 0.0   |
| 2010010A06Rik | 0.0   | 0.0   | 0.1   | 0.1   | 0.1   | 0.0   | 0.0   | 0.1   | 0.1   | 0.0   | 0.0   | 0.3   |
| 2010012O05Rik | 2.6   | 2.4   | 2.0   | 2.7   | 2.3   | 2.4   | 3.1   | 3.2   | 2.3   | 2.6   | 2.8   | 3.3   |
| 2010015L04Rik | 1.2   | 1.1   | 1.2   | 1.3   | 1.1   | 1.1   | 1.4   | 1.1   | 0.5   | 1.1   | 1.3   | 0.9   |
| 2010016I18Rik | 0.1   | 0.0   | 0.0   | 0.0   | 0.0   | 0.1   | 0.0   | 0.0   | 0.0   | 0.0   | 0.0   | 0.0   |
| 2010107E04Rik | 162.1 | 126.3 | 100.0 | 122.8 | 138.8 | 147.6 | 101.6 | 117.4 | 128.4 | 143.0 | 121.9 | 121.2 |

Online Table 1

|               |      |      |      |      |      |      |      |      |      |      |      |      |
|---------------|------|------|------|------|------|------|------|------|------|------|------|------|
| 2010107G12Rik | 0.0  | 0.1  | 0.0  | 0.0  | 0.0  | 0.0  | 0.0  | 0.1  | 0.0  | 0.1  | 0.0  | 0.0  |
| 2010107G23Rik | 2.6  | 1.2  | 0.9  | 1.7  | 1.0  | 2.9  | 0.8  | 0.6  | 0.7  | 1.6  | 1.1  | 0.9  |
| 2010109A12Rik | 0.1  | 1.1  | 0.3  | 0.5  | 0.4  | 0.4  | 0.9  | 0.4  | 0.3  | 0.3  | 0.4  | 0.5  |
| 2010111I01Rik | 16.0 | 12.7 | 9.1  | 15.7 | 12.5 | 13.0 | 9.2  | 8.4  | 7.7  | 11.3 | 10.5 | 9.2  |
| 2010204K13Rik | 1.2  | 0.4  | 0.7  | 0.4  | 0.1  | 1.9  | 0.6  | 0.8  | 0.5  | 0.6  | 0.4  | 1.0  |
| 2010300C02Rik | 0.0  | 0.0  | 0.0  | 0.0  | 0.0  | 0.1  | 0.0  | 0.0  | 0.0  | 0.1  | 0.0  | 0.0  |
| 2010310C07Rik | 0.0  | 0.0  | 0.0  | 0.0  | 0.0  | 0.0  | 0.1  | 0.0  | 0.0  | 0.3  | 0.1  | 0.1  |
| 2010315B03Rik | 2.8  | 3.4  | 4.6  | 3.7  | 3.3  | 4.0  | 2.9  | 3.2  | 3.5  | 3.7  | 3.7  | 4.1  |
| 2010320M18Rik | 7.0  | 5.4  | 8.4  | 6.2  | 6.9  | 8.0  | 6.7  | 7.8  | 8.7  | 11.8 | 8.2  | 9.4  |
| 2200002D01Rik | 16.7 | 8.6  | 5.3  | 18.1 | 8.4  | 17.9 | 12.2 | 12.3 | 10.5 | 9.5  | 13.6 | 9.0  |
| 2210010C04Rik | 0.0  | 0.1  | 0.0  | 0.0  | 0.0  | 0.0  | 0.0  | 0.1  | 0.0  | 0.0  | 0.0  | 0.1  |
| 2210013O21Rik | 37.7 | 30.5 | 27.4 | 32.4 | 25.7 | 39.1 | 22.1 | 32.5 | 29.7 | 28.7 | 31.0 | 26.3 |
| 2210015D19Rik | 2.9  | 1.8  | 1.7  | 2.6  | 1.9  | 2.8  | 2.5  | 2.3  | 2.2  | 2.5  | 2.2  | 2.2  |
| 2210016F16Rik | 15.7 | 14.4 | 14.3 | 15.2 | 14.0 | 13.9 | 15.0 | 14.3 | 14.6 | 15.3 | 15.2 | 16.1 |
| 2210016L21Rik | 18.4 | 14.4 | 14.6 | 19.0 | 14.1 | 18.2 | 13.7 | 15.4 | 13.2 | 13.8 | 14.9 | 14.5 |
| 2210018M11Rik | 3.8  | 4.3  | 5.6  | 4.0  | 4.4  | 3.6  | 6.0  | 5.4  | 4.7  | 3.9  | 5.5  | 5.3  |
| 2210039B01Rik | 0.5  | 0.5  | 0.8  | 0.8  | 0.5  | 0.9  | 0.5  | 1.0  | 0.4  | 0.4  | 0.4  | 0.6  |
| 2210404J11Rik | 3.8  | 3.1  | 2.9  | 3.3  | 3.5  | 3.1  | 2.4  | 2.7  | 3.0  | 2.7  | 2.7  | 2.8  |
| 2210404O07Rik | 0.2  | 0.6  | 0.4  | 0.3  | 0.3  | 0.0  | 0.1  | 0.6  | 0.2  | 0.6  | 0.5  | 0.1  |
| 2210404O09Rik | 1.9  | 2.6  | 2.5  | 1.5  | 2.2  | 2.3  | 1.9  | 2.2  | 2.1  | 2.3  | 2.4  | 2.7  |
| 2210408F21Rik | 11.8 | 13.8 | 9.9  | 11.5 | 10.0 | 11.3 | 7.6  | 9.6  | 10.1 | 12.4 | 9.8  | 11.4 |
| 2210408I21Rik | 1.1  | 1.4  | 1.4  | 1.7  | 1.5  | 1.8  | 1.7  | 1.5  | 1.5  | 2.1  | 1.7  | 1.8  |
| 2210416O15Rik | 0.3  | 0.1  | 0.1  | 0.3  | 0.1  | 0.4  | 0.2  | 0.3  | 0.3  | 0.4  | 0.1  | 0.3  |
| 2210417K05Rik | 0.5  | 0.1  | 0.6  | 0.4  | 0.2  | 0.8  | 0.6  | 0.4  | 0.3  | 0.5  | 0.7  | 0.4  |
| 2300009A05Rik | 5.5  | 4.3  | 4.3  | 5.8  | 4.6  | 6.0  | 4.1  | 5.5  | 4.1  | 7.8  | 3.7  | 4.8  |
| 2310001H17Rik | 0.9  | 1.0  | 0.8  | 1.1  | 1.5  | 0.5  | 1.4  | 0.9  | 0.9  | 1.4  | 1.3  | 1.0  |
| 2310001K24Rik | 0.0  | 0.2  | 0.4  | 0.2  | 0.0  | 0.1  | 0.0  | 0.0  | 0.2  | 0.2  | 0.0  | 0.0  |
| 2310002F09Rik | 0.1  | 0.0  | 0.0  | 0.0  | 0.0  | 0.0  | 0.0  | 0.0  | 0.0  | 0.0  | 0.0  | 0.0  |
| 2310003H01Rik | 1.3  | 1.4  | 1.6  | 1.0  | 1.3  | 2.0  | 1.4  | 1.6  | 1.6  | 1.3  | 1.3  | 1.0  |
| 2310005E17Rik | 0.0  | 0.0  | 0.0  | 0.0  | 0.0  | 0.0  | 0.0  | 0.0  | 0.0  | 0.0  | 0.1  | 0.0  |
| 2310005G13Rik | 0.1  | 0.1  | 0.1  | 0.1  | 0.0  | 0.0  | 0.1  | 0.0  | 0.0  | 0.1  | 0.0  | 0.0  |
| 2310007B03Rik | 0.1  | 0.0  | 0.0  | 0.0  | 0.0  | 0.1  | 0.0  | 0.0  | 0.0  | 0.0  | 0.0  | 0.0  |
| 2310008H04Rik | 11.0 | 10.7 | 13.4 | 7.8  | 10.7 | 9.0  | 10.4 | 13.3 | 10.1 | 8.3  | 11.4 | 10.8 |
| 2310008H09Rik | 12.0 | 11.5 | 10.7 | 11.7 | 8.9  | 10.1 | 10.6 | 9.7  | 8.5  | 9.5  | 11.5 | 9.8  |
| 2310008N11Rik | 0.4  | 0.2  | 0.1  | 0.2  | 0.1  | 0.0  | 0.0  | 0.3  | 0.2  | 0.2  | 0.3  | 0.2  |
| 2310009A05Rik | 11.3 | 14.7 | 20.9 | 20.0 | 15.7 | 19.2 | 18.2 | 17.5 | 15.8 | 16.2 | 18.5 | 16.6 |
| 2310009B15Rik | 10.3 | 7.5  | 8.6  | 8.9  | 8.3  | 11.7 | 10.0 | 11.5 | 10.4 | 6.4  | 8.6  | 8.9  |
| 2310010J17Rik | 2.7  | 1.9  | 1.7  | 3.1  | 3.9  | 3.2  | 2.7  | 2.9  | 2.2  | 3.2  | 3.8  | 6.1  |
| 2310010M20Rik | 0.0  | 0.1  | 0.2  | 0.2  | 0.0  | 0.0  | 0.2  | 0.1  | 0.0  | 0.1  | 0.0  | 0.0  |
| 2310011J03Rik | 16.2 | 15.0 | 12.8 | 17.5 | 15.4 | 16.6 | 15.4 | 14.7 | 15.7 | 16.5 | 12.8 | 15.6 |
| 2310014F07Rik | 0.2  | 0.2  | 0.1  | 0.0  | 0.0  | 0.2  | 0.0  | 0.0  | 0.0  | 0.0  | 0.0  | 0.1  |
| 2310014L17Rik | 0.4  | 0.4  | 0.4  | 0.3  | 0.5  | 0.3  | 0.4  | 0.2  | 0.7  | 0.7  | 0.3  | 0.4  |
| 2310015A10Rik | 1.1  | 0.7  | 0.7  | 0.8  | 0.7  | 0.8  | 0.6  | 0.7  | 0.5  | 0.6  | 0.7  | 0.8  |
| 2310015D24Rik | 0.0  | 0.0  | 0.0  | 0.0  | 0.0  | 0.0  | 0.0  | 0.0  | 0.0  | 0.1  | 0.0  | 0.0  |
| 2310022A10Rik | 1.3  | 2.0  | 1.4  | 2.0  | 2.1  | 1.4  | 1.4  | 1.4  | 1.5  | 1.6  | 1.4  | 1.2  |
| 2310022B05Rik | 23.9 | 33.9 | 27.3 | 24.9 | 21.6 | 23.6 | 31.1 | 27.7 | 43.5 | 22.4 | 26.5 | 30.3 |
| 2310030G06Rik | 1.1  | 0.8  | 0.9  | 1.5  | 0.4  | 0.5  | 0.5  | 1.0  | 0.8  | 3.9  | 2.3  | 1.5  |
| 2310033P09Rik | 5.3  | 6.1  | 8.6  | 5.4  | 5.7  | 5.7  | 7.0  | 7.6  | 6.1  | 6.7  | 7.1  | 7.8  |
| 2310034G01Rik | 0.3  | 0.2  | 0.5  | 0.6  | 0.4  | 0.2  | 0.5  | 0.3  | 0.4  | 0.5  | 0.5  | 0.5  |
| 2310035C23Rik | 9.0  | 8.8  | 7.5  | 7.8  | 8.4  | 6.9  | 8.8  | 7.8  | 8.9  | 8.9  | 9.8  | 9.5  |
| 2310036O22Rik | 69.1 | 57.6 | 57.8 | 61.6 | 59.3 | 49.5 | 77.5 | 74.5 | 69.1 | 74.3 | 73.1 | 65.8 |
| 2310039H08Rik | 8.5  | 7.6  | 6.2  | 7.3  | 7.7  | 9.0  | 9.4  | 9.4  | 7.7  | 9.5  | 10.4 | 8.0  |
| 2310039L15Rik | 1.0  | 1.4  | 1.4  | 1.0  | 1.2  | 1.1  | 1.5  | 0.6  | 0.8  | 0.9  | 0.7  | 0.6  |
| 2310040G24Rik | 0.5  | 0.6  | 0.4  | 1.2  | 0.8  | 0.7  | 0.7  | 0.5  | 0.5  | 0.3  | 0.6  | 0.9  |
| 2310042D19Rik | 0.3  | 0.3  | 0.3  | 0.3  | 0.4  | 0.4  | 0.2  | 0.1  | 0.2  | 0.2  | 0.2  | 0.2  |
| 2310044G17Rik | 3.8  | 4.3  | 3.3  | 5.6  | 4.7  | 4.5  | 3.7  | 3.9  | 3.9  | 4.4  | 3.9  | 3.6  |
| 2310045N01Rik | 41.6 | 36.8 | 35.5 | 40.9 | 29.3 | 39.4 | 36.6 | 43.9 | 30.6 | 40.3 | 42.7 | 36.5 |

Online Table 1

|                |       |      |      |      |      |       |      |       |       |       |      |      |
|----------------|-------|------|------|------|------|-------|------|-------|-------|-------|------|------|
| 2310047M10Rik  | 6.5   | 7.0  | 6.8  | 6.4  | 6.7  | 6.5   | 8.7  | 7.7   | 7.9   | 7.7   | 7.6  | 6.8  |
| 2310057M21Rik  | 2.8   | 3.7  | 2.9  | 3.4  | 3.6  | 3.1   | 3.1  | 2.6   | 3.2   | 3.3   | 3.8  | 3.3  |
| 2310061I04Rik  | 2.4   | 2.8  | 2.9  | 2.9  | 2.5  | 3.1   | 3.4  | 3.2   | 2.5   | 2.2   | 2.8  | 2.6  |
| 2310061J03Rik  | 1.7   | 2.5  | 1.3  | 1.6  | 1.1  | 1.8   | 2.2  | 2.2   | 2.8   | 3.0   | 2.2  | 2.2  |
| 2310067B10Rik  | 1.6   | 2.4  | 2.8  | 1.9  | 2.2  | 2.0   | 2.1  | 2.9   | 2.7   | 2.3   | 1.9  | 1.8  |
| 2310068J16Rik  | 0.1   | 0.1  | 0.3  | 0.2  | 0.2  | 0.2   | 0.1  | 0.2   | 0.3   | 0.3   | 0.2  | 0.2  |
| 2310069B03Rik  | 0.0   | 0.0  | 0.0  | 0.0  | 0.0  | 0.2   | 0.0  | 0.0   | 0.0   | 0.0   | 0.0  | 0.0  |
| 2410002F23Rik  | 8.1   | 6.1  | 6.0  | 9.5  | 8.9  | 7.3   | 9.4  | 7.6   | 7.7   | 7.0   | 8.2  | 7.5  |
| 2410003L11Rik  | 0.1   | 0.0  | 0.1  | 0.5  | 0.1  | 0.0   | 0.1  | 0.0   | 0.1   | 0.2   | 0.2  | 0.0  |
| 2410004B18Rik  | 10.6  | 11.0 | 10.4 | 11.9 | 9.6  | 8.6   | 13.3 | 11.5  | 11.8  | 13.8  | 12.4 | 12.7 |
| 2410004I01Rik  | 0.1   | 0.2  | 0.0  | 0.0  | 0.0  | 0.2   | 0.0  | 0.0   | 0.0   | 0.0   | 0.0  | 0.0  |
| 2410004N09Rik  | 16.4  | 9.7  | 9.7  | 11.0 | 13.0 | 22.3  | 11.9 | 10.0  | 10.6  | 14.1  | 12.7 | 11.8 |
| 2410004P03Rik  | 0.1   | 0.4  | 0.7  | 0.4  | 0.4  | 0.3   | 0.2  | 0.1   | 0.2   | 0.1   | 0.1  | 0.2  |
| 2410006H16Rik  | 105.3 | 82.6 | 84.9 | 75.3 | 79.1 | 143.7 | 83.3 | 116.8 | 109.7 | 106.8 | 99.6 | 89.3 |
| 2410015M20Rik  | 70.2  | 63.4 | 51.7 | 57.7 | 58.8 | 64.6  | 53.9 | 57.1  | 57.0  | 68.3  | 63.8 | 56.3 |
| 2410016O06Rik  | 1.9   | 2.2  | 1.4  | 1.3  | 2.0  | 1.7   | 2.0  | 1.8   | 2.4   | 3.0   | 2.3  | 2.0  |
| 2410018L13Rik  | 1.9   | 1.1  | 0.8  | 1.6  | 0.9  | 1.8   | 1.4  | 1.1   | 1.5   | 1.6   | 1.2  | 1.2  |
| 2410018M08Rik  | 5.7   | 5.0  | 3.8  | 5.8  | 5.0  | 5.0   | 4.4  | 4.6   | 5.0   | 5.7   | 4.6  | 5.1  |
| 2410021H03Rik  | 0.0   | 0.2  | 0.0  | 0.0  | 0.1  | 0.1   | 0.1  | 0.1   | 0.0   | 0.0   | 0.1  | 0.0  |
| 2410057H14Rik  | 0.1   | 0.0  | 0.0  | 0.1  | 0.1  | 0.0   | 0.1  | 0.0   | 0.2   | 0.3   | 0.0  | 0.2  |
| 2410066E13Rik  | 13.4  | 11.7 | 9.8  | 15.4 | 12.1 | 14.3  | 9.0  | 7.9   | 8.2   | 7.7   | 9.4  | 9.5  |
| 2410076I21Rik  | 0.2   | 0.2  | 0.1  | 0.1  | 0.2  | 0.2   | 0.0  | 0.0   | 0.0   | 0.2   | 0.2  | 0.2  |
| 2410089E03Rik  | 2.9   | 4.0  | 4.2  | 2.8  | 3.2  | 3.6   | 3.3  | 3.8   | 3.5   | 2.9   | 3.2  | 3.0  |
| 2410127L17Rik  | 10.0  | 11.0 | 12.1 | 10.3 | 11.0 | 13.2  | 9.9  | 11.8  | 10.2  | 11.6  | 14.2 | 13.4 |
| 2410131K14Rik  | 5.7   | 4.1  | 3.3  | 5.9  | 5.0  | 5.7   | 4.8  | 4.0   | 4.5   | 4.9   | 4.4  | 3.9  |
| 2500004C02Rik  | 0.9   | 0.8  | 1.0  | 0.7  | 0.7  | 0.7   | 0.6  | 0.7   | 1.0   | 1.3   | 1.0  | 1.0  |
| 2510002D24Rik  | 2.2   | 2.6  | 3.2  | 2.5  | 2.9  | 3.1   | 2.4  | 2.8   | 2.6   | 2.0   | 2.6  | 3.3  |
| 2510003E04Rik  | 22.7  | 24.5 | 22.2 | 24.7 | 20.3 | 25.8  | 23.8 | 21.4  | 21.5  | 22.4  | 23.4 | 23.2 |
| 2510009E07Rik  | 3.0   | 4.2  | 5.2  | 4.5  | 4.9  | 4.2   | 3.8  | 5.5   | 4.5   | 4.1   | 4.5  | 5.2  |
| 2510039O18Rik  | 18.1  | 16.0 | 13.6 | 18.1 | 16.8 | 16.8  | 18.5 | 15.4  | 17.7  | 17.8  | 15.8 | 15.0 |
| 2510049J12Rik  | 0.0   | 0.0  | 0.0  | 0.0  | 0.0  | 0.0   | 0.0  | 0.0   | 0.0   | 0.0   | 0.0  | 0.0  |
| 2600006L11Rik  | 1.1   | 1.1  | 0.9  | 2.2  | 0.8  | 1.2   | 0.4  | 0.6   | 0.8   | 2.0   | 0.6  | 0.7  |
| 2610001J05Rik  | 9.8   | 10.0 | 9.3  | 10.6 | 13.5 | 10.6  | 10.9 | 10.4  | 13.9  | 13.1  | 12.0 | 11.6 |
| 2610002J02Rik  | 18.1  | 18.6 | 14.8 | 19.9 | 15.8 | 19.8  | 15.9 | 16.4  | 16.6  | 14.1  | 13.5 | 14.1 |
| 2610002M06Rik  | 2.6   | 2.9  | 3.4  | 2.5  | 2.6  | 3.2   | 3.0  | 3.3   | 2.9   | 3.2   | 3.0  | 3.6  |
| 2610005L07Rik  | 14.0  | 15.2 | 16.1 | 16.3 | 13.3 | 15.9  | 16.0 | 14.8  | 15.1  | 12.2  | 14.8 | 14.5 |
| 2610008E11Rik  | 24.9  | 24.3 | 18.4 | 29.5 | 18.4 | 29.4  | 18.8 | 13.7  | 21.4  | 17.5  | 23.5 | 21.7 |
| 2610015P09Rik  | 3.0   | 2.5  | 3.1  | 3.2  | 2.0  | 3.0   | 2.0  | 1.9   | 1.9   | 2.4   | 2.6  | 2.5  |
| 2610018G03Rik  | 0.5   | 0.3  | 0.5  | 0.1  | 0.3  | 0.1   | 0.1  | 0.4   | 1.2   | 11.9  | 5.7  | 3.0  |
| 2610019E17Rik  | 6.5   | 6.0  | 3.9  | 6.0  | 7.3  | 4.2   | 5.6  | 11.6  | 3.9   | 6.0   | 10.2 | 7.3  |
| 2610019F03Rik  | 13.4  | 10.8 | 10.3 | 13.3 | 8.3  | 9.5   | 8.9  | 8.0   | 10.2  | 16.2  | 11.8 | 12.8 |
| 2610020C07Rik  | 0.3   | 0.3  | 0.6  | 0.2  | 0.2  | 0.4   | 0.3  | 0.4   | 0.2   | 0.2   | 0.5  | 0.3  |
| 2610020H08Rik  | 2.1   | 2.2  | 1.9  | 0.9  | 1.7  | 1.0   | 2.3  | 1.6   | 2.3   | 2.0   | 1.6  | 1.9  |
| 2610027K06Rik  | 0.3   | 0.3  | 0.3  | 0.6  | 0.3  | 0.4   | 0.7  | 0.4   | 0.4   | 0.3   | 0.2  | 0.2  |
| 2610034B18Rik  | 7.3   | 7.3  | 9.5  | 8.7  | 7.8  | 8.8   | 10.9 | 7.9   | 8.8   | 6.6   | 9.1  | 9.3  |
| 2610035D17Rik  | 1.6   | 2.0  | 1.9  | 2.8  | 2.2  | 2.7   | 2.0  | 2.4   | 2.3   | 2.0   | 2.1  | 1.6  |
| 2610037D02Rik  | 0.0   | 0.0  | 0.0  | 0.0  | 0.0  | 0.0   | 0.0  | 0.0   | 0.0   | 0.0   | 0.0  | 0.0  |
| 2610044O15Rik8 | 3.9   | 3.3  | 3.8  | 3.1  | 4.4  | 2.9   | 3.8  | 3.7   | 3.7   | 3.2   | 4.5  | 3.6  |
| 2610203C20Rik  | 6.1   | 8.6  | 8.4  | 6.7  | 7.0  | 8.4   | 7.5  | 5.7   | 5.9   | 7.7   | 8.0  | 7.0  |
| 2610203C22Rik  | 0.3   | 0.3  | 0.1  | 0.9  | 1.0  | 0.5   | 0.5  | 0.2   | 0.3   | 0.4   | 0.2  | 0.4  |
| 2610204G22Rik  | 0.9   | 1.5  | 0.9  | 1.1  | 0.5  | 1.2   | 0.7  | 0.9   | 1.1   | 0.8   | 0.2  | 0.8  |
| 2610301B20Rik  | 9.9   | 8.5  | 8.9  | 10.2 | 7.5  | 10.3  | 6.8  | 8.0   | 6.8   | 7.8   | 8.5  | 8.2  |
| 2610301G19Rik  | 6.4   | 5.7  | 6.1  | 5.6  | 6.0  | 6.1   | 6.1  | 6.7   | 5.8   | 5.4   | 5.1  | 4.6  |
| 2610305D13Rik  | 1.7   | 2.3  | 2.9  | 2.9  | 2.4  | 3.4   | 2.8  | 2.5   | 1.9   | 1.9   | 3.1  | 2.9  |
| 2610306M01Rik  | 2.7   | 2.9  | 2.0  | 1.7  | 2.2  | 2.6   | 2.1  | 1.7   | 1.9   | 2.5   | 2.8  | 2.8  |
| 2610307P16Rik  | 0.2   | 0.1  | 0.1  | 0.1  | 0.1  | 0.1   | 0.0  | 0.1   | 0.1   | 0.2   | 0.1  | 0.2  |
| 2610318N02Rik  | 0.0   | 0.0  | 0.0  | 0.1  | 0.3  | 0.0   | 0.1  | 0.0   | 0.0   | 0.0   | 0.0  | 0.0  |

Online Table 1

|                |       |      |      |      |      |      |      |      |      |      |      |      |
|----------------|-------|------|------|------|------|------|------|------|------|------|------|------|
| 2610507B11Rik  | 26.2  | 22.6 | 22.5 | 35.6 | 33.5 | 25.5 | 23.8 | 22.5 | 20.0 | 26.8 | 24.4 | 25.1 |
| 2610507I01Rik  | 2.2   | 2.5  | 2.6  | 3.1  | 2.2  | 3.4  | 1.8  | 2.8  | 1.8  | 1.8  | 2.1  | 1.9  |
| 2610524H06Rik  | 4.1   | 4.2  | 3.2  | 4.2  | 4.6  | 4.6  | 4.3  | 4.9  | 4.2  | 3.7  | 3.3  | 3.1  |
| 2610528A11Rik  | 0.1   | 0.1  | 0.0  | 0.5  | 0.1  | 0.1  | 0.1  | 0.0  | 0.0  | 0.0  | 0.1  | 0.0  |
| 2700029M09Rik  | 10.0  | 10.0 | 11.0 | 8.7  | 12.0 | 11.2 | 11.6 | 10.4 | 10.0 | 8.8  | 10.2 | 10.8 |
| 2700038G22Rik  | 0.1   | 0.1  | 0.2  | 0.1  | 0.3  | 0.1  | 0.3  | 0.1  | 0.1  | 0.1  | 0.2  | 0.2  |
| 2700046G09Rik  | 1.2   | 1.1  | 1.3  | 1.4  | 1.4  | 1.2  | 1.2  | 1.4  | 0.9  | 1.1  | 1.7  | 1.2  |
| 2700049A03Rik  | 2.4   | 3.2  | 3.5  | 2.1  | 2.6  | 2.3  | 2.6  | 2.9  | 2.5  | 2.3  | 2.5  | 2.7  |
| 2700050L05Rik  | 3.8   | 4.1  | 3.7  | 2.6  | 3.6  | 3.4  | 3.4  | 3.2  | 3.6  | 4.5  | 4.0  | 3.7  |
| 2700054A10Rik  | 0.2   | 0.3  | 0.2  | 0.1  | 0.2  | 0.2  | 0.1  | 0.2  | 0.1  | 0.2  | 0.2  | 0.2  |
| 2700060E02Rik  | 103.3 | 79.7 | 88.5 | 89.5 | 79.5 | 94.1 | 81.9 | 84.5 | 74.0 | 82.8 | 90.5 | 93.6 |
| 2700062C07Rik  | 7.9   | 8.2  | 7.8  | 9.7  | 6.2  | 8.6  | 7.7  | 10.8 | 9.4  | 8.8  | 10.1 | 7.3  |
| 2700069I18Rik  | 0.0   | 0.1  | 0.0  | 0.0  | 0.0  | 0.0  | 0.0  | 0.0  | 0.0  | 0.1  | 0.1  | 0.0  |
| 2700070H01Rik  | 0.6   | 0.2  | 0.4  | 0.3  | 0.3  | 0.5  | 0.2  | 0.0  | 0.1  | 0.1  | 0.1  | 0.2  |
| 2700081L22Rik  | 0.1   | 0.2  | 0.7  | 0.2  | 0.0  | 0.4  | 0.0  | 0.2  | 0.1  | 0.1  | 0.5  | 0.1  |
| 2700081O15Rik  | 2.2   | 2.2  | 2.6  | 1.4  | 1.6  | 2.5  | 2.7  | 4.7  | 5.1  | 3.9  | 3.4  | 2.9  |
| 2700089E24Rik  | 33.0  | 29.6 | 34.3 | 40.5 | 29.7 | 40.5 | 35.6 | 36.8 | 31.8 | 34.6 | 39.7 | 39.1 |
| 2700094K13Rik  | 4.7   | 5.8  | 6.0  | 3.3  | 6.3  | 6.9  | 6.2  | 4.9  | 6.3  | 7.1  | 5.5  | 5.9  |
| 2700097O09Rik  | 4.7   | 4.4  | 2.8  | 4.1  | 4.9  | 4.0  | 3.7  | 4.3  | 4.6  | 5.0  | 4.4  | 3.4  |
| 2700099C18Rik  | 0.7   | 1.9  | 2.1  | 0.7  | 1.7  | 0.2  | 1.7  | 0.4  | 1.7  | 0.6  | 0.8  | 0.6  |
| 2810001G20Rik  | 1.3   | 1.0  | 0.9  | 0.8  | 1.2  | 1.8  | 1.0  | 1.3  | 1.5  | 1.6  | 1.2  | 1.1  |
| 2810002D19Rik  | 1.9   | 1.6  | 2.6  | 2.1  | 2.5  | 3.0  | 2.3  | 3.1  | 2.0  | 2.7  | 3.3  | 2.8  |
| 2810004N23Rik  | 22.1  | 18.4 | 16.9 | 24.0 | 17.4 | 20.6 | 17.7 | 18.2 | 15.2 | 19.1 | 21.3 | 20.7 |
| 2810006K23Rik  | 4.7   | 5.4  | 6.1  | 5.1  | 5.2  | 5.2  | 4.6  | 5.8  | 4.1  | 4.8  | 6.2  | 5.7  |
| 2810008D09Rik  | 4.6   | 4.2  | 3.7  | 2.3  | 4.7  | 5.3  | 4.0  | 2.3  | 4.7  | 4.6  | 2.1  | 2.8  |
| 2810013P06Rik  | 2.5   | 2.3  | 2.0  | 3.0  | 2.6  | 3.7  | 2.1  | 2.6  | 2.9  | 4.3  | 2.4  | 2.8  |
| 2810021J22Rik  | 1.6   | 1.7  | 1.6  | 1.8  | 1.3  | 1.5  | 1.4  | 1.1  | 1.3  | 1.3  | 1.7  | 1.4  |
| 2810025M15Rik  | 6.0   | 4.8  | 4.8  | 6.5  | 5.4  | 6.6  | 5.8  | 5.7  | 5.8  | 6.8  | 5.4  | 5.8  |
| 2810029C07Rik  | 0.5   | 0.7  | 0.4  | 0.3  | 0.5  | 0.6  | 0.4  | 0.2  | 0.3  | 0.3  | 0.4  | 0.6  |
| 2810032G03Rik  | 2.0   | 2.3  | 1.9  | 1.6  | 1.0  | 1.9  | 0.9  | 0.9  | 0.6  | 0.9  | 0.9  | 1.2  |
| 2810047C21Rik1 | 4.6   | 3.4  | 3.4  | 4.8  | 4.1  | 4.3  | 2.9  | 3.1  | 4.3  | 1.9  | 2.6  | 2.8  |
| 2810055G20Rik  | 1.8   | 1.4  | 1.7  | 1.9  | 1.0  | 1.3  | 1.3  | 1.3  | 1.0  | 1.5  | 1.8  | 1.8  |
| 2810403A07Rik  | 12.9  | 14.0 | 13.6 | 14.1 | 13.9 | 14.0 | 14.0 | 12.4 | 13.6 | 12.4 | 12.9 | 13.0 |
| 2810403D21Rik  | 0.2   | 0.1  | 0.4  | 0.0  | 0.1  | 0.0  | 0.0  | 0.1  | 0.1  | 0.1  | 0.3  | 0.0  |
| 2810405F15Rik  | 0.0   | 0.1  | 0.1  | 0.0  | 0.0  | 0.0  | 0.0  | 0.0  | 0.0  | 0.4  | 0.0  | 0.1  |
| 2810407C02Rik  | 28.8  | 24.8 | 27.3 | 34.8 | 27.6 | 36.3 | 25.8 | 26.8 | 25.0 | 27.8 | 36.6 | 35.5 |
| 2810408A11Rik  | 0.9   | 0.6  | 0.7  | 0.7  | 0.5  | 0.6  | 0.2  | 0.6  | 0.5  | 0.5  | 0.6  | 0.9  |
| 2810408I11Rik  | 2.0   | 2.7  | 2.4  | 1.2  | 1.8  | 0.6  | 2.6  | 2.7  | 2.5  | 2.2  | 3.3  | 2.2  |
| 2810408M09Rik  | 4.1   | 3.8  | 3.5  | 3.7  | 4.3  | 4.0  | 3.8  | 3.6  | 3.8  | 4.1  | 4.1  | 3.9  |
| 2810410L24Rik  | 0.5   | 0.5  | 0.4  | 0.3  | 0.6  | 0.4  | 0.2  | 0.5  | 0.8  | 0.3  | 0.5  | 0.4  |
| 2810417H13Rik  | 2.6   | 4.8  | 9.8  | 0.8  | 7.9  | 1.1  | 8.3  | 4.5  | 6.5  | 4.0  | 6.6  | 4.4  |
| 2810428I15Rik  | 34.2  | 28.7 | 26.4 | 31.2 | 33.9 | 28.9 | 27.4 | 40.9 | 35.7 | 29.9 | 31.1 | 31.0 |
| 2810429I04Rik  | 0.0   | 0.1  | 0.1  | 0.0  | 0.0  | 0.0  | 0.2  | 0.2  | 0.1  | 0.0  | 0.0  | 0.0  |
| 2810433D01Rik  | 2.7   | 2.5  | 3.1  | 2.5  | 2.4  | 1.8  | 1.9  | 2.9  | 2.6  | 3.0  | 1.8  | 3.0  |
| 2810442I21Rik  | 0.0   | 0.0  | 0.1  | 0.0  | 0.0  | 0.0  | 0.1  | 0.0  | 0.0  | 0.0  | 0.1  | 0.0  |
| 2810442N19Rik  | 0.2   | 0.0  | 0.3  | 0.1  | 0.1  | 0.1  | 0.3  | 0.6  | 0.3  | 0.1  | 0.1  | 0.2  |
| 2810454H06Rik  | 0.3   | 0.6  | 0.5  | 0.3  | 0.5  | 0.4  | 0.5  | 0.8  | 0.5  | 0.4  | 0.5  | 0.5  |
| 2810459M11Rik  | 0.1   | 0.0  | 0.0  | 0.0  | 0.0  | 0.0  | 0.0  | 0.0  | 0.0  | 0.0  | 0.0  | 0.0  |
| 2810468N07Rik  | 1.0   | 1.0  | 0.5  | 0.9  | 0.9  | 1.4  | 0.8  | 0.7  | 0.7  | 0.5  | 0.7  | 0.5  |
| 2810474O19Rik  | 6.0   | 6.2  | 6.9  | 6.4  | 7.8  | 5.7  | 5.9  | 5.6  | 7.4  | 9.0  | 8.3  | 10.4 |
| 2900002K06Rik  | 0.8   | 0.4  | 0.9  | 0.5  | 0.6  | 0.6  | 0.6  | 0.7  | 1.0  | 0.2  | 0.6  | 1.1  |
| 2900005J15Rik  | 0.4   | 0.5  | 0.3  | 0.5  | 0.2  | 0.6  | 0.4  | 0.3  | 0.5  | 0.2  | 0.2  | 0.2  |
| 2900008C10Rik  | 0.1   | 0.0  | 0.1  | 0.0  | 0.1  | 0.0  | 0.1  | 0.0  | 0.1  | 0.1  | 0.0  | 0.0  |
| 2900009J06Rik  | 0.8   | 0.6  | 0.5  | 0.6  | 0.8  | 0.9  | 1.0  | 0.6  | 0.3  | 1.1  | 0.3  | 0.5  |
| 2900011O08Rik  | 0.1   | 0.0  | 0.0  | 0.0  | 0.0  | 0.0  | 0.0  | 0.0  | 0.0  | 0.0  | 0.0  | 0.0  |
| 2900026A02Rik  | 4.2   | 3.4  | 2.9  | 3.7  | 4.2  | 4.0  | 7.6  | 5.2  | 5.7  | 4.1  | 6.5  | 4.6  |
| 2900041M22Rik  | 1.0   | 0.9  | 0.7  | 0.4  | 0.6  | 1.0  | 0.5  | 0.5  | 0.4  | 0.3  | 0.4  | 0.5  |

Online Table 1

|               |      |      |      |      |      |      |      |      |      |      |      |      |
|---------------|------|------|------|------|------|------|------|------|------|------|------|------|
| 2900056M20Rik | 0.3  | 0.3  | 0.6  | 0.6  | 0.5  | 0.6  | 0.5  | 0.5  | 0.3  | 0.5  | 0.6  | 0.6  |
| 2900057B20Rik | 0.2  | 0.4  | 0.1  | 0.2  | 0.2  | 0.4  | 0.2  | 0.1  | 0.1  | 0.2  | 0.2  | 0.1  |
| 2900060B14Rik | 3.1  | 2.6  | 4.7  | 4.2  | 5.6  | 2.8  | 3.8  | 3.3  | 5.3  | 3.8  | 2.4  | 4.7  |
| 2900076A07Rik | 1.4  | 0.9  | 1.3  | 2.7  | 1.8  | 2.4  | 1.1  | 0.6  | 1.2  | 0.8  | 1.5  | 0.8  |
| 2900092C05Rik | 0.1  | 0.0  | 0.0  | 0.1  | 0.0  | 0.0  | 0.1  | 0.0  | 0.2  | 0.1  | 0.0  | 0.0  |
| 2900097C17Rik | 52.7 | 55.0 | 55.2 | 59.8 | 56.6 | 57.1 | 50.8 | 58.3 | 57.3 | 63.8 | 59.5 | 65.3 |
| 3000002C10Rik | 1.5  | 1.5  | 1.4  | 1.9  | 1.0  | 1.7  | 1.7  | 1.9  | 1.0  | 1.2  | 1.2  | 1.2  |
| 3010001F23Rik | 0.1  | 0.2  | 0.8  | 0.1  | 0.2  | 0.5  | 0.8  | 0.5  | 0.2  | 0.1  | 0.2  | 0.1  |
| 3010026O09Rik | 2.6  | 2.5  | 3.4  | 2.6  | 2.2  | 3.6  | 2.9  | 2.4  | 2.6  | 2.0  | 2.3  | 2.0  |
| 3100003L05Rik | 0.0  | 0.0  | 0.0  | 0.0  | 0.0  | 0.0  | 0.0  | 0.0  | 0.1  | 0.0  | 0.0  | 0.0  |
| 3110001D03Rik | 25.2 | 21.6 | 20.7 | 21.2 | 23.0 | 22.3 | 25.1 | 22.6 | 27.0 | 25.1 | 25.1 | 25.6 |
| 3110001I22Rik | 1.4  | 0.9  | 1.0  | 0.7  | 1.2  | 0.8  | 0.6  | 0.8  | 0.9  | 1.2  | 1.3  | 1.2  |
| 3110002H16Rik | 15.3 | 13.7 | 11.7 | 16.6 | 17.5 | 13.8 | 14.7 | 13.5 | 13.8 | 13.4 | 14.8 | 14.1 |
| 3110007F17Rik | 0.8  | 1.3  | 1.2  | 0.4  | 0.8  | 1.5  | 1.1  | 1.4  | 1.0  | 0.8  | 0.8  | 1.3  |
| 3110009E18Rik | 1.9  | 2.1  | 2.6  | 1.3  | 2.2  | 3.1  | 1.3  | 1.7  | 2.0  | 2.8  | 3.0  | 2.7  |
| 3110021A11Rik | 0.3  | 0.2  | 0.3  | 0.1  | 0.1  | 0.1  | 0.3  | 0.3  | 0.3  | 0.2  | 0.4  | 0.1  |
| 3110021N24Rik | 2.9  | 2.9  | 2.3  | 3.1  | 2.0  | 3.4  | 2.8  | 3.4  | 2.0  | 2.4  | 2.7  | 3.2  |
| 3110035E14Rik | 0.0  | 0.0  | 0.0  | 0.0  | 0.1  | 0.0  | 0.0  | 0.0  | 0.0  | 0.4  | 0.2  | 0.1  |
| 3110039I08Rik | 0.7  | 0.3  | 0.6  | 0.3  | 0.2  | 0.3  | 0.4  | 0.2  | 0.2  | 0.4  | 0.2  | 0.2  |
| 3110040N11Rik | 15.5 | 15.4 | 20.2 | 18.9 | 13.5 | 19.9 | 17.6 | 16.7 | 12.7 | 14.7 | 18.6 | 17.5 |
| 3110043O21Rik | 6.2  | 6.5  | 5.7  | 6.3  | 6.9  | 5.5  | 4.7  | 4.4  | 6.1  | 6.7  | 5.2  | 5.9  |
| 3110045C21Rik | 1.7  | 2.7  | 2.7  | 1.4  | 1.7  | 1.2  | 2.1  | 1.8  | 2.2  | 1.5  | 2.5  | 1.0  |
| 3110047P20Rik | 0.0  | 0.0  | 0.0  | 0.0  | 0.0  | 0.0  | 0.0  | 0.0  | 0.0  | 0.0  | 0.0  | 0.0  |
| 3110052M02Rik | 1.3  | 1.8  | 1.5  | 1.4  | 1.1  | 2.1  | 1.4  | 1.3  | 1.4  | 1.4  | 1.5  | 1.3  |
| 3110056K07Rik | 2.0  | 2.3  | 1.9  | 2.9  | 2.1  | 2.8  | 3.0  | 2.3  | 1.9  | 2.8  | 1.7  | 2.2  |
| 3110057O12Rik | 1.1  | 1.3  | 1.5  | 1.1  | 0.8  | 1.2  | 0.9  | 0.9  | 1.0  | 0.9  | 1.0  | 1.4  |
| 3110062M04Rik | 9.4  | 7.4  | 6.9  | 11.5 | 9.2  | 11.9 | 7.6  | 5.8  | 6.5  | 7.5  | 7.3  | 8.9  |
| 3110070M22Rik | 1.0  | 0.9  | 0.9  | 0.8  | 0.7  | 0.9  | 0.9  | 0.8  | 0.9  | 0.8  | 0.4  | 1.4  |
| 3110082I17Rik | 3.3  | 4.2  | 2.7  | 4.9  | 3.5  | 4.9  | 3.8  | 3.8  | 2.4  | 2.8  | 4.0  | 3.5  |
| 3110082J24Rik | 0.9  | 0.7  | 0.6  | 0.2  | 1.0  | 0.4  | 0.7  | 1.0  | 1.0  | 0.4  | 0.5  | 0.7  |
| 3200001D21Rik | 0.1  | 0.0  | 0.1  | 0.0  | 0.1  | 0.0  | 0.0  | 0.1  | 0.0  | 0.1  | 0.1  | 0.0  |
| 3230401D17Rik | 18.0 | 17.4 | 16.9 | 20.8 | 18.5 | 16.6 | 17.8 | 15.6 | 17.5 | 18.8 | 19.5 | 17.8 |
| 3300002I08Rik | 2.8  | 3.0  | 2.4  | 1.3  | 2.1  | 1.7  | 1.5  | 1.6  | 1.9  | 3.1  | 1.6  | 1.7  |
| 3300005D01Rik | 33.3 | 24.3 | 20.9 | 42.1 | 27.7 | 44.5 | 33.9 | 23.4 | 19.9 | 17.5 | 22.7 | 25.1 |
| 3425401B19Rik | 0.2  | 0.1  | 0.1  | 0.1  | 0.1  | 0.2  | 0.0  | 0.1  | 0.0  | 0.1  | 0.0  | 0.1  |
| 3632451O06Rik | 3.6  | 4.0  | 5.5  | 2.7  | 1.7  | 2.5  | 4.1  | 2.9  | 2.1  | 2.8  | 3.3  | 4.1  |
| 3632454L22Rik | 0.0  | 0.0  | 0.0  | 0.1  | 0.0  | 0.0  | 0.0  | 0.0  | 0.1  | 0.0  | 0.0  | 0.0  |
| 3830403N18Rik | 2.6  | 2.1  | 2.4  | 2.7  | 2.7  | 2.7  | 2.5  | 2.5  | 2.2  | 2.2  | 4.7  | 2.3  |
| 3830406C13Rik | 10.8 | 10.9 | 11.9 | 12.4 | 12.0 | 11.2 | 11.5 | 11.6 | 10.3 | 13.4 | 13.9 | 14.0 |
| 3830408C21Rik | 0.4  | 0.4  | 0.7  | 0.3  | 0.4  | 0.3  | 0.3  | 0.4  | 0.4  | 0.3  | 0.3  | 0.3  |
| 3930402G23Rik | 0.1  | 0.1  | 0.1  | 0.1  | 0.1  | 0.0  | 0.1  | 0.1  | 0.1  | 0.1  | 0.1  | 0.1  |
| 4430402I18Rik | 0.4  | 0.5  | 0.5  | 0.4  | 0.3  | 0.9  | 0.3  | 0.7  | 0.4  | 0.4  | 0.3  | 0.5  |
| 4632415K11Rik | 4.5  | 4.0  | 3.7  | 4.1  | 3.4  | 5.0  | 3.4  | 3.6  | 3.2  | 4.3  | 4.0  | 3.5  |
| 4632415L05Rik | 1.8  | 1.4  | 1.8  | 2.3  | 1.8  | 2.3  | 2.2  | 1.9  | 1.6  | 1.8  | 1.9  | 2.1  |
| 4632427E13Rik | 4.5  | 4.9  | 4.3  | 5.2  | 4.4  | 4.1  | 4.3  | 5.2  | 6.0  | 4.4  | 3.5  | 5.1  |
| 4632428C04Rik | 0.2  | 0.1  | 0.2  | 0.2  | 0.1  | 0.2  | 0.1  | 0.1  | 0.1  | 0.1  | 0.1  | 0.3  |
| 4632428N05Rik | 7.3  | 11.6 | 13.8 | 9.4  | 13.6 | 6.5  | 8.9  | 9.0  | 10.1 | 11.3 | 8.4  | 12.2 |
| 4632434I11Rik | 6.9  | 9.1  | 10.0 | 4.1  | 9.9  | 3.9  | 8.5  | 4.8  | 8.1  | 8.1  | 8.1  | 7.2  |
| 4732415M23Rik | 0.6  | 1.0  | 0.7  | 0.9  | 0.4  | 2.0  | 0.4  | 0.6  | 0.6  | 0.6  | 1.2  | 1.5  |
| 4732416N19Rik | 0.1  | 0.0  | 0.0  | 0.4  | 0.1  | 0.1  | 0.0  | 0.1  | 0.1  | 0.1  | 0.3  | 0.0  |
| 4732471J01Rik | 0.2  | 0.2  | 0.3  | 0.2  | 0.2  | 0.1  | 0.3  | 0.2  | 0.1  | 0.5  | 0.1  | 0.1  |
| 4732491K20Rik | 0.7  | 0.4  | 0.4  | 0.9  | 0.4  | 0.7  | 0.6  | 0.4  | 0.3  | 0.5  | 0.6  | 0.4  |
| 4831440E17Rik | 0.1  | 0.2  | 0.3  | 0.2  | 0.2  | 0.2  | 0.2  | 0.1  | 0.2  | 0.1  | 0.0  | 0.1  |
| 4833403I15Rik | 0.1  | 0.1  | 0.2  | 0.0  | 0.1  | 0.0  | 0.0  | 0.1  | 0.1  | 0.4  | 0.4  | 0.0  |
| 4833412C05Rik | 3.3  | 1.8  | 1.1  | 3.2  | 2.4  | 4.3  | 1.6  | 0.7  | 1.2  | 0.9  | 3.7  | 1.0  |
| 4833417C18Rik | 0.2  | 0.3  | 0.3  | 0.3  | 0.2  | 0.0  | 0.2  | 0.2  | 0.1  | 0.0  | 0.1  | 0.3  |
| 4833418N02Rik | 1.1  | 1.8  | 1.3  | 1.4  | 1.6  | 1.0  | 1.3  | 1.1  | 1.5  | 1.5  | 1.2  | 1.6  |

Online Table 1

|               |      |      |      |      |      |      |      |      |      |      |      |      |
|---------------|------|------|------|------|------|------|------|------|------|------|------|------|
| 4833419F23Rik | 0.9  | 0.8  | 1.3  | 2.0  | 1.0  | 1.2  | 1.4  | 1.5  | 1.1  | 0.8  | 1.4  | 1.2  |
| 4833420G17Rik | 8.0  | 9.7  | 9.1  | 8.8  | 8.0  | 8.7  | 7.1  | 7.9  | 7.8  | 8.5  | 8.3  | 8.0  |
| 4833422C13Rik | 0.9  | 0.7  | 1.3  | 1.0  | 1.4  | 0.5  | 1.0  | 1.0  | 1.2  | 1.1  | 0.8  | 1.0  |
| 4833427F10Rik | 0.0  | 0.0  | 0.0  | 0.0  | 0.0  | 0.0  | 0.0  | 0.0  | 0.0  | 0.1  | 0.1  | 0.0  |
| 4833427G06Rik | 3.2  | 3.2  | 2.6  | 1.2  | 2.1  | 2.6  | 1.0  | 1.1  | 1.5  | 1.8  | 0.9  | 2.2  |
| 4833439L19Rik | 53.0 | 48.4 | 39.6 | 59.6 | 44.7 | 56.7 | 42.7 | 37.7 | 39.9 | 38.6 | 43.2 | 39.7 |
| 4921507L20Rik | 0.1  | 0.1  | 0.1  | 0.0  | 0.1  | 0.0  | 0.2  | 0.1  | 0.0  | 0.2  | 0.1  | 0.0  |
| 4921507P07Rik | 0.0  | 0.1  | 0.1  | 0.1  | 0.0  | 0.1  | 0.0  | 0.1  | 0.0  | 0.1  | 0.1  | 0.1  |
| 4921508A21Rik | 0.3  | 0.5  | 0.1  | 0.4  | 0.4  | 0.3  | 0.2  | 0.4  | 0.4  | 0.4  | 0.1  | 0.1  |
| 4921511C10Rik | 0.1  | 0.1  | 0.1  | 0.0  | 0.1  | 0.1  | 0.0  | 0.2  | 0.0  | 0.1  | 0.1  | 0.0  |
| 4921511I17Rik | 0.0  | 0.1  | 0.0  | 0.1  | 0.0  | 0.1  | 0.0  | 0.1  | 0.1  | 0.2  | 0.0  | 0.0  |
| 4921513I03Rik | 0.0  | 0.1  | 0.0  | 0.0  | 0.0  | 0.1  | 0.0  | 0.1  | 0.1  | 0.1  | 0.2  | 0.1  |
| 4921524J17Rik | 15.6 | 13.5 | 19.2 | 13.7 | 14.1 | 12.1 | 14.1 | 11.9 | 13.0 | 16.4 | 17.9 | 20.3 |
| 4921525O09Rik | 0.0  | 0.0  | 0.0  | 0.0  | 0.0  | 0.0  | 0.0  | 0.0  | 0.1  | 0.0  | 0.0  | 0.0  |
| 4921530D09Rik | 0.0  | 0.1  | 0.0  | 0.0  | 0.1  | 0.1  | 0.0  | 0.0  | 0.0  | 0.0  | 0.0  | 0.0  |
| 4921530L18Rik | 0.5  | 0.5  | 0.2  | 0.9  | 0.6  | 0.7  | 0.8  | 0.7  | 0.8  | 0.5  | 0.7  | 0.5  |
| 4921531C22Rik | 1.5  | 1.5  | 1.3  | 1.5  | 1.3  | 1.3  | 1.1  | 1.8  | 1.1  | 1.2  | 1.7  | 1.7  |
| 4921536K21Rik | 0.4  | 0.3  | 0.3  | 0.5  | 0.3  | 0.3  | 0.3  | 0.1  | 0.1  | 0.1  | 0.4  | 0.1  |
| 4921539E11Rik | 0.0  | 0.0  | 0.0  | 0.0  | 0.0  | 0.0  | 0.0  | 0.0  | 0.0  | 0.0  | 0.0  | 0.0  |
| 4922501C03Rik | 5.0  | 5.2  | 6.5  | 6.4  | 5.3  | 5.2  | 5.1  | 5.1  | 3.9  | 3.5  | 5.8  | 5.3  |
| 4922501L14Rik | 0.0  | 0.0  | 0.0  | 0.0  | 0.0  | 0.0  | 0.0  | 0.0  | 0.0  | 0.0  | 0.0  | 0.1  |
| 4930402H24Rik | 17.7 | 14.1 | 12.8 | 19.4 | 18.8 | 15.0 | 16.7 | 13.3 | 15.4 | 14.4 | 16.8 | 14.2 |
| 4930404H11Rik | 0.1  | 0.1  | 0.0  | 0.0  | 0.0  | 0.0  | 0.1  | 0.0  | 0.0  | 0.1  | 0.0  | 0.0  |
| 4930404I05Rik | 0.1  | 0.0  | 0.1  | 0.5  | 0.1  | 0.0  | 0.1  | 0.1  | 0.1  | 0.1  | 0.1  | 0.4  |
| 4930404N11Rik | 0.8  | 1.5  | 1.6  | 1.1  | 1.9  | 0.8  | 1.4  | 0.9  | 1.3  | 1.2  | 0.9  | 1.3  |
| 4930405A21Rik | 0.4  | 0.3  | 0.3  | 0.2  | 0.3  | 0.1  | 0.4  | 0.1  | 0.2  | 0.2  | 0.1  | 0.3  |
| 4930405P13Rik | 0.1  | 0.0  | 0.0  | 0.2  | 0.1  | 0.1  | 0.0  | 0.0  | 0.0  | 0.1  | 0.0  | 0.0  |
| 4930412C18Rik | 0.4  | 0.6  | 0.6  | 0.5  | 0.3  | 0.5  | 0.4  | 0.5  | 0.5  | 0.4  | 0.5  | 0.4  |
| 4930413G21Rik | 1.5  | 1.5  | 1.5  | 1.0  | 1.5  | 1.2  | 1.6  | 1.9  | 2.1  | 2.5  | 1.1  | 1.6  |
| 4930414L22Rik | 3.0  | 3.1  | 2.4  | 3.3  | 3.2  | 3.1  | 3.3  | 3.0  | 3.5  | 4.1  | 2.5  | 2.7  |
| 4930414N06Rik | 0.7  | 0.7  | 0.9  | 0.0  | 1.3  | 0.7  | 0.6  | 0.7  | 0.8  | 0.6  | 0.2  | 0.4  |
| 4930415O20Rik | 0.1  | 0.1  | 0.1  | 0.1  | 0.1  | 0.0  | 0.0  | 0.2  | 0.0  | 0.2  | 0.0  | 0.0  |
| 4930422G04Rik | 1.0  | 1.4  | 2.1  | 0.7  | 1.8  | 0.9  | 1.9  | 1.0  | 1.4  | 0.8  | 1.7  | 1.3  |
| 4930426L09Rik | 0.2  | 0.4  | 0.3  | 0.4  | 0.3  | 0.4  | 0.6  | 0.2  | 0.8  | 0.6  | 0.5  | 0.7  |
| 4930427A07Rik | 0.8  | 1.5  | 1.7  | 0.4  | 1.9  | 0.3  | 2.5  | 1.0  | 1.7  | 1.0  | 1.4  | 0.7  |
| 4930429B21Rik | 1.2  | 0.7  | 0.8  | 1.5  | 1.4  | 1.5  | 1.7  | 1.2  | 1.4  | 1.8  | 2.3  | 1.5  |
| 4930429F24Rik | 0.2  | 0.1  | 0.1  | 0.1  | 0.1  | 0.0  | 0.1  | 0.2  | 0.1  | 0.0  | 0.1  | 0.1  |
| 4930430F08Rik | 4.2  | 4.3  | 5.0  | 5.0  | 3.8  | 5.7  | 3.6  | 3.1  | 3.2  | 4.1  | 4.4  | 4.5  |
| 4930431F12Rik | 0.1  | 0.1  | 0.1  | 0.0  | 0.1  | 0.1  | 0.1  | 0.1  | 0.1  | 0.1  | 0.1  | 0.0  |
| 4930431P03Rik | 0.0  | 0.0  | 0.0  | 0.0  | 0.0  | 0.0  | 0.0  | 0.0  | 0.0  | 0.0  | 0.0  | 0.0  |
| 4930432K21Rik | 0.3  | 0.4  | 0.4  | 0.3  | 0.2  | 0.3  | 0.2  | 0.2  | 0.1  | 0.1  | 0.3  | 0.2  |
| 4930441O14Rik | 0.2  | 0.2  | 0.3  | 0.1  | 0.2  | 0.2  | 0.2  | 0.2  | 0.2  | 0.2  | 0.2  | 0.1  |
| 4930443O20Rik | 0.2  | 0.3  | 0.2  | 0.0  | 0.1  | 0.3  | 0.4  | 0.5  | 0.3  | 0.3  | 0.1  | 0.3  |
| 4930444A02Rik | 7.4  | 6.5  | 5.0  | 8.2  | 6.0  | 8.1  | 5.9  | 6.4  | 5.6  | 6.2  | 6.8  | 6.4  |
| 4930444G20Rik | 0.0  | 0.0  | 0.0  | 0.2  | 0.0  | 0.0  | 0.0  | 0.0  | 0.0  | 0.0  | 0.0  | 0.0  |
| 4930447C04Rik | 0.1  | 0.1  | 0.1  | 0.3  | 0.0  | 0.3  | 0.1  | 0.0  | 0.0  | 0.0  | 0.2  | 0.2  |
| 4930447K03Rik | 0.1  | 0.1  | 0.3  | 0.0  | 0.2  | 0.2  | 0.2  | 0.2  | 0.1  | 0.0  | 0.1  | 0.0  |
| 4930447N08Rik | 0.1  | 0.1  | 0.0  | 0.0  | 0.0  | 0.0  | 0.0  | 0.0  | 0.0  | 0.0  | 0.1  | 0.0  |
| 4930451G09Rik | 0.3  | 0.2  | 0.2  | 0.1  | 0.2  | 0.4  | 0.2  | 0.2  | 0.1  | 0.2  | 0.1  | 0.3  |
| 4930452B06Rik | 0.7  | 0.5  | 0.7  | 0.3  | 0.7  | 1.0  | 0.7  | 0.3  | 0.4  | 0.3  | 0.5  | 0.4  |
| 4930453N24Rik | 26.2 | 22.1 | 24.8 | 26.0 | 21.5 | 22.9 | 22.8 | 22.0 | 20.4 | 23.0 | 27.2 | 24.6 |
| 4930455C13Rik | 6.5  | 5.7  | 4.2  | 7.0  | 4.7  | 8.7  | 7.2  | 5.1  | 4.7  | 5.2  | 7.0  | 5.3  |
| 4930455F23Rik | 10.4 | 6.9  | 6.2  | 10.2 | 5.7  | 10.9 | 6.1  | 6.2  | 4.9  | 5.8  | 7.4  | 6.9  |
| 4930465K10Rik | 0.0  | 0.0  | 0.0  | 0.1  | 0.0  | 0.0  | 0.1  | 0.1  | 0.0  | 0.2  | 0.1  | 0.1  |
| 4930467E23Rik | 0.2  | 0.2  | 0.2  | 0.0  | 0.1  | 0.1  | 0.2  | 0.0  | 0.0  | 0.1  | 0.0  | 0.2  |
| 4930470H14Rik | 6.9  | 9.7  | 8.5  | 7.3  | 7.9  | 7.1  | 9.1  | 6.1  | 5.1  | 7.5  | 6.6  | 7.5  |
| 4930471I20Rik | 0.0  | 0.0  | 0.1  | 0.1  | 0.2  | 0.1  | 0.0  | 0.3  | 0.1  | 0.0  | 0.0  | 0.0  |

Online Table 1

|               |     |     |     |     |     |     |     |     |     |     |     |     |
|---------------|-----|-----|-----|-----|-----|-----|-----|-----|-----|-----|-----|-----|
| 4930471M09Rik | 0.0 | 0.0 | 0.0 | 0.0 | 0.0 | 0.1 | 0.0 | 0.0 | 0.0 | 0.0 | 0.0 | 0.1 |
| 4930473A02Rik | 0.4 | 0.3 | 0.4 | 0.4 | 0.3 | 0.2 | 1.0 | 0.5 | 0.4 | 0.4 | 0.5 | 0.7 |
| 4930478L05Rik | 0.1 | 0.0 | 0.1 | 0.0 | 0.0 | 0.0 | 0.0 | 0.1 | 0.0 | 0.2 | 0.0 | 0.0 |
| 4930479D17Rik | 0.1 | 0.0 | 0.0 | 0.2 | 0.1 | 0.1 | 0.0 | 0.0 | 0.0 | 0.1 | 0.0 | 0.1 |
| 4930480G23Rik | 0.1 | 0.1 | 0.0 | 0.0 | 0.0 | 0.1 | 0.1 | 0.0 | 0.1 | 0.1 | 0.1 | 0.1 |
| 4930481A15Rik | 2.0 | 1.4 | 1.2 | 1.7 | 2.0 | 1.7 | 2.2 | 2.8 | 2.0 | 1.2 | 1.6 | 1.6 |
| 4930483J18Rik | 0.1 | 0.1 | 0.0 | 0.1 | 0.0 | 0.0 | 0.0 | 0.0 | 0.0 | 0.0 | 0.0 | 0.1 |
| 4930483K19Rik | 0.5 | 0.5 | 0.5 | 0.2 | 0.4 | 0.2 | 0.5 | 0.4 | 0.4 | 0.1 | 0.4 | 0.1 |
| 4930486L24Rik | 4.6 | 0.8 | 0.2 | 4.4 | 1.0 | 3.9 | 0.5 | 0.3 | 0.1 | 0.3 | 0.5 | 0.5 |
| 4930487H11Rik | 0.0 | 0.1 | 0.0 | 0.5 | 0.2 | 0.2 | 0.1 | 0.1 | 0.0 | 0.0 | 0.1 | 0.1 |
| 4930488L21Rik | 0.1 | 0.1 | 0.0 | 0.0 | 0.0 | 0.2 | 0.1 | 0.0 | 0.1 | 0.1 | 0.0 | 0.1 |
| 4930500J02Rik | 0.8 | 0.3 | 0.3 | 0.0 | 0.3 | 0.1 | 0.2 | 0.2 | 0.1 | 0.3 | 0.3 | 0.2 |
| 4930502A04Rik | 0.0 | 0.1 | 0.0 | 0.0 | 0.0 | 0.0 | 0.0 | 0.0 | 0.0 | 0.0 | 0.0 | 0.0 |
| 4930502E09Rik | 0.1 | 0.1 | 0.1 | 0.0 | 0.3 | 0.3 | 0.3 | 0.1 | 0.1 | 0.2 | 0.2 | 0.1 |
| 4930502E18Rik | 0.2 | 0.0 | 0.0 | 0.1 | 0.0 | 0.1 | 0.1 | 0.1 | 0.0 | 0.0 | 0.0 | 0.0 |
| 4930503B20Rik | 0.0 | 0.0 | 0.0 | 0.0 | 0.0 | 0.0 | 0.1 | 0.0 | 0.0 | 0.0 | 0.1 | 0.2 |
| 4930503L19Rik | 5.8 | 6.9 | 7.1 | 6.9 | 9.0 | 5.6 | 7.0 | 6.3 | 7.5 | 5.6 | 6.7 | 6.9 |
| 4930505A04Rik | 0.9 | 0.5 | 0.7 | 0.6 | 0.7 | 0.9 | 0.9 | 0.6 | 0.2 | 0.4 | 0.5 | 0.3 |
| 4930506C21Rik | 0.8 | 0.7 | 0.7 | 1.1 | 0.5 | 1.0 | 0.2 | 0.1 | 0.3 | 0.7 | 0.2 | 0.4 |
| 4930506M07Rik | 2.4 | 1.0 | 1.4 | 4.6 | 5.0 | 1.9 | 1.3 | 0.7 | 0.4 | 1.2 | 1.1 | 1.2 |
| 4930507D05Rik | 0.7 | 0.3 | 0.4 | 0.3 | 0.6 | 0.4 | 0.6 | 0.5 | 0.3 | 0.7 | 0.6 | 0.3 |
| 4930509E16Rik | 0.7 | 0.7 | 0.3 | 0.8 | 0.5 | 0.6 | 0.2 | 0.1 | 0.1 | 0.1 | 0.4 | 0.1 |
| 4930511M06Rik | 0.6 | 0.7 | 0.6 | 0.4 | 0.6 | 0.5 | 0.6 | 0.4 | 0.4 | 0.3 | 0.5 | 0.4 |
| 4930511M11Rik | 0.0 | 0.1 | 0.0 | 0.0 | 0.0 | 0.0 | 0.1 | 0.0 | 0.0 | 0.0 | 0.1 | 0.1 |
| 4930512B01Rik | 0.2 | 0.1 | 0.1 | 0.2 | 0.2 | 0.3 | 0.4 | 0.3 | 0.4 | 0.2 | 0.2 | 0.3 |
| 4930513N10Rik | 0.4 | 0.6 | 0.5 | 0.4 | 0.6 | 0.5 | 0.4 | 0.4 | 0.4 | 0.6 | 0.3 | 0.3 |
| 4930515G01Rik | 0.7 | 0.9 | 0.9 | 0.4 | 0.6 | 0.9 | 0.9 | 0.8 | 0.7 | 1.1 | 0.9 | 1.3 |
| 4930519F09Rik | 0.3 | 0.4 | 0.6 | 0.4 | 0.3 | 0.6 | 0.5 | 0.5 | 0.3 | 0.3 | 0.2 | 0.5 |
| 4930519G04Rik | 0.0 | 0.0 | 0.0 | 0.0 | 0.0 | 0.0 | 0.4 | 0.0 | 0.0 | 0.0 | 0.0 | 0.0 |
| 4930520O04Rik | 0.2 | 0.2 | 0.2 | 0.8 | 0.2 | 0.3 | 0.2 | 0.3 | 0.1 | 0.4 | 0.1 | 0.2 |
| 4930521E06Rik | 0.1 | 0.1 | 0.1 | 0.1 | 0.0 | 0.0 | 0.0 | 0.0 | 0.0 | 0.0 | 0.1 | 0.0 |
| 4930523C07Rik | 2.8 | 2.8 | 3.3 | 3.2 | 2.4 | 2.8 | 2.5 | 3.5 | 3.2 | 1.7 | 2.2 | 2.6 |
| 4930524L23Rik | 0.1 | 0.1 | 0.1 | 0.0 | 0.1 | 0.2 | 0.1 | 0.0 | 0.0 | 0.1 | 0.1 | 0.0 |
| 4930525G20Rik | 0.2 | 0.2 | 0.2 | 0.1 | 0.1 | 0.1 | 0.1 | 0.3 | 0.3 | 0.2 | 0.1 | 0.2 |
| 4930526I15Rik | 2.4 | 2.3 | 2.1 | 3.5 | 2.4 | 2.8 | 2.6 | 2.7 | 2.2 | 2.7 | 2.2 | 1.6 |
| 4930528A17Rik | 0.1 | 0.3 | 0.4 | 0.1 | 0.3 | 0.2 | 0.3 | 0.2 | 0.3 | 0.2 | 0.3 | 0.3 |
| 4930528D03Rik | 0.0 | 0.3 | 0.1 | 0.0 | 0.1 | 0.0 | 0.1 | 0.1 | 0.1 | 0.0 | 0.2 | 0.0 |
| 4930529C04Rik | 0.0 | 0.0 | 0.0 | 0.1 | 0.0 | 0.0 | 0.1 | 0.1 | 0.0 | 0.1 | 0.1 | 0.1 |
| 4930533B01Rik | 0.0 | 0.1 | 0.1 | 0.1 | 0.0 | 0.0 | 0.1 | 0.1 | 0.0 | 0.0 | 0.1 | 0.0 |
| 4930538K18Rik | 0.0 | 0.0 | 0.1 | 0.3 | 0.0 | 0.0 | 0.0 | 0.0 | 0.0 | 0.0 | 0.0 | 0.1 |
| 4930539E08Rik | 0.1 | 0.1 | 0.0 | 0.1 | 0.0 | 0.0 | 0.1 | 0.0 | 0.0 | 0.0 | 0.0 | 0.0 |
| 4930539J05Rik | 1.9 | 1.4 | 1.5 | 3.2 | 2.0 | 1.2 | 2.3 | 2.0 | 3.0 | 2.5 | 2.8 | 2.7 |
| 4930549G23Rik | 0.6 | 0.7 | 0.3 | 0.5 | 0.7 | 0.4 | 0.7 | 0.2 | 0.6 | 0.4 | 0.1 | 0.2 |
| 4930550C14Rik | 1.9 | 2.1 | 1.4 | 1.9 | 1.6 | 2.2 | 0.9 | 0.8 | 0.7 | 1.4 | 0.9 | 1.2 |
| 4930552P12Rik | 0.1 | 0.0 | 0.0 | 0.0 | 0.0 | 0.0 | 0.0 | 0.0 | 0.1 | 0.0 | 0.0 | 0.0 |
| 4930555G01Rik | 0.1 | 0.3 | 0.1 | 0.1 | 0.1 | 0.1 | 0.1 | 0.1 | 0.1 | 0.0 | 0.1 | 0.1 |
| 4930556M19Rik | 2.3 | 1.7 | 1.6 | 2.4 | 2.0 | 2.2 | 1.4 | 1.0 | 1.6 | 1.5 | 1.4 | 2.1 |
| 4930558J18Rik | 0.1 | 0.2 | 0.3 | 0.1 | 0.4 | 0.1 | 0.3 | 0.1 | 0.2 | 0.1 | 0.4 | 0.2 |
| 4930562C15Rik | 0.0 | 0.0 | 0.0 | 0.0 | 0.0 | 0.0 | 0.0 | 0.0 | 0.0 | 0.0 | 0.0 | 0.0 |
| 4930562F07Rik | 1.7 | 2.0 | 2.7 | 2.2 | 1.5 | 1.0 | 0.8 | 1.3 | 1.6 | 0.8 | 1.9 | 2.2 |
| 4930563D23Rik | 0.0 | 0.0 | 0.0 | 0.0 | 0.0 | 0.0 | 0.0 | 0.0 | 0.0 | 0.0 | 0.0 | 0.0 |
| 4930563E18Rik | 0.0 | 0.2 | 0.0 | 0.0 | 0.1 | 0.1 | 0.1 | 0.1 | 0.0 | 0.0 | 0.0 | 0.1 |
| 4930563E22Rik | 0.2 | 0.3 | 0.3 | 0.3 | 0.3 | 0.5 | 0.1 | 0.3 | 0.3 | 0.2 | 0.1 | 0.2 |
| 4930564C03Rik | 0.0 | 0.0 | 0.0 | 0.0 | 0.0 | 0.0 | 0.0 | 0.0 | 0.0 | 0.0 | 0.0 | 0.0 |
| 4930565N06Rik | 0.7 | 0.9 | 1.0 | 0.5 | 0.7 | 0.8 | 0.5 | 0.7 | 0.7 | 0.6 | 0.5 | 0.9 |
| 4930568K20Rik | 0.1 | 0.0 | 0.0 | 0.0 | 0.1 | 0.0 | 0.0 | 0.0 | 0.0 | 0.0 | 0.1 | 0.0 |
| 4930570G19Rik | 0.3 | 0.2 | 0.2 | 0.0 | 0.1 | 0.0 | 0.1 | 0.3 | 0.1 | 0.0 | 0.1 | 0.0 |

Online Table 1

|               |      |      |      |      |      |      |      |      |      |      |      |      |
|---------------|------|------|------|------|------|------|------|------|------|------|------|------|
| 4930577N17Rik | 0.6  | 0.7  | 0.7  | 1.2  | 1.0  | 0.8  | 0.9  | 1.1  | 0.8  | 1.0  | 0.8  | 0.8  |
| 4930578M01Rik | 0.3  | 0.6  | 0.2  | 0.4  | 0.3  | 0.8  | 0.6  | 0.3  | 0.3  | 0.1  | 0.3  | 0.3  |
| 4930579G18Rik | 0.4  | 0.3  | 0.2  | 0.3  | 0.5  | 0.7  | 0.3  | 0.5  | 0.2  | 0.6  | 0.4  | 0.3  |
| 4930579G24Rik | 1.7  | 2.2  | 3.3  | 1.3  | 3.7  | 2.1  | 4.3  | 2.4  | 3.8  | 2.1  | 2.8  | 2.0  |
| 4930579K19Rik | 0.5  | 0.2  | 0.4  | 0.4  | 0.6  | 0.5  | 0.4  | 0.4  | 0.6  | 0.3  | 0.4  | 0.4  |
| 4930581F22Rik | 0.8  | 0.9  | 0.8  | 0.6  | 0.8  | 0.9  | 0.5  | 1.0  | 0.7  | 0.7  | 0.8  | 0.6  |
| 4930590J08Rik | 0.0  | 0.0  | 0.0  | 0.0  | 0.0  | 0.0  | 0.0  | 0.0  | 0.0  | 0.0  | 0.0  | 0.0  |
| 4930592A05Rik | 5.2  | 5.9  | 3.7  | 3.2  | 3.8  | 5.5  | 3.2  | 1.9  | 3.2  | 4.3  | 4.1  | 2.9  |
| 4930592I03Rik | 0.1  | 0.1  | 0.2  | 0.1  | 0.3  | 0.2  | 0.2  | 0.2  | 0.1  | 0.3  | 0.1  | 0.5  |
| 4930594C11Rik | 0.1  | 0.1  | 0.1  | 0.0  | 0.2  | 0.1  | 0.1  | 0.0  | 0.0  | 0.0  | 0.1  | 0.0  |
| 4930599N23Rik | 0.6  | 0.2  | 0.3  | 0.1  | 0.4  | 0.3  | 0.3  | 0.7  | 0.2  | 0.5  | 0.3  | 0.3  |
| 4931402G19Rik | 0.1  | 0.2  | 0.1  | 0.0  | 0.2  | 0.1  | 0.1  | 0.2  | 0.1  | 0.1  | 0.1  | 0.1  |
| 4931403E22Rik | 0.3  | 0.0  | 0.1  | 0.0  | 0.2  | 0.0  | 0.0  | 0.0  | 0.1  | 0.0  | 0.1  | 0.1  |
| 4931403G20Rik | 0.2  | 0.4  | 0.3  | 0.2  | 0.3  | 0.2  | 0.4  | 0.1  | 0.4  | 0.3  | 0.3  | 0.2  |
| 4931406C07Rik | 4.0  | 4.5  | 4.0  | 3.3  | 4.3  | 4.6  | 3.8  | 4.2  | 3.9  | 4.4  | 4.3  | 5.2  |
| 4931406H21Rik | 0.2  | 0.2  | 0.2  | 0.2  | 0.3  | 0.1  | 0.3  | 0.3  | 0.2  | 0.2  | 0.2  | 0.2  |
| 4931406P16Rik | 15.6 | 20.1 | 20.3 | 14.6 | 17.8 | 13.7 | 21.7 | 30.5 | 29.8 | 17.9 | 21.8 | 22.9 |
| 4931408D14Rik | 0.3  | 0.2  | 0.3  | 0.1  | 0.3  | 0.3  | 0.1  | 0.3  | 0.2  | 0.2  | 0.3  | 0.2  |
| 4931414P19Rik | 0.8  | 1.3  | 1.5  | 0.9  | 1.1  | 1.2  | 0.8  | 1.3  | 1.3  | 1.5  | 1.2  | 1.1  |
| 4931417G12Rik | 0.1  | 0.1  | 0.0  | 0.0  | 0.2  | 0.0  | 0.0  | 0.1  | 0.1  | 0.0  | 0.1  | 0.1  |
| 4931428F04Rik | 1.4  | 1.3  | 1.6  | 2.0  | 1.6  | 1.8  | 1.7  | 1.7  | 1.7  | 1.1  | 1.9  | 1.9  |
| 4931430N09Rik | 0.0  | 0.0  | 0.0  | 0.0  | 0.1  | 0.0  | 0.0  | 0.0  | 0.0  | 0.0  | 0.0  | 0.0  |
| 4931431C16Rik | 0.2  | 0.2  | 0.3  | 0.2  | 0.3  | 0.3  | 0.2  | 0.1  | 0.1  | 0.2  | 0.2  | 0.1  |
| 4931440F15Rik | 0.1  | 0.1  | 0.1  | 0.2  | 0.1  | 0.1  | 0.1  | 0.1  | 0.1  | 0.1  | 0.1  | 0.1  |
| 4931440L10Rik | 0.0  | 0.0  | 0.0  | 0.0  | 0.0  | 0.0  | 0.1  | 0.0  | 0.0  | 0.1  | 0.0  | 0.0  |
| 4931440P22Rik | 0.2  | 0.2  | 0.1  | 0.2  | 0.1  | 0.4  | 0.1  | 0.2  | 0.2  | 0.2  | 0.1  | 0.1  |
| 4932413F04Rik | 0.0  | 0.0  | 0.0  | 0.0  | 0.0  | 0.0  | 0.0  | 0.0  | 0.0  | 0.1  | 0.0  | 0.1  |
| 4932415G12Rik | 2.3  | 2.5  | 2.5  | 2.3  | 2.5  | 2.9  | 1.8  | 1.9  | 2.3  | 1.7  | 2.0  | 2.0  |
| 4932416H05Rik | 0.7  | 0.7  | 0.8  | 0.6  | 0.8  | 0.7  | 0.6  | 1.1  | 0.6  | 0.7  | 0.7  | 0.9  |
| 4932418E24Rik | 0.0  | 0.1  | 0.1  | 0.0  | 0.1  | 0.0  | 0.1  | 0.0  | 0.0  | 0.0  | 0.0  | 0.0  |
| 4932435O22Rik | 0.0  | 0.0  | 0.0  | 0.1  | 0.0  | 0.0  | 0.0  | 0.0  | 0.0  | 0.0  | 0.0  | 0.0  |
| 4932438A13Rik | 6.7  | 7.3  | 6.4  | 7.1  | 6.3  | 6.6  | 5.5  | 5.8  | 5.1  | 5.0  | 5.6  | 5.4  |
| 4932438H23Rik | 0.0  | 0.1  | 0.0  | 0.0  | 0.1  | 0.1  | 0.0  | 0.0  | 0.0  | 0.1  | 0.0  | 0.0  |
| 4932441J04Rik | 0.0  | 0.1  | 0.2  | 0.0  | 0.0  | 0.2  | 0.0  | 0.2  | 0.1  | 0.0  | 0.0  | 0.2  |
| 4933400A11Rik | 0.4  | 0.7  | 0.6  | 0.2  | 0.2  | 0.2  | 0.4  | 0.2  | 0.4  | 0.2  | 0.0  | 0.1  |
| 4933400F21Rik | 0.1  | 0.0  | 0.1  | 0.0  | 0.0  | 0.0  | 0.0  | 0.1  | 0.0  | 0.1  | 0.0  | 0.1  |
| 4933402D24Rik | 0.0  | 0.0  | 0.1  | 0.1  | 0.0  | 0.0  | 0.0  | 0.0  | 0.0  | 0.0  | 0.0  | 0.0  |
| 4933402N22Rik | 0.1  | 0.1  | 0.0  | 0.0  | 0.1  | 0.0  | 0.1  | 0.3  | 0.0  | 0.0  | 0.0  | 0.0  |
| 4933403G14Rik | 1.6  | 1.4  | 1.8  | 1.8  | 1.3  | 1.4  | 1.0  | 1.7  | 1.4  | 1.5  | 1.6  | 1.8  |
| 4933404K08Rik | 0.0  | 0.0  | 0.1  | 0.0  | 0.0  | 0.1  | 0.0  | 0.0  | 0.0  | 0.0  | 0.0  | 0.0  |
| 4933404O12Rik | 0.3  | 0.5  | 0.7  | 0.4  | 0.5  | 0.5  | 0.6  | 0.5  | 0.8  | 0.7  | 0.4  | 0.5  |
| 4933405D12Rik | 0.1  | 0.5  | 0.5  | 0.3  | 0.2  | 0.1  | 0.0  | 0.2  | 0.3  | 0.1  | 0.1  | 0.3  |
| 4933405L10Rik | 0.0  | 0.0  | 0.1  | 0.0  | 0.1  | 0.0  | 0.0  | 0.1  | 0.0  | 0.1  | 0.0  | 0.0  |
| 4933406C10Rik | 0.1  | 0.2  | 0.2  | 0.1  | 0.1  | 0.2  | 0.0  | 0.0  | 0.0  | 0.1  | 0.1  | 0.2  |
| 4933406I18Rik | 0.1  | 0.1  | 0.1  | 0.0  | 0.1  | 0.1  | 0.1  | 0.1  | 0.0  | 0.0  | 0.1  | 0.1  |
| 4933406M09Rik | 0.0  | 0.0  | 0.0  | 0.0  | 0.0  | 0.0  | 0.0  | 0.0  | 0.0  | 0.0  | 0.0  | 0.1  |
| 4933407E24Rik | 0.0  | 0.1  | 0.0  | 0.0  | 0.1  | 0.0  | 0.0  | 0.0  | 0.0  | 0.0  | 0.0  | 0.0  |
| 4933407K13Rik | 0.6  | 0.7  | 0.7  | 0.8  | 0.7  | 0.4  | 0.6  | 0.8  | 0.7  | 0.6  | 0.6  | 0.6  |
| 4933408B17Rik | 0.1  | 0.1  | 0.2  | 0.0  | 0.2  | 0.1  | 0.1  | 0.0  | 0.1  | 0.1  | 0.1  | 0.1  |
| 4933408J17Rik | 0.4  | 0.4  | 0.3  | 0.3  | 0.4  | 0.4  | 0.4  | 0.4  | 0.6  | 0.4  | 0.2  | 0.4  |
| 4933408N05Rik | 0.0  | 0.0  | 0.0  | 0.0  | 0.1  | 0.0  | 0.0  | 0.0  | 0.0  | 0.1  | 0.0  | 0.0  |
| 4933409K07Rik | 4.8  | 4.8  | 4.0  | 4.6  | 4.5  | 4.1  | 3.9  | 4.1  | 3.4  | 3.1  | 3.9  | 3.6  |
| 4933411E08Rik | 0.0  | 0.1  | 0.1  | 0.1  | 0.0  | 0.1  | 0.1  | 0.1  | 0.0  | 0.0  | 0.2  | 0.1  |
| 4933411G11Rik | 0.0  | 0.0  | 0.0  | 0.0  | 0.0  | 0.0  | 0.1  | 0.1  | 0.0  | 0.0  | 0.0  | 0.0  |
| 4933411K16Rik | 0.2  | 0.1  | 0.3  | 0.2  | 0.2  | 0.3  | 0.3  | 0.2  | 0.2  | 0.1  | 0.2  | 0.2  |
| 4933411K20Rik | 5.3  | 6.3  | 7.2  | 5.9  | 4.8  | 5.9  | 5.1  | 5.7  | 4.9  | 5.6  | 5.8  | 5.9  |
| 4933412E12Rik | 8.2  | 6.9  | 8.2  | 9.1  | 6.8  | 7.5  | 6.7  | 6.0  | 5.9  | 4.6  | 5.7  | 5.4  |

Online Table 1



|               |      |      |      |      |      |      |      |      |      |      |      |      |
|---------------|------|------|------|------|------|------|------|------|------|------|------|------|
| 4933412O06Rik | 0.2  | 0.0  | 0.0  | 0.0  | 0.1  | 0.1  | 0.1  | 0.1  | 0.0  | 0.0  | 0.0  | 0.0  |
| 4933413J09Rik | 0.0  | 0.0  | 0.0  | 0.0  | 0.1  | 0.0  | 0.1  | 0.0  | 0.0  | 0.0  | 0.0  | 0.0  |
| 4933416M07Rik | 0.3  | 0.3  | 0.3  | 0.4  | 0.5  | 0.4  | 0.1  | 0.2  | 0.2  | 0.7  | 0.2  | 0.4  |
| 4933417D19Rik | 0.3  | 0.1  | 0.1  | 0.5  | 0.3  | 0.6  | 0.3  | 0.1  | 0.2  | 0.2  | 0.2  | 0.5  |
| 4933417E11Rik | 0.0  | 0.0  | 0.0  | 0.1  | 0.0  | 0.0  | 0.0  | 0.0  | 0.1  | 0.0  | 0.0  | 0.0  |
| 4933417G07Rik | 0.0  | 0.1  | 0.0  | 0.1  | 0.1  | 0.0  | 0.1  | 0.1  | 0.0  | 0.1  | 0.0  | 0.0  |
| 4933417O13Rik | 0.0  | 0.1  | 0.0  | 0.1  | 0.0  | 0.0  | 0.1  | 0.1  | 0.0  | 0.1  | 0.0  | 0.0  |
| 4933421O10Rik | 1.3  | 1.6  | 1.5  | 2.0  | 1.5  | 1.5  | 1.5  | 1.7  | 1.1  | 1.3  | 1.5  | 1.6  |
| 4933422A05Rik | 0.0  | 0.0  | 0.0  | 0.0  | 0.0  | 0.0  | 0.0  | 0.0  | 0.0  | 0.0  | 0.0  | 0.0  |
| 4933424G05Rik | 0.0  | 0.1  | 0.0  | 0.0  | 0.0  | 0.0  | 0.0  | 0.0  | 0.0  | 0.0  | 0.0  | 0.0  |
| 4933424G06Rik | 0.1  | 0.0  | 0.1  | 0.2  | 0.1  | 0.1  | 0.1  | 0.2  | 0.1  | 0.0  | 0.1  | 0.0  |
| 4933425H06Rik | 0.3  | 0.2  | 0.1  | 0.0  | 0.1  | 0.1  | 0.1  | 0.1  | 0.0  | 0.0  | 0.1  | 0.2  |
| 4933426D04Rik | 0.1  | 0.0  | 0.0  | 0.1  | 0.0  | 0.0  | 0.0  | 0.0  | 0.0  | 0.2  | 0.0  | 0.0  |
| 4933426M11Rik | 42.3 | 56.4 | 63.3 | 39.3 | 57.7 | 37.3 | 68.7 | 55.9 | 66.8 | 47.0 | 47.3 | 58.1 |
| 4933427D06Rik | 0.0  | 0.0  | 0.0  | 0.0  | 0.0  | 0.0  | 0.0  | 0.0  | 0.0  | 0.0  | 0.0  | 0.0  |
| 4933427D14Rik | 2.4  | 2.2  | 2.3  | 2.9  | 2.1  | 2.5  | 2.0  | 2.2  | 2.1  | 2.3  | 2.6  | 2.2  |
| 4933427E11Rik | 0.3  | 0.1  | 0.2  | 0.0  | 0.1  | 0.1  | 0.1  | 0.2  | 0.2  | 0.2  | 0.2  | 0.1  |
| 4933427G17Rik | 0.6  | 0.7  | 0.6  | 0.6  | 0.6  | 0.9  | 0.5  | 0.1  | 0.2  | 0.4  | 0.5  | 0.5  |
| 4933430I17Rik | 0.1  | 0.2  | 0.3  | 0.1  | 0.2  | 0.1  | 0.1  | 0.2  | 0.1  | 0.0  | 0.2  | 0.2  |
| 4933431E20Rik | 2.6  | 3.1  | 3.2  | 2.4  | 2.3  | 3.0  | 2.2  | 3.0  | 2.0  | 1.9  | 2.3  | 1.7  |
| 4933431G14Rik | 0.0  | 0.0  | 0.1  | 0.1  | 0.1  | 0.1  | 0.0  | 0.0  | 0.1  | 0.0  | 0.0  | 0.2  |
| 4933432I09Rik | 0.0  | 0.0  | 0.0  | 0.2  | 0.0  | 0.0  | 0.0  | 0.0  | 0.0  | 0.1  | 0.0  | 0.0  |
| 4933433G15Rik | 0.2  | 0.2  | 0.3  | 0.1  | 0.5  | 0.2  | 0.3  | 0.3  | 0.4  | 0.2  | 0.4  | 0.2  |
| 4933433G19Rik | 0.2  | 0.2  | 0.1  | 0.2  | 0.3  | 0.0  | 0.1  | 0.3  | 0.1  | 0.4  | 0.0  | 0.1  |
| 4933433H22Rik | 0.1  | 0.1  | 0.1  | 0.1  | 0.1  | 0.1  | 0.1  | 0.0  | 0.0  | 0.0  | 0.1  | 0.0  |
| 4933434E20Rik | 36.5 | 30.2 | 23.9 | 35.4 | 28.9 | 37.2 | 27.8 | 23.1 | 25.2 | 31.0 | 25.6 | 28.8 |
| 4933436C20Rik | 0.5  | 0.5  | 0.3  | 0.8  | 0.6  | 0.2  | 0.6  | 0.4  | 0.5  | 0.4  | 0.4  | 0.7  |
| 4933439C10Rik | 2.1  | 2.0  | 2.8  | 1.7  | 2.2  | 1.9  | 2.1  | 1.9  | 3.2  | 1.9  | 1.7  | 2.0  |
| 4933439K11Rik | 0.1  | 0.2  | 0.1  | 0.2  | 0.4  | 0.0  | 0.2  | 0.1  | 0.0  | 0.2  | 0.4  | 0.0  |
| 4933440M02Rik | 0.0  | 0.0  | 0.0  | 0.0  | 0.0  | 0.0  | 0.0  | 0.0  | 0.0  | 0.0  | 0.0  | 0.0  |
| 5031410I06Rik | 0.3  | 0.4  | 0.4  | 0.2  | 0.2  | 0.3  | 0.1  | 0.1  | 0.1  | 0.4  | 0.2  | 0.2  |
| 5031414D18Rik | 0.1  | 0.1  | 0.0  | 0.4  | 0.9  | 0.2  | 0.2  | 0.1  | 0.1  | 0.3  | 0.2  | 0.1  |
| 5031425E22Rik | 2.6  | 3.5  | 2.0  | 1.9  | 3.3  | 2.6  | 3.6  | 2.9  | 3.0  | 3.5  | 2.9  | 3.0  |
| 5031426D15Rik | 0.2  | 0.5  | 0.4  | 0.1  | 0.2  | 0.3  | 0.4  | 0.2  | 0.3  | 0.2  | 0.2  | 0.1  |
| 5031434C07Rik | 0.1  | 0.2  | 0.3  | 0.1  | 0.1  | 0.1  | 0.2  | 0.2  | 0.2  | 0.1  | 0.2  | 0.1  |
| 5031434O11Rik | 0.2  | 0.1  | 0.1  | 0.1  | 0.0  | 0.7  | 0.0  | 0.2  | 0.1  | 0.1  | 0.3  | 0.2  |
| 5031439G07Rik | 10.2 | 8.0  | 7.8  | 11.1 | 13.8 | 8.6  | 9.6  | 7.6  | 8.2  | 8.4  | 8.5  | 7.8  |
| 5033406O09Rik | 2.8  | 2.7  | 1.7  | 5.0  | 3.2  | 5.6  | 2.3  | 1.1  | 2.1  | 1.6  | 1.9  | 1.6  |
| 5033411D12Rik | 1.7  | 1.3  | 1.0  | 0.7  | 0.8  | 1.4  | 0.6  | 0.7  | 0.7  | 1.3  | 0.9  | 0.9  |
| 5330411J11Rik | 0.0  | 0.0  | 0.0  | 0.0  | 0.0  | 0.0  | 0.0  | 0.0  | 0.0  | 0.1  | 0.0  | 0.0  |
| 5330417C22Rik | 0.0  | 0.0  | 0.0  | 0.0  | 0.0  | 0.0  | 0.0  | 0.0  | 0.0  | 0.0  | 0.0  | 0.0  |
| 5330426P16Rik | 4.4  | 4.5  | 4.7  | 6.3  | 5.2  | 5.3  | 6.3  | 3.9  | 4.7  | 4.1  | 4.1  | 4.4  |
| 5430402O13Rik | 0.3  | 0.4  | 0.5  | 0.6  | 0.2  | 0.5  | 0.4  | 0.1  | 0.3  | 0.5  | 0.3  | 0.2  |
| 5430403N17Rik | 0.2  | 0.1  | 0.0  | 0.1  | 0.1  | 0.0  | 0.1  | 0.2  | 0.1  | 0.1  | 0.1  | 0.0  |
| 5430405H02Rik | 1.6  | 2.3  | 1.6  | 3.2  | 1.7  | 2.0  | 1.8  | 1.4  | 1.8  | 1.9  | 1.9  | 1.6  |
| 5430416N02Rik | 4.8  | 4.4  | 4.6  | 4.9  | 4.4  | 4.8  | 4.8  | 4.1  | 4.4  | 4.3  | 4.0  | 3.1  |
| 5430416O09Rik | 1.1  | 0.8  | 0.6  | 1.3  | 0.8  | 1.7  | 0.4  | 0.3  | 0.3  | 0.4  | 0.4  | 0.3  |
| 5430417L22Rik | 16.6 | 26.0 | 28.0 | 15.6 | 18.2 | 19.4 | 20.1 | 26.1 | 26.5 | 16.8 | 18.8 | 23.0 |
| 5430419D17Rik | 0.0  | 0.0  | 0.0  | 0.0  | 0.0  | 0.0  | 0.0  | 0.0  | 0.0  | 0.0  | 0.0  | 0.0  |
| 5430421F17Rik | 0.0  | 0.1  | 0.0  | 0.1  | 0.1  | 0.0  | 0.0  | 0.1  | 0.0  | 0.0  | 0.1  | 0.0  |
| 5430427O19Rik | 0.2  | 0.3  | 0.2  | 0.8  | 0.9  | 0.3  | 0.1  | 0.2  | 0.1  | 0.1  | 0.2  | 0.2  |
| 5430435G22Rik | 14.6 | 10.4 | 10.1 | 19.3 | 17.6 | 15.0 | 12.1 | 9.9  | 8.1  | 10.0 | 12.1 | 11.0 |
| 5430437J10Rik | 0.0  | 0.1  | 0.0  | 0.2  | 1.1  | 0.0  | 0.0  | 0.0  | 0.0  | 0.1  | 0.1  | 0.0  |
| 5530601H04Rik | 0.7  | 0.6  | 0.7  | 0.7  | 0.5  | 0.8  | 0.7  | 0.6  | 0.7  | 0.6  | 0.5  | 0.6  |
| 5730405O15Rik | 0.7  | 0.9  | 0.8  | 0.5  | 0.6  | 1.3  | 0.8  | 0.7  | 0.5  | 0.7  | 0.6  | 0.4  |
| 5730408K05Rik | 12.0 | 15.9 | 16.5 | 6.5  | 14.3 | 10.6 | 8.7  | 15.1 | 23.1 | 14.9 | 9.7  | 14.0 |
| 5730409E04Rik | 20.6 | 16.5 | 15.1 | 24.8 | 17.3 | 23.6 | 18.2 | 14.5 | 13.9 | 14.9 | 16.0 | 15.1 |

Online Table 1

|               |      |      |      |      |      |      |      |      |      |      |      |      |
|---------------|------|------|------|------|------|------|------|------|------|------|------|------|
| 5730416F02Rik | 0.1  | 0.0  | 0.0  | 0.1  | 0.1  | 0.0  | 0.1  | 0.1  | 0.1  | 0.0  | 0.0  | 0.0  |
| 5730422E09Rik | 0.0  | 0.1  | 0.0  | 0.0  | 0.1  | 0.0  | 0.0  | 0.0  | 0.1  | 0.1  | 0.0  | 0.1  |
| 5730455P16Rik | 7.3  | 7.3  | 8.2  | 6.8  | 5.4  | 8.8  | 5.8  | 7.0  | 6.0  | 6.5  | 7.0  | 7.5  |
| 5730480H06Rik | 0.2  | 0.2  | 0.2  | 0.1  | 0.0  | 0.3  | 0.2  | 0.1  | 0.1  | 0.2  | 0.2  | 0.2  |
| 5730507C01Rik | 2.6  | 2.9  | 3.0  | 2.7  | 2.9  | 2.6  | 3.1  | 3.1  | 2.9  | 3.6  | 3.5  | 3.0  |
| 5730508B09Rik | 1.2  | 1.0  | 1.5  | 0.7  | 1.4  | 0.7  | 0.8  | 0.6  | 1.0  | 0.7  | 1.2  | 1.5  |
| 5730559C18Rik | 0.2  | 0.1  | 0.1  | 0.1  | 0.5  | 0.2  | 0.5  | 0.4  | 0.5  | 0.4  | 0.3  | 0.1  |
| 5730577I03Rik | 0.7  | 1.1  | 0.8  | 0.5  | 0.5  | 0.8  | 0.5  | 0.6  | 0.5  | 0.9  | 0.9  | 0.6  |
| 5830403L16Rik | 0.0  | 0.0  | 0.0  | 0.1  | 0.0  | 0.0  | 0.1  | 0.0  | 0.1  | 0.0  | 0.0  | 0.0  |
| 5830415F09Rik | 1.6  | 1.1  | 1.6  | 1.7  | 1.2  | 1.4  | 1.5  | 1.4  | 1.7  | 1.5  | 1.9  | 1.3  |
| 5830416P10Rik | 0.0  | 0.0  | 0.0  | 0.0  | 0.0  | 0.0  | 0.0  | 0.0  | 0.0  | 0.2  | 0.0  | 0.0  |
| 5830417I10Rik | 3.9  | 4.7  | 4.7  | 4.0  | 4.2  | 4.4  | 4.1  | 4.9  | 4.2  | 4.3  | 4.3  | 4.3  |
| 5830418K08Rik | 2.4  | 3.3  | 3.4  | 2.4  | 2.7  | 2.4  | 3.5  | 2.9  | 2.7  | 2.5  | 2.9  | 2.9  |
| 5830418P13Rik | 0.1  | 0.0  | 0.0  | 0.0  | 0.1  | 0.1  | 0.1  | 0.0  | 0.0  | 0.2  | 0.1  | 0.0  |
| 5830432E09Rik | 0.3  | 0.1  | 0.2  | 0.9  | 0.7  | 0.4  | 0.5  | 0.2  | 0.2  | 0.3  | 0.1  | 0.1  |
| 5830454E08Rik | 0.4  | 0.2  | 0.3  | 0.8  | 0.6  | 0.6  | 0.3  | 0.4  | 0.3  | 0.2  | 0.3  | 0.2  |
| 5830473C10Rik | 0.0  | 0.0  | 0.0  | 0.0  | 0.0  | 0.0  | 0.0  | 0.0  | 0.0  | 0.0  | 0.0  | 0.0  |
| 5930403L14Rik | 0.0  | 0.0  | 0.0  | 0.0  | 0.0  | 0.0  | 0.0  | 0.0  | 0.0  | 0.0  | 0.0  | 0.0  |
| 6030407O03Rik | 0.1  | 0.0  | 0.0  | 0.0  | 0.0  | 0.0  | 0.0  | 0.0  | 0.0  | 0.0  | 0.0  | 0.1  |
| 6030408B16Rik | 0.2  | 0.3  | 0.7  | 0.1  | 0.4  | 0.1  | 0.3  | 0.6  | 0.3  | 0.1  | 0.1  | 0.2  |
| 6030419C18Rik | 13.4 | 9.8  | 9.0  | 16.4 | 11.3 | 16.4 | 13.2 | 8.0  | 10.7 | 14.3 | 11.6 | 11.0 |
| 6030458C11Rik | 3.7  | 3.4  | 4.5  | 4.3  | 4.3  | 3.8  | 4.2  | 4.5  | 3.9  | 3.8  | 4.3  | 3.6  |
| 6030466F02Rik | 0.0  | 0.0  | 0.0  | 0.0  | 0.0  | 0.0  | 0.0  | 0.0  | 0.0  | 0.1  | 0.0  | 0.1  |
| 6030468B19Rik | 0.0  | 0.0  | 0.1  | 0.0  | 0.0  | 0.0  | 0.0  | 0.0  | 0.1  | 0.0  | 0.1  | 0.0  |
| 6030498E09Rik | 0.0  | 0.0  | 0.0  | 0.0  | 0.0  | 0.0  | 0.0  | 0.0  | 0.0  | 0.0  | 0.0  | 0.0  |
| 6230400D17Rik | 0.2  | 0.3  | 0.3  | 0.3  | 0.4  | 0.3  | 0.6  | 0.5  | 0.6  | 0.7  | 0.4  | 0.6  |
| 6330403A02Rik | 0.0  | 0.0  | 0.0  | 0.0  | 0.0  | 0.0  | 0.0  | 0.0  | 0.1  | 0.0  | 0.0  | 0.0  |
| 6330403K07Rik | 0.2  | 0.2  | 0.2  | 0.1  | 0.1  | 0.3  | 0.0  | 0.0  | 0.1  | 0.2  | 0.0  | 0.2  |
| 6330403M23Rik | 1.6  | 2.0  | 2.3  | 2.4  | 1.3  | 3.1  | 1.3  | 1.4  | 1.7  | 2.2  | 2.5  | 1.8  |
| 6330407A03Rik | 0.0  | 0.0  | 0.0  | 0.0  | 0.1  | 0.1  | 0.1  | 0.0  | 0.0  | 0.0  | 0.0  | 0.0  |
| 6330408A02Rik | 3.2  | 3.0  | 2.9  | 4.0  | 2.4  | 4.4  | 2.7  | 2.5  | 1.8  | 2.3  | 2.2  | 2.8  |
| 6330409D20Rik | 0.1  | 0.0  | 0.0  | 0.1  | 0.1  | 0.0  | 0.1  | 0.0  | 0.1  | 0.0  | 0.0  | 0.0  |
| 6330416G13Rik | 1.9  | 2.0  | 1.8  | 2.1  | 1.9  | 1.9  | 2.2  | 2.1  | 2.3  | 1.4  | 2.0  | 1.7  |
| 6330418K02Rik | 1.3  | 0.7  | 1.5  | 1.2  | 1.4  | 1.2  | 1.4  | 1.1  | 1.3  | 1.3  | 0.7  | 1.4  |
| 6330549D23Rik | 0.2  | 0.2  | 0.4  | 0.3  | 0.2  | 0.2  | 0.3  | 0.1  | 0.2  | 0.2  | 0.1  | 0.3  |
| 6430411K18Rik | 1.5  | 0.8  | 0.5  | 0.7  | 0.9  | 1.3  | 1.2  | 1.5  | 1.7  | 1.9  | 1.3  | 1.7  |
| 6430531B16Rik | 0.3  | 0.7  | 0.2  | 0.1  | 0.3  | 0.5  | 0.1  | 0.3  | 0.2  | 0.1  | 0.1  | 0.1  |
| 6430548M08Rik | 1.6  | 1.7  | 1.5  | 2.3  | 2.7  | 1.5  | 1.4  | 1.6  | 1.5  | 1.9  | 1.7  | 1.7  |
| 6430550D23Rik | 0.2  | 0.5  | 0.3  | 0.2  | 0.2  | 0.2  | 0.2  | 0.3  | 0.1  | 0.2  | 0.2  | 0.1  |
| 6430562O15Rik | 0.8  | 0.9  | 0.8  | 1.0  | 0.6  | 1.0  | 0.4  | 0.9  | 1.0  | 0.8  | 0.7  | 0.7  |
| 6430571L13Rik | 0.2  | 0.2  | 0.1  | 0.1  | 0.1  | 0.4  | 0.0  | 0.1  | 0.0  | 0.0  | 0.1  | 0.1  |
| 6430573F11Rik | 0.1  | 0.1  | 0.0  | 0.0  | 0.0  | 0.1  | 0.0  | 0.0  | 0.0  | 0.0  | 0.0  | 0.0  |
| 6430584L05Rik | 0.7  | 0.7  | 0.5  | 0.4  | 0.5  | 0.3  | 0.4  | 0.5  | 0.2  | 0.4  | 0.5  | 0.4  |
| 6430706D22Rik | 7.3  | 9.9  | 12.1 | 5.9  | 12.7 | 5.5  | 14.0 | 9.7  | 14.5 | 7.2  | 9.2  | 7.9  |
| 6530402F18Rik | 1.4  | 1.1  | 0.9  | 1.5  | 1.2  | 1.3  | 1.4  | 1.2  | 1.3  | 1.2  | 1.0  | 0.9  |
| 6720401G13Rik | 2.4  | 2.4  | 2.0  | 2.2  | 2.0  | 3.0  | 2.3  | 2.3  | 2.7  | 2.1  | 2.0  | 2.1  |
| 6720456H20Rik | 7.3  | 7.6  | 7.5  | 6.5  | 7.0  | 6.5  | 7.3  | 8.7  | 7.8  | 7.8  | 7.6  | 8.0  |
| 6720468P15Rik | 0.0  | 0.1  | 0.0  | 0.2  | 0.0  | 0.0  | 0.1  | 0.0  | 0.0  | 0.1  | 0.1  | 0.0  |
| 6720483E21Rik | 0.1  | 0.0  | 0.0  | 0.0  | 0.1  | 0.2  | 0.0  | 0.0  | 0.1  | 0.0  | 0.0  | 0.1  |
| 6720489N17Rik | 0.9  | 0.9  | 1.4  | 0.7  | 1.2  | 1.4  | 1.0  | 1.1  | 1.0  | 0.9  | 1.2  | 1.0  |
| 6820408C15Rik | 0.1  | 0.0  | 0.0  | 0.1  | 0.0  | 0.0  | 0.0  | 0.0  | 0.1  | 0.2  | 0.1  | 0.1  |
| 6820431F20Rik | 24.8 | 29.8 | 35.3 | 33.8 | 29.1 | 33.7 | 32.6 | 33.1 | 32.0 | 26.2 | 33.8 | 29.9 |
| 7420700N18Rik | 0.1  | 0.0  | 0.0  | 0.0  | 0.0  | 0.0  | 0.0  | 0.0  | 0.0  | 0.0  | 0.0  | 0.0  |
| 7530420F21Rik | 0.1  | 0.2  | 0.3  | 0.2  | 0.0  | 0.0  | 0.1  | 0.3  | 0.2  | 0.0  | 0.3  | 0.2  |
| 8030423F21Rik | 0.0  | 0.0  | 0.0  | 0.0  | 0.0  | 0.0  | 0.0  | 0.0  | 0.0  | 0.0  | 0.0  | 0.0  |
| 8030442B05Rik | 0.1  | 0.1  | 0.1  | 0.1  | 0.1  | 0.0  | 0.2  | 0.2  | 0.2  | 0.4  | 0.3  | 0.2  |
| 8030462N17Rik | 5.9  | 6.3  | 6.1  | 6.2  | 5.1  | 6.0  | 6.4  | 5.2  | 5.8  | 5.1  | 6.2  | 6.2  |

Online Table 1

|               |      |      |      |      |      |      |      |      |      |      |      |      |
|---------------|------|------|------|------|------|------|------|------|------|------|------|------|
| 8430403D17Rik | 0.0  | 0.1  | 0.1  | 0.0  | 0.0  | 0.0  | 0.0  | 0.0  | 0.0  | 0.0  | 0.0  | 0.1  |
| 8430408G22Rik | 0.1  | 0.0  | 0.1  | 0.2  | 0.2  | 0.0  | 0.2  | 0.2  | 0.2  | 0.3  | 0.0  | 0.0  |
| 8430410A17Rik | 10.0 | 8.1  | 5.7  | 7.6  | 6.3  | 8.0  | 7.1  | 6.6  | 7.4  | 6.7  | 6.6  | 6.9  |
| 8430419L09Rik | 2.3  | 3.0  | 3.0  | 2.1  | 3.0  | 2.6  | 2.4  | 3.0  | 2.6  | 2.3  | 2.5  | 2.0  |
| 8430423G03Rik | 1.0  | 0.8  | 0.1  | 1.0  | 0.6  | 1.0  | 0.6  | 0.4  | 0.4  | 0.5  | 0.9  | 0.6  |
| 8430427H17Rik | 0.5  | 0.8  | 0.7  | 0.5  | 0.6  | 0.4  | 0.5  | 0.5  | 0.4  | 0.5  | 0.5  | 0.5  |
| 8430429K09Rik | 1.8  | 1.4  | 1.7  | 2.7  | 1.9  | 1.8  | 1.5  | 2.5  | 1.7  | 2.2  | 2.2  | 1.8  |
| 8430431K14Rik | 0.1  | 0.5  | 0.3  | 0.1  | 0.2  | 0.1  | 0.4  | 0.1  | 0.2  | 0.2  | 0.1  | 0.1  |
| 8430436N08Rik | 0.0  | 0.0  | 0.0  | 0.0  | 0.0  | 0.0  | 0.0  | 0.0  | 0.0  | 0.0  | 0.1  | 0.0  |
| 9030025P20Rik | 2.3  | 2.3  | 2.2  | 2.1  | 2.0  | 2.6  | 1.9  | 2.2  | 2.1  | 1.9  | 1.9  | 2.3  |
| 9030612E09Rik | 0.1  | 0.1  | 0.1  | 0.0  | 0.1  | 0.1  | 0.1  | 0.2  | 0.1  | 0.1  | 0.1  | 0.0  |
| 9030617O03Rik | 15.9 | 16.2 | 15.3 | 17.7 | 16.6 | 19.1 | 14.7 | 10.9 | 13.3 | 18.7 | 17.0 | 14.7 |
| 9030624G23Rik | 3.1  | 3.1  | 2.1  | 2.4  | 2.5  | 3.5  | 2.1  | 2.6  | 2.4  | 2.4  | 2.3  | 2.5  |
| 9030624J02Rik | 32.6 | 28.2 | 24.9 | 32.1 | 27.8 | 34.7 | 24.9 | 27.7 | 23.5 | 26.3 | 26.1 | 25.2 |
| 9130008F23Rik | 2.8  | 2.2  | 2.3  | 1.7  | 2.0  | 2.4  | 2.3  | 1.3  | 2.3  | 2.3  | 1.9  | 2.3  |
| 9130011E15Rik | 4.3  | 3.4  | 3.0  | 4.8  | 3.3  | 3.6  | 3.8  | 3.9  | 3.7  | 3.4  | 4.0  | 3.8  |
| 9130015A21Rik | 0.2  | 0.2  | 0.1  | 0.2  | 0.1  | 0.2  | 0.1  | 0.1  | 0.0  | 0.2  | 0.1  | 0.1  |
| 9130017N09Rik | 0.1  | 0.1  | 0.1  | 0.1  | 0.0  | 0.2  | 0.1  | 0.1  | 0.0  | 0.0  | 0.1  | 0.1  |
| 9130019O22Rik | 1.3  | 1.3  | 1.2  | 1.3  | 1.5  | 1.1  | 1.5  | 1.5  | 1.5  | 1.2  | 1.4  | 1.5  |
| 9130019P16Rik | 0.0  | 0.0  | 0.0  | 0.0  | 0.0  | 0.0  | 0.0  | 0.0  | 0.0  | 0.0  | 0.0  | 0.0  |
| 9130023H24Rik | 2.7  | 2.6  | 2.7  | 2.5  | 2.7  | 2.9  | 2.7  | 3.6  | 3.1  | 2.5  | 2.7  | 2.8  |
| 9130024F11Rik | 0.0  | 0.0  | 0.1  | 0.0  | 0.1  | 0.1  | 0.0  | 0.1  | 0.1  | 0.1  | 0.1  | 0.0  |
| 9130206I24Rik | 0.4  | 0.4  | 0.5  | 0.3  | 0.5  | 0.4  | 0.7  | 0.7  | 0.6  | 0.7  | 0.5  | 0.5  |
| 9130221F21Rik | 0.0  | 0.0  | 0.0  | 0.0  | 0.0  | 0.0  | 0.0  | 0.0  | 0.0  | 0.0  | 0.0  | 0.0  |
| 9130221H12Rik | 5.7  | 6.1  | 7.5  | 6.7  | 6.3  | 6.1  | 6.8  | 6.3  | 5.3  | 6.3  | 6.4  | 7.1  |
| 9130401M01Rik | 26.3 | 21.2 | 20.1 | 24.0 | 19.7 | 23.4 | 20.8 | 21.6 | 18.3 | 20.1 | 19.4 | 22.4 |
| 9130409I23Rik | 0.1  | 0.0  | 0.0  | 0.1  | 0.0  | 0.1  | 0.1  | 0.1  | 0.0  | 0.0  | 0.0  | 0.0  |
| 9230110C19Rik | 8.4  | 7.4  | 5.4  | 5.4  | 6.4  | 6.6  | 3.4  | 5.3  | 4.2  | 6.5  | 5.9  | 6.2  |
| 9230112J17Rik | 0.0  | 0.0  | 0.1  | 0.0  | 0.0  | 0.0  | 0.0  | 0.0  | 0.0  | 0.0  | 0.0  | 0.1  |
| 9230114K14Rik | 7.7  | 6.6  | 6.6  | 7.4  | 6.1  | 6.2  | 7.4  | 5.5  | 6.3  | 7.3  | 7.1  | 8.2  |
| 9230115E21Rik | 0.1  | 0.1  | 0.2  | 0.0  | 0.1  | 0.0  | 0.3  | 0.1  | 0.2  | 0.1  | 0.1  | 0.1  |
| 9230116N13Rik | 0.1  | 0.1  | 0.2  | 0.1  | 0.1  | 0.1  | 0.0  | 0.1  | 0.1  | 0.1  | 0.2  | 0.3  |
| 9330020H09Rik | 0.5  | 0.6  | 0.5  | 0.6  | 0.5  | 0.5  | 0.7  | 0.3  | 0.4  | 0.5  | 0.5  | 0.4  |
| 9330111N05Rik | 0.0  | 0.0  | 0.0  | 0.0  | 0.0  | 0.0  | 0.0  | 0.0  | 0.0  | 0.0  | 0.0  | 0.0  |
| 9330117O12Rik | 0.0  | 0.0  | 0.1  | 0.0  | 0.0  | 0.0  | 0.0  | 0.0  | 0.0  | 0.0  | 0.0  | 0.0  |
| 9330133O14Rik | 0.6  | 0.5  | 0.4  | 0.4  | 0.4  | 0.7  | 0.5  | 0.6  | 0.4  | 0.5  | 0.6  | 0.5  |
| 9330151L19Rik | 1.2  | 1.2  | 1.2  | 0.8  | 1.2  | 1.2  | 1.2  | 1.0  | 1.0  | 1.2  | 1.1  | 1.3  |
| 9330159F19Rik | 0.1  | 0.0  | 0.0  | 0.0  | 0.0  | 0.0  | 0.0  | 0.0  | 0.0  | 0.0  | 0.0  | 0.0  |
| 9330159M07Rik | 1.3  | 1.7  | 1.3  | 0.9  | 1.2  | 1.6  | 1.1  | 1.6  | 1.4  | 1.2  | 1.3  | 1.3  |
| 9330175E14Rik | 0.2  | 0.2  | 0.1  | 0.1  | 0.2  | 0.1  | 0.1  | 0.1  | 0.0  | 0.0  | 0.1  | 0.0  |
| 9330175M20Rik | 0.0  | 0.0  | 0.0  | 0.1  | 0.0  | 0.0  | 0.0  | 0.0  | 0.0  | 0.0  | 0.0  | 0.0  |
| 9330179D12Rik | 0.4  | 0.4  | 0.2  | 0.2  | 0.2  | 0.5  | 0.3  | 0.4  | 0.2  | 0.4  | 0.3  | 0.3  |
| 9330182L06Rik | 0.2  | 0.1  | 0.0  | 0.2  | 0.1  | 0.2  | 0.1  | 0.1  | 0.1  | 2.3  | 1.0  | 0.3  |
| 9430008C03Rik | 1.8  | 1.9  | 1.7  | 1.8  | 1.6  | 2.0  | 1.7  | 1.3  | 1.7  | 1.8  | 2.3  | 1.5  |
| 9430015G10Rik | 2.1  | 2.3  | 2.7  | 1.8  | 2.4  | 1.7  | 3.1  | 2.1  | 2.6  | 2.2  | 2.4  | 1.9  |
| 9430016H08Rik | 7.7  | 7.2  | 5.9  | 7.1  | 6.3  | 5.9  | 6.5  | 6.8  | 6.4  | 7.1  | 7.4  | 7.8  |
| 9430018G01Rik | 0.1  | 0.1  | 0.1  | 0.0  | 0.1  | 0.1  | 0.0  | 0.1  | 0.1  | 0.2  | 0.2  | 0.0  |
| 9430020K01Rik | 29.5 | 23.4 | 18.2 | 40.4 | 19.7 | 37.4 | 20.2 | 15.9 | 14.9 | 14.4 | 19.2 | 17.5 |
| 9430023L20Rik | 15.5 | 15.3 | 11.9 | 15.5 | 14.9 | 15.2 | 13.9 | 13.8 | 13.4 | 15.9 | 12.5 | 10.8 |
| 9430037G07Rik | 1.9  | 2.1  | 1.6  | 1.8  | 1.7  | 2.0  | 1.4  | 1.8  | 1.9  | 1.5  | 1.8  | 1.8  |
| 9430038I01Rik | 1.5  | 1.1  | 1.4  | 1.7  | 1.6  | 1.1  | 1.7  | 2.5  | 1.7  | 1.6  | 1.8  | 2.0  |
| 9430041J12Rik | 0.0  | 0.0  | 0.0  | 0.0  | 0.0  | 0.0  | 0.0  | 0.0  | 0.0  | 0.0  | 0.0  | 0.0  |
| 9430060I03Rik | 0.1  | 0.1  | 0.2  | 0.1  | 0.3  | 0.3  | 0.1  | 0.3  | 0.3  | 0.1  | 0.3  | 0.3  |
| 9430076C15Rik | 0.1  | 0.0  | 0.0  | 0.2  | 0.1  | 0.0  | 0.0  | 0.0  | 0.0  | 0.1  | 0.0  | 0.0  |
| 9430083A17Rik | 0.1  | 0.1  | 0.1  | 0.1  | 0.1  | 0.1  | 0.1  | 0.1  | 0.1  | 0.1  | 0.1  | 0.1  |
| 9430091E24Rik | 0.2  | 0.4  | 0.3  | 0.0  | 0.3  | 0.2  | 0.2  | 0.5  | 0.3  | 0.3  | 0.3  | 0.3  |
| 9530026F06Rik | 0.0  | 0.0  | 0.0  | 0.0  | 0.1  | 0.0  | 0.0  | 0.1  | 0.0  | 0.1  | 0.0  | 0.0  |

Online Table 1

|                |       |       |       |       |       |       |       |       |       |       |       |       |
|----------------|-------|-------|-------|-------|-------|-------|-------|-------|-------|-------|-------|-------|
| 9530026P05Rik  | 0.4   | 0.7   | 0.3   | 0.3   | 0.3   | 0.1   | 0.3   | 0.2   | 0.3   | 0.9   | 0.4   | 0.6   |
| 9530027J09Rik  | 2.0   | 1.4   | 1.6   | 1.5   | 1.6   | 1.6   | 1.4   | 1.6   | 1.0   | 1.0   | 1.8   | 1.5   |
| 9530051G07Rik  | 0.3   | 0.2   | 0.2   | 0.1   | 0.2   | 0.3   | 0.0   | 0.2   | 0.1   | 0.2   | 0.1   | 0.2   |
| 9530052E02Rik  | 0.0   | 0.1   | 0.0   | 0.1   | 0.1   | 0.1   | 0.0   | 0.2   | 0.0   | 0.1   | 0.0   | 0.0   |
| 9530053A07Rik  | 0.3   | 0.3   | 0.3   | 0.4   | 0.4   | 0.4   | 0.2   | 0.2   | 0.1   | 0.2   | 0.2   | 0.2   |
| 9530059O14Rik  | 0.0   | 0.0   | 0.0   | 0.0   | 0.0   | 0.0   | 0.0   | 0.0   | 0.0   | 0.0   | 0.0   | 0.0   |
| 9530068E07Rik  | 126.9 | 111.6 | 108.9 | 142.7 | 130.6 | 136.0 | 116.0 | 104.6 | 110.4 | 120.1 | 117.3 | 113.8 |
| 9530077C05Rik  | 0.7   | 0.3   | 0.5   | 0.3   | 0.3   | 0.6   | 0.4   | 0.3   | 0.3   | 0.4   | 0.7   | 0.4   |
| 9530082P21Rik  | 4.2   | 4.8   | 4.4   | 5.4   | 4.3   | 5.1   | 4.4   | 4.5   | 4.4   | 4.1   | 5.1   | 3.8   |
| 9530091C08Rik  | 0.4   | 0.7   | 0.7   | 0.4   | 0.5   | 0.5   | 0.9   | 0.4   | 0.3   | 0.4   | 0.4   | 0.3   |
| 9630028B13Rik  | 0.1   | 0.1   | 0.0   | 0.0   | 0.1   | 0.0   | 0.0   | 0.0   | 0.1   | 0.0   | 0.1   | 0.0   |
| 9630028H03Rik  | 0.0   | 0.0   | 0.0   | 0.0   | 0.0   | 0.1   | 0.0   | 0.0   | 0.0   | 0.0   | 0.0   | 0.0   |
| 9630033F20Rik  | 3.4   | 3.5   | 3.4   | 4.1   | 3.1   | 3.7   | 2.8   | 3.1   | 2.7   | 2.8   | 2.7   | 3.1   |
| 9830001H06Rik  | 2.4   | 2.7   | 2.6   | 2.4   | 2.9   | 2.4   | 3.2   | 2.3   | 2.6   | 2.4   | 2.2   | 2.1   |
| 9830132P13Rik  | 0.0   | 0.0   | 0.0   | 0.0   | 0.0   | 0.0   | 0.0   | 0.0   | 0.0   | 0.0   | 0.0   | 0.0   |
| 9830147E19Rik  | 1.4   | 1.6   | 2.0   | 1.2   | 1.1   | 1.5   | 1.3   | 1.3   | 1.3   | 1.7   | 1.5   | 1.8   |
| 9930012K11Rik  | 4.0   | 7.4   | 5.7   | 2.9   | 3.5   | 4.0   | 5.3   | 8.8   | 7.0   | 10.7  | 7.5   | 7.1   |
| 9930013L23Rik  | 583.9 | 669.6 | 851.5 | 418.3 | 535.7 | 464.0 | 689.2 | 878.4 | 834.1 | 461.6 | 629.6 | 690.1 |
| 9930014A18Rik  | 1.1   | 0.7   | 0.5   | 1.1   | 0.8   | 1.3   | 0.8   | 0.5   | 0.4   | 1.0   | 0.8   | 0.9   |
| 9930021J03Rik  | 3.5   | 4.7   | 4.5   | 3.8   | 3.7   | 3.6   | 3.7   | 3.6   | 3.6   | 3.8   | 4.2   | 4.0   |
| 9930104L06Rik  | 3.4   | 2.5   | 2.6   | 3.6   | 2.9   | 3.1   | 3.2   | 2.6   | 2.6   | 3.0   | 3.1   | 2.6   |
| 9930111J21Rik1 | 63.6  | 45.5  | 28.7  | 64.5  | 39.0  | 55.5  | 42.9  | 18.2  | 25.1  | 26.2  | 39.1  | 34.1  |
| 9930111J21Rik2 | 34.6  | 26.2  | 14.8  | 32.1  | 22.3  | 30.7  | 21.3  | 9.1   | 14.0  | 15.0  | 20.8  | 16.9  |
| A030009H04Rik  | 0.5   | 0.5   | 0.6   | 0.8   | 0.4   | 0.9   | 0.3   | 0.5   | 0.3   | 0.8   | 0.4   | 0.7   |
| A130010J15Rik  | 1.2   | 1.5   | 1.5   | 1.0   | 1.0   | 1.0   | 0.9   | 1.6   | 1.6   | 1.5   | 1.1   | 1.2   |
| A130049A11Rik  | 0.9   | 1.1   | 1.7   | 1.1   | 1.0   | 1.4   | 1.3   | 1.1   | 1.2   | 1.3   | 1.8   | 1.1   |
| A130077B15Rik  | 5.7   | 9.5   | 7.2   | 4.7   | 6.7   | 5.5   | 7.1   | 5.3   | 5.3   | 7.3   | 5.2   | 5.3   |
| A230020J21Rik  | 0.6   | 0.6   | 0.6   | 1.0   | 0.9   | 0.3   | 0.9   | 0.6   | 0.8   | 1.0   | 0.6   | 0.5   |
| A230028O05Rik  | 0.0   | 0.0   | 0.0   | 0.2   | 0.2   | 0.0   | 0.0   | 0.0   | 0.0   | 0.0   | 0.0   | 0.0   |
| A230046K03Rik  | 21.5  | 21.3  | 21.7  | 23.4  | 22.0  | 24.2  | 19.0  | 18.7  | 20.4  | 19.7  | 23.8  | 23.0  |
| A230050P20Rik  | 0.9   | 1.2   | 1.9   | 1.2   | 1.2   | 1.6   | 1.2   | 1.6   | 1.2   | 1.2   | 0.9   | 1.1   |
| A230056J06Rik  | 0.0   | 0.0   | 0.0   | 0.0   | 0.0   | 0.0   | 0.0   | 0.0   | 0.0   | 0.0   | 0.0   | 0.0   |
| A230056P14Rik  | 1.2   | 1.2   | 1.2   | 1.7   | 1.0   | 1.5   | 0.9   | 1.0   | 0.9   | 1.4   | 1.8   | 1.1   |
| A230057D06Rik  | 0.2   | 0.2   | 0.2   | 0.1   | 0.1   | 0.3   | 0.0   | 0.2   | 0.1   | 0.3   | 0.1   | 0.1   |
| A230065H16Rik  | 0.1   | 0.1   | 0.0   | 0.1   | 0.0   | 0.2   | 0.1   | 0.0   | 0.0   | 0.3   | 0.0   | 0.2   |
| A230070E04Rik  | 0.2   | 0.0   | 0.0   | 0.1   | 0.1   | 0.1   | 0.1   | 0.0   | 0.1   | 0.2   | 0.0   | 0.0   |
| A230072C01Rik  | 1.2   | 1.8   | 2.1   | 1.7   | 1.8   | 1.9   | 1.7   | 2.0   | 1.4   | 1.7   | 1.7   | 1.8   |
| A230072E10Rik  | 0.1   | 0.0   | 0.0   | 0.0   | 0.1   | 0.1   | 0.1   | 0.1   | 0.0   | 0.1   | 0.1   | 0.1   |
| A230073K19Rik  | 0.4   | 0.5   | 0.6   | 0.7   | 0.5   | 0.4   | 0.5   | 0.4   | 0.5   | 0.7   | 0.6   | 0.7   |
| A230108P19Rik  | 0.0   | 0.0   | 0.0   | 0.0   | 0.0   | 0.0   | 0.0   | 0.0   | 0.0   | 0.0   | 0.0   | 0.0   |
| A2m            | 0.1   | 0.0   | 0.1   | 0.0   | 0.0   | 0.0   | 0.0   | 0.1   | 0.0   | 0.0   | 0.0   | 0.0   |
| A330009N23Rik  | 0.6   | 0.5   | 0.5   | 0.5   | 0.3   | 0.5   | 0.8   | 0.6   | 0.5   | 0.3   | 0.6   | 0.2   |
| A330021E22Rik  | 0.8   | 1.0   | 0.8   | 0.5   | 0.8   | 1.1   | 0.8   | 0.8   | 0.9   | 1.3   | 1.1   | 1.0   |
| A330023F24Rik  | 1.0   | 0.9   | 0.8   | 1.1   | 1.1   | 1.0   | 0.7   | 0.7   | 0.6   | 0.6   | 0.7   | 0.8   |
| A330032B11Rik  | 0.0   | 0.1   | 0.1   | 0.0   | 0.0   | 0.1   | 0.1   | 0.1   | 0.1   | 0.1   | 0.2   | 0.0   |
| A330035P11Rik  | 1.1   | 1.2   | 1.3   | 1.9   | 0.9   | 1.1   | 0.8   | 1.4   | 0.9   | 1.1   | 1.5   | 1.1   |
| A330040F15Rik  | 0.1   | 0.3   | 0.2   | 0.0   | 0.1   | 0.1   | 0.1   | 0.0   | 0.0   | 0.0   | 0.2   | 0.0   |
| A330041J22Rik  | 0.1   | 0.0   | 0.0   | 0.2   | 0.1   | 0.1   | 0.1   | 0.0   | 0.2   | 0.1   | 0.2   | 0.0   |
| A330048O09Rik  | 0.0   | 0.0   | 0.0   | 0.0   | 0.0   | 0.0   | 0.0   | 0.0   | 0.0   | 0.1   | 0.1   | 0.1   |
| A330049N07Rik  | 0.0   | 0.0   | 0.0   | 0.0   | 0.0   | 0.0   | 0.0   | 0.0   | 0.0   | 0.0   | 0.0   | 0.0   |
| A330050B17Rik  | 0.2   | 0.2   | 0.1   | 0.3   | 0.2   | 0.3   | 0.2   | 0.1   | 0.1   | 0.2   | 0.2   | 0.2   |
| A330069E16Rik  | 0.4   | 0.3   | 0.6   | 0.1   | 0.6   | 0.5   | 0.8   | 0.7   | 0.4   | 0.5   | 0.4   | 0.7   |
| A330076H08Rik  | 0.0   | 0.1   | 0.2   | 0.0   | 0.0   | 0.1   | 0.0   | 0.2   | 0.1   | 0.3   | 0.3   | 0.1   |
| A330102I10Rik  | 0.1   | 0.1   | 0.1   | 0.0   | 0.1   | 0.2   | 0.1   | 0.0   | 0.1   | 0.0   | 0.0   | 0.1   |
| A3galt2        | 0.1   | 0.1   | 0.0   | 0.2   | 0.0   | 0.1   | 0.0   | 0.0   | 0.0   | 0.1   | 0.1   | 0.0   |
| A430005L14Rik  | 8.9   | 9.0   | 7.8   | 9.4   | 9.8   | 8.2   | 10.5  | 9.9   | 9.1   | 9.8   | 11.0  | 8.8   |
| A430033K04Rik  | 1.8   | 2.2   | 2.4   | 1.6   | 1.6   | 2.2   | 1.8   | 2.4   | 1.8   | 2.1   | 1.9   | 1.9   |

Online Table 1

|               |      |      |      |      |      |      |      |      |      |      |      |      |
|---------------|------|------|------|------|------|------|------|------|------|------|------|------|
| A430035B10Rik | 0.0  | 0.1  | 0.1  | 0.1  | 0.1  | 0.1  | 0.1  | 0.1  | 0.1  | 0.1  | 0.1  | 0.1  |
| A430071A18Rik | 0.0  | 0.1  | 0.1  | 0.2  | 0.1  | 0.0  | 0.1  | 0.1  | 0.1  | 0.0  | 0.1  | 0.1  |
| A430078G23Rik | 1.3  | 1.2  | 0.9  | 1.0  | 1.3  | 1.4  | 1.3  | 1.0  | 1.0  | 1.4  | 1.0  | 1.2  |
| A430088P11Rik | 0.0  | 0.0  | 0.0  | 0.1  | 0.1  | 0.1  | 0.0  | 0.0  | 0.0  | 0.0  | 0.0  | 0.0  |
| A430090L17Rik | 0.0  | 0.0  | 0.0  | 0.0  | 0.0  | 0.0  | 0.0  | 0.0  | 0.0  | 0.0  | 0.0  | 0.0  |
| A430092G05Rik | 0.0  | 0.0  | 0.0  | 0.0  | 0.0  | 0.0  | 0.0  | 0.0  | 0.0  | 0.0  | 0.0  | 0.0  |
| A430105I19Rik | 19.5 | 15.8 | 12.6 | 21.6 | 17.5 | 17.8 | 26.2 | 17.6 | 23.2 | 27.2 | 30.7 | 24.0 |
| A430107P09Rik | 0.0  | 0.1  | 0.0  | 0.0  | 0.0  | 0.0  | 0.0  | 0.0  | 0.0  | 0.0  | 0.1  | 0.1  |
| A4galt        | 5.8  | 4.7  | 8.0  | 9.6  | 11.8 | 6.2  | 4.9  | 7.6  | 3.3  | 4.2  | 2.6  | 4.7  |
| A4gnt         | 0.0  | 0.0  | 0.0  | 0.1  | 0.0  | 0.0  | 0.0  | 0.0  | 0.0  | 0.1  | 0.1  | 0.0  |
| A530013C23Rik | 0.7  | 0.7  | 0.6  | 0.5  | 0.8  | 0.9  | 0.5  | 0.6  | 0.6  | 0.7  | 0.6  | 0.5  |
| A530016L24Rik | 0.1  | 0.1  | 0.0  | 0.1  | 0.1  | 0.0  | 0.0  | 0.1  | 0.1  | 0.0  | 0.0  | 0.0  |
| A530032D15Rik | 0.4  | 0.6  | 0.6  | 0.6  | 0.6  | 0.4  | 0.3  | 0.3  | 0.3  | 0.4  | 0.3  | 0.4  |
| A530046M15Rik | 0.4  | 0.3  | 0.1  | 0.4  | 0.1  | 0.1  | 0.2  | 0.2  | 0.1  | 0.1  | 0.1  | 0.1  |
| A530054K11Rik | 2.7  | 2.7  | 2.9  | 2.9  | 3.0  | 3.0  | 2.3  | 2.8  | 2.3  | 2.8  | 2.9  | 3.2  |
| A530064D06Rik | 0.3  | 0.0  | 0.0  | 0.7  | 0.9  | 0.0  | 0.0  | 0.1  | 0.0  | 0.0  | 0.1  | 0.1  |
| A530072M11Rik | 0.9  | 0.9  | 0.7  | 0.6  | 0.4  | 0.8  | 0.9  | 0.4  | 0.7  | 0.6  | 0.8  | 0.6  |
| A530088E08Rik | 0.0  | 0.0  | 0.0  | 0.1  | 0.6  | 0.0  | 0.1  | 0.0  | 0.0  | 0.0  | 0.0  | 0.1  |
| A630001G21Rik | 0.7  | 0.7  | 0.3  | 1.5  | 2.2  | 0.6  | 0.7  | 0.4  | 0.4  | 0.6  | 0.7  | 0.5  |
| A630007B06Rik | 15.0 | 15.7 | 17.8 | 16.8 | 14.8 | 17.1 | 15.2 | 16.6 | 13.8 | 15.0 | 18.8 | 19.8 |
| A630019I02Rik | 0.1  | 0.1  | 0.0  | 0.0  | 0.0  | 0.0  | 0.1  | 0.1  | 0.1  | 0.0  | 0.1  | 0.1  |
| A630020A06    | 0.0  | 0.0  | 0.0  | 0.0  | 0.0  | 0.0  | 0.0  | 0.0  | 0.0  | 0.0  | 0.0  | 0.0  |
| A630023A22Rik | 0.2  | 0.2  | 0.1  | 0.1  | 0.3  | 0.1  | 0.3  | 0.2  | 0.1  | 0.4  | 0.1  | 0.1  |
| A630033H20Rik | 0.1  | 0.0  | 0.0  | 0.5  | 0.8  | 0.0  | 0.4  | 0.1  | 0.2  | 0.1  | 0.1  | 0.1  |
| A630066F11Rik | 0.8  | 1.7  | 1.0  | 1.2  | 0.9  | 1.2  | 0.9  | 1.5  | 1.1  | 0.7  | 1.2  | 1.2  |
| A630072M18Rik | 0.8  | 0.8  | 0.8  | 0.6  | 0.9  | 0.6  | 0.7  | 1.0  | 0.9  | 1.0  | 0.5  | 0.8  |
| A630075F10Rik | 0.0  | 0.0  | 0.0  | 0.0  | 0.0  | 0.0  | 0.0  | 0.0  | 0.0  | 0.1  | 0.0  | 0.1  |
| A630077J23Rik | 0.8  | 0.4  | 0.6  | 1.2  | 0.7  | 1.2  | 0.3  | 0.2  | 0.0  | 0.4  | 0.2  | 0.3  |
| A630089N07Rik | 3.0  | 3.6  | 4.5  | 2.7  | 3.0  | 3.3  | 4.3  | 3.1  | 2.1  | 3.6  | 2.7  | 3.4  |
| A730008H23Rik | 3.9  | 6.1  | 8.5  | 3.5  | 6.0  | 3.1  | 7.2  | 4.7  | 5.2  | 3.8  | 4.9  | 4.0  |
| A730017L22Rik | 0.7  | 1.1  | 0.8  | 1.3  | 1.1  | 0.6  | 0.8  | 0.4  | 0.7  | 0.8  | 0.6  | 0.7  |
| A730020M07Rik | 0.9  | 1.0  | 0.9  | 1.9  | 1.2  | 1.2  | 0.7  | 0.4  | 0.5  | 0.7  | 1.7  | 0.9  |
| A730056A06Rik | 0.1  | 0.1  | 0.1  | 0.1  | 0.0  | 0.1  | 0.0  | 0.2  | 0.0  | 0.1  | 0.0  | 0.0  |
| A730085A09Rik | 0.2  | 0.0  | 0.0  | 0.1  | 0.1  | 0.0  | 0.0  | 0.0  | 0.0  | 0.2  | 0.1  | 0.1  |
| A730090H04Rik | 0.1  | 0.0  | 0.0  | 0.1  | 0.0  | 0.1  | 0.0  | 0.0  | 0.0  | 0.2  | 0.0  | 0.1  |
| A730090N16Rik | 0.3  | 0.6  | 0.2  | 0.4  | 0.2  | 0.5  | 0.2  | 0.3  | 0.2  | 0.3  | 0.2  | 0.2  |
| A730098P11Rik | 1.4  | 1.7  | 1.9  | 2.3  | 2.1  | 1.7  | 1.9  | 2.1  | 1.9  | 2.2  | 2.0  | 2.2  |
| A830009L08Rik | 0.0  | 0.1  | 0.1  | 0.0  | 0.1  | 0.1  | 0.1  | 0.1  | 0.1  | 0.1  | 0.0  | 0.0  |
| A830010M20Rik | 1.5  | 1.5  | 1.7  | 1.3  | 1.3  | 1.8  | 1.5  | 1.3  | 1.2  | 1.3  | 1.7  | 1.5  |
| A830018L16Rik | 0.1  | 0.0  | 0.0  | 0.1  | 0.0  | 0.0  | 0.0  | 0.0  | 0.0  | 0.0  | 0.0  | 0.0  |
| A830052D11Rik | 0.3  | 0.4  | 0.4  | 0.2  | 0.2  | 0.2  | 0.2  | 0.5  | 0.2  | 0.3  | 0.3  | 0.0  |
| A830080D01Rik | 2.2  | 3.2  | 3.8  | 2.9  | 2.8  | 3.6  | 3.1  | 3.0  | 3.1  | 4.0  | 3.8  | 3.7  |
| A830082K12Rik | 0.1  | 0.1  | 0.4  | 0.3  | 0.2  | 0.5  | 0.2  | 0.6  | 0.4  | 0.4  | 0.6  | 0.4  |
| A830082N09Rik | 0.1  | 0.1  | 0.2  | 0.2  | 0.1  | 0.2  | 0.1  | 0.1  | 0.1  | 0.2  | 0.2  | 0.2  |
| A930001C03Rik | 0.7  | 0.7  | 0.5  | 0.7  | 0.6  | 0.4  | 0.4  | 0.5  | 0.2  | 0.3  | 0.5  | 0.2  |
| A930003A15Rik | 0.1  | 0.2  | 0.2  | 0.2  | 0.3  | 0.0  | 0.3  | 0.1  | 0.3  | 0.3  | 0.6  | 0.3  |
| A930003O13Rik | 0.0  | 0.0  | 0.0  | 0.0  | 0.0  | 0.0  | 0.0  | 0.0  | 0.0  | 0.0  | 0.0  | 0.0  |
| A930004D18Rik | 1.9  | 1.9  | 1.7  | 1.4  | 1.6  | 2.4  | 1.9  | 2.6  | 1.9  | 1.7  | 2.3  | 1.9  |
| A930005H10Rik | 2.7  | 2.2  | 2.8  | 3.4  | 1.7  | 2.3  | 1.8  | 2.7  | 1.0  | 1.2  | 2.3  | 2.0  |
| A930006K02Rik | 0.1  | 0.1  | 0.5  | 0.2  | 0.1  | 0.0  | 0.1  | 0.1  | 0.1  | 0.1  | 0.1  | 0.0  |
| A930007I19Rik | 0.0  | 0.1  | 0.0  | 0.0  | 0.1  | 0.1  | 0.0  | 0.1  | 0.0  | 0.1  | 0.1  | 0.0  |
| A930011G23Rik | 0.0  | 0.0  | 0.0  | 0.0  | 0.0  | 0.0  | 0.0  | 0.0  | 0.0  | 0.0  | 0.0  | 0.0  |
| A930012L18Rik | 1.2  | 1.0  | 0.6  | 0.6  | 0.8  | 1.2  | 0.7  | 0.7  | 0.5  | 0.7  | 0.5  | 0.4  |
| A930013F10Rik | 0.5  | 0.6  | 0.7  | 0.4  | 0.3  | 0.5  | 0.4  | 0.5  | 0.5  | 0.4  | 0.2  | 0.4  |
| A930015D03Rik | 0.5  | 0.3  | 0.4  | 0.2  | 0.5  | 0.3  | 0.6  | 0.1  | 0.3  | 0.7  | 0.0  | 0.5  |
| A930016O22Rik | 0.0  | 0.0  | 0.0  | 0.0  | 0.0  | 0.0  | 0.0  | 0.0  | 0.0  | 0.0  | 0.1  | 0.0  |
| A930017M01Rik | 0.0  | 0.0  | 0.0  | 0.0  | 0.0  | 0.0  | 0.0  | 0.0  | 0.0  | 0.0  | 0.0  | 0.0  |

Online Table 1

|               |      |      |      |      |      |      |      |      |      |      |      |      |
|---------------|------|------|------|------|------|------|------|------|------|------|------|------|
| A930018P22Rik | 0.0  | 0.2  | 0.0  | 0.1  | 0.1  | 0.2  | 0.2  | 0.1  | 0.0  | 0.1  | 0.3  | 0.2  |
| A930019D19Rik | 0.1  | 0.0  | 0.0  | 0.0  | 0.1  | 0.0  | 0.1  | 0.0  | 0.0  | 0.1  | 0.0  | 0.0  |
| A930024E05Rik | 0.5  | 0.4  | 0.7  | 0.5  | 0.3  | 0.4  | 0.2  | 0.1  | 0.3  | 0.2  | 0.4  | 0.6  |
| A930041C12Rik | 0.1  | 0.2  | 0.0  | 0.2  | 0.0  | 0.2  | 0.0  | 0.0  | 0.0  | 0.0  | 0.0  | 0.2  |
| AA388235      | 0.7  | 0.6  | 0.6  | 0.7  | 0.4  | 0.7  | 0.5  | 0.7  | 0.3  | 0.6  | 0.6  | 0.7  |
| AA414768      | 9.7  | 14.6 | 10.8 | 10.5 | 10.7 | 9.3  | 13.9 | 9.6  | 17.7 | 14.7 | 15.1 | 17.9 |
| AA415398      | 1.2  | 1.1  | 1.1  | 1.5  | 0.8  | 1.2  | 1.2  | 1.1  | 0.7  | 1.0  | 1.1  | 1.0  |
| AA465934      | 0.0  | 0.0  | 1.1  | 0.4  | 0.3  | 0.2  | 0.3  | 0.6  | 0.4  | 0.5  | 0.2  | 0.6  |
| AA467197      | 2.4  | 0.3  | 0.9  | 6.7  | 14.0 | 1.6  | 2.3  | 1.0  | 0.8  | 1.1  | 0.7  | 1.3  |
| AA474331      | 2.7  | 2.2  | 1.8  | 1.2  | 1.0  | 1.8  | 1.6  | 1.1  | 2.1  | 1.5  | 1.6  | 1.3  |
| AA536875      | 0.0  | 0.0  | 0.0  | 0.0  | 0.0  | 0.0  | 0.0  | 0.0  | 0.0  | 0.0  | 0.0  | 0.0  |
| AA543186      | 0.2  | 0.7  | 0.5  | 0.5  | 0.5  | 0.7  | 0.5  | 0.6  | 0.5  | 0.6  | 0.5  | 0.7  |
| AA792892      | 0.0  | 0.0  | 0.0  | 0.0  | 0.0  | 0.0  | 0.0  | 0.0  | 0.0  | 0.1  | 0.0  | 0.0  |
| AA986860      | 0.9  | 0.6  | 0.8  | 0.8  | 0.4  | 0.7  | 0.6  | 0.6  | 0.3  | 0.5  | 0.7  | 0.6  |
| AA987161      | 2.6  | 3.2  | 3.4  | 3.3  | 3.6  | 3.3  | 2.5  | 3.1  | 2.9  | 3.5  | 3.5  | 3.9  |
| Aaas          | 18.3 | 18.9 | 19.2 | 18.7 | 16.2 | 19.5 | 19.7 | 14.7 | 15.0 | 18.8 | 17.7 | 17.0 |
| Aacs          | 21.2 | 20.0 | 18.3 | 13.0 | 19.2 | 12.4 | 33.2 | 32.2 | 29.0 | 16.3 | 26.1 | 16.3 |
| Aadac         | 0.0  | 0.0  | 0.0  | 0.0  | 0.0  | 0.0  | 0.0  | 0.0  | 0.0  | 0.0  | 0.0  | 0.0  |
| Aadat         | 0.0  | 0.0  | 0.0  | 0.1  | 0.0  | 0.0  | 0.0  | 0.0  | 0.0  | 0.0  | 0.0  | 0.0  |
| Aaed1         | 34.6 | 28.2 | 24.8 | 25.7 | 29.4 | 31.6 | 24.4 | 23.5 | 23.2 | 29.3 | 28.6 | 30.9 |
| Aagab         | 16.6 | 13.8 | 12.5 | 18.1 | 13.9 | 16.2 | 12.5 | 11.9 | 12.0 | 14.1 | 14.9 | 14.1 |
| Aak1          | 2.2  | 2.6  | 2.6  | 1.9  | 2.2  | 2.1  | 2.4  | 2.1  | 2.0  | 2.1  | 2.1  | 1.8  |
| Aamdc         | 16.1 | 16.3 | 14.3 | 17.3 | 14.1 | 20.1 | 14.7 | 16.6 | 15.2 | 18.3 | 18.3 | 18.6 |
| Aamp          | 67.9 | 69.2 | 66.6 | 69.8 | 62.3 | 65.1 | 71.3 | 70.6 | 73.0 | 72.6 | 67.6 | 73.8 |
| Aanat         | 0.0  | 0.0  | 0.0  | 0.0  | 0.0  | 0.0  | 0.1  | 0.0  | 0.1  | 0.1  | 0.0  | 0.1  |
| Aar2          | 6.5  | 7.0  | 5.3  | 7.9  | 6.5  | 7.2  | 6.3  | 5.9  | 5.9  | 6.8  | 5.7  | 6.2  |
| Aard          | 2.2  | 0.8  | 0.5  | 2.4  | 0.5  | 2.0  | 0.3  | 0.2  | 0.2  | 0.1  | 0.6  | 0.2  |
| Aars          | 53.7 | 39.5 | 34.8 | 52.3 | 40.6 | 52.6 | 49.8 | 66.7 | 51.6 | 41.1 | 54.9 | 44.5 |
| Aars2         | 2.7  | 3.0  | 2.9  | 2.5  | 3.0  | 3.5  | 3.2  | 3.1  | 3.2  | 2.9  | 2.9  | 2.7  |
| Aarsd1        | 11.4 | 9.4  | 10.9 | 12.5 | 8.9  | 11.6 | 10.2 | 10.8 | 10.7 | 9.3  | 9.5  | 10.6 |
| Aasdh         | 2.2  | 2.7  | 3.1  | 2.5  | 2.0  | 3.0  | 1.5  | 2.0  | 2.0  | 2.3  | 1.9  | 1.9  |
| Aasdhppt      | 8.3  | 7.8  | 7.6  | 7.9  | 7.3  | 8.7  | 6.5  | 6.8  | 7.0  | 9.7  | 8.4  | 8.3  |
| Aass          | 2.9  | 2.5  | 2.6  | 1.2  | 1.1  | 2.0  | 1.2  | 1.1  | 0.9  | 2.3  | 2.0  | 1.3  |
| Aatf          | 16.1 | 15.3 | 14.2 | 17.4 | 12.3 | 14.1 | 16.4 | 14.0 | 12.5 | 16.9 | 18.0 | 16.9 |
| Aatk          | 0.3  | 0.1  | 0.1  | 0.9  | 0.7  | 0.4  | 0.1  | 0.1  | 0.1  | 0.1  | 0.0  | 0.1  |
| AB099516      | 0.0  | 0.0  | 0.0  | 0.0  | 0.0  | 0.0  | 0.0  | 0.0  | 0.0  | 0.0  | 0.1  | 0.0  |
| AB124611      | 0.3  | 0.1  | 0.2  | 2.7  | 6.0  | 0.2  | 0.4  | 0.1  | 0.0  | 0.4  | 0.1  | 0.5  |
| Abat          | 14.2 | 14.4 | 16.7 | 11.8 | 12.3 | 12.3 | 11.5 | 12.2 | 10.9 | 25.2 | 17.6 | 15.5 |
| Abca1         | 13.0 | 17.4 | 18.4 | 12.9 | 11.8 | 20.6 | 7.4  | 8.1  | 11.1 | 17.3 | 8.8  | 10.8 |
| Abca12        | 0.0  | 0.0  | 0.0  | 0.0  | 0.0  | 0.0  | 0.0  | 0.0  | 0.0  | 0.0  | 0.0  | 0.0  |
| Abca13        | 0.0  | 0.0  | 0.0  | 0.0  | 0.0  | 0.0  | 0.0  | 0.0  | 0.0  | 0.0  | 0.0  | 0.0  |
| Abca17        | 0.1  | 0.1  | 0.1  | 0.1  | 0.1  | 0.1  | 0.1  | 0.0  | 0.0  | 0.1  | 0.1  | 0.1  |
| Abca2         | 6.0  | 4.6  | 4.1  | 5.4  | 4.5  | 6.5  | 3.8  | 4.1  | 3.6  | 3.9  | 3.1  | 3.0  |
| Abca3         | 6.1  | 5.3  | 5.1  | 6.0  | 5.4  | 6.1  | 3.7  | 3.7  | 4.1  | 4.8  | 4.1  | 3.8  |
| Abca4         | 0.4  | 0.2  | 0.2  | 0.2  | 0.1  | 0.1  | 0.1  | 0.2  | 0.2  | 0.2  | 0.2  | 0.1  |
| Abca5         | 1.8  | 2.3  | 2.6  | 1.8  | 2.2  | 1.8  | 2.1  | 2.1  | 2.4  | 1.6  | 2.1  | 2.5  |
| Abca6         | 1.2  | 1.7  | 2.3  | 0.7  | 0.9  | 0.6  | 0.8  | 1.2  | 1.0  | 1.5  | 1.7  | 1.1  |
| Abca7         | 2.3  | 2.8  | 2.7  | 2.0  | 3.0  | 2.5  | 1.9  | 3.0  | 2.5  | 1.4  | 1.3  | 1.7  |
| Abca8a        | 8.5  | 18.6 | 50.2 | 2.5  | 10.3 | 2.5  | 8.8  | 16.3 | 13.7 | 18.1 | 8.2  | 20.2 |
| Abca8b        | 5.4  | 7.6  | 11.0 | 3.9  | 4.7  | 4.5  | 3.9  | 7.0  | 5.5  | 5.5  | 5.0  | 7.5  |
| Abca9         | 1.9  | 3.4  | 6.9  | 1.0  | 1.9  | 0.8  | 1.9  | 4.9  | 3.4  | 3.2  | 2.5  | 3.6  |
| Abcb10        | 6.0  | 6.1  | 5.1  | 5.2  | 6.2  | 6.4  | 8.0  | 6.6  | 8.0  | 5.5  | 7.1  | 5.5  |
| Abcb11        | 0.0  | 0.0  | 0.0  | 0.0  | 0.0  | 0.0  | 0.0  | 0.0  | 0.0  | 0.0  | 0.0  | 0.0  |
| Abcb1a        | 1.8  | 0.7  | 0.6  | 1.0  | 1.0  | 0.6  | 0.9  | 0.6  | 0.6  | 0.5  | 0.6  | 0.4  |
| Abcb1b        | 11.0 | 6.0  | 5.7  | 9.1  | 10.8 | 6.5  | 8.8  | 4.6  | 5.2  | 5.8  | 7.0  | 5.5  |
| Abcb4         | 0.1  | 0.1  | 0.0  | 0.7  | 1.9  | 0.0  | 0.1  | 0.0  | 0.0  | 0.2  | 0.0  | 0.2  |
| Abcb6         | 6.9  | 8.4  | 6.1  | 8.0  | 7.2  | 7.7  | 6.6  | 7.1  | 8.1  | 5.0  | 6.3  | 4.8  |

Online Table 1

|         |      |      |      |      |      |      |      |      |      |      |      |      |
|---------|------|------|------|------|------|------|------|------|------|------|------|------|
| Abcb7   | 3.6  | 3.5  | 3.6  | 4.3  | 4.4  | 3.2  | 2.7  | 3.4  | 3.2  | 3.8  | 4.7  | 4.2  |
| Abcb8   | 4.8  | 3.8  | 3.3  | 4.2  | 3.9  | 4.4  | 3.9  | 4.7  | 4.8  | 4.9  | 4.2  | 3.9  |
| Abcb9   | 0.4  | 0.5  | 0.3  | 0.5  | 0.4  | 0.6  | 0.3  | 0.2  | 0.4  | 0.5  | 0.6  | 0.4  |
| Abcc1   | 20.0 | 17.2 | 14.8 | 29.8 | 31.3 | 29.0 | 18.3 | 18.6 | 14.2 | 18.9 | 17.2 | 13.9 |
| Abcc10  | 0.5  | 0.8  | 0.5  | 0.6  | 0.5  | 0.6  | 0.6  | 0.6  | 0.7  | 0.6  | 0.5  | 0.3  |
| Abcc12  | 0.1  | 0.0  | 0.0  | 0.0  | 0.0  | 0.0  | 0.0  | 0.0  | 0.0  | 0.1  | 0.0  | 0.0  |
| Abcc2   | 0.0  | 0.0  | 0.0  | 0.1  | 0.0  | 0.0  | 0.0  | 0.0  | 0.0  | 0.0  | 0.0  | 0.0  |
| Abcc3   | 1.8  | 1.6  | 1.3  | 4.5  | 7.2  | 2.1  | 2.1  | 1.3  | 1.3  | 1.1  | 1.0  | 1.0  |
| Abcc4   | 5.2  | 4.8  | 4.7  | 6.8  | 7.2  | 8.3  | 4.4  | 5.7  | 3.2  | 3.7  | 4.0  | 3.2  |
| Abcc5   | 16.8 | 15.9 | 16.4 | 12.1 | 14.4 | 14.2 | 15.1 | 19.7 | 17.7 | 17.3 | 15.4 | 14.1 |
| Abcc6   | 0.0  | 0.0  | 0.0  | 0.0  | 0.0  | 0.0  | 0.0  | 0.0  | 0.0  | 0.0  | 0.0  | 0.0  |
| Abcc9   | 0.0  | 0.1  | 0.1  | 0.0  | 0.0  | 0.0  | 0.0  | 0.1  | 0.1  | 0.0  | 0.1  | 0.0  |
| Abcd1   | 3.2  | 3.9  | 3.8  | 5.1  | 4.5  | 4.2  | 4.5  | 4.9  | 4.5  | 3.8  | 4.2  | 3.1  |
| Abcd2   | 0.2  | 0.3  | 0.3  | 0.1  | 0.2  | 0.1  | 0.1  | 0.3  | 0.2  | 0.2  | 0.2  | 0.3  |
| Abcd3   | 24.2 | 26.6 | 28.0 | 23.2 | 23.3 | 24.3 | 25.1 | 29.2 | 26.9 | 26.8 | 30.0 | 30.6 |
| Abcd4   | 4.9  | 5.6  | 6.0  | 5.2  | 5.0  | 8.6  | 5.1  | 5.9  | 5.7  | 5.0  | 5.3  | 4.1  |
| Abce1   | 56.5 | 52.0 | 49.7 | 57.2 | 53.9 | 53.5 | 48.1 | 49.1 | 49.3 | 53.2 | 57.3 | 54.0 |
| Abcf1   | 38.3 | 34.1 | 36.9 | 46.3 | 35.6 | 40.0 | 40.6 | 37.0 | 28.9 | 31.4 | 37.5 | 37.8 |
| Abcf2   | 41.3 | 40.5 | 38.4 | 41.5 | 39.9 | 37.9 | 44.9 | 41.3 | 35.8 | 39.3 | 44.5 | 39.1 |
| Abcf3   | 14.6 | 14.6 | 14.2 | 16.5 | 13.3 | 15.4 | 14.1 | 13.5 | 12.8 | 14.5 | 13.5 | 15.1 |
| Abcg1   | 1.0  | 0.4  | 0.5  | 3.8  | 4.1  | 1.8  | 0.8  | 0.3  | 0.4  | 0.7  | 0.1  | 0.4  |
| Abcg2   | 10.2 | 9.3  | 7.7  | 8.1  | 9.1  | 7.6  | 6.7  | 8.2  | 5.7  | 6.2  | 6.9  | 4.1  |
| Abcg3   | 0.0  | 0.0  | 0.0  | 0.2  | 0.2  | 0.0  | 0.0  | 0.0  | 0.0  | 0.0  | 0.0  | 0.0  |
| Abcg4   | 0.1  | 0.1  | 0.1  | 0.0  | 0.0  | 0.1  | 0.1  | 0.1  | 0.1  | 0.0  | 0.0  | 0.0  |
| Abcg8   | 0.0  | 0.0  | 0.0  | 0.1  | 0.0  | 0.0  | 0.0  | 0.0  | 0.0  | 0.0  | 0.0  | 0.0  |
| Abhd1   | 0.4  | 0.6  | 0.3  | 0.4  | 0.2  | 0.5  | 0.4  | 0.7  | 0.3  | 0.2  | 0.3  | 0.3  |
| Abhd10  | 2.3  | 2.4  | 3.0  | 2.5  | 2.5  | 3.2  | 1.6  | 3.3  | 2.3  | 2.5  | 2.0  | 2.8  |
| Abhd11  | 14.2 | 13.9 | 12.1 | 9.1  | 12.8 | 12.4 | 11.3 | 12.1 | 12.3 | 10.0 | 9.4  | 10.7 |
| Abhd12  | 30.6 | 20.5 | 20.0 | 44.0 | 51.8 | 27.6 | 25.3 | 20.0 | 21.2 | 27.7 | 22.5 | 24.3 |
| Abhd13  | 7.0  | 7.4  | 7.1  | 6.8  | 6.9  | 6.4  | 6.3  | 6.2  | 6.9  | 8.0  | 7.2  | 7.3  |
| Abhd14a | 15.1 | 12.4 | 11.7 | 14.6 | 12.1 | 15.7 | 10.8 | 10.8 | 11.4 | 13.0 | 11.3 | 9.9  |
| Abhd14b | 7.7  | 7.4  | 7.3  | 8.8  | 7.2  | 5.9  | 7.4  | 8.3  | 8.5  | 5.9  | 6.5  | 6.0  |
| Abhd15  | 3.2  | 3.4  | 2.0  | 5.2  | 5.6  | 4.0  | 7.1  | 3.5  | 3.8  | 4.0  | 4.1  | 4.3  |
| Abhd16a | 12.8 | 12.0 | 13.5 | 16.7 | 15.9 | 15.3 | 17.7 | 14.4 | 15.7 | 15.0 | 13.6 | 14.9 |
| Abhd16b | 0.3  | 0.3  | 0.2  | 0.1  | 0.2  | 0.3  | 0.2  | 0.2  | 0.1  | 0.3  | 0.1  | 0.3  |
| Abhd2   | 21.7 | 22.5 | 18.8 | 28.3 | 23.2 | 23.5 | 25.7 | 23.7 | 26.8 | 22.2 | 21.1 | 24.5 |
| Abhd3   | 3.4  | 4.0  | 4.2  | 3.6  | 2.1  | 4.1  | 2.1  | 2.8  | 2.3  | 2.0  | 2.2  | 3.0  |
| Abhd4   | 74.2 | 63.8 | 54.5 | 78.7 | 61.5 | 87.7 | 49.5 | 46.8 | 43.3 | 64.4 | 55.4 | 52.8 |
| Abhd5   | 18.3 | 14.9 | 13.6 | 23.0 | 17.3 | 21.7 | 13.4 | 12.8 | 12.9 | 14.2 | 14.7 | 14.6 |
| Abhd6   | 1.7  | 1.7  | 1.8  | 2.2  | 1.2  | 1.8  | 1.5  | 1.3  | 1.2  | 1.6  | 1.9  | 1.6  |
| Abhd8   | 28.9 | 29.4 | 24.5 | 22.3 | 23.6 | 33.3 | 26.8 | 23.9 | 26.1 | 27.1 | 24.1 | 21.0 |
| Abi1    | 21.2 | 22.8 | 21.0 | 27.2 | 26.8 | 23.7 | 24.5 | 22.0 | 22.2 | 21.9 | 24.7 | 24.4 |
| Abi2    | 6.4  | 8.6  | 8.6  | 5.1  | 6.1  | 7.2  | 6.5  | 7.8  | 8.3  | 7.6  | 8.0  | 8.2  |
| Abi3    | 0.4  | 0.4  | 0.3  | 1.2  | 1.3  | 0.6  | 0.3  | 0.3  | 0.5  | 0.4  | 0.3  | 0.4  |
| Abi3bp  | 0.2  | 0.3  | 2.4  | 0.3  | 0.4  | 0.1  | 0.1  | 0.8  | 0.2  | 0.6  | 0.9  | 0.6  |
| Abl1    | 11.6 | 13.1 | 13.2 | 9.7  | 12.1 | 10.9 | 13.5 | 13.2 | 13.5 | 12.2 | 11.7 | 10.2 |
| Abl2    | 5.2  | 5.3  | 4.4  | 4.8  | 5.1  | 4.6  | 4.8  | 4.9  | 4.7  | 6.1  | 5.7  | 5.0  |
| Ablim1  | 14.2 | 11.7 | 12.9 | 11.1 | 10.5 | 8.3  | 12.1 | 20.9 | 9.7  | 11.8 | 13.0 | 10.7 |
| Ablim2  | 0.2  | 0.2  | 0.1  | 0.1  | 0.1  | 0.2  | 0.0  | 0.1  | 0.1  | 0.1  | 0.1  | 0.1  |
| Ablim3  | 2.5  | 1.7  | 2.0  | 1.1  | 0.6  | 1.3  | 1.2  | 3.2  | 1.1  | 1.8  | 1.6  | 1.5  |
| Abp1    | 0.0  | 0.0  | 0.1  | 0.0  | 0.1  | 0.0  | 0.0  | 0.1  | 0.0  | 0.0  | 0.0  | 0.0  |
| Abr     | 6.9  | 5.6  | 5.3  | 13.3 | 16.7 | 7.3  | 8.7  | 6.6  | 6.1  | 6.8  | 6.5  | 7.0  |
| Abra    | 0.1  | 0.0  | 0.1  | 0.2  | 0.0  | 0.1  | 0.0  | 0.1  | 0.0  | 0.1  | 0.1  | 0.0  |
| Abracl  | 31.3 | 27.0 | 25.6 | 33.4 | 37.1 | 27.6 | 38.2 | 25.3 | 32.1 | 49.1 | 57.5 | 46.4 |
| Abt1    | 2.0  | 2.1  | 1.6  | 2.3  | 1.7  | 2.3  | 2.2  | 1.8  | 2.0  | 2.3  | 2.5  | 2.4  |
| Abtb1   | 5.3  | 5.0  | 4.6  | 5.0  | 5.6  | 7.1  | 4.5  | 5.8  | 5.0  | 5.0  | 4.7  | 4.4  |
| Abtb2   | 1.4  | 1.2  | 0.7  | 1.5  | 1.5  | 1.5  | 1.5  | 1.2  | 1.6  | 1.3  | 1.1  | 1.1  |

Online Table 1

|        |      |      |      |      |      |      |      |      |      |      |      |      |
|--------|------|------|------|------|------|------|------|------|------|------|------|------|
| Acaa1a | 29.7 | 26.7 | 21.8 | 23.5 | 26.6 | 24.9 | 22.4 | 23.7 | 25.6 | 29.8 | 22.5 | 23.2 |
| Acaa1b | 8.9  | 8.4  | 6.7  | 6.0  | 7.6  | 7.2  | 5.9  | 5.7  | 7.6  | 9.0  | 6.2  | 5.8  |
| Acaa2  | 11.4 | 9.8  | 6.3  | 10.1 | 8.0  | 11.2 | 7.6  | 10.5 | 9.1  | 19.8 | 12.4 | 11.3 |
| Acaca  | 10.0 | 9.7  | 8.6  | 7.5  | 7.4  | 7.5  | 10.3 | 11.4 | 9.2  | 6.1  | 10.2 | 7.5  |
| Acacb  | 0.5  | 0.8  | 0.9  | 0.5  | 0.5  | 0.8  | 0.5  | 0.7  | 0.6  | 0.4  | 0.4  | 0.5  |
| Acad10 | 1.5  | 1.2  | 1.1  | 1.5  | 1.4  | 1.6  | 1.0  | 1.3  | 1.0  | 1.2  | 0.7  | 1.0  |
| Acad11 | 22.4 | 20.8 | 20.2 | 19.3 | 19.2 | 22.1 | 14.5 | 15.5 | 14.8 | 17.1 | 16.8 | 17.1 |
| Acad12 | 2.7  | 2.5  | 2.5  | 2.6  | 2.5  | 2.6  | 2.0  | 2.2  | 2.4  | 2.2  | 2.5  | 2.7  |
| Acad8  | 11.3 | 11.4 | 10.2 | 10.9 | 9.9  | 11.5 | 9.2  | 8.2  | 9.8  | 10.2 | 10.4 | 9.8  |
| Acad9  | 8.9  | 7.3  | 6.5  | 6.6  | 7.8  | 6.9  | 7.5  | 6.8  | 6.2  | 7.0  | 7.7  | 7.4  |
| Acadl  | 16.0 | 14.1 | 14.2 | 14.2 | 14.0 | 17.0 | 14.1 | 16.9 | 15.0 | 14.9 | 15.7 | 18.6 |
| Acadm  | 22.6 | 20.4 | 17.7 | 24.5 | 18.6 | 24.7 | 16.2 | 20.6 | 20.4 | 20.7 | 20.3 | 21.5 |
| Acads  | 9.3  | 8.5  | 9.3  | 9.7  | 10.4 | 11.1 | 10.1 | 11.3 | 10.9 | 11.4 | 9.2  | 8.0  |
| Acadsb | 46.8 | 46.4 | 55.6 | 45.4 | 38.7 | 43.5 | 42.8 | 47.9 | 42.6 | 45.4 | 51.6 | 56.9 |
| Acadvl | 65.3 | 58.8 | 52.4 | 57.5 | 55.2 | 57.2 | 48.5 | 45.7 | 48.7 | 56.2 | 49.7 | 57.0 |
| Acan   | 0.1  | 0.1  | 0.1  | 0.0  | 0.0  | 0.0  | 0.1  | 0.3  | 0.3  | 0.1  | 0.1  | 0.2  |
| Acap1  | 0.0  | 0.0  | 0.0  | 0.5  | 1.3  | 0.0  | 0.2  | 0.0  | 0.0  | 0.1  | 0.0  | 0.0  |
| Acap2  | 15.1 | 18.9 | 20.7 | 13.8 | 15.5 | 14.8 | 15.8 | 16.8 | 16.2 | 16.2 | 15.8 | 17.0 |
| Acap3  | 4.4  | 5.0  | 4.6  | 5.6  | 5.0  | 4.5  | 5.3  | 5.4  | 5.8  | 5.1  | 4.2  | 4.3  |
| Acat1  | 18.8 | 15.7 | 17.2 | 14.8 | 14.3 | 14.9 | 14.1 | 14.7 | 12.9 | 17.1 | 16.8 | 18.0 |
| Acat2  | 12.0 | 17.1 | 14.4 | 5.2  | 8.6  | 8.5  | 18.2 | 20.4 | 16.4 | 7.0  | 17.1 | 6.5  |
| Acat3  | 25.7 | 22.9 | 18.6 | 21.5 | 20.5 | 19.1 | 20.4 | 19.9 | 19.8 | 21.3 | 24.5 | 21.0 |
| Acbd3  | 26.7 | 26.9 | 28.8 | 30.7 | 27.4 | 28.8 | 30.2 | 25.6 | 25.7 | 25.5 | 31.6 | 33.0 |
| Acbd4  | 6.0  | 6.8  | 6.2  | 6.8  | 4.7  | 6.9  | 5.7  | 5.3  | 6.4  | 5.8  | 5.3  | 5.6  |
| Acbd5  | 21.5 | 18.9 | 18.8 | 28.0 | 19.0 | 26.5 | 21.1 | 15.0 | 17.8 | 19.2 | 23.1 | 26.0 |
| Acbd6  | 19.6 | 15.7 | 15.0 | 15.4 | 13.6 | 14.9 | 14.3 | 16.5 | 15.9 | 15.4 | 13.5 | 15.1 |
| Acbd7  | 0.1  | 0.0  | 0.1  | 0.3  | 0.0  | 0.2  | 0.0  | 0.0  | 0.0  | 0.0  | 0.0  | 0.1  |
| Accs   | 1.5  | 1.8  | 1.4  | 1.5  | 1.2  | 2.1  | 1.5  | 2.3  | 1.7  | 1.3  | 1.5  | 1.8  |
| Acd    | 5.6  | 5.4  | 4.3  | 5.8  | 5.3  | 5.7  | 5.7  | 5.8  | 4.8  | 4.6  | 4.7  | 3.4  |
| Ace    | 0.6  | 0.6  | 1.2  | 0.5  | 0.7  | 1.0  | 0.5  | 1.3  | 0.4  | 0.5  | 0.5  | 0.3  |
| Ace2   | 0.1  | 0.0  | 0.0  | 0.1  | 0.1  | 0.0  | 0.0  | 0.0  | 0.0  | 0.2  | 0.1  | 0.1  |
| Acer2  | 0.3  | 0.3  | 0.2  | 0.4  | 0.3  | 0.4  | 0.1  | 0.1  | 0.1  | 0.2  | 0.2  | 0.1  |
| Acer3  | 5.1  | 3.8  | 4.7  | 4.5  | 4.7  | 4.0  | 4.4  | 4.7  | 4.2  | 4.6  | 5.8  | 5.0  |
| Ache   | 0.1  | 0.1  | 0.1  | 0.1  | 0.1  | 0.2  | 0.0  | 0.1  | 0.1  | 0.0  | 0.2  | 0.0  |
| Acin1  | 16.9 | 17.0 | 20.2 | 21.4 | 18.2 | 16.3 | 24.0 | 22.8 | 19.3 | 19.6 | 21.6 | 21.5 |
| Acly   | 47.9 | 51.8 | 46.9 | 36.5 | 42.1 | 41.5 | 59.7 | 73.8 | 55.0 | 41.6 | 64.2 | 40.3 |
| Acmsd  | 0.0  | 0.2  | 0.0  | 0.1  | 0.1  | 0.0  | 0.0  | 0.0  | 0.0  | 0.0  | 0.1  | 0.0  |
| Acn9   | 6.7  | 4.1  | 5.1  | 6.2  | 4.0  | 7.8  | 5.8  | 3.7  | 5.3  | 7.4  | 4.0  | 4.2  |
| Acnat1 | 0.0  | 0.0  | 0.0  | 0.0  | 0.0  | 0.0  | 0.0  | 0.0  | 0.0  | 0.0  | 0.0  | 0.0  |
| Aco1   | 13.1 | 14.3 | 13.1 | 11.8 | 13.2 | 11.3 | 14.0 | 16.6 | 15.6 | 13.9 | 14.3 | 13.4 |
| Aco2   | 67.7 | 61.0 | 54.3 | 77.6 | 61.7 | 66.8 | 56.8 | 60.7 | 49.7 | 61.2 | 62.4 | 59.2 |
| Acot1  | 0.6  | 0.3  | 1.0  | 0.3  | 0.5  | 0.7  | 0.7  | 2.3  | 1.3  | 1.2  | 1.2  | 0.7  |
| Acot10 | 0.1  | 0.1  | 0.0  | 0.0  | 0.0  | 0.1  | 0.0  | 0.0  | 0.0  | 0.0  | 0.0  | 0.0  |
| Acot11 | 7.8  | 5.8  | 6.0  | 9.0  | 6.5  | 8.2  | 7.0  | 5.6  | 6.4  | 5.7  | 7.0  | 8.7  |
| Acot12 | 0.1  | 0.0  | 0.0  | 0.0  | 0.0  | 0.0  | 0.0  | 0.0  | 0.0  | 0.0  | 0.0  | 0.0  |
| Acot13 | 80.8 | 58.4 | 46.1 | 75.4 | 47.5 | 82.6 | 41.2 | 44.1 | 34.9 | 52.8 | 56.2 | 70.5 |
| Acot2  | 5.3  | 2.2  | 1.6  | 4.4  | 1.8  | 4.5  | 3.1  | 5.0  | 2.6  | 2.9  | 3.8  | 2.5  |
| Acot3  | 0.0  | 0.0  | 0.0  | 0.0  | 0.0  | 0.0  | 0.0  | 0.0  | 0.0  | 0.0  | 0.0  | 0.0  |
| Acot4  | 0.3  | 0.2  | 0.1  | 0.2  | 0.2  | 0.2  | 0.2  | 0.1  | 0.1  | 0.4  | 0.3  | 0.1  |
| Acot5  | 0.0  | 0.0  | 0.0  | 0.0  | 0.0  | 0.1  | 0.1  | 0.0  | 0.0  | 0.0  | 0.0  | 0.0  |
| Acot6  | 1.6  | 1.4  | 1.0  | 1.1  | 1.1  | 1.7  | 1.1  | 1.3  | 1.2  | 1.4  | 0.9  | 1.1  |
| Acot7  | 51.4 | 38.8 | 29.9 | 70.7 | 59.3 | 56.5 | 64.4 | 51.1 | 46.1 | 49.4 | 56.2 | 39.9 |
| Acot8  | 5.9  | 5.4  | 4.9  | 6.5  | 5.2  | 5.7  | 5.9  | 4.4  | 5.6  | 6.1  | 5.7  | 4.6  |
| Acot9  | 40.8 | 32.3 | 25.9 | 32.8 | 32.1 | 33.7 | 32.1 | 29.8 | 34.4 | 32.4 | 39.0 | 34.1 |
| Acox1  | 41.6 | 34.8 | 30.8 | 44.6 | 35.5 | 43.1 | 32.6 | 29.0 | 29.1 | 40.7 | 36.9 | 42.1 |
| Acox2  | 0.2  | 0.1  | 0.1  | 0.2  | 0.2  | 0.0  | 0.2  | 0.1  | 0.2  | 0.1  | 0.2  | 0.1  |
| Acox3  | 7.6  | 6.2  | 5.9  | 9.7  | 8.7  | 7.3  | 6.0  | 5.4  | 4.9  | 5.5  | 5.0  | 5.6  |

Online Table 1



|        |        |        |        |        |        |        |        |        |        |        |        |        |
|--------|--------|--------|--------|--------|--------|--------|--------|--------|--------|--------|--------|--------|
| Acox1  | 0.1    | 0.0    | 0.0    | 0.1    | 0.0    | 0.0    | 0.0    | 0.0    | 0.0    | 0.0    | 0.0    | 0.1    |
| Acp1   | 21.0   | 18.8   | 17.9   | 22.1   | 17.4   | 20.5   | 18.6   | 18.0   | 16.1   | 18.9   | 20.5   | 20.1   |
| Acp2   | 11.3   | 10.2   | 10.0   | 17.0   | 12.2   | 14.1   | 11.8   | 12.1   | 11.2   | 10.2   | 11.7   | 11.9   |
| Acp5   | 0.8    | 0.7    | 0.8    | 0.5    | 1.2    | 0.3    | 0.7    | 0.8    | 0.7    | 1.4    | 1.0    | 1.0    |
| Acp6   | 7.2    | 6.0    | 4.8    | 6.2    | 4.8    | 5.7    | 5.0    | 5.8    | 4.8    | 5.5    | 5.0    | 5.1    |
| Acpl2  | 4.7    | 6.3    | 8.1    | 4.6    | 5.9    | 7.8    | 11.2   | 9.5    | 11.8   | 8.9    | 8.6    | 12.8   |
| Acpp   | 0.2    | 0.1    | 0.1    | 0.2    | 0.0    | 0.0    | 0.0    | 0.1    | 0.1    | 0.1    | 0.0    | 0.0    |
| Acrbp  | 0.4    | 1.2    | 0.6    | 0.5    | 0.8    | 0.3    | 0.6    | 0.3    | 0.8    | 0.4    | 0.5    | 0.6    |
| Acsbg1 | 0.2    | 0.1    | 0.0    | 0.3    | 0.6    | 0.4    | 0.1    | 0.0    | 0.1    | 0.1    | 0.2    | 0.2    |
| Acsf2  | 1.8    | 2.4    | 2.1    | 1.7    | 1.2    | 1.8    | 1.1    | 1.5    | 1.8    | 1.8    | 1.1    | 1.4    |
| Acsf3  | 2.3    | 2.8    | 2.4    | 2.8    | 2.3    | 2.7    | 2.1    | 2.4    | 2.6    | 2.9    | 2.3    | 2.2    |
| Acsf1  | 6.6    | 5.3    | 6.6    | 7.2    | 6.3    | 5.5    | 6.3    | 5.9    | 4.7    | 4.9    | 5.4    | 5.4    |
| Acsf3  | 6.7    | 11.9   | 12.7   | 4.8    | 6.3    | 6.8    | 13.0   | 15.2   | 11.5   | 4.4    | 11.1   | 7.0    |
| Acsf4  | 11.6   | 11.8   | 12.9   | 14.1   | 16.4   | 8.6    | 15.7   | 11.2   | 12.6   | 14.0   | 17.0   | 14.0   |
| Acsf5  | 31.1   | 26.3   | 27.2   | 36.9   | 36.4   | 28.4   | 33.6   | 25.3   | 30.7   | 26.8   | 31.4   | 30.3   |
| Acsf6  | 0.0    | 0.0    | 0.1    | 0.0    | 0.0    | 0.0    | 0.0    | 0.1    | 0.1    | 0.0    | 0.0    | 0.1    |
| Acsm3  | 0.0    | 0.0    | 0.0    | 0.0    | 0.1    | 0.0    | 0.1    | 0.0    | 0.1    | 0.0    | 0.0    | 0.0    |
| Acsm4  | 0.0    | 0.0    | 0.0    | 0.0    | 0.0    | 0.0    | 0.0    | 0.0    | 0.0    | 0.0    | 0.1    | 0.0    |
| Acss1  | 0.1    | 0.1    | 0.0    | 0.6    | 1.4    | 0.0    | 0.3    | 0.0    | 0.0    | 0.1    | 0.0    | 0.1    |
| Acss2  | 6.4    | 10.8   | 9.9    | 3.5    | 5.8    | 6.1    | 7.5    | 14.1   | 7.9    | 3.2    | 7.7    | 3.4    |
| Acss3  | 0.1    | 0.1    | 0.1    | 0.1    | 0.1    | 0.0    | 0.0    | 0.1    | 0.0    | 0.0    | 0.0    | 0.0    |
| Acta1  | 1.3    | 0.7    | 0.6    | 2.0    | 1.4    | 0.8    | 1.5    | 0.6    | 1.2    | 1.8    | 2.0    | 1.0    |
| Acta2  | 401.3  | 299.2  | 266.7  | 430.6  | 444.2  | 259.6  | 674.9  | 330.0  | 548.1  | 497.1  | 865.8  | 554.4  |
| Actb   | 1815.6 | 1530.6 | 1385.1 | 2181.2 | 2798.9 | 1302.3 | 2815.4 | 1902.9 | 2479.7 | 2234.8 | 2644.7 | 2112.5 |
| Actc1  | 0.0    | 0.0    | 0.0    | 0.0    | 0.0    | 0.0    | 0.1    | 0.0    | 0.0    | 0.0    | 0.0    | 0.0    |
| Actg1  | 886.8  | 700.5  | 577.6  | 898.4  | 1044.2 | 678.7  | 1076.0 | 737.4  | 1027.1 | 1013.3 | 1137.0 | 905.1  |
| Actg2  | 2.7    | 1.7    | 0.7    | 3.1    | 4.6    | 2.0    | 4.8    | 1.8    | 5.7    | 15.1   | 25.1   | 9.0    |
| Actl10 | 0.1    | 0.1    | 0.0    | 0.0    | 0.0    | 0.1    | 0.1    | 0.1    | 0.1    | 0.1    | 0.0    | 0.1    |
| Actl11 | 0.0    | 0.0    | 0.0    | 0.0    | 0.0    | 0.0    | 0.0    | 0.0    | 0.0    | 0.0    | 0.0    | 0.0    |
| Actl6a | 15.4   | 17.2   | 16.0   | 14.8   | 16.3   | 13.8   | 17.0   | 16.6   | 15.8   | 15.7   | 15.7   | 15.4   |
| Actl7a | 0.2    | 0.1    | 0.0    | 0.0    | 0.0    | 0.1    | 0.0    | 0.1    | 0.0    | 0.1    | 0.1    | 0.0    |
| Actl7b | 0.0    | 0.1    | 0.1    | 0.1    | 0.0    | 0.0    | 0.0    | 0.0    | 0.0    | 0.0    | 0.0    | 0.0    |
| Actl9  | 0.0    | 0.0    | 0.1    | 0.0    | 0.0    | 0.1    | 0.0    | 0.1    | 0.0    | 0.0    | 0.0    | 0.0    |
| Actn1  | 183.0  | 154.3  | 136.9  | 182.7  | 156.9  | 148.3  | 218.2  | 176.6  | 170.4  | 178.0  | 223.4  | 181.2  |
| Actn2  | 0.0    | 0.0    | 0.0    | 0.0    | 0.0    | 0.0    | 0.0    | 0.0    | 0.0    | 0.0    | 0.0    | 0.0    |
| Actn3  | 0.7    | 1.4    | 1.3    | 0.4    | 0.7    | 0.5    | 0.8    | 0.7    | 0.7    | 1.9    | 1.7    | 1.3    |
| Actn4  | 28.9   | 37.6   | 42.1   | 33.4   | 51.0   | 28.9   | 59.5   | 54.6   | 52.8   | 55.0   | 50.7   | 54.5   |
| Actr10 | 20.1   | 19.7   | 15.2   | 18.3   | 18.1   | 19.3   | 16.4   | 16.5   | 17.6   | 19.4   | 18.9   | 17.6   |
| Actr1a | 53.9   | 51.5   | 47.4   | 57.7   | 52.4   | 54.8   | 59.6   | 55.5   | 55.1   | 53.5   | 56.4   | 52.3   |
| Actr1b | 52.8   | 43.3   | 34.8   | 62.2   | 43.5   | 55.1   | 46.7   | 35.9   | 40.7   | 43.5   | 44.6   | 39.4   |
| Actr2  | 58.6   | 50.7   | 42.0   | 70.1   | 76.7   | 61.7   | 49.9   | 43.0   | 52.1   | 59.0   | 54.6   | 58.4   |
| Actr3  | 68.6   | 62.0   | 57.6   | 85.3   | 100.0  | 61.8   | 85.3   | 61.5   | 76.1   | 74.8   | 93.7   | 78.4   |
| Actr3b | 0.6    | 0.7    | 0.7    | 0.7    | 0.8    | 0.6    | 0.5    | 0.6    | 0.5    | 0.6    | 0.4    | 0.7    |
| Actr5  | 2.0    | 2.0    | 1.8    | 1.5    | 2.1    | 2.1    | 2.1    | 2.2    | 2.1    | 1.8    | 1.8    | 1.2    |
| Actr6  | 5.9    | 6.4    | 5.8    | 5.9    | 5.2    | 6.1    | 3.7    | 4.2    | 5.1    | 6.6    | 5.8    | 6.5    |
| Actr8  | 11.2   | 10.2   | 10.1   | 12.1   | 10.4   | 11.5   | 11.3   | 10.7   | 11.3   | 11.0   | 12.3   | 11.2   |
| Acvr1  | 4.8    | 6.1    | 6.7    | 4.9    | 5.9    | 6.2    | 7.6    | 6.6    | 7.8    | 8.1    | 8.9    | 7.9    |
| Acvr1b | 4.7    | 8.8    | 14.1   | 4.2    | 9.1    | 3.5    | 8.3    | 11.4   | 8.0    | 5.5    | 5.3    | 7.5    |
| Acvr1c | 0.0    | 0.0    | 0.0    | 0.0    | 0.0    | 0.0    | 0.0    | 0.0    | 0.0    | 0.0    | 0.0    | 0.0    |
| Acvr2a | 3.3    | 3.6    | 4.2    | 4.1    | 3.7    | 3.4    | 4.1    | 6.0    | 5.2    | 4.9    | 5.9    | 4.8    |
| Acvr2b | 0.3    | 0.3    | 0.4    | 0.2    | 0.2    | 0.3    | 0.2    | 0.2    | 0.3    | 0.4    | 0.0    | 0.2    |
| Acvr11 | 53.5   | 61.2   | 73.7   | 55.6   | 68.3   | 50.5   | 80.3   | 78.8   | 65.3   | 36.4   | 43.6   | 50.1   |
| Acy1   | 7.8    | 8.4    | 6.3    | 7.3    | 6.4    | 9.0    | 6.9    | 6.5    | 8.2    | 7.4    | 7.1    | 7.0    |
| Acy3   | 7.6    | 8.2    | 7.8    | 9.2    | 5.6    | 8.3    | 5.7    | 5.0    | 5.6    | 4.9    | 6.7    | 5.1    |
| Acyp1  | 12.9   | 14.5   | 18.0   | 12.0   | 11.3   | 16.3   | 12.9   | 15.4   | 14.8   | 17.6   | 14.6   | 18.9   |
| Acyp2  | 21.9   | 18.3   | 17.5   | 32.4   | 21.0   | 24.2   | 18.5   | 19.8   | 19.8   | 13.7   | 25.8   | 24.6   |
| Ada    | 17.2   | 16.5   | 23.7   | 26.8   | 20.2   | 16.0   | 19.8   | 31.1   | 21.1   | 12.3   | 13.9   | 18.7   |

Online Table 1

|          |       |       |       |       |       |       |       |       |       |       |       |       |
|----------|-------|-------|-------|-------|-------|-------|-------|-------|-------|-------|-------|-------|
| Adal     | 2.9   | 2.9   | 3.1   | 3.3   | 3.3   | 3.5   | 2.4   | 3.4   | 3.2   | 3.3   | 3.2   | 3.2   |
| Adam10   | 19.0  | 23.3  | 28.5  | 19.8  | 27.4  | 20.6  | 28.3  | 31.9  | 28.8  | 29.8  | 33.0  | 33.3  |
| Adam11   | 0.1   | 0.1   | 0.2   | 0.1   | 0.1   | 0.1   | 0.1   | 0.3   | 0.2   | 0.3   | 0.1   | 0.1   |
| Adam12   | 1.1   | 2.7   | 9.7   | 0.7   | 4.7   | 0.5   | 6.7   | 18.5  | 11.8  | 8.5   | 7.0   | 9.7   |
| Adam15   | 47.7  | 44.4  | 38.2  | 55.7  | 61.7  | 48.6  | 56.2  | 51.9  | 52.7  | 47.1  | 44.2  | 40.4  |
| Adam17   | 16.3  | 18.0  | 21.8  | 21.3  | 28.3  | 17.9  | 17.6  | 19.7  | 18.2  | 16.0  | 14.8  | 18.9  |
| Adam18   | 0.0   | 0.1   | 0.0   | 0.0   | 0.1   | 0.0   | 0.1   | 0.0   | 0.1   | 0.0   | 0.0   | 0.0   |
| Adam19   | 12.7  | 16.7  | 15.6  | 14.0  | 20.9  | 15.3  | 26.9  | 18.1  | 20.8  | 13.3  | 14.3  | 13.3  |
| Adam1a   | 0.3   | 0.2   | 0.2   | 0.3   | 0.4   | 0.2   | 0.4   | 0.3   | 0.4   | 0.4   | 0.4   | 0.2   |
| Adam1b   | 0.0   | 0.0   | 0.0   | 0.0   | 0.0   | 0.1   | 0.1   | 0.0   | 0.0   | 0.0   | 0.1   | 0.0   |
| Adam21   | 0.0   | 0.1   | 0.0   | 0.0   | 0.0   | 0.0   | 0.0   | 0.1   | 0.0   | 0.1   | 0.0   | 0.0   |
| Adam22   | 0.2   | 0.1   | 0.2   | 0.2   | 0.1   | 0.2   | 0.2   | 0.2   | 0.3   | 0.5   | 0.2   | 0.4   |
| Adam23   | 7.2   | 10.7  | 10.9  | 13.5  | 9.8   | 14.1  | 11.8  | 9.1   | 8.2   | 20.0  | 22.1  | 12.0  |
| Adam28   | 0.0   | 0.0   | 0.0   | 0.0   | 0.0   | 0.0   | 0.0   | 0.0   | 0.0   | 0.1   | 0.0   | 0.0   |
| Adam3    | 0.2   | 0.0   | 0.0   | 0.1   | 0.0   | 0.1   | 0.0   | 0.0   | 0.0   | 0.0   | 0.0   | 0.0   |
| Adam32   | 0.1   | 0.1   | 0.2   | 0.2   | 0.1   | 0.3   | 0.1   | 0.1   | 0.2   | 0.2   | 0.1   | 0.1   |
| Adam33   | 0.3   | 0.1   | 0.1   | 0.1   | 0.0   | 0.1   | 0.0   | 0.0   | 0.1   | 0.5   | 0.2   | 0.0   |
| Adam39   | 0.0   | 0.0   | 0.0   | 0.0   | 0.0   | 0.0   | 0.0   | 0.0   | 0.0   | 0.0   | 0.0   | 0.0   |
| Adam4    | 0.1   | 0.1   | 0.1   | 0.1   | 0.2   | 0.1   | 0.1   | 0.2   | 0.1   | 0.1   | 0.1   | 0.2   |
| Adam5    | 0.8   | 0.8   | 0.8   | 0.3   | 0.8   | 0.6   | 0.8   | 0.6   | 0.6   | 0.3   | 0.6   | 0.5   |
| Adam8    | 6.1   | 0.3   | 0.6   | 49.1  | 79.4  | 0.4   | 6.5   | 1.3   | 1.2   | 4.6   | 1.4   | 2.9   |
| Adam9    | 152.6 | 148.4 | 138.1 | 160.4 | 172.4 | 136.7 | 179.3 | 136.3 | 149.1 | 169.8 | 182.0 | 170.1 |
| Adamts1  | 109.1 | 174.2 | 168.0 | 151.7 | 137.6 | 107.3 | 138.0 | 146.9 | 192.2 | 71.0  | 99.4  | 82.2  |
| Adamts10 | 12.8  | 15.9  | 19.6  | 9.3   | 14.1  | 10.9  | 14.3  | 17.5  | 22.6  | 11.7  | 12.0  | 12.8  |
| Adamts12 | 5.2   | 5.0   | 5.0   | 5.0   | 8.0   | 3.7   | 10.5  | 11.2  | 14.5  | 9.6   | 8.6   | 8.5   |
| Adamts13 | 0.0   | 0.0   | 0.0   | 0.0   | 0.0   | 0.0   | 0.0   | 0.0   | 0.0   | 0.0   | 0.0   | 0.0   |
| Adamts14 | 0.3   | 0.3   | 0.2   | 0.2   | 0.4   | 0.2   | 0.6   | 0.3   | 0.7   | 0.8   | 0.4   | 0.5   |
| Adamts15 | 0.0   | 0.1   | 0.2   | 0.0   | 0.0   | 0.0   | 0.0   | 0.4   | 0.3   | 0.4   | 0.4   | 0.5   |
| Adamts16 | 0.0   | 0.0   | 0.1   | 0.0   | 0.0   | 0.0   | 0.0   | 0.0   | 0.1   | 0.0   | 0.1   | 0.0   |
| Adamts17 | 0.0   | 0.0   | 0.0   | 0.0   | 0.0   | 0.0   | 0.0   | 0.0   | 0.0   | 0.0   | 0.0   | 0.0   |
| Adamts19 | 0.0   | 0.0   | 0.0   | 0.0   | 0.0   | 0.0   | 0.0   | 0.0   | 0.0   | 0.0   | 0.0   | 0.0   |
| Adamts2  | 38.5  | 64.7  | 96.8  | 31.1  | 65.3  | 29.1  | 79.3  | 109.4 | 94.6  | 57.4  | 51.2  | 70.6  |
| Adamts20 | 0.2   | 0.1   | 0.2   | 0.2   | 0.3   | 0.1   | 0.2   | 0.5   | 0.4   | 0.2   | 0.2   | 0.3   |
| Adamts3  | 0.0   | 0.1   | 0.4   | 0.0   | 0.1   | 0.0   | 0.1   | 0.2   | 0.1   | 0.3   | 0.1   | 0.1   |
| Adamts4  | 0.9   | 1.0   | 1.3   | 0.3   | 2.2   | 0.9   | 1.4   | 1.9   | 2.5   | 3.3   | 1.7   | 1.7   |
| Adamts5  | 117.9 | 149.2 | 161.2 | 141.1 | 116.2 | 128.0 | 140.6 | 141.0 | 140.4 | 79.8  | 112.8 | 101.0 |
| Adamts6  | 1.2   | 1.1   | 1.0   | 0.4   | 1.0   | 0.9   | 1.4   | 1.8   | 1.3   | 1.0   | 1.6   | 1.1   |
| Adamts7  | 1.4   | 1.7   | 2.1   | 1.1   | 2.6   | 1.2   | 1.7   | 2.0   | 1.5   | 1.6   | 0.9   | 1.0   |
| Adamts8  | 0.3   | 0.1   | 0.1   | 0.5   | 0.4   | 0.3   | 0.2   | 0.1   | 0.1   | 0.1   | 0.0   | 0.0   |
| Adamts9  | 11.5  | 16.4  | 14.0  | 12.9  | 17.8  | 8.9   | 15.7  | 8.0   | 11.1  | 17.9  | 13.8  | 9.7   |
| Adamtsl1 | 0.5   | 0.4   | 0.6   | 0.3   | 0.3   | 0.2   | 0.4   | 0.3   | 0.9   | 1.8   | 1.2   | 0.7   |
| Adamtsl2 | 16.9  | 37.2  | 102.2 | 11.0  | 20.8  | 9.5   | 17.7  | 74.1  | 24.0  | 5.8   | 8.3   | 20.0  |
| Adamtsl3 | 28.1  | 33.6  | 60.7  | 15.4  | 36.1  | 12.8  | 68.0  | 77.0  | 76.9  | 43.9  | 60.6  | 73.1  |
| Adamtsl4 | 3.2   | 5.5   | 5.7   | 2.5   | 3.8   | 3.7   | 7.5   | 8.8   | 6.4   | 4.3   | 4.2   | 3.8   |
| Adamtsl5 | 20.4  | 15.2  | 10.3  | 21.3  | 15.2  | 26.1  | 16.4  | 9.6   | 11.8  | 9.6   | 13.4  | 11.4  |
| Adap1    | 1.0   | 0.9   | 0.6   | 2.1   | 3.7   | 0.3   | 0.9   | 1.1   | 0.5   | 0.5   | 1.1   | 0.4   |
| Adap2    | 1.3   | 1.5   | 0.6   | 4.8   | 4.4   | 1.1   | 1.2   | 0.4   | 1.0   | 0.5   | 0.6   | 0.7   |
| Adar     | 9.4   | 7.3   | 7.0   | 9.6   | 8.3   | 7.8   | 8.0   | 6.3   | 6.9   | 6.1   | 6.5   | 8.5   |
| Adarb1   | 1.6   | 1.8   | 3.2   | 1.6   | 2.3   | 1.4   | 2.3   | 3.5   | 3.1   | 2.6   | 2.1   | 3.1   |
| Adat1    | 1.0   | 1.1   | 1.2   | 1.1   | 1.1   | 1.2   | 1.1   | 0.9   | 0.8   | 0.8   | 0.9   | 0.8   |
| Adat2    | 2.2   | 2.2   | 2.0   | 2.3   | 2.3   | 2.4   | 2.2   | 2.2   | 2.1   | 1.9   | 2.8   | 2.5   |
| Adat3    | 0.8   | 1.0   | 0.9   | 0.7   | 0.9   | 0.5   | 1.3   | 1.1   | 1.1   | 0.8   | 0.9   | 0.6   |
| Adc      | 10.5  | 11.0  | 14.3  | 8.9   | 10.6  | 9.3   | 12.0  | 15.9  | 17.2  | 12.6  | 10.3  | 13.4  |
| Adck1    | 5.4   | 5.5   | 4.5   | 4.4   | 4.8   | 5.2   | 4.9   | 4.8   | 5.2   | 5.3   | 4.5   | 4.7   |
| Adck2    | 2.2   | 2.0   | 2.0   | 1.7   | 1.7   | 2.2   | 2.1   | 2.3   | 2.3   | 2.4   | 1.8   | 1.8   |
| Adck3    | 1.8   | 1.7   | 1.7   | 1.7   | 1.6   | 1.8   | 1.2   | 2.0   | 1.7   | 2.0   | 1.8   | 2.1   |
| Adck4    | 6.2   | 6.5   | 7.7   | 5.5   | 7.3   | 5.0   | 6.3   | 8.7   | 6.8   | 7.3   | 5.4   | 7.7   |

Online Table 1

|           |       |       |       |       |       |       |       |       |       |       |       |       |
|-----------|-------|-------|-------|-------|-------|-------|-------|-------|-------|-------|-------|-------|
| Adck5     | 2.7   | 3.0   | 2.8   | 3.5   | 3.0   | 3.9   | 3.4   | 3.0   | 3.9   | 3.3   | 2.5   | 2.7   |
| Adcy1     | 2.2   | 2.1   | 1.5   | 1.2   | 1.2   | 0.8   | 2.3   | 1.5   | 2.8   | 2.2   | 2.4   | 1.6   |
| Adcy10    | 0.0   | 0.0   | 0.0   | 0.0   | 0.0   | 0.0   | 0.0   | 0.0   | 0.0   | 0.0   | 0.0   | 0.0   |
| Adcy2     | 1.2   | 0.9   | 1.4   | 2.3   | 2.2   | 0.6   | 1.0   | 0.9   | 0.8   | 0.6   | 0.6   | 0.7   |
| Adcy3     | 4.3   | 4.7   | 5.1   | 5.3   | 4.6   | 5.9   | 6.5   | 6.3   | 5.9   | 6.7   | 5.2   | 6.6   |
| Adcy4     | 0.6   | 0.6   | 0.6   | 0.8   | 0.5   | 0.5   | 0.6   | 0.8   | 0.6   | 0.6   | 0.4   | 0.6   |
| Adcy5     | 0.3   | 0.5   | 0.8   | 0.2   | 0.4   | 0.2   | 0.4   | 0.7   | 0.3   | 1.1   | 0.7   | 0.5   |
| Adcy6     | 8.5   | 9.6   | 10.0  | 8.2   | 7.9   | 8.7   | 10.5  | 8.0   | 10.5  | 9.9   | 9.4   | 8.8   |
| Adcy7     | 12.3  | 8.7   | 6.6   | 13.8  | 14.5  | 12.7  | 12.4  | 7.0   | 9.1   | 8.2   | 9.8   | 8.1   |
| Adcy8     | 0.1   | 0.1   | 0.1   | 0.1   | 0.1   | 0.3   | 0.1   | 0.0   | 0.0   | 0.1   | 0.1   | 0.0   |
| Adcy9     | 2.5   | 2.4   | 3.0   | 1.8   | 2.3   | 2.4   | 2.3   | 1.9   | 2.4   | 1.9   | 2.1   | 2.0   |
| Adcyap1r1 | 11.2  | 16.7  | 7.8   | 9.7   | 7.1   | 13.4  | 6.2   | 3.3   | 2.7   | 3.8   | 5.3   | 2.5   |
| Add1      | 70.9  | 89.7  | 108.8 | 67.4  | 81.4  | 68.0  | 98.0  | 117.9 | 99.5  | 82.0  | 93.2  | 99.7  |
| Add2      | 0.1   | 0.1   | 0.1   | 0.1   | 0.1   | 0.1   | 0.2   | 0.0   | 0.0   | 0.1   | 0.0   | 0.0   |
| Add3      | 36.6  | 34.9  | 35.9  | 32.7  | 25.0  | 28.4  | 35.6  | 41.9  | 36.1  | 30.4  | 43.4  | 36.1  |
| Adgb      | 0.2   | 0.1   | 0.1   | 0.2   | 0.2   | 0.3   | 0.1   | 0.1   | 0.0   | 0.1   | 0.2   | 0.1   |
| Adh1      | 0.8   | 0.7   | 1.6   | 0.6   | 0.2   | 0.4   | 0.1   | 0.5   | 0.1   | 0.3   | 0.7   | 0.2   |
| Adh5      | 71.3  | 60.7  | 51.0  | 66.7  | 55.1  | 68.2  | 47.8  | 47.6  | 42.6  | 60.4  | 56.3  | 53.2  |
| Adh7      | 5.1   | 2.6   | 2.3   | 5.0   | 6.3   | 5.3   | 0.4   | 2.3   | 0.2   | 0.7   | 0.8   | 0.7   |
| Adhfe1    | 1.3   | 1.0   | 1.6   | 0.6   | 1.0   | 1.2   | 0.6   | 1.2   | 0.7   | 0.8   | 0.6   | 1.0   |
| Adi1      | 6.4   | 6.9   | 6.7   | 7.3   | 7.2   | 8.9   | 6.3   | 6.7   | 5.6   | 6.8   | 7.0   | 7.4   |
| Adipor1   | 134.7 | 98.6  | 79.8  | 140.1 | 104.0 | 130.1 | 106.5 | 90.9  | 97.0  | 107.1 | 113.5 | 101.8 |
| Adipor2   | 19.3  | 20.4  | 19.1  | 17.0  | 18.5  | 17.2  | 20.9  | 22.6  | 20.4  | 19.4  | 24.2  | 18.8  |
| Adk       | 68.4  | 54.1  | 48.0  | 45.7  | 43.1  | 51.9  | 45.9  | 46.9  | 43.5  | 48.7  | 53.8  | 40.3  |
| Adm       | 270.0 | 423.3 | 472.8 | 320.8 | 304.4 | 337.7 | 307.2 | 173.5 | 253.0 | 141.2 | 144.5 | 191.0 |
| Adm2      | 0.9   | 0.5   | 0.6   | 1.0   | 0.1   | 0.9   | 0.4   | 0.3   | 0.5   | 0.5   | 0.3   | 0.4   |
| Adnp      | 5.7   | 7.0   | 7.1   | 6.4   | 6.6   | 6.3   | 6.6   | 7.3   | 6.9   | 7.2   | 7.4   | 6.9   |
| Adnp2     | 4.5   | 4.7   | 4.8   | 4.2   | 5.2   | 4.7   | 5.1   | 4.8   | 5.7   | 5.4   | 5.4   | 5.1   |
| Ado       | 10.2  | 10.8  | 11.3  | 9.5   | 11.9  | 10.6  | 13.3  | 11.5  | 13.1  | 14.7  | 12.8  | 12.4  |
| Adora1    | 0.0   | 0.0   | 0.0   | 0.0   | 0.0   | 0.0   | 0.0   | 0.1   | 0.0   | 0.0   | 0.0   | 0.0   |
| Adora2a   | 0.3   | 0.9   | 1.6   | 0.7   | 0.7   | 0.4   | 1.1   | 0.8   | 2.3   | 0.4   | 0.4   | 1.1   |
| Adora2b   | 2.7   | 7.9   | 7.0   | 1.5   | 5.5   | 1.8   | 4.7   | 3.9   | 6.1   | 3.7   | 2.6   | 5.3   |
| Adora3    | 0.4   | 0.4   | 0.5   | 0.5   | 0.8   | 0.2   | 0.5   | 0.5   | 0.5   | 1.0   | 0.7   | 0.9   |
| Adpgk     | 17.1  | 15.0  | 13.5  | 15.3  | 14.1  | 15.3  | 15.2  | 15.1  | 15.9  | 14.1  | 14.6  | 12.7  |
| Adprh     | 30.4  | 27.5  | 23.6  | 29.8  | 29.0  | 30.7  | 30.6  | 25.1  | 30.0  | 29.8  | 27.2  | 28.0  |
| Adprh2    | 9.4   | 7.8   | 6.6   | 6.3   | 7.9   | 8.2   | 6.7   | 7.3   | 8.7   | 9.6   | 7.2   | 7.1   |
| Adprm     | 8.6   | 7.8   | 7.0   | 9.1   | 7.6   | 9.3   | 6.9   | 6.9   | 7.1   | 8.3   | 7.7   | 7.5   |
| Adra1a    | 0.0   | 0.0   | 0.0   | 0.0   | 0.0   | 0.0   | 0.0   | 0.0   | 0.0   | 0.0   | 0.0   | 0.0   |
| Adra1b    | 2.0   | 1.4   | 0.4   | 2.6   | 0.4   | 2.0   | 0.7   | 0.3   | 0.6   | 0.5   | 0.6   | 0.7   |
| Adra1d    | 0.9   | 0.7   | 0.4   | 0.4   | 0.3   | 0.5   | 0.6   | 0.2   | 0.8   | 1.0   | 0.8   | 0.7   |
| Adra2a    | 0.1   | 0.0   | 0.0   | 0.0   | 0.0   | 0.0   | 0.0   | 0.0   | 0.0   | 0.2   | 0.1   | 0.1   |
| Adra2b    | 0.0   | 0.0   | 0.0   | 0.0   | 0.0   | 0.0   | 0.0   | 0.0   | 0.0   | 0.0   | 0.0   | 0.0   |
| Adrb1     | 0.0   | 0.0   | 0.0   | 0.1   | 0.2   | 0.0   | 0.1   | 0.0   | 0.0   | 0.0   | 0.0   | 0.0   |
| Adrb2     | 5.1   | 3.7   | 3.0   | 6.6   | 5.7   | 7.1   | 4.0   | 2.6   | 2.5   | 2.8   | 2.9   | 2.5   |
| Adrb3     | 0.4   | 0.4   | 0.3   | 0.3   | 0.3   | 0.2   | 0.5   | 0.2   | 0.6   | 0.2   | 0.4   | 0.1   |
| Adrbk1    | 14.7  | 14.5  | 13.1  | 16.0  | 20.3  | 13.6  | 16.0  | 13.5  | 13.7  | 12.1  | 13.7  | 11.9  |
| Adrbk2    | 0.0   | 0.1   | 0.0   | 0.1   | 0.3   | 0.0   | 0.0   | 0.0   | 0.0   | 0.0   | 0.0   | 0.0   |
| Adrm1     | 43.2  | 43.2  | 39.0  | 51.4  | 42.5  | 42.3  | 51.7  | 44.4  | 46.7  | 43.1  | 43.6  | 38.2  |
| Adsl      | 7.5   | 7.5   | 6.5   | 7.1   | 6.7   | 6.9   | 8.3   | 7.6   | 7.2   | 6.8   | 7.5   | 6.8   |
| Adss      | 26.7  | 23.6  | 22.7  | 27.9  | 24.9  | 26.3  | 24.0  | 20.8  | 23.1  | 29.1  | 29.5  | 28.5  |
| Adssl1    | 1.8   | 0.9   | 0.5   | 3.0   | 3.4   | 3.9   | 0.9   | 0.6   | 0.5   | 1.5   | 1.1   | 1.9   |
| Adtrp     | 0.3   | 0.1   | 0.1   | 0.8   | 0.3   | 0.2   | 0.1   | 0.0   | 0.1   | 0.0   | 0.0   | 0.0   |
| Aebp1     | 56.1  | 68.4  | 102.8 | 39.6  | 69.8  | 60.3  | 92.5  | 93.3  | 91.0  | 117.6 | 88.1  | 118.4 |
| Aebp2     | 21.9  | 20.3  | 21.9  | 22.5  | 23.2  | 19.7  | 27.3  | 20.5  | 22.8  | 24.2  | 22.3  | 23.3  |
| Aen       | 43.9  | 36.0  | 31.3  | 44.6  | 39.5  | 40.3  | 42.2  | 29.5  | 35.8  | 40.1  | 41.4  | 39.4  |
| Aes       | 206.0 | 165.6 | 134.2 | 237.9 | 148.4 | 236.8 | 149.0 | 148.2 | 133.9 | 132.7 | 147.4 | 129.3 |
| AF251705  | 1.4   | 0.0   | 0.0   | 12.7  | 19.3  | 0.0   | 1.9   | 0.3   | 0.4   | 1.2   | 0.6   | 1.3   |

Online Table 1

|          |       |       |       |       |       |       |       |       |       |       |       |       |
|----------|-------|-------|-------|-------|-------|-------|-------|-------|-------|-------|-------|-------|
| AF357425 | 111.2 | 143.2 | 150.1 | 236.2 | 228.1 | 0.0   | 181.2 | 326.1 | 434.8 | 651.5 | 0.0   | 0.0   |
| AF366264 | 0.0   | 0.0   | 0.0   | 0.0   | 0.0   | 0.1   | 0.0   | 0.0   | 0.0   | 0.0   | 0.0   | 0.0   |
| Afap1    | 14.7  | 15.3  | 13.5  | 17.3  | 14.1  | 16.7  | 19.4  | 14.2  | 16.2  | 15.1  | 17.7  | 14.2  |
| Afap111  | 0.8   | 0.4   | 0.5   | 0.3   | 0.2   | 0.2   | 0.4   | 0.8   | 0.6   | 0.1   | 0.2   | 0.4   |
| Afap112  | 6.8   | 4.1   | 3.7   | 5.7   | 5.0   | 3.7   | 6.2   | 3.7   | 6.1   | 6.1   | 7.5   | 6.1   |
| Aff1     | 7.6   | 10.2  | 10.2  | 7.6   | 10.7  | 6.7   | 11.4  | 9.1   | 9.9   | 8.4   | 9.0   | 9.3   |
| Aff2     | 2.0   | 1.9   | 2.2   | 1.5   | 1.1   | 1.4   | 1.1   | 1.5   | 0.9   | 1.4   | 1.1   | 1.8   |
| Aff3     | 6.4   | 5.0   | 4.7   | 5.5   | 3.9   | 5.6   | 3.6   | 3.9   | 3.3   | 2.7   | 3.0   | 3.7   |
| Aff4     | 28.1  | 29.8  | 28.6  | 25.7  | 23.4  | 28.5  | 25.0  | 25.7  | 26.0  | 25.7  | 28.3  | 29.2  |
| Afg311   | 8.1   | 8.5   | 8.8   | 10.4  | 10.0  | 8.4   | 8.9   | 9.3   | 9.1   | 8.6   | 8.5   | 8.8   |
| Afg312   | 13.3  | 13.0  | 11.1  | 15.6  | 14.8  | 15.3  | 14.7  | 11.5  | 11.5  | 13.6  | 13.5  | 13.0  |
| Afmid    | 1.1   | 1.1   | 1.4   | 1.1   | 0.8   | 0.9   | 1.0   | 1.0   | 0.8   | 1.1   | 1.1   | 0.9   |
| Afp      | 0.3   | 0.1   | 0.0   | 0.6   | 1.2   | 0.1   | 0.1   | 0.1   | 0.0   | 0.1   | 0.1   | 0.2   |
| Aftph    | 13.9  | 13.1  | 10.6  | 14.5  | 12.1  | 14.7  | 10.1  | 9.8   | 10.6  | 12.0  | 12.4  | 12.0  |
| Aga      | 116.8 | 94.6  | 89.6  | 108.1 | 84.9  | 117.5 | 69.7  | 62.3  | 63.7  | 89.9  | 84.5  | 90.0  |
| Agap1    | 3.2   | 2.5   | 2.2   | 3.3   | 2.7   | 2.6   | 2.2   | 2.0   | 2.1   | 4.0   | 3.3   | 2.3   |
| Agap2    | 0.0   | 0.0   | 0.0   | 0.2   | 0.4   | 0.0   | 0.1   | 0.0   | 0.0   | 0.1   | 0.0   | 0.0   |
| Agap3    | 10.5  | 8.4   | 8.8   | 11.0  | 10.5  | 12.5  | 10.2  | 8.4   | 9.5   | 9.1   | 8.4   | 9.1   |
| Agbl1    | 0.0   | 0.0   | 0.0   | 0.0   | 0.0   | 0.0   | 0.0   | 0.0   | 0.0   | 0.0   | 0.0   | 0.0   |
| Agbl2    | 1.0   | 1.1   | 1.2   | 0.9   | 0.8   | 1.0   | 1.0   | 0.9   | 1.1   | 0.9   | 1.0   | 1.3   |
| Agbl3    | 0.8   | 0.8   | 0.8   | 0.7   | 0.7   | 0.5   | 0.6   | 0.8   | 0.7   | 0.9   | 0.7   | 0.8   |
| Agbl4    | 0.0   | 0.0   | 0.0   | 0.0   | 0.0   | 0.0   | 0.0   | 0.0   | 0.0   | 0.0   | 0.0   | 0.0   |
| Agbl5    | 0.7   | 0.7   | 1.0   | 0.8   | 0.9   | 1.0   | 0.9   | 0.9   | 0.9   | 1.0   | 0.9   | 1.1   |
| Ager     | 1.0   | 0.6   | 0.7   | 1.6   | 1.5   | 1.5   | 0.8   | 0.4   | 0.4   | 0.1   | 0.6   | 0.4   |
| Agfg1    | 13.5  | 14.8  | 13.5  | 12.5  | 14.5  | 12.7  | 13.5  | 14.1  | 16.1  | 15.9  | 15.7  | 15.6  |
| Agfg2    | 5.3   | 7.9   | 8.1   | 4.4   | 5.5   | 5.8   | 7.6   | 9.8   | 8.9   | 5.8   | 7.6   | 5.9   |
| Aggf1    | 17.5  | 16.8  | 17.8  | 17.8  | 16.8  | 17.0  | 17.0  | 18.7  | 16.1  | 18.4  | 16.0  | 20.2  |
| Agk      | 7.1   | 8.5   | 7.9   | 7.4   | 6.8   | 7.4   | 8.9   | 8.2   | 7.5   | 6.1   | 7.0   | 7.4   |
| AgI      | 8.5   | 7.0   | 5.7   | 9.7   | 7.3   | 9.1   | 7.1   | 5.8   | 6.4   | 7.4   | 7.5   | 7.3   |
| Agmo     | 0.8   | 0.7   | 0.9   | 1.2   | 0.5   | 1.1   | 0.4   | 0.6   | 0.2   | 0.2   | 0.2   | 0.1   |
| Agpat1   | 34.8  | 34.1  | 27.4  | 37.4  | 35.0  | 38.1  | 33.2  | 30.1  | 31.6  | 31.2  | 34.8  | 28.5  |
| Agpat2   | 10.3  | 10.7  | 10.4  | 12.6  | 10.5  | 11.3  | 10.0  | 10.9  | 10.3  | 9.3   | 7.6   | 8.4   |
| Agpat3   | 29.8  | 26.7  | 26.5  | 31.5  | 26.0  | 32.8  | 31.6  | 28.6  | 28.2  | 27.0  | 30.5  | 30.1  |
| Agpat4   | 17.1  | 13.2  | 12.0  | 13.5  | 12.9  | 14.9  | 11.5  | 10.6  | 9.9   | 13.4  | 11.6  | 13.5  |
| Agpat5   | 7.3   | 6.2   | 5.2   | 5.5   | 6.2   | 6.1   | 5.4   | 4.8   | 5.5   | 6.4   | 6.4   | 6.1   |
| Agpat6   | 22.6  | 20.7  | 20.2  | 23.0  | 21.4  | 21.0  | 23.8  | 23.8  | 22.6  | 21.3  | 23.3  | 22.4  |
| Agpat9   | 0.5   | 0.3   | 0.3   | 0.7   | 0.4   | 0.7   | 0.5   | 0.5   | 0.7   | 0.5   | 0.6   | 0.5   |
| Agphd1   | 1.7   | 2.4   | 2.5   | 2.0   | 1.9   | 2.1   | 2.1   | 2.2   | 1.9   | 2.1   | 2.5   | 2.3   |
| Agps     | 10.5  | 10.9  | 9.9   | 9.4   | 11.5  | 8.7   | 10.6  | 11.6  | 11.6  | 10.3  | 13.0  | 11.5  |
| Agrn     | 4.2   | 4.3   | 5.5   | 3.6   | 4.2   | 3.5   | 3.6   | 4.7   | 4.4   | 5.3   | 3.1   | 3.9   |
| Agrp     | 0.1   | 0.1   | 0.0   | 0.0   | 0.0   | 0.2   | 0.2   | 0.1   | 0.0   | 0.0   | 0.0   | 0.1   |
| Agt      | 0.2   | 0.5   | 0.6   | 0.5   | 1.0   | 0.2   | 0.4   | 0.8   | 0.7   | 0.4   | 0.6   | 0.4   |
| Agtppb1  | 12.0  | 12.0  | 12.5  | 12.6  | 11.3  | 10.4  | 11.3  | 9.8   | 9.9   | 10.2  | 11.1  | 11.9  |
| Agtr1a   | 0.2   | 0.2   | 0.3   | 0.7   | 0.2   | 0.1   | 0.1   | 0.3   | 0.6   | 1.6   | 1.1   | 0.4   |
| Agtr1b   | 0.0   | 0.0   | 0.0   | 0.0   | 0.0   | 0.0   | 0.0   | 0.0   | 0.0   | 0.0   | 0.0   | 0.0   |
| Agtr2    | 0.0   | 0.0   | 0.0   | 0.0   | 0.0   | 0.0   | 0.0   | 0.0   | 0.0   | 0.0   | 0.1   | 0.0   |
| Agtrap   | 9.3   | 7.7   | 8.4   | 9.6   | 8.2   | 7.9   | 9.3   | 8.6   | 9.0   | 8.5   | 8.5   | 9.9   |
| Agxt     | 0.0   | 0.1   | 0.0   | 0.0   | 0.0   | 0.0   | 0.0   | 0.0   | 0.2   | 0.1   | 0.0   | 0.1   |
| Agxt212  | 4.0   | 3.8   | 3.7   | 3.6   | 3.2   | 4.0   | 3.6   | 3.6   | 3.4   | 3.1   | 4.1   | 3.4   |
| Ahctf1   | 10.4  | 10.8  | 11.0  | 10.3  | 10.6  | 9.9   | 11.3  | 11.9  | 12.1  | 11.0  | 12.4  | 11.2  |
| Ahcy     | 18.1  | 16.5  | 18.0  | 17.3  | 18.4  | 18.8  | 19.3  | 15.6  | 15.9  | 21.2  | 19.7  | 17.2  |
| Ahcyl1   | 56.8  | 62.9  | 58.4  | 60.2  | 63.7  | 64.3  | 57.9  | 51.4  | 53.4  | 59.7  | 62.7  | 56.5  |
| Ahcyl2   | 6.9   | 5.4   | 4.1   | 7.9   | 6.0   | 5.8   | 4.1   | 4.0   | 4.2   | 6.0   | 5.0   | 5.0   |
| Ahdc1    | 1.7   | 2.8   | 2.6   | 1.5   | 2.1   | 2.0   | 2.7   | 2.7   | 2.8   | 2.6   | 2.0   | 1.9   |
| Ahi1     | 5.5   | 5.0   | 5.1   | 4.8   | 4.2   | 6.0   | 4.0   | 4.2   | 3.0   | 4.3   | 4.9   | 4.3   |
| Ahnak    | 463.3 | 476.3 | 416.9 | 384.4 | 345.7 | 473.9 | 419.3 | 482.0 | 413.0 | 384.5 | 501.6 | 463.1 |
| Ahr      | 2.7   | 2.3   | 3.4   | 1.1   | 2.2   | 1.2   | 2.2   | 3.0   | 4.5   | 10.9  | 5.6   | 8.2   |

Online Table 1

|          |       |       |       |       |       |       |       |       |       |       |       |       |
|----------|-------|-------|-------|-------|-------|-------|-------|-------|-------|-------|-------|-------|
| Ahrr     | 0.3   | 0.2   | 0.1   | 0.5   | 0.1   | 0.3   | 0.3   | 0.3   | 0.2   | 0.3   | 0.2   | 0.2   |
| Ahsa1    | 91.4  | 97.9  | 88.4  | 113.6 | 90.3  | 85.7  | 86.7  | 76.6  | 78.6  | 88.6  | 101.6 | 94.9  |
| Ahsa2    | 22.7  | 24.9  | 21.0  | 19.5  | 19.6  | 20.4  | 18.7  | 17.3  | 20.4  | 23.6  | 24.8  | 21.6  |
| Ahsg     | 0.0   | 0.1   | 0.1   | 0.0   | 0.0   | 0.0   | 0.0   | 0.0   | 0.0   | 0.2   | 0.2   | 0.0   |
| AI115009 | 0.2   | 0.0   | 0.1   | 0.1   | 0.1   | 0.3   | 0.3   | 0.1   | 0.1   | 0.2   | 0.3   | 0.3   |
| AI118078 | 0.0   | 0.0   | 0.0   | 0.0   | 0.0   | 0.1   | 0.0   | 0.0   | 0.0   | 0.0   | 0.0   | 0.0   |
| AI182371 | 0.2   | 0.1   | 0.3   | 0.0   | 0.1   | 0.2   | 0.1   | 0.2   | 0.4   | 0.0   | 0.0   | 0.1   |
| AI197445 | 0.1   | 0.1   | 0.1   | 0.0   | 0.1   | 0.0   | 0.1   | 0.1   | 0.0   | 0.0   | 0.0   | 0.0   |
| AI314180 | 21.6  | 22.8  | 20.1  | 21.1  | 20.3  | 21.7  | 19.5  | 21.5  | 20.5  | 20.1  | 21.0  | 21.5  |
| AI314831 | 0.0   | 0.0   | 0.0   | 0.0   | 0.0   | 0.0   | 0.0   | 0.0   | 0.1   | 0.3   | 0.1   | 0.1   |
| AI316807 | 14.8  | 12.7  | 11.1  | 19.3  | 11.3  | 16.2  | 11.9  | 12.7  | 11.4  | 11.1  | 13.5  | 13.2  |
| AI317395 | 0.6   | 0.4   | 0.4   | 0.5   | 0.3   | 0.7   | 0.2   | 0.5   | 0.2   | 0.2   | 0.3   | 0.3   |
| AI413582 | 20.6  | 17.0  | 11.6  | 26.6  | 25.1  | 24.9  | 16.4  | 12.4  | 10.9  | 19.0  | 12.8  | 13.8  |
| AI414108 | 1.5   | 1.2   | 0.7   | 1.1   | 0.9   | 1.0   | 0.7   | 0.2   | 0.4   | 0.9   | 1.0   | 0.8   |
| AI427809 | 1.0   | 0.6   | 0.6   | 1.7   | 1.3   | 1.2   | 0.6   | 0.4   | 0.6   | 0.7   | 0.6   | 0.7   |
| AI429214 | 1.9   | 1.6   | 2.1   | 1.6   | 1.1   | 1.9   | 1.1   | 1.9   | 1.9   | 1.4   | 1.7   | 2.0   |
| AI450353 | 0.1   | 0.3   | 0.7   | 0.2   | 0.4   | 0.3   | 0.5   | 0.3   | 0.4   | 0.3   | 0.1   | 0.3   |
| AI462493 | 17.7  | 15.7  | 17.0  | 17.9  | 15.8  | 19.1  | 15.7  | 15.7  | 19.6  | 23.7  | 18.0  | 21.7  |
| AI463170 | 0.1   | 0.0   | 0.0   | 0.0   | 0.1   | 0.0   | 0.4   | 0.3   | 0.2   | 0.5   | 0.0   | 0.2   |
| AI464131 | 3.2   | 3.6   | 3.8   | 2.4   | 2.6   | 3.2   | 3.5   | 5.2   | 4.2   | 3.2   | 3.6   | 3.1   |
| AI467606 | 0.2   | 0.0   | 0.0   | 1.6   | 2.2   | 0.0   | 0.2   | 0.0   | 0.0   | 0.1   | 0.0   | 0.2   |
| AI480653 | 12.4  | 9.4   | 7.7   | 11.1  | 11.0  | 13.3  | 11.3  | 8.7   | 9.9   | 9.8   | 9.1   | 9.4   |
| AI504432 | 0.0   | 0.0   | 0.0   | 0.2   | 0.3   | 0.0   | 0.0   | 0.0   | 0.0   | 0.0   | 0.0   | 0.0   |
| AI506816 | 0.5   | 2.4   | 0.8   | 4.9   | 0.7   | 0.7   | 10.3  | 8.7   | 1.2   | 5.7   | 9.5   | 0.4   |
| AI507597 | 0.0   | 0.1   | 0.0   | 0.1   | 0.2   | 0.0   | 0.0   | 0.0   | 0.0   | 0.1   | 0.0   | 0.0   |
| AI597468 | 14.3  | 17.5  | 17.4  | 15.1  | 16.4  | 16.9  | 16.8  | 18.7  | 20.2  | 18.9  | 22.2  | 21.0  |
| AI597479 | 14.7  | 14.4  | 12.7  | 17.3  | 12.7  | 18.2  | 11.6  | 9.9   | 11.0  | 14.0  | 14.0  | 14.4  |
| AI607873 | 0.7   | 0.4   | 0.7   | 2.9   | 2.1   | 0.5   | 0.5   | 0.4   | 0.2   | 0.3   | 0.4   | 0.6   |
| AI661453 | 0.0   | 0.1   | 0.1   | 0.1   | 0.1   | 0.0   | 0.0   | 0.0   | 0.0   | 0.1   | 0.0   | 0.0   |
| AI662270 | 0.6   | 0.1   | 0.1   | 2.8   | 5.5   | 0.0   | 0.8   | 0.1   | 0.2   | 0.6   | 0.5   | 0.6   |
| AI837181 | 9.9   | 8.5   | 8.9   | 9.7   | 9.6   | 9.2   | 9.0   | 11.4  | 9.8   | 11.3  | 10.9  | 9.0   |
| AI846148 | 6.6   | 6.6   | 4.9   | 3.9   | 5.0   | 5.1   | 6.8   | 5.4   | 6.0   | 6.1   | 6.6   | 5.7   |
| AI848285 | 0.1   | 0.0   | 0.0   | 0.0   | 0.0   | 0.0   | 0.1   | 0.0   | 0.1   | 0.0   | 0.0   | 0.0   |
| AI854703 | 0.0   | 0.1   | 0.2   | 0.1   | 0.1   | 0.1   | 0.0   | 0.0   | 0.1   | 0.0   | 0.1   | 0.1   |
| AI987944 | 8.9   | 9.1   | 11.1  | 9.0   | 8.5   | 9.7   | 8.3   | 8.8   | 8.2   | 8.3   | 11.1  | 11.0  |
| Aida     | 33.6  | 32.2  | 29.8  | 50.9  | 34.3  | 40.8  | 37.4  | 28.2  | 29.7  | 25.9  | 35.1  | 33.6  |
| Aif1     | 1.3   | 0.1   | 0.0   | 8.3   | 11.1  | 0.2   | 0.9   | 0.0   | 0.6   | 0.6   | 0.7   | 1.3   |
| Aif1l    | 1.8   | 0.7   | 0.5   | 1.1   | 0.6   | 1.2   | 0.9   | 1.1   | 1.3   | 4.2   | 3.2   | 1.8   |
| Aifm1    | 10.7  | 11.7  | 13.8  | 9.5   | 10.0  | 10.1  | 10.9  | 12.5  | 10.0  | 12.4  | 12.0  | 12.7  |
| Aifm2    | 8.1   | 6.7   | 5.9   | 8.3   | 6.2   | 8.0   | 7.1   | 6.0   | 7.7   | 6.9   | 7.9   | 6.9   |
| Aifm3    | 0.0   | 0.0   | 0.1   | 0.0   | 0.0   | 0.1   | 0.0   | 0.0   | 0.0   | 0.0   | 0.0   | 0.0   |
| Aig1     | 5.8   | 4.2   | 3.5   | 4.0   | 4.4   | 6.3   | 4.9   | 5.2   | 5.4   | 7.6   | 7.6   | 4.1   |
| Aim1     | 0.2   | 0.1   | 0.2   | 0.5   | 0.8   | 0.1   | 0.2   | 0.2   | 0.2   | 0.3   | 0.2   | 0.2   |
| Aim1l    | 0.0   | 0.0   | 0.0   | 0.0   | 0.0   | 0.0   | 0.0   | 0.0   | 0.0   | 0.0   | 0.0   | 0.0   |
| Aim2     | 4.2   | 3.4   | 3.6   | 5.9   | 6.0   | 3.9   | 6.0   | 2.9   | 3.1   | 1.4   | 2.6   | 2.9   |
| Aimp1    | 57.7  | 47.3  | 39.6  | 48.5  | 43.5  | 57.3  | 42.4  | 42.1  | 41.3  | 51.1  | 49.0  | 48.0  |
| Aimp2    | 17.1  | 15.8  | 13.5  | 19.2  | 15.6  | 15.1  | 19.6  | 13.9  | 17.0  | 16.5  | 16.9  | 14.1  |
| Aip      | 18.2  | 17.8  | 19.6  | 25.0  | 20.6  | 21.9  | 19.5  | 20.5  | 18.1  | 19.4  | 18.4  | 19.4  |
| Aipl1    | 0.1   | 0.2   | 0.3   | 0.0   | 0.3   | 0.2   | 0.2   | 0.1   | 0.1   | 0.1   | 0.0   | 0.1   |
| Airn     | 1.8   | 2.3   | 2.1   | 0.9   | 1.4   | 0.9   | 3.0   | 1.5   | 1.8   | 3.1   | 0.9   | 2.5   |
| Ajuba    | 10.9  | 8.1   | 5.4   | 10.0  | 6.9   | 8.6   | 8.0   | 7.5   | 10.1  | 12.9  | 11.2  | 8.0   |
| AK010878 | 2.3   | 2.1   | 2.6   | 2.6   | 2.9   | 2.3   | 2.1   | 2.5   | 2.0   | 3.7   | 2.0   | 2.2   |
| Ak1      | 126.1 | 133.0 | 136.3 | 127.8 | 139.3 | 127.1 | 175.5 | 156.7 | 165.9 | 148.7 | 162.6 | 144.8 |
| AK129341 | 1.2   | 0.7   | 0.5   | 2.1   | 0.8   | 1.4   | 0.5   | 0.4   | 0.4   | 0.7   | 0.9   | 0.6   |
| Ak2      | 16.9  | 17.7  | 17.3  | 18.3  | 19.5  | 16.0  | 21.0  | 21.2  | 18.8  | 18.6  | 22.2  | 19.8  |
| Ak3      | 44.3  | 50.8  | 48.7  | 40.9  | 37.7  | 43.9  | 37.1  | 46.0  | 40.8  | 38.4  | 46.4  | 42.7  |
| Ak4      | 8.2   | 8.9   | 5.4   | 6.8   | 8.0   | 10.3  | 7.1   | 3.5   | 5.4   | 6.5   | 5.7   | 5.7   |

Online Table 1

|          |        |        |        |        |        |        |       |       |       |       |       |       |
|----------|--------|--------|--------|--------|--------|--------|-------|-------|-------|-------|-------|-------|
| Ak5      | 4.4    | 7.0    | 7.7    | 5.3    | 6.0    | 7.3    | 7.9   | 5.7   | 7.1   | 10.9  | 10.7  | 9.5   |
| Ak7      | 0.1    | 0.0    | 0.1    | 0.0    | 0.0    | 0.1    | 0.1   | 0.0   | 0.0   | 0.0   | 0.0   | 0.0   |
| Ak8      | 0.5    | 0.2    | 0.5    | 0.3    | 0.3    | 0.6    | 0.1   | 0.2   | 0.3   | 0.1   | 0.3   | 0.1   |
| Akap1    | 9.4    | 9.4    | 8.4    | 10.2   | 8.9    | 10.9   | 9.2   | 7.2   | 8.0   | 9.4   | 9.3   | 8.7   |
| Akap10   | 7.8    | 8.6    | 7.7    | 9.0    | 9.4    | 7.7    | 7.3   | 7.5   | 8.1   | 8.0   | 7.7   | 7.4   |
| Akap11   | 10.5   | 10.8   | 10.1   | 10.2   | 9.9    | 11.1   | 9.5   | 8.8   | 9.5   | 11.1  | 11.2  | 11.3  |
| Akap12   | 113.0  | 113.8  | 112.5  | 138.4  | 136.2  | 139.7  | 179.0 | 112.3 | 120.9 | 119.7 | 161.9 | 122.4 |
| Akap13   | 11.3   | 12.7   | 13.0   | 12.0   | 12.3   | 9.5    | 14.2  | 12.2  | 12.1  | 9.8   | 11.0  | 12.5  |
| Akap14   | 0.0    | 0.0    | 0.0    | 0.0    | 0.0    | 0.0    | 0.0   | 0.0   | 0.0   | 0.0   | 0.0   | 0.0   |
| Akap17b  | 2.9    | 3.7    | 3.5    | 3.4    | 2.5    | 2.9    | 2.4   | 2.3   | 2.7   | 2.4   | 3.1   | 3.2   |
| Akap2    | 121.9  | 125.8  | 110.9  | 113.0  | 98.8   | 89.6   | 97.5  | 79.2  | 90.5  | 91.1  | 112.2 | 123.9 |
| Akap3    | 0.1    | 0.0    | 0.0    | 0.2    | 0.2    | 0.0    | 0.1   | 0.0   | 0.0   | 0.0   | 0.0   | 0.1   |
| Akap5    | 2.2    | 0.6    | 0.5    | 1.5    | 0.7    | 1.3    | 1.0   | 0.4   | 1.0   | 11.4  | 5.1   | 4.0   |
| Akap6    | 1.4    | 1.1    | 1.3    | 1.9    | 1.2    | 1.0    | 0.8   | 1.2   | 0.8   | 0.5   | 0.6   | 0.7   |
| Akap7    | 5.2    | 5.0    | 5.4    | 4.9    | 4.0    | 6.3    | 5.7   | 4.4   | 4.1   | 4.2   | 4.9   | 5.9   |
| Akap8    | 8.4    | 8.2    | 10.1   | 9.7    | 9.9    | 7.9    | 11.3  | 9.0   | 9.3   | 9.3   | 9.6   | 10.8  |
| Akap8l   | 18.4   | 17.0   | 17.0   | 19.1   | 13.6   | 18.4   | 15.4  | 13.8  | 14.2  | 18.9  | 15.9  | 16.4  |
| Akap9    | 12.5   | 11.8   | 11.1   | 13.7   | 9.8    | 13.1   | 10.9  | 10.3  | 9.1   | 9.9   | 12.3  | 12.4  |
| Akip1    | 21.8   | 22.3   | 18.5   | 22.7   | 17.5   | 17.9   | 15.9  | 17.5  | 17.4  | 14.6  | 17.9  | 17.4  |
| Akirin1  | 25.6   | 24.2   | 20.5   | 34.4   | 26.8   | 28.3   | 24.0  | 20.0  | 21.5  | 22.5  | 26.6  | 25.3  |
| Akirin2  | 30.9   | 30.2   | 28.1   | 29.5   | 28.9   | 28.7   | 28.2  | 26.0  | 30.8  | 29.6  | 29.5  | 29.3  |
| Akna     | 0.9    | 0.7    | 0.7    | 1.7    | 2.8    | 0.9    | 1.3   | 1.3   | 1.0   | 0.5   | 0.7   | 0.6   |
| Aknad1   | 0.0    | 0.0    | 0.0    | 0.1    | 0.0    | 0.0    | 0.0   | 0.0   | 0.0   | 0.0   | 0.0   | 0.0   |
| Akr1a1   | 283.1  | 223.6  | 186.9  | 377.1  | 380.4  | 285.8  | 228.6 | 233.9 | 223.8 | 253.9 | 243.9 | 236.1 |
| Akr1b10  | 19.6   | 17.7   | 15.5   | 23.3   | 21.8   | 22.7   | 15.5  | 12.9  | 13.1  | 21.6  | 17.7  | 16.8  |
| Akr1b3   | 7.8    | 5.6    | 7.1    | 6.0    | 8.3    | 9.3    | 5.2   | 10.7  | 14.0  | 6.8   | 3.4   | 6.4   |
| Akr1b7   | 0.1    | 0.1    | 0.0    | 0.1    | 0.0    | 0.1    | 0.0   | 0.0   | 0.0   | 0.1   | 0.1   | 0.1   |
| Akr1b8   | 51.6   | 39.6   | 36.3   | 68.1   | 63.8   | 55.7   | 54.6  | 52.6  | 44.4  | 38.7  | 44.8  | 40.4  |
| Akr1c12  | 2.0    | 1.7    | 1.4    | 3.7    | 3.4    | 1.8    | 1.3   | 0.9   | 0.4   | 0.7   | 0.7   | 0.8   |
| Akr1c13  | 14.0   | 10.6   | 7.7    | 18.0   | 14.9   | 10.7   | 5.0   | 4.8   | 2.7   | 3.7   | 4.6   | 5.1   |
| Akr1c14  | 14.6   | 14.0   | 14.4   | 11.3   | 7.6    | 12.5   | 3.7   | 8.4   | 4.4   | 7.5   | 8.1   | 9.4   |
| Akr1c18  | 0.2    | 0.0    | 0.0    | 0.3    | 0.0    | 0.0    | 0.0   | 0.0   | 0.0   | 0.2   | 0.1   | 0.0   |
| Akr1c19  | 0.3    | 0.4    | 0.6    | 0.0    | 0.1    | 0.1    | 0.1   | 0.0   | 0.1   | 0.1   | 0.1   | 0.1   |
| Akr1cl   | 0.1    | 0.0    | 0.0    | 0.0    | 0.1    | 0.2    | 0.1   | 0.1   | 0.0   | 0.0   | 0.0   | 0.0   |
| Akr1e1   | 19.8   | 19.3   | 20.3   | 18.7   | 15.0   | 18.8   | 17.8  | 18.0  | 16.2  | 18.2  | 17.0  | 21.2  |
| Akr7a5   | 14.8   | 13.9   | 10.4   | 11.5   | 9.9    | 14.1   | 11.5  | 11.9  | 11.0  | 15.1  | 12.5  | 11.5  |
| Akt1     | 77.2   | 68.8   | 62.6   | 84.3   | 75.1   | 74.6   | 93.1  | 74.8  | 75.7  | 75.3  | 86.7  | 76.3  |
| Akt1s1   | 42.0   | 30.6   | 29.5   | 46.8   | 31.1   | 44.8   | 34.7  | 34.1  | 29.3  | 39.2  | 34.6  | 32.2  |
| Akt2     | 36.3   | 33.8   | 34.1   | 36.8   | 28.8   | 35.9   | 30.9  | 31.8  | 30.8  | 34.3  | 33.2  | 32.6  |
| Akt3     | 13.4   | 18.4   | 16.1   | 15.6   | 10.7   | 19.9   | 11.5  | 11.9  | 11.4  | 10.6  | 12.5  | 12.9  |
| Aktip    | 43.5   | 35.3   | 31.5   | 55.6   | 28.7   | 58.5   | 31.9  | 24.3  | 26.4  | 27.0  | 35.0  | 31.9  |
| Alad     | 2.9    | 3.1    | 2.7    | 2.8    | 2.8    | 3.4    | 2.6   | 2.5   | 2.3   | 4.8   | 3.3   | 2.3   |
| Alas1    | 48.8   | 53.3   | 45.1   | 70.3   | 51.5   | 53.1   | 25.9  | 33.4  | 21.7  | 24.4  | 25.9  | 25.2  |
| Alas2    | 0.1    | 0.1    | 0.1    | 0.0    | 0.1    | 0.2    | 0.1   | 0.0   | 0.1   | 0.7   | 0.4   | 0.1   |
| Alcam    | 3.2    | 1.5    | 1.0    | 11.3   | 14.3   | 2.3    | 3.5   | 1.8   | 2.4   | 3.4   | 3.8   | 3.0   |
| Aldh16a1 | 4.5    | 5.2    | 4.4    | 4.3    | 5.8    | 3.9    | 5.2   | 5.2   | 5.1   | 4.9   | 3.9   | 4.5   |
| Aldh18a1 | 31.7   | 23.0   | 19.7   | 25.7   | 22.4   | 25.0   | 25.8  | 34.6  | 28.5  | 22.4  | 29.8  | 20.9  |
| Aldh1a1  | 1447.1 | 1418.0 | 1053.5 | 1493.7 | 1015.5 | 1495.7 | 648.3 | 532.5 | 505.1 | 846.5 | 812.4 | 736.2 |
| Aldh1a2  | 14.4   | 33.2   | 65.5   | 13.9   | 41.4   | 8.5    | 28.0  | 34.7  | 25.2  | 46.6  | 20.9  | 38.4  |
| Aldh1a3  | 17.6   | 47.5   | 73.3   | 11.0   | 28.0   | 21.2   | 30.7  | 145.4 | 30.5  | 90.8  | 117.7 | 86.1  |
| Aldh1a7  | 18.4   | 18.0   | 14.0   | 17.2   | 13.8   | 19.4   | 9.5   | 8.6   | 8.3   | 10.4  | 9.2   | 10.4  |
| Aldh1b1  | 2.1    | 1.4    | 1.1    | 1.8    | 1.3    | 2.2    | 1.5   | 0.7   | 1.0   | 1.5   | 1.2   | 1.5   |
| Aldh1l1  | 5.2    | 8.0    | 11.6   | 2.5    | 5.0    | 3.0    | 6.2   | 8.7   | 6.5   | 3.9   | 5.8   | 6.3   |
| Aldh1l2  | 9.3    | 5.6    | 6.2    | 8.6    | 3.8    | 10.3   | 6.6   | 18.5  | 8.9   | 4.7   | 10.5  | 6.1   |
| Aldh2    | 136.5  | 116.1  | 97.2   | 145.2  | 124.0  | 149.0  | 87.3  | 90.1  | 82.7  | 102.6 | 86.4  | 89.3  |
| Aldh3a1  | 10.3   | 7.2    | 10.1   | 3.0    | 2.1    | 3.9    | 0.7   | 4.7   | 0.5   | 0.9   | 0.7   | 1.8   |
| Aldh3a2  | 33.4   | 28.5   | 24.3   | 30.2   | 26.1   | 31.0   | 23.9  | 24.9  | 25.7  | 26.0  | 25.5  | 25.9  |

Online Table 1

|           |       |       |       |       |       |       |       |       |       |       |       |       |
|-----------|-------|-------|-------|-------|-------|-------|-------|-------|-------|-------|-------|-------|
| Aldh3b1   | 9.1   | 6.8   | 7.2   | 11.9  | 11.1  | 8.9   | 4.9   | 6.6   | 5.5   | 5.9   | 5.5   | 4.9   |
| Aldh3b2   | 0.0   | 0.0   | 0.1   | 0.0   | 0.0   | 0.0   | 0.0   | 0.0   | 0.0   | 0.0   | 0.0   | 0.0   |
| Aldh4a1   | 10.0  | 10.3  | 10.0  | 6.8   | 10.2  | 10.9  | 9.4   | 8.4   | 9.3   | 11.1  | 9.6   | 8.9   |
| Aldh5a1   | 1.5   | 1.6   | 1.5   | 1.0   | 1.0   | 1.7   | 0.9   | 1.5   | 1.2   | 1.1   | 1.1   | 1.3   |
| Aldh6a1   | 17.7  | 21.3  | 24.0  | 16.2  | 14.9  | 19.3  | 13.4  | 18.1  | 16.0  | 23.1  | 20.9  | 21.2  |
| Aldh7a1   | 28.5  | 25.0  | 29.8  | 24.0  | 21.5  | 26.1  | 24.0  | 24.3  | 22.4  | 33.3  | 26.8  | 26.6  |
| Aldh8a1   | 0.0   | 0.0   | 0.0   | 0.0   | 0.0   | 0.0   | 0.0   | 0.0   | 0.0   | 0.0   | 0.0   | 0.0   |
| Aldh9a1   | 5.1   | 5.0   | 5.3   | 6.0   | 6.7   | 6.3   | 4.9   | 5.8   | 4.9   | 5.5   | 5.0   | 5.0   |
| Aldoa     | 543.3 | 457.2 | 371.2 | 734.0 | 585.8 | 680.1 | 482.5 | 443.9 | 404.1 | 453.0 | 451.5 | 451.9 |
| Aldoart1  | 0.2   | 0.2   | 0.1   | 0.3   | 0.2   | 0.2   | 0.2   | 0.1   | 0.1   | 0.1   | 0.2   | 0.1   |
| Aldoart2  | 0.1   | 0.0   | 0.0   | 0.1   | 0.0   | 0.0   | 0.0   | 0.0   | 0.0   | 0.0   | 0.0   | 0.0   |
| Aldob     | 0.0   | 0.0   | 0.0   | 0.1   | 0.0   | 0.0   | 0.0   | 0.0   | 0.0   | 0.0   | 0.0   | 0.0   |
| Aldoc     | 0.9   | 0.3   | 0.1   | 1.0   | 2.9   | 0.2   | 0.5   | 0.7   | 0.2   | 0.9   | 0.7   | 0.3   |
| Alg1      | 12.7  | 12.3  | 10.3  | 12.2  | 11.6  | 11.5  | 9.5   | 12.1  | 12.3  | 12.6  | 11.0  | 11.0  |
| Alg10b    | 11.3  | 12.1  | 12.7  | 12.0  | 12.9  | 13.4  | 12.0  | 12.7  | 13.0  | 12.8  | 14.1  | 13.2  |
| Alg11     | 7.2   | 8.1   | 7.1   | 7.9   | 7.8   | 7.6   | 8.4   | 7.9   | 8.5   | 8.1   | 8.2   | 8.2   |
| Alg12     | 4.4   | 3.6   | 3.7   | 4.8   | 3.6   | 3.5   | 3.4   | 4.3   | 3.9   | 3.4   | 4.1   | 3.3   |
| Alg13     | 1.4   | 2.1   | 1.6   | 1.3   | 2.5   | 1.7   | 1.8   | 1.5   | 1.5   | 1.4   | 1.7   | 1.2   |
| Alg14     | 32.7  | 24.7  | 25.9  | 37.2  | 26.1  | 32.6  | 34.1  | 26.7  | 30.2  | 22.7  | 31.3  | 28.1  |
| Alg2      | 6.0   | 6.6   | 6.1   | 6.1   | 6.7   | 6.3   | 5.8   | 6.7   | 6.5   | 7.2   | 6.5   | 6.6   |
| Alg3      | 5.2   | 6.2   | 6.1   | 8.7   | 6.6   | 7.1   | 8.0   | 7.9   | 5.2   | 4.6   | 6.8   | 4.8   |
| Alg5      | 22.2  | 16.4  | 18.4  | 23.6  | 19.6  | 21.0  | 25.0  | 21.9  | 20.8  | 23.4  | 25.0  | 22.7  |
| Alg6      | 1.1   | 1.2   | 1.8   | 1.1   | 1.1   | 1.1   | 1.0   | 1.4   | 1.3   | 0.8   | 1.0   | 1.2   |
| Alg8      | 3.1   | 3.2   | 3.1   | 4.1   | 4.1   | 2.5   | 3.9   | 3.2   | 3.3   | 3.2   | 3.7   | 2.8   |
| Alg9      | 7.1   | 8.5   | 7.3   | 7.6   | 7.8   | 7.4   | 9.4   | 9.1   | 9.6   | 6.9   | 9.1   | 7.5   |
| Alk       | 0.0   | 0.0   | 0.0   | 0.0   | 0.0   | 0.0   | 0.0   | 0.0   | 0.0   | 0.0   | 0.0   | 0.0   |
| Alkbh1    | 4.3   | 4.1   | 4.1   | 5.0   | 5.0   | 3.9   | 5.0   | 4.0   | 4.3   | 4.4   | 5.2   | 4.5   |
| Alkbh2    | 5.0   | 3.5   | 4.1   | 5.4   | 4.9   | 4.2   | 4.5   | 4.4   | 4.9   | 5.7   | 5.4   | 4.8   |
| Alkbh3    | 16.1  | 15.1  | 15.8  | 20.5  | 13.6  | 15.9  | 15.3  | 16.4  | 12.8  | 14.0  | 16.9  | 16.4  |
| Alkbh4    | 1.8   | 1.7   | 1.5   | 1.8   | 1.8   | 1.9   | 2.1   | 1.5   | 2.1   | 2.2   | 1.3   | 1.5   |
| Alkbh5    | 12.3  | 12.6  | 11.6  | 11.4  | 13.2  | 13.0  | 12.4  | 11.7  | 13.6  | 13.5  | 11.7  | 12.3  |
| Alkbh6    | 10.8  | 10.3  | 6.9   | 13.1  | 7.5   | 10.9  | 7.0   | 8.2   | 8.0   | 8.9   | 6.7   | 9.2   |
| Alkbh7    | 6.9   | 7.4   | 4.6   | 5.1   | 5.4   | 4.6   | 4.6   | 5.5   | 7.8   | 6.2   | 5.8   | 6.7   |
| Alkbh8    | 4.4   | 3.3   | 4.0   | 3.7   | 3.1   | 4.3   | 2.8   | 3.2   | 3.4   | 4.4   | 3.2   | 4.1   |
| Alms1     | 1.4   | 1.8   | 2.1   | 1.0   | 1.2   | 1.5   | 1.1   | 1.8   | 1.4   | 1.9   | 1.7   | 1.6   |
| Alms1-ps2 | 0.4   | 0.7   | 0.7   | 0.3   | 0.5   | 0.6   | 0.4   | 0.7   | 0.5   | 0.7   | 0.6   | 0.6   |
| Alox12    | 0.0   | 0.1   | 0.0   | 0.0   | 0.1   | 0.1   | 0.1   | 0.1   | 0.0   | 0.0   | 0.0   | 0.0   |
| Alox5     | 1.5   | 0.8   | 0.6   | 2.2   | 3.7   | 0.7   | 0.7   | 0.1   | 0.1   | 0.2   | 0.4   | 0.3   |
| Alox5ap   | 5.1   | 0.2   | 0.3   | 34.3  | 66.1  | 0.1   | 5.0   | 1.5   | 1.4   | 3.9   | 1.0   | 1.9   |
| Alox8     | 0.0   | 0.0   | 0.0   | 0.0   | 0.0   | 0.1   | 0.0   | 0.1   | 0.0   | 0.1   | 0.0   | 0.0   |
| Aloxe3    | 0.0   | 0.0   | 0.0   | 0.1   | 0.0   | 0.0   | 0.0   | 0.0   | 0.0   | 0.1   | 0.0   | 0.0   |
| Alpk1     | 4.7   | 7.0   | 9.7   | 3.3   | 6.3   | 3.7   | 6.6   | 5.9   | 6.1   | 4.7   | 5.5   | 6.4   |
| Alpk2     | 0.0   | 0.0   | 0.0   | 0.0   | 0.0   | 0.0   | 0.0   | 0.0   | 0.0   | 0.0   | 0.0   | 0.0   |
| Alpk3     | 0.1   | 0.2   | 0.2   | 0.1   | 0.1   | 0.0   | 0.1   | 0.2   | 0.1   | 0.1   | 0.1   | 0.1   |
| Alpl      | 1.6   | 3.2   | 3.8   | 0.9   | 1.3   | 0.2   | 0.7   | 1.9   | 0.6   | 0.8   | 1.0   | 1.8   |
| Als2      | 5.3   | 5.4   | 4.6   | 4.7   | 4.9   | 4.9   | 5.0   | 5.2   | 4.8   | 4.0   | 5.0   | 4.5   |
| Als2cl    | 1.3   | 0.9   | 0.8   | 1.1   | 1.0   | 0.8   | 0.9   | 0.9   | 0.7   | 0.4   | 0.4   | 0.5   |
| Als2cr12  | 0.2   | 0.1   | 0.1   | 0.1   | 0.2   | 0.1   | 0.3   | 0.0   | 0.1   | 0.2   | 0.2   | 0.1   |
| Alx1      | 0.0   | 0.0   | 0.0   | 0.0   | 0.0   | 0.0   | 0.0   | 0.0   | 0.0   | 0.1   | 0.4   | 0.0   |
| Alx3      | 0.0   | 0.0   | 0.4   | 0.0   | 0.0   | 0.0   | 0.0   | 0.0   | 0.0   | 0.1   | 0.1   | 0.0   |
| Alx4      | 0.3   | 0.4   | 0.4   | 0.2   | 0.2   | 0.3   | 0.2   | 0.1   | 0.2   | 0.2   | 0.2   | 0.2   |
| Alyref    | 30.6  | 26.8  | 30.9  | 30.9  | 33.2  | 28.7  | 39.0  | 33.4  | 33.2  | 32.0  | 33.8  | 33.2  |
| Alyref2   | 0.9   | 0.8   | 1.4   | 1.3   | 1.4   | 0.7   | 1.4   | 1.5   | 1.3   | 1.8   | 2.2   | 1.6   |
| Amacr     | 4.5   | 4.4   | 3.4   | 3.3   | 3.9   | 4.0   | 3.9   | 4.6   | 4.8   | 4.2   | 4.3   | 4.4   |
| Ambp      | 0.1   | 0.0   | 0.0   | 0.2   | 0.6   | 0.0   | 0.1   | 0.0   | 0.1   | 0.2   | 0.1   | 0.0   |
| Ambra1    | 4.4   | 4.9   | 4.8   | 4.1   | 4.7   | 4.7   | 5.3   | 5.4   | 4.9   | 4.6   | 4.4   | 4.6   |
| Amd1      | 0.0   | 0.0   | 0.0   | 5.9   | 3.4   | 0.0   | 0.0   | 0.0   | 0.0   | 0.0   | 0.0   | 0.0   |

Online Table 1

|          |      |      |      |      |      |      |      |       |       |       |      |      |
|----------|------|------|------|------|------|------|------|-------|-------|-------|------|------|
| Amd2     | 20.4 | 19.1 | 18.1 | 14.1 | 19.3 | 21.0 | 18.2 | 20.4  | 19.0  | 21.2  | 20.9 | 17.5 |
| Amdhd1   | 0.1  | 0.0  | 0.0  | 0.0  | 0.0  | 0.0  | 0.0  | 0.0   | 0.0   | 0.0   | 0.0  | 0.0  |
| Amdhd2   | 10.2 | 9.4  | 8.9  | 9.5  | 10.0 | 11.9 | 7.8  | 10.0  | 8.7   | 8.0   | 6.9  | 8.7  |
| Amer1    | 2.0  | 2.5  | 2.6  | 1.5  | 1.4  | 1.8  | 1.9  | 2.7   | 2.4   | 2.4   | 2.6  | 2.4  |
| Amfr     | 70.4 | 62.1 | 48.7 | 67.8 | 58.5 | 72.2 | 65.2 | 55.6  | 65.9  | 64.8  | 64.8 | 61.9 |
| Amh      | 0.1  | 0.1  | 0.0  | 0.0  | 0.1  | 0.2  | 0.1  | 0.0   | 0.1   | 0.0   | 0.0  | 0.1  |
| Amhr2    | 0.1  | 0.0  | 0.0  | 0.0  | 0.0  | 0.2  | 0.0  | 0.0   | 0.1   | 0.2   | 0.0  | 0.1  |
| Amica1   | 0.2  | 0.1  | 0.1  | 0.2  | 0.3  | 0.3  | 0.0  | 0.0   | 0.0   | 0.1   | 0.0  | 0.0  |
| Amigo1   | 1.4  | 1.6  | 1.6  | 1.8  | 1.3  | 2.5  | 1.8  | 1.1   | 1.6   | 1.1   | 1.3  | 1.4  |
| Amigo2   | 0.5  | 0.4  | 0.2  | 0.7  | 0.4  | 0.8  | 0.4  | 0.5   | 0.4   | 1.3   | 0.5  | 0.5  |
| Amigo3   | 0.8  | 0.9  | 0.8  | 0.7  | 1.0  | 0.6  | 0.9  | 1.0   | 1.0   | 1.0   | 0.7  | 0.8  |
| Ammecr1  | 3.1  | 2.9  | 3.0  | 3.1  | 3.9  | 2.3  | 4.2  | 4.0   | 3.9   | 5.2   | 5.3  | 5.3  |
| Ammecr1l | 6.2  | 6.4  | 6.0  | 6.3  | 6.8  | 5.9  | 6.4  | 6.4   | 6.5   | 7.0   | 6.4  | 6.3  |
| Amn      | 0.0  | 0.0  | 0.1  | 0.0  | 0.1  | 0.1  | 0.0  | 0.0   | 0.1   | 0.1   | 0.0  | 0.0  |
| Amn1     | 8.5  | 8.2  | 6.6  | 7.3  | 6.9  | 7.0  | 6.9  | 6.1   | 9.7   | 9.4   | 8.6  | 9.5  |
| Amot     | 3.4  | 2.6  | 1.8  | 4.2  | 2.4  | 4.0  | 1.9  | 1.4   | 1.2   | 2.5   | 2.5  | 1.5  |
| Amotl1   | 31.0 | 24.7 | 19.6 | 36.9 | 23.1 | 34.9 | 23.4 | 16.6  | 19.3  | 22.9  | 24.5 | 22.1 |
| Amotl2   | 65.8 | 87.2 | 95.8 | 69.7 | 67.8 | 79.3 | 98.7 | 104.4 | 103.8 | 106.0 | 86.8 | 89.7 |
| Ampd1    | 0.0  | 0.0  | 0.0  | 0.1  | 0.0  | 0.0  | 0.0  | 0.0   | 0.0   | 0.0   | 0.1  | 0.0  |
| Ampd2    | 9.1  | 9.8  | 9.2  | 7.7  | 10.6 | 9.8  | 9.3  | 8.6   | 9.2   | 9.0   | 8.6  | 8.7  |
| Ampd3    | 8.9  | 8.3  | 5.3  | 18.1 | 12.8 | 17.9 | 6.2  | 4.2   | 3.4   | 3.4   | 3.3  | 3.0  |
| Amph     | 0.1  | 0.0  | 0.0  | 0.0  | 0.0  | 0.0  | 0.0  | 0.0   | 0.0   | 0.0   | 0.0  | 0.0  |
| Amt      | 0.9  | 0.8  | 0.9  | 0.8  | 0.6  | 1.1  | 0.6  | 1.3   | 0.9   | 0.4   | 0.5  | 0.4  |
| Amy1     | 0.8  | 0.3  | 0.5  | 0.4  | 0.2  | 0.3  | 0.4  | 0.4   | 0.1   | 0.1   | 0.3  | 0.2  |
| Amy2a2   | 0.0  | 0.0  | 0.0  | 0.0  | 0.0  | 0.0  | 0.0  | 0.0   | 0.0   | 0.0   | 0.0  | 0.0  |
| Amy2a4   | 0.0  | 0.0  | 0.0  | 0.0  | 0.0  | 0.0  | 0.0  | 0.0   | 0.0   | 0.0   | 0.0  | 0.0  |
| Amz1     | 0.6  | 0.3  | 0.1  | 1.8  | 1.9  | 0.9  | 0.4  | 0.1   | 0.2   | 0.3   | 0.4  | 0.2  |
| Amz2     | 12.7 | 12.6 | 10.8 | 11.4 | 9.9  | 14.5 | 9.9  | 12.2  | 11.4  | 10.3  | 11.4 | 11.0 |
| Anapc1   | 20.2 | 20.0 | 18.4 | 18.3 | 18.2 | 19.9 | 18.0 | 18.7  | 17.5  | 21.7  | 20.8 | 17.9 |
| Anapc10  | 6.3  | 6.1  | 6.9  | 6.6  | 5.4  | 5.5  | 6.4  | 5.8   | 5.0   | 5.5   | 6.7  | 7.3  |
| Anapc11  | 6.1  | 6.5  | 4.5  | 6.7  | 6.7  | 7.7  | 5.4  | 5.6   | 6.4   | 7.0   | 5.7  | 6.3  |
| Anapc13  | 63.2 | 65.8 | 69.0 | 71.4 | 54.8 | 72.8 | 64.5 | 69.7  | 61.6  | 72.2  | 85.7 | 87.1 |
| Anapc15  | 20.3 | 19.8 | 15.9 | 28.0 | 19.0 | 20.4 | 20.9 | 16.6  | 16.4  | 19.3  | 21.7 | 20.9 |
| Anapc16  | 31.1 | 20.7 | 18.8 | 31.9 | 23.5 | 28.8 | 25.2 | 23.4  | 24.8  | 25.5  | 25.8 | 24.6 |
| Anapc2   | 19.5 | 21.3 | 21.2 | 18.5 | 22.9 | 20.0 | 20.3 | 21.8  | 18.6  | 19.6  | 19.1 | 20.2 |
| Anapc4   | 36.2 | 31.9 | 30.6 | 32.6 | 31.1 | 33.9 | 31.1 | 32.2  | 31.8  | 32.8  | 33.9 | 34.4 |
| Anapc5   | 75.7 | 68.6 | 66.5 | 69.8 | 61.7 | 70.2 | 68.5 | 73.8  | 72.5  | 54.9  | 70.4 | 62.8 |
| Anapc7   | 11.4 | 11.3 | 11.8 | 10.9 | 11.3 | 11.2 | 11.0 | 11.2  | 10.9  | 10.3  | 10.1 | 11.4 |
| Ang      | 9.9  | 10.2 | 11.9 | 10.1 | 11.5 | 8.1  | 12.4 | 14.2  | 11.0  | 8.8   | 12.3 | 8.8  |
| Ang2     | 0.0  | 0.3  | 0.0  | 0.0  | 0.0  | 0.0  | 0.2  | 0.4   | 0.2   | 0.2   | 0.2  | 0.3  |
| Angel1   | 0.6  | 0.9  | 0.8  | 0.5  | 0.6  | 0.6  | 0.7  | 0.8   | 0.6   | 0.6   | 0.5  | 0.8  |
| Angel2   | 11.5 | 11.9 | 10.9 | 8.9  | 9.5  | 9.6  | 10.4 | 11.6  | 10.7  | 10.9  | 11.9 | 10.6 |
| Angpt1   | 0.4  | 0.8  | 1.4  | 0.4  | 0.7  | 0.3  | 1.2  | 1.5   | 1.3   | 1.8   | 0.8  | 1.9  |
| Angpt2   | 5.9  | 2.0  | 3.0  | 1.8  | 0.7  | 1.0  | 2.9  | 4.6   | 4.1   | 1.7   | 1.2  | 2.9  |
| Angpt4   | 10.0 | 9.2  | 8.6  | 14.6 | 11.2 | 17.3 | 7.0  | 5.7   | 7.0   | 7.3   | 4.9  | 9.2  |
| Angptl1  | 1.6  | 1.7  | 1.8  | 2.8  | 1.4  | 0.8  | 2.3  | 1.9   | 1.6   | 2.8   | 5.9  | 1.2  |
| Angptl2  | 25.1 | 21.3 | 22.6 | 29.6 | 38.8 | 38.0 | 27.4 | 29.0  | 17.7  | 20.8  | 21.8 | 19.2 |
| Angptl3  | 0.1  | 0.0  | 0.1  | 0.2  | 0.0  | 0.1  | 0.0  | 0.0   | 0.0   | 0.0   | 0.0  | 0.0  |
| Angptl4  | 16.2 | 5.6  | 8.8  | 18.6 | 27.4 | 5.7  | 13.6 | 30.3  | 11.0  | 40.2  | 10.6 | 22.8 |
| Angptl6  | 2.1  | 0.9  | 0.7  | 2.1  | 0.6  | 2.5  | 0.7  | 1.2   | 1.0   | 0.8   | 1.4  | 0.9  |
| Angptl7  | 9.4  | 4.5  | 12.7 | 1.7  | 0.9  | 0.7  | 2.0  | 6.5   | 5.0   | 84.8  | 24.8 | 18.7 |
| Ank      | 14.3 | 12.4 | 10.4 | 15.4 | 12.9 | 17.5 | 13.2 | 9.8   | 11.0  | 12.3  | 12.8 | 11.1 |
| Ank1     | 0.5  | 0.3  | 0.3  | 0.6  | 0.3  | 0.7  | 0.3  | 0.2   | 0.2   | 0.4   | 0.3  | 0.3  |
| Ank2     | 11.4 | 9.4  | 10.4 | 10.3 | 7.5  | 10.1 | 8.1  | 9.6   | 6.4   | 4.6   | 7.2  | 5.5  |
| Ank3     | 0.6  | 0.4  | 0.4  | 0.5  | 0.4  | 0.3  | 0.4  | 0.3   | 0.3   | 0.2   | 0.3  | 0.3  |
| Ankar    | 0.0  | 0.0  | 0.0  | 0.0  | 0.0  | 0.0  | 0.0  | 0.0   | 0.0   | 0.0   | 0.0  | 0.0  |
| Ankdd1b  | 0.3  | 0.3  | 0.3  | 0.5  | 0.3  | 0.3  | 0.3  | 0.4   | 0.3   | 0.4   | 0.5  | 0.5  |

Online Table 1



|          |       |       |       |        |       |       |       |       |       |       |       |       |
|----------|-------|-------|-------|--------|-------|-------|-------|-------|-------|-------|-------|-------|
| Ankef1   | 0.3   | 0.2   | 0.2   | 0.2    | 0.1   | 0.2   | 0.2   | 0.1   | 0.1   | 0.1   | 0.1   | 0.2   |
| Ankfy1   | 16.9  | 16.1  | 14.9  | 17.5   | 17.2  | 16.2  | 13.9  | 13.4  | 13.7  | 13.5  | 14.7  | 14.7  |
| Ankhd1   | 6.0   | 5.9   | 6.5   | 6.8    | 6.2   | 6.1   | 6.4   | 6.9   | 5.4   | 5.1   | 6.7   | 6.8   |
| Ankib1   | 31.2  | 34.3  | 29.9  | 31.2   | 25.9  | 33.2  | 29.5  | 25.9  | 34.8  | 26.8  | 33.1  | 36.5  |
| Ankk1    | 0.0   | 0.0   | 0.0   | 0.0    | 0.0   | 0.0   | 0.0   | 0.0   | 0.0   | 0.0   | 0.0   | 0.0   |
| Ankle1   | 0.4   | 1.0   | 1.5   | 0.1    | 1.3   | 0.2   | 1.9   | 0.6   | 1.6   | 0.5   | 0.7   | 0.4   |
| Ankle2   | 10.2  | 10.8  | 10.8  | 10.0   | 9.6   | 11.4  | 10.9  | 10.0  | 9.9   | 10.3  | 11.1  | 11.0  |
| Ankmy1   | 0.1   | 0.1   | 0.0   | 0.0    | 0.1   | 0.1   | 0.0   | 0.0   | 0.1   | 0.0   | 0.0   | 0.0   |
| Ankmy2   | 9.9   | 9.3   | 9.4   | 7.7    | 6.5   | 8.7   | 8.6   | 9.7   | 8.4   | 8.5   | 9.3   | 9.7   |
| Ankra2   | 10.5  | 11.5  | 9.3   | 12.8   | 9.2   | 11.2  | 11.0  | 9.4   | 9.3   | 8.5   | 10.1  | 9.9   |
| Ankrd1   | 517.7 | 346.6 | 184.2 | 1121.4 | 436.2 | 684.2 | 466.8 | 100.5 | 195.5 | 313.9 | 381.7 | 266.6 |
| Ankrd10  | 3.6   | 4.1   | 3.9   | 4.1    | 5.1   | 4.3   | 4.4   | 5.1   | 5.8   | 6.3   | 6.1   | 4.4   |
| Ankrd11  | 17.3  | 20.4  | 22.3  | 20.6   | 18.3  | 16.9  | 26.5  | 20.6  | 19.8  | 16.6  | 22.8  | 22.0  |
| Ankrd12  | 7.4   | 8.4   | 9.5   | 10.2   | 7.7   | 9.2   | 9.0   | 7.3   | 6.7   | 8.5   | 10.3  | 11.2  |
| Ankrd13a | 29.4  | 26.7  | 25.4  | 33.4   | 31.8  | 29.5  | 32.2  | 23.8  | 28.4  | 25.7  | 29.7  | 29.9  |
| Ankrd13b | 1.6   | 1.9   | 1.9   | 2.3    | 1.9   | 2.1   | 2.1   | 1.7   | 1.9   | 1.5   | 1.6   | 1.4   |
| Ankrd13c | 20.8  | 19.2  | 17.6  | 21.5   | 18.5  | 19.7  | 18.1  | 16.4  | 15.9  | 18.6  | 20.8  | 19.0  |
| Ankrd13d | 2.4   | 2.1   | 1.8   | 1.7    | 1.9   | 3.0   | 1.6   | 0.7   | 1.2   | 1.8   | 1.4   | 1.6   |
| Ankrd16  | 2.4   | 2.5   | 2.1   | 3.1    | 2.7   | 2.4   | 2.7   | 2.5   | 2.7   | 2.7   | 2.1   | 2.1   |
| Ankrd17  | 13.6  | 14.4  | 15.8  | 14.2   | 14.2  | 13.2  | 16.2  | 15.9  | 12.9  | 13.0  | 15.3  | 15.0  |
| Ankrd2   | 0.0   | 0.0   | 0.1   | 0.1    | 0.0   | 0.0   | 0.0   | 0.0   | 0.0   | 0.0   | 0.1   | 0.0   |
| Ankrd23  | 0.8   | 1.1   | 0.9   | 0.8    | 0.7   | 1.0   | 0.9   | 1.1   | 1.0   | 0.8   | 0.9   | 0.7   |
| Ankrd24  | 0.9   | 1.2   | 1.0   | 1.1    | 0.8   | 1.4   | 0.9   | 1.0   | 0.8   | 0.6   | 0.8   | 0.9   |
| Ankrd26  | 3.1   | 3.6   | 3.8   | 3.1    | 3.1   | 2.9   | 3.5   | 2.7   | 2.7   | 3.3   | 4.0   | 3.6   |
| Ankrd27  | 18.2  | 16.9  | 14.9  | 19.1   | 14.5  | 17.8  | 16.4  | 15.2  | 15.8  | 12.5  | 17.9  | 14.9  |
| Ankrd28  | 12.1  | 10.6  | 10.0  | 13.1   | 12.2  | 14.5  | 7.9   | 6.6   | 6.7   | 9.2   | 7.5   | 8.8   |
| Ankrd29  | 0.9   | 1.1   | 1.1   | 0.9    | 0.9   | 1.2   | 1.0   | 0.8   | 0.7   | 0.9   | 1.3   | 0.9   |
| Ankrd32  | 2.5   | 3.5   | 3.5   | 2.4    | 3.0   | 2.6   | 2.7   | 2.6   | 3.0   | 3.3   | 3.5   | 3.8   |
| Ankrd33  | 0.0   | 0.1   | 0.1   | 0.0    | 0.0   | 0.0   | 0.1   | 0.0   | 0.0   | 0.0   | 0.0   | 0.0   |
| Ankrd33b | 0.0   | 0.1   | 0.0   | 0.1    | 0.3   | 0.0   | 0.1   | 0.1   | 0.1   | 0.1   | 0.1   | 0.1   |
| Ankrd34a | 0.2   | 0.4   | 0.4   | 0.3    | 0.3   | 0.3   | 0.3   | 0.3   | 0.2   | 0.6   | 0.3   | 0.4   |
| Ankrd34c | 0.1   | 0.1   | 0.0   | 0.0    | 0.0   | 0.0   | 0.0   | 0.0   | 0.0   | 0.0   | 0.0   | 0.0   |
| Ankrd35  | 0.3   | 0.4   | 0.6   | 0.1    | 0.1   | 0.2   | 0.2   | 0.4   | 0.2   | 0.3   | 0.2   | 0.4   |
| Ankrd37  | 0.6   | 0.6   | 0.5   | 1.0    | 0.9   | 1.3   | 0.8   | 0.9   | 1.2   | 1.0   | 1.6   | 1.3   |
| Ankrd39  | 3.3   | 3.2   | 2.8   | 2.3    | 2.7   | 3.1   | 3.4   | 2.4   | 3.5   | 2.8   | 2.3   | 2.7   |
| Ankrd40  | 30.3  | 31.4  | 35.9  | 47.2   | 30.6  | 34.1  | 36.3  | 31.1  | 28.9  | 25.6  | 30.5  | 34.8  |
| Ankrd42  | 5.1   | 5.0   | 4.7   | 5.6    | 3.8   | 6.5   | 4.9   | 3.8   | 4.2   | 4.3   | 5.3   | 5.5   |
| Ankrd44  | 2.9   | 4.0   | 4.8   | 2.5    | 4.3   | 2.7   | 3.1   | 3.2   | 3.6   | 3.9   | 4.5   | 3.8   |
| Ankrd46  | 21.6  | 19.5  | 17.9  | 18.7   | 15.5  | 20.6  | 17.2  | 17.5  | 17.3  | 18.5  | 18.9  | 19.0  |
| Ankrd49  | 6.1   | 5.6   | 5.9   | 6.6    | 6.3   | 5.3   | 6.3   | 6.7   | 5.9   | 5.9   | 7.2   | 6.4   |
| Ankrd50  | 8.9   | 9.7   | 8.9   | 7.0    | 10.3  | 7.0   | 10.3  | 9.4   | 10.3  | 11.3  | 9.6   | 9.5   |
| Ankrd52  | 4.8   | 4.8   | 4.4   | 4.8    | 5.3   | 4.6   | 5.4   | 5.2   | 4.9   | 4.4   | 4.7   | 4.2   |
| Ankrd53  | 0.0   | 0.0   | 0.0   | 0.0    | 0.1   | 0.0   | 0.0   | 0.0   | 0.0   | 0.1   | 0.0   | 0.0   |
| Ankrd54  | 7.5   | 9.2   | 8.8   | 6.9    | 7.6   | 7.0   | 8.0   | 8.4   | 8.1   | 7.3   | 7.7   | 8.1   |
| Ankrd55  | 2.9   | 4.8   | 8.6   | 2.0    | 3.1   | 2.4   | 2.5   | 5.6   | 4.5   | 0.9   | 1.6   | 3.7   |
| Ankrd6   | 0.7   | 1.0   | 0.8   | 0.7    | 1.1   | 1.4   | 0.7   | 0.8   | 0.6   | 0.4   | 0.4   | 0.6   |
| Ankrd61  | 0.0   | 0.1   | 0.2   | 0.0    | 0.1   | 0.3   | 0.1   | 0.1   | 0.1   | 0.1   | 0.3   | 0.1   |
| Ankrd9   | 1.5   | 1.5   | 1.2   | 1.8    | 1.3   | 1.4   | 1.4   | 1.7   | 1.3   | 0.9   | 1.3   | 0.8   |
| Anks1    | 3.8   | 4.4   | 4.2   | 3.4    | 3.6   | 3.4   | 3.8   | 4.0   | 4.2   | 4.1   | 3.6   | 3.4   |
| Anks1b   | 1.3   | 1.3   | 1.2   | 0.6    | 1.0   | 0.7   | 1.0   | 0.4   | 0.6   | 0.5   | 0.6   | 0.5   |
| Anks3    | 11.1  | 9.9   | 9.1   | 12.2   | 9.7   | 12.0  | 11.6  | 11.0  | 12.1  | 10.4  | 11.3  | 11.7  |
| Anks6    | 0.9   | 1.3   | 1.3   | 1.3    | 1.3   | 1.3   | 1.6   | 1.4   | 1.3   | 1.8   | 1.2   | 1.1   |
| Ankzf1   | 5.9   | 8.2   | 7.1   | 5.5    | 6.4   | 7.1   | 6.3   | 6.8   | 6.9   | 5.4   | 5.9   | 6.1   |
| Anln     | 4.9   | 7.9   | 11.3  | 1.7    | 10.4  | 1.6   | 14.0  | 4.7   | 10.2  | 6.4   | 11.0  | 7.0   |
| Ano1     | 1.5   | 0.4   | 0.4   | 0.2    | 0.1   | 0.1   | 0.1   | 0.5   | 0.1   | 0.1   | 0.1   | 0.4   |
| Ano10    | 34.9  | 29.9  | 25.1  | 33.8   | 28.8  | 33.0  | 32.7  | 27.1  | 29.0  | 32.1  | 34.0  | 31.2  |
| Ano2     | 0.0   | 0.0   | 0.0   | 0.1    | 0.1   | 0.0   | 0.0   | 0.0   | 0.0   | 0.0   | 0.0   | 0.0   |

Online Table 1

|        |        |        |       |        |        |        |        |       |       |        |        |        |
|--------|--------|--------|-------|--------|--------|--------|--------|-------|-------|--------|--------|--------|
| Ano3   | 9.2    | 7.4    | 6.9   | 6.4    | 7.2    | 8.8    | 6.5    | 4.6   | 5.3   | 7.1    | 8.4    | 7.2    |
| Ano4   | 0.0    | 0.1    | 0.1   | 0.0    | 0.1    | 0.1    | 0.0    | 0.1   | 0.0   | 0.0    | 0.1    | 0.1    |
| Ano5   | 0.0    | 0.0    | 0.0   | 0.0    | 0.0    | 0.0    | 0.0    | 0.0   | 0.0   | 0.0    | 0.0    | 0.0    |
| Ano6   | 24.6   | 24.1   | 24.4  | 23.8   | 25.1   | 21.9   | 29.1   | 24.7  | 25.6  | 30.0   | 30.8   | 28.5   |
| Ano7   | 0.1    | 0.0    | 0.1   | 0.1    | 0.1    | 0.1    | 0.1    | 0.1   | 0.1   | 0.1    | 0.2    | 0.0    |
| Ano8   | 4.4    | 3.6    | 3.7   | 4.0    | 3.7    | 3.9    | 5.0    | 4.4   | 4.9   | 3.9    | 3.4    | 3.8    |
| Anp32a | 20.8   | 19.4   | 29.4  | 26.5   | 22.6   | 26.1   | 25.6   | 30.0  | 20.9  | 29.4   | 31.1   | 34.6   |
| Anp32b | 42.0   | 38.4   | 56.3  | 53.5   | 41.7   | 45.5   | 48.6   | 48.1  | 29.5  | 32.5   | 41.3   | 46.2   |
| Anp32e | 7.8    | 7.4    | 9.9   | 11.4   | 8.6    | 9.5    | 10.1   | 8.0   | 7.2   | 9.1    | 11.0   | 9.8    |
| Anpep  | 0.7    | 1.0    | 1.6   | 5.0    | 4.1    | 1.1    | 0.6    | 1.3   | 0.7   | 0.7    | 0.5    | 0.7    |
| Antxr1 | 12.7   | 16.1   | 22.1  | 13.5   | 14.7   | 14.2   | 16.3   | 22.8  | 21.7  | 21.2   | 17.7   | 22.5   |
| Antxr2 | 13.3   | 13.3   | 13.2  | 16.1   | 15.9   | 14.3   | 13.0   | 17.1  | 15.1  | 15.0   | 14.3   | 13.6   |
| Anxa1  | 1974.6 | 1389.0 | 806.6 | 1704.8 | 1127.8 | 1410.6 | 1164.1 | 524.6 | 999.2 | 1147.7 | 1342.4 | 1245.7 |
| Anxa11 | 7.2    | 8.0    | 8.7   | 8.7    | 8.4    | 7.4    | 7.4    | 7.1   | 7.9   | 7.5    | 7.3    | 7.2    |
| Anxa2  | 658.1  | 505.7  | 438.0 | 640.3  | 568.8  | 526.2  | 651.6  | 641.0 | 540.8 | 640.3  | 680.3  | 517.8  |
| Anxa3  | 337.6  | 258.0  | 178.4 | 302.8  | 205.2  | 316.4  | 199.4  | 151.9 | 200.6 | 218.1  | 240.3  | 194.7  |
| Anxa4  | 37.1   | 36.3   | 40.4  | 52.2   | 49.1   | 40.9   | 30.8   | 47.0  | 33.0  | 32.6   | 37.2   | 41.4   |
| Anxa5  | 374.2  | 210.2  | 159.5 | 373.3  | 252.7  | 345.1  | 192.2  | 175.3 | 164.2 | 217.0  | 257.9  | 268.9  |
| Anxa6  | 94.4   | 96.0   | 90.9  | 103.9  | 97.4   | 92.6   | 105.4  | 87.5  | 108.7 | 96.1   | 110.3  | 101.0  |
| Anxa7  | 59.3   | 54.9   | 60.3  | 69.5   | 57.5   | 58.7   | 64.9   | 64.4  | 56.3  | 54.2   | 60.7   | 63.3   |
| Anxa8  | 27.6   | 15.5   | 15.5  | 10.4   | 11.7   | 6.7    | 11.5   | 19.2  | 8.0   | 10.1   | 14.5   | 13.9   |
| Anxa9  | 0.6    | 0.6    | 0.5   | 0.9    | 0.6    | 1.0    | 0.4    | 0.9   | 0.5   | 0.8    | 0.4    | 0.5    |
| Aoah   | 0.4    | 0.0    | 0.0   | 2.3    | 4.1    | 0.0    | 0.6    | 0.0   | 0.1   | 0.3    | 0.1    | 0.2    |
| Aoc2   | 0.3    | 0.4    | 0.2   | 0.5    | 0.4    | 0.5    | 0.3    | 0.3   | 0.2   | 0.3    | 0.2    | 0.3    |
| Aoc3   | 0.1    | 0.4    | 0.8   | 0.1    | 0.4    | 0.0    | 0.4    | 0.9   | 1.1   | 0.9    | 0.9    | 0.5    |
| Aox1   | 20.3   | 18.9   | 10.3  | 29.8   | 19.1   | 29.4   | 5.6    | 5.1   | 3.9   | 11.5   | 7.4    | 6.1    |
| Aox3   | 0.0    | 0.1    | 0.0   | 0.0    | 0.0    | 0.0    | 0.0    | 0.1   | 0.0   | 0.2    | 0.3    | 0.1    |
| Aox3l1 | 0.0    | 0.0    | 0.0   | 0.0    | 0.0    | 0.0    | 0.0    | 0.0   | 0.0   | 0.0    | 0.0    | 0.0    |
| Aox4   | 0.0    | 0.0    | 0.0   | 0.0    | 0.0    | 0.0    | 0.0    | 0.0   | 0.0   | 0.0    | 0.0    | 0.0    |
| Ap1ar  | 15.0   | 15.5   | 16.7  | 16.4   | 14.2   | 15.5   | 15.6   | 14.8  | 14.1  | 15.3   | 16.5   | 16.1   |
| Ap1b1  | 17.5   | 15.4   | 13.3  | 17.9   | 18.7   | 16.4   | 14.6   | 15.6  | 13.9  | 15.5   | 14.8   | 14.7   |
| Ap1g1  | 12.9   | 14.0   | 12.5  | 14.4   | 13.5   | 13.8   | 12.3   | 12.2  | 12.0  | 13.2   | 13.3   | 12.3   |
| Ap1g2  | 2.4    | 3.5    | 2.8   | 3.1    | 3.0    | 2.6    | 2.2    | 2.6   | 2.7   | 1.8    | 2.7    | 2.2    |
| Ap1m1  | 10.6   | 9.7    | 8.8   | 10.3   | 11.5   | 8.6    | 11.1   | 11.2  | 11.4  | 10.9   | 9.8    | 10.4   |
| Ap1m2  | 0.0    | 0.0    | 0.1   | 0.0    | 0.0    | 0.0    | 0.0    | 0.0   | 0.0   | 0.0    | 0.0    | 0.0    |
| Ap1s1  | 38.4   | 40.4   | 31.8  | 43.8   | 45.9   | 37.3   | 41.5   | 42.6  | 42.4  | 42.3   | 40.9   | 33.1   |
| Ap1s2  | 2.7    | 2.9    | 3.6   | 6.4    | 8.4    | 3.3    | 3.6    | 3.2   | 4.0   | 3.4    | 4.0    | 3.5    |
| Ap1s3  | 1.2    | 1.4    | 1.3   | 1.2    | 1.4    | 1.1    | 1.1    | 1.0   | 1.1   | 0.9    | 0.9    | 0.9    |
| Ap2a1  | 20.8   | 21.5   | 19.7  | 21.4   | 20.4   | 23.6   | 22.8   | 22.3  | 21.5  | 19.4   | 20.5   | 17.7   |
| Ap2a2  | 75.4   | 75.4   | 57.7  | 59.9   | 56.7   | 56.6   | 78.8   | 75.9  | 97.8  | 71.8   | 85.3   | 81.0   |
| Ap2b1  | 40.9   | 39.0   | 38.4  | 39.7   | 40.7   | 37.8   | 37.4   | 40.4  | 36.8  | 34.7   | 38.6   | 38.2   |
| Ap2m1  | 98.7   | 89.1   | 88.4  | 104.3  | 87.9   | 95.8   | 95.3   | 101.8 | 95.7  | 85.2   | 95.4   | 94.6   |
| Ap2s1  | 84.2   | 70.9   | 67.4  | 80.9   | 88.5   | 73.1   | 73.8   | 84.4  | 79.5  | 94.5   | 74.4   | 79.2   |
| Ap3b1  | 28.1   | 25.3   | 27.2  | 30.9   | 26.4   | 29.8   | 25.6   | 25.9  | 22.8  | 24.7   | 30.7   | 31.2   |
| Ap3b2  | 0.1    | 0.0    | 0.0   | 0.0    | 0.0    | 0.0    | 0.0    | 0.0   | 0.0   | 0.0    | 0.1    | 0.0    |
| Ap3d1  | 39.0   | 36.7   | 34.1  | 45.7   | 36.9   | 37.6   | 44.4   | 38.9  | 36.2  | 35.4   | 41.4   | 41.5   |
| Ap3m1  | 20.1   | 17.7   | 16.8  | 18.9   | 18.1   | 18.8   | 16.8   | 20.6  | 17.2  | 18.0   | 21.1   | 19.2   |
| Ap3m2  | 9.7    | 7.7    | 7.4   | 11.5   | 7.9    | 12.3   | 8.4    | 6.2   | 6.2   | 6.4    | 7.5    | 8.5    |
| Ap3s1  | 56.0   | 58.1   | 72.5  | 72.4   | 54.9   | 71.9   | 63.8   | 52.9  | 62.7  | 61.5   | 75.3   | 80.6   |
| Ap3s2  | 4.4    | 3.7    | 3.2   | 4.3    | 3.6    | 3.6    | 2.9    | 3.8   | 3.3   | 3.9    | 3.7    | 3.1    |
| Ap4b1  | 11.3   | 11.0   | 9.0   | 8.9    | 9.3    | 9.8    | 9.8    | 10.1  | 11.1  | 12.0   | 10.7   | 10.8   |
| Ap4e1  | 2.8    | 3.8    | 3.5   | 2.8    | 3.4    | 2.8    | 2.9    | 3.1   | 3.8   | 3.3    | 3.4    | 3.2    |
| Ap4m1  | 5.1    | 4.9    | 5.3   | 3.2    | 4.8    | 4.0    | 4.6    | 4.8   | 4.9   | 4.3    | 5.2    | 4.9    |
| Ap4s1  | 6.7    | 6.4    | 5.5   | 6.5    | 7.4    | 6.8    | 5.0    | 5.9   | 7.7   | 6.7    | 6.7    | 6.5    |
| Ap5b1  | 1.4    | 1.3    | 1.1   | 1.8    | 2.9    | 1.2    | 1.1    | 1.5   | 1.3   | 1.4    | 1.1    | 1.3    |
| Ap5m1  | 3.8    | 3.8    | 4.4   | 3.9    | 4.3    | 3.7    | 3.3    | 3.7   | 4.3   | 4.1    | 3.8    | 4.4    |
| Ap5s1  | 3.0    | 4.4    | 4.3   | 3.8    | 3.5    | 4.4    | 3.1    | 3.6   | 2.9   | 2.7    | 2.5    | 2.9    |

Online Table 1

|         |       |       |       |       |       |       |       |       |       |       |       |       |
|---------|-------|-------|-------|-------|-------|-------|-------|-------|-------|-------|-------|-------|
| Ap5z1   | 3.9   | 3.4   | 3.0   | 4.3   | 3.9   | 3.8   | 3.2   | 3.4   | 3.5   | 3.9   | 2.9   | 3.2   |
| Apaf1   | 9.4   | 10.4  | 9.1   | 8.0   | 10.0  | 7.4   | 8.2   | 9.0   | 10.4  | 9.2   | 9.1   | 8.5   |
| Apba1   | 1.9   | 3.1   | 4.4   | 1.9   | 2.8   | 1.9   | 3.9   | 3.9   | 3.1   | 2.0   | 2.5   | 3.0   |
| Apba2   | 0.0   | 0.1   | 0.1   | 0.0   | 0.1   | 0.0   | 0.1   | 0.0   | 0.1   | 0.7   | 0.4   | 0.4   |
| Apba3   | 19.7  | 21.7  | 17.0  | 16.8  | 17.5  | 19.1  | 16.6  | 17.3  | 20.1  | 20.1  | 17.3  | 16.9  |
| Apbb1   | 12.5  | 12.4  | 12.0  | 11.4  | 7.9   | 14.3  | 10.1  | 9.4   | 10.0  | 8.6   | 9.5   | 10.3  |
| Apbb1ip | 2.3   | 3.7   | 4.5   | 3.7   | 4.1   | 2.6   | 3.2   | 2.5   | 1.8   | 2.4   | 1.7   | 2.2   |
| Apbb2   | 14.9  | 17.6  | 17.4  | 19.8  | 19.2  | 19.4  | 22.0  | 16.8  | 18.3  | 19.1  | 20.5  | 19.6  |
| Apbb3   | 2.0   | 2.2   | 2.5   | 2.0   | 2.0   | 1.7   | 2.1   | 2.8   | 2.9   | 2.2   | 2.0   | 2.0   |
| Apc     | 12.4  | 11.6  | 9.5   | 15.3  | 10.4  | 12.7  | 11.0  | 8.5   | 8.8   | 8.7   | 11.2  | 9.9   |
| Apc2    | 1.2   | 1.5   | 1.2   | 1.4   | 1.2   | 1.6   | 1.0   | 0.7   | 0.9   | 0.9   | 0.8   | 0.6   |
| Apcdd1  | 2.6   | 2.8   | 6.4   | 1.7   | 2.4   | 1.2   | 2.4   | 4.1   | 2.3   | 2.3   | 1.7   | 2.7   |
| Apeh    | 14.1  | 16.4  | 13.8  | 12.8  | 15.2  | 15.2  | 16.0  | 16.7  | 16.6  | 17.5  | 16.1  | 16.1  |
| Apex1   | 14.6  | 11.2  | 13.3  | 17.7  | 11.2  | 15.3  | 15.8  | 14.1  | 10.4  | 13.6  | 16.4  | 14.9  |
| Apex2   | 1.6   | 1.4   | 1.8   | 1.5   | 1.8   | 1.7   | 2.1   | 1.9   | 1.4   | 1.9   | 1.7   | 1.4   |
| Aph1a   | 20.0  | 18.2  | 16.5  | 16.8  | 20.2  | 16.4  | 19.7  | 20.7  | 22.0  | 20.5  | 18.2  | 18.2  |
| Aph1b   | 4.9   | 5.9   | 5.5   | 4.4   | 4.9   | 4.9   | 5.6   | 6.3   | 7.9   | 5.4   | 6.7   | 6.1   |
| Aph1c   | 0.4   | 0.8   | 0.6   | 1.1   | 0.8   | 0.4   | 0.5   | 0.5   | 0.7   | 0.6   | 0.4   | 0.5   |
| Api5    | 21.8  | 23.4  | 22.6  | 22.3  | 23.8  | 22.3  | 24.1  | 23.9  | 23.2  | 24.6  | 24.7  | 24.3  |
| Apip    | 18.3  | 18.0  | 19.7  | 18.6  | 16.0  | 16.4  | 16.5  | 19.2  | 17.9  | 18.4  | 19.5  | 20.2  |
| Apitd1  | 0.7   | 1.6   | 1.6   | 1.6   | 1.5   | 0.8   | 2.2   | 1.3   | 1.7   | 0.8   | 0.9   | 0.6   |
| Apif    | 2.5   | 3.0   | 3.5   | 1.6   | 2.0   | 2.1   | 2.7   | 2.6   | 2.0   | 2.2   | 2.4   | 2.4   |
| Apln    | 7.7   | 2.4   | 5.8   | 1.6   | 1.1   | 0.7   | 5.5   | 11.6  | 6.9   | 1.0   | 1.0   | 1.0   |
| Aplnr   | 0.0   | 0.0   | 0.0   | 0.0   | 0.0   | 0.0   | 0.0   | 0.0   | 0.0   | 0.0   | 0.0   | 0.0   |
| Aplp1   | 43.9  | 39.3  | 25.0  | 33.7  | 25.4  | 44.6  | 39.7  | 20.3  | 26.2  | 44.6  | 36.7  | 34.8  |
| Aplp2   | 124.7 | 110.5 | 134.5 | 125.7 | 131.4 | 126.9 | 124.3 | 114.1 | 109.1 | 107.4 | 111.1 | 115.8 |
| Apmap   | 13.7  | 12.7  | 10.7  | 14.8  | 12.1  | 13.5  | 9.3   | 8.7   | 10.7  | 11.2  | 10.3  | 11.0  |
| Apoa1bp | 61.5  | 60.3  | 57.3  | 58.7  | 47.1  | 66.7  | 53.6  | 57.7  | 51.8  | 46.9  | 55.8  | 51.6  |
| Apoa2   | 0.6   | 0.6   | 0.5   | 2.1   | 1.3   | 1.4   | 1.2   | 0.7   | 0.8   | 0.2   | 0.7   | 0.9   |
| Apoa5   | 0.0   | 0.0   | 0.0   | 0.0   | 0.0   | 0.0   | 0.0   | 0.0   | 0.0   | 0.0   | 0.0   | 0.0   |
| Apob    | 0.0   | 0.0   | 0.0   | 0.0   | 0.0   | 0.0   | 0.0   | 0.0   | 0.0   | 0.0   | 0.0   | 0.0   |
| Apobec1 | 4.8   | 3.3   | 4.9   | 8.7   | 11.0  | 2.8   | 4.0   | 3.6   | 2.7   | 2.9   | 2.4   | 4.3   |
| Apobec2 | 0.1   | 0.1   | 0.0   | 0.1   | 0.1   | 0.0   | 0.0   | 0.0   | 0.1   | 0.2   | 0.1   | 0.0   |
| Apobec3 | 2.3   | 4.1   | 4.8   | 2.6   | 4.4   | 2.4   | 4.1   | 4.5   | 3.4   | 2.6   | 2.2   | 3.3   |
| Apobr   | 7.6   | 3.7   | 3.8   | 10.3  | 9.4   | 5.6   | 8.6   | 11.0  | 5.3   | 2.8   | 6.2   | 5.3   |
| Apoc1   | 0.2   | 0.4   | 0.3   | 0.0   | 0.0   | 0.0   | 0.0   | 0.1   | 0.1   | 0.5   | 0.0   | 0.3   |
| Apoc2   | 0.2   | 0.0   | 0.0   | 1.0   | 1.4   | 0.0   | 0.0   | 0.1   | 0.0   | 0.1   | 0.0   | 0.0   |
| Apod    | 3.3   | 3.2   | 6.6   | 4.5   | 4.1   | 2.0   | 2.4   | 3.2   | 1.2   | 1.1   | 1.5   | 1.8   |
| Apoe    | 42.8  | 55.5  | 187.1 | 53.0  | 31.3  | 11.8  | 12.3  | 44.3  | 20.8  | 31.5  | 18.5  | 35.2  |
| Apof    | 0.0   | 0.2   | 0.1   | 0.0   | 0.0   | 0.1   | 0.1   | 0.0   | 0.0   | 0.0   | 0.0   | 0.1   |
| Apoh    | 0.8   | 0.7   | 0.4   | 0.6   | 0.6   | 0.8   | 0.1   | 0.3   | 0.4   | 0.3   | 0.4   | 0.6   |
| Apol10b | 0.4   | 0.3   | 0.7   | 0.9   | 0.7   | 0.4   | 0.4   | 0.3   | 0.3   | 0.3   | 0.4   | 0.1   |
| Apol11b | 0.0   | 0.0   | 0.0   | 0.0   | 0.0   | 0.0   | 0.0   | 0.0   | 0.0   | 0.0   | 0.0   | 0.0   |
| Apol6   | 2.7   | 4.5   | 5.8   | 1.1   | 2.8   | 0.8   | 2.7   | 5.8   | 3.1   | 2.3   | 4.0   | 3.6   |
| Apol7a  | 0.3   | 0.3   | 0.3   | 0.4   | 0.3   | 0.4   | 0.5   | 0.3   | 0.3   | 0.4   | 0.4   | 0.3   |
| Apol7b  | 0.0   | 0.0   | 0.0   | 0.0   | 0.0   | 0.0   | 0.0   | 0.0   | 0.0   | 0.0   | 0.0   | 0.0   |
| Apol7c  | 0.0   | 0.0   | 0.0   | 0.0   | 0.0   | 0.0   | 0.0   | 0.0   | 0.0   | 0.0   | 0.0   | 0.0   |
| Apol7d  | 0.2   | 0.1   | 0.3   | 0.3   | 0.1   | 0.2   | 0.2   | 0.1   | 0.1   | 0.1   | 0.1   | 0.3   |
| Apol7e  | 0.0   | 0.0   | 0.0   | 0.0   | 0.0   | 0.0   | 0.0   | 0.0   | 0.0   | 0.0   | 0.0   | 0.0   |
| Apol8   | 0.1   | 0.0   | 0.0   | 0.2   | 0.0   | 0.1   | 0.0   | 0.0   | 0.0   | 0.1   | 0.0   | 0.1   |
| Apol9a  | 4.5   | 1.8   | 1.9   | 6.4   | 2.8   | 2.7   | 4.3   | 0.8   | 2.1   | 2.2   | 1.7   | 4.0   |
| Apol9b  | 3.7   | 1.5   | 1.5   | 5.5   | 2.4   | 2.9   | 3.0   | 0.7   | 1.5   | 1.9   | 1.7   | 3.7   |
| Apold1  | 0.2   | 0.2   | 0.1   | 0.1   | 0.2   | 0.1   | 0.1   | 0.1   | 0.2   | 0.1   | 0.1   | 0.1   |
| Apom    | 0.3   | 0.1   | 0.0   | 0.1   | 0.0   | 0.1   | 0.1   | 0.1   | 0.0   | 0.1   | 0.0   | 0.0   |
| Apoo    | 9.0   | 14.4  | 14.6  | 14.7  | 15.7  | 15.6  | 11.5  | 10.7  | 13.0  | 17.8  | 15.4  | 17.1  |
| Apool   | 11.2  | 10.0  | 9.7   | 9.2   | 10.2  | 9.3   | 8.0   | 10.5  | 10.0  | 9.8   | 10.9  | 9.1   |
| Apoo-ps | 11.6  | 2.8   | 0.0   | 1.2   | 0.0   | 0.2   | 0.0   | 0.0   | 2.2   | 0.0   | 0.0   | 0.2   |

Online Table 1

|           |       |       |       |       |       |       |       |       |       |       |       |       |
|-----------|-------|-------|-------|-------|-------|-------|-------|-------|-------|-------|-------|-------|
| Apopt1    | 15.0  | 12.6  | 14.9  | 19.0  | 11.0  | 15.2  | 13.2  | 15.9  | 12.8  | 12.6  | 14.6  | 15.5  |
| App       | 312.6 | 263.5 | 284.8 | 259.4 | 292.1 | 259.1 | 272.2 | 284.1 | 253.9 | 289.6 | 266.7 | 270.7 |
| Appbp2    | 14.5  | 16.0  | 13.9  | 13.3  | 14.9  | 12.3  | 14.5  | 15.6  | 16.2  | 16.9  | 15.7  | 14.3  |
| Appl1     | 6.9   | 7.5   | 7.6   | 7.7   | 7.3   | 8.0   | 7.1   | 6.6   | 6.7   | 6.9   | 7.8   | 8.5   |
| Appl2     | 9.5   | 9.0   | 10.8  | 9.7   | 10.2  | 10.9  | 7.5   | 9.0   | 8.0   | 7.9   | 7.6   | 9.6   |
| Aprt      | 46.2  | 39.4  | 36.2  | 48.6  | 48.5  | 46.3  | 38.1  | 39.7  | 38.6  | 55.6  | 44.9  | 39.3  |
| Apix      | 4.3   | 3.5   | 3.5   | 4.4   | 3.2   | 4.0   | 3.6   | 3.1   | 3.2   | 3.1   | 3.5   | 3.6   |
| Aqp1      | 1.3   | 0.1   | 0.2   | 0.7   | 0.5   | 0.3   | 0.8   | 0.4   | 0.3   | 0.9   | 0.8   | 0.5   |
| Aqp11     | 0.2   | 0.2   | 0.1   | 0.5   | 0.3   | 0.4   | 0.2   | 0.2   | 0.1   | 0.3   | 0.3   | 0.1   |
| Aqp2      | 0.3   | 0.1   | 0.4   | 0.0   | 0.0   | 0.0   | 0.1   | 0.5   | 0.4   | 0.4   | 0.2   | 0.5   |
| Aqp3      | 0.1   | 0.0   | 0.0   | 0.0   | 0.1   | 0.0   | 0.0   | 0.0   | 0.0   | 0.0   | 0.0   | 0.0   |
| Aqp4      | 0.0   | 0.0   | 0.0   | 0.0   | 0.0   | 0.0   | 0.0   | 0.0   | 0.0   | 0.0   | 0.0   | 0.0   |
| Aqp5      | 0.3   | 0.0   | 0.0   | 0.2   | 0.1   | 0.0   | 0.1   | 0.4   | 0.3   | 2.6   | 0.8   | 0.9   |
| Aqp7      | 0.0   | 0.0   | 0.0   | 0.0   | 0.0   | 0.1   | 0.0   | 0.0   | 0.0   | 0.0   | 0.0   | 0.0   |
| Aqp9      | 0.2   | 0.1   | 0.0   | 0.2   | 0.7   | 0.0   | 0.3   | 0.0   | 0.0   | 0.0   | 0.0   | 0.1   |
| Aqr       | 12.8  | 11.9  | 13.7  | 13.6  | 12.2  | 12.6  | 12.4  | 13.0  | 10.8  | 11.6  | 12.0  | 11.8  |
| Ar        | 1.3   | 2.1   | 2.2   | 1.6   | 1.6   | 2.1   | 1.5   | 1.7   | 1.2   | 1.1   | 1.7   | 1.1   |
| Araf      | 42.7  | 43.8  | 37.9  | 43.9  | 36.8  | 44.5  | 40.7  | 30.9  | 39.1  | 39.4  | 43.2  | 40.7  |
| Arap1     | 13.3  | 16.9  | 16.7  | 13.5  | 17.3  | 13.1  | 20.8  | 29.9  | 24.4  | 12.5  | 16.6  | 15.1  |
| Arap2     | 6.2   | 5.7   | 5.7   | 4.5   | 5.3   | 4.2   | 4.0   | 2.8   | 3.5   | 7.6   | 5.5   | 6.2   |
| Arap3     | 0.7   | 0.4   | 0.6   | 2.4   | 4.9   | 0.2   | 0.8   | 0.5   | 0.6   | 0.6   | 0.3   | 0.2   |
| Arc       | 0.2   | 0.4   | 0.2   | 0.1   | 0.3   | 0.2   | 0.1   | 0.1   | 0.3   | 2.7   | 0.5   | 0.5   |
| Arcn1     | 78.6  | 75.5  | 73.1  | 73.7  | 68.8  | 70.8  | 76.7  | 77.6  | 72.0  | 74.1  | 82.4  | 82.5  |
| Areg      | 0.1   | 0.0   | 0.0   | 0.0   | 0.4   | 0.0   | 0.0   | 0.1   | 0.0   | 0.1   | 0.0   | 0.2   |
| Arf1      | 142.0 | 144.4 | 129.2 | 157.5 | 148.9 | 141.0 | 149.5 | 155.4 | 148.1 | 151.4 | 165.3 | 152.3 |
| Arf2      | 12.6  | 9.8   | 11.8  | 12.8  | 12.9  | 9.9   | 15.1  | 16.7  | 17.3  | 14.2  | 15.6  | 12.8  |
| Arf3      | 19.8  | 17.4  | 16.6  | 21.5  | 20.1  | 17.8  | 18.6  | 17.4  | 16.8  | 20.5  | 18.7  | 16.9  |
| Arf4      | 109.7 | 113.1 | 102.9 | 124.8 | 123.2 | 119.6 | 121.1 | 118.1 | 124.3 | 130.3 | 139.0 | 128.1 |
| Arf5      | 36.6  | 36.1  | 36.4  | 34.5  | 38.0  | 27.6  | 35.7  | 49.4  | 46.8  | 42.8  | 36.3  | 38.8  |
| Arf6      | 21.5  | 19.9  | 24.7  | 26.2  | 29.7  | 23.5  | 22.4  | 26.6  | 22.3  | 25.3  | 24.1  | 25.2  |
| Arfgap1   | 18.8  | 18.2  | 17.7  | 16.5  | 16.5  | 17.1  | 19.3  | 21.7  | 20.0  | 22.4  | 21.1  | 18.6  |
| Arfgap2   | 10.5  | 13.0  | 10.9  | 9.2   | 10.5  | 10.0  | 11.5  | 12.1  | 11.5  | 11.3  | 9.9   | 11.1  |
| Arfgap3   | 28.2  | 26.5  | 26.9  | 32.1  | 26.3  | 32.8  | 31.7  | 28.9  | 26.3  | 22.0  | 28.4  | 28.8  |
| Arfgef1   | 8.8   | 11.0  | 9.0   | 9.0   | 8.8   | 9.0   | 8.2   | 7.6   | 8.4   | 8.7   | 9.4   | 8.9   |
| Arfgef2   | 11.7  | 13.4  | 12.8  | 11.5  | 11.9  | 11.4  | 13.2  | 11.1  | 12.5  | 11.6  | 11.4  | 13.7  |
| Arfip1    | 42.0  | 38.7  | 36.9  | 52.1  | 38.3  | 47.6  | 40.7  | 34.6  | 37.3  | 40.7  | 47.5  | 45.5  |
| Arfip2    | 14.8  | 12.4  | 10.4  | 17.9  | 12.4  | 17.3  | 13.2  | 13.0  | 11.4  | 12.7  | 14.8  | 11.3  |
| Arfrp1    | 6.4   | 5.6   | 4.0   | 6.3   | 5.4   | 5.9   | 5.0   | 3.9   | 5.4   | 6.0   | 5.8   | 5.5   |
| Arg1      | 0.0   | 0.1   | 0.0   | 0.0   | 0.0   | 0.0   | 0.0   | 0.1   | 0.0   | 0.0   | 0.0   | 0.0   |
| Arg2      | 0.1   | 0.1   | 0.1   | 0.1   | 0.2   | 0.2   | 0.0   | 0.1   | 0.1   | 0.3   | 0.2   | 0.1   |
| Arglu1    | 22.2  | 20.2  | 26.2  | 24.6  | 19.7  | 19.2  | 23.1  | 24.7  | 21.8  | 21.4  | 24.7  | 25.6  |
| Arhgap1   | 28.2  | 25.7  | 24.3  | 31.8  | 27.8  | 27.0  | 33.1  | 29.7  | 31.7  | 37.6  | 35.4  | 31.2  |
| Arhgap10  | 17.1  | 17.2  | 16.3  | 16.8  | 13.8  | 22.0  | 13.8  | 11.9  | 11.0  | 14.5  | 16.9  | 15.9  |
| Arhgap11a | 3.3   | 4.4   | 5.7   | 2.4   | 7.6   | 2.7   | 6.4   | 2.2   | 4.6   | 3.3   | 4.2   | 3.6   |
| Arhgap12  | 8.0   | 7.9   | 8.0   | 7.5   | 7.3   | 7.1   | 7.2   | 6.7   | 7.4   | 7.8   | 8.3   | 8.4   |
| Arhgap15  | 0.1   | 0.1   | 0.1   | 0.2   | 0.7   | 0.0   | 0.2   | 0.0   | 0.1   | 0.1   | 0.1   | 0.0   |
| Arhgap17  | 3.7   | 3.0   | 2.9   | 3.6   | 4.4   | 3.2   | 4.0   | 3.7   | 3.7   | 3.6   | 3.2   | 2.9   |
| Arhgap18  | 1.7   | 1.3   | 1.4   | 3.0   | 3.3   | 0.6   | 1.3   | 0.8   | 0.9   | 2.2   | 1.3   | 1.3   |
| Arhgap19  | 0.4   | 0.4   | 0.6   | 0.7   | 0.8   | 0.1   | 0.6   | 0.4   | 0.6   | 0.4   | 0.6   | 0.5   |
| Arhgap20  | 2.6   | 3.7   | 2.5   | 2.4   | 3.3   | 2.0   | 3.6   | 1.5   | 3.0   | 1.7   | 2.7   | 2.0   |
| Arhgap21  | 13.4  | 15.5  | 15.1  | 13.8  | 10.5  | 12.9  | 11.6  | 12.8  | 11.4  | 9.4   | 13.0  | 11.1  |
| Arhgap22  | 1.0   | 0.3   | 0.3   | 2.9   | 4.5   | 1.2   | 0.7   | 0.1   | 0.3   | 0.6   | 0.3   | 0.4   |
| Arhgap23  | 7.7   | 10.2  | 10.7  | 7.3   | 9.3   | 6.2   | 13.8  | 12.2  | 14.8  | 10.8  | 11.8  | 10.2  |
| Arhgap24  | 21.3  | 24.8  | 25.8  | 30.0  | 20.4  | 17.1  | 21.6  | 18.0  | 20.3  | 16.6  | 19.2  | 21.3  |
| Arhgap25  | 0.3   | 0.0   | 0.0   | 3.3   | 3.5   | 0.0   | 0.5   | 0.2   | 0.1   | 0.3   | 0.0   | 0.2   |
| Arhgap26  | 0.4   | 0.4   | 0.3   | 0.5   | 0.5   | 0.5   | 0.3   | 0.3   | 0.2   | 0.3   | 0.2   | 0.2   |
| Arhgap27  | 2.2   | 2.2   | 2.2   | 3.4   | 4.6   | 3.2   | 2.5   | 1.5   | 1.8   | 1.7   | 1.7   | 1.5   |

Online Table 1

|           |       |       |       |       |       |       |       |       |       |       |       |       |
|-----------|-------|-------|-------|-------|-------|-------|-------|-------|-------|-------|-------|-------|
| Arhgap28  | 1.6   | 1.3   | 1.2   | 2.1   | 1.6   | 2.1   | 1.6   | 1.4   | 0.9   | 1.4   | 1.3   | 0.7   |
| Arhgap29  | 23.2  | 21.7  | 24.5  | 17.6  | 16.8  | 16.9  | 22.3  | 28.0  | 26.1  | 38.1  | 36.8  | 31.4  |
| Arhgap30  | 0.6   | 0.0   | 0.1   | 5.8   | 9.3   | 0.0   | 1.0   | 0.1   | 0.1   | 0.6   | 0.1   | 0.7   |
| Arhgap31  | 7.0   | 8.2   | 8.3   | 8.2   | 7.8   | 9.7   | 9.8   | 8.7   | 8.1   | 5.6   | 7.2   | 7.3   |
| Arhgap32  | 1.7   | 2.5   | 2.6   | 1.8   | 2.1   | 1.8   | 2.7   | 2.1   | 2.4   | 2.5   | 2.2   | 1.8   |
| Arhgap33  | 0.1   | 0.1   | 0.0   | 0.1   | 0.1   | 0.1   | 0.1   | 0.1   | 0.1   | 0.1   | 0.0   | 0.0   |
| Arhgap39  | 1.5   | 1.5   | 1.4   | 1.8   | 1.7   | 1.7   | 1.5   | 1.3   | 1.4   | 1.6   | 1.3   | 1.4   |
| Arhgap4   | 0.3   | 0.1   | 0.1   | 2.0   | 4.3   | 0.2   | 0.7   | 0.1   | 0.3   | 0.2   | 0.2   | 0.4   |
| Arhgap42  | 2.0   | 4.0   | 4.7   | 2.1   | 2.8   | 1.9   | 2.6   | 2.9   | 3.0   | 2.5   | 3.1   | 3.2   |
| Arhgap44  | 5.4   | 5.1   | 4.1   | 5.4   | 3.2   | 6.4   | 3.9   | 3.4   | 3.5   | 5.4   | 4.7   | 3.6   |
| Arhgap5   | 23.5  | 28.0  | 26.5  | 26.2  | 25.4  | 22.5  | 24.8  | 30.4  | 31.1  | 26.0  | 30.5  | 32.2  |
| Arhgap6   | 3.5   | 5.8   | 5.7   | 3.1   | 3.0   | 3.6   | 3.3   | 3.0   | 3.7   | 2.6   | 3.2   | 4.7   |
| Arhgap8   | 0.2   | 0.1   | 0.0   | 0.0   | 0.1   | 0.0   | 0.1   | 0.1   | 0.1   | 0.1   | 0.0   | 0.1   |
| Arhgap9   | 0.5   | 0.1   | 0.1   | 2.9   | 4.9   | 0.1   | 0.6   | 0.1   | 0.2   | 0.2   | 0.4   | 0.3   |
| Arhgdia   | 85.7  | 79.7  | 70.3  | 118.6 | 98.3  | 95.2  | 104.9 | 102.0 | 87.5  | 79.8  | 91.5  | 79.0  |
| Arhgdib   | 37.6  | 18.6  | 17.7  | 75.9  | 86.7  | 41.5  | 28.9  | 15.4  | 13.5  | 42.8  | 29.9  | 24.0  |
| Arhgdig   | 3.3   | 2.4   | 1.2   | 5.6   | 2.4   | 4.5   | 3.4   | 1.6   | 2.1   | 3.4   | 2.4   | 2.5   |
| Arhgef1   | 11.2  | 14.1  | 13.3  | 13.4  | 15.2  | 10.9  | 13.0  | 11.8  | 12.0  | 11.8  | 10.6  | 10.4  |
| Arhgef10  | 14.2  | 12.3  | 12.1  | 14.3  | 12.4  | 13.5  | 14.5  | 14.9  | 13.7  | 11.1  | 13.7  | 12.5  |
| Arhgef10l | 5.4   | 5.6   | 5.6   | 4.9   | 5.1   | 6.3   | 5.4   | 5.6   | 6.7   | 5.5   | 5.0   | 6.1   |
| Arhgef11  | 8.9   | 8.7   | 8.2   | 8.6   | 8.2   | 8.8   | 8.6   | 7.2   | 8.0   | 6.6   | 7.1   | 6.8   |
| Arhgef12  | 22.5  | 24.6  | 23.5  | 23.6  | 19.8  | 23.2  | 21.8  | 21.7  | 22.8  | 21.3  | 21.6  | 23.0  |
| Arhgef15  | 0.1   | 0.0   | 0.0   | 0.0   | 0.0   | 0.0   | 0.1   | 0.0   | 0.0   | 0.0   | 0.1   | 0.0   |
| Arhgef16  | 0.1   | 0.0   | 0.1   | 0.1   | 0.1   | 0.0   | 0.0   | 0.0   | 0.1   | 0.0   | 0.0   | 0.0   |
| Arhgef17  | 11.9  | 13.0  | 12.8  | 11.2  | 10.8  | 13.1  | 13.8  | 10.6  | 12.8  | 12.8  | 12.2  | 11.8  |
| Arhgef18  | 13.8  | 16.0  | 13.0  | 10.9  | 10.7  | 13.7  | 12.3  | 10.5  | 13.2  | 11.5  | 12.5  | 11.8  |
| Arhgef19  | 1.7   | 2.0   | 2.0   | 1.2   | 2.3   | 1.4   | 2.1   | 3.0   | 2.4   | 1.9   | 1.8   | 2.1   |
| Arhgef2   | 34.0  | 25.0  | 22.6  | 37.3  | 27.8  | 35.9  | 29.0  | 38.2  | 32.5  | 23.8  | 31.0  | 23.5  |
| Arhgef25  | 31.7  | 35.6  | 34.3  | 26.3  | 26.5  | 29.2  | 32.3  | 36.0  | 39.3  | 31.7  | 33.1  | 30.2  |
| Arhgef26  | 0.6   | 1.2   | 1.2   | 0.6   | 1.2   | 0.3   | 1.7   | 1.7   | 1.6   | 1.5   | 1.3   | 1.4   |
| Arhgef28  | 5.7   | 5.6   | 6.1   | 5.2   | 4.8   | 4.9   | 3.6   | 4.8   | 2.7   | 4.2   | 4.4   | 3.5   |
| Arhgef3   | 5.9   | 6.5   | 7.5   | 5.7   | 6.7   | 4.5   | 4.0   | 5.1   | 3.1   | 3.9   | 4.2   | 5.1   |
| Arhgef33  | 0.0   | 0.0   | 0.0   | 0.0   | 0.0   | 0.0   | 0.0   | 0.0   | 0.0   | 0.1   | 0.0   | 0.0   |
| Arhgef37  | 0.6   | 0.3   | 0.2   | 0.8   | 0.1   | 1.1   | 0.1   | 0.1   | 0.1   | 0.2   | 0.2   | 0.1   |
| Arhgef39  | 0.3   | 0.9   | 0.7   | 0.4   | 0.7   | 0.3   | 1.6   | 0.5   | 1.0   | 0.5   | 0.8   | 0.4   |
| Arhgef4   | 1.5   | 1.5   | 1.3   | 1.5   | 1.3   | 1.9   | 1.3   | 0.8   | 0.7   | 0.9   | 1.1   | 1.0   |
| Arhgef40  | 13.0  | 17.7  | 21.4  | 14.1  | 18.2  | 15.4  | 22.7  | 23.8  | 22.6  | 18.2  | 16.3  | 18.2  |
| Arhgef5   | 17.7  | 12.7  | 11.3  | 14.3  | 9.4   | 14.7  | 11.2  | 8.5   | 8.6   | 16.3  | 15.0  | 14.3  |
| Arhgef6   | 9.9   | 9.0   | 10.2  | 12.6  | 13.1  | 10.8  | 7.1   | 6.8   | 5.4   | 4.3   | 5.2   | 6.3   |
| Arhgef7   | 6.5   | 7.6   | 7.9   | 7.9   | 11.1  | 6.2   | 8.3   | 8.6   | 8.4   | 8.2   | 7.9   | 8.5   |
| Arhgef9   | 1.3   | 1.4   | 2.0   | 1.2   | 0.9   | 1.6   | 0.9   | 1.2   | 0.9   | 0.9   | 1.2   | 1.4   |
| Arid1a    | 1.5   | 1.9   | 2.1   | 1.6   | 1.9   | 1.5   | 2.3   | 1.9   | 1.9   | 1.8   | 1.7   | 1.6   |
| Arid1b    | 4.1   | 5.2   | 5.1   | 4.8   | 4.3   | 4.5   | 5.3   | 4.9   | 4.7   | 4.4   | 4.6   | 4.6   |
| Arid2     | 3.2   | 4.1   | 3.8   | 3.2   | 3.5   | 3.3   | 3.7   | 4.1   | 3.9   | 4.0   | 4.2   | 3.6   |
| Arid3a    | 0.6   | 0.7   | 0.5   | 0.7   | 1.1   | 0.5   | 1.2   | 0.6   | 1.0   | 1.3   | 0.8   | 0.9   |
| Arid3b    | 0.2   | 0.2   | 0.3   | 0.3   | 0.5   | 0.2   | 0.3   | 0.1   | 0.2   | 0.2   | 0.2   | 0.2   |
| Arid4a    | 9.0   | 8.5   | 9.8   | 12.8  | 9.8   | 9.6   | 10.5  | 6.7   | 7.1   | 8.3   | 11.3  | 11.1  |
| Arid4b    | 8.8   | 9.7   | 11.3  | 9.8   | 8.3   | 8.6   | 8.2   | 9.4   | 8.3   | 10.9  | 10.6  | 11.5  |
| Arid5a    | 1.8   | 2.3   | 2.9   | 1.1   | 2.3   | 0.8   | 2.0   | 1.9   | 1.6   | 2.1   | 1.7   | 2.0   |
| Arid5b    | 22.5  | 30.2  | 34.6  | 20.3  | 18.6  | 21.6  | 20.2  | 24.9  | 19.2  | 25.1  | 24.1  | 23.5  |
| Arih1     | 25.0  | 25.3  | 22.2  | 25.4  | 24.1  | 27.7  | 23.2  | 20.3  | 22.5  | 28.5  | 29.6  | 26.3  |
| Arih2     | 12.7  | 12.3  | 11.6  | 13.0  | 11.4  | 11.4  | 12.7  | 12.3  | 12.3  | 12.3  | 12.6  | 12.0  |
| Arl1      | 171.9 | 168.5 | 173.8 | 173.9 | 162.8 | 173.1 | 194.4 | 175.0 | 168.0 | 175.4 | 208.5 | 206.9 |
| Arl10     | 5.4   | 6.1   | 4.5   | 5.5   | 5.6   | 5.0   | 6.3   | 6.2   | 7.1   | 6.0   | 4.5   | 4.9   |
| Arl11     | 0.5   | 0.0   | 0.1   | 2.8   | 6.0   | 0.1   | 0.8   | 0.1   | 0.1   | 0.3   | 0.1   | 0.2   |
| Arl13b    | 6.1   | 6.8   | 8.7   | 6.7   | 6.2   | 6.6   | 6.9   | 6.4   | 6.3   | 6.6   | 7.3   | 6.9   |
| Arl14ep   | 9.6   | 7.9   | 8.0   | 9.7   | 8.5   | 9.4   | 9.1   | 10.1  | 10.1  | 9.3   | 11.5  | 10.3  |

Online Table 1

|          |       |       |       |       |       |       |       |       |       |       |       |       |
|----------|-------|-------|-------|-------|-------|-------|-------|-------|-------|-------|-------|-------|
| Arl14ep1 | 0.1   | 0.0   | 0.1   | 0.0   | 0.0   | 0.0   | 0.0   | 0.0   | 0.1   | 0.1   | 0.1   | 0.1   |
| Arl15    | 5.4   | 7.0   | 7.4   | 6.7   | 7.1   | 6.2   | 5.8   | 6.5   | 5.4   | 6.2   | 6.0   | 6.5   |
| Arl16    | 9.2   | 7.9   | 7.8   | 11.2  | 8.1   | 8.9   | 9.4   | 7.5   | 7.4   | 8.4   | 9.0   | 7.8   |
| Arl2     | 31.1  | 24.2  | 23.8  | 35.7  | 22.9  | 43.4  | 28.1  | 30.2  | 28.3  | 26.4  | 25.8  | 25.7  |
| Arl2bp   | 45.3  | 40.1  | 37.4  | 48.9  | 34.7  | 43.1  | 41.8  | 38.8  | 39.3  | 30.3  | 40.4  | 33.3  |
| Arl3     | 42.6  | 38.7  | 43.2  | 50.6  | 37.4  | 49.0  | 41.1  | 42.1  | 36.4  | 41.5  | 45.3  | 47.0  |
| Arl4a    | 1.3   | 1.2   | 1.4   | 1.1   | 1.4   | 1.3   | 1.6   | 1.6   | 1.7   | 2.0   | 1.8   | 1.8   |
| Arl4c    | 2.9   | 1.2   | 1.3   | 4.9   | 6.0   | 3.1   | 2.2   | 1.3   | 2.1   | 4.7   | 2.8   | 2.0   |
| Arl4d    | 0.7   | 0.7   | 0.6   | 0.2   | 0.6   | 0.8   | 0.8   | 2.0   | 1.1   | 5.5   | 4.1   | 1.6   |
| Arl5a    | 42.6  | 42.1  | 38.0  | 48.9  | 38.5  | 44.6  | 43.5  | 30.8  | 48.1  | 41.7  | 51.8  | 49.2  |
| Arl5b    | 2.5   | 2.7   | 2.1   | 2.5   | 2.4   | 1.9   | 1.9   | 2.1   | 2.4   | 4.0   | 3.2   | 2.8   |
| Arl5c    | 0.1   | 0.2   | 0.1   | 0.9   | 1.1   | 0.3   | 0.3   | 0.2   | 0.2   | 0.2   | 0.1   | 0.2   |
| Arl6     | 8.8   | 8.2   | 8.4   | 9.1   | 7.4   | 10.4  | 7.2   | 7.6   | 7.6   | 8.1   | 9.3   | 8.8   |
| Arl6ip1  | 64.6  | 63.1  | 56.4  | 63.9  | 75.7  | 66.8  | 66.6  | 46.3  | 70.0  | 72.5  | 67.2  | 62.4  |
| Arl6ip4  | 22.7  | 18.3  | 18.3  | 21.0  | 18.7  | 20.2  | 21.9  | 22.8  | 18.1  | 22.4  | 20.3  | 22.5  |
| Arl6ip5  | 73.7  | 56.9  | 60.7  | 77.2  | 69.2  | 65.8  | 69.5  | 61.1  | 61.6  | 69.3  | 74.2  | 76.7  |
| Arl6ip6  | 2.7   | 4.0   | 4.9   | 1.8   | 3.7   | 2.9   | 3.3   | 4.1   | 4.4   | 4.1   | 3.9   | 3.7   |
| Arl8a    | 25.1  | 23.0  | 21.9  | 29.3  | 23.9  | 29.2  | 27.2  | 20.7  | 19.5  | 23.1  | 24.1  | 22.3  |
| Arl8b    | 33.7  | 32.8  | 32.7  | 36.1  | 35.0  | 37.2  | 29.6  | 29.4  | 28.9  | 33.2  | 33.6  | 36.7  |
| Armc1    | 12.4  | 11.3  | 11.7  | 10.8  | 14.0  | 12.6  | 12.0  | 11.4  | 13.9  | 13.7  | 12.9  | 13.2  |
| Armc10   | 12.8  | 11.3  | 11.6  | 13.0  | 10.6  | 12.8  | 9.4   | 12.7  | 10.6  | 12.5  | 11.8  | 11.4  |
| Armc2    | 0.1   | 0.1   | 0.1   | 0.0   | 0.1   | 0.0   | 0.0   | 0.0   | 0.0   | 0.1   | 0.0   | 0.1   |
| Armc5    | 3.4   | 4.1   | 3.2   | 3.4   | 4.1   | 3.8   | 4.3   | 4.6   | 4.9   | 4.2   | 3.3   | 3.8   |
| Armc6    | 3.3   | 2.4   | 1.5   | 2.8   | 3.2   | 2.8   | 3.5   | 3.2   | 3.3   | 3.9   | 3.1   | 2.8   |
| Armc7    | 2.3   | 1.9   | 1.6   | 3.1   | 2.9   | 1.9   | 2.0   | 1.8   | 1.7   | 1.6   | 1.7   | 1.7   |
| Armc8    | 5.8   | 5.7   | 5.1   | 6.4   | 5.1   | 5.7   | 5.4   | 5.8   | 5.6   | 5.1   | 5.7   | 5.4   |
| Armc9    | 4.8   | 4.1   | 4.2   | 4.2   | 3.4   | 4.7   | 3.5   | 3.9   | 3.0   | 4.3   | 3.9   | 3.8   |
| Armcx1   | 16.4  | 13.4  | 15.7  | 20.3  | 13.0  | 20.3  | 13.4  | 13.5  | 14.0  | 13.7  | 15.6  | 15.7  |
| Armcx2   | 31.2  | 32.2  | 31.2  | 32.4  | 24.4  | 38.4  | 26.2  | 28.8  | 32.0  | 41.9  | 37.7  | 33.8  |
| Armcx3   | 31.9  | 29.5  | 30.0  | 33.7  | 27.9  | 35.6  | 28.6  | 30.0  | 34.1  | 41.4  | 41.6  | 39.4  |
| Armcx4   | 1.1   | 1.2   | 1.4   | 1.3   | 1.5   | 1.5   | 1.8   | 1.4   | 1.4   | 1.0   | 1.2   | 1.4   |
| Armcx5   | 3.8   | 3.0   | 3.5   | 3.7   | 3.4   | 3.8   | 3.7   | 3.2   | 3.5   | 3.4   | 4.0   | 4.0   |
| Armcx6   | 5.1   | 5.3   | 5.5   | 5.4   | 3.8   | 6.9   | 4.6   | 4.0   | 5.8   | 7.1   | 6.7   | 6.2   |
| Arnt     | 8.3   | 11.3  | 14.6  | 7.3   | 10.2  | 7.8   | 10.8  | 13.9  | 10.7  | 10.6  | 10.2  | 12.6  |
| Arnt2    | 7.0   | 5.8   | 3.7   | 5.4   | 3.9   | 5.7   | 3.6   | 3.8   | 2.7   | 3.3   | 4.3   | 3.1   |
| Arntl    | 4.3   | 6.7   | 5.3   | 4.6   | 5.3   | 5.3   | 4.7   | 5.9   | 5.4   | 4.6   | 5.4   | 5.1   |
| Arntl2   | 5.0   | 4.3   | 3.7   | 3.1   | 4.0   | 3.9   | 3.5   | 3.0   | 2.8   | 4.2   | 4.0   | 4.0   |
| Arpc1a   | 43.7  | 46.1  | 37.0  | 41.3  | 37.6  | 40.1  | 36.7  | 38.8  | 38.7  | 44.3  | 42.2  | 41.0  |
| Arpc1b   | 192.7 | 168.4 | 157.3 | 247.5 | 271.2 | 204.8 | 215.6 | 204.4 | 197.4 | 196.3 | 201.3 | 174.3 |
| Arpc2    | 139.7 | 120.9 | 123.7 | 169.3 | 138.6 | 144.3 | 131.6 | 124.6 | 114.4 | 124.2 | 142.6 | 147.6 |
| Arpc3    | 177.0 | 134.7 | 141.5 | 205.3 | 185.6 | 164.5 | 159.5 | 149.7 | 134.4 | 158.2 | 157.0 | 182.3 |
| Arpc4    | 38.6  | 34.8  | 27.8  | 40.6  | 53.4  | 33.1  | 42.8  | 35.9  | 41.9  | 42.9  | 39.8  | 37.0  |
| Arpc5    | 49.0  | 46.4  | 46.6  | 57.3  | 74.1  | 42.1  | 52.9  | 51.1  | 52.2  | 53.4  | 60.9  | 57.4  |
| Arpc5l   | 43.6  | 35.0  | 32.9  | 38.7  | 35.0  | 38.7  | 31.5  | 32.4  | 32.2  | 37.1  | 38.0  | 36.4  |
| Arpp19   | 13.6  | 13.6  | 13.1  | 15.5  | 13.9  | 15.5  | 12.4  | 13.7  | 11.9  | 14.0  | 16.6  | 15.0  |
| Arpp21   | 0.0   | 0.0   | 0.0   | 0.0   | 0.0   | 0.0   | 0.0   | 0.0   | 0.0   | 0.0   | 0.0   | 0.0   |
| Arrb1    | 3.3   | 3.1   | 3.0   | 6.0   | 7.5   | 3.1   | 3.4   | 2.6   | 2.8   | 2.4   | 2.8   | 2.6   |
| Arrb2    | 3.4   | 2.2   | 2.3   | 12.9  | 21.7  | 2.3   | 4.5   | 3.1   | 2.3   | 2.7   | 1.5   | 2.4   |
| Arrdc1   | 3.5   | 4.0   | 3.7   | 2.8   | 5.2   | 4.0   | 4.5   | 4.2   | 4.2   | 4.0   | 3.5   | 2.9   |
| Arrdc2   | 2.2   | 2.8   | 2.4   | 1.8   | 2.2   | 1.9   | 2.7   | 3.2   | 2.9   | 2.0   | 2.6   | 2.4   |
| Arrdc3   | 4.0   | 4.7   | 5.4   | 3.3   | 3.0   | 6.9   | 2.1   | 3.0   | 2.6   | 4.1   | 3.4   | 3.5   |
| Arrdc4   | 6.8   | 5.9   | 5.6   | 9.7   | 9.1   | 5.7   | 9.0   | 7.5   | 8.5   | 7.4   | 9.6   | 8.9   |
| Arsa     | 20.2  | 17.8  | 17.0  | 18.8  | 17.5  | 21.9  | 18.2  | 20.4  | 20.3  | 15.2  | 15.5  | 15.9  |
| Arsb     | 4.8   | 5.2   | 5.7   | 4.5   | 4.7   | 6.5   | 4.2   | 4.1   | 3.9   | 3.9   | 4.0   | 4.6   |
| Arsg     | 2.2   | 2.4   | 2.5   | 1.5   | 2.1   | 2.3   | 2.5   | 2.8   | 2.3   | 2.1   | 2.0   | 2.2   |
| Arsi     | 0.5   | 1.4   | 1.4   | 0.0   | 0.4   | 0.0   | 1.1   | 2.1   | 2.2   | 1.6   | 1.3   | 2.1   |
| Arsj     | 1.5   | 2.1   | 2.6   | 1.2   | 2.2   | 1.4   | 2.7   | 2.4   | 2.3   | 1.6   | 1.8   | 1.9   |

Online Table 1

|         |       |       |       |       |       |       |       |       |       |       |       |       |
|---------|-------|-------|-------|-------|-------|-------|-------|-------|-------|-------|-------|-------|
| Arsk    | 6.1   | 5.9   | 6.5   | 9.2   | 6.6   | 8.7   | 5.8   | 6.5   | 5.4   | 5.3   | 6.7   | 6.5   |
| Art3    | 1.5   | 0.8   | 1.3   | 1.0   | 0.9   | 0.7   | 0.5   | 0.5   | 0.2   | 0.2   | 0.1   | 0.5   |
| Art4    | 0.8   | 1.1   | 2.5   | 0.4   | 1.5   | 0.3   | 0.7   | 1.0   | 0.8   | 0.7   | 0.7   | 1.3   |
| Art5    | 0.1   | 0.0   | 0.0   | 0.0   | 0.0   | 0.0   | 0.0   | 0.0   | 0.0   | 0.0   | 0.0   | 0.0   |
| Artn    | 0.4   | 0.2   | 0.5   | 0.3   | 0.3   | 0.1   | 0.3   | 0.6   | 0.3   | 0.2   | 0.1   | 0.2   |
| Arv1    | 0.8   | 1.0   | 0.8   | 1.2   | 1.2   | 1.1   | 0.8   | 1.0   | 0.9   | 0.8   | 0.8   | 0.8   |
| Arvcf   | 9.2   | 16.4  | 17.7  | 7.4   | 10.3  | 9.0   | 13.9  | 18.0  | 21.1  | 9.9   | 12.0  | 13.1  |
| Arx     | 0.1   | 0.1   | 0.0   | 0.1   | 0.0   | 0.0   | 0.1   | 0.0   | 0.0   | 0.0   | 0.0   | 0.0   |
| Arxes1  | 1.3   | 1.7   | 1.0   | 2.4   | 1.8   | 1.5   | 2.9   | 1.3   | 3.4   | 1.7   | 1.9   | 1.9   |
| Arxes2  | 5.1   | 6.9   | 8.8   | 11.7  | 9.0   | 8.7   | 13.2  | 7.2   | 15.3  | 10.5  | 10.7  | 16.2  |
| As3mt   | 1.9   | 2.1   | 1.8   | 1.8   | 1.7   | 1.7   | 2.6   | 2.3   | 2.1   | 2.3   | 2.0   | 2.0   |
| Asah1   | 246.6 | 193.7 | 169.9 | 247.7 | 191.3 | 244.0 | 196.3 | 231.3 | 222.9 | 166.9 | 252.7 | 243.4 |
| Asah2   | 11.8  | 11.5  | 12.6  | 14.1  | 11.3  | 15.7  | 10.1  | 8.9   | 9.0   | 11.1  | 11.4  | 12.9  |
| Asap1   | 16.2  | 22.3  | 19.3  | 18.9  | 16.0  | 20.5  | 23.6  | 15.6  | 19.3  | 15.3  | 19.2  | 20.5  |
| Asap2   | 2.3   | 2.0   | 1.9   | 1.9   | 1.7   | 1.9   | 1.9   | 1.6   | 1.7   | 2.3   | 2.2   | 1.8   |
| Asap3   | 5.4   | 7.4   | 9.1   | 5.6   | 5.9   | 6.3   | 6.8   | 8.7   | 7.3   | 4.4   | 5.0   | 6.3   |
| Asb1    | 6.5   | 6.5   | 5.7   | 5.7   | 5.8   | 5.9   | 5.3   | 4.4   | 5.8   | 4.9   | 5.3   | 5.2   |
| Asb13   | 1.4   | 2.5   | 2.0   | 1.4   | 1.5   | 1.9   | 1.3   | 1.4   | 1.6   | 1.5   | 1.5   | 1.4   |
| Asb14   | 0.1   | 0.1   | 0.0   | 0.0   | 0.0   | 0.0   | 0.1   | 0.0   | 0.0   | 0.0   | 0.0   | 0.0   |
| Asb15   | 0.0   | 0.0   | 0.0   | 0.0   | 0.0   | 0.0   | 0.0   | 0.0   | 0.0   | 0.0   | 0.0   | 0.0   |
| Asb16   | 0.0   | 0.0   | 0.0   | 0.0   | 0.0   | 0.2   | 0.0   | 0.0   | 0.0   | 0.0   | 0.0   | 0.0   |
| Asb2    | 0.3   | 0.1   | 0.2   | 1.7   | 4.7   | 0.3   | 1.2   | 0.1   | 0.6   | 0.9   | 0.7   | 0.4   |
| Asb3    | 7.0   | 7.8   | 7.3   | 8.7   | 6.5   | 8.2   | 7.5   | 6.7   | 6.9   | 7.2   | 8.1   | 7.2   |
| Asb4    | 0.3   | 0.4   | 0.5   | 0.3   | 0.5   | 0.4   | 0.4   | 0.6   | 0.3   | 0.2   | 0.2   | 0.3   |
| Asb5    | 25.5  | 15.5  | 6.4   | 25.4  | 17.5  | 13.6  | 23.7  | 4.7   | 11.1  | 10.0  | 12.1  | 11.2  |
| Asb6    | 10.9  | 9.9   | 9.7   | 12.8  | 11.0  | 10.7  | 12.1  | 10.7  | 12.7  | 10.7  | 11.1  | 9.8   |
| Asb7    | 3.9   | 4.0   | 4.3   | 4.5   | 3.5   | 4.1   | 3.7   | 4.0   | 3.8   | 4.1   | 4.1   | 4.1   |
| Asb8    | 8.2   | 8.3   | 7.1   | 7.5   | 8.0   | 8.9   | 7.6   | 7.6   | 7.6   | 8.1   | 7.2   | 7.7   |
| Ascc1   | 13.9  | 13.7  | 11.1  | 13.0  | 10.8  | 14.8  | 12.2  | 13.7  | 12.3  | 13.2  | 13.9  | 13.2  |
| Ascc2   | 13.5  | 12.2  | 11.1  | 13.6  | 12.7  | 14.7  | 13.4  | 14.5  | 12.4  | 11.6  | 13.3  | 11.4  |
| Ascc3   | 10.0  | 9.1   | 8.0   | 10.2  | 9.6   | 9.2   | 9.2   | 8.7   | 8.4   | 9.8   | 11.4  | 10.8  |
| Ascl2   | 0.2   | 0.2   | 0.1   | 0.0   | 0.2   | 0.1   | 0.1   | 0.0   | 0.2   | 0.1   | 0.1   | 0.1   |
| Ascl3   | 0.4   | 0.1   | 0.2   | 0.0   | 0.1   | 0.1   | 0.1   | 0.1   | 0.0   | 0.1   | 0.0   | 0.1   |
| Asf1a   | 5.0   | 4.8   | 4.9   | 4.1   | 4.0   | 4.4   | 4.0   | 4.8   | 4.5   | 5.2   | 4.4   | 5.2   |
| Asf1b   | 1.7   | 3.6   | 4.4   | 1.4   | 3.7   | 0.7   | 4.7   | 2.6   | 3.6   | 1.5   | 3.6   | 2.0   |
| Asgr1   | 0.0   | 0.0   | 0.0   | 0.0   | 0.1   | 0.0   | 0.0   | 0.1   | 0.1   | 0.0   | 0.0   | 0.0   |
| Ash1l   | 7.9   | 8.6   | 8.9   | 8.1   | 7.8   | 7.8   | 8.5   | 8.5   | 7.2   | 7.3   | 8.3   | 7.9   |
| Ash2l   | 17.4  | 18.5  | 17.2  | 17.7  | 15.8  | 16.5  | 16.8  | 18.3  | 17.1  | 17.8  | 18.2  | 18.5  |
| Asic1   | 0.5   | 0.4   | 0.4   | 0.5   | 0.5   | 0.5   | 0.6   | 0.4   | 0.6   | 0.9   | 0.7   | 0.9   |
| Asic3   | 0.7   | 1.0   | 0.8   | 0.2   | 1.0   | 0.4   | 0.4   | 0.3   | 0.4   | 1.7   | 1.8   | 1.6   |
| Asic5   | 0.0   | 0.0   | 0.0   | 0.0   | 0.0   | 0.0   | 0.0   | 0.0   | 0.0   | 0.0   | 0.1   | 0.1   |
| Asl     | 14.1  | 13.7  | 11.6  | 15.4  | 14.0  | 14.4  | 13.6  | 13.3  | 14.1  | 11.5  | 12.6  | 11.4  |
| Asna1   | 29.5  | 27.3  | 25.6  | 35.2  | 29.5  | 31.5  | 25.4  | 30.4  | 24.4  | 29.8  | 31.2  | 28.6  |
| Asns    | 69.9  | 45.9  | 34.0  | 69.0  | 38.4  | 58.9  | 53.6  | 68.6  | 65.6  | 41.1  | 65.0  | 40.6  |
| Asnsd1  | 35.7  | 28.4  | 26.9  | 28.2  | 28.0  | 34.1  | 25.4  | 27.3  | 27.7  | 33.1  | 34.4  | 32.2  |
| Aspa    | 0.2   | 0.2   | 0.5   | 0.0   | 0.0   | 0.3   | 0.2   | 0.3   | 0.1   | 0.2   | 0.0   | 0.1   |
| Aspg    | 0.1   | 0.4   | 0.6   | 0.2   | 0.4   | 0.2   | 0.2   | 0.3   | 0.3   | 0.1   | 0.2   | 0.1   |
| Asph    | 37.5  | 33.0  | 37.1  | 43.5  | 35.3  | 44.2  | 36.9  | 33.4  | 29.9  | 31.7  | 38.5  | 36.1  |
| Asphd2  | 1.2   | 1.8   | 1.3   | 0.9   | 0.8   | 2.5   | 1.0   | 0.9   | 1.0   | 1.5   | 1.1   | 0.4   |
| Aspm    | 0.8   | 1.3   | 2.2   | 0.7   | 2.3   | 0.2   | 2.8   | 1.1   | 2.6   | 1.2   | 2.2   | 1.3   |
| Aspn    | 1.3   | 1.7   | 6.3   | 3.1   | 2.6   | 1.3   | 2.2   | 7.0   | 4.2   | 5.9   | 16.4  | 5.6   |
| Asprv1  | 0.0   | 0.1   | 0.1   | 0.0   | 0.0   | 0.1   | 0.0   | 0.0   | 0.0   | 0.1   | 0.0   | 0.0   |
| Aspscr1 | 13.6  | 15.3  | 12.7  | 15.2  | 14.1  | 13.6  | 13.5  | 14.3  | 13.8  | 12.7  | 13.4  | 12.0  |
| Asrgl1  | 4.9   | 5.7   | 7.0   | 4.9   | 4.1   | 5.7   | 6.6   | 5.6   | 5.0   | 4.9   | 5.5   | 5.5   |
| Ass1    | 48.2  | 31.6  | 24.6  | 69.3  | 58.0  | 73.7  | 30.0  | 19.1  | 28.0  | 49.3  | 30.3  | 28.5  |
| Aste1   | 1.9   | 1.9   | 1.6   | 1.7   | 2.2   | 1.6   | 1.9   | 1.5   | 1.7   | 1.8   | 1.8   | 1.5   |
| Astn1   | 0.0   | 0.0   | 0.0   | 0.0   | 0.0   | 0.0   | 0.0   | 0.0   | 0.0   | 0.0   | 0.0   | 0.0   |

Online Table 1

|         |       |       |       |       |       |       |       |       |       |       |       |       |
|---------|-------|-------|-------|-------|-------|-------|-------|-------|-------|-------|-------|-------|
| Astn2   | 0.1   | 0.3   | 0.1   | 0.1   | 0.3   | 0.1   | 0.2   | 0.2   | 0.2   | 0.0   | 0.1   | 0.0   |
| Asun    | 8.6   | 8.8   | 8.7   | 8.9   | 8.5   | 7.7   | 8.6   | 8.3   | 7.7   | 8.7   | 9.2   | 9.0   |
| Asxl1   | 3.4   | 4.6   | 4.6   | 3.2   | 3.9   | 3.6   | 4.0   | 4.4   | 4.5   | 3.8   | 4.4   | 4.1   |
| Asxl2   | 3.0   | 3.2   | 3.1   | 3.6   | 3.1   | 3.0   | 2.9   | 3.2   | 2.7   | 2.7   | 2.9   | 3.1   |
| Asxl3   | 0.0   | 0.0   | 0.0   | 0.0   | 0.0   | 0.0   | 0.0   | 0.0   | 0.0   | 0.0   | 0.0   | 0.0   |
| Asz1    | 0.1   | 0.0   | 0.0   | 0.1   | 0.1   | 0.1   | 0.0   | 0.0   | 0.0   | 0.0   | 0.0   | 0.0   |
| Atad1   | 26.8  | 26.9  | 26.7  | 27.3  | 26.5  | 30.9  | 27.0  | 26.1  | 26.7  | 27.7  | 29.1  | 30.2  |
| Atad2   | 5.9   | 8.4   | 11.6  | 5.4   | 10.0  | 5.2   | 11.2  | 7.5   | 8.0   | 6.1   | 8.9   | 6.3   |
| Atad2b  | 2.0   | 2.3   | 2.7   | 1.9   | 2.3   | 2.1   | 2.3   | 2.4   | 2.4   | 2.4   | 2.8   | 3.0   |
| Atad3a  | 7.7   | 6.8   | 6.2   | 7.2   | 7.1   | 6.7   | 9.0   | 7.0   | 7.1   | 8.6   | 7.1   | 6.8   |
| Atad5   | 0.6   | 1.1   | 1.3   | 0.5   | 1.1   | 0.5   | 0.8   | 0.9   | 0.7   | 0.7   | 0.7   | 0.8   |
| Atat1   | 11.2  | 12.6  | 12.8  | 12.8  | 9.2   | 11.7  | 12.0  | 10.5  | 10.6  | 12.4  | 13.7  | 11.0  |
| Atcay   | 0.0   | 0.0   | 0.0   | 0.0   | 0.0   | 0.0   | 0.0   | 0.0   | 0.0   | 0.0   | 0.0   | 0.0   |
| Ate1    | 16.0  | 16.7  | 14.8  | 17.5  | 16.1  | 16.3  | 17.3  | 11.1  | 15.4  | 16.4  | 17.5  | 17.4  |
| Atf1    | 7.6   | 7.7   | 10.0  | 8.8   | 8.6   | 8.9   | 9.6   | 9.5   | 7.9   | 8.0   | 9.2   | 9.8   |
| Atf2    | 8.3   | 9.3   | 10.5  | 10.1  | 8.7   | 9.8   | 8.9   | 9.4   | 8.5   | 8.5   | 10.2  | 10.0  |
| Atf3    | 4.3   | 1.6   | 1.2   | 11.7  | 13.2  | 1.5   | 4.4   | 0.8   | 2.1   | 7.1   | 3.5   | 2.4   |
| Atf4    | 145.1 | 98.6  | 81.0  | 140.2 | 99.2  | 134.2 | 130.0 | 133.5 | 130.0 | 100.7 | 138.7 | 109.6 |
| Atf5    | 101.4 | 66.9  | 46.1  | 124.9 | 53.4  | 127.0 | 69.7  | 101.9 | 87.4  | 48.2  | 76.9  | 54.3  |
| Atf6    | 13.9  | 11.2  | 10.9  | 16.0  | 11.6  | 13.6  | 10.9  | 11.4  | 10.6  | 12.2  | 11.6  | 12.4  |
| Atf6b   | 7.6   | 7.9   | 8.3   | 7.5   | 9.2   | 8.2   | 8.4   | 9.2   | 8.6   | 7.9   | 7.3   | 7.2   |
| Atf7    | 1.4   | 1.9   | 2.4   | 1.4   | 1.6   | 1.8   | 1.9   | 2.4   | 2.0   | 1.4   | 1.6   | 1.8   |
| Atf7ip  | 7.1   | 8.1   | 10.4  | 6.5   | 7.6   | 6.1   | 8.3   | 8.5   | 7.2   | 6.7   | 8.3   | 7.3   |
| Atf7ip2 | 0.1   | 0.2   | 0.3   | 0.1   | 0.3   | 0.0   | 0.2   | 0.1   | 0.1   | 0.1   | 0.1   | 0.3   |
| Atg10   | 10.1  | 8.9   | 6.7   | 9.0   | 9.0   | 9.2   | 7.8   | 6.3   | 7.4   | 6.9   | 8.3   | 8.5   |
| Atg12   | 38.9  | 33.0  | 26.3  | 47.8  | 33.5  | 40.4  | 28.5  | 19.8  | 27.1  | 30.2  | 30.4  | 29.3  |
| Atg13   | 5.9   | 6.4   | 6.4   | 6.9   | 6.9   | 6.2   | 6.8   | 6.9   | 6.5   | 6.9   | 6.1   | 7.5   |
| Atg14   | 4.1   | 4.7   | 4.0   | 4.2   | 3.7   | 5.1   | 3.3   | 4.1   | 4.1   | 4.1   | 3.8   | 3.7   |
| Atg16l1 | 9.2   | 8.3   | 7.4   | 8.6   | 8.8   | 8.2   | 8.5   | 7.8   | 9.2   | 9.4   | 9.1   | 8.6   |
| Atg16l2 | 4.2   | 4.9   | 4.8   | 3.4   | 4.3   | 3.9   | 3.8   | 4.9   | 7.0   | 4.6   | 3.2   | 4.6   |
| Atg2a   | 4.1   | 4.2   | 3.9   | 4.0   | 4.8   | 4.2   | 4.7   | 3.8   | 4.6   | 5.1   | 3.8   | 2.9   |
| Atg2b   | 5.4   | 5.6   | 5.6   | 4.2   | 4.9   | 4.8   | 5.3   | 4.6   | 4.8   | 5.0   | 4.8   | 4.7   |
| Atg3    | 26.0  | 26.9  | 32.5  | 30.4  | 25.3  | 24.3  | 29.0  | 28.2  | 24.1  | 29.3  | 31.9  | 37.6  |
| Atg4a   | 14.3  | 12.5  | 12.3  | 15.0  | 11.7  | 13.1  | 12.0  | 10.7  | 10.9  | 10.4  | 12.4  | 13.2  |
| Atg4b   | 14.6  | 14.1  | 11.6  | 14.8  | 12.7  | 13.9  | 13.4  | 11.9  | 13.0  | 13.5  | 12.6  | 12.4  |
| Atg4c   | 2.2   | 2.5   | 2.9   | 2.9   | 2.8   | 2.8   | 2.8   | 3.0   | 2.2   | 2.4   | 2.0   | 2.5   |
| Atg4d   | 2.3   | 2.6   | 2.5   | 2.0   | 2.5   | 1.7   | 2.8   | 2.5   | 2.9   | 2.9   | 2.5   | 2.4   |
| Atg5    | 13.0  | 12.3  | 11.8  | 13.2  | 12.3  | 12.3  | 10.9  | 12.8  | 11.3  | 12.2  | 12.8  | 12.2  |
| Atg7    | 7.6   | 6.3   | 5.5   | 8.3   | 7.6   | 7.9   | 6.1   | 5.9   | 5.8   | 6.0   | 5.8   | 6.1   |
| Atg9a   | 7.4   | 8.0   | 7.8   | 7.6   | 7.7   | 7.5   | 8.6   | 9.2   | 8.7   | 6.8   | 7.4   | 6.3   |
| Atg9b   | 0.1   | 0.0   | 0.1   | 0.0   | 0.1   | 0.1   | 0.1   | 0.0   | 0.1   | 0.0   | 0.1   | 0.0   |
| Athl1   | 9.1   | 8.6   | 8.1   | 8.9   | 7.5   | 7.8   | 7.6   | 9.1   | 8.7   | 9.6   | 8.1   | 8.9   |
| Atic    | 32.9  | 27.8  | 23.5  | 33.0  | 29.4  | 32.2  | 29.1  | 25.9  | 24.7  | 31.2  | 29.9  | 27.5  |
| Atl1    | 7.4   | 7.9   | 6.3   | 8.8   | 6.3   | 10.1  | 7.6   | 4.9   | 6.1   | 5.4   | 6.8   | 6.5   |
| Atl2    | 6.9   | 7.2   | 7.3   | 6.3   | 6.8   | 5.8   | 6.5   | 6.5   | 7.6   | 8.9   | 7.2   | 8.2   |
| Atl3    | 22.8  | 26.2  | 26.8  | 21.1  | 24.7  | 20.1  | 26.9  | 27.6  | 29.1  | 28.6  | 30.0  | 32.6  |
| Atm     | 3.7   | 3.5   | 3.4   | 3.4   | 3.2   | 4.0   | 2.6   | 3.3   | 2.5   | 3.6   | 3.1   | 3.1   |
| Atmin   | 6.2   | 6.4   | 5.4   | 6.1   | 5.7   | 7.3   | 4.7   | 5.7   | 5.3   | 5.1   | 5.1   | 4.7   |
| Atn1    | 1.2   | 2.2   | 2.7   | 1.7   | 2.4   | 1.8   | 3.5   | 3.7   | 3.6   | 2.1   | 2.2   | 2.0   |
| Atoh8   | 40.5  | 67.9  | 88.7  | 30.9  | 40.6  | 31.1  | 59.8  | 74.2  | 60.2  | 43.1  | 48.9  | 54.8  |
| Atox1   | 216.1 | 160.4 | 115.1 | 185.6 | 219.2 | 166.3 | 132.1 | 109.9 | 143.1 | 181.5 | 133.8 | 142.0 |
| Atp10a  | 3.0   | 3.6   | 4.2   | 2.7   | 4.6   | 2.3   | 5.5   | 6.6   | 6.5   | 3.6   | 5.1   | 4.3   |
| Atp10b  | 0.0   | 0.0   | 0.0   | 0.0   | 0.0   | 0.0   | 0.0   | 0.0   | 0.0   | 0.0   | 0.0   | 0.0   |
| Atp10d  | 3.5   | 4.4   | 3.5   | 2.6   | 2.7   | 2.5   | 2.1   | 2.9   | 2.4   | 2.3   | 2.7   | 2.4   |
| Atp11a  | 29.4  | 24.0  | 22.1  | 30.5  | 25.1  | 26.0  | 28.6  | 24.8  | 22.3  | 23.0  | 25.3  | 22.9  |
| Atp11b  | 7.2   | 8.2   | 8.4   | 7.5   | 7.8   | 7.0   | 6.9   | 6.6   | 6.9   | 8.8   | 7.6   | 8.5   |
| Atp11c  | 1.7   | 2.4   | 3.1   | 2.2   | 2.6   | 1.8   | 2.2   | 2.5   | 2.3   | 2.0   | 2.1   | 2.2   |

Online Table 1



|             |       |       |       |       |       |       |       |       |       |       |       |       |
|-------------|-------|-------|-------|-------|-------|-------|-------|-------|-------|-------|-------|-------|
| Atp12a      | 0.0   | 0.0   | 0.0   | 0.0   | 0.0   | 0.0   | 0.0   | 0.0   | 0.0   | 0.0   | 0.0   | 0.0   |
| Atp13a1     | 9.3   | 10.0  | 9.2   | 10.5  | 10.5  | 9.8   | 11.5  | 10.9  | 10.4  | 10.8  | 9.1   | 8.5   |
| Atp13a2     | 4.6   | 4.2   | 3.4   | 6.7   | 10.0  | 4.7   | 4.2   | 3.3   | 3.5   | 5.1   | 3.8   | 3.4   |
| Atp13a3     | 22.3  | 24.8  | 21.7  | 17.3  | 23.6  | 17.9  | 23.3  | 21.6  | 26.0  | 24.6  | 27.8  | 25.5  |
| Atp13a5     | 0.5   | 0.1   | 0.1   | 0.6   | 0.3   | 0.2   | 0.4   | 0.0   | 0.1   | 0.2   | 0.1   | 0.1   |
| Atp1a1      | 101.1 | 106.9 | 101.9 | 80.1  | 102.3 | 78.5  | 129.0 | 120.5 | 125.1 | 143.0 | 127.5 | 119.3 |
| Atp1a2      | 0.2   | 0.3   | 1.1   | 0.0   | 0.1   | 0.0   | 0.1   | 0.4   | 0.1   | 0.0   | 0.0   | 0.1   |
| Atp1a3      | 0.1   | 0.0   | 0.0   | 0.4   | 1.0   | 0.0   | 0.1   | 0.0   | 0.0   | 0.1   | 0.1   | 0.1   |
| Atp1a4      | 0.3   | 0.2   | 0.2   | 0.4   | 0.1   | 0.1   | 0.1   | 0.1   | 0.1   | 0.1   | 0.1   | 0.2   |
| Atp1b1      | 8.2   | 4.7   | 4.5   | 6.2   | 3.4   | 4.4   | 1.9   | 2.5   | 3.5   | 31.3  | 9.4   | 9.1   |
| Atp1b2      | 0.0   | 0.0   | 0.0   | 0.0   | 0.0   | 0.0   | 0.0   | 0.0   | 0.0   | 0.1   | 0.0   | 0.0   |
| Atp1b3      | 108.7 | 89.3  | 72.8  | 111.4 | 100.4 | 100.6 | 84.2  | 70.0  | 80.9  | 99.3  | 91.1  | 93.9  |
| Atp1b4      | 0.0   | 0.0   | 0.0   | 0.0   | 0.0   | 0.0   | 0.0   | 0.0   | 0.0   | 0.0   | 0.0   | 0.0   |
| Atp2a1      | 0.0   | 0.0   | 0.0   | 0.0   | 0.0   | 0.0   | 0.0   | 0.0   | 0.0   | 0.0   | 0.0   | 0.0   |
| Atp2a2      | 51.9  | 49.3  | 47.0  | 48.8  | 50.3  | 39.3  | 56.3  | 52.6  | 56.0  | 54.5  | 54.8  | 52.2  |
| Atp2a3      | 0.3   | 0.1   | 0.1   | 1.4   | 2.4   | 0.1   | 0.3   | 0.1   | 0.2   | 0.2   | 0.1   | 0.1   |
| Atp2b1      | 9.0   | 9.6   | 11.7  | 10.4  | 13.2  | 7.3   | 11.5  | 15.2  | 12.2  | 11.2  | 12.6  | 13.6  |
| Atp2b2      | 0.0   | 0.0   | 0.0   | 0.0   | 0.0   | 0.0   | 0.0   | 0.0   | 0.0   | 0.0   | 0.0   | 0.0   |
| Atp2b4      | 0.7   | 0.7   | 1.1   | 0.4   | 1.1   | 0.3   | 1.0   | 1.2   | 1.1   | 3.3   | 2.6   | 1.2   |
| Atp2c1      | 30.9  | 31.6  | 30.3  | 31.2  | 28.3  | 28.9  | 31.9  | 26.8  | 33.7  | 28.1  | 31.8  | 32.9  |
| Atp4a       | 0.0   | 0.0   | 0.0   | 0.0   | 0.0   | 0.0   | 0.0   | 0.0   | 0.0   | 0.0   | 0.0   | 0.0   |
| Atp5a1      | 152.3 | 132.7 | 123.2 | 136.1 | 138.8 | 129.3 | 128.7 | 138.7 | 132.6 | 149.9 | 133.2 | 143.0 |
| Atp5b       | 428.3 | 365.6 | 299.1 | 417.5 | 360.0 | 368.0 | 357.5 | 342.1 | 336.0 | 375.3 | 380.6 | 342.3 |
| Atp5c1      | 121.4 | 109.7 | 97.4  | 115.3 | 108.4 | 113.6 | 101.2 | 102.9 | 95.6  | 113.7 | 113.4 | 108.0 |
| Atp5d       | 98.9  | 86.7  | 84.7  | 89.1  | 88.8  | 95.1  | 93.9  | 97.4  | 94.1  | 98.2  | 89.6  | 87.5  |
| Atp5e       | 238.0 | 212.3 | 149.4 | 148.8 | 201.6 | 195.1 | 164.8 | 183.1 | 219.5 | 218.6 | 163.4 | 154.4 |
| Atp5f1      | 100.8 | 89.9  | 91.2  | 109.9 | 93.1  | 93.0  | 98.3  | 95.7  | 88.4  | 99.8  | 112.6 | 113.7 |
| Atp5g1      | 98.7  | 68.5  | 54.5  | 93.9  | 80.6  | 85.1  | 77.3  | 88.8  | 69.4  | 81.6  | 83.0  | 60.8  |
| Atp5g2      | 137.8 | 122.1 | 100.5 | 108.1 | 110.5 | 134.7 | 108.7 | 132.6 | 126.9 | 134.7 | 126.0 | 111.8 |
| Atp5g3      | 100.1 | 108.0 | 75.6  | 90.9  | 101.7 | 90.2  | 82.4  | 87.8  | 103.0 | 109.4 | 86.3  | 88.8  |
| Atp5h       | 237.5 | 189.2 | 219.2 | 245.1 | 190.8 | 236.7 | 215.4 | 216.9 | 183.6 | 223.1 | 239.2 | 227.7 |
| Atp5j       | 100.9 | 96.7  | 81.6  | 102.9 | 90.7  | 92.4  | 77.0  | 92.7  | 86.9  | 101.2 | 93.8  | 92.7  |
| Atp5j2      | 236.1 | 188.2 | 170.4 | 204.5 | 201.6 | 228.5 | 183.6 | 194.4 | 196.5 | 229.4 | 199.8 | 196.5 |
| Atp5k       | 224.9 | 206.2 | 196.3 | 208.3 | 203.0 | 209.0 | 170.0 | 202.6 | 219.0 | 211.0 | 190.2 | 235.6 |
| Atp5l       | 246.5 | 230.7 | 184.5 | 213.0 | 249.2 | 230.5 | 195.0 | 205.9 | 221.4 | 258.2 | 226.1 | 231.3 |
| Atp5o       | 140.3 | 127.4 | 122.2 | 118.3 | 128.0 | 121.8 | 126.2 | 142.3 | 124.7 | 131.7 | 127.8 | 127.8 |
| Atp5s       | 7.0   | 6.8   | 5.9   | 6.3   | 4.9   | 8.4   | 4.5   | 4.7   | 4.8   | 5.7   | 5.6   | 6.3   |
| Atp5sl      | 3.6   | 3.1   | 3.2   | 4.4   | 3.1   | 4.4   | 2.7   | 3.4   | 2.7   | 3.6   | 2.7   | 3.4   |
| Atp6ap1     | 141.9 | 114.5 | 95.5  | 163.0 | 124.7 | 154.5 | 90.6  | 101.9 | 89.2  | 100.9 | 101.5 | 106.7 |
| Atp6ap2     | 59.1  | 41.4  | 34.1  | 67.4  | 58.0  | 67.0  | 30.7  | 34.0  | 33.0  | 40.0  | 41.7  | 45.1  |
| Atp6v0a1    | 16.1  | 12.5  | 10.8  | 18.3  | 16.3  | 15.9  | 12.7  | 9.6   | 10.3  | 12.5  | 11.1  | 10.6  |
| Atp6v0a2    | 18.9  | 16.8  | 17.2  | 19.6  | 20.5  | 17.1  | 18.4  | 20.9  | 19.2  | 21.2  | 19.2  | 19.9  |
| Atp6v0a4    | 0.2   | 0.2   | 0.1   | 0.1   | 0.1   | 0.1   | 0.1   | 0.1   | 0.1   | 0.2   | 0.1   | 0.1   |
| Atp6v0b     | 87.8  | 71.9  | 57.4  | 106.9 | 99.1  | 91.0  | 74.1  | 64.2  | 76.0  | 92.1  | 71.3  | 77.1  |
| Atp6v0c     | 207.5 | 160.5 | 140.0 | 249.0 | 235.9 | 205.1 | 171.7 | 148.0 | 150.1 | 175.5 | 157.1 | 155.6 |
| Atp6v0c-ps2 | 5.1   | 4.5   | 1.1   | 10.5  | 16.1  | 12.2  | 0.0   | 1.1   | 1.5   | 7.8   | 0.0   | 1.8   |
| Atp6v0d1    | 64.5  | 53.7  | 41.0  | 70.0  | 63.6  | 64.4  | 52.9  | 48.6  | 47.5  | 60.2  | 59.6  | 56.1  |
| Atp6v0d2    | 0.2   | 0.1   | 0.1   | 1.6   | 0.4   | 0.1   | 0.0   | 0.0   | 0.0   | 0.1   | 0.1   | 0.2   |
| Atp6v0e     | 184.9 | 136.5 | 108.9 | 204.2 | 153.4 | 156.4 | 136.1 | 116.6 | 130.1 | 155.3 | 144.5 | 129.8 |
| Atp6v0e2    | 6.1   | 3.0   | 1.9   | 4.1   | 1.1   | 6.9   | 1.3   | 1.5   | 0.9   | 5.5   | 3.7   | 2.3   |
| Atp6v1a     | 78.1  | 63.3  | 56.2  | 86.4  | 77.5  | 81.5  | 51.2  | 52.6  | 52.1  | 66.6  | 60.6  | 64.8  |
| Atp6v1b1    | 0.4   | 0.2   | 0.0   | 0.1   | 0.2   | 0.3   | 0.1   | 0.0   | 0.1   | 0.0   | 0.0   | 0.0   |
| Atp6v1b2    | 30.4  | 28.6  | 22.4  | 32.3  | 41.0  | 26.6  | 25.2  | 23.6  | 25.9  | 30.6  | 26.2  | 26.2  |
| Atp6v1c1    | 49.2  | 41.2  | 32.0  | 51.8  | 44.2  | 47.0  | 35.2  | 30.2  | 33.7  | 39.5  | 38.5  | 38.8  |
| Atp6v1c2    | 0.1   | 0.0   | 0.1   | 0.0   | 0.0   | 0.0   | 0.0   | 0.0   | 0.0   | 0.0   | 0.1   | 0.0   |
| Atp6v1d     | 63.2  | 55.8  | 55.8  | 71.7  | 56.7  | 63.7  | 51.7  | 50.2  | 42.9  | 58.9  | 59.9  | 70.1  |
| Atp6v1e1    | 138.9 | 93.0  | 75.9  | 136.5 | 112.8 | 118.0 | 80.2  | 72.0  | 78.6  | 108.3 | 106.0 | 103.9 |

Online Table 1

|          |       |       |       |       |       |       |       |       |       |       |       |       |
|----------|-------|-------|-------|-------|-------|-------|-------|-------|-------|-------|-------|-------|
| Atp6v1e2 | 0.0   | 0.0   | 0.0   | 0.0   | 0.0   | 0.0   | 0.0   | 0.0   | 0.0   | 0.0   | 0.1   | 0.0   |
| Atp6v1f  | 155.7 | 109.0 | 93.8  | 172.2 | 114.8 | 148.4 | 96.6  | 91.7  | 90.0  | 122.3 | 107.6 | 105.7 |
| Atp6v1g1 | 104.1 | 89.3  | 70.2  | 126.8 | 91.1  | 116.4 | 74.1  | 77.9  | 80.4  | 92.7  | 88.5  | 86.2  |
| Atp6v1g2 | 0.2   | 0.2   | 0.1   | 0.1   | 0.3   | 0.4   | 0.2   | 0.5   | 0.4   | 0.4   | 0.3   | 0.5   |
| Atp6v1h  | 81.8  | 60.9  | 46.4  | 79.2  | 64.7  | 72.1  | 49.3  | 39.5  | 52.0  | 70.5  | 56.6  | 63.3  |
| Atp7a    | 6.0   | 7.2   | 7.6   | 5.9   | 7.4   | 4.9   | 5.9   | 7.7   | 5.7   | 6.9   | 6.9   | 6.7   |
| Atp7b    | 0.0   | 0.0   | 0.0   | 0.0   | 0.0   | 0.1   | 0.0   | 0.0   | 0.0   | 0.0   | 0.0   | 0.0   |
| Atp8a1   | 0.5   | 0.3   | 0.3   | 1.1   | 1.7   | 0.4   | 0.4   | 0.4   | 0.3   | 1.1   | 0.4   | 0.6   |
| Atp8a2   | 0.1   | 0.1   | 0.0   | 0.0   | 0.1   | 0.1   | 0.0   | 0.0   | 0.0   | 0.0   | 0.1   | 0.1   |
| Atp8b1   | 9.2   | 10.5  | 11.2  | 12.4  | 13.6  | 11.2  | 7.8   | 8.6   | 6.9   | 5.6   | 5.9   | 7.3   |
| Atp8b2   | 32.9  | 37.0  | 33.8  | 33.5  | 32.9  | 32.8  | 38.5  | 38.4  | 39.6  | 30.0  | 32.0  | 33.1  |
| Atp8b3   | 0.0   | 0.0   | 0.0   | 0.0   | 0.1   | 0.0   | 0.0   | 0.0   | 0.0   | 0.0   | 0.0   | 0.0   |
| Atp8b4   | 0.4   | 0.3   | 0.2   | 2.8   | 5.1   | 0.2   | 0.7   | 0.2   | 0.1   | 0.6   | 0.1   | 0.3   |
| Atp8b5   | 0.1   | 0.1   | 0.1   | 0.1   | 0.1   | 0.2   | 0.1   | 0.2   | 0.1   | 0.4   | 0.2   | 0.1   |
| Atp9a    | 52.9  | 41.9  | 33.0  | 55.3  | 37.5  | 61.6  | 38.6  | 32.7  | 32.6  | 35.9  | 34.8  | 36.9  |
| Atp9b    | 15.8  | 14.1  | 13.0  | 15.6  | 15.3  | 15.2  | 16.9  | 15.0  | 15.8  | 14.5  | 15.2  | 15.1  |
| Atpaf1   | 4.9   | 4.7   | 4.8   | 5.0   | 4.8   | 4.9   | 4.2   | 4.9   | 4.4   | 4.4   | 4.8   | 4.1   |
| Atpaf2   | 9.1   | 9.2   | 7.3   | 11.1  | 8.3   | 9.5   | 9.2   | 8.5   | 7.6   | 7.6   | 6.8   | 7.1   |
| Atpbd4   | 2.1   | 2.0   | 1.6   | 2.3   | 2.4   | 2.4   | 2.6   | 2.2   | 1.6   | 2.1   | 2.6   | 2.2   |
| Atpif1   | 177.5 | 168.0 | 185.4 | 215.1 | 172.7 | 204.1 | 172.8 | 190.5 | 156.3 | 188.0 | 219.3 | 192.5 |
| Atr      | 4.4   | 4.4   | 3.6   | 3.8   | 4.3   | 3.7   | 3.4   | 3.4   | 3.3   | 3.8   | 4.1   | 3.5   |
| Atraid   | 76.2  | 66.7  | 60.7  | 62.4  | 59.5  | 75.0  | 61.4  | 60.4  | 66.0  | 72.1  | 60.8  | 80.6  |
| Atrip    | 4.2   | 5.2   | 4.2   | 4.7   | 3.6   | 3.6   | 3.6   | 3.8   | 4.2   | 4.4   | 4.0   | 3.9   |
| Atrn     | 9.7   | 9.5   | 9.6   | 10.6  | 11.4  | 8.5   | 10.1  | 10.7  | 10.5  | 9.3   | 10.3  | 9.6   |
| Atrnl1   | 10.8  | 10.3  | 11.3  | 9.3   | 10.8  | 10.0  | 9.0   | 11.5  | 10.9  | 8.7   | 8.5   | 9.3   |
| Atrx     | 16.5  | 16.2  | 20.5  | 17.3  | 16.0  | 15.9  | 15.4  | 18.2  | 13.8  | 17.3  | 19.1  | 19.1  |
| Atxn1    | 4.3   | 6.5   | 7.8   | 4.2   | 6.1   | 3.9   | 6.9   | 7.0   | 6.6   | 6.1   | 6.4   | 6.6   |
| Atxn10   | 55.1  | 47.7  | 47.5  | 48.6  | 44.4  | 45.5  | 45.0  | 49.5  | 41.3  | 44.1  | 46.1  | 49.1  |
| Atxn11   | 6.7   | 8.1   | 7.6   | 7.8   | 7.7   | 6.5   | 7.8   | 7.3   | 8.2   | 6.4   | 7.3   | 7.3   |
| Atxn2    | 3.6   | 5.1   | 5.5   | 4.8   | 4.4   | 5.1   | 6.1   | 4.5   | 4.6   | 3.9   | 5.3   | 4.3   |
| Atxn2l   | 5.6   | 7.1   | 7.1   | 6.8   | 7.0   | 7.0   | 8.5   | 6.8   | 6.9   | 5.5   | 6.0   | 4.6   |
| Atxn3    | 11.3  | 10.9  | 10.2  | 13.3  | 9.7   | 11.3  | 8.5   | 7.9   | 8.1   | 10.4  | 9.0   | 9.9   |
| Atxn7    | 3.7   | 4.5   | 4.3   | 3.8   | 4.0   | 3.4   | 4.5   | 3.3   | 4.0   | 3.4   | 4.3   | 4.1   |
| Atxn7l1  | 1.7   | 2.7   | 2.7   | 3.8   | 2.6   | 3.1   | 2.8   | 2.4   | 1.8   | 1.5   | 1.6   | 1.8   |
| Atxn7l2  | 0.3   | 0.2   | 0.4   | 0.3   | 0.3   | 0.2   | 0.2   | 0.4   | 0.3   | 0.4   | 0.3   | 0.5   |
| Atxn7l3  | 9.6   | 11.2  | 10.0  | 9.0   | 10.0  | 10.4  | 10.2  | 11.3  | 12.5  | 11.4  | 10.1  | 10.0  |
| Atxn7l3b | 22.8  | 20.7  | 20.2  | 20.8  | 21.1  | 22.9  | 18.3  | 20.7  | 23.9  | 25.4  | 21.9  | 20.7  |
| AU015228 | 0.1   | 0.1   | 0.0   | 0.0   | 0.1   | 0.0   | 0.1   | 0.0   | 0.0   | 0.0   | 0.0   | 0.0   |
| AU015836 | 0.0   | 0.0   | 0.0   | 0.0   | 0.0   | 0.1   | 0.0   | 0.0   | 0.0   | 0.0   | 0.0   | 0.0   |
| AU019823 | 4.3   | 4.1   | 4.4   | 4.9   | 5.5   | 4.6   | 4.6   | 4.6   | 4.4   | 5.1   | 5.3   | 5.3   |
| AU021063 | 0.5   | 0.6   | 0.3   | 0.2   | 0.2   | 0.4   | 0.4   | 0.7   | 0.5   | 0.1   | 0.1   | 0.7   |
| AU021092 | 1.9   | 0.6   | 0.4   | 1.0   | 0.6   | 0.8   | 0.7   | 0.6   | 0.5   | 0.5   | 0.8   | 0.3   |
| AU022252 | 5.6   | 6.0   | 5.7   | 6.1   | 6.0   | 6.1   | 5.5   | 6.9   | 6.2   | 6.2   | 6.1   | 6.1   |
| AU022793 | 0.0   | 0.0   | 0.0   | 0.1   | 0.2   | 0.0   | 0.1   | 0.0   | 0.0   | 0.0   | 0.0   | 0.0   |
| AU023762 | 0.0   | 0.0   | 0.0   | 0.0   | 0.0   | 0.0   | 0.0   | 0.0   | 0.0   | 0.0   | 0.0   | 0.0   |
| AU023871 | 0.0   | 0.0   | 0.0   | 0.0   | 0.0   | 0.0   | 0.1   | 0.1   | 0.0   | 0.0   | 0.0   | 0.0   |
| AU040320 | 9.0   | 9.7   | 9.6   | 9.5   | 8.9   | 8.3   | 9.6   | 10.8  | 11.0  | 7.8   | 8.9   | 9.2   |
| AU040972 | 0.0   | 0.1   | 0.2   | 0.3   | 0.1   | 0.0   | 0.2   | 0.2   | 0.0   | 0.1   | 0.0   | 0.0   |
| AU041133 | 1.6   | 1.8   | 1.5   | 1.4   | 1.5   | 1.9   | 0.8   | 1.4   | 1.6   | 2.0   | 1.8   | 1.8   |
| Auh      | 15.7  | 14.1  | 15.2  | 15.3  | 11.5  | 12.5  | 15.1  | 16.4  | 14.9  | 15.7  | 14.6  | 18.1  |
| Aup1     | 33.7  | 31.7  | 31.3  | 43.1  | 37.9  | 38.3  | 37.8  | 33.3  | 36.8  | 35.8  | 36.4  | 36.8  |
| Aurka    | 2.9   | 4.8   | 8.0   | 1.3   | 6.8   | 0.7   | 11.0  | 3.3   | 7.7   | 4.2   | 7.2   | 4.7   |
| Aurkaip1 | 41.8  | 31.1  | 27.2  | 42.1  | 33.5  | 39.0  | 33.7  | 35.2  | 35.6  | 39.8  | 35.0  | 36.3  |
| Aurkb    | 1.5   | 3.2   | 5.1   | 1.1   | 5.0   | 1.0   | 6.5   | 2.4   | 4.5   | 2.2   | 2.6   | 2.5   |
| Aurkc    | 0.1   | 0.0   | 0.0   | 0.2   | 0.1   | 0.2   | 0.1   | 0.1   | 0.0   | 0.1   | 0.0   | 0.1   |
| Auts2    | 0.4   | 0.6   | 0.8   | 0.2   | 0.4   | 0.4   | 0.3   | 0.6   | 0.4   | 0.6   | 0.3   | 0.4   |
| AV039307 | 0.3   | 0.5   | 0.1   | 0.4   | 0.4   | 1.0   | 0.2   | 0.5   | 0.2   | 0.4   | 0.3   | 0.3   |

Online Table 1

|               |        |        |        |        |        |        |       |       |       |       |       |       |
|---------------|--------|--------|--------|--------|--------|--------|-------|-------|-------|-------|-------|-------|
| AV051173      | 0.6    | 1.0    | 0.5    | 2.2    | 1.9    | 0.9    | 0.9   | 0.9   | 0.9   | 1.9   | 1.2   | 0.7   |
| Aven          | 6.2    | 5.9    | 5.6    | 5.0    | 6.2    | 3.7    | 6.1   | 7.2   | 5.8   | 6.5   | 5.7   | 5.2   |
| Avil          | 0.6    | 0.4    | 0.5    | 0.4    | 0.2    | 0.6    | 0.3   | 0.4   | 0.4   | 0.3   | 0.4   | 0.3   |
| Avl9          | 6.6    | 7.6    | 6.7    | 6.9    | 6.6    | 7.5    | 5.4   | 5.3   | 5.9   | 7.6   | 7.5   | 7.5   |
| Avpi1         | 12.7   | 12.8   | 9.7    | 9.7    | 8.4    | 12.0   | 11.8  | 11.7  | 12.7  | 12.3  | 11.8  | 10.4  |
| Avpr1a        | 2.5    | 4.3    | 7.9    | 3.9    | 6.1    | 1.8    | 7.5   | 6.9   | 6.3   | 3.7   | 3.7   | 3.7   |
| Avpr1b        | 0.0    | 0.0    | 0.0    | 0.1    | 0.0    | 0.0    | 0.0   | 0.0   | 0.0   | 0.0   | 0.0   | 0.0   |
| AW011738      | 0.5    | 0.4    | 0.4    | 0.4    | 0.6    | 0.6    | 0.6   | 0.6   | 0.5   | 0.5   | 0.3   | 0.5   |
| AW046200      | 0.1    | 0.1    | 0.1    | 0.0    | 0.1    | 0.0    | 0.1   | 0.1   | 0.1   | 0.1   | 0.1   | 0.1   |
| AW112010      | 0.9    | 0.4    | 0.4    | 1.2    | 1.1    | 0.2    | 0.8   | 0.3   | 0.3   | 0.1   | 0.0   | 0.2   |
| AW146154      | 2.2    | 1.9    | 2.2    | 2.5    | 1.8    | 2.5    | 1.7   | 2.1   | 2.0   | 2.1   | 2.4   | 2.5   |
| AW209491      | 8.5    | 6.6    | 5.5    | 6.9    | 5.5    | 7.6    | 5.0   | 5.7   | 5.4   | 6.1   | 6.8   | 6.0   |
| AW549877      | 8.3    | 10.1   | 10.1   | 10.7   | 9.6    | 12.8   | 9.2   | 9.5   | 10.7  | 10.4  | 10.9  | 11.0  |
| AW551984      | 0.0    | 0.0    | 0.0    | 0.0    | 0.0    | 0.0    | 0.0   | 0.1   | 0.0   | 0.0   | 0.0   | 0.0   |
| AW554918      | 1.2    | 1.3    | 1.5    | 1.5    | 1.1    | 1.4    | 1.6   | 1.5   | 1.2   | 1.1   | 1.2   | 1.1   |
| Awat2         | 0.2    | 0.1    | 0.0    | 0.0    | 0.2    | 0.6    | 0.0   | 0.1   | 0.0   | 0.2   | 0.1   | 0.1   |
| Axin1         | 8.3    | 8.9    | 8.2    | 8.1    | 7.6    | 7.6    | 8.4   | 7.9   | 8.5   | 7.3   | 8.6   | 8.1   |
| Axin2         | 0.1    | 0.1    | 0.1    | 0.1    | 0.1    | 0.0    | 0.1   | 0.1   | 0.0   | 0.4   | 0.1   | 0.2   |
| Axl           | 123.5  | 129.1  | 99.6   | 126.9  | 130.4  | 148.4  | 154.3 | 130.4 | 136.3 | 141.3 | 141.5 | 125.5 |
| AY074887      | 1.6    | 0.9    | 0.6    | 2.2    | 1.0    | 1.6    | 1.1   | 0.9   | 1.0   | 1.1   | 0.8   | 0.5   |
| AY358078      | 0.0    | 0.0    | 0.1    | 0.2    | 0.0    | 0.1    | 0.0   | 0.0   | 0.0   | 0.0   | 0.1   | 0.0   |
| AY512931      | 0.1    | 0.3    | 0.2    | 0.1    | 0.1    | 0.1    | 0.2   | 0.1   | 0.1   | 0.1   | 0.1   | 0.2   |
| Azi1          | 3.1    | 4.1    | 4.3    | 3.0    | 2.8    | 3.5    | 3.5   | 3.4   | 3.2   | 3.0   | 3.0   | 2.8   |
| Azi2          | 16.1   | 15.3   | 14.5   | 16.9   | 14.8   | 16.0   | 13.2  | 12.8  | 14.5  | 15.2  | 14.8  | 16.2  |
| Azin1         | 23.9   | 24.8   | 21.0   | 26.2   | 26.1   | 23.6   | 22.4  | 17.7  | 22.8  | 22.0  | 22.7  | 23.1  |
| B020004J07Rik | 0.1    | 0.1    | 0.1    | 0.0    | 0.1    | 0.1    | 0.1   | 0.1   | 0.1   | 0.1   | 0.1   | 0.0   |
| B130006D01Rik | 0.1    | 0.2    | 0.2    | 0.1    | 0.2    | 0.2    | 0.1   | 0.2   | 0.1   | 0.1   | 0.1   | 0.2   |
| B130024G19Rik | 0.0    | 0.2    | 0.2    | 0.1    | 0.1    | 0.1    | 0.1   | 0.1   | 0.1   | 0.2   | 0.1   | 0.2   |
| B130034C11Rik | 0.1    | 0.2    | 0.1    | 0.3    | 0.2    | 0.1    | 0.1   | 0.1   | 0.0   | 0.0   | 0.1   | 0.1   |
| B230118H07Rik | 8.3    | 7.4    | 6.8    | 10.0   | 5.2    | 10.8   | 5.2   | 5.3   | 4.2   | 4.9   | 5.9   | 6.1   |
| B230120H23Rik | 26.6   | 21.4   | 19.3   | 23.0   | 22.7   | 21.0   | 20.5  | 15.8  | 14.9  | 22.8  | 22.0  | 19.2  |
| B230206H07Rik | 0.0    | 0.0    | 0.0    | 0.1    | 0.0    | 0.0    | 0.0   | 0.0   | 0.0   | 0.1   | 0.1   | 0.0   |
| B230208H11Rik | 0.2    | 0.1    | 0.1    | 0.1    | 0.2    | 0.0    | 0.0   | 0.0   | 0.1   | 0.2   | 0.0   | 0.2   |
| B230216G23Rik | 0.3    | 0.4    | 0.3    | 0.1    | 0.2    | 0.4    | 0.4   | 0.3   | 0.3   | 0.4   | 0.3   | 0.2   |
| B230216N24Rik | 0.1    | 0.5    | 0.1    | 0.2    | 0.1    | 0.2    | 0.0   | 0.0   | 0.1   | 0.0   | 0.1   | 0.0   |
| B230217C12Rik | 1.1    | 1.0    | 1.2    | 1.1    | 1.2    | 1.1    | 0.9   | 1.0   | 1.0   | 0.6   | 1.0   | 0.8   |
| B230217O12Rik | 1.0    | 0.4    | 0.6    | 0.7    | 0.5    | 0.8    | 0.6   | 1.0   | 0.4   | 0.5   | 0.6   | 0.5   |
| B230219D22Rik | 18.3   | 17.6   | 18.0   | 19.6   | 19.7   | 19.0   | 19.7  | 20.1  | 21.8  | 20.6  | 23.9  | 21.8  |
| B230319C09Rik | 0.2    | 0.4    | 0.2    | 0.2    | 0.3    | 0.3    | 0.2   | 0.3   | 0.2   | 0.2   | 0.3   | 0.3   |
| B230378P21Rik | 0.1    | 0.1    | 0.1    | 0.1    | 0.2    | 0.0    | 0.1   | 0.1   | 0.1   | 0.0   | 0.1   | 0.0   |
| B2m           | 1573.3 | 1115.4 | 1584.3 | 2763.8 | 1377.3 | 1827.6 | 904.5 | 753.2 | 592.7 | 612.2 | 739.9 | 954.2 |
| B330016D10Rik | 0.4    | 0.7    | 0.9    | 0.5    | 0.6    | 0.8    | 0.6   | 0.6   | 0.5   | 0.6   | 0.5   | 0.7   |
| B3galnt1      | 2.8    | 4.1    | 4.3    | 2.9    | 2.7    | 4.1    | 6.3   | 3.5   | 3.9   | 5.1   | 6.4   | 4.7   |
| B3galnt2      | 16.2   | 15.7   | 12.6   | 15.7   | 12.7   | 15.3   | 12.9  | 12.7  | 13.6  | 16.4  | 16.1  | 15.3  |
| B3galt1       | 0.4    | 0.8    | 1.6    | 0.6    | 0.9    | 0.4    | 1.0   | 1.7   | 1.6   | 1.0   | 1.2   | 1.3   |
| B3galt2       | 0.0    | 0.1    | 0.1    | 0.0    | 0.0    | 0.1    | 0.0   | 0.1   | 0.1   | 0.1   | 0.1   | 0.1   |
| B3galt4       | 1.5    | 1.4    | 1.4    | 1.7    | 1.7    | 1.7    | 1.5   | 1.8   | 1.8   | 1.4   | 1.5   | 1.5   |
| B3galt5       | 0.0    | 0.0    | 0.0    | 0.0    | 0.0    | 0.0    | 0.0   | 0.0   | 0.0   | 0.0   | 0.0   | 0.0   |
| B3galt6       | 2.0    | 1.8    | 2.1    | 2.0    | 2.2    | 1.9    | 2.2   | 2.3   | 2.8   | 3.0   | 2.6   | 2.5   |
| B3galtl       | 4.6    | 4.3    | 4.2    | 6.0    | 6.0    | 6.0    | 4.7   | 5.2   | 3.9   | 3.9   | 4.3   | 4.2   |
| B3gat2        | 0.2    | 0.2    | 0.2    | 0.2    | 0.2    | 0.2    | 0.2   | 0.2   | 0.1   | 0.1   | 0.3   | 0.2   |
| B3gat3        | 8.4    | 6.4    | 6.8    | 10.0   | 9.3    | 8.9    | 9.5   | 8.7   | 10.2  | 9.0   | 8.9   | 9.1   |
| B3gnt1        | 17.4   | 15.4   | 14.2   | 18.1   | 15.0   | 20.8   | 17.4  | 14.5  | 16.8  | 16.8  | 16.2  | 15.8  |
| B3gnt2        | 8.1    | 7.9    | 8.1    | 9.9    | 12.2   | 7.9    | 9.0   | 8.8   | 8.2   | 7.5   | 9.2   | 9.2   |
| B3gnt3        | 1.0    | 1.0    | 0.7    | 1.6    | 2.5    | 1.7    | 1.8   | 1.2   | 1.0   | 0.7   | 0.9   | 0.9   |
| B3gnt4        | 0.2    | 0.2    | 0.3    | 0.2    | 0.3    | 0.1    | 0.3   | 0.2   | 0.3   | 0.1   | 0.3   | 0.4   |
| B3gnt5        | 0.0    | 0.0    | 0.0    | 0.0    | 0.0    | 0.0    | 0.1   | 0.0   | 0.1   | 0.0   | 0.0   | 0.0   |

Online Table 1

|               |       |       |       |       |       |       |       |       |      |       |       |       |
|---------------|-------|-------|-------|-------|-------|-------|-------|-------|------|-------|-------|-------|
| B3gnt6        | 0.1   | 0.0   | 0.0   | 0.0   | 0.0   | 0.0   | 0.0   | 0.0   | 0.0  | 0.1   | 0.0   | 0.0   |
| B3gnt7        | 0.0   | 0.0   | 0.0   | 0.0   | 0.1   | 0.0   | 0.0   | 0.0   | 0.0  | 0.0   | 0.0   | 0.0   |
| B3gnt8        | 0.3   | 0.7   | 1.3   | 0.5   | 1.4   | 0.3   | 0.6   | 1.5   | 0.7  | 0.4   | 0.6   | 0.6   |
| B3gnt9        | 10.9  | 10.3  | 12.7  | 8.8   | 10.4  | 11.9  | 13.3  | 17.1  | 15.6 | 16.7  | 14.1  | 18.5  |
| B3gnt11       | 3.1   | 3.2   | 2.5   | 3.0   | 2.7   | 3.4   | 2.5   | 3.0   | 2.8  | 2.6   | 2.9   | 2.3   |
| B430010I23Rik | 0.2   | 0.1   | 0.2   | 0.1   | 0.1   | 0.0   | 0.0   | 0.2   | 0.1  | 0.1   | 0.3   | 0.1   |
| B430212C06Rik | 0.0   | 0.0   | 0.0   | 0.2   | 0.1   | 0.0   | 0.0   | 0.0   | 0.0  | 0.0   | 0.0   | 0.1   |
| B430306N03Rik | 0.3   | 0.0   | 0.0   | 0.9   | 1.0   | 0.0   | 0.1   | 0.0   | 0.0  | 0.1   | 0.1   | 0.1   |
| B430319G15Rik | 1.5   | 1.7   | 1.4   | 1.4   | 1.0   | 0.9   | 1.3   | 1.2   | 1.3  | 1.4   | 1.7   | 1.6   |
| B4galnt1      | 2.4   | 2.4   | 1.7   | 4.1   | 5.3   | 4.7   | 4.7   | 2.6   | 3.3  | 4.8   | 4.5   | 3.6   |
| B4galnt2      | 0.8   | 0.1   | 0.1   | 0.3   | 0.2   | 0.1   | 0.0   | 0.1   | 0.0  | 0.1   | 0.1   | 0.1   |
| B4galnt3      | 0.0   | 0.0   | 0.0   | 0.0   | 0.0   | 0.0   | 0.0   | 0.0   | 0.0  | 0.0   | 0.0   | 0.0   |
| B4galt1       | 35.2  | 45.9  | 48.1  | 22.0  | 36.7  | 25.0  | 41.0  | 55.6  | 52.7 | 40.5  | 38.4  | 53.1  |
| B4galt2       | 12.1  | 11.7  | 10.6  | 13.5  | 11.8  | 15.4  | 14.2  | 13.3  | 12.5 | 11.2  | 11.1  | 10.5  |
| B4galt3       | 4.1   | 4.1   | 5.4   | 3.7   | 5.9   | 4.8   | 5.6   | 4.1   | 5.9  | 6.1   | 4.9   | 5.1   |
| B4galt4       | 23.1  | 17.4  | 17.2  | 16.5  | 12.0  | 17.4  | 16.3  | 16.9  | 13.9 | 30.9  | 27.0  | 21.8  |
| B4galt5       | 15.8  | 12.8  | 15.9  | 15.4  | 25.2  | 11.6  | 24.4  | 20.2  | 16.3 | 14.7  | 14.6  | 18.3  |
| B4galt6       | 3.9   | 3.8   | 3.6   | 4.1   | 4.0   | 3.9   | 4.3   | 3.2   | 3.3  | 3.9   | 4.5   | 3.6   |
| B4galt7       | 15.4  | 13.5  | 9.9   | 18.2  | 18.7  | 15.7  | 20.5  | 14.7  | 15.2 | 13.1  | 16.7  | 12.3  |
| B630005N14Rik | 5.9   | 5.6   | 6.8   | 6.7   | 7.0   | 6.2   | 5.2   | 5.1   | 5.6  | 6.6   | 7.2   | 6.1   |
| B630019K06Rik | 1.7   | 1.6   | 1.5   | 1.9   | 1.3   | 2.2   | 1.7   | 1.3   | 1.4  | 1.4   | 1.5   | 1.7   |
| B930003M22Rik | 0.1   | 0.1   | 0.1   | 0.0   | 0.2   | 0.1   | 0.1   | 0.1   | 0.1  | 0.1   | 0.0   | 0.1   |
| B930041F14Rik | 0.9   | 0.9   | 1.1   | 0.8   | 0.9   | 1.5   | 1.2   | 1.3   | 1.0  | 1.3   | 0.9   | 1.4   |
| B930059L03Rik | 0.4   | 0.4   | 0.6   | 0.6   | 0.5   | 0.5   | 0.4   | 0.7   | 0.2  | 0.4   | 0.2   | 0.5   |
| B9d1          | 8.3   | 8.9   | 8.8   | 7.7   | 7.8   | 10.6  | 5.8   | 9.2   | 7.4  | 5.8   | 9.6   | 9.5   |
| B9d2          | 1.4   | 1.9   | 1.5   | 1.1   | 1.8   | 1.4   | 1.8   | 1.6   | 1.3  | 1.8   | 1.6   | 1.6   |
| Baalc         | 0.4   | 0.1   | 0.1   | 0.3   | 0.2   | 0.1   | 0.1   | 0.0   | 0.1  | 0.4   | 0.1   | 0.3   |
| Baat1         | 0.1   | 0.2   | 0.1   | 0.4   | 0.3   | 0.1   | 0.2   | 0.4   | 0.3  | 0.1   | 0.3   | 0.2   |
| Babam1        | 30.3  | 29.2  | 27.3  | 34.2  | 26.2  | 33.6  | 29.0  | 30.6  | 26.0 | 25.6  | 26.3  | 24.9  |
| Bace1         | 19.1  | 20.8  | 21.3  | 22.9  | 22.2  | 23.2  | 25.9  | 21.6  | 24.8 | 18.0  | 17.8  | 19.5  |
| Bace2         | 2.0   | 2.0   | 2.9   | 2.9   | 2.1   | 2.2   | 1.7   | 2.6   | 1.7  | 1.7   | 1.7   | 1.9   |
| Bach1         | 5.0   | 5.5   | 6.5   | 5.1   | 7.9   | 4.9   | 5.3   | 7.0   | 6.7  | 7.7   | 6.1   | 7.1   |
| Bach2         | 0.0   | 0.0   | 0.0   | 0.0   | 0.0   | 0.0   | 0.0   | 0.0   | 0.0  | 0.2   | 0.1   | 0.0   |
| Bad           | 18.5  | 16.4  | 16.8  | 17.3  | 16.7  | 18.9  | 18.8  | 17.1  | 16.5 | 17.2  | 16.9  | 16.0  |
| Bag1          | 180.1 | 122.7 | 103.0 | 188.1 | 102.8 | 164.8 | 114.3 | 102.7 | 91.3 | 111.2 | 133.5 | 128.7 |
| Bag2          | 15.4  | 16.6  | 15.7  | 17.1  | 17.7  | 16.3  | 23.1  | 23.6  | 22.8 | 18.0  | 25.9  | 18.7  |
| Bag3          | 18.5  | 25.4  | 27.2  | 25.3  | 22.1  | 24.0  | 26.9  | 21.2  | 19.0 | 23.5  | 22.0  | 22.8  |
| Bag4          | 3.4   | 3.6   | 4.2   | 3.9   | 3.7   | 4.2   | 3.4   | 3.6   | 3.6  | 3.9   | 3.9   | 3.9   |
| Bag5          | 15.1  | 13.7  | 14.1  | 14.8  | 12.9  | 15.3  | 12.9  | 14.5  | 13.9 | 12.2  | 15.9  | 16.6  |
| Bag6          | 21.3  | 25.8  | 22.0  | 18.4  | 23.7  | 18.9  | 25.3  | 21.4  | 24.7 | 20.9  | 18.9  | 16.9  |
| Bahcc1        | 0.9   | 1.4   | 1.4   | 0.9   | 1.4   | 1.2   | 1.7   | 1.4   | 1.6  | 1.1   | 1.1   | 0.9   |
| Bahd1         | 3.5   | 4.7   | 3.9   | 3.5   | 3.6   | 3.6   | 3.8   | 3.5   | 4.1  | 3.7   | 3.5   | 3.1   |
| Bai1          | 0.1   | 0.0   | 0.0   | 0.1   | 0.0   | 0.0   | 0.1   | 0.0   | 0.0  | 0.0   | 0.0   | 0.0   |
| Bai2          | 0.3   | 0.3   | 0.2   | 0.2   | 0.2   | 0.3   | 0.2   | 0.2   | 0.3  | 0.6   | 0.4   | 0.3   |
| Bai3          | 0.0   | 0.0   | 0.0   | 0.0   | 0.0   | 0.0   | 0.0   | 0.0   | 0.0  | 0.0   | 0.0   | 0.0   |
| Baiap2        | 5.0   | 6.0   | 7.4   | 5.0   | 6.2   | 5.1   | 8.1   | 6.1   | 6.1  | 6.0   | 5.1   | 6.0   |
| Baiap211      | 0.8   | 0.9   | 1.3   | 0.7   | 0.5   | 0.5   | 1.3   | 1.0   | 1.3  | 2.4   | 1.7   | 1.5   |
| Baiap212      | 0.1   | 0.0   | 0.1   | 0.1   | 0.0   | 0.1   | 0.1   | 0.1   | 0.0  | 0.0   | 0.0   | 0.1   |
| Baiap3        | 0.1   | 0.1   | 0.2   | 0.3   | 0.1   | 0.2   | 0.1   | 0.1   | 0.1  | 0.1   | 0.1   | 0.2   |
| Bak1          | 17.7  | 20.7  | 20.4  | 22.0  | 22.6  | 17.2  | 19.7  | 24.1  | 19.6 | 16.6  | 21.1  | 18.1  |
| Bambi         | 0.4   | 0.5   | 0.6   | 0.3   | 0.6   | 0.3   | 0.9   | 0.9   | 0.8  | 0.9   | 0.9   | 0.5   |
| Bambi-ps1     | 0.3   | 0.3   | 0.2   | 0.1   | 0.6   | 0.5   | 0.2   | 0.1   | 0.1  | 0.1   | 0.4   | 0.1   |
| Banf1         | 37.7  | 34.2  | 31.2  | 51.0  | 41.9  | 44.0  | 38.3  | 41.7  | 35.7 | 40.9  | 38.6  | 37.0  |
| Bank1         | 0.1   | 0.0   | 0.0   | 0.1   | 0.0   | 0.0   | 0.0   | 0.1   | 0.0  | 0.1   | 0.0   | 0.1   |
| Banp          | 4.5   | 5.3   | 4.7   | 4.5   | 4.9   | 5.8   | 3.7   | 3.7   | 4.6  | 5.2   | 5.4   | 4.5   |
| Bap1          | 10.8  | 12.2  | 13.0  | 11.1  | 12.3  | 12.5  | 10.6  | 12.9  | 12.2 | 11.1  | 9.7   | 10.3  |
| Bard1         | 0.4   | 0.8   | 1.1   | 0.2   | 0.8   | 0.2   | 1.1   | 0.4   | 0.8  | 0.4   | 0.5   | 0.4   |

Online Table 1

|          |      |      |      |       |       |      |       |      |      |      |       |      |
|----------|------|------|------|-------|-------|------|-------|------|------|------|-------|------|
| Barhl1   | 0.0  | 0.0  | 0.0  | 0.0   | 0.0   | 0.0  | 0.0   | 0.0  | 0.0  | 0.0  | 0.0   | 0.0  |
| Barx1    | 0.2  | 0.1  | 0.0  | 0.2   | 0.0   | 0.1  | 0.1   | 0.0  | 0.0  | 0.1  | 0.0   | 0.0  |
| Barx2    | 0.0  | 0.0  | 0.0  | 0.1   | 0.1   | 0.0  | 0.0   | 0.0  | 0.0  | 0.0  | 0.0   | 0.0  |
| Basp1    | 83.5 | 56.7 | 49.9 | 107.6 | 88.9  | 61.3 | 120.8 | 75.8 | 81.8 | 97.6 | 115.9 | 86.7 |
| Batf     | 0.5  | 0.4  | 0.8  | 0.8   | 1.3   | 0.8  | 0.2   | 0.2  | 0.0  | 0.4  | 0.1   | 0.3  |
| Batf2    | 0.1  | 0.1  | 0.0  | 0.1   | 0.3   | 0.1  | 0.1   | 0.0  | 0.0  | 0.0  | 0.0   | 0.1  |
| Batf3    | 0.0  | 0.0  | 0.0  | 0.1   | 0.2   | 0.0  | 0.1   | 0.1  | 0.1  | 0.0  | 0.0   | 0.0  |
| Bax      | 91.8 | 83.1 | 72.3 | 96.8  | 100.7 | 89.2 | 89.7  | 82.8 | 88.0 | 95.8 | 85.2  | 77.7 |
| Baz1a    | 7.3  | 8.3  | 9.8  | 7.6   | 9.1   | 5.9  | 9.0   | 8.5  | 8.4  | 8.4  | 9.2   | 9.6  |
| Baz1b    | 24.5 | 26.6 | 29.2 | 25.8  | 25.0  | 23.9 | 29.1  | 26.1 | 25.6 | 27.0 | 29.6  | 31.1 |
| Baz2a    | 3.2  | 4.6  | 4.3  | 3.8   | 3.9   | 3.3  | 4.5   | 4.2  | 4.3  | 3.6  | 4.4   | 3.7  |
| Baz2b    | 4.2  | 4.2  | 4.4  | 4.7   | 3.9   | 3.5  | 3.7   | 3.7  | 3.7  | 4.7  | 4.5   | 4.5  |
| BB287469 | 0.1  | 0.0  | 0.1  | 0.1   | 0.1   | 0.0  | 0.1   | 0.1  | 0.0  | 0.1  | 0.1   | 0.1  |
| Bbc3     | 4.3  | 4.3  | 4.0  | 4.1   | 4.3   | 4.6  | 4.2   | 4.6  | 5.3  | 5.7  | 4.3   | 4.1  |
| Bbip1    | 7.3  | 6.0  | 5.6  | 6.8   | 6.2   | 6.0  | 5.6   | 6.8  | 6.4  | 6.6  | 8.0   | 7.4  |
| Bbox1    | 0.2  | 0.1  | 0.2  | 0.1   | 0.0   | 0.0  | 0.0   | 0.1  | 0.1  | 0.0  | 0.1   | 0.0  |
| Bbs1     | 0.8  | 0.9  | 1.1  | 0.6   | 0.8   | 1.0  | 0.6   | 1.0  | 0.7  | 0.6  | 0.6   | 0.7  |
| Bbs10    | 1.4  | 1.7  | 1.4  | 1.5   | 1.3   | 1.2  | 1.0   | 1.7  | 1.6  | 1.3  | 1.4   | 1.8  |
| Bbs12    | 1.3  | 1.4  | 1.0  | 0.6   | 1.2   | 1.3  | 0.9   | 1.0  | 1.3  | 1.7  | 1.6   | 1.3  |
| Bbs2     | 3.7  | 3.6  | 3.4  | 3.3   | 2.9   | 5.5  | 2.8   | 3.5  | 2.6  | 3.1  | 2.5   | 2.9  |
| Bbs4     | 4.1  | 2.5  | 2.1  | 5.7   | 3.1   | 4.5  | 2.8   | 2.3  | 2.2  | 2.4  | 3.1   | 3.0  |
| Bbs5     | 8.0  | 7.0  | 6.2  | 7.6   | 6.0   | 9.2  | 4.9   | 5.2  | 5.6  | 8.0  | 7.8   | 7.2  |
| Bbs7     | 8.2  | 7.7  | 8.7  | 7.3   | 6.8   | 7.6  | 7.1   | 7.0  | 6.3  | 5.4  | 7.0   | 8.6  |
| Bbs9     | 2.6  | 2.6  | 2.7  | 2.1   | 1.9   | 2.9  | 1.9   | 1.6  | 1.8  | 1.8  | 1.8   | 2.2  |
| Bbx      | 10.1 | 10.1 | 10.7 | 12.2  | 9.2   | 12.6 | 8.6   | 9.6  | 8.0  | 11.2 | 11.5  | 10.1 |
| BC002163 | 3.5  | 3.8  | 7.4  | 4.0   | 3.2   | 2.7  | 2.5   | 2.3  | 2.9  | 2.5  | 2.9   | 5.5  |
| BC003331 | 31.8 | 28.4 | 26.2 | 37.4  | 27.0  | 31.8 | 23.5  | 22.6 | 25.2 | 27.5 | 31.6  | 31.2 |
| BC003965 | 4.8  | 4.7  | 3.4  | 5.3   | 4.6   | 4.7  | 3.4   | 3.7  | 4.0  | 4.8  | 4.1   | 3.7  |
| BC004004 | 24.8 | 18.5 | 17.4 | 28.1  | 20.2  | 22.4 | 22.6  | 18.8 | 18.6 | 22.8 | 22.4  | 22.4 |
| BC005537 | 24.3 | 25.7 | 23.0 | 28.1  | 32.0  | 24.1 | 23.4  | 26.3 | 27.4 | 18.7 | 22.1  | 19.9 |
| BC005561 | 1.1  | 1.8  | 2.3  | 1.3   | 1.5   | 1.6  | 1.8   | 1.9  | 1.3  | 1.6  | 1.9   | 1.8  |
| BC005624 | 39.2 | 33.3 | 41.7 | 56.9  | 33.8  | 44.2 | 36.2  | 37.3 | 25.7 | 31.6 | 38.3  | 43.2 |
| BC005764 | 0.9  | 1.1  | 1.0  | 0.6   | 1.2   | 0.7  | 0.9   | 1.1  | 1.2  | 1.2  | 0.7   | 0.9  |
| BC006965 | 0.1  | 0.1  | 0.1  | 0.1   | 0.1   | 0.0  | 0.0   | 0.0  | 0.0  | 0.0  | 0.0   | 0.1  |
| BC016423 | 5.4  | 5.8  | 4.9  | 5.3   | 5.7   | 5.2  | 5.5   | 5.9  | 5.3  | 5.5  | 6.3   | 5.7  |
| BC016579 | 0.0  | 0.1  | 0.0  | 0.2   | 0.0   | 0.0  | 0.1   | 0.0  | 0.0  | 0.1  | 0.1   | 0.0  |
| BC017158 | 6.0  | 5.7  | 5.8  | 6.8   | 5.5   | 7.3  | 6.3   | 6.8  | 5.8  | 4.8  | 5.2   | 5.8  |
| BC017612 | 7.7  | 6.1  | 4.8  | 6.5   | 4.9   | 7.0  | 5.7   | 4.5  | 6.8  | 5.9  | 7.0   | 6.4  |
| BC017643 | 13.3 | 12.5 | 12.4 | 14.1  | 15.0  | 13.5 | 14.1  | 13.4 | 14.1 | 13.6 | 13.5  | 13.4 |
| BC018242 | 2.0  | 2.9  | 2.5  | 2.1   | 2.1   | 2.5  | 2.2   | 2.2  | 2.1  | 1.5  | 1.8   | 1.5  |
| BC018473 | 0.1  | 0.1  | 0.0  | 0.0   | 0.1   | 0.1  | 0.0   | 0.0  | 0.0  | 0.1  | 0.0   | 0.0  |
| BC018507 | 7.8  | 9.1  | 8.6  | 7.9   | 8.9   | 8.5  | 8.7   | 9.5  | 9.5  | 8.4  | 9.2   | 8.5  |
| BC020402 | 0.9  | 0.8  | 0.7  | 0.5   | 0.8   | 0.9  | 1.3   | 1.2  | 0.8  | 0.9  | 0.8   | 1.0  |
| BC021767 | 0.6  | 0.4  | 0.4  | 0.6   | 0.3   | 0.4  | 0.3   | 0.3  | 0.3  | 0.6  | 0.5   | 0.3  |
| BC021785 | 0.2  | 0.2  | 0.3  | 0.3   | 0.4   | 0.6  | 0.2   | 0.4  | 0.2  | 0.2  | 0.2   | 0.3  |
| BC021891 | 0.1  | 0.1  | 0.1  | 0.1   | 0.1   | 0.0  | 0.1   | 0.1  | 0.1  | 0.0  | 0.1   | 0.1  |
| BC022687 | 11.8 | 8.2  | 5.6  | 8.4   | 6.7   | 11.3 | 6.5   | 6.7  | 6.1  | 10.8 | 7.6   | 8.8  |
| BC023829 | 10.6 | 12.6 | 11.7 | 12.4  | 11.8  | 12.1 | 11.8  | 11.5 | 10.9 | 12.3 | 12.1  | 13.7 |
| BC024139 | 0.0  | 0.0  | 0.0  | 0.0   | 0.0   | 0.0  | 0.0   | 0.0  | 0.0  | 0.0  | 0.0   | 0.0  |
| BC024582 | 0.0  | 0.1  | 0.0  | 0.0   | 0.1   | 0.0  | 0.0   | 0.0  | 0.0  | 0.1  | 0.0   | 0.0  |
| BC024978 | 0.8  | 0.6  | 1.0  | 0.9   | 0.8   | 0.9  | 1.0   | 0.7  | 1.0  | 0.9  | 0.9   | 0.6  |
| BC025920 | 0.4  | 0.3  | 0.5  | 0.2   | 0.3   | 0.5  | 0.1   | 0.2  | 0.2  | 0.2  | 0.1   | 0.2  |
| BC026585 | 9.1  | 8.4  | 7.2  | 9.0   | 5.7   | 10.7 | 5.9   | 5.8  | 4.4  | 3.7  | 7.1   | 6.6  |
| BC026590 | 3.3  | 3.3  | 3.1  | 3.7   | 3.3   | 3.7  | 2.8   | 3.5  | 2.7  | 3.2  | 4.1   | 2.8  |
| BC027231 | 4.4  | 5.0  | 4.8  | 4.5   | 4.5   | 4.2  | 5.3   | 4.7  | 4.6  | 4.7  | 5.5   | 5.6  |
| BC028528 | 9.5  | 14.1 | 19.1 | 24.0  | 25.0  | 17.1 | 18.4  | 12.0 | 16.8 | 15.5 | 17.3  | 18.7 |
| BC029214 | 7.1  | 5.7  | 5.5  | 6.6   | 4.2   | 7.0  | 6.1   | 8.3  | 7.6  | 5.4  | 6.0   | 6.0  |

Online Table 1

|          |       |       |       |       |       |       |       |       |       |       |       |       |
|----------|-------|-------|-------|-------|-------|-------|-------|-------|-------|-------|-------|-------|
| BC029722 | 28.3  | 19.5  | 18.4  | 27.1  | 24.8  | 25.4  | 22.8  | 20.3  | 20.5  | 31.0  | 28.5  | 26.5  |
| BC030307 | 0.6   | 0.5   | 0.3   | 0.3   | 0.5   | 0.4   | 0.5   | 0.5   | 0.4   | 0.5   | 0.4   | 0.4   |
| BC030336 | 3.9   | 4.3   | 5.0   | 4.5   | 4.2   | 4.7   | 3.7   | 4.0   | 4.5   | 4.7   | 4.9   | 5.2   |
| BC030476 | 0.0   | 0.1   | 0.0   | 0.0   | 0.0   | 0.0   | 0.0   | 0.0   | 0.0   | 0.0   | 0.0   | 0.0   |
| BC030867 | 0.2   | 0.8   | 0.5   | 0.0   | 0.8   | 0.1   | 0.8   | 0.4   | 0.7   | 0.4   | 0.4   | 0.2   |
| BC031181 | 100.6 | 82.5  | 72.4  | 114.8 | 83.6  | 94.5  | 85.4  | 76.7  | 74.2  | 89.9  | 93.0  | 95.7  |
| BC031361 | 0.5   | 0.4   | 0.3   | 0.4   | 0.4   | 0.5   | 0.3   | 0.5   | 0.4   | 0.7   | 0.5   | 0.5   |
| BC033916 | 0.1   | 0.1   | 0.1   | 0.0   | 0.0   | 0.0   | 0.0   | 0.0   | 0.0   | 0.0   | 0.0   | 0.1   |
| BC035044 | 0.0   | 0.0   | 0.0   | 0.1   | 0.1   | 0.0   | 0.0   | 0.0   | 0.0   | 0.0   | 0.0   | 0.0   |
| BC037032 | 0.1   | 0.1   | 0.1   | 0.1   | 0.0   | 0.1   | 0.1   | 0.1   | 0.1   | 0.2   | 0.0   | 0.2   |
| BC037034 | 3.5   | 3.2   | 2.6   | 4.5   | 4.7   | 2.9   | 3.9   | 2.8   | 3.8   | 5.4   | 2.7   | 2.9   |
| BC037704 | 0.1   | 0.0   | 0.2   | 0.1   | 0.2   | 0.0   | 0.0   | 0.1   | 0.2   | 0.3   | 0.2   | 0.3   |
| BC039771 | 0.1   | 0.3   | 0.5   | 0.1   | 0.1   | 0.1   | 0.1   | 0.1   | 0.2   | 0.1   | 0.2   | 0.2   |
| BC048403 | 1.3   | 1.7   | 1.1   | 1.4   | 1.5   | 1.2   | 1.6   | 1.6   | 1.3   | 1.1   | 1.6   | 1.2   |
| BC048644 | 0.0   | 0.0   | 0.0   | 0.0   | 0.0   | 0.0   | 0.0   | 0.1   | 0.0   | 0.0   | 0.0   | 0.0   |
| BC049715 | 0.4   | 0.1   | 0.1   | 0.3   | 0.5   | 0.2   | 0.0   | 0.0   | 0.0   | 0.2   | 0.0   | 0.0   |
| BC049762 | 0.6   | 0.1   | 0.4   | 0.1   | 0.5   | 0.3   | 0.3   | 0.4   | 0.2   | 0.5   | 0.3   | 0.5   |
| BC051019 | 0.0   | 0.1   | 0.1   | 0.0   | 0.1   | 0.0   | 0.0   | 0.1   | 0.1   | 0.0   | 0.1   | 0.0   |
| BC051142 | 0.6   | 0.5   | 0.5   | 0.8   | 0.4   | 0.6   | 0.3   | 0.5   | 0.2   | 0.7   | 1.0   | 0.5   |
| BC051226 | 2.5   | 2.9   | 2.9   | 2.3   | 1.7   | 4.2   | 2.2   | 2.3   | 2.6   | 1.7   | 3.1   | 1.3   |
| BC051628 | 0.0   | 0.1   | 0.0   | 0.0   | 0.0   | 0.1   | 0.1   | 0.0   | 0.0   | 0.0   | 0.0   | 0.0   |
| BC052040 | 0.5   | 0.7   | 0.8   | 0.4   | 0.6   | 0.7   | 0.8   | 0.9   | 0.8   | 0.5   | 0.6   | 0.7   |
| BC052688 | 0.3   | 0.6   | 0.8   | 0.3   | 0.5   | 0.1   | 0.1   | 0.6   | 0.6   | 0.4   | 0.3   | 0.2   |
| BC053749 | 0.2   | 0.5   | 0.6   | 0.3   | 0.3   | 0.2   | 0.3   | 0.3   | 0.4   | 0.2   | 0.2   | 0.2   |
| BC055111 | 0.0   | 0.0   | 0.0   | 0.1   | 0.0   | 0.0   | 0.0   | 0.0   | 0.1   | 0.0   | 0.1   | 0.0   |
| BC055324 | 1.1   | 1.7   | 2.0   | 0.7   | 1.6   | 1.0   | 1.7   | 1.6   | 1.8   | 1.5   | 1.6   | 1.1   |
| BC056474 | 37.7  | 30.2  | 23.7  | 43.9  | 29.1  | 36.8  | 31.3  | 30.7  | 26.1  | 27.3  | 29.1  | 27.0  |
| BC061194 | 0.1   | 0.0   | 0.1   | 0.0   | 0.0   | 0.2   | 0.0   | 0.0   | 0.1   | 0.0   | 0.0   | 0.0   |
| BC064078 | 0.0   | 0.1   | 0.0   | 0.3   | 0.1   | 0.2   | 0.1   | 0.1   | 0.0   | 0.0   | 0.0   | 0.1   |
| BC065397 | 0.2   | 0.2   | 0.3   | 0.2   | 0.3   | 0.1   | 0.2   | 0.3   | 0.3   | 0.1   | 0.2   | 0.2   |
| BC068157 | 0.1   | 0.1   | 0.1   | 0.1   | 0.1   | 0.1   | 0.1   | 0.1   | 0.2   | 0.1   | 0.1   | 0.1   |
| BC068281 | 2.3   | 2.3   | 2.6   | 1.8   | 1.9   | 2.1   | 2.4   | 2.5   | 1.9   | 2.2   | 2.1   | 2.5   |
| BC090627 | 0.4   | 0.0   | 0.0   | 0.0   | 0.2   | 0.2   | 0.1   | 0.2   | 0.1   | 0.2   | 0.0   | 0.2   |
| BC096441 | 1.9   | 1.1   | 1.1   | 1.8   | 2.9   | 1.0   | 1.2   | 1.5   | 1.7   | 1.8   | 1.3   | 2.2   |
| Bc1      | 2.3   | 0.0   | 1.2   | 0.0   | 1.3   | 0.1   | 0.8   | 0.6   | 1.8   | 1.2   | 0.4   | 0.0   |
| BC100451 | 2.5   | 1.8   | 1.6   | 2.6   | 1.8   | 2.2   | 2.4   | 1.9   | 1.5   | 2.7   | 2.7   | 2.6   |
| BC125332 | 0.0   | 0.0   | 0.0   | 0.0   | 0.0   | 0.0   | 0.0   | 0.0   | 0.0   | 0.0   | 0.0   | 0.0   |
| Bcam     | 8.0   | 8.9   | 8.0   | 10.4  | 9.4   | 12.5  | 10.2  | 5.2   | 9.1   | 9.7   | 8.9   | 8.7   |
| Bcan     | 0.1   | 0.1   | 0.0   | 0.3   | 0.1   | 0.1   | 0.0   | 0.0   | 0.0   | 0.1   | 0.0   | 0.0   |
| Bcap29   | 10.1  | 11.1  | 11.1  | 13.2  | 12.0  | 13.5  | 10.0  | 8.6   | 8.5   | 9.4   | 13.4  | 11.4  |
| Bcap31   | 155.5 | 137.2 | 123.1 | 166.3 | 141.5 | 167.8 | 143.4 | 138.0 | 131.1 | 148.1 | 166.3 | 155.5 |
| Bcar1    | 11.7  | 13.1  | 11.6  | 11.6  | 13.3  | 11.3  | 16.0  | 13.6  | 15.5  | 14.6  | 15.1  | 13.5  |
| Bcar3    | 0.4   | 0.1   | 0.2   | 0.4   | 1.0   | 0.2   | 0.4   | 0.4   | 0.5   | 1.5   | 1.0   | 0.7   |
| Bcas1    | 0.0   | 0.1   | 0.0   | 0.1   | 0.0   | 0.0   | 0.0   | 0.1   | 0.0   | 0.0   | 0.0   | 0.0   |
| Bcas2    | 22.6  | 19.0  | 21.0  | 25.3  | 19.0  | 23.2  | 18.4  | 21.1  | 17.1  | 19.9  | 18.2  | 19.3  |
| Bcas3    | 8.6   | 7.9   | 7.4   | 8.8   | 7.3   | 9.6   | 7.5   | 8.4   | 6.8   | 7.5   | 7.3   | 7.3   |
| Bcat1    | 3.1   | 2.3   | 2.6   | 3.7   | 3.1   | 3.5   | 7.2   | 10.5  | 7.3   | 4.1   | 7.4   | 4.2   |
| Bcat2    | 7.2   | 7.3   | 7.0   | 7.5   | 8.7   | 9.6   | 6.6   | 7.5   | 7.8   | 7.4   | 6.2   | 6.4   |
| Bccip    | 32.6  | 22.3  | 24.9  | 37.9  | 28.5  | 31.9  | 22.9  | 24.4  | 20.9  | 24.5  | 26.9  | 27.5  |
| Bcdin3d  | 1.8   | 1.8   | 2.0   | 2.7   | 1.5   | 1.7   | 2.0   | 1.9   | 1.6   | 1.9   | 1.8   | 2.2   |
| Bche     | 0.1   | 0.0   | 0.0   | 0.1   | 0.0   | 0.1   | 0.1   | 0.1   | 0.1   | 0.4   | 0.2   | 0.2   |
| Bckdha   | 17.9  | 17.0  | 15.0  | 19.2  | 15.4  | 19.6  | 15.5  | 18.5  | 16.5  | 22.6  | 16.9  | 19.3  |
| Bckdha   | 3.9   | 4.6   | 5.1   | 3.6   | 3.8   | 4.6   | 4.3   | 4.5   | 4.0   | 4.8   | 4.0   | 4.3   |
| Bckdk    | 12.3  | 12.7  | 13.4  | 12.2  | 10.4  | 12.6  | 12.0  | 13.0  | 12.0  | 11.2  | 11.7  | 11.5  |
| Bcl10    | 28.1  | 23.2  | 25.6  | 22.7  | 26.2  | 18.4  | 27.8  | 24.9  | 26.1  | 33.0  | 30.3  | 28.5  |
| Bcl11b   | 0.0   | 0.0   | 0.0   | 0.0   | 0.0   | 0.0   | 0.0   | 0.0   | 0.0   | 0.0   | 0.0   | 0.0   |
| Bcl2     | 2.3   | 2.3   | 2.3   | 3.8   | 4.2   | 3.4   | 1.5   | 1.3   | 1.7   | 2.4   | 1.5   | 1.5   |

Online Table 1

|         |       |       |        |        |        |        |        |       |       |       |       |       |
|---------|-------|-------|--------|--------|--------|--------|--------|-------|-------|-------|-------|-------|
| Bcl2a1a | 0.5   | 0.0   | 0.0    | 2.4    | 4.5    | 0.0    | 1.0    | 0.1   | 0.3   | 0.2   | 0.3   | 0.4   |
| Bcl2a1b | 1.8   | 0.1   | 0.1    | 7.9    | 15.0   | 0.2    | 1.8    | 0.2   | 0.3   | 0.8   | 0.4   | 1.5   |
| Bcl2a1d | 0.8   | 0.1   | 0.0    | 2.9    | 8.0    | 0.1    | 1.6    | 0.2   | 0.4   | 0.5   | 0.4   | 0.6   |
| Bcl2l1  | 38.4  | 41.7  | 32.9   | 42.8   | 44.4   | 41.3   | 38.4   | 30.0  | 35.3  | 39.6  | 38.8  | 33.8  |
| Bcl2l10 | 0.0   | 0.1   | 0.0    | 0.0    | 0.0    | 0.1    | 0.0    | 0.0   | 0.0   | 0.0   | 0.0   | 0.0   |
| Bcl2l11 | 0.7   | 1.1   | 1.7    | 0.7    | 1.8    | 0.9    | 1.1    | 1.4   | 1.5   | 1.9   | 1.1   | 1.3   |
| Bcl2l12 | 3.7   | 3.6   | 3.9    | 3.2    | 3.8    | 3.5    | 4.5    | 4.2   | 4.4   | 3.7   | 3.4   | 2.7   |
| Bcl2l13 | 4.1   | 3.9   | 3.6    | 3.7    | 3.5    | 3.5    | 3.5    | 3.5   | 3.2   | 3.4   | 3.3   | 3.0   |
| Bcl2l14 | 0.0   | 0.0   | 0.1    | 0.0    | 0.1    | 0.0    | 0.0    | 0.0   | 0.0   | 0.1   | 0.0   | 0.1   |
| Bcl2l15 | 0.2   | 0.0   | 0.4    | 0.2    | 0.0    | 0.1    | 0.1    | 0.1   | 0.1   | 0.1   | 0.1   | 0.1   |
| Bcl2l2  | 32.1  | 29.1  | 24.6   | 40.0   | 30.5   | 35.0   | 29.2   | 21.2  | 29.2  | 27.6  | 30.5  | 28.0  |
| Bcl3    | 2.5   | 3.4   | 4.8    | 1.8    | 5.2    | 1.6    | 4.0    | 6.5   | 4.7   | 3.8   | 3.5   | 3.4   |
| Bcl6    | 6.3   | 7.1   | 8.7    | 9.0    | 8.9    | 8.5    | 6.8    | 6.9   | 6.1   | 6.1   | 5.9   | 5.6   |
| Bcl6b   | 0.5   | 0.2   | 0.3    | 0.1    | 0.2    | 0.0    | 0.3    | 0.7   | 0.3   | 0.1   | 0.1   | 0.1   |
| Bcl7a   | 0.7   | 0.8   | 0.9    | 1.1    | 0.6    | 1.2    | 0.8    | 0.8   | 0.7   | 0.9   | 1.0   | 0.9   |
| Bcl7b   | 16.3  | 11.9  | 11.2   | 18.7   | 12.2   | 14.9   | 15.7   | 12.1  | 11.8  | 12.3  | 14.2  | 13.3  |
| Bcl7c   | 8.8   | 6.9   | 8.2    | 8.4    | 6.6    | 6.7    | 7.7    | 7.6   | 8.5   | 8.9   | 7.3   | 8.3   |
| Bcl9    | 0.7   | 0.9   | 1.0    | 0.7    | 0.7    | 0.8    | 0.7    | 1.0   | 0.8   | 0.8   | 0.6   | 0.7   |
| Bcl9l   | 2.5   | 4.7   | 4.5    | 2.9    | 3.2    | 2.9    | 4.3    | 4.5   | 4.3   | 3.1   | 2.7   | 2.8   |
| Bclaf1  | 20.0  | 17.6  | 23.9   | 22.4   | 19.6   | 16.7   | 26.5   | 25.0  | 21.1  | 22.7  | 28.0  | 27.8  |
| Bcmo1   | 0.3   | 0.2   | 0.1    | 0.2    | 0.1    | 0.3    | 0.2    | 0.2   | 0.1   | 0.1   | 0.1   | 0.1   |
| Bco2    | 0.3   | 0.2   | 0.1    | 0.4    | 0.3    | 0.4    | 0.3    | 0.1   | 0.1   | 0.2   | 0.1   | 0.1   |
| Bcor    | 4.2   | 4.6   | 4.9    | 3.7    | 4.2    | 3.8    | 5.1    | 4.1   | 4.3   | 3.7   | 4.0   | 4.0   |
| Bcorl1  | 0.7   | 1.0   | 1.1    | 0.7    | 0.8    | 0.7    | 1.2    | 1.0   | 1.0   | 0.7   | 1.0   | 0.7   |
| Bcr     | 9.7   | 11.0  | 11.8   | 7.1    | 8.1    | 9.1    | 10.0   | 10.7  | 8.5   | 10.4  | 9.4   | 9.0   |
| Bcs1l   | 6.6   | 6.9   | 7.0    | 6.1    | 4.9    | 6.1    | 5.9    | 6.8   | 6.0   | 7.0   | 7.2   | 6.8   |
| Bdh1    | 0.5   | 0.5   | 0.5    | 0.6    | 0.8    | 0.4    | 0.8    | 1.3   | 1.1   | 0.6   | 1.1   | 0.5   |
| Bdh2    | 7.4   | 6.4   | 5.7    | 4.6    | 3.3    | 7.7    | 2.3    | 6.4   | 3.4   | 3.1   | 3.3   | 3.3   |
| Bdkrb1  | 0.2   | 0.2   | 0.2    | 0.0    | 0.1    | 0.0    | 0.2    | 0.1   | 0.1   | 0.2   | 0.2   | 0.2   |
| Bdnf    | 31.0  | 25.7  | 22.4   | 35.1   | 25.8   | 26.4   | 30.6   | 16.5  | 24.2  | 17.7  | 26.2  | 27.8  |
| Bdp1    | 6.6   | 7.1   | 7.6    | 6.9    | 6.7    | 5.7    | 6.6    | 5.5   | 5.8   | 6.1   | 7.4   | 7.3   |
| Bean1   | 1.0   | 1.0   | 0.9    | 1.8    | 0.7    | 2.0    | 0.6    | 0.6   | 0.6   | 0.4   | 0.5   | 0.5   |
| Becn1   | 88.6  | 68.6  | 61.6   | 111.6  | 72.3   | 94.2   | 73.4   | 57.0  | 59.6  | 63.4  | 70.9  | 74.9  |
| Begain  | 0.4   | 0.3   | 0.3    | 0.2    | 0.3    | 0.3    | 0.2    | 0.2   | 0.3   | 0.2   | 0.2   | 0.3   |
| Bend3   | 1.0   | 1.3   | 1.1    | 1.3    | 1.1    | 1.1    | 1.7    | 1.6   | 1.5   | 1.1   | 1.3   | 1.2   |
| Bend4   | 1.1   | 1.1   | 0.6    | 1.0    | 1.0    | 1.0    | 0.8    | 0.4   | 0.7   | 1.2   | 1.1   | 0.8   |
| Bend6   | 3.5   | 3.4   | 2.7    | 4.8    | 3.3    | 4.5    | 3.0    | 3.3   | 2.1   | 2.1   | 2.7   | 1.9   |
| Bend7   | 0.2   | 0.1   | 0.0    | 0.1    | 0.1    | 0.2    | 0.1    | 0.0   | 0.0   | 0.2   | 0.0   | 0.1   |
| Best1   | 0.4   | 0.6   | 0.8    | 0.3    | 0.9    | 0.5    | 0.5    | 0.4   | 0.2   | 0.5   | 0.4   | 0.4   |
| Best3   | 0.4   | 0.2   | 0.1    | 0.2    | 0.1    | 0.3    | 0.2    | 0.1   | 0.0   | 0.2   | 0.0   | 0.1   |
| Bet1    | 16.1  | 18.4  | 19.5   | 20.3   | 18.5   | 21.7   | 14.8   | 18.4  | 18.3  | 19.2  | 21.9  | 19.9  |
| Bet1l   | 30.8  | 25.0  | 20.1   | 24.4   | 24.4   | 23.6   | 23.2   | 22.1  | 25.6  | 26.3  | 24.6  | 25.2  |
| Bet3l   | 0.0   | 0.0   | 0.0    | 0.0    | 0.0    | 0.0    | 0.0    | 0.1   | 0.0   | 0.0   | 0.2   | 0.0   |
| Bex1    | 0.1   | 0.0   | 0.0    | 0.1    | 0.0    | 0.1    | 0.0    | 0.0   | 0.0   | 0.1   | 0.0   | 0.0   |
| Bex2    | 0.5   | 0.7   | 0.7    | 0.3    | 0.4    | 0.5    | 0.6    | 0.5   | 0.6   | 0.7   | 0.6   | 0.3   |
| Bex4    | 0.1   | 0.2   | 0.0    | 0.5    | 0.3    | 0.3    | 0.0    | 0.1   | 0.1   | 0.3   | 0.3   | 0.3   |
| Bfar    | 19.2  | 17.8  | 19.9   | 19.1   | 18.4   | 16.6   | 20.0   | 20.6  | 19.3  | 19.7  | 20.4  | 22.0  |
| Bfsp1   | 0.5   | 0.3   | 0.4    | 0.3    | 0.3    | 0.3    | 0.4    | 0.4   | 0.2   | 0.3   | 0.5   | 0.6   |
| Bfsp2   | 0.1   | 0.1   | 0.0    | 0.0    | 0.0    | 0.0    | 0.0    | 0.0   | 0.0   | 0.1   | 0.0   | 0.1   |
| Bglap   | 0.2   | 0.3   | 0.4    | 0.8    | 0.3    | 0.2    | 0.1    | 0.1   | 0.0   | 0.4   | 0.0   | 0.2   |
| Bglap2  | 0.2   | 0.5   | 0.3    | 0.4    | 0.5    | 0.2    | 0.1    | 0.1   | 0.0   | 0.3   | 0.0   | 0.1   |
| Bgn     | 858.2 | 950.3 | 1109.6 | 1106.3 | 1092.3 | 1188.2 | 1202.8 | 985.2 | 852.7 | 728.8 | 782.9 | 773.0 |
| Bhlha15 | 0.0   | 0.0   | 0.1    | 0.1    | 0.0    | 0.1    | 0.0    | 0.0   | 0.0   | 0.0   | 0.1   | 0.0   |
| Bhlhb9  | 7.9   | 10.8  | 11.5   | 7.1    | 7.7    | 10.8   | 7.8    | 9.9   | 9.4   | 11.0  | 9.4   | 9.1   |
| Bhlhe22 | 0.0   | 0.0   | 0.1    | 0.0    | 0.0    | 0.0    | 0.1    | 0.0   | 0.1   | 0.2   | 0.0   | 0.2   |
| Bhlhe40 | 16.1  | 20.1  | 20.5   | 12.2   | 21.1   | 16.9   | 18.9   | 18.6  | 17.2  | 15.7  | 16.7  | 17.4  |
| Bhlhe41 | 1.9   | 1.8   | 1.8    | 2.8    | 2.0    | 2.4    | 1.0    | 1.5   | 0.9   | 1.8   | 1.3   | 1.3   |

Online Table 1

|          |      |      |       |       |      |       |      |       |      |      |      |      |
|----------|------|------|-------|-------|------|-------|------|-------|------|------|------|------|
| Bicc1    | 51.3 | 83.7 | 126.7 | 43.7  | 59.6 | 39.5  | 73.2 | 115.0 | 75.8 | 63.1 | 67.2 | 95.8 |
| Bicd1    | 1.9  | 1.6  | 1.2   | 1.7   | 1.2  | 2.3   | 1.4  | 1.5   | 1.2  | 1.9  | 2.2  | 1.5  |
| Bicd2    | 48.3 | 52.4 | 43.8  | 55.1  | 41.9 | 58.3  | 55.5 | 53.4  | 48.8 | 33.5 | 51.4 | 39.7 |
| Bid      | 24.7 | 17.4 | 13.2  | 36.8  | 27.1 | 26.4  | 25.8 | 19.2  | 18.4 | 20.3 | 25.9 | 21.1 |
| Bik      | 0.1  | 0.0  | 0.1   | 0.2   | 0.5  | 0.0   | 0.3  | 0.1   | 0.1  | 0.0  | 0.0  | 0.1  |
| Bin1     | 29.2 | 33.0 | 31.3  | 35.3  | 30.2 | 32.9  | 27.4 | 34.2  | 23.8 | 27.4 | 29.3 | 22.2 |
| Bin2     | 0.5  | 0.0  | 0.0   | 3.5   | 6.9  | 0.0   | 0.9  | 0.1   | 0.2  | 0.5  | 0.1  | 0.2  |
| Bin3     | 14.6 | 14.9 | 14.1  | 16.0  | 17.0 | 14.9  | 16.2 | 17.4  | 13.6 | 13.6 | 17.3 | 15.5 |
| Birc2    | 17.7 | 18.0 | 21.9  | 15.0  | 22.6 | 14.7  | 13.3 | 13.5  | 15.5 | 12.3 | 12.1 | 17.8 |
| Birc3    | 7.8  | 6.8  | 7.3   | 9.6   | 13.3 | 6.4   | 9.0  | 6.3   | 6.0  | 4.9  | 5.7  | 6.9  |
| Birc5    | 3.5  | 7.8  | 12.7  | 2.0   | 12.6 | 1.5   | 15.1 | 5.6   | 11.5 | 5.2  | 9.4  | 7.7  |
| Birc6    | 12.7 | 13.6 | 12.1  | 12.7  | 14.3 | 11.4  | 13.5 | 13.8  | 11.9 | 12.4 | 13.5 | 11.6 |
| Birc7    | 0.0  | 0.1  | 0.0   | 0.0   | 0.0  | 0.2   | 0.0  | 0.0   | 0.0  | 0.0  | 0.1  | 0.0  |
| Bivm     | 5.7  | 5.8  | 6.0   | 6.7   | 4.3  | 6.7   | 4.6  | 6.1   | 5.5  | 5.2  | 5.6  | 6.0  |
| Blcap    | 15.7 | 15.9 | 14.7  | 19.3  | 18.4 | 16.8  | 15.1 | 12.9  | 15.5 | 15.8 | 15.9 | 14.1 |
| Blk      | 0.0  | 0.0  | 0.0   | 0.0   | 0.0  | 0.0   | 0.0  | 0.0   | 0.0  | 0.0  | 0.0  | 0.0  |
| Blm      | 0.8  | 1.1  | 1.7   | 0.5   | 1.4  | 0.6   | 1.4  | 1.0   | 1.2  | 0.6  | 1.1  | 0.8  |
| Blmh     | 14.7 | 16.6 | 19.2  | 15.7  | 15.1 | 15.8  | 13.0 | 17.5  | 17.5 | 15.5 | 14.7 | 16.8 |
| Blnk     | 0.4  | 0.0  | 0.0   | 2.6   | 6.1  | 0.0   | 0.8  | 0.1   | 0.1  | 0.3  | 0.1  | 0.2  |
| Bloc1s1  | 75.8 | 65.3 | 66.2  | 72.0  | 62.9 | 78.4  | 69.8 | 87.5  | 73.8 | 77.6 | 78.0 | 75.6 |
| Bloc1s2a | 27.4 | 26.7 | 23.3  | 24.5  | 27.4 | 25.2  | 22.9 | 21.2  | 23.7 | 30.0 | 24.7 | 21.7 |
| Bloc1s3  | 5.5  | 5.2  | 5.1   | 6.3   | 5.6  | 6.2   | 5.6  | 5.4   | 5.6  | 5.7  | 4.9  | 5.2  |
| Bloc1s4  | 9.0  | 7.6  | 7.4   | 8.8   | 8.9  | 8.4   | 8.1  | 7.3   | 9.3  | 9.5  | 8.3  | 9.5  |
| Bloc1s5  | 10.8 | 10.4 | 9.1   | 10.2  | 9.2  | 9.5   | 8.2  | 9.7   | 8.2  | 9.0  | 8.8  | 9.9  |
| Bloc1s6  | 6.8  | 6.9  | 5.9   | 7.2   | 6.8  | 6.8   | 5.1  | 5.7   | 5.7  | 5.9  | 6.1  | 5.6  |
| Blvra    | 13.8 | 13.6 | 14.7  | 14.5  | 18.3 | 14.3  | 12.7 | 14.9  | 11.7 | 12.3 | 12.7 | 14.7 |
| Blvrb    | 55.2 | 58.1 | 37.3  | 134.3 | 95.2 | 115.1 | 28.8 | 39.4  | 17.6 | 22.5 | 21.9 | 20.4 |
| Blzf1    | 8.0  | 7.9  | 8.1   | 9.4   | 7.4  | 7.7   | 7.6  | 7.4   | 7.9  | 7.2  | 9.7  | 9.4  |
| Bmf      | 0.4  | 0.7  | 0.7   | 0.4   | 0.5  | 0.4   | 0.4  | 1.1   | 0.7  | 0.6  | 0.5  | 0.4  |
| Bmi1     | 13.8 | 14.0 | 16.0  | 17.7  | 13.4 | 18.6  | 12.7 | 12.2  | 13.0 | 13.9 | 17.9 | 18.1 |
| Bmp1     | 65.2 | 59.2 | 62.0  | 49.0  | 76.8 | 52.2  | 82.4 | 74.9  | 90.7 | 84.6 | 73.8 | 80.3 |
| Bmp15    | 0.1  | 0.0  | 0.0   | 0.0   | 0.0  | 0.0   | 0.0  | 0.0   | 0.0  | 0.0  | 0.0  | 0.0  |
| Bmp2     | 0.1  | 0.1  | 0.1   | 0.1   | 0.1  | 0.0   | 0.0  | 0.1   | 0.1  | 0.0  | 0.0  | 0.0  |
| Bmp2k    | 6.5  | 8.0  | 8.0   | 6.7   | 8.3  | 5.4   | 7.2  | 6.1   | 7.3  | 12.5 | 8.6  | 9.2  |
| Bmp3     | 0.3  | 0.0  | 0.2   | 0.2   | 0.0  | 0.0   | 0.0  | 0.0   | 0.3  | 0.1  | 0.1  | 0.0  |
| Bmp4     | 56.4 | 51.5 | 51.0  | 36.8  | 29.9 | 25.4  | 43.0 | 45.1  | 50.9 | 33.5 | 49.3 | 49.9 |
| Bmp5     | 0.0  | 0.0  | 0.0   | 0.0   | 0.0  | 0.0   | 0.0  | 0.0   | 0.0  | 0.0  | 0.0  | 0.0  |
| Bmp6     | 40.3 | 52.2 | 42.2  | 45.7  | 40.9 | 47.1  | 48.6 | 48.6  | 44.0 | 33.2 | 35.6 | 30.3 |
| Bmp8a    | 0.6  | 0.4  | 0.2   | 0.5   | 0.5  | 0.6   | 0.5  | 0.2   | 0.3  | 0.4  | 0.4  | 0.3  |
| Bmp8b    | 0.1  | 0.0  | 0.1   | 0.1   | 0.1  | 0.1   | 0.1  | 0.0   | 0.0  | 0.1  | 0.0  | 0.0  |
| Bmper    | 12.5 | 14.6 | 15.1  | 10.5  | 13.7 | 9.0   | 25.5 | 28.7  | 36.1 | 43.7 | 32.4 | 42.0 |
| Bmpr1a   | 29.4 | 34.0 | 39.5  | 28.3  | 27.9 | 29.6  | 31.4 | 35.9  | 35.3 | 42.8 | 42.0 | 46.1 |
| Bmpr1b   | 0.4  | 0.2  | 0.2   | 0.5   | 0.3  | 0.3   | 0.3  | 0.2   | 0.1  | 0.6  | 0.6  | 0.4  |
| Bmpr2    | 14.1 | 16.4 | 18.7  | 15.0  | 13.8 | 15.2  | 16.6 | 14.5  | 12.4 | 13.5 | 14.6 | 15.5 |
| Bms1     | 15.3 | 14.3 | 16.6  | 19.0  | 17.0 | 15.9  | 16.3 | 15.3  | 14.0 | 13.7 | 17.0 | 16.1 |
| Bmx      | 5.9  | 10.3 | 24.6  | 1.0   | 3.4  | 0.8   | 8.0  | 19.4  | 7.8  | 6.5  | 5.7  | 10.9 |
| Bmyc     | 2.7  | 2.8  | 3.7   | 4.0   | 3.7  | 3.8   | 4.0  | 4.7   | 4.9  | 3.9  | 2.9  | 4.3  |
| Bnc1     | 14.3 | 6.2  | 3.6   | 6.1   | 1.9  | 5.6   | 1.5  | 1.8   | 2.3  | 19.9 | 11.1 | 7.0  |
| Bnc2     | 2.2  | 3.8  | 6.5   | 2.3   | 3.2  | 2.3   | 4.6  | 5.2   | 4.9  | 4.1  | 3.9  | 5.2  |
| Bnip1    | 11.4 | 10.9 | 10.1  | 9.9   | 11.2 | 10.8  | 11.9 | 9.8   | 10.4 | 9.9  | 10.9 | 10.3 |
| Bnip2    | 39.9 | 35.8 | 32.2  | 49.8  | 35.0 | 41.9  | 36.6 | 29.4  | 32.1 | 34.9 | 39.1 | 37.5 |
| Bnip3    | 23.0 | 25.5 | 25.0  | 24.3  | 22.8 | 31.3  | 24.1 | 17.1  | 26.1 | 22.0 | 23.6 | 31.4 |
| Bnip3l   | 30.0 | 34.6 | 33.3  | 37.8  | 32.6 | 38.9  | 30.8 | 33.3  | 31.4 | 41.2 | 36.2 | 39.3 |
| Bnpl     | 0.1  | 0.0  | 0.0   | 0.0   | 0.1  | 0.1   | 0.2  | 0.1   | 0.1  | 0.1  | 0.0  | 0.1  |
| Boc      | 5.9  | 7.1  | 7.9   | 4.8   | 4.9  | 4.7   | 8.8  | 8.5   | 8.6  | 6.4  | 6.3  | 7.4  |
| Bod1     | 39.3 | 36.3 | 26.2  | 43.5  | 26.6 | 47.2  | 28.9 | 28.0  | 29.3 | 28.5 | 29.8 | 27.7 |
| Bod1l    | 23.5 | 24.0 | 21.6  | 24.4  | 19.7 | 19.2  | 23.8 | 18.2  | 18.3 | 18.4 | 25.9 | 22.8 |

Online Table 1



|        |       |       |       |       |       |       |       |       |       |       |       |       |
|--------|-------|-------|-------|-------|-------|-------|-------|-------|-------|-------|-------|-------|
| Bok    | 4.3   | 4.3   | 3.9   | 4.6   | 8.8   | 4.5   | 7.2   | 5.2   | 7.6   | 7.1   | 5.2   | 5.7   |
| Bola1  | 9.9   | 9.6   | 9.2   | 8.2   | 9.4   | 9.2   | 11.2  | 9.8   | 10.7  | 9.5   | 10.5  | 9.2   |
| Bola2  | 109.9 | 78.9  | 66.8  | 103.3 | 86.2  | 119.1 | 91.8  | 84.1  | 85.8  | 86.3  | 81.6  | 78.8  |
| Bola3  | 64.4  | 46.7  | 50.5  | 88.5  | 51.3  | 74.9  | 56.4  | 46.1  | 40.2  | 47.4  | 55.1  | 53.9  |
| Bop1   | 19.8  | 17.4  | 14.6  | 19.6  | 19.8  | 16.6  | 19.9  | 17.1  | 17.3  | 18.1  | 18.0  | 15.7  |
| Bora   | 0.7   | 1.1   | 1.2   | 0.4   | 1.3   | 0.4   | 1.2   | 1.0   | 1.4   | 0.9   | 1.1   | 0.7   |
| Bpgm   | 14.4  | 12.2  | 9.8   | 17.3  | 10.7  | 16.9  | 10.9  | 9.0   | 7.5   | 8.3   | 10.3  | 9.7   |
| Bphl   | 25.4  | 24.0  | 19.9  | 26.8  | 21.0  | 26.5  | 18.7  | 20.2  | 20.6  | 22.4  | 20.9  | 20.3  |
| Bpnt1  | 24.0  | 22.9  | 20.1  | 25.2  | 21.4  | 24.6  | 22.0  | 16.3  | 18.8  | 22.9  | 25.2  | 21.4  |
| Bptf   | 7.6   | 7.7   | 8.1   | 8.5   | 7.5   | 6.9   | 8.5   | 7.5   | 7.1   | 8.4   | 9.2   | 8.7   |
| Braf   | 5.6   | 7.5   | 7.1   | 5.8   | 4.8   | 5.6   | 5.6   | 5.0   | 5.7   | 5.6   | 6.2   | 6.1   |
| Brap   | 16.0  | 14.6  | 15.8  | 18.1  | 15.7  | 16.4  | 16.2  | 15.4  | 14.7  | 15.8  | 16.8  | 16.8  |
| Brat1  | 5.1   | 5.0   | 4.5   | 3.9   | 5.1   | 5.0   | 4.7   | 4.4   | 5.3   | 4.8   | 3.7   | 4.2   |
| Brca1  | 1.3   | 2.4   | 3.6   | 0.8   | 3.1   | 0.9   | 3.2   | 1.9   | 2.6   | 1.4   | 2.0   | 1.8   |
| Brca2  | 0.6   | 1.0   | 1.3   | 0.3   | 0.7   | 0.5   | 1.0   | 0.8   | 0.7   | 0.5   | 0.8   | 0.5   |
| Brcc3  | 10.3  | 9.5   | 8.2   | 9.4   | 8.2   | 9.8   | 6.1   | 8.3   | 8.0   | 7.6   | 9.4   | 8.8   |
| Brd1   | 9.7   | 11.5  | 11.3  | 9.2   | 10.0  | 11.3  | 10.7  | 10.3  | 10.9  | 9.4   | 11.4  | 10.2  |
| Brd2   | 29.1  | 27.7  | 26.3  | 33.1  | 30.1  | 31.3  | 35.8  | 32.3  | 30.8  | 37.3  | 35.2  | 34.1  |
| Brd3   | 8.2   | 10.5  | 10.7  | 8.8   | 8.8   | 8.9   | 11.6  | 10.4  | 9.2   | 7.9   | 9.2   | 9.7   |
| Brd4   | 1.5   | 1.6   | 2.5   | 1.1   | 2.1   | 1.5   | 3.3   | 2.8   | 2.4   | 2.1   | 2.1   | 2.0   |
| Brd7   | 15.2  | 16.8  | 21.4  | 17.2  | 18.2  | 15.1  | 17.4  | 21.2  | 16.3  | 17.2  | 21.1  | 22.7  |
| Brd8   | 7.7   | 7.7   | 9.0   | 7.9   | 7.5   | 7.0   | 9.1   | 9.4   | 9.1   | 7.5   | 9.1   | 8.8   |
| Brd9   | 12.9  | 13.1  | 16.7  | 15.0  | 12.3  | 14.7  | 17.4  | 15.5  | 13.8  | 11.9  | 15.6  | 15.9  |
| Brdt   | 0.2   | 0.3   | 0.4   | 0.3   | 0.3   | 0.3   | 0.3   | 0.2   | 0.2   | 0.3   | 0.2   | 0.3   |
| Bre    | 33.8  | 30.8  | 25.6  | 34.8  | 27.5  | 34.6  | 27.9  | 31.3  | 25.7  | 25.4  | 31.3  | 28.3  |
| Brf1   | 9.5   | 10.1  | 9.0   | 9.2   | 9.4   | 10.4  | 10.3  | 10.0  | 9.5   | 8.4   | 8.8   | 9.7   |
| Brf2   | 5.2   | 4.6   | 4.8   | 5.0   | 3.9   | 5.0   | 4.6   | 4.6   | 4.7   | 4.2   | 3.8   | 4.2   |
| Bri3   | 22.8  | 20.7  | 21.5  | 28.7  | 20.0  | 27.3  | 19.1  | 19.8  | 21.5  | 27.1  | 19.6  | 24.2  |
| Bri3bp | 4.0   | 4.2   | 4.2   | 4.1   | 3.5   | 5.1   | 4.0   | 3.4   | 3.4   | 3.8   | 3.2   | 3.6   |
| Bricd5 | 0.8   | 0.8   | 0.6   | 1.3   | 0.9   | 1.0   | 1.5   | 0.5   | 0.8   | 0.7   | 1.4   | 0.5   |
| Brip1  | 0.6   | 1.1   | 1.8   | 0.4   | 1.6   | 0.4   | 1.8   | 0.8   | 1.3   | 0.9   | 1.2   | 1.1   |
| Brix1  | 9.9   | 11.6  | 11.5  | 10.7  | 10.4  | 10.1  | 10.6  | 10.9  | 8.4   | 12.0  | 11.9  | 12.3  |
| Brk1   | 82.2  | 76.6  | 67.4  | 83.5  | 78.6  | 85.1  | 75.9  | 77.5  | 81.4  | 92.9  | 82.2  | 76.7  |
| Brms1  | 7.2   | 6.6   | 7.5   | 6.7   | 9.1   | 5.9   | 6.5   | 8.4   | 7.2   | 7.3   | 7.3   | 7.5   |
| Brms1l | 13.1  | 12.8  | 15.2  | 12.1  | 11.0  | 11.5  | 12.8  | 13.9  | 13.0  | 11.0  | 12.3  | 12.4  |
| Brox   | 31.5  | 29.1  | 26.2  | 35.1  | 32.7  | 31.3  | 29.2  | 24.5  | 28.3  | 29.5  | 30.9  | 30.0  |
| Brpf1  | 3.7   | 3.9   | 4.7   | 4.0   | 5.1   | 3.5   | 5.6   | 4.8   | 4.6   | 3.6   | 4.0   | 4.2   |
| Brpf3  | 1.5   | 1.8   | 2.2   | 1.1   | 1.8   | 1.7   | 2.2   | 2.2   | 2.0   | 1.6   | 1.6   | 1.6   |
| Brsk1  | 2.2   | 3.7   | 3.2   | 2.4   | 3.1   | 2.5   | 4.2   | 1.9   | 3.9   | 2.9   | 3.2   | 3.5   |
| Brsk2  | 0.1   | 0.0   | 0.0   | 0.0   | 0.1   | 0.1   | 0.1   | 0.1   | 0.0   | 0.0   | 0.0   | 0.0   |
| Brwd1  | 19.0  | 17.8  | 15.2  | 16.6  | 15.9  | 17.4  | 13.7  | 14.4  | 15.1  | 18.7  | 16.4  | 15.4  |
| Brwd3  | 2.0   | 2.4   | 2.6   | 1.8   | 2.3   | 1.5   | 2.1   | 2.3   | 2.1   | 2.0   | 2.8   | 2.7   |
| Bscl2  | 29.9  | 29.8  | 26.8  | 23.6  | 29.2  | 24.2  | 25.4  | 25.7  | 25.8  | 30.7  | 25.2  | 29.1  |
| Bsdc1  | 30.0  | 26.9  | 22.5  | 32.3  | 26.0  | 28.3  | 24.8  | 22.0  | 23.8  | 26.5  | 27.4  | 26.0  |
| Bsg    | 288.1 | 269.8 | 248.6 | 319.5 | 260.5 | 325.4 | 255.4 | 238.3 | 266.5 | 301.3 | 277.4 | 333.5 |
| Bsn    | 0.0   | 0.0   | 0.0   | 0.0   | 0.0   | 0.0   | 0.0   | 0.0   | 0.0   | 0.0   | 0.0   | 0.0   |
| Bspry  | 0.1   | 0.1   | 0.1   | 0.0   | 0.1   | 0.1   | 0.0   | 0.1   | 0.1   | 0.1   | 0.1   | 0.0   |
| Bst1   | 1.2   | 0.7   | 0.5   | 1.4   | 1.7   | 0.9   | 1.0   | 0.4   | 0.3   | 0.8   | 0.4   | 0.3   |
| Bst2   | 167.8 | 83.3  | 58.8  | 279.6 | 110.3 | 133.5 | 39.5  | 27.9  | 33.0  | 39.6  | 25.5  | 60.7  |
| Btaf1  | 11.2  | 11.9  | 10.8  | 11.5  | 11.5  | 11.5  | 11.3  | 11.2  | 12.0  | 12.5  | 13.1  | 13.0  |
| Btbd1  | 45.6  | 38.4  | 33.6  | 52.3  | 35.5  | 49.6  | 35.6  | 29.8  | 32.3  | 37.8  | 39.4  | 41.4  |
| Btbd10 | 14.8  | 16.0  | 12.5  | 16.8  | 14.0  | 15.0  | 14.5  | 12.6  | 13.4  | 12.1  | 14.8  | 14.3  |
| Btbd11 | 0.6   | 0.3   | 0.3   | 0.4   | 0.3   | 0.6   | 0.3   | 0.2   | 0.2   | 0.2   | 0.2   | 0.2   |
| Btbd16 | 0.0   | 0.0   | 0.1   | 0.0   | 0.0   | 0.0   | 0.0   | 0.0   | 0.0   | 0.0   | 0.0   | 0.1   |
| Btbd19 | 4.4   | 3.1   | 2.5   | 5.1   | 3.5   | 3.8   | 3.6   | 2.5   | 2.8   | 3.4   | 2.7   | 2.3   |
| Btbd2  | 6.6   | 7.7   | 8.6   | 7.0   | 6.4   | 8.3   | 6.5   | 7.9   | 7.6   | 7.7   | 5.9   | 6.1   |
| Btbd3  | 2.5   | 3.7   | 4.4   | 2.4   | 4.1   | 2.8   | 4.5   | 6.3   | 6.6   | 4.5   | 4.8   | 4.0   |

Online Table 1

|               |       |       |       |       |       |       |       |       |       |       |       |       |
|---------------|-------|-------|-------|-------|-------|-------|-------|-------|-------|-------|-------|-------|
| Btbd6         | 2.9   | 3.5   | 3.3   | 3.1   | 3.3   | 4.1   | 2.2   | 3.2   | 2.7   | 3.4   | 3.0   | 2.6   |
| Btbd7         | 14.4  | 15.9  | 15.9  | 15.2  | 13.4  | 14.2  | 15.7  | 15.9  | 16.2  | 13.5  | 17.2  | 15.4  |
| Btbd8         | 2.4   | 2.1   | 1.4   | 1.5   | 1.5   | 1.2   | 1.4   | 1.8   | 1.5   | 2.1   | 1.8   | 1.7   |
| Btbd9         | 2.6   | 2.5   | 2.8   | 2.3   | 2.6   | 2.3   | 2.6   | 2.6   | 2.7   | 3.2   | 2.8   | 2.4   |
| Btc           | 1.3   | 1.1   | 1.3   | 0.9   | 0.9   | 1.4   | 1.2   | 1.6   | 0.7   | 0.8   | 1.4   | 1.2   |
| Btd           | 11.6  | 12.7  | 16.1  | 11.0  | 13.3  | 11.3  | 16.3  | 15.3  | 15.0  | 11.9  | 12.2  | 13.1  |
| Btf3          | 254.4 | 222.5 | 196.0 | 222.6 | 208.1 | 221.6 | 203.3 | 230.3 | 217.1 | 252.7 | 270.5 | 237.8 |
| Btf3l4        | 14.4  | 13.0  | 12.6  | 12.6  | 12.0  | 13.4  | 11.2  | 14.4  | 13.5  | 17.1  | 15.0  | 14.8  |
| Btg1          | 6.2   | 6.9   | 6.9   | 6.7   | 10.9  | 5.3   | 6.7   | 6.5   | 8.3   | 9.6   | 6.7   | 8.4   |
| Btg2          | 16.0  | 16.2  | 15.4  | 14.3  | 16.1  | 13.9  | 11.7  | 9.0   | 13.8  | 48.4  | 17.0  | 17.0  |
| Btg3          | 4.8   | 0.0   | 0.0   | 0.0   | 0.0   | 0.0   | 0.0   | 8.2   | 1.1   | 0.0   | 0.0   | 5.1   |
| Btk           | 0.3   | 0.0   | 0.0   | 1.6   | 3.7   | 0.0   | 0.6   | 0.1   | 0.0   | 0.2   | 0.1   | 0.1   |
| Btla          | 0.0   | 0.0   | 0.0   | 0.0   | 0.0   | 0.0   | 0.0   | 0.0   | 0.0   | 0.0   | 0.0   | 0.0   |
| Btn2a2        | 0.0   | 0.0   | 0.0   | 0.0   | 0.0   | 0.0   | 0.0   | 0.0   | 0.0   | 0.0   | 0.0   | 0.0   |
| Btnl9         | 0.1   | 0.0   | 0.0   | 0.0   | 0.0   | 0.0   | 0.1   | 0.0   | 0.1   | 0.0   | 0.0   | 0.0   |
| Btrc          | 4.3   | 4.4   | 3.6   | 4.5   | 3.2   | 4.2   | 3.8   | 3.6   | 3.4   | 3.7   | 4.1   | 4.1   |
| Bub1          | 0.8   | 2.1   | 3.2   | 0.6   | 3.2   | 0.4   | 3.6   | 1.3   | 3.1   | 1.5   | 2.4   | 1.6   |
| Bub1b         | 2.5   | 4.6   | 6.9   | 1.7   | 5.5   | 1.8   | 6.8   | 3.8   | 5.3   | 3.3   | 5.1   | 4.1   |
| Bub3          | 31.6  | 28.5  | 26.5  | 32.2  | 30.3  | 28.3  | 32.4  | 29.5  | 29.9  | 28.6  | 30.8  | 27.1  |
| Bud13         | 3.3   | 2.9   | 3.6   | 3.3   | 3.1   | 3.0   | 3.7   | 3.3   | 3.2   | 2.9   | 3.6   | 3.4   |
| Bud31         | 32.1  | 27.2  | 27.0  | 35.4  | 28.6  | 26.1  | 26.7  | 30.1  | 30.9  | 32.9  | 34.2  | 28.7  |
| Bves          | 0.0   | 0.0   | 0.0   | 0.0   | 0.0   | 0.0   | 0.0   | 0.0   | 0.0   | 0.1   | 0.0   | 0.0   |
| Bysl          | 9.9   | 8.9   | 8.3   | 9.9   | 9.3   | 8.7   | 11.4  | 9.4   | 9.6   | 9.9   | 9.5   | 9.6   |
| Bzrap1        | 0.0   | 0.0   | 0.0   | 0.0   | 0.1   | 0.0   | 0.0   | 0.0   | 0.0   | 0.0   | 0.0   | 0.0   |
| Bzw1          | 79.4  | 68.8  | 57.9  | 76.2  | 74.3  | 68.4  | 63.1  | 63.8  | 67.8  | 78.0  | 78.0  | 74.7  |
| Bzw2          | 8.9   | 8.1   | 7.7   | 7.0   | 8.3   | 7.4   | 9.1   | 12.8  | 10.2  | 12.1  | 13.6  | 10.2  |
| C030006K11Rik | 5.0   | 5.0   | 3.8   | 6.1   | 3.6   | 5.9   | 4.3   | 6.0   | 5.4   | 5.7   | 4.2   | 5.6   |
| C030016D13Rik | 0.1   | 0.1   | 0.1   | 0.1   | 0.1   | 0.2   | 0.2   | 0.2   | 0.1   | 0.0   | 0.1   | 0.2   |
| C030030A07Rik | 0.0   | 0.0   | 0.0   | 0.1   | 0.0   | 0.1   | 0.0   | 0.0   | 0.1   | 0.1   | 0.0   | 0.0   |
| C030034I22Rik | 0.4   | 0.4   | 0.5   | 0.4   | 0.4   | 0.4   | 0.6   | 0.5   | 0.3   | 0.5   | 0.5   | 0.5   |
| C030034L19Rik | 0.0   | 0.0   | 0.0   | 0.0   | 0.2   | 0.0   | 0.0   | 0.0   | 0.0   | 0.0   | 0.0   | 0.0   |
| C030037D09Rik | 2.5   | 2.1   | 2.2   | 3.5   | 2.7   | 3.2   | 1.9   | 1.7   | 2.1   | 1.5   | 1.4   | 1.7   |
| C030039L03Rik | 0.5   | 0.5   | 0.6   | 0.4   | 0.5   | 0.7   | 0.3   | 0.4   | 0.5   | 0.5   | 0.5   | 0.5   |
| C030046E11Rik | 9.0   | 10.6  | 10.2  | 7.8   | 8.6   | 7.9   | 8.6   | 8.8   | 9.0   | 9.3   | 9.4   | 8.9   |
| C130021I20Rik | 0.0   | 0.0   | 0.0   | 0.1   | 0.0   | 0.0   | 0.0   | 0.0   | 0.0   | 0.0   | 0.0   | 0.0   |
| C130026I21Rik | 0.8   | 1.2   | 1.5   | 0.8   | 1.1   | 0.7   | 0.6   | 0.5   | 0.5   | 0.9   | 0.7   | 0.9   |
| C130026L21Rik | 0.0   | 0.0   | 0.1   | 0.0   | 0.0   | 0.0   | 0.0   | 0.0   | 0.0   | 0.0   | 0.0   | 0.0   |
| C130036L24Rik | 0.4   | 0.5   | 0.2   | 0.4   | 0.2   | 0.5   | 0.6   | 0.4   | 0.5   | 0.3   | 0.2   | 0.2   |
| C130050O18Rik | 0.1   | 0.1   | 0.1   | 0.6   | 1.3   | 0.0   | 0.2   | 0.1   | 0.1   | 0.2   | 0.1   | 0.1   |
| C130060C02Rik | 0.3   | 0.3   | 0.2   | 0.2   | 0.2   | 0.1   | 0.2   | 0.0   | 0.2   | 0.0   | 0.1   | 0.1   |
| C130074G19Rik | 1.7   | 1.3   | 1.2   | 0.7   | 0.4   | 0.5   | 0.8   | 0.8   | 0.7   | 0.7   | 0.9   | 1.1   |
| C130079G13Rik | 0.0   | 0.0   | 0.0   | 0.0   | 0.0   | 0.0   | 0.0   | 0.0   | 0.0   | 0.0   | 0.0   | 0.0   |
| C130083M11Rik | 3.7   | 4.0   | 4.3   | 3.6   | 3.2   | 4.1   | 3.0   | 2.8   | 2.9   | 3.7   | 4.2   | 3.9   |
| C1d           | 9.3   | 9.5   | 8.9   | 9.1   | 7.2   | 8.5   | 6.9   | 8.2   | 8.1   | 9.0   | 9.8   | 10.1  |
| C1galt1       | 11.0  | 12.7  | 15.3  | 6.5   | 12.2  | 9.0   | 10.0  | 13.1  | 13.8  | 10.5  | 14.4  | 14.2  |
| C1galt1c1     | 19.7  | 16.1  | 13.1  | 19.4  | 16.9  | 16.2  | 16.3  | 14.2  | 18.3  | 21.4  | 19.9  | 21.7  |
| C1qa          | 7.1   | 0.1   | 0.4   | 81.4  | 93.8  | 0.1   | 4.4   | 2.2   | 1.2   | 5.5   | 3.0   | 6.4   |
| C1qb          | 9.6   | 0.0   | 0.4   | 91.0  | 137.0 | 0.0   | 10.5  | 2.5   | 1.7   | 7.9   | 2.5   | 7.5   |
| C1qbp         | 37.0  | 27.5  | 26.4  | 38.1  | 29.3  | 34.4  | 26.3  | 26.6  | 20.4  | 30.3  | 32.1  | 27.1  |
| C1qc          | 9.0   | 0.0   | 0.4   | 88.2  | 117.4 | 0.0   | 10.3  | 2.3   | 1.9   | 6.6   | 2.2   | 5.3   |
| C1ql1         | 0.0   | 0.1   | 0.0   | 0.1   | 0.0   | 0.1   | 0.1   | 0.0   | 0.1   | 0.2   | 0.1   | 0.0   |
| C1ql3         | 4.5   | 3.2   | 2.8   | 6.1   | 3.4   | 5.5   | 4.9   | 3.3   | 4.4   | 4.4   | 5.8   | 5.5   |
| C1qtnf1       | 0.6   | 0.7   | 1.3   | 0.2   | 0.7   | 0.3   | 0.8   | 2.7   | 1.7   | 2.6   | 1.3   | 1.6   |
| C1qtnf2       | 6.0   | 2.2   | 2.5   | 10.5  | 3.5   | 5.9   | 5.3   | 3.8   | 3.4   | 2.4   | 3.3   | 3.8   |
| C1qtnf3       | 0.2   | 0.0   | 0.0   | 0.2   | 0.1   | 0.1   | 0.4   | 0.6   | 0.1   | 1.1   | 2.8   | 0.2   |
| C1qtnf4       | 0.1   | 0.1   | 0.0   | 0.0   | 0.0   | 0.0   | 0.1   | 0.0   | 0.0   | 0.1   | 0.0   | 0.1   |
| C1qtnf5       | 23.0  | 12.5  | 13.7  | 32.0  | 18.5  | 28.7  | 11.7  | 11.7  | 12.0  | 13.0  | 9.2   | 16.5  |

Online Table 1

|               |       |       |       |       |       |      |       |       |       |       |      |       |
|---------------|-------|-------|-------|-------|-------|------|-------|-------|-------|-------|------|-------|
| C1qtnf6       | 3.4   | 4.7   | 6.1   | 3.4   | 5.3   | 3.1  | 4.6   | 8.7   | 6.2   | 4.3   | 3.6  | 4.4   |
| C1qtnf7       | 5.9   | 6.1   | 11.5  | 10.5  | 4.5   | 6.3  | 3.8   | 14.4  | 4.0   | 4.3   | 4.8  | 3.9   |
| C1qtnf9       | 0.7   | 0.3   | 0.4   | 0.1   | 0.0   | 0.0  | 0.5   | 0.6   | 0.5   | 0.0   | 0.0  | 0.2   |
| C1ra          | 24.6  | 24.4  | 42.4  | 20.7  | 22.2  | 22.2 | 17.6  | 28.0  | 22.3  | 20.8  | 17.2 | 24.9  |
| C1rb          | 10.4  | 10.6  | 17.4  | 7.6   | 9.7   | 9.9  | 7.1   | 11.7  | 9.3   | 8.7   | 6.9  | 10.5  |
| C1rl          | 9.3   | 8.8   | 10.6  | 10.8  | 9.4   | 12.2 | 9.4   | 8.0   | 8.8   | 8.3   | 8.6  | 10.8  |
| C1s           | 27.6  | 31.8  | 50.8  | 22.2  | 36.8  | 27.3 | 18.6  | 23.8  | 21.6  | 65.8  | 44.7 | 41.1  |
| C2            | 4.6   | 3.0   | 2.0   | 3.6   | 2.0   | 3.2  | 0.4   | 0.6   | 0.9   | 7.7   | 2.3  | 2.5   |
| C230035I16Rik | 0.1   | 0.0   | 0.1   | 1.0   | 0.2   | 0.2  | 0.0   | 0.1   | 0.1   | 0.0   | 0.1  | 0.2   |
| C230052I12Rik | 2.1   | 1.8   | 2.2   | 2.5   | 2.4   | 2.1  | 2.0   | 2.4   | 2.2   | 2.5   | 2.0  | 2.0   |
| C230081A13Rik | 21.2  | 27.8  | 29.9  | 20.9  | 23.3  | 22.3 | 29.9  | 26.1  | 27.1  | 21.2  | 24.3 | 26.9  |
| C230091D08Rik | 2.2   | 2.8   | 3.5   | 3.2   | 2.8   | 3.2  | 2.7   | 3.0   | 2.6   | 2.6   | 3.1  | 3.2   |
| C2cd2         | 1.6   | 2.1   | 2.7   | 1.2   | 1.4   | 1.3  | 1.6   | 1.9   | 2.0   | 2.0   | 1.7  | 1.9   |
| C2cd2l        | 2.3   | 2.0   | 1.8   | 3.1   | 2.5   | 2.7  | 2.7   | 1.9   | 2.5   | 2.9   | 2.4  | 2.6   |
| C2cd3         | 2.1   | 2.4   | 2.4   | 2.2   | 2.4   | 2.6  | 2.3   | 2.6   | 2.1   | 2.0   | 2.6  | 2.1   |
| C2cd4c        | 0.0   | 0.0   | 0.0   | 0.0   | 0.0   | 0.0  | 0.0   | 0.0   | 0.0   | 0.0   | 0.0  | 0.0   |
| C2cd5         | 1.8   | 2.2   | 2.1   | 1.9   | 2.2   | 1.6  | 1.8   | 1.7   | 2.0   | 2.0   | 2.3  | 2.0   |
| C3            | 133.4 | 136.7 | 351.0 | 116.0 | 262.7 | 82.3 | 187.7 | 171.4 | 118.1 | 130.3 | 95.3 | 126.8 |
| C330005M16Rik | 0.1   | 0.0   | 0.0   | 0.0   | 0.2   | 0.0  | 0.0   | 0.0   | 0.0   | 0.0   | 0.0  | 0.0   |
| C330006A16Rik | 7.9   | 5.8   | 5.9   | 7.7   | 7.4   | 7.4  | 6.1   | 5.7   | 6.9   | 9.7   | 6.9  | 6.9   |
| C330007P06Rik | 21.2  | 18.7  | 20.8  | 27.3  | 19.0  | 24.9 | 16.4  | 18.5  | 15.2  | 18.0  | 19.9 | 20.4  |
| C330013E15Rik | 0.9   | 0.7   | 1.0   | 1.0   | 1.0   | 1.4  | 0.7   | 0.9   | 1.0   | 1.2   | 1.1  | 0.9   |
| C330013F16Rik | 0.0   | 0.0   | 0.0   | 0.0   | 0.0   | 0.0  | 0.0   | 0.0   | 0.0   | 0.0   | 0.0  | 0.0   |
| C330018D20Rik | 6.8   | 6.8   | 5.2   | 7.0   | 5.2   | 7.5  | 4.8   | 5.0   | 5.3   | 6.0   | 6.2  | 6.3   |
| C330021F23Rik | 2.2   | 2.2   | 2.0   | 2.6   | 2.1   | 1.8  | 2.2   | 2.5   | 1.6   | 2.0   | 2.2  | 2.7   |
| C330024C12Rik | 0.1   | 0.1   | 0.0   | 0.1   | 0.2   | 0.0  | 0.1   | 0.0   | 0.1   | 0.0   | 0.0  | 0.0   |
| C330024D21Rik | 0.1   | 0.2   | 0.1   | 0.2   | 0.2   | 0.1  | 0.1   | 0.2   | 0.1   | 0.1   | 0.1  | 0.2   |
| C330027C09Rik | 1.4   | 2.5   | 4.4   | 0.9   | 3.8   | 1.0  | 4.8   | 2.2   | 4.2   | 2.0   | 3.5  | 2.7   |
| C3ar1         | 1.9   | 0.1   | 0.2   | 17.0  | 29.3  | 0.1  | 3.3   | 0.5   | 0.5   | 1.7   | 0.6  | 1.6   |
| C430002E04Rik | 0.0   | 0.0   | 0.0   | 0.0   | 0.0   | 0.0  | 0.0   | 0.1   | 0.0   | 0.0   | 0.0  | 0.1   |
| C430049B03Rik | 0.1   | 0.1   | 0.1   | 0.0   | 0.3   | 0.0  | 0.1   | 0.2   | 0.4   | 0.6   | 1.0  | 0.4   |
| C4a           | 2.8   | 3.2   | 5.2   | 2.4   | 2.6   | 0.8  | 1.1   | 2.6   | 1.4   | 1.7   | 1.3  | 1.5   |
| C4b           | 16.7  | 18.6  | 30.3  | 14.9  | 14.3  | 4.4  | 6.0   | 14.8  | 7.5   | 9.1   | 6.8  | 9.3   |
| C4bp          | 0.7   | 0.8   | 0.5   | 0.2   | 0.3   | 0.1  | 0.2   | 0.1   | 0.1   | 0.5   | 0.5  | 0.7   |
| C530005A16Rik | 0.5   | 0.4   | 0.4   | 0.6   | 0.5   | 0.6  | 0.4   | 0.3   | 0.4   | 0.3   | 0.6  | 0.4   |
| C530008M17Rik | 0.1   | 0.1   | 0.1   | 0.1   | 0.2   | 0.2  | 0.2   | 0.1   | 0.2   | 0.1   | 0.2  | 0.1   |
| C530044C16Rik | 0.0   | 0.0   | 0.1   | 0.0   | 0.1   | 0.1  | 0.0   | 0.0   | 0.0   | 0.0   | 0.0  | 0.0   |
| C5ar1         | 1.0   | 0.0   | 0.1   | 11.7  | 19.6  | 0.0  | 1.6   | 0.4   | 0.2   | 1.0   | 0.3  | 0.8   |
| C5ar2         | 0.1   | 0.1   | 0.0   | 0.1   | 0.2   | 0.1  | 0.0   | 0.0   | 0.0   | 0.0   | 0.1  | 0.0   |
| C630043F03Rik | 0.1   | 0.0   | 0.0   | 0.0   | 0.1   | 0.1  | 0.0   | 0.1   | 0.1   | 0.1   | 0.0  | 0.1   |
| C7            | 0.0   | 0.2   | 0.4   | 0.0   | 0.1   | 0.0  | 0.1   | 0.1   | 0.0   | 0.0   | 0.0  | 0.0   |
| C730002L08Rik | 0.3   | 0.4   | 0.4   | 0.7   | 0.4   | 0.5  | 0.3   | 0.2   | 0.2   | 0.9   | 0.7  | 0.5   |
| C730027H18Rik | 0.1   | 0.1   | 0.1   | 0.0   | 0.0   | 0.0  | 0.0   | 0.1   | 0.0   | 0.0   | 0.0  | 0.0   |
| C730036E19Rik | 0.0   | 0.0   | 0.0   | 0.0   | 0.0   | 0.0  | 0.0   | 0.0   | 0.0   | 0.0   | 0.0  | 0.0   |
| C77080        | 1.8   | 2.2   | 1.8   | 1.9   | 1.8   | 2.6  | 1.8   | 1.6   | 1.6   | 2.2   | 1.8  | 1.5   |
| C77370        | 0.2   | 0.2   | 0.2   | 0.1   | 0.2   | 0.1  | 0.1   | 0.1   | 0.0   | 0.1   | 0.1  | 0.1   |
| C78339        | 24.2  | 20.2  | 18.3  | 21.7  | 17.7  | 21.3 | 20.2  | 17.7  | 21.1  | 23.1  | 25.0 | 22.4  |
| C87198        | 0.1   | 0.0   | 0.0   | 0.0   | 0.0   | 0.0  | 0.1   | 0.0   | 0.0   | 0.0   | 0.1  | 0.0   |
| C87436        | 4.8   | 5.8   | 5.1   | 4.6   | 4.2   | 5.4  | 4.6   | 4.9   | 4.8   | 4.6   | 4.3  | 4.2   |
| C8g           | 0.7   | 0.8   | 0.6   | 0.4   | 0.6   | 1.3  | 0.4   | 0.8   | 0.5   | 0.6   | 0.5  | 0.8   |
| C9            | 0.0   | 0.0   | 0.0   | 0.0   | 0.0   | 0.0  | 0.0   | 0.0   | 0.0   | 0.1   | 0.1  | 0.0   |
| C920006O11Rik | 0.8   | 1.2   | 0.9   | 0.6   | 0.8   | 1.3  | 0.7   | 1.0   | 0.9   | 1.1   | 0.7  | 1.1   |
| C920009B18Rik | 1.0   | 0.5   | 0.4   | 1.1   | 1.1   | 0.5  | 0.6   | 0.2   | 0.2   | 0.3   | 0.5  | 0.4   |
| C920021L13Rik | 0.1   | 0.2   | 0.3   | 0.2   | 0.1   | 0.3  | 0.5   | 0.4   | 0.3   | 0.1   | 0.1  | 0.1   |
| C920025E04Rik | 2.4   | 1.9   | 1.7   | 4.1   | 2.9   | 3.2  | 2.0   | 1.3   | 1.5   | 1.6   | 0.8  | 2.0   |
| Caap1         | 4.3   | 4.1   | 5.0   | 4.6   | 3.8   | 4.4  | 4.6   | 4.5   | 4.0   | 4.6   | 5.1  | 5.5   |
| Cab39         | 33.1  | 32.3  | 33.3  | 42.9  | 36.4  | 36.0 | 35.8  | 31.2  | 33.9  | 34.5  | 39.5 | 40.7  |

Online Table 1

|          |       |       |       |       |       |       |       |       |       |       |       |       |
|----------|-------|-------|-------|-------|-------|-------|-------|-------|-------|-------|-------|-------|
| Cab39I   | 18.3  | 16.8  | 16.0  | 19.7  | 14.9  | 19.3  | 15.4  | 13.8  | 13.0  | 12.7  | 16.0  | 13.0  |
| Cabin1   | 3.7   | 4.2   | 4.3   | 3.5   | 4.1   | 4.5   | 4.1   | 4.4   | 4.0   | 3.5   | 3.6   | 3.2   |
| Cables1  | 0.6   | 1.0   | 1.6   | 0.5   | 0.6   | 0.5   | 0.4   | 1.4   | 0.7   | 0.9   | 0.5   | 0.8   |
| Cables2  | 2.5   | 2.6   | 2.5   | 2.0   | 2.6   | 2.5   | 2.9   | 2.6   | 2.5   | 2.7   | 2.4   | 2.2   |
| Cabp1    | 0.7   | 0.4   | 0.4   | 0.6   | 0.5   | 0.2   | 0.4   | 0.7   | 0.4   | 0.4   | 0.7   | 0.5   |
| Cabp4    | 0.1   | 0.1   | 0.0   | 0.0   | 0.1   | 0.1   | 0.0   | 0.1   | 0.1   | 0.0   | 0.1   | 0.2   |
| Cabyr    | 0.3   | 0.4   | 0.2   | 0.5   | 0.2   | 0.1   | 0.3   | 0.2   | 0.2   | 0.3   | 0.1   | 0.2   |
| Cacfd1   | 5.4   | 6.0   | 6.3   | 4.9   | 5.8   | 6.6   | 6.3   | 6.0   | 5.0   | 5.8   | 5.5   | 5.5   |
| Cachd1   | 2.9   | 3.3   | 3.4   | 4.2   | 3.6   | 3.8   | 3.7   | 2.7   | 3.1   | 2.8   | 2.9   | 2.7   |
| Cacna1a  | 0.7   | 0.7   | 0.8   | 0.8   | 0.9   | 0.9   | 0.8   | 0.8   | 0.7   | 0.7   | 0.7   | 0.5   |
| Cacna1b  | 0.1   | 0.0   | 0.0   | 0.1   | 0.0   | 0.1   | 0.1   | 0.0   | 0.1   | 0.0   | 0.1   | 0.0   |
| Cacna1c  | 0.4   | 1.0   | 1.6   | 0.3   | 0.9   | 0.5   | 1.0   | 1.3   | 1.1   | 1.1   | 1.1   | 1.0   |
| Cacna1d  | 0.1   | 0.1   | 0.2   | 0.1   | 0.2   | 0.0   | 0.1   | 0.1   | 0.1   | 0.1   | 0.0   | 0.1   |
| Cacna1e  | 0.1   | 0.0   | 0.0   | 0.0   | 0.0   | 0.0   | 0.0   | 0.0   | 0.0   | 0.0   | 0.0   | 0.0   |
| Cacna1g  | 0.5   | 1.6   | 2.3   | 0.2   | 0.8   | 0.3   | 1.1   | 1.4   | 1.3   | 3.9   | 2.4   | 1.3   |
| Cacna1h  | 0.0   | 0.0   | 0.0   | 0.0   | 0.0   | 0.0   | 0.0   | 0.0   | 0.0   | 0.1   | 0.1   | 0.1   |
| Cacna1i  | 0.0   | 0.0   | 0.0   | 0.0   | 0.0   | 0.0   | 0.0   | 0.0   | 0.0   | 0.0   | 0.0   | 0.0   |
| Cacna1s  | 0.0   | 0.0   | 0.0   | 0.0   | 0.0   | 0.0   | 0.1   | 0.1   | 0.0   | 0.0   | 0.0   | 0.0   |
| Cacna2d1 | 4.5   | 4.1   | 4.9   | 3.6   | 4.9   | 4.5   | 4.9   | 5.1   | 4.1   | 4.7   | 5.3   | 5.7   |
| Cacna2d2 | 0.0   | 0.0   | 0.0   | 0.0   | 0.0   | 0.0   | 0.0   | 0.0   | 0.0   | 0.0   | 0.0   | 0.0   |
| Cacna2d3 | 0.1   | 0.0   | 0.0   | 0.0   | 0.0   | 0.0   | 0.0   | 0.0   | 0.0   | 0.0   | 0.0   | 0.0   |
| Cacna2d4 | 0.0   | 0.0   | 0.0   | 0.0   | 0.0   | 0.0   | 0.0   | 0.0   | 0.0   | 0.0   | 0.0   | 0.0   |
| Cacnb1   | 1.9   | 2.4   | 2.7   | 1.8   | 1.5   | 3.1   | 2.2   | 1.4   | 1.9   | 2.2   | 2.1   | 1.7   |
| Cacnb2   | 0.2   | 0.1   | 0.2   | 0.1   | 0.1   | 0.0   | 0.2   | 0.1   | 0.1   | 0.1   | 0.1   | 0.1   |
| Cacnb3   | 14.9  | 18.5  | 17.7  | 15.0  | 16.0  | 20.6  | 16.6  | 16.4  | 16.9  | 20.1  | 18.7  | 15.8  |
| Cacnb4   | 0.3   | 0.4   | 0.4   | 0.3   | 0.2   | 0.4   | 0.3   | 0.3   | 0.2   | 0.2   | 0.3   | 0.3   |
| Cacng7   | 8.1   | 9.4   | 9.3   | 10.0  | 7.8   | 14.8  | 12.1  | 9.0   | 8.0   | 7.0   | 6.8   | 6.9   |
| Cacng8   | 0.0   | 0.1   | 0.1   | 0.3   | 0.1   | 0.1   | 0.2   | 0.1   | 0.2   | 0.3   | 0.0   | 0.2   |
| Cactin   | 9.2   | 9.1   | 8.2   | 8.8   | 8.3   | 7.2   | 9.0   | 8.2   | 8.9   | 8.5   | 8.2   | 7.3   |
| Cacul1   | 12.5  | 10.8  | 9.4   | 13.4  | 12.7  | 9.9   | 11.9  | 10.8  | 12.0  | 12.3  | 12.6  | 10.9  |
| Cacybp   | 43.5  | 39.5  | 42.0  | 49.8  | 35.6  | 45.5  | 40.3  | 28.2  | 33.0  | 43.7  | 48.2  | 50.1  |
| Cad      | 4.8   | 5.2   | 4.3   | 3.9   | 5.4   | 3.8   | 5.3   | 4.9   | 4.7   | 4.6   | 4.2   | 3.7   |
| Cadm1    | 0.7   | 0.2   | 0.2   | 1.6   | 2.6   | 0.2   | 0.5   | 0.2   | 0.0   | 0.2   | 0.1   | 0.1   |
| Cadm2    | 0.0   | 0.0   | 0.0   | 0.0   | 0.0   | 0.0   | 0.0   | 0.0   | 0.0   | 0.0   | 0.0   | 0.0   |
| Cadm3    | 0.1   | 0.1   | 0.1   | 0.1   | 0.1   | 0.0   | 0.1   | 0.2   | 0.1   | 0.1   | 0.1   | 0.1   |
| Cadm4    | 1.1   | 1.0   | 0.5   | 1.4   | 0.7   | 1.5   | 1.3   | 2.0   | 4.4   | 11.3  | 4.2   | 3.9   |
| Cadps    | 0.0   | 0.0   | 0.0   | 0.0   | 0.0   | 0.0   | 0.0   | 0.0   | 0.0   | 0.0   | 0.0   | 0.0   |
| Cadps2   | 0.1   | 0.1   | 0.0   | 0.1   | 0.1   | 0.1   | 0.1   | 0.0   | 0.1   | 0.1   | 0.2   | 0.1   |
| Cage1    | 1.6   | 1.5   | 1.4   | 1.3   | 1.1   | 1.6   | 0.9   | 1.4   | 1.1   | 1.1   | 1.3   | 1.2   |
| Calca    | 0.0   | 0.0   | 0.0   | 0.0   | 0.0   | 0.0   | 0.0   | 0.4   | 0.1   | 0.1   | 0.2   | 0.1   |
| Calcb    | 0.0   | 0.0   | 0.1   | 0.0   | 0.0   | 0.0   | 0.0   | 0.0   | 0.0   | 0.0   | 0.0   | 0.0   |
| Calcoco1 | 15.9  | 15.2  | 17.0  | 19.1  | 12.3  | 20.2  | 14.4  | 16.2  | 12.6  | 17.5  | 16.3  | 16.2  |
| Calcoco2 | 0.0   | 0.0   | 0.0   | 0.0   | 0.0   | 0.0   | 0.0   | 0.0   | 0.1   | 0.0   | 0.0   | 0.0   |
| Calcrl   | 1.7   | 1.7   | 2.1   | 3.9   | 5.1   | 2.7   | 2.6   | 2.7   | 2.2   | 1.5   | 2.4   | 1.8   |
| Cald1    | 463.2 | 378.2 | 364.3 | 601.4 | 373.7 | 423.4 | 475.0 | 285.7 | 341.5 | 393.2 | 531.5 | 522.6 |
| Calhm1   | 0.0   | 0.2   | 0.0   | 0.0   | 0.0   | 0.1   | 0.0   | 0.0   | 0.0   | 0.0   | 0.0   | 0.0   |
| Calhm2   | 7.9   | 9.4   | 8.8   | 9.4   | 9.3   | 9.1   | 10.3  | 9.8   | 10.8  | 9.2   | 9.2   | 8.2   |
| Calm1    | 128.1 | 103.5 | 92.8  | 159.0 | 137.6 | 128.0 | 119.5 | 121.1 | 116.8 | 133.5 | 140.8 | 128.0 |
| Calm2    | 258.1 | 257.2 | 312.9 | 302.3 | 266.0 | 253.1 | 333.5 | 289.0 | 258.4 | 274.3 | 349.8 | 347.7 |
| Calm3    | 147.7 | 133.2 | 156.9 | 200.0 | 143.8 | 170.5 | 180.9 | 165.0 | 146.6 | 150.1 | 171.2 | 162.8 |
| Calm4    | 1.2   | 0.7   | 1.5   | 0.6   | 0.2   | 1.0   | 0.9   | 1.1   | 0.8   | 0.2   | 1.2   | 0.7   |
| Caln1    | 0.1   | 0.0   | 0.1   | 0.0   | 0.0   | 0.1   | 0.0   | 0.0   | 0.0   | 0.0   | 0.0   | 0.0   |
| Calr     | 841.4 | 652.9 | 695.9 | 966.8 | 658.1 | 669.9 | 907.9 | 764.3 | 658.8 | 784.3 | 919.5 | 994.3 |
| Calr3    | 2.3   | 1.5   | 1.5   | 3.6   | 2.0   | 3.3   | 1.3   | 1.1   | 0.7   | 1.1   | 0.9   | 1.2   |
| Calr4    | 0.4   | 0.5   | 0.3   | 0.3   | 0.3   | 0.3   | 0.7   | 0.4   | 0.6   | 0.3   | 0.5   | 0.5   |
| Calu     | 423.1 | 348.8 | 341.7 | 461.6 | 351.7 | 441.4 | 441.1 | 406.9 | 412.9 | 374.0 | 465.2 | 449.8 |
| Caly     | 0.1   | 0.0   | 0.0   | 0.2   | 0.0   | 0.2   | 0.0   | 0.0   | 0.0   | 0.0   | 0.1   | 0.1   |

Online Table 1

|         |       |       |       |       |       |       |       |       |       |       |       |       |
|---------|-------|-------|-------|-------|-------|-------|-------|-------|-------|-------|-------|-------|
| Camk1   | 73.3  | 56.4  | 48.3  | 87.9  | 63.2  | 67.2  | 53.7  | 45.1  | 51.3  | 68.0  | 65.5  | 58.8  |
| Camk1d  | 0.5   | 0.4   | 0.3   | 1.2   | 1.6   | 0.3   | 0.5   | 0.5   | 0.2   | 0.2   | 0.3   | 0.3   |
| Camk1g  | 0.0   | 0.0   | 0.0   | 0.0   | 0.0   | 0.0   | 0.0   | 0.1   | 0.0   | 0.0   | 0.0   | 0.0   |
| Camk2a  | 0.8   | 0.7   | 0.7   | 0.9   | 0.4   | 0.7   | 0.6   | 0.7   | 0.5   | 0.3   | 0.6   | 0.5   |
| Camk2b  | 0.3   | 0.2   | 0.2   | 0.4   | 0.2   | 0.3   | 0.2   | 0.0   | 0.1   | 0.1   | 0.1   | 0.1   |
| Camk2d  | 14.9  | 13.4  | 13.6  | 14.5  | 13.4  | 14.1  | 14.6  | 14.8  | 15.1  | 19.0  | 18.6  | 19.0  |
| Camk2g  | 18.1  | 17.5  | 15.9  | 16.5  | 15.8  | 17.0  | 22.2  | 17.8  | 22.2  | 21.3  | 23.2  | 22.1  |
| Camk2n1 | 5.9   | 3.9   | 2.5   | 12.8  | 4.9   | 10.3  | 4.4   | 2.2   | 3.8   | 3.7   | 3.5   | 3.8   |
| Camk2n2 | 2.2   | 2.0   | 2.1   | 3.2   | 2.0   | 2.8   | 2.4   | 1.7   | 1.9   | 2.0   | 1.6   | 1.8   |
| Camk4   | 0.0   | 0.0   | 0.0   | 0.0   | 0.0   | 0.0   | 0.1   | 0.1   | 0.1   | 0.1   | 0.2   | 0.1   |
| Camkk1  | 2.8   | 2.6   | 2.8   | 2.5   | 2.4   | 4.0   | 2.5   | 2.8   | 2.5   | 1.9   | 2.4   | 2.2   |
| Camkk2  | 7.9   | 11.4  | 16.2  | 6.9   | 11.8  | 6.4   | 10.9  | 12.9  | 9.8   | 9.2   | 8.9   | 9.7   |
| Camkmt  | 1.8   | 1.9   | 1.4   | 1.5   | 1.6   | 2.0   | 1.0   | 1.7   | 1.0   | 1.4   | 1.4   | 1.2   |
| Caml    | 28.5  | 28.2  | 23.8  | 34.2  | 24.2  | 28.9  | 30.3  | 21.2  | 25.8  | 26.1  | 30.1  | 27.7  |
| Camp    | 2.4   | 1.5   | 3.4   | 3.6   | 4.7   | 0.6   | 4.0   | 2.9   | 2.6   | 1.2   | 1.7   | 1.8   |
| Camsap1 | 8.0   | 7.9   | 8.1   | 8.0   | 6.5   | 8.2   | 8.2   | 6.6   | 7.6   | 7.9   | 8.0   | 7.8   |
| Camsap2 | 13.5  | 14.6  | 12.9  | 16.9  | 12.6  | 14.1  | 15.2  | 12.3  | 13.1  | 13.5  | 16.6  | 16.4  |
| Camsap3 | 0.9   | 1.0   | 0.9   | 0.8   | 0.8   | 0.5   | 0.7   | 0.7   | 0.8   | 0.4   | 0.4   | 0.5   |
| Camta1  | 0.5   | 0.6   | 0.8   | 0.8   | 0.7   | 0.6   | 0.9   | 0.9   | 0.6   | 0.8   | 0.6   | 0.9   |
| Camta2  | 1.5   | 2.0   | 1.9   | 1.6   | 2.3   | 1.8   | 2.1   | 1.6   | 1.9   | 1.5   | 1.6   | 1.4   |
| Cand1   | 19.7  | 20.3  | 19.0  | 17.8  | 19.0  | 18.4  | 19.9  | 19.1  | 20.0  | 20.8  | 20.9  | 20.4  |
| Cand2   | 1.1   | 1.7   | 1.8   | 0.8   | 1.2   | 1.5   | 1.1   | 1.6   | 1.3   | 1.2   | 1.1   | 1.0   |
| Cant1   | 15.8  | 15.2  | 16.2  | 14.2  | 15.5  | 17.9  | 16.3  | 17.8  | 18.2  | 17.5  | 15.1  | 16.9  |
| Canx    | 325.4 | 284.2 | 277.8 | 348.3 | 278.0 | 328.8 | 292.3 | 284.0 | 263.0 | 286.9 | 340.4 | 348.6 |
| Cap1    | 144.2 | 125.7 | 113.3 | 193.8 | 181.4 | 139.9 | 165.4 | 134.6 | 146.7 | 130.9 | 161.4 | 148.9 |
| Cap2    | 1.2   | 0.7   | 0.4   | 1.8   | 0.7   | 2.1   | 0.6   | 0.5   | 0.5   | 1.7   | 1.2   | 1.2   |
| Capg    | 92.4  | 75.4  | 67.1  | 142.4 | 170.1 | 104.2 | 81.9  | 71.1  | 67.7  | 77.7  | 74.3  | 80.5  |
| Capn1   | 15.6  | 14.6  | 15.6  | 16.1  | 15.2  | 17.7  | 15.8  | 16.4  | 13.6  | 14.6  | 14.4  | 14.3  |
| Capn10  | 3.6   | 3.9   | 3.6   | 3.6   | 3.4   | 3.5   | 4.7   | 4.0   | 4.4   | 4.1   | 4.3   | 4.3   |
| Capn11  | 0.1   | 0.1   | 0.0   | 0.0   | 0.1   | 0.3   | 0.1   | 0.2   | 0.1   | 0.2   | 0.1   | 0.0   |
| Capn12  | 0.0   | 0.0   | 0.1   | 0.1   | 0.1   | 0.1   | 0.0   | 0.1   | 0.1   | 0.0   | 0.1   | 0.1   |
| Capn2   | 156.6 | 136.6 | 118.8 | 167.2 | 139.4 | 147.9 | 161.8 | 126.8 | 135.9 | 162.8 | 172.4 | 141.0 |
| Capn3   | 0.1   | 0.1   | 0.1   | 0.1   | 0.1   | 0.0   | 0.1   | 0.0   | 0.0   | 0.0   | 0.1   | 0.1   |
| Capn5   | 5.4   | 5.1   | 5.7   | 4.8   | 3.8   | 5.7   | 4.9   | 6.2   | 4.2   | 3.0   | 4.0   | 4.4   |
| Capn6   | 1.1   | 0.2   | 0.4   | 0.0   | 0.1   | 0.1   | 0.1   | 0.6   | 0.3   | 1.3   | 0.4   | 0.6   |
| Capn7   | 28.4  | 23.8  | 21.8  | 28.9  | 22.7  | 25.6  | 21.7  | 20.0  | 21.0  | 22.1  | 25.7  | 26.3  |
| Capn8   | 0.0   | 0.0   | 0.0   | 0.0   | 0.0   | 0.0   | 0.0   | 0.0   | 0.0   | 0.0   | 0.0   | 0.0   |
| Capn9   | 0.0   | 0.1   | 0.1   | 0.0   | 0.0   | 0.0   | 0.0   | 0.1   | 0.1   | 0.0   | 0.0   | 0.0   |
| Capns1  | 176.9 | 136.8 | 141.7 | 177.8 | 147.0 | 146.5 | 156.3 | 190.4 | 145.1 | 145.9 | 175.0 | 157.7 |
| Capns2  | 0.1   | 0.0   | 0.0   | 0.0   | 0.1   | 0.0   | 0.1   | 0.0   | 0.0   | 0.1   | 0.1   | 0.0   |
| Caprin1 | 93.9  | 81.1  | 89.6  | 106.5 | 89.1  | 88.4  | 101.1 | 95.5  | 84.0  | 91.8  | 109.5 | 108.0 |
| Caprin2 | 1.7   | 2.2   | 2.0   | 1.8   | 1.2   | 2.0   | 1.4   | 1.8   | 1.8   | 1.5   | 2.0   | 2.0   |
| Capza1  | 64.7  | 68.4  | 55.8  | 67.2  | 74.2  | 61.8  | 59.3  | 61.1  | 63.2  | 66.5  | 67.2  | 63.8  |
| Capza2  | 75.4  | 72.4  | 60.3  | 81.7  | 77.7  | 71.0  | 58.1  | 61.2  | 73.2  | 70.8  | 79.7  | 73.8  |
| Capzb   | 81.6  | 71.8  | 77.6  | 85.1  | 86.9  | 74.3  | 85.7  | 80.3  | 71.6  | 84.0  | 90.1  | 95.0  |
| Car10   | 0.0   | 0.0   | 0.0   | 0.0   | 0.0   | 0.0   | 0.0   | 0.0   | 0.0   | 0.0   | 0.0   | 0.0   |
| Car11   | 2.0   | 3.0   | 2.3   | 3.4   | 2.1   | 5.4   | 2.5   | 1.8   | 1.9   | 1.9   | 1.7   | 2.9   |
| Car12   | 0.3   | 0.1   | 0.2   | 0.3   | 0.4   | 0.2   | 0.2   | 0.1   | 0.1   | 0.2   | 0.1   | 0.2   |
| Car13   | 9.8   | 8.5   | 10.8  | 7.6   | 9.9   | 8.8   | 9.9   | 13.2  | 9.1   | 8.2   | 9.3   | 11.9  |
| Car14   | 0.8   | 0.7   | 0.7   | 0.8   | 0.8   | 0.8   | 0.5   | 0.8   | 0.8   | 1.0   | 0.8   | 0.8   |
| Car15   | 0.3   | 0.1   | 0.3   | 0.3   | 0.5   | 0.6   | 0.3   | 0.6   | 0.2   | 0.2   | 0.4   | 0.3   |
| Car4    | 0.1   | 0.0   | 0.0   | 0.0   | 0.0   | 0.0   | 0.0   | 0.1   | 0.0   | 0.0   | 0.0   | 0.0   |
| Car5a   | 0.0   | 0.0   | 0.0   | 0.0   | 0.0   | 0.0   | 0.0   | 0.0   | 0.0   | 0.0   | 0.0   | 0.0   |
| Car5b   | 3.4   | 4.0   | 3.7   | 3.6   | 3.4   | 4.6   | 3.3   | 3.4   | 2.7   | 2.8   | 3.5   | 3.3   |
| Car6    | 3.5   | 0.6   | 0.6   | 4.4   | 0.1   | 3.6   | 1.2   | 0.5   | 0.5   | 0.9   | 1.6   | 1.3   |
| Car7    | 0.3   | 0.3   | 0.3   | 0.2   | 0.2   | 0.5   | 0.1   | 0.3   | 0.2   | 0.1   | 0.5   | 0.2   |
| Car8    | 1.4   | 0.6   | 0.7   | 1.7   | 0.6   | 2.1   | 0.6   | 0.3   | 0.2   | 0.4   | 0.3   | 0.4   |

Online Table 1

|           |       |      |      |       |       |       |      |      |      |       |       |       |
|-----------|-------|------|------|-------|-------|-------|------|------|------|-------|-------|-------|
| Car9      | 0.3   | 0.3  | 0.3  | 0.3   | 0.6   | 0.5   | 0.1  | 0.2  | 0.1  | 0.7   | 0.3   | 0.2   |
| Card10    | 0.2   | 0.4  | 0.5  | 0.1   | 0.3   | 0.1   | 0.5  | 0.9  | 0.9  | 0.4   | 0.3   | 0.4   |
| Card11    | 0.0   | 0.0  | 0.0  | 0.0   | 0.5   | 0.0   | 0.2  | 0.0  | 0.0  | 0.1   | 0.0   | 0.0   |
| Card14    | 0.0   | 0.0  | 0.0  | 0.1   | 0.0   | 0.1   | 0.0  | 0.1  | 0.0  | 0.0   | 0.0   | 0.1   |
| Card6     | 0.7   | 0.7  | 0.8  | 0.8   | 0.7   | 0.8   | 0.8  | 0.4  | 0.5  | 0.6   | 0.6   | 0.6   |
| Card9     | 0.4   | 0.2  | 0.1  | 1.6   | 3.2   | 0.0   | 0.2  | 0.0  | 0.1  | 0.3   | 0.1   | 0.1   |
| Carf      | 2.6   | 2.9  | 2.5  | 1.8   | 2.3   | 2.9   | 1.8  | 2.7  | 2.2  | 2.0   | 2.4   | 2.9   |
| Carhsp1   | 49.8  | 38.3 | 30.9 | 44.6  | 43.0  | 49.1  | 40.2 | 35.1 | 37.6 | 41.4  | 40.8  | 32.7  |
| Carkd     | 43.6  | 40.5 | 39.4 | 43.8  | 38.3  | 44.6  | 39.2 | 32.6 | 38.9 | 42.4  | 40.1  | 41.6  |
| Carm1     | 7.6   | 8.2  | 8.7  | 7.3   | 7.7   | 8.0   | 9.1  | 10.1 | 9.2  | 7.7   | 8.7   | 6.8   |
| Carns1    | 0.7   | 0.7  | 0.7  | 0.6   | 0.6   | 0.8   | 0.6  | 0.6  | 0.7  | 0.6   | 0.4   | 0.5   |
| Cars      | 40.7  | 34.2 | 28.9 | 39.1  | 30.5  | 39.5  | 36.3 | 40.7 | 36.1 | 28.5  | 39.3  | 32.0  |
| Cars2     | 4.9   | 4.9  | 4.4  | 5.3   | 4.9   | 4.0   | 4.4  | 5.1  | 4.6  | 6.2   | 5.2   | 4.2   |
| Casc1     | 0.2   | 0.2  | 0.2  | 0.4   | 0.2   | 0.4   | 0.1  | 0.2  | 0.2  | 0.3   | 0.2   | 0.3   |
| Casc3     | 3.6   | 3.8  | 4.3  | 3.1   | 3.2   | 3.1   | 4.9  | 3.9  | 3.9  | 3.5   | 3.4   | 3.6   |
| Casc4     | 20.4  | 15.9 | 18.2 | 21.9  | 13.7  | 21.4  | 18.6 | 15.9 | 13.6 | 18.2  | 21.5  | 22.3  |
| Casc5     | 0.5   | 1.0  | 1.9  | 0.2   | 1.7   | 0.1   | 1.7  | 0.9  | 1.6  | 0.9   | 1.6   | 1.0   |
| Casd1     | 7.9   | 9.0  | 11.3 | 8.5   | 9.3   | 7.4   | 8.9  | 9.2  | 11.0 | 9.4   | 10.2  | 10.3  |
| Cask      | 8.1   | 8.2  | 8.5  | 7.1   | 7.1   | 6.8   | 10.0 | 9.3  | 10.4 | 7.3   | 9.4   | 9.9   |
| Caskin1   | 0.0   | 0.1  | 0.1  | 0.1   | 0.0   | 0.1   | 0.0  | 0.1  | 0.1  | 0.1   | 0.0   | 0.0   |
| Caskin2   | 3.0   | 3.5  | 3.5  | 2.8   | 3.1   | 3.6   | 4.0  | 4.0  | 3.4  | 3.0   | 3.0   | 2.6   |
| Casp1     | 1.6   | 0.8  | 0.9  | 5.6   | 8.8   | 0.7   | 3.0  | 1.3  | 1.4  | 2.0   | 1.3   | 1.9   |
| Casp12    | 12.5  | 12.6 | 15.5 | 8.7   | 12.1  | 8.4   | 11.0 | 14.9 | 14.3 | 14.9  | 13.0  | 18.4  |
| Casp14    | 0.8   | 0.9  | 0.3  | 0.7   | 0.5   | 0.8   | 0.6  | 0.4  | 0.4  | 0.6   | 0.7   | 0.4   |
| Casp2     | 2.4   | 2.9  | 3.4  | 3.1   | 2.9   | 2.5   | 2.8  | 3.2  | 3.0  | 3.0   | 2.9   | 2.7   |
| Casp3     | 17.8  | 18.9 | 16.5 | 16.4  | 15.8  | 16.8  | 14.0 | 12.5 | 14.2 | 15.2  | 15.3  | 12.9  |
| Casp4     | 20.0  | 16.1 | 22.3 | 14.1  | 23.3  | 11.3  | 15.5 | 11.8 | 14.6 | 13.3  | 12.7  | 21.3  |
| Casp6     | 6.8   | 9.2  | 12.3 | 9.5   | 8.6   | 9.0   | 8.1  | 9.3  | 8.1  | 9.4   | 8.9   | 10.0  |
| Casp7     | 4.0   | 4.6  | 5.7  | 3.6   | 6.2   | 4.0   | 4.9  | 4.8  | 4.5  | 4.6   | 4.3   | 5.1   |
| Casp8     | 15.0  | 13.3 | 13.8 | 15.0  | 16.2  | 12.5  | 17.1 | 13.3 | 13.3 | 15.4  | 17.1  | 15.4  |
| Casp8ap2  | 3.5   | 4.6  | 5.3  | 3.1   | 4.4   | 3.2   | 4.8  | 4.5  | 4.3  | 4.2   | 5.5   | 4.9   |
| Casp9     | 3.6   | 4.8  | 4.8  | 3.7   | 5.1   | 3.8   | 4.7  | 6.0  | 4.8  | 3.7   | 3.4   | 3.5   |
| Casq1     | 0.7   | 0.6  | 0.6  | 1.1   | 0.5   | 0.4   | 0.4  | 0.4  | 0.4  | 0.4   | 0.5   | 0.2   |
| Casq2     | 0.5   | 0.4  | 0.1  | 0.8   | 0.4   | 0.4   | 0.4  | 0.4  | 0.4  | 0.2   | 0.6   | 0.2   |
| Cass4     | 0.1   | 0.2  | 0.1  | 0.2   | 0.2   | 0.3   | 0.1  | 0.1  | 0.1  | 0.1   | 0.1   | 0.1   |
| Cast      | 73.3  | 60.9 | 62.9 | 69.2  | 60.0  | 64.3  | 61.8 | 60.0 | 51.9 | 52.5  | 68.8  | 65.1  |
| Casz1     | 0.0   | 0.0  | 0.1  | 0.1   | 0.1   | 0.0   | 0.1  | 0.1  | 0.0  | 0.1   | 0.1   | 0.0   |
| Cat       | 104.4 | 95.7 | 72.3 | 172.2 | 137.1 | 159.8 | 63.3 | 74.0 | 47.8 | 67.3  | 72.6  | 56.1  |
| Catsper2  | 0.6   | 0.7  | 0.6  | 0.6   | 0.6   | 0.4   | 0.6  | 0.6  | 0.7  | 0.7   | 0.8   | 0.7   |
| Catsper3  | 0.1   | 0.2  | 0.2  | 0.0   | 0.0   | 0.1   | 0.1  | 0.1  | 0.2  | 0.1   | 0.1   | 0.1   |
| Catsperd  | 0.3   | 0.1  | 0.1  | 0.0   | 0.1   | 0.2   | 0.1  | 0.1  | 0.1  | 0.1   | 0.1   | 0.1   |
| Catsperg1 | 0.3   | 0.4  | 0.2  | 0.1   | 0.2   | 0.3   | 0.1  | 0.1  | 0.2  | 0.2   | 0.3   | 0.1   |
| Catsperg2 | 0.1   | 0.1  | 0.1  | 0.0   | 0.1   | 0.1   | 0.1  | 0.0  | 0.1  | 0.1   | 0.1   | 0.1   |
| Cav1      | 125.4 | 69.6 | 63.8 | 58.9  | 57.0  | 67.9  | 87.2 | 94.9 | 77.7 | 181.3 | 170.8 | 120.1 |
| Cav2      | 11.6  | 11.3 | 9.8  | 13.8  | 13.7  | 15.8  | 10.0 | 8.4  | 8.9  | 9.6   | 13.3  | 12.1  |
| Cav3      | 4.1   | 4.4  | 4.5  | 3.5   | 2.6   | 2.8   | 3.3  | 4.3  | 3.8  | 1.2   | 2.2   | 2.6   |
| Cbfa2t2   | 5.2   | 6.1  | 5.8  | 4.8   | 5.1   | 4.8   | 6.1  | 5.6  | 6.4  | 5.5   | 5.1   | 5.7   |
| Cbfa2t3   | 0.0   | 0.0  | 0.0  | 0.0   | 0.0   | 0.0   | 0.0  | 0.0  | 0.0  | 0.0   | 0.0   | 0.0   |
| Cbfb      | 13.8  | 16.8 | 21.5 | 16.4  | 20.4  | 15.8  | 19.2 | 20.1 | 18.4 | 19.0  | 20.4  | 21.6  |
| Cbl       | 2.2   | 2.8  | 2.7  | 2.4   | 3.3   | 2.2   | 3.1  | 2.5  | 2.5  | 2.8   | 2.6   | 2.2   |
| Cblb      | 1.7   | 2.7  | 3.3  | 1.7   | 2.6   | 1.7   | 3.0  | 3.9  | 3.4  | 3.3   | 2.9   | 3.5   |
| Cblc      | 0.1   | 0.0  | 0.0  | 0.0   | 0.0   | 0.0   | 0.0  | 0.0  | 0.0  | 0.0   | 0.0   | 0.0   |
| Cbl11     | 0.6   | 1.0  | 1.4  | 1.1   | 1.3   | 1.2   | 1.2  | 1.2  | 1.2  | 1.2   | 1.3   | 1.1   |
| Cbln3     | 0.0   | 0.0  | 0.0  | 0.0   | 0.0   | 0.0   | 0.1  | 0.0  | 0.0  | 0.0   | 0.0   | 0.0   |
| Cbr1      | 27.4  | 25.3 | 25.8 | 33.2  | 24.3  | 38.3  | 21.5 | 24.0 | 19.8 | 25.2  | 22.6  | 23.9  |
| Cbr2      | 2.8   | 1.4  | 1.5  | 0.2   | 0.8   | 0.4   | 0.9  | 1.5  | 0.6  | 1.1   | 1.7   | 0.5   |
| Cbr3      | 38.1  | 30.1 | 18.9 | 41.3  | 28.6  | 42.4  | 19.2 | 21.3 | 16.2 | 25.3  | 20.2  | 18.1  |

Online Table 1

|          |      |      |      |      |      |      |      |      |      |      |      |      |
|----------|------|------|------|------|------|------|------|------|------|------|------|------|
| Cbr4     | 12.9 | 14.4 | 13.0 | 11.8 | 11.0 | 14.1 | 12.0 | 12.9 | 12.7 | 13.0 | 13.7 | 13.9 |
| Cbs      | 0.6  | 0.8  | 0.8  | 0.2  | 0.7  | 0.4  | 0.5  | 0.5  | 0.5  | 0.5  | 0.4  | 0.6  |
| Cbwd1    | 10.7 | 11.3 | 10.6 | 11.7 | 9.6  | 11.4 | 8.6  | 10.7 | 9.8  | 10.0 | 11.2 | 10.7 |
| Cbx1     | 18.6 | 18.5 | 20.5 | 18.5 | 16.0 | 17.9 | 20.0 | 21.4 | 17.0 | 18.4 | 20.2 | 21.0 |
| Cbx2     | 1.6  | 2.0  | 1.7  | 1.4  | 1.4  | 1.9  | 1.5  | 1.9  | 1.6  | 1.0  | 1.3  | 1.4  |
| Cbx3     | 43.8 | 48.0 | 60.4 | 40.8 | 45.0 | 49.0 | 48.0 | 51.0 | 47.8 | 58.3 | 64.0 | 60.3 |
| Cbx4     | 2.5  | 3.1  | 3.4  | 2.5  | 2.3  | 2.8  | 2.6  | 2.9  | 2.8  | 2.7  | 2.7  | 2.7  |
| Cbx5     | 15.1 | 16.9 | 20.2 | 12.6 | 15.6 | 12.7 | 17.4 | 20.7 | 20.2 | 14.5 | 18.9 | 18.5 |
| Cbx6     | 6.5  | 8.4  | 9.5  | 6.1  | 6.2  | 8.9  | 7.6  | 9.0  | 8.9  | 10.5 | 7.4  | 7.4  |
| Cbx7     | 1.2  | 1.4  | 1.8  | 1.9  | 1.3  | 2.1  | 0.7  | 0.7  | 1.0  | 1.0  | 0.9  | 1.2  |
| Cbx8     | 4.7  | 5.5  | 4.5  | 3.8  | 4.1  | 5.9  | 4.0  | 3.9  | 3.7  | 5.5  | 3.5  | 4.3  |
| Cby1     | 13.3 | 17.0 | 20.1 | 12.3 | 14.3 | 17.8 | 15.8 | 14.4 | 14.8 | 11.6 | 14.0 | 15.0 |
| Cc2d1a   | 5.4  | 6.1  | 6.6  | 5.3  | 5.0  | 6.3  | 6.5  | 5.7  | 6.3  | 5.6  | 6.0  | 5.2  |
| Cc2d1b   | 15.0 | 13.6 | 11.3 | 14.2 | 11.8 | 14.9 | 12.7 | 12.7 | 12.3 | 11.6 | 12.7 | 12.6 |
| Cc2d2a   | 3.3  | 4.2  | 5.3  | 2.7  | 3.3  | 3.8  | 4.1  | 6.0  | 4.0  | 2.9  | 4.1  | 4.0  |
| Ccar1    | 17.6 | 18.1 | 21.0 | 18.3 | 17.7 | 16.1 | 21.0 | 20.9 | 16.2 | 19.7 | 24.1 | 23.8 |
| Ccbe1    | 0.6  | 1.2  | 2.5  | 0.2  | 0.5  | 0.2  | 0.4  | 0.9  | 1.1  | 0.9  | 0.5  | 1.3  |
| Ccbl1    | 1.2  | 1.6  | 1.3  | 1.5  | 1.0  | 1.7  | 1.4  | 1.7  | 1.0  | 1.3  | 1.1  | 0.8  |
| Ccbl2    | 2.0  | 2.5  | 2.7  | 1.4  | 1.8  | 1.8  | 1.8  | 2.5  | 2.5  | 2.2  | 2.1  | 1.8  |
| Ccbp2    | 0.0  | 0.1  | 0.3  | 0.1  | 0.1  | 0.0  | 0.1  | 0.8  | 0.1  | 0.0  | 0.1  | 0.1  |
| Ccdc101  | 3.1  | 3.3  | 3.0  | 4.3  | 3.6  | 3.1  | 2.1  | 2.9  | 2.7  | 2.7  | 2.8  | 2.0  |
| Ccdc102a | 9.8  | 13.1 | 14.4 | 9.8  | 10.8 | 12.0 | 20.3 | 20.3 | 22.1 | 12.4 | 14.7 | 15.1 |
| Ccdc103  | 0.8  | 0.6  | 0.4  | 0.9  | 0.5  | 0.8  | 0.5  | 0.3  | 0.5  | 0.5  | 0.5  | 0.2  |
| Ccdc104  | 43.1 | 36.5 | 41.0 | 52.2 | 35.2 | 41.8 | 38.9 | 32.0 | 29.7 | 38.9 | 47.0 | 45.4 |
| Ccdc105  | 0.1  | 0.1  | 0.1  | 0.1  | 0.1  | 0.1  | 0.0  | 0.0  | 0.1  | 0.0  | 0.0  | 0.1  |
| Ccdc106  | 0.4  | 0.4  | 0.3  | 0.3  | 0.4  | 0.3  | 0.3  | 0.3  | 0.3  | 0.4  | 0.3  | 0.2  |
| Ccdc107  | 28.8 | 24.0 | 21.2 | 27.9 | 24.0 | 27.9 | 26.2 | 20.6 | 27.6 | 28.6 | 25.9 | 26.9 |
| Ccdc109b | 16.2 | 16.2 | 15.4 | 23.5 | 20.3 | 19.2 | 19.2 | 14.8 | 13.7 | 11.9 | 18.1 | 12.9 |
| Ccdc11   | 0.1  | 0.1  | 0.1  | 0.0  | 0.0  | 0.1  | 0.0  | 0.0  | 0.0  | 0.0  | 0.0  | 0.1  |
| Ccdc110  | 0.0  | 0.1  | 0.0  | 0.1  | 0.1  | 0.1  | 0.0  | 0.1  | 0.1  | 0.0  | 0.1  | 0.1  |
| Ccdc111  | 3.2  | 3.6  | 4.0  | 3.3  | 3.1  | 3.1  | 3.6  | 3.1  | 3.1  | 2.5  | 3.3  | 3.3  |
| Ccdc112  | 1.1  | 1.6  | 1.5  | 0.9  | 1.1  | 1.4  | 1.1  | 1.0  | 1.1  | 1.1  | 1.2  | 1.7  |
| Ccdc114  | 0.6  | 0.6  | 0.5  | 0.6  | 0.3  | 0.6  | 0.5  | 0.5  | 0.4  | 0.5  | 0.5  | 0.4  |
| Ccdc115  | 6.7  | 6.6  | 6.5  | 8.5  | 8.2  | 6.4  | 7.5  | 5.9  | 5.9  | 6.5  | 6.9  | 6.4  |
| Ccdc116  | 0.1  | 0.1  | 0.0  | 0.1  | 0.0  | 0.0  | 0.1  | 0.1  | 0.0  | 0.1  | 0.1  | 0.1  |
| Ccdc117  | 6.6  | 8.9  | 7.7  | 6.8  | 7.3  | 6.7  | 6.3  | 5.5  | 6.9  | 7.6  | 6.5  | 7.5  |
| Ccdc12   | 24.8 | 22.6 | 23.3 | 29.0 | 33.5 | 20.4 | 26.8 | 26.3 | 28.7 | 27.4 | 23.8 | 26.2 |
| Ccdc120  | 0.2  | 0.5  | 0.3  | 0.3  | 0.3  | 0.2  | 0.3  | 0.4  | 0.4  | 0.4  | 0.3  | 0.3  |
| Ccdc121  | 0.0  | 0.0  | 0.1  | 0.0  | 0.1  | 0.0  | 0.0  | 0.1  | 0.0  | 0.0  | 0.0  | 0.1  |
| Ccdc122  | 6.1  | 6.6  | 8.3  | 8.1  | 5.9  | 9.4  | 7.5  | 6.2  | 4.8  | 5.0  | 6.8  | 8.3  |
| Ccdc124  | 36.2 | 32.0 | 30.7 | 50.7 | 34.7 | 41.6 | 39.7 | 37.7 | 31.5 | 34.5 | 37.7 | 33.5 |
| Ccdc125  | 0.9  | 0.6  | 0.4  | 0.8  | 0.6  | 0.7  | 0.6  | 0.7  | 0.5  | 0.7  | 0.9  | 0.6  |
| Ccdc126  | 6.0  | 5.5  | 5.0  | 6.1  | 4.8  | 5.8  | 4.5  | 4.0  | 4.5  | 5.2  | 4.9  | 5.7  |
| Ccdc127  | 21.9 | 22.0 | 21.9 | 22.4 | 21.3 | 21.3 | 24.6 | 20.7 | 20.9 | 20.8 | 25.5 | 25.7 |
| Ccdc13   | 0.0  | 0.0  | 0.1  | 0.0  | 0.0  | 0.2  | 0.0  | 0.0  | 0.0  | 0.0  | 0.0  | 0.0  |
| Ccdc130  | 3.9  | 3.4  | 4.0  | 4.5  | 3.3  | 3.8  | 3.7  | 3.3  | 2.8  | 3.1  | 4.0  | 4.0  |
| Ccdc132  | 12.6 | 13.0 | 10.0 | 14.7 | 12.1 | 13.8 | 10.9 | 11.0 | 10.5 | 11.3 | 11.7 | 11.5 |
| Ccdc134  | 5.0  | 4.5  | 3.5  | 5.5  | 4.6  | 4.0  | 5.8  | 6.1  | 5.7  | 4.3  | 5.6  | 4.0  |
| Ccdc135  | 0.0  | 0.0  | 0.0  | 0.1  | 0.0  | 0.0  | 0.0  | 0.0  | 0.0  | 0.0  | 0.0  | 0.0  |
| Ccdc136  | 2.2  | 2.0  | 2.6  | 2.2  | 1.5  | 2.4  | 1.8  | 2.5  | 1.9  | 3.1  | 2.4  | 1.8  |
| Ccdc137  | 7.2  | 5.3  | 5.0  | 9.6  | 5.9  | 6.6  | 7.0  | 5.0  | 5.3  | 6.1  | 7.1  | 7.0  |
| Ccdc138  | 0.4  | 0.9  | 0.8  | 0.5  | 0.6  | 0.8  | 0.4  | 0.6  | 0.5  | 0.5  | 0.7  | 0.7  |
| Ccdc14   | 0.5  | 0.7  | 0.8  | 0.4  | 0.7  | 0.4  | 0.7  | 0.6  | 0.7  | 0.6  | 0.7  | 0.5  |
| Ccdc141  | 0.3  | 0.2  | 0.2  | 0.3  | 0.2  | 0.2  | 0.3  | 0.2  | 0.4  | 1.2  | 0.5  | 0.3  |
| Ccdc142  | 0.9  | 0.7  | 0.8  | 1.1  | 1.2  | 1.2  | 0.9  | 0.7  | 1.0  | 0.7  | 0.7  | 0.8  |
| Ccdc144b | 0.1  | 0.0  | 0.1  | 0.0  | 0.0  | 0.0  | 0.0  | 0.0  | 0.0  | 0.0  | 0.0  | 0.0  |
| Ccdc146  | 0.0  | 0.0  | 0.0  | 0.0  | 0.0  | 0.0  | 0.0  | 0.0  | 0.0  | 0.0  | 0.1  | 0.0  |

Online Table 1

|         |      |      |      |      |      |      |      |      |      |      |      |      |
|---------|------|------|------|------|------|------|------|------|------|------|------|------|
| Ccdc147 | 0.1  | 0.1  | 0.0  | 0.1  | 0.1  | 0.1  | 0.1  | 0.0  | 0.0  | 0.1  | 0.0  | 0.0  |
| Ccdc148 | 0.3  | 0.1  | 0.1  | 0.1  | 0.1  | 0.2  | 0.0  | 0.0  | 0.0  | 0.1  | 0.1  | 0.0  |
| Ccdc149 | 5.4  | 4.6  | 4.2  | 5.1  | 3.5  | 5.4  | 4.3  | 4.3  | 4.5  | 4.8  | 5.6  | 5.5  |
| Ccdc15  | 0.9  | 1.3  | 1.5  | 0.8  | 1.0  | 0.8  | 1.0  | 0.7  | 0.9  | 0.8  | 0.9  | 1.1  |
| Ccdc150 | 0.0  | 0.0  | 0.0  | 0.0  | 0.0  | 0.0  | 0.0  | 0.0  | 0.0  | 0.0  | 0.0  | 0.0  |
| Ccdc151 | 0.2  | 0.3  | 0.4  | 0.3  | 0.3  | 0.5  | 0.1  | 0.2  | 0.2  | 0.2  | 0.2  | 0.2  |
| Ccdc152 | 0.3  | 0.1  | 0.1  | 0.1  | 0.2  | 0.1  | 0.1  | 0.0  | 0.1  | 0.0  | 0.0  | 0.1  |
| Ccdc154 | 0.0  | 0.1  | 0.0  | 0.0  | 0.0  | 0.1  | 0.0  | 0.0  | 0.0  | 0.0  | 0.0  | 0.0  |
| Ccdc155 | 0.0  | 0.1  | 0.1  | 0.0  | 0.1  | 0.2  | 0.0  | 0.0  | 0.1  | 0.1  | 0.1  | 0.0  |
| Ccdc157 | 3.7  | 3.8  | 4.0  | 4.0  | 3.6  | 4.1  | 3.9  | 3.4  | 4.0  | 3.2  | 3.4  | 3.3  |
| Ccdc158 | 0.1  | 0.1  | 0.1  | 0.0  | 0.1  | 0.2  | 0.1  | 0.0  | 0.1  | 0.2  | 0.1  | 0.1  |
| Ccdc159 | 2.1  | 2.8  | 2.8  | 1.8  | 1.8  | 2.9  | 1.9  | 2.6  | 1.8  | 1.4  | 1.8  | 2.2  |
| Ccdc160 | 0.4  | 0.4  | 0.5  | 0.4  | 0.3  | 0.6  | 0.1  | 0.1  | 0.2  | 0.2  | 0.2  | 0.3  |
| Ccdc162 | 0.1  | 0.0  | 0.0  | 0.0  | 0.0  | 0.0  | 0.0  | 0.0  | 0.0  | 0.0  | 0.0  | 0.0  |
| Ccdc163 | 3.3  | 3.4  | 3.2  | 2.8  | 3.4  | 4.0  | 3.1  | 3.7  | 3.3  | 2.2  | 3.6  | 3.1  |
| Ccdc164 | 0.1  | 0.0  | 0.1  | 0.2  | 0.0  | 0.2  | 0.1  | 0.1  | 0.0  | 0.1  | 0.1  | 0.0  |
| Ccdc166 | 0.5  | 0.4  | 0.5  | 0.3  | 0.7  | 0.7  | 0.2  | 0.4  | 0.5  | 0.5  | 0.4  | 0.4  |
| Ccdc167 | 6.6  | 6.8  | 5.8  | 6.2  | 5.7  | 5.8  | 5.2  | 5.6  | 6.0  | 4.8  | 6.0  | 4.9  |
| Ccdc169 | 0.1  | 0.0  | 0.0  | 0.1  | 0.1  | 0.1  | 0.0  | 0.0  | 0.0  | 0.1  | 0.1  | 0.1  |
| Ccdc17  | 1.0  | 1.3  | 1.2  | 0.6  | 0.8  | 0.8  | 1.0  | 1.0  | 1.0  | 0.8  | 1.1  | 0.8  |
| Ccdc170 | 0.1  | 0.1  | 0.2  | 0.1  | 0.2  | 0.2  | 0.1  | 0.1  | 0.2  | 0.1  | 0.1  | 0.1  |
| Ccdc171 | 1.5  | 1.5  | 1.8  | 1.5  | 1.4  | 1.7  | 1.4  | 1.6  | 1.3  | 1.9  | 1.5  | 1.7  |
| Ccdc173 | 1.5  | 1.3  | 1.8  | 1.9  | 1.1  | 1.8  | 0.9  | 1.3  | 0.8  | 0.7  | 1.0  | 1.7  |
| Ccdc174 | 7.5  | 7.8  | 8.5  | 9.2  | 7.4  | 8.6  | 8.2  | 7.1  | 6.5  | 7.2  | 9.2  | 10.3 |
| Ccdc175 | 0.0  | 0.0  | 0.0  | 0.0  | 0.0  | 0.0  | 0.0  | 0.0  | 0.0  | 0.0  | 0.0  | 0.0  |
| Ccdc176 | 0.2  | 0.3  | 0.3  | 0.4  | 0.2  | 0.3  | 0.1  | 0.2  | 0.2  | 0.1  | 0.1  | 0.2  |
| Ccdc18  | 0.4  | 1.0  | 1.6  | 0.2  | 0.8  | 0.4  | 1.1  | 0.6  | 0.8  | 0.6  | 1.2  | 0.8  |
| Ccdc19  | 1.4  | 0.7  | 0.5  | 2.4  | 1.2  | 1.3  | 1.5  | 0.6  | 0.6  | 0.9  | 1.1  | 1.3  |
| Ccdc22  | 6.9  | 6.8  | 6.1  | 7.5  | 8.0  | 7.4  | 5.3  | 6.5  | 6.0  | 6.8  | 5.6  | 5.1  |
| Ccdc23  | 21.8 | 19.7 | 16.1 | 25.9 | 21.3 | 22.8 | 19.0 | 21.6 | 21.6 | 25.3 | 21.8 | 17.8 |
| Ccdc24  | 0.5  | 0.8  | 0.7  | 0.5  | 0.4  | 1.0  | 0.9  | 0.6  | 0.7  | 0.7  | 0.6  | 0.4  |
| Ccdc25  | 17.7 | 16.8 | 16.6 | 19.7 | 14.5 | 17.0 | 16.1 | 17.5 | 14.6 | 13.6 | 18.2 | 17.8 |
| Ccdc27  | 0.0  | 0.0  | 0.0  | 0.1  | 0.0  | 0.0  | 0.0  | 0.1  | 0.0  | 0.0  | 0.0  | 0.0  |
| Ccdc28a | 5.1  | 3.6  | 3.5  | 6.0  | 4.2  | 6.0  | 3.8  | 4.9  | 4.1  | 4.5  | 4.1  | 4.5  |
| Ccdc28b | 5.0  | 6.3  | 8.7  | 5.9  | 5.8  | 7.6  | 7.1  | 5.9  | 7.1  | 4.6  | 5.7  | 6.5  |
| Ccdc3   | 0.1  | 0.0  | 0.1  | 0.1  | 0.2  | 0.1  | 0.2  | 0.1  | 0.0  | 0.1  | 0.1  | 0.0  |
| Ccdc30  | 0.5  | 0.2  | 0.2  | 0.2  | 0.2  | 0.4  | 0.2  | 0.1  | 0.1  | 0.1  | 0.3  | 0.1  |
| Ccdc32  | 8.6  | 9.0  | 8.6  | 10.4 | 8.5  | 9.4  | 9.2  | 8.5  | 8.1  | 9.0  | 9.1  | 9.6  |
| Ccdc34  | 9.3  | 8.2  | 13.2 | 9.9  | 8.5  | 10.0 | 12.4 | 11.4 | 6.8  | 6.1  | 9.9  | 11.4 |
| Ccdc36  | 0.0  | 0.0  | 0.0  | 0.0  | 0.0  | 0.0  | 0.0  | 0.0  | 0.0  | 0.0  | 0.0  | 0.0  |
| Ccdc37  | 1.3  | 1.4  | 1.3  | 1.5  | 0.9  | 2.3  | 1.5  | 1.6  | 1.9  | 1.0  | 1.4  | 1.0  |
| Ccdc38  | 0.0  | 0.1  | 0.0  | 0.0  | 0.1  | 0.1  | 0.1  | 0.1  | 0.1  | 0.2  | 0.2  | 0.1  |
| Ccdc39  | 1.2  | 1.0  | 1.4  | 1.3  | 0.8  | 1.7  | 1.0  | 0.8  | 0.9  | 0.9  | 0.8  | 1.3  |
| Ccdc40  | 0.3  | 0.3  | 0.2  | 0.5  | 0.2  | 0.4  | 0.2  | 0.1  | 0.0  | 0.2  | 0.2  | 0.2  |
| Ccdc41  | 16.7 | 14.3 | 14.6 | 17.6 | 13.8 | 13.0 | 12.8 | 10.8 | 11.0 | 10.2 | 14.2 | 14.2 |
| Ccdc43  | 9.2  | 8.3  | 7.9  | 11.3 | 7.3  | 11.0 | 6.9  | 7.7  | 6.6  | 7.3  | 9.2  | 8.8  |
| Ccdc47  | 45.5 | 38.4 | 40.6 | 48.2 | 32.9 | 42.8 | 40.9 | 36.6 | 33.0 | 35.5 | 43.5 | 45.1 |
| Ccdc50  | 15.2 | 16.2 | 16.6 | 17.4 | 14.9 | 14.4 | 14.1 | 15.5 | 13.6 | 14.7 | 16.7 | 15.3 |
| Ccdc51  | 2.5  | 2.4  | 2.3  | 2.8  | 2.3  | 2.7  | 2.1  | 2.0  | 2.6  | 2.4  | 2.2  | 2.4  |
| Ccdc53  | 41.9 | 44.1 | 41.0 | 38.5 | 31.6 | 36.1 | 31.1 | 35.1 | 35.9 | 37.8 | 42.2 | 41.5 |
| Ccdc55  | 20.8 | 16.1 | 21.0 | 28.8 | 14.9 | 19.0 | 16.7 | 14.4 | 9.4  | 13.8 | 18.1 | 23.0 |
| Ccdc57  | 0.5  | 0.4  | 0.5  | 0.5  | 0.4  | 0.7  | 0.3  | 0.4  | 0.3  | 0.4  | 0.2  | 0.3  |
| Ccdc58  | 18.3 | 16.5 | 15.6 | 13.0 | 14.2 | 18.2 | 14.0 | 12.6 | 14.0 | 15.7 | 19.0 | 16.1 |
| Ccdc59  | 18.2 | 17.6 | 16.1 | 20.2 | 13.9 | 18.8 | 15.3 | 14.0 | 14.4 | 15.3 | 16.4 | 17.4 |
| Ccdc6   | 12.2 | 13.8 | 13.2 | 12.3 | 11.6 | 13.7 | 15.3 | 16.7 | 14.1 | 12.1 | 16.0 | 12.9 |
| Ccdc61  | 2.3  | 2.2  | 2.1  | 2.5  | 2.4  | 2.2  | 3.3  | 2.9  | 2.9  | 2.7  | 2.0  | 2.2  |
| Ccdc62  | 0.3  | 0.3  | 0.3  | 0.3  | 0.3  | 0.6  | 0.4  | 0.4  | 0.4  | 0.2  | 0.5  | 0.4  |

Online Table 1



|         |       |       |       |       |       |       |       |       |       |       |       |       |
|---------|-------|-------|-------|-------|-------|-------|-------|-------|-------|-------|-------|-------|
| Ccdc63  | 0.1   | 0.1   | 0.1   | 0.1   | 0.1   | 0.1   | 0.1   | 0.1   | 0.0   | 0.0   | 0.1   | 0.0   |
| Ccdc64  | 1.2   | 1.2   | 0.8   | 1.3   | 1.0   | 2.1   | 1.1   | 0.9   | 1.0   | 1.2   | 1.0   | 1.0   |
| Ccdc64b | 0.1   | 0.0   | 0.0   | 0.0   | 0.0   | 0.0   | 0.1   | 0.0   | 0.1   | 0.0   | 0.0   | 0.0   |
| Ccdc65  | 1.0   | 0.8   | 0.8   | 1.0   | 0.8   | 1.3   | 0.4   | 0.5   | 0.4   | 0.6   | 0.7   | 0.9   |
| Ccdc66  | 9.0   | 9.2   | 10.9  | 11.7  | 7.9   | 12.0  | 9.7   | 9.5   | 8.4   | 7.2   | 10.6  | 9.7   |
| Ccdc68  | 8.5   | 8.0   | 7.0   | 10.7  | 5.9   | 8.5   | 7.3   | 4.6   | 6.0   | 5.6   | 8.9   | 9.2   |
| Ccdc69  | 0.2   | 0.2   | 0.5   | 0.3   | 0.4   | 0.2   | 0.2   | 0.3   | 0.3   | 0.3   | 0.5   | 0.2   |
| Ccdc71  | 7.7   | 7.3   | 7.4   | 8.8   | 7.5   | 8.1   | 7.9   | 7.6   | 7.8   | 7.5   | 8.0   | 7.6   |
| Ccdc71l | 3.0   | 3.9   | 5.2   | 3.5   | 3.8   | 2.1   | 3.3   | 4.4   | 4.0   | 3.8   | 3.2   | 4.7   |
| Ccdc73  | 0.1   | 0.2   | 0.1   | 0.1   | 0.1   | 0.1   | 0.1   | 0.1   | 0.0   | 0.1   | 0.2   | 0.1   |
| Ccdc74a | 1.0   | 0.8   | 0.8   | 0.8   | 0.8   | 1.6   | 0.8   | 0.8   | 0.3   | 1.0   | 1.0   | 0.7   |
| Ccdc77  | 3.2   | 3.1   | 3.7   | 2.4   | 3.2   | 3.0   | 3.4   | 2.9   | 2.8   | 2.6   | 3.1   | 2.3   |
| Ccdc78  | 0.1   | 0.2   | 0.1   | 0.2   | 0.1   | 0.0   | 0.1   | 0.1   | 0.1   | 0.1   | 0.0   | 0.1   |
| Ccdc79  | 0.3   | 0.5   | 0.3   | 0.4   | 0.3   | 0.4   | 0.2   | 0.2   | 0.3   | 0.3   | 0.3   | 0.3   |
| Ccdc8   | 1.7   | 3.8   | 5.0   | 1.9   | 3.3   | 2.3   | 3.1   | 4.9   | 3.4   | 2.8   | 2.9   | 3.0   |
| Ccdc80  | 354.9 | 369.1 | 544.1 | 317.2 | 333.6 | 251.4 | 525.1 | 762.5 | 634.0 | 446.4 | 525.4 | 591.6 |
| Ccdc81  | 0.1   | 0.0   | 0.1   | 0.0   | 0.0   | 0.0   | 0.0   | 0.0   | 0.0   | 0.1   | 0.0   | 0.0   |
| Ccdc82  | 14.8  | 19.2  | 23.6  | 15.5  | 16.9  | 15.1  | 18.1  | 22.0  | 17.1  | 14.1  | 17.2  | 17.0  |
| Ccdc83  | 0.1   | 0.1   | 0.0   | 0.1   | 0.1   | 0.2   | 0.0   | 0.0   | 0.0   | 0.0   | 0.0   | 0.0   |
| Ccdc84  | 3.5   | 4.2   | 3.6   | 3.6   | 3.5   | 3.3   | 5.1   | 3.8   | 4.1   | 3.6   | 4.8   | 4.6   |
| Ccdc85a | 0.2   | 0.1   | 0.1   | 0.1   | 0.0   | 0.1   | 0.0   | 0.0   | 0.0   | 0.1   | 0.1   | 0.0   |
| Ccdc85b | 2.6   | 2.1   | 1.9   | 3.2   | 2.9   | 3.8   | 2.9   | 2.0   | 2.6   | 4.6   | 2.7   | 2.3   |
| Ccdc85c | 0.5   | 0.5   | 0.9   | 0.3   | 0.4   | 0.4   | 1.2   | 0.8   | 1.0   | 0.7   | 0.4   | 0.6   |
| Ccdc86  | 4.2   | 3.9   | 3.0   | 4.8   | 4.7   | 3.6   | 4.2   | 3.1   | 3.4   | 4.3   | 3.4   | 3.3   |
| Ccdc87  | 0.1   | 0.1   | 0.1   | 0.0   | 0.1   | 0.2   | 0.0   | 0.0   | 0.0   | 0.1   | 0.1   | 0.0   |
| Ccdc88a | 4.4   | 5.2   | 6.7   | 5.4   | 5.6   | 5.8   | 5.4   | 5.4   | 4.8   | 4.8   | 6.2   | 6.1   |
| Ccdc88b | 0.5   | 0.5   | 0.3   | 1.1   | 2.1   | 0.2   | 0.7   | 0.2   | 0.2   | 0.2   | 0.2   | 0.3   |
| Ccdc88c | 0.4   | 0.4   | 0.7   | 0.2   | 0.1   | 0.2   | 0.2   | 0.5   | 0.1   | 0.1   | 0.2   | 0.1   |
| Ccdc89  | 0.7   | 1.0   | 0.7   | 0.9   | 0.5   | 1.1   | 0.6   | 0.8   | 0.7   | 0.4   | 0.5   | 0.6   |
| Ccdc9   | 7.2   | 6.2   | 7.4   | 9.0   | 7.6   | 7.7   | 8.2   | 8.2   | 7.6   | 7.1   | 7.5   | 7.1   |
| Ccdc90a | 4.1   | 3.6   | 3.8   | 4.3   | 4.3   | 3.8   | 3.7   | 4.4   | 3.8   | 3.0   | 3.5   | 3.9   |
| Ccdc90b | 21.3  | 21.9  | 20.5  | 20.8  | 17.4  | 20.6  | 20.8  | 21.7  | 20.3  | 21.6  | 22.6  | 25.9  |
| Ccdc91  | 25.1  | 20.5  | 21.2  | 32.2  | 19.1  | 28.4  | 21.8  | 21.6  | 18.5  | 21.5  | 26.9  | 25.1  |
| Ccdc92  | 1.9   | 1.5   | 1.3   | 1.9   | 1.6   | 1.7   | 1.6   | 1.4   | 1.1   | 2.0   | 1.9   | 1.4   |
| Ccdc93  | 7.5   | 6.7   | 6.9   | 8.2   | 7.4   | 8.1   | 6.5   | 5.9   | 5.8   | 6.7   | 7.0   | 7.0   |
| Ccdc94  | 3.5   | 3.4   | 2.9   | 4.0   | 3.4   | 2.7   | 4.1   | 4.2   | 3.8   | 3.4   | 3.0   | 2.8   |
| Ccdc96  | 0.3   | 0.2   | 0.1   | 0.2   | 0.3   | 0.4   | 0.1   | 0.1   | 0.1   | 0.2   | 0.2   | 0.3   |
| Ccdc97  | 3.2   | 3.7   | 3.9   | 4.2   | 4.2   | 3.6   | 4.4   | 4.3   | 3.5   | 3.8   | 3.5   | 3.5   |
| Cchr1   | 3.5   | 4.5   | 4.7   | 3.0   | 3.5   | 2.9   | 4.3   | 3.7   | 4.3   | 3.9   | 3.7   | 2.9   |
| Ccin    | 0.0   | 0.1   | 0.2   | 0.0   | 0.1   | 0.1   | 0.1   | 0.2   | 0.1   | 0.1   | 0.0   | 0.0   |
| Cck     | 1.0   | 0.3   | 0.1   | 1.4   | 0.2   | 1.2   | 0.0   | 0.0   | 0.2   | 3.0   | 2.0   | 0.8   |
| Ccl11   | 0.0   | 0.1   | 0.3   | 0.0   | 0.5   | 0.0   | 0.0   | 0.2   | 0.1   | 0.1   | 0.1   | 0.0   |
| Ccl12   | 1.2   | 0.0   | 0.1   | 5.6   | 8.4   | 0.0   | 0.2   | 0.1   | 0.2   | 0.6   | 0.0   | 1.1   |
| Ccl17   | 19.0  | 12.2  | 5.5   | 40.1  | 22.5  | 23.9  | 17.7  | 6.0   | 8.6   | 18.6  | 12.6  | 11.9  |
| Ccl19   | 0.1   | 0.3   | 0.9   | 0.1   | 0.5   | 0.0   | 0.1   | 1.0   | 0.2   | 0.1   | 0.0   | 0.1   |
| Ccl2    | 310.4 | 124.7 | 185.5 | 564.4 | 808.5 | 232.0 | 358.7 | 127.5 | 138.8 | 161.7 | 97.5  | 161.4 |
| Ccl20   | 6.5   | 1.5   | 1.7   | 1.6   | 3.6   | 0.2   | 2.4   | 2.0   | 3.1   | 0.8   | 0.9   | 1.4   |
| Ccl21a  | 0.0   | 0.1   | 0.1   | 0.0   | 0.0   | 0.0   | 0.0   | 0.0   | 0.0   | 0.0   | 0.0   | 0.0   |
| Ccl21b  | 0.0   | 0.1   | 0.3   | 0.0   | 0.1   | 0.0   | 0.0   | 0.2   | 0.0   | 0.0   | 0.0   | 0.0   |
| Ccl21c  | 0.0   | 0.3   | 0.1   | 0.0   | 0.0   | 0.0   | 0.0   | 0.0   | 0.0   | 0.0   | 0.0   | 0.0   |
| Ccl25   | 4.0   | 3.7   | 4.1   | 4.9   | 2.8   | 3.7   | 3.3   | 3.2   | 2.6   | 3.6   | 4.1   | 3.9   |
| Ccl27a  | 5.0   | 3.9   | 3.8   | 4.3   | 3.1   | 5.9   | 2.7   | 5.3   | 3.2   | 4.9   | 5.1   | 3.7   |
| Ccl27b  | 0.8   | 0.6   | 0.9   | 0.6   | 0.4   | 0.5   | 0.4   | 0.5   | 0.5   | 0.8   | 0.6   | 0.6   |
| Ccl28   | 0.1   | 0.2   | 0.2   | 0.1   | 0.1   | 0.1   | 0.5   | 0.2   | 0.2   | 0.1   | 0.1   | 0.1   |
| Ccl3    | 4.9   | 0.0   | 0.5   | 34.8  | 86.5  | 0.1   | 18.9  | 0.5   | 2.4   | 7.3   | 2.0   | 7.0   |
| Ccl4    | 1.7   | 0.1   | 0.1   | 16.8  | 39.8  | 0.0   | 5.8   | 0.1   | 1.2   | 3.6   | 0.3   | 2.4   |
| Ccl5    | 3.3   | 1.3   | 0.9   | 14.6  | 11.8  | 8.0   | 1.9   | 0.1   | 0.4   | 0.4   | 0.1   | 0.7   |

Online Table 1

|         |       |       |       |       |       |       |       |       |       |       |       |       |
|---------|-------|-------|-------|-------|-------|-------|-------|-------|-------|-------|-------|-------|
| Ccl6    | 6.6   | 5.3   | 2.6   | 20.4  | 8.5   | 5.5   | 6.5   | 1.5   | 3.0   | 3.2   | 4.8   | 3.0   |
| Ccl7    | 280.1 | 198.4 | 266.5 | 385.4 | 583.3 | 245.2 | 347.6 | 187.7 | 209.6 | 161.9 | 122.7 | 194.3 |
| Ccl8    | 14.9  | 8.3   | 20.2  | 40.9  | 71.5  | 11.6  | 10.6  | 14.9  | 9.2   | 9.1   | 4.3   | 8.3   |
| Ccl9    | 8.2   | 7.8   | 7.9   | 16.1  | 32.3  | 3.2   | 15.2  | 6.0   | 12.3  | 11.3  | 13.9  | 8.7   |
| Ccm2    | 22.3  | 20.2  | 16.6  | 24.9  | 21.1  | 21.6  | 21.4  | 18.1  | 22.3  | 20.0  | 23.1  | 19.1  |
| Ccm2l   | 0.0   | 0.0   | 0.0   | 0.0   | 0.0   | 0.0   | 0.0   | 0.0   | 0.0   | 0.0   | 0.0   | 0.0   |
| Ccna1   | 0.0   | 0.1   | 0.1   | 0.0   | 0.0   | 0.0   | 0.0   | 0.0   | 0.0   | 0.0   | 0.0   | 0.0   |
| Ccna2   | 4.2   | 7.4   | 12.3  | 2.3   | 9.2   | 1.8   | 13.3  | 6.1   | 10.8  | 5.1   | 9.3   | 6.1   |
| Ccnb1   | 3.6   | 7.6   | 11.3  | 1.1   | 10.9  | 1.1   | 15.0  | 4.9   | 12.6  | 5.7   | 11.5  | 7.3   |
| Ccnb2   | 3.6   | 6.3   | 9.7   | 0.8   | 9.9   | 0.9   | 11.7  | 4.0   | 8.4   | 4.4   | 6.4   | 5.8   |
| Ccnb3   | 0.0   | 0.0   | 0.0   | 0.0   | 0.0   | 0.0   | 0.0   | 0.0   | 0.0   | 0.0   | 0.0   | 0.0   |
| Ccnc    | 10.5  | 11.1  | 11.4  | 13.8  | 10.2  | 13.4  | 10.4  | 11.8  | 10.5  | 10.1  | 13.0  | 12.2  |
| Ccnd1   | 186.1 | 72.8  | 35.1  | 269.1 | 129.8 | 271.0 | 83.1  | 19.1  | 21.1  | 56.9  | 57.7  | 33.9  |
| Ccnd2   | 148.8 | 116.2 | 99.4  | 136.1 | 130.0 | 162.5 | 126.6 | 95.5  | 97.0  | 174.8 | 147.6 | 126.3 |
| Ccnd3   | 28.8  | 32.1  | 27.5  | 26.8  | 27.7  | 29.3  | 29.7  | 33.4  | 32.2  | 32.1  | 30.4  | 25.9  |
| Ccndbp1 | 20.3  | 20.2  | 17.4  | 24.2  | 18.8  | 22.2  | 19.0  | 19.6  | 17.9  | 20.8  | 19.0  | 19.5  |
| Ccne1   | 4.5   | 6.4   | 6.9   | 3.7   | 5.7   | 4.8   | 7.7   | 5.8   | 5.2   | 5.0   | 7.3   | 5.5   |
| Ccne2   | 0.9   | 1.6   | 2.9   | 0.8   | 2.3   | 0.4   | 3.1   | 2.1   | 1.8   | 1.6   | 2.1   | 1.6   |
| Ccnf    | 0.8   | 1.7   | 2.3   | 0.8   | 2.6   | 0.7   | 3.2   | 1.4   | 2.5   | 1.3   | 2.0   | 1.6   |
| Ccng1   | 435.6 | 361.8 | 293.7 | 397.4 | 359.4 | 412.0 | 316.6 | 180.7 | 263.8 | 420.2 | 436.6 | 398.8 |
| Ccng2   | 15.2  | 21.6  | 18.8  | 14.1  | 17.6  | 16.4  | 17.1  | 17.0  | 24.3  | 19.9  | 16.3  | 19.2  |
| Ccnh    | 10.6  | 9.2   | 9.9   | 10.4  | 8.3   | 10.0  | 9.4   | 9.7   | 7.8   | 13.6  | 12.8  | 12.2  |
| Ccni    | 34.4  | 31.5  | 31.5  | 34.2  | 29.0  | 40.2  | 31.7  | 30.8  | 34.4  | 32.7  | 32.0  | 31.8  |
| Ccnj    | 1.0   | 0.9   | 1.0   | 1.0   | 0.8   | 1.1   | 0.8   | 1.0   | 1.1   | 1.0   | 0.9   | 1.0   |
| Ccnjl   | 0.0   | 0.0   | 0.0   | 0.0   | 0.0   | 0.0   | 0.0   | 0.1   | 0.0   | 0.0   | 0.0   | 0.0   |
| Ccnk    | 1.4   | 1.8   | 2.4   | 1.9   | 1.8   | 1.3   | 1.6   | 2.2   | 1.7   | 1.5   | 1.9   | 1.4   |
| Ccnl1   | 11.5  | 10.7  | 12.0  | 10.0  | 11.7  | 7.9   | 10.3  | 11.6  | 11.8  | 13.9  | 12.2  | 13.6  |
| Ccnl2   | 15.8  | 18.4  | 21.3  | 11.8  | 14.9  | 11.6  | 16.2  | 16.5  | 21.6  | 17.5  | 15.1  | 16.3  |
| Ccno    | 0.2   | 0.1   | 0.1   | 0.1   | 0.1   | 0.1   | 0.2   | 0.2   | 0.2   | 0.2   | 0.1   | 0.2   |
| Ccnt1   | 10.7  | 10.7  | 11.1  | 12.3  | 11.2  | 10.4  | 10.0  | 9.4   | 8.6   | 10.1  | 10.9  | 9.3   |
| Ccnt2   | 5.9   | 6.7   | 7.4   | 5.7   | 6.5   | 6.8   | 6.6   | 7.0   | 5.9   | 6.8   | 7.1   | 7.1   |
| Ccny    | 23.9  | 24.3  | 24.3  | 25.3  | 21.8  | 24.4  | 23.8  | 28.1  | 25.2  | 23.5  | 23.3  | 24.4  |
| Ccnyl1  | 11.8  | 15.4  | 18.1  | 8.8   | 13.3  | 7.7   | 16.4  | 20.4  | 19.2  | 14.0  | 18.4  | 19.4  |
| Ccp110  | 1.8   | 2.4   | 3.2   | 1.8   | 2.1   | 1.9   | 2.1   | 2.3   | 1.9   | 1.6   | 1.8   | 1.8   |
| Ccpg1   | 35.7  | 26.9  | 31.0  | 40.4  | 27.7  | 36.1  | 27.7  | 28.3  | 24.4  | 30.8  | 31.8  | 36.7  |
| Ccr1    | 0.0   | 0.0   | 0.0   | 0.1   | 0.5   | 0.0   | 0.0   | 0.0   | 0.0   | 0.1   | 0.0   | 0.0   |
| Ccr10   | 0.3   | 0.3   | 0.1   | 0.3   | 0.4   | 0.6   | 0.2   | 0.2   | 0.2   | 0.3   | 0.2   | 0.1   |
| Ccr3    | 0.1   | 0.0   | 0.0   | 0.2   | 0.2   | 0.0   | 0.1   | 0.0   | 0.1   | 0.0   | 0.0   | 0.0   |
| Ccr4    | 0.0   | 0.0   | 0.0   | 0.0   | 0.0   | 0.0   | 0.0   | 0.0   | 0.0   | 0.0   | 0.0   | 0.0   |
| Ccr5    | 0.3   | 0.0   | 0.0   | 2.5   | 5.1   | 0.0   | 0.6   | 0.0   | 0.1   | 0.1   | 0.0   | 0.3   |
| Ccr7    | 0.1   | 0.1   | 0.1   | 0.0   | 0.0   | 0.0   | 0.0   | 0.1   | 0.1   | 0.1   | 0.0   | 0.1   |
| Ccr9    | 0.0   | 0.0   | 0.1   | 0.0   | 0.0   | 0.0   | 0.0   | 0.0   | 0.0   | 0.0   | 0.1   | 0.0   |
| Ccr11   | 3.2   | 4.0   | 4.6   | 1.9   | 2.9   | 1.8   | 2.1   | 3.8   | 1.8   | 4.8   | 5.9   | 3.6   |
| Ccr12   | 0.3   | 0.2   | 0.3   | 0.5   | 0.5   | 0.3   | 0.2   | 0.2   | 0.2   | 0.4   | 0.0   | 0.3   |
| Ccrn4l  | 1.2   | 1.2   | 0.8   | 1.1   | 1.3   | 0.8   | 1.2   | 0.6   | 1.0   | 1.6   | 1.5   | 1.0   |
| Ccs     | 23.5  | 20.2  | 17.7  | 22.0  | 16.6  | 20.9  | 17.4  | 16.4  | 18.9  | 19.6  | 19.0  | 19.6  |
| Ccsap   | 0.5   | 0.4   | 0.7   | 0.7   | 0.9   | 0.5   | 1.2   | 0.8   | 0.8   | 0.8   | 0.6   | 1.0   |
| Ccser1  | 0.1   | 0.0   | 0.0   | 0.0   | 0.0   | 0.1   | 0.0   | 0.0   | 0.0   | 0.1   | 0.0   | 0.1   |
| Ccser2  | 22.2  | 21.9  | 20.4  | 24.4  | 19.2  | 23.0  | 19.4  | 17.4  | 19.2  | 21.7  | 22.6  | 22.8  |
| Cct2    | 167.5 | 137.8 | 125.2 | 151.7 | 133.7 | 143.7 | 136.9 | 129.6 | 126.6 | 145.9 | 153.5 | 148.2 |
| Cct3    | 108.5 | 108.6 | 82.4  | 105.1 | 95.5  | 88.5  | 95.8  | 84.4  | 93.1  | 106.1 | 100.1 | 93.2  |
| Cct4    | 118.5 | 115.7 | 91.3  | 87.2  | 99.4  | 97.6  | 84.2  | 87.3  | 101.5 | 109.8 | 106.4 | 100.0 |
| Cct5    | 173.1 | 146.3 | 128.8 | 157.8 | 137.5 | 154.6 | 146.3 | 134.0 | 130.2 | 155.1 | 164.6 | 144.1 |
| Cct6a   | 128.2 | 125.5 | 97.4  | 132.1 | 103.8 | 109.2 | 113.2 | 96.6  | 105.0 | 113.9 | 132.1 | 119.2 |
| Cct6b   | 0.2   | 0.4   | 0.3   | 0.1   | 0.1   | 0.2   | 0.1   | 0.2   | 0.2   | 0.3   | 0.1   | 0.0   |
| Cct7    | 95.4  | 88.8  | 72.0  | 88.7  | 76.3  | 88.3  | 73.1  | 69.4  | 73.6  | 81.9  | 79.3  | 73.8  |
| Cct8    | 117.7 | 106.5 | 90.9  | 114.0 | 98.7  | 103.6 | 95.3  | 84.1  | 90.1  | 107.1 | 105.5 | 102.2 |

Online Table 1

|         |       |       |       |       |       |       |       |       |       |       |       |       |
|---------|-------|-------|-------|-------|-------|-------|-------|-------|-------|-------|-------|-------|
| Cct8I1  | 0.0   | 0.0   | 0.0   | 0.0   | 0.0   | 0.0   | 0.0   | 0.0   | 0.0   | 0.0   | 0.0   | 0.0   |
| Ccz1    | 41.2  | 38.6  | 34.0  | 38.9  | 35.8  | 39.4  | 34.0  | 34.7  | 34.5  | 35.7  | 39.2  | 37.1  |
| Cd101   | 0.0   | 0.0   | 0.0   | 0.0   | 0.1   | 0.0   | 0.0   | 0.0   | 0.0   | 0.0   | 0.1   | 0.0   |
| Cd109   | 9.8   | 7.8   | 8.4   | 3.3   | 6.8   | 7.5   | 6.4   | 7.7   | 6.6   | 4.6   | 6.9   | 7.6   |
| Cd14    | 2.8   | 0.7   | 0.6   | 19.5  | 54.7  | 0.5   | 8.5   | 1.0   | 1.8   | 5.4   | 1.4   | 2.9   |
| Cd151   | 254.0 | 217.1 | 170.2 | 296.5 | 188.0 | 288.9 | 209.7 | 189.3 | 181.4 | 215.1 | 231.2 | 175.4 |
| Cd160   | 0.0   | 0.1   | 0.1   | 0.0   | 0.1   | 0.1   | 0.2   | 0.1   | 0.1   | 0.1   | 0.2   | 0.2   |
| Cd164   | 46.0  | 44.2  | 47.9  | 60.7  | 51.0  | 56.0  | 52.2  | 46.6  | 48.7  | 54.2  | 57.4  | 55.1  |
| Cd164I2 | 0.0   | 0.0   | 0.0   | 0.0   | 0.1   | 0.0   | 0.1   | 0.1   | 0.2   | 0.0   | 0.1   | 0.1   |
| Cd177   | 0.0   | 0.0   | 0.0   | 0.0   | 0.0   | 0.0   | 0.0   | 0.0   | 0.0   | 0.0   | 0.0   | 0.0   |
| Cd180   | 0.7   | 0.5   | 0.7   | 3.8   | 5.8   | 0.6   | 1.4   | 0.6   | 0.9   | 0.7   | 0.4   | 0.7   |
| Cd1d1   | 1.9   | 2.5   | 2.0   | 2.3   | 2.4   | 2.4   | 0.8   | 2.4   | 1.0   | 2.0   | 1.9   | 1.4   |
| Cd1d2   | 0.1   | 0.2   | 0.0   | 0.1   | 0.1   | 0.1   | 0.1   | 0.1   | 0.0   | 0.1   | 0.1   | 0.1   |
| Cd200   | 6.4   | 4.3   | 7.3   | 4.5   | 2.6   | 4.2   | 3.2   | 3.8   | 4.8   | 9.3   | 8.5   | 11.3  |
| Cd200r1 | 2.3   | 1.8   | 2.6   | 5.6   | 3.4   | 1.8   | 3.5   | 2.7   | 3.9   | 2.7   | 2.7   | 3.3   |
| Cd200r2 | 0.0   | 0.0   | 0.0   | 0.0   | 0.0   | 0.0   | 0.0   | 0.0   | 0.0   | 0.0   | 0.0   | 0.0   |
| Cd200r3 | 0.0   | 0.0   | 0.0   | 0.0   | 0.0   | 0.1   | 0.1   | 0.0   | 0.0   | 0.0   | 0.0   | 0.0   |
| Cd200r4 | 0.4   | 0.3   | 0.5   | 1.0   | 1.2   | 0.5   | 0.5   | 0.4   | 0.6   | 0.4   | 0.4   | 0.3   |
| Cd207   | 0.0   | 0.0   | 0.0   | 0.2   | 1.2   | 0.1   | 0.2   | 0.0   | 0.0   | 0.1   | 0.0   | 0.0   |
| Cd209c  | 0.6   | 1.0   | 0.7   | 0.5   | 0.9   | 0.6   | 0.9   | 0.5   | 0.4   | 0.8   | 0.3   | 0.6   |
| Cd22    | 0.0   | 0.0   | 0.0   | 0.1   | 0.1   | 0.0   | 0.0   | 0.0   | 0.0   | 0.0   | 0.0   | 0.0   |
| Cd244   | 0.2   | 0.1   | 0.0   | 0.8   | 1.5   | 0.0   | 0.3   | 0.1   | 0.1   | 0.2   | 0.2   | 0.4   |
| Cd247   | 0.0   | 0.0   | 0.1   | 0.0   | 0.0   | 0.0   | 0.0   | 0.0   | 0.0   | 0.0   | 0.0   | 0.1   |
| Cd248   | 8.6   | 8.9   | 9.5   | 7.4   | 10.5  | 11.7  | 25.6  | 28.8  | 30.6  | 23.1  | 27.4  | 17.8  |
| Cd24a   | 2.4   | 1.4   | 2.3   | 0.8   | 1.2   | 0.6   | 0.6   | 1.9   | 0.4   | 3.3   | 2.0   | 3.0   |
| Cd27    | 0.0   | 0.2   | 0.1   | 0.0   | 0.0   | 0.0   | 0.0   | 0.2   | 0.0   | 0.1   | 0.1   | 0.0   |
| Cd274   | 1.4   | 1.1   | 1.1   | 1.5   | 0.8   | 1.4   | 0.8   | 0.4   | 0.4   | 0.4   | 0.6   | 0.7   |
| Cd276   | 1.8   | 1.9   | 2.5   | 2.0   | 1.9   | 2.3   | 2.4   | 3.0   | 2.6   | 2.8   | 2.3   | 2.4   |
| Cd28    | 1.2   | 1.4   | 0.6   | 2.0   | 1.1   | 1.5   | 0.4   | 0.1   | 0.3   | 0.1   | 0.2   | 0.1   |
| Cd2ap   | 12.1  | 11.4  | 13.7  | 13.0  | 12.0  | 12.2  | 12.7  | 13.4  | 10.8  | 16.0  | 18.3  | 17.0  |
| Cd2bp2  | 20.0  | 17.1  | 16.3  | 20.2  | 17.7  | 20.7  | 18.4  | 17.6  | 17.4  | 18.2  | 18.7  | 19.6  |
| Cd300a  | 0.2   | 0.0   | 0.0   | 2.2   | 3.0   | 0.0   | 0.3   | 0.1   | 0.0   | 0.2   | 0.0   | 0.1   |
| Cd300e  | 0.1   | 0.0   | 0.0   | 0.5   | 0.6   | 0.0   | 0.5   | 0.0   | 0.1   | 0.1   | 0.0   | 0.2   |
| Cd300Ib | 0.4   | 0.0   | 0.1   | 3.5   | 6.7   | 0.0   | 0.5   | 0.1   | 0.1   | 0.3   | 0.0   | 0.3   |
| Cd300Id | 1.9   | 0.0   | 0.1   | 11.4  | 22.9  | 0.0   | 3.3   | 0.1   | 0.6   | 1.7   | 0.8   | 2.0   |
| Cd300If | 0.2   | 0.0   | 0.0   | 3.1   | 4.7   | 0.0   | 0.7   | 0.0   | 0.1   | 0.2   | 0.2   | 0.4   |
| Cd300Ig | 0.1   | 0.0   | 0.0   | 0.0   | 0.0   | 0.0   | 0.1   | 0.0   | 0.0   | 0.1   | 0.0   | 0.0   |
| Cd300Ih | 0.2   | 0.0   | 0.0   | 1.5   | 2.6   | 0.0   | 0.4   | 0.0   | 0.1   | 0.2   | 0.0   | 0.1   |
| Cd302   | 46.4  | 47.0  | 61.2  | 53.6  | 51.9  | 49.1  | 45.4  | 46.7  | 43.6  | 46.1  | 44.9  | 58.4  |
| Cd320   | 5.2   | 4.3   | 3.5   | 3.7   | 3.7   | 4.2   | 4.1   | 4.8   | 3.9   | 5.0   | 4.2   | 4.1   |
| Cd33    | 0.1   | 0.0   | 0.0   | 0.8   | 1.0   | 0.0   | 0.1   | 0.0   | 0.0   | 0.0   | 0.0   | 0.0   |
| Cd34    | 22.5  | 10.7  | 21.1  | 8.7   | 5.0   | 14.4  | 6.4   | 27.1  | 10.3  | 11.5  | 11.3  | 15.6  |
| Cd36    | 1.7   | 0.2   | 0.2   | 7.5   | 26.0  | 0.0   | 1.5   | 1.0   | 0.6   | 1.9   | 0.5   | 1.5   |
| Cd37    | 0.4   | 0.0   | 0.0   | 2.9   | 4.6   | 0.0   | 0.5   | 0.1   | 0.0   | 0.1   | 0.0   | 0.1   |
| Cd38    | 2.0   | 2.4   | 2.5   | 2.1   | 2.2   | 2.1   | 1.9   | 2.7   | 2.2   | 1.7   | 2.4   | 2.1   |
| Cd3eap  | 11.9  | 8.5   | 8.1   | 15.1  | 10.0  | 9.5   | 12.4  | 8.8   | 7.9   | 11.1  | 13.4  | 12.5  |
| Cd4     | 0.0   | 0.0   | 0.0   | 0.1   | 0.0   | 0.0   | 0.0   | 0.0   | 0.0   | 0.0   | 0.0   | 0.0   |
| Cd40    | 7.0   | 4.1   | 2.8   | 12.2  | 11.1  | 7.6   | 7.9   | 2.4   | 3.7   | 3.7   | 3.2   | 3.4   |
| Cd44    | 22.2  | 15.3  | 18.4  | 35.2  | 41.8  | 24.0  | 37.3  | 18.1  | 18.1  | 29.4  | 26.8  | 24.7  |
| Cd46    | 0.0   | 0.2   | 0.2   | 0.2   | 0.2   | 0.4   | 0.3   | 0.5   | 0.5   | 0.2   | 0.4   | 0.3   |
| Cd47    | 15.6  | 16.7  | 15.7  | 17.2  | 22.7  | 14.1  | 19.2  | 16.8  | 15.5  | 16.3  | 15.1  | 17.1  |
| Cd48    | 1.4   | 0.0   | 0.1   | 11.9  | 16.5  | 0.0   | 2.1   | 0.5   | 0.2   | 1.6   | 0.3   | 0.7   |
| Cd5     | 0.0   | 0.0   | 0.0   | 0.1   | 0.7   | 0.0   | 0.2   | 0.0   | 0.0   | 0.1   | 0.0   | 0.0   |
| Cd52    | 11.6  | 0.0   | 0.8   | 101.0 | 232.0 | 0.1   | 43.1  | 1.7   | 7.2   | 14.9  | 5.9   | 12.9  |
| Cd53    | 2.8   | 0.2   | 0.2   | 14.9  | 22.7  | 0.3   | 2.1   | 0.4   | 0.5   | 2.5   | 0.7   | 1.6   |
| Cd55    | 17.0  | 19.2  | 33.8  | 9.4   | 14.4  | 11.1  | 13.9  | 34.8  | 11.4  | 13.1  | 15.2  | 14.5  |
| Cd59a   | 14.4  | 9.1   | 9.2   | 15.9  | 11.8  | 13.6  | 11.4  | 9.2   | 10.0  | 15.4  | 13.5  | 12.5  |

Online Table 1

|          |       |       |       |       |       |       |       |       |       |       |       |       |
|----------|-------|-------|-------|-------|-------|-------|-------|-------|-------|-------|-------|-------|
| Cd59b    | 0.7   | 0.9   | 0.3   | 0.6   | 0.3   | 0.5   | 0.3   | 0.1   | 0.7   | 0.5   | 0.5   | 0.5   |
| Cd63     | 208.8 | 193.2 | 183.8 | 232.1 | 246.5 | 210.9 | 168.0 | 217.6 | 176.4 | 208.6 | 175.5 | 229.4 |
| Cd68     | 4.6   | 0.8   | 1.3   | 52.0  | 45.5  | 1.2   | 4.1   | 1.9   | 1.2   | 3.7   | 2.2   | 2.6   |
| Cd69     | 0.1   | 0.0   | 0.0   | 0.4   | 4.7   | 0.0   | 2.1   | 0.1   | 0.4   | 0.4   | 0.3   | 0.9   |
| Cd70     | 0.2   | 0.0   | 0.0   | 0.2   | 0.4   | 0.1   | 0.0   | 0.0   | 0.0   | 0.0   | 0.0   | 0.0   |
| Cd72     | 7.0   | 0.8   | 0.9   | 68.0  | 128.9 | 0.4   | 19.2  | 2.0   | 3.7   | 9.1   | 3.6   | 8.5   |
| Cd74     | 0.5   | 0.1   | 0.2   | 1.6   | 5.7   | 0.2   | 0.7   | 0.3   | 0.3   | 0.4   | 0.2   | 0.2   |
| Cd79a    | 0.1   | 0.0   | 0.0   | 0.1   | 0.0   | 0.1   | 0.0   | 0.1   | 0.1   | 0.0   | 0.0   | 0.0   |
| Cd80     | 8.1   | 9.8   | 9.1   | 5.7   | 8.9   | 6.8   | 6.9   | 3.8   | 5.2   | 4.8   | 6.7   | 7.4   |
| Cd81     | 610.7 | 549.0 | 467.2 | 624.6 | 505.5 | 621.8 | 562.7 | 513.0 | 541.5 | 628.0 | 658.3 | 591.1 |
| Cd82     | 15.8  | 15.4  | 14.9  | 13.8  | 13.8  | 15.1  | 15.0  | 19.2  | 11.6  | 14.3  | 13.7  | 15.8  |
| Cd83     | 0.4   | 0.5   | 1.1   | 1.2   | 1.2   | 1.1   | 0.3   | 0.3   | 0.1   | 0.1   | 0.0   | 0.1   |
| Cd84     | 1.1   | 0.1   | 0.2   | 12.4  | 13.5  | 0.0   | 0.7   | 0.3   | 0.1   | 0.6   | 0.3   | 0.5   |
| Cd86     | 0.2   | 0.0   | 0.0   | 1.2   | 2.4   | 0.0   | 0.3   | 0.0   | 0.0   | 0.2   | 0.0   | 0.0   |
| Cd8a     | 0.0   | 0.0   | 0.0   | 0.0   | 0.0   | 0.0   | 0.0   | 0.0   | 0.0   | 0.0   | 0.0   | 0.0   |
| Cd8b1    | 0.0   | 0.0   | 0.0   | 0.0   | 0.0   | 0.0   | 0.0   | 0.0   | 0.0   | 0.0   | 0.0   | 0.0   |
| Cd9      | 52.6  | 29.7  | 44.9  | 58.2  | 76.7  | 45.6  | 42.4  | 58.3  | 43.5  | 47.2  | 58.6  | 62.6  |
| Cd93     | 3.2   | 0.8   | 1.7   | 4.2   | 7.3   | 0.4   | 1.9   | 3.7   | 2.9   | 1.0   | 0.7   | 0.9   |
| Cd96     | 0.1   | 0.1   | 0.1   | 0.0   | 0.0   | 0.0   | 0.0   | 0.1   | 0.0   | 0.0   | 0.0   | 0.0   |
| Cd97     | 19.1  | 20.4  | 15.4  | 18.4  | 21.0  | 15.3  | 23.9  | 19.9  | 26.0  | 19.2  | 21.9  | 19.7  |
| Cd99I2   | 24.8  | 23.5  | 22.9  | 22.8  | 19.9  | 28.4  | 20.3  | 25.0  | 21.2  | 20.1  | 21.6  | 23.2  |
| Cda      | 1.1   | 1.6   | 1.2   | 1.6   | 1.9   | 1.5   | 2.4   | 1.2   | 2.7   | 1.8   | 1.5   | 2.3   |
| Cdadcl1  | 5.6   | 6.8   | 7.3   | 8.5   | 6.6   | 7.7   | 7.5   | 5.9   | 7.5   | 8.2   | 7.0   | 8.1   |
| Cdan1    | 1.6   | 1.8   | 2.0   | 1.3   | 2.0   | 1.4   | 2.3   | 1.8   | 2.0   | 1.6   | 1.5   | 1.7   |
| Cdc123   | 26.9  | 28.2  | 28.0  | 27.0  | 25.6  | 28.2  | 24.9  | 24.6  | 24.8  | 28.1  | 28.3  | 27.3  |
| Cdc14a   | 0.6   | 0.5   | 0.8   | 0.6   | 0.7   | 0.5   | 0.6   | 0.7   | 0.4   | 0.5   | 0.6   | 0.5   |
| Cdc14b   | 5.3   | 5.7   | 4.5   | 4.6   | 4.5   | 5.2   | 4.9   | 4.5   | 5.6   | 4.8   | 5.3   | 4.7   |
| Cdc16    | 40.7  | 40.9  | 43.1  | 36.4  | 35.8  | 38.2  | 41.9  | 44.7  | 43.9  | 42.0  | 44.3  | 43.2  |
| Cdc20    | 4.3   | 9.0   | 11.9  | 1.5   | 12.0  | 1.2   | 17.0  | 6.2   | 13.2  | 5.3   | 10.4  | 7.0   |
| Cdc23    | 18.3  | 19.8  | 20.0  | 17.1  | 17.7  | 17.9  | 19.1  | 18.1  | 19.7  | 18.2  | 18.8  | 18.0  |
| Cdc25a   | 3.8   | 3.6   | 3.6   | 3.9   | 4.1   | 3.7   | 5.0   | 3.2   | 4.0   | 4.2   | 4.2   | 3.8   |
| Cdc25b   | 0.7   | 1.3   | 2.0   | 0.3   | 1.5   | 0.5   | 2.1   | 1.0   | 1.7   | 1.0   | 1.1   | 1.2   |
| Cdc25c   | 0.8   | 1.1   | 1.8   | 0.3   | 1.7   | 0.4   | 2.1   | 0.8   | 1.8   | 0.6   | 1.5   | 0.8   |
| Cdc26    | 24.4  | 16.3  | 16.1  | 19.2  | 18.3  | 17.7  | 14.1  | 20.5  | 19.5  | 21.0  | 20.4  | 17.1  |
| Cdc27    | 14.7  | 16.0  | 16.1  | 14.0  | 14.0  | 13.5  | 15.1  | 16.5  | 15.6  | 16.1  | 17.7  | 18.4  |
| Cdc34    | 39.8  | 32.5  | 24.1  | 41.6  | 34.2  | 37.9  | 28.6  | 30.3  | 30.1  | 36.3  | 31.5  | 28.5  |
| Cdc37    | 44.7  | 40.4  | 36.7  | 61.3  | 44.5  | 54.1  | 44.1  | 42.6  | 35.7  | 42.4  | 40.3  | 42.8  |
| Cdc37I1  | 12.9  | 15.2  | 16.0  | 13.5  | 12.0  | 13.9  | 12.3  | 14.8  | 12.3  | 12.0  | 11.9  | 13.9  |
| Cdc40    | 5.3   | 5.9   | 6.2   | 5.4   | 4.9   | 5.1   | 5.3   | 5.5   | 4.8   | 6.6   | 5.6   | 6.0   |
| Cdc42    | 199.2 | 193.5 | 176.3 | 223.4 | 226.0 | 191.7 | 191.6 | 195.4 | 204.6 | 205.0 | 224.6 | 206.3 |
| Cdc42bpa | 19.3  | 18.6  | 16.1  | 19.4  | 17.3  | 21.2  | 19.9  | 16.3  | 17.5  | 18.2  | 20.2  | 18.3  |
| Cdc42bpb | 18.3  | 18.6  | 18.1  | 17.8  | 17.7  | 18.0  | 22.8  | 19.6  | 20.8  | 17.5  | 18.5  | 17.9  |
| Cdc42bpg | 7.1   | 6.0   | 5.7   | 4.5   | 5.5   | 6.1   | 5.3   | 4.1   | 5.0   | 9.1   | 6.2   | 6.0   |
| Cdc42ep1 | 20.2  | 28.7  | 26.5  | 19.6  | 24.1  | 17.3  | 32.2  | 34.6  | 35.3  | 23.5  | 24.7  | 21.4  |
| Cdc42ep2 | 18.4  | 20.7  | 18.5  | 12.4  | 18.4  | 12.8  | 30.9  | 44.0  | 32.0  | 20.3  | 29.1  | 19.2  |
| Cdc42ep3 | 8.5   | 6.2   | 7.6   | 7.5   | 6.6   | 5.1   | 3.6   | 4.0   | 5.9   | 14.2  | 10.4  | 8.1   |
| Cdc42ep4 | 10.3  | 12.9  | 12.4  | 10.1  | 12.0  | 9.0   | 11.8  | 13.3  | 13.8  | 11.0  | 9.7   | 10.3  |
| Cdc42ep5 | 10.5  | 9.4   | 12.6  | 12.3  | 11.7  | 10.2  | 14.1  | 16.0  | 10.5  | 7.5   | 8.3   | 8.7   |
| Cdc42se1 | 23.4  | 22.6  | 23.3  | 27.4  | 29.2  | 19.9  | 29.9  | 30.0  | 27.8  | 23.5  | 28.7  | 24.1  |
| Cdc42se2 | 17.1  | 14.6  | 10.9  | 19.4  | 19.8  | 16.3  | 12.8  | 12.6  | 13.1  | 11.4  | 12.6  | 12.0  |
| Cdc45    | 2.6   | 3.8   | 6.9   | 1.9   | 4.9   | 1.4   | 5.9   | 3.1   | 4.7   | 2.4   | 3.7   | 3.8   |
| Cdc5I    | 16.1  | 18.2  | 19.5  | 18.1  | 17.6  | 17.3  | 19.1  | 19.0  | 17.3  | 20.6  | 19.1  | 20.6  |
| Cdc6     | 0.6   | 1.0   | 1.9   | 0.2   | 1.7   | 0.3   | 1.7   | 1.2   | 1.4   | 0.9   | 1.3   | 0.7   |
| Cdc7     | 0.6   | 1.0   | 1.1   | 0.7   | 1.4   | 0.7   | 1.0   | 0.9   | 1.2   | 0.8   | 1.2   | 0.6   |
| Cdc73    | 2.6   | 3.1   | 2.8   | 2.4   | 2.9   | 2.9   | 2.9   | 3.2   | 2.6   | 3.5   | 3.0   | 3.7   |
| Cdca2    | 1.0   | 2.3   | 3.6   | 0.6   | 3.2   | 0.6   | 4.1   | 1.9   | 3.2   | 1.4   | 2.6   | 2.2   |
| Cdca3    | 3.9   | 5.9   | 10.6  | 1.7   | 8.8   | 1.0   | 13.1  | 4.9   | 8.6   | 4.1   | 7.5   | 4.6   |

Online Table 1

|          |      |      |      |      |      |      |      |      |      |       |      |      |
|----------|------|------|------|------|------|------|------|------|------|-------|------|------|
| Cdca4    | 7.6  | 9.2  | 8.2  | 6.7  | 8.5  | 7.2  | 9.7  | 7.4  | 9.0  | 8.7   | 7.9  | 7.2  |
| Cdca5    | 0.9  | 1.9  | 2.5  | 0.5  | 2.6  | 0.6  | 3.2  | 1.6  | 2.2  | 1.1   | 1.9  | 1.2  |
| Cdca7    | 1.4  | 2.0  | 2.0  | 0.8  | 2.1  | 0.9  | 1.8  | 1.8  | 1.7  | 1.7   | 2.1  | 1.2  |
| Cdca7l   | 1.0  | 1.2  | 1.4  | 1.0  | 1.6  | 0.8  | 1.3  | 0.7  | 0.8  | 0.7   | 1.0  | 0.7  |
| Cdca8    | 2.3  | 4.4  | 7.6  | 2.0  | 6.6  | 1.7  | 8.8  | 3.9  | 6.3  | 2.9   | 6.1  | 3.8  |
| Cdcp1    | 0.0  | 0.0  | 0.0  | 0.1  | 0.6  | 0.0  | 0.0  | 0.0  | 0.0  | 0.1   | 0.0  | 0.0  |
| Cdh1     | 0.0  | 0.0  | 0.0  | 0.1  | 0.0  | 0.0  | 0.0  | 0.0  | 0.0  | 0.0   | 0.0  | 0.0  |
| Cdh10    | 0.2  | 0.1  | 0.1  | 0.2  | 0.2  | 0.1  | 0.4  | 0.3  | 0.3  | 0.2   | 0.2  | 0.2  |
| Cdh11    | 18.6 | 9.0  | 14.7 | 7.1  | 10.5 | 6.4  | 14.2 | 17.4 | 18.5 | 63.4  | 41.0 | 38.7 |
| Cdh12    | 0.0  | 0.0  | 0.0  | 0.0  | 0.0  | 0.0  | 0.0  | 0.0  | 0.0  | 0.0   | 0.0  | 0.0  |
| Cdh13    | 2.5  | 0.4  | 1.2  | 1.0  | 0.5  | 1.3  | 0.9  | 2.1  | 1.0  | 0.3   | 0.5  | 0.7  |
| Cdh15    | 0.0  | 0.0  | 0.0  | 0.0  | 0.0  | 0.0  | 0.0  | 0.0  | 0.0  | 0.0   | 0.0  | 0.0  |
| Cdh17    | 0.1  | 0.0  | 0.1  | 0.2  | 0.0  | 0.0  | 0.1  | 0.0  | 0.0  | 0.0   | 0.1  | 0.1  |
| Cdh19    | 0.9  | 1.5  | 2.2  | 0.9  | 1.4  | 1.3  | 1.7  | 2.4  | 1.8  | 0.5   | 1.2  | 1.2  |
| Cdh2     | 41.8 | 31.4 | 39.1 | 36.1 | 35.5 | 45.0 | 49.4 | 65.0 | 59.5 | 54.0  | 60.8 | 80.4 |
| Cdh23    | 0.3  | 0.3  | 0.3  | 0.2  | 0.3  | 0.3  | 0.3  | 0.2  | 0.2  | 0.2   | 0.3  | 0.2  |
| Cdh24    | 0.1  | 0.1  | 0.1  | 0.0  | 0.2  | 0.3  | 0.2  | 0.2  | 0.2  | 0.4   | 0.3  | 0.2  |
| Cdh26    | 1.0  | 0.6  | 0.2  | 1.0  | 0.5  | 0.5  | 0.2  | 0.1  | 0.1  | 0.3   | 0.2  | 0.2  |
| Cdh3     | 1.8  | 0.9  | 0.9  | 0.4  | 0.4  | 0.5  | 1.0  | 1.8  | 2.3  | 14.1  | 8.7  | 5.2  |
| Cdh4     | 0.0  | 0.0  | 0.0  | 0.0  | 0.0  | 0.0  | 0.0  | 0.0  | 0.0  | 0.0   | 0.0  | 0.0  |
| Cdh5     | 2.7  | 0.7  | 2.0  | 0.9  | 0.8  | 0.5  | 1.8  | 3.9  | 1.7  | 0.4   | 0.3  | 0.5  |
| Cdh6     | 0.0  | 0.0  | 0.0  | 0.0  | 0.0  | 0.0  | 0.0  | 0.0  | 0.0  | 0.0   | 0.0  | 0.0  |
| Cdhr1    | 0.4  | 0.2  | 0.2  | 0.3  | 0.3  | 0.5  | 0.3  | 0.1  | 0.1  | 0.4   | 0.3  | 0.2  |
| Cdhr3    | 0.0  | 0.0  | 0.0  | 0.1  | 0.2  | 0.0  | 0.1  | 0.0  | 0.0  | 0.0   | 0.0  | 0.1  |
| Cdip1    | 6.3  | 6.3  | 6.1  | 6.7  | 6.2  | 6.6  | 6.7  | 6.3  | 6.5  | 7.0   | 6.6  | 5.9  |
| Cdipt    | 35.4 | 28.2 | 23.5 | 39.5 | 29.6 | 32.9 | 29.9 | 30.0 | 28.9 | 30.7  | 28.6 | 26.4 |
| Cdk1     | 6.3  | 11.6 | 16.6 | 2.7  | 14.6 | 3.6  | 18.4 | 7.6  | 15.7 | 10.1  | 12.9 | 10.3 |
| Cdk10    | 11.4 | 11.1 | 11.5 | 13.9 | 10.6 | 12.4 | 11.4 | 10.6 | 12.6 | 11.3  | 10.4 | 8.7  |
| Cdk11b   | 26.0 | 28.8 | 32.0 | 33.5 | 25.0 | 28.9 | 30.4 | 25.4 | 21.2 | 22.7  | 28.1 | 30.4 |
| Cdk12    | 5.8  | 6.9  | 7.0  | 6.8  | 6.4  | 6.4  | 7.0  | 6.9  | 5.8  | 5.7   | 7.2  | 6.7  |
| Cdk13    | 8.0  | 8.0  | 8.2  | 8.1  | 7.3  | 7.7  | 9.0  | 8.4  | 8.1  | 8.7   | 9.7  | 9.3  |
| Cdk14    | 14.4 | 19.4 | 23.2 | 17.4 | 22.7 | 17.1 | 19.0 | 20.9 | 19.2 | 19.9  | 19.3 | 20.7 |
| Cdk15    | 0.7  | 0.6  | 0.4  | 1.2  | 0.6  | 0.8  | 0.7  | 0.5  | 0.6  | 0.3   | 0.7  | 0.3  |
| Cdk16    | 32.2 | 30.4 | 32.1 | 31.5 | 28.1 | 28.8 | 35.7 | 34.6 | 33.9 | 27.3  | 34.1 | 30.2 |
| Cdk17    | 8.1  | 9.7  | 8.7  | 7.7  | 10.2 | 8.0  | 10.3 | 8.6  | 10.7 | 9.7   | 11.8 | 9.6  |
| Cdk18    | 7.1  | 6.1  | 3.8  | 14.8 | 15.3 | 10.9 | 8.1  | 3.4  | 6.7  | 6.3   | 5.7  | 4.4  |
| Cdk19    | 2.6  | 4.1  | 4.9  | 2.9  | 4.0  | 2.8  | 3.8  | 5.6  | 4.8  | 3.7   | 4.0  | 4.5  |
| Cdk2     | 4.2  | 5.7  | 6.5  | 3.4  | 6.5  | 3.5  | 5.9  | 5.7  | 6.4  | 5.2   | 5.2  | 4.2  |
| Cdk20    | 1.5  | 0.9  | 1.2  | 1.1  | 1.7  | 1.6  | 1.2  | 1.1  | 1.2  | 1.2   | 1.0  | 1.2  |
| Cdk2ap1  | 62.4 | 61.0 | 63.5 | 63.0 | 59.1 | 63.2 | 65.0 | 79.0 | 61.0 | 57.8  | 64.4 | 52.4 |
| Cdk2ap2  | 36.6 | 37.0 | 27.6 | 46.6 | 31.8 | 41.2 | 36.0 | 39.3 | 33.1 | 35.2  | 34.0 | 29.4 |
| Cdk3-ps  | 0.0  | 0.0  | 0.0  | 0.0  | 0.1  | 0.0  | 0.1  | 0.0  | 0.1  | 0.1   | 0.1  | 0.1  |
| Cdk4     | 98.5 | 88.0 | 77.8 | 83.7 | 82.7 | 93.9 | 79.1 | 87.7 | 81.2 | 102.1 | 90.8 | 81.9 |
| Cdk5     | 14.6 | 11.8 | 10.5 | 14.2 | 12.1 | 15.2 | 10.0 | 11.1 | 11.9 | 13.2  | 13.6 | 13.8 |
| Cdk5r1   | 0.3  | 0.2  | 0.2  | 0.3  | 0.3  | 0.4  | 0.2  | 0.2  | 0.3  | 0.3   | 0.2  | 0.3  |
| Cdk5rap1 | 3.8  | 3.6  | 3.5  | 4.1  | 2.8  | 4.4  | 2.7  | 2.7  | 2.8  | 3.5   | 3.2  | 3.7  |
| Cdk5rap2 | 5.9  | 6.1  | 7.9  | 5.7  | 6.1  | 6.0  | 6.2  | 6.3  | 5.0  | 5.1   | 6.0  | 5.8  |
| Cdk5rap3 | 22.9 | 24.3 | 21.9 | 23.2 | 20.2 | 22.9 | 20.3 | 25.3 | 21.8 | 26.7  | 22.7 | 23.5 |
| Cdk6     | 19.9 | 17.6 | 14.6 | 24.5 | 24.3 | 15.3 | 18.4 | 12.4 | 13.7 | 14.2  | 15.7 | 15.5 |
| Cdk7     | 8.1  | 8.1  | 8.0  | 8.6  | 7.3  | 7.8  | 7.7  | 8.9  | 9.3  | 10.1  | 9.5  | 9.8  |
| Cdk8     | 12.3 | 14.6 | 16.8 | 14.7 | 13.3 | 14.8 | 13.3 | 12.0 | 12.0 | 11.9  | 14.2 | 13.1 |
| Cdk9     | 6.1  | 5.9  | 5.9  | 6.8  | 6.6  | 7.5  | 6.6  | 7.8  | 6.9  | 6.7   | 6.3  | 6.4  |
| Cdkal1   | 8.9  | 8.0  | 7.4  | 10.6 | 7.7  | 9.9  | 7.4  | 7.4  | 6.9  | 6.8   | 7.5  | 7.2  |
| Cdkl1    | 0.8  | 1.2  | 0.6  | 1.1  | 1.1  | 0.7  | 0.8  | 0.6  | 1.3  | 1.2   | 1.1  | 0.8  |
| Cdkl2    | 4.2  | 3.2  | 2.8  | 4.2  | 3.7  | 4.7  | 3.4  | 2.9  | 2.8  | 2.7   | 3.4  | 3.3  |
| Cdkl3    | 4.4  | 3.3  | 3.5  | 4.5  | 3.1  | 4.1  | 3.3  | 2.8  | 2.3  | 3.1   | 3.5  | 3.4  |
| Cdkl4    | 0.1  | 0.2  | 0.1  | 0.1  | 0.1  | 0.1  | 0.1  | 0.1  | 0.1  | 0.1   | 0.0  | 0.1  |

Online Table 1

|            |      |      |       |      |      |      |      |      |      |      |      |      |
|------------|------|------|-------|------|------|------|------|------|------|------|------|------|
| Cdkl5      | 1.0  | 1.3  | 1.3   | 0.8  | 0.9  | 1.0  | 0.7  | 1.3  | 0.8  | 0.8  | 0.8  | 0.9  |
| Cdkn1a     | 76.6 | 85.4 | 80.0  | 78.8 | 81.7 | 70.0 | 68.6 | 75.5 | 65.2 | 83.6 | 69.8 | 72.9 |
| Cdkn1b     | 9.9  | 14.1 | 19.0  | 11.1 | 10.8 | 13.8 | 12.5 | 17.5 | 18.0 | 14.6 | 16.2 | 16.7 |
| Cdkn1c     | 0.6  | 0.6  | 0.7   | 1.1  | 0.3  | 0.3  | 0.4  | 0.9  | 0.4  | 0.5  | 0.5  | 0.6  |
| Cdkn2a     | 44.2 | 8.9  | 3.6   | 54.9 | 16.8 | 39.4 | 9.9  | 5.2  | 11.0 | 26.3 | 16.5 | 11.4 |
| Cdkn2aip   | 4.7  | 4.4  | 5.2   | 3.9  | 3.6  | 4.0  | 4.9  | 4.1  | 4.3  | 4.6  | 4.3  | 5.2  |
| Cdkn2aipnl | 5.6  | 4.1  | 4.7   | 6.0  | 7.4  | 4.2  | 5.7  | 5.2  | 4.0  | 4.8  | 6.7  | 5.1  |
| Cdkn2b     | 46.1 | 23.0 | 17.8  | 47.3 | 28.5 | 44.6 | 32.0 | 17.3 | 33.5 | 58.8 | 39.5 | 40.5 |
| Cdkn2c     | 6.3  | 8.1  | 8.4   | 5.6  | 7.6  | 4.9  | 7.8  | 9.0  | 9.6  | 8.1  | 8.4  | 7.7  |
| Cdkn2d     | 5.2  | 8.1  | 9.0   | 4.3  | 7.2  | 5.6  | 9.8  | 5.4  | 10.0 | 6.7  | 7.1  | 6.5  |
| Cdkn3      | 2.3  | 4.0  | 8.2   | 0.5  | 5.1  | 1.1  | 7.7  | 3.1  | 5.3  | 3.8  | 5.5  | 4.6  |
| Cdnf       | 4.3  | 4.1  | 4.3   | 5.4  | 3.1  | 5.4  | 3.6  | 3.2  | 3.1  | 3.5  | 4.7  | 4.7  |
| Cdo1       | 24.1 | 13.4 | 13.8  | 13.2 | 12.0 | 10.2 | 8.8  | 3.1  | 6.0  | 11.2 | 10.1 | 8.7  |
| Cdon       | 7.6  | 6.6  | 10.5  | 3.5  | 6.2  | 2.8  | 6.8  | 9.9  | 8.3  | 12.3 | 9.9  | 9.7  |
| Cdpf1      | 13.2 | 11.3 | 6.9   | 13.3 | 8.8  | 13.2 | 9.1  | 9.2  | 9.4  | 12.1 | 10.8 | 11.3 |
| Cdr2       | 33.8 | 28.3 | 21.7  | 37.8 | 28.2 | 31.6 | 30.8 | 25.9 | 26.9 | 27.6 | 32.7 | 27.4 |
| Cdr2l      | 14.0 | 13.3 | 11.7  | 15.8 | 12.1 | 15.1 | 14.7 | 13.6 | 14.1 | 13.7 | 15.2 | 12.2 |
| Cdrt4      | 0.8  | 0.1  | 0.3   | 0.9  | 0.5  | 0.6  | 0.2  | 0.1  | 0.4  | 0.2  | 0.0  | 0.1  |
| Cds1       | 0.5  | 0.3  | 0.2   | 0.7  | 0.7  | 0.3  | 0.3  | 0.2  | 0.1  | 0.3  | 0.1  | 0.2  |
| Cds2       | 18.5 | 19.9 | 15.8  | 20.2 | 17.4 | 18.4 | 16.7 | 13.0 | 17.5 | 15.8 | 14.8 | 14.9 |
| Cdsn       | 0.0  | 0.1  | 0.1   | 0.1  | 0.1  | 0.1  | 0.1  | 0.1  | 0.0  | 0.2  | 0.2  | 0.1  |
| Cdt1       | 0.7  | 1.6  | 1.9   | 0.5  | 2.3  | 0.5  | 2.2  | 1.4  | 1.6  | 1.5  | 1.3  | 0.9  |
| Cdv3       | 44.5 | 37.6 | 33.5  | 40.2 | 39.8 | 36.6 | 42.1 | 39.3 | 40.1 | 44.4 | 47.6 | 44.4 |
| Cdyl       | 4.1  | 4.1  | 5.2   | 3.7  | 4.3  | 2.9  | 4.2  | 4.5  | 4.1  | 3.5  | 4.6  | 4.3  |
| Cdyl2      | 1.6  | 1.9  | 1.5   | 1.8  | 2.1  | 1.9  | 2.0  | 1.7  | 2.0  | 1.8  | 1.6  | 1.8  |
| Ceacam1    | 0.1  | 0.1  | 0.0   | 0.4  | 0.5  | 0.1  | 0.0  | 0.0  | 0.0  | 0.1  | 0.0  | 0.0  |
| Ceacam16   | 0.0  | 0.0  | 0.0   | 0.0  | 0.1  | 0.1  | 0.0  | 0.0  | 0.0  | 0.0  | 0.0  | 0.0  |
| Ceacam19   | 0.1  | 0.0  | 0.0   | 0.1  | 0.2  | 0.0  | 0.0  | 0.0  | 0.0  | 0.0  | 0.0  | 0.0  |
| Ceacam2    | 0.0  | 0.0  | 0.0   | 0.0  | 0.1  | 0.0  | 0.0  | 0.0  | 0.0  | 0.0  | 0.0  | 0.0  |
| Ceacam20   | 0.0  | 0.0  | 0.0   | 0.1  | 0.0  | 0.0  | 0.1  | 0.0  | 0.0  | 0.0  | 0.0  | 0.0  |
| Cebpa      | 1.8  | 2.2  | 2.8   | 3.3  | 4.2  | 1.9  | 2.3  | 2.6  | 2.4  | 4.5  | 3.1  | 3.8  |
| Cebpb      | 48.2 | 46.0 | 53.9  | 32.5 | 43.4 | 27.9 | 46.1 | 56.3 | 43.2 | 66.5 | 38.5 | 58.6 |
| Cebpd      | 73.0 | 87.1 | 100.5 | 45.2 | 60.7 | 41.5 | 80.1 | 90.4 | 85.9 | 67.0 | 65.1 | 73.9 |
| Cebpg      | 10.4 | 8.6  | 8.2   | 11.0 | 10.3 | 10.3 | 8.6  | 9.6  | 10.2 | 8.4  | 10.9 | 9.0  |
| Cebpz      | 16.4 | 14.8 | 14.6  | 16.0 | 14.6 | 15.5 | 13.9 | 13.3 | 13.1 | 16.3 | 18.5 | 16.3 |
| Cecr2      | 0.0  | 0.0  | 0.0   | 0.0  | 0.0  | 0.0  | 0.0  | 0.0  | 0.0  | 0.0  | 0.0  | 0.0  |
| Cecr5      | 2.4  | 2.7  | 2.5   | 1.6  | 2.4  | 2.0  | 1.7  | 3.1  | 3.4  | 2.2  | 2.1  | 2.5  |
| Cecr6      | 0.0  | 0.0  | 0.0   | 0.0  | 0.0  | 0.0  | 0.0  | 0.0  | 0.0  | 0.0  | 0.0  | 0.0  |
| Cela1      | 1.4  | 0.7  | 0.9   | 1.5  | 1.1  | 1.5  | 0.5  | 1.1  | 0.5  | 0.8  | 0.8  | 0.7  |
| Celf1      | 11.0 | 12.4 | 8.8   | 14.6 | 12.9 | 13.2 | 11.1 | 9.7  | 10.1 | 11.6 | 14.1 | 11.5 |
| Celf2      | 10.7 | 12.5 | 15.1  | 11.8 | 11.9 | 10.6 | 11.0 | 13.0 | 12.5 | 8.4  | 12.1 | 9.4  |
| Celf3      | 0.0  | 0.1  | 0.0   | 0.0  | 0.0  | 0.1  | 0.0  | 0.1  | 0.0  | 0.0  | 0.0  | 0.0  |
| Celf4      | 1.5  | 1.2  | 1.3   | 1.4  | 0.9  | 1.6  | 1.1  | 0.6  | 0.4  | 0.8  | 0.8  | 1.0  |
| Celf5      | 0.7  | 1.0  | 1.0   | 0.9  | 0.9  | 0.9  | 0.7  | 0.3  | 0.5  | 0.6  | 0.5  | 0.6  |
| Celf6      | 0.0  | 0.0  | 0.0   | 0.0  | 0.0  | 0.0  | 0.0  | 0.0  | 0.0  | 0.0  | 0.0  | 0.0  |
| Celsr1     | 0.0  | 0.0  | 0.0   | 0.0  | 0.0  | 0.0  | 0.0  | 0.0  | 0.0  | 0.1  | 0.0  | 0.0  |
| Celsr2     | 0.0  | 0.0  | 0.0   | 0.0  | 0.0  | 0.0  | 0.0  | 0.0  | 0.0  | 0.0  | 0.0  | 0.0  |
| Celsr3     | 0.0  | 0.1  | 0.0   | 0.0  | 0.1  | 0.1  | 0.1  | 0.0  | 0.0  | 0.0  | 0.0  | 0.1  |
| Cend1      | 0.5  | 0.4  | 0.7   | 1.0  | 0.4  | 0.9  | 0.5  | 0.9  | 0.8  | 0.4  | 0.6  | 0.5  |
| Cenpa      | 2.6  | 6.3  | 8.0   | 1.1  | 7.5  | 1.3  | 9.0  | 2.3  | 9.1  | 4.1  | 5.7  | 4.3  |
| Cenpb      | 76.4 | 53.4 | 45.2  | 85.9 | 53.2 | 80.6 | 57.3 | 45.1 | 47.0 | 48.1 | 55.2 | 52.5 |
| Cenpc1     | 8.7  | 9.8  | 9.7   | 7.2  | 8.8  | 8.3  | 10.4 | 9.0  | 9.1  | 8.6  | 10.8 | 11.1 |
| Cenpe      | 1.9  | 3.8  | 6.5   | 0.8  | 5.4  | 0.8  | 6.8  | 2.1  | 4.4  | 2.5  | 4.7  | 3.6  |
| Cenpf      | 1.1  | 2.0  | 4.0   | 0.2  | 3.1  | 0.2  | 4.4  | 1.4  | 3.1  | 1.6  | 3.0  | 2.0  |
| Cenph      | 1.6  | 3.9  | 4.6   | 0.9  | 4.4  | 0.7  | 4.1  | 1.8  | 2.5  | 2.3  | 2.8  | 2.3  |
| Cenpi      | 1.3  | 2.2  | 4.1   | 0.7  | 3.4  | 0.9  | 3.7  | 1.5  | 3.4  | 1.8  | 2.1  | 2.2  |
| Cenpj      | 2.5  | 3.5  | 3.9   | 3.3  | 3.5  | 2.9  | 2.9  | 2.8  | 2.8  | 2.8  | 3.3  | 3.5  |

Online Table 1

|         |      |      |      |      |      |      |      |      |      |      |      |      |
|---------|------|------|------|------|------|------|------|------|------|------|------|------|
| Cenpk   | 2.2  | 4.8  | 4.9  | 1.3  | 3.7  | 2.2  | 4.1  | 3.9  | 3.7  | 2.9  | 3.6  | 3.2  |
| Cenpl   | 1.0  | 1.1  | 1.1  | 1.1  | 1.3  | 0.9  | 1.6  | 1.2  | 1.2  | 0.9  | 1.0  | 1.0  |
| Cenpm   | 1.0  | 1.0  | 2.5  | 0.3  | 2.0  | 0.3  | 2.6  | 1.1  | 1.6  | 0.7  | 1.2  | 1.0  |
| Cenpn   | 1.5  | 2.8  | 3.8  | 1.0  | 3.7  | 1.4  | 5.9  | 2.6  | 3.5  | 1.7  | 2.8  | 2.4  |
| Cenpo   | 1.7  | 2.0  | 2.2  | 1.7  | 2.3  | 1.8  | 2.5  | 2.4  | 2.4  | 2.1  | 1.9  | 2.0  |
| Cenpp   | 1.3  | 2.1  | 2.6  | 0.8  | 2.4  | 0.6  | 2.4  | 0.8  | 2.5  | 1.0  | 1.4  | 0.8  |
| Cenpq   | 3.5  | 5.6  | 8.6  | 3.5  | 4.9  | 4.0  | 6.9  | 6.2  | 6.3  | 4.2  | 6.7  | 5.5  |
| Cenpt   | 5.1  | 5.6  | 5.1  | 4.5  | 5.5  | 3.4  | 5.8  | 4.9  | 6.4  | 3.8  | 4.2  | 3.4  |
| Cenpv   | 4.6  | 3.9  | 3.1  | 4.8  | 3.4  | 6.0  | 3.9  | 3.5  | 3.6  | 3.4  | 3.4  | 4.0  |
| Cenpw   | 1.0  | 1.5  | 1.8  | 0.5  | 1.6  | 0.3  | 1.1  | 0.7  | 1.6  | 1.3  | 1.0  | 1.1  |
| Cep104  | 6.5  | 7.2  | 6.4  | 6.5  | 6.6  | 7.0  | 6.1  | 5.0  | 5.8  | 5.8  | 5.1  | 5.8  |
| Cep110  | 3.1  | 3.6  | 4.5  | 3.3  | 4.3  | 3.0  | 3.9  | 3.3  | 3.7  | 2.6  | 4.0  | 3.2  |
| Cep112  | 0.4  | 0.8  | 1.0  | 0.5  | 0.3  | 0.8  | 0.7  | 0.7  | 0.6  | 0.4  | 0.7  | 0.6  |
| Cep120  | 8.7  | 9.8  | 9.4  | 9.8  | 8.7  | 8.1  | 9.3  | 8.0  | 8.7  | 8.4  | 9.7  | 8.9  |
| Cep128  | 1.0  | 1.6  | 2.2  | 0.8  | 2.2  | 0.9  | 1.6  | 1.1  | 1.4  | 0.9  | 1.2  | 1.2  |
| Cep135  | 2.0  | 2.2  | 2.0  | 2.2  | 2.0  | 1.6  | 2.1  | 1.7  | 1.8  | 2.3  | 2.4  | 1.9  |
| Cep152  | 1.1  | 1.5  | 1.4  | 1.5  | 1.6  | 1.4  | 1.5  | 1.3  | 1.4  | 1.0  | 1.5  | 1.0  |
| Cep164  | 8.8  | 8.6  | 7.8  | 9.8  | 8.6  | 9.2  | 8.5  | 6.5  | 8.0  | 7.7  | 8.8  | 7.4  |
| Cep170  | 14.5 | 16.0 | 16.0 | 16.3 | 14.7 | 15.6 | 16.6 | 15.3 | 14.5 | 12.3 | 17.1 | 14.9 |
| Cep170b | 12.9 | 15.3 | 13.6 | 12.9 | 13.3 | 14.9 | 13.9 | 10.5 | 11.8 | 13.6 | 11.7 | 11.1 |
| Cep19   | 8.4  | 8.6  | 8.6  | 8.5  | 6.4  | 9.9  | 7.4  | 7.7  | 6.7  | 7.4  | 7.4  | 7.9  |
| Cep192  | 5.7  | 7.6  | 7.0  | 6.1  | 7.6  | 6.8  | 6.8  | 5.2  | 6.0  | 5.5  | 6.5  | 5.4  |
| Cep250  | 6.8  | 6.0  | 5.8  | 10.3 | 9.0  | 8.2  | 8.6  | 5.2  | 5.5  | 5.6  | 6.1  | 6.3  |
| Cep290  | 4.0  | 3.5  | 4.0  | 4.1  | 3.4  | 4.2  | 3.0  | 2.7  | 2.4  | 3.4  | 4.1  | 3.5  |
| Cep350  | 5.1  | 6.0  | 6.5  | 5.5  | 5.8  | 5.4  | 6.3  | 5.8  | 5.5  | 5.1  | 6.0  | 6.4  |
| Cep44   | 5.6  | 6.8  | 7.5  | 4.6  | 6.5  | 6.2  | 5.0  | 5.4  | 6.0  | 5.4  | 6.6  | 6.0  |
| Cep55   | 1.2  | 3.1  | 6.1  | 0.8  | 5.3  | 0.7  | 6.2  | 2.2  | 4.4  | 2.2  | 4.0  | 2.7  |
| Cep57   | 6.8  | 6.5  | 6.9  | 6.5  | 5.7  | 6.6  | 6.2  | 5.4  | 5.4  | 7.3  | 7.4  | 6.7  |
| Cep57l1 | 2.2  | 2.8  | 3.1  | 2.0  | 2.4  | 2.5  | 3.5  | 2.8  | 2.6  | 2.3  | 3.0  | 2.5  |
| Cep63   | 12.4 | 10.3 | 9.9  | 12.1 | 7.9  | 12.6 | 10.7 | 9.1  | 8.1  | 10.0 | 10.7 | 11.2 |
| Cep68   | 4.0  | 4.6  | 4.3  | 3.9  | 4.0  | 4.2  | 4.3  | 4.8  | 4.9  | 5.0  | 4.8  | 4.1  |
| Cep70   | 1.6  | 1.5  | 1.8  | 1.2  | 1.8  | 1.7  | 1.3  | 1.5  | 1.2  | 1.4  | 2.0  | 1.7  |
| Cep72   | 0.7  | 1.0  | 0.9  | 0.6  | 0.8  | 0.5  | 0.9  | 0.6  | 0.8  | 0.5  | 0.7  | 0.5  |
| Cep76   | 1.8  | 2.6  | 2.3  | 2.1  | 2.0  | 1.8  | 2.4  | 1.7  | 1.8  | 2.2  | 2.3  | 2.4  |
| Cep78   | 3.1  | 3.6  | 3.9  | 3.5  | 3.4  | 3.6  | 3.0  | 2.9  | 3.0  | 2.5  | 3.2  | 3.0  |
| Cep85   | 2.1  | 2.6  | 3.6  | 2.0  | 2.8  | 1.8  | 3.1  | 3.0  | 3.1  | 2.5  | 2.9  | 3.0  |
| Cep85l  | 1.3  | 1.6  | 1.5  | 1.5  | 1.5  | 1.2  | 1.5  | 1.5  | 1.2  | 1.4  | 1.6  | 1.7  |
| Cep89   | 3.1  | 3.2  | 4.0  | 2.7  | 2.7  | 3.0  | 2.6  | 3.1  | 2.9  | 2.7  | 3.0  | 2.9  |
| Cep95   | 3.6  | 4.2  | 5.2  | 2.3  | 3.2  | 2.9  | 4.0  | 4.4  | 3.6  | 3.7  | 4.8  | 5.1  |
| Cep97   | 2.5  | 3.0  | 2.2  | 2.5  | 1.9  | 2.6  | 1.6  | 2.6  | 1.8  | 1.9  | 2.4  | 2.1  |
| Cept1   | 11.0 | 12.5 | 11.9 | 11.8 | 14.2 | 12.4 | 11.1 | 10.0 | 14.4 | 16.9 | 15.3 | 15.1 |
| Cercam  | 12.7 | 14.7 | 16.3 | 13.0 | 11.7 | 18.7 | 12.8 | 16.1 | 13.1 | 11.8 | 10.7 | 12.1 |
| Cerk    | 4.0  | 3.1  | 2.5  | 6.3  | 5.9  | 3.2  | 3.8  | 3.3  | 3.6  | 5.0  | 3.6  | 3.3  |
| Cerkl   | 2.0  | 2.1  | 2.2  | 1.5  | 1.6  | 1.8  | 1.5  | 2.1  | 1.1  | 0.6  | 1.2  | 1.1  |
| Cers1   | 0.6  | 0.4  | 0.5  | 0.3  | 0.2  | 0.9  | 0.3  | 0.3  | 0.3  | 0.5  | 0.1  | 0.5  |
| Cers2   | 55.1 | 49.5 | 48.1 | 62.1 | 60.8 | 50.5 | 64.0 | 53.3 | 61.6 | 53.6 | 58.8 | 50.9 |
| Cers3   | 0.0  | 0.0  | 0.0  | 0.0  | 0.0  | 0.1  | 0.0  | 0.0  | 0.0  | 0.1  | 0.0  | 0.0  |
| Cers4   | 6.2  | 4.4  | 4.1  | 5.6  | 4.0  | 5.1  | 6.2  | 4.6  | 4.7  | 4.3  | 5.2  | 4.8  |
| Cers5   | 30.6 | 25.9 | 22.8 | 30.0 | 30.2 | 27.1 | 33.9 | 26.2 | 32.6 | 31.7 | 30.9 | 28.7 |
| Cers6   | 28.8 | 35.2 | 35.5 | 28.7 | 33.3 | 26.3 | 37.1 | 29.5 | 33.8 | 26.4 | 28.5 | 31.3 |
| Ces1a   | 0.1  | 0.3  | 0.1  | 0.1  | 0.2  | 0.3  | 0.1  | 0.4  | 0.1  | 0.2  | 0.1  | 0.2  |
| Ces1d   | 1.3  | 2.0  | 3.8  | 0.7  | 1.2  | 1.1  | 0.2  | 0.8  | 0.2  | 0.1  | 0.4  | 0.1  |
| Ces1f   | 0.0  | 0.0  | 0.0  | 0.0  | 0.1  | 0.1  | 0.0  | 0.0  | 0.0  | 0.0  | 0.0  | 0.0  |
| Ces1g   | 0.4  | 0.2  | 0.3  | 0.4  | 0.5  | 0.5  | 0.0  | 0.1  | 0.0  | 0.1  | 0.1  | 0.1  |
| Ces2a   | 0.0  | 0.0  | 0.0  | 0.0  | 0.0  | 0.0  | 0.0  | 0.0  | 0.0  | 0.0  | 0.0  | 0.0  |
| Ces2b   | 0.1  | 0.2  | 0.2  | 0.1  | 0.1  | 0.1  | 0.0  | 0.0  | 0.0  | 0.0  | 0.0  | 0.0  |
| Ces2c   | 0.2  | 0.1  | 0.1  | 0.4  | 0.2  | 0.1  | 0.1  | 0.0  | 0.0  | 0.0  | 0.0  | 0.0  |

Online Table 1

|          |       |       |       |       |       |       |       |       |       |       |       |       |
|----------|-------|-------|-------|-------|-------|-------|-------|-------|-------|-------|-------|-------|
| Ces2d-ps | 0.0   | 0.0   | 0.0   | 0.1   | 0.0   | 0.0   | 0.0   | 0.0   | 0.0   | 0.0   | 0.0   | 0.0   |
| Ces2e    | 33.5  | 22.0  | 16.2  | 13.0  | 19.8  | 10.5  | 9.0   | 1.8   | 3.2   | 8.0   | 5.8   | 6.3   |
| Ces2f    | 0.3   | 0.4   | 0.2   | 0.3   | 0.5   | 0.1   | 0.1   | 0.0   | 0.0   | 0.2   | 0.1   | 0.1   |
| Ces2g    | 12.1  | 11.5  | 9.5   | 10.6  | 11.6  | 10.5  | 9.3   | 5.8   | 5.0   | 7.6   | 6.5   | 5.6   |
| Cetn2    | 27.0  | 24.2  | 25.8  | 26.3  | 20.3  | 30.0  | 22.9  | 26.4  | 20.3  | 21.6  | 30.3  | 28.5  |
| Cetn3    | 45.5  | 39.3  | 47.7  | 53.6  | 40.5  | 41.2  | 46.2  | 46.7  | 40.7  | 41.8  | 54.9  | 55.1  |
| Cetn4    | 4.8   | 3.7   | 5.0   | 4.2   | 4.4   | 5.8   | 4.6   | 2.2   | 2.9   | 5.0   | 5.0   | 5.5   |
| Cfb      | 1.9   | 1.4   | 2.2   | 2.2   | 3.2   | 0.4   | 0.6   | 0.8   | 0.3   | 1.0   | 0.5   | 0.9   |
| Cfdp1    | 72.7  | 66.1  | 81.4  | 90.8  | 59.4  | 74.8  | 77.8  | 73.3  | 59.4  | 68.9  | 88.7  | 94.8  |
| Cfh      | 107.1 | 130.6 | 143.6 | 40.6  | 64.0  | 33.4  | 47.5  | 60.1  | 89.6  | 95.5  | 56.8  | 123.4 |
| Cfhr1    | 0.0   | 0.0   | 0.1   | 0.0   | 0.0   | 0.0   | 0.0   | 0.0   | 0.0   | 0.0   | 0.0   | 0.0   |
| Cfhr2    | 19.4  | 21.6  | 23.1  | 6.2   | 11.0  | 5.8   | 8.1   | 9.6   | 15.8  | 15.2  | 8.6   | 19.1  |
| Cfi      | 10.0  | 15.5  | 15.9  | 9.2   | 13.1  | 4.6   | 7.4   | 9.4   | 6.8   | 4.8   | 4.1   | 7.6   |
| Cfl1     | 359.7 | 294.7 | 254.3 | 460.7 | 422.1 | 348.8 | 418.3 | 359.6 | 334.4 | 378.3 | 428.4 | 349.2 |
| Cfl2     | 43.4  | 37.0  | 32.0  | 45.6  | 32.5  | 44.0  | 34.1  | 26.2  | 36.9  | 40.7  | 42.5  | 40.8  |
| Cflar    | 49.1  | 40.7  | 35.4  | 66.5  | 44.2  | 62.4  | 43.6  | 24.2  | 27.9  | 36.5  | 39.0  | 37.1  |
| Cfp      | 3.5   | 0.7   | 0.9   | 28.3  | 60.5  | 0.5   | 8.7   | 1.2   | 2.2   | 4.8   | 1.8   | 2.9   |
| Cfr      | 0.0   | 0.0   | 0.0   | 0.0   | 0.0   | 0.0   | 0.0   | 0.0   | 0.0   | 0.0   | 0.0   | 0.0   |
| Cggbp1   | 16.1  | 18.4  | 18.8  | 18.4  | 19.8  | 16.7  | 19.5  | 20.6  | 21.5  | 19.7  | 22.7  | 20.6  |
| Cgn      | 0.2   | 0.2   | 0.1   | 0.1   | 0.1   | 0.1   | 0.1   | 0.1   | 0.2   | 0.8   | 0.6   | 0.2   |
| Cgnl1    | 14.6  | 7.3   | 6.6   | 16.2  | 8.8   | 16.0  | 3.8   | 3.0   | 2.1   | 3.8   | 2.9   | 3.0   |
| Cgref1   | 21.3  | 16.9  | 12.8  | 19.3  | 12.4  | 20.8  | 14.3  | 11.6  | 8.8   | 8.9   | 14.1  | 14.7  |
| Cgrrf1   | 29.4  | 30.9  | 24.9  | 28.9  | 24.6  | 32.6  | 27.8  | 23.8  | 23.1  | 27.4  | 27.5  | 28.8  |
| Ch25h    | 6.9   | 4.9   | 6.1   | 12.6  | 28.6  | 4.2   | 9.2   | 3.4   | 5.1   | 10.1  | 4.1   | 8.1   |
| Chac1    | 12.8  | 7.1   | 4.5   | 11.4  | 4.7   | 12.0  | 4.4   | 7.2   | 7.4   | 8.5   | 9.1   | 4.9   |
| Chac2    | 3.1   | 3.5   | 4.0   | 4.6   | 4.1   | 4.0   | 4.3   | 3.8   | 3.9   | 3.4   | 4.7   | 4.2   |
| Chad     | 0.0   | 0.1   | 0.1   | 0.2   | 0.1   | 0.1   | 0.1   | 0.2   | 0.0   | 0.0   | 0.1   | 0.0   |
| Chadl    | 0.6   | 0.5   | 0.4   | 0.6   | 0.4   | 0.6   | 0.4   | 0.3   | 0.6   | 0.3   | 0.3   | 0.5   |
| Chaf1a   | 4.1   | 5.3   | 6.5   | 3.1   | 5.8   | 3.0   | 7.7   | 4.4   | 4.9   | 3.4   | 5.2   | 3.7   |
| Chaf1b   | 1.8   | 3.3   | 4.2   | 2.0   | 3.9   | 1.5   | 4.8   | 2.6   | 3.3   | 2.2   | 3.4   | 2.1   |
| Chchd1   | 47.7  | 44.5  | 43.7  | 50.8  | 44.2  | 52.8  | 43.1  | 38.3  | 35.1  | 43.7  | 43.2  | 46.1  |
| Chchd10  | 2.0   | 0.6   | 0.7   | 3.8   | 0.7   | 3.0   | 0.3   | 0.7   | 0.5   | 2.1   | 1.2   | 0.3   |
| Chchd2   | 148.8 | 151.8 | 113.0 | 127.9 | 132.8 | 128.1 | 92.2  | 109.2 | 126.8 | 154.9 | 119.8 | 126.5 |
| Chchd3   | 41.4  | 33.9  | 35.7  | 40.5  | 30.8  | 39.5  | 35.4  | 39.3  | 34.1  | 33.1  | 42.2  | 35.8  |
| Chchd4   | 9.2   | 6.6   | 5.4   | 9.5   | 9.7   | 9.9   | 6.1   | 5.7   | 6.5   | 8.6   | 8.0   | 7.4   |
| Chchd5   | 6.2   | 4.6   | 6.6   | 7.5   | 5.8   | 8.5   | 5.9   | 6.6   | 6.2   | 6.2   | 6.6   | 6.4   |
| Chchd6   | 7.7   | 7.3   | 5.9   | 8.7   | 5.9   | 9.9   | 5.6   | 4.9   | 5.4   | 5.4   | 6.4   | 5.6   |
| Chchd7   | 19.5  | 16.0  | 14.6  | 20.5  | 11.8  | 16.2  | 13.4  | 14.1  | 13.1  | 12.5  | 13.3  | 15.0  |
| Chd1     | 9.3   | 9.9   | 10.9  | 9.0   | 9.7   | 8.2   | 10.7  | 8.9   | 9.3   | 10.5  | 11.0  | 11.0  |
| Chd1l    | 2.5   | 2.0   | 2.3   | 2.9   | 2.2   | 2.7   | 2.2   | 2.4   | 1.9   | 2.2   | 2.1   | 1.9   |
| Chd2     | 8.4   | 8.3   | 9.6   | 8.4   | 7.2   | 8.6   | 8.8   | 7.8   | 6.9   | 7.4   | 9.0   | 9.7   |
| Chd3     | 20.9  | 19.6  | 18.2  | 26.1  | 19.8  | 22.7  | 23.2  | 21.1  | 24.3  | 23.1  | 25.6  | 26.6  |
| Chd4     | 35.6  | 36.1  | 38.8  | 34.6  | 35.4  | 32.7  | 42.0  | 39.2  | 38.6  | 37.6  | 40.7  | 41.7  |
| Chd5     | 0.6   | 0.3   | 0.2   | 0.9   | 0.3   | 0.7   | 0.3   | 0.2   | 0.2   | 0.2   | 0.2   | 0.3   |
| Chd6     | 7.4   | 7.3   | 7.0   | 7.8   | 6.1   | 7.3   | 6.7   | 6.0   | 5.9   | 6.1   | 6.7   | 6.9   |
| Chd7     | 0.5   | 0.4   | 0.4   | 0.6   | 0.8   | 0.3   | 0.6   | 0.4   | 0.4   | 0.3   | 0.4   | 0.3   |
| Chd8     | 9.7   | 12.1  | 12.5  | 10.2  | 11.5  | 10.1  | 12.0  | 11.9  | 11.3  | 11.2  | 12.1  | 11.5  |
| Chd9     | 4.1   | 4.6   | 4.8   | 4.2   | 4.4   | 3.9   | 5.0   | 4.7   | 4.3   | 4.3   | 4.8   | 5.3   |
| Chdh     | 0.0   | 0.0   | 0.0   | 0.0   | 0.0   | 0.0   | 0.0   | 0.0   | 0.0   | 0.0   | 0.0   | 0.0   |
| Chek1    | 0.6   | 0.9   | 1.1   | 0.4   | 1.1   | 0.4   | 1.0   | 1.0   | 0.9   | 0.7   | 0.9   | 0.8   |
| Chek2    | 6.4   | 6.7   | 7.4   | 5.7   | 7.5   | 5.2   | 4.9   | 4.6   | 5.1   | 5.7   | 5.9   | 5.9   |
| Cherp    | 2.6   | 3.5   | 3.7   | 3.2   | 3.8   | 3.2   | 4.2   | 3.6   | 3.6   | 2.9   | 3.0   | 2.7   |
| Chfr     | 17.9  | 21.7  | 21.4  | 13.2  | 14.3  | 11.5  | 18.2  | 21.7  | 23.0  | 13.5  | 19.0  | 18.4  |
| Chga     | 0.1   | 0.1   | 0.1   | 0.1   | 0.0   | 0.0   | 0.0   | 0.0   | 0.1   | 0.0   | 0.0   | 0.1   |
| Chgb     | 0.3   | 0.3   | 0.2   | 0.1   | 0.2   | 0.4   | 0.3   | 0.1   | 0.2   | 0.1   | 0.3   | 0.3   |
| Chi3l1   | 0.3   | 0.3   | 0.8   | 0.0   | 0.1   | 0.1   | 0.0   | 0.9   | 0.2   | 0.3   | 0.5   | 0.5   |
| Chic1    | 0.8   | 0.8   | 1.1   | 0.8   | 0.7   | 1.0   | 0.5   | 0.7   | 0.7   | 0.9   | 0.8   | 0.9   |

Online Table 1



|         |       |       |       |       |       |       |       |       |      |       |       |       |
|---------|-------|-------|-------|-------|-------|-------|-------|-------|------|-------|-------|-------|
| Chic2   | 24.0  | 23.3  | 22.6  | 23.0  | 26.8  | 21.8  | 27.4  | 21.7  | 24.1 | 33.1  | 27.7  | 27.6  |
| Chid1   | 37.0  | 29.6  | 23.0  | 34.8  | 27.6  | 33.6  | 25.5  | 21.8  | 25.3 | 32.0  | 28.7  | 30.8  |
| Chit1   | 0.1   | 0.1   | 0.0   | 0.0   | 0.0   | 0.0   | 0.3   | 0.0   | 0.0  | 0.0   | 0.0   | 0.0   |
| Chka    | 3.2   | 3.5   | 2.8   | 2.6   | 3.2   | 3.0   | 3.5   | 3.0   | 3.3  | 4.0   | 3.2   | 2.5   |
| Chkb    | 7.5   | 7.1   | 7.0   | 7.1   | 8.2   | 7.3   | 7.9   | 7.0   | 9.2  | 8.2   | 6.5   | 7.3   |
| Chl1    | 0.1   | 0.0   | 0.0   | 0.0   | 0.0   | 0.0   | 0.0   | 0.0   | 0.0  | 0.0   | 0.0   | 0.0   |
| Chm     | 8.5   | 8.9   | 8.8   | 11.9  | 9.2   | 10.7  | 8.8   | 8.7   | 8.8  | 9.4   | 11.4  | 11.0  |
| Chml    | 1.4   | 1.3   | 1.4   | 1.3   | 1.3   | 1.9   | 1.5   | 1.5   | 1.4  | 1.3   | 1.7   | 1.8   |
| Chmp1a  | 40.9  | 41.5  | 34.2  | 42.6  | 40.3  | 44.4  | 40.8  | 37.2  | 41.7 | 44.1  | 38.1  | 38.1  |
| Chmp1b  | 26.1  | 24.7  | 28.0  | 37.5  | 25.0  | 29.2  | 27.3  | 24.8  | 24.3 | 28.6  | 32.9  | 34.4  |
| Chmp2a  | 88.0  | 85.9  | 97.4  | 90.9  | 75.3  | 84.5  | 96.8  | 100.9 | 85.0 | 86.1  | 98.3  | 105.6 |
| Chmp2b  | 26.6  | 25.3  | 27.1  | 27.0  | 23.6  | 30.2  | 24.9  | 25.7  | 23.1 | 25.9  | 29.8  | 31.1  |
| Chmp3   | 93.5  | 69.4  | 60.3  | 102.6 | 66.0  | 92.1  | 73.6  | 55.3  | 55.8 | 68.2  | 81.2  | 79.2  |
| Chmp4b  | 92.0  | 83.8  | 90.2  | 107.8 | 82.2  | 94.3  | 92.9  | 91.3  | 78.2 | 89.0  | 100.8 | 106.4 |
| Chmp4c  | 0.8   | 0.2   | 0.4   | 0.4   | 0.2   | 0.2   | 0.2   | 0.1   | 0.1  | 1.0   | 0.4   | 0.4   |
| Chmp5   | 132.1 | 119.6 | 110.7 | 147.4 | 102.4 | 144.2 | 104.0 | 91.2  | 95.1 | 115.8 | 123.9 | 122.8 |
| Chmp6   | 15.0  | 13.3  | 14.7  | 14.5  | 15.6  | 13.0  | 15.2  | 16.8  | 16.9 | 14.0  | 14.5  | 13.7  |
| Chmp7   | 27.5  | 25.0  | 20.3  | 27.9  | 23.8  | 28.6  | 21.1  | 17.9  | 20.8 | 22.6  | 20.9  | 20.5  |
| Chn1    | 6.8   | 5.7   | 4.1   | 9.0   | 5.0   | 7.3   | 4.6   | 3.0   | 3.4  | 2.9   | 3.3   | 3.4   |
| Chn2    | 1.6   | 1.3   | 0.8   | 1.3   | 1.2   | 1.2   | 1.1   | 1.3   | 0.9  | 3.2   | 2.3   | 1.1   |
| Chodl   | 0.0   | 0.0   | 0.0   | 0.0   | 0.0   | 0.0   | 0.0   | 0.0   | 0.0  | 0.0   | 0.0   | 0.0   |
| Chordc1 | 30.7  | 34.4  | 34.7  | 36.7  | 31.1  | 34.1  | 32.1  | 26.7  | 28.1 | 37.3  | 42.2  | 39.0  |
| Chp1    | 60.7  | 54.7  | 49.4  | 56.0  | 51.7  | 55.4  | 51.5  | 50.2  | 51.3 | 61.1  | 57.7  | 56.1  |
| Chpf    | 28.4  | 17.9  | 14.3  | 27.1  | 26.9  | 34.6  | 32.0  | 23.4  | 26.6 | 28.3  | 23.9  | 23.8  |
| Chpf2   | 36.2  | 31.2  | 24.8  | 37.7  | 36.8  | 35.9  | 35.0  | 29.2  | 35.0 | 29.9  | 27.1  | 27.0  |
| Chpt1   | 22.0  | 20.6  | 21.6  | 22.7  | 17.3  | 29.6  | 19.8  | 16.0  | 18.6 | 20.7  | 22.2  | 22.4  |
| Chrac1  | 18.5  | 17.7  | 18.8  | 19.2  | 19.0  | 18.5  | 20.7  | 19.1  | 20.8 | 19.3  | 19.8  | 18.9  |
| Chrd    | 1.0   | 0.7   | 0.3   | 0.5   | 0.4   | 1.0   | 1.0   | 1.0   | 1.1  | 1.1   | 1.5   | 1.1   |
| Chrdl1  | 0.3   | 0.0   | 0.3   | 0.0   | 0.0   | 0.0   | 0.0   | 0.1   | 0.0  | 0.0   | 0.0   | 0.1   |
| Chrm1   | 0.0   | 0.0   | 0.0   | 0.0   | 0.0   | 0.0   | 0.0   | 0.0   | 0.0  | 0.0   | 0.0   | 0.0   |
| Chrm3   | 0.2   | 0.1   | 0.1   | 0.1   | 0.2   | 0.1   | 0.1   | 0.0   | 0.0  | 0.0   | 0.0   | 0.1   |
| Chrm4   | 0.1   | 0.0   | 0.1   | 0.1   | 0.0   | 0.1   | 0.1   | 0.1   | 0.0  | 0.0   | 0.0   | 0.0   |
| Chrna1  | 0.0   | 0.0   | 0.0   | 0.0   | 0.0   | 0.0   | 0.1   | 0.1   | 0.0  | 0.0   | 0.0   | 0.0   |
| Chrna10 | 0.0   | 0.0   | 0.0   | 0.0   | 0.0   | 0.0   | 0.0   | 0.0   | 0.0  | 0.0   | 0.0   | 0.0   |
| Chrna2  | 0.1   | 0.2   | 0.2   | 0.2   | 0.2   | 0.1   | 0.2   | 0.1   | 0.1  | 0.2   | 0.2   | 0.2   |
| Chrna4  | 0.0   | 0.0   | 0.0   | 0.0   | 0.0   | 0.0   | 0.0   | 0.0   | 0.0  | 0.0   | 0.0   | 0.1   |
| Chrna7  | 0.3   | 0.1   | 0.1   | 0.3   | 0.1   | 0.6   | 0.1   | 0.1   | 0.1  | 0.0   | 0.0   | 0.0   |
| Chrna9  | 0.0   | 0.0   | 0.0   | 0.0   | 0.0   | 0.0   | 0.0   | 0.0   | 0.0  | 0.0   | 0.0   | 0.0   |
| Chrb1   | 2.6   | 2.2   | 2.2   | 3.9   | 2.7   | 2.6   | 3.1   | 3.3   | 3.2  | 2.6   | 2.6   | 2.2   |
| Chrb2   | 0.2   | 0.2   | 0.0   | 0.1   | 0.1   | 0.2   | 0.1   | 0.1   | 0.0  | 0.1   | 0.0   | 0.0   |
| Chst1   | 0.2   | 0.3   | 0.4   | 0.3   | 0.2   | 0.5   | 0.5   | 0.6   | 0.4  | 0.3   | 0.2   | 0.2   |
| Chst10  | 1.9   | 1.5   | 1.4   | 2.3   | 1.3   | 2.6   | 1.7   | 1.3   | 1.1  | 1.0   | 1.2   | 1.1   |
| Chst11  | 3.6   | 3.3   | 3.6   | 3.3   | 4.3   | 2.9   | 3.9   | 3.9   | 4.9  | 5.5   | 3.5   | 7.0   |
| Chst12  | 15.2  | 14.3  | 14.6  | 22.0  | 19.0  | 18.9  | 21.8  | 16.6  | 16.2 | 17.7  | 22.9  | 15.2  |
| Chst13  | 0.0   | 0.1   | 0.1   | 0.0   | 0.1   | 0.1   | 0.0   | 0.1   | 0.1  | 0.1   | 0.1   | 0.1   |
| Chst14  | 15.0  | 12.3  | 11.6  | 13.1  | 12.3  | 14.2  | 16.2  | 13.1  | 15.0 | 12.1  | 12.1  | 11.4  |
| Chst15  | 0.4   | 0.5   | 0.4   | 0.6   | 0.8   | 0.7   | 0.7   | 0.5   | 0.6  | 1.2   | 1.0   | 0.9   |
| Chst2   | 0.6   | 1.0   | 1.0   | 0.8   | 1.5   | 1.2   | 2.0   | 1.3   | 1.8  | 1.4   | 1.2   | 1.2   |
| Chst3   | 0.0   | 0.0   | 0.0   | 0.0   | 0.2   | 0.0   | 0.0   | 0.1   | 0.0  | 0.0   | 0.0   | 0.0   |
| Chst5   | 0.0   | 0.0   | 0.0   | 0.0   | 0.1   | 0.0   | 0.0   | 0.0   | 0.0  | 0.0   | 0.0   | 0.0   |
| Chst7   | 5.4   | 3.8   | 3.1   | 4.5   | 4.1   | 5.1   | 5.2   | 3.8   | 4.1  | 3.1   | 2.7   | 2.9   |
| Chst8   | 0.1   | 0.0   | 0.0   | 0.0   | 0.0   | 0.0   | 0.0   | 0.0   | 0.0  | 0.0   | 0.0   | 0.0   |
| Chsy1   | 15.1  | 15.1  | 21.9  | 13.1  | 15.8  | 14.0  | 20.7  | 20.8  | 18.8 | 16.4  | 18.6  | 21.8  |
| Chsy3   | 0.5   | 0.8   | 0.9   | 0.5   | 0.9   | 0.3   | 1.0   | 0.9   | 1.2  | 0.8   | 0.7   | 0.9   |
| Chtf18  | 0.8   | 1.5   | 2.0   | 0.6   | 1.7   | 0.7   | 1.9   | 1.1   | 1.5  | 1.0   | 1.6   | 0.8   |
| Chtf8   | 32.4  | 34.2  | 29.5  | 33.7  | 35.5  | 33.6  | 34.5  | 34.3  | 37.4 | 36.0  | 33.4  | 31.2  |
| Chtop   | 15.6  | 13.8  | 16.0  | 14.0  | 14.1  | 15.8  | 14.0  | 17.4  | 16.3 | 16.3  | 15.4  | 16.0  |

Online Table 1

|         |      |      |      |       |       |       |      |      |      |      |      |      |
|---------|------|------|------|-------|-------|-------|------|------|------|------|------|------|
| Chuk    | 17.9 | 19.8 | 16.6 | 16.1  | 17.5  | 17.4  | 16.8 | 14.4 | 18.2 | 17.7 | 18.9 | 17.3 |
| Churc1  | 28.1 | 19.2 | 15.1 | 21.3  | 18.1  | 23.4  | 17.6 | 14.7 | 17.7 | 22.6 | 21.5 | 18.7 |
| Ciao1   | 18.0 | 17.5 | 15.3 | 21.1  | 14.5  | 17.1  | 14.6 | 12.9 | 12.9 | 15.5 | 13.8 | 15.7 |
| Ciapi1  | 2.3  | 2.1  | 1.7  | 2.3   | 2.4   | 1.6   | 2.4  | 2.2  | 2.5  | 2.0  | 2.1  | 1.9  |
| Cib1    | 26.2 | 25.2 | 20.8 | 26.0  | 31.2  | 24.3  | 27.7 | 27.0 | 27.8 | 27.4 | 25.3 | 26.8 |
| Cib2    | 7.5  | 6.5  | 4.9  | 5.7   | 4.0   | 7.0   | 3.9  | 3.6  | 3.8  | 5.6  | 5.0  | 5.0  |
| Cib3    | 0.1  | 0.2  | 0.1  | 0.0   | 0.2   | 0.0   | 0.1  | 0.0  | 0.0  | 0.1  | 0.0  | 0.1  |
| Cic     | 2.8  | 3.4  | 3.6  | 3.3   | 3.9   | 3.2   | 4.0  | 3.5  | 3.5  | 3.0  | 2.5  | 2.3  |
| Cideb   | 0.3  | 0.4  | 0.3  | 0.5   | 0.3   | 0.1   | 0.7  | 0.6  | 0.4  | 0.2  | 0.4  | 0.7  |
| Ciita   | 0.0  | 0.1  | 0.0  | 0.0   | 0.0   | 0.1   | 0.0  | 0.0  | 0.0  | 0.1  | 0.0  | 0.0  |
| Cilp    | 0.1  | 0.4  | 2.4  | 0.0   | 0.2   | 0.1   | 0.3  | 2.3  | 0.7  | 0.5  | 1.0  | 0.5  |
| Cilp2   | 0.1  | 0.0  | 0.0  | 0.1   | 0.0   | 0.0   | 0.0  | 0.0  | 0.0  | 0.2  | 0.0  | 0.1  |
| Cinp    | 8.7  | 9.6  | 9.4  | 9.6   | 8.8   | 9.0   | 9.7  | 9.6  | 8.9  | 9.2  | 9.7  | 9.2  |
| Cir1    | 12.9 | 13.0 | 15.2 | 18.7  | 11.1  | 15.4  | 11.1 | 13.0 | 9.8  | 14.2 | 14.7 | 18.2 |
| Cirbp   | 4.7  | 3.3  | 5.0  | 3.2   | 3.5   | 4.4   | 4.3  | 6.4  | 5.3  | 5.0  | 3.8  | 5.8  |
| Cirh1a  | 15.3 | 15.9 | 12.7 | 16.3  | 14.6  | 15.4  | 12.9 | 14.1 | 11.1 | 14.8 | 14.7 | 13.5 |
| Cisd1   | 35.8 | 29.5 | 23.4 | 29.3  | 28.8  | 31.1  | 26.6 | 22.0 | 25.8 | 30.1 | 26.1 | 26.5 |
| Cisd2   | 8.7  | 8.0  | 10.0 | 10.0  | 9.0   | 8.9   | 9.0  | 9.9  | 9.5  | 8.7  | 10.7 | 9.7  |
| Cisd3   | 15.0 | 13.7 | 14.0 | 15.0  | 13.3  | 13.8  | 11.7 | 13.6 | 12.7 | 11.6 | 13.5 | 11.6 |
| Cish    | 0.5  | 0.3  | 0.3  | 0.1   | 0.7   | 0.5   | 0.5  | 0.3  | 0.4  | 0.5  | 0.3  | 0.3  |
| Cit     | 0.2  | 0.3  | 0.7  | 0.1   | 0.6   | 0.1   | 0.9  | 0.3  | 0.6  | 0.3  | 0.4  | 0.3  |
| Cited2  | 23.1 | 24.6 | 19.5 | 34.5  | 20.7  | 32.2  | 20.2 | 12.5 | 14.8 | 17.5 | 18.4 | 13.2 |
| Cited4  | 0.2  | 0.2  | 0.1  | 0.0   | 0.1   | 0.1   | 0.2  | 0.2  | 0.1  | 0.1  | 0.1  | 0.0  |
| Ciz1    | 9.2  | 9.9  | 12.2 | 14.0  | 9.3   | 11.2  | 11.8 | 11.7 | 9.5  | 7.8  | 10.6 | 10.5 |
| Ckap2   | 10.0 | 17.5 | 29.0 | 4.0   | 21.5  | 5.6   | 25.8 | 9.3  | 20.3 | 13.9 | 21.0 | 15.2 |
| Ckap2l  | 2.1  | 4.4  | 7.6  | 1.0   | 5.7   | 0.6   | 9.8  | 3.1  | 6.7  | 2.7  | 6.1  | 4.4  |
| Ckap4   | 43.3 | 40.4 | 48.2 | 42.8  | 44.0  | 37.8  | 60.8 | 53.1 | 50.3 | 51.8 | 51.3 | 49.2 |
| Ckap5   | 21.6 | 22.9 | 23.3 | 19.4  | 21.9  | 22.3  | 22.1 | 21.5 | 23.2 | 19.8 | 24.0 | 22.8 |
| Ckb     | 91.1 | 67.1 | 26.9 | 160.9 | 166.2 | 121.3 | 56.2 | 32.3 | 30.4 | 60.4 | 43.2 | 39.1 |
| Cklf    | 9.1  | 10.3 | 6.2  | 10.7  | 14.6  | 6.8   | 8.8  | 5.4  | 10.7 | 8.7  | 8.9  | 7.6  |
| Ckmt1   | 0.7  | 0.3  | 0.2  | 0.1   | 0.0   | 0.1   | 0.0  | 0.0  | 0.1  | 2.7  | 0.9  | 0.7  |
| Cks1b   | 28.3 | 25.2 | 31.0 | 21.2  | 29.0  | 20.9  | 38.9 | 30.4 | 32.8 | 26.7 | 36.6 | 23.9 |
| Cks2    | 16.3 | 24.2 | 32.8 | 18.5  | 33.7  | 16.6  | 34.4 | 20.9 | 32.5 | 24.0 | 29.7 | 24.9 |
| Clasp1  | 11.7 | 12.2 | 12.4 | 12.1  | 12.4  | 12.8  | 13.2 | 11.0 | 11.5 | 12.3 | 12.8 | 12.4 |
| Clasp2  | 11.3 | 16.6 | 16.5 | 10.8  | 14.8  | 13.8  | 17.1 | 15.2 | 20.5 | 13.2 | 15.0 | 17.3 |
| Clasrp  | 5.5  | 6.1  | 7.7  | 5.9   | 5.1   | 5.6   | 7.9  | 5.7  | 7.0  | 6.8  | 6.5  | 6.4  |
| Clca1   | 26.4 | 31.3 | 44.0 | 18.5  | 53.4  | 14.1  | 54.1 | 59.2 | 65.1 | 45.4 | 36.4 | 49.4 |
| Clca2   | 3.3  | 3.6  | 4.9  | 2.0   | 5.8   | 1.4   | 5.5  | 6.9  | 8.1  | 5.9  | 4.0  | 6.3  |
| Clca4   | 0.1  | 0.1  | 0.1  | 0.0   | 0.2   | 0.0   | 0.1  | 0.1  | 0.2  | 0.1  | 0.1  | 0.2  |
| Clca5   | 0.1  | 0.0  | 0.1  | 0.1   | 0.1   | 0.1   | 0.1  | 0.1  | 0.1  | 0.0  | 0.0  | 0.0  |
| Clca6   | 0.1  | 0.0  | 0.1  | 0.2   | 0.0   | 0.1   | 0.0  | 0.0  | 0.0  | 0.0  | 0.0  | 0.0  |
| Clcc1   | 13.5 | 13.4 | 16.3 | 13.1  | 14.2  | 14.8  | 12.2 | 11.6 | 13.4 | 12.7 | 12.6 | 13.6 |
| Clcf1   | 5.5  | 6.4  | 5.9  | 3.7   | 4.0   | 4.7   | 6.0  | 7.6  | 5.7  | 7.2  | 8.1  | 5.5  |
| Clcn1   | 0.0  | 0.0  | 0.0  | 0.0   | 0.0   | 0.0   | 0.0  | 0.0  | 0.0  | 0.1  | 0.0  | 0.0  |
| Clcn2   | 0.8  | 1.1  | 0.9  | 0.8   | 0.8   | 1.1   | 1.0  | 0.8  | 1.2  | 1.4  | 0.9  | 0.9  |
| Clcn3   | 4.9  | 3.8  | 3.3  | 3.6   | 4.0   | 3.9   | 3.3  | 3.0  | 3.2  | 4.4  | 4.1  | 3.8  |
| Clcn4-2 | 14.7 | 13.0 | 12.5 | 16.8  | 15.8  | 15.5  | 16.7 | 14.4 | 15.4 | 16.1 | 15.3 | 16.5 |
| Clcn5   | 3.4  | 2.6  | 2.6  | 2.5   | 3.0   | 3.2   | 1.8  | 3.2  | 2.3  | 2.8  | 2.1  | 2.4  |
| Clcn6   | 1.5  | 1.8  | 1.8  | 1.6   | 1.2   | 1.2   | 2.0  | 1.7  | 1.9  | 1.0  | 1.3  | 1.1  |
| Clcn7   | 21.4 | 18.0 | 16.4 | 25.1  | 21.9  | 23.6  | 17.4 | 16.4 | 15.7 | 16.3 | 13.5 | 14.9 |
| Clcnkb  | 0.0  | 0.0  | 0.0  | 0.0   | 0.0   | 0.0   | 0.0  | 0.0  | 0.0  | 0.0  | 0.0  | 0.0  |
| Cldn1   | 0.1  | 0.2  | 0.1  | 0.0   | 0.0   | 0.1   | 0.0  | 0.1  | 0.1  | 0.0  | 0.1  | 0.1  |
| Cldn10  | 0.1  | 0.1  | 0.0  | 0.0   | 0.0   | 0.0   | 0.0  | 0.0  | 0.0  | 0.1  | 0.1  | 0.1  |
| Cldn11  | 0.0  | 0.0  | 0.0  | 0.1   | 0.0   | 0.0   | 0.0  | 0.0  | 0.0  | 0.0  | 0.1  | 0.0  |
| Cldn12  | 8.5  | 10.4 | 9.8  | 9.4   | 9.4   | 9.4   | 11.4 | 11.2 | 11.4 | 12.3 | 12.3 | 10.8 |
| Cldn15  | 8.3  | 15.8 | 10.9 | 7.9   | 10.4  | 8.6   | 13.3 | 16.3 | 13.1 | 18.8 | 14.0 | 7.4  |
| Cldn19  | 0.0  | 0.0  | 0.0  | 0.0   | 0.0   | 0.0   | 0.0  | 0.0  | 0.0  | 0.0  | 0.0  | 0.0  |

Online Table 1

|         |       |       |       |       |       |       |       |       |       |       |       |       |
|---------|-------|-------|-------|-------|-------|-------|-------|-------|-------|-------|-------|-------|
| Cldn20  | 0.1   | 0.1   | 0.2   | 0.2   | 0.3   | 0.0   | 0.0   | 0.1   | 0.0   | 0.0   | 0.0   | 0.0   |
| Cldn22  | 0.8   | 0.4   | 0.4   | 0.3   | 0.2   | 0.5   | 0.7   | 0.3   | 0.2   | 0.3   | 0.3   | 0.5   |
| Cldn23  | 0.0   | 0.0   | 0.0   | 0.0   | 0.0   | 0.0   | 0.0   | 0.0   | 0.0   | 0.0   | 0.0   | 0.0   |
| Cldn24  | 0.1   | 0.0   | 0.3   | 0.0   | 0.2   | 0.0   | 0.0   | 0.1   | 0.1   | 0.2   | 0.1   | 0.1   |
| Cldn25  | 12.9  | 13.8  | 13.5  | 12.9  | 12.3  | 15.0  | 13.5  | 13.3  | 15.4  | 15.0  | 14.8  | 14.9  |
| Cldn3   | 0.2   | 0.1   | 0.0   | 0.1   | 0.0   | 0.0   | 0.1   | 0.0   | 0.0   | 0.0   | 0.1   | 0.0   |
| Cldn5   | 0.1   | 0.1   | 0.4   | 0.0   | 0.1   | 0.0   | 0.3   | 0.7   | 0.3   | 0.1   | 0.0   | 0.0   |
| Cldn7   | 0.0   | 0.2   | 0.0   | 0.0   | 0.0   | 0.1   | 0.0   | 0.1   | 0.1   | 0.1   | 0.0   | 0.0   |
| Cldnd2  | 0.0   | 0.2   | 0.2   | 0.0   | 0.0   | 0.0   | 0.1   | 0.0   | 0.0   | 0.0   | 0.0   | 0.0   |
| Clec10a | 0.0   | 0.0   | 0.0   | 0.1   | 0.1   | 0.0   | 0.0   | 0.0   | 0.0   | 0.1   | 0.0   | 0.0   |
| Clec11a | 5.9   | 5.7   | 7.2   | 3.8   | 5.5   | 5.2   | 6.6   | 4.8   | 5.7   | 6.2   | 6.5   | 7.8   |
| Clec12a | 1.1   | 0.0   | 0.0   | 8.7   | 12.6  | 0.0   | 0.8   | 0.2   | 0.3   | 1.0   | 0.2   | 0.7   |
| Clec14a | 0.1   | 0.0   | 0.1   | 0.1   | 0.0   | 0.0   | 0.0   | 0.1   | 0.0   | 0.1   | 0.2   | 0.0   |
| Clec16a | 3.6   | 4.1   | 4.3   | 4.5   | 3.6   | 4.1   | 3.4   | 3.3   | 3.1   | 3.3   | 3.3   | 3.4   |
| Clec18a | 0.0   | 0.0   | 0.0   | 0.1   | 0.0   | 0.0   | 0.0   | 0.0   | 0.0   | 0.0   | 0.0   | 0.0   |
| Clec1a  | 0.1   | 0.0   | 0.1   | 0.0   | 0.0   | 0.0   | 0.1   | 0.3   | 0.2   | 0.0   | 0.1   | 0.0   |
| Clec2d  | 48.4  | 69.6  | 113.1 | 40.3  | 65.0  | 40.6  | 76.2  | 113.4 | 83.5  | 63.4  | 72.5  | 105.0 |
| Clec2e  | 0.0   | 0.0   | 0.1   | 0.0   | 0.0   | 0.0   | 0.0   | 0.0   | 0.1   | 0.2   | 0.1   | 0.1   |
| Clec2g  | 0.1   | 0.2   | 0.1   | 0.0   | 0.1   | 0.1   | 0.1   | 0.1   | 0.1   | 0.2   | 0.4   | 0.1   |
| Clec2h  | 0.0   | 0.0   | 0.0   | 0.0   | 0.0   | 0.0   | 0.0   | 0.0   | 0.0   | 0.0   | 0.0   | 0.0   |
| Clec2i  | 0.0   | 0.2   | 0.0   | 0.1   | 0.0   | 0.0   | 0.0   | 0.0   | 0.1   | 0.0   | 0.0   | 0.1   |
| Clec2l  | 0.0   | 0.1   | 0.1   | 0.0   | 0.1   | 0.2   | 0.2   | 0.2   | 0.3   | 0.1   | 0.0   | 0.0   |
| Clec3b  | 0.1   | 0.3   | 0.8   | 0.0   | 0.0   | 0.0   | 0.3   | 1.0   | 0.4   | 0.1   | 0.2   | 0.2   |
| Clec4a1 | 0.4   | 0.0   | 0.0   | 1.7   | 9.0   | 0.0   | 1.1   | 0.2   | 0.4   | 0.5   | 0.2   | 0.3   |
| Clec4a2 | 0.1   | 0.0   | 0.0   | 0.6   | 2.2   | 0.0   | 0.3   | 0.1   | 0.1   | 0.1   | 0.1   | 0.1   |
| Clec4a3 | 0.1   | 0.0   | 0.0   | 0.4   | 0.5   | 0.0   | 0.3   | 0.0   | 0.1   | 0.1   | 0.1   | 0.1   |
| Clec4a4 | 0.2   | 0.0   | 0.0   | 0.3   | 0.4   | 0.0   | 0.0   | 0.0   | 0.0   | 0.0   | 0.0   | 0.0   |
| Clec4d  | 4.8   | 0.1   | 0.2   | 42.2  | 65.5  | 0.0   | 5.9   | 0.9   | 0.9   | 4.6   | 1.1   | 2.5   |
| Clec4e  | 0.3   | 0.0   | 0.1   | 3.1   | 4.1   | 0.0   | 0.4   | 0.0   | 0.1   | 0.4   | 0.1   | 0.3   |
| Clec4f  | 0.0   | 0.0   | 0.0   | 0.0   | 0.0   | 0.0   | 0.0   | 0.0   | 0.0   | 0.0   | 0.0   | 0.0   |
| Clec4n  | 7.7   | 0.1   | 0.7   | 26.1  | 51.3  | 0.0   | 2.1   | 0.7   | 0.3   | 1.8   | 0.7   | 0.5   |
| Clec5a  | 0.4   | 0.0   | 0.0   | 3.3   | 6.2   | 0.0   | 0.7   | 0.1   | 0.1   | 0.4   | 0.2   | 0.4   |
| Clec7a  | 0.4   | 0.0   | 0.0   | 2.0   | 1.5   | 0.0   | 0.3   | 0.1   | 0.0   | 0.2   | 0.3   | 0.1   |
| Clec9a  | 0.0   | 0.0   | 0.0   | 0.0   | 0.0   | 0.0   | 0.0   | 0.1   | 0.0   | 0.0   | 0.0   | 0.0   |
| Clgn    | 0.0   | 0.0   | 0.0   | 0.0   | 0.1   | 0.0   | 0.0   | 0.0   | 0.0   | 0.0   | 0.0   | 0.0   |
| Clhc1   | 0.4   | 0.7   | 1.0   | 0.4   | 1.2   | 0.3   | 1.7   | 0.9   | 1.0   | 0.7   | 0.8   | 0.7   |
| Clc1    | 129.3 | 107.9 | 109.2 | 147.3 | 151.2 | 121.7 | 128.4 | 117.7 | 117.1 | 130.8 | 132.7 | 132.7 |
| Clc3    | 0.4   | 0.3   | 0.0   | 0.0   | 0.2   | 0.4   | 0.2   | 0.5   | 0.2   | 0.1   | 0.2   | 0.2   |
| Clc4    | 162.7 | 153.7 | 140.7 | 172.8 | 153.6 | 138.6 | 145.7 | 138.0 | 135.6 | 129.6 | 154.2 | 153.4 |
| Clc5    | 0.3   | 0.1   | 0.0   | 0.2   | 0.1   | 0.2   | 0.1   | 0.1   | 0.1   | 0.1   | 0.1   | 0.1   |
| Clc6    | 0.1   | 0.0   | 0.0   | 0.0   | 0.0   | 0.0   | 0.0   | 0.0   | 0.0   | 0.0   | 0.0   | 0.0   |
| Clint1  | 37.5  | 36.5  | 37.5  | 41.1  | 36.5  | 35.6  | 48.2  | 40.8  | 39.2  | 38.4  | 47.1  | 47.3  |
| Clip1   | 63.5  | 59.2  | 56.8  | 64.1  | 51.5  | 50.8  | 54.8  | 49.4  | 40.7  | 45.3  | 54.9  | 58.9  |
| Clip2   | 9.8   | 8.9   | 7.6   | 12.5  | 11.4  | 10.7  | 11.6  | 7.8   | 10.3  | 9.4   | 9.5   | 9.8   |
| Clip3   | 2.5   | 3.0   | 3.4   | 2.6   | 2.6   | 3.7   | 2.7   | 3.3   | 2.8   | 3.1   | 3.7   | 3.3   |
| Clip4   | 0.8   | 0.8   | 1.0   | 1.1   | 0.4   | 1.1   | 0.7   | 0.7   | 0.3   | 0.6   | 0.8   | 0.8   |
| Clk1    | 29.0  | 33.0  | 37.8  | 28.3  | 31.9  | 31.1  | 32.7  | 32.9  | 30.4  | 32.9  | 33.1  | 36.2  |
| Clk2    | 6.5   | 7.0   | 8.5   | 8.2   | 7.3   | 6.8   | 8.2   | 7.8   | 7.5   | 7.1   | 7.7   | 7.7   |
| Clk3    | 14.9  | 16.4  | 17.4  | 16.0  | 15.7  | 15.3  | 18.8  | 16.3  | 16.9  | 15.4  | 16.4  | 16.5  |
| Clk4    | 10.8  | 12.8  | 14.5  | 12.9  | 10.3  | 11.2  | 12.8  | 12.5  | 11.7  | 11.2  | 13.6  | 12.4  |
| Clmn    | 0.1   | 0.2   | 0.2   | 0.1   | 0.0   | 0.1   | 0.0   | 0.1   | 0.0   | 0.2   | 0.2   | 0.1   |
| Clmp    | 14.5  | 26.8  | 52.9  | 15.2  | 30.9  | 13.7  | 32.8  | 52.2  | 28.6  | 19.9  | 24.6  | 28.7  |
| Cln3    | 0.5   | 0.8   | 0.6   | 1.7   | 2.2   | 0.7   | 0.7   | 0.4   | 0.6   | 1.1   | 0.7   | 0.7   |
| Cln5    | 31.5  | 24.3  | 23.5  | 36.6  | 33.4  | 32.1  | 27.1  | 24.9  | 25.9  | 31.2  | 30.7  | 34.3  |
| Cln6    | 2.3   | 3.0   | 3.1   | 2.4   | 3.5   | 2.6   | 2.2   | 3.9   | 3.3   | 2.6   | 3.0   | 1.9   |
| Cln8    | 3.8   | 3.0   | 2.8   | 4.4   | 4.6   | 3.4   | 2.4   | 2.5   | 2.5   | 3.3   | 2.7   | 2.5   |
| Clnk    | 0.0   | 0.0   | 0.0   | 0.1   | 0.1   | 0.0   | 0.0   | 0.1   | 0.0   | 0.0   | 0.1   | 0.0   |

Online Table 1

|         |       |       |       |       |       |       |       |       |       |       |       |       |
|---------|-------|-------|-------|-------|-------|-------|-------|-------|-------|-------|-------|-------|
| Clns1a  | 12.2  | 11.9  | 10.1  | 11.1  | 11.7  | 12.1  | 10.9  | 11.6  | 11.2  | 12.4  | 11.7  | 10.0  |
| Clock   | 11.0  | 12.0  | 12.3  | 12.2  | 10.5  | 11.1  | 10.2  | 11.8  | 10.9  | 10.1  | 13.6  | 12.3  |
| Clp1    | 4.6   | 4.3   | 3.2   | 3.6   | 4.5   | 3.8   | 3.9   | 3.7   | 3.6   | 3.8   | 3.0   | 3.9   |
| Clpb    | 8.0   | 6.9   | 7.3   | 9.0   | 6.1   | 8.2   | 7.2   | 7.4   | 6.0   | 6.1   | 6.8   | 6.4   |
| Clpp    | 19.4  | 17.3  | 14.6  | 25.3  | 15.5  | 21.4  | 17.9  | 18.7  | 13.9  | 20.1  | 21.2  | 16.4  |
| Clptm1  | 24.5  | 24.6  | 23.2  | 28.7  | 27.3  | 25.2  | 28.4  | 27.4  | 26.4  | 26.9  | 24.5  | 24.8  |
| Clptm1l | 70.3  | 63.5  | 55.5  | 81.2  | 67.6  | 75.5  | 63.9  | 56.5  | 60.1  | 63.5  | 65.7  | 61.8  |
| Clpx    | 10.9  | 12.3  | 12.1  | 8.8   | 9.2   | 9.0   | 8.7   | 10.7  | 10.8  | 11.4  | 10.7  | 11.8  |
| Clspn   | 1.2   | 2.2   | 3.8   | 0.5   | 2.9   | 0.5   | 4.2   | 2.1   | 2.3   | 1.4   | 2.2   | 1.8   |
| Clstn1  | 43.6  | 42.2  | 39.3  | 44.3  | 38.8  | 48.2  | 46.2  | 46.8  | 40.0  | 35.3  | 38.6  | 37.2  |
| Clstn2  | 0.1   | 0.0   | 0.1   | 0.2   | 0.0   | 0.0   | 0.1   | 0.1   | 0.0   | 0.1   | 0.0   | 0.1   |
| Clstn3  | 0.0   | 0.0   | 0.0   | 0.0   | 0.0   | 0.0   | 0.0   | 0.0   | 0.0   | 0.0   | 0.0   | 0.0   |
| Clta    | 183.8 | 143.1 | 160.5 | 187.1 | 157.5 | 152.1 | 157.9 | 147.8 | 132.9 | 171.1 | 174.5 | 178.5 |
| Cltb    | 90.5  | 83.5  | 81.7  | 110.7 | 73.7  | 79.3  | 108.8 | 91.7  | 80.9  | 85.2  | 109.2 | 88.8  |
| Cltc    | 89.9  | 85.9  | 74.4  | 86.4  | 93.0  | 86.1  | 78.4  | 91.1  | 83.4  | 88.5  | 89.5  | 82.8  |
| Clu     | 10.2  | 12.7  | 23.8  | 6.0   | 7.8   | 7.7   | 5.5   | 14.7  | 7.2   | 32.2  | 16.6  | 14.0  |
| Cluap1  | 9.8   | 9.9   | 8.5   | 7.7   | 6.4   | 9.8   | 5.6   | 7.9   | 7.1   | 8.3   | 7.7   | 7.8   |
| Cluh    | 7.1   | 5.5   | 5.0   | 6.9   | 7.0   | 6.9   | 7.0   | 6.2   | 5.4   | 5.4   | 5.5   | 4.8   |
| Clvs1   | 0.1   | 0.1   | 0.0   | 0.0   | 0.0   | 0.0   | 0.1   | 0.1   | 0.1   | 0.0   | 0.0   | 0.0   |
| Clybl   | 7.2   | 8.3   | 9.9   | 6.4   | 6.8   | 9.2   | 7.3   | 8.1   | 6.5   | 5.5   | 6.9   | 6.4   |
| Cma1    | 0.0   | 0.0   | 0.0   | 0.1   | 0.0   | 0.0   | 0.1   | 0.0   | 0.0   | 0.0   | 0.0   | 0.0   |
| Cmah    | 0.4   | 0.5   | 0.5   | 0.6   | 0.8   | 0.2   | 1.0   | 0.9   | 0.9   | 0.7   | 1.3   | 1.1   |
| Cmas    | 28.1  | 22.0  | 18.2  | 30.3  | 22.8  | 27.8  | 22.8  | 19.5  | 20.4  | 24.4  | 27.2  | 23.6  |
| Cmbl    | 2.1   | 0.6   | 0.5   | 2.1   | 0.7   | 2.5   | 1.2   | 0.6   | 0.9   | 1.1   | 0.5   | 0.7   |
| Cmc1    | 9.2   | 8.3   | 6.3   | 7.7   | 8.7   | 8.1   | 5.9   | 6.0   | 7.3   | 9.2   | 8.0   | 9.8   |
| Cmc2    | 7.6   | 5.6   | 7.1   | 6.2   | 6.8   | 6.1   | 6.3   | 5.3   | 5.1   | 6.9   | 5.5   | 6.7   |
| Cmip    | 3.0   | 3.9   | 4.4   | 3.4   | 4.9   | 3.4   | 4.2   | 3.1   | 3.1   | 2.8   | 3.2   | 3.1   |
| Cmklr1  | 2.8   | 2.8   | 3.6   | 2.6   | 3.1   | 0.9   | 4.4   | 8.4   | 5.1   | 2.0   | 4.3   | 3.4   |
| Cml1    | 1.3   | 0.8   | 1.3   | 1.3   | 1.1   | 0.9   | 0.5   | 0.6   | 0.6   | 1.5   | 0.7   | 0.6   |
| Cml2    | 0.0   | 0.0   | 0.0   | 0.0   | 0.0   | 0.0   | 0.0   | 0.0   | 0.0   | 0.0   | 0.0   | 0.0   |
| Cml3    | 0.0   | 0.1   | 0.3   | 0.0   | 0.1   | 0.0   | 0.0   | 0.2   | 0.0   | 0.0   | 0.0   | 0.1   |
| Cmpk1   | 35.6  | 34.5  | 35.0  | 43.1  | 36.9  | 31.9  | 29.8  | 28.3  | 30.2  | 36.4  | 37.6  | 38.1  |
| Cmpk2   | 1.8   | 0.4   | 0.4   | 2.8   | 0.5   | 1.0   | 0.3   | 0.4   | 0.3   | 0.2   | 0.5   | 1.0   |
| Cmss1   | 4.1   | 3.5   | 3.1   | 3.2   | 2.5   | 6.0   | 2.3   | 3.9   | 2.6   | 3.0   | 3.7   | 3.1   |
| Cmtm3   | 17.7  | 19.5  | 19.6  | 26.8  | 24.2  | 29.0  | 24.2  | 24.1  | 19.9  | 23.0  | 22.9  | 22.2  |
| Cmtm4   | 15.3  | 14.2  | 11.9  | 16.8  | 14.5  | 20.5  | 14.1  | 9.4   | 13.3  | 13.2  | 13.0  | 13.9  |
| Cmtm5   | 0.1   | 0.4   | 0.1   | 0.2   | 0.1   | 0.1   | 0.0   | 0.1   | 0.1   | 0.3   | 0.4   | 0.2   |
| Cmtm6   | 26.8  | 25.5  | 20.9  | 30.1  | 26.2  | 24.0  | 25.0  | 18.1  | 25.5  | 23.0  | 24.3  | 22.3  |
| Cmtm7   | 30.2  | 25.8  | 20.9  | 33.0  | 31.3  | 27.0  | 26.7  | 24.9  | 25.6  | 30.7  | 28.8  | 24.3  |
| Cmtm8   | 0.2   | 0.0   | 0.2   | 0.4   | 0.2   | 0.0   | 0.2   | 0.2   | 0.2   | 0.1   | 0.1   | 0.1   |
| Cmya5   | 0.0   | 0.0   | 0.1   | 0.0   | 0.1   | 0.1   | 0.0   | 0.1   | 0.1   | 0.1   | 0.0   | 0.1   |
| Cnbd2   | 1.0   | 1.1   | 1.2   | 1.5   | 1.0   | 1.1   | 0.7   | 0.9   | 0.5   | 0.8   | 1.1   | 0.8   |
| Cnbp    | 85.9  | 75.6  | 74.5  | 93.4  | 81.4  | 91.8  | 71.5  | 72.9  | 76.5  | 89.8  | 83.6  | 81.3  |
| Cndp2   | 55.1  | 45.5  | 36.5  | 76.9  | 77.2  | 59.5  | 50.7  | 39.8  | 47.2  | 43.4  | 44.5  | 49.4  |
| Cnep1r1 | 11.3  | 12.0  | 12.0  | 10.4  | 12.1  | 10.7  | 11.3  | 10.5  | 13.2  | 11.8  | 13.6  | 13.4  |
| Cnga2   | 0.0   | 0.0   | 0.0   | 0.0   | 0.0   | 0.0   | 0.0   | 0.0   | 0.0   | 0.0   | 0.0   | 0.0   |
| Cnga3   | 0.1   | 0.0   | 0.0   | 0.0   | 0.1   | 0.0   | 0.0   | 0.0   | 0.0   | 0.0   | 0.0   | 0.0   |
| Cngb1   | 0.1   | 0.1   | 0.2   | 0.2   | 0.1   | 0.3   | 0.1   | 0.2   | 0.1   | 0.2   | 0.3   | 0.1   |
| Cngb3   | 0.0   | 0.0   | 0.0   | 0.1   | 0.1   | 0.1   | 0.0   | 0.0   | 0.0   | 0.0   | 0.0   | 0.0   |
| Cnih    | 64.0  | 60.1  | 58.1  | 72.8  | 61.4  | 73.4  | 72.7  | 62.0  | 70.1  | 71.7  | 82.1  | 72.5  |
| Cnih2   | 0.3   | 0.4   | 0.4   | 0.1   | 0.2   | 0.5   | 0.4   | 0.5   | 0.3   | 0.5   | 0.4   | 0.6   |
| Cnih4   | 10.4  | 9.4   | 8.8   | 11.9  | 9.5   | 10.2  | 10.1  | 8.4   | 9.0   | 12.4  | 10.9  | 11.1  |
| Cnksr1  | 0.4   | 0.2   | 0.4   | 0.2   | 0.3   | 0.2   | 0.0   | 0.1   | 0.1   | 0.1   | 0.2   | 0.1   |
| Cnksr3  | 1.9   | 1.9   | 2.4   | 1.8   | 1.9   | 1.8   | 1.4   | 1.6   | 1.6   | 2.7   | 1.7   | 2.0   |
| Cnn1    | 4.1   | 2.0   | 1.0   | 5.4   | 3.9   | 3.0   | 8.8   | 2.9   | 10.3  | 18.7  | 28.9  | 12.3  |
| Cnn2    | 173.6 | 169.5 | 140.8 | 182.5 | 186.1 | 146.8 | 282.4 | 203.4 | 254.4 | 194.7 | 268.8 | 208.6 |
| Cnn3    | 128.9 | 135.8 | 155.3 | 127.0 | 127.3 | 124.6 | 173.1 | 200.5 | 178.3 | 161.2 | 202.2 | 193.5 |

Online Table 1

|          |      |      |      |      |      |      |      |      |      |      |      |      |
|----------|------|------|------|------|------|------|------|------|------|------|------|------|
| Cnm1     | 0.0  | 0.0  | 0.0  | 0.0  | 0.0  | 0.0  | 0.0  | 0.0  | 0.0  | 0.0  | 0.0  | 0.0  |
| Cnm2     | 3.0  | 2.6  | 2.7  | 3.0  | 2.2  | 2.4  | 2.1  | 2.5  | 2.3  | 2.4  | 2.2  | 2.4  |
| Cnm3     | 1.5  | 1.8  | 1.7  | 1.4  | 1.4  | 1.6  | 1.7  | 1.9  | 1.7  | 1.4  | 1.4  | 1.6  |
| Cnm4     | 1.3  | 1.4  | 1.3  | 1.2  | 1.5  | 1.4  | 1.4  | 1.2  | 1.2  | 1.5  | 1.3  | 1.0  |
| Cnot1    | 13.8 | 15.3 | 17.0 | 13.5 | 16.2 | 13.4 | 14.8 | 18.0 | 14.4 | 14.0 | 15.2 | 14.3 |
| Cnot10   | 7.6  | 8.5  | 8.0  | 7.1  | 7.0  | 8.0  | 7.6  | 7.7  | 7.8  | 8.4  | 7.9  | 7.7  |
| Cnot11   | 5.2  | 5.3  | 6.4  | 5.7  | 5.8  | 5.2  | 5.7  | 6.3  | 6.6  | 6.8  | 5.9  | 6.5  |
| Cnot2    | 17.9 | 18.3 | 21.4 | 18.1 | 15.9 | 17.6 | 18.2 | 18.8 | 17.5 | 18.2 | 20.3 | 20.5 |
| Cnot3    | 2.1  | 2.8  | 3.4  | 2.0  | 2.9  | 2.0  | 3.2  | 3.8  | 3.2  | 2.9  | 3.5  | 3.0  |
| Cnot4    | 5.4  | 5.7  | 6.0  | 7.6  | 5.8  | 6.6  | 5.8  | 5.6  | 4.6  | 4.7  | 6.1  | 5.9  |
| Cnot6    | 5.6  | 7.1  | 8.6  | 3.6  | 7.9  | 4.6  | 6.6  | 8.0  | 8.6  | 8.3  | 7.2  | 8.0  |
| Cnot6l   | 2.6  | 3.7  | 4.6  | 3.8  | 3.9  | 2.7  | 3.4  | 3.2  | 3.5  | 4.0  | 3.6  | 3.6  |
| Cnot7    | 11.9 | 14.3 | 14.7 | 11.7 | 13.5 | 12.0 | 12.2 | 12.7 | 13.2 | 14.4 | 16.5 | 15.0 |
| Cnot8    | 25.6 | 25.4 | 24.4 | 27.1 | 23.7 | 26.1 | 26.3 | 25.1 | 23.9 | 26.5 | 25.8 | 25.5 |
| Cnp      | 6.3  | 7.0  | 7.0  | 6.8  | 8.1  | 7.3  | 5.6  | 4.4  | 6.0  | 5.1  | 4.8  | 4.9  |
| Cnppd1   | 12.9 | 11.5 | 11.5 | 13.3 | 11.3 | 12.7 | 12.9 | 12.1 | 14.4 | 13.6 | 11.3 | 13.2 |
| Cnpy2    | 61.2 | 52.5 | 64.5 | 57.6 | 50.9 | 56.4 | 59.7 | 64.8 | 61.0 | 70.6 | 59.9 | 74.0 |
| Cnpy3    | 27.1 | 23.6 | 24.3 | 31.2 | 27.2 | 34.2 | 25.7 | 27.4 | 24.7 | 24.0 | 22.8 | 25.4 |
| Cnpy4    | 23.2 | 22.1 | 22.5 | 28.9 | 20.9 | 26.0 | 24.3 | 22.3 | 20.5 | 17.9 | 23.6 | 22.7 |
| Cnr1     | 0.1  | 0.0  | 0.0  | 0.1  | 0.0  | 0.1  | 0.1  | 0.0  | 0.1  | 0.0  | 0.0  | 0.0  |
| Cnr2     | 0.1  | 0.0  | 0.0  | 0.8  | 1.3  | 0.0  | 0.1  | 0.0  | 0.0  | 0.1  | 0.0  | 0.0  |
| Cnrip1   | 16.2 | 15.3 | 16.4 | 19.0 | 13.3 | 16.2 | 15.7 | 13.4 | 14.3 | 12.3 | 14.8 | 15.3 |
| Cnst     | 3.6  | 4.0  | 3.8  | 3.9  | 3.9  | 3.4  | 4.4  | 4.1  | 4.8  | 3.9  | 4.5  | 4.3  |
| Cntd1    | 0.1  | 0.1  | 0.6  | 0.1  | 0.3  | 0.2  | 0.2  | 0.1  | 0.2  | 0.2  | 0.1  | 0.1  |
| Cntf     | 0.1  | 0.0  | 0.3  | 0.1  | 0.3  | 0.5  | 0.3  | 0.4  | 0.6  | 0.0  | 0.0  | 0.5  |
| Cntfr    | 0.2  | 0.2  | 0.5  | 0.2  | 0.3  | 0.3  | 0.1  | 0.1  | 0.2  | 0.2  | 0.2  | 0.3  |
| Cntln    | 4.6  | 5.5  | 6.3  | 4.4  | 3.8  | 5.1  | 4.5  | 5.5  | 3.9  | 3.8  | 5.4  | 5.3  |
| Cntn1    | 0.0  | 0.0  | 0.0  | 0.0  | 0.0  | 0.0  | 0.0  | 0.0  | 0.0  | 0.0  | 0.0  | 0.0  |
| Cntn2    | 4.9  | 8.5  | 8.4  | 5.2  | 4.2  | 5.1  | 4.3  | 4.2  | 4.5  | 2.0  | 2.4  | 1.4  |
| Cntn4    | 0.2  | 0.1  | 0.0  | 0.3  | 0.0  | 0.1  | 0.1  | 0.0  | 0.1  | 0.0  | 0.1  | 0.1  |
| Cntn5    | 0.0  | 0.1  | 0.0  | 0.0  | 0.0  | 0.0  | 0.0  | 0.0  | 0.0  | 0.0  | 0.1  | 0.0  |
| Cntnap1  | 0.3  | 0.3  | 0.4  | 0.3  | 0.3  | 0.3  | 0.3  | 0.4  | 0.3  | 0.4  | 0.2  | 0.2  |
| Cntnap2  | 0.0  | 0.0  | 0.0  | 0.0  | 0.0  | 0.0  | 0.0  | 0.0  | 0.0  | 0.0  | 0.0  | 0.0  |
| Cntnap3  | 0.0  | 0.0  | 0.0  | 0.0  | 0.0  | 0.0  | 0.0  | 0.0  | 0.0  | 0.0  | 0.0  | 0.0  |
| Cntnap5a | 0.0  | 0.0  | 0.0  | 0.0  | 0.0  | 0.0  | 0.0  | 0.0  | 0.0  | 0.0  | 0.0  | 0.0  |
| Cntnap5b | 0.0  | 0.0  | 0.0  | 0.0  | 0.0  | 0.0  | 0.0  | 0.0  | 0.0  | 0.0  | 0.0  | 0.0  |
| Cntrob   | 1.9  | 1.9  | 2.4  | 1.5  | 1.8  | 2.0  | 2.4  | 2.3  | 2.5  | 2.1  | 1.8  | 1.9  |
| Coa3     | 46.1 | 46.0 | 39.9 | 54.5 | 42.4 | 57.1 | 43.4 | 45.6 | 44.8 | 42.3 | 37.6 | 43.9 |
| Coa4     | 6.1  | 5.2  | 4.9  | 5.8  | 6.4  | 7.9  | 4.3  | 5.5  | 3.7  | 5.9  | 5.3  | 5.8  |
| Coa5     | 27.4 | 24.0 | 20.2 | 28.9 | 24.4 | 27.1 | 21.8 | 20.8 | 20.4 | 23.6 | 24.9 | 22.2 |
| Coa6     | 11.3 | 10.7 | 6.4  | 11.0 | 10.3 | 13.9 | 9.4  | 8.2  | 8.8  | 11.6 | 9.0  | 7.2  |
| Coasy    | 8.6  | 6.1  | 5.1  | 8.7  | 6.5  | 8.7  | 7.1  | 5.9  | 6.8  | 8.7  | 5.7  | 7.3  |
| Cobl     | 5.1  | 2.1  | 0.9  | 4.8  | 1.4  | 3.1  | 1.5  | 0.3  | 0.5  | 1.9  | 2.4  | 1.0  |
| Cobl1    | 5.9  | 4.8  | 5.3  | 3.0  | 2.6  | 3.0  | 3.1  | 3.7  | 2.6  | 8.1  | 6.3  | 5.7  |
| Coch     | 0.3  | 0.4  | 0.3  | 0.0  | 0.3  | 0.3  | 0.3  | 0.1  | 0.2  | 0.2  | 0.3  | 0.1  |
| Cog1     | 11.1 | 10.7 | 10.2 | 10.8 | 11.1 | 10.8 | 11.5 | 11.3 | 11.1 | 9.4  | 10.4 | 10.1 |
| Cog2     | 10.1 | 11.1 | 10.3 | 10.7 | 10.5 | 11.9 | 10.7 | 12.4 | 11.6 | 11.9 | 10.9 | 10.5 |
| Cog3     | 11.8 | 11.6 | 10.7 | 11.6 | 10.3 | 11.6 | 10.8 | 11.0 | 12.2 | 10.9 | 12.8 | 12.7 |
| Cog4     | 37.4 | 38.4 | 37.0 | 37.4 | 39.4 | 45.6 | 37.5 | 38.7 | 34.3 | 39.3 | 38.1 | 35.5 |
| Cog5     | 11.1 | 11.1 | 8.4  | 9.7  | 9.9  | 10.5 | 7.2  | 9.6  | 8.6  | 8.7  | 8.2  | 8.7  |
| Cog6     | 15.9 | 15.1 | 13.0 | 13.7 | 13.9 | 15.4 | 12.8 | 12.6 | 14.7 | 15.5 | 17.7 | 16.2 |
| Cog7     | 12.6 | 12.1 | 11.3 | 13.4 | 10.4 | 13.1 | 9.1  | 8.7  | 9.6  | 8.2  | 9.0  | 10.0 |
| Cog8     | 13.8 | 13.5 | 12.9 | 12.3 | 12.0 | 12.2 | 11.3 | 14.2 | 12.8 | 14.0 | 13.4 | 12.1 |
| Coil     | 2.4  | 2.3  | 2.4  | 2.6  | 2.0  | 2.4  | 2.2  | 2.6  | 2.3  | 2.6  | 2.5  | 2.4  |
| Col10a1  | 0.1  | 0.1  | 0.1  | 0.1  | 0.2  | 0.1  | 0.2  | 0.1  | 0.1  | 0.2  | 0.2  | 0.1  |
| Col11a1  | 7.7  | 12.4 | 16.8 | 3.6  | 17.4 | 5.3  | 20.2 | 24.7 | 34.4 | 8.0  | 11.6 | 11.9 |
| Col11a2  | 0.3  | 0.3  | 0.2  | 0.4  | 0.3  | 0.5  | 0.4  | 0.1  | 0.4  | 0.4  | 0.2  | 0.2  |

Online Table 1

|          |        |        |        |       |        |       |        |        |        |        |        |        |
|----------|--------|--------|--------|-------|--------|-------|--------|--------|--------|--------|--------|--------|
| Col12a1  | 89.9   | 94.3   | 86.6   | 66.7  | 83.6   | 58.7  | 72.8   | 89.7   | 87.7   | 75.5   | 87.0   | 72.2   |
| Col13a1  | 0.1    | 0.1    | 0.1    | 0.0   | 0.0    | 0.1   | 0.0    | 0.0    | 0.0    | 0.0    | 0.0    | 0.0    |
| Col14a1  | 16.8   | 53.6   | 103.2  | 12.3  | 54.1   | 12.7  | 35.1   | 79.4   | 79.8   | 27.5   | 22.6   | 63.2   |
| Col15a1  | 0.6    | 0.5    | 1.3    | 0.2   | 0.8    | 0.2   | 1.5    | 1.3    | 2.0    | 2.0    | 0.7    | 2.0    |
| Col16a1  | 32.5   | 33.2   | 36.1   | 27.3  | 30.6   | 36.6  | 41.2   | 40.0   | 42.2   | 40.2   | 34.4   | 37.3   |
| Col17a1  | 0.1    | 0.1    | 0.1    | 0.1   | 0.1    | 0.1   | 0.1    | 0.1    | 0.1    | 0.1    | 0.1    | 0.0    |
| Col18a1  | 7.8    | 8.5    | 10.9   | 4.8   | 7.1    | 5.8   | 6.6    | 8.3    | 6.4    | 4.4    | 4.0    | 4.5    |
| Col19a1  | 0.0    | 0.0    | 0.0    | 0.0   | 0.0    | 0.0   | 0.0    | 0.0    | 0.0    | 0.0    | 0.0    | 0.0    |
| Col1a1   | 120.6  | 200.1  | 239.2  | 78.3  | 159.3  | 95.1  | 169.7  | 353.2  | 281.8  | 216.3  | 173.5  | 134.1  |
| Col1a2   | 309.7  | 440.3  | 716.6  | 131.1 | 378.0  | 256.5 | 531.0  | 1042.3 | 978.3  | 662.3  | 522.0  | 545.8  |
| Col20a1  | 0.4    | 0.4    | 0.3    | 0.5   | 0.3    | 0.9   | 0.2    | 0.2    | 0.3    | 0.3    | 0.4    | 0.3    |
| Col22a1  | 0.5    | 0.2    | 0.2    | 0.2   | 0.5    | 0.1   | 0.2    | 0.1    | 0.1    | 0.1    | 0.0    | 0.1    |
| Col23a1  | 0.3    | 0.2    | 0.2    | 0.3   | 0.1    | 0.3   | 0.2    | 0.2    | 0.2    | 0.2    | 0.2    | 0.2    |
| Col24a1  | 0.0    | 0.0    | 0.0    | 0.0   | 0.0    | 0.0   | 0.0    | 0.1    | 0.1    | 0.1    | 0.1    | 0.1    |
| Col25a1  | 0.0    | 0.0    | 0.0    | 0.0   | 0.0    | 0.0   | 0.0    | 0.0    | 0.0    | 0.0    | 0.0    | 0.0    |
| Col26a1  | 0.0    | 0.1    | 0.0    | 0.0   | 0.0    | 0.0   | 0.0    | 0.1    | 0.0    | 0.0    | 0.0    | 0.0    |
| Col27a1  | 0.4    | 0.3    | 0.5    | 0.3   | 0.5    | 0.2   | 0.5    | 0.7    | 0.7    | 1.0    | 0.6    | 0.5    |
| Col28a1  | 8.4    | 14.5   | 28.7   | 5.5   | 21.6   | 1.3   | 38.9   | 26.5   | 49.5   | 10.8   | 18.2   | 20.5   |
| Col2a1   | 0.2    | 0.0    | 0.2    | 0.1   | 0.2    | 0.4   | 1.2    | 0.9    | 0.8    | 1.3    | 2.5    | 0.5    |
| Col3a1   | 1324.3 | 1836.6 | 2732.5 | 738.9 | 1244.5 | 544.6 | 1525.1 | 3090.8 | 2898.3 | 1828.3 | 1646.4 | 2457.6 |
| Col4a1   | 465.5  | 612.7  | 615.7  | 413.6 | 560.6  | 562.7 | 567.2  | 473.7  | 624.0  | 527.5  | 465.7  | 516.7  |
| Col4a2   | 235.0  | 295.8  | 331.8  | 233.5 | 284.1  | 285.5 | 311.9  | 269.8  | 311.6  | 246.0  | 221.3  | 257.4  |
| Col4a3   | 0.5    | 0.3    | 0.4    | 0.3   | 0.1    | 0.3   | 0.1    | 0.2    | 0.1    | 0.1    | 0.1    | 0.1    |
| Col4a3bp | 11.7   | 7.7    | 6.4    | 12.8  | 8.7    | 9.6   | 9.2    | 7.0    | 8.2    | 8.9    | 11.4   | 11.2   |
| Col4a4   | 0.4    | 0.2    | 0.4    | 0.1   | 0.1    | 0.3   | 0.1    | 0.2    | 0.1    | 0.0    | 0.0    | 0.1    |
| Col4a5   | 123.0  | 127.7  | 119.0  | 96.4  | 108.6  | 111.7 | 105.2  | 118.3  | 150.4  | 119.9  | 107.1  | 111.2  |
| Col4a6   | 17.2   | 13.8   | 11.9   | 13.6  | 12.8   | 13.2  | 13.5   | 12.8   | 22.0   | 29.1   | 21.1   | 21.1   |
| Col5a1   | 76.4   | 87.5   | 90.9   | 59.7  | 81.0   | 64.4  | 110.8  | 155.5  | 161.6  | 83.9   | 86.6   | 78.3   |
| Col5a2   | 1028.7 | 963.4  | 921.2  | 731.1 | 729.4  | 671.2 | 802.7  | 951.2  | 1069.1 | 743.2  | 785.0  | 816.5  |
| Col5a3   | 2.0    | 2.6    | 3.2    | 1.8   | 2.8    | 2.0   | 1.7    | 4.6    | 2.4    | 2.3    | 2.3    | 1.4    |
| Col6a1   | 156.9  | 210.9  | 356.2  | 110.8 | 263.1  | 95.4  | 301.1  | 316.2  | 313.2  | 252.6  | 270.0  | 358.6  |
| Col6a2   | 46.6   | 76.9   | 138.7  | 23.0  | 84.1   | 20.0  | 100.8  | 123.9  | 106.2  | 90.3   | 91.3   | 131.8  |
| Col6a3   | 1.3    | 1.9    | 3.9    | 0.8   | 2.9    | 1.6   | 2.1    | 5.0    | 3.3    | 4.8    | 4.6    | 3.5    |
| Col6a4   | 0.1    | 0.1    | 0.0    | 0.0   | 0.1    | 0.0   | 0.0    | 0.0    | 0.0    | 0.0    | 0.0    | 0.0    |
| Col6a5   | 0.0    | 0.0    | 0.0    | 0.0   | 0.0    | 0.0   | 0.0    | 0.0    | 0.0    | 0.0    | 0.0    | 0.0    |
| Col6a6   | 0.0    | 0.0    | 0.0    | 0.0   | 0.0    | 0.0   | 0.0    | 0.0    | 0.0    | 0.0    | 0.0    | 0.0    |
| Col7a1   | 0.6    | 0.8    | 0.6    | 1.0   | 0.8    | 1.1   | 0.7    | 0.3    | 0.6    | 0.5    | 0.3    | 0.3    |
| Col8a1   | 361.4  | 427.0  | 552.1  | 333.8 | 433.8  | 362.4 | 522.5  | 556.4  | 626.3  | 444.6  | 526.2  | 550.8  |
| Col8a2   | 0.9    | 1.3    | 2.2    | 0.3   | 0.6    | 0.6   | 0.9    | 2.5    | 1.7    | 2.8    | 4.1    | 1.8    |
| Col9a2   | 0.1    | 0.1    | 0.1    | 0.1   | 0.1    | 0.0   | 0.0    | 0.1    | 0.1    | 0.1    | 0.0    | 0.1    |
| Col9a3   | 0.2    | 0.3    | 0.2    | 0.2   | 0.3    | 0.4   | 0.2    | 0.1    | 0.2    | 0.3    | 0.2    | 0.2    |
| Colec10  | 0.0    | 0.0    | 0.0    | 0.1   | 0.0    | 0.1   | 0.0    | 0.0    | 0.0    | 0.0    | 0.0    | 0.0    |
| Colec11  | 3.3    | 4.7    | 5.9    | 2.9   | 4.1    | 2.6   | 3.7    | 2.7    | 3.3    | 8.5    | 3.3    | 6.3    |
| Colec12  | 38.1   | 55.2   | 81.3   | 33.0  | 45.3   | 38.6  | 41.7   | 54.2   | 56.6   | 68.1   | 49.6   | 66.4   |
| Colq     | 0.3    | 0.2    | 0.3    | 0.3   | 0.5    | 0.1   | 0.3    | 0.1    | 0.1    | 0.1    | 0.1    | 0.1    |
| Commd1   | 46.8   | 35.9   | 39.8   | 49.0  | 39.3   | 47.6  | 42.6   | 43.0   | 39.7   | 39.1   | 42.8   | 36.1   |
| Commd10  | 13.1   | 11.0   | 10.3   | 14.7  | 11.2   | 12.7  | 12.3   | 13.0   | 13.0   | 10.0   | 12.5   | 9.8    |
| Commd2   | 4.4    | 4.4    | 3.8    | 4.8   | 4.9    | 3.6   | 3.8    | 4.4    | 4.8    | 4.0    | 4.8    | 3.9    |
| Commd3   | 126.4  | 113.4  | 106.6  | 124.0 | 102.5  | 125.9 | 102.0  | 108.8  | 100.6  | 120.4  | 127.2  | 119.0  |
| Commd4   | 27.8   | 26.2   | 19.3   | 30.3  | 27.1   | 29.9  | 25.0   | 23.6   | 27.7   | 26.9   | 21.9   | 21.4   |
| Commd5   | 13.8   | 13.6   | 11.2   | 14.2  | 12.7   | 17.8  | 13.4   | 13.3   | 14.8   | 15.3   | 12.5   | 13.1   |
| Commd6   | 25.2   | 25.2   | 18.0   | 21.4  | 22.3   | 23.5  | 18.2   | 20.1   | 23.5   | 27.0   | 23.8   | 22.0   |
| Commd7   | 11.4   | 9.6    | 9.0    | 12.7  | 11.8   | 10.8  | 10.7   | 10.0   | 11.1   | 10.9   | 12.2   | 10.5   |
| Commd8   | 13.1   | 14.4   | 13.7   | 15.0  | 14.2   | 15.2  | 11.7   | 12.8   | 12.1   | 15.6   | 15.3   | 15.1   |
| Commd9   | 17.1   | 14.9   | 11.3   | 20.4  | 16.5   | 17.1  | 15.0   | 14.7   | 15.4   | 16.4   | 17.1   | 14.0   |
| Comp     | 3.0    | 4.1    | 15.6   | 0.6   | 2.0    | 0.7   | 5.4    | 21.7   | 8.1    | 4.3    | 7.5    | 15.0   |
| Comt     | 71.9   | 79.5   | 83.5   | 76.4  | 71.9   | 66.6  | 91.8   | 109.6  | 90.9   | 63.0   | 79.0   | 73.4   |

Online Table 1

|         |       |       |       |       |       |       |       |       |       |       |       |       |
|---------|-------|-------|-------|-------|-------|-------|-------|-------|-------|-------|-------|-------|
| Comtd1  | 7.8   | 5.7   | 3.9   | 7.7   | 6.1   | 9.2   | 5.0   | 5.0   | 5.3   | 5.9   | 5.2   | 5.1   |
| Copa    | 127.7 | 114.6 | 107.1 | 126.9 | 110.0 | 122.4 | 105.6 | 119.9 | 102.0 | 106.3 | 118.3 | 112.4 |
| Copb1   | 56.5  | 58.4  | 50.7  | 52.5  | 53.0  | 49.5  | 47.9  | 54.3  | 57.3  | 58.3  | 60.4  | 57.8  |
| Copb2   | 139.4 | 123.9 | 120.1 | 140.9 | 117.6 | 134.9 | 123.1 | 120.8 | 108.7 | 126.7 | 136.4 | 145.1 |
| Cope    | 68.8  | 62.8  | 58.1  | 77.1  | 68.9  | 67.0  | 63.1  | 73.7  | 63.0  | 62.9  | 67.4  | 63.1  |
| Copg1   | 69.2  | 60.7  | 55.5  | 71.1  | 63.0  | 65.8  | 66.5  | 67.0  | 58.2  | 62.8  | 68.6  | 62.6  |
| Copg2   | 25.1  | 21.5  | 16.1  | 20.2  | 17.7  | 23.5  | 14.3  | 17.7  | 17.3  | 17.0  | 19.4  | 16.3  |
| Coprs   | 19.0  | 18.4  | 11.6  | 17.2  | 14.4  | 21.8  | 14.7  | 12.2  | 14.3  | 17.1  | 13.7  | 14.7  |
| Cops2   | 33.1  | 40.4  | 43.6  | 44.0  | 40.5  | 44.9  | 38.5  | 39.9  | 39.7  | 45.0  | 52.0  | 50.1  |
| Cops3   | 44.3  | 41.4  | 40.7  | 43.5  | 35.8  | 39.8  | 35.2  | 37.1  | 35.9  | 42.1  | 47.3  | 42.7  |
| Cops4   | 40.9  | 36.6  | 34.2  | 42.5  | 34.8  | 38.3  | 37.9  | 34.0  | 33.5  | 41.9  | 41.7  | 41.1  |
| Cops5   | 51.7  | 44.4  | 39.7  | 43.3  | 43.4  | 41.3  | 40.9  | 42.2  | 47.0  | 46.3  | 47.5  | 42.8  |
| Cops6   | 45.5  | 46.3  | 41.5  | 42.5  | 41.9  | 42.0  | 39.6  | 45.4  | 41.9  | 45.9  | 41.6  | 42.7  |
| Cops7a  | 31.1  | 30.9  | 28.7  | 36.2  | 31.0  | 32.3  | 35.2  | 33.2  | 29.3  | 29.9  | 30.2  | 25.7  |
| Cops7b  | 4.6   | 4.9   | 3.6   | 4.4   | 4.5   | 5.3   | 5.0   | 5.4   | 4.3   | 4.2   | 5.3   | 3.9   |
| Cops8   | 30.6  | 29.7  | 22.7  | 29.2  | 27.0  | 28.7  | 25.4  | 26.2  | 26.1  | 26.2  | 26.9  | 25.1  |
| Copz1   | 32.0  | 33.5  | 28.4  | 32.2  | 31.5  | 32.1  | 29.5  | 35.9  | 29.4  | 34.3  | 29.9  | 29.7  |
| Copz2   | 116.2 | 88.6  | 92.3  | 127.5 | 84.0  | 120.0 | 113.5 | 103.6 | 98.2  | 95.6  | 113.0 | 114.4 |
| Coq10a  | 4.7   | 4.1   | 3.5   | 4.2   | 3.6   | 5.7   | 3.2   | 3.8   | 3.7   | 3.7   | 3.7   | 4.1   |
| Coq10b  | 35.1  | 37.7  | 30.0  | 30.9  | 32.1  | 31.3  | 31.7  | 32.1  | 40.9  | 39.0  | 39.3  | 36.3  |
| Coq2    | 24.8  | 22.9  | 18.8  | 26.8  | 21.9  | 26.9  | 23.3  | 18.2  | 23.2  | 22.6  | 24.1  | 20.5  |
| Coq3    | 6.7   | 6.2   | 4.9   | 6.0   | 5.1   | 6.8   | 5.3   | 4.9   | 4.3   | 4.9   | 5.9   | 5.5   |
| Coq4    | 2.6   | 2.0   | 2.3   | 3.0   | 2.4   | 3.2   | 2.4   | 2.6   | 2.1   | 2.4   | 2.3   | 1.8   |
| Coq5    | 11.3  | 10.2  | 9.3   | 11.0  | 9.8   | 12.4  | 8.7   | 9.0   | 8.8   | 8.6   | 8.8   | 10.6  |
| Coq6    | 7.1   | 5.9   | 4.7   | 6.6   | 5.6   | 6.1   | 4.8   | 5.4   | 5.9   | 5.5   | 5.1   | 5.5   |
| Coq7    | 13.6  | 11.5  | 11.3  | 13.9  | 10.6  | 14.2  | 10.0  | 10.2  | 8.1   | 9.3   | 9.2   | 10.8  |
| Coq9    | 15.0  | 13.5  | 12.7  | 14.5  | 11.9  | 15.1  | 12.1  | 14.7  | 12.3  | 13.2  | 12.2  | 12.7  |
| Corin   | 0.1   | 0.1   | 0.1   | 0.0   | 0.0   | 0.0   | 0.0   | 0.0   | 0.0   | 0.1   | 0.0   | 0.0   |
| Coro1a  | 2.6   | 0.1   | 0.1   | 21.2  | 50.2  | 0.2   | 7.2   | 0.6   | 1.5   | 3.5   | 0.9   | 2.0   |
| Coro1b  | 57.6  | 54.6  | 53.6  | 64.1  | 70.4  | 61.8  | 55.1  | 62.7  | 56.5  | 59.2  | 55.3  | 61.2  |
| Coro1c  | 51.9  | 42.4  | 35.1  | 67.7  | 55.3  | 48.2  | 60.3  | 42.6  | 48.8  | 41.8  | 53.4  | 45.4  |
| Coro2a  | 0.1   | 0.0   | 0.0   | 1.4   | 2.9   | 0.0   | 0.4   | 0.1   | 0.1   | 0.1   | 0.1   | 0.2   |
| Coro2b  | 0.5   | 0.6   | 1.2   | 0.6   | 0.5   | 0.9   | 0.6   | 0.9   | 0.4   | 0.5   | 0.9   | 0.5   |
| Coro6   | 0.2   | 0.2   | 0.1   | 0.1   | 0.2   | 0.3   | 0.2   | 0.1   | 0.1   | 0.2   | 0.5   | 0.1   |
| Coro7   | 3.5   | 3.3   | 2.8   | 3.8   | 4.6   | 3.2   | 3.4   | 2.9   | 3.3   | 2.5   | 2.7   | 2.5   |
| Cotl1   | 10.5  | 10.2  | 10.8  | 23.5  | 39.1  | 10.8  | 11.6  | 8.6   | 9.5   | 12.3  | 9.3   | 7.8   |
| Cox10   | 2.5   | 2.3   | 1.9   | 3.0   | 2.4   | 2.4   | 2.2   | 2.3   | 2.5   | 2.2   | 2.4   | 1.7   |
| Cox11   | 2.1   | 2.5   | 2.0   | 1.7   | 2.3   | 2.5   | 2.1   | 2.3   | 2.4   | 2.7   | 2.7   | 2.0   |
| Cox14   | 34.6  | 32.2  | 21.7  | 30.6  | 34.1  | 34.5  | 24.7  | 31.3  | 33.1  | 39.9  | 26.1  | 27.8  |
| Cox15   | 4.6   | 4.1   | 4.3   | 4.1   | 4.0   | 4.5   | 3.7   | 4.9   | 4.7   | 3.5   | 4.1   | 4.0   |
| Cox16   | 6.2   | 6.2   | 6.5   | 7.9   | 6.8   | 6.8   | 6.8   | 7.0   | 6.3   | 6.3   | 7.7   | 7.9   |
| Cox17   | 87.1  | 72.4  | 51.8  | 77.9  | 72.3  | 96.6  | 62.5  | 53.4  | 56.1  | 74.0  | 60.0  | 66.8  |
| Cox18   | 8.3   | 8.7   | 6.8   | 7.8   | 7.9   | 8.1   | 9.0   | 8.0   | 7.3   | 7.8   | 8.4   | 7.6   |
| Cox19   | 32.0  | 33.0  | 21.8  | 28.5  | 25.0  | 27.9  | 25.4  | 23.3  | 22.7  | 30.2  | 24.5  | 26.7  |
| Cox20   | 38.3  | 35.5  | 39.7  | 44.4  | 32.7  | 41.8  | 39.3  | 39.6  | 34.7  | 41.0  | 46.2  | 41.0  |
| Cox4i1  | 418.0 | 320.0 | 277.1 | 354.0 | 334.2 | 368.8 | 281.5 | 302.3 | 291.9 | 355.4 | 311.5 | 303.5 |
| Cox4i2  | 0.4   | 1.6   | 2.3   | 0.3   | 0.5   | 0.5   | 0.7   | 0.6   | 0.5   | 0.3   | 0.8   | 0.5   |
| Cox5a   | 96.0  | 70.2  | 50.8  | 67.1  | 83.7  | 71.1  | 56.0  | 64.5  | 69.4  | 74.6  | 66.8  | 68.1  |
| Cox5b   | 163.6 | 130.8 | 122.9 | 146.1 | 124.5 | 130.8 | 133.7 | 141.4 | 128.7 | 146.0 | 152.9 | 148.6 |
| Cox6a1  | 294.8 | 257.2 | 206.0 | 289.9 | 255.5 | 242.9 | 242.9 | 232.7 | 245.8 | 259.4 | 262.8 | 243.8 |
| Cox6a2  | 3.5   | 1.7   | 1.2   | 6.1   | 0.6   | 3.5   | 1.0   | 2.4   | 1.4   | 0.9   | 1.7   | 1.0   |
| Cox6b1  | 358.4 | 282.8 | 262.5 | 358.8 | 278.6 | 327.9 | 291.9 | 280.9 | 257.7 | 298.5 | 322.3 | 319.2 |
| Cox6b2  | 6.0   | 7.3   | 6.0   | 1.7   | 4.2   | 2.1   | 3.5   | 1.9   | 3.9   | 10.0  | 4.4   | 2.5   |
| Cox6c   | 292.9 | 236.2 | 231.6 | 256.5 | 244.9 | 285.5 | 201.8 | 207.6 | 222.0 | 269.2 | 253.8 | 254.2 |
| Cox7a1  | 1.8   | 1.0   | 0.9   | 0.9   | 2.1   | 0.7   | 0.5   | 0.2   | 1.2   | 2.5   | 2.0   | 2.9   |
| Cox7a2  | 129.1 | 110.9 | 90.8  | 108.7 | 110.7 | 109.9 | 95.8  | 86.3  | 99.2  | 114.7 | 109.7 | 103.6 |
| Cox7a2l | 203.7 | 141.5 | 156.5 | 183.4 | 162.8 | 204.1 | 155.9 | 167.3 | 149.5 | 175.8 | 180.9 | 176.5 |

Online Table 1

|         |       |       |       |       |       |       |       |       |       |       |       |       |
|---------|-------|-------|-------|-------|-------|-------|-------|-------|-------|-------|-------|-------|
| Cox7b   | 95.2  | 79.7  | 69.0  | 89.6  | 79.6  | 84.0  | 74.1  | 83.1  | 71.5  | 85.2  | 96.6  | 86.8  |
| Cox7c   | 169.3 | 148.1 | 128.8 | 160.7 | 142.6 | 164.9 | 136.2 | 134.8 | 143.3 | 163.3 | 143.9 | 145.7 |
| Cox8a   | 312.7 | 256.5 | 216.9 | 286.6 | 265.2 | 278.1 | 233.9 | 223.7 | 245.4 | 306.8 | 260.4 | 238.0 |
| Cp      | 17.6  | 15.8  | 25.0  | 19.8  | 19.4  | 17.2  | 15.7  | 15.7  | 13.4  | 10.0  | 9.3   | 11.6  |
| Cpa1    | 0.0   | 0.0   | 0.0   | 0.0   | 0.0   | 0.0   | 0.1   | 0.0   | 0.0   | 0.0   | 0.2   | 0.0   |
| Cpa2    | 0.1   | 0.0   | 0.0   | 0.2   | 0.0   | 0.2   | 0.0   | 0.0   | 0.1   | 0.1   | 0.0   | 0.0   |
| Cpa3    | 0.1   | 0.2   | 0.1   | 0.0   | 0.1   | 0.0   | 0.1   | 0.1   | 0.1   | 0.2   | 0.0   | 0.0   |
| Cpa4    | 0.1   | 0.0   | 0.0   | 0.1   | 0.0   | 0.0   | 0.0   | 0.0   | 0.0   | 0.0   | 0.1   | 0.0   |
| Cpa6    | 0.3   | 0.1   | 0.0   | 0.1   | 0.3   | 0.3   | 0.3   | 0.2   | 0.3   | 0.0   | 0.1   | 0.2   |
| Cpb1    | 0.0   | 0.1   | 0.1   | 0.1   | 0.0   | 0.0   | 0.0   | 0.0   | 0.0   | 0.0   | 0.0   | 0.0   |
| Cpb2    | 0.0   | 0.0   | 0.1   | 0.0   | 0.0   | 0.0   | 0.0   | 0.0   | 0.0   | 0.0   | 0.0   | 0.0   |
| Cpd     | 50.3  | 70.0  | 58.6  | 51.6  | 69.1  | 35.2  | 56.3  | 46.9  | 52.5  | 45.4  | 48.4  | 53.5  |
| Cpe     | 255.9 | 204.5 | 193.4 | 122.6 | 168.5 | 244.8 | 172.9 | 206.1 | 183.0 | 294.6 | 286.5 | 249.0 |
| Cpeb1   | 14.4  | 12.0  | 9.4   | 20.1  | 11.6  | 20.4  | 10.8  | 8.0   | 8.1   | 9.6   | 9.3   | 9.3   |
| Cpeb2   | 0.8   | 0.8   | 0.8   | 1.0   | 1.4   | 0.8   | 0.9   | 1.0   | 0.8   | 1.0   | 0.9   | 0.8   |
| Cpeb3   | 0.7   | 0.9   | 0.9   | 1.0   | 1.0   | 0.9   | 0.8   | 0.7   | 0.6   | 0.5   | 0.8   | 0.7   |
| Cpeb4   | 6.6   | 7.5   | 6.4   | 9.3   | 8.7   | 6.2   | 6.3   | 5.3   | 6.7   | 7.0   | 6.3   | 7.1   |
| Cped1   | 20.9  | 19.1  | 20.7  | 16.7  | 13.6  | 20.1  | 13.5  | 17.0  | 16.4  | 12.2  | 14.8  | 20.4  |
| Cphx1   | 0.1   | 0.0   | 0.0   | 0.1   | 0.0   | 0.1   | 0.0   | 0.0   | 0.0   | 0.0   | 0.1   | 0.0   |
| Cphx2   | 0.0   | 0.0   | 0.0   | 0.0   | 0.0   | 0.0   | 0.0   | 0.0   | 0.0   | 0.0   | 0.0   | 0.0   |
| Cplx2   | 0.9   | 0.7   | 0.8   | 0.9   | 0.4   | 0.8   | 0.8   | 0.6   | 0.6   | 1.3   | 1.4   | 1.1   |
| Cplx3   | 0.1   | 0.1   | 0.1   | 0.1   | 0.1   | 0.1   | 0.1   | 0.0   | 0.0   | 0.0   | 0.1   | 0.1   |
| Cpm     | 0.2   | 0.2   | 0.2   | 0.2   | 0.3   | 0.1   | 0.2   | 0.1   | 0.1   | 0.4   | 0.1   | 0.1   |
| Cpne1   | 17.1  | 20.1  | 23.3  | 17.4  | 21.3  | 17.5  | 22.4  | 24.5  | 23.2  | 21.1  | 20.1  | 23.2  |
| Cpne2   | 9.3   | 9.4   | 9.7   | 12.4  | 9.4   | 11.1  | 8.7   | 8.7   | 8.2   | 6.5   | 7.4   | 7.9   |
| Cpne3   | 23.2  | 22.8  | 21.7  | 25.3  | 22.6  | 24.9  | 21.5  | 20.0  | 20.7  | 22.3  | 26.3  | 22.4  |
| Cpne4   | 0.0   | 0.0   | 0.0   | 0.0   | 0.0   | 0.0   | 0.0   | 0.0   | 0.0   | 0.0   | 0.0   | 0.0   |
| Cpne5   | 0.8   | 0.6   | 0.3   | 1.2   | 0.7   | 1.4   | 0.6   | 0.2   | 0.4   | 0.5   | 0.4   | 0.3   |
| Cpne7   | 0.0   | 0.0   | 0.0   | 0.0   | 0.0   | 0.1   | 0.0   | 0.0   | 0.0   | 0.1   | 0.0   | 0.0   |
| Cpne8   | 44.8  | 44.9  | 39.7  | 43.1  | 42.8  | 37.0  | 41.6  | 31.6  | 46.3  | 42.8  | 44.8  | 47.2  |
| Cpne9   | 0.0   | 0.0   | 0.0   | 0.0   | 0.0   | 0.0   | 0.0   | 0.0   | 0.0   | 0.0   | 0.0   | 0.0   |
| Cpox    | 10.4  | 9.3   | 10.6  | 8.0   | 7.5   | 9.5   | 8.0   | 10.0  | 8.1   | 8.1   | 9.7   | 8.3   |
| Cpped1  | 14.7  | 15.6  | 15.2  | 14.2  | 14.2  | 14.4  | 14.6  | 12.8  | 12.6  | 15.9  | 14.7  | 14.9  |
| Cpq     | 120.0 | 115.6 | 98.6  | 94.3  | 78.3  | 122.0 | 68.4  | 61.1  | 72.0  | 83.7  | 80.3  | 71.3  |
| Cps1    | 0.0   | 0.0   | 0.0   | 0.0   | 0.0   | 0.0   | 0.0   | 0.0   | 0.0   | 0.0   | 0.0   | 0.0   |
| Cpsf1   | 8.6   | 8.9   | 7.2   | 9.0   | 9.9   | 9.9   | 7.8   | 8.5   | 7.8   | 7.7   | 7.8   | 7.0   |
| Cpsf2   | 12.0  | 12.0  | 12.0  | 11.5  | 11.6  | 11.4  | 11.9  | 11.7  | 11.8  | 11.7  | 12.4  | 12.8  |
| Cpsf3   | 24.8  | 23.2  | 21.6  | 26.2  | 22.8  | 25.9  | 20.1  | 22.5  | 17.0  | 20.7  | 22.3  | 21.1  |
| Cpsf3l  | 12.4  | 12.3  | 11.2  | 12.4  | 12.2  | 11.8  | 12.4  | 11.7  | 12.1  | 11.2  | 11.3  | 10.8  |
| Cpsf4   | 3.8   | 4.1   | 3.7   | 4.2   | 4.9   | 4.6   | 4.7   | 4.9   | 4.3   | 4.2   | 4.1   | 3.8   |
| Cpsf4l  | 0.0   | 0.1   | 0.1   | 0.0   | 0.1   | 0.0   | 0.3   | 0.1   | 0.1   | 0.1   | 0.1   | 0.1   |
| Cpsf6   | 5.9   | 7.3   | 8.5   | 6.5   | 6.8   | 7.2   | 7.1   | 7.8   | 6.4   | 7.2   | 7.9   | 8.0   |
| Cpsf7   | 5.2   | 5.6   | 6.2   | 5.8   | 5.2   | 5.2   | 6.3   | 6.9   | 5.3   | 5.2   | 5.9   | 5.8   |
| Cpt1a   | 18.0  | 11.7  | 11.9  | 26.3  | 19.6  | 19.8  | 15.1  | 18.3  | 13.8  | 21.7  | 14.5  | 18.9  |
| Cpt1b   | 0.0   | 0.3   | 0.1   | 0.5   | 0.1   | 0.2   | 0.2   | 0.2   | 0.3   | 0.3   | 0.2   | 0.1   |
| Cpt1c   | 17.2  | 17.3  | 17.6  | 14.2  | 14.9  | 18.5  | 15.6  | 14.7  | 16.6  | 20.5  | 14.9  | 14.3  |
| Cpt2    | 10.0  | 15.0  | 13.8  | 10.3  | 10.6  | 10.2  | 10.4  | 17.7  | 13.1  | 13.6  | 13.1  | 11.4  |
| Cpxm1   | 6.2   | 16.1  | 28.1  | 4.1   | 13.8  | 2.2   | 4.6   | 13.9  | 10.4  | 25.1  | 7.3   | 14.6  |
| Cpxm2   | 3.7   | 3.2   | 7.3   | 0.7   | 2.0   | 0.6   | 4.1   | 9.6   | 6.0   | 6.8   | 10.3  | 13.5  |
| Cpz     | 0.4   | 0.4   | 0.5   | 0.4   | 0.5   | 0.0   | 0.3   | 0.5   | 0.9   | 8.2   | 2.6   | 2.3   |
| Cr1l    | 28.7  | 24.6  | 26.5  | 34.0  | 26.0  | 24.6  | 28.0  | 28.2  | 27.6  | 25.9  | 27.6  | 29.8  |
| Cr2     | 0.0   | 0.0   | 0.0   | 0.0   | 0.0   | 0.0   | 0.0   | 0.0   | 0.0   | 0.0   | 0.0   | 0.1   |
| Crabp1  | 1.3   | 0.7   | 2.4   | 0.3   | 0.5   | 0.3   | 0.6   | 2.7   | 0.8   | 0.2   | 0.8   | 1.1   |
| Crabp2  | 2.9   | 0.7   | 0.2   | 0.7   | 0.4   | 0.7   | 0.3   | 1.4   | 0.9   | 1.7   | 2.7   | 2.4   |
| Cradd   | 3.6   | 3.2   | 3.2   | 2.9   | 3.3   | 3.1   | 3.0   | 3.0   | 2.7   | 2.9   | 1.5   | 3.1   |
| Cramp1l | 1.9   | 2.4   | 2.3   | 1.7   | 2.2   | 1.8   | 2.2   | 2.0   | 2.3   | 2.0   | 1.9   | 1.7   |
| Crat    | 9.5   | 9.2   | 9.3   | 10.2  | 10.2  | 9.8   | 12.1  | 10.3  | 10.8  | 8.5   | 10.3  | 10.0  |

Online Table 1



|          |       |       |       |       |       |       |       |       |       |       |       |       |
|----------|-------|-------|-------|-------|-------|-------|-------|-------|-------|-------|-------|-------|
| Crb2     | 0.7   | 0.3   | 0.3   | 0.4   | 0.4   | 0.3   | 0.6   | 0.4   | 1.1   | 3.3   | 1.5   | 1.1   |
| Crbn     | 12.4  | 12.3  | 11.7  | 16.1  | 13.1  | 14.5  | 12.3  | 10.8  | 11.2  | 12.6  | 13.4  | 13.9  |
| Crcp     | 16.6  | 11.3  | 10.5  | 18.0  | 15.2  | 17.7  | 17.0  | 14.3  | 14.6  | 13.9  | 19.6  | 15.2  |
| Crct1    | 12.3  | 2.9   | 0.7   | 3.4   | 1.1   | 3.1   | 1.7   | 0.2   | 0.3   | 2.0   | 2.6   | 2.0   |
| Creb1    | 4.2   | 5.0   | 6.2   | 4.3   | 5.0   | 4.6   | 4.8   | 5.5   | 4.9   | 4.8   | 5.8   | 5.5   |
| Creb3    | 67.9  | 51.0  | 44.8  | 67.1  | 51.7  | 54.0  | 67.3  | 45.4  | 57.3  | 66.9  | 66.7  | 63.9  |
| Creb3l1  | 2.7   | 3.0   | 3.6   | 2.7   | 3.5   | 2.3   | 4.6   | 7.2   | 6.5   | 4.9   | 5.9   | 4.8   |
| Creb3l2  | 13.0  | 14.7  | 14.4  | 13.8  | 16.2  | 13.1  | 19.6  | 14.7  | 15.8  | 15.8  | 15.7  | 15.5  |
| Creb3l3  | 0.3   | 0.2   | 0.3   | 0.1   | 0.1   | 0.1   | 0.3   | 0.4   | 0.2   | 0.3   | 0.2   | 0.3   |
| Creb3l4  | 1.5   | 1.4   | 1.5   | 1.7   | 1.3   | 1.5   | 1.1   | 1.2   | 1.1   | 0.7   | 1.7   | 1.3   |
| Creb5    | 0.1   | 0.0   | 0.0   | 0.2   | 0.6   | 0.0   | 0.1   | 0.0   | 0.0   | 0.1   | 0.1   | 0.0   |
| Crebbp   | 4.9   | 6.5   | 7.4   | 5.8   | 6.2   | 5.0   | 7.4   | 6.8   | 6.3   | 5.3   | 5.8   | 5.0   |
| Crebl2   | 17.8  | 13.9  | 10.8  | 20.5  | 11.7  | 19.7  | 10.4  | 7.8   | 10.5  | 13.3  | 11.5  | 12.9  |
| Crebrf   | 12.2  | 12.3  | 12.9  | 15.0  | 10.4  | 14.9  | 9.3   | 9.6   | 10.0  | 12.6  | 11.9  | 14.3  |
| Crebzf   | 11.6  | 8.6   | 8.9   | 9.4   | 8.1   | 8.8   | 8.2   | 9.5   | 11.8  | 11.0  | 8.9   | 10.4  |
| Creg1    | 68.6  | 60.1  | 53.6  | 125.3 | 119.0 | 84.2  | 43.2  | 45.1  | 36.0  | 59.9  | 46.1  | 54.6  |
| Creg2    | 0.0   | 0.0   | 0.0   | 0.4   | 0.6   | 0.0   | 0.1   | 0.0   | 0.0   | 0.0   | 0.0   | 0.0   |
| Creld1   | 25.0  | 23.5  | 22.4  | 27.5  | 23.5  | 28.9  | 22.2  | 24.5  | 24.1  | 24.4  | 23.7  | 20.6  |
| Creld2   | 47.0  | 36.3  | 29.7  | 56.5  | 35.9  | 38.8  | 37.1  | 35.2  | 33.8  | 39.0  | 36.9  | 38.1  |
| Crem     | 3.4   | 2.6   | 2.3   | 4.7   | 3.2   | 3.4   | 2.6   | 2.0   | 2.1   | 3.1   | 2.2   | 1.9   |
| Crhbp    | 0.1   | 0.0   | 0.1   | 0.1   | 0.1   | 0.1   | 0.1   | 0.2   | 0.1   | 0.0   | 0.0   | 0.0   |
| Crim1    | 74.7  | 72.0  | 73.1  | 69.6  | 54.9  | 70.9  | 80.4  | 51.3  | 84.1  | 68.9  | 70.0  | 74.0  |
| Crip1    | 155.4 | 161.5 | 150.3 | 82.7  | 155.2 | 117.2 | 135.4 | 181.0 | 168.0 | 451.4 | 258.6 | 234.9 |
| Crip2    | 131.4 | 136.2 | 121.4 | 167.1 | 136.9 | 154.1 | 149.3 | 180.1 | 119.5 | 97.6  | 139.5 | 106.8 |
| Cript    | 32.6  | 31.1  | 25.8  | 32.7  | 34.5  | 31.4  | 26.9  | 26.6  | 32.5  | 33.5  | 33.1  | 32.8  |
| Crisp2   | 0.1   | 0.2   | 0.0   | 0.1   | 0.1   | 0.0   | 0.2   | 0.1   | 0.0   | 0.3   | 0.1   | 0.1   |
| Crispld1 | 0.1   | 0.0   | 0.2   | 0.0   | 0.0   | 0.0   | 0.1   | 0.0   | 0.0   | 0.0   | 0.0   | 0.1   |
| Crispld2 | 4.4   | 8.6   | 13.0  | 3.7   | 5.7   | 2.8   | 4.7   | 8.5   | 9.8   | 3.9   | 4.6   | 6.3   |
| Crk      | 40.4  | 46.5  | 43.1  | 42.2  | 46.6  | 40.2  | 49.7  | 44.5  | 51.9  | 49.8  | 52.7  | 53.0  |
| Crkl     | 10.0  | 11.3  | 9.7   | 10.2  | 11.0  | 9.1   | 10.2  | 10.7  | 11.7  | 10.8  | 10.5  | 10.2  |
| Crlf1    | 56.0  | 49.6  | 34.0  | 38.4  | 43.9  | 89.8  | 111.6 | 84.1  | 101.4 | 68.2  | 71.9  | 79.2  |
| Crlf2    | 12.1  | 9.5   | 9.4   | 11.6  | 13.2  | 10.5  | 12.2  | 11.5  | 10.6  | 11.2  | 9.7   | 10.6  |
| Crlf3    | 7.8   | 8.2   | 6.7   | 7.9   | 9.6   | 7.9   | 8.2   | 6.4   | 7.6   | 7.2   | 8.9   | 7.7   |
| Crls1    | 22.1  | 20.0  | 16.6  | 23.8  | 17.6  | 20.7  | 17.8  | 19.1  | 20.6  | 29.9  | 29.0  | 26.5  |
| Crmp1    | 0.5   | 0.2   | 0.2   | 0.4   | 0.2   | 0.3   | 0.5   | 0.3   | 0.3   | 0.0   | 0.1   | 0.1   |
| Crnk1l   | 16.0  | 16.6  | 16.4  | 15.7  | 14.6  | 15.1  | 15.3  | 17.4  | 13.4  | 15.7  | 16.2  | 18.7  |
| Crocc    | 1.2   | 1.4   | 1.6   | 0.9   | 1.0   | 1.6   | 1.2   | 1.3   | 1.4   | 1.3   | 1.3   | 1.1   |
| Crot     | 28.0  | 27.6  | 26.0  | 26.4  | 27.1  | 25.0  | 22.6  | 23.5  | 24.2  | 34.0  | 27.2  | 29.4  |
| Crtac1   | 0.0   | 0.0   | 0.0   | 0.0   | 0.0   | 0.0   | 0.0   | 0.0   | 0.0   | 0.0   | 0.0   | 0.0   |
| Crtap    | 87.6  | 75.5  | 82.1  | 80.9  | 76.2  | 83.6  | 91.9  | 78.1  | 80.5  | 87.2  | 76.1  | 88.3  |
| Crtc1    | 0.6   | 0.7   | 0.7   | 0.7   | 0.7   | 0.7   | 0.8   | 1.0   | 0.7   | 0.7   | 0.5   | 0.4   |
| Crtc2    | 1.9   | 2.6   | 2.2   | 2.4   | 2.4   | 2.0   | 2.7   | 2.6   | 2.2   | 2.0   | 1.7   | 1.7   |
| Crtc3    | 4.4   | 6.5   | 7.9   | 4.2   | 4.7   | 4.1   | 5.8   | 6.2   | 6.6   | 4.4   | 4.4   | 5.2   |
| Crx      | 0.0   | 0.0   | 0.0   | 0.0   | 0.0   | 0.1   | 0.0   | 0.0   | 0.0   | 0.0   | 0.0   | 0.0   |
| Cry1     | 1.2   | 1.3   | 1.3   | 0.9   | 1.2   | 1.5   | 1.4   | 1.5   | 1.7   | 1.2   | 1.6   | 1.4   |
| Cry2     | 5.1   | 5.5   | 4.8   | 5.2   | 4.5   | 5.8   | 4.6   | 4.6   | 4.3   | 3.7   | 4.2   | 3.4   |
| Cryab    | 268.5 | 328.7 | 273.3 | 324.1 | 205.7 | 341.6 | 226.4 | 275.3 | 221.9 | 293.9 | 294.0 | 268.6 |
| Cryba1   | 0.1   | 0.2   | 0.1   | 0.2   | 0.1   | 0.1   | 0.0   | 0.1   | 0.1   | 0.0   | 0.1   | 0.0   |
| Cryba4   | 0.2   | 0.0   | 0.1   | 0.0   | 0.2   | 0.1   | 0.0   | 0.0   | 0.1   | 0.1   | 0.2   | 0.0   |
| Crybb1   | 0.1   | 0.1   | 0.1   | 0.0   | 0.0   | 0.0   | 0.0   | 0.0   | 0.0   | 0.1   | 0.0   | 0.0   |
| Crybb3   | 0.1   | 0.1   | 0.0   | 0.1   | 0.1   | 0.2   | 0.2   | 0.1   | 0.2   | 0.3   | 0.2   | 0.1   |
| Crygf    | 0.0   | 0.0   | 0.0   | 0.0   | 0.0   | 0.0   | 0.0   | 0.0   | 0.0   | 0.0   | 0.0   | 0.0   |
| Crygn    | 0.3   | 0.1   | 0.0   | 0.0   | 0.2   | 0.1   | 0.0   | 0.1   | 0.1   | 0.2   | 0.1   | 0.1   |
| Crygs    | 0.1   | 0.5   | 0.3   | 0.2   | 0.1   | 0.1   | 0.4   | 0.1   | 0.3   | 0.0   | 0.5   | 0.3   |
| Cryl1    | 4.5   | 6.6   | 4.9   | 5.2   | 4.7   | 5.3   | 3.8   | 4.6   | 3.6   | 4.3   | 3.6   | 3.4   |
| Crym     | 2.3   | 1.6   | 1.8   | 1.0   | 1.7   | 0.8   | 0.8   | 1.2   | 0.5   | 0.7   | 0.6   | 0.6   |
| Cryz     | 4.5   | 4.3   | 4.5   | 3.6   | 3.1   | 6.2   | 2.2   | 3.7   | 2.6   | 3.7   | 2.9   | 3.4   |

Online Table 1

|            |       |       |       |       |       |       |       |       |       |       |       |       |
|------------|-------|-------|-------|-------|-------|-------|-------|-------|-------|-------|-------|-------|
| Cryzl1     | 12.4  | 13.6  | 13.2  | 13.8  | 10.6  | 13.7  | 11.1  | 12.2  | 12.3  | 12.8  | 12.7  | 14.1  |
| Cs         | 58.3  | 56.0  | 50.1  | 57.8  | 58.0  | 56.3  | 59.2  | 59.2  | 56.0  | 51.0  | 61.5  | 53.8  |
| Csad       | 14.0  | 16.6  | 16.2  | 9.7   | 12.1  | 13.8  | 10.7  | 12.8  | 15.4  | 13.7  | 11.4  | 13.4  |
| Csda       | 62.4  | 50.2  | 46.2  | 64.7  | 45.0  | 62.9  | 64.6  | 65.3  | 48.7  | 50.0  | 66.0  | 47.9  |
| Csdc2      | 1.5   | 2.4   | 2.8   | 1.5   | 1.7   | 1.6   | 2.5   | 3.8   | 2.4   | 2.5   | 2.3   | 2.1   |
| Csde1      | 270.5 | 191.5 | 170.3 | 289.3 | 187.8 | 280.2 | 155.6 | 156.1 | 139.7 | 166.8 | 197.7 | 182.8 |
| Cse1l      | 12.3  | 14.0  | 14.5  | 12.8  | 15.4  | 12.5  | 15.5  | 15.1  | 15.4  | 15.1  | 15.3  | 13.2  |
| Csf1       | 408.2 | 364.8 | 331.7 | 453.8 | 437.3 | 491.7 | 547.6 | 256.4 | 351.7 | 374.7 | 360.3 | 343.8 |
| Csf1r      | 6.6   | 2.3   | 1.7   | 35.2  | 61.2  | 1.7   | 7.4   | 2.0   | 2.1   | 5.0   | 2.9   | 4.4   |
| Csf2       | 0.1   | 0.2   | 0.2   | 0.0   | 0.2   | 0.2   | 0.3   | 0.0   | 0.1   | 0.0   | 0.0   | 0.1   |
| Csf2ra     | 3.4   | 2.4   | 3.2   | 9.3   | 12.5  | 3.0   | 3.7   | 2.8   | 3.1   | 2.5   | 2.3   | 3.0   |
| Csf2rb     | 0.1   | 0.0   | 0.1   | 1.6   | 1.7   | 0.0   | 0.1   | 0.2   | 0.0   | 0.1   | 0.0   | 0.1   |
| Csf2rb2    | 0.1   | 0.0   | 0.1   | 0.4   | 0.5   | 0.0   | 0.1   | 0.2   | 0.1   | 0.0   | 0.0   | 0.1   |
| Csf3r      | 0.0   | 0.0   | 0.0   | 0.3   | 0.2   | 0.0   | 0.0   | 0.0   | 0.0   | 0.0   | 0.0   | 0.0   |
| Csgalnact1 | 16.2  | 22.3  | 30.9  | 18.7  | 31.4  | 12.6  | 40.6  | 33.4  | 38.9  | 20.4  | 22.7  | 31.1  |
| Csgalnact2 | 20.6  | 15.6  | 15.5  | 21.4  | 15.1  | 22.3  | 15.9  | 13.0  | 13.8  | 16.7  | 18.4  | 19.3  |
| Csk        | 13.6  | 17.1  | 13.7  | 20.1  | 23.8  | 16.9  | 18.2  | 13.6  | 16.4  | 14.4  | 14.9  | 12.9  |
| Csl        | 0.1   | 0.2   | 0.2   | 0.4   | 0.1   | 0.2   | 0.2   | 0.2   | 0.2   | 0.2   | 0.2   | 0.2   |
| Csmd1      | 0.0   | 0.0   | 0.0   | 0.0   | 0.1   | 0.0   | 0.0   | 0.0   | 0.0   | 0.0   | 0.0   | 0.0   |
| Csmd3      | 0.0   | 0.0   | 0.0   | 0.0   | 0.0   | 0.0   | 0.0   | 0.0   | 0.0   | 0.0   | 0.0   | 0.0   |
| Csnk1a1    | 93.1  | 101.5 | 118.0 | 95.9  | 92.3  | 108.8 | 90.4  | 112.7 | 95.5  | 109.0 | 109.3 | 110.8 |
| Csnk1d     | 22.8  | 25.9  | 24.6  | 20.7  | 23.2  | 20.8  | 25.3  | 25.6  | 25.1  | 25.0  | 24.4  | 22.9  |
| Csnk1e     | 17.3  | 18.7  | 16.6  | 17.1  | 15.2  | 19.1  | 18.0  | 14.7  | 16.8  | 14.5  | 17.5  | 15.2  |
| Csnk1g1    | 5.2   | 6.3   | 6.5   | 5.7   | 6.2   | 6.0   | 6.5   | 6.4   | 6.3   | 6.3   | 6.5   | 6.4   |
| Csnk1g2    | 47.1  | 47.4  | 46.0  | 63.6  | 45.1  | 63.0  | 56.6  | 51.3  | 48.8  | 44.9  | 47.4  | 44.1  |
| Csnk1g3    | 8.7   | 9.7   | 10.4  | 9.7   | 9.3   | 9.1   | 10.7  | 10.6  | 9.1   | 10.2  | 10.8  | 12.1  |
| Csnk2a1    | 40.7  | 39.3  | 38.2  | 40.7  | 37.1  | 42.3  | 37.0  | 35.9  | 38.3  | 43.0  | 42.9  | 41.7  |
| Csnk2a2    | 4.5   | 4.7   | 4.7   | 4.8   | 4.7   | 5.6   | 5.3   | 5.1   | 5.0   | 5.1   | 5.3   | 5.1   |
| Csnk2b     | 43.1  | 40.6  | 43.1  | 49.4  | 42.4  | 47.2  | 47.7  | 52.2  | 40.8  | 44.3  | 53.0  | 48.5  |
| Cspg4      | 0.5   | 0.3   | 0.5   | 0.1   | 0.1   | 0.2   | 0.6   | 0.5   | 0.4   | 0.4   | 0.5   | 0.4   |
| Cspg5      | 0.1   | 0.1   | 0.1   | 0.1   | 0.2   | 0.2   | 0.3   | 0.1   | 0.2   | 0.2   | 0.2   | 0.1   |
| Cspp1      | 4.6   | 4.8   | 6.1   | 4.6   | 4.1   | 4.2   | 5.9   | 5.1   | 4.5   | 4.4   | 5.7   | 5.8   |
| Csrnp1     | 3.1   | 3.3   | 2.3   | 2.6   | 2.7   | 1.7   | 3.4   | 2.3   | 3.4   | 5.6   | 3.5   | 3.2   |
| Csrnp2     | 2.5   | 2.9   | 2.7   | 3.2   | 2.8   | 3.1   | 2.8   | 2.4   | 2.5   | 2.7   | 2.7   | 2.5   |
| Csrp1      | 109.9 | 103.7 | 99.6  | 103.9 | 120.3 | 94.3  | 141.0 | 112.4 | 122.8 | 115.8 | 177.5 | 120.6 |
| Csrp2      | 22.6  | 35.8  | 57.7  | 28.1  | 54.4  | 21.4  | 49.4  | 99.2  | 76.1  | 36.9  | 39.4  | 61.1  |
| Csrp2bp    | 5.4   | 4.9   | 5.7   | 6.7   | 6.4   | 6.9   | 6.2   | 6.1   | 5.5   | 5.0   | 5.4   | 5.3   |
| Cst3       | 522.8 | 425.6 | 370.8 | 630.9 | 426.0 | 598.0 | 343.0 | 323.6 | 379.8 | 377.9 | 319.9 | 414.9 |
| Cst6       | 9.5   | 6.4   | 2.6   | 13.4  | 5.5   | 15.2  | 2.6   | 3.4   | 1.1   | 2.2   | 3.1   | 2.7   |
| Cst7       | 0.2   | 0.0   | 0.0   | 1.0   | 1.3   | 0.0   | 0.4   | 0.0   | 0.0   | 0.1   | 0.0   | 0.0   |
| Cst9       | 0.2   | 0.0   | 0.0   | 0.0   | 0.0   | 0.0   | 0.0   | 0.0   | 0.0   | 0.3   | 0.1   | 0.0   |
| Cstad      | 1.2   | 1.0   | 1.9   | 0.6   | 0.6   | 0.9   | 0.8   | 1.2   | 1.1   | 1.4   | 1.2   | 0.9   |
| Cstb       | 238.3 | 154.2 | 125.4 | 283.3 | 226.1 | 225.1 | 147.1 | 125.1 | 134.9 | 174.2 | 155.0 | 172.0 |
| Cstf1      | 9.1   | 8.5   | 7.6   | 8.4   | 9.2   | 8.3   | 9.7   | 8.4   | 8.6   | 8.2   | 9.8   | 8.0   |
| Cstf2      | 4.0   | 4.1   | 5.4   | 5.0   | 4.5   | 4.2   | 4.6   | 5.6   | 3.9   | 5.0   | 5.7   | 4.9   |
| Cstf2t     | 15.4  | 18.5  | 19.1  | 16.1  | 15.6  | 15.3  | 16.4  | 16.1  | 17.6  | 17.2  | 17.5  | 18.3  |
| Cstf3      | 3.7   | 4.4   | 4.2   | 3.3   | 4.9   | 3.5   | 3.3   | 4.3   | 4.4   | 4.8   | 5.2   | 4.8   |
| Cstl1      | 0.1   | 0.1   | 0.0   | 0.1   | 0.0   | 0.0   | 0.0   | 0.1   | 0.0   | 0.0   | 0.0   | 0.0   |
| Ctage5     | 26.1  | 22.3  | 20.5  | 28.2  | 21.5  | 23.7  | 23.5  | 20.9  | 22.2  | 23.5  | 25.7  | 23.5  |
| Ctbp1      | 34.8  | 34.0  | 29.7  | 37.4  | 35.7  | 36.6  | 37.8  | 39.1  | 40.1  | 34.6  | 36.8  | 33.2  |
| Ctbp2      | 16.1  | 17.0  | 17.3  | 15.4  | 16.5  | 14.8  | 16.5  | 17.6  | 15.9  | 15.4  | 16.0  | 16.5  |
| Ctbs       | 6.5   | 5.8   | 6.4   | 6.3   | 6.0   | 7.0   | 6.1   | 4.5   | 5.1   | 4.9   | 6.3   | 6.5   |
| Ctc1       | 5.9   | 6.4   | 6.6   | 4.9   | 5.5   | 5.7   | 5.4   | 4.0   | 5.3   | 5.1   | 4.2   | 4.1   |
| Ctcf       | 9.3   | 9.4   | 11.0  | 9.2   | 9.9   | 7.9   | 10.6  | 12.2  | 10.2  | 11.3  | 11.3  | 12.2  |
| Ctcf1      | 0.0   | 0.0   | 0.0   | 0.0   | 0.0   | 0.0   | 0.0   | 0.0   | 0.0   | 0.0   | 0.0   | 0.0   |
| Ctdnep1    | 10.5  | 9.8   | 10.2  | 10.4  | 10.8  | 10.8  | 10.7  | 11.6  | 10.3  | 10.3  | 8.9   | 7.8   |
| Ctdp1      | 7.5   | 6.3   | 5.6   | 7.1   | 7.6   | 5.4   | 9.7   | 7.2   | 6.9   | 7.1   | 8.8   | 7.1   |

Online Table 1

|          |        |        |        |        |        |        |        |        |        |        |        |        |
|----------|--------|--------|--------|--------|--------|--------|--------|--------|--------|--------|--------|--------|
| Ctdsp1   | 10.1   | 11.9   | 10.9   | 11.7   | 11.6   | 11.8   | 12.8   | 14.0   | 12.7   | 12.4   | 10.9   | 11.4   |
| Ctdsp2   | 23.7   | 33.5   | 34.3   | 20.2   | 22.0   | 25.9   | 26.9   | 36.7   | 31.6   | 24.7   | 23.8   | 24.5   |
| Ctdspl   | 15.3   | 18.9   | 18.0   | 12.9   | 10.0   | 16.2   | 14.7   | 13.3   | 14.2   | 17.2   | 16.5   | 15.3   |
| Ctdspl2  | 4.0    | 4.4    | 5.3    | 4.5    | 4.6    | 4.5    | 4.0    | 4.6    | 4.5    | 4.5    | 5.2    | 4.7    |
| Ctf1     | 0.7    | 0.7    | 0.6    | 0.2    | 0.1    | 0.3    | 0.5    | 0.6    | 0.7    | 3.2    | 1.3    | 1.0    |
| Ctgf     | 855.7  | 737.3  | 510.7  | 1119.1 | 857.9  | 1079.6 | 1308.6 | 385.7  | 816.9  | 624.5  | 808.9  | 690.5  |
| Cth      | 3.7    | 1.8    | 1.3    | 2.2    | 0.8    | 1.6    | 1.2    | 1.2    | 1.3    | 1.4    | 1.6    | 0.9    |
| Cthrc1   | 32.0   | 33.0   | 41.1   | 21.7   | 25.2   | 27.9   | 28.1   | 50.1   | 53.7   | 61.4   | 47.5   | 73.0   |
| Ctif     | 2.1    | 2.6    | 2.7    | 2.0    | 2.2    | 1.9    | 2.6    | 3.4    | 3.0    | 2.7    | 2.7    | 2.7    |
| Ctla2a   | 53.2   | 8.0    | 6.2    | 39.9   | 11.6   | 43.8   | 6.2    | 6.9    | 3.6    | 5.4    | 5.7    | 5.5    |
| Ctla2b   | 6.3    | 2.4    | 1.5    | 8.7    | 6.6    | 6.9    | 2.1    | 1.3    | 1.0    | 1.4    | 1.0    | 1.7    |
| Ctla4    | 0.1    | 0.0    | 0.0    | 0.0    | 0.0    | 0.0    | 0.0    | 0.0    | 0.0    | 0.0    | 0.0    | 0.0    |
| Ctnna1   | 102.7  | 90.9   | 89.2   | 102.5  | 91.4   | 103.5  | 103.9  | 97.5   | 95.3   | 101.6  | 117.4  | 107.4  |
| Ctnna2   | 0.6    | 0.3    | 0.5    | 0.1    | 0.3    | 0.1    | 0.2    | 0.2    | 0.1    | 0.1    | 0.6    | 0.2    |
| Ctnna3   | 0.0    | 0.0    | 0.0    | 0.2    | 0.0    | 0.0    | 0.1    | 0.0    | 0.0    | 0.0    | 0.0    | 0.0    |
| Ctnnal1  | 6.4    | 5.7    | 8.1    | 4.3    | 4.7    | 5.9    | 4.7    | 6.1    | 5.7    | 8.5    | 6.8    | 5.4    |
| Ctnnb1   | 157.7  | 142.3  | 117.0  | 187.8  | 149.6  | 181.9  | 132.1  | 126.2  | 133.4  | 161.2  | 147.2  | 136.9  |
| Ctnnbip1 | 7.7    | 6.1    | 7.1    | 8.7    | 6.9    | 6.2    | 6.6    | 6.5    | 7.3    | 8.4    | 7.7    | 7.5    |
| Ctnnb1   | 10.0   | 9.1    | 8.4    | 10.2   | 8.8    | 10.4   | 9.0    | 9.5    | 8.2    | 9.0    | 8.9    | 9.8    |
| Ctnnd1   | 46.6   | 50.5   | 36.7   | 62.6   | 60.0   | 72.2   | 58.3   | 39.3   | 57.1   | 57.3   | 60.5   | 56.7   |
| Ctnnd2   | 0.5    | 0.2    | 0.2    | 0.3    | 0.1    | 0.3    | 0.3    | 0.1    | 0.1    | 0.2    | 0.2    | 0.1    |
| Ctns     | 5.3    | 5.2    | 4.8    | 5.8    | 4.4    | 6.5    | 4.1    | 5.1    | 4.9    | 4.5    | 4.7    | 4.5    |
| Ctps     | 136.5  | 112.8  | 108.2  | 109.6  | 99.7   | 83.4   | 105.0  | 101.8  | 102.7  | 95.5   | 102.5  | 102.8  |
| Ctps2    | 12.0   | 12.0   | 11.6   | 10.8   | 10.2   | 10.1   | 10.6   | 10.8   | 10.3   | 9.9    | 10.6   | 11.1   |
| Ctr9     | 16.5   | 17.3   | 18.0   | 17.0   | 15.8   | 17.4   | 17.4   | 17.4   | 14.2   | 18.4   | 19.9   | 19.9   |
| Ctrb1    | 0.0    | 0.0    | 0.0    | 0.0    | 0.0    | 0.1    | 0.1    | 0.0    | 0.0    | 0.0    | 0.0    | 0.0    |
| Ctrl     | 0.0    | 0.0    | 0.0    | 0.0    | 0.1    | 0.1    | 0.1    | 0.0    | 0.0    | 0.0    | 0.2    | 0.1    |
| Ctsa     | 80.8   | 54.8   | 53.6   | 106.6  | 90.3   | 83.4   | 53.7   | 63.5   | 52.5   | 65.6   | 58.9   | 70.3   |
| Ctsb     | 134.0  | 97.0   | 93.3   | 214.9  | 219.1  | 114.4  | 77.3   | 84.2   | 81.2   | 109.6  | 85.9   | 99.6   |
| Ctsc     | 1.5    | 0.3    | 0.4    | 7.8    | 17.6   | 0.2    | 3.3    | 1.6    | 1.3    | 2.4    | 1.4    | 2.2    |
| Ctsd     | 1438.7 | 1236.2 | 1192.5 | 1748.3 | 1698.3 | 1649.1 | 1054.7 | 1271.2 | 1155.5 | 1110.3 | 1058.4 | 1219.8 |
| Ctsf     | 34.3   | 33.5   | 29.1   | 31.9   | 27.0   | 36.4   | 22.4   | 22.2   | 22.7   | 31.4   | 26.2   | 28.5   |
| Ctsh     | 49.6   | 38.1   | 45.2   | 72.4   | 74.7   | 64.4   | 55.8   | 55.0   | 48.1   | 49.9   | 58.9   | 66.4   |
| Ctsk     | 33.2   | 17.4   | 20.0   | 31.9   | 23.8   | 27.0   | 21.5   | 33.7   | 24.4   | 23.5   | 22.1   | 28.9   |
| Ctsl     | 536.0  | 372.4  | 379.0  | 566.6  | 368.6  | 562.5  | 291.7  | 333.9  | 301.4  | 355.4  | 374.6  | 406.0  |
| Ctsll3   | 0.0    | 0.0    | 0.0    | 0.0    | 0.0    | 0.0    | 0.0    | 0.0    | 0.0    | 0.0    | 0.0    | 0.1    |
| Ctso     | 6.4    | 6.8    | 8.8    | 6.9    | 8.9    | 7.0    | 7.4    | 7.6    | 8.4    | 7.6    | 7.1    | 8.1    |
| Ctss     | 8.6    | 0.5    | 1.1    | 87.8   | 113.7  | 0.2    | 7.5    | 5.2    | 1.3    | 6.1    | 3.7    | 5.1    |
| Ctsw     | 1.2    | 0.4    | 0.3    | 2.0    | 1.2    | 0.8    | 0.9    | 0.1    | 0.5    | 0.4    | 0.5    | 0.4    |
| Ctsz     | 291.4  | 195.4  | 188.4  | 430.0  | 306.6  | 323.1  | 189.7  | 147.1  | 151.8  | 184.3  | 182.0  | 213.3  |
| Ctn      | 87.7   | 85.2   | 91.8   | 90.8   | 77.5   | 84.4   | 98.6   | 101.9  | 91.3   | 87.6   | 100.7  | 107.0  |
| Ctnbp2   | 0.0    | 0.0    | 0.0    | 0.0    | 0.0    | 0.0    | 0.0    | 0.1    | 0.0    | 0.1    | 0.1    | 0.1    |
| Ctnbp2nl | 19.1   | 18.1   | 14.2   | 21.5   | 19.1   | 16.4   | 17.7   | 13.8   | 13.7   | 16.7   | 18.0   | 15.0   |
| Ctu1     | 2.6    | 2.5    | 2.0    | 2.1    | 2.5    | 1.8    | 2.4    | 1.9    | 2.9    | 2.6    | 2.7    | 2.3    |
| Ctu2     | 3.2    | 3.5    | 2.9    | 3.6    | 3.1    | 3.7    | 3.7    | 3.7    | 3.8    | 2.7    | 3.0    | 2.8    |
| Ctxn1    | 0.7    | 0.7    | 0.6    | 1.5    | 1.4    | 1.1    | 1.0    | 0.8    | 1.5    | 3.6    | 2.3    | 1.4    |
| Cubn     | 0.7    | 0.4    | 0.5    | 0.4    | 0.5    | 0.5    | 0.4    | 0.4    | 0.3    | 0.2    | 0.3    | 0.2    |
| Cuedc1   | 7.1    | 7.5    | 6.8    | 8.5    | 7.5    | 8.6    | 8.4    | 6.9    | 7.6    | 6.7    | 7.3    | 7.5    |
| Cuedc2   | 13.1   | 10.7   | 12.0   | 15.5   | 12.1   | 14.0   | 10.0   | 12.4   | 9.6    | 12.7   | 12.2   | 12.8   |
| Cul1     | 32.8   | 32.2   | 31.0   | 34.4   | 36.8   | 31.5   | 33.4   | 34.0   | 35.0   | 38.1   | 38.0   | 38.9   |
| Cul2     | 10.9   | 11.3   | 10.4   | 10.0   | 10.1   | 12.2   | 9.6    | 10.0   | 10.4   | 9.8    | 11.3   | 10.7   |
| Cul3     | 33.8   | 38.9   | 40.2   | 36.2   | 35.6   | 33.7   | 38.0   | 38.2   | 38.7   | 36.3   | 45.4   | 42.8   |
| Cul4a    | 49.0   | 41.2   | 33.8   | 46.5   | 38.4   | 46.1   | 40.6   | 33.3   | 37.3   | 41.6   | 43.1   | 42.5   |
| Cul4b    | 21.7   | 21.9   | 20.2   | 21.4   | 20.6   | 20.5   | 19.9   | 17.5   | 20.0   | 21.5   | 24.1   | 23.0   |
| Cul5     | 12.7   | 13.3   | 12.5   | 12.6   | 10.7   | 14.3   | 12.1   | 11.6   | 12.1   | 12.2   | 14.7   | 13.2   |
| Cul7     | 15.5   | 15.5   | 15.9   | 13.1   | 11.8   | 17.0   | 14.7   | 16.5   | 14.9   | 16.4   | 14.0   | 14.8   |
| Cul9     | 4.2    | 4.9    | 4.7    | 4.0    | 3.9    | 5.5    | 3.5    | 4.1    | 3.9    | 3.1    | 2.7    | 3.3    |

Online Table 1

|          |       |       |       |       |       |       |       |       |       |       |       |       |
|----------|-------|-------|-------|-------|-------|-------|-------|-------|-------|-------|-------|-------|
| Cuta     | 34.2  | 33.4  | 35.5  | 38.3  | 31.3  | 36.3  | 33.5  | 38.4  | 35.4  | 33.4  | 30.4  | 29.0  |
| Cutc     | 1.7   | 1.3   | 1.4   | 1.7   | 1.5   | 0.8   | 0.8   | 1.0   | 1.4   | 1.3   | 1.5   | 1.3   |
| Cux1     | 31.6  | 29.7  | 27.6  | 37.2  | 37.9  | 32.8  | 42.6  | 35.3  | 38.3  | 35.7  | 43.3  | 43.0  |
| Cux2     | 0.0   | 0.0   | 0.0   | 0.0   | 0.0   | 0.0   | 0.0   | 0.1   | 0.0   | 0.0   | 0.0   | 0.0   |
| Cwc15    | 70.5  | 60.8  | 71.0  | 95.2  | 60.9  | 78.4  | 75.6  | 67.1  | 54.8  | 59.6  | 80.2  | 76.0  |
| Cwc22    | 9.3   | 8.8   | 10.5  | 9.7   | 8.9   | 8.8   | 9.6   | 9.4   | 8.0   | 7.9   | 10.1  | 10.5  |
| Cwc25    | 4.9   | 4.9   | 6.4   | 5.9   | 5.6   | 5.0   | 5.6   | 6.4   | 5.4   | 5.2   | 6.0   | 6.1   |
| Cwc27    | 10.4  | 11.2  | 12.3  | 14.3  | 9.5   | 16.5  | 10.4  | 9.8   | 8.4   | 8.8   | 11.0  | 11.8  |
| Cwf1911  | 1.9   | 2.3   | 2.0   | 2.3   | 2.1   | 1.9   | 1.9   | 2.0   | 1.7   | 2.1   | 2.1   | 1.9   |
| Cwf1912  | 6.4   | 6.8   | 7.1   | 7.3   | 5.9   | 7.3   | 6.1   | 5.6   | 5.3   | 5.7   | 6.8   | 7.6   |
| Cx3cl1   | 9.1   | 8.8   | 9.0   | 18.7  | 24.4  | 16.9  | 19.3  | 7.5   | 11.1  | 18.1  | 11.4  | 11.8  |
| Cx3cr1   | 1.0   | 0.2   | 0.2   | 5.4   | 20.3  | 0.2   | 2.8   | 0.3   | 0.6   | 1.2   | 0.4   | 1.2   |
| Cxadr    | 2.1   | 1.2   | 1.3   | 0.6   | 0.7   | 1.0   | 1.0   | 2.1   | 3.3   | 24.1  | 9.6   | 6.6   |
| Cxcl1    | 17.7  | 15.9  | 59.6  | 26.1  | 30.6  | 8.5   | 21.0  | 27.4  | 15.3  | 14.9  | 7.3   | 15.5  |
| Cxcl10   | 2.0   | 0.2   | 0.6   | 6.1   | 1.0   | 1.5   | 0.4   | 0.1   | 0.2   | 0.6   | 0.6   | 1.1   |
| Cxcl12   | 26.7  | 30.9  | 82.8  | 26.3  | 54.4  | 50.9  | 67.1  | 104.5 | 129.3 | 145.9 | 106.1 | 161.8 |
| Cxcl14   | 1.6   | 0.9   | 2.1   | 2.0   | 2.5   | 0.7   | 4.7   | 2.5   | 3.1   | 5.8   | 4.8   | 6.6   |
| Cxcl16   | 14.5  | 6.7   | 11.3  | 33.6  | 47.5  | 16.3  | 18.5  | 9.3   | 9.8   | 12.4  | 7.2   | 13.1  |
| Cxcl2    | 0.5   | 0.2   | 0.2   | 1.9   | 4.2   | 0.1   | 1.3   | 0.1   | 0.3   | 0.4   | 0.1   | 0.2   |
| Cxcl3    | 0.3   | 0.3   | 0.1   | 0.6   | 0.5   | 0.1   | 0.3   | 0.2   | 0.0   | 0.0   | 0.1   | 0.2   |
| Cxcl5    | 9.2   | 12.1  | 63.7  | 8.8   | 40.3  | 2.7   | 24.6  | 28.1  | 17.1  | 2.8   | 3.0   | 9.4   |
| Cxcl9    | 0.0   | 0.0   | 0.0   | 0.0   | 0.0   | 0.0   | 0.0   | 0.0   | 0.0   | 0.0   | 0.0   | 0.0   |
| Cxcr1    | 0.0   | 0.0   | 0.1   | 0.0   | 0.0   | 0.0   | 0.0   | 0.0   | 0.0   | 0.0   | 0.0   | 0.0   |
| Cxcr2    | 0.0   | 0.1   | 0.1   | 0.0   | 0.1   | 0.1   | 0.0   | 0.0   | 0.0   | 0.1   | 0.1   | 0.0   |
| Cxcr3    | 0.0   | 0.0   | 0.0   | 0.6   | 2.2   | 0.0   | 0.3   | 0.1   | 0.1   | 0.1   | 0.1   | 0.0   |
| Cxcr4    | 1.5   | 0.7   | 1.2   | 2.5   | 2.7   | 0.2   | 1.5   | 2.2   | 1.2   | 0.2   | 0.5   | 0.6   |
| Cxcr5    | 0.0   | 0.1   | 0.0   | 0.1   | 0.1   | 0.0   | 0.1   | 0.1   | 0.0   | 0.2   | 0.1   | 0.0   |
| Cxcr6    | 0.1   | 0.0   | 0.1   | 0.2   | 0.2   | 0.2   | 0.1   | 0.2   | 0.0   | 0.2   | 0.1   | 0.2   |
| Cxcr7    | 11.4  | 17.1  | 13.6  | 6.8   | 10.7  | 9.7   | 17.4  | 14.1  | 15.3  | 20.3  | 21.7  | 15.9  |
| Cxx1a    | 7.0   | 6.7   | 6.3   | 9.0   | 6.7   | 8.1   | 8.1   | 7.4   | 7.1   | 7.1   | 7.8   | 6.4   |
| Cxx1b    | 10.4  | 9.6   | 8.9   | 12.6  | 11.3  | 12.1  | 10.6  | 11.2  | 11.5  | 10.7  | 11.6  | 10.0  |
| Cxx1c    | 12.8  | 14.6  | 14.5  | 16.3  | 15.3  | 18.4  | 18.2  | 13.9  | 16.4  | 18.5  | 14.5  | 14.0  |
| Cxxc1    | 5.2   | 5.3   | 6.6   | 6.2   | 5.5   | 5.2   | 6.6   | 7.2   | 6.1   | 6.4   | 6.2   | 7.3   |
| Cxxc4    | 0.0   | 0.0   | 0.0   | 0.0   | 0.0   | 0.0   | 0.0   | 0.0   | 0.0   | 0.0   | 0.0   | 0.0   |
| Cxxc5    | 5.7   | 7.1   | 7.0   | 5.3   | 5.1   | 6.7   | 7.3   | 9.3   | 8.7   | 7.9   | 9.3   | 7.9   |
| Cyb5     | 607.5 | 645.5 | 579.7 | 745.2 | 580.8 | 657.0 | 459.1 | 429.8 | 350.3 | 479.0 | 481.2 | 454.9 |
| Cyb561   | 0.5   | 0.3   | 0.4   | 0.2   | 0.3   | 0.6   | 0.2   | 0.6   | 0.2   | 0.3   | 0.3   | 0.3   |
| Cyb561d1 | 0.9   | 0.8   | 0.9   | 0.9   | 1.0   | 0.7   | 0.8   | 0.8   | 1.1   | 0.9   | 0.7   | 0.9   |
| Cyb561d2 | 7.7   | 6.9   | 5.7   | 6.9   | 6.9   | 6.7   | 7.1   | 6.5   | 7.9   | 8.4   | 6.3   | 7.0   |
| Cyb5b    | 42.3  | 42.3  | 41.8  | 41.6  | 37.0  | 38.1  | 47.4  | 48.7  | 41.4  | 33.8  | 46.5  | 36.7  |
| Cyb5d1   | 31.7  | 25.4  | 21.6  | 31.9  | 22.0  | 26.9  | 22.4  | 16.7  | 17.9  | 23.3  | 22.1  | 25.0  |
| Cyb5d2   | 8.3   | 7.8   | 5.4   | 9.4   | 6.6   | 8.2   | 6.2   | 5.3   | 5.9   | 6.3   | 6.5   | 6.6   |
| Cyb5r1   | 48.1  | 31.5  | 22.7  | 63.4  | 28.0  | 63.3  | 36.1  | 46.2  | 42.0  | 31.8  | 42.6  | 30.0  |
| Cyb5r2   | 1.0   | 0.4   | 0.4   | 0.9   | 0.3   | 0.9   | 0.2   | 0.4   | 0.4   | 0.1   | 0.4   | 0.4   |
| Cyb5r3   | 255.1 | 211.3 | 203.9 | 246.0 | 191.1 | 238.7 | 239.7 | 253.3 | 209.3 | 257.9 | 298.0 | 259.2 |
| Cyb5r4   | 18.6  | 19.0  | 19.1  | 20.2  | 20.9  | 16.9  | 16.8  | 18.7  | 18.3  | 20.2  | 21.3  | 20.7  |
| Cyb5rl   | 3.1   | 2.2   | 1.3   | 3.1   | 2.3   | 2.9   | 1.9   | 1.6   | 1.9   | 2.7   | 2.4   | 2.1   |
| Cyba     | 107.0 | 77.0  | 63.8  | 142.2 | 158.4 | 125.1 | 83.9  | 60.6  | 70.4  | 100.4 | 67.8  | 78.2  |
| Cybas3   | 8.6   | 8.0   | 7.4   | 8.3   | 9.6   | 9.8   | 6.8   | 6.5   | 8.6   | 9.4   | 8.2   | 6.8   |
| Cybb     | 2.0   | 0.1   | 0.1   | 17.7  | 23.9  | 0.0   | 2.2   | 0.4   | 0.4   | 1.0   | 0.3   | 0.9   |
| Cybrd1   | 0.0   | 0.0   | 0.0   | 0.0   | 0.0   | 0.0   | 0.0   | 0.0   | 0.0   | 0.2   | 0.1   | 0.0   |
| Cyc1     | 26.8  | 28.4  | 21.7  | 24.9  | 26.7  | 26.1  | 24.6  | 26.3  | 26.4  | 27.7  | 23.9  | 21.6  |
| Cycs     | 25.2  | 19.4  | 20.6  | 30.7  | 24.3  | 23.9  | 23.3  | 17.9  | 20.8  | 23.9  | 28.3  | 26.9  |
| Cyct     | 0.2   | 0.2   | 0.2   | 0.0   | 0.3   | 0.1   | 0.5   | 0.2   | 0.0   | 0.0   | 0.0   | 0.0   |
| Cyfp1    | 29.9  | 25.6  | 23.3  | 30.4  | 34.9  | 24.3  | 26.1  | 28.2  | 24.4  | 26.7  | 29.9  | 25.3  |
| Cyfp2    | 0.8   | 0.5   | 0.3   | 2.1   | 3.4   | 0.6   | 0.7   | 0.1   | 0.2   | 0.4   | 0.3   | 0.4   |
| Cygb     | 19.5  | 37.1  | 56.9  | 24.0  | 33.3  | 33.8  | 28.0  | 61.7  | 43.0  | 20.7  | 19.4  | 40.8  |

Online Table 1

|               |       |       |       |       |       |       |       |       |       |       |       |       |
|---------------|-------|-------|-------|-------|-------|-------|-------|-------|-------|-------|-------|-------|
| Cyhr1         | 34.1  | 33.7  | 29.6  | 38.6  | 31.3  | 39.8  | 31.5  | 30.6  | 33.5  | 34.3  | 30.5  | 29.0  |
| Cyld          | 14.3  | 11.6  | 9.7   | 13.3  | 11.0  | 12.5  | 8.6   | 7.7   | 7.9   | 12.5  | 11.7  | 10.8  |
| Cyp11b1       | 0.1   | 0.0   | 0.0   | 0.0   | 0.0   | 0.1   | 0.0   | 0.0   | 0.0   | 0.0   | 0.1   | 0.0   |
| Cyp17a1       | 0.0   | 0.0   | 0.0   | 0.0   | 0.0   | 0.0   | 0.0   | 0.0   | 0.0   | 0.0   | 0.0   | 0.0   |
| Cyp1a1        | 0.2   | 0.1   | 0.0   | 0.4   | 0.0   | 0.3   | 0.0   | 0.0   | 0.0   | 0.0   | 0.0   | 0.0   |
| Cyp1b1        | 45.0  | 57.8  | 94.7  | 55.5  | 96.9  | 51.1  | 92.4  | 139.3 | 112.5 | 93.6  | 91.0  | 108.6 |
| Cyp20a1       | 32.1  | 27.9  | 22.0  | 29.4  | 27.6  | 31.0  | 34.5  | 32.6  | 33.7  | 25.8  | 34.2  | 31.1  |
| Cyp26b1       | 0.6   | 0.4   | 0.2   | 0.8   | 0.2   | 1.1   | 0.3   | 0.0   | 0.1   | 0.3   | 0.5   | 0.2   |
| Cyp26c1       | 0.0   | 0.0   | 0.0   | 0.1   | 0.1   | 0.1   | 0.0   | 0.0   | 0.0   | 0.0   | 0.0   | 0.0   |
| Cyp27a1       | 2.5   | 2.9   | 3.4   | 3.9   | 1.8   | 4.2   | 0.9   | 2.1   | 1.7   | 1.0   | 1.3   | 1.6   |
| Cyp27b1       | 0.1   | 0.0   | 0.0   | 0.0   | 0.0   | 0.0   | 0.0   | 0.0   | 0.0   | 0.0   | 0.0   | 0.0   |
| Cyp2ab1       | 0.0   | 0.0   | 0.0   | 0.0   | 0.0   | 0.0   | 0.0   | 0.0   | 0.0   | 0.0   | 0.0   | 0.0   |
| Cyp2b10       | 0.0   | 0.0   | 0.0   | 0.0   | 0.0   | 0.0   | 0.0   | 0.0   | 0.0   | 0.0   | 0.0   | 0.0   |
| Cyp2c44       | 0.0   | 0.0   | 0.0   | 0.0   | 0.0   | 0.0   | 0.0   | 0.0   | 0.0   | 0.1   | 0.0   | 0.0   |
| Cyp2c55       | 0.0   | 0.0   | 0.1   | 0.0   | 0.0   | 0.0   | 0.0   | 0.0   | 0.1   | 0.0   | 0.0   | 0.0   |
| Cyp2d22       | 2.4   | 3.5   | 3.2   | 1.3   | 2.3   | 2.2   | 3.4   | 4.4   | 4.9   | 2.6   | 3.2   | 2.8   |
| Cyp2d26       | 0.0   | 0.1   | 0.0   | 0.0   | 0.1   | 0.0   | 0.0   | 0.0   | 0.1   | 0.0   | 0.1   | 0.0   |
| Cyp2d9        | 0.0   | 0.1   | 0.0   | 0.1   | 0.0   | 0.0   | 0.0   | 0.0   | 0.0   | 0.0   | 0.0   | 0.0   |
| Cyp2j13       | 0.0   | 0.0   | 0.0   | 0.0   | 0.0   | 0.0   | 0.0   | 0.0   | 0.0   | 0.0   | 0.0   | 0.0   |
| Cyp2j6        | 8.0   | 6.8   | 7.6   | 8.4   | 7.1   | 10.3  | 8.1   | 7.2   | 7.0   | 7.5   | 7.9   | 8.6   |
| Cyp2j9        | 2.4   | 2.1   | 2.9   | 3.0   | 2.4   | 4.0   | 2.9   | 1.9   | 1.7   | 1.5   | 2.0   | 2.3   |
| Cyp2r1        | 1.1   | 1.9   | 2.0   | 0.8   | 1.8   | 1.0   | 1.7   | 1.5   | 2.4   | 1.6   | 1.6   | 1.3   |
| Cyp2s1        | 0.8   | 0.2   | 0.2   | 0.1   | 0.0   | 0.2   | 0.1   | 0.4   | 0.3   | 7.2   | 2.5   | 1.3   |
| Cyp2t4        | 0.0   | 0.1   | 0.0   | 0.0   | 0.0   | 0.0   | 0.0   | 0.0   | 0.0   | 0.0   | 0.0   | 0.0   |
| Cyp2u1        | 7.6   | 6.3   | 5.2   | 8.2   | 7.1   | 9.3   | 8.1   | 5.0   | 5.6   | 4.6   | 5.2   | 5.3   |
| Cyp39a1       | 1.1   | 1.8   | 2.6   | 0.6   | 0.9   | 0.7   | 1.1   | 2.1   | 1.7   | 1.2   | 1.4   | 1.3   |
| Cyp3a13       | 0.3   | 0.0   | 0.1   | 0.1   | 0.1   | 0.0   | 0.0   | 0.0   | 0.0   | 0.0   | 0.1   | 0.0   |
| Cyp46a1       | 0.3   | 0.1   | 0.4   | 0.1   | 0.2   | 0.3   | 0.2   | 0.2   | 0.2   | 0.2   | 0.1   | 0.1   |
| Cyp4a12b      | 0.2   | 0.0   | 0.0   | 0.2   | 0.0   | 0.1   | 0.1   | 0.0   | 0.0   | 0.0   | 0.0   | 0.0   |
| Cyp4b1        | 0.3   | 0.4   | 0.3   | 0.1   | 0.3   | 0.1   | 0.3   | 0.8   | 0.4   | 0.1   | 0.1   | 0.0   |
| Cyp4f13       | 6.0   | 6.0   | 5.5   | 6.0   | 5.1   | 7.2   | 5.1   | 4.6   | 5.4   | 6.1   | 5.4   | 5.9   |
| Cyp4f14       | 0.3   | 0.3   | 0.4   | 0.2   | 0.1   | 0.4   | 0.1   | 0.2   | 0.1   | 0.1   | 0.2   | 0.3   |
| Cyp4f15       | 0.0   | 0.0   | 0.0   | 0.0   | 0.0   | 0.0   | 0.0   | 0.0   | 0.0   | 0.0   | 0.0   | 0.0   |
| Cyp4f16       | 4.6   | 4.1   | 3.3   | 5.3   | 6.1   | 5.1   | 4.7   | 4.7   | 4.5   | 4.3   | 4.7   | 4.0   |
| Cyp4f17       | 7.5   | 6.5   | 5.7   | 6.7   | 5.9   | 6.6   | 6.2   | 5.2   | 5.7   | 7.4   | 6.3   | 5.9   |
| Cyp4f18       | 0.2   | 0.0   | 0.0   | 0.5   | 1.3   | 0.0   | 0.1   | 0.0   | 0.0   | 0.1   | 0.0   | 0.0   |
| Cyp4f41-ps    | 0.3   | 0.2   | 0.2   | 0.5   | 0.2   | 0.2   | 0.2   | 0.4   | 0.2   | 0.2   | 0.2   | 0.2   |
| Cyp4v3        | 9.5   | 8.4   | 11.8  | 10.8  | 11.3  | 12.1  | 8.5   | 9.2   | 7.4   | 5.5   | 5.8   | 10.4  |
| Cyp51         | 22.6  | 28.8  | 29.1  | 9.0   | 18.6  | 12.5  | 50.9  | 64.4  | 46.8  | 17.4  | 51.5  | 22.9  |
| Cyp7b1        | 0.4   | 0.5   | 1.8   | 0.0   | 0.6   | 0.3   | 0.5   | 1.5   | 0.7   | 1.0   | 0.5   | 1.3   |
| Cyr61         | 294.1 | 313.3 | 334.2 | 228.7 | 254.3 | 200.4 | 379.8 | 263.8 | 379.2 | 346.2 | 312.9 | 323.6 |
| Cys1          | 3.1   | 3.3   | 3.0   | 2.7   | 2.4   | 3.2   | 2.1   | 2.7   | 2.9   | 3.2   | 2.8   | 3.2   |
| Cysltr1       | 0.1   | 0.0   | 0.0   | 0.3   | 1.0   | 0.1   | 0.1   | 0.0   | 0.0   | 0.1   | 0.0   | 0.1   |
| Cystm1        | 17.1  | 7.9   | 5.5   | 23.3  | 6.9   | 22.2  | 5.4   | 5.1   | 5.6   | 7.1   | 9.6   | 5.5   |
| Cyth1         | 2.7   | 3.1   | 3.0   | 4.6   | 5.9   | 2.5   | 2.8   | 2.6   | 2.6   | 2.6   | 2.4   | 2.9   |
| Cyth2         | 9.2   | 9.3   | 9.8   | 9.3   | 9.5   | 8.7   | 12.1  | 11.0  | 12.3  | 12.7  | 12.0  | 11.6  |
| Cyth3         | 60.6  | 92.5  | 98.1  | 60.0  | 61.7  | 67.3  | 77.8  | 73.6  | 79.9  | 45.7  | 62.1  | 69.4  |
| Cyth4         | 1.6   | 0.0   | 0.2   | 12.7  | 20.9  | 0.0   | 2.4   | 0.3   | 0.5   | 1.1   | 0.3   | 1.0   |
| Cytip         | 0.0   | 0.0   | 0.0   | 0.2   | 0.4   | 0.0   | 0.0   | 0.0   | 0.0   | 0.0   | 0.0   | 0.0   |
| D030018L15Rik | 0.0   | 0.0   | 0.0   | 0.0   | 0.0   | 0.0   | 0.0   | 0.0   | 0.0   | 0.0   | 0.0   | 0.0   |
| D030025P21Rik | 0.6   | 0.5   | 0.7   | 0.4   | 1.6   | 0.9   | 3.9   | 1.5   | 2.9   | 6.3   | 2.8   | 2.5   |
| D030028A08Rik | 0.7   | 0.8   | 0.7   | 0.5   | 0.8   | 0.3   | 0.8   | 0.8   | 0.6   | 1.0   | 0.6   | 0.8   |
| D030040B21Rik | 0.0   | 0.0   | 0.0   | 0.0   | 0.0   | 0.0   | 0.0   | 0.0   | 0.0   | 0.0   | 0.0   | 0.0   |
| D030047H15Rik | 0.1   | 0.0   | 0.1   | 0.0   | 0.1   | 0.1   | 0.1   | 0.1   | 0.0   | 0.0   | 0.0   | 0.1   |
| D030056L22Rik | 8.8   | 9.7   | 8.9   | 5.3   | 9.9   | 7.9   | 6.7   | 6.2   | 9.3   | 11.6  | 9.1   | 7.7   |
| D10Bwg1379e   | 0.2   | 0.1   | 0.1   | 0.3   | 0.3   | 0.2   | 0.1   | 0.1   | 0.0   | 0.1   | 0.1   | 0.1   |
| D10Jhu81e     | 22.5  | 20.7  | 21.4  | 19.4  | 18.1  | 20.6  | 17.8  | 22.8  | 18.9  | 20.9  | 17.6  | 22.4  |

Online Table 1

|               |      |      |      |      |      |      |      |      |      |      |      |      |
|---------------|------|------|------|------|------|------|------|------|------|------|------|------|
| D10Wsu102e    | 6.4  | 5.6  | 5.0  | 5.9  | 6.4  | 5.6  | 7.0  | 6.2  | 5.5  | 6.6  | 6.3  | 6.2  |
| D10Wsu52e     | 67.1 | 56.0 | 51.1 | 70.5 | 57.3 | 64.1 | 56.7 | 57.6 | 53.6 | 63.2 | 61.3 | 59.7 |
| D11Wsu47e     | 3.6  | 3.6  | 3.5  | 3.9  | 3.7  | 2.8  | 3.5  | 4.5  | 4.7  | 4.1  | 3.9  | 3.7  |
| D130009I18Rik | 0.0  | 0.0  | 0.0  | 0.0  | 0.0  | 0.0  | 0.0  | 0.0  | 0.0  | 0.0  | 0.0  | 0.0  |
| D130017N08Rik | 0.4  | 0.6  | 0.5  | 0.3  | 0.5  | 0.8  | 0.3  | 0.6  | 0.3  | 0.5  | 0.3  | 0.6  |
| D130020L05Rik | 2.4  | 2.4  | 2.4  | 2.2  | 2.4  | 2.2  | 3.2  | 2.9  | 3.2  | 2.6  | 1.9  | 2.8  |
| D130040H23Rik | 0.5  | 1.1  | 1.5  | 0.6  | 1.0  | 1.1  | 0.6  | 1.0  | 0.8  | 0.8  | 0.8  | 0.9  |
| D130043K22Rik | 0.0  | 0.0  | 0.0  | 0.0  | 0.0  | 0.0  | 0.0  | 0.0  | 0.0  | 0.0  | 0.1  | 0.0  |
| D14Abb1e      | 4.6  | 5.7  | 6.8  | 4.7  | 5.7  | 5.0  | 4.7  | 5.8  | 5.4  | 5.9  | 6.6  | 6.8  |
| D15Ert621e    | 33.4 | 34.1 | 29.6 | 33.2 | 35.5 | 34.0 | 33.6 | 30.6 | 33.4 | 35.4 | 36.5 | 38.4 |
| D16Ert647e    | 1.7  | 1.4  | 1.8  | 1.9  | 1.7  | 1.8  | 1.2  | 1.6  | 1.3  | 2.5  | 2.1  | 1.6  |
| D17Ert648e    | 0.6  | 0.5  | 0.4  | 0.4  | 0.7  | 0.4  | 0.7  | 0.5  | 0.3  | 0.5  | 0.2  | 0.3  |
| D17H6S53E     | 6.0  | 6.4  | 6.5  | 7.3  | 6.6  | 7.6  | 7.1  | 6.9  | 7.6  | 6.4  | 6.0  | 8.0  |
| D17Wsu104e    | 51.3 | 46.9 | 43.5 | 44.2 | 52.0 | 48.8 | 51.1 | 50.6 | 55.3 | 53.4 | 45.4 | 47.6 |
| D17Wsu92e     | 29.3 | 26.7 | 22.5 | 36.3 | 26.2 | 34.1 | 24.2 | 19.2 | 20.5 | 21.2 | 21.7 | 20.5 |
| D19Bwg1357e   | 19.7 | 15.0 | 14.5 | 23.6 | 16.8 | 18.7 | 18.3 | 17.1 | 13.7 | 14.8 | 18.9 | 17.4 |
| D19Ert737e    | 8.5  | 6.2  | 6.9  | 9.9  | 5.2  | 8.8  | 7.4  | 5.8  | 6.1  | 6.2  | 8.1  | 8.2  |
| D1Ert622e     | 2.5  | 1.8  | 1.6  | 4.7  | 5.4  | 2.4  | 2.3  | 2.1  | 1.7  | 2.8  | 2.5  | 2.5  |
| D1Pas1        | 0.0  | 0.0  | 0.0  | 0.0  | 0.0  | 0.0  | 0.0  | 0.0  | 0.0  | 0.0  | 0.0  | 0.0  |
| D230025D16Rik | 6.4  | 6.9  | 7.7  | 5.8  | 6.6  | 6.2  | 6.5  | 7.0  | 6.6  | 6.7  | 6.0  | 6.7  |
| D2hgdh        | 4.2  | 4.1  | 4.5  | 4.5  | 3.9  | 5.0  | 3.8  | 4.8  | 4.0  | 3.4  | 3.0  | 3.6  |
| D2Wsu81e      | 9.0  | 8.8  | 10.6 | 10.6 | 8.5  | 10.3 | 10.2 | 9.2  | 9.0  | 10.1 | 10.1 | 8.9  |
| D330022K07Rik | 0.3  | 0.6  | 0.6  | 0.3  | 0.5  | 0.6  | 0.2  | 0.3  | 0.2  | 0.1  | 0.0  | 0.2  |
| D330023K18Rik | 3.3  | 3.1  | 2.9  | 5.2  | 3.8  | 3.7  | 3.2  | 2.4  | 3.3  | 4.6  | 2.7  | 3.2  |
| D330041H03Rik | 3.4  | 2.7  | 2.6  | 2.2  | 2.3  | 2.9  | 2.4  | 2.6  | 2.1  | 2.8  | 2.7  | 2.4  |
| D330045A20Rik | 0.2  | 0.0  | 0.1  | 0.5  | 1.5  | 0.1  | 0.2  | 0.0  | 0.1  | 0.2  | 0.1  | 0.1  |
| D330050G23Rik | 0.4  | 0.4  | 0.2  | 0.2  | 0.6  | 0.4  | 0.2  | 0.3  | 0.1  | 0.3  | 0.2  | 0.2  |
| D330050I16Rik | 3.2  | 2.6  | 3.6  | 2.8  | 2.8  | 2.3  | 3.6  | 2.7  | 3.3  | 2.8  | 2.6  | 3.4  |
| D3Bwg0562e    | 0.0  | 0.0  | 0.0  | 0.0  | 0.0  | 0.0  | 0.0  | 0.0  | 0.0  | 0.0  | 0.0  | 0.0  |
| D3Ert254e     | 3.1  | 3.0  | 3.7  | 3.1  | 3.3  | 3.6  | 3.4  | 3.5  | 3.2  | 3.6  | 4.2  | 3.9  |
| D3Ert751e     | 3.8  | 3.5  | 4.8  | 5.4  | 3.4  | 5.8  | 3.9  | 3.0  | 3.3  | 4.5  | 4.8  | 5.4  |
| D430020J02Rik | 0.5  | 0.8  | 1.0  | 0.2  | 0.8  | 0.4  | 1.5  | 0.7  | 0.9  | 0.7  | 0.9  | 0.6  |
| D430041D05Rik | 0.0  | 0.0  | 0.0  | 0.0  | 0.0  | 0.0  | 0.0  | 0.0  | 0.0  | 0.0  | 0.0  | 0.0  |
| D430042O09Rik | 7.3  | 7.9  | 6.9  | 7.5  | 7.1  | 8.2  | 6.1  | 5.6  | 5.3  | 5.7  | 5.7  | 6.0  |
| D4Ert617e     | 0.0  | 0.0  | 0.0  | 0.0  | 0.0  | 0.0  | 0.0  | 0.0  | 0.0  | 0.0  | 0.0  | 0.1  |
| D4Wsu53e      | 60.8 | 61.5 | 64.3 | 46.5 | 61.6 | 48.4 | 53.5 | 60.5 | 80.3 | 58.7 | 54.9 | 63.7 |
| D5Ert579e     | 13.3 | 10.3 | 9.2  | 13.4 | 10.8 | 14.2 | 11.4 | 10.7 | 10.7 | 10.9 | 12.4 | 11.0 |
| D5Ert605e     | 3.2  | 2.6  | 1.5  | 2.4  | 2.4  | 2.8  | 3.4  | 1.7  | 1.8  | 1.2  | 1.4  | 2.0  |
| D630003M21Rik | 0.2  | 0.2  | 0.2  | 0.1  | 0.3  | 0.2  | 0.2  | 0.3  | 0.3  | 0.2  | 0.2  | 0.1  |
| D630010B17Rik | 0.4  | 0.5  | 0.8  | 0.3  | 0.8  | 0.2  | 1.0  | 1.4  | 1.6  | 1.5  | 0.9  | 0.7  |
| D630023F18Rik | 0.0  | 0.0  | 0.0  | 0.0  | 0.0  | 0.0  | 0.0  | 0.0  | 0.0  | 0.0  | 0.0  | 0.0  |
| D630029K05Rik | 0.1  | 0.2  | 0.2  | 0.1  | 0.2  | 0.3  | 0.1  | 0.1  | 0.1  | 0.0  | 0.0  | 0.1  |
| D630032N06Rik | 0.5  | 0.5  | 0.6  | 1.5  | 1.0  | 1.0  | 0.4  | 0.7  | 0.9  | 0.2  | 1.1  | 0.7  |
| D630033O11Rik | 0.1  | 0.1  | 0.2  | 0.0  | 0.1  | 0.0  | 0.0  | 0.1  | 0.0  | 0.0  | 0.1  | 0.0  |
| D630037F22Rik | 2.1  | 2.4  | 2.3  | 2.0  | 1.9  | 2.9  | 1.7  | 2.0  | 1.6  | 1.8  | 1.9  | 2.0  |
| D630039A03Rik | 0.0  | 0.0  | 0.0  | 0.0  | 0.0  | 0.1  | 0.1  | 0.0  | 0.0  | 0.1  | 0.0  | 0.0  |
| D630041G03Rik | 0.1  | 0.1  | 0.1  | 0.2  | 0.1  | 0.2  | 0.1  | 0.1  | 0.1  | 0.1  | 0.1  | 0.1  |
| D630045J12Rik | 0.4  | 0.6  | 0.8  | 0.4  | 0.4  | 0.8  | 0.5  | 0.4  | 0.4  | 0.3  | 0.3  | 0.3  |
| D630045M09Rik | 1.2  | 0.6  | 0.5  | 1.3  | 0.5  | 0.7  | 1.0  | 0.4  | 0.5  | 0.6  | 1.4  | 0.3  |
| D6Ert527e     | 0.0  | 0.0  | 0.1  | 0.1  | 0.0  | 0.0  | 0.0  | 0.1  | 0.0  | 0.0  | 0.1  | 0.1  |
| D6Wsu163e     | 11.6 | 11.5 | 9.7  | 14.1 | 11.0 | 11.9 | 8.7  | 8.4  | 8.9  | 9.9  | 10.3 | 11.7 |
| D730001G18Rik | 0.1  | 0.0  | 0.1  | 0.0  | 0.0  | 0.0  | 0.0  | 0.0  | 0.0  | 0.0  | 0.0  | 0.0  |
| D730005E14Rik | 0.1  | 0.1  | 0.3  | 0.0  | 0.2  | 0.1  | 0.2  | 0.3  | 0.2  | 0.1  | 0.2  | 0.3  |
| D730039F16Rik | 0.4  | 0.3  | 0.1  | 0.1  | 0.1  | 0.2  | 0.0  | 0.0  | 0.1  | 0.1  | 0.1  | 0.1  |
| D7Ert443e     | 0.0  | 0.1  | 0.0  | 0.1  | 0.0  | 0.0  | 0.0  | 0.1  | 0.1  | 0.0  | 0.1  | 0.0  |
| D7Ert715e     | 0.4  | 0.6  | 0.8  | 0.7  | 0.5  | 0.7  | 0.7  | 0.4  | 0.7  | 0.4  | 1.0  | 1.0  |
| D830005E20Rik | 0.0  | 0.0  | 0.0  | 0.0  | 0.0  | 0.0  | 0.0  | 0.0  | 0.0  | 0.0  | 0.0  | 0.0  |

Online Table 1

|               |       |       |       |       |       |       |       |       |       |       |       |       |
|---------------|-------|-------|-------|-------|-------|-------|-------|-------|-------|-------|-------|-------|
| D830030K20Rik | 0.1   | 0.1   | 0.2   | 0.1   | 0.2   | 0.2   | 0.1   | 0.1   | 0.1   | 0.1   | 0.1   | 0.0   |
| D830031N03Rik | 15.4  | 9.3   | 6.5   | 8.1   | 5.9   | 9.2   | 8.3   | 7.6   | 7.9   | 11.8  | 13.6  | 9.6   |
| D830046C22Rik | 0.0   | 0.0   | 0.0   | 0.0   | 0.1   | 0.0   | 0.1   | 0.0   | 0.0   | 0.0   | 0.0   | 0.0   |
| D8Ertid738e   | 87.4  | 76.5  | 64.8  | 95.5  | 80.5  | 86.4  | 75.9  | 93.4  | 79.9  | 86.8  | 84.9  | 79.6  |
| D8Ertid82e    | 1.1   | 1.3   | 2.2   | 1.3   | 2.6   | 0.6   | 2.6   | 2.7   | 3.8   | 1.7   | 1.9   | 2.0   |
| D930015E06Rik | 1.5   | 2.3   | 2.2   | 1.4   | 2.1   | 1.4   | 1.3   | 1.9   | 1.4   | 1.3   | 1.3   | 1.0   |
| D930015M05Rik | 0.3   | 0.4   | 0.3   | 0.2   | 0.2   | 0.2   | 0.3   | 0.1   | 0.2   | 0.3   | 0.3   | 0.2   |
| D930016D06Rik | 0.8   | 0.9   | 0.9   | 0.8   | 0.7   | 0.6   | 0.8   | 0.9   | 0.7   | 0.7   | 0.9   | 0.9   |
| D930048N14Rik | 0.1   | 0.1   | 0.1   | 0.0   | 0.2   | 0.3   | 0.2   | 0.1   | 0.1   | 0.0   | 0.0   | 0.1   |
| Daam1         | 16.6  | 16.7  | 18.3  | 15.6  | 18.3  | 12.5  | 16.7  | 16.4  | 13.7  | 13.8  | 16.9  | 16.6  |
| Daam2         | 0.2   | 0.3   | 0.3   | 0.2   | 0.3   | 0.4   | 0.3   | 0.3   | 0.4   | 1.2   | 0.8   | 0.6   |
| Dab1          | 0.1   | 0.0   | 0.0   | 0.1   | 0.0   | 0.0   | 0.1   | 0.0   | 0.0   | 0.0   | 0.0   | 0.0   |
| Dab2          | 9.0   | 8.5   | 10.8  | 12.2  | 14.0  | 6.7   | 7.2   | 8.4   | 5.7   | 10.5  | 8.7   | 8.0   |
| Dab2ip        | 12.6  | 14.9  | 13.5  | 12.9  | 13.3  | 14.9  | 15.2  | 15.3  | 14.7  | 11.5  | 13.3  | 12.2  |
| Dach1         | 0.1   | 0.0   | 0.0   | 0.0   | 0.0   | 0.0   | 0.0   | 0.0   | 0.0   | 0.0   | 0.0   | 0.0   |
| Dach2         | 0.2   | 0.0   | 0.0   | 0.1   | 0.0   | 0.0   | 0.0   | 0.0   | 0.0   | 0.0   | 0.0   | 0.0   |
| Dact1         | 4.0   | 8.2   | 10.7  | 3.1   | 5.2   | 2.4   | 8.1   | 21.3  | 14.7  | 5.9   | 6.6   | 9.7   |
| Dact2         | 0.1   | 0.1   | 0.1   | 0.1   | 0.1   | 0.2   | 0.1   | 0.1   | 0.1   | 0.2   | 0.1   | 0.1   |
| Dact3         | 12.8  | 17.5  | 26.1  | 9.7   | 12.4  | 10.1  | 18.8  | 26.1  | 23.4  | 14.4  | 13.7  | 17.3  |
| Dad1          | 133.9 | 113.8 | 108.6 | 176.9 | 118.3 | 136.9 | 139.1 | 112.0 | 107.8 | 123.8 | 136.8 | 118.1 |
| Daf2          | 0.4   | 0.7   | 0.8   | 0.3   | 0.4   | 0.3   | 0.5   | 1.1   | 0.3   | 0.3   | 0.5   | 0.5   |
| Dag1          | 26.2  | 25.7  | 29.1  | 27.7  | 25.8  | 30.7  | 35.5  | 36.5  | 38.0  | 36.6  | 34.5  | 32.8  |
| Dagla         | 0.7   | 0.7   | 0.7   | 0.7   | 0.8   | 0.8   | 0.8   | 0.8   | 1.0   | 0.5   | 0.6   | 0.6   |
| Daglb         | 9.9   | 8.3   | 7.9   | 10.5  | 9.7   | 10.9  | 8.6   | 10.6  | 7.5   | 6.7   | 7.5   | 7.3   |
| Dak           | 5.3   | 5.5   | 4.4   | 3.7   | 4.6   | 5.9   | 4.8   | 5.0   | 5.8   | 11.8  | 6.4   | 5.2   |
| Dalrd3        | 6.9   | 6.3   | 5.0   | 7.7   | 6.4   | 7.0   | 5.8   | 6.4   | 7.0   | 8.1   | 5.8   | 5.3   |
| Dancr         | 1.3   | 1.5   | 1.0   | 2.2   | 1.6   | 0.7   | 1.3   | 1.4   | 1.8   | 1.7   | 1.5   | 1.5   |
| Dand5         | 2.3   | 1.9   | 2.1   | 2.8   | 2.2   | 2.4   | 2.1   | 2.5   | 2.0   | 2.1   | 2.6   | 1.9   |
| Dap           | 91.9  | 91.8  | 75.5  | 114.1 | 87.3  | 116.5 | 95.4  | 84.8  | 70.3  | 68.4  | 91.1  | 77.8  |
| Dap3          | 8.5   | 8.2   | 6.8   | 7.4   | 8.0   | 7.9   | 7.7   | 8.5   | 7.3   | 7.9   | 8.0   | 7.7   |
| Dapk1         | 7.2   | 10.1  | 17.0  | 5.0   | 8.0   | 4.4   | 5.9   | 9.7   | 7.4   | 7.9   | 6.5   | 8.6   |
| Dapk2         | 1.5   | 0.4   | 0.5   | 0.6   | 0.5   | 0.2   | 0.4   | 0.9   | 0.7   | 0.3   | 0.2   | 0.2   |
| Dapk3         | 15.4  | 13.7  | 11.2  | 13.0  | 12.3  | 12.7  | 13.2  | 14.1  | 13.2  | 15.2  | 13.4  | 13.5  |
| Dapp1         | 3.3   | 3.7   | 4.2   | 3.1   | 3.8   | 3.3   | 3.4   | 4.7   | 3.8   | 3.5   | 3.7   | 4.7   |
| Dars          | 52.5  | 52.1  | 41.9  | 51.9  | 47.7  | 50.1  | 39.6  | 41.8  | 42.0  | 51.0  | 51.2  | 48.7  |
| Dars2         | 5.2   | 5.8   | 5.6   | 3.9   | 4.4   | 4.9   | 4.3   | 4.6   | 5.1   | 4.5   | 5.0   | 4.6   |
| Daxx          | 13.2  | 14.4  | 13.3  | 15.2  | 12.7  | 11.3  | 13.3  | 12.4  | 12.7  | 10.4  | 12.4  | 13.5  |
| Dazap1        | 11.5  | 12.9  | 15.9  | 12.6  | 14.2  | 12.1  | 15.6  | 16.1  | 15.2  | 14.8  | 14.9  | 13.3  |
| Dazap2        | 44.0  | 43.2  | 43.9  | 52.0  | 50.2  | 43.6  | 41.2  | 47.6  | 44.8  | 45.1  | 42.3  | 44.1  |
| Dazl          | 0.0   | 0.0   | 0.0   | 0.0   | 0.0   | 0.0   | 0.0   | 0.1   | 0.0   | 0.0   | 0.0   | 0.0   |
| Dbc1          | 0.5   | 0.4   | 0.4   | 0.2   | 0.3   | 0.2   | 0.5   | 0.6   | 0.3   | 0.7   | 0.8   | 0.7   |
| Dbf4          | 6.5   | 8.3   | 9.3   | 5.5   | 8.6   | 5.6   | 9.5   | 5.6   | 9.1   | 6.1   | 9.2   | 7.2   |
| Dbh           | 0.0   | 0.0   | 0.0   | 0.0   | 0.0   | 0.0   | 0.0   | 0.0   | 0.0   | 0.0   | 0.0   | 0.0   |
| Dbi           | 375.9 | 459.0 | 423.2 | 355.8 | 306.7 | 323.0 | 454.8 | 565.6 | 438.4 | 284.5 | 498.4 | 379.9 |
| Dbil5         | 0.0   | 0.0   | 0.3   | 0.0   | 0.3   | 0.4   | 0.1   | 0.3   | 0.2   | 0.1   | 0.0   | 0.1   |
| Dbn1          | 62.5  | 55.5  | 43.4  | 75.1  | 53.4  | 64.9  | 65.1  | 52.4  | 56.7  | 55.3  | 61.2  | 50.0  |
| Dbndd1        | 0.8   | 0.6   | 0.7   | 0.6   | 0.5   | 1.1   | 0.4   | 1.2   | 0.4   | 0.9   | 0.4   | 0.5   |
| Dbndd2        | 6.2   | 6.5   | 5.7   | 3.8   | 5.0   | 2.8   | 4.5   | 6.8   | 6.4   | 7.3   | 6.9   | 6.1   |
| Dbnl          | 27.1  | 24.9  | 25.4  | 29.6  | 27.0  | 25.1  | 28.8  | 27.1  | 27.2  | 27.9  | 27.5  | 30.5  |
| Dbp           | 16.2  | 17.3  | 20.9  | 13.5  | 9.2   | 23.0  | 9.9   | 14.9  | 8.5   | 11.4  | 9.2   | 12.6  |
| Dbr1          | 6.0   | 5.2   | 6.7   | 5.4   | 5.6   | 5.8   | 6.4   | 5.3   | 5.5   | 6.0   | 6.0   | 5.9   |
| Dbt           | 8.7   | 8.2   | 9.4   | 8.6   | 7.4   | 8.8   | 7.0   | 6.5   | 6.2   | 7.2   | 8.2   | 7.9   |
| Dcaf10        | 4.6   | 5.4   | 4.6   | 4.4   | 4.2   | 4.5   | 4.2   | 4.7   | 5.2   | 5.0   | 4.9   | 4.9   |
| Dcaf11        | 13.7  | 13.8  | 12.0  | 14.0  | 13.9  | 12.7  | 12.0  | 10.9  | 12.3  | 11.1  | 11.8  | 11.8  |
| Dcaf12        | 13.1  | 14.0  | 13.2  | 13.1  | 15.3  | 13.3  | 13.3  | 12.6  | 14.6  | 14.1  | 14.2  | 12.7  |
| Dcaf12l1      | 0.1   | 0.1   | 0.1   | 0.1   | 0.0   | 0.1   | 0.1   | 0.0   | 0.1   | 1.8   | 0.8   | 0.4   |
| Dcaf12l2      | 0.0   | 0.0   | 0.0   | 0.0   | 0.0   | 0.0   | 0.0   | 0.0   | 0.1   | 2.1   | 0.6   | 0.3   |

Online Table 1

|         |       |       |       |       |       |       |       |       |       |       |       |       |
|---------|-------|-------|-------|-------|-------|-------|-------|-------|-------|-------|-------|-------|
| Dcaf13  | 30.6  | 26.8  | 23.4  | 31.4  | 24.3  | 24.1  | 26.7  | 25.4  | 23.9  | 27.1  | 28.8  | 28.9  |
| Dcaf15  | 3.4   | 4.1   | 4.0   | 3.2   | 3.9   | 2.9   | 5.0   | 4.1   | 5.1   | 3.4   | 3.4   | 2.9   |
| Dcaf17  | 3.5   | 3.6   | 3.8   | 2.7   | 2.9   | 2.5   | 2.8   | 3.9   | 3.1   | 2.9   | 2.8   | 2.8   |
| Dcaf4   | 11.2  | 11.7  | 11.1  | 10.1  | 9.1   | 10.9  | 9.7   | 9.0   | 9.5   | 11.1  | 10.6  | 9.9   |
| Dcaf5   | 12.5  | 12.8  | 11.5  | 14.7  | 12.1  | 13.9  | 12.7  | 9.8   | 10.8  | 10.6  | 10.8  | 12.6  |
| Dcaf6   | 21.7  | 19.8  | 21.0  | 20.0  | 18.5  | 22.2  | 17.8  | 20.5  | 18.3  | 17.7  | 22.1  | 19.8  |
| Dcaf7   | 19.6  | 20.9  | 19.6  | 19.0  | 20.3  | 19.6  | 19.5  | 20.3  | 20.6  | 21.7  | 18.8  | 18.3  |
| Dcaf8   | 36.4  | 37.5  | 41.5  | 38.8  | 29.1  | 37.6  | 32.9  | 36.6  | 33.1  | 34.5  | 36.1  | 38.7  |
| Dcakd   | 6.4   | 7.8   | 8.4   | 8.8   | 8.4   | 7.3   | 7.9   | 9.5   | 7.2   | 7.2   | 7.3   | 6.4   |
| Dcbl1   | 1.4   | 1.5   | 1.7   | 1.2   | 1.4   | 1.2   | 1.5   | 1.4   | 1.4   | 1.3   | 1.0   | 1.5   |
| Dcbl2   | 53.3  | 53.0  | 43.7  | 43.5  | 43.6  | 44.3  | 56.5  | 40.6  | 57.6  | 47.5  | 52.5  | 52.6  |
| Dcc     | 0.0   | 0.0   | 0.0   | 0.0   | 0.0   | 0.0   | 0.0   | 0.0   | 0.0   | 0.0   | 0.0   | 0.0   |
| Dcdc2a  | 0.0   | 0.0   | 0.0   | 0.0   | 0.0   | 0.0   | 0.0   | 0.0   | 0.0   | 0.0   | 0.0   | 0.0   |
| Dcdc2b  | 0.2   | 0.4   | 0.2   | 0.2   | 0.1   | 0.5   | 0.0   | 0.1   | 0.0   | 0.1   | 0.3   | 0.2   |
| Dcdc2c  | 5.7   | 7.0   | 5.1   | 4.6   | 6.8   | 4.6   | 5.9   | 4.7   | 4.9   | 5.1   | 4.1   | 4.4   |
| Dchs1   | 0.1   | 0.1   | 0.1   | 0.1   | 0.0   | 0.0   | 0.0   | 0.1   | 0.1   | 0.0   | 0.0   | 0.0   |
| Dck     | 2.3   | 2.3   | 2.9   | 2.2   | 5.2   | 1.6   | 4.0   | 2.4   | 2.8   | 1.7   | 2.9   | 1.8   |
| Dclk1   | 12.0  | 16.9  | 35.7  | 15.0  | 33.6  | 10.8  | 34.0  | 54.1  | 42.6  | 17.5  | 22.8  | 35.8  |
| Dclk2   | 0.9   | 0.6   | 1.0   | 0.9   | 0.6   | 0.9   | 0.5   | 0.6   | 0.5   | 0.5   | 0.6   | 0.5   |
| Dclk3   | 1.9   | 2.4   | 6.2   | 1.0   | 1.4   | 0.6   | 0.5   | 3.0   | 1.7   | 0.9   | 0.7   | 2.1   |
| Dclre1a | 5.9   | 5.3   | 5.3   | 6.4   | 4.0   | 6.7   | 4.2   | 4.6   | 3.7   | 3.2   | 3.8   | 3.6   |
| Dclre1b | 1.1   | 1.6   | 1.6   | 1.6   | 1.6   | 1.0   | 1.3   | 1.2   | 1.3   | 1.2   | 1.8   | 1.5   |
| Dclre1c | 1.7   | 1.6   | 1.8   | 1.8   | 2.1   | 2.0   | 1.8   | 1.7   | 1.8   | 1.3   | 1.5   | 1.4   |
| Dcn     | 442.4 | 536.9 | 758.9 | 374.0 | 411.1 | 220.9 | 245.8 | 524.1 | 341.8 | 355.9 | 244.3 | 418.5 |
| Dcp1a   | 3.1   | 3.9   | 3.8   | 3.2   | 3.7   | 3.1   | 3.7   | 3.9   | 3.9   | 3.3   | 3.9   | 3.5   |
| Dcp1b   | 0.8   | 0.6   | 0.8   | 1.0   | 0.7   | 1.1   | 0.7   | 0.7   | 0.5   | 0.9   | 0.8   | 0.5   |
| Dcp2    | 5.1   | 6.1   | 6.0   | 4.7   | 5.9   | 4.9   | 4.5   | 4.7   | 5.2   | 5.3   | 5.2   | 5.4   |
| Dcps    | 5.8   | 5.7   | 6.5   | 6.4   | 6.7   | 6.3   | 8.6   | 8.2   | 7.3   | 5.6   | 6.0   | 6.2   |
| Dcst1   | 0.0   | 0.1   | 0.1   | 0.0   | 0.0   | 0.0   | 0.1   | 0.1   | 0.1   | 0.1   | 0.0   | 0.0   |
| Dct     | 0.0   | 0.0   | 0.0   | 0.0   | 0.0   | 0.0   | 0.0   | 0.0   | 0.0   | 0.0   | 0.0   | 0.0   |
| Dctd    | 4.1   | 3.4   | 2.8   | 4.2   | 3.1   | 3.8   | 2.9   | 3.3   | 2.1   | 3.8   | 3.4   | 2.6   |
| Dctn1   | 28.5  | 29.7  | 29.5  | 30.6  | 30.1  | 27.9  | 32.2  | 28.0  | 30.0  | 27.7  | 29.7  | 28.5  |
| Dctn2   | 82.7  | 77.1  | 69.7  | 76.5  | 68.5  | 85.3  | 77.3  | 80.3  | 84.3  | 72.6  | 76.8  | 76.4  |
| Dctn3   | 49.4  | 48.7  | 42.4  | 54.4  | 45.0  | 47.7  | 40.0  | 45.8  | 43.4  | 45.7  | 42.1  | 43.8  |
| Dctn4   | 23.6  | 24.4  | 26.4  | 24.8  | 23.7  | 25.6  | 26.7  | 28.7  | 27.1  | 26.4  | 28.8  | 27.6  |
| Dctn5   | 34.8  | 30.3  | 29.7  | 40.1  | 30.7  | 41.1  | 30.4  | 28.7  | 28.0  | 27.6  | 32.7  | 30.6  |
| Dctn6   | 42.3  | 43.6  | 48.4  | 62.1  | 44.9  | 50.5  | 54.3  | 47.9  | 45.4  | 52.8  | 64.5  | 60.0  |
| Dctpp1  | 10.5  | 8.5   | 10.2  | 7.0   | 11.0  | 9.7   | 9.2   | 9.6   | 9.6   | 9.1   | 7.7   | 5.7   |
| Dcun1d1 | 8.5   | 8.6   | 10.4  | 10.0  | 8.9   | 11.4  | 8.4   | 9.1   | 8.7   | 11.6  | 12.4  | 12.2  |
| Dcun1d2 | 7.9   | 6.6   | 7.0   | 9.9   | 8.6   | 8.8   | 7.2   | 7.9   | 7.1   | 8.3   | 10.1  | 8.2   |
| Dcun1d3 | 7.6   | 9.0   | 8.3   | 8.0   | 8.0   | 9.1   | 7.9   | 8.2   | 7.8   | 8.1   | 9.8   | 7.2   |
| Dcun1d4 | 6.5   | 7.2   | 6.7   | 5.7   | 5.5   | 5.1   | 5.7   | 6.9   | 6.2   | 5.9   | 6.9   | 5.2   |
| Dcun1d5 | 36.9  | 35.0  | 30.5  | 28.6  | 32.5  | 29.4  | 28.4  | 32.3  | 38.6  | 38.5  | 32.0  | 36.8  |
| Dcxr    | 62.7  | 59.1  | 58.5  | 35.7  | 47.3  | 54.1  | 40.0  | 31.3  | 42.9  | 55.9  | 42.9  | 45.7  |
| Dda1    | 27.7  | 26.3  | 23.0  | 30.0  | 24.9  | 28.4  | 31.1  | 28.1  | 27.7  | 25.8  | 28.4  | 26.1  |
| Ddah1   | 27.1  | 25.6  | 33.1  | 22.0  | 28.8  | 22.9  | 50.8  | 46.5  | 43.7  | 52.8  | 57.3  | 57.0  |
| Ddah2   | 20.8  | 17.1  | 15.7  | 21.4  | 13.9  | 24.1  | 21.1  | 24.3  | 29.6  | 18.2  | 19.7  | 17.1  |
| Ddb1    | 264.2 | 235.6 | 210.3 | 235.0 | 221.3 | 245.9 | 218.9 | 217.6 | 213.2 | 253.9 | 240.5 | 234.2 |
| Ddb2    | 2.6   | 2.7   | 3.3   | 4.1   | 3.2   | 3.9   | 3.5   | 3.8   | 3.1   | 2.4   | 3.0   | 3.1   |
| Ddc     | 0.4   | 0.2   | 0.1   | 0.2   | 0.1   | 0.2   | 0.0   | 0.1   | 0.1   | 0.7   | 0.5   | 0.1   |
| Ddhd1   | 3.4   | 3.3   | 3.4   | 3.1   | 3.0   | 2.8   | 3.4   | 2.7   | 2.8   | 3.7   | 3.1   | 3.5   |
| Ddhd2   | 11.7  | 10.6  | 9.7   | 12.3  | 9.8   | 11.6  | 9.3   | 9.5   | 8.6   | 9.1   | 9.9   | 9.6   |
| Ddi1    | 0.1   | 0.2   | 0.1   | 0.0   | 0.0   | 0.1   | 0.0   | 0.0   | 0.0   | 0.1   | 0.1   | 0.0   |
| Ddi2    | 14.8  | 14.0  | 16.9  | 16.7  | 16.3  | 13.8  | 14.7  | 14.5  | 12.5  | 12.7  | 13.3  | 13.6  |
| Ddit3   | 107.6 | 46.4  | 32.1  | 183.9 | 46.3  | 124.0 | 45.8  | 38.1  | 41.8  | 45.4  | 56.7  | 55.7  |
| Ddit4   | 8.4   | 12.6  | 13.1  | 6.8   | 12.1  | 10.4  | 12.6  | 15.3  | 17.7  | 15.8  | 11.8  | 12.2  |
| Ddit4l  | 7.4   | 7.2   | 6.3   | 6.6   | 6.2   | 7.7   | 5.7   | 7.1   | 8.0   | 15.2  | 8.9   | 10.1  |

Online Table 1



|        |       |       |       |       |       |       |       |       |       |       |       |       |
|--------|-------|-------|-------|-------|-------|-------|-------|-------|-------|-------|-------|-------|
| Ddn    | 0.0   | 0.0   | 0.0   | 0.0   | 0.0   | 0.1   | 0.0   | 0.0   | 0.0   | 0.0   | 0.0   | 0.0   |
| DDo    | 1.4   | 0.4   | 0.5   | 0.9   | 0.3   | 1.1   | 0.0   | 0.1   | 0.2   | 0.3   | 0.2   | 0.3   |
| Ddost  | 113.6 | 96.9  | 101.0 | 124.0 | 98.6  | 123.3 | 106.0 | 107.8 | 97.0  | 104.6 | 101.3 | 107.5 |
| Ddr1   | 42.6  | 47.9  | 41.8  | 34.3  | 37.1  | 35.1  | 46.2  | 39.6  | 47.6  | 48.8  | 38.4  | 38.5  |
| Ddr2   | 54.4  | 47.8  | 45.1  | 56.2  | 39.9  | 58.0  | 36.1  | 38.8  | 34.9  | 36.6  | 43.5  | 32.8  |
| Ddrgk1 | 43.1  | 33.7  | 38.5  | 67.6  | 33.9  | 50.0  | 47.8  | 34.6  | 31.3  | 36.1  | 41.4  | 48.9  |
| Ddt    | 17.2  | 18.1  | 18.8  | 16.8  | 14.6  | 19.7  | 15.3  | 18.2  | 16.0  | 16.5  | 13.3  | 14.8  |
| Ddx1   | 79.8  | 73.6  | 69.9  | 79.2  | 63.8  | 77.6  | 65.2  | 64.6  | 56.8  | 63.1  | 71.2  | 69.7  |
| Ddx10  | 8.9   | 8.8   | 9.4   | 9.9   | 8.3   | 7.8   | 9.2   | 8.6   | 7.1   | 8.3   | 9.8   | 9.2   |
| Ddx11  | 0.7   | 1.0   | 1.5   | 0.6   | 1.0   | 0.7   | 1.4   | 1.1   | 1.1   | 0.9   | 0.8   | 0.8   |
| Ddx17  | 61.8  | 72.8  | 70.5  | 53.9  | 62.3  | 63.1  | 57.9  | 64.1  | 69.5  | 61.7  | 61.3  | 63.3  |
| Ddx18  | 18.6  | 19.0  | 16.2  | 18.9  | 18.2  | 19.9  | 17.3  | 16.8  | 14.7  | 18.6  | 18.6  | 16.4  |
| Ddx19a | 6.4   | 6.8   | 7.4   | 7.7   | 6.9   | 6.4   | 5.8   | 6.8   | 5.9   | 6.2   | 6.5   | 5.9   |
| Ddx19b | 2.6   | 2.6   | 2.2   | 2.7   | 2.6   | 2.6   | 2.2   | 2.2   | 2.1   | 2.3   | 2.4   | 2.3   |
| Ddx20  | 4.8   | 5.0   | 5.1   | 4.5   | 4.8   | 4.6   | 4.4   | 3.9   | 3.7   | 4.9   | 4.4   | 4.0   |
| Ddx21  | 23.3  | 21.6  | 19.1  | 26.2  | 23.9  | 19.9  | 27.8  | 23.3  | 20.4  | 22.6  | 26.2  | 23.5  |
| Ddx23  | 32.0  | 29.1  | 28.8  | 37.4  | 28.9  | 30.9  | 32.7  | 27.9  | 26.4  | 27.1  | 32.6  | 32.1  |
| Ddx24  | 49.2  | 39.4  | 38.8  | 52.8  | 42.0  | 49.0  | 43.6  | 36.6  | 34.9  | 39.3  | 41.3  | 47.1  |
| Ddx25  | 0.0   | 0.0   | 0.0   | 0.0   | 0.0   | 0.0   | 0.0   | 0.1   | 0.1   | 0.0   | 0.0   | 0.0   |
| Ddx26b | 0.6   | 0.7   | 0.8   | 0.9   | 1.0   | 0.9   | 0.4   | 0.7   | 0.6   | 0.5   | 0.7   | 0.5   |
| Ddx27  | 12.3  | 11.6  | 11.4  | 16.2  | 11.1  | 13.1  | 14.2  | 11.8  | 10.6  | 10.0  | 13.6  | 12.5  |
| Ddx28  | 5.1   | 5.1   | 3.7   | 4.0   | 5.1   | 4.5   | 4.6   | 5.5   | 4.9   | 4.2   | 4.3   | 5.4   |
| Ddx31  | 4.1   | 3.6   | 3.0   | 4.2   | 4.2   | 4.2   | 3.6   | 3.2   | 3.0   | 3.3   | 3.6   | 2.6   |
| Ddx39  | 14.5  | 9.5   | 7.6   | 11.7  | 12.9  | 9.5   | 13.4  | 10.4  | 10.9  | 11.5  | 13.3  | 9.2   |
| Ddx39b | 49.5  | 46.6  | 49.5  | 43.5  | 45.0  | 47.7  | 51.5  | 53.2  | 48.3  | 49.0  | 47.3  | 43.8  |
| Ddx3x  | 63.7  | 69.8  | 78.9  | 73.2  | 70.0  | 66.5  | 63.6  | 67.8  | 63.1  | 66.8  | 72.2  | 75.2  |
| Ddx3y  | 33.3  | 27.7  | 31.5  | 41.0  | 29.1  | 36.4  | 26.3  | 26.4  | 21.1  | 29.2  | 33.8  | 37.6  |
| Ddx4   | 0.3   | 0.3   | 0.3   | 0.0   | 0.2   | 0.1   | 0.1   | 0.2   | 0.2   | 0.5   | 0.3   | 0.2   |
| Ddx41  | 7.8   | 8.4   | 7.3   | 8.1   | 9.0   | 9.6   | 8.0   | 7.5   | 7.1   | 9.8   | 8.0   | 8.0   |
| Ddx42  | 20.5  | 20.7  | 22.4  | 22.1  | 19.9  | 19.2  | 21.3  | 21.7  | 20.4  | 19.8  | 23.4  | 24.8  |
| Ddx43  | 0.0   | 0.0   | 0.0   | 0.1   | 0.0   | 0.0   | 0.0   | 0.0   | 0.0   | 0.0   | 0.0   | 0.0   |
| Ddx46  | 11.2  | 9.6   | 10.7  | 14.1  | 11.2  | 10.8  | 12.8  | 10.2  | 9.4   | 9.4   | 11.5  | 11.5  |
| Ddx47  | 18.9  | 19.6  | 19.4  | 20.1  | 19.3  | 20.4  | 17.6  | 19.7  | 18.3  | 21.9  | 19.4  | 19.8  |
| Ddx49  | 17.0  | 15.3  | 12.0  | 15.9  | 15.8  | 17.4  | 16.0  | 15.4  | 15.8  | 15.8  | 16.2  | 14.2  |
| Ddx5   | 148.8 | 151.7 | 163.1 | 144.6 | 146.5 | 137.3 | 146.4 | 152.0 | 163.3 | 166.0 | 164.4 | 177.6 |
| Ddx50  | 49.7  | 49.5  | 46.6  | 47.5  | 38.6  | 46.0  | 43.5  | 40.5  | 40.3  | 46.2  | 50.4  | 51.4  |
| Ddx51  | 1.6   | 1.7   | 1.6   | 1.3   | 1.6   | 1.5   | 1.6   | 1.6   | 1.4   | 1.6   | 1.3   | 1.4   |
| Ddx52  | 12.5  | 11.2  | 11.5  | 9.9   | 10.5  | 11.8  | 8.6   | 9.9   | 9.6   | 10.6  | 9.9   | 10.1  |
| Ddx54  | 13.0  | 13.3  | 12.5  | 14.0  | 14.5  | 14.0  | 14.7  | 14.6  | 13.3  | 13.0  | 14.0  | 12.4  |
| Ddx55  | 2.9   | 2.6   | 3.2   | 3.5   | 2.7   | 3.1   | 2.6   | 2.8   | 2.6   | 2.4   | 3.3   | 2.8   |
| Ddx56  | 9.0   | 7.1   | 5.5   | 7.8   | 7.3   | 9.4   | 7.4   | 6.6   | 6.3   | 6.9   | 6.7   | 6.1   |
| Ddx58  | 19.4  | 12.3  | 16.8  | 21.9  | 16.6  | 15.0  | 14.3  | 11.2  | 12.5  | 12.7  | 12.9  | 20.9  |
| Ddx59  | 3.4   | 3.3   | 2.8   | 2.9   | 2.5   | 3.0   | 2.9   | 3.2   | 2.5   | 3.1   | 3.7   | 3.3   |
| Ddx6   | 17.9  | 23.6  | 26.7  | 18.3  | 23.4  | 21.0  | 20.2  | 24.6  | 21.0  | 24.5  | 25.3  | 26.3  |
| Ddx60  | 0.8   | 0.5   | 0.8   | 0.6   | 0.7   | 0.4   | 0.4   | 0.4   | 0.5   | 0.2   | 0.4   | 0.6   |
| Deaf1  | 2.9   | 3.1   | 2.8   | 2.6   | 2.4   | 2.4   | 3.2   | 2.8   | 2.4   | 3.3   | 2.8   | 2.5   |
| Dear1  | 0.9   | 0.1   | 0.1   | 0.3   | 0.4   | 0.4   | 0.5   | 0.2   | 0.2   | 0.1   | 0.4   | 0.6   |
| Deb1   | 19.3  | 16.1  | 15.2  | 15.4  | 16.0  | 17.4  | 14.4  | 21.6  | 14.5  | 16.5  | 24.2  | 17.8  |
| Decr1  | 21.7  | 19.1  | 16.3  | 17.4  | 15.8  | 17.6  | 16.7  | 17.6  | 18.0  | 19.8  | 17.4  | 19.7  |
| Decr2  | 20.3  | 19.3  | 16.8  | 16.5  | 16.5  | 19.6  | 17.0  | 18.5  | 19.7  | 17.8  | 18.2  | 17.5  |
| Dedd   | 7.2   | 7.4   | 6.5   | 6.4   | 6.8   | 7.0   | 7.1   | 7.1   | 6.5   | 8.0   | 8.3   | 8.1   |
| Dedd2  | 2.5   | 2.0   | 1.8   | 3.2   | 2.2   | 2.2   | 1.7   | 1.8   | 1.8   | 2.3   | 2.1   | 1.9   |
| Def6   | 7.0   | 6.4   | 7.4   | 8.2   | 9.5   | 6.0   | 5.1   | 5.5   | 4.8   | 6.5   | 6.1   | 5.0   |
| Def8   | 11.2  | 11.6  | 10.1  | 10.1  | 10.0  | 11.0  | 10.0  | 11.2  | 9.1   | 9.3   | 9.7   | 9.4   |
| Defb25 | 3.1   | 2.8   | 1.4   | 2.9   | 1.9   | 2.9   | 0.9   | 0.2   | 1.1   | 0.8   | 0.7   | 1.3   |
| Degs1  | 144.3 | 93.1  | 76.5  | 156.4 | 126.1 | 130.5 | 106.3 | 91.2  | 91.9  | 114.4 | 116.3 | 106.3 |
| Degs2  | 0.4   | 0.5   | 0.3   | 1.1   | 1.4   | 0.5   | 0.4   | 0.4   | 0.4   | 0.5   | 0.5   | 0.6   |

Online Table 1

|         |      |      |      |      |      |      |      |      |      |      |      |      |
|---------|------|------|------|------|------|------|------|------|------|------|------|------|
| Dek     | 11.5 | 14.0 | 22.6 | 11.3 | 16.6 | 9.9  | 18.9 | 16.8 | 15.3 | 15.2 | 20.0 | 19.8 |
| Dennd1a | 3.3  | 3.5  | 3.4  | 3.8  | 3.1  | 4.1  | 3.8  | 3.1  | 2.9  | 3.0  | 2.9  | 3.0  |
| Dennd1b | 2.8  | 3.3  | 3.1  | 3.2  | 3.2  | 3.1  | 2.9  | 2.8  | 2.7  | 3.0  | 2.9  | 3.0  |
| Dennd1c | 0.1  | 0.0  | 0.0  | 0.8  | 1.3  | 0.0  | 0.3  | 0.0  | 0.0  | 0.1  | 0.0  | 0.1  |
| Dennd2a | 10.0 | 10.0 | 8.1  | 8.9  | 8.5  | 10.0 | 9.9  | 9.8  | 9.7  | 7.4  | 9.7  | 7.7  |
| Dennd2c | 2.1  | 2.3  | 2.1  | 1.6  | 2.9  | 2.0  | 1.7  | 1.2  | 1.7  | 2.3  | 2.2  | 1.8  |
| Dennd2d | 0.2  | 0.2  | 0.1  | 0.2  | 0.3  | 0.2  | 0.2  | 0.1  | 0.2  | 0.3  | 0.3  | 0.2  |
| Dennd3  | 0.1  | 0.1  | 0.1  | 0.1  | 0.1  | 0.1  | 0.0  | 0.1  | 0.1  | 0.2  | 0.1  | 0.1  |
| Dennd4a | 6.5  | 7.1  | 7.8  | 7.5  | 5.8  | 6.9  | 6.6  | 8.5  | 7.0  | 4.6  | 6.5  | 7.0  |
| Dennd4b | 0.8  | 0.8  | 0.9  | 1.0  | 1.7  | 0.8  | 0.9  | 1.0  | 1.0  | 0.8  | 0.7  | 0.7  |
| Dennd4c | 9.1  | 9.6  | 9.8  | 10.3 | 9.3  | 10.4 | 8.5  | 8.6  | 8.7  | 9.8  | 9.7  | 9.5  |
| Dennd5a | 77.9 | 60.8 | 49.3 | 93.4 | 57.8 | 84.9 | 59.5 | 40.3 | 49.2 | 51.6 | 56.2 | 54.1 |
| Dennd5b | 1.7  | 2.3  | 2.1  | 1.6  | 1.8  | 1.5  | 2.1  | 1.6  | 2.1  | 2.2  | 2.3  | 2.7  |
| Dennd6a | 4.6  | 5.8  | 6.7  | 5.6  | 5.8  | 4.9  | 5.5  | 5.5  | 5.7  | 5.9  | 6.1  | 6.2  |
| Dennd6b | 0.5  | 0.5  | 0.4  | 0.4  | 0.4  | 0.5  | 0.3  | 0.4  | 0.4  | 0.3  | 0.4  | 0.3  |
| Denr    | 17.7 | 16.2 | 17.1 | 19.7 | 15.3 | 15.1 | 20.3 | 19.3 | 14.0 | 16.4 | 19.7 | 20.7 |
| Depdc1a | 0.7  | 1.5  | 3.4  | 0.1  | 2.8  | 0.3  | 2.8  | 1.2  | 3.2  | 1.4  | 3.5  | 2.1  |
| Depdc1b | 0.2  | 0.4  | 0.5  | 0.0  | 0.3  | 0.1  | 0.3  | 0.1  | 0.4  | 0.3  | 0.4  | 0.2  |
| Depdc5  | 3.4  | 4.0  | 4.4  | 2.9  | 2.8  | 3.7  | 2.9  | 3.4  | 3.1  | 2.7  | 3.1  | 3.5  |
| Depdc7  | 2.2  | 2.3  | 2.6  | 2.0  | 2.5  | 0.8  | 1.3  | 1.4  | 1.2  | 1.1  | 1.3  | 1.2  |
| Deptor  | 0.6  | 1.2  | 2.6  | 0.6  | 1.1  | 0.3  | 0.8  | 1.7  | 0.9  | 0.8  | 0.4  | 1.0  |
| Dera    | 6.8  | 7.6  | 6.2  | 6.1  | 7.7  | 4.8  | 6.8  | 7.8  | 7.2  | 6.2  | 7.2  | 6.9  |
| Derl1   | 72.3 | 67.7 | 54.8 | 66.9 | 62.0 | 72.1 | 61.1 | 68.2 | 71.6 | 70.5 | 66.3 | 69.3 |
| Derl2   | 13.8 | 14.7 | 14.7 | 14.1 | 14.3 | 15.1 | 14.8 | 15.6 | 15.7 | 13.5 | 14.7 | 15.4 |
| Derl3   | 0.6  | 0.8  | 0.6  | 1.0  | 0.3  | 0.8  | 0.3  | 0.3  | 0.2  | 1.4  | 0.9  | 0.7  |
| Des     | 1.6  | 0.9  | 0.6  | 1.6  | 1.1  | 1.9  | 0.7  | 1.0  | 2.6  | 36.3 | 18.2 | 10.4 |
| Desi1   | 5.6  | 6.5  | 5.9  | 5.6  | 6.9  | 4.8  | 7.1  | 7.5  | 6.2  | 6.1  | 6.1  | 5.7  |
| Desi2   | 8.5  | 9.6  | 9.0  | 8.8  | 9.0  | 9.3  | 7.9  | 9.6  | 10.4 | 10.1 | 10.8 | 9.7  |
| Det1    | 5.1  | 5.0  | 4.2  | 5.0  | 5.2  | 5.8  | 4.1  | 4.7  | 4.0  | 4.9  | 5.1  | 3.9  |
| Dexi    | 6.5  | 7.7  | 6.5  | 6.2  | 6.0  | 7.3  | 5.6  | 6.7  | 6.9  | 6.6  | 5.4  | 6.1  |
| Dffa    | 3.2  | 4.1  | 3.8  | 3.6  | 4.5  | 3.0  | 3.8  | 4.2  | 4.2  | 3.3  | 4.1  | 3.6  |
| Dffb    | 1.0  | 0.9  | 0.9  | 0.5  | 1.0  | 0.9  | 0.9  | 0.8  | 0.9  | 0.8  | 0.8  | 1.0  |
| Dfna5   | 1.4  | 1.6  | 1.4  | 2.3  | 1.3  | 2.3  | 0.8  | 1.2  | 0.9  | 1.1  | 1.2  | 1.1  |
| Dfnb59  | 0.0  | 0.1  | 0.1  | 0.0  | 0.1  | 0.0  | 0.1  | 0.0  | 0.0  | 0.0  | 0.0  | 0.1  |
| Dgat1   | 7.0  | 6.5  | 5.8  | 7.2  | 5.9  | 7.7  | 6.2  | 6.4  | 7.4  | 5.8  | 5.8  | 6.3  |
| Dgat2   | 1.8  | 2.2  | 2.7  | 1.8  | 1.8  | 1.9  | 2.3  | 1.7  | 1.9  | 2.0  | 1.6  | 1.4  |
| Dgcr14  | 4.8  | 5.3  | 5.5  | 5.1  | 5.2  | 5.7  | 5.3  | 5.3  | 4.2  | 4.3  | 4.7  | 4.3  |
| Dgcr2   | 14.2 | 16.0 | 16.0 | 12.9 | 15.9 | 14.7 | 19.7 | 23.0 | 19.0 | 14.7 | 15.5 | 13.2 |
| Dgcr6   | 10.1 | 10.2 | 8.6  | 10.0 | 7.3  | 10.1 | 8.2  | 10.4 | 8.8  | 8.0  | 9.5  | 9.1  |
| Dgcr8   | 7.2  | 6.6  | 6.1  | 6.8  | 7.0  | 5.9  | 9.3  | 7.6  | 7.8  | 7.6  | 8.5  | 8.0  |
| Dgka    | 3.3  | 4.1  | 4.3  | 3.0  | 2.7  | 3.3  | 3.1  | 4.0  | 3.8  | 3.2  | 3.0  | 3.3  |
| Dgkd    | 6.7  | 5.5  | 4.9  | 8.9  | 13.2 | 5.2  | 6.4  | 6.6  | 7.6  | 7.8  | 7.3  | 6.9  |
| Dgke    | 2.0  | 1.9  | 1.5  | 2.0  | 1.6  | 2.1  | 1.7  | 1.5  | 1.5  | 1.6  | 1.4  | 1.5  |
| Dgkg    | 0.3  | 0.1  | 0.0  | 0.2  | 0.3  | 0.4  | 0.0  | 0.0  | 0.0  | 0.1  | 0.1  | 0.1  |
| Dgkh    | 1.9  | 1.8  | 1.3  | 2.3  | 3.2  | 1.8  | 1.7  | 1.4  | 1.2  | 1.7  | 1.7  | 1.4  |
| Dgki    | 0.0  | 0.0  | 0.0  | 0.1  | 0.0  | 0.1  | 0.0  | 0.0  | 0.0  | 0.0  | 0.0  | 0.0  |
| Dgkq    | 5.1  | 5.1  | 4.2  | 4.8  | 4.5  | 5.1  | 5.0  | 3.9  | 5.2  | 4.3  | 4.2  | 4.6  |
| Dgkz    | 5.9  | 5.9  | 5.2  | 8.2  | 10.3 | 5.5  | 6.9  | 5.4  | 5.6  | 6.6  | 5.7  | 5.0  |
| Dguok   | 21.5 | 22.7 | 18.6 | 19.5 | 18.8 | 22.9 | 17.8 | 17.9 | 17.8 | 17.8 | 19.3 | 17.9 |
| Dhcr24  | 9.8  | 9.1  | 8.4  | 4.0  | 7.7  | 5.2  | 22.6 | 24.1 | 19.6 | 6.6  | 17.5 | 8.3  |
| Dhcr7   | 2.5  | 4.5  | 4.2  | 2.2  | 3.0  | 2.6  | 4.5  | 6.0  | 4.6  | 1.9  | 4.5  | 1.5  |
| Dhdds   | 8.9  | 9.4  | 8.7  | 10.7 | 8.9  | 10.2 | 8.6  | 10.1 | 7.9  | 7.8  | 8.4  | 7.3  |
| Dhdh    | 5.7  | 5.7  | 5.7  | 8.4  | 4.6  | 7.4  | 3.5  | 2.4  | 1.8  | 1.8  | 2.3  | 3.0  |
| Dhfr    | 1.2  | 1.3  | 1.9  | 0.7  | 1.6  | 1.0  | 2.1  | 1.1  | 1.4  | 1.1  | 1.6  | 1.4  |
| Dhh     | 0.0  | 0.1  | 0.1  | 0.0  | 0.0  | 0.0  | 0.1  | 0.0  | 0.1  | 0.0  | 0.0  | 0.0  |
| Dhodh   | 2.4  | 2.0  | 2.1  | 1.7  | 2.2  | 2.3  | 2.1  | 2.4  | 2.2  | 2.4  | 2.4  | 1.8  |
| Dhps    | 13.9 | 12.5 | 9.1  | 12.8 | 9.8  | 14.4 | 11.2 | 10.1 | 11.6 | 10.6 | 11.3 | 12.7 |

Online Table 1

|        |      |      |      |      |      |      |      |      |      |      |      |      |
|--------|------|------|------|------|------|------|------|------|------|------|------|------|
| Dhrs1  | 27.6 | 26.1 | 27.5 | 33.1 | 27.5 | 28.6 | 27.3 | 30.7 | 25.6 | 25.5 | 27.5 | 25.8 |
| Dhrs11 | 2.3  | 2.6  | 2.2  | 2.4  | 2.8  | 2.2  | 2.5  | 2.9  | 2.3  | 2.5  | 1.9  | 1.8  |
| Dhrs13 | 1.9  | 1.5  | 2.0  | 0.8  | 1.2  | 1.8  | 1.9  | 2.0  | 2.0  | 2.4  | 1.1  | 1.5  |
| Dhrs3  | 12.5 | 15.5 | 19.2 | 24.8 | 31.1 | 11.3 | 31.0 | 32.2 | 53.0 | 21.4 | 30.1 | 41.8 |
| Dhrs4  | 11.9 | 12.0 | 13.4 | 13.8 | 12.5 | 10.6 | 14.4 | 15.3 | 13.9 | 17.0 | 17.4 | 16.7 |
| Dhrs7  | 15.1 | 15.8 | 17.9 | 16.6 | 13.8 | 16.2 | 17.2 | 19.8 | 17.6 | 11.9 | 12.7 | 16.4 |
| Dhrs7b | 10.7 | 9.5  | 7.6  | 10.1 | 9.1  | 9.7  | 10.1 | 9.5  | 9.9  | 9.0  | 9.8  | 9.3  |
| Dhrs9  | 0.6  | 0.1  | 0.1  | 0.6  | 0.5  | 0.2  | 0.2  | 0.1  | 0.1  | 0.7  | 0.9  | 0.2  |
| Dhtkd1 | 1.5  | 1.3  | 1.1  | 1.4  | 1.1  | 1.3  | 1.2  | 1.0  | 0.8  | 1.0  | 0.9  | 1.0  |
| Dhx15  | 47.3 | 42.3 | 44.8 | 47.8 | 48.3 | 40.1 | 48.0 | 46.2 | 45.7 | 48.0 | 53.3 | 52.7 |
| Dhx16  | 11.6 | 11.4 | 13.0 | 11.4 | 11.5 | 11.9 | 10.9 | 11.7 | 10.8 | 11.8 | 10.4 | 11.1 |
| Dhx29  | 13.8 | 13.0 | 12.7 | 13.8 | 12.1 | 13.8 | 12.0 | 10.6 | 10.5 | 11.4 | 12.1 | 11.8 |
| Dhx30  | 12.7 | 11.9 | 10.4 | 12.6 | 11.6 | 12.5 | 11.2 | 10.9 | 11.1 | 11.7 | 11.8 | 10.8 |
| Dhx32  | 15.0 | 12.9 | 11.2 | 13.0 | 11.8 | 12.2 | 12.1 | 11.3 | 11.1 | 11.9 | 11.7 | 10.5 |
| Dhx33  | 9.1  | 11.3 | 14.3 | 8.9  | 10.1 | 9.1  | 10.7 | 11.9 | 12.6 | 10.4 | 9.9  | 10.4 |
| Dhx34  | 2.1  | 2.2  | 2.3  | 2.0  | 2.0  | 2.4  | 2.0  | 2.9  | 2.2  | 2.5  | 2.0  | 2.3  |
| Dhx35  | 3.2  | 3.2  | 3.6  | 2.4  | 3.2  | 3.6  | 2.7  | 2.9  | 3.4  | 3.3  | 2.6  | 3.1  |
| Dhx36  | 14.3 | 15.6 | 14.1 | 13.9 | 13.9 | 14.7 | 13.1 | 14.3 | 14.3 | 15.4 | 17.3 | 15.4 |
| Dhx37  | 4.0  | 4.2  | 3.2  | 3.9  | 4.2  | 3.6  | 3.9  | 3.2  | 2.9  | 3.0  | 3.0  | 2.7  |
| Dhx38  | 8.2  | 7.9  | 9.9  | 10.6 | 10.4 | 8.9  | 10.8 | 10.2 | 8.6  | 9.8  | 9.6  | 10.6 |
| Dhx40  | 15.4 | 15.1 | 15.7 | 14.4 | 15.1 | 16.5 | 15.3 | 16.4 | 15.3 | 19.4 | 19.0 | 18.4 |
| Dhx57  | 8.5  | 7.6  | 7.5  | 9.6  | 7.5  | 10.0 | 7.5  | 7.1  | 5.9  | 7.0  | 7.6  | 7.6  |
| Dhx58  | 3.5  | 2.2  | 3.3  | 4.2  | 3.1  | 2.7  | 2.1  | 2.1  | 1.8  | 1.1  | 1.5  | 3.9  |
| Dhx8   | 11.3 | 9.8  | 9.8  | 11.2 | 10.5 | 10.6 | 8.7  | 9.6  | 7.5  | 9.0  | 10.5 | 9.5  |
| Dhx9   | 8.5  | 11.1 | 10.6 | 9.2  | 13.4 | 7.9  | 11.4 | 12.4 | 11.5 | 13.8 | 12.7 | 12.8 |
| Diablo | 16.1 | 14.2 | 14.8 | 15.9 | 13.9 | 16.0 | 16.6 | 17.1 | 14.4 | 14.6 | 15.2 | 16.1 |
| Diap1  | 5.0  | 4.8  | 4.2  | 7.4  | 8.2  | 4.8  | 6.1  | 4.1  | 4.4  | 5.2  | 4.9  | 4.4  |
| Diap2  | 1.8  | 2.0  | 2.2  | 1.4  | 2.3  | 1.4  | 1.8  | 1.6  | 1.6  | 1.8  | 1.7  | 1.8  |
| Diap3  | 4.9  | 7.0  | 9.9  | 2.2  | 8.1  | 2.2  | 10.9 | 4.4  | 8.2  | 4.8  | 7.7  | 6.3  |
| Dicer1 | 4.2  | 4.7  | 4.9  | 3.7  | 4.3  | 3.4  | 4.6  | 4.9  | 4.5  | 4.3  | 4.7  | 4.8  |
| Dido1  | 9.3  | 9.8  | 11.0 | 9.6  | 10.0 | 8.7  | 12.1 | 11.4 | 10.4 | 9.0  | 9.9  | 10.7 |
| Diexf  | 1.7  | 1.6  | 1.4  | 2.2  | 1.9  | 2.1  | 2.0  | 1.9  | 1.4  | 1.8  | 1.7  | 1.8  |
| Dimt1  | 4.7  | 5.0  | 4.5  | 4.4  | 4.3  | 4.2  | 4.5  | 4.6  | 4.5  | 4.9  | 5.1  | 4.0  |
| Dio2   | 0.1  | 0.1  | 0.2  | 0.1  | 0.1  | 0.1  | 0.1  | 0.1  | 0.0  | 0.1  | 0.1  | 0.0  |
| Dio3   | 1.2  | 3.2  | 6.1  | 1.3  | 6.5  | 0.3  | 17.6 | 11.8 | 20.8 | 8.9  | 8.5  | 7.7  |
| Dio3os | 0.4  | 1.8  | 1.6  | 0.2  | 1.5  | 0.3  | 2.7  | 3.1  | 6.2  | 1.9  | 1.8  | 1.7  |
| Dip2a  | 7.7  | 8.4  | 7.5  | 7.2  | 8.3  | 8.1  | 8.4  | 7.8  | 8.6  | 6.6  | 7.5  | 7.6  |
| Dip2b  | 5.0  | 5.0  | 5.0  | 4.3  | 5.0  | 4.3  | 4.8  | 4.5  | 4.7  | 4.3  | 4.6  | 4.5  |
| Dip2c  | 7.3  | 6.3  | 5.5  | 7.5  | 5.6  | 7.1  | 6.0  | 4.7  | 5.8  | 5.7  | 6.4  | 6.2  |
| Diras1 | 0.0  | 0.0  | 0.0  | 0.0  | 0.0  | 0.0  | 0.0  | 0.1  | 0.0  | 0.0  | 0.0  | 0.0  |
| Diras2 | 0.1  | 0.2  | 0.2  | 0.1  | 0.2  | 0.2  | 0.2  | 0.2  | 0.1  | 0.1  | 0.1  | 0.1  |
| Dirc2  | 12.8 | 11.1 | 10.0 | 12.7 | 10.4 | 13.2 | 12.6 | 10.5 | 13.1 | 12.8 | 12.8 | 12.3 |
| Dis3   | 4.8  | 4.3  | 4.9  | 4.7  | 4.5  | 4.5  | 5.1  | 5.0  | 4.2  | 4.3  | 5.1  | 4.7  |
| Dis3l  | 5.4  | 5.3  | 6.0  | 5.8  | 5.9  | 7.0  | 5.1  | 6.4  | 5.3  | 5.4  | 6.3  | 6.3  |
| Dis3l2 | 3.3  | 3.0  | 3.4  | 3.6  | 3.1  | 3.1  | 3.1  | 3.9  | 2.8  | 3.1  | 2.9  | 2.9  |
| Disc1  | 0.1  | 0.2  | 0.2  | 0.3  | 0.5  | 0.1  | 0.5  | 0.1  | 0.4  | 0.1  | 0.2  | 0.1  |
| Disp1  | 14.6 | 16.3 | 12.0 | 13.3 | 12.6 | 19.9 | 16.8 | 14.5 | 14.2 | 15.9 | 18.8 | 13.0 |
| Disp2  | 0.4  | 0.5  | 0.4  | 0.3  | 0.3  | 0.3  | 0.5  | 0.5  | 0.6  | 0.4  | 0.4  | 0.3  |
| Dixdc1 | 1.4  | 2.0  | 3.0  | 1.3  | 1.4  | 2.0  | 1.5  | 2.1  | 1.9  | 1.6  | 1.7  | 2.3  |
| Dkc1   | 5.3  | 5.3  | 5.6  | 6.1  | 5.9  | 4.6  | 5.8  | 6.3  | 5.1  | 5.6  | 7.2  | 4.9  |
| Dkk2   | 0.5  | 0.1  | 0.1  | 0.9  | 0.2  | 0.4  | 0.6  | 0.0  | 0.4  | 0.2  | 0.3  | 0.2  |
| Dkk3   | 25.0 | 21.2 | 19.7 | 25.1 | 17.9 | 17.9 | 15.0 | 7.1  | 10.3 | 25.5 | 21.2 | 22.4 |
| Dkk4   | 0.0  | 0.0  | 0.0  | 0.1  | 0.0  | 0.0  | 0.0  | 0.0  | 0.0  | 0.0  | 0.0  | 0.0  |
| Dkkl1  | 0.1  | 0.0  | 0.2  | 0.1  | 0.1  | 0.1  | 0.0  | 0.0  | 0.2  | 0.1  | 0.0  | 0.0  |
| Dlat   | 14.8 | 13.8 | 12.0 | 15.0 | 11.8 | 13.4 | 13.1 | 12.8 | 12.1 | 12.6 | 14.3 | 13.4 |
| Dlc1   | 33.4 | 37.8 | 26.3 | 35.1 | 26.6 | 28.3 | 31.6 | 18.0 | 22.7 | 27.1 | 28.9 | 21.5 |
| Dld    | 36.6 | 36.9 | 37.9 | 44.6 | 37.2 | 37.4 | 37.1 | 34.5 | 34.4 | 38.2 | 38.8 | 44.8 |

Online Table 1

|          |      |      |      |      |      |      |      |      |      |      |      |      |
|----------|------|------|------|------|------|------|------|------|------|------|------|------|
| Dlec1    | 0.2  | 0.2  | 0.2  | 0.2  | 0.2  | 0.3  | 0.1  | 0.2  | 0.1  | 0.2  | 0.1  | 0.1  |
| Dleu2    | 1.2  | 1.0  | 1.4  | 1.7  | 2.4  | 0.7  | 1.2  | 1.3  | 1.1  | 1.9  | 1.2  | 1.5  |
| Dlg1     | 62.1 | 63.3 | 58.1 | 65.7 | 51.0 | 66.9 | 69.3 | 71.6 | 76.3 | 66.2 | 87.3 | 78.7 |
| Dlg2     | 0.6  | 0.8  | 2.4  | 0.8  | 0.7  | 0.8  | 1.1  | 2.2  | 1.6  | 1.1  | 1.3  | 2.1  |
| Dlg3     | 15.2 | 18.6 | 19.0 | 12.7 | 12.1 | 10.7 | 18.0 | 12.9 | 17.0 | 27.8 | 25.0 | 24.9 |
| Dlg4     | 9.8  | 12.1 | 12.0 | 9.2  | 10.0 | 10.9 | 12.2 | 10.1 | 10.8 | 10.0 | 10.8 | 10.1 |
| Dlg5     | 6.7  | 8.0  | 7.6  | 8.1  | 7.3  | 9.0  | 9.1  | 6.2  | 5.9  | 6.7  | 6.8  | 6.3  |
| Dlgap1   | 0.0  | 0.0  | 0.1  | 0.0  | 0.0  | 0.0  | 0.0  | 0.0  | 0.0  | 0.0  | 0.0  | 0.0  |
| Dlgap2   | 0.0  | 0.0  | 0.0  | 0.0  | 0.0  | 0.0  | 0.0  | 0.0  | 0.0  | 0.0  | 0.0  | 0.0  |
| Dlgap3   | 0.0  | 0.0  | 0.1  | 0.0  | 0.0  | 0.0  | 0.0  | 0.0  | 0.0  | 0.0  | 0.0  | 0.0  |
| Dlgap4   | 7.0  | 6.4  | 6.5  | 7.9  | 7.0  | 6.8  | 7.8  | 5.9  | 6.7  | 6.8  | 6.7  | 5.7  |
| Dlgap5   | 2.5  | 5.3  | 8.0  | 0.8  | 7.3  | 1.0  | 9.6  | 3.3  | 7.4  | 3.1  | 7.3  | 4.9  |
| Dlk1     | 0.0  | 0.0  | 0.0  | 0.0  | 0.0  | 0.0  | 0.1  | 0.0  | 0.0  | 0.0  | 0.1  | 0.0  |
| Dlk2     | 0.0  | 0.2  | 0.1  | 0.0  | 0.1  | 0.0  | 0.3  | 0.1  | 0.1  | 0.3  | 0.2  | 0.1  |
| Dll1     | 0.1  | 0.1  | 0.0  | 0.0  | 0.1  | 0.0  | 0.0  | 0.1  | 0.1  | 0.0  | 0.0  | 0.0  |
| Dll4     | 0.1  | 0.1  | 0.3  | 0.1  | 0.0  | 0.0  | 0.3  | 0.4  | 0.3  | 0.0  | 0.0  | 0.1  |
| Dlst     | 32.5 | 29.9 | 29.3 | 30.0 | 30.7 | 27.6 | 35.1 | 33.3 | 33.3 | 29.5 | 36.8 | 31.7 |
| Dlx2     | 0.3  | 0.2  | 0.1  | 0.2  | 0.1  | 0.3  | 0.2  | 0.2  | 0.1  | 0.2  | 0.2  | 0.1  |
| Dlx4     | 0.4  | 0.3  | 0.2  | 0.4  | 0.3  | 0.3  | 0.3  | 0.2  | 0.2  | 0.5  | 0.2  | 0.3  |
| Dlx5     | 0.0  | 0.0  | 0.0  | 0.0  | 0.0  | 0.0  | 0.0  | 0.0  | 0.0  | 0.0  | 0.1  | 0.1  |
| Dlx6as1  | 0.0  | 0.0  | 0.0  | 0.0  | 0.0  | 0.0  | 0.0  | 0.0  | 0.0  | 0.0  | 0.0  | 0.0  |
| Dmap1    | 7.5  | 8.6  | 8.4  | 6.9  | 6.8  | 9.7  | 8.0  | 6.8  | 8.0  | 8.2  | 7.1  | 7.7  |
| Dmc1     | 0.0  | 0.0  | 0.0  | 0.0  | 0.1  | 0.0  | 0.1  | 0.0  | 0.0  | 0.0  | 0.0  | 0.1  |
| Dmd      | 1.8  | 2.0  | 2.3  | 2.0  | 1.9  | 2.0  | 1.9  | 1.7  | 1.9  | 1.2  | 2.0  | 1.8  |
| Dmkn     | 0.0  | 0.0  | 0.1  | 0.0  | 0.0  | 0.1  | 0.2  | 0.1  | 0.1  | 0.4  | 0.9  | 0.1  |
| Dmp1     | 0.1  | 0.0  | 0.0  | 0.0  | 0.0  | 0.0  | 0.0  | 0.0  | 0.0  | 0.0  | 0.0  | 0.0  |
| Dmpk     | 28.1 | 16.7 | 15.7 | 39.0 | 19.4 | 27.8 | 27.5 | 16.1 | 23.4 | 19.9 | 27.0 | 21.9 |
| Dmrt2    | 0.8  | 0.4  | 0.4  | 1.1  | 0.5  | 0.6  | 0.5  | 0.2  | 0.2  | 0.1  | 0.4  | 0.2  |
| Dmrta2   | 0.6  | 0.6  | 0.6  | 0.4  | 0.6  | 0.5  | 0.9  | 0.7  | 0.8  | 0.7  | 0.6  | 0.6  |
| Dmrta1a  | 0.8  | 0.7  | 1.0  | 0.4  | 0.3  | 1.1  | 0.4  | 0.3  | 0.3  | 0.5  | 0.6  | 0.8  |
| Dmrta1c1 | 0.0  | 0.0  | 0.0  | 0.0  | 0.0  | 0.0  | 0.0  | 0.0  | 0.0  | 0.0  | 0.0  | 0.0  |
| Dmrta1c2 | 0.0  | 0.0  | 0.0  | 0.0  | 0.1  | 0.0  | 0.0  | 0.0  | 0.0  | 0.0  | 0.0  | 0.0  |
| Dmif1    | 12.8 | 13.7 | 14.7 | 12.4 | 11.9 | 13.1 | 13.9 | 14.5 | 14.1 | 14.4 | 16.1 | 16.4 |
| Dmwd     | 13.4 | 15.0 | 12.2 | 13.7 | 11.4 | 16.0 | 13.1 | 11.6 | 14.0 | 11.7 | 12.0 | 11.3 |
| Dmxl1    | 6.2  | 7.0  | 6.2  | 5.8  | 6.4  | 6.2  | 5.3  | 5.8  | 6.2  | 7.1  | 7.7  | 6.9  |
| Dmxl2    | 2.1  | 1.9  | 1.5  | 2.5  | 1.8  | 2.5  | 1.5  | 1.3  | 1.4  | 1.4  | 1.5  | 1.7  |
| Dna2     | 0.2  | 0.3  | 0.3  | 0.2  | 0.6  | 0.1  | 0.5  | 0.3  | 0.3  | 0.2  | 0.4  | 0.3  |
| Dnaaf1   | 0.0  | 0.0  | 0.0  | 0.0  | 0.0  | 0.0  | 0.0  | 0.0  | 0.0  | 0.0  | 0.0  | 0.0  |
| Dnaaf2   | 1.5  | 2.0  | 2.0  | 1.3  | 2.1  | 1.6  | 2.2  | 1.6  | 1.9  | 1.9  | 1.8  | 1.5  |
| Dnaaf3   | 0.3  | 0.5  | 0.5  | 0.5  | 0.3  | 0.4  | 0.4  | 0.5  | 0.7  | 0.4  | 0.4  | 0.5  |
| Dnahc1   | 0.0  | 0.0  | 0.0  | 0.0  | 0.0  | 0.0  | 0.0  | 0.0  | 0.0  | 0.0  | 0.0  | 0.0  |
| Dnahc10  | 0.2  | 0.1  | 0.1  | 0.1  | 0.1  | 0.1  | 0.1  | 0.1  | 0.1  | 0.1  | 0.1  | 0.1  |
| Dnahc11  | 0.0  | 0.0  | 0.1  | 0.1  | 0.1  | 0.0  | 0.1  | 0.0  | 0.0  | 0.0  | 0.1  | 0.0  |
| Dnahc17  | 0.0  | 0.1  | 0.0  | 0.0  | 0.0  | 0.0  | 0.0  | 0.0  | 0.0  | 0.0  | 0.0  | 0.1  |
| Dnahc2   | 0.0  | 0.0  | 0.0  | 0.0  | 0.0  | 0.0  | 0.0  | 0.0  | 0.0  | 0.0  | 0.0  | 0.0  |
| Dnahc5   | 0.0  | 0.0  | 0.0  | 0.0  | 0.0  | 0.0  | 0.0  | 0.0  | 0.0  | 0.0  | 0.0  | 0.0  |
| Dnahc6   | 0.0  | 0.0  | 0.0  | 0.0  | 0.0  | 0.0  | 0.0  | 0.0  | 0.0  | 0.0  | 0.0  | 0.0  |
| Dnahc7a  | 0.1  | 0.1  | 0.1  | 0.1  | 0.0  | 0.1  | 0.1  | 0.0  | 0.0  | 0.0  | 0.0  | 0.0  |
| Dnahc7b  | 0.4  | 0.3  | 0.4  | 0.1  | 0.2  | 0.3  | 0.2  | 0.3  | 0.1  | 0.2  | 0.2  | 0.2  |
| Dnahc8   | 0.4  | 0.4  | 0.4  | 0.3  | 0.2  | 0.3  | 0.1  | 0.1  | 0.1  | 0.3  | 0.3  | 0.2  |
| Dnahc9   | 0.0  | 0.0  | 0.1  | 0.0  | 0.0  | 0.0  | 0.0  | 0.1  | 0.0  | 0.0  | 0.0  | 0.1  |
| Dnaic1   | 0.1  | 0.1  | 0.1  | 0.3  | 0.0  | 0.1  | 0.0  | 0.0  | 0.0  | 0.0  | 0.0  | 0.0  |
| Dnaic2   | 2.2  | 2.0  | 1.7  | 2.5  | 1.4  | 1.9  | 1.1  | 0.7  | 0.7  | 0.6  | 1.0  | 1.2  |
| Dnaja1   | 40.0 | 43.3 | 45.5 | 37.3 | 34.0 | 30.8 | 36.5 | 35.2 | 40.1 | 48.8 | 49.4 | 55.5 |
| Dnaja2   | 67.1 | 63.0 | 66.1 | 73.8 | 57.4 | 66.0 | 57.9 | 58.9 | 52.0 | 64.5 | 70.3 | 66.9 |
| Dnaja3   | 19.1 | 18.7 | 16.8 | 19.8 | 16.0 | 21.2 | 15.9 | 17.4 | 16.5 | 15.6 | 17.7 | 15.5 |
| Dnaja4   | 8.3  | 8.6  | 7.3  | 8.9  | 6.9  | 9.1  | 7.6  | 5.8  | 7.9  | 8.7  | 8.4  | 9.2  |

Online Table 1

|          |      |      |       |       |      |       |      |      |      |      |      |       |
|----------|------|------|-------|-------|------|-------|------|------|------|------|------|-------|
| Dnajib1  | 28.2 | 32.0 | 22.4  | 27.4  | 28.4 | 24.1  | 30.5 | 18.2 | 25.0 | 35.1 | 30.2 | 25.3  |
| Dnajib11 | 85.7 | 70.9 | 66.8  | 91.9  | 75.0 | 70.2  | 83.4 | 78.2 | 70.8 | 72.8 | 81.1 | 82.4  |
| Dnajib12 | 17.7 | 18.8 | 19.6  | 17.0  | 17.9 | 16.6  | 23.0 | 21.0 | 19.2 | 18.8 | 21.4 | 21.8  |
| Dnajib13 | 0.6  | 0.6  | 0.3   | 0.3   | 0.2  | 0.3   | 0.2  | 0.1  | 0.2  | 0.1  | 0.1  | 0.1   |
| Dnajib14 | 10.0 | 10.8 | 9.7   | 10.0  | 9.1  | 11.2  | 10.4 | 8.5  | 8.9  | 10.6 | 10.1 | 11.5  |
| Dnajib2  | 19.2 | 24.4 | 22.6  | 20.0  | 17.8 | 22.7  | 21.8 | 18.3 | 21.8 | 17.5 | 19.6 | 20.6  |
| Dnajib3  | 0.9  | 1.3  | 1.4   | 1.5   | 1.5  | 1.1   | 1.4  | 1.2  | 1.5  | 1.0  | 1.4  | 2.2   |
| Dnajib4  | 32.0 | 33.6 | 30.0  | 34.8  | 27.9 | 31.4  | 21.3 | 18.4 | 21.4 | 27.4 | 29.0 | 29.4  |
| Dnajib5  | 3.6  | 3.2  | 4.8   | 3.0   | 3.8  | 2.8   | 4.3  | 3.9  | 3.7  | 2.7  | 4.2  | 3.4   |
| Dnajib6  | 79.3 | 89.5 | 101.6 | 85.6  | 81.7 | 80.8  | 87.6 | 94.1 | 91.3 | 90.5 | 96.7 | 119.4 |
| Dnajib7  | 0.0  | 0.1  | 0.0   | 0.2   | 0.1  | 0.0   | 0.0  | 0.0  | 0.1  | 0.0  | 0.0  | 0.1   |
| Dnajib9  | 15.0 | 13.8 | 14.6  | 22.9  | 17.4 | 15.4  | 17.1 | 16.4 | 17.6 | 22.6 | 22.3 | 23.3  |
| Dnajc1   | 18.5 | 19.5 | 22.6  | 18.8  | 15.8 | 17.6  | 19.4 | 19.0 | 17.8 | 18.7 | 20.2 | 23.1  |
| Dnajc10  | 70.6 | 67.4 | 60.1  | 78.7  | 76.9 | 78.6  | 61.7 | 58.9 | 54.7 | 61.7 | 63.2 | 59.5  |
| Dnajc11  | 13.7 | 10.1 | 10.2  | 14.8  | 11.5 | 13.7  | 12.4 | 12.6 | 10.7 | 12.6 | 13.4 | 11.6  |
| Dnajc12  | 1.8  | 1.8  | 1.3   | 2.5   | 2.0  | 2.6   | 1.5  | 1.1  | 1.6  | 2.3  | 1.6  | 1.3   |
| Dnajc13  | 12.4 | 11.5 | 12.1  | 11.7  | 12.8 | 12.5  | 11.7 | 12.8 | 11.1 | 12.0 | 12.1 | 13.3  |
| Dnajc14  | 14.0 | 12.7 | 13.2  | 15.4  | 13.7 | 13.3  | 14.2 | 13.7 | 13.4 | 13.8 | 14.7 | 15.6  |
| Dnajc15  | 25.5 | 17.5 | 18.8  | 26.2  | 22.0 | 22.8  | 16.9 | 19.5 | 14.6 | 17.3 | 17.4 | 18.7  |
| Dnajc16  | 3.7  | 4.1  | 4.1   | 3.1   | 4.0  | 3.8   | 4.3  | 3.6  | 4.1  | 3.3  | 4.0  | 3.5   |
| Dnajc17  | 6.5  | 4.3  | 4.7   | 8.9   | 4.7  | 5.9   | 5.7  | 4.7  | 3.7  | 4.3  | 4.8  | 5.8   |
| Dnajc18  | 13.7 | 13.2 | 12.2  | 14.8  | 12.2 | 14.7  | 12.9 | 13.2 | 12.9 | 13.6 | 14.3 | 14.4  |
| Dnajc19  | 26.2 | 21.8 | 23.1  | 28.7  | 24.4 | 28.4  | 24.5 | 27.2 | 25.0 | 21.9 | 23.8 | 22.5  |
| Dnajc2   | 23.6 | 19.0 | 19.2  | 26.5  | 17.3 | 20.9  | 22.3 | 18.5 | 14.4 | 17.3 | 25.1 | 22.3  |
| Dnajc21  | 12.2 | 11.2 | 12.8  | 11.9  | 9.2  | 10.5  | 10.6 | 11.0 | 10.9 | 10.0 | 14.1 | 13.4  |
| Dnajc24  | 6.4  | 7.2  | 6.2   | 6.9   | 5.6  | 7.6   | 5.1  | 5.8  | 6.1  | 5.8  | 5.1  | 5.4   |
| Dnajc25  | 11.1 | 9.0  | 11.3  | 12.9  | 8.7  | 10.8  | 14.2 | 14.0 | 11.9 | 11.0 | 12.6 | 13.6  |
| Dnajc27  | 2.4  | 2.2  | 2.0   | 2.2   | 1.6  | 2.2   | 1.9  | 1.7  | 1.8  | 1.7  | 1.8  | 1.7   |
| Dnajc28  | 2.3  | 2.3  | 2.2   | 2.7   | 1.4  | 2.6   | 1.5  | 1.6  | 1.5  | 1.7  | 1.5  | 2.4   |
| Dnajc3   | 54.1 | 49.8 | 53.1  | 64.0  | 51.2 | 48.2  | 61.5 | 56.7 | 57.3 | 59.5 | 62.9 | 71.1  |
| Dnajc30  | 9.2  | 9.1  | 8.1   | 9.4   | 7.9  | 8.9   | 9.3  | 9.1  | 8.8  | 9.2  | 8.9  | 7.7   |
| Dnajc4   | 7.8  | 8.0  | 11.1  | 11.5  | 7.8  | 10.0  | 11.6 | 10.5 | 9.9  | 9.4  | 11.0 | 8.7   |
| Dnajc5   | 23.6 | 22.6 | 18.7  | 22.8  | 23.3 | 22.7  | 22.2 | 21.4 | 21.4 | 22.7 | 23.0 | 21.8  |
| Dnajc5b  | 0.0  | 0.2  | 0.0   | 0.0   | 0.0  | 0.0   | 0.0  | 0.2  | 0.0  | 0.0  | 0.0  | 0.0   |
| Dnajc6   | 0.2  | 0.2  | 0.1   | 0.2   | 0.2  | 0.3   | 0.0  | 0.1  | 0.1  | 0.2  | 0.2  | 0.1   |
| Dnajc7   | 20.4 | 20.1 | 19.8  | 23.5  | 20.3 | 20.1  | 21.2 | 20.5 | 18.9 | 19.6 | 22.2 | 23.2  |
| Dnajc8   | 94.8 | 89.0 | 108.7 | 124.4 | 75.3 | 105.1 | 99.7 | 86.7 | 60.7 | 73.4 | 96.8 | 102.0 |
| Dnajc9   | 16.3 | 19.2 | 24.1  | 11.9  | 23.2 | 14.4  | 21.3 | 13.6 | 16.6 | 16.9 | 20.7 | 17.9  |
| Dnalc1   | 5.0  | 4.8  | 4.7   | 5.5   | 4.7  | 5.8   | 4.4  | 3.3  | 4.1  | 4.9  | 5.1  | 4.7   |
| Dnalc4   | 8.4  | 8.1  | 8.0   | 10.1  | 8.0  | 10.9  | 8.4  | 8.9  | 8.4  | 8.8  | 9.0  | 8.8   |
| Dnali1   | 0.2  | 0.2  | 0.3   | 0.3   | 0.1  | 0.2   | 0.1  | 0.1  | 0.1  | 0.3  | 0.2  | 0.2   |
| Dnase1   | 0.1  | 0.1  | 0.1   | 0.1   | 0.1  | 0.0   | 0.1  | 0.2  | 0.1  | 0.2  | 0.0  | 0.1   |
| Dnase1l1 | 4.9  | 4.3  | 5.7   | 10.6  | 11.0 | 8.5   | 6.0  | 5.9  | 6.6  | 5.1  | 6.2  | 6.0   |
| Dnase1l2 | 0.3  | 0.6  | 0.5   | 0.2   | 0.5  | 0.3   | 0.5  | 0.5  | 0.9  | 0.3  | 0.4  | 0.8   |
| Dnase2a  | 8.8  | 7.7  | 8.6   | 13.1  | 13.3 | 10.2  | 6.9  | 8.9  | 7.0  | 7.7  | 6.5  | 9.6   |
| Dnd1     | 0.3  | 0.4  | 0.5   | 0.4   | 0.5  | 0.4   | 0.3  | 0.5  | 0.5  | 0.4  | 0.2  | 0.7   |
| Dner     | 0.1  | 0.1  | 0.1   | 0.2   | 0.1  | 0.1   | 0.1  | 0.1  | 0.1  | 0.1  | 0.1  | 0.0   |
| Dnlz     | 9.2  | 6.7  | 6.1   | 9.3   | 7.0  | 9.3   | 7.2  | 8.4  | 7.6  | 8.9  | 8.2  | 7.2   |
| Dnm1     | 0.4  | 0.6  | 1.3   | 0.2   | 0.4  | 0.9   | 0.4  | 1.3  | 0.4  | 0.7  | 0.8  | 0.7   |
| Dnm1l    | 24.6 | 25.7 | 25.7  | 27.2  | 25.6 | 26.5  | 26.3 | 26.3 | 26.6 | 27.3 | 30.6 | 29.5  |
| Dnm2     | 36.1 | 35.7 | 36.7  | 41.0  | 37.6 | 36.7  | 41.9 | 43.3 | 39.8 | 33.6 | 40.8 | 39.6  |
| Dnm3     | 0.3  | 0.4  | 0.4   | 0.4   | 0.2  | 0.3   | 0.2  | 0.3  | 0.2  | 0.2  | 0.2  | 0.2   |
| Dnm3os   | 1.6  | 2.7  | 4.8   | 2.2   | 3.4  | 1.8   | 2.9  | 5.3  | 5.3  | 3.4  | 3.5  | 5.0   |
| Dnmbp    | 3.2  | 3.6  | 3.9   | 3.3   | 3.3  | 3.8   | 3.6  | 3.6  | 3.7  | 3.3  | 3.6  | 4.0   |
| Dnmt1    | 7.1  | 9.3  | 13.1  | 7.2   | 12.5 | 5.9   | 14.4 | 10.6 | 10.3 | 7.9  | 10.7 | 8.4   |
| Dnmt3a   | 2.9  | 3.5  | 3.5   | 2.6   | 3.5  | 2.2   | 2.7  | 3.1  | 2.9  | 3.1  | 2.6  | 2.9   |
| Dnmt3b   | 0.2  | 0.1  | 0.2   | 0.1   | 0.2  | 0.2   | 0.1  | 0.4  | 0.2  | 0.2  | 0.2  | 0.3   |

Online Table 1

|         |      |      |      |      |      |      |      |      |      |      |      |      |
|---------|------|------|------|------|------|------|------|------|------|------|------|------|
| Dnmt3l  | 3.8  | 4.0  | 3.2  | 3.9  | 4.4  | 3.5  | 4.0  | 3.2  | 2.2  | 1.5  | 1.4  | 2.3  |
| Dnpep   | 64.3 | 77.1 | 83.3 | 59.0 | 66.2 | 52.5 | 78.7 | 80.2 | 90.4 | 63.4 | 67.1 | 78.7 |
| Dnph1   | 1.9  | 1.6  | 0.9  | 1.4  | 1.5  | 1.4  | 1.0  | 1.2  | 1.1  | 1.4  | 2.1  | 1.5  |
| Dntt    | 0.1  | 0.1  | 0.0  | 0.0  | 0.0  | 0.0  | 0.1  | 0.1  | 0.1  | 0.0  | 0.0  | 0.0  |
| Dnttip1 | 7.3  | 8.2  | 9.7  | 8.4  | 8.4  | 9.4  | 9.8  | 9.6  | 9.8  | 9.3  | 9.3  | 10.0 |
| Dnttip2 | 25.4 | 24.5 | 24.0 | 24.9 | 21.3 | 22.9 | 21.4 | 22.6 | 21.3 | 21.9 | 26.9 | 27.2 |
| Doc2a   | 0.5  | 0.8  | 0.6  | 0.7  | 0.7  | 0.6  | 0.7  | 0.5  | 0.5  | 0.5  | 0.4  | 0.5  |
| Doc2b   | 0.0  | 0.1  | 0.0  | 0.0  | 0.0  | 0.2  | 0.0  | 0.1  | 0.1  | 0.0  | 0.1  | 0.1  |
| Doc2g   | 0.4  | 0.7  | 0.5  | 0.5  | 0.5  | 0.8  | 0.5  | 0.5  | 0.9  | 0.8  | 0.3  | 0.5  |
| Dock1   | 19.1 | 18.2 | 18.5 | 18.7 | 16.7 | 21.4 | 18.6 | 17.0 | 16.7 | 15.7 | 17.2 | 17.1 |
| Dock10  | 0.6  | 0.3  | 0.6  | 2.6  | 4.6  | 0.1  | 1.0  | 0.8  | 0.5  | 0.6  | 0.4  | 0.7  |
| Dock11  | 3.7  | 3.2  | 2.8  | 4.6  | 4.3  | 4.1  | 2.6  | 2.1  | 2.3  | 2.5  | 2.6  | 2.4  |
| Dock2   | 0.5  | 0.0  | 0.1  | 5.3  | 9.0  | 0.0  | 1.1  | 0.2  | 0.1  | 0.4  | 0.1  | 0.4  |
| Dock3   | 0.1  | 0.1  | 0.1  | 0.1  | 0.1  | 0.1  | 0.1  | 0.1  | 0.0  | 0.1  | 0.1  | 0.0  |
| Dock4   | 1.8  | 2.1  | 2.0  | 2.4  | 3.9  | 1.7  | 1.5  | 1.1  | 1.1  | 1.9  | 1.5  | 1.1  |
| Dock5   | 3.9  | 2.4  | 1.6  | 4.2  | 4.0  | 3.4  | 4.0  | 1.8  | 1.9  | 5.9  | 4.0  | 3.3  |
| Dock6   | 1.4  | 1.7  | 1.5  | 1.2  | 1.3  | 1.4  | 1.6  | 1.5  | 1.6  | 1.1  | 1.2  | 1.1  |
| Dock7   | 20.7 | 21.5 | 21.2 | 17.6 | 20.1 | 17.9 | 21.1 | 20.2 | 21.1 | 19.9 | 23.1 | 20.1 |
| Dock8   | 0.6  | 0.1  | 0.1  | 4.2  | 7.3  | 0.1  | 0.7  | 0.2  | 0.2  | 1.3  | 0.6  | 0.5  |
| Dock9   | 2.6  | 2.0  | 2.0  | 2.2  | 1.8  | 2.5  | 1.8  | 2.2  | 1.6  | 2.7  | 2.4  | 1.9  |
| Dohh    | 18.2 | 14.8 | 14.9 | 20.4 | 16.6 | 20.3 | 18.1 | 13.8 | 16.8 | 18.6 | 15.5 | 14.3 |
| Dok1    | 16.3 | 15.6 | 14.4 | 17.7 | 21.8 | 16.3 | 22.2 | 14.8 | 25.1 | 26.2 | 20.2 | 22.6 |
| Dok2    | 0.3  | 0.2  | 0.0  | 1.7  | 4.8  | 0.1  | 0.5  | 0.2  | 0.2  | 0.3  | 0.1  | 0.4  |
| Dok3    | 0.9  | 0.3  | 0.1  | 3.0  | 6.9  | 0.2  | 1.5  | 0.2  | 0.4  | 0.4  | 0.4  | 0.5  |
| Dok4    | 4.0  | 4.0  | 3.9  | 5.0  | 4.1  | 4.4  | 4.9  | 5.4  | 5.9  | 4.7  | 4.1  | 4.5  |
| Dok5    | 3.5  | 3.1  | 2.3  | 3.0  | 3.3  | 3.2  | 3.2  | 3.1  | 2.5  | 3.1  | 3.8  | 3.6  |
| Dok6    | 0.5  | 0.9  | 0.7  | 1.1  | 1.2  | 0.8  | 1.5  | 1.6  | 1.5  | 1.1  | 1.8  | 1.1  |
| Dok7    | 0.0  | 0.0  | 0.1  | 0.0  | 0.0  | 0.0  | 0.0  | 0.0  | 0.0  | 0.0  | 0.1  | 0.0  |
| Dolk    | 9.2  | 9.5  | 6.8  | 10.4 | 9.1  | 9.2  | 9.0  | 7.8  | 8.4  | 8.8  | 7.9  | 9.2  |
| Dolpp1  | 3.3  | 4.5  | 4.2  | 3.8  | 4.3  | 3.2  | 4.6  | 5.4  | 5.5  | 4.0  | 4.8  | 3.8  |
| Dom3z   | 5.7  | 6.1  | 5.2  | 5.2  | 5.8  | 4.6  | 6.5  | 5.6  | 5.6  | 5.6  | 6.6  | 5.3  |
| Donson  | 2.9  | 4.4  | 5.0  | 2.5  | 4.9  | 2.3  | 5.5  | 4.3  | 5.2  | 3.5  | 4.9  | 4.4  |
| Dopey1  | 4.0  | 4.2  | 3.8  | 3.2  | 3.4  | 3.5  | 3.2  | 3.3  | 3.8  | 3.7  | 3.8  | 3.5  |
| Dopey2  | 3.8  | 4.6  | 4.1  | 5.0  | 4.3  | 4.0  | 4.3  | 4.3  | 4.2  | 2.9  | 4.0  | 3.3  |
| Dos     | 2.9  | 2.7  | 2.7  | 3.9  | 2.8  | 4.5  | 3.2  | 2.2  | 2.8  | 3.4  | 3.2  | 2.9  |
| Dot1l   | 0.6  | 1.0  | 0.9  | 0.6  | 1.6  | 0.7  | 1.1  | 1.0  | 1.1  | 1.1  | 0.9  | 0.7  |
| Dpagt1  | 13.2 | 12.8 | 11.0 | 14.3 | 12.2 | 14.7 | 15.4 | 14.4 | 12.2 | 12.5 | 13.3 | 11.3 |
| Dpcd    | 11.7 | 10.0 | 9.3  | 13.0 | 9.3  | 12.1 | 9.3  | 9.2  | 8.0  | 9.1  | 9.5  | 9.9  |
| Dpcr1   | 0.3  | 0.2  | 0.3  | 0.1  | 0.1  | 0.1  | 0.1  | 0.1  | 0.1  | 0.2  | 0.4  | 0.2  |
| Dpep1   | 10.9 | 25.5 | 57.9 | 19.2 | 28.5 | 10.2 | 20.7 | 51.2 | 29.1 | 13.0 | 9.3  | 18.8 |
| Dpep2   | 0.5  | 0.3  | 0.3  | 4.7  | 6.9  | 0.2  | 0.8  | 0.2  | 0.3  | 0.4  | 0.1  | 0.4  |
| Dpf1    | 0.8  | 1.2  | 1.5  | 1.0  | 0.6  | 1.4  | 1.1  | 0.6  | 0.7  | 0.8  | 0.9  | 0.7  |
| Dpf2    | 9.8  | 12.2 | 10.7 | 9.8  | 9.5  | 10.8 | 10.2 | 12.8 | 10.3 | 10.8 | 10.0 | 9.6  |
| Dpf3    | 0.0  | 0.0  | 0.0  | 0.0  | 0.0  | 0.0  | 0.1  | 0.1  | 0.0  | 0.1  | 0.0  | 0.0  |
| Dph1    | 3.4  | 2.6  | 2.2  | 3.2  | 3.6  | 3.4  | 3.0  | 3.4  | 3.3  | 3.6  | 2.6  | 2.7  |
| Dph2    | 2.9  | 2.4  | 1.6  | 3.3  | 2.8  | 2.1  | 2.8  | 2.4  | 2.6  | 2.4  | 2.0  | 1.9  |
| Dph3    | 7.4  | 5.0  | 4.2  | 5.7  | 5.7  | 5.3  | 6.4  | 6.7  | 5.7  | 7.5  | 6.5  | 5.8  |
| Dph5    | 5.9  | 4.4  | 4.3  | 6.4  | 5.2  | 5.0  | 5.0  | 5.3  | 4.4  | 5.4  | 6.2  | 4.7  |
| Dpm1    | 16.7 | 18.5 | 19.6 | 15.3 | 15.3 | 18.8 | 12.9 | 13.3 | 13.6 | 17.6 | 15.1 | 18.1 |
| Dpm2    | 31.1 | 25.8 | 22.1 | 30.3 | 28.6 | 24.6 | 31.5 | 27.1 | 28.6 | 29.8 | 25.2 | 27.0 |
| Dpm3    | 46.3 | 46.4 | 36.7 | 36.2 | 40.7 | 42.4 | 42.0 | 41.0 | 45.9 | 51.2 | 43.9 | 40.2 |
| Dpp10   | 0.0  | 0.0  | 0.0  | 0.0  | 0.0  | 0.0  | 0.0  | 0.0  | 0.0  | 0.0  | 0.0  | 0.0  |
| Dpp3    | 21.1 | 18.1 | 16.4 | 21.4 | 21.1 | 20.5 | 20.2 | 20.3 | 19.5 | 20.4 | 18.9 | 19.3 |
| Dpp4    | 1.6  | 2.6  | 2.2  | 0.5  | 0.4  | 0.3  | 0.3  | 0.8  | 1.3  | 3.0  | 2.4  | 1.0  |
| Dpp7    | 45.4 | 34.6 | 30.7 | 45.1 | 40.5 | 54.0 | 22.5 | 27.4 | 27.6 | 30.8 | 26.3 | 32.3 |
| Dpp8    | 42.9 | 39.3 | 37.7 | 48.5 | 39.3 | 49.7 | 38.3 | 35.9 | 35.8 | 38.8 | 44.0 | 42.7 |
| Dpp9    | 10.9 | 11.0 | 10.0 | 12.6 | 13.4 | 11.1 | 14.3 | 12.4 | 12.9 | 11.5 | 11.9 | 10.8 |

Online Table 1

|         |       |       |       |       |       |       |       |       |       |       |       |       |
|---------|-------|-------|-------|-------|-------|-------|-------|-------|-------|-------|-------|-------|
| Dppa2   | 0.1   | 0.0   | 0.0   | 0.3   | 0.0   | 0.1   | 0.0   | 0.0   | 0.0   | 0.1   | 0.2   | 0.0   |
| Dpt     | 22.9  | 47.1  | 124.1 | 5.6   | 16.0  | 2.4   | 12.3  | 50.6  | 21.9  | 11.2  | 6.4   | 25.2  |
| Dpy1911 | 22.1  | 20.4  | 19.2  | 26.6  | 23.8  | 25.6  | 26.9  | 25.5  | 28.8  | 20.1  | 24.9  | 25.1  |
| Dpy1912 | 0.0   | 0.0   | 0.0   | 0.0   | 0.1   | 0.0   | 0.0   | 0.0   | 0.0   | 0.0   | 0.0   | 0.0   |
| Dpy1913 | 2.4   | 2.7   | 2.7   | 2.2   | 2.2   | 2.5   | 3.0   | 2.8   | 2.7   | 3.1   | 2.7   | 2.6   |
| Dpy1914 | 9.8   | 9.8   | 9.3   | 8.1   | 10.5  | 12.0  | 8.9   | 10.5  | 10.4  | 9.8   | 10.7  | 9.8   |
| Dpy30   | 24.7  | 19.7  | 20.7  | 24.0  | 19.4  | 28.0  | 21.2  | 20.3  | 16.3  | 17.4  | 24.1  | 18.5  |
| Dpyd    | 0.9   | 0.8   | 0.8   | 0.7   | 0.6   | 0.8   | 0.5   | 0.5   | 0.2   | 0.3   | 0.4   | 0.7   |
| Dpysl2  | 128.5 | 153.5 | 140.8 | 107.0 | 127.7 | 111.3 | 150.0 | 153.8 | 137.6 | 107.9 | 138.2 | 126.3 |
| Dpysl3  | 23.6  | 17.1  | 22.8  | 18.7  | 17.5  | 28.2  | 20.0  | 26.7  | 19.6  | 22.2  | 25.6  | 24.5  |
| Dpysl4  | 0.7   | 0.2   | 0.4   | 0.4   | 0.2   | 0.7   | 0.2   | 0.2   | 0.3   | 0.3   | 0.2   | 0.3   |
| Dpysl5  | 0.1   | 0.1   | 0.1   | 0.1   | 0.1   | 0.1   | 0.1   | 0.1   | 0.1   | 0.3   | 0.1   | 0.1   |
| Dqx1    | 0.3   | 0.3   | 0.2   | 0.4   | 0.2   | 0.5   | 0.2   | 0.2   | 0.3   | 0.2   | 0.2   | 0.1   |
| Dr1     | 8.9   | 8.4   | 11.3  | 10.9  | 10.7  | 10.0  | 9.7   | 10.1  | 9.7   | 10.1  | 11.5  | 10.1  |
| Dram1   | 9.6   | 13.8  | 23.2  | 10.2  | 20.1  | 7.9   | 16.0  | 16.7  | 12.4  | 10.1  | 10.0  | 14.2  |
| Dram2   | 7.6   | 7.7   | 9.1   | 9.1   | 9.6   | 8.7   | 6.9   | 8.2   | 9.1   | 10.2  | 10.7  | 10.1  |
| Drap1   | 82.2  | 67.8  | 67.1  | 106.1 | 69.9  | 101.3 | 84.8  | 71.4  | 66.2  | 75.7  | 80.2  | 81.3  |
| Draxin  | 0.0   | 0.0   | 0.0   | 0.0   | 0.0   | 0.0   | 0.0   | 0.0   | 0.0   | 0.0   | 0.1   | 0.0   |
| Drd1a   | 0.0   | 0.0   | 0.0   | 0.1   | 0.0   | 0.0   | 0.0   | 0.0   | 0.0   | 0.0   | 0.0   | 0.0   |
| Drd3    | 0.0   | 0.0   | 0.1   | 0.0   | 0.0   | 0.0   | 0.0   | 0.0   | 0.0   | 0.0   | 0.0   | 0.0   |
| Drd4    | 0.0   | 0.0   | 0.0   | 0.1   | 0.0   | 0.0   | 0.2   | 0.0   | 0.1   | 0.3   | 0.0   | 0.1   |
| Drg1    | 44.2  | 42.6  | 34.9  | 40.4  | 37.6  | 37.7  | 36.2  | 35.7  | 37.6  | 41.2  | 36.1  | 37.7  |
| Drg2    | 25.7  | 24.3  | 20.3  | 29.0  | 19.8  | 25.3  | 22.0  | 21.1  | 19.3  | 24.4  | 22.9  | 19.0  |
| Drosha  | 5.4   | 5.2   | 5.5   | 6.4   | 4.2   | 5.4   | 5.1   | 5.7   | 4.1   | 4.6   | 5.3   | 4.8   |
| Drp2    | 1.3   | 1.9   | 2.1   | 0.9   | 1.1   | 1.2   | 1.0   | 1.3   | 0.9   | 0.8   | 0.8   | 1.1   |
| Dsc2    | 0.1   | 0.0   | 0.0   | 0.0   | 0.1   | 0.1   | 0.0   | 0.0   | 0.0   | 0.0   | 0.0   | 0.0   |
| Dsc3    | 0.0   | 0.0   | 0.0   | 0.0   | 0.0   | 0.0   | 0.0   | 0.0   | 0.0   | 0.0   | 0.0   | 0.0   |
| Dscam   | 0.0   | 0.0   | 0.0   | 0.1   | 0.0   | 0.0   | 0.0   | 0.0   | 0.0   | 0.0   | 0.0   | 0.0   |
| Dscaml1 | 0.0   | 0.0   | 0.0   | 0.0   | 0.0   | 0.0   | 0.0   | 0.0   | 0.0   | 0.0   | 0.0   | 0.0   |
| Dscc1   | 0.5   | 0.9   | 1.4   | 0.2   | 0.9   | 0.2   | 1.5   | 0.7   | 0.9   | 0.4   | 0.8   | 0.6   |
| Dscr3   | 36.5  | 33.6  | 30.3  | 33.0  | 33.9  | 35.3  | 29.3  | 28.3  | 30.3  | 29.4  | 30.0  | 30.2  |
| Dse     | 58.4  | 67.2  | 69.9  | 61.7  | 57.0  | 60.7  | 63.9  | 61.1  | 64.0  | 48.9  | 56.2  | 66.9  |
| Dsel    | 3.8   | 4.1   | 6.2   | 4.4   | 5.2   | 5.3   | 5.2   | 6.9   | 5.9   | 6.2   | 6.9   | 8.0   |
| Dsg2    | 0.0   | 0.0   | 0.0   | 0.0   | 0.0   | 0.0   | 0.0   | 0.0   | 0.0   | 0.0   | 0.0   | 0.0   |
| Dsn1    | 2.9   | 3.7   | 3.6   | 2.6   | 3.1   | 2.5   | 3.0   | 2.9   | 3.6   | 4.0   | 3.6   | 2.8   |
| Dsp     | 1.3   | 0.5   | 0.4   | 0.5   | 0.3   | 0.4   | 0.1   | 0.4   | 0.1   | 0.4   | 0.4   | 0.7   |
| Dst     | 48.6  | 48.2  | 46.2  | 46.0  | 47.8  | 44.4  | 54.9  | 59.1  | 43.4  | 35.2  | 46.5  | 44.8  |
| Dstn    | 269.9 | 201.7 | 178.3 | 294.9 | 209.5 | 276.6 | 216.5 | 175.7 | 204.6 | 269.7 | 329.0 | 254.5 |
| Dstyk   | 9.5   | 9.1   | 8.5   | 8.7   | 8.4   | 9.5   | 9.0   | 8.5   | 9.5   | 9.1   | 8.7   | 10.3  |
| Dtd1    | 12.0  | 8.7   | 9.1   | 13.2  | 7.8   | 11.3  | 9.7   | 10.9  | 6.8   | 10.5  | 11.0  | 9.6   |
| Dtd2    | 4.0   | 3.7   | 3.1   | 4.0   | 2.8   | 3.6   | 2.6   | 3.9   | 2.7   | 3.2   | 3.5   | 3.3   |
| Dtl     | 0.8   | 2.0   | 3.1   | 0.6   | 2.6   | 0.5   | 2.9   | 1.6   | 2.2   | 1.3   | 1.7   | 1.2   |
| Dtna    | 3.1   | 2.3   | 1.4   | 2.4   | 1.9   | 2.4   | 1.6   | 1.4   | 1.4   | 2.2   | 3.0   | 1.9   |
| Dtnb    | 3.4   | 4.1   | 3.8   | 3.1   | 3.3   | 4.4   | 4.2   | 4.5   | 3.7   | 5.2   | 4.9   | 3.5   |
| Dtnbp1  | 26.0  | 25.3  | 26.1  | 26.6  | 24.9  | 20.9  | 31.5  | 33.1  | 33.8  | 31.1  | 29.3  | 35.9  |
| Dtwd1   | 4.5   | 5.4   | 6.4   | 4.4   | 4.0   | 5.6   | 5.3   | 4.9   | 5.6   | 5.1   | 5.7   | 5.7   |
| Dtwd2   | 0.7   | 0.6   | 0.9   | 1.0   | 0.8   | 0.8   | 0.6   | 0.7   | 0.8   | 0.7   | 0.6   | 0.7   |
| Dtx1    | 0.2   | 0.3   | 0.1   | 0.1   | 0.1   | 0.5   | 0.1   | 0.0   | 0.0   | 0.1   | 0.1   | 0.1   |
| Dtx2    | 3.7   | 3.7   | 3.6   | 3.9   | 3.1   | 3.4   | 4.1   | 4.3   | 4.4   | 5.2   | 4.3   | 3.8   |
| Dtx3    | 8.2   | 9.4   | 9.1   | 8.6   | 7.1   | 9.3   | 7.4   | 9.4   | 11.8  | 8.1   | 8.2   | 8.1   |
| Dtx3l   | 4.5   | 4.2   | 5.9   | 5.7   | 5.0   | 4.4   | 4.0   | 4.7   | 3.8   | 3.3   | 3.7   | 5.6   |
| Dtx4    | 10.6  | 15.8  | 15.4  | 9.6   | 14.0  | 4.1   | 8.0   | 11.7  | 12.6  | 9.7   | 7.7   | 13.4  |
| Dtymk   | 16.2  | 18.9  | 16.1  | 12.6  | 16.7  | 13.2  | 20.4  | 15.3  | 18.7  | 16.9  | 17.8  | 14.2  |
| Duox1   | 0.1   | 0.1   | 0.1   | 0.0   | 0.1   | 0.0   | 0.1   | 0.1   | 0.0   | 0.0   | 0.1   | 0.0   |
| Duox2   | 0.0   | 0.0   | 0.0   | 0.0   | 0.0   | 0.0   | 0.0   | 0.0   | 0.0   | 0.0   | 0.0   | 0.0   |
| Duoxa1  | 0.1   | 0.1   | 0.2   | 0.3   | 0.1   | 0.3   | 0.1   | 0.1   | 0.1   | 0.1   | 0.0   | 0.0   |
| Dupd1   | 0.0   | 0.0   | 0.2   | 0.0   | 0.0   | 0.0   | 0.0   | 0.2   | 0.0   | 0.0   | 0.0   | 0.0   |

Online Table 1

|          |       |       |       |       |       |       |       |       |       |       |       |       |
|----------|-------|-------|-------|-------|-------|-------|-------|-------|-------|-------|-------|-------|
| Dus1l    | 8.6   | 8.5   | 8.0   | 7.4   | 8.3   | 6.3   | 7.5   | 8.8   | 7.7   | 7.4   | 7.7   | 7.5   |
| Dus2l    | 5.2   | 4.5   | 3.6   | 4.8   | 4.2   | 5.8   | 4.5   | 3.7   | 4.1   | 4.3   | 4.5   | 3.7   |
| Dus3l    | 6.2   | 6.3   | 5.8   | 6.4   | 6.5   | 5.4   | 7.0   | 7.6   | 7.1   | 7.0   | 7.9   | 5.8   |
| Dus4l    | 2.0   | 1.6   | 1.0   | 2.0   | 1.7   | 1.4   | 1.2   | 2.0   | 1.6   | 1.3   | 1.4   | 1.8   |
| Dusp1    | 20.4  | 21.0  | 15.6  | 23.8  | 16.0  | 21.1  | 22.2  | 11.2  | 20.9  | 26.0  | 19.9  | 15.3  |
| Dusp10   | 3.1   | 2.5   | 1.8   | 4.5   | 2.2   | 5.0   | 2.2   | 0.8   | 1.0   | 1.5   | 1.6   | 1.5   |
| Dusp11   | 8.0   | 8.8   | 9.6   | 7.5   | 8.5   | 7.1   | 8.9   | 11.1  | 10.9  | 10.3  | 9.8   | 9.4   |
| Dusp12   | 9.3   | 9.3   | 7.3   | 11.4  | 9.1   | 10.5  | 8.0   | 6.9   | 9.4   | 10.0  | 9.1   | 7.9   |
| Dusp13   | 0.3   | 0.1   | 0.1   | 0.1   | 0.3   | 0.1   | 0.1   | 0.1   | 0.0   | 0.1   | 0.1   | 0.1   |
| Dusp14   | 0.7   | 0.6   | 0.2   | 0.8   | 0.5   | 0.9   | 0.3   | 0.5   | 0.5   | 1.7   | 1.1   | 0.5   |
| Dusp15   | 0.4   | 0.1   | 0.3   | 0.4   | 0.3   | 0.3   | 0.3   | 0.2   | 0.1   | 0.3   | 0.4   | 0.5   |
| Dusp16   | 4.1   | 4.0   | 3.3   | 4.0   | 4.6   | 3.9   | 3.5   | 2.9   | 3.0   | 3.8   | 3.4   | 2.8   |
| Dusp18   | 2.6   | 2.2   | 1.6   | 3.2   | 1.9   | 3.4   | 1.7   | 2.1   | 1.5   | 1.4   | 1.8   | 1.4   |
| Dusp19   | 12.8  | 13.0  | 10.8  | 14.7  | 11.6  | 13.9  | 10.9  | 7.5   | 10.1  | 11.5  | 10.6  | 11.0  |
| Dusp2    | 0.0   | 0.0   | 0.0   | 0.0   | 0.0   | 0.1   | 0.1   | 0.0   | 0.1   | 0.0   | 0.0   | 0.0   |
| Dusp22   | 7.4   | 8.5   | 7.9   | 6.4   | 5.6   | 6.5   | 4.5   | 5.6   | 5.7   | 5.6   | 5.8   | 6.2   |
| Dusp23   | 1.2   | 1.5   | 2.1   | 1.3   | 1.6   | 1.3   | 1.5   | 2.5   | 2.0   | 1.3   | 2.3   | 1.5   |
| Dusp27   | 0.5   | 0.5   | 0.4   | 1.4   | 0.4   | 0.5   | 0.6   | 0.5   | 0.7   | 0.5   | 0.4   | 0.9   |
| Dusp28   | 1.4   | 0.6   | 0.6   | 1.0   | 0.8   | 0.7   | 0.9   | 0.9   | 1.0   | 1.1   | 0.9   | 0.9   |
| Dusp3    | 30.6  | 18.4  | 13.2  | 40.9  | 26.7  | 28.4  | 18.0  | 13.4  | 14.4  | 21.7  | 21.0  | 19.4  |
| Dusp4    | 29.9  | 20.5  | 10.2  | 29.8  | 28.6  | 40.7  | 26.8  | 6.8   | 12.6  | 46.6  | 25.9  | 20.6  |
| Dusp5    | 0.3   | 0.4   | 0.5   | 0.3   | 0.7   | 0.3   | 1.1   | 0.7   | 0.7   | 5.1   | 1.6   | 1.5   |
| Dusp6    | 6.6   | 6.4   | 5.3   | 9.2   | 11.6  | 6.5   | 6.7   | 4.4   | 5.3   | 24.9  | 9.2   | 8.5   |
| Dusp7    | 5.1   | 5.1   | 5.7   | 6.0   | 6.3   | 5.7   | 5.5   | 6.2   | 5.3   | 4.7   | 4.9   | 4.4   |
| Dusp8    | 1.8   | 1.3   | 0.7   | 1.4   | 1.4   | 1.3   | 1.4   | 1.1   | 1.0   | 1.0   | 1.2   | 0.8   |
| Dusp9    | 0.0   | 0.0   | 0.0   | 0.1   | 0.1   | 0.1   | 0.2   | 0.1   | 0.0   | 0.1   | 0.0   | 0.1   |
| Dut      | 5.3   | 5.7   | 6.4   | 3.4   | 5.1   | 4.7   | 6.9   | 5.7   | 6.1   | 6.1   | 5.8   | 6.2   |
| Duxbl1   | 0.1   | 0.0   | 0.0   | 0.2   | 0.0   | 0.1   | 0.1   | 0.0   | 0.1   | 0.0   | 0.0   | 0.0   |
| Duxbl2   | 0.1   | 0.1   | 0.3   | 0.0   | 0.2   | 0.1   | 0.1   | 0.3   | 0.1   | 0.1   | 0.0   | 0.2   |
| Duxbl3   | 0.1   | 0.1   | 0.3   | 0.1   | 0.1   | 0.2   | 0.1   | 0.3   | 0.1   | 0.1   | 0.1   | 0.2   |
| Dvl1     | 18.5  | 18.3  | 15.5  | 18.9  | 15.9  | 18.2  | 19.4  | 16.7  | 21.6  | 18.7  | 19.8  | 17.5  |
| Dvl2     | 5.2   | 6.8   | 6.9   | 4.5   | 5.3   | 5.5   | 7.0   | 6.9   | 7.4   | 6.2   | 6.2   | 6.4   |
| Dvl3     | 1.8   | 2.6   | 2.6   | 2.1   | 2.2   | 2.1   | 3.1   | 2.8   | 2.6   | 2.2   | 2.1   | 1.8   |
| Dydc2    | 0.5   | 0.3   | 0.4   | 0.8   | 0.2   | 0.1   | 0.0   | 0.2   | 0.1   | 0.3   | 0.1   | 0.5   |
| Dym      | 11.8  | 11.2  | 10.2  | 13.3  | 9.7   | 15.4  | 10.4  | 10.6  | 9.0   | 8.2   | 11.1  | 8.0   |
| Dync1h1  | 93.6  | 77.7  | 67.2  | 101.6 | 81.7  | 99.4  | 81.1  | 67.8  | 69.1  | 66.4  | 71.4  | 69.6  |
| Dync1i1  | 0.8   | 0.2   | 0.2   | 0.4   | 0.1   | 0.4   | 0.2   | 0.2   | 0.1   | 1.3   | 0.9   | 0.5   |
| Dync1i2  | 81.4  | 72.5  | 67.8  | 89.7  | 72.8  | 79.8  | 71.3  | 66.1  | 65.9  | 80.6  | 86.8  | 84.8  |
| Dync1ii1 | 41.3  | 37.9  | 30.3  | 43.2  | 36.6  | 37.1  | 40.2  | 34.3  | 36.1  | 38.2  | 41.7  | 37.0  |
| Dync1ii2 | 76.0  | 60.3  | 48.6  | 84.1  | 61.9  | 82.3  | 60.4  | 41.7  | 53.3  | 55.2  | 61.9  | 62.9  |
| Dync2h1  | 1.6   | 1.9   | 2.1   | 1.1   | 1.4   | 1.8   | 1.3   | 1.7   | 1.5   | 1.5   | 1.4   | 1.3   |
| Dync2ii1 | 13.2  | 12.9  | 16.2  | 14.9  | 9.3   | 18.4  | 10.4  | 11.2  | 9.0   | 12.1  | 10.8  | 12.9  |
| Dynll1   | 56.8  | 52.7  | 45.7  | 51.8  | 55.8  | 39.5  | 62.7  | 63.9  | 72.5  | 83.0  | 80.7  | 66.1  |
| Dynll2   | 39.7  | 43.0  | 34.8  | 48.9  | 41.6  | 58.0  | 35.7  | 32.2  | 30.1  | 38.1  | 35.9  | 35.0  |
| Dynlrb1  | 174.8 | 167.5 | 165.4 | 225.0 | 158.5 | 162.0 | 185.2 | 197.8 | 148.7 | 150.3 | 209.6 | 165.9 |
| Dynlrb2  | 0.0   | 0.0   | 0.4   | 0.0   | 0.0   | 0.1   | 0.1   | 0.1   | 0.2   | 0.0   | 0.0   | 0.0   |
| Dynlt1a  | 33.9  | 33.6  | 29.8  | 31.2  | 33.0  | 31.6  | 29.5  | 31.1  | 28.4  | 30.2  | 31.6  | 26.4  |
| Dynlt1b  | 35.5  | 36.9  | 35.7  | 35.9  | 36.6  | 36.3  | 32.4  | 35.9  | 32.3  | 34.1  | 33.9  | 29.3  |
| Dynlt1c  | 25.2  | 24.5  | 24.2  | 22.3  | 25.1  | 24.7  | 21.7  | 23.3  | 21.5  | 22.3  | 23.3  | 20.2  |
| Dynlt1f  | 3.2   | 3.7   | 2.9   | 4.5   | 3.3   | 4.1   | 3.3   | 3.4   | 3.8   | 2.2   | 2.9   | 2.9   |
| Dynlt3   | 90.0  | 77.8  | 82.8  | 112.0 | 75.4  | 109.8 | 79.8  | 67.3  | 75.4  | 85.6  | 105.5 | 104.5 |
| Dyrk1a   | 5.9   | 5.5   | 5.7   | 5.8   | 5.9   | 5.6   | 5.6   | 5.8   | 5.9   | 5.9   | 6.4   | 5.9   |
| Dyrk1b   | 3.0   | 4.2   | 3.7   | 3.3   | 2.8   | 3.7   | 3.2   | 5.0   | 4.3   | 3.3   | 3.4   | 2.6   |
| Dyrk2    | 8.2   | 7.9   | 8.3   | 8.7   | 8.6   | 8.1   | 8.8   | 8.8   | 9.5   | 7.5   | 8.8   | 7.3   |
| Dyrk3    | 0.7   | 0.4   | 0.2   | 0.4   | 0.4   | 0.3   | 0.4   | 0.1   | 0.1   | 0.7   | 0.5   | 0.4   |
| Dyrk4    | 0.1   | 0.1   | 0.0   | 0.1   | 0.1   | 0.1   | 0.0   | 0.0   | 0.0   | 0.0   | 0.0   | 0.0   |
| Dysf     | 6.5   | 4.6   | 3.2   | 7.6   | 5.1   | 7.4   | 7.3   | 4.8   | 6.4   | 5.0   | 6.8   | 5.1   |

Online Table 1



|               |      |      |      |      |      |      |      |      |      |      |      |      |
|---------------|------|------|------|------|------|------|------|------|------|------|------|------|
| Dyx1c1        | 1.5  | 1.2  | 1.5  | 0.9  | 0.8  | 2.2  | 0.7  | 0.8  | 0.9  | 0.5  | 1.0  | 1.3  |
| Dzank1        | 0.3  | 0.4  | 0.3  | 0.4  | 0.3  | 0.4  | 0.2  | 0.2  | 0.2  | 0.3  | 0.2  | 0.2  |
| Dzip1         | 26.6 | 20.2 | 18.2 | 25.9 | 17.7 | 30.6 | 16.4 | 10.6 | 11.3 | 15.0 | 16.4 | 15.2 |
| Dzip1l        | 8.3  | 7.5  | 6.9  | 6.5  | 7.7  | 5.8  | 11.9 | 7.3  | 11.6 | 10.9 | 9.7  | 9.7  |
| Dzip3         | 7.0  | 8.8  | 9.2  | 7.1  | 6.3  | 7.4  | 6.1  | 6.1  | 6.8  | 7.9  | 8.8  | 8.0  |
| E030003E18Rik | 35.1 | 36.2 | 43.6 | 48.5 | 20.9 | 43.5 | 27.6 | 31.6 | 30.8 | 18.3 | 29.1 | 37.5 |
| E030011O05Rik | 17.8 | 19.8 | 14.0 | 19.5 | 21.2 | 19.1 | 23.9 | 17.2 | 20.0 | 16.5 | 18.5 | 17.4 |
| E030018B13Rik | 0.0  | 0.1  | 0.1  | 0.3  | 0.0  | 0.0  | 0.2  | 0.1  | 0.1  | 0.1  | 0.0  | 0.1  |
| E030024N20Rik | 1.7  | 1.7  | 1.5  | 2.6  | 1.9  | 2.2  | 2.0  | 2.1  | 1.7  | 1.8  | 1.9  | 1.8  |
| E030030I06Rik | 2.7  | 1.8  | 2.2  | 2.2  | 3.2  | 1.9  | 1.9  | 1.3  | 1.4  | 2.5  | 2.1  | 1.6  |
| E130003G02Rik | 0.0  | 0.0  | 0.0  | 0.0  | 0.0  | 0.0  | 0.0  | 0.0  | 0.0  | 0.0  | 0.0  | 0.0  |
| E130012A19Rik | 0.2  | 0.4  | 0.3  | 0.1  | 0.2  | 0.1  | 0.3  | 0.2  | 0.4  | 0.2  | 0.2  | 0.2  |
| E130018N17Rik | 0.0  | 0.0  | 0.0  | 0.0  | 0.0  | 0.0  | 0.0  | 0.0  | 0.0  | 0.0  | 0.0  | 0.0  |
| E130102H24Rik | 0.7  | 1.8  | 1.8  | 1.4  | 0.6  | 1.9  | 0.9  | 1.7  | 1.0  | 1.0  | 0.6  | 1.7  |
| E130112N10Rik | 0.3  | 0.2  | 0.1  | 0.2  | 0.2  | 0.2  | 0.1  | 0.1  | 0.2  | 0.1  | 0.1  | 0.1  |
| E130114P18Rik | 0.1  | 0.2  | 0.4  | 0.1  | 0.0  | 0.0  | 0.1  | 0.2  | 0.1  | 0.1  | 0.1  | 0.2  |
| E130201H02Rik | 0.1  | 0.1  | 0.1  | 0.1  | 0.2  | 0.2  | 0.1  | 0.1  | 0.0  | 0.1  | 0.2  | 0.3  |
| E130218I03Rik | 1.5  | 1.3  | 1.8  | 1.8  | 1.6  | 1.4  | 2.4  | 1.0  | 1.3  | 1.9  | 0.6  | 1.2  |
| E130304I02Rik | 0.8  | 0.6  | 0.7  | 0.3  | 0.3  | 0.4  | 0.2  | 0.3  | 0.2  | 0.5  | 0.7  | 0.4  |
| E130307A14Rik | 1.2  | 1.0  | 0.8  | 0.7  | 0.9  | 0.7  | 1.0  | 1.0  | 0.9  | 1.0  | 0.8  | 0.9  |
| E130308A19Rik | 1.9  | 2.2  | 1.5  | 2.1  | 1.9  | 2.6  | 2.6  | 2.5  | 2.9  | 2.2  | 2.4  | 2.5  |
| E130309D02Rik | 4.5  | 4.3  | 3.9  | 4.3  | 5.0  | 4.5  | 5.9  | 3.9  | 5.0  | 5.2  | 3.5  | 4.0  |
| E130309D14Rik | 0.1  | 0.1  | 0.0  | 0.2  | 0.0  | 0.1  | 0.2  | 0.1  | 0.0  | 0.2  | 0.0  | 0.1  |
| E130310I04Rik | 0.1  | 0.2  | 0.1  | 0.4  | 0.2  | 0.1  | 0.7  | 0.1  | 0.2  | 0.1  | 0.2  | 0.1  |
| E130311K13Rik | 8.4  | 8.2  | 9.5  | 7.0  | 5.8  | 7.9  | 6.6  | 6.7  | 7.2  | 7.5  | 7.6  | 9.6  |
| E130317F20Rik | 1.3  | 0.8  | 0.9  | 1.0  | 0.9  | 1.0  | 1.2  | 1.2  | 1.4  | 1.0  | 1.4  | 1.2  |
| E230016K23Rik | 0.4  | 0.6  | 0.7  | 0.2  | 0.5  | 0.5  | 0.6  | 0.6  | 0.6  | 0.3  | 0.5  | 0.4  |
| E230016M11Rik | 2.1  | 1.0  | 1.4  | 2.0  | 1.4  | 3.2  | 1.3  | 1.1  | 0.8  | 1.8  | 1.1  | 1.1  |
| E230025N22Rik | 0.2  | 0.1  | 0.2  | 0.1  | 0.1  | 0.1  | 0.1  | 0.1  | 0.0  | 0.1  | 0.2  | 0.1  |
| E2f1          | 9.2  | 7.9  | 6.6  | 9.7  | 7.1  | 11.0 | 7.4  | 4.9  | 6.0  | 6.4  | 6.4  | 5.4  |
| E2f2          | 0.2  | 0.0  | 0.1  | 0.2  | 0.9  | 0.0  | 0.2  | 0.2  | 0.1  | 0.3  | 0.2  | 0.2  |
| E2f3          | 5.2  | 5.5  | 5.4  | 5.2  | 4.5  | 5.4  | 5.2  | 4.3  | 4.9  | 4.2  | 4.7  | 4.7  |
| E2f4          | 6.1  | 7.5  | 6.6  | 6.3  | 7.0  | 6.4  | 8.3  | 7.9  | 7.5  | 6.9  | 6.5  | 6.1  |
| E2f5          | 3.4  | 3.3  | 3.2  | 3.0  | 3.3  | 3.1  | 3.8  | 3.2  | 3.4  | 3.0  | 3.8  | 3.3  |
| E2f6          | 12.9 | 14.1 | 9.9  | 16.7 | 13.5 | 14.2 | 12.3 | 9.5  | 10.2 | 11.7 | 14.4 | 10.8 |
| E2f7          | 0.2  | 0.3  | 0.5  | 0.1  | 0.5  | 0.1  | 0.8  | 0.3  | 0.5  | 0.2  | 0.3  | 0.1  |
| E2f8          | 0.4  | 0.6  | 1.1  | 0.2  | 1.0  | 0.1  | 1.1  | 0.7  | 0.7  | 0.4  | 0.8  | 0.4  |
| E330009J07Rik | 0.5  | 0.6  | 0.9  | 0.3  | 0.7  | 0.9  | 0.4  | 0.6  | 0.6  | 0.6  | 0.7  | 1.7  |
| E330011O21Rik | 0.4  | 0.2  | 0.5  | 0.1  | 0.3  | 0.2  | 0.1  | 0.5  | 0.1  | 0.8  | 0.6  | 0.3  |
| E330013P04Rik | 1.2  | 0.2  | 0.2  | 0.3  | 0.3  | 0.5  | 0.0  | 0.3  | 0.1  | 0.7  | 0.2  | 0.1  |
| E330020D12Rik | 0.2  | 0.3  | 0.6  | 0.7  | 0.4  | 0.4  | 0.3  | 0.4  | 0.3  | 0.2  | 0.3  | 0.3  |
| E330023G01Rik | 0.2  | 0.0  | 0.1  | 0.0  | 0.2  | 0.1  | 0.2  | 0.1  | 0.0  | 0.0  | 0.1  | 0.1  |
| E330033B04Rik | 0.2  | 0.3  | 0.3  | 0.1  | 0.2  | 0.2  | 0.3  | 0.2  | 0.2  | 0.2  | 0.3  | 0.1  |
| E330034G19Rik | 0.1  | 0.0  | 0.1  | 0.0  | 0.1  | 0.1  | 0.0  | 0.0  | 0.1  | 0.0  | 0.1  | 0.0  |
| E430018J23Rik | 2.5  | 2.2  | 2.5  | 2.7  | 2.0  | 2.7  | 2.2  | 2.4  | 2.3  | 2.9  | 2.2  | 2.8  |
| E430025E21Rik | 39.1 | 31.9 | 27.1 | 42.1 | 33.8 | 42.1 | 28.4 | 28.4 | 25.5 | 30.2 | 32.2 | 31.0 |
| E4f1          | 3.4  | 3.3  | 4.0  | 4.4  | 3.3  | 3.0  | 3.7  | 4.0  | 4.1  | 4.0  | 3.5  | 3.8  |
| E530011L22Rik | 1.0  | 0.8  | 1.0  | 0.9  | 0.6  | 0.9  | 0.7  | 0.9  | 0.8  | 0.8  | 0.8  | 1.2  |
| Eaf1          | 14.3 | 15.4 | 11.5 | 18.3 | 17.1 | 14.6 | 14.9 | 11.6 | 13.2 | 13.7 | 13.5 | 12.0 |
| Eaf2          | 0.3  | 0.2  | 0.2  | 0.2  | 0.3  | 0.3  | 0.3  | 0.4  | 0.2  | 0.2  | 0.2  | 0.2  |
| Eapp          | 30.5 | 27.1 | 28.5 | 27.6 | 23.6 | 32.3 | 30.6 | 31.0 | 26.1 | 28.1 | 33.3 | 34.2 |
| Ears2         | 5.3  | 3.6  | 2.9  | 4.2  | 3.8  | 4.7  | 3.3  | 3.8  | 4.1  | 4.2  | 3.1  | 3.4  |
| Ebag9         | 7.6  | 6.7  | 8.2  | 8.1  | 6.1  | 7.7  | 8.0  | 8.3  | 7.0  | 7.6  | 9.4  | 9.5  |
| Ebf1          | 13.1 | 22.2 | 31.9 | 16.3 | 15.1 | 11.2 | 22.8 | 29.8 | 24.2 | 11.1 | 18.8 | 17.6 |
| Ebf2          | 2.2  | 3.4  | 4.1  | 3.1  | 2.6  | 4.0  | 3.4  | 4.5  | 3.4  | 2.7  | 3.0  | 3.3  |
| Ebf3          | 2.1  | 4.4  | 4.4  | 4.4  | 3.6  | 3.9  | 6.5  | 4.9  | 5.4  | 2.8  | 4.1  | 3.8  |
| Ebf4          | 0.2  | 0.7  | 0.6  | 0.2  | 0.6  | 0.7  | 0.6  | 0.2  | 0.6  | 0.7  | 0.7  | 0.6  |

Online Table 1

|          |        |        |        |        |        |        |        |        |        |        |        |        |
|----------|--------|--------|--------|--------|--------|--------|--------|--------|--------|--------|--------|--------|
| Ebi3     | 0.6    | 0.0    | 0.1    | 2.6    | 4.7    | 0.0    | 0.8    | 0.1    | 0.3    | 0.5    | 0.2    | 0.1    |
| Ebna1bp2 | 14.3   | 12.7   | 10.4   | 16.7   | 12.7   | 13.6   | 13.5   | 12.0   | 11.1   | 13.3   | 14.4   | 13.5   |
| Ebp      | 12.5   | 12.9   | 13.1   | 12.5   | 12.1   | 11.4   | 16.5   | 18.1   | 14.4   | 12.8   | 18.2   | 13.7   |
| Ebpl     | 6.7    | 6.1    | 5.2    | 5.3    | 5.8    | 5.4    | 5.7    | 5.8    | 6.0    | 6.0    | 5.7    | 5.3    |
| Ecd      | 11.7   | 10.8   | 10.7   | 13.0   | 10.1   | 11.5   | 10.5   | 10.9   | 9.4    | 10.5   | 10.9   | 10.0   |
| Ece1     | 54.1   | 49.0   | 49.4   | 56.1   | 46.3   | 54.0   | 49.2   | 45.3   | 37.6   | 33.3   | 39.4   | 38.7   |
| Ece2     | 18.7   | 14.8   | 12.3   | 16.9   | 17.0   | 20.5   | 14.9   | 13.6   | 15.0   | 14.2   | 13.1   | 16.0   |
| Ecel1    | 0.1    | 0.0    | 0.0    | 0.0    | 0.0    | 0.1    | 0.0    | 0.0    | 0.0    | 0.0    | 0.0    | 0.0    |
| Ech1     | 36.7   | 30.7   | 31.3   | 32.8   | 32.9   | 38.7   | 32.6   | 38.7   | 33.1   | 37.1   | 33.6   | 33.8   |
| Echdc1   | 4.1    | 4.3    | 4.4    | 4.0    | 3.8    | 4.2    | 4.6    | 5.2    | 3.7    | 3.7    | 5.4    | 4.1    |
| Echdc2   | 9.5    | 12.1   | 14.5   | 5.8    | 6.1    | 8.7    | 7.0    | 11.5   | 9.0    | 9.9    | 8.1    | 9.1    |
| Echdc3   | 5.6    | 4.5    | 4.3    | 4.3    | 2.7    | 6.7    | 3.5    | 3.1    | 3.1    | 2.6    | 2.7    | 3.2    |
| Echs1    | 31.0   | 33.9   | 35.0   | 16.2   | 22.8   | 19.2   | 26.7   | 44.2   | 35.7   | 28.7   | 31.4   | 28.0   |
| Eci1     | 26.3   | 20.4   | 15.3   | 19.5   | 16.5   | 22.7   | 16.1   | 16.8   | 18.9   | 22.6   | 19.1   | 18.8   |
| Eci2     | 32.5   | 25.9   | 26.3   | 26.5   | 24.1   | 28.5   | 23.0   | 27.9   | 23.6   | 24.9   | 21.6   | 24.5   |
| Eci3     | 0.1    | 0.3    | 0.4    | 0.1    | 0.2    | 0.2    | 0.0    | 0.1    | 0.2    | 0.2    | 0.4    | 0.5    |
| Ecm1     | 97.9   | 109.6  | 103.2  | 119.6  | 128.0  | 164.6  | 146.2  | 125.9  | 108.9  | 102.8  | 117.1  | 95.4   |
| Ecm2     | 0.6    | 0.8    | 1.1    | 1.0    | 0.8    | 0.8    | 0.6    | 1.0    | 0.6    | 0.6    | 0.6    | 0.8    |
| Ecscr    | 9.7    | 6.7    | 8.3    | 9.4    | 12.5   | 5.3    | 10.8   | 9.5    | 7.1    | 5.1    | 5.9    | 6.6    |
| Ecsit    | 7.7    | 7.2    | 6.4    | 6.6    | 6.3    | 8.6    | 6.3    | 7.0    | 7.4    | 6.2    | 6.9    | 6.4    |
| Ect2     | 1.4    | 2.8    | 4.6    | 0.9    | 4.0    | 0.8    | 5.2    | 1.9    | 4.3    | 2.8    | 3.9    | 2.8    |
| Ect2l    | 0.0    | 0.0    | 0.0    | 0.0    | 0.0    | 0.1    | 0.0    | 0.1    | 0.0    | 0.0    | 0.0    | 0.0    |
| Eda      | 0.8    | 1.1    | 1.1    | 0.5    | 0.7    | 0.5    | 0.9    | 0.9    | 1.0    | 0.5    | 0.6    | 0.7    |
| Eda2r    | 20.5   | 20.9   | 20.5   | 19.7   | 21.1   | 18.5   | 18.8   | 14.8   | 20.9   | 30.7   | 26.0   | 24.8   |
| Edar     | 0.1    | 0.0    | 0.0    | 0.0    | 0.1    | 0.0    | 0.0    | 0.0    | 0.0    | 0.0    | 0.0    | 0.0    |
| Edaradd  | 0.1    | 0.1    | 0.0    | 0.1    | 0.0    | 0.0    | 0.0    | 0.1    | 0.0    | 0.0    | 0.0    | 0.0    |
| Edc3     | 1.2    | 1.7    | 2.1    | 1.4    | 2.0    | 1.4    | 1.9    | 1.7    | 1.7    | 1.6    | 1.7    | 1.4    |
| Edc4     | 9.3    | 11.0   | 9.7    | 8.7    | 10.1   | 9.7    | 11.0   | 9.9    | 10.0   | 9.0    | 8.6    | 8.0    |
| Edem1    | 21.6   | 21.6   | 20.0   | 24.1   | 25.7   | 20.4   | 21.8   | 22.1   | 23.4   | 19.8   | 21.2   | 21.6   |
| Edem2    | 12.8   | 11.3   | 11.7   | 14.3   | 15.5   | 11.3   | 12.8   | 13.1   | 12.6   | 12.8   | 10.8   | 11.5   |
| Edem3    | 19.6   | 18.6   | 18.4   | 21.1   | 19.4   | 18.7   | 19.3   | 17.5   | 18.6   | 17.6   | 20.2   | 21.8   |
| Edf1     | 172.1  | 125.8  | 145.6  | 154.4  | 149.5  | 136.2  | 160.3  | 163.6  | 156.7  | 156.7  | 157.2  | 179.6  |
| Edil3    | 0.1    | 0.0    | 0.0    | 0.2    | 0.6    | 0.0    | 0.1    | 0.1    | 0.0    | 0.1    | 0.1    | 0.1    |
| Edn1     | 8.1    | 5.1    | 4.1    | 5.6    | 3.3    | 3.8    | 2.7    | 2.3    | 2.3    | 4.8    | 3.1    | 2.3    |
| Ednra    | 0.1    | 0.1    | 0.2    | 0.0    | 0.1    | 0.0    | 0.2    | 0.5    | 0.3    | 0.6    | 0.6    | 0.7    |
| Ednrb    | 0.1    | 0.1    | 0.1    | 0.3    | 0.5    | 0.2    | 0.1    | 0.1    | 0.1    | 0.1    | 0.1    | 0.0    |
| Eea1     | 12.6   | 10.0   | 9.4    | 15.8   | 12.9   | 13.9   | 11.2   | 7.6    | 8.6    | 11.4   | 12.9   | 13.1   |
| Eed      | 13.0   | 13.8   | 15.4   | 13.6   | 13.3   | 13.1   | 12.6   | 11.5   | 13.0   | 14.6   | 13.9   | 13.4   |
| Eef1a1   | 4875.7 | 3820.5 | 3815.1 | 3914.7 | 3706.4 | 4497.8 | 3663.6 | 5103.2 | 4069.7 | 4452.1 | 5121.7 | 4572.8 |
| Eef1a2   | 2.7    | 3.7    | 6.4    | 3.2    | 2.8    | 3.6    | 0.8    | 3.3    | 0.5    | 1.0    | 1.2    | 1.4    |
| Eef1b2   | 263.6  | 210.2  | 205.7  | 193.0  | 195.7  | 217.9  | 191.6  | 237.3  | 185.3  | 249.6  | 239.7  | 220.6  |
| Eef1d    | 101.8  | 80.1   | 81.0   | 89.5   | 72.1   | 96.4   | 88.7   | 83.9   | 70.3   | 85.5   | 96.1   | 89.0   |
| Eef1e1   | 23.5   | 21.0   | 16.1   | 27.8   | 19.3   | 21.0   | 21.3   | 17.3   | 16.0   | 22.1   | 23.5   | 19.5   |
| Eef1g    | 580.1  | 551.9  | 561.0  | 493.6  | 469.4  | 540.5  | 563.0  | 628.1  | 531.8  | 512.4  | 624.7  | 565.9  |
| Eef2     | 766.9  | 611.3  | 638.8  | 591.2  | 648.4  | 717.1  | 649.8  | 816.0  | 693.4  | 792.4  | 758.3  | 748.1  |
| Eef2k    | 3.3    | 3.9    | 4.2    | 3.4    | 2.8    | 3.8    | 4.1    | 6.2    | 4.3    | 3.4    | 4.4    | 3.7    |
| Eefsec   | 5.0    | 5.3    | 5.0    | 4.9    | 4.2    | 5.8    | 5.2    | 4.7    | 3.4    | 3.9    | 4.0    | 4.3    |
| Eepd1    | 0.2    | 0.2    | 0.3    | 0.1    | 0.5    | 0.1    | 0.2    | 0.3    | 0.1    | 0.1    | 0.1    | 0.1    |
| Efcab1   | 0.1    | 0.1    | 0.1    | 0.0    | 0.0    | 0.0    | 0.0    | 0.0    | 0.0    | 0.1    | 0.0    | 0.1    |
| Efcab11  | 0.4    | 0.5    | 0.9    | 0.1    | 0.5    | 0.3    | 1.3    | 0.6    | 1.1    | 0.3    | 0.9    | 0.3    |
| Efcab12  | 0.1    | 0.1    | 0.3    | 0.1    | 0.0    | 0.1    | 0.1    | 0.2    | 0.0    | 0.1    | 0.1    | 0.0    |
| Efcab14  | 9.9    | 8.8    | 9.8    | 10.4   | 9.3    | 10.2   | 8.7    | 8.1    | 8.3    | 7.8    | 8.1    | 8.1    |
| Efcab2   | 0.8    | 0.7    | 0.6    | 0.9    | 0.4    | 0.8    | 0.6    | 0.5    | 0.6    | 0.6    | 0.7    | 0.7    |
| Efcab3   | 0.0    | 0.1    | 0.0    | 0.1    | 0.1    | 0.0    | 0.1    | 0.0    | 0.2    | 0.0    | 0.0    | 0.1    |
| Efcab4a  | 1.8    | 1.4    | 1.2    | 1.9    | 0.9    | 2.2    | 1.2    | 0.9    | 1.0    | 1.0    | 0.7    | 1.0    |
| Efcab4b  | 0.6    | 0.3    | 0.8    | 0.3    | 1.0    | 0.7    | 0.4    | 0.7    | 0.2    | 0.3    | 0.5    | 0.5    |
| Efcab5   | 0.2    | 0.2    | 0.2    | 0.4    | 0.2    | 0.2    | 0.1    | 0.1    | 0.1    | 0.1    | 0.1    | 0.1    |

Online Table 1

|        |       |       |       |       |       |       |       |       |       |       |       |       |
|--------|-------|-------|-------|-------|-------|-------|-------|-------|-------|-------|-------|-------|
| Efcab6 | 0.0   | 0.0   | 0.0   | 0.0   | 0.0   | 0.0   | 0.0   | 0.0   | 0.0   | 0.0   | 0.0   | 0.0   |
| Efcab7 | 1.7   | 1.4   | 1.6   | 1.5   | 1.3   | 2.3   | 1.2   | 1.4   | 1.3   | 1.5   | 1.4   | 1.3   |
| Efcab8 | 0.0   | 0.1   | 0.0   | 0.0   | 0.0   | 0.1   | 0.0   | 0.0   | 0.2   | 0.0   | 0.0   | 0.0   |
| Efcab9 | 0.1   | 0.2   | 0.1   | 0.0   | 0.3   | 0.3   | 0.2   | 0.1   | 0.2   | 0.2   | 0.3   | 0.2   |
| Efcc1  | 0.1   | 0.0   | 0.1   | 0.1   | 0.1   | 0.1   | 0.1   | 0.1   | 0.0   | 0.0   | 0.0   | 0.0   |
| Efemp1 | 346.4 | 234.1 | 249.4 | 109.7 | 92.7  | 48.8  | 152.9 | 155.9 | 159.4 | 215.2 | 219.7 | 204.5 |
| Efemp2 | 174.3 | 149.0 | 147.4 | 197.9 | 170.6 | 182.9 | 211.7 | 184.6 | 196.5 | 177.5 | 180.2 | 191.7 |
| Efha1  | 37.0  | 33.2  | 33.1  | 37.5  | 30.9  | 36.1  | 33.3  | 34.1  | 35.4  | 38.4  | 39.4  | 40.3  |
| Efha2  | 1.8   | 2.1   | 2.1   | 2.6   | 2.1   | 1.9   | 2.5   | 2.3   | 2.1   | 2.6   | 2.9   | 2.6   |
| Efha3  | 0.1   | 0.4   | 0.3   | 0.1   | 0.1   | 0.2   | 0.2   | 0.1   | 0.1   | 0.1   | 0.1   | 0.2   |
| Efha4  | 3.2   | 3.2   | 3.2   | 2.7   | 2.1   | 3.3   | 2.4   | 2.5   | 2.1   | 2.8   | 2.7   | 2.4   |
| Efha5  | 0.0   | 0.0   | 0.0   | 0.0   | 0.0   | 0.0   | 0.0   | 0.0   | 0.0   | 0.0   | 0.0   | 0.0   |
| Efhd1  | 0.2   | 0.2   | 0.2   | 0.1   | 0.1   | 0.0   | 0.0   | 0.2   | 0.1   | 0.1   | 0.0   | 0.1   |
| Efhd2  | 12.9  | 12.1  | 12.5  | 22.0  | 32.1  | 11.1  | 15.6  | 12.8  | 12.2  | 15.6  | 13.3  | 13.9  |
| Efna1  | 0.8   | 1.0   | 1.8   | 0.6   | 0.9   | 0.4   | 0.8   | 2.9   | 1.6   | 2.0   | 1.7   | 1.2   |
| Efna2  | 0.7   | 1.3   | 1.7   | 0.5   | 0.6   | 0.7   | 0.9   | 1.1   | 1.1   | 1.5   | 1.4   | 1.2   |
| Efna3  | 2.1   | 2.9   | 1.9   | 3.0   | 1.5   | 2.7   | 1.7   | 1.4   | 1.2   | 1.7   | 1.7   | 1.6   |
| Efna4  | 3.4   | 3.1   | 3.0   | 3.1   | 2.4   | 3.6   | 3.9   | 3.4   | 3.7   | 4.2   | 4.5   | 3.1   |
| Efna5  | 1.5   | 1.7   | 2.3   | 1.1   | 1.8   | 1.4   | 2.1   | 2.0   | 1.7   | 2.4   | 2.0   | 1.6   |
| Efnb1  | 6.1   | 5.7   | 5.9   | 6.5   | 6.1   | 5.5   | 9.1   | 7.5   | 12.3  | 15.3  | 13.8  | 12.0  |
| Efnb2  | 4.1   | 3.5   | 3.4   | 3.4   | 3.8   | 3.3   | 5.0   | 3.3   | 4.6   | 7.0   | 5.3   | 4.1   |
| Efnb3  | 0.1   | 0.1   | 0.0   | 0.1   | 0.1   | 0.1   | 0.0   | 0.0   | 0.1   | 0.0   | 0.0   | 0.0   |
| Efr3a  | 23.3  | 22.4  | 20.0  | 22.7  | 19.1  | 23.4  | 19.1  | 19.1  | 19.5  | 20.7  | 22.6  | 20.5  |
| Efr3b  | 2.4   | 2.6   | 2.7   | 2.4   | 2.2   | 2.9   | 1.9   | 2.4   | 1.9   | 1.4   | 1.6   | 2.2   |
| Efs    | 2.1   | 3.8   | 4.3   | 0.6   | 1.8   | 1.9   | 2.3   | 6.0   | 4.1   | 2.2   | 3.1   | 2.9   |
| Eftud1 | 6.7   | 6.3   | 6.3   | 7.1   | 5.8   | 8.1   | 5.6   | 6.5   | 5.2   | 6.6   | 6.3   | 5.7   |
| Eftud2 | 16.8  | 15.5  | 16.8  | 20.0  | 19.1  | 17.4  | 17.8  | 17.7  | 14.2  | 15.5  | 15.9  | 16.5  |
| Egf    | 0.2   | 0.1   | 0.1   | 0.2   | 0.1   | 0.2   | 0.1   | 0.1   | 0.1   | 0.2   | 0.2   | 0.1   |
| Egfl6  | 0.0   | 0.0   | 0.1   | 0.0   | 0.0   | 0.0   | 0.0   | 0.0   | 0.0   | 0.0   | 0.1   | 0.0   |
| Egfl7  | 3.4   | 1.5   | 2.0   | 1.7   | 1.7   | 2.6   | 2.2   | 2.8   | 2.7   | 1.6   | 0.6   | 1.4   |
| Egfl8  | 0.2   | 0.1   | 0.4   | 0.2   | 0.1   | 0.4   | 0.4   | 0.4   | 0.3   | 0.3   | 0.3   | 0.1   |
| Egflam | 0.1   | 0.1   | 0.3   | 0.1   | 0.1   | 0.0   | 0.2   | 0.3   | 0.2   | 0.1   | 0.1   | 0.1   |
| Egfr   | 12.7  | 14.6  | 19.3  | 8.9   | 12.3  | 8.6   | 11.9  | 16.6  | 15.3  | 30.3  | 20.4  | 19.6  |
| Egln1  | 24.3  | 21.2  | 15.8  | 29.3  | 23.7  | 31.6  | 23.2  | 13.4  | 19.6  | 19.5  | 19.8  | 19.9  |
| Egln2  | 15.4  | 14.7  | 13.9  | 17.0  | 15.6  | 16.9  | 18.1  | 18.8  | 17.6  | 18.7  | 16.3  | 16.5  |
| Egln3  | 1.6   | 2.3   | 1.3   | 2.0   | 1.9   | 2.9   | 1.7   | 0.7   | 1.0   | 2.3   | 1.5   | 1.0   |
| Egr1   | 0.6   | 1.0   | 1.1   | 0.4   | 1.1   | 0.5   | 0.8   | 0.4   | 1.1   | 8.1   | 1.8   | 1.4   |
| Egr2   | 0.2   | 0.2   | 0.4   | 0.6   | 0.9   | 0.1   | 0.7   | 0.2   | 1.0   | 3.4   | 0.9   | 1.3   |
| Egr3   | 0.0   | 0.0   | 0.0   | 0.0   | 0.1   | 0.0   | 0.1   | 0.1   | 0.2   | 0.7   | 0.1   | 0.2   |
| Ehbp1  | 9.3   | 11.8  | 13.2  | 7.8   | 8.0   | 8.1   | 10.6  | 9.8   | 10.1  | 9.2   | 10.8  | 10.8  |
| Ehbp11 | 22.3  | 18.1  | 15.2  | 28.1  | 28.6  | 19.8  | 33.0  | 18.6  | 26.5  | 21.7  | 25.3  | 22.3  |
| Ehd1   | 39.3  | 30.1  | 27.4  | 33.9  | 35.7  | 29.3  | 40.8  | 42.6  | 37.1  | 39.2  | 45.0  | 35.8  |
| Ehd2   | 60.4  | 69.4  | 71.5  | 57.1  | 68.8  | 55.9  | 80.5  | 108.2 | 84.2  | 57.0  | 74.6  | 68.2  |
| Ehd3   | 16.2  | 16.9  | 17.3  | 21.0  | 13.4  | 14.8  | 16.0  | 13.0  | 19.2  | 12.4  | 15.9  | 15.5  |
| Ehd4   | 6.9   | 4.4   | 3.8   | 12.4  | 12.1  | 6.4   | 5.4   | 3.3   | 3.6   | 5.1   | 5.0   | 4.2   |
| Ehf    | 0.0   | 0.0   | 0.0   | 0.0   | 0.0   | 0.0   | 0.0   | 0.0   | 0.0   | 0.0   | 0.0   | 0.0   |
| Ehhadh | 1.8   | 2.2   | 1.9   | 1.7   | 1.7   | 1.8   | 2.3   | 1.8   | 1.8   | 1.4   | 1.8   | 2.0   |
| Ehmt1  | 6.5   | 8.1   | 8.7   | 7.3   | 7.5   | 6.8   | 7.2   | 8.3   | 7.2   | 7.3   | 7.9   | 7.9   |
| Ehmt2  | 25.9  | 24.3  | 24.7  | 22.4  | 22.5  | 24.3  | 23.6  | 22.7  | 24.3  | 29.5  | 23.7  | 23.3  |
| Ei24   | 42.4  | 44.4  | 41.9  | 41.2  | 45.7  | 36.5  | 41.6  | 33.7  | 41.0  | 42.3  | 42.9  | 39.2  |
| Eid1   | 21.0  | 17.1  | 21.0  | 30.0  | 25.5  | 26.1  | 26.9  | 22.2  | 23.5  | 32.8  | 32.9  | 35.2  |
| Eid2   | 8.4   | 7.5   | 8.3   | 7.8   | 6.5   | 8.7   | 8.8   | 8.7   | 8.3   | 9.5   | 8.1   | 9.4   |
| Eid2b  | 1.9   | 2.5   | 2.3   | 2.2   | 2.0   | 2.5   | 2.5   | 2.0   | 2.3   | 2.9   | 1.7   | 2.4   |
| Eid3   | 1.3   | 0.7   | 0.4   | 1.7   | 1.3   | 1.6   | 1.0   | 0.5   | 0.5   | 1.7   | 0.5   | 0.8   |
| Eif1   | 36.6  | 38.5  | 36.8  | 33.1  | 47.5  | 37.6  | 38.6  | 46.7  | 47.0  | 48.9  | 43.9  | 43.5  |
| Eif1a  | 43.1  | 33.8  | 32.5  | 50.4  | 43.6  | 41.2  | 43.3  | 39.2  | 39.5  | 45.4  | 55.3  | 47.2  |
| Eif1ad | 5.5   | 4.8   | 5.2   | 5.6   | 5.9   | 5.3   | 4.9   | 5.8   | 5.3   | 4.7   | 5.8   | 4.6   |

Online Table 1

|           |       |       |       |       |       |       |       |       |       |       |       |       |
|-----------|-------|-------|-------|-------|-------|-------|-------|-------|-------|-------|-------|-------|
| Eif1ax    | 64.1  | 56.1  | 52.5  | 66.0  | 57.0  | 62.5  | 53.6  | 60.8  | 58.3  | 62.5  | 71.7  | 62.9  |
| Eif1b     | 24.7  | 21.4  | 24.6  | 33.6  | 22.5  | 33.9  | 23.7  | 24.9  | 18.7  | 22.1  | 22.2  | 24.2  |
| Eif2a     | 28.9  | 24.6  | 24.4  | 23.9  | 21.3  | 26.3  | 22.0  | 24.0  | 20.9  | 24.0  | 27.7  | 27.2  |
| Eif2ak1   | 12.9  | 14.9  | 15.4  | 15.7  | 12.8  | 13.4  | 14.6  | 14.1  | 12.9  | 11.7  | 14.4  | 14.6  |
| Eif2ak2   | 24.9  | 18.2  | 23.0  | 27.2  | 20.5  | 16.6  | 18.5  | 13.5  | 14.7  | 13.9  | 17.4  | 25.1  |
| Eif2ak3   | 11.0  | 10.1  | 9.4   | 10.3  | 10.6  | 10.2  | 11.8  | 10.0  | 10.6  | 8.6   | 10.4  | 10.7  |
| Eif2ak4   | 4.5   | 4.9   | 4.6   | 3.8   | 5.2   | 4.2   | 4.9   | 4.3   | 4.9   | 5.1   | 5.0   | 5.0   |
| Eif2b1    | 14.5  | 14.1  | 11.4  | 14.1  | 12.6  | 13.0  | 13.7  | 13.3  | 13.1  | 14.4  | 13.6  | 12.1  |
| Eif2b2    | 17.9  | 17.4  | 15.5  | 20.7  | 16.4  | 18.0  | 17.6  | 17.5  | 15.8  | 16.8  | 17.5  | 16.0  |
| Eif2b3    | 11.9  | 10.8  | 8.7   | 12.6  | 10.7  | 11.4  | 11.0  | 9.8   | 9.9   | 11.2  | 12.2  | 11.8  |
| Eif2b4    | 9.0   | 9.3   | 8.7   | 10.0  | 8.6   | 8.2   | 9.4   | 9.3   | 8.2   | 8.1   | 8.7   | 9.7   |
| Eif2b5    | 32.0  | 27.3  | 24.0  | 30.4  | 24.3  | 30.6  | 25.0  | 26.4  | 23.9  | 25.1  | 25.7  | 27.1  |
| Eif2c1    | 5.4   | 6.3   | 5.6   | 5.1   | 4.7   | 6.5   | 4.5   | 5.4   | 4.6   | 4.4   | 4.3   | 4.1   |
| Eif2c2    | 5.5   | 6.6   | 5.1   | 5.8   | 6.8   | 6.6   | 6.4   | 4.8   | 5.9   | 5.1   | 5.9   | 5.0   |
| Eif2c3    | 4.5   | 5.1   | 4.7   | 4.4   | 4.6   | 5.4   | 3.4   | 3.9   | 3.1   | 4.2   | 4.0   | 3.7   |
| Eif2c4    | 1.3   | 1.6   | 1.7   | 1.7   | 1.2   | 1.0   | 1.1   | 1.1   | 1.3   | 1.1   | 1.4   | 1.4   |
| Eif2d     | 18.3  | 18.2  | 18.0  | 18.6  | 16.3  | 18.7  | 15.5  | 16.8  | 15.4  | 16.0  | 17.8  | 16.0  |
| Eif2s1    | 32.9  | 33.3  | 30.4  | 34.0  | 33.6  | 28.8  | 34.6  | 31.8  | 30.2  | 35.4  | 38.6  | 36.3  |
| Eif2s2    | 87.7  | 71.8  | 69.3  | 76.7  | 61.7  | 72.2  | 75.2  | 78.1  | 72.5  | 75.7  | 94.0  | 87.5  |
| Eif2s3x   | 64.5  | 51.2  | 47.8  | 64.1  | 52.6  | 62.1  | 52.7  | 49.7  | 47.3  | 53.7  | 61.7  | 56.5  |
| Eif2s3y   | 25.7  | 24.2  | 30.2  | 28.4  | 24.9  | 25.9  | 24.9  | 27.2  | 24.6  | 26.1  | 23.4  | 31.8  |
| Eif3a     | 114.6 | 100.3 | 114.6 | 140.3 | 111.2 | 111.5 | 126.9 | 105.2 | 88.8  | 104.3 | 135.8 | 137.8 |
| Eif3b     | 53.6  | 53.2  | 47.1  | 59.7  | 59.5  | 57.5  | 61.7  | 56.8  | 51.0  | 56.7  | 56.7  | 55.6  |
| Eif3c     | 121.5 | 85.9  | 86.8  | 121.4 | 85.6  | 116.5 | 91.0  | 105.4 | 80.1  | 90.4  | 112.0 | 95.4  |
| Eif3d     | 59.7  | 59.8  | 57.1  | 65.2  | 53.2  | 57.7  | 60.9  | 63.2  | 53.6  | 57.9  | 61.1  | 58.7  |
| Eif3e     | 126.4 | 99.7  | 97.2  | 103.2 | 101.3 | 111.9 | 91.8  | 100.7 | 94.1  | 119.9 | 123.5 | 110.4 |
| Eif3f     | 87.0  | 77.1  | 67.6  | 61.4  | 67.5  | 75.7  | 66.7  | 81.3  | 65.3  | 70.9  | 79.1  | 68.4  |
| Eif3g     | 67.0  | 73.7  | 68.3  | 69.2  | 60.9  | 71.8  | 66.6  | 69.2  | 59.0  | 71.8  | 71.6  | 70.0  |
| Eif3h     | 124.9 | 109.9 | 111.6 | 116.1 | 104.7 | 120.3 | 103.3 | 125.5 | 100.0 | 110.6 | 122.4 | 114.6 |
| Eif3i     | 107.0 | 87.7  | 74.8  | 88.3  | 84.3  | 91.7  | 76.8  | 92.4  | 85.5  | 92.2  | 93.8  | 78.9  |
| Eif3j1    | 13.0  | 11.4  | 14.6  | 21.3  | 16.8  | 12.2  | 14.2  | 12.9  | 16.3  | 24.0  | 18.4  | 20.6  |
| Eif3j2    | 9.3   | 11.2  | 7.8   | 4.7   | 5.9   | 8.5   | 11.1  | 8.8   | 6.2   | 2.8   | 10.9  | 7.6   |
| Eif3k     | 150.6 | 125.6 | 119.2 | 144.0 | 116.1 | 149.8 | 125.9 | 146.7 | 113.5 | 135.4 | 141.2 | 127.8 |
| Eif3l     | 81.6  | 71.3  | 65.1  | 79.4  | 68.3  | 76.0  | 77.0  | 79.0  | 67.9  | 76.9  | 81.8  | 74.3  |
| Eif3m     | 87.7  | 74.9  | 58.6  | 67.5  | 70.9  | 71.5  | 58.9  | 63.0  | 74.2  | 95.7  | 77.1  | 78.3  |
| Eif4a1    | 288.3 | 255.0 | 229.3 | 275.6 | 295.0 | 230.8 | 277.9 | 288.1 | 260.9 | 293.3 | 304.1 | 278.6 |
| Eif4a2    | 160.1 | 162.3 | 170.6 | 126.9 | 124.7 | 168.0 | 123.0 | 115.7 | 159.0 | 187.8 | 176.4 | 196.5 |
| Eif4a3    | 41.2  | 43.8  | 41.7  | 40.3  | 41.7  | 36.8  | 47.6  | 46.5  | 44.4  | 41.9  | 46.0  | 46.4  |
| Eif4b     | 98.8  | 86.2  | 97.1  | 85.5  | 81.5  | 94.9  | 90.8  | 104.4 | 86.9  | 97.9  | 109.2 | 110.1 |
| Eif4e     | 17.4  | 15.9  | 14.7  | 18.6  | 16.7  | 15.4  | 18.2  | 16.6  | 16.1  | 19.8  | 21.0  | 18.4  |
| Eif4e2    | 27.5  | 20.9  | 25.4  | 27.6  | 25.0  | 22.6  | 28.9  | 31.3  | 26.1  | 26.3  | 31.4  | 30.0  |
| Eif4e3    | 4.2   | 4.8   | 5.1   | 7.9   | 5.4   | 4.9   | 2.8   | 2.5   | 2.0   | 1.7   | 2.0   | 2.4   |
| Eif4ebp1  | 71.5  | 48.9  | 37.3  | 66.2  | 46.1  | 72.2  | 53.7  | 82.3  | 77.1  | 43.9  | 69.0  | 45.8  |
| Eif4ebp2  | 2.9   | 4.6   | 5.1   | 3.8   | 4.6   | 3.6   | 4.5   | 4.1   | 4.7   | 3.9   | 4.0   | 3.8   |
| Eif4ebp3  | 2.2   | 2.4   | 2.3   | 2.1   | 2.0   | 2.6   | 1.6   | 2.2   | 1.9   | 2.0   | 1.5   | 2.1   |
| Eif4enif1 | 6.9   | 8.2   | 8.8   | 7.4   | 6.1   | 7.2   | 8.1   | 6.8   | 6.9   | 6.0   | 7.1   | 7.7   |
| Eif4g1    | 124.7 | 107.8 | 99.0  | 135.3 | 106.5 | 118.2 | 127.8 | 104.1 | 100.2 | 101.7 | 117.7 | 105.1 |
| Eif4g2    | 77.4  | 74.5  | 67.2  | 80.6  | 79.6  | 78.2  | 74.0  | 76.9  | 77.0  | 79.7  | 85.7  | 73.5  |
| Eif4g3    | 11.6  | 12.4  | 13.0  | 12.3  | 11.2  | 13.0  | 14.9  | 10.2  | 9.5   | 10.8  | 11.8  | 10.6  |
| Eif4h     | 78.8  | 71.5  | 61.0  | 79.7  | 66.9  | 77.7  | 69.0  | 67.0  | 71.9  | 75.9  | 69.2  | 69.1  |
| Eif5      | 45.4  | 37.5  | 36.1  | 48.7  | 37.6  | 45.0  | 36.5  | 33.4  | 38.7  | 41.6  | 43.0  | 40.6  |
| Eif5a     | 183.3 | 150.3 | 142.9 | 196.4 | 187.1 | 173.1 | 193.3 | 177.0 | 153.8 | 170.7 | 174.2 | 152.2 |
| Eif5a2    | 4.7   | 5.2   | 6.3   | 6.7   | 5.2   | 6.6   | 5.6   | 5.5   | 5.8   | 5.6   | 5.9   | 6.8   |
| Eif5b     | 12.6  | 13.1  | 15.9  | 17.9  | 13.8  | 13.9  | 15.4  | 14.1  | 9.7   | 12.1  | 14.5  | 16.2  |
| Eif6      | 32.6  | 27.1  | 21.7  | 36.0  | 33.1  | 27.9  | 30.2  | 26.6  | 29.7  | 31.2  | 28.4  | 24.9  |
| Elac1     | 2.0   | 2.1   | 2.5   | 2.4   | 2.0   | 2.7   | 2.5   | 2.2   | 2.5   | 2.1   | 2.0   | 2.5   |
| Elac2     | 6.8   | 7.1   | 6.0   | 5.8   | 5.6   | 5.9   | 6.3   | 6.1   | 4.9   | 6.3   | 6.2   | 5.7   |

Online Table 1

|         |      |      |      |      |       |      |       |      |      |      |      |      |
|---------|------|------|------|------|-------|------|-------|------|------|------|------|------|
| Elavl1  | 10.2 | 10.4 | 10.3 | 12.1 | 11.8  | 11.1 | 11.9  | 11.0 | 10.3 | 10.6 | 13.1 | 10.8 |
| Elavl2  | 0.1  | 0.0  | 0.0  | 0.1  | 0.0   | 0.0  | 0.0   | 0.0  | 0.0  | 0.1  | 0.0  | 0.0  |
| Elavl3  | 0.0  | 0.0  | 0.0  | 0.0  | 0.0   | 0.0  | 0.0   | 0.0  | 0.0  | 0.0  | 0.0  | 0.0  |
| Elavl4  | 0.0  | 0.0  | 0.0  | 0.0  | 0.0   | 0.0  | 0.0   | 0.0  | 0.0  | 0.0  | 0.0  | 0.0  |
| Elf1    | 11.2 | 11.8 | 15.5 | 10.9 | 12.3  | 9.8  | 12.8  | 13.0 | 13.5 | 10.6 | 12.4 | 14.0 |
| Elf2    | 17.3 | 18.8 | 20.0 | 18.5 | 19.3  | 19.0 | 15.8  | 17.1 | 17.5 | 15.3 | 17.4 | 17.7 |
| Elf4    | 1.9  | 2.8  | 3.2  | 2.2  | 3.0   | 1.5  | 3.1   | 3.2  | 3.0  | 2.8  | 3.0  | 2.6  |
| Elf5    | 0.0  | 0.1  | 0.0  | 0.1  | 0.1   | 0.2  | 0.0   | 0.0  | 0.0  | 0.1  | 0.0  | 0.0  |
| Elfn1   | 0.4  | 0.5  | 0.7  | 0.6  | 0.6   | 0.4  | 0.8   | 1.0  | 0.8  | 0.6  | 0.7  | 0.7  |
| Elfn2   | 0.0  | 0.0  | 0.0  | 0.0  | 0.0   | 0.0  | 0.0   | 0.0  | 0.0  | 0.0  | 0.0  | 0.0  |
| Elk1    | 4.4  | 4.4  | 5.1  | 4.5  | 4.5   | 4.3  | 5.0   | 5.8  | 5.0  | 5.0  | 5.6  | 4.3  |
| Elk3    | 11.7 | 10.6 | 11.0 | 13.8 | 13.6  | 12.8 | 14.9  | 11.0 | 10.6 | 10.5 | 11.2 | 10.3 |
| Elk4    | 7.4  | 9.0  | 9.8  | 8.4  | 8.4   | 7.4  | 9.4   | 9.3  | 7.9  | 7.3  | 8.0  | 8.2  |
| Ell     | 4.0  | 4.8  | 4.7  | 4.6  | 4.8   | 4.7  | 4.9   | 3.8  | 4.2  | 5.0  | 4.5  | 3.8  |
| Ell2    | 12.4 | 10.3 | 10.6 | 15.8 | 18.6  | 10.2 | 13.2  | 9.6  | 10.1 | 11.2 | 12.2 | 14.7 |
| Ell3    | 0.2  | 0.2  | 0.4  | 0.5  | 0.3   | 0.3  | 0.2   | 0.4  | 0.3  | 0.2  | 0.3  | 0.3  |
| Elmo1   | 1.1  | 1.0  | 1.1  | 2.3  | 3.6   | 0.8  | 1.0   | 0.9  | 0.7  | 0.5  | 0.6  | 0.4  |
| Elmo2   | 15.3 | 15.2 | 13.3 | 13.7 | 14.1  | 16.5 | 14.3  | 12.4 | 14.1 | 14.7 | 13.0 | 12.1 |
| Elmo3   | 0.5  | 0.6  | 1.0  | 0.3  | 0.4   | 0.6  | 0.3   | 0.4  | 0.6  | 0.8  | 0.8  | 0.7  |
| Elmod1  | 0.2  | 0.0  | 0.0  | 0.2  | 0.0   | 0.0  | 0.0   | 0.0  | 0.0  | 0.0  | 0.0  | 0.0  |
| Elmod2  | 6.1  | 6.6  | 6.7  | 6.0  | 6.3   | 6.3  | 5.3   | 6.4  | 6.3  | 7.9  | 7.3  | 7.8  |
| Elmod3  | 2.7  | 3.3  | 2.8  | 2.8  | 2.4   | 2.8  | 2.2   | 3.1  | 2.8  | 2.8  | 2.1  | 2.4  |
| Elmsan1 | 2.9  | 3.6  | 3.9  | 2.7  | 3.0   | 2.5  | 3.8   | 3.9  | 3.4  | 3.0  | 3.3  | 3.5  |
| Eln     | 1.4  | 1.2  | 3.9  | 0.2  | 0.2   | 0.1  | 0.4   | 8.7  | 1.2  | 0.5  | 0.7  | 1.6  |
| Elof1   | 21.9 | 20.6 | 21.1 | 24.0 | 22.6  | 23.6 | 20.7  | 22.2 | 20.6 | 21.9 | 25.6 | 22.1 |
| Elovl1  | 28.1 | 27.7 | 27.2 | 31.7 | 29.3  | 24.3 | 38.2  | 43.4 | 40.8 | 26.4 | 35.0 | 29.6 |
| Elovl2  | 0.0  | 0.0  | 0.0  | 0.0  | 0.0   | 0.0  | 0.0   | 0.0  | 0.0  | 0.0  | 0.0  | 0.0  |
| Elovl4  | 0.6  | 0.4  | 0.4  | 0.4  | 0.5   | 0.5  | 0.5   | 0.4  | 0.3  | 0.2  | 0.3  | 0.4  |
| Elovl5  | 25.2 | 28.7 | 31.5 | 23.7 | 25.7  | 30.0 | 28.4  | 28.0 | 27.2 | 23.8 | 31.8 | 21.8 |
| Elovl6  | 3.5  | 4.6  | 4.0  | 1.7  | 2.8   | 1.8  | 7.9   | 9.4  | 6.9  | 2.5  | 8.8  | 2.4  |
| Elovl7  | 0.1  | 0.0  | 0.0  | 0.1  | 0.1   | 0.1  | 0.1   | 0.0  | 0.0  | 0.1  | 0.1  | 0.0  |
| Elp2    | 27.2 | 27.3 | 22.9 | 25.0 | 23.0  | 28.4 | 22.9  | 23.0 | 21.3 | 25.6 | 25.4 | 22.3 |
| Elp3    | 25.2 | 23.6 | 20.9 | 26.3 | 20.0  | 24.6 | 20.9  | 23.0 | 20.7 | 21.8 | 22.1 | 22.1 |
| Elp4    | 3.6  | 3.9  | 3.6  | 3.1  | 3.2   | 3.1  | 2.8   | 3.2  | 3.3  | 3.5  | 3.4  | 3.2  |
| Elp5    | 26.6 | 24.8 | 21.3 | 25.1 | 22.8  | 28.7 | 22.7  | 25.7 | 23.0 | 24.4 | 27.2 | 22.8 |
| Elp6    | 2.5  | 1.5  | 1.3  | 1.7  | 1.9   | 1.8  | 1.6   | 1.7  | 1.6  | 1.5  | 1.7  | 2.0  |
| Eltd1   | 1.0  | 0.2  | 0.7  | 0.5  | 0.2   | 0.2  | 0.8   | 1.4  | 1.0  | 0.2  | 0.3  | 0.2  |
| Emb     | 3.1  | 9.2  | 15.0 | 5.7  | 8.6   | 0.8  | 6.0   | 7.3  | 8.9  | 10.5 | 7.6  | 15.0 |
| Emc1    | 13.7 | 13.3 | 12.3 | 15.7 | 13.3  | 15.1 | 12.9  | 11.9 | 11.9 | 11.5 | 11.1 | 9.9  |
| Emc10   | 25.3 | 21.8 | 23.8 | 28.6 | 25.7  | 26.9 | 25.7  | 25.6 | 26.9 | 22.6 | 21.4 | 20.5 |
| Emc2    | 41.8 | 40.3 | 43.1 | 48.8 | 39.0  | 39.1 | 39.0  | 40.7 | 36.9 | 44.9 | 48.2 | 49.0 |
| Emc3    | 54.9 | 50.4 | 47.7 | 59.9 | 51.1  | 52.6 | 54.6  | 55.3 | 54.0 | 52.8 | 56.5 | 55.5 |
| Emc4    | 39.9 | 35.9 | 32.0 | 45.3 | 38.9  | 46.2 | 37.9  | 38.8 | 38.8 | 44.3 | 38.4 | 35.7 |
| Emc6    | 19.5 | 17.1 | 14.4 | 17.7 | 19.0  | 19.8 | 17.0  | 17.1 | 17.6 | 20.9 | 19.3 | 15.8 |
| Emc7    | 82.8 | 72.4 | 63.8 | 96.2 | 69.1  | 84.2 | 69.3  | 57.7 | 69.8 | 67.4 | 69.3 | 76.4 |
| Emc8    | 7.0  | 5.4  | 5.2  | 7.7  | 6.4   | 5.6  | 6.9   | 5.9  | 5.7  | 6.2  | 6.4  | 6.3  |
| Emc9    | 11.2 | 10.0 | 10.1 | 9.0  | 8.3   | 10.9 | 9.3   | 7.9  | 10.7 | 8.3  | 9.4  | 11.7 |
| Emcn    | 7.6  | 1.5  | 2.2  | 6.0  | 2.7   | 5.5  | 2.1   | 3.7  | 1.4  | 0.7  | 1.8  | 0.8  |
| Emd     | 24.7 | 25.0 | 23.9 | 21.7 | 22.6  | 25.2 | 24.5  | 21.5 | 22.4 | 21.2 | 26.3 | 22.5 |
| Eme1    | 3.3  | 3.4  | 3.3  | 3.1  | 3.5   | 2.8  | 4.4   | 3.7  | 3.8  | 3.2  | 4.0  | 3.6  |
| Eme2    | 6.8  | 7.0  | 6.3  | 7.0  | 5.0   | 7.8  | 5.1   | 4.6  | 5.0  | 5.7  | 5.8  | 4.9  |
| Emg1    | 28.7 | 25.5 | 19.6 | 24.7 | 23.0  | 26.8 | 20.2  | 18.9 | 23.1 | 25.8 | 21.5 | 20.7 |
| Emid1   | 0.1  | 0.2  | 0.3  | 0.1  | 0.2   | 0.1  | 0.1   | 0.2  | 0.1  | 0.2  | 0.1  | 0.1  |
| Emilin1 | 58.6 | 72.5 | 87.5 | 72.5 | 107.6 | 75.5 | 107.0 | 82.5 | 98.3 | 69.3 | 54.6 | 83.3 |
| Emilin2 | 1.7  | 2.0  | 2.2  | 2.7  | 7.2   | 0.6  | 3.1   | 2.7  | 2.5  | 7.8  | 5.4  | 4.4  |
| Emilin3 | 0.1  | 0.0  | 0.0  | 0.1  | 0.0   | 0.0  | 0.0   | 0.0  | 0.0  | 0.0  | 0.0  | 0.0  |
| Eml1    | 7.6  | 7.7  | 7.6  | 6.5  | 6.3   | 9.9  | 7.4   | 8.1  | 8.3  | 12.0 | 9.5  | 9.9  |

Online Table 1

|          |       |       |       |       |       |       |       |       |       |       |       |       |
|----------|-------|-------|-------|-------|-------|-------|-------|-------|-------|-------|-------|-------|
| Eml2     | 7.7   | 6.9   | 6.6   | 8.7   | 7.3   | 9.5   | 5.2   | 4.9   | 5.3   | 9.5   | 5.5   | 7.0   |
| Eml3     | 8.1   | 9.8   | 9.3   | 7.8   | 8.2   | 8.2   | 9.4   | 8.3   | 9.7   | 8.9   | 7.1   | 8.4   |
| Eml4     | 7.8   | 11.2  | 11.9  | 7.7   | 11.8  | 6.7   | 12.4  | 12.1  | 10.9  | 9.4   | 10.0  | 9.7   |
| Eml5     | 0.8   | 0.9   | 1.8   | 1.5   | 1.0   | 1.6   | 1.3   | 1.0   | 1.0   | 1.2   | 1.6   | 1.9   |
| Eml6     | 1.4   | 1.1   | 1.2   | 1.2   | 1.0   | 1.4   | 0.9   | 1.0   | 0.8   | 0.9   | 1.0   | 1.2   |
| Emp1     | 154.3 | 135.0 | 173.3 | 88.5  | 188.1 | 109.6 | 272.5 | 232.2 | 282.2 | 182.4 | 240.4 | 275.2 |
| Emp2     | 28.8  | 23.0  | 21.9  | 37.4  | 26.0  | 32.9  | 27.5  | 20.6  | 24.2  | 25.0  | 26.8  | 23.8  |
| Emp3     | 133.4 | 109.3 | 113.0 | 171.2 | 143.4 | 139.3 | 174.4 | 178.7 | 151.5 | 140.9 | 155.4 | 138.2 |
| Emr1     | 6.0   | 0.0   | 0.3   | 42.8  | 78.6  | 0.1   | 8.2   | 1.3   | 1.6   | 4.6   | 1.6   | 3.5   |
| Emr4     | 0.0   | 0.0   | 0.0   | 0.0   | 0.0   | 0.0   | 0.0   | 0.0   | 0.0   | 0.0   | 0.0   | 0.0   |
| Emx2     | 3.4   | 0.6   | 0.8   | 4.1   | 1.4   | 4.7   | 1.0   | 0.4   | 1.0   | 1.9   | 1.8   | 0.8   |
| Emx2os   | 0.6   | 0.2   | 0.3   | 0.7   | 0.5   | 0.6   | 0.4   | 0.3   | 0.4   | 0.5   | 0.4   | 0.3   |
| En1      | 0.4   | 0.3   | 0.1   | 0.8   | 0.1   | 0.5   | 0.5   | 0.3   | 0.5   | 0.4   | 0.6   | 0.4   |
| En2      | 0.1   | 0.0   | 0.0   | 0.2   | 0.0   | 0.0   | 0.1   | 0.0   | 0.0   | 0.0   | 0.0   | 0.0   |
| Enah     | 4.7   | 4.1   | 5.2   | 4.1   | 3.2   | 3.6   | 4.6   | 3.7   | 3.3   | 6.9   | 7.1   | 6.3   |
| Enc1     | 43.1  | 47.4  | 55.5  | 32.7  | 45.3  | 27.0  | 36.5  | 60.1  | 36.5  | 50.6  | 37.3  | 47.3  |
| Endod1   | 14.4  | 7.4   | 6.1   | 20.0  | 19.6  | 13.5  | 16.3  | 6.1   | 9.6   | 11.4  | 12.1  | 12.0  |
| Endog    | 1.5   | 1.7   | 1.3   | 2.1   | 2.1   | 1.6   | 2.1   | 2.2   | 2.8   | 2.7   | 1.5   | 1.8   |
| Endou    | 0.8   | 0.8   | 1.0   | 0.7   | 0.7   | 1.2   | 1.2   | 0.9   | 0.6   | 0.7   | 0.8   | 1.2   |
| Endov    | 1.5   | 1.5   | 1.6   | 2.2   | 1.7   | 2.1   | 1.7   | 1.8   | 1.7   | 1.3   | 1.7   | 1.3   |
| Eng      | 45.8  | 51.5  | 49.1  | 64.9  | 62.0  | 62.9  | 72.0  | 45.0  | 51.3  | 31.9  | 38.0  | 34.6  |
| Engase   | 0.7   | 0.8   | 1.0   | 0.8   | 1.0   | 0.7   | 0.6   | 0.9   | 0.9   | 0.6   | 0.7   | 0.4   |
| Enho     | 7.1   | 5.5   | 3.3   | 11.8  | 4.8   | 11.2  | 3.9   | 1.8   | 2.6   | 4.0   | 2.4   | 4.8   |
| Enkd1    | 2.5   | 2.5   | 2.8   | 2.2   | 2.3   | 3.1   | 3.0   | 2.5   | 1.9   | 1.9   | 2.2   | 1.4   |
| Enkur    | 0.1   | 0.0   | 0.1   | 0.3   | 0.2   | 0.1   | 0.2   | 0.1   | 0.1   | 0.0   | 0.1   | 0.1   |
| Eno1     | 168.6 | 149.9 | 108.5 | 186.9 | 190.6 | 172.1 | 174.7 | 159.6 | 177.9 | 169.7 | 183.2 | 155.7 |
| Eno2     | 2.0   | 2.9   | 3.0   | 1.4   | 2.2   | 2.9   | 2.0   | 2.0   | 2.5   | 4.1   | 2.6   | 2.8   |
| Eno3     | 1.4   | 1.5   | 1.4   | 1.9   | 1.3   | 1.5   | 1.7   | 1.6   | 2.0   | 2.7   | 2.0   | 1.6   |
| Eno4     | 0.0   | 0.0   | 0.0   | 0.1   | 0.1   | 0.0   | 0.0   | 0.0   | 0.0   | 0.0   | 0.0   | 0.0   |
| Enoph1   | 8.2   | 7.4   | 7.2   | 8.2   | 7.7   | 9.5   | 8.8   | 7.2   | 8.4   | 8.3   | 9.1   | 9.0   |
| Enox1    | 0.6   | 0.8   | 1.2   | 0.7   | 0.9   | 0.8   | 1.0   | 1.0   | 0.7   | 0.8   | 0.6   | 0.9   |
| Enox2    | 6.4   | 6.9   | 6.7   | 6.5   | 6.0   | 6.1   | 5.4   | 6.1   | 6.2   | 4.8   | 6.7   | 6.6   |
| Enpep    | 0.1   | 0.1   | 0.1   | 0.0   | 0.1   | 0.1   | 0.1   | 0.5   | 0.2   | 0.6   | 0.4   | 0.3   |
| Enpp1    | 7.8   | 10.1  | 11.2  | 6.5   | 8.4   | 9.1   | 10.6  | 5.4   | 11.4  | 13.0  | 7.4   | 16.3  |
| Enpp2    | 0.7   | 0.3   | 0.3   | 0.8   | 0.7   | 0.8   | 0.1   | 0.2   | 0.0   | 0.1   | 0.1   | 0.2   |
| Enpp3    | 0.1   | 0.2   | 0.4   | 0.1   | 0.2   | 0.0   | 0.4   | 0.9   | 0.4   | 0.1   | 0.3   | 0.3   |
| Enpp4    | 3.0   | 2.3   | 1.8   | 3.0   | 2.0   | 3.2   | 1.4   | 2.2   | 1.4   | 2.5   | 2.2   | 1.8   |
| Enpp5    | 43.6  | 34.6  | 31.5  | 41.9  | 24.3  | 51.4  | 20.9  | 17.0  | 15.9  | 30.1  | 26.9  | 29.4  |
| Enpp6    | 0.3   | 0.2   | 0.3   | 0.1   | 0.1   | 0.0   | 0.1   | 0.1   | 0.0   | 0.2   | 0.1   | 0.1   |
| Ensa     | 66.6  | 59.4  | 50.8  | 74.1  | 59.4  | 62.8  | 58.9  | 50.2  | 55.3  | 59.1  | 66.1  | 59.2  |
| Enthd1   | 0.0   | 0.0   | 0.0   | 0.0   | 0.0   | 0.0   | 0.1   | 0.0   | 0.0   | 0.0   | 0.0   | 0.0   |
| Enthd2   | 3.7   | 3.8   | 3.5   | 3.6   | 4.0   | 4.1   | 3.5   | 3.3   | 3.8   | 3.2   | 3.6   | 3.2   |
| Entpd1   | 0.7   | 0.2   | 0.2   | 1.3   | 0.7   | 0.4   | 0.2   | 0.2   | 0.1   | 0.2   | 0.2   | 0.1   |
| Entpd2   | 3.1   | 5.5   | 11.6  | 2.2   | 4.3   | 2.4   | 3.5   | 20.2  | 5.8   | 2.4   | 2.5   | 3.3   |
| Entpd3   | 0.0   | 0.1   | 0.0   | 0.1   | 0.0   | 0.0   | 0.0   | 0.0   | 0.0   | 0.0   | 0.0   | 0.0   |
| Entpd4   | 14.6  | 13.2  | 12.6  | 15.7  | 13.2  | 14.1  | 12.3  | 13.4  | 12.1  | 15.0  | 14.1  | 14.1  |
| Entpd5   | 8.0   | 7.4   | 6.4   | 8.6   | 8.0   | 9.7   | 6.2   | 6.6   | 5.8   | 6.9   | 6.9   | 6.7   |
| Entpd6   | 3.0   | 3.6   | 3.7   | 3.7   | 3.7   | 3.2   | 2.9   | 4.1   | 3.8   | 3.5   | 3.3   | 3.2   |
| Entpd7   | 1.7   | 1.8   | 1.5   | 1.4   | 2.4   | 1.3   | 1.9   | 2.0   | 2.0   | 1.8   | 1.7   | 1.5   |
| Eny2     | 11.0  | 8.6   | 8.8   | 9.3   | 8.1   | 8.4   | 9.6   | 11.4  | 9.2   | 12.1  | 12.3  | 9.3   |
| Eogt     | 11.9  | 12.5  | 11.8  | 11.2  | 11.5  | 12.8  | 12.7  | 13.6  | 13.5  | 8.9   | 14.2  | 11.5  |
| Eomes    | 0.0   | 0.0   | 0.0   | 0.1   | 0.0   | 0.0   | 0.0   | 0.0   | 0.0   | 0.0   | 0.1   | 0.0   |
| Ep300    | 2.8   | 3.1   | 3.2   | 3.1   | 3.1   | 3.0   | 3.2   | 2.7   | 2.9   | 2.5   | 2.7   | 2.6   |
| Ep400    | 3.4   | 4.1   | 4.4   | 3.4   | 4.0   | 3.3   | 4.7   | 3.8   | 4.0   | 3.4   | 3.6   | 3.0   |
| Epas1    | 23.1  | 27.6  | 28.9  | 32.2  | 35.1  | 22.1  | 33.0  | 17.7  | 22.3  | 16.8  | 17.8  | 21.9  |
| Epb4.1   | 5.0   | 4.3   | 4.4   | 7.6   | 5.2   | 5.7   | 4.0   | 4.4   | 3.2   | 4.5   | 4.6   | 4.2   |
| Epb4.1l1 | 11.2  | 10.3  | 9.6   | 12.3  | 8.4   | 13.7  | 12.2  | 7.6   | 8.9   | 7.7   | 9.8   | 9.3   |

Online Table 1

|           |       |       |       |       |       |       |       |       |       |       |       |       |
|-----------|-------|-------|-------|-------|-------|-------|-------|-------|-------|-------|-------|-------|
| Epb4.1I2  | 84.0  | 81.5  | 90.3  | 105.1 | 88.8  | 85.1  | 108.7 | 77.2  | 88.5  | 66.0  | 84.7  | 98.4  |
| Epb4.1I3  | 15.5  | 13.4  | 12.0  | 19.8  | 12.6  | 25.3  | 17.4  | 15.3  | 16.7  | 13.6  | 18.9  | 16.9  |
| Epb4.1I4a | 0.7   | 0.3   | 0.3   | 0.2   | 0.2   | 0.1   | 0.3   | 0.4   | 0.2   | 1.0   | 1.1   | 0.5   |
| Epb4.1I4b | 1.1   | 0.7   | 1.1   | 1.1   | 0.9   | 0.9   | 1.2   | 1.2   | 2.3   | 1.4   | 1.8   | 1.1   |
| Epb4.1I5  | 1.8   | 1.8   | 1.4   | 1.1   | 1.0   | 1.5   | 1.7   | 1.3   | 1.8   | 2.6   | 2.1   | 2.0   |
| Epb4.2    | 0.0   | 0.1   | 0.0   | 0.0   | 0.0   | 0.0   | 0.0   | 0.0   | 0.0   | 0.0   | 0.0   | 0.0   |
| Epb4.9    | 1.1   | 0.8   | 0.7   | 1.6   | 0.5   | 1.4   | 0.7   | 0.4   | 0.4   | 0.3   | 0.5   | 0.5   |
| Epc1      | 4.8   | 4.8   | 5.1   | 4.4   | 5.3   | 5.2   | 5.8   | 5.9   | 5.4   | 5.4   | 6.2   | 5.8   |
| Epc2      | 5.1   | 5.2   | 7.6   | 5.3   | 5.8   | 5.3   | 5.8   | 6.9   | 6.0   | 5.8   | 7.3   | 7.2   |
| Epdr1     | 37.2  | 28.5  | 23.8  | 30.4  | 24.0  | 34.9  | 23.5  | 22.7  | 22.7  | 26.0  | 27.5  | 26.4  |
| Epg5      | 6.2   | 7.0   | 6.1   | 6.0   | 5.9   | 7.1   | 5.6   | 4.8   | 5.4   | 5.4   | 5.5   | 5.4   |
| Epgn      | 0.0   | 0.0   | 0.0   | 0.0   | 0.0   | 0.1   | 0.0   | 0.1   | 0.0   | 0.0   | 0.0   | 0.0   |
| Epha1     | 0.5   | 0.4   | 0.3   | 0.2   | 0.3   | 0.3   | 0.5   | 0.6   | 0.6   | 5.8   | 2.5   | 0.8   |
| Epha2     | 11.3  | 7.0   | 4.7   | 9.6   | 8.4   | 8.6   | 10.3  | 3.3   | 6.9   | 23.4  | 14.2  | 8.6   |
| Epha3     | 0.3   | 0.3   | 0.4   | 0.0   | 0.1   | 0.0   | 0.1   | 0.4   | 0.3   | 1.2   | 1.0   | 0.6   |
| Epha4     | 2.2   | 2.3   | 4.0   | 3.1   | 4.8   | 6.2   | 5.2   | 4.9   | 5.0   | 4.3   | 7.2   | 4.0   |
| Epha5     | 0.0   | 0.0   | 0.0   | 0.0   | 0.0   | 0.0   | 0.0   | 0.0   | 0.0   | 0.0   | 0.0   | 0.0   |
| Epha6     | 0.0   | 0.0   | 0.0   | 0.0   | 0.0   | 0.0   | 0.0   | 0.0   | 0.0   | 0.0   | 0.0   | 0.0   |
| Epha7     | 0.6   | 0.7   | 1.7   | 0.3   | 0.8   | 0.3   | 1.2   | 1.5   | 1.1   | 1.1   | 1.1   | 1.7   |
| Ephb1     | 0.0   | 0.0   | 0.0   | 0.0   | 0.0   | 0.0   | 0.0   | 0.1   | 0.0   | 0.0   | 0.0   | 0.0   |
| Ephb2     | 2.2   | 3.1   | 4.0   | 1.9   | 3.0   | 2.2   | 3.7   | 4.5   | 4.8   | 6.5   | 5.6   | 4.6   |
| Ephb3     | 3.8   | 5.6   | 6.7   | 3.5   | 3.9   | 4.3   | 4.0   | 8.7   | 6.8   | 6.6   | 5.6   | 4.7   |
| Ephb4     | 7.3   | 9.4   | 9.5   | 7.2   | 9.6   | 9.7   | 12.7  | 12.0  | 12.4  | 13.1  | 11.1  | 9.8   |
| Ephb6     | 3.0   | 2.4   | 2.4   | 2.2   | 2.2   | 3.0   | 3.2   | 3.4   | 2.8   | 3.1   | 2.4   | 2.8   |
| Ephx1     | 354.3 | 307.6 | 235.2 | 416.4 | 273.0 | 464.3 | 299.3 | 225.1 | 214.1 | 315.2 | 309.7 | 293.3 |
| Ephx2     | 14.0  | 14.4  | 14.8  | 15.3  | 12.9  | 21.7  | 10.2  | 13.8  | 11.7  | 16.0  | 18.6  | 21.2  |
| Ephx3     | 0.0   | 0.0   | 0.0   | 0.0   | 0.0   | 0.1   | 0.0   | 0.0   | 0.0   | 0.0   | 0.1   | 0.0   |
| Ephx4     | 0.1   | 0.2   | 0.0   | 0.1   | 0.1   | 0.1   | 0.0   | 0.2   | 0.1   | 0.0   | 0.0   | 0.1   |
| Epm2a     | 4.2   | 3.2   | 2.5   | 3.6   | 2.8   | 4.2   | 3.7   | 1.8   | 3.2   | 2.4   | 2.8   | 3.1   |
| Epm2aip1  | 5.2   | 5.9   | 7.1   | 5.4   | 6.0   | 5.3   | 6.2   | 7.1   | 5.9   | 6.7   | 6.9   | 6.9   |
| Epn1      | 22.6  | 22.3  | 19.5  | 24.8  | 22.0  | 22.1  | 20.3  | 19.2  | 18.0  | 16.1  | 16.9  | 16.3  |
| Epn2      | 14.5  | 18.1  | 19.1  | 13.6  | 13.1  | 15.2  | 15.7  | 15.8  | 18.4  | 14.5  | 15.4  | 16.7  |
| Epn3      | 0.1   | 0.0   | 0.1   | 0.0   | 0.0   | 0.1   | 0.0   | 0.0   | 0.0   | 0.1   | 0.0   | 0.0   |
| Epor      | 0.3   | 0.3   | 0.3   | 0.0   | 0.1   | 0.6   | 0.1   | 0.2   | 0.1   | 0.1   | 0.1   | 0.1   |
| Eppk1     | 0.0   | 0.1   | 0.0   | 0.1   | 0.0   | 0.1   | 0.1   | 0.1   | 0.0   | 0.1   | 0.0   | 0.0   |
| Eprs      | 92.9  | 70.5  | 66.0  | 93.1  | 60.3  | 91.0  | 65.4  | 90.5  | 66.2  | 60.0  | 84.4  | 68.5  |
| Eps15     | 10.6  | 11.5  | 12.9  | 11.6  | 12.8  | 10.3  | 10.8  | 15.6  | 12.0  | 10.5  | 12.9  | 13.0  |
| Eps15I1   | 11.3  | 11.9  | 12.3  | 12.5  | 12.3  | 10.5  | 13.5  | 13.3  | 12.0  | 10.7  | 12.4  | 11.6  |
| Eps8      | 7.6   | 7.8   | 9.1   | 5.2   | 6.8   | 4.5   | 8.3   | 9.6   | 8.5   | 17.2  | 11.3  | 12.7  |
| Eps8I1    | 0.9   | 0.7   | 0.5   | 0.9   | 0.5   | 0.8   | 0.7   | 0.8   | 0.6   | 0.3   | 0.8   | 0.5   |
| Eps8I2    | 0.6   | 0.6   | 0.3   | 0.5   | 0.2   | 1.2   | 0.6   | 0.2   | 0.4   | 2.5   | 1.5   | 1.3   |
| Eps8I3    | 0.1   | 0.0   | 0.0   | 0.0   | 0.0   | 0.0   | 0.0   | 0.0   | 0.0   | 0.0   | 0.0   | 0.0   |
| Epsti1    | 0.2   | 0.0   | 0.1   | 1.0   | 1.3   | 0.0   | 0.2   | 0.1   | 0.1   | 0.1   | 0.0   | 0.0   |
| Ept1      | 7.4   | 6.4   | 6.0   | 7.6   | 6.3   | 7.0   | 7.3   | 6.4   | 9.0   | 6.8   | 7.9   | 6.5   |
| Epyc      | 0.2   | 0.3   | 1.6   | 0.0   | 0.0   | 0.0   | 0.0   | 1.1   | 0.2   | 0.2   | 0.2   | 0.4   |
| Eqtn      | 0.1   | 0.0   | 0.0   | 0.0   | 0.0   | 0.1   | 0.0   | 0.0   | 0.2   | 0.0   | 0.0   | 0.0   |
| Eral1     | 6.2   | 5.8   | 5.6   | 6.7   | 5.6   | 6.4   | 4.8   | 6.4   | 5.9   | 5.7   | 4.8   | 5.0   |
| Erap1     | 9.1   | 6.2   | 7.2   | 12.3  | 13.5  | 10.2  | 6.3   | 7.0   | 6.1   | 6.8   | 6.4   | 7.6   |
| Erb2      | 2.3   | 2.6   | 2.9   | 2.1   | 2.3   | 2.5   | 3.3   | 3.5   | 3.9   | 2.9   | 2.5   | 2.5   |
| Erb2ip    | 22.6  | 24.7  | 25.1  | 25.8  | 22.9  | 23.5  | 21.9  | 23.3  | 24.3  | 25.5  | 26.9  | 29.1  |
| Erb3      | 0.1   | 0.2   | 0.1   | 0.3   | 0.2   | 0.2   | 0.1   | 0.1   | 0.1   | 0.1   | 0.2   | 0.1   |
| Erb4      | 0.1   | 0.1   | 0.0   | 0.0   | 0.0   | 0.0   | 0.0   | 0.0   | 0.0   | 0.3   | 0.1   | 0.1   |
| Erc1      | 5.4   | 6.5   | 6.7   | 4.6   | 5.9   | 4.2   | 6.5   | 6.2   | 5.5   | 4.9   | 6.1   | 6.9   |
| Erc2      | 0.2   | 0.0   | 0.1   | 0.3   | 0.1   | 0.4   | 0.0   | 0.0   | 0.0   | 0.3   | 0.2   | 0.1   |
| Ercc1     | 15.7  | 13.4  | 12.8  | 15.2  | 11.9  | 14.6  | 17.4  | 16.1  | 15.6  | 15.8  | 17.2  | 15.6  |
| Ercc2     | 3.4   | 3.5   | 3.3   | 4.3   | 4.0   | 3.6   | 3.7   | 3.9   | 3.8   | 3.8   | 3.3   | 3.2   |
| Ercc3     | 17.8  | 16.6  | 16.3  | 18.3  | 17.2  | 17.3  | 18.1  | 17.9  | 15.5  | 16.0  | 18.2  | 18.8  |

Online Table 1

|         |       |       |       |       |       |       |       |       |       |       |       |       |
|---------|-------|-------|-------|-------|-------|-------|-------|-------|-------|-------|-------|-------|
| Ercc4   | 2.1   | 2.2   | 2.1   | 2.1   | 2.0   | 1.8   | 2.0   | 2.2   | 1.8   | 2.2   | 2.0   | 2.1   |
| Ercc5   | 13.4  | 13.9  | 12.5  | 11.4  | 10.3  | 12.1  | 11.2  | 8.8   | 10.2  | 13.4  | 12.7  | 13.0  |
| Ercc6   | 3.1   | 2.7   | 2.6   | 4.4   | 3.8   | 3.6   | 3.2   | 2.8   | 2.8   | 2.8   | 3.4   | 3.0   |
| Ercc6l  | 0.7   | 1.4   | 2.3   | 0.3   | 1.9   | 0.2   | 2.2   | 1.3   | 1.7   | 1.0   | 1.7   | 1.2   |
| Ercc6l2 | 5.5   | 5.1   | 5.0   | 4.3   | 4.7   | 4.8   | 4.2   | 4.6   | 4.2   | 4.3   | 5.6   | 5.5   |
| Ercc8   | 1.0   | 1.1   | 1.0   | 0.8   | 1.1   | 1.0   | 1.1   | 0.8   | 1.0   | 1.0   | 1.1   | 1.2   |
| Erdr1   | 14.5  | 13.0  | 19.4  | 12.2  | 18.6  | 10.3  | 26.3  | 14.1  | 21.0  | 14.2  | 18.2  | 6.8   |
| Ereg    | 12.3  | 10.3  | 8.8   | 13.2  | 16.9  | 7.3   | 21.9  | 11.9  | 15.6  | 15.6  | 20.2  | 16.5  |
| Erf     | 8.0   | 9.1   | 9.4   | 7.6   | 9.5   | 8.1   | 12.1  | 12.5  | 11.2  | 7.9   | 8.4   | 8.3   |
| Erg     | 1.0   | 0.2   | 0.3   | 0.3   | 0.4   | 0.2   | 0.5   | 0.9   | 0.6   | 0.1   | 0.2   | 0.3   |
| Ergic1  | 74.6  | 59.4  | 45.6  | 82.5  | 56.6  | 77.5  | 69.8  | 44.0  | 51.0  | 59.4  | 67.7  | 52.9  |
| Ergic2  | 24.0  | 25.0  | 24.1  | 22.8  | 24.2  | 20.1  | 24.6  | 25.8  | 25.4  | 25.1  | 27.5  | 26.2  |
| Ergic3  | 83.8  | 76.0  | 81.2  | 92.6  | 78.8  | 92.4  | 78.1  | 80.6  | 71.2  | 83.0  | 73.0  | 81.3  |
| Erh     | 69.1  | 60.5  | 60.4  | 70.5  | 66.5  | 66.0  | 63.0  | 68.1  | 61.3  | 71.5  | 76.0  | 67.8  |
| Eri1    | 4.6   | 5.8   | 6.5   | 4.0   | 6.1   | 4.8   | 5.6   | 5.2   | 5.3   | 5.3   | 5.4   | 5.2   |
| Eri2    | 2.1   | 2.9   | 3.2   | 1.6   | 3.2   | 1.9   | 3.1   | 2.6   | 2.8   | 2.4   | 2.6   | 2.4   |
| Eri3    | 26.1  | 24.9  | 24.0  | 26.3  | 22.8  | 27.4  | 26.4  | 28.9  | 26.6  | 27.3  | 26.3  | 26.3  |
| Erich1  | 10.5  | 9.5   | 11.0  | 11.8  | 8.5   | 11.1  | 9.7   | 7.4   | 7.4   | 8.3   | 10.1  | 10.7  |
| Erlec1  | 7.4   | 6.2   | 6.9   | 9.6   | 7.4   | 7.7   | 7.8   | 8.0   | 6.4   | 8.7   | 7.4   | 10.4  |
| Erlin1  | 7.9   | 8.0   | 7.7   | 8.2   | 8.6   | 8.5   | 8.0   | 6.6   | 7.3   | 6.2   | 7.0   | 7.4   |
| Erlin2  | 27.2  | 25.0  | 22.3  | 30.6  | 24.6  | 30.0  | 24.5  | 22.8  | 24.2  | 22.7  | 24.2  | 24.6  |
| Ermap   | 0.0   | 0.0   | 0.0   | 0.1   | 0.0   | 0.0   | 0.0   | 0.0   | 0.0   | 0.0   | 0.1   | 0.0   |
| Ermp1   | 2.4   | 2.1   | 3.2   | 1.9   | 2.6   | 2.5   | 2.1   | 2.3   | 2.5   | 2.5   | 2.3   | 2.5   |
| Ern1    | 8.2   | 8.9   | 7.8   | 9.0   | 10.4  | 9.1   | 13.1  | 7.5   | 8.4   | 8.4   | 8.5   | 9.6   |
| Ero1l   | 44.7  | 32.5  | 22.8  | 55.6  | 32.8  | 56.8  | 33.1  | 23.3  | 31.0  | 39.2  | 39.6  | 34.5  |
| Ero1lb  | 2.9   | 2.6   | 2.8   | 3.2   | 3.7   | 3.0   | 2.6   | 2.4   | 2.4   | 2.9   | 2.6   | 2.9   |
| Erp27   | 0.1   | 0.0   | 0.0   | 0.0   | 0.1   | 0.0   | 0.0   | 0.0   | 0.0   | 0.1   | 0.0   | 0.0   |
| Erp29   | 85.5  | 72.8  | 75.3  | 105.9 | 85.3  | 81.2  | 82.7  | 82.4  | 77.0  | 78.3  | 79.8  | 81.4  |
| Erp44   | 38.5  | 37.1  | 40.6  | 44.3  | 39.5  | 37.0  | 41.8  | 40.2  | 41.7  | 40.8  | 43.0  | 47.3  |
| Errf1   | 4.6   | 5.9   | 5.3   | 3.4   | 5.3   | 4.2   | 5.8   | 4.4   | 4.8   | 8.1   | 6.6   | 5.8   |
| Erv3    | 0.0   | 0.0   | 0.0   | 0.0   | 0.0   | 0.1   | 0.0   | 0.0   | 0.0   | 0.0   | 0.0   | 0.0   |
| Esam    | 1.2   | 0.5   | 0.6   | 0.5   | 0.6   | 0.2   | 1.2   | 1.6   | 1.2   | 2.0   | 1.5   | 0.7   |
| Esco1   | 4.3   | 4.9   | 4.3   | 4.9   | 5.4   | 4.0   | 3.9   | 4.6   | 4.7   | 5.3   | 5.1   | 5.1   |
| Esco2   | 0.8   | 2.4   | 4.8   | 0.3   | 2.6   | 0.2   | 2.9   | 1.6   | 2.3   | 1.3   | 2.2   | 1.6   |
| Esd     | 496.9 | 421.5 | 238.4 | 553.6 | 382.8 | 568.8 | 253.0 | 229.7 | 190.5 | 296.2 | 268.6 | 232.6 |
| Esf1    | 11.0  | 12.1  | 11.3  | 13.3  | 10.0  | 10.8  | 10.9  | 9.3   | 8.3   | 10.3  | 13.2  | 12.6  |
| Esm1    | 4.5   | 2.6   | 2.0   | 1.9   | 0.4   | 5.5   | 1.4   | 1.1   | 1.6   | 0.6   | 0.3   | 0.8   |
| Espl1   | 0.7   | 1.0   | 1.3   | 0.3   | 1.2   | 0.5   | 1.4   | 0.8   | 1.1   | 0.5   | 0.9   | 0.6   |
| Espn    | 0.6   | 0.6   | 0.6   | 0.2   | 0.6   | 0.3   | 0.5   | 0.4   | 0.4   | 0.7   | 0.7   | 0.3   |
| Espnl   | 0.0   | 0.0   | 0.0   | 0.1   | 0.0   | 0.0   | 0.0   | 0.0   | 0.0   | 0.0   | 0.0   | 0.0   |
| Esr1    | 0.7   | 0.6   | 1.3   | 0.7   | 0.8   | 0.7   | 0.7   | 0.8   | 0.7   | 0.6   | 0.6   | 0.8   |
| Esr2    | 0.1   | 0.1   | 0.0   | 0.1   | 0.0   | 0.0   | 0.1   | 0.0   | 0.0   | 0.0   | 0.0   | 0.0   |
| Esrp2   | 1.2   | 1.3   | 0.5   | 1.0   | 1.2   | 0.8   | 2.2   | 1.2   | 2.1   | 2.6   | 2.1   | 2.2   |
| Esrra   | 7.7   | 7.3   | 5.6   | 9.5   | 8.1   | 8.8   | 7.1   | 4.9   | 7.5   | 8.1   | 6.6   | 6.4   |
| Esrrb   | 0.0   | 0.0   | 0.0   | 0.0   | 0.0   | 0.0   | 0.0   | 0.0   | 0.0   | 0.0   | 0.0   | 0.0   |
| Esrg    | 0.0   | 0.0   | 0.0   | 0.0   | 0.0   | 0.0   | 0.0   | 0.0   | 0.0   | 0.0   | 0.0   | 0.0   |
| Esyt1   | 16.1  | 16.4  | 18.8  | 24.9  | 31.5  | 16.9  | 19.7  | 23.4  | 22.2  | 17.8  | 18.0  | 15.5  |
| Esyt2   | 22.7  | 21.8  | 18.7  | 20.2  | 22.5  | 21.1  | 27.8  | 20.6  | 28.4  | 27.7  | 31.3  | 26.5  |
| Esyt3   | 0.0   | 0.0   | 0.0   | 0.0   | 0.0   | 0.1   | 0.0   | 0.0   | 0.1   | 0.3   | 0.2   | 0.2   |
| Etaa1   | 1.2   | 2.0   | 2.2   | 0.9   | 1.8   | 1.4   | 1.6   | 1.8   | 2.0   | 1.7   | 1.5   | 1.7   |
| Etf1    | 55.0  | 49.7  | 47.0  | 53.8  | 48.4  | 49.4  | 50.6  | 44.0  | 47.5  | 52.9  | 56.6  | 57.5  |
| Etfa    | 25.6  | 25.3  | 25.0  | 21.6  | 24.5  | 25.1  | 19.9  | 24.2  | 20.6  | 23.5  | 21.2  | 25.0  |
| Etfb    | 68.8  | 69.8  | 63.0  | 74.4  | 64.5  | 62.1  | 63.4  | 62.0  | 66.4  | 83.8  | 72.7  | 70.5  |
| Etdh    | 19.5  | 18.5  | 17.2  | 20.8  | 16.2  | 19.2  | 16.1  | 16.9  | 16.6  | 18.9  | 18.1  | 19.4  |
| Ethe1   | 4.3   | 5.3   | 4.9   | 5.4   | 4.0   | 6.1   | 4.5   | 5.0   | 3.8   | 4.3   | 4.6   | 3.5   |
| EtI4    | 0.9   | 0.8   | 0.9   | 0.9   | 0.8   | 1.0   | 1.1   | 0.8   | 1.2   | 0.6   | 0.9   | 1.1   |
| Etnk1   | 8.7   | 9.5   | 8.6   | 10.5  | 9.3   | 10.3  | 9.3   | 8.1   | 9.0   | 9.8   | 10.5  | 9.3   |

Online Table 1



|          |      |      |      |      |      |      |      |      |      |      |      |      |
|----------|------|------|------|------|------|------|------|------|------|------|------|------|
| Etnk2    | 0.1  | 0.6  | 0.4  | 0.2  | 0.2  | 0.2  | 0.1  | 0.2  | 0.2  | 0.1  | 0.1  | 0.0  |
| Etohd2   | 0.5  | 0.4  | 0.5  | 0.5  | 0.4  | 0.5  | 0.3  | 0.4  | 0.3  | 0.5  | 0.4  | 0.4  |
| Etohi1   | 11.0 | 11.2 | 13.9 | 13.1 | 12.9 | 13.2 | 10.9 | 13.8 | 11.9 | 12.8 | 15.9 | 14.6 |
| Ets1     | 22.1 | 22.7 | 18.6 | 25.8 | 26.3 | 21.5 | 28.8 | 19.1 | 23.4 | 16.3 | 19.8 | 18.4 |
| Ets2     | 4.4  | 2.8  | 3.6  | 10.3 | 20.7 | 3.5  | 6.0  | 3.7  | 4.0  | 5.1  | 3.9  | 4.0  |
| Etv1     | 1.0  | 1.3  | 1.3  | 2.3  | 1.1  | 1.5  | 1.2  | 1.2  | 1.1  | 0.9  | 0.9  | 1.1  |
| Etv3     | 3.8  | 4.2  | 3.6  | 5.2  | 5.7  | 3.9  | 4.3  | 3.9  | 3.8  | 4.0  | 4.4  | 4.0  |
| Etv4     | 0.9  | 0.8  | 0.6  | 0.9  | 1.2  | 1.3  | 0.8  | 0.5  | 0.5  | 2.8  | 0.9  | 0.8  |
| Etv5     | 6.3  | 5.7  | 5.1  | 6.3  | 7.6  | 7.0  | 6.9  | 3.6  | 4.2  | 9.1  | 6.6  | 4.7  |
| Etv6     | 4.9  | 6.7  | 7.2  | 6.0  | 6.7  | 4.8  | 8.9  | 7.9  | 8.7  | 5.7  | 7.5  | 6.6  |
| EU599041 | 0.0  | 0.0  | 0.1  | 0.0  | 0.0  | 0.0  | 0.0  | 0.1  | 0.1  | 0.0  | 0.0  | 0.1  |
| Eva1a    | 0.1  | 0.1  | 0.0  | 0.0  | 0.0  | 0.0  | 0.0  | 0.1  | 0.1  | 0.0  | 0.0  | 0.0  |
| Eva1b    | 18.5 | 20.0 | 16.4 | 16.5 | 16.4 | 17.4 | 20.2 | 23.3 | 25.5 | 25.0 | 18.8 | 18.2 |
| Eva1c    | 1.9  | 1.3  | 2.4  | 0.5  | 1.1  | 0.9  | 1.3  | 1.5  | 1.1  | 1.9  | 1.7  | 1.6  |
| Evc      | 10.2 | 10.0 | 12.4 | 8.8  | 8.4  | 10.1 | 10.8 | 10.7 | 9.1  | 8.9  | 8.6  | 9.7  |
| Evc2     | 11.7 | 13.5 | 13.4 | 12.4 | 9.6  | 13.6 | 13.1 | 12.4 | 12.1 | 11.3 | 11.9 | 11.6 |
| Evi2a    | 2.6  | 1.3  | 1.2  | 11.2 | 11.9 | 3.3  | 2.8  | 0.8  | 1.1  | 1.9  | 1.5  | 1.6  |
| Evi2b    | 0.3  | 0.1  | 0.1  | 2.4  | 3.2  | 0.1  | 0.7  | 0.1  | 0.1  | 0.4  | 0.2  | 0.2  |
| Evi5     | 13.4 | 12.9 | 12.2 | 14.3 | 12.1 | 13.9 | 13.0 | 11.8 | 11.9 | 12.6 | 14.2 | 14.1 |
| Evi5l    | 6.1  | 7.6  | 6.8  | 7.1  | 4.7  | 6.1  | 6.9  | 5.4  | 5.8  | 5.7  | 4.8  | 5.7  |
| Evl      | 3.3  | 2.5  | 2.5  | 7.9  | 9.2  | 3.8  | 4.9  | 3.0  | 3.4  | 3.7  | 4.2  | 3.2  |
| Evpl     | 0.1  | 0.2  | 0.1  | 0.1  | 0.1  | 0.3  | 0.1  | 0.1  | 0.0  | 0.3  | 0.2  | 0.1  |
| Ewsr1    | 43.6 | 44.3 | 45.0 | 58.9 | 44.3 | 45.5 | 53.0 | 48.7 | 44.5 | 44.4 | 48.6 | 48.3 |
| Exd1     | 1.1  | 1.2  | 1.0  | 0.9  | 0.7  | 1.0  | 1.1  | 0.6  | 1.0  | 0.7  | 1.1  | 0.7  |
| Exd2     | 4.2  | 4.1  | 3.4  | 4.8  | 3.5  | 5.4  | 4.4  | 3.7  | 4.1  | 3.5  | 4.3  | 3.6  |
| Exo1     | 0.4  | 0.9  | 1.4  | 0.2  | 1.0  | 0.1  | 1.1  | 0.9  | 0.8  | 0.5  | 0.9  | 0.6  |
| Exo5     | 5.9  | 5.6  | 6.0  | 7.7  | 6.2  | 7.6  | 5.6  | 5.7  | 6.7  | 5.7  | 5.6  | 7.6  |
| Exoc1    | 11.6 | 12.4 | 10.3 | 11.6 | 11.2 | 12.7 | 10.9 | 10.6 | 11.8 | 10.2 | 11.3 | 10.6 |
| Exoc2    | 20.6 | 19.9 | 16.6 | 19.1 | 19.5 | 20.6 | 17.4 | 14.3 | 16.8 | 18.3 | 17.7 | 17.3 |
| Exoc3    | 20.1 | 17.1 | 15.4 | 21.1 | 15.7 | 17.3 | 16.0 | 13.3 | 14.4 | 16.4 | 17.9 | 16.4 |
| Exoc3l   | 0.6  | 0.6  | 0.4  | 0.6  | 0.3  | 0.6  | 0.5  | 0.7  | 0.4  | 0.3  | 0.3  | 0.5  |
| Exoc3l4  | 2.1  | 3.2  | 3.8  | 1.9  | 2.7  | 2.7  | 2.2  | 1.7  | 1.6  | 1.9  | 1.5  | 1.8  |
| Exoc4    | 73.2 | 70.9 | 70.9 | 59.9 | 64.6 | 65.7 | 62.6 | 64.7 | 60.6 | 75.1 | 75.6 | 76.0 |
| Exoc5    | 20.9 | 22.7 | 21.0 | 23.9 | 23.0 | 22.7 | 22.9 | 19.3 | 23.7 | 24.5 | 27.2 | 27.6 |
| Exoc6    | 3.3  | 1.5  | 1.2  | 3.7  | 2.5  | 2.8  | 1.1  | 1.5  | 1.1  | 2.9  | 1.8  | 2.0  |
| Exoc6b   | 13.1 | 13.0 | 11.3 | 14.0 | 12.6 | 12.8 | 13.0 | 10.8 | 10.8 | 12.6 | 13.4 | 12.7 |
| Exoc7    | 19.7 | 19.2 | 16.8 | 19.1 | 16.6 | 20.4 | 15.9 | 15.2 | 14.5 | 15.9 | 16.1 | 15.7 |
| Exoc8    | 6.3  | 6.4  | 6.3  | 7.2  | 6.6  | 7.0  | 7.1  | 6.3  | 7.1  | 7.0  | 6.2  | 6.9  |
| Exog     | 1.6  | 1.7  | 1.9  | 1.6  | 1.6  | 1.9  | 1.4  | 1.4  | 1.4  | 1.6  | 1.5  | 1.5  |
| Exosc1   | 8.7  | 10.2 | 9.1  | 11.1 | 8.8  | 10.7 | 9.7  | 10.3 | 8.6  | 7.9  | 11.2 | 9.2  |
| Exosc10  | 14.9 | 13.5 | 14.6 | 16.3 | 13.6 | 14.4 | 15.8 | 14.7 | 13.3 | 13.9 | 14.9 | 14.5 |
| Exosc2   | 7.0  | 6.5  | 6.2  | 7.8  | 6.2  | 6.0  | 8.7  | 5.6  | 5.7  | 7.1  | 6.4  | 6.4  |
| Exosc3   | 11.8 | 9.3  | 11.9 | 11.3 | 11.1 | 11.5 | 11.3 | 11.5 | 9.2  | 12.4 | 12.8 | 12.8 |
| Exosc4   | 8.8  | 7.9  | 6.3  | 7.5  | 7.2  | 7.8  | 6.6  | 7.1  | 6.9  | 8.9  | 7.5  | 5.4  |
| Exosc5   | 9.0  | 7.8  | 6.0  | 9.2  | 7.9  | 10.4 | 6.6  | 7.6  | 7.3  | 8.9  | 7.0  | 6.0  |
| Exosc6   | 4.9  | 5.9  | 4.6  | 4.6  | 6.2  | 4.5  | 8.4  | 6.0  | 5.8  | 7.4  | 7.5  | 6.6  |
| Exosc7   | 10.1 | 11.2 | 10.2 | 10.1 | 8.3  | 9.9  | 8.4  | 9.1  | 8.4  | 9.9  | 9.2  | 7.6  |
| Exosc8   | 8.1  | 11.2 | 10.7 | 8.7  | 9.1  | 8.4  | 9.5  | 10.1 | 10.6 | 8.3  | 10.1 | 7.7  |
| Exosc9   | 30.3 | 26.5 | 22.2 | 29.3 | 20.7 | 26.0 | 22.6 | 20.5 | 21.4 | 21.5 | 25.1 | 25.3 |
| Exph5    | 0.0  | 0.0  | 0.0  | 0.0  | 0.0  | 0.0  | 0.0  | 0.0  | 0.0  | 0.0  | 0.0  | 0.0  |
| Ext1     | 70.0 | 60.7 | 57.0 | 75.7 | 79.3 | 65.9 | 84.6 | 66.5 | 80.8 | 72.1 | 74.5 | 83.1 |
| Ext2     | 37.5 | 34.4 | 30.7 | 35.0 | 30.9 | 37.9 | 33.6 | 31.8 | 31.7 | 29.8 | 28.7 | 28.0 |
| Extl1    | 0.8  | 0.4  | 0.1  | 0.9  | 0.2  | 1.1  | 0.3  | 0.3  | 0.2  | 0.3  | 0.4  | 0.2  |
| Extl2    | 11.2 | 11.2 | 11.5 | 13.3 | 9.6  | 13.5 | 11.2 | 11.0 | 9.4  | 12.1 | 11.8 | 12.2 |
| Extl3    | 15.9 | 18.1 | 18.4 | 16.8 | 24.9 | 14.6 | 22.7 | 15.6 | 19.5 | 19.7 | 15.5 | 18.3 |
| Eya1     | 0.1  | 0.2  | 0.1  | 0.3  | 0.1  | 0.1  | 0.1  | 0.1  | 0.1  | 0.0  | 0.1  | 0.0  |
| Eya2     | 1.4  | 3.2  | 3.9  | 1.1  | 2.0  | 1.4  | 1.7  | 2.2  | 1.5  | 1.7  | 2.0  | 1.9  |

Online Table 1

|               |      |       |       |       |       |       |       |       |       |       |       |       |
|---------------|------|-------|-------|-------|-------|-------|-------|-------|-------|-------|-------|-------|
| Eya3          | 6.2  | 7.3   | 7.7   | 7.6   | 8.2   | 6.9   | 7.4   | 8.3   | 7.0   | 6.2   | 7.1   | 6.3   |
| Eya4          | 7.0  | 7.1   | 7.7   | 7.0   | 6.1   | 10.6  | 9.5   | 9.6   | 9.5   | 6.6   | 11.8  | 10.1  |
| Ezh1          | 10.2 | 12.9  | 10.4  | 10.0  | 8.9   | 12.0  | 7.8   | 9.8   | 9.0   | 8.3   | 8.6   | 9.6   |
| Ezh2          | 1.9  | 2.5   | 3.7   | 1.4   | 3.6   | 1.5   | 3.4   | 3.6   | 3.1   | 3.0   | 3.1   | 3.4   |
| Ezr           | 66.7 | 26.5  | 17.2  | 36.3  | 21.4  | 20.3  | 13.3  | 13.6  | 13.3  | 152.1 | 81.1  | 49.7  |
| F11r          | 2.7  | 0.6   | 0.8   | 1.0   | 1.4   | 0.7   | 0.8   | 1.2   | 1.3   | 10.0  | 5.2   | 3.1   |
| F13a1         | 0.2  | 0.0   | 0.0   | 0.3   | 0.1   | 0.1   | 0.0   | 0.0   | 0.0   | 0.0   | 0.0   | 0.0   |
| F2r           | 98.0 | 101.2 | 103.9 | 124.2 | 94.5  | 116.5 | 125.4 | 105.2 | 119.6 | 128.9 | 113.6 | 126.1 |
| F2r11         | 0.4  | 0.3   | 0.4   | 0.1   | 0.3   | 0.1   | 0.3   | 0.4   | 0.3   | 0.1   | 0.3   | 0.1   |
| F2r12         | 0.1  | 0.0   | 0.0   | 0.1   | 0.1   | 0.0   | 0.0   | 0.0   | 0.0   | 0.0   | 0.1   | 0.0   |
| F2r13         | 0.2  | 0.2   | 0.2   | 0.0   | 0.2   | 0.0   | 0.2   | 0.2   | 0.2   | 0.2   | 0.1   | 0.1   |
| F3            | 95.1 | 145.3 | 159.1 | 96.4  | 112.2 | 80.4  | 86.5  | 75.9  | 70.3  | 113.9 | 132.3 | 90.4  |
| F420014N23Rik | 0.5  | 0.6   | 0.5   | 0.7   | 0.4   | 0.4   | 0.6   | 0.6   | 0.4   | 0.4   | 0.4   | 0.5   |
| F5            | 0.1  | 0.1   | 0.1   | 0.0   | 0.0   | 0.0   | 0.0   | 0.0   | 0.0   | 0.0   | 0.0   | 0.0   |
| F630028O10Rik | 0.2  | 0.0   | 0.0   | 2.0   | 2.4   | 0.0   | 0.2   | 0.0   | 0.0   | 0.1   | 0.1   | 0.1   |
| F630042J09Rik | 0.0  | 0.0   | 0.0   | 0.0   | 0.0   | 0.0   | 0.0   | 0.0   | 0.0   | 0.0   | 0.0   | 0.0   |
| F630111L10Rik | 0.0  | 0.0   | 0.0   | 0.0   | 0.0   | 0.0   | 0.0   | 0.0   | 0.0   | 0.0   | 0.0   | 0.0   |
| F630206G17Rik | 0.0  | 0.0   | 0.0   | 0.0   | 0.0   | 0.0   | 0.0   | 0.0   | 0.0   | 0.0   | 0.1   | 0.0   |
| F730035M05Rik | 0.1  | 0.0   | 0.0   | 0.1   | 0.1   | 0.0   | 0.1   | 0.0   | 0.0   | 0.0   | 0.0   | 0.0   |
| F730043M19Rik | 4.2  | 6.7   | 5.8   | 6.9   | 7.1   | 8.8   | 10.0  | 5.0   | 5.5   | 4.3   | 5.7   | 5.6   |
| F8            | 1.0  | 1.1   | 1.0   | 0.7   | 0.7   | 0.8   | 0.9   | 1.1   | 0.7   | 1.0   | 1.2   | 1.0   |
| F830016B08Rik | 0.6  | 0.3   | 1.0   | 1.1   | 0.8   | 0.4   | 0.3   | 0.2   | 0.2   | 0.2   | 0.3   | 0.9   |
| F8a           | 1.9  | 1.8   | 1.5   | 1.9   | 1.4   | 1.5   | 1.5   | 1.8   | 1.7   | 1.8   | 1.8   | 1.5   |
| F9            | 0.0  | 0.0   | 0.0   | 0.0   | 0.2   | 0.0   | 0.0   | 0.0   | 0.0   | 0.0   | 0.0   | 0.0   |
| F930015N05Rik | 0.0  | 0.0   | 0.0   | 0.0   | 0.1   | 0.1   | 0.1   | 0.0   | 0.0   | 0.0   | 0.0   | 0.0   |
| Faah          | 0.3  | 0.4   | 0.2   | 0.4   | 0.3   | 0.7   | 0.2   | 0.3   | 0.3   | 0.2   | 0.4   | 0.2   |
| Fabp3         | 8.1  | 3.4   | 2.0   | 5.1   | 2.2   | 4.8   | 2.7   | 3.4   | 1.4   | 6.7   | 5.3   | 7.2   |
| Fabp4         | 6.6  | 2.4   | 2.8   | 8.2   | 2.4   | 2.0   | 3.2   | 5.3   | 6.3   | 4.4   | 2.0   | 3.6   |
| Fabp5         | 96.4 | 139.3 | 125.2 | 65.1  | 72.4  | 51.0  | 134.6 | 160.7 | 227.7 | 72.4  | 160.7 | 105.2 |
| Fabp7         | 0.5  | 0.3   | 0.4   | 0.5   | 0.3   | 0.4   | 0.1   | 0.3   | 0.2   | 0.2   | 0.2   | 0.4   |
| Fadd          | 2.4  | 2.2   | 2.0   | 2.9   | 2.3   | 2.0   | 2.4   | 2.7   | 2.5   | 2.4   | 2.4   | 2.3   |
| Fads1         | 44.9 | 52.5  | 45.8  | 39.4  | 38.4  | 46.7  | 56.8  | 61.9  | 63.9  | 28.9  | 56.5  | 36.4  |
| Fads2         | 63.7 | 86.7  | 81.5  | 46.5  | 66.9  | 54.0  | 105.0 | 97.5  | 91.2  | 54.1  | 94.8  | 56.8  |
| Fads3         | 59.0 | 63.7  | 47.4  | 64.3  | 56.9  | 56.1  | 79.8  | 73.7  | 85.0  | 44.6  | 64.0  | 54.5  |
| Fads6         | 11.6 | 14.9  | 14.1  | 8.0   | 9.1   | 6.6   | 6.4   | 14.5  | 12.0  | 7.5   | 7.1   | 13.4  |
| Faf1          | 19.2 | 18.6  | 15.5  | 15.4  | 15.1  | 16.7  | 16.6  | 16.0  | 17.7  | 16.9  | 19.4  | 16.4  |
| Faf2          | 22.1 | 21.4  | 22.3  | 26.3  | 21.5  | 22.6  | 25.2  | 21.8  | 21.4  | 20.8  | 22.7  | 23.2  |
| Fah           | 27.6 | 27.6  | 29.4  | 22.0  | 19.8  | 23.3  | 22.3  | 20.9  | 18.0  | 26.7  | 25.4  | 23.8  |
| Fahd1         | 3.6  | 3.4   | 3.6   | 3.5   | 3.3   | 4.8   | 2.7   | 3.6   | 3.5   | 3.1   | 3.7   | 2.5   |
| Fahd2a        | 3.2  | 3.8   | 3.1   | 2.7   | 1.9   | 5.4   | 2.1   | 2.3   | 1.9   | 2.3   | 2.0   | 2.9   |
| Faim          | 22.2 | 20.8  | 26.5  | 29.3  | 18.7  | 24.3  | 26.0  | 23.3  | 19.1  | 20.4  | 23.6  | 27.0  |
| Faim2         | 0.0  | 0.1   | 0.1   | 0.0   | 0.0   | 0.0   | 0.0   | 0.1   | 0.0   | 0.0   | 0.0   | 0.1   |
| Fam101a       | 0.1  | 0.3   | 0.2   | 0.2   | 0.1   | 0.2   | 0.3   | 0.3   | 0.2   | 0.1   | 0.0   | 0.2   |
| Fam101b       | 20.9 | 21.9  | 26.6  | 20.4  | 28.8  | 24.5  | 42.2  | 45.0  | 44.1  | 31.4  | 42.5  | 47.1  |
| Fam102a       | 1.5  | 1.4   | 1.9   | 1.9   | 1.7   | 1.7   | 1.1   | 1.9   | 1.1   | 1.9   | 1.1   | 1.5   |
| Fam102b       | 12.7 | 14.7  | 15.0  | 11.6  | 15.8  | 10.5  | 16.3  | 15.1  | 15.8  | 12.3  | 13.6  | 12.9  |
| Fam103a1      | 25.2 | 22.8  | 28.3  | 29.9  | 22.2  | 28.5  | 24.4  | 25.1  | 20.5  | 23.7  | 31.9  | 32.3  |
| Fam104a       | 10.8 | 11.5  | 11.4  | 14.7  | 12.5  | 12.9  | 14.3  | 12.7  | 12.4  | 12.3  | 13.1  | 12.6  |
| Fam105a       | 0.6  | 0.2   | 0.2   | 3.4   | 6.0   | 0.2   | 0.7   | 0.1   | 0.2   | 0.5   | 0.3   | 0.6   |
| Fam105b       | 13.8 | 11.3  | 11.4  | 16.6  | 19.2  | 10.9  | 13.6  | 12.8  | 11.5  | 12.7  | 14.2  | 14.8  |
| Fam107a       | 0.0  | 0.0   | 0.0   | 0.1   | 0.0   | 0.0   | 0.0   | 0.0   | 0.0   | 0.0   | 0.0   | 0.0   |
| Fam107b       | 24.3 | 15.2  | 10.8  | 19.8  | 16.1  | 15.9  | 14.8  | 6.9   | 10.2  | 15.2  | 15.5  | 15.4  |
| Fam108a       | 31.5 | 25.7  | 22.2  | 25.3  | 27.5  | 28.8  | 27.1  | 28.2  | 28.1  | 33.0  | 26.1  | 21.9  |
| Fam108b       | 6.3  | 6.5   | 6.3   | 5.3   | 5.0   | 4.6   | 5.0   | 6.1   | 7.3   | 6.1   | 7.2   | 6.8   |
| Fam108c       | 19.7 | 20.1  | 18.7  | 11.8  | 12.7  | 11.3  | 13.0  | 16.8  | 17.2  | 14.2  | 16.4  | 17.1  |
| Fam109a       | 3.1  | 3.4   | 2.7   | 2.6   | 2.7   | 2.7   | 3.0   | 3.1   | 3.4   | 3.1   | 2.6   | 2.4   |
| Fam109b       | 0.5  | 0.5   | 0.6   | 0.5   | 0.3   | 0.5   | 0.7   | 0.7   | 0.6   | 0.8   | 0.3   | 0.6   |

Online Table 1

|           |       |       |       |       |       |       |       |       |       |       |       |       |
|-----------|-------|-------|-------|-------|-------|-------|-------|-------|-------|-------|-------|-------|
| Fam110a   | 2.6   | 2.8   | 2.7   | 2.3   | 3.0   | 2.6   | 2.3   | 1.4   | 2.2   | 3.8   | 2.5   | 2.2   |
| Fam110b   | 2.7   | 2.9   | 2.4   | 2.8   | 2.3   | 2.9   | 2.3   | 3.1   | 2.5   | 2.6   | 2.6   | 2.0   |
| Fam110c   | 4.2   | 1.5   | 0.7   | 1.2   | 0.5   | 1.0   | 0.6   | 0.8   | 1.7   | 18.8  | 7.7   | 5.3   |
| Fam111a   | 7.9   | 11.4  | 15.2  | 8.2   | 20.7  | 4.3   | 16.6  | 10.9  | 12.0  | 10.2  | 14.6  | 9.5   |
| Fam114a1  | 104.3 | 99.5  | 104.0 | 117.8 | 82.7  | 111.6 | 113.5 | 106.6 | 97.1  | 92.6  | 122.3 | 121.1 |
| Fam114a2  | 27.5  | 29.0  | 30.9  | 29.8  | 24.8  | 28.7  | 26.4  | 28.0  | 26.1  | 27.6  | 30.2  | 29.8  |
| Fam115a   | 25.9  | 26.5  | 22.4  | 20.3  | 20.4  | 22.0  | 23.0  | 19.6  | 24.3  | 23.2  | 22.6  | 21.8  |
| Fam115c   | 5.5   | 5.8   | 7.0   | 4.8   | 6.2   | 5.3   | 5.5   | 6.2   | 5.4   | 6.9   | 8.1   | 5.2   |
| Fam115e   | 0.0   | 0.0   | 0.0   | 0.0   | 0.0   | 0.0   | 0.0   | 0.0   | 0.0   | 0.0   | 0.0   | 0.0   |
| Fam117a   | 3.1   | 4.0   | 3.4   | 2.1   | 2.6   | 3.1   | 2.5   | 2.8   | 3.3   | 3.3   | 2.8   | 2.9   |
| Fam117b   | 4.2   | 4.7   | 4.3   | 3.6   | 3.9   | 4.7   | 3.8   | 4.2   | 4.0   | 4.3   | 5.2   | 4.5   |
| Fam118a   | 8.1   | 7.7   | 5.9   | 6.6   | 8.1   | 6.7   | 6.7   | 5.0   | 5.7   | 7.1   | 6.3   | 6.6   |
| Fam118b   | 13.5  | 10.4  | 9.7   | 10.3  | 10.2  | 10.0  | 8.7   | 9.7   | 9.1   | 12.7  | 11.8  | 10.5  |
| Fam120a   | 63.2  | 68.7  | 64.0  | 66.2  | 68.0  | 67.3  | 70.5  | 61.5  | 64.4  | 61.1  | 71.5  | 60.7  |
| Fam120aos | 1.9   | 1.4   | 2.0   | 1.6   | 2.0   | 1.9   | 1.3   | 1.6   | 1.7   | 1.9   | 2.8   | 2.3   |
| Fam120b   | 12.7  | 11.5  | 11.8  | 11.8  | 11.4  | 13.8  | 11.3  | 9.9   | 10.1  | 12.5  | 13.0  | 12.7  |
| Fam120c   | 3.5   | 3.5   | 3.4   | 3.4   | 3.0   | 3.4   | 3.0   | 3.4   | 2.4   | 3.3   | 3.3   | 3.0   |
| Fam122a   | 3.8   | 3.6   | 3.9   | 3.9   | 3.4   | 3.1   | 3.8   | 4.2   | 3.8   | 3.8   | 4.2   | 3.5   |
| Fam122b   | 0.5   | 0.6   | 0.9   | 0.8   | 0.7   | 1.0   | 0.7   | 0.5   | 0.5   | 0.4   | 0.4   | 0.5   |
| Fam124a   | 8.0   | 7.0   | 4.8   | 10.2  | 5.0   | 8.5   | 4.8   | 3.3   | 2.8   | 2.1   | 2.9   | 3.1   |
| Fam126a   | 4.7   | 6.3   | 5.7   | 5.3   | 6.1   | 4.2   | 5.4   | 5.3   | 5.9   | 5.8   | 6.5   | 5.3   |
| Fam126b   | 1.5   | 2.0   | 1.6   | 1.7   | 1.5   | 1.9   | 1.3   | 1.2   | 1.5   | 1.9   | 1.9   | 1.7   |
| Fam129a   | 44.7  | 34.9  | 41.8  | 55.5  | 39.4  | 51.4  | 35.8  | 43.7  | 34.4  | 24.6  | 37.2  | 32.9  |
| Fam129b   | 252.4 | 223.5 | 158.2 | 303.9 | 226.1 | 302.2 | 237.1 | 153.3 | 179.8 | 192.1 | 202.5 | 182.5 |
| Fam129c   | 0.8   | 0.5   | 0.4   | 0.6   | 0.4   | 0.6   | 0.4   | 0.4   | 0.5   | 0.5   | 0.6   | 0.6   |
| Fam131a   | 2.9   | 3.7   | 3.0   | 3.1   | 1.9   | 4.9   | 2.6   | 2.2   | 3.0   | 3.8   | 3.2   | 3.1   |
| Fam131b   | 0.5   | 0.8   | 1.0   | 0.2   | 0.7   | 1.0   | 1.7   | 2.5   | 1.9   | 1.4   | 2.1   | 1.1   |
| Fam131c   | 0.1   | 0.2   | 0.1   | 0.2   | 0.1   | 0.3   | 0.2   | 0.1   | 0.0   | 0.1   | 0.2   | 0.0   |
| Fam132a   | 7.4   | 9.6   | 9.1   | 4.4   | 7.6   | 8.8   | 4.5   | 8.0   | 8.5   | 10.0  | 5.6   | 7.7   |
| Fam132b   | 1.1   | 2.0   | 1.2   | 0.4   | 1.5   | 0.7   | 1.9   | 0.7   | 1.9   | 0.7   | 1.2   | 1.3   |
| Fam133b   | 5.7   | 5.5   | 6.9   | 6.7   | 6.4   | 5.8   | 6.9   | 6.7   | 5.6   | 6.6   | 7.4   | 7.6   |
| Fam134a   | 11.4  | 12.1  | 12.2  | 14.4  | 12.5  | 15.2  | 13.3  | 12.8  | 13.5  | 13.4  | 10.8  | 11.8  |
| Fam134b   | 2.5   | 1.1   | 0.9   | 5.1   | 5.9   | 2.6   | 1.2   | 0.5   | 0.5   | 1.9   | 1.6   | 1.4   |
| Fam134c   | 12.2  | 14.1  | 14.5  | 12.3  | 14.5  | 12.0  | 13.8  | 15.6  | 15.7  | 14.8  | 13.6  | 13.2  |
| Fam135a   | 4.2   | 4.8   | 4.1   | 4.4   | 3.6   | 4.1   | 3.5   | 3.4   | 3.7   | 3.6   | 4.4   | 4.3   |
| Fam136a   | 16.5  | 14.7  | 13.0  | 14.7  | 13.2  | 16.1  | 11.2  | 12.5  | 13.5  | 14.2  | 14.7  | 13.0  |
| Fam13a    | 0.3   | 0.4   | 0.4   | 0.8   | 0.4   | 0.4   | 0.1   | 0.1   | 0.1   | 0.1   | 0.0   | 0.0   |
| Fam13b    | 31.0  | 25.4  | 19.5  | 34.3  | 27.3  | 27.6  | 27.8  | 18.8  | 26.0  | 29.0  | 32.9  | 31.3  |
| Fam13c    | 3.7   | 9.1   | 15.8  | 2.9   | 5.6   | 4.1   | 7.4   | 16.6  | 11.4  | 5.3   | 7.4   | 8.8   |
| Fam149a   | 11.0  | 10.5  | 10.7  | 12.4  | 8.6   | 12.8  | 9.7   | 9.4   | 8.4   | 8.0   | 10.1  | 9.6   |
| Fam149b   | 15.4  | 13.5  | 13.7  | 16.9  | 12.7  | 17.8  | 13.8  | 13.7  | 11.1  | 12.6  | 16.2  | 14.6  |
| Fam150a   | 0.0   | 0.1   | 0.0   | 0.1   | 0.1   | 0.0   | 0.0   | 0.0   | 0.0   | 0.1   | 0.3   | 0.0   |
| Fam151b   | 2.8   | 2.0   | 1.8   | 2.8   | 2.1   | 2.4   | 2.1   | 2.5   | 1.8   | 2.0   | 1.4   | 2.1   |
| Fam154b   | 0.2   | 0.2   | 0.2   | 0.1   | 0.1   | 0.2   | 0.0   | 0.1   | 0.1   | 0.1   | 0.2   | 0.2   |
| Fam155a   | 0.0   | 0.0   | 0.0   | 0.0   | 0.0   | 0.0   | 0.0   | 0.0   | 0.0   | 0.0   | 0.0   | 0.0   |
| Fam159b   | 0.1   | 0.1   | 0.1   | 0.2   | 0.1   | 0.1   | 0.0   | 0.0   | 0.0   | 0.0   | 0.0   | 0.0   |
| Fam160a1  | 6.1   | 5.8   | 5.6   | 5.6   | 5.5   | 5.9   | 6.5   | 4.7   | 4.8   | 5.2   | 6.1   | 5.6   |
| Fam160a2  | 1.2   | 1.5   | 1.3   | 1.1   | 1.2   | 1.2   | 1.3   | 1.1   | 1.4   | 1.5   | 1.2   | 1.2   |
| Fam160b1  | 7.4   | 7.7   | 7.1   | 6.1   | 7.0   | 7.3   | 7.2   | 7.1   | 7.5   | 8.1   | 8.3   | 7.7   |
| Fam160b2  | 1.8   | 1.8   | 2.1   | 1.7   | 2.1   | 2.2   | 2.2   | 2.4   | 1.8   | 1.9   | 2.0   | 1.8   |
| Fam161a   | 1.2   | 1.5   | 2.1   | 1.8   | 1.4   | 1.7   | 1.3   | 1.7   | 1.7   | 1.1   | 1.6   | 2.2   |
| Fam161b   | 0.8   | 0.8   | 0.8   | 0.9   | 0.5   | 1.0   | 0.5   | 0.4   | 0.6   | 0.6   | 0.4   | 0.6   |
| Fam162a   | 77.9  | 67.7  | 63.4  | 64.4  | 64.1  | 73.1  | 62.0  | 52.5  | 58.9  | 80.9  | 72.5  | 84.4  |
| Fam163a   | 0.0   | 0.0   | 0.0   | 0.0   | 0.0   | 0.0   | 0.0   | 0.0   | 0.0   | 0.0   | 0.0   | 0.0   |
| Fam163b   | 0.0   | 0.1   | 0.1   | 0.0   | 0.0   | 0.1   | 0.0   | 0.1   | 0.0   | 0.0   | 0.0   | 0.0   |
| Fam166a   | 0.2   | 0.0   | 0.1   | 0.0   | 0.2   | 0.0   | 0.0   | 0.0   | 0.3   | 0.1   | 0.1   | 0.2   |
| Fam166b   | 0.2   | 0.2   | 0.4   | 0.1   | 0.1   | 0.2   | 0.0   | 0.1   | 0.2   | 0.2   | 0.2   | 0.1   |

Online Table 1

|          |      |      |      |      |      |       |       |      |      |      |      |      |
|----------|------|------|------|------|------|-------|-------|------|------|------|------|------|
| Fam167a  | 0.1  | 0.0  | 0.0  | 0.0  | 0.0  | 0.0   | 0.0   | 0.0  | 0.0  | 0.0  | 0.1  | 0.0  |
| Fam167b  | 0.2  | 0.1  | 0.4  | 0.1  | 0.0  | 0.0   | 0.2   | 0.1  | 0.3  | 0.0  | 0.1  | 0.2  |
| Fam168a  | 4.5  | 5.8  | 6.5  | 4.3  | 5.4  | 4.3   | 5.4   | 6.1  | 5.5  | 5.7  | 5.2  | 5.7  |
| Fam168b  | 24.7 | 25.6 | 22.0 | 24.8 | 26.0 | 22.3  | 24.6  | 20.2 | 24.7 | 23.6 | 22.0 | 23.2 |
| Fam169a  | 0.1  | 0.0  | 0.1  | 0.2  | 0.1  | 0.1   | 0.1   | 0.1  | 0.1  | 0.1  | 0.1  | 0.2  |
| Fam169b  | 1.6  | 2.2  | 1.2  | 1.9  | 1.4  | 1.6   | 1.5   | 2.0  | 1.3  | 0.9  | 1.2  | 0.6  |
| Fam171a1 | 12.8 | 15.4 | 14.9 | 12.4 | 13.3 | 15.1  | 17.0  | 13.1 | 13.6 | 12.6 | 13.8 | 14.0 |
| Fam171a2 | 3.2  | 3.3  | 3.0  | 2.6  | 2.0  | 3.3   | 2.3   | 3.7  | 3.9  | 3.3  | 3.2  | 2.9  |
| Fam171b  | 2.0  | 2.1  | 2.2  | 2.0  | 1.7  | 3.1   | 1.8   | 2.9  | 1.8  | 1.6  | 2.4  | 2.3  |
| Fam172a  | 5.9  | 7.0  | 6.9  | 6.0  | 6.0  | 5.8   | 6.3   | 6.4  | 7.3  | 6.4  | 6.9  | 6.9  |
| Fam173a  | 25.1 | 24.5 | 20.0 | 19.2 | 19.8 | 25.0  | 17.2  | 19.5 | 24.3 | 25.7 | 18.0 | 18.3 |
| Fam173b  | 9.1  | 8.3  | 7.1  | 9.5  | 8.0  | 9.1   | 9.4   | 6.9  | 8.1  | 8.0  | 9.0  | 8.3  |
| Fam174a  | 11.3 | 10.9 | 10.2 | 12.5 | 10.1 | 13.5  | 10.9  | 9.6  | 11.1 | 12.3 | 10.9 | 12.6 |
| Fam174b  | 5.7  | 3.3  | 1.6  | 8.7  | 2.1  | 5.8   | 3.3   | 1.6  | 1.4  | 2.2  | 2.7  | 1.5  |
| Fam175a  | 2.5  | 2.5  | 3.1  | 2.4  | 2.7  | 3.2   | 3.0   | 2.9  | 3.1  | 2.3  | 3.6  | 2.7  |
| Fam175b  | 16.1 | 18.1 | 18.8 | 16.4 | 17.2 | 14.7  | 17.1  | 17.8 | 18.9 | 17.0 | 18.2 | 20.8 |
| Fam177a  | 25.9 | 20.9 | 23.6 | 30.6 | 24.4 | 24.4  | 29.4  | 21.4 | 25.9 | 20.9 | 28.5 | 30.8 |
| Fam178a  | 13.9 | 19.0 | 18.0 | 13.8 | 13.8 | 13.3  | 13.4  | 10.6 | 12.6 | 13.1 | 13.2 | 15.7 |
| Fam178b  | 0.6  | 0.9  | 1.5  | 0.3  | 0.6  | 0.9   | 0.5   | 0.9  | 0.7  | 1.0  | 0.5  | 0.7  |
| Fam179a  | 0.0  | 0.0  | 0.0  | 0.2  | 0.0  | 0.0   | 0.0   | 0.0  | 0.0  | 0.0  | 0.0  | 0.0  |
| Fam179b  | 6.9  | 6.9  | 7.0  | 6.3  | 6.1  | 7.4   | 5.4   | 6.2  | 6.4  | 6.7  | 7.1  | 6.6  |
| Fam180a  | 2.7  | 1.8  | 1.0  | 0.4  | 0.5  | 0.6   | 1.3   | 2.4  | 1.5  | 8.1  | 2.7  | 3.2  |
| Fam184a  | 0.4  | 0.2  | 0.3  | 0.2  | 0.2  | 0.3   | 0.1   | 0.2  | 0.1  | 2.0  | 1.2  | 0.5  |
| Fam184b  | 0.0  | 0.0  | 0.0  | 0.0  | 0.0  | 0.0   | 0.0   | 0.0  | 0.0  | 0.0  | 0.1  | 0.0  |
| Fam185a  | 1.3  | 1.4  | 1.4  | 1.3  | 1.2  | 1.9   | 1.2   | 1.1  | 1.4  | 1.7  | 1.5  | 1.3  |
| Fam186b  | 0.1  | 0.1  | 0.3  | 0.1  | 0.1  | 0.2   | 0.1   | 0.0  | 0.1  | 0.1  | 0.2  | 0.0  |
| Fam188a  | 15.9 | 14.1 | 12.4 | 15.9 | 14.6 | 13.1  | 13.0  | 10.9 | 13.5 | 15.3 | 15.5 | 14.6 |
| Fam188b  | 1.9  | 2.0  | 1.7  | 1.6  | 1.6  | 1.9   | 1.4   | 1.7  | 1.5  | 1.9  | 1.7  | 1.8  |
| Fam189a2 | 0.5  | 0.4  | 0.4  | 0.5  | 0.3  | 0.6   | 0.6   | 0.3  | 0.9  | 0.6  | 0.7  | 0.7  |
| Fam189b  | 2.3  | 3.0  | 2.7  | 2.3  | 3.0  | 3.1   | 3.8   | 2.7  | 3.2  | 2.4  | 2.8  | 1.7  |
| Fam192a  | 20.9 | 19.1 | 19.0 | 27.5 | 18.7 | 21.6  | 19.3  | 18.7 | 15.8 | 17.6 | 20.9 | 22.2 |
| Fam193a  | 2.9  | 4.1  | 4.2  | 3.5  | 3.3  | 3.3   | 4.3   | 5.0  | 4.3  | 3.3  | 4.6  | 4.1  |
| Fam193b  | 3.3  | 3.6  | 3.2  | 3.1  | 3.1  | 4.0   | 3.6   | 3.0  | 3.9  | 3.0  | 2.7  | 2.7  |
| Fam194a  | 0.1  | 0.1  | 0.0  | 0.0  | 0.0  | 0.1   | 0.0   | 0.1  | 0.0  | 0.1  | 0.0  | 0.0  |
| Fam195a  | 3.9  | 2.7  | 2.7  | 4.1  | 2.7  | 3.7   | 2.6   | 2.2  | 3.8  | 3.0  | 2.9  | 2.3  |
| Fam195b  | 33.2 | 28.0 | 26.0 | 27.1 | 26.0 | 28.9  | 25.1  | 29.1 | 29.7 | 33.0 | 27.7 | 26.5 |
| Fam196a  | 0.4  | 0.4  | 0.3  | 0.1  | 0.4  | 0.2   | 0.2   | 0.3  | 0.2  | 0.4  | 0.3  | 0.2  |
| Fam196b  | 0.0  | 0.0  | 0.0  | 0.1  | 0.1  | 0.0   | 0.0   | 0.0  | 0.0  | 0.0  | 0.0  | 0.0  |
| Fam198a  | 0.1  | 0.1  | 0.2  | 0.1  | 0.1  | 0.1   | 0.1   | 0.2  | 0.2  | 0.1  | 0.0  | 0.0  |
| Fam198b  | 75.8 | 67.9 | 69.2 | 93.4 | 75.0 | 106.6 | 102.9 | 73.0 | 87.2 | 73.0 | 93.8 | 88.0 |
| Fam199x  | 1.7  | 2.3  | 2.8  | 2.2  | 2.0  | 2.0   | 2.0   | 2.3  | 1.9  | 2.3  | 2.3  | 2.4  |
| Fam19a1  | 0.0  | 0.0  | 0.0  | 0.0  | 0.0  | 0.0   | 0.0   | 0.0  | 0.0  | 0.0  | 0.0  | 0.0  |
| Fam19a2  | 0.0  | 0.0  | 0.0  | 0.0  | 0.0  | 0.0   | 0.0   | 0.0  | 0.0  | 0.0  | 0.0  | 0.0  |
| Fam19a3  | 0.0  | 0.0  | 0.0  | 0.0  | 0.1  | 0.0   | 0.0   | 0.0  | 0.0  | 0.0  | 0.0  | 0.0  |
| Fam19a5  | 1.9  | 1.7  | 0.9  | 1.3  | 1.3  | 2.4   | 3.1   | 2.3  | 2.2  | 2.0  | 2.5  | 2.3  |
| Fam203a  | 2.7  | 2.3  | 2.1  | 2.5  | 2.7  | 3.7   | 3.2   | 2.6  | 2.8  | 2.9  | 2.6  | 1.8  |
| Fam207a  | 8.9  | 9.1  | 8.1  | 9.3  | 9.7  | 9.6   | 8.5   | 9.3  | 9.4  | 10.6 | 8.3  | 9.1  |
| Fam209   | 0.0  | 0.3  | 0.1  | 0.0  | 0.2  | 0.2   | 0.1   | 0.1  | 0.0  | 0.4  | 0.0  | 0.2  |
| Fam20a   | 6.8  | 11.3 | 17.8 | 4.2  | 12.5 | 3.9   | 20.8  | 21.5 | 30.2 | 16.8 | 15.7 | 24.5 |
| Fam20b   | 28.3 | 27.1 | 23.9 | 31.7 | 24.0 | 30.9  | 25.5  | 20.1 | 23.6 | 23.2 | 25.5 | 25.9 |
| Fam20c   | 21.0 | 18.1 | 17.1 | 22.6 | 24.1 | 20.8  | 26.3  | 25.9 | 22.0 | 17.8 | 23.2 | 19.9 |
| Fam21    | 28.6 | 24.5 | 23.3 | 29.4 | 22.9 | 26.3  | 21.0  | 22.4 | 18.6 | 21.9 | 23.8 | 24.5 |
| Fam210a  | 4.0  | 4.3  | 4.3  | 3.6  | 3.8  | 4.3   | 3.9   | 3.8  | 4.3  | 5.3  | 4.5  | 5.0  |
| Fam210b  | 3.6  | 3.8  | 3.2  | 3.8  | 3.6  | 3.8   | 3.8   | 3.2  | 3.0  | 3.9  | 3.9  | 3.5  |
| Fam211a  | 18.4 | 18.4 | 13.7 | 19.2 | 12.3 | 21.9  | 16.8  | 13.1 | 16.0 | 12.3 | 17.1 | 11.6 |
| Fam211b  | 2.8  | 1.9  | 1.8  | 3.3  | 1.4  | 3.4   | 1.2   | 1.1  | 0.8  | 1.0  | 1.2  | 0.8  |
| Fam212a  | 4.9  | 6.2  | 5.2  | 6.5  | 6.0  | 5.9   | 7.1   | 6.9  | 5.5  | 4.2  | 5.2  | 4.0  |

Online Table 1

|         |      |      |      |      |      |      |      |      |      |      |      |      |
|---------|------|------|------|------|------|------|------|------|------|------|------|------|
| Fam212b | 6.5  | 5.4  | 4.0  | 6.5  | 5.7  | 6.2  | 5.7  | 2.8  | 4.0  | 6.3  | 5.9  | 5.5  |
| Fam213a | 8.1  | 5.4  | 4.7  | 8.4  | 4.3  | 8.9  | 3.7  | 4.5  | 3.0  | 5.7  | 5.7  | 5.5  |
| Fam213b | 19.0 | 18.7 | 12.4 | 15.3 | 13.0 | 19.0 | 9.3  | 14.0 | 12.9 | 13.9 | 13.9 | 12.0 |
| Fam214a | 9.0  | 10.9 | 10.9 | 7.2  | 8.4  | 8.7  | 7.0  | 7.0  | 8.3  | 9.0  | 8.2  | 8.1  |
| Fam214b | 20.3 | 19.6 | 14.9 | 20.7 | 20.2 | 18.2 | 21.3 | 16.9 | 19.6 | 17.3 | 19.2 | 17.6 |
| Fam216a | 21.4 | 22.0 | 21.3 | 24.1 | 18.4 | 22.3 | 19.3 | 18.3 | 16.5 | 24.1 | 20.4 | 18.7 |
| Fam217a | 0.1  | 0.1  | 0.1  | 0.0  | 0.0  | 0.0  | 0.0  | 0.1  | 0.0  | 0.0  | 0.1  | 0.1  |
| Fam217b | 0.9  | 0.2  | 0.4  | 0.8  | 0.9  | 0.6  | 0.5  | 0.4  | 0.4  | 1.0  | 0.7  | 0.9  |
| Fam219a | 5.4  | 4.8  | 3.2  | 6.4  | 4.1  | 4.9  | 5.5  | 3.5  | 4.0  | 3.5  | 4.4  | 3.1  |
| Fam219b | 13.2 | 11.7 | 9.1  | 14.2 | 11.3 | 13.6 | 12.1 | 8.3  | 10.1 | 10.7 | 9.9  | 10.9 |
| Fam220a | 17.3 | 18.5 | 15.3 | 17.0 | 13.4 | 22.9 | 13.9 | 12.4 | 12.8 | 13.4 | 16.5 | 13.7 |
| Fam221a | 0.5  | 0.8  | 0.8  | 0.3  | 0.6  | 0.8  | 0.5  | 0.4  | 0.3  | 0.4  | 0.3  | 0.4  |
| Fam221b | 0.1  | 0.1  | 0.1  | 0.1  | 0.0  | 0.2  | 0.0  | 0.0  | 0.0  | 0.0  | 0.1  | 0.1  |
| Fam222a | 0.0  | 0.0  | 0.0  | 0.0  | 0.0  | 0.0  | 0.0  | 0.0  | 0.0  | 0.0  | 0.0  | 0.0  |
| Fam222b | 2.8  | 2.8  | 3.1  | 3.4  | 3.4  | 2.8  | 3.5  | 2.8  | 3.0  | 3.0  | 2.9  | 2.7  |
| Fam227a | 0.2  | 0.3  | 0.2  | 0.1  | 0.2  | 0.2  | 0.2  | 0.2  | 0.1  | 0.2  | 0.2  | 0.2  |
| Fam227b | 0.0  | 0.0  | 0.1  | 0.0  | 0.0  | 0.0  | 0.0  | 0.1  | 0.0  | 0.1  | 0.1  | 0.0  |
| Fam228a | 0.1  | 0.0  | 0.1  | 0.1  | 0.1  | 0.1  | 0.0  | 0.0  | 0.0  | 0.0  | 0.0  | 0.0  |
| Fam228b | 0.2  | 0.2  | 0.3  | 0.3  | 0.2  | 0.5  | 0.2  | 0.1  | 0.3  | 0.3  | 0.2  | 0.2  |
| Fam229b | 5.3  | 4.6  | 4.3  | 3.9  | 3.0  | 4.9  | 3.1  | 4.7  | 3.8  | 3.9  | 4.0  | 3.8  |
| Fam25c  | 0.4  | 0.3  | 0.5  | 0.0  | 0.4  | 0.5  | 0.6  | 1.1  | 0.1  | 0.2  | 1.0  | 0.2  |
| Fam26d  | 0.1  | 0.0  | 0.0  | 0.0  | 0.0  | 0.0  | 0.0  | 0.0  | 0.0  | 0.0  | 0.0  | 0.0  |
| Fam26e  | 26.8 | 25.5 | 23.7 | 19.8 | 16.0 | 22.1 | 15.1 | 13.1 | 16.1 | 14.7 | 19.6 | 22.0 |
| Fam26f  | 0.4  | 0.7  | 1.1  | 0.8  | 0.8  | 0.7  | 0.4  | 0.5  | 0.7  | 0.4  | 0.1  | 0.7  |
| Fam32a  | 43.6 | 37.7 | 35.2 | 55.2 | 36.0 | 46.3 | 40.4 | 33.4 | 30.4 | 35.5 | 39.3 | 43.3 |
| Fam35a  | 3.2  | 3.5  | 3.6  | 2.3  | 3.0  | 3.0  | 2.7  | 3.0  | 3.4  | 3.3  | 3.1  | 3.7  |
| Fam3a   | 13.6 | 12.1 | 12.0 | 13.8 | 12.8 | 14.3 | 13.9 | 14.1 | 15.3 | 14.3 | 12.7 | 13.2 |
| Fam3c   | 23.8 | 18.9 | 22.9 | 28.2 | 23.4 | 24.3 | 27.1 | 20.3 | 19.2 | 24.8 | 26.6 | 28.4 |
| Fam43a  | 6.9  | 5.9  | 6.6  | 3.5  | 3.3  | 3.5  | 3.1  | 4.0  | 3.0  | 4.3  | 3.7  | 4.2  |
| Fam43b  | 0.0  | 0.0  | 0.0  | 0.1  | 0.0  | 0.0  | 0.0  | 0.0  | 0.0  | 0.0  | 0.0  | 0.0  |
| Fam45a  | 13.4 | 13.5 | 13.6 | 18.6 | 15.2 | 16.2 | 12.9 | 14.1 | 12.9 | 14.2 | 17.5 | 14.7 |
| Fam46a  | 1.9  | 2.8  | 6.3  | 1.6  | 2.8  | 1.4  | 2.3  | 5.4  | 3.1  | 3.4  | 1.9  | 4.6  |
| Fam46b  | 3.2  | 3.3  | 2.5  | 1.3  | 2.1  | 1.5  | 3.6  | 3.7  | 4.6  | 4.2  | 5.3  | 3.3  |
| Fam46c  | 0.5  | 0.4  | 0.3  | 0.6  | 1.2  | 0.2  | 0.4  | 0.2  | 0.5  | 3.1  | 0.7  | 0.7  |
| Fam49a  | 9.3  | 8.9  | 9.6  | 11.2 | 11.1 | 7.6  | 9.0  | 7.4  | 7.8  | 13.4 | 11.1 | 9.2  |
| Fam49b  | 4.7  | 4.0  | 3.8  | 5.7  | 8.2  | 4.4  | 4.7  | 4.1  | 4.1  | 5.0  | 5.3  | 4.7  |
| Fam50a  | 56.5 | 39.3 | 33.2 | 89.3 | 33.3 | 72.1 | 31.3 | 27.3 | 24.0 | 31.4 | 37.4 | 39.7 |
| Fam53a  | 8.9  | 9.1  | 8.2  | 10.5 | 7.6  | 10.8 | 8.1  | 8.7  | 9.1  | 8.4  | 9.1  | 8.3  |
| Fam53b  | 4.2  | 6.2  | 6.2  | 4.3  | 5.6  | 5.1  | 4.2  | 4.0  | 4.1  | 3.0  | 3.3  | 3.2  |
| Fam53c  | 5.5  | 6.1  | 5.1  | 6.3  | 6.5  | 5.6  | 5.6  | 5.2  | 5.4  | 5.0  | 4.6  | 4.2  |
| Fam57a  | 2.1  | 2.1  | 2.9  | 2.9  | 2.8  | 2.3  | 5.0  | 3.8  | 3.5  | 2.9  | 3.1  | 2.8  |
| Fam57b  | 0.3  | 0.3  | 0.2  | 0.2  | 0.1  | 0.3  | 0.0  | 0.2  | 0.2  | 0.2  | 0.4  | 0.1  |
| Fam58b  | 9.6  | 8.8  | 7.8  | 9.0  | 8.2  | 8.9  | 8.1  | 10.0 | 8.3  | 8.8  | 6.7  | 8.3  |
| Fam5b   | 0.0  | 0.0  | 0.1  | 0.0  | 0.0  | 0.0  | 0.0  | 0.1  | 0.0  | 0.0  | 0.0  | 0.0  |
| Fam5c   | 0.0  | 0.0  | 0.0  | 0.0  | 0.0  | 0.0  | 0.0  | 0.0  | 0.0  | 0.0  | 0.0  | 0.0  |
| Fam60a  | 2.8  | 2.7  | 2.0  | 4.0  | 4.0  | 3.1  | 3.0  | 2.2  | 3.2  | 4.7  | 4.4  | 3.0  |
| Fam63a  | 11.0 | 11.0 | 10.2 | 11.5 | 11.4 | 8.3  | 13.2 | 14.8 | 11.8 | 11.9 | 11.9 | 11.8 |
| Fam63b  | 14.5 | 17.1 | 17.1 | 13.6 | 15.9 | 13.7 | 16.3 | 16.7 | 17.3 | 12.4 | 17.9 | 18.2 |
| Fam64a  | 2.6  | 4.8  | 6.1  | 0.6  | 6.3  | 0.7  | 11.3 | 2.5  | 7.4  | 3.2  | 6.2  | 2.9  |
| Fam65a  | 2.4  | 3.1  | 2.7  | 2.7  | 2.6  | 3.0  | 2.9  | 2.7  | 2.6  | 3.2  | 2.3  | 2.4  |
| Fam65b  | 1.6  | 2.4  | 1.8  | 1.3  | 2.0  | 3.8  | 3.7  | 4.3  | 4.5  | 1.4  | 2.7  | 1.9  |
| Fam65c  | 1.6  | 5.1  | 6.3  | 1.1  | 2.0  | 1.1  | 1.9  | 4.6  | 3.9  | 1.2  | 1.3  | 1.8  |
| Fam69a  | 10.2 | 10.4 | 10.0 | 9.5  | 11.0 | 7.9  | 7.9  | 8.8  | 9.2  | 11.9 | 11.5 | 9.7  |
| Fam69b  | 9.0  | 7.4  | 5.7  | 8.3  | 5.8  | 13.2 | 6.3  | 5.1  | 5.9  | 7.4  | 5.3  | 6.3  |
| Fam69c  | 0.0  | 0.1  | 0.0  | 0.0  | 0.1  | 0.1  | 0.0  | 0.0  | 0.0  | 0.0  | 0.0  | 0.0  |
| Fam71d  | 0.0  | 0.0  | 0.0  | 0.1  | 0.0  | 0.0  | 0.0  | 0.0  | 0.0  | 0.0  | 0.0  | 0.0  |
| Fam71e1 | 0.3  | 0.5  | 0.4  | 0.3  | 0.3  | 0.7  | 0.3  | 0.4  | 0.5  | 0.4  | 0.2  | 0.2  |

Online Table 1

|         |       |       |       |       |       |       |       |       |       |       |       |       |
|---------|-------|-------|-------|-------|-------|-------|-------|-------|-------|-------|-------|-------|
| Fam71f1 | 0.3   | 0.3   | 0.1   | 0.4   | 0.3   | 0.2   | 0.1   | 0.1   | 0.1   | 0.2   | 0.1   | 0.1   |
| Fam71f2 | 0.1   | 0.1   | 0.1   | 0.2   | 0.0   | 0.0   | 0.1   | 0.1   | 0.2   | 0.1   | 0.0   | 0.1   |
| Fam72a  | 1.6   | 2.1   | 1.3   | 1.0   | 1.4   | 1.5   | 1.4   | 1.9   | 2.1   | 1.4   | 1.6   | 1.2   |
| Fam73a  | 0.8   | 0.6   | 0.6   | 0.7   | 0.4   | 0.9   | 0.5   | 0.4   | 0.4   | 1.1   | 0.5   | 0.6   |
| Fam73b  | 7.7   | 7.9   | 6.3   | 7.0   | 7.4   | 6.7   | 7.5   | 6.4   | 7.8   | 7.6   | 7.0   | 5.9   |
| Fam76a  | 11.7  | 13.8  | 14.6  | 11.1  | 12.1  | 13.2  | 11.8  | 14.9  | 13.5  | 12.5  | 13.8  | 14.6  |
| Fam76b  | 2.5   | 2.9   | 4.5   | 3.3   | 3.6   | 2.8   | 3.6   | 3.8   | 3.2   | 2.8   | 3.4   | 3.4   |
| Fam78a  | 0.1   | 0.1   | 0.0   | 0.1   | 0.3   | 0.0   | 0.1   | 0.1   | 0.0   | 0.0   | 0.1   | 0.0   |
| Fam78b  | 0.4   | 0.2   | 0.3   | 0.9   | 0.6   | 0.8   | 0.5   | 0.3   | 0.4   | 0.5   | 0.4   | 0.4   |
| Fam81a  | 0.4   | 0.3   | 0.5   | 0.4   | 0.4   | 0.2   | 0.4   | 0.0   | 0.2   | 0.2   | 0.3   | 0.2   |
| Fam83a  | 0.5   | 0.5   | 1.2   | 0.1   | 0.3   | 0.1   | 0.1   | 1.2   | 0.4   | 0.8   | 0.8   | 1.1   |
| Fam83c  | 0.0   | 0.1   | 0.1   | 0.3   | 0.1   | 0.0   | 0.2   | 0.0   | 0.1   | 0.1   | 0.1   | 0.0   |
| Fam83d  | 2.5   | 3.2   | 5.7   | 0.9   | 4.2   | 1.0   | 5.8   | 4.5   | 5.1   | 3.2   | 3.8   | 4.0   |
| Fam83e  | 0.0   | 0.0   | 0.0   | 0.0   | 0.0   | 0.1   | 0.0   | 0.0   | 0.1   | 0.0   | 0.0   | 0.0   |
| Fam83f  | 0.0   | 0.0   | 0.0   | 0.2   | 0.4   | 0.1   | 0.0   | 0.0   | 0.0   | 0.0   | 0.0   | 0.0   |
| Fam83g  | 0.2   | 0.2   | 0.1   | 0.1   | 0.1   | 0.1   | 0.1   | 0.1   | 0.1   | 0.2   | 0.2   | 0.1   |
| Fam83h  | 1.9   | 1.6   | 1.7   | 1.5   | 1.8   | 1.9   | 1.5   | 1.6   | 1.9   | 1.9   | 1.5   | 1.5   |
| Fam84a  | 0.1   | 0.1   | 0.1   | 0.0   | 0.0   | 0.0   | 0.1   | 0.1   | 0.2   | 1.6   | 0.7   | 0.3   |
| Fam84b  | 1.2   | 0.8   | 1.0   | 1.0   | 0.9   | 1.0   | 0.6   | 0.9   | 0.8   | 1.6   | 1.2   | 1.2   |
| Fam86   | 7.1   | 6.8   | 5.4   | 6.9   | 6.6   | 6.9   | 6.1   | 6.7   | 7.0   | 6.7   | 7.5   | 5.8   |
| Fam89a  | 0.2   | 0.1   | 0.1   | 0.1   | 0.2   | 0.1   | 0.0   | 0.1   | 0.2   | 0.1   | 0.0   | 0.1   |
| Fam89b  | 17.4  | 14.3  | 13.5  | 20.7  | 17.9  | 16.9  | 18.8  | 17.2  | 19.9  | 20.8  | 17.2  | 15.6  |
| Fam92a  | 37.1  | 32.7  | 36.8  | 35.5  | 23.9  | 41.9  | 29.4  | 28.7  | 24.5  | 31.1  | 38.8  | 37.8  |
| Fam96a  | 18.2  | 16.3  | 15.9  | 18.9  | 25.7  | 15.8  | 15.8  | 15.5  | 16.3  | 16.4  | 17.4  | 17.5  |
| Fam96b  | 29.1  | 25.8  | 28.7  | 31.8  | 25.5  | 31.8  | 30.1  | 26.6  | 27.7  | 24.5  | 26.2  | 30.2  |
| Fam98a  | 17.1  | 15.3  | 15.9  | 21.0  | 15.7  | 16.1  | 16.5  | 14.2  | 12.2  | 14.0  | 16.9  | 16.8  |
| Fam98b  | 2.5   | 2.2   | 3.1   | 2.3   | 2.7   | 2.6   | 2.9   | 2.5   | 2.8   | 3.1   | 2.5   | 2.9   |
| Fam98c  | 4.2   | 3.1   | 2.9   | 2.7   | 3.1   | 3.1   | 3.6   | 3.3   | 3.6   | 3.6   | 2.2   | 3.2   |
| Fan1    | 3.5   | 3.1   | 2.9   | 2.9   | 2.9   | 3.7   | 2.8   | 2.8   | 2.1   | 2.7   | 2.8   | 2.3   |
| Fanca   | 0.9   | 1.2   | 1.3   | 0.6   | 1.3   | 0.4   | 1.8   | 0.9   | 1.4   | 0.9   | 1.3   | 0.8   |
| FanCb   | 0.9   | 1.5   | 1.6   | 0.6   | 1.3   | 0.8   | 1.6   | 0.8   | 1.3   | 0.9   | 1.5   | 1.3   |
| Fancc   | 2.1   | 2.7   | 3.0   | 1.4   | 2.7   | 1.9   | 2.6   | 3.6   | 3.5   | 2.4   | 2.2   | 2.7   |
| FanCd2  | 0.6   | 1.2   | 1.6   | 0.1   | 1.3   | 0.2   | 1.7   | 0.6   | 1.3   | 0.6   | 0.9   | 0.8   |
| Fance   | 3.3   | 4.3   | 4.2   | 3.0   | 3.3   | 3.8   | 3.3   | 4.4   | 4.1   | 4.6   | 4.0   | 4.2   |
| FanCf   | 1.0   | 1.3   | 1.2   | 1.3   | 1.1   | 1.5   | 1.4   | 1.8   | 1.4   | 1.2   | 1.1   | 1.2   |
| FanCg   | 1.7   | 2.3   | 2.3   | 1.5   | 2.2   | 1.4   | 1.8   | 1.8   | 2.4   | 1.6   | 1.9   | 1.7   |
| Fanci   | 0.5   | 0.8   | 1.5   | 0.3   | 1.3   | 0.2   | 1.2   | 0.7   | 1.0   | 0.5   | 0.9   | 0.7   |
| FanCl   | 2.2   | 2.3   | 3.4   | 1.9   | 2.4   | 2.2   | 2.6   | 2.3   | 2.2   | 2.2   | 2.0   | 2.0   |
| FanCm   | 1.7   | 2.3   | 2.3   | 1.4   | 1.8   | 1.4   | 2.0   | 1.8   | 2.0   | 1.8   | 2.0   | 1.7   |
| Fank1   | 0.1   | 0.1   | 0.1   | 0.0   | 0.1   | 0.1   | 0.1   | 0.1   | 0.0   | 0.1   | 0.0   | 0.0   |
| Fap     | 0.2   | 0.6   | 1.5   | 0.2   | 0.6   | 0.0   | 0.5   | 1.1   | 1.3   | 1.0   | 0.4   | 0.9   |
| Far1    | 15.6  | 16.5  | 17.0  | 18.3  | 18.0  | 16.2  | 19.0  | 18.4  | 20.0  | 16.4  | 21.9  | 19.8  |
| Far2    | 0.1   | 0.1   | 0.1   | 0.1   | 0.1   | 0.1   | 0.3   | 0.1   | 0.2   | 0.1   | 0.2   | 0.2   |
| Farp1   | 16.1  | 14.8  | 12.4  | 12.3  | 13.3  | 14.8  | 16.1  | 13.5  | 14.8  | 16.7  | 15.2  | 13.2  |
| Farp2   | 2.4   | 2.3   | 2.3   | 2.3   | 2.3   | 1.8   | 2.3   | 2.5   | 2.1   | 2.9   | 2.8   | 2.2   |
| Fars2   | 7.3   | 6.7   | 5.1   | 6.4   | 6.0   | 6.7   | 5.3   | 5.7   | 5.8   | 6.5   | 6.4   | 5.7   |
| Farsa   | 14.7  | 14.2  | 12.4  | 15.5  | 14.6  | 13.9  | 15.7  | 15.5  | 14.6  | 13.8  | 13.5  | 12.8  |
| Farsb   | 25.5  | 24.5  | 17.6  | 29.0  | 23.6  | 23.1  | 19.1  | 19.9  | 20.2  | 22.4  | 24.3  | 19.4  |
| Fas     | 54.7  | 51.5  | 51.2  | 59.1  | 70.5  | 43.9  | 41.0  | 40.5  | 39.6  | 36.6  | 44.6  | 49.4  |
| Fasl    | 0.0   | 0.0   | 0.0   | 0.0   | 0.0   | 0.0   | 0.0   | 0.0   | 0.0   | 0.0   | 0.0   | 0.0   |
| Fasn    | 15.6  | 16.0  | 12.5  | 10.7  | 15.1  | 10.5  | 28.3  | 22.1  | 21.9  | 12.2  | 19.1  | 10.4  |
| Fastk   | 16.4  | 15.8  | 13.8  | 18.2  | 14.5  | 19.1  | 14.7  | 16.0  | 15.1  | 13.2  | 15.1  | 12.6  |
| Fastkd1 | 2.2   | 2.3   | 1.9   | 1.9   | 1.9   | 2.3   | 2.0   | 2.1   | 2.1   | 2.0   | 1.7   | 2.2   |
| Fastkd2 | 4.3   | 3.7   | 2.8   | 6.1   | 4.2   | 5.5   | 3.6   | 3.7   | 3.5   | 4.5   | 4.9   | 3.9   |
| Fastkd3 | 2.3   | 2.8   | 2.6   | 2.7   | 4.5   | 2.1   | 2.4   | 2.6   | 3.0   | 2.5   | 2.0   | 2.8   |
| Fastkd5 | 3.6   | 3.3   | 2.7   | 3.6   | 3.4   | 3.1   | 3.5   | 3.3   | 3.3   | 3.6   | 3.6   | 3.2   |
| Fat1    | 117.9 | 134.6 | 135.8 | 100.6 | 109.8 | 114.6 | 182.1 | 125.3 | 151.2 | 101.3 | 119.5 | 123.9 |

Online Table 1

|        |        |       |       |       |       |       |        |        |        |       |       |       |
|--------|--------|-------|-------|-------|-------|-------|--------|--------|--------|-------|-------|-------|
| Fat2   | 0.1    | 0.1   | 0.1   | 0.0   | 0.1   | 0.0   | 0.0    | 0.0    | 0.0    | 0.0   | 0.0   | 0.0   |
| Fat3   | 0.1    | 0.0   | 0.0   | 0.9   | 1.3   | 0.0   | 0.1    | 0.0    | 0.0    | 0.0   | 0.0   | 0.1   |
| Fat4   | 1.4    | 2.1   | 2.6   | 1.4   | 1.7   | 1.3   | 3.0    | 2.7    | 3.3    | 1.9   | 2.4   | 2.4   |
| Fau    | 504.2  | 438.2 | 446.7 | 464.0 | 453.3 | 463.5 | 435.8  | 564.4  | 450.9  | 491.7 | 502.7 | 474.3 |
| Faxc   | 2.2    | 2.1   | 2.0   | 2.6   | 1.9   | 3.1   | 2.1    | 1.5    | 1.7    | 1.7   | 2.0   | 1.7   |
| Fbf1   | 9.0    | 8.8   | 8.1   | 9.9   | 7.2   | 11.8  | 8.8    | 6.8    | 7.1    | 8.8   | 8.5   | 8.2   |
| Fbl    | 17.4   | 13.8  | 14.1  | 14.3  | 17.3  | 15.8  | 16.8   | 15.4   | 12.7   | 17.3  | 15.2  | 15.6  |
| Fblim1 | 10.5   | 9.6   | 9.4   | 16.8  | 15.7  | 11.8  | 13.8   | 9.5    | 12.6   | 9.5   | 10.6  | 8.1   |
| Fbl1   | 0.0    | 0.0   | 0.0   | 0.0   | 0.0   | 0.0   | 0.0    | 0.0    | 0.0    | 0.0   | 0.1   | 0.0   |
| Fbln1  | 3.0    | 8.6   | 30.2  | 1.2   | 5.4   | 2.2   | 5.6    | 17.0   | 9.5    | 6.5   | 5.1   | 8.9   |
| Fbln2  | 1000.8 | 930.2 | 905.6 | 687.1 | 959.0 | 795.5 | 1128.7 | 1590.9 | 1269.1 | 822.8 | 964.5 | 953.7 |
| Fbln5  | 25.1   | 23.8  | 28.1  | 23.2  | 19.2  | 21.6  | 22.9   | 30.0   | 22.6   | 39.0  | 34.3  | 27.1  |
| Fbln7  | 0.8    | 1.0   | 0.9   | 0.7   | 0.6   | 0.6   | 0.6    | 0.3    | 1.0    | 0.9   | 0.7   | 1.1   |
| Fbn1   | 167.6  | 214.1 | 289.4 | 126.7 | 213.2 | 144.3 | 257.8  | 454.6  | 312.7  | 189.5 | 230.6 | 243.4 |
| Fbn2   | 0.0    | 0.1   | 0.2   | 0.0   | 0.1   | 0.0   | 0.0    | 0.2    | 0.1    | 0.1   | 0.2   | 0.1   |
| Fbrs   | 1.9    | 2.7   | 2.3   | 2.1   | 2.4   | 2.0   | 3.1    | 2.1    | 3.0    | 1.9   | 2.3   | 1.8   |
| Fbrs1  | 1.0    | 1.3   | 1.2   | 1.0   | 1.5   | 1.0   | 1.2    | 1.2    | 0.9    | 1.0   | 1.1   | 0.8   |
| Fbx12  | 2.1    | 2.0   | 2.0   | 2.1   | 2.3   | 2.4   | 1.7    | 2.4    | 2.5    | 2.1   | 2.1   | 1.5   |
| Fbx13  | 0.0    | 0.1   | 0.2   | 0.0   | 0.1   | 0.0   | 0.1    | 0.4    | 0.1    | 0.0   | 0.1   | 0.0   |
| Fbx14  | 5.7    | 5.1   | 5.4   | 6.1   | 5.1   | 5.5   | 5.3    | 5.0    | 5.5    | 5.3   | 4.8   | 4.9   |
| Fbx15  | 1.4    | 0.9   | 1.0   | 0.9   | 0.9   | 1.1   | 1.2    | 1.7    | 1.7    | 2.1   | 1.7   | 1.2   |
| Fbx16  | 1.0    | 1.2   | 1.1   | 1.9   | 0.8   | 1.5   | 1.3    | 0.9    | 1.4    | 1.8   | 1.4   | 1.3   |
| Fbx17  | 1.1    | 1.5   | 1.1   | 1.1   | 1.1   | 1.2   | 1.0    | 1.0    | 1.1    | 1.1   | 1.1   | 1.0   |
| Fbx18  | 2.7    | 3.3   | 3.2   | 3.1   | 3.1   | 3.0   | 3.4    | 3.3    | 3.0    | 2.5   | 2.4   | 2.1   |
| Fbx19  | 3.1    | 3.7   | 3.7   | 3.0   | 3.0   | 3.1   | 3.5    | 3.3    | 3.9    | 3.5   | 2.7   | 3.1   |
| Fbx12  | 2.6    | 1.8   | 1.3   | 3.6   | 1.6   | 3.2   | 1.9    | 1.3    | 1.4    | 1.0   | 1.4   | 1.6   |
| Fbx120 | 9.1    | 9.3   | 9.2   | 8.1   | 8.1   | 9.1   | 8.4    | 8.4    | 8.5    | 9.2   | 9.0   | 9.2   |
| Fbx121 | 1.5    | 1.2   | 1.0   | 1.0   | 1.0   | 1.6   | 1.1    | 0.7    | 0.6    | 0.9   | 0.6   | 0.8   |
| Fbx122 | 0.3    | 0.4   | 0.5   | 0.5   | 0.5   | 0.3   | 0.5    | 0.4    | 0.5    | 0.5   | 1.0   | 0.6   |
| Fbx13  | 14.7   | 15.3  | 15.5  | 16.1  | 13.8  | 17.3  | 12.5   | 14.5   | 14.3   | 13.6  | 15.3  | 15.6  |
| Fbx14  | 11.2   | 8.7   | 6.5   | 10.3  | 7.6   | 11.0  | 8.0    | 7.0    | 7.4    | 7.6   | 8.2   | 7.5   |
| Fbx15  | 14.0   | 15.6  | 15.6  | 12.9  | 14.0  | 13.6  | 14.7   | 14.8   | 16.0   | 15.8  | 17.3  | 17.4  |
| Fbx16  | 8.3    | 7.6   | 7.2   | 5.4   | 7.3   | 6.9   | 7.2    | 8.6    | 8.8    | 7.8   | 6.1   | 6.0   |
| Fbx17  | 1.1    | 0.9   | 0.8   | 1.0   | 1.1   | 1.2   | 1.2    | 1.3    | 1.4    | 1.1   | 1.2   | 1.2   |
| Fbx18  | 3.2    | 2.9   | 2.9   | 2.3   | 2.8   | 3.1   | 3.1    | 3.8    | 3.9    | 2.9   | 2.8   | 2.9   |
| Fbxo10 | 3.2    | 3.5   | 4.4   | 3.2   | 2.7   | 3.2   | 3.8    | 4.2    | 3.8    | 3.1   | 3.6   | 4.1   |
| Fbxo11 | 5.1    | 6.8   | 7.0   | 6.7   | 5.8   | 6.7   | 5.7    | 6.2    | 5.5    | 5.9   | 6.8   | 6.2   |
| Fbxo15 | 0.1    | 0.1   | 0.2   | 0.2   | 0.1   | 0.2   | 0.0    | 0.0    | 0.0    | 0.1   | 0.0   | 0.1   |
| Fbxo16 | 0.3    | 0.3   | 0.1   | 0.2   | 0.2   | 0.2   | 0.1    | 0.1    | 0.1    | 0.4   | 0.4   | 0.1   |
| Fbxo17 | 5.4    | 3.9   | 3.0   | 4.3   | 3.6   | 3.6   | 4.7    | 3.8    | 3.8    | 3.1   | 3.2   | 3.3   |
| Fbxo18 | 29.8   | 29.7  | 27.9  | 26.8  | 25.8  | 29.1  | 28.5   | 28.4   | 29.6   | 28.3  | 29.2  | 30.5  |
| Fbxo2  | 0.3    | 0.3   | 0.2   | 0.3   | 0.3   | 0.3   | 0.3    | 0.4    | 0.4    | 1.1   | 0.7   | 0.3   |
| Fbxo21 | 10.7   | 10.3  | 9.6   | 10.6  | 8.3   | 13.0  | 9.3    | 9.3    | 9.1    | 8.7   | 8.2   | 8.5   |
| Fbxo22 | 13.9   | 14.9  | 15.6  | 18.7  | 15.1  | 16.6  | 16.3   | 16.0   | 14.8   | 14.9  | 16.5  | 15.5  |
| Fbxo24 | 0.4    | 0.1   | 0.2   | 0.5   | 0.2   | 0.4   | 0.3    | 0.3    | 0.4    | 0.2   | 0.1   | 0.2   |
| Fbxo25 | 30.6   | 25.4  | 20.6  | 28.7  | 23.7  | 28.6  | 26.4   | 26.1   | 25.3   | 26.6  | 25.9  | 23.4  |
| Fbxo27 | 0.1    | 0.1   | 0.0   | 0.0   | 0.1   | 0.1   | 0.0    | 0.2    | 0.2    | 0.1   | 0.2   | 0.1   |
| Fbxo28 | 14.2   | 13.1  | 11.1  | 15.0  | 10.2  | 13.1  | 10.1   | 9.4    | 9.8    | 11.6  | 11.2  | 11.5  |
| Fbxo3  | 35.1   | 34.6  | 33.6  | 31.0  | 29.2  | 34.5  | 30.3   | 27.7   | 29.2   | 32.7  | 32.3  | 31.6  |
| Fbxo30 | 4.7    | 5.2   | 5.1   | 4.7   | 4.9   | 5.7   | 4.7    | 4.6    | 5.6    | 5.3   | 5.7   | 5.1   |
| Fbxo31 | 3.3    | 3.0   | 3.0   | 3.1   | 2.3   | 3.1   | 2.8    | 3.1    | 2.8    | 2.8   | 2.9   | 2.5   |
| Fbxo32 | 5.7    | 5.4   | 4.7   | 5.4   | 10.0  | 4.1   | 8.3    | 5.2    | 8.2    | 9.1   | 8.9   | 12.3  |
| Fbxo33 | 6.2    | 6.1   | 5.2   | 7.0   | 6.7   | 6.5   | 5.7    | 5.1    | 5.9    | 7.2   | 6.8   | 5.9   |
| Fbxo34 | 6.0    | 6.4   | 5.9   | 6.2   | 6.5   | 5.6   | 5.9    | 5.0    | 5.8    | 6.0   | 5.8   | 5.8   |
| Fbxo36 | 4.3    | 5.5   | 4.7   | 3.1   | 3.7   | 6.8   | 4.2    | 5.9    | 4.6    | 4.2   | 4.6   | 5.1   |
| Fbxo38 | 15.5   | 16.0  | 16.4  | 15.7  | 14.0  | 15.0  | 14.2   | 15.9   | 15.0   | 16.5  | 15.5  | 18.3  |
| Fbxo4  | 7.5    | 7.1   | 6.9   | 6.2   | 5.3   | 6.6   | 6.3    | 7.1    | 6.3    | 5.0   | 6.5   | 6.3   |

Online Table 1

|         |      |       |       |      |       |      |       |       |       |      |       |      |
|---------|------|-------|-------|------|-------|------|-------|-------|-------|------|-------|------|
| Fbxo40  | 0.0  | 0.0   | 0.0   | 0.1  | 0.1   | 0.0  | 0.0   | 0.0   | 0.0   | 0.0  | 0.0   | 0.1  |
| Fbxo41  | 0.3  | 0.4   | 0.2   | 0.3  | 0.2   | 0.2  | 0.2   | 0.2   | 0.2   | 0.1  | 0.2   | 0.1  |
| Fbxo42  | 4.3  | 4.6   | 4.2   | 4.0  | 4.4   | 4.5  | 4.5   | 3.7   | 4.3   | 4.0  | 4.4   | 3.6  |
| Fbxo43  | 0.0  | 0.0   | 0.0   | 0.0  | 0.0   | 0.0  | 0.0   | 0.0   | 0.0   | 0.0  | 0.0   | 0.0  |
| Fbxo44  | 2.5  | 3.1   | 2.0   | 3.3  | 1.7   | 3.6  | 1.6   | 1.4   | 1.8   | 2.9  | 2.6   | 2.3  |
| Fbxo45  | 3.7  | 4.4   | 4.2   | 4.0  | 4.2   | 3.9  | 3.6   | 3.6   | 3.8   | 4.0  | 4.7   | 4.1  |
| Fbxo46  | 2.0  | 2.0   | 2.1   | 1.8  | 2.1   | 1.6  | 2.3   | 2.2   | 2.5   | 2.4  | 2.1   | 2.1  |
| Fbxo47  | 0.3  | 0.3   | 0.4   | 0.4  | 0.3   | 0.3  | 0.3   | 0.4   | 0.2   | 0.3  | 0.3   | 0.2  |
| Fbxo48  | 0.2  | 0.4   | 0.6   | 0.0  | 0.6   | 0.0  | 0.5   | 0.1   | 0.4   | 0.2  | 0.4   | 0.1  |
| Fbxo5   | 1.5  | 2.4   | 3.6   | 0.8  | 3.2   | 0.8  | 5.1   | 2.4   | 3.1   | 1.7  | 3.9   | 2.1  |
| Fbxo6   | 30.9 | 27.3  | 21.4  | 30.8 | 21.6  | 30.7 | 22.6  | 24.4  | 24.8  | 24.3 | 26.6  | 23.1 |
| Fbxo7   | 7.4  | 7.2   | 7.8   | 5.6  | 7.3   | 6.5  | 7.2   | 8.8   | 8.1   | 8.5  | 8.0   | 8.5  |
| Fbxo8   | 7.2  | 7.6   | 7.5   | 8.6  | 6.9   | 7.8  | 7.2   | 6.4   | 7.4   | 7.3  | 8.8   | 8.6  |
| Fbxo9   | 11.8 | 8.6   | 8.9   | 12.9 | 10.6  | 8.0  | 13.0  | 12.2  | 13.9  | 12.0 | 12.1  | 12.7 |
| Fbxw10  | 0.6  | 0.8   | 1.1   | 0.7  | 0.5   | 0.6  | 0.7   | 0.6   | 0.4   | 0.4  | 0.7   | 0.9  |
| Fbxw11  | 20.2 | 20.6  | 18.2  | 20.1 | 19.8  | 19.8 | 18.3  | 16.8  | 18.6  | 18.0 | 19.8  | 18.4 |
| Fbxw15  | 0.0  | 0.1   | 0.0   | 0.0  | 0.1   | 0.0  | 0.0   | 0.0   | 0.0   | 0.2  | 0.1   | 0.0  |
| Fbxw16  | 0.0  | 0.1   | 0.1   | 0.0  | 0.0   | 0.0  | 0.1   | 0.0   | 0.0   | 0.0  | 0.1   | 0.0  |
| Fbxw17  | 7.9  | 4.9   | 6.1   | 6.6  | 5.7   | 7.6  | 6.0   | 5.1   | 6.7   | 5.8  | 5.4   | 5.0  |
| Fbxw18  | 0.5  | 0.2   | 0.0   | 0.6  | 0.3   | 0.3  | 0.7   | 0.1   | 0.3   | 0.4  | 0.4   | 0.1  |
| Fbxw19  | 0.0  | 0.1   | 0.0   | 0.0  | 0.0   | 0.0  | 0.0   | 0.0   | 0.0   | 0.0  | 0.0   | 0.0  |
| Fbxw2   | 23.0 | 20.4  | 20.3  | 25.5 | 19.7  | 24.7 | 21.8  | 20.4  | 20.9  | 21.1 | 21.0  | 22.0 |
| Fbxw21  | 0.0  | 0.0   | 0.0   | 0.0  | 0.0   | 0.1  | 0.0   | 0.0   | 0.0   | 0.0  | 0.0   | 0.0  |
| Fbxw24  | 0.1  | 0.1   | 0.0   | 0.0  | 0.1   | 0.1  | 0.2   | 0.1   | 0.1   | 0.2  | 0.2   | 0.0  |
| Fbxw26  | 0.1  | 0.0   | 0.0   | 0.1  | 0.0   | 0.0  | 0.1   | 0.0   | 0.1   | 0.0  | 0.0   | 0.1  |
| Fbxw4   | 6.7  | 6.5   | 5.3   | 5.4  | 5.8   | 5.7  | 3.8   | 4.8   | 4.3   | 5.3  | 4.8   | 4.8  |
| Fbxw5   | 11.6 | 11.0  | 9.8   | 11.1 | 11.3  | 12.1 | 10.7  | 11.6  | 12.1  | 11.9 | 10.7  | 9.5  |
| Fbxw7   | 6.9  | 6.0   | 5.7   | 6.5  | 6.7   | 5.4  | 6.1   | 4.4   | 5.0   | 6.6  | 6.6   | 5.8  |
| Fbxw8   | 24.3 | 23.2  | 19.0  | 22.0 | 20.9  | 21.5 | 21.5  | 21.6  | 23.5  | 22.5 | 21.5  | 21.3 |
| Fbxw9   | 10.2 | 8.8   | 7.6   | 9.1  | 7.0   | 10.3 | 8.6   | 8.4   | 9.2   | 9.7  | 7.3   | 6.3  |
| Fcer1g  | 8.0  | 0.1   | 0.3   | 87.5 | 127.5 | 0.1  | 18.1  | 1.5   | 1.8   | 9.7  | 2.2   | 6.0  |
| Fcer2a  | 0.0  | 0.0   | 0.0   | 0.1  | 0.1   | 0.0  | 0.1   | 0.0   | 0.1   | 0.0  | 0.0   | 0.1  |
| Fcf1    | 40.2 | 39.2  | 35.0  | 50.2 | 33.0  | 36.5 | 38.3  | 39.2  | 32.1  | 36.0 | 42.2  | 39.7 |
| Fcgbp   | 0.0  | 0.0   | 0.0   | 0.0  | 0.0   | 0.0  | 0.0   | 0.0   | 0.0   | 0.0  | 0.0   | 0.0  |
| Fcgr1   | 0.1  | 0.0   | 0.0   | 0.6  | 0.8   | 0.1  | 0.1   | 0.0   | 0.0   | 0.1  | 0.0   | 0.0  |
| Fcgr2b  | 1.0  | 0.0   | 0.1   | 4.8  | 9.7   | 0.0  | 1.1   | 0.2   | 0.2   | 0.2  | 0.2   | 0.4  |
| Fcgr3   | 3.2  | 0.2   | 0.5   | 23.9 | 27.4  | 0.0  | 1.5   | 1.1   | 0.4   | 1.1  | 1.1   | 1.4  |
| Fcgr4   | 0.2  | 0.1   | 0.1   | 1.3  | 1.6   | 0.1  | 0.2   | 0.2   | 0.1   | 0.8  | 0.2   | 0.7  |
| Fcgrt   | 68.5 | 67.4  | 71.2  | 71.4 | 57.6  | 91.6 | 68.4  | 74.7  | 74.5  | 71.3 | 59.9  | 75.7 |
| Fcho1   | 0.0  | 0.0   | 0.1   | 0.1  | 0.1   | 0.0  | 0.0   | 0.0   | 0.0   | 0.0  | 0.0   | 0.0  |
| Fcho2   | 2.4  | 3.4   | 3.7   | 2.9  | 3.3   | 3.3  | 3.7   | 3.8   | 3.2   | 3.7  | 4.1   | 5.2  |
| Fchsd1  | 2.5  | 3.0   | 2.6   | 2.9  | 2.2   | 3.3  | 2.7   | 2.4   | 2.7   | 2.9  | 2.4   | 2.6  |
| Fchsd2  | 9.3  | 10.8  | 12.7  | 8.9  | 8.4   | 9.4  | 9.7   | 11.9  | 9.7   | 8.8  | 9.0   | 10.0 |
| Fcna    | 0.5  | 0.2   | 0.1   | 0.8  | 0.5   | 0.5  | 0.2   | 0.0   | 0.1   | 0.1  | 0.1   | 0.2  |
| Fcrl1   | 0.0  | 0.0   | 0.0   | 0.3  | 0.8   | 0.0  | 0.0   | 0.0   | 0.0   | 0.1  | 0.0   | 0.0  |
| Fcr1s   | 1.6  | 0.0   | 0.0   | 15.4 | 28.8  | 0.0  | 2.1   | 0.0   | 0.1   | 1.2  | 0.5   | 0.9  |
| Fdft1   | 19.0 | 21.9  | 20.8  | 9.1  | 14.6  | 12.2 | 33.3  | 39.8  | 29.0  | 13.1 | 34.6  | 15.9 |
| Fdps    | 98.1 | 115.5 | 105.6 | 38.3 | 61.7  | 57.8 | 172.6 | 211.5 | 174.0 | 52.2 | 165.8 | 78.2 |
| Fdx1    | 15.3 | 12.0  | 12.5  | 13.1 | 11.6  | 12.7 | 13.4  | 11.8  | 11.7  | 14.1 | 13.7  | 13.5 |
| Fdx1l   | 25.5 | 20.3  | 16.6  | 29.0 | 21.8  | 31.3 | 22.7  | 19.7  | 19.8  | 21.5 | 21.4  | 20.3 |
| Fdxacb1 | 2.1  | 2.1   | 1.7   | 2.6  | 1.6   | 1.7  | 1.5   | 1.7   | 2.2   | 1.9  | 1.4   | 1.8  |
| Fdxr    | 8.3  | 12.2  | 13.6  | 6.8  | 8.9   | 7.4  | 7.5   | 17.1  | 15.0  | 12.9 | 8.6   | 13.3 |
| Fech    | 32.3 | 33.0  | 30.0  | 36.7 | 26.3  | 36.0 | 29.3  | 31.6  | 25.8  | 32.3 | 33.4  | 29.9 |
| Fem1a   | 4.9  | 4.9   | 4.2   | 4.8  | 5.1   | 5.1  | 4.3   | 4.5   | 4.8   | 4.8  | 4.6   | 4.3  |
| Fem1b   | 9.9  | 12.4  | 11.7  | 10.6 | 12.3  | 10.4 | 10.2  | 12.0  | 11.6  | 12.9 | 12.5  | 11.7 |
| Fem1c   | 4.2  | 4.1   | 4.2   | 3.6  | 4.8   | 3.7  | 3.9   | 4.1   | 4.5   | 5.2  | 4.5   | 4.5  |
| Fen1    | 5.4  | 6.9   | 6.7   | 5.4  | 9.7   | 3.5  | 8.5   | 5.8   | 6.9   | 5.1  | 5.3   | 4.6  |

Online Table 1



|          |       |       |      |       |       |       |       |       |       |      |       |       |
|----------|-------|-------|------|-------|-------|-------|-------|-------|-------|------|-------|-------|
| Fendrr   | 0.1   | 0.0   | 0.1  | 0.1   | 0.0   | 0.0   | 0.1   | 0.0   | 0.0   | 0.0  | 0.0   | 0.0   |
| Fer1l4   | 0.0   | 0.0   | 0.0  | 0.0   | 0.0   | 0.0   | 0.0   | 0.0   | 0.0   | 0.0  | 0.0   | 0.0   |
| Fermt1   | 0.0   | 0.0   | 0.0  | 0.1   | 0.1   | 0.0   | 0.0   | 0.0   | 0.0   | 0.0  | 0.0   | 0.0   |
| Fermt2   | 45.7  | 50.7  | 48.1 | 47.5  | 47.7  | 40.6  | 55.6  | 43.5  | 55.7  | 53.2 | 61.9  | 57.6  |
| Fermt3   | 1.5   | 0.2   | 0.2  | 9.0   | 16.4  | 0.1   | 2.4   | 0.2   | 0.4   | 0.9  | 0.5   | 0.9   |
| Fert2    | 23.0  | 26.5  | 32.1 | 24.5  | 22.5  | 27.6  | 29.7  | 31.6  | 26.5  | 22.2 | 28.6  | 32.2  |
| Fes      | 4.5   | 4.5   | 5.7  | 12.2  | 13.3  | 6.0   | 7.3   | 6.1   | 6.2   | 3.9  | 4.3   | 4.3   |
| Fetub    | 1.3   | 1.7   | 1.4  | 1.3   | 1.6   | 2.2   | 1.3   | 1.0   | 0.3   | 0.7  | 0.8   | 0.4   |
| Fez1     | 8.8   | 4.1   | 4.0  | 7.5   | 3.2   | 11.6  | 6.8   | 3.3   | 3.2   | 7.2  | 6.5   | 5.4   |
| Fez2     | 49.3  | 31.3  | 24.2 | 63.3  | 30.4  | 60.1  | 36.9  | 23.4  | 28.9  | 41.6 | 39.3  | 34.3  |
| Fgd1     | 1.5   | 2.1   | 2.2  | 1.2   | 1.7   | 1.8   | 2.0   | 2.6   | 2.5   | 2.0  | 1.8   | 1.6   |
| Fgd2     | 0.1   | 0.0   | 0.0  | 0.6   | 1.3   | 0.0   | 0.1   | 0.0   | 0.0   | 0.2  | 0.0   | 0.1   |
| Fgd3     | 58.9  | 41.5  | 17.9 | 79.7  | 48.7  | 83.9  | 31.9  | 15.6  | 18.8  | 15.9 | 26.9  | 14.2  |
| Fgd4     | 4.8   | 3.9   | 3.6  | 6.2   | 3.8   | 4.9   | 3.1   | 3.5   | 2.6   | 3.5  | 3.3   | 3.7   |
| Fgd5     | 0.1   | 0.1   | 0.1  | 0.0   | 0.0   | 0.0   | 0.1   | 0.2   | 0.2   | 0.0  | 0.0   | 0.0   |
| Fgd6     | 0.5   | 0.7   | 0.6  | 0.7   | 1.2   | 0.5   | 0.9   | 0.7   | 0.7   | 1.2  | 1.1   | 0.9   |
| Fgf1     | 0.2   | 0.2   | 0.1  | 0.7   | 0.3   | 0.3   | 0.3   | 0.2   | 0.1   | 0.4  | 0.3   | 0.2   |
| Fgf10    | 0.0   | 0.0   | 0.0  | 0.0   | 0.0   | 0.1   | 0.0   | 0.0   | 0.0   | 0.1  | 0.0   | 0.0   |
| Fgf11    | 0.3   | 0.6   | 1.4  | 0.6   | 0.6   | 0.4   | 0.6   | 0.9   | 1.1   | 0.8  | 0.6   | 1.0   |
| Fgf12    | 0.0   | 0.0   | 0.0  | 0.0   | 0.0   | 0.0   | 0.0   | 0.0   | 0.0   | 0.0  | 0.0   | 0.0   |
| Fgf13    | 0.2   | 0.1   | 0.1  | 0.1   | 0.4   | 0.2   | 0.1   | 0.0   | 0.1   | 0.1  | 0.1   | 0.2   |
| Fgf14    | 0.3   | 0.1   | 0.2  | 0.5   | 0.1   | 0.3   | 0.1   | 0.2   | 0.1   | 0.1  | 0.2   | 0.2   |
| Fgf16    | 0.1   | 0.0   | 0.0  | 0.0   | 0.0   | 0.0   | 0.0   | 0.1   | 0.0   | 0.0  | 0.0   | 0.0   |
| Fgf17    | 0.0   | 0.0   | 0.1  | 0.0   | 0.0   | 0.0   | 0.0   | 0.0   | 0.0   | 0.0  | 0.0   | 0.1   |
| Fgf18    | 6.0   | 2.6   | 1.8  | 2.4   | 0.8   | 3.2   | 2.0   | 3.2   | 3.6   | 4.5  | 3.7   | 3.6   |
| Fgf2     | 16.5  | 18.7  | 20.5 | 11.1  | 13.1  | 10.4  | 17.7  | 10.4  | 15.9  | 35.5 | 21.0  | 25.7  |
| Fgf20    | 0.0   | 0.1   | 0.0  | 0.0   | 0.0   | 0.0   | 0.0   | 0.0   | 0.0   | 0.0  | 0.0   | 0.0   |
| Fgf21    | 0.2   | 0.2   | 0.1  | 0.6   | 0.0   | 0.6   | 0.0   | 0.1   | 0.2   | 0.4  | 0.1   | 0.4   |
| Fgf23    | 0.0   | 0.1   | 0.0  | 0.0   | 0.0   | 0.0   | 0.0   | 0.0   | 0.0   | 0.1  | 0.0   | 0.0   |
| Fgf5     | 0.0   | 0.0   | 0.0  | 0.0   | 0.0   | 0.0   | 0.0   | 0.0   | 0.0   | 0.0  | 0.0   | 0.0   |
| Fgf7     | 10.6  | 15.6  | 25.2 | 14.6  | 11.0  | 18.1  | 14.4  | 13.0  | 11.6  | 17.0 | 18.2  | 23.3  |
| Fgf9     | 2.2   | 4.4   | 5.6  | 2.7   | 2.7   | 1.3   | 2.6   | 3.6   | 3.9   | 1.7  | 2.0   | 2.5   |
| Fgfbp3   | 2.9   | 2.8   | 3.3  | 3.1   | 3.0   | 4.8   | 2.8   | 3.1   | 3.0   | 4.5  | 3.9   | 3.4   |
| Fgfr1    | 25.1  | 26.5  | 26.1 | 27.9  | 26.9  | 31.5  | 31.5  | 32.4  | 25.9  | 23.4 | 21.7  | 24.5  |
| Fgfr1op  | 5.4   | 5.2   | 5.7  | 4.2   | 4.5   | 4.8   | 4.6   | 4.1   | 4.1   | 4.5  | 4.4   | 4.6   |
| Fgfr1op2 | 22.4  | 23.3  | 24.5 | 28.3  | 22.0  | 23.3  | 23.3  | 24.3  | 22.9  | 21.0 | 25.9  | 24.6  |
| Fgfr2    | 7.1   | 7.4   | 9.6  | 3.3   | 3.8   | 3.6   | 6.2   | 7.9   | 7.2   | 13.2 | 10.4  | 13.7  |
| Fgfr3    | 0.8   | 1.3   | 1.5  | 0.2   | 0.6   | 0.2   | 0.6   | 1.0   | 1.0   | 1.4  | 1.2   | 1.0   |
| Fgfr4    | 0.0   | 0.0   | 0.0  | 0.0   | 0.0   | 0.0   | 0.0   | 0.0   | 0.0   | 0.0  | 0.0   | 0.0   |
| Fgfrl1   | 24.1  | 23.2  | 26.3 | 20.7  | 19.6  | 20.9  | 29.1  | 30.4  | 34.6  | 22.6 | 28.9  | 26.2  |
| Fggy     | 17.0  | 14.5  | 11.9 | 16.5  | 11.0  | 16.1  | 10.7  | 9.6   | 10.2  | 10.9 | 11.0  | 11.5  |
| Fgl1     | 0.3   | 0.3   | 0.8  | 0.4   | 0.2   | 0.3   | 0.5   | 0.4   | 0.2   | 0.3  | 0.4   | 0.8   |
| Fgl2     | 0.2   | 0.4   | 1.6  | 0.1   | 0.3   | 0.0   | 0.3   | 0.8   | 0.4   | 0.2  | 0.4   | 0.7   |
| Fgr      | 0.1   | 0.0   | 0.0  | 0.3   | 1.5   | 0.0   | 0.1   | 0.0   | 0.0   | 0.0  | 0.0   | 0.0   |
| Fh1      | 32.3  | 30.2  | 25.6 | 27.4  | 26.6  | 25.1  | 25.1  | 24.9  | 24.5  | 27.2 | 28.4  | 26.7  |
| Fhad1    | 0.0   | 0.1   | 0.0  | 0.0   | 0.1   | 0.0   | 0.1   | 0.0   | 0.0   | 0.0  | 0.1   | 0.1   |
| Fhdc1    | 8.8   | 7.3   | 6.6  | 8.0   | 5.8   | 10.4  | 7.0   | 5.8   | 6.0   | 11.9 | 10.1  | 8.0   |
| Fhit     | 1.8   | 1.6   | 1.4  | 0.7   | 0.9   | 1.3   | 0.4   | 1.3   | 0.6   | 1.2  | 0.7   | 1.1   |
| Fhl1     | 92.3  | 84.9  | 55.8 | 84.2  | 53.9  | 82.1  | 58.5  | 35.3  | 48.2  | 61.7 | 86.4  | 59.5  |
| Fhl2     | 130.1 | 133.6 | 86.8 | 210.7 | 129.9 | 193.0 | 157.2 | 103.2 | 170.1 | 81.1 | 112.0 | 114.2 |
| Fhl3     | 2.6   | 3.4   | 2.1  | 4.9   | 8.5   | 3.1   | 5.7   | 3.4   | 4.1   | 4.3  | 5.1   | 2.7   |
| Fhl4     | 0.6   | 1.0   | 1.2  | 0.4   | 0.9   | 0.6   | 0.6   | 0.6   | 0.7   | 0.8  | 0.7   | 0.5   |
| Fhod1    | 1.7   | 2.0   | 1.4  | 1.5   | 2.0   | 1.7   | 2.1   | 1.7   | 2.4   | 2.4  | 1.4   | 1.5   |
| Fhod3    | 0.2   | 0.1   | 0.2  | 0.1   | 0.1   | 0.1   | 0.1   | 0.1   | 0.1   | 0.2  | 0.2   | 0.2   |
| Fibcd1   | 0.1   | 0.0   | 0.0  | 0.2   | 0.0   | 0.1   | 0.0   | 0.0   | 0.0   | 0.0  | 0.1   | 0.0   |
| Fibin    | 16.0  | 12.7  | 20.1 | 9.8   | 8.8   | 4.8   | 9.5   | 16.9  | 18.4  | 6.9  | 9.4   | 14.9  |
| Fibp     | 16.5  | 16.6  | 17.4 | 16.5  | 15.0  | 16.1  | 17.3  | 18.9  | 19.3  | 15.9 | 14.2  | 16.5  |

Online Table 1

|         |       |       |       |       |       |       |       |       |       |       |       |       |
|---------|-------|-------|-------|-------|-------|-------|-------|-------|-------|-------|-------|-------|
| Ficd    | 7.3   | 6.9   | 6.5   | 7.6   | 5.8   | 8.2   | 7.2   | 5.3   | 7.0   | 5.7   | 7.0   | 6.4   |
| Fig4    | 10.8  | 10.8  | 9.6   | 10.4  | 9.2   | 11.1  | 10.1  | 10.9  | 9.5   | 10.1  | 11.7  | 12.7  |
| Figf    | 27.5  | 47.1  | 106.5 | 14.5  | 31.1  | 13.1  | 56.4  | 121.4 | 83.0  | 44.8  | 56.4  | 70.6  |
| Figl    | 0.1   | 0.1   | 0.1   | 0.0   | 0.0   | 0.0   | 0.1   | 0.1   | 0.1   | 0.1   | 0.1   | 0.1   |
| Figl1   | 1.6   | 3.0   | 4.1   | 0.7   | 3.7   | 0.7   | 4.1   | 2.0   | 3.0   | 1.8   | 2.7   | 2.6   |
| Figl2   | 0.9   | 1.1   | 1.1   | 0.9   | 0.7   | 0.8   | 1.0   | 1.0   | 0.8   | 1.0   | 0.8   | 0.7   |
| Filip1  | 0.8   | 1.0   | 1.0   | 0.8   | 0.8   | 0.7   | 0.6   | 0.5   | 0.3   | 0.4   | 0.3   | 0.3   |
| Filip1l | 42.2  | 44.4  | 47.4  | 58.1  | 45.2  | 38.9  | 48.5  | 28.6  | 38.4  | 36.4  | 50.6  | 48.3  |
| Fip1l1  | 15.0  | 15.3  | 18.4  | 19.2  | 13.2  | 18.2  | 18.2  | 14.8  | 11.2  | 14.9  | 17.4  | 17.2  |
| Fis1    | 101.9 | 86.3  | 71.7  | 96.9  | 84.0  | 83.8  | 91.4  | 94.6  | 98.6  | 104.8 | 94.0  | 90.6  |
| Fitm2   | 6.5   | 6.2   | 5.4   | 5.4   | 5.3   | 5.4   | 6.5   | 5.4   | 5.9   | 5.5   | 5.9   | 4.6   |
| Fiz1    | 5.1   | 4.7   | 4.3   | 5.1   | 4.3   | 4.9   | 4.5   | 4.7   | 4.9   | 4.8   | 4.1   | 4.2   |
| Fjx1    | 1.0   | 0.7   | 0.6   | 1.1   | 0.9   | 0.7   | 1.0   | 1.1   | 1.2   | 1.7   | 1.1   | 1.0   |
| Fkbp10  | 88.9  | 71.3  | 67.5  | 78.5  | 72.6  | 70.4  | 85.2  | 81.7  | 82.3  | 75.9  | 83.1  | 72.2  |
| Fkbp11  | 35.7  | 23.3  | 21.8  | 37.7  | 24.9  | 40.4  | 33.6  | 20.7  | 23.0  | 31.2  | 28.3  | 26.7  |
| Fkbp14  | 33.7  | 30.6  | 30.0  | 36.7  | 31.8  | 30.3  | 40.1  | 31.2  | 35.8  | 36.2  | 37.4  | 39.3  |
| Fkbp15  | 12.6  | 13.1  | 14.2  | 13.9  | 14.5  | 12.6  | 14.3  | 14.6  | 13.7  | 12.6  | 13.8  | 15.1  |
| Fkbp1a  | 34.6  | 27.2  | 27.7  | 41.5  | 31.5  | 35.1  | 36.5  | 33.7  | 30.9  | 40.2  | 38.3  | 35.9  |
| Fkbp1b  | 1.1   | 0.7   | 1.9   | 0.9   | 1.8   | 0.7   | 1.1   | 1.8   | 1.0   | 0.9   | 1.0   | 1.4   |
| Fkbp2   | 18.9  | 19.4  | 20.6  | 35.0  | 17.1  | 24.2  | 27.1  | 28.4  | 25.7  | 21.5  | 26.4  | 29.9  |
| Fkbp3   | 99.9  | 84.2  | 84.4  | 99.8  | 71.1  | 114.7 | 76.5  | 72.7  | 68.0  | 81.2  | 91.7  | 89.2  |
| Fkbp4   | 30.2  | 30.6  | 29.8  | 32.4  | 28.9  | 32.8  | 30.5  | 27.3  | 29.0  | 35.4  | 33.3  | 28.0  |
| Fkbp5   | 1.8   | 2.6   | 3.9   | 1.9   | 4.1   | 1.8   | 3.6   | 4.2   | 3.0   | 3.1   | 3.6   | 3.3   |
| Fkbp6   | 0.0   | 0.1   | 0.0   | 0.0   | 0.0   | 0.2   | 0.0   | 0.1   | 0.0   | 0.0   | 0.1   | 0.0   |
| Fkbp7   | 63.9  | 58.2  | 66.5  | 77.5  | 54.1  | 64.2  | 59.4  | 67.4  | 59.8  | 72.4  | 70.7  | 77.1  |
| Fkbp8   | 71.0  | 67.0  | 57.3  | 72.4  | 65.0  | 68.3  | 68.6  | 70.3  | 71.9  | 76.8  | 69.5  | 61.4  |
| Fkbp9   | 176.3 | 155.9 | 159.1 | 148.8 | 140.9 | 156.3 | 140.9 | 137.9 | 133.1 | 153.2 | 143.8 | 155.0 |
| Fkbp1   | 6.0   | 5.2   | 6.0   | 6.4   | 5.6   | 5.7   | 5.7   | 5.0   | 4.0   | 5.6   | 6.1   | 6.1   |
| Fkrp    | 9.5   | 8.6   | 8.1   | 9.0   | 9.6   | 8.5   | 11.7  | 10.4  | 10.9  | 9.2   | 8.9   | 9.1   |
| Fktn    | 8.5   | 8.3   | 7.5   | 7.5   | 7.4   | 7.4   | 8.0   | 6.5   | 7.9   | 6.3   | 7.8   | 8.2   |
| Flad1   | 6.5   | 6.0   | 4.9   | 6.5   | 5.5   | 6.2   | 5.3   | 5.3   | 5.8   | 5.3   | 4.6   | 5.2   |
| Flcn    | 8.8   | 7.9   | 7.7   | 8.8   | 8.4   | 10.3  | 6.2   | 7.9   | 8.5   | 10.2  | 7.0   | 8.1   |
| Fli1    | 3.6   | 3.8   | 5.2   | 6.3   | 7.6   | 3.6   | 5.0   | 5.0   | 3.9   | 3.6   | 4.8   | 5.1   |
| Flii    | 52.0  | 46.0  | 45.6  | 61.3  | 51.9  | 51.7  | 55.0  | 49.1  | 48.5  | 44.2  | 51.7  | 51.7  |
| Flna    | 211.5 | 173.8 | 146.2 | 221.8 | 242.9 | 190.7 | 270.1 | 215.5 | 258.5 | 234.4 | 283.9 | 215.2 |
| Flnb    | 89.9  | 64.8  | 51.5  | 87.3  | 75.8  | 84.0  | 96.0  | 64.6  | 65.1  | 72.4  | 86.0  | 63.6  |
| Flnc    | 27.5  | 25.5  | 20.1  | 21.4  | 19.2  | 23.8  | 27.3  | 23.2  | 25.4  | 38.9  | 28.0  | 21.3  |
| Flot1   | 60.6  | 77.3  | 95.0  | 48.8  | 58.0  | 64.4  | 84.4  | 100.3 | 95.9  | 65.7  | 82.5  | 77.0  |
| Flot2   | 26.5  | 23.4  | 24.4  | 32.6  | 23.4  | 32.4  | 27.6  | 23.4  | 23.3  | 21.0  | 25.2  | 22.7  |
| Flrt1   | 0.0   | 0.0   | 0.1   | 0.0   | 0.0   | 0.0   | 0.0   | 0.1   | 0.0   | 0.1   | 0.0   | 0.0   |
| Flrt2   | 3.8   | 2.5   | 2.9   | 2.3   | 2.8   | 2.5   | 4.9   | 9.4   | 6.0   | 14.0  | 10.9  | 7.2   |
| Flrt3   | 1.3   | 0.5   | 0.6   | 1.7   | 1.0   | 0.7   | 0.7   | 0.4   | 0.3   | 1.1   | 1.3   | 0.5   |
| Flt1    | 0.2   | 0.3   | 0.2   | 0.3   | 0.2   | 0.2   | 0.2   | 0.2   | 0.2   | 1.9   | 2.0   | 1.0   |
| Flt3    | 0.0   | 0.0   | 0.0   | 0.0   | 0.0   | 0.0   | 0.0   | 0.0   | 0.0   | 0.0   | 0.0   | 0.0   |
| Flt3l   | 1.7   | 2.4   | 3.2   | 2.3   | 1.3   | 2.1   | 1.6   | 1.8   | 1.7   | 1.6   | 1.9   | 2.1   |
| Flt4    | 0.7   | 0.2   | 0.3   | 1.0   | 0.6   | 0.8   | 0.8   | 0.5   | 0.5   | 1.7   | 0.8   | 0.9   |
| Flywch1 | 16.6  | 17.0  | 15.0  | 20.7  | 14.7  | 20.7  | 15.4  | 14.2  | 14.3  | 14.7  | 15.2  | 13.9  |
| Flywch2 | 0.4   | 0.5   | 0.3   | 0.1   | 0.3   | 0.1   | 0.3   | 0.3   | 0.2   | 1.0   | 0.3   | 0.3   |
| Fmn1    | 7.1   | 6.4   | 5.0   | 8.5   | 6.1   | 7.8   | 7.6   | 4.9   | 6.5   | 5.4   | 7.2   | 6.5   |
| Fmn2    | 0.0   | 0.0   | 0.0   | 0.0   | 0.0   | 0.0   | 0.1   | 0.0   | 0.0   | 0.0   | 0.0   | 0.0   |
| Fmnl1   | 0.6   | 0.5   | 0.5   | 1.8   | 4.3   | 0.1   | 0.9   | 0.7   | 0.3   | 0.5   | 0.3   | 0.2   |
| Fmnl2   | 0.8   | 1.2   | 1.7   | 1.1   | 2.0   | 0.8   | 1.1   | 1.7   | 1.2   | 1.9   | 1.2   | 1.6   |
| Fmnl3   | 4.9   | 6.5   | 6.1   | 6.1   | 9.2   | 5.0   | 9.5   | 8.6   | 9.7   | 6.7   | 5.6   | 7.7   |
| Fmo1    | 1.3   | 2.8   | 12.6  | 1.1   | 4.2   | 0.9   | 3.1   | 15.0  | 4.8   | 1.5   | 1.5   | 7.3   |
| Fmo2    | 3.3   | 8.8   | 16.0  | 1.5   | 4.2   | 1.0   | 2.9   | 6.5   | 4.5   | 3.9   | 3.0   | 10.9  |
| Fmo3    | 0.0   | 0.0   | 0.1   | 0.1   | 0.0   | 0.0   | 0.1   | 0.1   | 0.2   | 0.1   | 0.1   | 0.3   |
| Fmo4    | 0.1   | 0.1   | 0.3   | 0.0   | 0.1   | 0.2   | 0.1   | 0.4   | 0.1   | 0.1   | 0.1   | 0.1   |

Online Table 1

|         |       |       |       |       |       |       |       |       |       |       |       |       |
|---------|-------|-------|-------|-------|-------|-------|-------|-------|-------|-------|-------|-------|
| Fmo5    | 1.6   | 1.9   | 2.0   | 1.8   | 1.1   | 2.4   | 1.6   | 1.6   | 1.4   | 1.0   | 1.2   | 1.4   |
| Fmod    | 37.1  | 35.5  | 61.6  | 12.4  | 22.1  | 18.9  | 50.1  | 35.5  | 34.2  | 30.8  | 41.5  | 53.4  |
| Fmr1    | 9.7   | 14.3  | 20.3  | 10.2  | 12.5  | 10.1  | 15.5  | 16.5  | 18.5  | 23.6  | 21.3  | 26.9  |
| Fmr1nb  | 2.8   | 1.7   | 2.0   | 1.6   | 1.7   | 1.4   | 2.7   | 0.7   | 1.1   | 1.3   | 0.6   | 1.0   |
| Fn1     | 475.3 | 550.1 | 692.1 | 453.5 | 812.9 | 555.7 | 790.1 | 819.5 | 799.9 | 858.6 | 686.5 | 741.0 |
| Fn3k    | 0.0   | 0.1   | 0.1   | 0.2   | 0.1   | 0.0   | 0.0   | 0.0   | 0.0   | 0.0   | 0.1   | 0.0   |
| Fn3krp  | 7.5   | 8.7   | 7.8   | 9.6   | 5.7   | 8.8   | 7.1   | 7.2   | 7.4   | 6.6   | 7.0   | 6.5   |
| Fnbp1   | 11.7  | 14.0  | 16.1  | 16.3  | 18.3  | 15.6  | 14.1  | 11.2  | 10.4  | 11.3  | 10.5  | 12.5  |
| Fnbp1l  | 0.4   | 0.6   | 1.1   | 0.8   | 1.8   | 0.5   | 1.4   | 1.6   | 1.6   | 2.0   | 1.5   | 1.6   |
| Fnbp4   | 4.2   | 4.4   | 4.7   | 4.4   | 4.4   | 4.1   | 4.9   | 4.7   | 4.6   | 5.3   | 4.6   | 4.8   |
| Fndc1   | 4.3   | 12.4  | 26.1  | 4.9   | 20.6  | 4.0   | 23.0  | 33.2  | 26.7  | 10.4  | 10.8  | 12.6  |
| Fndc3a  | 19.5  | 26.5  | 27.6  | 22.8  | 20.1  | 26.8  | 22.3  | 21.1  | 21.2  | 18.4  | 20.1  | 26.1  |
| Fndc3b  | 38.1  | 45.7  | 46.6  | 40.9  | 46.2  | 38.1  | 52.3  | 50.5  | 55.1  | 40.5  | 50.5  | 50.2  |
| Fndc4   | 0.6   | 0.7   | 1.4   | 0.4   | 0.4   | 1.0   | 1.6   | 1.2   | 1.2   | 1.2   | 1.2   | 1.1   |
| Fndc5   | 0.3   | 0.2   | 0.3   | 0.2   | 0.2   | 0.2   | 0.3   | 0.5   | 0.4   | 0.5   | 0.3   | 0.3   |
| Fndc7   | 0.0   | 0.0   | 0.0   | 0.0   | 0.0   | 0.0   | 0.0   | 0.0   | 0.0   | 0.1   | 0.0   | 0.1   |
| Fndc8   | 0.1   | 0.0   | 0.0   | 0.0   | 0.1   | 0.1   | 0.1   | 0.1   | 0.0   | 0.0   | 0.1   | 0.1   |
| Fndc9   | 0.0   | 0.0   | 0.0   | 0.1   | 0.2   | 0.0   | 0.1   | 0.0   | 0.0   | 0.0   | 0.1   | 0.0   |
| Fnip1   | 10.6  | 11.9  | 11.8  | 11.1  | 10.4  | 12.5  | 9.5   | 9.4   | 9.4   | 10.7  | 11.1  | 13.2  |
| Fnip2   | 4.6   | 4.5   | 4.1   | 7.4   | 7.6   | 5.3   | 4.4   | 3.0   | 3.4   | 3.2   | 3.4   | 3.9   |
| Fnta    | 50.0  | 43.9  | 45.0  | 40.4  | 39.4  | 40.8  | 42.4  | 41.9  | 44.1  | 51.6  | 47.7  | 51.2  |
| Fntb    | 3.7   | 3.3   | 3.0   | 3.5   | 2.8   | 3.4   | 3.6   | 3.1   | 3.3   | 2.8   | 3.1   | 2.6   |
| Focad   | 6.9   | 6.0   | 5.3   | 5.6   | 5.1   | 5.6   | 4.4   | 4.9   | 4.7   | 5.3   | 5.2   | 5.2   |
| Folh1   | 0.0   | 0.0   | 0.0   | 0.0   | 0.0   | 0.1   | 0.0   | 0.0   | 0.0   | 0.1   | 0.1   | 0.0   |
| Folr1   | 3.7   | 3.4   | 2.2   | 4.4   | 2.7   | 4.4   | 3.0   | 1.5   | 2.8   | 9.9   | 5.5   | 4.6   |
| Folr2   | 1.2   | 0.4   | 0.1   | 5.5   | 3.9   | 1.2   | 0.5   | 0.7   | 0.4   | 0.9   | 1.0   | 0.5   |
| Fopnl   | 26.4  | 25.1  | 21.4  | 26.0  | 23.7  | 25.8  | 24.8  | 24.1  | 26.5  | 27.6  | 28.0  | 24.1  |
| Fos     | 4.9   | 6.0   | 4.0   | 2.7   | 4.9   | 1.6   | 3.3   | 3.4   | 3.7   | 21.4  | 5.8   | 4.1   |
| Fosb    | 0.2   | 0.2   | 0.2   | 0.2   | 0.2   | 0.2   | 0.3   | 0.1   | 0.1   | 0.7   | 0.1   | 0.2   |
| Fosl1   | 0.4   | 0.3   | 0.2   | 0.5   | 0.9   | 0.5   | 0.8   | 0.2   | 0.2   | 0.6   | 0.4   | 0.3   |
| Fosl2   | 25.4  | 33.4  | 33.3  | 22.1  | 23.4  | 27.1  | 25.3  | 28.0  | 26.9  | 25.0  | 23.7  | 25.2  |
| Foxa2   | 0.0   | 0.0   | 0.0   | 0.0   | 0.0   | 0.0   | 0.0   | 0.0   | 0.0   | 0.5   | 0.2   | 0.1   |
| Foxc1   | 2.2   | 2.6   | 3.7   | 2.2   | 1.9   | 1.7   | 2.4   | 2.1   | 2.6   | 2.9   | 2.6   | 2.8   |
| Foxc2   | 2.0   | 1.8   | 1.6   | 1.7   | 2.1   | 1.4   | 3.1   | 1.8   | 1.9   | 2.9   | 2.8   | 2.8   |
| Foxd1   | 0.1   | 0.1   | 0.1   | 0.1   | 0.1   | 0.1   | 0.0   | 0.1   | 0.1   | 0.1   | 0.0   | 0.1   |
| Foxd2   | 0.3   | 0.2   | 0.2   | 0.1   | 0.1   | 0.1   | 0.2   | 0.1   | 0.3   | 0.4   | 0.1   | 0.2   |
| Foxe1   | 0.0   | 0.0   | 0.4   | 0.0   | 0.3   | 0.2   | 0.2   | 0.4   | 0.0   | 0.0   | 0.0   | 0.4   |
| Foxf1   | 2.0   | 1.2   | 1.0   | 2.8   | 2.5   | 2.1   | 1.8   | 1.3   | 1.8   | 1.5   | 1.9   | 1.7   |
| Foxf2   | 1.3   | 1.4   | 0.8   | 2.5   | 1.8   | 1.4   | 1.7   | 1.2   | 1.2   | 0.9   | 0.7   | 0.5   |
| Foxg1   | 0.1   | 0.2   | 0.6   | 0.8   | 0.6   | 0.7   | 0.5   | 0.7   | 0.4   | 0.4   | 0.4   | 0.3   |
| Foxj1   | 0.0   | 0.0   | 0.1   | 0.0   | 0.0   | 0.0   | 0.0   | 0.0   | 0.0   | 0.0   | 0.1   | 0.0   |
| Foxj2   | 2.3   | 3.4   | 3.8   | 3.7   | 3.0   | 3.0   | 3.2   | 3.5   | 3.3   | 2.5   | 2.7   | 2.6   |
| Foxj3   | 6.6   | 6.6   | 7.1   | 7.2   | 5.9   | 7.0   | 6.8   | 6.6   | 6.0   | 5.7   | 7.0   | 6.6   |
| Foxk1   | 1.3   | 1.7   | 1.6   | 1.6   | 1.7   | 1.3   | 2.0   | 1.6   | 1.6   | 1.6   | 1.9   | 1.5   |
| Foxk2   | 12.2  | 14.8  | 13.7  | 10.1  | 12.2  | 12.9  | 15.7  | 15.0  | 13.9  | 12.0  | 14.9  | 11.7  |
| Foxl1   | 0.1   | 0.1   | 0.0   | 0.1   | 0.0   | 0.2   | 0.1   | 0.1   | 0.1   | 0.1   | 0.0   | 0.1   |
| Foxl2   | 0.1   | 0.0   | 0.1   | 0.1   | 0.0   | 0.2   | 0.0   | 0.0   | 0.0   | 0.1   | 0.0   | 0.0   |
| Foxl2os | 0.2   | 0.1   | 0.0   | 0.2   | 0.1   | 0.1   | 0.1   | 0.0   | 0.0   | 0.0   | 0.0   | 0.0   |
| Foxm1   | 0.8   | 1.4   | 2.1   | 0.4   | 1.9   | 0.5   | 3.2   | 1.0   | 2.1   | 0.9   | 1.4   | 1.2   |
| Foxn1   | 0.0   | 0.0   | 0.0   | 0.0   | 0.0   | 0.0   | 0.0   | 0.0   | 0.0   | 0.0   | 0.0   | 0.0   |
| Foxn2   | 4.7   | 5.1   | 4.8   | 5.5   | 5.7   | 3.6   | 4.3   | 5.0   | 4.5   | 4.6   | 5.8   | 5.1   |
| Foxn3   | 13.3  | 14.2  | 16.4  | 11.7  | 11.1  | 11.8  | 12.9  | 18.4  | 14.0  | 11.4  | 14.1  | 13.5  |
| Foxo1   | 1.8   | 1.9   | 2.4   | 1.6   | 1.5   | 1.6   | 1.5   | 1.8   | 1.3   | 1.2   | 1.1   | 1.6   |
| Foxo3   | 9.5   | 11.4  | 11.7  | 8.9   | 9.9   | 10.1  | 10.6  | 10.6  | 9.7   | 11.3  | 9.7   | 9.3   |
| Foxo4   | 6.2   | 6.1   | 5.2   | 5.5   | 5.2   | 7.2   | 4.3   | 5.2   | 5.3   | 6.5   | 5.7   | 5.1   |
| Foxo6   | 0.2   | 0.1   | 0.0   | 0.1   | 0.0   | 0.1   | 0.0   | 0.2   | 0.1   | 0.6   | 0.3   | 0.1   |
| Foxp1   | 5.6   | 6.7   | 7.3   | 6.4   | 7.1   | 5.6   | 8.8   | 8.5   | 8.2   | 8.8   | 9.3   | 9.2   |

Online Table 1

|          |        |        |        |        |        |         |        |        |        |        |        |        |
|----------|--------|--------|--------|--------|--------|---------|--------|--------|--------|--------|--------|--------|
| Foxp2    | 3.0    | 4.5    | 5.6    | 3.2    | 2.8    | 2.4     | 3.3    | 5.4    | 4.6    | 2.2    | 2.8    | 4.4    |
| Foxp3    | 0.1    | 0.1    | 0.0    | 0.0    | 0.0    | 0.0     | 0.0    | 0.0    | 0.0    | 0.0    | 0.0    | 0.1    |
| Foxp4    | 2.0    | 2.2    | 2.2    | 2.1    | 2.5    | 1.8     | 2.9    | 3.0    | 2.7    | 2.5    | 2.3    | 2.1    |
| Foxq1    | 0.0    | 0.0    | 0.1    | 0.2    | 0.1    | 0.0     | 0.1    | 0.0    | 0.0    | 0.1    | 0.0    | 0.0    |
| Foxred1  | 8.3    | 8.6    | 7.6    | 6.8    | 6.1    | 7.8     | 7.5    | 7.3    | 7.3    | 5.5    | 6.9    | 6.0    |
| Foxred2  | 0.4    | 0.4    | 0.4    | 0.6    | 0.6    | 0.8     | 0.5    | 0.4    | 0.5    | 0.8    | 0.4    | 0.5    |
| Foxs1    | 3.3    | 3.6    | 5.4    | 2.9    | 7.1    | 2.6     | 7.8    | 5.2    | 8.1    | 12.9   | 6.9    | 7.7    |
| Fpgs     | 6.0    | 5.7    | 4.9    | 6.7    | 6.5    | 5.9     | 8.9    | 8.8    | 8.8    | 7.9    | 6.9    | 6.8    |
| Fpgt     | 7.1    | 7.5    | 7.6    | 8.0    | 8.1    | 7.8     | 7.7    | 6.4    | 7.9    | 8.0    | 8.0    | 8.0    |
| Fpr1     | 1.3    | 0.0    | 0.0    | 4.4    | 13.6   | 0.0     | 2.6    | 0.4    | 0.5    | 0.8    | 0.4    | 1.2    |
| Fpr2     | 0.3    | 0.0    | 0.1    | 1.1    | 4.1    | 0.0     | 0.7    | 0.1    | 0.3    | 0.1    | 0.0    | 0.8    |
| Fra10ac1 | 8.4    | 7.8    | 9.0    | 9.1    | 6.5    | 9.5     | 7.6    | 6.4    | 6.6    | 7.5    | 8.4    | 8.5    |
| Fras1    | 0.3    | 0.2    | 0.2    | 0.1    | 0.1    | 0.2     | 0.1    | 0.2    | 0.2    | 1.0    | 0.7    | 0.4    |
| Frat1    | 0.1    | 0.2    | 0.1    | 0.0    | 0.0    | 0.0     | 0.1    | 0.1    | 0.2    | 0.1    | 0.1    | 0.1    |
| Frat2    | 0.3    | 0.3    | 0.4    | 0.1    | 0.3    | 0.1     | 0.2    | 0.4    | 0.4    | 0.6    | 0.3    | 0.2    |
| Frem1    | 0.4    | 0.7    | 0.7    | 0.5    | 0.8    | 0.8     | 0.5    | 0.4    | 0.3    | 0.5    | 0.5    | 0.3    |
| Frem2    | 0.0    | 0.0    | 0.0    | 0.0    | 0.0    | 0.0     | 0.0    | 0.0    | 0.0    | 0.0    | 0.0    | 0.0    |
| Frem3    | 0.0    | 0.0    | 0.0    | 0.0    | 0.0    | 0.0     | 0.0    | 0.0    | 0.0    | 0.0    | 0.0    | 0.0    |
| Frg1     | 26.4   | 27.6   | 28.4   | 30.4   | 25.5   | 28.8    | 29.3   | 28.5   | 23.8   | 25.6   | 33.6   | 33.5   |
| Frk      | 4.1    | 3.6    | 3.6    | 5.3    | 4.0    | 4.4     | 4.1    | 3.2    | 3.8    | 6.2    | 5.3    | 5.0    |
| Frmd3    | 1.7    | 1.8    | 0.9    | 1.4    | 0.7    | 0.7     | 0.9    | 0.9    | 0.5    | 0.7    | 0.8    | 1.2    |
| Frmd4a   | 10.6   | 13.3   | 11.8   | 12.6   | 11.7   | 11.6    | 17.3   | 11.1   | 14.0   | 11.0   | 12.9   | 13.2   |
| Frmd4b   | 2.4    | 1.9    | 1.6    | 2.7    | 2.5    | 1.5     | 0.8    | 1.6    | 0.8    | 7.1    | 3.4    | 2.1    |
| Frmd5    | 0.1    | 0.0    | 0.1    | 0.0    | 0.0    | 0.1     | 0.0    | 0.0    | 0.1    | 0.1    | 0.1    | 0.0    |
| Frmd6    | 19.6   | 23.8   | 22.6   | 21.8   | 24.8   | 26.6    | 29.6   | 20.5   | 26.0   | 28.9   | 26.2   | 24.6   |
| Frmd7    | 0.0    | 0.0    | 0.0    | 0.0    | 0.0    | 0.0     | 0.0    | 0.1    | 0.0    | 0.6    | 0.5    | 0.2    |
| Frmd8    | 12.5   | 13.7   | 10.6   | 10.8   | 13.9   | 11.6    | 12.2   | 10.8   | 13.2   | 14.5   | 12.3   | 9.8    |
| Frmpd1   | 1.1    | 0.2    | 0.1    | 0.7    | 0.2    | 0.4     | 0.5    | 0.2    | 0.3    | 0.7    | 0.8    | 0.6    |
| Frmpd4   | 0.0    | 0.0    | 0.0    | 0.0    | 0.0    | 0.0     | 0.0    | 0.0    | 0.0    | 0.0    | 0.0    | 0.0    |
| Frrs1    | 9.3    | 6.7    | 6.7    | 9.1    | 10.3   | 6.6     | 6.7    | 6.2    | 6.8    | 7.8    | 8.1    | 7.9    |
| Frrs1l   | 0.1    | 0.0    | 0.1    | 0.0    | 0.1    | 0.2     | 0.0    | 0.0    | 0.0    | 0.0    | 0.1    | 0.0    |
| Frs2     | 4.5    | 6.1    | 7.2    | 4.3    | 5.6    | 4.6     | 6.6    | 6.1    | 6.8    | 6.7    | 7.0    | 7.7    |
| Frs3     | 1.1    | 1.5    | 0.9    | 0.6    | 0.7    | 1.7     | 1.4    | 0.8    | 1.3    | 0.9    | 0.9    | 0.9    |
| Fry      | 0.2    | 0.2    | 0.2    | 0.3    | 0.2    | 0.1     | 0.2    | 0.2    | 0.1    | 0.2    | 0.2    | 0.1    |
| Fryl     | 3.8    | 4.9    | 4.8    | 3.0    | 4.3    | 3.1     | 4.6    | 3.4    | 4.1    | 4.1    | 3.7    | 3.6    |
| Frzb     | 70.7   | 74.1   | 84.8   | 78.4   | 106.4  | 86.1    | 73.3   | 54.8   | 66.0   | 64.6   | 64.2   | 67.9   |
| Fsbp     | 0.3    | 0.8    | 1.0    | 0.4    | 0.5    | 0.7     | 0.6    | 0.7    | 0.4    | 0.5    | 0.5    | 0.4    |
| Fscn1    | 38.7   | 41.4   | 42.3   | 43.1   | 48.4   | 36.9    | 53.1   | 39.7   | 56.2   | 60.3   | 54.0   | 34.2   |
| Fscn2    | 0.0    | 0.0    | 0.0    | 0.1    | 0.0    | 0.0     | 0.0    | 0.1    | 0.1    | 0.1    | 0.0    | 0.0    |
| Fsd1     | 1.4    | 1.9    | 1.7    | 1.1    | 0.7    | 1.7     | 1.7    | 1.7    | 1.0    | 1.1    | 1.4    | 1.1    |
| Fsd1l    | 0.9    | 1.3    | 1.1    | 1.7    | 0.9    | 1.3     | 1.0    | 0.8    | 0.9    | 0.8    | 1.2    | 0.8    |
| Fsd2     | 0.1    | 0.1    | 0.2    | 0.2    | 0.2    | 0.2     | 0.2    | 0.1    | 0.0    | 0.1    | 0.1    | 0.1    |
| Fsip1    | 0.3    | 0.2    | 0.1    | 0.3    | 0.4    | 0.3     | 0.2    | 0.3    | 0.2    | 0.2    | 0.1    | 0.1    |
| Fst      | 21.2   | 19.9   | 28.9   | 10.4   | 18.0   | 13.7    | 19.7   | 15.0   | 21.2   | 65.5   | 43.8   | 47.9   |
| Fstl1    | 497.3  | 523.2  | 639.5  | 435.8  | 604.7  | 467.8   | 710.7  | 868.7  | 792.9  | 531.7  | 660.1  | 682.0  |
| Fstl3    | 9.9    | 7.1    | 4.2    | 10.5   | 7.7    | 10.3    | 10.5   | 6.3    | 8.3    | 7.2    | 8.1    | 7.1    |
| Fstl4    | 0.0    | 0.0    | 0.0    | 0.0    | 0.0    | 0.0     | 0.0    | 0.0    | 0.0    | 0.1    | 0.1    | 0.0    |
| Fstl5    | 0.0    | 0.0    | 0.0    | 0.0    | 0.0    | 0.1     | 0.0    | 0.0    | 0.0    | 0.0    | 0.0    | 0.0    |
| Fth1     | 1653.0 | 1693.9 | 1925.0 | 3377.4 | 4068.0 | 2505.3  | 1212.7 | 1384.7 | 697.6  | 1494.1 | 1203.7 | 1338.2 |
| Ftl1     | 6728.5 | 5479.7 | 2871.3 | 9390.9 | 6918.7 | 10883.5 | 3034.4 | 2878.7 | 2423.1 | 4218.3 | 3402.5 | 3164.2 |
| Fto      | 15.7   | 16.6   | 16.1   | 16.0   | 14.3   | 16.8    | 14.6   | 15.7   | 14.1   | 15.5   | 14.5   | 14.1   |
| Ftsj1    | 3.7    | 3.2    | 2.5    | 2.9    | 2.9    | 2.5     | 3.0    | 2.9    | 2.8    | 2.9    | 3.2    | 2.4    |
| Ftsj2    | 3.4    | 3.3    | 3.1    | 3.7    | 3.7    | 3.6     | 2.4    | 2.8    | 2.1    | 3.5    | 3.6    | 2.7    |
| Ftsj3    | 33.0   | 28.1   | 25.9   | 34.4   | 25.5   | 27.5    | 30.1   | 24.1   | 21.1   | 25.9   | 31.2   | 27.5   |
| Ftsjd1   | 2.3    | 1.8    | 1.5    | 2.8    | 2.3    | 2.6     | 2.0    | 1.6    | 1.9    | 2.4    | 1.8    | 1.6    |
| Ftsjd2   | 25.7   | 23.4   | 20.8   | 27.7   | 22.1   | 26.3    | 21.2   | 19.1   | 20.9   | 19.7   | 19.1   | 23.4   |
| Ftx      | 0.3    | 0.3    | 0.4    | 0.3    | 0.4    | 0.4     | 0.3    | 0.4    | 0.4    | 0.6    | 0.6    | 0.4    |

Online Table 1

|               |      |      |      |      |      |      |      |      |      |      |      |      |
|---------------|------|------|------|------|------|------|------|------|------|------|------|------|
| Fubp1         | 12.8 | 12.4 | 13.2 | 16.1 | 13.8 | 14.3 | 14.1 | 12.3 | 11.6 | 11.4 | 15.1 | 13.6 |
| Fubp3         | 11.3 | 10.9 | 12.2 | 12.8 | 11.3 | 12.3 | 13.0 | 12.2 | 10.5 | 11.7 | 13.8 | 13.3 |
| Fuca1         | 50.1 | 36.9 | 35.5 | 54.8 | 47.5 | 53.0 | 34.4 | 28.1 | 27.4 | 40.1 | 31.5 | 39.6 |
| Fuca2         | 14.7 | 10.9 | 9.8  | 16.2 | 12.3 | 13.9 | 8.3  | 7.7  | 7.2  | 9.7  | 9.6  | 13.0 |
| Fuk           | 3.1  | 2.9  | 2.5  | 2.5  | 2.3  | 3.3  | 2.1  | 2.2  | 2.6  | 2.6  | 2.5  | 1.8  |
| Fundc1        | 15.1 | 13.6 | 13.9 | 15.8 | 14.8 | 14.6 | 13.9 | 14.4 | 12.4 | 13.7 | 17.0 | 14.5 |
| Fundc2        | 14.9 | 11.4 | 10.5 | 15.3 | 12.4 | 14.1 | 9.8  | 9.7  | 10.0 | 12.9 | 12.5 | 11.8 |
| Fuom          | 6.9  | 7.0  | 7.1  | 8.1  | 5.6  | 6.4  | 6.0  | 6.3  | 6.1  | 7.2  | 6.4  | 7.1  |
| Furin         | 10.8 | 13.7 | 14.6 | 13.3 | 18.3 | 11.3 | 16.8 | 16.2 | 17.6 | 14.5 | 12.9 | 12.6 |
| Fus           | 2.7  | 5.4  | 6.9  | 4.1  | 5.5  | 3.5  | 6.9  | 6.4  | 6.5  | 6.4  | 6.5  | 5.6  |
| Fut10         | 7.9  | 7.4  | 7.7  | 7.3  | 6.8  | 9.0  | 7.2  | 6.0  | 6.6  | 6.5  | 6.8  | 6.6  |
| Fut11         | 2.7  | 4.1  | 6.2  | 2.2  | 3.8  | 3.5  | 4.0  | 6.9  | 6.5  | 4.8  | 3.6  | 5.1  |
| Fut4          | 0.5  | 0.7  | 0.6  | 0.6  | 1.0  | 0.9  | 0.8  | 0.7  | 0.8  | 0.8  | 0.6  | 0.7  |
| Fut7          | 0.0  | 0.0  | 0.1  | 0.6  | 0.3  | 0.1  | 0.1  | 0.0  | 0.0  | 0.0  | 0.0  | 0.1  |
| Fut8          | 12.3 | 14.2 | 16.4 | 12.2 | 11.8 | 10.8 | 13.2 | 12.9 | 11.3 | 13.4 | 12.9 | 13.4 |
| Fuz           | 4.1  | 5.9  | 5.8  | 4.4  | 4.0  | 5.6  | 3.9  | 3.5  | 4.0  | 5.2  | 4.1  | 4.9  |
| Fv1           | 2.1  | 2.1  | 2.7  | 2.3  | 2.4  | 3.3  | 2.5  | 2.0  | 1.8  | 2.8  | 2.3  | 3.2  |
| Fxn           | 1.9  | 1.9  | 1.4  | 1.5  | 1.8  | 1.2  | 2.1  | 1.7  | 2.4  | 1.6  | 2.6  | 2.0  |
| Fxr1          | 69.8 | 68.9 | 60.3 | 66.3 | 56.6 | 62.0 | 57.8 | 55.2 | 57.8 | 68.4 | 73.6 | 70.8 |
| Fxr2          | 29.8 | 29.7 | 25.2 | 31.4 | 25.0 | 31.4 | 29.3 | 24.6 | 28.0 | 28.4 | 31.5 | 30.1 |
| Fxyd1         | 5.8  | 16.8 | 32.8 | 4.5  | 6.2  | 4.1  | 4.8  | 15.7 | 6.9  | 4.0  | 4.1  | 6.2  |
| Fxyd2         | 0.2  | 0.4  | 0.8  | 0.9  | 0.7  | 0.3  | 0.2  | 0.2  | 0.4  | 0.4  | 0.8  | 0.4  |
| Fxyd3         | 0.0  | 0.0  | 0.5  | 0.0  | 0.0  | 0.2  | 0.0  | 0.6  | 0.1  | 0.1  | 0.0  | 0.2  |
| Fxyd5         | 29.0 | 13.4 | 16.3 | 85.6 | 70.2 | 29.8 | 29.8 | 11.2 | 7.9  | 14.5 | 15.1 | 15.7 |
| Fxyd6         | 4.0  | 5.4  | 12.3 | 2.8  | 5.6  | 2.5  | 4.4  | 23.4 | 10.3 | 9.7  | 6.7  | 10.8 |
| Fxyd7         | 0.1  | 0.1  | 0.0  | 0.0  | 0.1  | 0.0  | 0.0  | 0.3  | 0.0  | 0.0  | 0.0  | 0.0  |
| Fyb           | 1.4  | 0.0  | 0.3  | 13.5 | 22.9 | 0.2  | 3.1  | 0.3  | 0.5  | 1.6  | 0.5  | 1.4  |
| Fyco1         | 7.1  | 7.6  | 7.5  | 8.0  | 6.7  | 9.5  | 7.1  | 7.2  | 5.8  | 6.1  | 5.7  | 6.7  |
| Fyn           | 15.8 | 13.6 | 12.2 | 17.8 | 14.1 | 18.0 | 18.2 | 14.5 | 14.0 | 11.8 | 16.4 | 11.9 |
| Fytd1         | 15.1 | 15.4 | 14.9 | 13.2 | 14.1 | 14.9 | 13.6 | 14.5 | 14.9 | 16.8 | 15.7 | 16.2 |
| Fzd1          | 6.0  | 8.7  | 14.3 | 5.2  | 7.8  | 4.8  | 10.5 | 14.1 | 14.5 | 22.1 | 13.0 | 15.8 |
| Fzd10         | 0.1  | 0.1  | 0.1  | 0.2  | 0.1  | 0.1  | 0.0  | 0.0  | 0.1  | 0.0  | 0.1  | 0.0  |
| Fzd2          | 19.2 | 22.1 | 20.3 | 15.7 | 16.0 | 16.7 | 20.7 | 28.8 | 27.9 | 15.0 | 15.8 | 18.1 |
| Fzd3          | 0.8  | 0.8  | 0.7  | 0.7  | 0.7  | 0.8  | 0.7  | 0.8  | 0.7  | 1.4  | 1.2  | 1.0  |
| Fzd4          | 4.8  | 10.9 | 15.9 | 2.8  | 5.9  | 3.1  | 7.7  | 12.3 | 9.3  | 5.3  | 6.2  | 6.1  |
| Fzd5          | 7.1  | 8.1  | 11.8 | 6.1  | 9.0  | 5.4  | 14.3 | 13.3 | 18.2 | 6.6  | 10.8 | 11.3 |
| Fzd6          | 4.2  | 1.7  | 1.7  | 2.3  | 1.3  | 1.9  | 1.3  | 1.9  | 2.0  | 4.2  | 3.4  | 3.8  |
| Fzd7          | 7.9  | 10.0 | 11.0 | 7.4  | 8.2  | 7.5  | 10.2 | 10.6 | 11.0 | 11.7 | 10.7 | 10.9 |
| Fzd8          | 7.4  | 8.9  | 11.6 | 6.9  | 7.2  | 6.3  | 11.3 | 14.7 | 17.1 | 8.1  | 8.3  | 9.2  |
| Fzd9          | 0.2  | 0.1  | 0.0  | 0.1  | 0.1  | 0.2  | 0.1  | 0.2  | 0.1  | 0.1  | 0.1  | 0.1  |
| Fzr1          | 3.7  | 4.5  | 5.3  | 4.6  | 6.1  | 4.0  | 5.9  | 5.3  | 6.2  | 5.4  | 4.0  | 5.1  |
| G0s2          | 43.4 | 79.3 | 96.7 | 43.9 | 42.9 | 92.7 | 44.7 | 83.5 | 69.9 | 23.0 | 28.8 | 43.7 |
| G2e3          | 0.8  | 1.4  | 2.0  | 0.8  | 1.8  | 0.8  | 2.2  | 1.5  | 2.1  | 2.0  | 2.0  | 2.0  |
| G3bp1         | 46.7 | 45.7 | 43.0 | 46.3 | 51.3 | 45.6 | 52.2 | 46.1 | 45.7 | 50.2 | 54.0 | 46.7 |
| G3bp2         | 33.3 | 32.3 | 32.7 | 39.9 | 34.0 | 34.3 | 31.5 | 29.0 | 28.5 | 37.3 | 36.6 | 37.5 |
| G530011O06Rik | 1.2  | 2.6  | 2.8  | 1.9  | 3.7  | 1.8  | 1.6  | 1.5  | 1.8  | 1.7  | 1.6  | 1.2  |
| G630025P09Rik | 0.4  | 0.8  | 0.7  | 0.4  | 0.5  | 0.5  | 0.5  | 0.9  | 0.6  | 0.4  | 0.4  | 0.8  |
| G630071F17Rik | 0.3  | 0.4  | 0.2  | 0.4  | 0.5  | 0.3  | 0.5  | 0.6  | 0.6  | 0.3  | 0.5  | 0.7  |
| G630090E17Rik | 1.2  | 1.5  | 1.5  | 1.3  | 1.5  | 1.2  | 1.0  | 1.5  | 1.2  | 1.3  | 1.5  | 1.2  |
| G6pc3         | 14.5 | 13.3 | 10.8 | 15.3 | 12.6 | 19.2 | 13.5 | 12.9 | 12.4 | 12.8 | 10.4 | 10.6 |
| G6pd2         | 0.0  | 0.1  | 0.0  | 0.1  | 0.0  | 0.1  | 0.0  | 0.1  | 0.0  | 0.0  | 0.0  | 0.0  |
| G6pdx         | 30.6 | 34.6 | 32.2 | 29.3 | 41.2 | 22.7 | 25.4 | 47.2 | 23.4 | 25.7 | 30.2 | 24.8 |
| G730013B05Rik | 0.0  | 0.0  | 0.0  | 0.0  | 0.1  | 0.1  | 0.1  | 0.0  | 0.1  | 0.0  | 0.0  | 0.0  |
| Gaa           | 50.4 | 48.2 | 53.6 | 52.0 | 47.8 | 56.5 | 39.9 | 48.2 | 41.4 | 49.7 | 39.5 | 42.7 |
| Gab1          | 7.8  | 10.7 | 14.1 | 6.2  | 6.7  | 6.5  | 8.5  | 11.8 | 11.3 | 8.0  | 8.8  | 9.9  |
| Gab2          | 8.7  | 9.6  | 10.1 | 9.6  | 9.7  | 6.5  | 10.0 | 9.7  | 8.7  | 7.3  | 9.2  | 11.1 |
| Gab3          | 0.2  | 0.3  | 0.2  | 0.4  | 0.5  | 0.1  | 0.3  | 0.2  | 0.3  | 0.2  | 0.3  | 0.2  |

Online Table 1

|            |       |       |       |       |       |       |       |       |       |       |       |       |
|------------|-------|-------|-------|-------|-------|-------|-------|-------|-------|-------|-------|-------|
| Gabarap    | 277.7 | 220.4 | 210.3 | 286.5 | 225.2 | 276.2 | 234.6 | 266.6 | 220.9 | 243.8 | 269.5 | 260.1 |
| Gabarap1   | 110.1 | 80.4  | 73.1  | 133.8 | 80.2  | 129.0 | 84.5  | 69.3  | 79.3  | 131.0 | 98.9  | 106.3 |
| Gabarap2   | 78.8  | 68.3  | 54.9  | 74.9  | 65.4  | 71.7  | 56.7  | 55.5  | 68.4  | 74.0  | 70.4  | 69.7  |
| Gabbr1     | 1.8   | 1.8   | 1.8   | 1.7   | 1.4   | 1.7   | 1.8   | 1.8   | 2.1   | 1.5   | 1.7   | 1.9   |
| Gabbr2     | 0.0   | 0.0   | 0.0   | 0.0   | 0.0   | 0.0   | 0.0   | 0.0   | 0.0   | 0.0   | 0.0   | 0.0   |
| Gabpa      | 11.5  | 10.5  | 12.3  | 12.0  | 11.8  | 11.7  | 12.7  | 12.4  | 11.0  | 14.1  | 14.5  | 16.3  |
| Gabpb1     | 6.8   | 7.2   | 7.2   | 6.2   | 6.6   | 7.3   | 6.9   | 7.4   | 7.1   | 6.9   | 7.1   | 7.1   |
| Gabpb2     | 3.4   | 4.1   | 4.6   | 3.2   | 4.1   | 3.1   | 4.2   | 4.7   | 4.0   | 3.9   | 4.3   | 4.8   |
| Gabra1     | 0.3   | 0.1   | 0.0   | 0.1   | 0.0   | 0.1   | 0.1   | 0.1   | 0.0   | 0.1   | 0.2   | 0.1   |
| Gabra3     | 0.5   | 0.7   | 0.6   | 0.2   | 0.3   | 0.1   | 0.4   | 0.4   | 1.0   | 0.9   | 0.6   | 1.3   |
| Gabra4     | 0.0   | 0.0   | 0.0   | 0.0   | 0.0   | 0.0   | 0.0   | 0.1   | 0.1   | 1.7   | 1.0   | 0.4   |
| Gabrb1     | 1.1   | 0.4   | 0.1   | 0.5   | 0.2   | 0.2   | 0.2   | 0.2   | 0.4   | 3.9   | 2.2   | 1.1   |
| Gabrb2     | 0.0   | 0.0   | 0.0   | 0.0   | 0.0   | 0.0   | 0.0   | 0.0   | 0.0   | 0.0   | 0.0   | 0.0   |
| Gabrb3     | 0.1   | 0.0   | 0.0   | 0.1   | 0.0   | 0.1   | 0.0   | 0.0   | 0.0   | 0.2   | 0.1   | 0.1   |
| Gabrd      | 0.2   | 0.1   | 0.1   | 0.0   | 0.1   | 0.0   | 0.1   | 0.0   | 0.1   | 0.1   | 0.1   | 0.1   |
| Gabre      | 0.1   | 0.2   | 0.2   | 0.0   | 0.1   | 0.0   | 0.2   | 0.1   | 0.2   | 0.2   | 0.1   | 0.1   |
| Gabrp      | 0.0   | 0.0   | 0.0   | 0.0   | 0.0   | 0.0   | 0.0   | 0.0   | 0.0   | 0.0   | 0.0   | 0.0   |
| Gabrr2     | 0.0   | 0.0   | 0.0   | 0.0   | 0.0   | 0.0   | 0.0   | 0.0   | 0.1   | 0.0   | 0.0   | 0.0   |
| Gadd45a    | 20.4  | 11.4  | 11.9  | 23.1  | 15.4  | 31.1  | 13.1  | 10.8  | 8.8   | 15.4  | 15.0  | 13.2  |
| Gadd45b    | 26.0  | 22.1  | 21.2  | 29.1  | 26.3  | 22.7  | 30.2  | 34.8  | 30.1  | 19.3  | 23.2  | 17.9  |
| Gadd45g    | 103.0 | 100.7 | 104.4 | 136.6 | 90.5  | 71.2  | 128.8 | 87.2  | 142.3 | 91.9  | 103.2 | 131.8 |
| Gadd45gjp1 | 12.4  | 10.0  | 9.8   | 11.9  | 9.1   | 12.4  | 12.7  | 12.0  | 10.8  | 12.6  | 11.6  | 9.9   |
| Gadl1      | 0.0   | 0.0   | 0.0   | 0.0   | 0.0   | 0.0   | 0.0   | 0.0   | 0.0   | 0.0   | 0.0   | 0.0   |
| Gak        | 22.8  | 21.1  | 19.0  | 26.1  | 23.6  | 23.5  | 23.7  | 21.2  | 21.3  | 19.0  | 20.8  | 20.9  |
| Gal        | 0.4   | 0.4   | 0.6   | 0.1   | 0.6   | 0.7   | 0.3   | 0.1   | 0.0   | 0.1   | 0.1   | 0.1   |
| Gal3st1    | 1.1   | 0.8   | 0.8   | 1.1   | 0.6   | 1.3   | 0.7   | 1.3   | 1.2   | 0.6   | 0.9   | 0.6   |
| Gal3st2    | 13.4  | 10.1  | 10.0  | 11.1  | 12.0  | 3.7   | 16.1  | 9.9   | 11.1  | 8.1   | 11.2  | 8.4   |
| Gal3st3    | 0.0   | 0.0   | 0.0   | 0.1   | 0.0   | 0.0   | 0.1   | 0.0   | 0.0   | 0.1   | 0.0   | 0.0   |
| Gal3st4    | 0.7   | 0.9   | 1.2   | 1.0   | 1.0   | 1.2   | 1.2   | 1.3   | 1.1   | 1.2   | 0.7   | 0.9   |
| Galc       | 2.4   | 2.2   | 2.3   | 4.0   | 3.6   | 3.2   | 2.7   | 2.0   | 2.3   | 2.6   | 2.5   | 2.7   |
| Gale       | 5.4   | 5.2   | 3.4   | 3.9   | 4.2   | 3.4   | 5.9   | 6.2   | 5.0   | 4.8   | 5.1   | 3.2   |
| Galk1      | 16.9  | 17.4  | 13.6  | 12.7  | 15.0  | 15.9  | 18.6  | 19.4  | 18.8  | 17.1  | 15.2  | 15.4  |
| Galk2      | 23.4  | 25.3  | 23.2  | 24.4  | 22.1  | 29.4  | 22.0  | 21.3  | 20.2  | 17.1  | 18.7  | 20.1  |
| Galm       | 14.0  | 11.7  | 9.0   | 15.8  | 9.1   | 16.0  | 8.1   | 6.1   | 7.2   | 8.3   | 8.7   | 8.9   |
| Galns      | 8.2   | 7.3   | 7.8   | 10.7  | 10.0  | 9.9   | 9.2   | 6.9   | 7.3   | 7.5   | 8.2   | 8.1   |
| Galnt1     | 36.8  | 31.6  | 32.0  | 39.3  | 36.6  | 37.1  | 36.0  | 31.4  | 34.0  | 36.5  | 39.0  | 40.5  |
| Galnt10    | 19.0  | 16.1  | 16.8  | 26.7  | 23.6  | 30.4  | 27.2  | 22.9  | 24.1  | 20.7  | 20.8  | 22.0  |
| Galnt11    | 15.1  | 15.9  | 13.6  | 13.6  | 13.6  | 13.7  | 14.9  | 12.7  | 13.7  | 14.6  | 13.8  | 15.9  |
| Galnt12    | 1.1   | 1.1   | 1.9   | 1.5   | 2.1   | 0.5   | 1.0   | 1.2   | 1.1   | 1.0   | 0.9   | 1.1   |
| Galnt14    | 0.0   | 0.1   | 0.0   | 0.0   | 0.0   | 0.0   | 0.1   | 0.0   | 0.0   | 0.0   | 0.0   | 0.0   |
| Galnt15    | 0.1   | 0.1   | 0.3   | 0.0   | 0.0   | 0.1   | 0.1   | 0.0   | 0.0   | 0.2   | 0.0   | 0.0   |
| Galnt16    | 1.2   | 1.1   | 1.9   | 1.4   | 0.9   | 1.8   | 1.2   | 2.6   | 2.1   | 0.9   | 1.3   | 1.5   |
| Galnt18    | 6.2   | 2.9   | 2.3   | 7.0   | 5.0   | 6.0   | 6.1   | 4.8   | 4.9   | 8.3   | 11.2  | 4.0   |
| Galnt2     | 41.2  | 38.7  | 36.8  | 37.9  | 37.8  | 44.0  | 44.6  | 46.7  | 44.9  | 41.3  | 41.4  | 46.9  |
| Galnt3     | 0.1   | 0.0   | 0.0   | 0.2   | 0.9   | 0.0   | 0.1   | 0.1   | 0.0   | 0.1   | 0.1   | 0.1   |
| Galnt4     | 6.6   | 6.4   | 8.6   | 5.1   | 5.7   | 5.7   | 6.8   | 10.3  | 7.7   | 8.3   | 8.8   | 9.2   |
| Galnt5     | 0.0   | 0.0   | 0.0   | 0.0   | 0.0   | 0.0   | 0.1   | 0.0   | 0.0   | 0.0   | 0.1   | 0.0   |
| Galnt6     | 0.1   | 0.0   | 0.0   | 1.3   | 1.4   | 0.0   | 0.1   | 0.0   | 0.0   | 0.1   | 0.0   | 0.1   |
| Galnt7     | 5.6   | 6.7   | 6.3   | 7.1   | 6.8   | 5.7   | 5.4   | 5.1   | 4.1   | 4.3   | 5.0   | 5.6   |
| Galnt9     | 0.0   | 0.0   | 0.0   | 0.1   | 0.2   | 0.0   | 0.1   | 0.0   | 0.0   | 0.0   | 0.0   | 0.0   |
| Galr2      | 0.2   | 0.1   | 0.1   | 0.2   | 0.2   | 0.1   | 0.1   | 0.2   | 0.1   | 0.1   | 0.3   | 0.1   |
| Galt       | 4.2   | 4.3   | 5.1   | 4.6   | 4.2   | 4.3   | 5.1   | 6.3   | 4.7   | 3.6   | 4.7   | 4.7   |
| Gamt       | 6.8   | 7.7   | 5.1   | 8.9   | 6.2   | 7.4   | 5.0   | 8.3   | 8.3   | 5.7   | 5.3   | 5.5   |
| Gan        | 3.2   | 3.1   | 3.4   | 3.8   | 3.7   | 3.2   | 4.1   | 3.1   | 3.4   | 2.6   | 3.0   | 3.3   |
| Ganab      | 62.5  | 62.8  | 57.2  | 59.4  | 59.0  | 65.3  | 58.0  | 63.9  | 60.6  | 61.3  | 57.1  | 56.6  |
| Ganc       | 4.6   | 4.8   | 5.0   | 4.4   | 3.7   | 4.3   | 4.1   | 4.5   | 3.7   | 4.5   | 4.6   | 4.6   |
| Gap43      | 0.1   | 0.0   | 0.2   | 0.1   | 0.2   | 0.0   | 0.2   | 0.2   | 0.1   | 0.3   | 0.2   | 0.2   |

Online Table 1

|         |       |       |       |       |       |       |       |       |       |       |       |       |
|---------|-------|-------|-------|-------|-------|-------|-------|-------|-------|-------|-------|-------|
| Gapdh   | 231.0 | 192.0 | 186.8 | 328.8 | 246.0 | 249.6 | 250.8 | 229.3 | 174.9 | 200.4 | 238.4 | 213.9 |
| Gapdhs  | 0.0   | 0.1   | 0.1   | 0.0   | 0.1   | 0.0   | 0.0   | 0.0   | 0.1   | 0.0   | 0.0   | 0.0   |
| Gapvd1  | 11.9  | 11.2  | 10.1  | 11.1  | 12.4  | 11.0  | 11.1  | 10.9  | 11.3  | 10.9  | 11.8  | 10.9  |
| Gar1    | 2.2   | 2.1   | 3.3   | 4.3   | 4.0   | 4.1   | 3.7   | 3.0   | 3.8   | 4.2   | 4.8   | 4.2   |
| Garem   | 1.0   | 0.8   | 0.8   | 0.6   | 0.4   | 0.8   | 0.5   | 0.6   | 0.5   | 1.0   | 0.8   | 0.5   |
| Gareml  | 4.8   | 9.2   | 8.9   | 4.5   | 9.4   | 4.4   | 10.1  | 10.4  | 12.2  | 7.8   | 5.6   | 8.0   |
| Garnl3  | 4.0   | 4.0   | 3.5   | 3.5   | 3.9   | 3.4   | 4.0   | 4.4   | 3.5   | 3.3   | 3.7   | 3.4   |
| Gars    | 129.3 | 97.3  | 78.6  | 105.3 | 92.4  | 99.7  | 100.8 | 118.7 | 103.2 | 82.5  | 117.9 | 86.9  |
| Gart    | 15.8  | 13.4  | 11.8  | 14.0  | 15.7  | 15.3  | 13.6  | 14.1  | 12.4  | 14.3  | 15.1  | 11.9  |
| Gas1    | 2.2   | 2.3   | 9.0   | 0.7   | 0.9   | 0.4   | 1.8   | 6.6   | 4.6   | 12.3  | 3.8   | 6.0   |
| Gas2    | 1.0   | 0.9   | 1.4   | 0.8   | 1.0   | 1.2   | 1.0   | 1.9   | 1.4   | 1.0   | 1.5   | 1.0   |
| Gas2l1  | 18.4  | 16.3  | 11.4  | 17.9  | 15.9  | 17.1  | 20.0  | 15.1  | 18.6  | 16.2  | 15.9  | 14.4  |
| Gas2l3  | 0.7   | 1.0   | 1.7   | 0.9   | 2.2   | 0.6   | 2.0   | 0.7   | 1.6   | 0.8   | 1.3   | 0.9   |
| Gas5    | 28.8  | 25.6  | 25.2  | 22.5  | 26.9  | 24.1  | 22.6  | 29.4  | 32.1  | 31.8  | 32.1  | 32.5  |
| Gas6    | 303.8 | 361.2 | 551.0 | 311.6 | 366.1 | 287.1 | 335.3 | 424.0 | 387.0 | 450.4 | 435.4 | 665.1 |
| Gas7    | 4.0   | 5.6   | 8.8   | 3.4   | 7.7   | 3.7   | 5.5   | 15.1  | 4.3   | 3.1   | 3.9   | 3.5   |
| Gas8    | 10.1  | 7.7   | 10.9  | 13.5  | 8.0   | 11.9  | 12.2  | 9.9   | 8.8   | 10.2  | 12.2  | 12.1  |
| Gata2   | 1.4   | 1.1   | 0.7   | 2.2   | 1.1   | 1.8   | 1.2   | 0.5   | 0.9   | 0.9   | 0.8   | 0.8   |
| Gata3   | 0.4   | 0.6   | 0.3   | 0.5   | 0.4   | 0.3   | 0.5   | 0.4   | 0.5   | 0.4   | 0.3   | 0.4   |
| Gata4   | 20.1  | 23.5  | 19.9  | 20.7  | 14.4  | 20.8  | 16.0  | 16.0  | 16.5  | 12.4  | 13.2  | 17.1  |
| Gata5   | 0.0   | 0.0   | 0.0   | 0.0   | 0.0   | 0.0   | 0.0   | 0.0   | 0.1   | 1.3   | 0.6   | 0.2   |
| Gata6   | 6.4   | 6.3   | 6.4   | 5.2   | 3.9   | 4.9   | 5.2   | 6.4   | 5.7   | 14.0  | 7.8   | 7.5   |
| Gatad1  | 48.2  | 41.5  | 36.1  | 45.3  | 37.5  | 44.4  | 40.3  | 33.5  | 37.7  | 40.3  | 42.3  | 41.7  |
| Gatad2a | 13.1  | 12.7  | 12.1  | 15.5  | 13.8  | 14.2  | 15.9  | 14.7  | 13.4  | 11.9  | 14.4  | 12.2  |
| Gatad2b | 2.4   | 2.9   | 4.4   | 2.9   | 2.9   | 3.1   | 2.9   | 3.9   | 3.2   | 2.9   | 3.3   | 2.9   |
| Gatc    | 5.2   | 6.4   | 6.0   | 7.2   | 6.3   | 7.9   | 6.0   | 6.7   | 5.6   | 4.8   | 5.9   | 5.2   |
| Gatm    | 0.3   | 0.1   | 0.2   | 0.4   | 0.9   | 0.3   | 0.5   | 0.5   | 1.0   | 4.5   | 1.9   | 1.3   |
| Gatsl2  | 2.5   | 3.7   | 4.7   | 3.0   | 3.3   | 3.2   | 3.1   | 3.9   | 3.5   | 3.0   | 3.1   | 3.2   |
| Gatsl3  | 17.0  | 15.5  | 15.4  | 14.6  | 14.9  | 16.9  | 17.1  | 17.1  | 17.9  | 14.1  | 12.3  | 14.0  |
| Gba     | 78.2  | 58.1  | 59.3  | 79.1  | 69.0  | 75.6  | 54.9  | 57.5  | 51.0  | 56.5  | 52.3  | 69.3  |
| Gba2    | 2.0   | 2.4   | 2.4   | 1.9   | 2.6   | 2.2   | 2.3   | 2.6   | 2.9   | 2.9   | 2.5   | 2.7   |
| Gbas    | 16.6  | 15.4  | 15.6  | 17.4  | 14.4  | 15.9  | 14.4  | 17.9  | 14.8  | 13.7  | 15.9  | 17.8  |
| Gbe1    | 18.9  | 15.0  | 8.6   | 29.6  | 17.3  | 35.3  | 6.7   | 7.2   | 4.9   | 7.2   | 6.7   | 6.3   |
| Gbf1    | 12.2  | 14.0  | 14.7  | 10.9  | 13.0  | 11.1  | 13.9  | 14.4  | 13.2  | 11.4  | 12.3  | 12.1  |
| Gbgt1   | 1.2   | 1.0   | 0.9   | 0.7   | 0.5   | 0.8   | 0.4   | 0.4   | 0.2   | 0.8   | 0.6   | 0.7   |
| Gbp1    | 0.0   | 0.0   | 0.0   | 0.0   | 0.0   | 0.0   | 0.1   | 0.0   | 0.0   | 0.0   | 0.0   | 0.0   |
| Gbp10   | 1.5   | 1.2   | 2.4   | 3.1   | 1.9   | 1.5   | 0.9   | 1.0   | 0.6   | 0.8   | 0.8   | 1.4   |
| Gbp11   | 0.2   | 0.1   | 0.2   | 0.2   | 0.2   | 0.1   | 0.1   | 0.1   | 0.0   | 0.0   | 0.0   | 0.1   |
| Gbp2    | 13.9  | 8.1   | 12.3  | 20.9  | 14.4  | 8.7   | 12.7  | 13.4  | 11.3  | 9.5   | 11.5  | 17.3  |
| Gbp3    | 10.2  | 5.4   | 9.1   | 19.6  | 8.5   | 7.8   | 5.0   | 3.1   | 4.1   | 2.9   | 2.8   | 9.5   |
| Gbp4    | 0.3   | 0.2   | 0.1   | 0.7   | 0.4   | 0.2   | 0.1   | 0.0   | 0.0   | 0.1   | 0.0   | 0.1   |
| Gbp5    | 1.1   | 0.6   | 1.9   | 1.7   | 1.9   | 0.9   | 1.1   | 0.9   | 0.7   | 0.4   | 0.5   | 1.6   |
| Gbp6    | 3.5   | 2.0   | 4.3   | 5.3   | 3.4   | 2.7   | 1.7   | 1.9   | 1.2   | 1.4   | 1.2   | 3.0   |
| Gbp7    | 2.3   | 2.3   | 3.7   | 3.3   | 2.5   | 2.4   | 2.3   | 2.1   | 2.2   | 1.7   | 2.1   | 3.9   |
| Gbp8    | 0.5   | 0.6   | 0.3   | 0.6   | 0.5   | 0.4   | 0.2   | 0.1   | 0.0   | 0.1   | 0.2   | 0.2   |
| Gbp9    | 2.1   | 1.5   | 2.4   | 4.9   | 2.3   | 2.6   | 1.3   | 1.0   | 1.0   | 0.7   | 0.9   | 1.5   |
| Gbx1    | 0.1   | 0.1   | 0.1   | 0.2   | 0.1   | 0.1   | 0.2   | 0.1   | 0.1   | 0.1   | 0.1   | 0.0   |
| Gbx2    | 0.1   | 0.6   | 1.7   | 0.1   | 1.4   | 0.0   | 1.9   | 2.4   | 3.0   | 1.6   | 1.2   | 1.8   |
| Gca     | 2.6   | 2.7   | 2.4   | 3.1   | 2.2   | 3.2   | 2.4   | 1.9   | 2.2   | 1.7   | 2.1   | 2.0   |
| Gcat    | 2.1   | 2.5   | 2.4   | 1.4   | 1.8   | 2.4   | 3.1   | 3.4   | 3.0   | 1.5   | 2.2   | 1.5   |
| Gcc1    | 9.6   | 9.1   | 8.0   | 10.8  | 7.6   | 10.0  | 8.4   | 9.2   | 9.6   | 8.0   | 9.0   | 8.3   |
| Gcc2    | 10.1  | 12.0  | 12.3  | 10.3  | 9.2   | 10.6  | 8.7   | 9.5   | 8.7   | 9.1   | 10.9  | 10.6  |
| Gcdh    | 9.7   | 9.8   | 10.6  | 7.9   | 8.2   | 9.3   | 6.9   | 8.5   | 8.5   | 9.8   | 8.8   | 9.1   |
| Gcfc2   | 1.8   | 1.9   | 1.9   | 2.0   | 1.8   | 2.1   | 1.8   | 1.8   | 1.5   | 1.8   | 2.0   | 2.0   |
| Gcgr    | 0.0   | 0.0   | 0.1   | 0.0   | 0.0   | 0.0   | 0.0   | 0.0   | 0.0   | 0.1   | 0.0   | 0.0   |
| Gch1    | 3.3   | 2.1   | 1.8   | 3.2   | 4.3   | 1.9   | 2.4   | 1.1   | 1.2   | 3.3   | 1.9   | 1.5   |
| Gchfr   | 0.6   | 0.3   | 0.4   | 0.1   | 0.2   | 0.5   | 0.0   | 0.1   | 0.2   | 0.1   | 0.1   | 0.2   |

Online Table 1

|         |       |       |       |       |       |       |       |       |       |       |       |       |
|---------|-------|-------|-------|-------|-------|-------|-------|-------|-------|-------|-------|-------|
| Gck     | 0.0   | 0.1   | 0.1   | 0.0   | 0.0   | 0.1   | 0.1   | 0.0   | 0.0   | 0.1   | 0.0   | 0.1   |
| Gckr    | 0.0   | 0.0   | 0.0   | 0.0   | 0.0   | 0.0   | 0.0   | 0.0   | 0.0   | 0.0   | 0.0   | 0.0   |
| Gclc    | 19.7  | 14.5  | 11.9  | 25.1  | 18.0  | 23.8  | 12.3  | 9.9   | 7.6   | 13.6  | 13.4  | 10.6  |
| Gclm    | 70.7  | 61.0  | 31.8  | 131.1 | 73.6  | 118.1 | 37.0  | 32.9  | 21.3  | 36.4  | 35.2  | 28.0  |
| Gcm1    | 0.1   | 0.1   | 0.1   | 0.1   | 0.1   | 0.2   | 0.1   | 0.0   | 0.0   | 0.0   | 0.1   | 0.0   |
| Gcn1l1  | 14.8  | 16.1  | 14.4  | 14.1  | 15.2  | 15.8  | 14.9  | 15.3  | 15.4  | 14.4  | 12.5  | 12.3  |
| Gcnt1   | 1.0   | 0.4   | 0.4   | 3.5   | 6.2   | 0.5   | 0.7   | 0.7   | 0.7   | 3.6   | 1.5   | 1.6   |
| Gcnt2   | 7.3   | 7.3   | 6.2   | 7.8   | 8.4   | 5.1   | 5.9   | 5.0   | 5.8   | 10.0  | 8.0   | 6.6   |
| Gcnt4   | 0.1   | 0.3   | 1.0   | 0.1   | 0.5   | 0.2   | 0.6   | 1.3   | 1.4   | 1.1   | 1.0   | 1.4   |
| Gcnt7   | 0.3   | 0.2   | 0.4   | 0.6   | 0.4   | 0.3   | 0.3   | 0.3   | 0.1   | 0.2   | 0.2   | 0.3   |
| Gcsh    | 41.2  | 30.7  | 25.5  | 45.9  | 35.7  | 39.4  | 33.1  | 31.0  | 31.0  | 32.4  | 37.2  | 32.8  |
| Gda     | 4.4   | 4.7   | 5.3   | 3.8   | 4.7   | 2.0   | 4.3   | 5.3   | 4.7   | 5.7   | 4.7   | 7.7   |
| Gdap1   | 0.7   | 0.4   | 0.3   | 0.7   | 0.3   | 0.9   | 0.6   | 0.4   | 0.4   | 0.4   | 0.5   | 0.4   |
| Gdap10  | 0.4   | 0.8   | 0.5   | 0.5   | 0.7   | 0.6   | 0.3   | 0.4   | 0.2   | 0.3   | 0.2   | 0.3   |
| Gdap1l1 | 0.1   | 0.0   | 0.1   | 0.2   | 0.1   | 0.2   | 0.0   | 0.0   | 0.1   | 0.0   | 0.1   | 0.0   |
| Gdap2   | 8.1   | 8.9   | 8.2   | 8.6   | 8.5   | 8.8   | 7.8   | 7.9   | 8.3   | 7.6   | 8.6   | 8.8   |
| Gde1    | 30.5  | 24.4  | 20.9  | 35.2  | 29.8  | 31.2  | 25.9  | 20.7  | 21.5  | 30.9  | 27.3  | 25.1  |
| Gdf1    | 0.1   | 0.3   | 0.4   | 0.1   | 0.1   | 0.1   | 0.1   | 0.1   | 0.1   | 0.1   | 0.1   | 0.1   |
| Gdf10   | 0.0   | 0.0   | 0.4   | 0.0   | 0.0   | 0.0   | 0.1   | 0.7   | 0.1   | 0.0   | 0.0   | 0.0   |
| Gdf11   | 6.0   | 7.7   | 7.1   | 6.6   | 6.7   | 8.0   | 9.1   | 6.4   | 7.2   | 6.7   | 9.0   | 7.8   |
| Gdf15   | 23.4  | 20.7  | 13.3  | 26.1  | 22.5  | 34.2  | 13.3  | 6.3   | 9.9   | 13.1  | 9.8   | 6.3   |
| Gdf2    | 0.0   | 0.0   | 0.0   | 0.0   | 0.0   | 0.0   | 0.0   | 0.1   | 0.0   | 0.0   | 0.0   | 0.0   |
| Gdf3    | 0.0   | 0.0   | 0.0   | 0.1   | 0.1   | 0.1   | 0.1   | 0.0   | 0.0   | 0.1   | 0.0   | 0.1   |
| Gdf5    | 0.1   | 0.0   | 0.0   | 0.0   | 0.1   | 0.1   | 0.0   | 0.0   | 0.0   | 0.0   | 0.0   | 0.1   |
| Gdf6    | 139.2 | 130.3 | 118.4 | 115.5 | 118.3 | 100.8 | 125.4 | 55.7  | 93.4  | 102.9 | 86.6  | 113.5 |
| Gdf7    | 0.0   | 0.0   | 0.0   | 0.0   | 0.1   | 0.0   | 0.0   | 0.1   | 0.1   | 0.0   | 0.1   | 0.2   |
| Gdf9    | 0.4   | 0.5   | 0.4   | 0.7   | 0.4   | 0.4   | 0.6   | 0.8   | 0.5   | 0.4   | 0.5   | 0.7   |
| Gdi1    | 27.2  | 30.6  | 32.3  | 32.7  | 24.6  | 31.9  | 30.6  | 30.8  | 31.0  | 26.4  | 30.1  | 27.8  |
| Gdi2    | 167.0 | 143.1 | 137.7 | 165.5 | 155.3 | 163.5 | 140.2 | 142.7 | 136.6 | 155.0 | 167.7 | 163.0 |
| Gdnf    | 0.7   | 0.3   | 0.2   | 0.7   | 0.7   | 0.5   | 1.3   | 0.3   | 0.9   | 0.7   | 0.8   | 0.8   |
| Gdpd1   | 5.9   | 3.4   | 3.1   | 5.4   | 5.5   | 6.2   | 2.5   | 2.7   | 2.2   | 5.5   | 3.9   | 3.9   |
| Gdpd2   | 0.0   | 0.0   | 0.0   | 0.0   | 0.0   | 0.0   | 0.0   | 0.1   | 0.2   | 1.4   | 0.4   | 0.5   |
| Gdpd3   | 0.2   | 0.6   | 0.2   | 0.1   | 0.5   | 0.1   | 0.2   | 0.4   | 0.2   | 0.4   | 0.5   | 0.3   |
| Gdpd4   | 0.0   | 0.0   | 0.1   | 0.1   | 0.0   | 0.0   | 0.0   | 0.0   | 0.0   | 0.1   | 0.0   | 0.1   |
| Gdpd5   | 1.2   | 0.9   | 0.9   | 1.8   | 2.0   | 0.9   | 0.9   | 1.1   | 1.0   | 1.2   | 1.1   | 0.8   |
| Gdpgp1  | 0.9   | 1.1   | 0.9   | 1.4   | 1.0   | 1.2   | 1.2   | 1.1   | 1.0   | 1.0   | 1.2   | 0.8   |
| Gem     | 0.6   | 1.0   | 1.9   | 0.6   | 1.1   | 0.7   | 0.7   | 1.5   | 0.7   | 1.1   | 1.0   | 0.5   |
| Gemin2  | 2.5   | 3.2   | 2.6   | 2.3   | 2.7   | 3.0   | 2.6   | 2.3   | 3.2   | 2.3   | 2.8   | 2.6   |
| Gemin4  | 5.4   | 5.4   | 4.4   | 5.2   | 5.3   | 4.8   | 5.3   | 5.1   | 4.3   | 4.8   | 5.4   | 4.4   |
| Gemin5  | 4.2   | 4.1   | 3.5   | 4.1   | 4.3   | 3.8   | 4.0   | 4.2   | 3.6   | 4.1   | 4.1   | 3.9   |
| Gemin6  | 7.8   | 7.5   | 6.2   | 6.9   | 8.1   | 5.5   | 7.3   | 4.9   | 6.6   | 5.6   | 7.2   | 5.1   |
| Gemin7  | 42.8  | 37.5  | 29.7  | 33.1  | 36.6  | 39.9  | 33.7  | 34.8  | 38.2  | 38.2  | 37.2  | 32.5  |
| Gemin8  | 1.9   | 2.8   | 3.0   | 1.7   | 2.5   | 1.9   | 2.1   | 2.4   | 1.8   | 1.9   | 2.1   | 2.0   |
| Gen1    | 0.5   | 1.2   | 1.7   | 0.3   | 1.3   | 0.4   | 1.8   | 1.0   | 1.2   | 0.8   | 1.3   | 1.0   |
| Get4    | 13.0  | 13.1  | 11.0  | 11.2  | 12.7  | 14.2  | 13.3  | 13.0  | 14.3  | 15.9  | 14.0  | 13.7  |
| Gfap    | 0.0   | 0.0   | 0.0   | 0.0   | 0.0   | 0.0   | 0.0   | 0.0   | 0.0   | 0.1   | 0.0   | 0.1   |
| Gfer    | 10.7  | 9.5   | 11.3  | 9.2   | 9.1   | 10.4  | 10.8  | 9.6   | 9.7   | 12.7  | 11.3  | 11.3  |
| Gfi1    | 0.0   | 0.0   | 0.0   | 0.0   | 0.0   | 0.0   | 0.0   | 0.0   | 0.0   | 0.0   | 0.0   | 0.0   |
| Gfm1    | 13.6  | 13.0  | 12.7  | 13.7  | 13.3  | 13.4  | 14.1  | 14.1  | 12.1  | 12.5  | 14.6  | 12.6  |
| Gfm2    | 7.3   | 7.8   | 7.2   | 6.3   | 7.1   | 6.2   | 5.9   | 7.3   | 6.3   | 6.5   | 7.3   | 6.7   |
| Gfod1   | 0.7   | 0.8   | 1.1   | 0.6   | 0.6   | 0.5   | 1.2   | 1.3   | 1.8   | 2.1   | 1.6   | 1.6   |
| Gfod2   | 2.2   | 2.7   | 2.2   | 2.9   | 2.5   | 2.4   | 2.5   | 2.4   | 2.6   | 3.7   | 2.9   | 2.5   |
| Gfpt1   | 14.6  | 17.2  | 16.5  | 15.5  | 16.8  | 15.6  | 17.5  | 17.7  | 17.9  | 20.4  | 21.1  | 21.1  |
| Gfpt2   | 49.4  | 108.3 | 145.0 | 28.9  | 86.1  | 23.7  | 129.1 | 150.2 | 103.6 | 53.9  | 83.3  | 92.9  |
| Gfra1   | 0.5   | 0.9   | 3.9   | 0.1   | 0.6   | 0.2   | 0.4   | 8.8   | 1.3   | 0.7   | 0.7   | 1.0   |
| Gfra2   | 0.7   | 0.7   | 0.9   | 0.4   | 0.8   | 0.6   | 0.4   | 0.7   | 0.2   | 0.2   | 0.4   | 0.3   |
| Gfra4   | 0.9   | 0.9   | 0.6   | 1.2   | 0.5   | 1.1   | 1.1   | 0.6   | 1.0   | 1.4   | 1.0   | 1.0   |

Online Table 1



|        |       |       |       |       |       |       |       |      |       |      |       |       |
|--------|-------|-------|-------|-------|-------|-------|-------|------|-------|------|-------|-------|
| Gga1   | 8.5   | 9.4   | 7.6   | 8.0   | 8.7   | 8.9   | 10.1  | 7.7  | 9.9   | 8.1  | 7.1   | 7.6   |
| Gga2   | 10.4  | 10.6  | 8.6   | 10.0  | 10.7  | 12.3  | 8.6   | 10.4 | 10.1  | 9.8  | 9.8   | 10.0  |
| Gga3   | 2.0   | 2.1   | 2.1   | 2.4   | 2.9   | 2.2   | 2.7   | 1.8  | 2.7   | 1.6  | 2.1   | 1.5   |
| Ggact  | 10.9  | 9.8   | 10.0  | 11.6  | 12.3  | 10.4  | 10.0  | 10.8 | 8.9   | 13.1 | 10.3  | 11.1  |
| Ggct   | 13.7  | 12.0  | 13.2  | 10.7  | 9.7   | 8.3   | 12.3  | 14.1 | 11.1  | 16.7 | 16.1  | 15.9  |
| Ggcx   | 31.8  | 32.9  | 32.9  | 30.2  | 31.1  | 34.7  | 27.8  | 35.4 | 28.4  | 29.6 | 28.0  | 27.9  |
| Ggh    | 31.3  | 27.5  | 27.1  | 34.5  | 30.8  | 37.4  | 27.5  | 27.3 | 31.2  | 28.2 | 28.7  | 34.3  |
| Ggn    | 0.7   | 0.7   | 0.9   | 0.3   | 0.6   | 0.6   | 0.8   | 0.7  | 0.8   | 0.5  | 0.5   | 0.6   |
| Ggnbp1 | 0.7   | 0.7   | 0.7   | 0.7   | 0.6   | 0.7   | 0.7   | 0.5  | 0.6   | 0.8  | 0.3   | 0.7   |
| Ggnbp2 | 26.4  | 27.9  | 27.7  | 25.7  | 25.9  | 26.0  | 26.5  | 27.9 | 27.0  | 26.1 | 31.2  | 29.0  |
| Ggps1  | 29.3  | 25.8  | 23.4  | 30.6  | 23.6  | 28.6  | 21.5  | 21.0 | 21.6  | 26.3 | 26.3  | 26.9  |
| Ggt1   | 2.4   | 1.1   | 0.7   | 6.0   | 1.9   | 5.2   | 0.2   | 0.3  | 0.0   | 0.1  | 0.2   | 0.1   |
| Ggt5   | 1.5   | 1.9   | 2.8   | 2.5   | 2.9   | 2.3   | 1.5   | 2.5  | 2.5   | 1.2  | 0.9   | 1.3   |
| Ggt6   | 0.1   | 0.0   | 0.1   | 0.1   | 0.0   | 0.1   | 0.0   | 0.1  | 0.1   | 0.0  | 0.0   | 0.0   |
| Ggt7   | 3.7   | 5.4   | 5.1   | 4.4   | 4.9   | 4.5   | 6.1   | 7.3  | 6.3   | 3.9  | 4.3   | 3.5   |
| Ggta1  | 30.8  | 30.5  | 33.7  | 30.7  | 33.8  | 32.6  | 30.2  | 26.4 | 29.4  | 30.7 | 33.3  | 33.0  |
| Ghdc   | 9.7   | 8.3   | 6.1   | 9.3   | 7.8   | 9.2   | 7.9   | 6.2  | 8.1   | 7.8  | 7.6   | 6.8   |
| Ghitm  | 102.2 | 71.8  | 56.9  | 110.0 | 71.2  | 103.9 | 60.1  | 75.0 | 65.8  | 72.8 | 78.6  | 70.2  |
| Ghr    | 199.7 | 160.2 | 121.8 | 192.9 | 138.5 | 210.8 | 124.6 | 92.8 | 118.6 | 78.1 | 111.1 | 128.2 |
| Ghrl   | 0.1   | 0.0   | 0.0   | 0.0   | 0.1   | 0.5   | 0.2   | 0.1  | 0.1   | 0.2  | 0.0   | 0.2   |
| Gid4   | 9.3   | 7.0   | 6.6   | 9.7   | 6.4   | 10.7  | 6.0   | 6.0  | 5.9   | 6.5  | 7.3   | 7.1   |
| Gid8   | 11.7  | 11.9  | 13.0  | 11.7  | 9.3   | 11.3  | 11.9  | 12.3 | 10.0  | 11.0 | 12.1  | 12.1  |
| Gigyf1 | 1.4   | 1.5   | 1.9   | 1.4   | 1.6   | 1.8   | 1.7   | 1.6  | 1.6   | 1.4  | 1.3   | 1.2   |
| Gigyf2 | 10.4  | 10.1  | 11.7  | 11.0  | 10.2  | 10.8  | 11.4  | 10.9 | 9.5   | 9.9  | 11.8  | 12.8  |
| Gimap1 | 0.5   | 0.3   | 0.4   | 0.4   | 0.5   | 0.4   | 0.5   | 0.9  | 0.4   | 0.6  | 0.5   | 0.5   |
| Gimap4 | 0.1   | 0.1   | 0.1   | 0.1   | 0.1   | 0.0   | 0.3   | 0.4  | 0.4   | 0.0  | 0.0   | 0.1   |
| Gimap5 | 0.1   | 0.0   | 0.0   | 0.0   | 0.0   | 0.0   | 0.0   | 0.0  | 0.0   | 0.0  | 0.0   | 0.0   |
| Gimap6 | 1.9   | 1.2   | 1.6   | 2.3   | 1.3   | 0.9   | 1.7   | 1.9  | 1.3   | 0.5  | 0.8   | 0.6   |
| Gimap8 | 0.1   | 0.1   | 0.1   | 0.0   | 0.0   | 0.0   | 0.1   | 0.2  | 0.1   | 0.0  | 0.0   | 0.0   |
| Gimap9 | 2.9   | 2.5   | 2.8   | 1.6   | 2.2   | 2.7   | 1.9   | 2.2  | 1.6   | 2.2  | 2.8   | 2.9   |
| Gin1   | 1.6   | 1.9   | 1.9   | 2.2   | 1.6   | 2.2   | 1.8   | 2.3  | 1.3   | 1.5  | 2.4   | 1.7   |
| Ginm1  | 49.2  | 44.6  | 46.3  | 49.9  | 42.7  | 51.7  | 46.3  | 43.1 | 44.3  | 42.6 | 46.5  | 53.7  |
| Gins1  | 0.9   | 1.6   | 1.2   | 1.2   | 2.1   | 0.6   | 2.4   | 1.3  | 1.9   | 1.2  | 1.3   | 0.9   |
| Gins2  | 7.0   | 9.0   | 9.9   | 5.1   | 9.6   | 5.4   | 12.4  | 7.9  | 8.8   | 6.4  | 9.0   | 6.4   |
| Gins3  | 1.7   | 1.7   | 2.6   | 2.1   | 2.4   | 1.7   | 3.1   | 1.9  | 2.0   | 1.6  | 2.3   | 2.2   |
| Gins4  | 14.4  | 17.4  | 23.6  | 17.0  | 16.7  | 14.8  | 19.5  | 25.1 | 22.2  | 19.4 | 21.0  | 20.6  |
| Gipc1  | 30.4  | 27.3  | 23.7  | 32.2  | 29.8  | 31.4  | 31.1  | 26.1 | 30.1  | 28.2 | 29.4  | 25.6  |
| Gipc2  | 0.3   | 0.1   | 0.1   | 0.0   | 0.2   | 0.2   | 0.1   | 0.0  | 0.0   | 0.2  | 0.2   | 0.0   |
| Gipr   | 0.0   | 0.0   | 0.1   | 0.0   | 0.1   | 0.0   | 0.0   | 0.0  | 0.0   | 0.0  | 0.0   | 0.0   |
| Git1   | 7.2   | 7.4   | 6.7   | 7.4   | 7.0   | 9.0   | 7.2   | 6.7  | 7.0   | 6.4  | 6.7   | 5.5   |
| Git2   | 5.3   | 5.6   | 6.1   | 5.0   | 6.2   | 5.7   | 6.7   | 6.2  | 5.4   | 5.5  | 6.2   | 5.4   |
| Gja1   | 8.1   | 6.6   | 8.6   | 4.3   | 8.5   | 4.7   | 9.1   | 7.9  | 6.0   | 17.6 | 11.9  | 8.1   |
| Gja3   | 0.3   | 0.2   | 0.2   | 0.3   | 0.1   | 0.5   | 0.1   | 0.1  | 0.0   | 0.0  | 0.1   | 0.1   |
| Gja4   | 0.4   | 1.0   | 1.6   | 0.2   | 0.4   | 0.4   | 0.6   | 1.6  | 0.4   | 0.8  | 0.3   | 1.1   |
| Gja5   | 0.0   | 0.0   | 0.1   | 0.0   | 0.1   | 0.1   | 0.0   | 0.2  | 0.0   | 0.0  | 0.0   | 0.1   |
| Gja6   | 0.0   | 0.0   | 0.0   | 0.0   | 0.0   | 0.0   | 0.1   | 0.0  | 0.0   | 0.0  | 0.1   | 0.1   |
| Gja8   | 0.0   | 0.0   | 0.0   | 0.0   | 0.0   | 0.0   | 0.0   | 0.0  | 0.0   | 0.0  | 0.0   | 0.0   |
| Gjb3   | 3.4   | 3.4   | 3.5   | 0.5   | 2.5   | 1.8   | 5.0   | 5.2  | 2.2   | 6.9  | 6.8   | 5.2   |
| Gjb4   | 1.9   | 2.8   | 3.0   | 1.4   | 1.9   | 1.4   | 3.2   | 4.7  | 2.1   | 3.7  | 4.2   | 3.1   |
| Gjb5   | 9.0   | 5.6   | 6.8   | 3.7   | 6.5   | 2.9   | 7.7   | 6.8  | 4.8   | 12.5 | 10.7  | 10.6  |
| Gjc1   | 3.3   | 3.2   | 4.2   | 2.9   | 3.8   | 3.4   | 5.2   | 4.6  | 4.0   | 3.2  | 4.1   | 3.4   |
| Gjc2   | 1.7   | 1.8   | 1.1   | 1.3   | 1.4   | 1.8   | 1.6   | 1.2  | 1.6   | 1.5  | 1.0   | 1.2   |
| Gjc3   | 0.0   | 0.1   | 0.1   | 0.0   | 0.1   | 0.0   | 0.1   | 0.1  | 0.1   | 0.0  | 0.1   | 0.1   |
| Gk5    | 2.1   | 3.7   | 4.0   | 1.7   | 2.8   | 1.8   | 2.5   | 2.3  | 2.0   | 1.8  | 1.9   | 2.3   |
| Gkap1  | 22.8  | 23.6  | 25.2  | 24.1  | 16.3  | 26.9  | 20.2  | 18.7 | 17.3  | 19.0 | 21.5  | 25.5  |
| Gla    | 11.1  | 8.0   | 6.4   | 15.8  | 12.9  | 9.7   | 6.8   | 6.8  | 6.1   | 9.6  | 7.7   | 9.2   |
| Glb1   | 40.7  | 32.4  | 34.1  | 38.0  | 37.4  | 39.6  | 31.4  | 34.9 | 31.2  | 36.4 | 32.5  | 33.0  |

Online Table 1

|          |       |       |       |       |       |       |       |       |       |       |       |       |
|----------|-------|-------|-------|-------|-------|-------|-------|-------|-------|-------|-------|-------|
| Glb11    | 6.3   | 6.0   | 6.5   | 6.8   | 6.1   | 6.5   | 6.2   | 6.6   | 7.1   | 5.9   | 6.0   | 7.3   |
| Glb112   | 0.1   | 0.1   | 0.2   | 0.1   | 0.0   | 0.1   | 0.1   | 0.1   | 0.1   | 0.1   | 0.0   | 0.1   |
| Glcci1   | 1.0   | 1.5   | 2.1   | 0.8   | 1.2   | 0.8   | 1.3   | 1.7   | 1.2   | 0.8   | 0.9   | 0.9   |
| Glce     | 10.0  | 8.4   | 8.6   | 10.6  | 8.1   | 10.8  | 9.7   | 11.6  | 10.5  | 8.7   | 10.5  | 8.9   |
| Gldc     | 6.4   | 6.3   | 4.9   | 6.9   | 3.6   | 4.2   | 2.6   | 4.0   | 2.9   | 2.0   | 1.9   | 1.7   |
| Gldn     | 0.1   | 0.0   | 0.0   | 0.3   | 0.0   | 0.1   | 0.0   | 0.0   | 0.0   | 0.0   | 0.0   | 0.1   |
| Gle1     | 12.7  | 11.2  | 11.1  | 14.5  | 12.5  | 11.4  | 12.7  | 11.0  | 10.4  | 11.4  | 12.0  | 11.3  |
| Glg1     | 43.4  | 43.7  | 42.6  | 41.7  | 47.6  | 46.9  | 44.2  | 46.2  | 44.5  | 41.1  | 40.1  | 38.8  |
| Gli1     | 0.0   | 0.0   | 0.0   | 0.0   | 0.0   | 0.0   | 0.0   | 0.1   | 0.1   | 0.0   | 0.0   | 0.0   |
| Gli2     | 0.1   | 0.1   | 0.3   | 0.0   | 0.1   | 0.0   | 0.1   | 0.1   | 0.1   | 0.2   | 0.1   | 0.1   |
| Gli3     | 3.0   | 3.7   | 4.3   | 2.9   | 3.0   | 3.4   | 4.2   | 3.6   | 3.2   | 3.2   | 3.0   | 3.4   |
| Glpr1    | 36.6  | 18.5  | 12.2  | 73.2  | 108.6 | 20.5  | 38.6  | 13.4  | 18.7  | 56.7  | 59.5  | 49.7  |
| Glpr2    | 21.7  | 24.0  | 33.0  | 19.7  | 32.7  | 21.7  | 31.0  | 43.4  | 35.6  | 30.1  | 36.4  | 27.9  |
| Glis1    | 0.1   | 0.2   | 0.2   | 0.0   | 0.0   | 0.1   | 0.2   | 0.2   | 0.2   | 0.1   | 0.2   | 0.1   |
| Glis2    | 4.6   | 4.2   | 4.5   | 3.2   | 4.0   | 4.2   | 5.2   | 8.4   | 5.7   | 4.2   | 5.8   | 3.5   |
| Glis3    | 2.9   | 5.1   | 4.8   | 2.9   | 3.2   | 3.3   | 4.4   | 4.3   | 3.9   | 3.0   | 4.0   | 3.7   |
| Glmn     | 3.3   | 3.5   | 3.7   | 3.8   | 3.3   | 3.6   | 3.2   | 4.0   | 3.9   | 3.7   | 3.5   | 3.9   |
| Glo1     | 70.6  | 56.1  | 48.9  | 72.4  | 51.1  | 71.9  | 57.0  | 49.4  | 49.0  | 64.0  | 64.9  | 64.6  |
| Glod4    | 32.5  | 30.8  | 28.4  | 26.7  | 27.0  | 31.7  | 22.8  | 23.4  | 23.7  | 29.5  | 26.7  | 28.7  |
| Glp1r    | 0.0   | 0.0   | 0.0   | 0.0   | 0.1   | 0.1   | 0.1   | 0.0   | 0.0   | 0.1   | 0.0   | 0.0   |
| Glp2r    | 0.3   | 0.3   | 0.2   | 0.8   | 0.2   | 0.6   | 0.0   | 0.1   | 0.0   | 0.0   | 0.0   | 0.0   |
| Glr1     | 0.0   | 0.1   | 0.0   | 0.1   | 0.0   | 0.1   | 0.1   | 0.0   | 0.0   | 0.0   | 0.0   | 0.0   |
| Glr3     | 0.0   | 0.0   | 0.0   | 0.0   | 0.0   | 0.0   | 0.0   | 0.0   | 0.0   | 0.0   | 0.0   | 0.0   |
| Glrb     | 0.3   | 0.2   | 0.3   | 0.2   | 0.1   | 0.6   | 0.1   | 0.2   | 0.0   | 0.2   | 0.4   | 0.3   |
| Glrx     | 11.6  | 11.1  | 12.6  | 24.4  | 42.1  | 11.1  | 15.6  | 8.6   | 9.5   | 14.6  | 8.8   | 13.2  |
| Glrx2    | 3.9   | 3.7   | 3.8   | 3.4   | 3.2   | 3.1   | 3.5   | 3.9   | 3.3   | 4.2   | 4.7   | 4.3   |
| Glrx3    | 90.8  | 69.3  | 41.5  | 62.7  | 52.8  | 62.6  | 39.1  | 41.1  | 48.8  | 67.5  | 53.9  | 51.3  |
| Glrx5    | 36.4  | 30.2  | 21.1  | 31.3  | 29.8  | 31.7  | 24.3  | 24.4  | 29.7  | 35.0  | 24.4  | 25.0  |
| Gls      | 38.1  | 37.5  | 29.3  | 39.5  | 38.3  | 32.7  | 39.3  | 32.9  | 44.9  | 40.6  | 48.8  | 43.5  |
| Gls2     | 0.1   | 0.1   | 0.1   | 0.2   | 0.3   | 0.2   | 0.3   | 0.3   | 0.2   | 0.2   | 0.1   | 0.1   |
| Glt25d1  | 59.1  | 49.2  | 48.2  | 73.3  | 63.2  | 68.2  | 58.5  | 59.3  | 57.9  | 47.6  | 52.6  | 51.8  |
| Glt25d2  | 0.1   | 0.2   | 0.2   | 0.2   | 0.1   | 0.2   | 0.1   | 0.4   | 0.2   | 0.2   | 0.1   | 0.1   |
| Glt28d2  | 1.1   | 0.8   | 0.9   | 0.8   | 0.9   | 1.1   | 1.0   | 1.1   | 1.0   | 1.3   | 1.0   | 1.0   |
| Glt8d1   | 24.4  | 25.0  | 21.6  | 15.6  | 19.5  | 19.7  | 18.4  | 20.0  | 24.9  | 22.1  | 21.6  | 22.1  |
| Glt8d2   | 12.5  | 9.9   | 8.8   | 11.2  | 10.0  | 11.7  | 7.4   | 4.2   | 6.5   | 4.4   | 6.2   | 5.8   |
| Gltp     | 13.9  | 13.5  | 13.3  | 17.4  | 22.0  | 14.1  | 15.0  | 14.7  | 13.1  | 11.3  | 15.7  | 10.4  |
| Gltpd1   | 5.8   | 5.7   | 4.5   | 6.0   | 5.8   | 5.3   | 6.2   | 4.5   | 5.4   | 5.3   | 6.0   | 3.8   |
| Gltpd2   | 0.7   | 0.4   | 0.3   | 0.4   | 0.2   | 0.6   | 0.7   | 0.8   | 0.4   | 0.3   | 0.3   | 0.6   |
| Gltscr1  | 0.2   | 0.3   | 0.3   | 0.3   | 0.3   | 0.4   | 0.4   | 0.4   | 0.5   | 0.3   | 0.2   | 0.2   |
| Gltscr1l | 1.7   | 2.5   | 2.9   | 2.0   | 2.2   | 2.4   | 2.2   | 2.3   | 2.2   | 1.7   | 2.0   | 2.0   |
| Gltscr2  | 52.2  | 46.3  | 54.8  | 37.1  | 43.5  | 43.4  | 48.2  | 57.2  | 51.1  | 50.7  | 56.7  | 56.1  |
| Glud1    | 77.7  | 65.7  | 50.5  | 73.4  | 67.1  | 70.4  | 65.1  | 59.7  | 61.1  | 66.9  | 72.7  | 62.5  |
| Glul     | 15.3  | 30.9  | 57.6  | 17.7  | 28.8  | 16.9  | 28.7  | 44.2  | 24.8  | 39.7  | 28.3  | 35.2  |
| Glyat    | 0.2   | 0.0   | 0.0   | 0.0   | 0.1   | 0.1   | 0.0   | 0.0   | 0.0   | 0.0   | 0.0   | 0.0   |
| Glyctk   | 0.3   | 0.3   | 0.2   | 0.6   | 0.4   | 0.4   | 0.4   | 0.3   | 0.4   | 0.2   | 0.4   | 0.3   |
| Glyr1    | 30.2  | 33.9  | 32.8  | 33.2  | 31.6  | 31.9  | 31.5  | 31.7  | 30.2  | 30.2  | 32.9  | 32.1  |
| Gm10012  | 3.4   | 2.9   | 3.7   | 4.4   | 4.9   | 5.1   | 3.5   | 3.6   | 3.6   | 6.2   | 2.9   | 4.6   |
| Gm10033  | 0.6   | 1.8   | 2.2   | 1.2   | 1.2   | 1.2   | 0.9   | 1.8   | 1.2   | 1.3   | 2.3   | 1.3   |
| Gm10046  | 0.2   | 0.4   | 0.4   | 0.6   | 0.3   | 0.3   | 0.2   | 0.3   | 0.4   | 0.1   | 0.5   | 0.3   |
| Gm10052  | 40.4  | 35.2  | 47.9  | 42.7  | 48.4  | 34.7  | 61.1  | 66.2  | 56.4  | 52.8  | 60.1  | 52.5  |
| Gm10069  | 0.3   | 0.4   | 0.4   | 0.2   | 0.4   | 0.3   | 0.3   | 0.3   | 0.4   | 0.2   | 0.4   | 0.3   |
| Gm10094  | 314.4 | 221.1 | 172.7 | 294.1 | 178.5 | 259.7 | 170.7 | 115.7 | 146.4 | 266.1 | 247.9 | 194.6 |
| Gm101    | 0.0   | 0.0   | 0.0   | 0.0   | 0.0   | 0.0   | 0.0   | 0.0   | 0.0   | 0.0   | 0.0   | 0.0   |
| Gm10125  | 0.1   | 0.0   | 0.1   | 0.1   | 0.1   | 0.0   | 0.1   | 0.1   | 0.1   | 0.1   | 0.1   | 0.1   |
| Gm10190  | 0.2   | 0.1   | 0.0   | 0.1   | 0.1   | 0.1   | 0.0   | 0.1   | 0.2   | 0.1   | 0.1   | 0.1   |
| Gm10220  | 0.1   | 0.2   | 0.2   | 0.0   | 0.2   | 0.2   | 0.1   | 0.1   | 0.1   | 0.3   | 0.1   | 0.1   |
| Gm10336  | 1.3   | 1.7   | 1.9   | 1.6   | 1.7   | 1.8   | 1.4   | 1.6   | 1.5   | 1.8   | 2.0   | 1.7   |

Online Table 1

|         |     |     |     |     |     |     |     |     |     |     |     |     |
|---------|-----|-----|-----|-----|-----|-----|-----|-----|-----|-----|-----|-----|
| Gm10364 | 0.0 | 0.0 | 0.0 | 0.2 | 0.0 | 0.0 | 0.1 | 0.0 | 0.0 | 0.0 | 0.0 | 0.0 |
| Gm10389 | 0.3 | 0.5 | 0.4 | 0.3 | 0.4 | 0.3 | 0.4 | 0.3 | 0.2 | 0.4 | 0.3 | 0.3 |
| Gm10390 | 0.1 | 0.3 | 0.3 | 0.4 | 0.3 | 0.3 | 0.2 | 0.3 | 0.2 | 0.3 | 0.4 | 0.5 |
| Gm10400 | 0.0 | 0.1 | 0.1 | 0.0 | 0.1 | 0.0 | 0.1 | 0.1 | 0.0 | 0.1 | 0.1 | 0.1 |
| Gm10406 | 0.3 | 0.5 | 0.5 | 0.2 | 0.2 | 0.3 | 0.4 | 0.4 | 0.5 | 0.3 | 0.4 | 0.4 |
| Gm10408 | 0.1 | 0.1 | 0.1 | 0.1 | 0.1 | 0.1 | 0.0 | 0.1 | 0.1 | 0.0 | 0.1 | 0.0 |
| Gm10409 | 0.2 | 0.3 | 0.3 | 0.2 | 0.3 | 0.5 | 0.3 | 0.3 | 0.4 | 0.3 | 0.2 | 0.2 |
| Gm10413 | 0.0 | 0.0 | 0.0 | 0.0 | 0.0 | 0.0 | 0.0 | 0.0 | 0.0 | 0.0 | 0.0 | 0.0 |
| Gm10416 | 0.4 | 0.8 | 0.5 | 0.1 | 0.0 | 0.6 | 0.4 | 0.3 | 0.4 | 0.5 | 0.5 | 0.4 |
| Gm10432 | 0.0 | 0.0 | 0.0 | 0.0 | 0.0 | 0.0 | 0.0 | 0.0 | 0.0 | 0.0 | 0.0 | 0.0 |
| Gm10433 | 0.0 | 0.1 | 0.0 | 0.0 | 0.0 | 0.0 | 0.1 | 0.0 | 0.1 | 0.0 | 0.0 | 0.0 |
| Gm1045  | 0.0 | 0.1 | 0.0 | 0.0 | 0.0 | 0.1 | 0.0 | 0.0 | 0.1 | 0.1 | 0.2 | 0.0 |
| Gm10451 | 2.8 | 1.7 | 1.4 | 2.0 | 1.7 | 1.8 | 0.8 | 1.3 | 1.1 | 0.9 | 1.8 | 1.2 |
| Gm10471 | 0.3 | 0.3 | 0.4 | 0.2 | 0.3 | 0.2 | 0.1 | 0.1 | 0.1 | 0.4 | 0.3 | 0.1 |
| Gm10474 | 0.0 | 0.1 | 0.0 | 0.1 | 0.0 | 0.0 | 0.0 | 0.0 | 0.0 | 0.0 | 0.0 | 0.0 |
| Gm10485 | 0.1 | 0.0 | 0.0 | 0.1 | 0.0 | 0.0 | 0.0 | 0.1 | 0.1 | 0.0 | 0.1 | 0.1 |
| Gm10509 | 1.9 | 2.8 | 2.3 | 2.0 | 2.3 | 3.1 | 1.7 | 2.8 | 2.3 | 2.8 | 2.8 | 2.8 |
| Gm10510 | 0.0 | 0.0 | 0.0 | 0.0 | 0.0 | 0.0 | 0.0 | 0.0 | 0.0 | 0.0 | 0.0 | 0.0 |
| Gm10512 | 0.0 | 0.0 | 0.0 | 0.0 | 0.0 | 0.0 | 0.0 | 0.0 | 0.0 | 0.1 | 0.1 | 0.0 |
| Gm10516 | 1.4 | 1.1 | 1.7 | 2.0 | 0.9 | 1.8 | 0.9 | 1.3 | 1.2 | 1.2 | 1.3 | 1.5 |
| Gm10532 | 0.8 | 1.2 | 1.3 | 1.0 | 0.9 | 1.2 | 1.8 | 1.4 | 1.3 | 1.1 | 1.2 | 1.1 |
| Gm10536 | 0.0 | 0.0 | 0.1 | 0.0 | 0.1 | 0.1 | 0.0 | 0.0 | 0.0 | 0.0 | 0.0 | 0.1 |
| Gm10538 | 0.0 | 0.1 | 0.0 | 0.0 | 0.0 | 0.0 | 0.0 | 0.0 | 0.0 | 0.0 | 0.0 | 0.0 |
| Gm10548 | 0.2 | 0.1 | 0.2 | 0.2 | 0.1 | 0.1 | 0.2 | 0.1 | 0.1 | 0.1 | 0.1 | 0.2 |
| Gm10560 | 0.3 | 0.7 | 0.8 | 0.3 | 0.5 | 0.8 | 0.5 | 0.7 | 0.4 | 0.5 | 0.2 | 0.3 |
| Gm10578 | 0.1 | 0.1 | 0.1 | 0.1 | 0.0 | 0.0 | 0.1 | 0.1 | 0.0 | 0.0 | 0.0 | 0.0 |
| Gm10584 | 0.0 | 0.0 | 0.0 | 0.0 | 0.0 | 0.0 | 0.0 | 0.0 | 0.1 | 0.1 | 0.1 | 0.1 |
| Gm10635 | 0.0 | 0.0 | 0.0 | 0.0 | 0.0 | 0.0 | 0.0 | 0.0 | 0.0 | 0.0 | 0.0 | 0.0 |
| Gm10636 | 0.0 | 0.0 | 0.0 | 0.0 | 0.0 | 0.0 | 0.0 | 0.0 | 0.0 | 0.0 | 0.0 | 0.0 |
| Gm10638 | 1.3 | 0.8 | 0.9 | 0.5 | 0.9 | 0.8 | 0.9 | 0.9 | 1.5 | 1.0 | 0.8 | 1.2 |
| Gm10639 | 0.4 | 0.2 | 0.0 | 0.3 | 0.2 | 0.4 | 0.0 | 0.1 | 0.0 | 0.0 | 0.0 | 0.1 |
| Gm10640 | 0.1 | 0.1 | 0.1 | 0.4 | 0.1 | 0.1 | 0.1 | 0.1 | 0.1 | 0.0 | 0.1 | 0.1 |
| Gm10653 | 2.1 | 1.9 | 2.0 | 2.1 | 1.8 | 2.0 | 2.0 | 2.2 | 1.7 | 1.8 | 2.0 | 2.1 |
| Gm10658 | 0.1 | 0.3 | 0.2 | 0.2 | 0.0 | 0.2 | 0.2 | 0.1 | 0.2 | 0.1 | 0.3 | 0.2 |
| Gm10677 | 0.0 | 0.0 | 0.0 | 0.2 | 0.1 | 0.0 | 0.0 | 0.0 | 0.0 | 0.0 | 0.0 | 0.0 |
| Gm10681 | 0.1 | 0.0 | 0.0 | 0.1 | 0.0 | 0.0 | 0.0 | 0.0 | 0.0 | 0.0 | 0.0 | 0.0 |
| Gm10684 | 0.1 | 0.1 | 0.0 | 0.0 | 0.0 | 0.1 | 0.0 | 0.0 | 0.0 | 0.1 | 0.0 | 0.0 |
| Gm10731 | 0.0 | 0.0 | 0.0 | 0.0 | 0.0 | 0.0 | 0.0 | 0.0 | 0.0 | 0.0 | 0.1 | 0.0 |
| Gm10754 | 0.0 | 0.0 | 0.1 | 0.0 | 0.0 | 0.0 | 0.0 | 0.0 | 0.0 | 0.0 | 0.0 | 0.0 |
| Gm10767 | 0.9 | 1.0 | 1.2 | 1.5 | 0.8 | 1.0 | 0.6 | 0.8 | 0.6 | 0.7 | 0.8 | 1.5 |
| Gm10768 | 0.0 | 0.0 | 0.0 | 0.0 | 0.0 | 0.0 | 0.0 | 0.0 | 0.0 | 0.0 | 0.0 | 0.0 |
| Gm10778 | 0.3 | 0.5 | 0.4 | 0.4 | 0.4 | 0.4 | 0.3 | 0.4 | 0.4 | 0.4 | 0.3 | 0.5 |
| Gm1078  | 0.2 | 0.2 | 0.1 | 0.0 | 0.1 | 0.1 | 0.0 | 0.1 | 0.1 | 0.1 | 0.1 | 0.1 |
| Gm10785 | 0.4 | 0.6 | 0.8 | 1.0 | 0.4 | 0.7 | 0.5 | 0.6 | 0.4 | 0.5 | 0.6 | 0.5 |
| Gm10790 | 0.1 | 0.1 | 0.3 | 0.0 | 0.2 | 0.2 | 0.0 | 0.1 | 0.1 | 0.0 | 0.1 | 0.1 |
| Gm10791 | 0.1 | 0.2 | 0.2 | 0.2 | 0.3 | 0.2 | 0.4 | 0.3 | 0.2 | 0.3 | 0.4 | 0.1 |
| Gm10804 | 0.1 | 0.2 | 0.0 | 0.3 | 0.2 | 0.1 | 0.0 | 0.2 | 0.0 | 0.2 | 0.2 | 0.0 |
| Gm10814 | 0.3 | 0.3 | 0.4 | 0.2 | 0.3 | 0.4 | 0.2 | 0.1 | 0.3 | 0.2 | 0.2 | 0.3 |
| Gm10818 | 0.1 | 0.1 | 0.1 | 0.4 | 0.2 | 0.0 | 0.1 | 0.3 | 0.1 | 0.0 | 0.2 | 0.2 |
| Gm10825 | 0.2 | 0.2 | 0.2 | 0.1 | 0.1 | 0.3 | 0.1 | 0.1 | 0.1 | 0.1 | 0.1 | 0.1 |
| Gm10845 | 5.1 | 5.9 | 5.9 | 7.1 | 5.3 | 5.5 | 5.9 | 5.2 | 4.1 | 3.8 | 5.3 | 6.2 |
| Gm10865 | 0.3 | 0.9 | 0.1 | 1.1 | 0.2 | 0.5 | 0.2 | 0.3 | 0.6 | 0.2 | 0.3 | 0.5 |
| Gm10872 | 0.0 | 0.1 | 0.0 | 0.0 | 0.0 | 0.0 | 0.0 | 0.0 | 0.0 | 0.0 | 0.0 | 0.0 |
| Gm10941 | 0.2 | 0.2 | 0.6 | 0.9 | 0.3 | 0.5 | 0.2 | 0.7 | 0.3 | 0.1 | 0.0 | 0.4 |
| Gm11110 | 1.1 | 1.6 | 0.9 | 1.0 | 1.3 | 1.7 | 0.8 | 0.7 | 0.9 | 0.6 | 0.8 | 0.9 |
| Gm11127 | 3.9 | 3.1 | 2.7 | 4.2 | 3.7 | 3.1 | 1.9 | 2.1 | 2.1 | 1.9 | 1.5 | 1.8 |
| Gm11128 | 0.0 | 0.0 | 0.1 | 0.0 | 0.0 | 0.0 | 0.0 | 0.0 | 0.0 | 0.0 | 0.0 | 0.0 |

Online Table 1

|         |       |       |       |       |       |       |       |       |       |       |       |       |
|---------|-------|-------|-------|-------|-------|-------|-------|-------|-------|-------|-------|-------|
| Gm11149 | 0.6   | 0.2   | 0.3   | 0.3   | 0.3   | 0.2   | 0.7   | 0.1   | 0.8   | 0.9   | 1.0   | 1.0   |
| Gm11166 | 0.0   | 0.0   | 0.0   | 0.0   | 0.0   | 0.0   | 0.0   | 0.0   | 0.0   | 0.0   | 0.0   | 0.0   |
| Gm11201 | 0.2   | 0.3   | 0.4   | 0.3   | 0.4   | 0.3   | 0.4   | 0.3   | 0.1   | 0.3   | 0.2   | 0.3   |
| Gm11202 | 0.0   | 0.0   | 0.0   | 0.0   | 0.0   | 0.0   | 0.0   | 0.0   | 0.1   | 0.0   | 0.0   | 0.0   |
| Gm1123  | 0.0   | 0.0   | 0.0   | 0.0   | 0.1   | 0.0   | 0.0   | 0.0   | 0.0   | 0.1   | 0.0   | 0.0   |
| Gm11346 | 0.0   | 0.0   | 0.0   | 0.0   | 0.0   | 0.2   | 0.0   | 0.0   | 0.0   | 0.0   | 0.0   | 0.0   |
| Gm11351 | 4.5   | 1.0   | 0.3   | 0.9   | 0.6   | 0.6   | 0.2   | 0.7   | 0.2   | 0.9   | 0.4   | 0.4   |
| Gm1141  | 0.0   | 0.0   | 0.0   | 0.1   | 0.1   | 0.0   | 0.0   | 0.0   | 0.0   | 0.1   | 0.1   | 0.1   |
| Gm11413 | 0.5   | 0.1   | 0.4   | 0.3   | 0.5   | 0.1   | 0.5   | 0.3   | 0.1   | 0.1   | 0.3   | 0.3   |
| Gm11435 | 0.0   | 0.0   | 0.0   | 0.1   | 0.0   | 0.2   | 0.0   | 0.0   | 0.0   | 0.0   | 0.0   | 0.0   |
| Gm11517 | 0.3   | 0.9   | 0.7   | 0.3   | 0.5   | 0.8   | 1.4   | 0.8   | 0.6   | 0.7   | 0.5   | 0.7   |
| Gm11545 | 0.0   | 0.0   | 0.0   | 0.1   | 0.5   | 0.0   | 0.1   | 0.0   | 0.0   | 0.0   | 0.0   | 0.0   |
| Gm11602 | 0.5   | 0.8   | 0.5   | 0.4   | 0.5   | 0.3   | 0.4   | 0.4   | 0.4   | 0.3   | 0.6   | 0.4   |
| Gm11627 | 2.9   | 2.8   | 2.6   | 2.0   | 2.0   | 1.5   | 1.5   | 2.4   | 2.4   | 1.4   | 2.7   | 2.9   |
| Gm11648 | 0.0   | 0.0   | 0.1   | 0.0   | 0.1   | 0.0   | 0.1   | 0.0   | 0.0   | 0.1   | 0.0   | 0.0   |
| Gm11696 | 0.1   | 0.2   | 0.2   | 0.2   | 0.3   | 0.2   | 0.1   | 0.2   | 0.1   | 0.1   | 0.2   | 0.1   |
| Gm11711 | 0.0   | 0.0   | 0.0   | 0.4   | 0.4   | 0.0   | 0.1   | 0.0   | 0.0   | 0.0   | 0.0   | 0.0   |
| Gm11744 | 1.8   | 2.7   | 1.4   | 1.7   | 2.0   | 2.2   | 1.7   | 2.2   | 2.2   | 1.4   | 1.1   | 1.8   |
| Gm11747 | 0.4   | 0.4   | 0.7   | 0.2   | 0.6   | 0.1   | 0.3   | 1.2   | 0.7   | 1.2   | 0.4   | 1.0   |
| Gm11837 | 0.2   | 0.2   | 0.5   | 0.1   | 0.1   | 0.1   | 0.1   | 0.3   | 0.3   | 0.1   | 0.0   | 0.1   |
| Gm11944 | 0.0   | 0.1   | 0.0   | 0.1   | 0.0   | 0.0   | 0.2   | 0.2   | 0.1   | 0.1   | 0.3   | 0.2   |
| Gm11974 | 11.7  | 10.3  | 7.5   | 13.4  | 9.6   | 10.1  | 7.3   | 8.3   | 7.6   | 11.1  | 9.0   | 7.4   |
| Gm11992 | 0.1   | 0.1   | 0.0   | 0.2   | 0.0   | 0.0   | 0.1   | 0.0   | 0.1   | 0.0   | 0.1   | 0.0   |
| Gm12060 | 0.1   | 0.1   | 0.0   | 0.1   | 0.0   | 0.3   | 0.0   | 0.1   | 0.0   | 0.1   | 0.1   | 0.2   |
| Gm12070 | 38.0  | 33.6  | 30.4  | 53.9  | 42.5  | 41.3  | 41.6  | 37.8  | 28.8  | 33.7  | 38.1  | 38.4  |
| Gm12185 | 1.1   | 1.0   | 0.6   | 1.2   | 0.9   | 0.9   | 0.8   | 0.3   | 0.5   | 0.5   | 0.6   | 0.6   |
| Gm12191 | 753.5 | 615.6 | 603.1 | 613.9 | 555.3 | 716.7 | 532.0 | 655.8 | 582.2 | 620.8 | 650.9 | 680.5 |
| Gm12216 | 0.1   | 0.1   | 0.1   | 0.1   | 0.1   | 0.0   | 0.0   | 0.0   | 0.0   | 0.1   | 0.1   | 0.2   |
| Gm12238 | 0.0   | 3.5   | 4.8   | 11.3  | 4.9   | 0.0   | 0.0   | 0.0   | 5.9   | 3.3   | 0.0   | 0.0   |
| Gm12250 | 0.4   | 0.1   | 0.2   | 0.9   | 0.3   | 0.2   | 0.1   | 0.0   | 0.1   | 0.0   | 0.1   | 0.3   |
| Gm12295 | 0.0   | 0.0   | 0.0   | 0.0   | 0.0   | 0.0   | 0.0   | 0.0   | 0.0   | 0.0   | 0.0   | 0.0   |
| Gm12359 | 0.4   | 0.8   | 0.7   | 0.7   | 0.6   | 0.8   | 0.9   | 0.9   | 0.5   | 0.4   | 0.6   | 0.6   |
| Gm12504 | 0.3   | 0.4   | 0.6   | 0.4   | 0.5   | 0.3   | 0.5   | 0.5   | 0.4   | 0.5   | 0.4   | 0.6   |
| Gm12505 | 0.8   | 1.1   | 1.2   | 1.0   | 1.2   | 0.8   | 1.7   | 0.2   | 1.2   | 3.4   | 0.6   | 2.1   |
| Gm12522 | 0.0   | 0.2   | 0.3   | 0.0   | 0.1   | 0.2   | 0.0   | 0.1   | 0.1   | 0.1   | 0.2   | 0.1   |
| Gm12530 | 0.0   | 0.1   | 0.0   | 0.0   | 0.1   | 0.1   | 0.0   | 0.0   | 0.1   | 0.0   | 0.0   | 0.0   |
| Gm12603 | 0.9   | 0.3   | 0.2   | 0.4   | 0.0   | 1.6   | 0.6   | 0.1   | 0.3   | 0.2   | 0.7   | 0.3   |
| Gm12657 | 5.6   | 5.2   | 5.3   | 4.5   | 6.5   | 5.4   | 4.2   | 6.0   | 5.9   | 7.3   | 5.5   | 6.7   |
| Gm12669 | 114.8 | 92.0  | 100.9 | 122.0 | 93.2  | 131.7 | 93.2  | 98.4  | 78.5  | 108.4 | 127.4 | 105.5 |
| Gm128   | 0.1   | 0.3   | 0.2   | 0.1   | 0.1   | 0.3   | 0.2   | 0.3   | 0.3   | 0.2   | 0.2   | 0.2   |
| Gm129   | 2.3   | 2.0   | 1.9   | 2.4   | 1.5   | 3.0   | 1.7   | 2.1   | 1.5   | 1.7   | 1.6   | 1.3   |
| Gm12942 | 5.6   | 7.0   | 5.4   | 8.2   | 5.0   | 8.8   | 5.3   | 6.5   | 5.3   | 5.8   | 6.5   | 5.4   |
| Gm13032 | 0.0   | 0.1   | 0.0   | 0.0   | 0.0   | 0.1   | 0.0   | 0.0   | 0.0   | 0.0   | 0.0   | 0.0   |
| Gm13034 | 0.2   | 0.5   | 0.3   | 0.5   | 0.4   | 0.4   | 0.6   | 0.3   | 0.4   | 0.4   | 0.3   | 0.3   |
| Gm13051 | 0.1   | 0.0   | 0.0   | 0.0   | 0.0   | 0.0   | 0.0   | 0.1   | 0.0   | 0.0   | 0.0   | 0.0   |
| Gm13139 | 9.3   | 11.9  | 14.1  | 13.1  | 14.3  | 15.5  | 9.0   | 11.1  | 10.7  | 11.2  | 16.8  | 14.6  |
| Gm13152 | 8.0   | 10.2  | 10.2  | 9.7   | 7.2   | 11.5  | 5.7   | 6.8   | 5.6   | 6.5   | 8.1   | 9.7   |
| Gm13154 | 0.2   | 0.2   | 0.2   | 0.5   | 0.4   | 0.4   | 0.2   | 0.2   | 0.2   | 0.3   | 0.3   | 0.3   |
| Gm13157 | 10.4  | 11.7  | 14.7  | 13.9  | 13.6  | 16.2  | 8.4   | 10.5  | 9.7   | 13.4  | 13.9  | 14.3  |
| Gm13212 | 6.9   | 8.9   | 10.7  | 9.3   | 10.5  | 11.7  | 5.9   | 7.8   | 6.6   | 9.9   | 10.6  | 10.6  |
| Gm13238 | 0.9   | 1.2   | 1.2   | 1.0   | 0.7   | 1.5   | 0.7   | 0.9   | 0.6   | 1.3   | 1.1   | 1.1   |
| Gm13242 | 0.2   | 0.2   | 0.1   | 0.2   | 0.1   | 0.2   | 0.1   | 0.1   | 0.1   | 0.1   | 0.1   | 0.1   |
| Gm13247 | 0.1   | 0.1   | 0.3   | 0.1   | 0.2   | 0.3   | 0.1   | 0.2   | 0.1   | 0.1   | 0.2   | 0.1   |
| Gm13251 | 3.6   | 4.8   | 4.9   | 5.2   | 4.2   | 6.4   | 3.9   | 4.6   | 3.3   | 3.6   | 5.6   | 4.6   |
| Gm13271 | 0.1   | 0.4   | 0.1   | 0.1   | 0.1   | 0.3   | 0.4   | 0.5   | 0.4   | 0.2   | 0.3   | 0.2   |
| Gm13272 | 0.1   | 0.0   | 0.2   | 0.0   | 0.2   | 0.3   | 0.2   | 0.1   | 0.3   | 0.1   | 0.4   | 0.0   |
| Gm13275 | 0.2   | 0.1   | 0.1   | 0.1   | 0.3   | 0.4   | 0.2   | 0.3   | 0.2   | 0.2   | 0.1   | 0.3   |

Online Table 1

|         |      |      |      |      |      |      |      |      |      |      |      |      |
|---------|------|------|------|------|------|------|------|------|------|------|------|------|
| Gm13276 | 0.2  | 0.1  | 0.1  | 0.1  | 0.2  | 0.2  | 0.3  | 0.2  | 0.1  | 0.2  | 0.2  | 0.2  |
| Gm13277 | 0.2  | 0.2  | 0.1  | 0.1  | 0.2  | 0.1  | 0.3  | 0.2  | 0.2  | 0.1  | 0.2  | 0.2  |
| Gm13278 | 0.1  | 0.1  | 0.1  | 0.1  | 0.2  | 0.2  | 0.2  | 0.2  | 0.2  | 0.2  | 0.2  | 0.2  |
| Gm13279 | 0.0  | 0.0  | 0.0  | 0.0  | 0.0  | 0.0  | 0.0  | 0.0  | 0.0  | 0.0  | 0.0  | 0.0  |
| Gm13283 | 0.2  | 0.2  | 0.2  | 0.0  | 0.2  | 0.4  | 0.3  | 0.2  | 0.1  | 0.5  | 0.1  | 0.3  |
| Gm13285 | 0.0  | 0.0  | 0.0  | 0.0  | 0.0  | 0.0  | 0.0  | 0.0  | 0.0  | 0.0  | 0.1  | 0.0  |
| Gm13286 | 0.0  | 0.1  | 0.1  | 0.0  | 0.1  | 0.0  | 0.0  | 0.1  | 0.0  | 0.1  | 0.0  | 0.1  |
| Gm13288 | 0.1  | 0.2  | 0.2  | 0.1  | 0.1  | 0.2  | 0.2  | 0.1  | 0.2  | 0.1  | 0.1  | 0.2  |
| Gm13289 | 0.1  | 0.0  | 0.1  | 0.1  | 0.1  | 0.1  | 0.2  | 0.1  | 0.1  | 0.1  | 0.1  | 0.0  |
| Gm13290 | 0.0  | 0.1  | 0.0  | 0.1  | 0.1  | 0.1  | 0.1  | 0.1  | 0.1  | 0.1  | 0.1  | 0.0  |
| Gm13293 | 2.1  | 1.1  | 1.2  | 1.1  | 1.1  | 0.9  | 1.5  | 2.0  | 1.3  | 1.9  | 3.1  | 1.9  |
| Gm13298 | 0.6  | 1.0  | 1.2  | 0.4  | 0.4  | 0.4  | 0.5  | 0.7  | 0.3  | 0.3  | 0.4  | 0.5  |
| Gm13305 | 4.7  | 5.5  | 6.4  | 4.5  | 3.9  | 3.8  | 4.1  | 6.3  | 4.4  | 3.7  | 3.1  | 4.1  |
| Gm13306 | 0.0  | 0.0  | 0.0  | 0.0  | 0.0  | 0.0  | 0.0  | 0.0  | 0.0  | 0.0  | 0.0  | 0.0  |
| Gm13308 | 0.8  | 0.2  | 0.4  | 0.4  | 0.2  | 0.9  | 0.5  | 1.6  | 0.3  | 0.3  | 0.0  | 0.1  |
| Gm13315 | 0.0  | 0.0  | 0.0  | 0.0  | 0.0  | 0.0  | 0.0  | 0.0  | 0.0  | 0.0  | 0.0  | 0.1  |
| Gm13363 | 41.1 | 43.0 | 39.0 | 50.4 | 47.8 | 57.0 | 41.1 | 35.3 | 34.3 | 39.5 | 44.0 | 41.1 |
| Gm13375 | 2.2  | 2.1  | 1.7  | 2.2  | 1.3  | 1.8  | 2.1  | 1.9  | 1.6  | 1.5  | 2.0  | 1.4  |
| Gm13399 | 0.2  | 0.3  | 0.3  | 0.3  | 0.3  | 0.2  | 0.2  | 0.3  | 0.2  | 0.2  | 0.1  | 0.2  |
| Gm13446 | 0.3  | 0.2  | 0.3  | 0.3  | 0.3  | 0.6  | 0.4  | 0.2  | 0.3  | 0.3  | 0.3  | 0.2  |
| Gm13476 | 3.7  | 4.1  | 4.6  | 5.1  | 5.5  | 3.9  | 4.2  | 6.3  | 3.3  | 2.7  | 3.6  | 4.7  |
| Gm13483 | 0.6  | 0.7  | 0.6  | 0.5  | 0.6  | 0.4  | 0.4  | 0.5  | 0.7  | 0.7  | 0.8  | 0.6  |
| Gm13497 | 0.0  | 0.0  | 0.0  | 0.0  | 0.0  | 0.0  | 0.0  | 0.0  | 0.0  | 0.0  | 0.0  | 0.0  |
| Gm13498 | 0.2  | 0.3  | 0.2  | 0.4  | 0.3  | 0.2  | 0.2  | 0.1  | 0.2  | 0.3  | 0.3  | 0.2  |
| Gm13547 | 1.9  | 1.2  | 3.0  | 0.6  | 1.6  | 1.8  | 3.4  | 2.0  | 1.9  | 1.2  | 0.9  | 1.2  |
| Gm13582 | 0.1  | 0.2  | 0.3  | 0.1  | 0.2  | 0.2  | 0.2  | 0.1  | 0.2  | 0.1  | 0.2  | 0.1  |
| Gm13704 | 0.2  | 0.3  | 0.2  | 0.2  | 0.2  | 0.1  | 0.3  | 0.2  | 0.2  | 0.3  | 0.1  | 0.3  |
| Gm13710 | 0.1  | 0.1  | 0.4  | 0.2  | 0.3  | 0.3  | 0.1  | 0.0  | 0.1  | 0.2  | 0.0  | 0.1  |
| Gm13718 | 0.0  | 0.0  | 0.1  | 0.0  | 0.0  | 0.0  | 0.1  | 0.1  | 0.0  | 0.0  | 0.1  | 0.1  |
| Gm13749 | 0.1  | 0.1  | 0.3  | 0.0  | 0.1  | 0.1  | 0.1  | 0.2  | 0.1  | 0.1  | 0.1  | 0.2  |
| Gm13807 | 0.1  | 0.0  | 0.3  | 0.2  | 0.3  | 0.1  | 0.1  | 0.1  | 0.1  | 0.1  | 0.1  | 0.1  |
| Gm13826 | 8.9  | 7.7  | 6.8  | 6.2  | 8.2  | 7.4  | 6.6  | 8.1  | 8.0  | 8.2  | 7.7  | 8.0  |
| Gm13845 | 0.8  | 1.1  | 1.1  | 0.4  | 0.6  | 0.6  | 0.7  | 0.8  | 0.7  | 0.5  | 0.8  | 0.5  |
| Gm13889 | 0.3  | 0.6  | 0.6  | 0.3  | 1.1  | 0.1  | 0.6  | 0.4  | 0.6  | 0.2  | 0.4  | 0.3  |
| Gm13939 | 0.4  | 0.4  | 0.2  | 0.2  | 0.2  | 0.2  | 0.2  | 0.1  | 0.2  | 0.3  | 0.0  | 0.1  |
| Gm14005 | 19.2 | 18.3 | 12.7 | 23.2 | 24.4 | 14.6 | 24.1 | 17.4 | 19.1 | 17.0 | 25.0 | 16.8 |
| Gm14023 | 0.1  | 0.0  | 0.1  | 0.1  | 0.1  | 0.1  | 0.0  | 0.0  | 0.0  | 0.1  | 0.0  | 0.1  |
| Gm14057 | 0.1  | 0.2  | 0.1  | 0.2  | 0.3  | 0.3  | 0.3  | 0.3  | 0.2  | 0.3  | 0.3  | 0.2  |
| Gm14085 | 0.0  | 0.0  | 0.0  | 0.0  | 0.1  | 0.0  | 0.0  | 0.0  | 0.0  | 0.0  | 0.0  | 0.0  |
| Gm14124 | 0.1  | 0.1  | 0.1  | 0.1  | 0.1  | 0.1  | 0.1  | 0.1  | 0.1  | 0.1  | 0.1  | 0.1  |
| Gm14137 | 0.0  | 0.1  | 0.1  | 0.0  | 0.0  | 0.0  | 0.1  | 0.1  | 0.1  | 0.0  | 0.0  | 0.0  |
| Gm14139 | 0.0  | 0.0  | 0.0  | 0.2  | 0.0  | 0.1  | 0.0  | 0.1  | 0.0  | 0.1  | 0.0  | 0.0  |
| Gm14288 | 12.3 | 11.5 | 11.3 | 9.7  | 10.9 | 11.0 | 10.2 | 12.2 | 11.6 | 14.6 | 13.5 | 10.8 |
| Gm14295 | 19.2 | 20.3 | 24.6 | 25.9 | 25.2 | 28.5 | 20.6 | 26.4 | 24.0 | 26.4 | 30.1 | 25.1 |
| Gm14305 | 9.3  | 7.3  | 6.4  | 8.9  | 6.5  | 8.4  | 6.2  | 6.4  | 6.1  | 8.2  | 8.2  | 8.7  |
| Gm14306 | 2.5  | 2.3  | 1.7  | 1.1  | 2.6  | 1.8  | 1.3  | 2.1  | 2.4  | 3.1  | 2.2  | 2.7  |
| Gm14308 | 3.5  | 1.5  | 0.8  | 1.4  | 0.8  | 1.5  | 1.5  | 1.2  | 0.9  | 0.9  | 1.0  | 1.0  |
| Gm14322 | 3.0  | 2.3  | 2.5  | 3.9  | 2.5  | 3.7  | 2.6  | 2.4  | 2.7  | 3.6  | 3.0  | 3.6  |
| Gm14325 | 9.2  | 7.8  | 7.9  | 9.8  | 7.6  | 10.3 | 6.6  | 7.5  | 7.4  | 10.0 | 10.6 | 10.4 |
| Gm14326 | 8.8  | 7.6  | 6.7  | 8.7  | 7.4  | 9.9  | 6.3  | 6.9  | 6.8  | 8.8  | 9.8  | 9.6  |
| Gm14327 | 0.4  | 1.1  | 0.7  | 0.6  | 0.7  | 1.7  | 0.6  | 0.9  | 0.9  | 1.1  | 0.6  | 1.1  |
| Gm14378 | 0.0  | 0.0  | 0.0  | 0.0  | 0.1  | 0.0  | 0.2  | 0.0  | 0.1  | 0.1  | 0.1  | 0.1  |
| Gm14379 | 0.2  | 0.3  | 0.1  | 0.3  | 0.3  | 0.6  | 0.1  | 0.4  | 0.2  | 0.2  | 0.2  | 0.2  |
| Gm14391 | 4.8  | 3.8  | 2.9  | 3.1  | 2.7  | 3.4  | 3.0  | 2.7  | 2.7  | 3.9  | 3.8  | 3.6  |
| Gm14393 | 10.8 | 8.3  | 7.6  | 10.1 | 8.4  | 8.5  | 8.4  | 5.6  | 7.7  | 8.7  | 9.2  | 8.1  |
| Gm14403 | 2.3  | 1.9  | 2.3  | 2.5  | 1.7  | 2.8  | 1.8  | 2.1  | 2.4  | 3.8  | 3.2  | 3.9  |
| Gm14405 | 0.8  | 0.7  | 0.5  | 0.7  | 0.7  | 0.8  | 0.8  | 0.5  | 0.7  | 0.7  | 0.7  | 0.8  |

Online Table 1

|         |        |        |        |        |        |        |        |        |       |        |        |        |
|---------|--------|--------|--------|--------|--------|--------|--------|--------|-------|--------|--------|--------|
| Gm14420 | 8.0    | 6.8    | 6.9    | 9.6    | 7.4    | 8.8    | 7.4    | 7.8    | 7.9   | 8.2    | 8.7    | 9.4    |
| Gm14430 | 3.0    | 2.6    | 2.6    | 3.2    | 2.8    | 3.8    | 2.7    | 2.6    | 2.5   | 3.5    | 3.6    | 3.2    |
| Gm14431 | 3.6    | 3.1    | 3.2    | 4.1    | 3.6    | 3.8    | 2.9    | 3.2    | 2.9   | 3.6    | 3.9    | 4.0    |
| Gm14434 | 4.4    | 3.9    | 3.8    | 4.3    | 4.0    | 5.5    | 3.8    | 3.6    | 3.7   | 5.1    | 5.0    | 4.8    |
| Gm14436 | 8.7    | 7.1    | 7.6    | 9.5    | 8.4    | 8.9    | 7.4    | 8.6    | 6.9   | 7.5    | 9.2    | 8.7    |
| Gm14440 | 3.6    | 3.3    | 3.9    | 4.7    | 4.1    | 4.5    | 3.9    | 4.2    | 3.6   | 4.5    | 4.9    | 5.0    |
| Gm14446 | 1.7    | 1.4    | 1.0    | 1.5    | 0.8    | 1.1    | 0.5    | 0.5    | 0.5   | 0.8    | 0.9    | 1.2    |
| Gm14492 | 0.6    | 0.9    | 1.2    | 0.9    | 1.7    | 1.8    | 1.4    | 1.7    | 1.5   | 0.4    | 0.9    | 1.2    |
| Gm14548 | 0.2    | 0.0    | 0.0    | 0.4    | 0.8    | 0.0    | 0.0    | 0.1    | 0.0   | 0.0    | 0.0    | 0.0    |
| Gm14634 | 0.0    | 0.0    | 0.0    | 0.1    | 0.0    | 0.0    | 0.0    | 0.0    | 0.0   | 0.1    | 0.0    | 0.0    |
| Gm14827 | 0.0    | 0.0    | 0.0    | 0.0    | 0.0    | 0.0    | 0.0    | 0.0    | 0.0   | 0.0    | 0.0    | 0.0    |
| Gm14872 | 2.7    | 2.5    | 2.5    | 2.6    | 2.4    | 2.6    | 2.4    | 2.5    | 2.0   | 3.8    | 2.4    | 2.3    |
| Gm14873 | 0.3    | 0.1    | 0.1    | 0.1    | 0.1    | 0.3    | 0.2    | 0.0    | 0.2   | 0.0    | 0.0    | 0.0    |
| Gm15070 | 0.4    | 0.3    | 0.4    | 0.6    | 0.6    | 0.1    | 0.3    | 0.1    | 0.2   | 0.4    | 0.3    | 0.3    |
| Gm15085 | 0.0    | 0.0    | 0.0    | 0.0    | 0.0    | 0.0    | 0.0    | 0.0    | 0.0   | 0.0    | 0.0    | 0.0    |
| Gm15133 | 0.4    | 0.5    | 0.3    | 0.6    | 0.2    | 0.1    | 0.4    | 0.2    | 0.1   | 0.5    | 0.5    | 0.6    |
| Gm15217 | 0.5    | 0.1    | 0.3    | 0.5    | 0.2    | 0.0    | 0.4    | 0.5    | 0.3   | 0.1    | 0.3    | 0.3    |
| Gm15319 | 0.2    | 0.3    | 0.2    | 0.1    | 0.1    | 0.2    | 0.2    | 0.1    | 0.1   | 0.2    | 0.1    | 0.2    |
| Gm15328 | 0.1    | 0.1    | 0.1    | 0.1    | 0.1    | 0.1    | 0.2    | 0.1    | 0.1   | 0.1    | 0.1    | 0.2    |
| Gm15350 | 1.6    | 0.6    | 0.3    | 1.6    | 1.3    | 1.5    | 1.0    | 1.2    | 0.7   | 1.2    | 0.9    | 0.6    |
| Gm15401 | 0.2    | 0.2    | 0.0    | 0.1    | 0.1    | 0.1    | 0.1    | 0.0    | 0.2   | 0.0    | 0.0    | 0.0    |
| Gm15408 | 0.1    | 0.0    | 0.3    | 0.4    | 0.1    | 0.1    | 0.2    | 0.3    | 0.2   | 0.1    | 0.1    | 0.2    |
| Gm15413 | 0.1    | 0.0    | 0.1    | 0.1    | 0.0    | 0.1    | 0.1    | 0.0    | 0.1   | 0.1    | 0.0    | 0.0    |
| Gm15417 | 2.2    | 2.0    | 1.0    | 2.0    | 1.9    | 2.8    | 1.3    | 1.8    | 2.1   | 1.3    | 1.6    | 2.2    |
| Gm15421 | 0.9    | 1.5    | 0.7    | 0.9    | 1.2    | 0.2    | 0.4    | 0.9    | 1.0   | 1.0    | 0.6    | 1.2    |
| Gm15441 | 0.1    | 0.0    | 0.1    | 0.3    | 0.2    | 0.1    | 0.1    | 0.3    | 0.1   | 0.1    | 0.1    | 0.2    |
| Gm15446 | 1.0    | 0.9    | 0.9    | 1.0    | 0.9    | 1.1    | 1.2    | 1.0    | 0.8   | 1.0    | 1.1    | 1.4    |
| Gm15455 | 0.1    | 0.1    | 0.1    | 0.1    | 0.1    | 0.1    | 0.1    | 0.1    | 0.1   | 0.1    | 0.1    | 0.1    |
| Gm15471 | 0.5    | 0.1    | 0.1    | 0.1    | 0.1    | 0.1    | 0.1    | 0.1    | 0.1   | 0.0    | 0.2    | 0.0    |
| Gm15545 | 0.8    | 0.7    | 0.8    | 0.5    | 1.1    | 0.5    | 0.7    | 0.9    | 0.8   | 0.4    | 0.5    | 0.6    |
| Gm15612 | 0.2    | 0.2    | 0.5    | 0.4    | 0.3    | 0.4    | 0.2    | 0.4    | 0.3   | 0.3    | 0.2    | 0.1    |
| Gm1564  | 0.0    | 0.0    | 0.0    | 0.0    | 0.0    | 0.0    | 0.0    | 0.0    | 0.0   | 0.0    | 0.0    | 0.0    |
| Gm15645 | 0.0    | 0.1    | 0.1    | 0.0    | 0.0    | 0.2    | 0.1    | 0.0    | 0.1   | 0.1    | 0.1    | 0.1    |
| Gm15663 | 0.3    | 0.1    | 0.1    | 0.2    | 0.2    | 0.2    | 0.2    | 0.2    | 0.2   | 0.2    | 0.3    | 0.2    |
| Gm15698 | 0.0    | 0.0    | 0.0    | 0.0    | 0.1    | 0.0    | 0.0    | 0.1    | 0.0   | 0.8    | 0.6    | 0.4    |
| Gm15706 | 0.2    | 0.4    | 0.0    | 0.3    | 0.2    | 0.3    | 0.2    | 0.5    | 0.5   | 0.3    | 0.5    | 0.3    |
| Gm15708 | 0.2    | 0.1    | 0.3    | 0.1    | 0.1    | 0.1    | 0.1    | 0.1    | 0.0   | 0.1    | 0.2    | 0.1    |
| Gm15713 | 0.2    | 0.2    | 0.2    | 0.0    | 0.1    | 0.2    | 0.2    | 0.1    | 0.2   | 0.2    | 0.0    | 0.1    |
| Gm15760 | 0.3    | 0.4    | 0.3    | 0.3    | 0.4    | 0.3    | 0.2    | 0.4    | 0.3   | 0.2    | 0.4    | 0.2    |
| Gm15772 | 1404.5 | 1116.0 | 1221.9 | 1201.7 | 1031.5 | 1350.7 | 1087.2 | 1323.0 | 974.2 | 1158.9 | 1310.1 | 1301.4 |
| Gm15787 | 0.6    | 0.5    | 0.5    | 0.5    | 0.4    | 0.2    | 0.6    | 0.6    | 0.4   | 0.4    | 0.4    | 0.4    |
| Gm15800 | 2.2    | 2.7    | 2.5    | 2.0    | 2.6    | 2.3    | 2.8    | 2.3    | 2.5   | 2.0    | 2.2    | 1.9    |
| Gm15880 | 0.1    | 0.1    | 0.1    | 0.0    | 0.1    | 0.1    | 0.1    | 0.0    | 0.0   | 0.1    | 0.0    | 0.1    |
| Gm15910 | 0.3    | 0.6    | 0.5    | 0.2    | 0.4    | 0.5    | 0.7    | 0.3    | 0.2   | 0.4    | 0.3    | 0.3    |
| Gm15915 | 0.0    | 0.1    | 0.2    | 0.1    | 0.1    | 0.1    | 0.0    | 0.0    | 0.0   | 0.0    | 0.0    | 0.1    |
| Gm15987 | 2.8    | 0.9    | 1.5    | 1.7    | 2.2    | 0.8    | 1.7    | 0.9    | 0.2   | 0.5    | 1.3    | 0.5    |
| Gm16023 | 0.9    | 1.2    | 1.0    | 1.1    | 0.8    | 1.0    | 1.3    | 1.1    | 0.9   | 0.7    | 0.9    | 0.6    |
| Gm16039 | 3.9    | 4.8    | 4.6    | 3.1    | 4.4    | 3.7    | 4.8    | 4.1    | 4.2   | 3.8    | 4.3    | 4.0    |
| Gm16062 | 1.6    | 1.0    | 0.8    | 0.6    | 1.6    | 1.2    | 1.4    | 0.7    | 1.1   | 2.1    | 0.8    | 1.2    |
| Gm16119 | 1.0    | 0.9    | 0.9    | 0.9    | 1.5    | 1.1    | 1.2    | 1.1    | 1.0   | 1.4    | 0.7    | 1.0    |
| Gm16157 | 0.3    | 0.1    | 0.4    | 0.1    | 0.3    | 0.3    | 0.3    | 0.2    | 0.2   | 0.1    | 0.3    | 0.0    |
| Gm16197 | 2.2    | 2.0    | 1.6    | 2.6    | 1.7    | 2.2    | 1.3    | 2.0    | 1.7   | 1.0    | 1.7    | 1.3    |
| Gm16287 | 0.0    | 0.0    | 0.0    | 0.1    | 0.2    | 0.1    | 0.0    | 0.0    | 0.0   | 0.0    | 0.1    | 0.0    |
| Gm16386 | 2.4    | 1.6    | 1.7    | 1.5    | 1.9    | 2.6    | 2.2    | 2.1    | 1.4   | 1.6    | 1.5    | 1.5    |
| Gm16432 | 0.2    | 0.2    | 0.3    | 0.2    | 0.2    | 0.3    | 0.2    | 0.3    | 0.3   | 0.2    | 0.0    | 0.1    |
| Gm16515 | 4.4    | 4.5    | 4.0    | 4.4    | 4.5    | 4.4    | 3.9    | 4.0    | 4.1   | 4.3    | 3.4    | 3.3    |
| Gm16516 | 2.0    | 1.5    | 1.9    | 3.2    | 2.3    | 1.0    | 2.0    | 1.9    | 1.8   | 1.6    | 2.9    | 2.1    |

Online Table 1

|         |      |      |      |       |      |      |      |      |      |      |      |      |
|---------|------|------|------|-------|------|------|------|------|------|------|------|------|
| Gm16523 | 0.0  | 0.1  | 0.0  | 0.0   | 0.0  | 0.0  | 0.0  | 0.0  | 0.0  | 0.0  | 0.0  | 0.0  |
| Gm16532 | 0.1  | 0.0  | 0.0  | 0.0   | 0.1  | 0.1  | 0.0  | 0.0  | 0.0  | 0.0  | 0.0  | 0.0  |
| Gm16548 | 0.0  | 0.0  | 0.0  | 0.0   | 0.0  | 0.0  | 0.0  | 0.0  | 0.0  | 0.0  | 0.1  | 0.0  |
| Gm16576 | 0.4  | 0.3  | 0.3  | 0.4   | 0.4  | 0.8  | 0.3  | 0.1  | 0.2  | 0.3  | 0.2  | 0.2  |
| Gm16596 | 0.1  | 0.3  | 0.2  | 0.1   | 0.2  | 0.2  | 0.1  | 0.2  | 0.3  | 0.2  | 0.3  | 0.3  |
| Gm166   | 3.0  | 3.6  | 3.4  | 3.9   | 3.6  | 4.5  | 3.8  | 3.3  | 3.3  | 3.2  | 3.0  | 2.9  |
| Gm1661  | 0.2  | 0.5  | 0.6  | 0.1   | 0.3  | 0.3  | 0.1  | 0.3  | 0.3  | 0.2  | 0.2  | 0.3  |
| Gm16617 | 0.6  | 1.2  | 1.8  | 1.4   | 1.1  | 1.3  | 1.7  | 1.4  | 1.0  | 1.0  | 1.1  | 1.2  |
| Gm16675 | 0.7  | 1.1  | 0.8  | 0.9   | 1.0  | 0.5  | 0.9  | 0.8  | 0.8  | 0.4  | 0.5  | 0.7  |
| Gm16677 | 0.2  | 0.1  | 0.2  | 0.1   | 0.1  | 0.0  | 0.0  | 0.2  | 0.1  | 0.1  | 0.2  | 0.1  |
| Gm16702 | 0.6  | 0.7  | 0.4  | 0.5   | 0.6  | 0.5  | 0.7  | 0.6  | 0.4  | 0.8  | 0.5  | 0.5  |
| Gm1673  | 3.4  | 3.9  | 3.6  | 2.6   | 2.9  | 3.7  | 3.4  | 4.8  | 3.9  | 4.1  | 3.5  | 5.6  |
| Gm16793 | 0.9  | 0.6  | 0.5  | 1.2   | 0.7  | 0.6  | 0.8  | 0.5  | 0.6  | 0.5  | 0.6  | 0.4  |
| Gm16796 | 0.0  | 0.0  | 0.1  | 0.0   | 0.1  | 0.2  | 0.0  | 0.0  | 0.0  | 0.0  | 0.1  | 0.1  |
| Gm16845 | 0.8  | 0.6  | 0.4  | 0.7   | 0.7  | 1.1  | 0.8  | 0.9  | 0.4  | 0.7  | 0.9  | 1.0  |
| Gm16853 | 0.1  | 0.1  | 0.0  | 0.0   | 0.1  | 0.0  | 0.1  | 0.0  | 0.0  | 0.1  | 0.1  | 0.0  |
| Gm16861 | 0.5  | 0.4  | 0.6  | 0.8   | 0.4  | 0.8  | 0.4  | 0.7  | 0.3  | 0.4  | 0.7  | 0.3  |
| Gm16880 | 0.4  | 0.4  | 0.6  | 0.2   | 0.5  | 0.2  | 0.4  | 0.4  | 0.2  | 0.3  | 0.4  | 0.6  |
| Gm16894 | 0.0  | 0.1  | 0.3  | 0.0   | 0.0  | 0.1  | 0.3  | 0.1  | 0.0  | 0.1  | 0.1  | 0.1  |
| Gm16897 | 0.6  | 0.3  | 0.5  | 0.4   | 0.3  | 0.5  | 0.3  | 0.9  | 0.3  | 0.4  | 0.4  | 0.5  |
| Gm16907 | 3.4  | 3.5  | 2.9  | 2.9   | 2.9  | 2.8  | 2.9  | 2.4  | 2.4  | 2.1  | 2.4  | 2.4  |
| Gm16938 | 0.5  | 0.4  | 0.5  | 0.6   | 0.4  | 0.6  | 0.5  | 0.3  | 0.3  | 0.5  | 0.6  | 0.5  |
| Gm16973 | 0.9  | 1.6  | 1.2  | 0.9   | 1.6  | 0.8  | 1.3  | 1.1  | 1.5  | 1.3  | 1.4  | 1.4  |
| Gm16982 | 1.4  | 1.2  | 1.0  | 1.1   | 1.1  | 0.9  | 1.3  | 1.7  | 1.9  | 1.2  | 1.5  | 1.4  |
| Gm16998 | 0.4  | 0.5  | 0.2  | 0.2   | 0.7  | 0.3  | 0.4  | 0.8  | 0.5  | 0.4  | 0.4  | 0.5  |
| Gm17019 | 0.0  | 0.0  | 0.0  | 0.0   | 0.0  | 0.0  | 0.0  | 0.0  | 0.0  | 0.0  | 0.0  | 0.0  |
| Gm17066 | 1.0  | 0.9  | 1.5  | 1.0   | 1.2  | 1.4  | 1.4  | 1.4  | 1.1  | 1.0  | 1.4  | 1.5  |
| Gm17296 | 0.8  | 1.4  | 1.3  | 0.8   | 1.3  | 1.1  | 1.3  | 1.0  | 1.1  | 1.1  | 1.1  | 1.0  |
| Gm17384 | 0.1  | 0.0  | 0.0  | 0.3   | 0.1  | 0.1  | 0.0  | 0.0  | 0.0  | 0.0  | 0.0  | 0.0  |
| Gm17455 | 0.9  | 0.4  | 0.7  | 0.2   | 0.1  | 0.5  | 0.0  | 0.4  | 0.3  | 0.3  | 0.6  | 0.4  |
| Gm17644 | 2.7  | 4.4  | 4.1  | 2.7   | 3.2  | 3.0  | 4.6  | 2.9  | 1.9  | 2.9  | 2.4  | 3.2  |
| Gm17757 | 0.5  | 0.4  | 0.4  | 0.7   | 0.6  | 0.1  | 0.3  | 0.1  | 0.3  | 0.2  | 0.2  | 0.4  |
| Gm17762 | 1.0  | 0.9  | 1.0  | 0.9   | 1.1  | 1.0  | 1.2  | 1.2  | 1.2  | 0.7  | 0.9  | 0.9  |
| Gm17769 | 0.2  | 0.2  | 0.4  | 0.1   | 0.2  | 0.1  | 0.2  | 0.4  | 0.2  | 0.1  | 0.1  | 0.1  |
| Gm17801 | 0.4  | 0.2  | 0.5  | 0.9   | 0.6  | 0.2  | 0.4  | 0.5  | 0.7  | 0.6  | 0.7  | 0.5  |
| Gm17821 | 1.6  | 2.0  | 1.6  | 1.4   | 1.6  | 1.4  | 1.7  | 1.5  | 1.1  | 1.3  | 1.4  | 1.2  |
| Gm1821  | 72.4 | 73.3 | 70.4 | 101.9 | 79.5 | 87.0 | 89.8 | 83.1 | 71.8 | 74.8 | 85.0 | 79.2 |
| Gm18853 | 0.0  | 0.0  | 0.0  | 0.0   | 0.0  | 0.0  | 0.0  | 0.0  | 0.0  | 0.0  | 0.0  | 0.0  |
| Gm19276 | 0.0  | 0.1  | 0.0  | 0.0   | 0.2  | 0.0  | 0.1  | 0.0  | 0.1  | 0.3  | 0.1  | 0.2  |
| Gm19299 | 0.0  | 0.1  | 0.0  | 0.0   | 0.1  | 0.1  | 0.0  | 0.0  | 0.1  | 0.1  | 0.0  | 0.0  |
| Gm19345 | 0.0  | 0.0  | 0.0  | 0.0   | 0.1  | 0.0  | 0.0  | 0.0  | 0.0  | 0.0  | 0.0  | 0.0  |
| Gm1943  | 11.1 | 7.9  | 7.4  | 10.7  | 9.2  | 9.6  | 7.7  | 8.0  | 8.8  | 9.4  | 9.3  | 8.7  |
| Gm19434 | 0.0  | 0.1  | 0.0  | 0.0   | 0.1  | 0.0  | 0.0  | 0.0  | 0.0  | 0.0  | 0.0  | 0.0  |
| Gm19461 | 0.0  | 0.0  | 0.1  | 0.0   | 0.0  | 0.0  | 0.0  | 0.0  | 0.0  | 0.0  | 0.0  | 0.0  |
| Gm19466 | 0.1  | 0.1  | 0.1  | 0.0   | 0.1  | 0.1  | 0.1  | 0.0  | 0.0  | 0.0  | 0.0  | 0.0  |
| Gm19510 | 0.1  | 0.0  | 0.1  | 0.1   | 0.1  | 0.0  | 0.0  | 0.7  | 0.0  | 0.2  | 0.2  | 0.1  |
| Gm19522 | 0.7  | 2.6  | 5.7  | 1.0   | 1.0  | 1.1  | 1.7  | 2.2  | 1.6  | 1.0  | 1.1  | 1.6  |
| Gm19557 | 0.2  | 0.3  | 0.2  | 0.5   | 0.1  | 0.3  | 0.2  | 0.3  | 0.1  | 0.3  | 0.2  | 0.3  |
| Gm19583 | 0.0  | 0.1  | 0.0  | 0.0   | 0.0  | 0.1  | 0.0  | 0.1  | 0.0  | 0.0  | 0.0  | 0.0  |
| Gm19589 | 0.0  | 0.0  | 0.0  | 0.0   | 0.0  | 0.0  | 0.0  | 0.0  | 0.0  | 0.0  | 0.0  | 0.0  |
| Gm19619 | 0.1  | 0.0  | 0.0  | 0.0   | 0.0  | 0.0  | 0.0  | 0.0  | 0.0  | 0.0  | 0.0  | 0.0  |
| Gm19705 | 3.7  | 2.8  | 3.6  | 3.4   | 4.2  | 2.1  | 2.9  | 1.3  | 2.4  | 4.6  | 2.7  | 2.3  |
| Gm19710 | 0.0  | 0.4  | 0.1  | 0.2   | 0.2  | 0.2  | 0.1  | 0.1  | 0.1  | 0.6  | 0.2  | 0.2  |
| Gm19757 | 1.6  | 2.4  | 1.4  | 1.5   | 1.8  | 1.8  | 1.6  | 1.7  | 1.2  | 1.3  | 1.2  | 1.5  |
| Gm1976  | 1.7  | 2.6  | 1.8  | 1.6   | 2.0  | 2.4  | 1.6  | 2.1  | 1.5  | 2.0  | 1.9  | 1.7  |
| Gm1987  | 0.0  | 0.1  | 0.0  | 0.0   | 0.0  | 0.0  | 0.0  | 0.0  | 0.0  | 0.0  | 0.0  | 0.0  |
| Gm19897 | 0.3  | 0.2  | 0.1  | 0.2   | 0.3  | 0.2  | 0.3  | 0.1  | 0.2  | 0.3  | 0.1  | 0.2  |

Online Table 1

|         |      |      |      |      |      |      |      |      |      |      |      |      |
|---------|------|------|------|------|------|------|------|------|------|------|------|------|
| Gm2002  | 0.1  | 0.0  | 0.0  | 0.0  | 0.0  | 0.1  | 0.0  | 0.1  | 0.1  | 0.0  | 0.0  | 0.0  |
| Gm2011  | 0.7  | 0.7  | 0.8  | 0.3  | 0.5  | 0.7  | 0.6  | 0.5  | 0.3  | 0.5  | 0.6  | 0.9  |
| Gm20110 | 0.0  | 0.0  | 0.0  | 0.0  | 0.0  | 0.0  | 0.0  | 0.0  | 0.0  | 0.0  | 0.0  | 0.1  |
| Gm20139 | 0.0  | 0.0  | 0.0  | 0.1  | 0.0  | 0.0  | 0.0  | 0.0  | 0.0  | 0.0  | 0.0  | 0.0  |
| Gm2016  | 0.1  | 0.1  | 0.1  | 0.1  | 0.1  | 0.1  | 0.2  | 0.1  | 0.1  | 0.1  | 0.1  | 0.1  |
| Gm20199 | 0.3  | 0.5  | 0.3  | 0.4  | 0.5  | 0.4  | 0.6  | 0.3  | 0.3  | 0.5  | 0.4  | 0.3  |
| Gm2022  | 0.1  | 0.1  | 0.1  | 0.1  | 0.1  | 0.1  | 0.1  | 0.1  | 0.1  | 0.1  | 0.1  | 0.1  |
| Gm20257 | 0.9  | 1.1  | 0.6  | 1.0  | 1.1  | 0.8  | 0.7  | 1.0  | 0.6  | 1.0  | 0.8  | 1.2  |
| Gm2027  | 0.0  | 0.1  | 0.1  | 0.1  | 0.1  | 0.0  | 0.0  | 0.0  | 0.1  | 0.0  | 0.1  | 0.1  |
| Gm20300 | 2.9  | 3.2  | 3.7  | 3.7  | 2.8  | 4.4  | 2.6  | 3.0  | 2.6  | 3.0  | 4.0  | 3.4  |
| Gm20324 | 0.2  | 0.5  | 0.1  | 0.0  | 0.2  | 0.0  | 0.1  | 0.2  | 0.0  | 0.1  | 0.5  | 0.1  |
| Gm20337 | 0.3  | 0.4  | 0.3  | 0.7  | 0.4  | 0.4  | 0.1  | 0.5  | 0.3  | 0.3  | 0.2  | 0.3  |
| Gm20362 | 0.0  | 0.0  | 0.1  | 0.1  | 0.1  | 0.0  | 0.0  | 0.0  | 0.1  | 0.1  | 0.1  | 0.1  |
| Gm20554 | 0.0  | 0.0  | 0.0  | 0.1  | 0.0  | 0.1  | 0.1  | 0.0  | 0.0  | 0.1  | 0.1  | 0.1  |
| Gm20594 | 0.0  | 0.0  | 0.0  | 1.0  | 0.0  | 0.2  | 2.1  | 0.0  | 0.3  | 0.0  | 0.0  | 0.0  |
| Gm20597 | 0.0  | 0.0  | 0.0  | 0.0  | 0.0  | 0.0  | 0.0  | 0.0  | 0.0  | 0.0  | 0.0  | 0.0  |
| Gm20604 | 2.5  | 2.1  | 1.7  | 2.0  | 2.6  | 1.9  | 2.3  | 2.0  | 2.2  | 1.8  | 2.2  | 1.4  |
| Gm20605 | 0.9  | 0.6  | 0.4  | 0.7  | 1.2  | 0.6  | 1.0  | 0.5  | 0.9  | 0.1  | 0.3  | 0.2  |
| Gm20735 | 0.3  | 0.1  | 0.5  | 0.1  | 0.2  | 0.0  | 0.2  | 0.0  | 0.2  | 0.2  | 0.0  | 0.3  |
| Gm20736 | 0.0  | 0.0  | 0.0  | 0.0  | 0.0  | 0.0  | 0.0  | 0.0  | 0.0  | 0.0  | 0.0  | 0.0  |
| Gm20744 | 1.7  | 0.8  | 0.5  | 1.5  | 0.8  | 1.5  | 1.0  | 0.5  | 0.8  | 2.8  | 2.9  | 1.2  |
| Gm20748 | 5.4  | 3.9  | 3.5  | 6.2  | 4.3  | 5.6  | 5.6  | 4.1  | 3.9  | 4.5  | 4.0  | 2.7  |
| Gm20752 | 0.0  | 0.0  | 0.0  | 0.0  | 0.0  | 0.0  | 0.0  | 0.0  | 0.0  | 0.0  | 0.0  | 0.0  |
| Gm20755 | 0.1  | 0.0  | 0.1  | 0.0  | 0.0  | 0.0  | 0.0  | 0.0  | 0.0  | 0.1  | 0.1  | 0.0  |
| Gm20765 | 0.0  | 0.0  | 0.0  | 0.0  | 0.0  | 0.0  | 0.0  | 0.0  | 0.0  | 0.0  | 0.0  | 0.0  |
| Gm20767 | 0.3  | 0.3  | 0.1  | 0.1  | 0.2  | 0.2  | 0.3  | 0.2  | 0.0  | 0.2  | 0.2  | 0.2  |
| Gm20878 | 0.0  | 0.5  | 0.5  | 0.5  | 0.2  | 0.0  | 0.0  | 0.0  | 0.3  | 0.3  | 0.2  | 0.3  |
| Gm20939 | 0.8  | 1.4  | 1.7  | 0.7  | 0.9  | 1.2  | 1.0  | 1.2  | 1.2  | 0.9  | 1.1  | 1.1  |
| Gm21119 | 0.1  | 0.3  | 0.3  | 0.1  | 0.1  | 0.3  | 0.2  | 0.1  | 0.1  | 0.4  | 0.1  | 0.2  |
| Gm2115  | 3.3  | 1.6  | 1.0  | 3.2  | 2.6  | 2.9  | 5.3  | 0.9  | 1.4  | 2.8  | 3.1  | 2.3  |
| Gm21293 | 0.0  | 0.0  | 0.0  | 0.0  | 0.0  | 0.0  | 0.0  | 0.0  | 0.0  | 0.0  | 0.0  | 0.0  |
| Gm21304 | 0.0  | 0.0  | 0.0  | 0.0  | 0.0  | 0.0  | 0.0  | 0.0  | 0.0  | 0.0  | 0.0  | 0.0  |
| Gm21312 | 0.0  | 0.0  | 0.0  | 0.0  | 0.0  | 0.0  | 0.0  | 0.0  | 0.0  | 0.0  | 0.0  | 0.0  |
| Gm21319 | 0.0  | 0.0  | 0.0  | 0.0  | 0.0  | 0.0  | 0.0  | 0.0  | 0.0  | 0.0  | 0.0  | 0.0  |
| Gm216   | 0.6  | 0.7  | 0.9  | 1.2  | 0.5  | 1.1  | 0.9  | 0.6  | 0.5  | 0.5  | 0.5  | 0.7  |
| Gm21949 | 0.0  | 0.0  | 0.0  | 0.0  | 0.2  | 0.0  | 0.0  | 0.0  | 0.0  | 0.0  | 0.0  | 0.0  |
| Gm2381  | 0.0  | 0.1  | 0.1  | 0.1  | 0.1  | 0.1  | 0.0  | 0.0  | 0.0  | 0.1  | 0.0  | 0.0  |
| Gm2382  | 7.6  | 8.8  | 8.4  | 7.8  | 8.3  | 6.9  | 8.5  | 8.7  | 9.4  | 7.2  | 8.3  | 8.8  |
| Gm2518  | 1.1  | 1.1  | 1.3  | 1.1  | 1.2  | 1.0  | 1.2  | 1.3  | 1.3  | 1.1  | 1.1  | 1.0  |
| Gm266   | 0.0  | 0.0  | 0.0  | 0.0  | 0.0  | 0.0  | 0.0  | 0.1  | 0.1  | 0.0  | 0.0  | 0.1  |
| Gm2897  | 0.7  | 1.2  | 1.0  | 0.4  | 0.5  | 0.8  | 0.9  | 1.1  | 0.8  | 0.7  | 1.0  | 0.8  |
| Gm2a    | 27.5 | 24.5 | 21.4 | 28.0 | 23.4 | 28.2 | 19.0 | 15.5 | 14.6 | 27.1 | 22.3 | 21.7 |
| Gm3002  | 0.2  | 0.4  | 0.6  | 0.0  | 0.2  | 0.1  | 0.2  | 0.6  | 0.0  | 0.7  | 0.3  | 0.2  |
| Gm3086  | 0.1  | 0.2  | 0.1  | 0.0  | 0.3  | 0.1  | 0.1  | 0.1  | 0.1  | 0.2  | 0.5  | 0.3  |
| Gm3219  | 1.3  | 2.0  | 1.7  | 1.1  | 1.7  | 1.5  | 1.5  | 2.1  | 1.6  | 2.3  | 1.0  | 1.8  |
| Gm3230  | 0.2  | 0.1  | 0.2  | 0.2  | 0.2  | 0.2  | 0.1  | 0.1  | 0.2  | 0.1  | 0.1  | 0.2  |
| Gm3258  | 0.6  | 0.2  | 0.2  | 0.2  | 0.2  | 0.5  | 0.4  | 0.3  | 0.3  | 0.2  | 0.2  | 0.5  |
| Gm3264  | 0.4  | 1.0  | 0.9  | 0.3  | 0.3  | 0.2  | 0.3  | 0.7  | 1.0  | 0.7  | 0.9  | 1.0  |
| Gm3317  | 0.3  | 0.5  | 0.5  | 0.1  | 0.2  | 0.3  | 0.4  | 0.5  | 0.4  | 0.4  | 0.3  | 0.4  |
| Gm3383  | 0.4  | 0.5  | 0.4  | 0.4  | 0.1  | 0.5  | 0.4  | 0.5  | 0.2  | 0.4  | 0.5  | 0.5  |
| Gm3414  | 0.5  | 0.5  | 0.4  | 0.5  | 0.4  | 0.3  | 0.4  | 0.2  | 0.4  | 0.4  | 0.5  | 0.4  |
| Gm3417  | 0.0  | 0.1  | 0.0  | 0.1  | 0.0  | 0.0  | 0.0  | 0.0  | 0.0  | 0.0  | 0.0  | 0.0  |
| Gm3435  | 0.5  | 0.7  | 0.6  | 0.4  | 0.6  | 0.6  | 0.5  | 0.3  | 0.4  | 0.4  | 0.5  | 0.5  |
| Gm3494  | 0.3  | 0.5  | 0.5  | 0.1  | 0.3  | 0.3  | 0.4  | 0.5  | 0.5  | 0.4  | 0.3  | 0.4  |
| Gm3500  | 0.2  | 0.6  | 0.5  | 0.3  | 0.2  | 0.4  | 0.4  | 0.5  | 0.4  | 0.3  | 0.4  | 0.4  |
| Gm3558  | 0.5  | 0.7  | 0.7  | 0.4  | 0.3  | 0.6  | 0.6  | 0.8  | 0.6  | 0.7  | 0.6  | 0.6  |
| Gm3604  | 0.6  | 1.3  | 1.5  | 0.6  | 1.3  | 1.1  | 1.0  | 1.1  | 0.9  | 0.8  | 1.0  | 1.1  |

Online Table 1



|        |       |       |       |       |       |       |       |      |      |       |       |       |
|--------|-------|-------|-------|-------|-------|-------|-------|------|------|-------|-------|-------|
| Gm3696 | 0.3   | 0.6   | 0.6   | 0.3   | 0.3   | 0.5   | 0.5   | 0.6  | 0.4  | 0.4   | 0.6   | 0.5   |
| Gm3716 | 0.9   | 0.7   | 0.6   | 0.5   | 0.7   | 0.5   | 0.5   | 0.3  | 0.4  | 0.4   | 0.5   | 0.3   |
| Gm3776 | 0.7   | 0.7   | 0.5   | 0.9   | 0.6   | 1.3   | 0.4   | 0.5  | 0.0  | 0.1   | 0.1   | 0.2   |
| Gm3893 | 2.0   | 3.7   | 3.7   | 1.5   | 1.7   | 1.4   | 1.7   | 3.2  | 1.2  | 0.9   | 1.3   | 1.4   |
| Gm4013 | 0.6   | 1.4   | 1.1   | 0.4   | 0.5   | 1.6   | 0.7   | 0.7  | 0.2  | 1.7   | 0.4   | 0.4   |
| Gm4027 | 0.3   | 0.2   | 0.3   | 0.4   | 0.4   | 0.2   | 0.5   | 0.3  | 0.3  | 0.3   | 0.4   | 0.4   |
| Gm4070 | 13.8  | 6.9   | 4.4   | 15.1  | 7.6   | 6.1   | 4.5   | 4.2  | 4.6  | 4.9   | 3.4   | 10.0  |
| Gm4262 | 1.2   | 1.1   | 0.9   | 1.2   | 1.2   | 1.0   | 0.9   | 1.2  | 1.1  | 0.7   | 0.8   | 0.8   |
| Gm4285 | 0.7   | 0.9   | 0.7   | 1.0   | 0.9   | 0.4   | 0.6   | 0.7  | 0.7  | 0.9   | 0.5   | 1.0   |
| Gm4340 | 0.0   | 0.0   | 0.0   | 0.0   | 0.0   | 0.0   | 0.0   | 0.0  | 0.0  | 0.0   | 0.0   | 0.0   |
| Gm4349 | 1.0   | 1.4   | 1.0   | 1.1   | 1.3   | 1.1   | 1.0   | 0.9  | 1.0  | 0.8   | 1.3   | 1.0   |
| Gm4477 | 0.0   | 0.1   | 0.3   | 0.0   | 0.1   | 0.0   | 0.0   | 0.1  | 0.0  | 0.0   | 0.0   | 0.0   |
| Gm4532 | 0.9   | 1.0   | 1.5   | 1.3   | 0.8   | 1.3   | 1.5   | 1.4  | 0.6  | 0.7   | 0.5   | 0.8   |
| Gm4636 | 0.4   | 0.6   | 0.5   | 0.2   | 0.5   | 0.3   | 0.4   | 0.4  | 0.5  | 0.5   | 0.6   | 0.4   |
| Gm4724 | 4.2   | 3.7   | 3.6   | 4.2   | 3.9   | 5.2   | 3.6   | 3.5  | 3.5  | 4.8   | 4.8   | 4.6   |
| Gm4736 | 0.1   | 0.1   | 0.2   | 0.1   | 0.2   | 0.1   | 0.1   | 0.1  | 0.1  | 0.0   | 0.1   | 0.0   |
| Gm4759 | 0.1   | 0.0   | 0.0   | 0.0   | 0.1   | 0.0   | 0.0   | 0.0  | 0.0  | 0.0   | 0.0   | 0.0   |
| Gm4787 | 0.1   | 0.1   | 0.1   | 0.2   | 0.2   | 0.2   | 0.2   | 0.1  | 0.2  | 0.1   | 0.0   | 0.2   |
| Gm4788 | 5.5   | 6.3   | 5.4   | 2.0   | 3.4   | 1.8   | 2.5   | 3.0  | 4.8  | 4.8   | 2.4   | 5.3   |
| Gm4832 | 0.1   | 0.2   | 0.1   | 0.0   | 0.1   | 0.0   | 0.2   | 0.3  | 0.0  | 0.1   | 0.1   | 0.5   |
| Gm4841 | 0.3   | 0.1   | 0.3   | 0.4   | 0.2   | 0.1   | 0.0   | 0.1  | 0.1  | 0.1   | 0.0   | 0.4   |
| Gm4884 | 0.0   | 0.0   | 0.0   | 0.0   | 0.0   | 0.0   | 0.0   | 0.0  | 0.0  | 0.0   | 0.0   | 0.0   |
| Gm4890 | 0.5   | 0.3   | 0.3   | 0.5   | 0.4   | 0.5   | 0.3   | 0.3  | 0.3  | 0.3   | 0.3   | 0.4   |
| Gm4925 | 0.1   | 0.3   | 0.4   | 0.4   | 0.3   | 0.4   | 0.4   | 0.5  | 0.5  | 0.3   | 0.5   | 0.2   |
| Gm4944 | 2.9   | 4.2   | 4.8   | 4.6   | 4.7   | 5.3   | 3.7   | 4.4  | 3.9  | 4.5   | 6.1   | 5.6   |
| Gm4951 | 1.3   | 0.6   | 1.5   | 1.3   | 0.7   | 0.8   | 0.5   | 0.3  | 0.4  | 0.2   | 0.6   | 1.5   |
| Gm4952 | 0.0   | 0.1   | 0.0   | 0.0   | 0.0   | 0.0   | 0.0   | 0.0  | 0.0  | 0.0   | 0.0   | 0.0   |
| Gm4961 | 3.5   | 3.6   | 2.7   | 3.8   | 3.6   | 2.7   | 3.2   | 2.5  | 3.1  | 1.5   | 2.1   | 2.5   |
| Gm4980 | 0.1   | 0.1   | 0.2   | 0.0   | 0.2   | 0.1   | 0.4   | 0.3  | 0.3  | 0.1   | 0.1   | 0.1   |
| Gm4984 | 0.1   | 0.0   | 0.0   | 0.0   | 0.0   | 0.0   | 0.2   | 0.0  | 0.1  | 0.0   | 0.0   | 0.2   |
| Gm5039 | 0.2   | 0.1   | 0.1   | 0.2   | 0.2   | 0.0   | 0.2   | 0.1  | 0.1  | 0.1   | 0.1   | 0.1   |
| Gm5069 | 0.5   | 0.3   | 0.5   | 0.9   | 0.5   | 0.7   | 0.7   | 0.5  | 0.4  | 0.5   | 0.5   | 0.6   |
| Gm5077 | 3.1   | 3.5   | 5.4   | 2.4   | 4.6   | 2.9   | 1.8   | 2.8  | 2.5  | 8.0   | 4.4   | 4.7   |
| Gm5082 | 0.0   | 0.0   | 0.0   | 0.1   | 0.1   | 0.1   | 0.0   | 0.0  | 0.0  | 0.0   | 0.0   | 0.0   |
| Gm5086 | 0.2   | 0.1   | 0.1   | 0.0   | 0.1   | 0.2   | 0.1   | 0.1  | 0.1  | 0.1   | 0.0   | 0.1   |
| Gm5088 | 2.1   | 1.5   | 1.5   | 2.0   | 1.8   | 2.1   | 1.7   | 1.9  | 1.2  | 1.7   | 2.0   | 1.9   |
| Gm5105 | 0.0   | 0.0   | 0.0   | 0.1   | 0.0   | 0.1   | 0.0   | 0.0  | 0.0  | 0.0   | 0.0   | 0.0   |
| Gm5113 | 0.8   | 1.0   | 1.0   | 1.2   | 0.7   | 1.1   | 1.1   | 1.0  | 1.1  | 0.8   | 1.0   | 1.4   |
| Gm5114 | 0.0   | 0.0   | 0.0   | 0.0   | 0.0   | 0.0   | 0.0   | 0.0  | 0.0  | 0.0   | 0.0   | 0.0   |
| Gm5122 | 0.0   | 0.0   | 0.0   | 0.0   | 0.0   | 0.0   | 0.0   | 0.0  | 0.0  | 0.0   | 0.0   | 0.0   |
| Gm5124 | 0.1   | 0.2   | 0.0   | 0.1   | 0.1   | 0.4   | 0.1   | 0.2  | 0.0  | 0.1   | 0.1   | 0.1   |
| Gm5126 | 0.1   | 0.2   | 0.1   | 0.1   | 0.1   | 0.1   | 0.1   | 0.1  | 0.1  | 0.3   | 0.1   | 0.1   |
| Gm5127 | 0.3   | 0.0   | 0.1   | 0.1   | 0.1   | 0.0   | 0.0   | 0.0  | 0.0  | 0.0   | 0.0   | 0.1   |
| Gm5129 | 0.7   | 1.1   | 1.5   | 1.0   | 1.8   | 0.3   | 2.0   | 1.8  | 1.5  | 1.1   | 0.9   | 2.3   |
| Gm514  | 0.0   | 0.1   | 0.0   | 0.0   | 0.0   | 0.1   | 0.0   | 0.1  | 0.0  | 0.0   | 0.0   | 0.0   |
| Gm5141 | 0.6   | 0.8   | 1.2   | 0.8   | 1.0   | 1.2   | 0.7   | 1.0  | 0.7  | 0.9   | 0.8   | 0.8   |
| Gm5148 | 11.2  | 8.8   | 9.4   | 9.6   | 9.1   | 9.7   | 9.7   | 10.5 | 8.9  | 9.3   | 10.4  | 10.8  |
| Gm5150 | 0.0   | 0.0   | 0.0   | 0.1   | 0.6   | 0.0   | 0.0   | 0.0  | 0.0  | 0.1   | 0.0   | 0.1   |
| Gm5176 | 0.4   | 1.0   | 1.1   | 0.2   | 0.8   | 0.4   | 1.4   | 0.4  | 0.4  | 0.7   | 0.6   | 0.4   |
| Gm5177 | 0.1   | 0.0   | 0.1   | 0.2   | 0.1   | 0.1   | 0.1   | 0.1  | 0.0  | 0.1   | 0.2   | 0.1   |
| Gm527  | 0.8   | 1.4   | 1.1   | 1.0   | 1.0   | 1.1   | 1.2   | 1.6  | 1.6  | 1.4   | 1.8   | 1.8   |
| Gm53   | 0.9   | 0.1   | 0.3   | 2.3   | 0.5   | 0.4   | 0.1   | 0.0  | 0.1  | 0.1   | 0.4   | 0.1   |
| Gm5415 | 0.0   | 0.0   | 0.0   | 0.0   | 0.0   | 0.0   | 0.0   | 0.0  | 0.0  | 0.0   | 0.0   | 0.0   |
| Gm5424 | 232.0 | 130.5 | 100.6 | 352.6 | 234.7 | 325.5 | 140.8 | 65.0 | 55.6 | 114.8 | 110.9 | 120.0 |
| Gm5431 | 9.6   | 6.7   | 4.2   | 9.4   | 5.5   | 7.9   | 6.9   | 2.5  | 3.6  | 3.6   | 5.4   | 5.3   |
| Gm5434 | 0.1   | 0.0   | 0.0   | 0.0   | 0.0   | 0.1   | 0.1   | 0.0  | 0.0  | 0.0   | 0.1   | 0.0   |
| Gm5458 | 0.0   | 0.0   | 0.0   | 0.0   | 0.0   | 0.0   | 0.0   | 0.0  | 0.0  | 0.1   | 0.0   | 0.0   |

Online Table 1

|        |       |      |      |       |      |      |      |      |      |      |      |      |
|--------|-------|------|------|-------|------|------|------|------|------|------|------|------|
| Gm5464 | 0.6   | 0.4  | 0.6  | 0.2   | 0.4  | 0.4  | 0.6  | 0.7  | 0.5  | 0.2  | 0.4  | 0.5  |
| Gm5468 | 0.0   | 0.0  | 0.0  | 0.0   | 0.0  | 0.0  | 0.0  | 0.0  | 0.0  | 0.0  | 0.0  | 0.0  |
| Gm5475 | 0.0   | 0.0  | 0.0  | 0.0   | 0.0  | 0.0  | 0.0  | 0.0  | 0.0  | 0.0  | 0.0  | 0.0  |
| Gm5506 | 8.8   | 7.7  | 6.4  | 11.7  | 10.5 | 9.3  | 10.9 | 9.2  | 9.8  | 9.8  | 9.7  | 11.6 |
| Gm5512 | 0.2   | 0.2  | 0.6  | 0.3   | 0.3  | 0.2  | 0.1  | 0.2  | 0.4  | 0.2  | 0.3  | 0.3  |
| Gm5523 | 1.4   | 1.1  | 1.5  | 2.9   | 1.9  | 1.7  | 1.9  | 1.5  | 1.6  | 1.3  | 1.2  | 1.7  |
| Gm5531 | 0.0   | 0.1  | 0.0  | 0.0   | 0.0  | 0.0  | 0.0  | 0.0  | 0.0  | 0.0  | 0.0  | 0.0  |
| Gm5538 | 0.3   | 0.1  | 0.1  | 0.2   | 0.1  | 0.2  | 0.0  | 0.0  | 0.0  | 0.0  | 0.1  | 0.0  |
| Gm5544 | 0.0   | 0.0  | 0.0  | 0.3   | 0.0  | 0.0  | 0.1  | 0.0  | 0.0  | 0.1  | 0.0  | 0.3  |
| Gm5577 | 0.3   | 0.5  | 0.4  | 0.0   | 0.3  | 0.2  | 0.2  | 0.2  | 0.6  | 0.1  | 0.3  | 0.5  |
| Gm5595 | 1.0   | 1.4  | 1.3  | 1.0   | 0.9  | 1.2  | 0.9  | 1.2  | 1.3  | 1.8  | 1.3  | 1.2  |
| Gm5607 | 0.0   | 0.0  | 0.0  | 0.0   | 0.0  | 0.0  | 0.0  | 0.0  | 0.0  | 0.0  | 0.0  | 0.0  |
| Gm561  | 17.2  | 15.4 | 10.3 | 16.0  | 13.4 | 16.1 | 14.3 | 9.8  | 15.7 | 17.6 | 13.3 | 13.7 |
| Gm5617 | 5.1   | 5.3  | 5.8  | 5.4   | 5.0  | 5.3  | 4.2  | 6.0  | 6.1  | 7.1  | 6.4  | 5.0  |
| Gm5627 | 0.1   | 0.0  | 0.2  | 0.1   | 0.2  | 0.0  | 0.1  | 0.4  | 0.0  | 0.0  | 0.0  | 0.0  |
| Gm5643 | 0.5   | 0.6  | 0.9  | 0.8   | 0.8  | 0.6  | 1.0  | 1.2  | 1.2  | 1.0  | 1.2  | 1.2  |
| Gm5662 | 0.0   | 0.0  | 0.0  | 0.0   | 0.0  | 0.0  | 0.0  | 0.0  | 0.0  | 0.0  | 0.0  | 0.0  |
| Gm5766 | 0.0   | 0.0  | 0.0  | 0.0   | 0.0  | 0.0  | 0.0  | 0.0  | 0.0  | 0.1  | 0.0  | 0.0  |
| Gm5779 | 0.1   | 0.0  | 0.1  | 0.0   | 0.1  | 0.1  | 0.2  | 0.0  | 0.2  | 0.0  | 0.1  | 0.3  |
| Gm5795 | 0.0   | 0.0  | 0.0  | 0.0   | 0.0  | 0.0  | 0.0  | 0.0  | 0.0  | 0.0  | 0.0  | 0.0  |
| Gm5796 | 0.3   | 0.4  | 0.4  | 0.3   | 0.3  | 0.4  | 0.4  | 0.6  | 0.4  | 0.3  | 0.5  | 0.5  |
| Gm5801 | 6.7   | 6.9  | 7.5  | 6.2   | 7.6  | 6.8  | 6.9  | 6.9  | 6.7  | 7.0  | 6.8  | 7.0  |
| Gm5803 | 6.1   | 5.5  | 7.4  | 6.0   | 6.2  | 4.8  | 8.1  | 7.9  | 8.3  | 8.2  | 8.3  | 7.9  |
| Gm5820 | 0.5   | 0.2  | 0.2  | 0.4   | 0.3  | 0.5  | 0.3  | 0.1  | 0.2  | 0.5  | 0.4  | 0.2  |
| Gm5860 | 0.2   | 0.1  | 0.1  | 0.2   | 0.1  | 0.1  | 0.0  | 0.1  | 0.1  | 0.2  | 0.1  | 0.1  |
| Gm5878 | 0.0   | 0.0  | 0.0  | 0.0   | 0.0  | 0.0  | 0.0  | 0.0  | 0.0  | 0.0  | 0.0  | 0.0  |
| Gm5901 | 0.4   | 0.1  | 0.4  | 0.5   | 0.3  | 0.2  | 0.4  | 0.4  | 0.4  | 0.1  | 0.6  | 0.3  |
| Gm5918 | 10.0  | 10.0 | 9.3  | 12.4  | 7.4  | 12.8 | 7.8  | 6.5  | 5.9  | 7.5  | 8.9  | 10.0 |
| Gm595  | 0.0   | 0.1  | 0.0  | 0.0   | 0.0  | 0.0  | 0.0  | 0.0  | 0.0  | 0.0  | 0.0  | 0.0  |
| Gm6034 | 0.1   | 0.0  | 0.0  | 0.0   | 0.0  | 0.0  | 0.1  | 0.0  | 0.1  | 0.0  | 0.0  | 0.1  |
| Gm608  | 2.5   | 2.7  | 2.9  | 2.4   | 2.2  | 2.3  | 2.3  | 2.4  | 2.2  | 2.0  | 2.2  | 2.1  |
| Gm6086 | 1.5   | 1.2  | 1.2  | 1.3   | 1.6  | 0.5  | 2.0  | 1.5  | 1.3  | 0.9  | 1.2  | 1.1  |
| Gm6225 | 0.1   | 0.0  | 0.3  | 0.1   | 0.1  | 0.2  | 0.2  | 0.2  | 0.2  | 0.3  | 0.1  | 0.2  |
| Gm6251 | 11.8  | 8.2  | 10.3 | 9.8   | 10.0 | 10.2 | 12.1 | 9.0  | 8.7  | 11.8 | 9.2  | 11.4 |
| Gm6277 | 0.1   | 0.1  | 0.2  | 0.2   | 0.0  | 0.0  | 0.0  | 0.1  | 0.0  | 0.1  | 0.0  | 0.1  |
| Gm6297 | 0.4   | 0.3  | 0.3  | 0.1   | 0.4  | 0.6  | 0.4  | 0.3  | 0.3  | 0.2  | 0.3  | 0.4  |
| Gm6313 | 0.0   | 0.1  | 0.1  | 0.2   | 0.0  | 0.1  | 0.1  | 0.1  | 0.1  | 0.1  | 0.1  | 0.1  |
| Gm6377 | 0.1   | 0.0  | 0.0  | 0.2   | 0.7  | 0.0  | 0.1  | 0.1  | 0.1  | 0.2  | 0.0  | 0.1  |
| Gm6402 | 1.3   | 1.0  | 0.9  | 1.6   | 1.3  | 1.2  | 1.4  | 1.1  | 1.2  | 1.3  | 1.2  | 1.3  |
| Gm6432 | 0.0   | 0.1  | 0.1  | 0.0   | 0.0  | 0.2  | 0.0  | 0.1  | 0.1  | 0.1  | 0.0  | 0.0  |
| Gm6455 | 0.3   | 0.0  | 0.0  | 0.1   | 0.1  | 0.1  | 0.1  | 0.1  | 0.0  | 0.0  | 0.0  | 0.0  |
| Gm6460 | 0.2   | 0.1  | 0.0  | 0.1   | 0.2  | 0.1  | 0.2  | 0.2  | 0.0  | 0.0  | 0.1  | 0.1  |
| Gm6484 | 0.7   | 1.1  | 1.0  | 0.3   | 0.6  | 0.1  | 1.2  | 2.4  | 1.4  | 0.9  | 1.6  | 1.2  |
| Gm6498 | 0.1   | 0.1  | 0.1  | 0.1   | 0.2  | 0.0  | 0.3  | 0.2  | 0.0  | 0.0  | 0.1  | 0.1  |
| Gm6524 | 0.0   | 0.0  | 0.0  | 0.0   | 0.0  | 0.0  | 0.0  | 0.0  | 0.0  | 0.1  | 0.0  | 0.0  |
| Gm6525 | 0.0   | 0.1  | 0.3  | 0.0   | 0.1  | 0.0  | 0.1  | 0.0  | 0.1  | 0.1  | 0.0  | 0.0  |
| Gm6537 | 1.3   | 1.1  | 1.3  | 1.8   | 0.5  | 0.6  | 0.8  | 1.8  | 1.0  | 0.7  | 1.4  | 0.9  |
| Gm6548 | 16.6  | 14.1 | 15.1 | 18.5  | 15.4 | 12.5 | 12.3 | 10.8 | 11.7 | 12.2 | 11.9 | 17.6 |
| Gm6568 | 0.1   | 0.2  | 0.3  | 0.5   | 0.1  | 0.1  | 0.3  | 0.3  | 0.2  | 0.2  | 0.2  | 0.5  |
| Gm6578 | 0.1   | 0.1  | 0.0  | 0.0   | 0.1  | 0.0  | 0.1  | 0.0  | 0.0  | 0.1  | 0.0  | 0.0  |
| Gm6583 | 0.1   | 0.1  | 0.0  | 0.2   | 0.1  | 0.2  | 0.1  | 0.1  | 0.1  | 0.1  | 0.1  | 0.0  |
| Gm6607 | 0.0   | 0.1  | 0.1  | 0.0   | 0.1  | 0.0  | 0.1  | 0.1  | 0.1  | 0.0  | 0.0  | 0.1  |
| Gm6623 | 0.5   | 0.5  | 0.5  | 0.8   | 0.7  | 0.8  | 0.6  | 0.4  | 0.4  | 0.7  | 0.9  | 0.7  |
| Gm6634 | 1.1   | 0.4  | 0.3  | 0.6   | 0.7  | 0.6  | 0.4  | 0.3  | 0.2  | 0.4  | 0.6  | 0.5  |
| Gm6642 | 0.3   | 0.1  | 0.5  | 0.0   | 0.1  | 0.0  | 0.2  | 0.2  | 0.2  | 0.2  | 0.0  | 0.1  |
| Gm6644 | 100.8 | 73.0 | 57.3 | 112.6 | 88.3 | 82.0 | 66.6 | 62.3 | 56.0 | 75.1 | 78.6 | 61.8 |
| Gm6654 | 1.3   | 0.9  | 1.3  | 1.9   | 1.4  | 1.1  | 1.0  | 1.7  | 1.3  | 1.0  | 1.1  | 1.3  |

Online Table 1

|        |      |      |      |      |      |      |      |      |      |      |      |      |
|--------|------|------|------|------|------|------|------|------|------|------|------|------|
| Gm6682 | 5.6  | 5.6  | 7.0  | 9.3  | 6.4  | 6.1  | 9.8  | 7.9  | 7.1  | 4.8  | 7.7  | 5.2  |
| Gm6710 | 3.4  | 3.3  | 3.7  | 5.4  | 3.7  | 4.8  | 3.3  | 3.6  | 3.3  | 4.5  | 4.9  | 4.8  |
| Gm6756 | 0.0  | 0.0  | 0.0  | 0.0  | 0.0  | 0.0  | 0.0  | 0.0  | 0.0  | 0.0  | 0.0  | 0.0  |
| Gm6787 | 0.1  | 0.1  | 0.0  | 0.0  | 0.0  | 0.0  | 0.1  | 0.0  | 0.0  | 0.1  | 0.0  | 0.0  |
| Gm6793 | 23.2 | 25.4 | 34.7 | 28.8 | 32.1 | 25.4 | 31.4 | 34.1 | 26.0 | 27.1 | 33.7 | 38.5 |
| Gm684  | 1.9  | 2.5  | 2.7  | 2.8  | 2.1  | 3.3  | 2.3  | 3.0  | 2.1  | 1.8  | 2.6  | 2.8  |
| Gm6878 | 0.0  | 0.1  | 0.0  | 0.0  | 0.1  | 0.0  | 0.2  | 0.1  | 0.0  | 0.0  | 0.0  | 0.0  |
| Gm6880 | 0.1  | 0.0  | 0.2  | 0.1  | 0.0  | 0.2  | 0.0  | 0.0  | 0.0  | 0.0  | 0.0  | 0.0  |
| Gm6904 | 0.7  | 0.5  | 0.3  | 0.9  | 0.5  | 0.5  | 0.0  | 0.1  | 0.0  | 0.6  | 0.2  | 0.3  |
| Gm6981 | 0.4  | 0.4  | 0.7  | 0.5  | 0.6  | 0.4  | 0.5  | 0.5  | 0.3  | 0.4  | 0.5  | 0.5  |
| Gm7030 | 8.2  | 5.0  | 5.7  | 9.0  | 7.6  | 6.6  | 3.0  | 3.0  | 2.9  | 3.1  | 1.9  | 2.8  |
| Gm7102 | 2.8  | 3.1  | 2.6  | 2.0  | 3.2  | 2.1  | 3.0  | 2.6  | 2.5  | 2.6  | 1.9  | 2.1  |
| Gm711  | 0.0  | 0.0  | 0.0  | 0.0  | 0.1  | 0.1  | 0.0  | 0.0  | 0.1  | 0.0  | 0.0  | 0.0  |
| Gm7120 | 8.6  | 8.5  | 11.5 | 9.3  | 8.7  | 6.4  | 13.3 | 9.2  | 11.6 | 10.8 | 9.3  | 10.4 |
| Gm715  | 1.4  | 1.7  | 1.8  | 1.7  | 1.1  | 0.7  | 1.3  | 0.9  | 0.8  | 1.1  | 1.3  | 0.8  |
| Gm7168 | 0.1  | 0.0  | 0.0  | 0.0  | 0.0  | 0.0  | 0.0  | 0.0  | 0.0  | 0.0  | 0.2  | 0.1  |
| Gm7173 | 0.0  | 0.1  | 0.1  | 0.1  | 0.0  | 0.0  | 0.1  | 0.1  | 0.1  | 0.2  | 0.1  | 0.1  |
| Gm7334 | 37.2 | 44.3 | 39.4 | 39.8 | 32.8 | 43.4 | 41.7 | 25.0 | 33.6 | 53.5 | 49.8 | 41.3 |
| Gm7367 | 2.4  | 6.9  | 10.6 | 11.9 | 8.1  | 7.7  | 9.6  | 8.8  | 3.9  | 7.8  | 6.3  | 6.5  |
| Gm7444 | 0.0  | 0.1  | 0.2  | 0.1  | 0.1  | 0.1  | 0.0  | 0.1  | 0.0  | 0.1  | 0.1  | 0.0  |
| Gm7609 | 4.1  | 3.9  | 3.6  | 7.0  | 4.1  | 4.3  | 3.1  | 1.9  | 2.0  | 1.8  | 1.9  | 3.3  |
| Gm7694 | 0.2  | 0.3  | 0.3  | 0.2  | 0.2  | 0.2  | 0.2  | 0.1  | 0.2  | 0.3  | 0.2  | 0.1  |
| Gm7854 | 0.2  | 0.0  | 0.0  | 0.1  | 0.1  | 0.0  | 0.1  | 0.0  | 0.0  | 0.1  | 0.0  | 0.1  |
| Gm7904 | 0.1  | 0.0  | 0.0  | 0.0  | 0.0  | 0.0  | 0.0  | 0.0  | 0.0  | 0.0  | 0.0  | 0.0  |
| Gm7977 | 0.2  | 0.2  | 0.2  | 0.6  | 0.3  | 0.2  | 0.2  | 0.2  | 0.2  | 0.1  | 0.2  | 0.2  |
| Gm8096 | 0.0  | 0.0  | 0.0  | 0.1  | 0.0  | 0.0  | 0.1  | 0.0  | 0.0  | 0.0  | 0.1  | 0.0  |
| Gm8234 | 0.6  | 0.4  | 0.8  | 0.6  | 0.6  | 0.7  | 0.6  | 0.5  | 0.5  | 0.5  | 0.5  | 0.5  |
| Gm8300 | 0.0  | 0.0  | 0.0  | 0.0  | 0.0  | 0.0  | 0.0  | 0.0  | 0.0  | 0.0  | 0.0  | 0.0  |
| Gm8369 | 0.0  | 0.0  | 0.1  | 0.0  | 0.0  | 0.0  | 0.0  | 0.0  | 0.0  | 0.0  | 0.0  | 0.0  |
| Gm8579 | 0.0  | 0.0  | 0.0  | 0.0  | 0.1  | 0.1  | 0.0  | 0.0  | 0.0  | 0.1  | 0.0  | 0.1  |
| Gm8580 | 0.2  | 0.2  | 0.4  | 0.2  | 0.4  | 0.6  | 0.5  | 1.0  | 0.2  | 0.5  | 0.4  | 0.3  |
| Gm8615 | 0.4  | 0.3  | 0.3  | 0.4  | 0.5  | 0.5  | 0.3  | 0.3  | 0.2  | 0.4  | 0.3  | 0.3  |
| Gm8764 | 0.0  | 0.0  | 0.0  | 0.0  | 0.0  | 0.0  | 0.0  | 0.0  | 0.0  | 0.0  | 0.0  | 0.0  |
| Gm8765 | 0.0  | 0.0  | 0.0  | 0.0  | 0.0  | 0.0  | 0.0  | 0.0  | 0.0  | 0.0  | 0.0  | 0.0  |
| Gm8773 | 0.3  | 0.5  | 0.3  | 0.0  | 0.7  | 0.5  | 0.5  | 0.1  | 0.4  | 0.5  | 0.5  | 0.6  |
| Gm8787 | 0.1  | 0.1  | 0.0  | 0.0  | 0.0  | 0.1  | 0.0  | 0.0  | 0.2  | 0.1  | 0.0  | 0.0  |
| Gm8801 | 0.2  | 0.2  | 0.2  | 0.3  | 0.3  | 0.1  | 0.1  | 0.2  | 0.3  | 0.2  | 0.1  | 0.2  |
| Gm8817 | 0.0  | 0.0  | 0.0  | 0.0  | 0.1  | 0.3  | 0.0  | 0.2  | 0.1  | 0.1  | 0.0  | 0.1  |
| Gm8883 | 0.0  | 0.0  | 0.0  | 0.1  | 0.0  | 0.1  | 0.1  | 0.1  | 0.0  | 0.0  | 0.1  | 0.1  |
| Gm8898 | 4.7  | 4.0  | 4.1  | 5.5  | 4.4  | 5.0  | 3.8  | 4.3  | 3.6  | 4.5  | 5.1  | 4.8  |
| Gm8909 | 2.7  | 1.8  | 1.8  | 2.7  | 2.7  | 2.1  | 1.3  | 1.0  | 1.0  | 1.1  | 0.7  | 1.1  |
| Gm8979 | 3.9  | 2.0  | 2.6  | 6.0  | 3.7  | 1.8  | 2.7  | 1.2  | 2.2  | 1.2  | 2.3  | 3.4  |
| Gm8989 | 1.2  | 0.6  | 0.9  | 2.5  | 1.2  | 0.7  | 1.0  | 0.5  | 0.8  | 0.4  | 0.9  | 1.3  |
| Gm8994 | 0.0  | 0.1  | 0.1  | 0.1  | 0.1  | 0.1  | 0.0  | 0.0  | 0.1  | 0.1  | 0.1  | 0.1  |
| Gm9054 | 0.0  | 0.1  | 0.1  | 0.1  | 0.4  | 0.2  | 0.0  | 0.1  | 0.2  | 0.3  | 0.3  | 0.1  |
| Gm906  | 0.0  | 0.0  | 0.0  | 0.0  | 0.0  | 0.0  | 0.0  | 0.0  | 0.0  | 0.0  | 0.0  | 0.0  |
| Gm9079 | 0.6  | 0.5  | 0.7  | 1.0  | 0.8  | 0.7  | 0.9  | 0.7  | 1.1  | 0.9  | 0.8  | 1.1  |
| Gm9159 | 0.7  | 0.9  | 1.3  | 1.0  | 0.6  | 0.8  | 1.1  | 0.7  | 0.8  | 0.5  | 0.8  | 0.7  |
| Gm9199 | 0.1  | 0.1  | 0.1  | 0.4  | 0.1  | 0.1  | 0.1  | 0.1  | 0.0  | 0.1  | 0.2  | 0.3  |
| Gm9268 | 0.0  | 0.0  | 0.0  | 0.0  | 0.0  | 0.0  | 0.0  | 0.0  | 0.0  | 0.0  | 0.0  | 0.0  |
| Gm960  | 0.1  | 0.1  | 0.0  | 0.0  | 0.1  | 0.1  | 0.0  | 0.1  | 0.0  | 0.0  | 0.0  | 0.0  |
| Gm9696 | 0.3  | 0.7  | 1.2  | 0.6  | 0.5  | 0.2  | 0.4  | 0.2  | 0.1  | 0.2  | 0.1  | 0.3  |
| Gm9705 | 0.4  | 0.4  | 0.3  | 0.7  | 0.8  | 0.4  | 0.6  | 0.6  | 0.5  | 0.5  | 0.7  | 0.3  |
| Gm973  | 0.1  | 0.3  | 0.0  | 0.1  | 0.0  | 0.0  | 0.0  | 0.0  | 0.0  | 0.0  | 0.0  | 0.0  |
| Gm9767 | 0.1  | 0.1  | 0.3  | 0.3  | 0.3  | 0.1  | 1.0  | 0.3  | 0.7  | 0.7  | 0.3  | 0.3  |
| Gm9776 | 0.9  | 1.2  | 0.8  | 0.8  | 0.9  | 1.0  | 0.9  | 1.1  | 1.0  | 0.8  | 0.9  | 0.9  |
| Gm9833 | 1.1  | 1.3  | 1.8  | 0.9  | 1.3  | 1.1  | 1.8  | 1.4  | 1.4  | 1.4  | 1.7  | 1.9  |

Online Table 1

|        |        |        |        |       |        |        |       |        |        |        |        |        |
|--------|--------|--------|--------|-------|--------|--------|-------|--------|--------|--------|--------|--------|
| Gm9846 | 1299.3 | 1141.1 | 1048.5 | 912.1 | 1030.3 | 1124.1 | 918.1 | 1276.5 | 1166.6 | 1282.5 | 1163.1 | 1140.7 |
| Gm9855 | 4.6    | 5.9    | 4.8    | 3.6   | 5.0    | 3.1    | 5.4   | 6.1    | 6.5    | 4.8    | 5.7    | 3.7    |
| Gm9895 | 0.2    | 0.1    | 0.4    | 0.0   | 0.1    | 0.2    | 0.0   | 0.2    | 0.3    | 0.2    | 0.2    | 0.0    |
| Gm9897 | 1.3    | 1.3    | 1.2    | 1.6   | 1.1    | 1.4    | 1.0   | 1.2    | 1.1    | 1.6    | 1.7    | 1.2    |
| Gm9920 | 0.0    | 0.2    | 0.1    | 0.1   | 0.0    | 0.1    | 0.0   | 0.2    | 0.0    | 0.4    | 0.1    | 0.1    |
| Gm9958 | 0.6    | 0.5    | 0.7    | 0.5   | 0.5    | 0.9    | 0.7   | 0.6    | 0.3    | 0.3    | 0.3    | 0.5    |
| Gm996  | 0.0    | 0.0    | 0.0    | 0.0   | 0.0    | 0.0    | 0.0   | 0.0    | 0.0    | 0.1    | 0.0    | 0.0    |
| Gm9961 | 0.0    | 0.0    | 0.1    | 0.0   | 0.0    | 0.0    | 0.0   | 0.2    | 0.1    | 0.0    | 0.0    | 0.0    |
| Gm9992 | 0.0    | 0.1    | 0.0    | 0.0   | 0.0    | 0.0    | 0.0   | 0.0    | 0.1    | 0.1    | 0.0    | 0.0    |
| Gm9994 | 6.2    | 5.0    | 4.5    | 5.5   | 5.1    | 1.5    | 7.2   | 4.7    | 5.2    | 3.8    | 5.2    | 3.4    |
| Gmcl1  | 6.3    | 7.1    | 7.3    | 5.0   | 6.8    | 6.6    | 5.3   | 6.7    | 6.3    | 6.3    | 6.2    | 6.5    |
| Gmcls  | 14.4   | 13.9   | 12.3   | 10.4  | 10.8   | 9.7    | 11.2  | 8.8    | 11.0   | 10.9   | 11.5   | 10.3   |
| Gmeb1  | 1.7    | 1.7    | 1.6    | 1.7   | 1.7    | 1.5    | 1.8   | 2.0    | 1.9    | 1.8    | 1.9    | 1.9    |
| Gmeb2  | 2.4    | 2.6    | 2.5    | 2.2   | 2.5    | 2.4    | 3.2   | 2.9    | 2.7    | 2.8    | 2.3    | 2.6    |
| Gmfb   | 48.2   | 44.2   | 35.5   | 65.3  | 44.7   | 49.5   | 38.2  | 29.6   | 36.7   | 48.6   | 46.1   | 43.0   |
| Gmfg   | 1.0    | 0.3    | 0.2    | 4.1   | 6.1    | 0.1    | 1.3   | 0.1    | 0.2    | 0.8    | 0.2    | 0.8    |
| Gmip   | 4.6    | 4.4    | 3.6    | 5.8   | 7.2    | 3.4    | 4.2   | 3.4    | 3.9    | 4.4    | 3.8    | 4.0    |
| Gmnn   | 4.4    | 7.9    | 9.8    | 4.8   | 9.9    | 3.8    | 10.2  | 4.9    | 8.7    | 5.8    | 6.5    | 5.2    |
| Gmppa  | 31.6   | 30.9   | 32.3   | 31.8  | 28.3   | 29.9   | 30.1  | 33.9   | 30.6   | 27.3   | 31.8   | 29.6   |
| Gmppb  | 16.6   | 15.4   | 12.0   | 15.4  | 15.6   | 14.2   | 15.1  | 15.9   | 16.4   | 14.6   | 16.2   | 16.8   |
| Gmpr   | 4.7    | 4.7    | 2.8    | 6.1   | 3.5    | 6.0    | 2.3   | 2.4    | 2.6    | 4.4    | 3.2    | 2.8    |
| Gmpr2  | 18.5   | 15.1   | 13.2   | 18.2  | 17.7   | 18.2   | 16.3  | 13.9   | 15.1   | 15.1   | 15.9   | 16.7   |
| Gmps   | 13.3   | 14.1   | 11.8   | 9.3   | 11.7   | 11.8   | 11.5  | 10.0   | 12.5   | 14.7   | 13.3   | 13.1   |
| Gna11  | 27.9   | 24.6   | 22.7   | 28.8  | 24.1   | 28.6   | 27.5  | 23.7   | 24.5   | 23.6   | 24.8   | 21.1   |
| Gna12  | 34.2   | 35.9   | 29.8   | 36.1  | 35.0   | 36.8   | 39.8  | 30.6   | 35.4   | 30.0   | 35.6   | 30.4   |
| Gna13  | 13.9   | 14.1   | 11.1   | 15.7  | 15.4   | 15.8   | 11.4  | 10.6   | 12.6   | 11.5   | 11.2   | 11.0   |
| Gna14  | 0.1    | 0.1    | 0.1    | 0.1   | 0.1    | 0.2    | 0.1   | 0.1    | 0.0    | 0.1    | 0.0    | 0.1    |
| Gna15  | 0.4    | 0.4    | 0.3    | 1.3   | 2.3    | 0.2    | 0.5   | 0.1    | 0.2    | 0.3    | 0.3    | 0.3    |
| Gnai1  | 5.2    | 5.1    | 5.7    | 5.0   | 5.2    | 3.0    | 6.6   | 4.4    | 7.2    | 6.6    | 6.5    | 7.3    |
| Gnai2  | 168.9  | 142.6  | 138.9  | 217.2 | 175.9  | 185.2  | 177.6 | 151.8  | 148.6  | 139.9  | 159.1  | 148.3  |
| Gnai3  | 52.5   | 55.9   | 50.6   | 53.1  | 52.1   | 53.1   | 49.3  | 49.3   | 56.3   | 50.9   | 58.4   | 56.4   |
| Gnal   | 0.7    | 0.6    | 0.6    | 0.7   | 0.5    | 0.7    | 0.7   | 0.5    | 0.6    | 0.6    | 0.4    | 0.7    |
| Gnao1  | 1.1    | 1.9    | 2.6    | 1.2   | 1.6    | 1.2    | 2.5   | 2.5    | 2.8    | 1.3    | 1.6    | 1.8    |
| Gnaq   | 21.6   | 22.0   | 20.9   | 24.8  | 22.5   | 21.1   | 24.2  | 18.2   | 21.0   | 19.2   | 24.3   | 25.8   |
| Gnas   | 511.8  | 472.8  | 434.1  | 562.9 | 451.8  | 586.6  | 505.8 | 516.4  | 474.5  | 423.6  | 529.3  | 442.0  |
| Gnat1  | 0.0    | 0.0    | 0.0    | 0.0   | 0.0    | 0.0    | 0.0   | 0.0    | 0.0    | 0.0    | 0.0    | 0.0    |
| Gnat2  | 1.8    | 0.9    | 0.7    | 1.9   | 0.9    | 1.5    | 0.9   | 0.6    | 0.5    | 1.3    | 1.4    | 0.9    |
| Gnaz   | 0.6    | 0.8    | 0.5    | 1.1   | 0.4    | 1.2    | 0.4   | 0.5    | 0.3    | 0.2    | 0.4    | 0.2    |
| Gnb1   | 100.1  | 102.2  | 87.8   | 120.3 | 105.9  | 112.4  | 111.8 | 96.5   | 99.2   | 94.7   | 110.4  | 99.6   |
| Gnb1l  | 0.8    | 0.8    | 0.7    | 0.7   | 0.5    | 0.7    | 0.4   | 0.5    | 0.4    | 0.7    | 0.5    | 0.7    |
| Gnb2   | 80.9   | 85.2   | 78.1   | 75.9  | 97.9   | 76.3   | 100.1 | 93.0   | 105.8  | 96.0   | 91.9   | 82.4   |
| Gnb2l1 | 697.0  | 585.2  | 514.7  | 488.8 | 563.6  | 574.7  | 531.0 | 686.0  | 605.8  | 640.6  | 636.3  | 568.2  |
| Gnb3   | 0.0    | 0.0    | 0.0    | 0.0   | 0.1    | 0.0    | 0.0   | 0.0    | 0.0    | 0.1    | 0.1    | 0.1    |
| Gnb4   | 3.4    | 2.2    | 2.7    | 4.0   | 3.3    | 3.7    | 2.7   | 2.4    | 2.8    | 3.0    | 2.3    | 2.6    |
| Gnb5   | 9.5    | 8.9    | 7.2    | 9.5   | 7.4    | 10.9   | 7.5   | 7.3    | 6.6    | 7.0    | 6.4    | 6.6    |
| Gne    | 16.8   | 18.7   | 16.8   | 15.2  | 16.0   | 17.2   | 17.9  | 15.0   | 15.4   | 15.8   | 16.6   | 16.8   |
| Gng10  | 41.2   | 41.3   | 35.3   | 49.4  | 40.0   | 53.9   | 38.6  | 41.1   | 36.1   | 30.8   | 45.4   | 41.0   |
| Gng11  | 20.9   | 14.6   | 12.8   | 19.4  | 17.6   | 24.7   | 16.0  | 14.9   | 16.3   | 17.9   | 14.5   | 18.9   |
| Gng12  | 52.8   | 49.1   | 51.2   | 56.6  | 52.6   | 51.4   | 49.1  | 46.6   | 46.4   | 47.4   | 57.0   | 54.1   |
| Gng13  | 0.9    | 1.0    | 1.7    | 0.0   | 0.2    | 1.0    | 0.7   | 0.3    | 0.1    | 0.8    | 0.0    | 0.1    |
| Gng2   | 1.6    | 1.0    | 1.2    | 5.6   | 5.8    | 2.9    | 1.3   | 0.7    | 0.7    | 0.6    | 0.7    | 0.6    |
| Gng3   | 0.3    | 0.1    | 0.0    | 0.1   | 0.1    | 0.2    | 0.2   | 0.2    | 0.1    | 0.2    | 0.1    | 0.1    |
| Gng4   | 0.1    | 0.2    | 0.1    | 0.2   | 0.1    | 0.5    | 0.2   | 0.2    | 0.1    | 0.1    | 0.1    | 0.2    |
| Gng5   | 120.0  | 138.1  | 166.8  | 212.1 | 184.7  | 195.6  | 167.4 | 187.3  | 189.5  | 212.0  | 230.9  | 197.5  |
| Gng7   | 0.3    | 0.4    | 0.4    | 0.1   | 0.2    | 0.2    | 0.2   | 0.2    | 0.3    | 0.3    | 0.3    | 0.3    |
| Gng8   | 5.4    | 8.5    | 19.1   | 7.1   | 8.2    | 6.6    | 11.2  | 16.9   | 11.3   | 5.6    | 7.0    | 7.6    |
| Gngt2  | 3.5    | 2.0    | 2.2    | 13.7  | 19.5   | 0.8    | 3.6   | 2.1    | 2.6    | 3.1    | 2.7    | 3.3    |

Online Table 1

|          |       |      |      |       |       |       |      |      |      |      |      |      |
|----------|-------|------|------|-------|-------|-------|------|------|------|------|------|------|
| Gnl1     | 18.3  | 20.1 | 17.5 | 19.7  | 16.1  | 22.6  | 17.8 | 15.6 | 14.8 | 14.0 | 15.7 | 14.8 |
| Gnl2     | 21.2  | 16.1 | 17.3 | 21.6  | 17.1  | 18.0  | 19.6 | 17.9 | 16.6 | 32.9 | 26.3 | 25.1 |
| Gnl3     | 29.6  | 24.0 | 18.5 | 31.3  | 22.9  | 26.9  | 21.1 | 17.9 | 17.8 | 24.2 | 25.9 | 25.1 |
| Gnl3l    | 19.8  | 17.3 | 17.2 | 19.1  | 16.6  | 18.9  | 18.2 | 16.6 | 15.4 | 19.2 | 20.1 | 18.7 |
| Gnpat    | 15.4  | 14.8 | 12.9 | 11.1  | 14.4  | 14.6  | 12.7 | 15.5 | 14.9 | 14.9 | 15.2 | 13.8 |
| Gnpda1   | 8.0   | 6.1  | 5.0  | 8.6   | 7.6   | 10.3  | 4.3  | 5.8  | 4.5  | 7.7  | 5.9  | 6.6  |
| Gnpda2   | 19.3  | 17.8 | 17.7 | 23.3  | 19.8  | 25.7  | 17.3 | 17.4 | 15.0 | 15.8 | 21.7 | 20.5 |
| Gnpnat1  | 13.5  | 14.9 | 15.3 | 15.9  | 12.7  | 15.3  | 12.0 | 12.9 | 14.0 | 14.9 | 16.1 | 15.9 |
| Gnptab   | 9.2   | 7.8  | 11.6 | 8.0   | 11.3  | 8.2   | 12.0 | 12.5 | 9.0  | 11.9 | 12.2 | 11.6 |
| Gnptg    | 15.1  | 10.3 | 10.4 | 17.5  | 12.3  | 17.1  | 10.2 | 11.0 | 9.7  | 12.5 | 10.8 | 11.2 |
| Gnrh1    | 0.4   | 0.1  | 0.2  | 0.3   | 0.2   | 0.6   | 0.1  | 0.4  | 0.3  | 0.1  | 0.1  | 0.1  |
| Gns      | 103.3 | 72.9 | 64.6 | 124.1 | 102.9 | 114.6 | 73.8 | 60.7 | 62.1 | 76.1 | 68.7 | 80.3 |
| Golga1   | 6.4   | 6.2  | 6.3  | 5.4   | 5.3   | 5.0   | 6.0  | 6.2  | 5.9  | 5.6  | 7.2  | 6.3  |
| Golga2   | 25.6  | 25.5 | 25.3 | 25.6  | 22.8  | 25.6  | 30.1 | 27.8 | 27.3 | 22.5 | 28.3 | 27.1 |
| Golga3   | 24.7  | 23.4 | 22.6 | 24.3  | 21.3  | 23.2  | 23.8 | 21.2 | 21.3 | 20.4 | 26.2 | 26.1 |
| Golga4   | 34.7  | 28.4 | 24.1 | 44.1  | 27.9  | 42.7  | 26.4 | 19.9 | 19.4 | 24.2 | 29.3 | 28.4 |
| Golga5   | 28.5  | 27.4 | 26.6 | 29.7  | 25.2  | 26.3  | 27.2 | 27.5 | 25.1 | 23.9 | 30.5 | 29.7 |
| Golga7   | 51.6  | 53.5 | 60.0 | 54.9  | 54.0  | 52.0  | 52.3 | 61.3 | 66.4 | 64.3 | 65.3 | 65.2 |
| Golgb1   | 39.1  | 35.8 | 33.7 | 45.0  | 32.8  | 44.4  | 34.8 | 28.9 | 26.9 | 31.0 | 38.9 | 38.4 |
| Golim4   | 72.8  | 68.4 | 71.1 | 88.0  | 59.0  | 79.5  | 68.6 | 48.9 | 50.4 | 58.4 | 69.4 | 79.4 |
| Golm1    | 9.7   | 9.1  | 10.1 | 11.4  | 12.9  | 8.0   | 10.7 | 11.1 | 9.7  | 11.7 | 9.6  | 9.8  |
| Golph3   | 51.6  | 51.5 | 53.0 | 53.1  | 49.2  | 52.6  | 51.6 | 51.6 | 49.7 | 52.5 | 59.8 | 61.5 |
| Golph3l  | 11.0  | 11.4 | 11.7 | 13.7  | 10.0  | 11.8  | 8.9  | 10.8 | 9.5  | 10.8 | 10.8 | 12.5 |
| Golt1b   | 32.4  | 30.5 | 24.1 | 26.5  | 31.5  | 30.8  | 32.1 | 28.7 | 35.8 | 34.7 | 37.5 | 31.1 |
| Gon4l    | 5.5   | 6.7  | 6.6  | 5.7   | 5.9   | 6.1   | 6.0  | 6.7  | 5.6  | 6.0  | 6.1  | 6.1  |
| Gopc     | 7.4   | 8.9  | 10.2 | 7.3   | 8.6   | 7.0   | 10.1 | 8.6  | 8.7  | 8.3  | 8.9  | 9.6  |
| Gorab    | 4.9   | 5.6  | 5.5  | 5.4   | 4.7   | 5.7   | 5.7  | 5.4  | 5.4  | 5.3  | 7.3  | 6.4  |
| Gorasp1  | 8.7   | 8.1  | 7.5  | 10.4  | 8.8   | 10.0  | 8.3  | 7.3  | 8.1  | 9.3  | 8.4  | 7.9  |
| Gorasp2  | 58.2  | 56.9 | 54.7 | 68.0  | 56.1  | 57.2  | 69.3 | 57.7 | 59.0 | 57.1 | 62.0 | 65.4 |
| Gosr1    | 10.5  | 11.8 | 11.6 | 12.0  | 10.9  | 10.3  | 11.1 | 12.1 | 11.4 | 11.5 | 11.5 | 12.1 |
| Gosr2    | 47.3  | 46.0 | 41.9 | 50.0  | 47.3  | 42.6  | 43.8 | 51.2 | 44.9 | 43.9 | 47.3 | 46.7 |
| Got1     | 16.6  | 13.8 | 10.3 | 18.5  | 13.7  | 19.7  | 15.3 | 15.8 | 14.3 | 15.2 | 17.1 | 12.5 |
| Got1l1   | 0.2   | 0.1  | 0.3  | 0.1   | 0.1   | 0.0   | 0.0  | 0.1  | 0.0  | 0.2  | 0.2  | 0.0  |
| Got2     | 51.8  | 43.0 | 36.0 | 53.6  | 46.1  | 48.2  | 41.9 | 38.8 | 32.6 | 45.3 | 45.7 | 37.9 |
| Gp1ba    | 0.5   | 0.5  | 0.4  | 0.4   | 0.4   | 0.8   | 0.4  | 0.3  | 0.3  | 0.6  | 0.5  | 0.3  |
| Gp1bb    | 0.7   | 0.6  | 0.8  | 0.6   | 0.7   | 0.6   | 1.3  | 1.5  | 1.8  | 0.7  | 1.1  | 0.8  |
| Gp49a    | 2.9   | 0.1  | 0.1  | 36.4  | 51.4  | 0.0   | 4.4  | 1.0  | 0.6  | 2.2  | 1.2  | 2.5  |
| Gp5      | 0.0   | 0.1  | 0.0  | 0.0   | 0.0   | 0.1   | 0.1  | 0.0  | 0.0  | 0.1  | 0.0  | 0.0  |
| Gpaa1    | 10.7  | 11.8 | 8.9  | 9.9   | 10.9  | 10.8  | 11.8 | 12.8 | 11.9 | 9.8  | 9.0  | 7.8  |
| Gpam     | 12.0  | 22.9 | 45.5 | 10.1  | 19.0  | 9.8   | 13.6 | 23.7 | 14.1 | 12.8 | 11.3 | 14.4 |
| Gpank1   | 4.9   | 5.8  | 5.5  | 6.7   | 4.6   | 6.9   | 5.2  | 5.3  | 4.9  | 4.5  | 5.3  | 4.7  |
| Gpat2    | 0.1   | 0.0  | 0.1  | 0.1   | 0.1   | 0.3   | 0.2  | 0.0  | 0.1  | 0.1  | 0.1  | 0.1  |
| Gpatch1  | 5.9   | 5.5  | 6.5  | 5.8   | 4.5   | 5.7   | 6.2  | 5.9  | 4.3  | 5.2  | 5.9  | 6.4  |
| Gpatch11 | 3.8   | 3.4  | 3.8  | 3.8   | 2.8   | 3.5   | 3.7  | 3.8  | 3.5  | 3.9  | 4.5  | 4.2  |
| Gpatch2  | 4.7   | 4.4  | 4.2  | 4.3   | 3.9   | 4.6   | 4.5  | 3.9  | 3.8  | 4.2  | 4.8  | 4.3  |
| Gpatch2l | 6.0   | 6.3  | 5.4  | 6.2   | 5.8   | 6.1   | 6.4  | 5.4  | 5.5  | 5.6  | 5.8  | 6.1  |
| Gpatch3  | 2.5   | 2.0  | 2.0  | 2.8   | 2.9   | 2.7   | 2.2  | 2.4  | 2.0  | 2.7  | 2.2  | 2.5  |
| Gpatch4  | 9.3   | 6.1  | 6.7  | 14.6  | 7.4   | 9.1   | 9.2  | 6.2  | 3.8  | 5.5  | 8.1  | 7.1  |
| Gpatch8  | 4.8   | 5.4  | 6.1  | 5.3   | 4.8   | 4.4   | 5.5  | 5.3  | 4.9  | 4.6  | 4.8  | 4.9  |
| Gpbar1   | 0.1   | 0.1  | 0.5  | 0.4   | 0.1   | 0.1   | 0.4  | 0.5  | 0.3  | 0.3  | 0.3  | 0.1  |
| Gpbp1    | 19.6  | 21.0 | 23.1 | 21.8  | 20.7  | 22.2  | 17.5 | 19.7 | 19.9 | 22.9 | 24.5 | 23.8 |
| Gpbp1l1  | 12.2  | 12.9 | 13.2 | 14.8  | 12.7  | 13.4  | 11.4 | 13.1 | 11.9 | 15.8 | 14.4 | 14.0 |
| Gpc1     | 5.1   | 3.6  | 3.1  | 4.3   | 3.3   | 5.9   | 4.7  | 6.2  | 5.0  | 6.5  | 6.2  | 6.2  |
| Gpc2     | 1.0   | 1.2  | 1.0  | 0.8   | 0.7   | 1.0   | 0.8  | 1.1  | 1.3  | 1.6  | 1.0  | 0.7  |
| Gpc3     | 0.3   | 0.6  | 2.7  | 0.1   | 0.4   | 0.1   | 0.9  | 2.6  | 4.3  | 16.6 | 8.0  | 6.7  |
| Gpc4     | 55.0  | 47.8 | 39.7 | 48.6  | 44.7  | 40.9  | 52.5 | 46.1 | 59.2 | 42.3 | 53.7 | 39.1 |
| Gpc5     | 0.0   | 0.0  | 0.1  | 0.0   | 0.0   | 0.0   | 0.0  | 0.0  | 0.0  | 0.0  | 0.0  | 0.0  |

Online Table 1

|            |       |      |      |       |       |       |       |       |      |       |       |       |
|------------|-------|------|------|-------|-------|-------|-------|-------|------|-------|-------|-------|
| Gpc6       | 5.8   | 7.3  | 10.7 | 5.2   | 8.7   | 5.4   | 10.2  | 13.9  | 12.2 | 7.9   | 9.0   | 9.7   |
| Gpcpd1     | 6.8   | 11.8 | 13.3 | 6.2   | 7.1   | 6.6   | 6.0   | 10.0  | 6.6  | 6.8   | 6.9   | 8.0   |
| Gpd1       | 0.2   | 0.2  | 0.1  | 0.2   | 0.1   | 0.2   | 0.1   | 0.2   | 0.2  | 0.1   | 0.2   | 0.1   |
| Gpd1l      | 8.4   | 8.3  | 8.2  | 6.8   | 7.2   | 7.5   | 7.2   | 7.4   | 8.2  | 8.7   | 8.6   | 7.9   |
| Gpd2       | 5.4   | 5.1  | 5.0  | 4.9   | 4.6   | 5.0   | 4.9   | 4.7   | 4.0  | 5.0   | 5.6   | 5.2   |
| Gpha2      | 0.3   | 0.2  | 0.0  | 0.0   | 0.1   | 0.3   | 0.2   | 0.0   | 0.4  | 0.2   | 0.3   | 0.4   |
| Gphn       | 2.6   | 3.3  | 4.5  | 2.0   | 2.6   | 2.1   | 2.4   | 4.1   | 2.6  | 3.2   | 2.9   | 3.2   |
| Gpi1       | 107.4 | 92.8 | 83.7 | 126.5 | 105.4 | 116.3 | 104.0 | 102.1 | 93.1 | 106.7 | 105.2 | 100.3 |
| Gpihbp1    | 0.0   | 0.1  | 0.3  | 0.0   | 0.0   | 0.0   | 0.3   | 1.0   | 0.6  | 0.0   | 0.0   | 0.0   |
| Gpkow      | 7.9   | 9.5  | 10.3 | 11.0  | 8.4   | 10.5  | 8.4   | 7.7   | 7.1  | 9.1   | 8.9   | 9.1   |
| Gpld1      | 2.6   | 3.0  | 2.3  | 2.8   | 2.5   | 2.4   | 2.4   | 2.2   | 2.3  | 1.9   | 2.1   | 2.4   |
| Gpm6a      | 16.2  | 5.9  | 2.9  | 3.8   | 0.8   | 2.0   | 0.5   | 2.5   | 4.2  | 70.1  | 33.5  | 16.9  |
| Gpm6b      | 10.7  | 20.9 | 36.9 | 14.7  | 24.2  | 12.0  | 16.7  | 26.1  | 16.4 | 9.9   | 9.2   | 15.3  |
| Gpn1       | 11.7  | 10.1 | 8.3  | 11.5  | 9.7   | 11.4  | 9.0   | 9.5   | 9.1  | 10.3  | 10.4  | 9.7   |
| Gpn2       | 5.2   | 4.3  | 4.4  | 6.1   | 6.7   | 4.3   | 6.5   | 6.8   | 6.8  | 5.6   | 6.1   | 5.3   |
| Gpn3       | 7.9   | 8.9  | 8.7  | 8.7   | 7.3   | 8.0   | 7.7   | 8.6   | 7.1  | 8.9   | 8.2   | 7.2   |
| Gpnmb      | 69.5  | 28.5 | 20.4 | 116.5 | 37.8  | 60.9  | 11.1  | 13.1  | 8.2  | 17.0  | 18.3  | 23.3  |
| Gpr1       | 0.0   | 0.2  | 0.0  | 0.0   | 0.1   | 0.0   | 0.1   | 0.1   | 0.1  | 0.1   | 0.0   | 0.0   |
| Gpr107     | 24.4  | 22.7 | 21.2 | 25.2  | 21.9  | 24.8  | 20.8  | 21.2  | 22.7 | 21.6  | 21.3  | 21.8  |
| Gpr108     | 20.9  | 21.3 | 18.9 | 24.3  | 20.6  | 25.1  | 22.5  | 21.2  | 20.4 | 20.8  | 20.2  | 19.5  |
| Gpr110     | 0.0   | 0.0  | 0.0  | 0.0   | 0.0   | 0.0   | 0.0   | 0.0   | 0.0  | 0.0   | 0.0   | 0.0   |
| Gpr111     | 0.0   | 0.0  | 0.0  | 0.0   | 0.0   | 0.0   | 0.0   | 0.0   | 0.0  | 0.0   | 0.1   | 0.0   |
| Gpr115     | 0.0   | 0.0  | 0.1  | 0.0   | 0.0   | 0.0   | 0.0   | 0.0   | 0.0  | 0.1   | 0.0   | 0.1   |
| Gpr116     | 1.3   | 0.3  | 0.6  | 0.6   | 0.4   | 0.2   | 0.7   | 1.0   | 0.8  | 0.4   | 0.5   | 0.3   |
| Gpr123     | 0.1   | 0.1  | 0.1  | 0.1   | 0.1   | 0.1   | 0.1   | 0.0   | 0.0  | 0.1   | 0.0   | 0.0   |
| Gpr124     | 1.1   | 1.5  | 2.5  | 0.9   | 1.2   | 1.2   | 2.5   | 3.9   | 4.3  | 3.3   | 2.5   | 2.2   |
| Gpr125     | 14.7  | 11.2 | 9.1  | 13.7  | 9.4   | 12.9  | 12.4  | 9.0   | 11.1 | 12.9  | 12.7  | 11.2  |
| Gpr126     | 1.8   | 0.7  | 0.8  | 2.1   | 3.3   | 1.2   | 1.7   | 1.4   | 1.9  | 1.6   | 1.3   | 1.7   |
| Gpr128     | 0.0   | 0.0  | 0.0  | 0.0   | 0.0   | 0.0   | 0.0   | 0.0   | 0.0  | 0.0   | 0.0   | 0.0   |
| Gpr132     | 0.0   | 0.0  | 0.1  | 0.2   | 0.7   | 0.1   | 0.1   | 0.0   | 0.0  | 0.1   | 0.0   | 0.0   |
| Gpr133     | 0.9   | 3.1  | 6.5  | 0.6   | 1.3   | 0.5   | 3.3   | 16.6  | 10.6 | 9.3   | 4.9   | 5.8   |
| Gpr135     | 0.2   | 0.1  | 0.2  | 0.1   | 0.2   | 0.2   | 0.3   | 0.3   | 0.2  | 0.3   | 0.1   | 0.4   |
| Gpr137     | 12.5  | 11.9 | 11.9 | 13.9  | 12.7  | 15.2  | 12.1  | 13.8  | 13.4 | 12.5  | 9.9   | 9.1   |
| Gpr137b    | 12.2  | 9.4  | 8.5  | 18.1  | 14.7  | 16.8  | 11.8  | 11.0  | 9.3  | 7.7   | 9.3   | 8.5   |
| Gpr137b-ps | 12.6  | 10.2 | 9.3  | 17.2  | 15.5  | 15.4  | 12.7  | 11.8  | 9.7  | 7.9   | 9.3   | 8.5   |
| Gpr137c    | 0.6   | 0.5  | 0.3  | 0.3   | 0.6   | 0.6   | 0.5   | 0.2   | 0.4  | 0.5   | 0.5   | 0.4   |
| Gpr141     | 0.6   | 0.4  | 0.1  | 1.5   | 0.4   | 0.8   | 0.4   | 0.1   | 0.4  | 0.1   | 0.3   | 0.1   |
| Gpr143     | 0.4   | 0.1  | 0.1  | 0.2   | 0.1   | 0.1   | 0.0   | 0.0   | 0.0  | 0.0   | 0.0   | 0.1   |
| Gpr146     | 2.0   | 1.9  | 2.0  | 1.7   | 1.8   | 1.8   | 1.3   | 1.6   | 1.3  | 2.1   | 1.6   | 1.7   |
| Gpr151     | 0.1   | 0.1  | 0.3  | 0.1   | 0.3   | 0.0   | 0.2   | 0.1   | 0.2  | 0.2   | 0.1   | 0.2   |
| Gpr152     | 0.0   | 0.0  | 0.0  | 0.0   | 0.0   | 0.0   | 0.0   | 0.0   | 0.0  | 0.1   | 0.0   | 0.0   |
| Gpr153     | 4.7   | 4.4  | 5.6  | 3.0   | 5.8   | 4.3   | 10.5  | 10.2  | 10.2 | 7.9   | 7.7   | 7.3   |
| Gpr155     | 0.6   | 1.0  | 1.2  | 1.0   | 0.9   | 0.8   | 0.6   | 0.9   | 0.5  | 0.5   | 0.4   | 0.6   |
| Gpr156     | 0.1   | 0.1  | 0.2  | 0.1   | 0.1   | 0.1   | 0.1   | 0.2   | 0.2  | 0.1   | 0.1   | 0.1   |
| Gpr157     | 0.5   | 0.6  | 0.5  | 0.4   | 0.4   | 0.4   | 0.4   | 0.5   | 0.5  | 0.3   | 0.5   | 0.4   |
| Gpr160     | 0.1   | 0.1  | 0.1  | 0.0   | 0.2   | 0.2   | 0.1   | 0.1   | 0.0  | 0.1   | 0.0   | 0.2   |
| Gpr161     | 3.6   | 3.4  | 3.3  | 3.7   | 3.4   | 4.7   | 3.9   | 4.1   | 3.5  | 2.6   | 3.7   | 2.7   |
| Gpr162     | 0.8   | 0.7  | 0.9  | 0.9   | 1.0   | 1.0   | 0.4   | 0.9   | 0.8  | 0.4   | 0.6   | 0.8   |
| Gpr165     | 0.0   | 0.0  | 0.0  | 0.0   | 0.0   | 0.0   | 0.0   | 0.0   | 0.0  | 0.0   | 0.0   | 0.0   |
| Gpr17      | 0.1   | 0.2  | 0.1  | 0.1   | 0.1   | 0.1   | 0.3   | 0.1   | 0.2  | 0.1   | 0.1   | 0.2   |
| Gpr173     | 0.2   | 0.3  | 0.3  | 0.1   | 0.2   | 0.2   | 0.2   | 0.2   | 0.2  | 0.1   | 0.0   | 0.1   |
| Gpr176     | 15.8  | 16.0 | 12.9 | 19.1  | 18.2  | 18.2  | 18.8  | 14.7  | 21.1 | 18.0  | 15.8  | 17.6  |
| Gpr179     | 0.0   | 0.0  | 0.0  | 0.0   | 0.0   | 0.0   | 0.0   | 0.0   | 0.0  | 0.0   | 0.0   | 0.0   |
| Gpr18      | 0.1   | 0.0  | 0.0  | 0.5   | 0.9   | 0.1   | 0.2   | 0.0   | 0.4  | 0.1   | 0.0   | 0.0   |
| Gpr180     | 15.7  | 14.7 | 12.7 | 13.5  | 13.9  | 13.9  | 16.2  | 15.2  | 15.1 | 16.3  | 15.2  | 15.2  |
| Gpr182     | 0.3   | 0.1  | 0.2  | 0.2   | 0.2   | 0.4   | 0.3   | 0.1   | 0.1  | 0.1   | 0.1   | 0.1   |
| Gpr183     | 0.0   | 0.0  | 0.1  | 0.2   | 0.8   | 0.0   | 0.1   | 0.0   | 0.0  | 0.1   | 0.0   | 0.1   |

Online Table 1

|         |       |       |       |       |       |       |       |       |       |       |       |       |
|---------|-------|-------|-------|-------|-------|-------|-------|-------|-------|-------|-------|-------|
| Gpr19   | 1.6   | 1.7   | 1.9   | 1.4   | 1.2   | 2.1   | 1.7   | 1.5   | 1.4   | 1.2   | 1.6   | 1.4   |
| Gpr20   | 0.0   | 0.1   | 0.0   | 0.0   | 0.0   | 0.0   | 0.0   | 0.0   | 0.0   | 0.0   | 0.1   | 0.0   |
| Gpr21   | 0.1   | 0.2   | 0.2   | 0.1   | 0.2   | 0.2   | 0.2   | 0.2   | 0.1   | 0.2   | 0.1   | 0.2   |
| Gpr22   | 0.1   | 0.0   | 0.1   | 0.0   | 0.0   | 0.0   | 0.0   | 0.1   | 0.0   | 0.0   | 0.0   | 0.1   |
| Gpr27   | 0.4   | 0.2   | 0.1   | 0.5   | 0.2   | 0.5   | 0.2   | 0.1   | 0.2   | 0.1   | 0.1   | 0.3   |
| Gpr3    | 0.0   | 0.0   | 0.0   | 0.0   | 0.0   | 0.0   | 0.0   | 0.1   | 0.0   | 0.1   | 0.1   | 0.0   |
| Gpr30   | 0.0   | 0.1   | 0.0   | 0.0   | 0.1   | 0.0   | 0.0   | 0.1   | 0.0   | 0.2   | 0.1   | 0.0   |
| Gpr31b  | 0.1   | 0.1   | 0.0   | 0.6   | 2.0   | 0.1   | 0.6   | 0.0   | 0.1   | 0.2   | 0.1   | 0.0   |
| Gpr34   | 0.0   | 0.0   | 0.0   | 0.0   | 0.1   | 0.0   | 0.1   | 0.0   | 0.0   | 0.1   | 0.1   | 0.0   |
| Gpr35   | 1.7   | 0.9   | 0.3   | 3.1   | 2.1   | 3.7   | 2.3   | 0.4   | 0.7   | 0.8   | 0.9   | 1.0   |
| Gpr37   | 0.0   | 0.0   | 0.0   | 0.0   | 0.0   | 0.0   | 0.0   | 0.1   | 0.0   | 0.0   | 0.1   | 0.0   |
| Gpr39   | 25.6  | 20.8  | 20.4  | 23.7  | 21.2  | 19.6  | 32.3  | 22.1  | 30.2  | 35.3  | 31.9  | 38.2  |
| Gpr4    | 0.2   | 0.3   | 0.4   | 0.1   | 0.3   | 0.3   | 0.3   | 0.5   | 0.1   | 0.3   | 0.1   | 0.2   |
| Gpr44   | 0.0   | 0.1   | 0.0   | 0.0   | 0.0   | 0.1   | 0.0   | 0.1   | 0.1   | 0.1   | 0.0   | 0.0   |
| Gpr45   | 0.1   | 0.0   | 0.0   | 0.0   | 0.0   | 0.1   | 0.0   | 0.0   | 0.1   | 0.0   | 0.0   | 0.0   |
| Gpr52   | 0.1   | 0.0   | 0.1   | 0.1   | 0.1   | 0.0   | 0.0   | 0.1   | 0.1   | 0.1   | 0.1   | 0.1   |
| Gpr55   | 0.0   | 0.0   | 0.0   | 0.1   | 0.0   | 0.0   | 0.0   | 0.0   | 0.0   | 0.0   | 0.0   | 0.0   |
| Gpr56   | 0.2   | 0.2   | 0.2   | 0.2   | 0.1   | 0.1   | 0.3   | 0.3   | 0.3   | 1.0   | 0.5   | 0.3   |
| Gpr61   | 0.0   | 0.1   | 0.1   | 0.2   | 0.0   | 0.1   | 0.0   | 0.0   | 0.0   | 0.0   | 0.0   | 0.1   |
| Gpr62   | 0.1   | 0.2   | 0.1   | 0.1   | 0.1   | 0.1   | 0.1   | 0.1   | 0.0   | 0.1   | 0.2   | 0.1   |
| Gpr63   | 0.2   | 0.3   | 0.2   | 0.1   | 0.2   | 0.4   | 0.1   | 0.5   | 0.3   | 0.4   | 0.3   | 0.4   |
| Gpr64   | 1.3   | 1.0   | 1.4   | 1.2   | 1.3   | 1.1   | 1.7   | 1.2   | 1.2   | 1.2   | 1.2   | 1.5   |
| Gpr65   | 0.1   | 0.0   | 0.0   | 1.3   | 1.4   | 0.0   | 0.1   | 0.0   | 0.0   | 0.1   | 0.1   | 0.1   |
| Gpr68   | 0.7   | 0.5   | 0.2   | 0.6   | 0.6   | 0.5   | 0.4   | 0.4   | 0.3   | 1.0   | 0.7   | 0.5   |
| Gpr75   | 0.4   | 0.5   | 0.3   | 0.4   | 0.3   | 0.4   | 0.2   | 0.2   | 0.1   | 0.3   | 0.2   | 0.3   |
| Gpr81   | 0.0   | 0.0   | 0.0   | 0.0   | 0.0   | 0.0   | 0.0   | 0.0   | 0.1   | 0.1   | 0.0   | 0.1   |
| Gpr82   | 0.0   | 0.1   | 0.0   | 0.0   | 0.1   | 0.0   | 0.0   | 0.0   | 0.1   | 0.0   | 0.0   | 0.0   |
| Gpr83   | 0.0   | 0.0   | 0.0   | 0.0   | 0.0   | 0.0   | 0.0   | 0.0   | 0.0   | 0.0   | 0.0   | 0.0   |
| Gpr84   | 0.1   | 0.1   | 0.0   | 1.6   | 3.5   | 0.0   | 0.7   | 0.0   | 0.2   | 0.3   | 0.0   | 0.3   |
| Gpr85   | 0.3   | 0.1   | 0.2   | 0.4   | 0.6   | 0.4   | 0.6   | 0.2   | 0.2   | 0.6   | 0.2   | 0.5   |
| Gpr88   | 0.2   | 0.3   | 0.9   | 0.1   | 0.2   | 0.1   | 0.2   | 1.3   | 1.2   | 4.3   | 1.8   | 2.1   |
| Gpr89   | 11.4  | 11.8  | 9.7   | 11.3  | 10.0  | 11.9  | 9.7   | 11.2  | 9.3   | 10.4  | 11.0  | 9.2   |
| Gpr97   | 0.0   | 0.0   | 0.0   | 0.0   | 0.0   | 0.1   | 0.0   | 0.0   | 0.0   | 0.0   | 0.0   | 0.0   |
| Gpr98   | 0.0   | 0.0   | 0.0   | 0.0   | 0.0   | 0.0   | 0.0   | 0.0   | 0.0   | 0.0   | 0.0   | 0.0   |
| Gprasp1 | 6.5   | 7.9   | 9.3   | 5.9   | 5.0   | 8.0   | 5.2   | 5.8   | 6.2   | 7.0   | 5.9   | 7.2   |
| Gprasp2 | 0.5   | 0.8   | 1.1   | 0.5   | 0.3   | 0.6   | 0.2   | 0.4   | 0.5   | 0.7   | 0.2   | 0.5   |
| Gprc5a  | 2.7   | 1.3   | 0.6   | 3.1   | 1.4   | 1.7   | 1.5   | 0.9   | 1.0   | 1.5   | 1.8   | 0.7   |
| Gprc5b  | 7.2   | 8.4   | 10.1  | 4.4   | 8.5   | 8.5   | 11.5  | 12.2  | 9.6   | 10.6  | 11.1  | 8.8   |
| Gprc5c  | 0.1   | 0.1   | 0.0   | 0.3   | 0.1   | 0.2   | 0.1   | 0.0   | 0.0   | 0.1   | 0.0   | 0.0   |
| Gprc6a  | 0.4   | 0.3   | 0.1   | 0.5   | 0.2   | 0.2   | 0.2   | 0.1   | 0.1   | 0.1   | 0.3   | 0.1   |
| Gprin1  | 0.1   | 0.0   | 0.0   | 0.2   | 0.1   | 0.1   | 0.1   | 0.1   | 0.1   | 0.1   | 0.1   | 0.1   |
| Gprin2  | 0.2   | 0.1   | 0.1   | 0.1   | 0.1   | 0.1   | 0.0   | 0.2   | 0.1   | 0.1   | 0.0   | 0.1   |
| Gprin3  | 0.1   | 0.1   | 0.2   | 0.0   | 0.0   | 0.0   | 0.0   | 0.1   | 0.1   | 0.3   | 0.3   | 0.3   |
| Gps1    | 51.2  | 48.1  | 42.0  | 50.8  | 44.3  | 48.5  | 49.3  | 44.4  | 44.8  | 49.5  | 49.3  | 47.8  |
| Gps2    | 7.1   | 7.4   | 9.6   | 10.1  | 8.5   | 7.2   | 10.4  | 10.0  | 10.0  | 7.1   | 9.2   | 9.6   |
| Gpsm1   | 9.6   | 12.1  | 11.1  | 10.2  | 9.4   | 8.9   | 13.8  | 11.0  | 13.5  | 10.9  | 9.8   | 9.9   |
| Gpsm2   | 2.6   | 3.3   | 4.3   | 1.6   | 2.9   | 1.9   | 3.4   | 3.5   | 3.3   | 3.8   | 3.5   | 3.6   |
| Gpsm3   | 4.8   | 5.1   | 5.2   | 12.7  | 12.2  | 7.5   | 5.8   | 4.5   | 4.4   | 4.7   | 5.4   | 4.5   |
| Gpt     | 0.6   | 0.7   | 0.8   | 0.6   | 0.7   | 0.6   | 0.3   | 0.6   | 0.4   | 0.8   | 0.5   | 0.4   |
| Gpt2    | 9.3   | 7.0   | 5.8   | 8.6   | 5.5   | 9.5   | 5.6   | 7.7   | 6.9   | 8.0   | 7.6   | 6.3   |
| Gpx1    | 146.0 | 100.9 | 89.3  | 140.8 | 105.6 | 132.6 | 105.1 | 93.9  | 86.6  | 147.9 | 111.9 | 114.4 |
| Gpx3    | 72.6  | 85.0  | 99.1  | 80.2  | 81.2  | 65.2  | 78.0  | 67.0  | 90.2  | 63.9  | 56.3  | 95.9  |
| Gpx4    | 422.5 | 338.4 | 274.1 | 449.7 | 308.7 | 498.9 | 280.5 | 299.5 | 286.3 | 316.1 | 301.8 | 310.0 |
| Gpx7    | 23.8  | 30.6  | 37.4  | 16.8  | 26.3  | 18.7  | 31.1  | 38.8  | 41.1  | 26.7  | 26.7  | 32.8  |
| Gpx8    | 203.4 | 151.7 | 149.2 | 225.0 | 149.6 | 201.1 | 148.3 | 143.7 | 127.5 | 186.4 | 180.7 | 192.9 |
| Gramd1a | 16.7  | 15.9  | 15.5  | 14.1  | 16.1  | 15.9  | 17.2  | 16.2  | 18.2  | 14.1  | 14.4  | 13.6  |
| Gramd1b | 3.0   | 2.1   | 1.6   | 4.2   | 2.9   | 4.0   | 2.2   | 2.3   | 1.7   | 1.9   | 2.3   | 2.1   |

Online Table 1

|           |       |      |      |       |       |       |      |      |      |      |      |      |
|-----------|-------|------|------|-------|-------|-------|------|------|------|------|------|------|
| Gramd1c   | 0.3   | 0.5  | 0.8  | 0.3   | 0.3   | 0.5   | 0.3  | 0.5  | 0.4  | 0.4  | 0.3  | 0.3  |
| Gramd2    | 0.1   | 0.5  | 0.3  | 0.0   | 0.1   | 0.1   | 0.2  | 0.2  | 0.2  | 0.0  | 0.0  | 0.0  |
| Gramd3    | 6.6   | 7.1  | 6.2  | 6.1   | 6.1   | 6.7   | 5.8  | 7.6  | 6.3  | 6.0  | 7.1  | 6.0  |
| Gramd4    | 8.9   | 6.9  | 5.5  | 10.6  | 7.2   | 8.6   | 9.8  | 6.6  | 8.0  | 7.2  | 6.9  | 6.6  |
| Grap      | 3.8   | 3.3  | 1.8  | 5.4   | 2.4   | 5.0   | 1.9  | 1.8  | 1.8  | 1.0  | 1.1  | 0.9  |
| Grap2     | 0.0   | 0.0  | 0.0  | 0.0   | 0.0   | 0.0   | 0.0  | 0.0  | 0.0  | 0.0  | 0.0  | 0.0  |
| Grasp     | 3.3   | 3.4  | 4.1  | 2.9   | 3.2   | 4.1   | 3.9  | 3.9  | 4.3  | 3.2  | 3.4  | 3.8  |
| Grb10     | 40.0  | 35.0 | 33.4 | 35.1  | 25.2  | 40.0  | 27.3 | 43.0 | 34.2 | 55.6 | 57.5 | 31.2 |
| Grb14     | 29.9  | 34.2 | 51.3 | 18.5  | 23.2  | 12.5  | 23.7 | 38.3 | 25.9 | 21.1 | 30.1 | 36.5 |
| Grb2      | 10.0  | 12.2 | 14.1 | 11.1  | 14.6  | 11.8  | 11.6 | 13.0 | 11.8 | 12.8 | 12.2 | 13.1 |
| Grcc10    | 57.4  | 58.0 | 54.2 | 52.8  | 55.1  | 70.2  | 37.9 | 54.1 | 48.6 | 67.2 | 54.5 | 46.8 |
| Greb1     | 0.2   | 0.4  | 0.9  | 0.1   | 0.5   | 0.1   | 0.5  | 0.5  | 0.4  | 0.4  | 0.4  | 0.5  |
| Greb1l    | 0.6   | 1.2  | 1.6  | 0.4   | 0.8   | 0.5   | 0.9  | 1.2  | 1.0  | 0.7  | 0.5  | 0.8  |
| Grem1     | 0.1   | 0.1  | 0.0  | 0.1   | 0.1   | 0.4   | 0.4  | 0.1  | 0.4  | 10.0 | 8.3  | 4.5  |
| Grem2     | 0.1   | 0.1  | 0.0  | 0.1   | 0.1   | 0.1   | 0.6  | 0.1  | 0.3  | 2.0  | 1.3  | 1.4  |
| Grhl1     | 0.2   | 0.3  | 0.2  | 0.1   | 0.1   | 0.1   | 0.1  | 0.1  | 0.1  | 0.3  | 0.2  | 0.3  |
| Grhl3     | 0.2   | 0.2  | 0.2  | 0.4   | 0.2   | 0.1   | 0.2  | 0.0  | 0.0  | 0.2  | 0.1  | 0.1  |
| Grhpr     | 9.7   | 10.5 | 10.0 | 7.8   | 9.1   | 9.5   | 8.4  | 8.1  | 8.6  | 10.4 | 8.8  | 7.3  |
| Gria1     | 0.0   | 0.0  | 0.0  | 0.0   | 0.0   | 0.0   | 0.0  | 0.0  | 0.0  | 0.0  | 0.0  | 0.0  |
| Gria3     | 8.2   | 7.4  | 9.3  | 5.8   | 8.1   | 7.2   | 7.9  | 6.6  | 6.5  | 11.3 | 9.7  | 8.7  |
| Gria4     | 3.9   | 1.4  | 0.7  | 0.8   | 1.0   | 0.4   | 1.2  | 0.3  | 1.8  | 2.8  | 1.5  | 1.9  |
| Grid2ip   | 0.1   | 0.0  | 0.0  | 0.0   | 0.0   | 0.0   | 0.0  | 0.0  | 0.0  | 0.0  | 0.0  | 0.0  |
| Grik1     | 0.0   | 0.0  | 0.0  | 0.0   | 0.0   | 0.0   | 0.0  | 0.0  | 0.0  | 0.0  | 0.0  | 0.0  |
| Grik2     | 0.1   | 0.2  | 0.5  | 0.1   | 0.5   | 0.1   | 0.5  | 0.6  | 0.4  | 0.1  | 0.2  | 0.1  |
| Grik3     | 0.0   | 0.0  | 0.0  | 0.0   | 0.0   | 0.0   | 0.0  | 0.0  | 0.0  | 0.0  | 0.0  | 0.0  |
| Grik4     | 0.0   | 0.1  | 0.0  | 0.1   | 0.1   | 0.0   | 0.1  | 0.0  | 0.0  | 0.0  | 0.0  | 0.0  |
| Grik5     | 0.9   | 0.9  | 1.1  | 0.4   | 0.4   | 0.9   | 0.5  | 0.6  | 0.6  | 0.7  | 0.7  | 0.6  |
| Grin1     | 0.5   | 0.6  | 0.6  | 0.3   | 0.4   | 0.5   | 1.0  | 0.9  | 0.6  | 0.3  | 0.6  | 0.4  |
| Grin2b    | 0.0   | 0.0  | 0.0  | 0.0   | 0.0   | 0.0   | 0.0  | 0.0  | 0.0  | 0.0  | 0.0  | 0.0  |
| Grin2c    | 0.0   | 0.0  | 0.0  | 0.0   | 0.0   | 0.0   | 0.0  | 0.0  | 0.0  | 0.0  | 0.0  | 0.0  |
| Grin2d    | 0.1   | 0.1  | 0.1  | 0.2   | 0.1   | 0.1   | 0.2  | 0.2  | 0.1  | 0.1  | 0.1  | 0.1  |
| Grin3a    | 0.1   | 0.1  | 0.1  | 0.1   | 0.1   | 0.1   | 0.1  | 0.1  | 0.0  | 0.1  | 0.1  | 0.1  |
| Grin3b    | 0.2   | 0.1  | 0.1  | 0.1   | 0.0   | 0.1   | 0.0  | 0.0  | 0.1  | 0.1  | 0.1  | 0.1  |
| Grina     | 108.2 | 87.7 | 65.1 | 135.7 | 82.5  | 116.8 | 63.9 | 59.1 | 60.8 | 75.2 | 71.7 | 65.9 |
| Grip1     | 0.1   | 0.0  | 0.0  | 0.1   | 0.0   | 0.1   | 0.0  | 0.0  | 0.0  | 0.0  | 0.1  | 0.0  |
| Grip2     | 0.0   | 0.0  | 0.0  | 0.0   | 0.0   | 0.0   | 0.0  | 0.0  | 0.0  | 0.0  | 0.0  | 0.0  |
| Gripap1   | 7.0   | 6.0  | 6.7  | 8.9   | 7.2   | 6.8   | 7.0  | 7.1  | 6.5  | 7.0  | 7.5  | 7.4  |
| Grk1      | 0.3   | 0.3  | 0.3  | 0.2   | 0.2   | 0.2   | 0.3  | 0.3  | 0.3  | 0.2  | 0.2  | 0.2  |
| Grk4      | 2.4   | 3.6  | 3.1  | 2.0   | 2.2   | 2.2   | 2.8  | 2.8  | 2.6  | 2.5  | 2.7  | 2.8  |
| Grk5      | 32.9  | 31.5 | 31.0 | 23.9  | 27.0  | 29.9  | 29.5 | 26.1 | 29.0 | 20.7 | 25.6 | 31.8 |
| Grk6      | 8.4   | 9.2  | 8.0  | 9.1   | 10.2  | 8.8   | 12.4 | 9.1  | 11.9 | 10.3 | 10.3 | 10.5 |
| Grlf1     | 23.3  | 25.7 | 24.5 | 22.7  | 20.7  | 22.8  | 22.3 | 23.1 | 20.8 | 21.8 | 23.0 | 22.7 |
| Grm1      | 0.0   | 0.0  | 0.0  | 0.1   | 0.0   | 0.0   | 0.0  | 0.0  | 0.0  | 0.0  | 0.0  | 0.0  |
| Grm3      | 0.0   | 0.0  | 0.0  | 0.0   | 0.0   | 0.0   | 0.1  | 0.0  | 0.0  | 0.1  | 0.1  | 0.0  |
| Grm5      | 0.0   | 0.0  | 0.0  | 0.0   | 0.0   | 0.0   | 0.0  | 0.0  | 0.0  | 0.0  | 0.0  | 0.0  |
| Grm7      | 0.0   | 0.0  | 0.0  | 0.0   | 0.0   | 0.0   | 0.0  | 0.0  | 0.0  | 0.0  | 0.0  | 0.0  |
| Grn       | 91.2  | 79.6 | 77.9 | 116.3 | 134.4 | 88.8  | 70.8 | 72.9 | 75.4 | 61.4 | 59.7 | 61.0 |
| Grpel1    | 16.5  | 14.6 | 12.5 | 15.7  | 14.0  | 16.1  | 13.9 | 13.1 | 13.2 | 14.3 | 16.4 | 13.7 |
| Grpel2    | 5.2   | 4.0  | 3.4  | 5.3   | 4.3   | 5.1   | 4.4  | 3.5  | 3.6  | 4.0  | 3.9  | 4.2  |
| Grrp1     | 0.0   | 0.0  | 0.0  | 0.0   | 0.0   | 0.0   | 0.1  | 0.0  | 0.1  | 0.0  | 0.0  | 0.0  |
| Grsf1     | 28.4  | 29.3 | 26.8 | 24.0  | 23.4  | 25.3  | 24.9 | 23.5 | 25.4 | 27.3 | 27.7 | 29.3 |
| Grtp1     | 1.0   | 0.8  | 0.7  | 0.7   | 0.3   | 0.9   | 0.6  | 0.7  | 0.5  | 1.0  | 0.7  | 1.1  |
| Grwd1     | 6.7   | 5.7  | 4.5  | 6.6   | 6.6   | 5.9   | 5.9  | 5.3  | 5.1  | 5.7  | 5.1  | 3.7  |
| Gsc       | 0.0   | 0.0  | 0.1  | 0.0   | 0.0   | 0.1   | 0.0  | 0.1  | 0.2  | 2.1  | 1.8  | 0.7  |
| Gsdma     | 0.0   | 0.0  | 0.0  | 0.0   | 0.0   | 0.0   | 0.0  | 0.0  | 0.0  | 0.0  | 0.0  | 0.0  |
| Gsdmc4    | 0.1   | 0.0  | 0.0  | 0.0   | 0.0   | 0.0   | 0.0  | 0.0  | 0.0  | 0.0  | 0.0  | 0.0  |
| Gsdmcl-ps | 0.0   | 0.1  | 0.0  | 0.0   | 0.1   | 0.0   | 0.0  | 0.0  | 0.0  | 0.0  | 0.0  | 0.1  |

Online Table 1



|               |       |       |       |       |       |       |       |       |       |       |       |       |
|---------------|-------|-------|-------|-------|-------|-------|-------|-------|-------|-------|-------|-------|
| Gsdmd         | 10.9  | 12.9  | 14.4  | 16.6  | 14.4  | 12.1  | 12.3  | 12.3  | 13.3  | 11.0  | 10.7  | 11.6  |
| Gse1          | 1.0   | 1.6   | 1.5   | 1.3   | 1.6   | 1.2   | 1.7   | 1.2   | 1.1   | 1.3   | 1.2   | 1.0   |
| Gsg1          | 0.1   | 0.0   | 0.3   | 0.3   | 0.0   | 0.0   | 0.2   | 0.2   | 0.0   | 0.0   | 0.1   | 0.1   |
| Gsg1l         | 0.0   | 0.0   | 0.0   | 0.0   | 0.0   | 0.0   | 0.0   | 0.0   | 0.0   | 0.0   | 0.0   | 0.0   |
| Gsg2          | 0.7   | 1.0   | 1.3   | 0.5   | 1.0   | 0.3   | 1.5   | 0.6   | 1.3   | 0.7   | 0.8   | 0.8   |
| Gsk3a         | 12.9  | 13.3  | 12.0  | 15.0  | 11.8  | 13.2  | 13.2  | 11.9  | 12.3  | 11.6  | 11.4  | 10.7  |
| Gsk3b         | 9.0   | 10.7  | 10.7  | 8.7   | 10.1  | 10.0  | 10.5  | 10.6  | 9.7   | 9.0   | 10.2  | 8.6   |
| Gskip         | 12.4  | 11.3  | 9.4   | 10.2  | 10.5  | 9.2   | 9.3   | 8.9   | 10.3  | 10.8  | 9.4   | 11.3  |
| Gsn           | 215.4 | 290.6 | 353.2 | 192.5 | 237.1 | 234.6 | 250.7 | 276.3 | 253.0 | 233.1 | 227.8 | 257.2 |
| Gspt1         | 16.8  | 16.1  | 17.0  | 17.5  | 16.2  | 14.6  | 17.6  | 15.4  | 15.5  | 20.4  | 18.6  | 19.3  |
| Gspt2         | 3.4   | 3.3   | 3.2   | 2.6   | 2.2   | 3.8   | 3.2   | 3.1   | 2.7   | 3.0   | 3.3   | 3.3   |
| Gsr           | 17.1  | 13.5  | 13.8  | 24.4  | 22.3  | 20.5  | 15.0  | 16.1  | 13.1  | 12.8  | 12.9  | 15.0  |
| Gss           | 19.7  | 15.4  | 9.2   | 22.2  | 18.2  | 24.0  | 11.7  | 10.1  | 9.4   | 15.4  | 13.9  | 11.5  |
| Gsta1         | 0.9   | 0.5   | 0.5   | 0.8   | 0.7   | 1.1   | 0.2   | 0.6   | 0.1   | 0.1   | 0.1   | 0.2   |
| Gsta2         | 0.5   | 0.2   | 0.2   | 0.5   | 0.5   | 0.4   | 0.2   | 0.4   | 0.1   | 0.1   | 0.2   | 0.1   |
| Gsta3         | 76.4  | 73.1  | 54.0  | 134.0 | 66.7  | 104.7 | 17.9  | 46.2  | 12.5  | 40.6  | 26.8  | 28.4  |
| Gsta4         | 4.2   | 7.3   | 8.5   | 5.5   | 9.7   | 15.0  | 2.8   | 20.9  | 4.8   | 47.8  | 23.9  | 12.2  |
| Gstcd         | 1.7   | 2.4   | 1.9   | 1.5   | 2.0   | 1.9   | 2.2   | 2.1   | 2.2   | 1.5   | 2.6   | 2.1   |
| Gstk1         | 8.8   | 10.9  | 10.3  | 7.8   | 8.3   | 10.9  | 9.0   | 8.3   | 8.1   | 6.9   | 8.4   | 7.3   |
| Gstm1         | 465.0 | 539.6 | 305.3 | 812.7 | 406.7 | 949.2 | 185.8 | 200.8 | 111.9 | 158.5 | 176.7 | 129.0 |
| Gstm2         | 257.5 | 266.4 | 285.4 | 330.9 | 222.4 | 281.7 | 244.0 | 277.4 | 206.5 | 196.8 | 236.5 | 218.5 |
| Gstm3         | 2.6   | 2.4   | 1.7   | 4.7   | 2.7   | 4.1   | 0.9   | 1.1   | 0.4   | 0.7   | 1.2   | 0.9   |
| Gstm4         | 15.3  | 16.9  | 13.6  | 16.4  | 10.6  | 20.1  | 10.5  | 9.8   | 11.3  | 8.7   | 10.5  | 9.8   |
| Gstm5         | 78.5  | 68.2  | 75.7  | 65.0  | 60.9  | 73.0  | 59.0  | 72.7  | 56.8  | 55.5  | 69.9  | 55.0  |
| Gstm6         | 6.1   | 5.8   | 3.5   | 6.2   | 3.2   | 5.3   | 1.9   | 1.9   | 1.7   | 2.0   | 3.7   | 2.2   |
| Gstm7         | 5.3   | 5.4   | 4.3   | 6.1   | 4.3   | 6.8   | 3.7   | 2.6   | 3.0   | 2.9   | 2.5   | 2.4   |
| Gsto1         | 162.2 | 85.7  | 54.0  | 174.8 | 118.3 | 139.9 | 120.4 | 62.3  | 65.8  | 148.0 | 125.3 | 90.1  |
| Gsto2         | 1.6   | 1.5   | 0.9   | 2.8   | 1.0   | 2.7   | 1.1   | 1.1   | 0.8   | 1.4   | 1.2   | 1.4   |
| Gstp1         | 105.1 | 97.7  | 82.0  | 120.5 | 80.6  | 162.3 | 57.9  | 77.5  | 59.1  | 75.8  | 67.1  | 64.5  |
| Gstp2         | 32.3  | 30.3  | 25.2  | 39.0  | 24.2  | 54.2  | 18.2  | 22.8  | 15.1  | 21.3  | 20.6  | 17.9  |
| Gstt1         | 11.1  | 15.5  | 27.4  | 6.9   | 10.3  | 10.4  | 12.6  | 25.7  | 15.6  | 10.6  | 12.3  | 13.4  |
| Gstt2         | 2.4   | 1.8   | 1.5   | 1.5   | 1.3   | 4.2   | 0.9   | 0.9   | 1.1   | 1.5   | 1.2   | 0.8   |
| Gstt3         | 4.5   | 6.0   | 6.5   | 3.4   | 3.6   | 4.4   | 3.6   | 4.6   | 3.3   | 5.1   | 5.7   | 4.8   |
| Gstz1         | 11.8  | 10.9  | 10.4  | 9.5   | 9.1   | 11.0  | 8.3   | 11.7  | 9.1   | 9.0   | 11.4  | 9.4   |
| Gt(ROSA)26Sor | 2.5   | 3.4   | 2.9   | 2.8   | 2.8   | 2.8   | 2.6   | 3.2   | 3.8   | 3.2   | 5.0   | 4.8   |
| Gtdc1         | 2.9   | 2.8   | 2.4   | 3.0   | 2.6   | 2.9   | 2.2   | 2.6   | 2.5   | 2.6   | 2.7   | 2.1   |
| Gtdc2         | 4.5   | 4.3   | 3.4   | 6.1   | 4.5   | 6.3   | 4.9   | 3.1   | 4.7   | 5.2   | 3.4   | 4.1   |
| Gtf2a1        | 6.1   | 7.1   | 7.3   | 9.4   | 7.9   | 7.7   | 6.8   | 7.5   | 6.5   | 6.9   | 7.7   | 8.1   |
| Gtf2a1l       | 0.0   | 0.0   | 0.0   | 0.0   | 0.0   | 0.1   | 0.0   | 0.0   | 0.0   | 0.0   | 0.1   | 0.0   |
| Gtf2a2        | 23.9  | 26.5  | 24.0  | 23.1  | 24.6  | 26.2  | 23.8  | 26.0  | 25.0  | 27.0  | 27.0  | 27.0  |
| Gtf2b         | 41.6  | 41.6  | 35.1  | 40.6  | 34.5  | 33.3  | 35.3  | 34.6  | 34.3  | 48.9  | 41.8  | 40.0  |
| Gtf2e1        | 10.2  | 12.4  | 9.5   | 11.7  | 10.8  | 10.6  | 9.5   | 9.5   | 9.7   | 9.6   | 11.5  | 9.7   |
| Gtf2e2        | 14.4  | 14.6  | 14.0  | 11.5  | 13.1  | 11.9  | 12.1  | 13.8  | 14.4  | 16.5  | 16.3  | 15.5  |
| Gtf2f1        | 37.9  | 38.0  | 42.8  | 47.6  | 31.8  | 34.1  | 42.7  | 38.7  | 30.5  | 30.2  | 41.5  | 43.6  |
| Gtf2f2        | 15.9  | 15.8  | 21.9  | 16.1  | 17.5  | 14.8  | 17.1  | 19.0  | 16.6  | 15.3  | 20.3  | 18.9  |
| Gtf2h1        | 32.9  | 29.3  | 27.3  | 34.5  | 28.5  | 32.3  | 25.9  | 27.1  | 24.5  | 26.0  | 31.7  | 28.2  |
| Gtf2h2        | 5.5   | 5.7   | 5.4   | 6.4   | 6.0   | 5.7   | 5.4   | 6.2   | 5.9   | 5.5   | 6.0   | 6.2   |
| Gtf2h3        | 7.5   | 7.8   | 7.0   | 6.2   | 6.4   | 6.6   | 5.5   | 7.0   | 6.7   | 8.1   | 7.8   | 7.0   |
| Gtf2h4        | 6.7   | 6.7   | 6.3   | 5.2   | 5.5   | 8.4   | 6.4   | 6.0   | 6.2   | 5.3   | 5.6   | 5.0   |
| Gtf2h5        | 43.9  | 37.3  | 35.8  | 39.1  | 41.0  | 39.4  | 38.7  | 37.9  | 37.8  | 41.7  | 40.8  | 39.7  |
| Gtf2i         | 13.4  | 15.0  | 15.3  | 11.6  | 12.2  | 14.0  | 13.3  | 14.9  | 13.7  | 15.6  | 14.0  | 14.2  |
| Gtf2ird1      | 5.4   | 6.8   | 6.0   | 5.7   | 5.2   | 6.2   | 6.0   | 4.9   | 5.7   | 5.7   | 5.4   | 5.1   |
| Gtf2ird2      | 1.3   | 1.4   | 1.8   | 1.5   | 1.6   | 1.4   | 1.3   | 1.5   | 1.6   | 1.9   | 1.7   | 1.7   |
| Gtf3a         | 16.1  | 13.1  | 13.2  | 13.1  | 11.2  | 14.2  | 11.3  | 12.8  | 11.3  | 13.5  | 11.6  | 11.0  |
| Gtf3c1        | 20.3  | 18.5  | 17.7  | 18.2  | 16.7  | 18.6  | 18.5  | 16.3  | 16.6  | 22.0  | 18.6  | 17.2  |
| Gtf3c2        | 4.7   | 5.5   | 6.1   | 4.7   | 5.5   | 4.8   | 5.3   | 6.6   | 6.3   | 5.4   | 5.8   | 5.0   |
| Gtf3c3        | 13.8  | 15.6  | 14.5  | 12.8  | 12.7  | 14.5  | 11.6  | 14.5  | 12.7  | 13.5  | 14.3  | 13.9  |

Online Table 1

|         |       |       |       |       |       |       |      |      |      |      |      |      |
|---------|-------|-------|-------|-------|-------|-------|------|------|------|------|------|------|
| Gtf3c4  | 7.4   | 7.8   | 7.2   | 7.3   | 7.0   | 7.5   | 6.9  | 6.6  | 7.0  | 7.0  | 7.3  | 6.9  |
| Gtf3c5  | 4.2   | 5.3   | 5.2   | 4.0   | 5.5   | 4.3   | 5.6  | 5.9  | 5.0  | 4.6  | 5.0  | 4.6  |
| Gtf3c6  | 16.4  | 12.8  | 14.5  | 22.2  | 15.2  | 15.8  | 16.4 | 16.8 | 13.0 | 16.2 | 18.2 | 18.0 |
| Gtl3    | 13.9  | 13.6  | 14.9  | 15.5  | 13.2  | 16.3  | 16.0 | 17.1 | 14.7 | 16.5 | 15.6 | 15.0 |
| Gtpbp1  | 7.2   | 7.0   | 6.1   | 7.5   | 6.4   | 7.4   | 6.4  | 7.4  | 7.6  | 6.1  | 7.1  | 6.7  |
| Gtpbp10 | 7.5   | 7.9   | 7.3   | 8.0   | 6.5   | 8.2   | 6.6  | 5.9  | 5.6  | 6.5  | 7.0  | 6.4  |
| Gtpbp2  | 9.0   | 9.4   | 10.0  | 8.8   | 9.0   | 9.5   | 8.2  | 10.0 | 11.2 | 8.5  | 9.2  | 7.9  |
| Gtpbp3  | 3.4   | 3.9   | 3.4   | 3.7   | 3.9   | 3.4   | 3.4  | 3.7  | 3.4  | 3.5  | 3.2  | 3.2  |
| Gtpbp4  | 35.5  | 33.7  | 30.8  | 35.8  | 30.4  | 34.1  | 31.2 | 25.7 | 24.8 | 32.8 | 34.5 | 33.9 |
| Gtpbp5  | 6.5   | 6.1   | 5.3   | 7.1   | 5.2   | 7.5   | 5.0  | 5.0  | 5.2  | 6.0  | 6.4  | 5.5  |
| Gtpbp6  | 4.2   | 4.4   | 3.8   | 4.1   | 3.7   | 3.6   | 4.2  | 4.1  | 5.1  | 4.1  | 3.4  | 3.6  |
| Gtpbp8  | 9.8   | 10.2  | 10.5  | 10.0  | 9.0   | 8.5   | 8.2  | 10.4 | 11.3 | 10.2 | 12.1 | 11.7 |
| Gtse1   | 12.4  | 13.8  | 13.8  | 12.5  | 15.4  | 13.7  | 15.9 | 7.6  | 12.0 | 13.3 | 12.8 | 10.7 |
| Guca1a  | 2.3   | 0.8   | 0.6   | 2.3   | 1.6   | 1.9   | 1.0  | 1.1  | 0.5  | 0.9  | 1.3  | 1.4  |
| Guca1b  | 0.3   | 0.1   | 0.2   | 0.6   | 0.4   | 0.2   | 0.1  | 0.1  | 0.2  | 0.2  | 0.2  | 0.2  |
| Gucd1   | 5.5   | 6.8   | 6.7   | 5.3   | 6.0   | 4.5   | 6.0  | 7.8  | 7.4  | 5.7  | 5.8  | 6.1  |
| Gucy1a2 | 2.9   | 4.4   | 4.3   | 3.3   | 4.2   | 2.7   | 5.5  | 2.7  | 4.6  | 4.8  | 6.1  | 4.8  |
| Gucy1a3 | 2.0   | 6.1   | 11.7  | 1.6   | 2.8   | 1.0   | 3.5  | 9.1  | 14.8 | 5.4  | 4.9  | 14.9 |
| Gucy1b3 | 6.7   | 10.4  | 16.7  | 7.4   | 8.5   | 8.0   | 12.5 | 11.7 | 24.4 | 7.2  | 9.8  | 18.8 |
| Gucy2c  | 0.2   | 0.2   | 0.1   | 0.0   | 0.1   | 0.1   | 0.0  | 0.0  | 0.0  | 0.1  | 0.1  | 0.1  |
| Gucy2e  | 0.0   | 0.0   | 0.0   | 0.0   | 0.0   | 0.0   | 0.0  | 0.0  | 0.0  | 0.0  | 0.0  | 0.0  |
| Gucy2g  | 0.0   | 0.0   | 0.0   | 0.0   | 0.0   | 0.0   | 0.0  | 0.0  | 0.0  | 0.1  | 0.0  | 0.0  |
| Guf1    | 2.8   | 3.3   | 3.5   | 3.1   | 2.8   | 2.9   | 3.3  | 3.5  | 3.2  | 2.9  | 3.2  | 3.1  |
| Guk1    | 44.7  | 31.7  | 23.9  | 47.5  | 28.5  | 45.2  | 27.6 | 29.5 | 29.2 | 31.6 | 29.2 | 27.4 |
| Gulp1   | 7.6   | 8.4   | 11.8  | 8.5   | 5.2   | 8.1   | 8.7  | 7.9  | 8.0  | 8.1  | 12.9 | 9.6  |
| Gusb    | 40.6  | 29.4  | 24.0  | 64.3  | 88.4  | 41.2  | 34.2 | 24.8 | 25.4 | 34.4 | 26.6 | 29.6 |
| Gvin1   | 2.8   | 1.6   | 6.2   | 9.5   | 7.6   | 1.3   | 7.2  | 0.8  | 4.5  | 1.1  | 5.9  | 4.4  |
| Gxylt1  | 5.7   | 6.2   | 7.0   | 5.0   | 6.9   | 3.8   | 7.0  | 6.3  | 6.2  | 5.1  | 7.0  | 7.1  |
| Gxylt2  | 3.8   | 3.2   | 5.6   | 2.3   | 2.9   | 2.3   | 1.7  | 5.8  | 2.7  | 4.6  | 2.9  | 4.1  |
| Gyg     | 92.1  | 85.1  | 66.3  | 76.5  | 65.1  | 57.6  | 56.5 | 53.0 | 81.0 | 51.1 | 58.7 | 77.0 |
| Gyk     | 2.0   | 1.5   | 1.2   | 2.6   | 3.5   | 1.8   | 2.1  | 1.2  | 1.4  | 1.9  | 1.8  | 1.7  |
| Gylt1b  | 0.0   | 0.0   | 0.0   | 0.0   | 0.0   | 0.0   | 0.0  | 0.0  | 0.1  | 0.0  | 0.0  | 0.0  |
| Gypc    | 14.3  | 11.9  | 12.8  | 13.5  | 10.2  | 16.8  | 12.5 | 12.0 | 11.7 | 10.0 | 14.0 | 12.4 |
| Gys1    | 8.2   | 9.2   | 9.9   | 7.1   | 8.8   | 8.1   | 11.6 | 10.6 | 10.7 | 9.6  | 9.8  | 9.6  |
| Gys2    | 0.0   | 0.0   | 0.0   | 0.0   | 0.0   | 0.1   | 0.0  | 0.0  | 0.0  | 0.0  | 0.0  | 0.0  |
| Gzf1    | 10.1  | 10.8  | 9.3   | 10.0  | 8.8   | 9.9   | 7.9  | 8.1  | 8.1  | 9.7  | 9.3  | 10.2 |
| Gzmc    | 0.2   | 0.2   | 0.1   | 0.3   | 0.2   | 0.2   | 0.4  | 0.2  | 0.1  | 0.3  | 0.1  | 0.6  |
| Gzme    | 0.0   | 0.0   | 0.0   | 0.3   | 0.0   | 0.0   | 0.0  | 0.1  | 0.0  | 0.1  | 0.6  | 0.2  |
| Gzmk    | 0.0   | 0.0   | 0.0   | 0.0   | 0.0   | 0.1   | 0.0  | 0.0  | 0.0  | 0.0  | 0.0  | 0.0  |
| Gzmm    | 0.2   | 0.2   | 0.1   | 0.2   | 0.3   | 0.3   | 0.2  | 0.2  | 0.3  | 0.3  | 0.2  | 0.2  |
| H13     | 40.0  | 32.8  | 28.4  | 50.8  | 37.9  | 37.9  | 44.6 | 38.2 | 32.7 | 46.5 | 41.5 | 41.5 |
| H19     | 0.3   | 0.6   | 2.0   | 0.1   | 1.0   | 0.1   | 1.5  | 1.2  | 2.0  | 1.2  | 1.4  | 0.9  |
| H1f0    | 30.1  | 31.3  | 33.4  | 27.5  | 25.4  | 34.5  | 29.8 | 38.0 | 35.6 | 30.0 | 33.8 | 34.5 |
| H1fx    | 0.5   | 0.6   | 0.8   | 0.6   | 0.8   | 0.5   | 0.5  | 1.3  | 1.6  | 1.2  | 0.6  | 1.1  |
| H2-Aa   | 0.4   | 0.1   | 0.1   | 0.2   | 0.1   | 0.1   | 0.0  | 0.0  | 0.0  | 0.1  | 0.1  | 0.0  |
| H2-Ab1  | 0.5   | 0.4   | 0.1   | 0.9   | 0.8   | 2.0   | 0.8  | 0.1  | 0.2  | 0.5  | 0.3  | 0.3  |
| H2afj   | 21.5  | 18.6  | 17.0  | 18.0  | 21.4  | 16.7  | 20.4 | 19.2 | 18.4 | 27.9 | 21.0 | 20.0 |
| H2afv   | 8.9   | 10.7  | 14.3  | 8.1   | 10.5  | 11.2  | 11.5 | 12.1 | 11.7 | 11.8 | 12.1 | 11.6 |
| H2afx   | 6.9   | 6.7   | 7.8   | 4.1   | 9.0   | 5.8   | 10.5 | 8.5  | 9.2  | 8.2  | 8.2  | 6.6  |
| H2afy   | 31.8  | 30.2  | 23.6  | 33.5  | 31.1  | 32.4  | 30.0 | 25.8 | 25.7 | 28.5 | 29.5 | 28.6 |
| H2afy2  | 4.5   | 4.8   | 7.6   | 3.6   | 3.6   | 5.1   | 4.6  | 6.1  | 5.1  | 4.1  | 4.5  | 4.8  |
| H2afy3  | 0.2   | 0.3   | 0.1   | 0.1   | 0.3   | 0.2   | 0.2  | 0.1  | 0.1  | 0.3  | 0.2  | 0.1  |
| H2afz   | 39.5  | 45.8  | 44.8  | 35.0  | 57.9  | 42.8  | 46.7 | 43.2 | 57.3 | 48.0 | 45.6 | 37.6 |
| H2-BI   | 0.4   | 0.2   | 0.2   | 0.6   | 0.4   | 0.4   | 0.4  | 0.2  | 0.3  | 0.2  | 0.1  | 0.2  |
| H2-D1   | 196.8 | 124.2 | 175.1 | 332.2 | 220.4 | 177.1 | 94.8 | 79.6 | 62.3 | 52.7 | 48.6 | 75.6 |
| H2-DMa  | 1.8   | 2.0   | 1.4   | 1.9   | 2.6   | 1.9   | 1.9  | 1.3  | 1.0  | 1.5  | 1.5  | 1.0  |
| H2-DMb1 | 3.2   | 3.3   | 2.7   | 3.9   | 3.7   | 2.8   | 1.4  | 1.6  | 2.2  | 6.0  | 3.4  | 3.4  |

Online Table 1

|         |       |       |       |       |       |       |       |       |       |       |       |       |
|---------|-------|-------|-------|-------|-------|-------|-------|-------|-------|-------|-------|-------|
| H2-DMb2 | 0.2   | 0.1   | 0.1   | 0.4   | 0.3   | 0.1   | 0.1   | 0.0   | 0.1   | 0.4   | 0.5   | 0.2   |
| H2-Eb1  | 0.6   | 0.4   | 0.7   | 0.6   | 0.4   | 0.3   | 0.3   | 0.4   | 0.5   | 0.2   | 0.4   | 0.4   |
| H2-K1   | 203.3 | 136.6 | 186.8 | 348.6 | 237.6 | 219.7 | 126.7 | 100.4 | 82.8  | 54.5  | 63.1  | 85.5  |
| H2-K2   | 2.4   | 2.4   | 2.1   | 3.5   | 2.3   | 2.2   | 1.1   | 1.2   | 1.7   | 1.4   | 1.0   | 1.7   |
| H2-Ke2  | 26.0  | 26.0  | 25.3  | 32.9  | 29.1  | 28.9  | 26.3  | 28.3  | 23.1  | 26.0  | 28.5  | 29.0  |
| H2-Ke6  | 10.8  | 9.3   | 11.6  | 8.6   | 6.8   | 13.0  | 9.5   | 13.1  | 9.9   | 10.9  | 10.9  | 10.7  |
| H2-L    | 7.0   | 8.5   | 16.2  | 24.2  | 14.6  | 16.4  | 9.0   | 5.9   | 1.2   | 4.3   | 3.1   | 9.2   |
| H2-M3   | 4.3   | 4.5   | 4.6   | 3.2   | 4.5   | 4.3   | 4.1   | 4.1   | 4.4   | 3.8   | 3.6   | 3.7   |
| H2-M5   | 0.1   | 0.1   | 0.1   | 0.2   | 0.0   | 0.2   | 0.1   | 0.0   | 0.1   | 0.0   | 0.1   | 0.1   |
| H2-Q1   | 3.5   | 2.5   | 2.7   | 4.6   | 4.1   | 3.2   | 1.7   | 1.6   | 1.6   | 1.4   | 0.9   | 1.6   |
| H2-Q10  | 1.0   | 0.9   | 0.7   | 1.9   | 1.1   | 1.0   | 0.8   | 0.9   | 0.5   | 0.4   | 0.2   | 0.6   |
| H2-Q2   | 0.2   | 0.0   | 0.2   | 0.2   | 0.1   | 0.1   | 0.1   | 0.1   | 0.1   | 0.1   | 0.0   | 0.1   |
| H2-Q4   | 14.9  | 10.3  | 13.2  | 31.7  | 19.8  | 15.8  | 11.9  | 6.1   | 6.2   | 5.3   | 6.0   | 7.6   |
| H2-Q5   | 1.3   | 0.8   | 0.8   | 2.0   | 1.6   | 1.2   | 0.8   | 0.4   | 0.4   | 0.5   | 0.1   | 0.5   |
| H2-Q6   | 0.0   | 3.0   | 3.2   | 0.2   | 4.3   | 4.3   | 2.2   | 1.9   | 1.8   | 1.4   | 1.1   | 1.7   |
| H2-Q7   | 4.2   | 2.1   | 2.5   | 5.5   | 3.6   | 3.5   | 1.5   | 1.5   | 1.2   | 0.9   | 0.8   | 1.4   |
| H2-Q8   | 5.5   | 0.0   | 1.0   | 6.6   | 1.0   | 0.0   | 0.0   | 0.0   | 0.0   | 0.0   | 0.0   | 0.0   |
| H2-Q9   | 0.0   | 0.2   | 0.9   | 0.0   | 0.2   | 0.0   | 0.4   | 0.0   | 0.0   | 0.2   | 0.0   | 0.0   |
| H2-T10  | 4.6   | 4.5   | 4.1   | 5.7   | 4.4   | 4.5   | 4.1   | 3.7   | 4.0   | 3.3   | 3.3   | 4.9   |
| H2-T22  | 17.1  | 16.2  | 12.6  | 16.1  | 16.1  | 16.3  | 11.4  | 15.2  | 16.0  | 14.9  | 16.3  | 15.9  |
| H2-T23  | 34.4  | 25.4  | 28.4  | 44.3  | 38.0  | 33.1  | 29.0  | 27.8  | 30.0  | 29.5  | 23.5  | 39.1  |
| H2-T24  | 1.7   | 1.3   | 1.3   | 2.0   | 1.8   | 1.5   | 2.3   | 1.4   | 1.3   | 1.2   | 1.6   | 1.4   |
| H2-T3   | 0.0   | 0.0   | 0.0   | 0.0   | 0.0   | 0.0   | 0.0   | 0.0   | 0.0   | 0.0   | 0.0   | 0.0   |
| H2-T9   | 24.1  | 18.6  | 19.4  | 31.0  | 19.6  | 21.8  | 19.6  | 15.9  | 18.5  | 16.9  | 15.8  | 22.8  |
| H3f3a   | 104.7 | 108.0 | 141.8 | 130.0 | 125.3 | 117.6 | 99.9  | 144.3 | 115.0 | 133.0 | 133.6 | 130.1 |
| H3f3b   | 64.6  | 67.6  | 81.8  | 74.9  | 81.8  | 62.4  | 84.5  | 90.8  | 93.7  | 122.9 | 85.4  | 98.9  |
| H60b    | 0.4   | 0.2   | 0.3   | 0.6   | 0.3   | 0.1   | 0.1   | 0.0   | 0.0   | 0.3   | 0.3   | 0.0   |
| H60c    | 0.0   | 0.0   | 0.0   | 0.0   | 0.0   | 0.0   | 0.0   | 0.0   | 0.0   | 0.0   | 0.0   | 0.0   |
| H6pd    | 45.9  | 53.0  | 59.1  | 39.6  | 67.7  | 31.6  | 63.5  | 54.4  | 59.2  | 80.6  | 52.1  | 62.3  |
| Hao     | 0.0   | 0.0   | 0.0   | 0.5   | 0.7   | 0.1   | 0.0   | 0.0   | 0.1   | 0.0   | 0.1   | 0.0   |
| Habp2   | 0.0   | 0.1   | 0.1   | 0.0   | 0.1   | 0.0   | 0.0   | 0.0   | 0.0   | 0.1   | 0.0   | 0.1   |
| Habp4   | 10.8  | 9.0   | 7.9   | 12.6  | 7.1   | 11.3  | 7.9   | 8.2   | 7.6   | 8.2   | 9.7   | 9.4   |
| Hace1   | 3.6   | 4.0   | 3.5   | 3.0   | 3.2   | 3.7   | 3.8   | 3.9   | 4.1   | 4.3   | 4.3   | 3.7   |
| Hacl1   | 7.0   | 8.4   | 7.9   | 5.0   | 5.8   | 7.9   | 5.3   | 6.7   | 6.1   | 5.0   | 5.8   | 6.2   |
| Hadh    | 23.8  | 21.3  | 20.0  | 28.5  | 19.0  | 24.9  | 22.3  | 19.8  | 19.8  | 24.5  | 24.6  | 24.5  |
| Hadha   | 38.1  | 35.2  | 35.5  | 35.7  | 35.7  | 33.0  | 37.0  | 39.2  | 35.4  | 36.3  | 38.0  | 40.2  |
| Hadhb   | 61.3  | 62.6  | 47.3  | 54.8  | 57.5  | 52.2  | 46.3  | 44.0  | 51.4  | 56.4  | 52.3  | 54.2  |
| Hagh    | 22.1  | 18.8  | 15.4  | 23.9  | 17.1  | 24.5  | 16.8  | 17.2  | 18.1  | 18.8  | 24.0  | 20.3  |
| Haghl   | 9.3   | 10.5  | 10.8  | 9.4   | 7.8   | 10.6  | 10.5  | 10.9  | 10.8  | 11.1  | 9.4   | 10.6  |
| Hal     | 0.1   | 0.0   | 0.0   | 0.0   | 0.0   | 0.0   | 0.0   | 0.0   | 0.0   | 0.2   | 0.2   | 0.1   |
| Hand2   | 11.3  | 9.5   | 13.2  | 7.8   | 7.5   | 5.9   | 10.0  | 9.6   | 8.2   | 6.2   | 8.6   | 11.5  |
| Hap1    | 0.3   | 0.1   | 0.2   | 0.3   | 0.1   | 0.1   | 0.0   | 0.1   | 0.0   | 0.1   | 0.0   | 0.1   |
| Hapln1  | 0.0   | 0.0   | 0.0   | 0.0   | 0.0   | 0.0   | 0.0   | 0.0   | 0.0   | 0.0   | 0.0   | 0.0   |
| Hapln3  | 0.0   | 0.1   | 0.3   | 0.3   | 0.2   | 0.2   | 0.1   | 0.0   | 0.1   | 0.1   | 0.0   | 0.2   |
| Hapln4  | 0.2   | 0.1   | 0.1   | 0.3   | 0.1   | 0.3   | 0.1   | 0.1   | 0.1   | 0.1   | 0.1   | 0.1   |
| Harbi1  | 3.1   | 3.7   | 3.0   | 2.7   | 2.7   | 3.1   | 2.6   | 2.9   | 3.5   | 4.1   | 2.9   | 3.3   |
| Hars    | 40.9  | 37.8  | 33.6  | 48.8  | 34.8  | 39.7  | 43.7  | 34.1  | 34.5  | 38.1  | 40.4  | 36.2  |
| Hars2   | 5.0   | 5.4   | 6.0   | 4.9   | 5.0   | 5.4   | 4.8   | 5.3   | 5.6   | 5.4   | 5.1   | 5.8   |
| Has1    | 0.2   | 0.2   | 0.3   | 0.1   | 0.2   | 0.1   | 0.3   | 0.4   | 0.2   | 0.7   | 0.4   | 0.4   |
| Has2    | 2.2   | 1.6   | 1.9   | 2.0   | 4.3   | 0.7   | 4.2   | 4.0   | 6.6   | 3.8   | 4.0   | 4.6   |
| Has2as  | 0.9   | 0.3   | 0.4   | 1.0   | 1.0   | 0.0   | 0.8   | 0.7   | 1.5   | 0.9   | 1.3   | 0.1   |
| Has3    | 0.2   | 0.3   | 0.3   | 0.1   | 0.3   | 0.2   | 0.3   | 0.3   | 0.3   | 0.2   | 0.3   | 0.3   |
| Hat1    | 10.3  | 14.7  | 17.2  | 7.8   | 16.1  | 8.4   | 14.6  | 11.2  | 14.4  | 11.9  | 12.9  | 12.3  |
| Haus1   | 12.7  | 11.3  | 10.5  | 8.4   | 9.7   | 11.3  | 8.9   | 10.0  | 8.7   | 8.9   | 11.0  | 9.8   |
| Haus2   | 7.1   | 7.0   | 5.9   | 6.9   | 5.9   | 6.2   | 5.3   | 5.5   | 5.7   | 5.5   | 6.1   | 4.8   |
| Haus3   | 5.6   | 9.2   | 10.6  | 6.9   | 9.1   | 6.7   | 10.7  | 8.4   | 9.7   | 9.7   | 10.1  | 10.0  |
| Haus4   | 2.5   | 3.4   | 4.1   | 2.4   | 3.4   | 2.5   | 5.1   | 3.4   | 3.4   | 2.6   | 3.5   | 2.4   |

Online Table 1

|         |       |       |       |       |       |       |       |       |       |       |       |       |
|---------|-------|-------|-------|-------|-------|-------|-------|-------|-------|-------|-------|-------|
| Haus5   | 1.4   | 2.1   | 2.3   | 1.4   | 2.1   | 1.3   | 2.0   | 1.9   | 2.1   | 1.3   | 1.7   | 1.3   |
| Haus6   | 3.7   | 4.9   | 4.3   | 2.5   | 5.5   | 2.5   | 4.1   | 3.2   | 3.9   | 3.2   | 4.1   | 3.4   |
| Haus7   | 13.5  | 13.4  | 13.1  | 11.0  | 10.8  | 10.5  | 13.8  | 14.5  | 14.3  | 8.6   | 12.9  | 11.7  |
| Haus8   | 6.0   | 5.5   | 5.6   | 8.1   | 9.7   | 6.3   | 6.1   | 5.2   | 5.9   | 5.1   | 5.9   | 4.5   |
| Havcr2  | 0.4   | 0.0   | 0.1   | 1.6   | 3.9   | 0.1   | 0.7   | 0.1   | 0.1   | 0.2   | 0.1   | 0.3   |
| Hax1    | 67.8  | 59.8  | 57.0  | 71.0  | 53.0  | 65.4  | 52.8  | 65.1  | 56.7  | 49.1  | 55.9  | 54.1  |
| Hbegf   | 12.4  | 6.4   | 5.8   | 10.0  | 8.8   | 8.3   | 10.7  | 4.4   | 7.6   | 11.9  | 9.9   | 10.4  |
| Hbp1    | 40.0  | 44.6  | 48.4  | 40.0  | 38.5  | 39.3  | 35.9  | 45.2  | 43.0  | 48.5  | 44.1  | 51.0  |
| Hbs1l   | 42.7  | 36.3  | 28.0  | 35.4  | 28.0  | 40.6  | 26.9  | 25.9  | 29.0  | 31.1  | 32.8  | 29.8  |
| Hc      | 0.3   | 0.2   | 0.3   | 0.1   | 0.1   | 0.2   | 0.1   | 0.2   | 0.2   | 0.1   | 0.2   | 0.2   |
| Hccs    | 10.5  | 11.4  | 12.8  | 11.2  | 9.4   | 8.6   | 9.6   | 10.2  | 8.9   | 6.9   | 10.1  | 9.7   |
| Hcfc1   | 6.3   | 7.5   | 7.7   | 6.5   | 7.1   | 6.2   | 8.6   | 8.2   | 7.8   | 6.3   | 6.6   | 6.1   |
| Hcfc1r1 | 25.5  | 28.8  | 36.6  | 28.3  | 19.2  | 36.4  | 27.5  | 47.0  | 30.6  | 30.7  | 34.4  | 33.3  |
| Hcfc2   | 11.1  | 11.9  | 10.6  | 10.4  | 9.8   | 9.6   | 9.7   | 9.9   | 11.6  | 9.5   | 10.1  | 10.9  |
| Hck     | 3.2   | 1.5   | 1.2   | 6.8   | 11.8  | 0.7   | 2.7   | 0.6   | 1.2   | 2.3   | 1.5   | 2.3   |
| Hcls1   | 3.9   | 0.4   | 0.5   | 25.1  | 58.3  | 0.4   | 9.1   | 1.0   | 2.0   | 4.3   | 1.2   | 3.1   |
| Hcn1    | 0.0   | 0.0   | 0.0   | 0.0   | 0.0   | 0.0   | 0.0   | 0.0   | 0.0   | 0.0   | 0.0   | 0.0   |
| Hcn2    | 1.5   | 1.3   | 1.0   | 1.2   | 1.0   | 2.3   | 1.6   | 0.8   | 1.3   | 1.1   | 0.9   | 1.3   |
| Hcn3    | 0.0   | 0.0   | 0.0   | 0.0   | 0.0   | 0.0   | 0.0   | 0.0   | 0.0   | 0.1   | 0.0   | 0.1   |
| Hctr1   | 0.0   | 0.1   | 0.0   | 0.0   | 0.0   | 0.0   | 0.0   | 0.0   | 0.0   | 0.0   | 0.1   | 0.0   |
| Hcst    | 0.0   | 0.0   | 0.0   | 0.5   | 0.7   | 0.0   | 0.2   | 0.0   | 0.1   | 0.0   | 0.0   | 0.0   |
| Hdac1   | 17.0  | 18.6  | 24.8  | 16.2  | 20.2  | 16.1  | 20.9  | 24.6  | 20.2  | 20.5  | 20.6  | 23.9  |
| Hdac10  | 2.3   | 2.7   | 2.8   | 2.2   | 2.3   | 2.0   | 2.6   | 2.7   | 3.0   | 2.5   | 2.8   | 2.0   |
| Hdac11  | 7.1   | 5.5   | 6.7   | 7.3   | 4.1   | 9.4   | 4.7   | 4.4   | 4.2   | 5.1   | 4.7   | 5.2   |
| Hdac2   | 45.8  | 44.1  | 44.4  | 41.0  | 36.1  | 40.0  | 45.5  | 42.5  | 37.8  | 42.6  | 51.2  | 47.5  |
| Hdac3   | 25.7  | 23.7  | 24.0  | 23.2  | 20.1  | 25.9  | 22.6  | 25.0  | 21.5  | 20.0  | 23.1  | 23.6  |
| Hdac4   | 3.3   | 4.0   | 3.6   | 4.0   | 3.6   | 3.3   | 3.0   | 3.2   | 3.2   | 3.2   | 3.0   | 2.8   |
| Hdac5   | 12.4  | 15.3  | 13.3  | 13.7  | 10.4  | 14.2  | 10.3  | 13.8  | 13.0  | 10.6  | 10.7  | 12.0  |
| Hdac6   | 3.3   | 3.8   | 4.1   | 3.3   | 3.4   | 3.2   | 3.4   | 4.4   | 3.8   | 4.7   | 3.4   | 3.8   |
| Hdac7   | 8.1   | 12.4  | 11.6  | 6.1   | 8.7   | 8.5   | 11.7  | 13.4  | 12.5  | 9.0   | 9.9   | 7.9   |
| Hdac8   | 5.3   | 5.1   | 5.9   | 5.4   | 4.8   | 4.9   | 4.1   | 6.2   | 4.0   | 6.3   | 6.5   | 5.2   |
| Hdac9   | 0.1   | 0.1   | 0.0   | 0.2   | 0.5   | 0.1   | 0.2   | 0.1   | 0.0   | 0.1   | 0.1   | 0.1   |
| Hdc     | 0.1   | 0.1   | 0.1   | 0.1   | 0.1   | 0.1   | 0.0   | 0.0   | 0.0   | 0.1   | 0.1   | 0.0   |
| Hddc2   | 14.0  | 8.6   | 10.1  | 12.3  | 8.7   | 14.2  | 12.5  | 7.5   | 7.2   | 9.8   | 11.7  | 8.1   |
| Hddc3   | 4.0   | 5.0   | 4.9   | 3.4   | 2.5   | 5.9   | 3.6   | 5.8   | 4.2   | 4.3   | 4.3   | 4.4   |
| Hdgf    | 83.7  | 79.9  | 81.0  | 94.5  | 72.5  | 80.5  | 81.8  | 88.1  | 68.3  | 70.4  | 87.1  | 69.7  |
| Hdgfrp2 | 22.3  | 26.3  | 27.9  | 25.2  | 20.6  | 24.3  | 26.0  | 22.9  | 21.9  | 21.4  | 24.4  | 25.4  |
| Hdgfrp3 | 3.5   | 4.6   | 7.0   | 3.4   | 3.6   | 4.4   | 4.8   | 5.2   | 3.9   | 4.4   | 5.1   | 5.5   |
| Hdhd2   | 20.3  | 18.4  | 17.2  | 22.9  | 18.1  | 21.9  | 18.3  | 16.6  | 17.1  | 18.4  | 20.2  | 18.8  |
| Hdhd3   | 1.6   | 1.8   | 2.1   | 0.7   | 2.2   | 1.7   | 1.5   | 1.8   | 1.8   | 3.1   | 1.4   | 1.3   |
| Hdlbp   | 119.7 | 109.3 | 116.4 | 116.5 | 108.0 | 107.4 | 115.0 | 135.2 | 105.9 | 110.2 | 136.9 | 136.7 |
| Hdx     | 0.4   | 0.5   | 0.6   | 0.2   | 0.5   | 0.4   | 0.5   | 0.6   | 0.5   | 0.6   | 0.7   | 0.5   |
| Heatr1  | 5.9   | 5.7   | 4.8   | 5.5   | 6.9   | 6.2   | 5.1   | 5.5   | 5.0   | 5.2   | 5.7   | 4.6   |
| Heatr2  | 3.7   | 3.3   | 3.1   | 4.1   | 3.0   | 4.0   | 3.6   | 3.1   | 2.6   | 2.6   | 3.0   | 2.5   |
| Heatr3  | 11.6  | 10.2  | 9.1   | 11.3  | 10.1  | 9.0   | 11.6  | 11.2  | 10.7  | 12.5  | 11.2  | 10.6  |
| Heatr5a | 12.5  | 14.0  | 12.5  | 13.2  | 14.0  | 12.9  | 13.0  | 15.0  | 13.8  | 11.9  | 14.0  | 12.5  |
| Heatr5b | 9.6   | 10.6  | 9.6   | 9.6   | 8.5   | 10.3  | 8.7   | 8.9   | 8.4   | 9.4   | 9.0   | 8.6   |
| Heatr6  | 5.8   | 6.1   | 5.2   | 5.2   | 6.2   | 5.4   | 5.6   | 4.9   | 5.4   | 4.9   | 5.7   | 4.8   |
| Heatr8  | 0.0   | 0.0   | 0.0   | 0.0   | 0.0   | 0.0   | 0.0   | 0.0   | 0.0   | 0.0   | 0.0   | 0.0   |
| Hebp1   | 17.5  | 14.0  | 15.4  | 14.1  | 11.9  | 16.2  | 13.8  | 12.0  | 14.8  | 11.4  | 15.7  | 17.3  |
| Hebp2   | 12.4  | 10.1  | 9.1   | 10.5  | 6.7   | 11.3  | 7.7   | 9.3   | 9.1   | 9.8   | 9.3   | 9.0   |
| Heca    | 10.5  | 10.5  | 9.7   | 10.6  | 10.1  | 12.5  | 10.8  | 8.4   | 9.5   | 11.8  | 12.0  | 11.9  |
| Hectd1  | 29.5  | 30.7  | 30.6  | 25.8  | 27.8  | 25.9  | 28.8  | 33.3  | 31.1  | 33.0  | 32.3  | 34.3  |
| Hectd2  | 0.5   | 1.0   | 0.9   | 0.5   | 0.9   | 1.0   | 1.0   | 0.7   | 0.7   | 0.7   | 0.9   | 1.0   |
| Hectd3  | 8.2   | 7.8   | 7.9   | 9.1   | 7.4   | 10.3  | 6.8   | 7.0   | 7.5   | 7.8   | 7.5   | 7.9   |
| Hecw1   | 0.4   | 0.4   | 0.4   | 0.4   | 0.4   | 0.7   | 0.8   | 0.6   | 0.7   | 0.5   | 0.8   | 0.5   |
| Hecw2   | 0.4   | 0.2   | 0.4   | 0.4   | 0.5   | 0.3   | 0.3   | 0.2   | 0.2   | 0.6   | 0.5   | 0.7   |

Online Table 1

|         |       |       |       |       |       |       |       |       |       |       |       |       |
|---------|-------|-------|-------|-------|-------|-------|-------|-------|-------|-------|-------|-------|
| Heg1    | 99.6  | 135.6 | 161.3 | 54.6  | 108.9 | 40.8  | 146.9 | 122.1 | 106.2 | 86.3  | 133.2 | 129.0 |
| Helb    | 2.6   | 3.1   | 3.6   | 2.9   | 3.3   | 2.7   | 2.5   | 3.3   | 2.7   | 2.6   | 2.8   | 2.9   |
| Hells   | 2.2   | 3.5   | 5.4   | 1.1   | 4.2   | 1.2   | 5.0   | 3.3   | 4.0   | 2.6   | 4.0   | 3.2   |
| Helq    | 2.1   | 2.2   | 2.1   | 2.1   | 1.9   | 1.8   | 1.8   | 1.7   | 1.7   | 2.1   | 2.1   | 1.7   |
| Helz    | 3.0   | 4.0   | 3.9   | 3.3   | 3.0   | 3.2   | 3.7   | 3.3   | 3.2   | 3.0   | 3.2   | 2.9   |
| Helz2   | 3.2   | 3.3   | 4.1   | 3.1   | 3.7   | 2.8   | 3.2   | 2.6   | 3.0   | 2.3   | 2.2   | 2.7   |
| Hemk1   | 1.9   | 1.9   | 1.7   | 1.5   | 1.3   | 2.0   | 1.3   | 1.2   | 2.5   | 1.9   | 1.2   | 1.7   |
| Henmt1  | 0.0   | 0.1   | 0.0   | 0.0   | 0.0   | 0.0   | 0.0   | 0.0   | 0.1   | 0.1   | 0.0   | 0.1   |
| Hepacam | 0.0   | 0.0   | 0.0   | 0.0   | 0.0   | 0.1   | 0.0   | 0.0   | 0.0   | 0.0   | 0.0   | 0.0   |
| Heph    | 5.2   | 9.5   | 13.7  | 3.8   | 7.7   | 3.9   | 2.7   | 11.4  | 2.4   | 2.2   | 2.2   | 3.5   |
| Heph1   | 1.1   | 2.0   | 1.6   | 0.4   | 1.3   | 0.3   | 3.0   | 5.8   | 1.9   | 1.3   | 4.6   | 1.9   |
| Herc1   | 6.9   | 6.8   | 6.1   | 6.8   | 7.1   | 5.9   | 6.2   | 6.0   | 5.9   | 5.4   | 6.1   | 5.7   |
| Herc2   | 15.1  | 15.1  | 13.7  | 14.0  | 14.8  | 14.2  | 15.4  | 13.9  | 13.7  | 11.9  | 14.0  | 13.4  |
| Herc3   | 0.7   | 0.6   | 0.4   | 1.0   | 1.6   | 0.8   | 0.7   | 0.4   | 0.6   | 0.5   | 0.3   | 0.7   |
| Herc4   | 8.7   | 9.5   | 9.5   | 8.5   | 8.9   | 8.4   | 8.6   | 8.1   | 9.5   | 9.3   | 9.3   | 8.3   |
| Herc6   | 3.9   | 3.9   | 4.1   | 4.3   | 4.1   | 3.7   | 3.4   | 2.3   | 3.0   | 2.8   | 3.7   | 4.0   |
| Herpud1 | 54.5  | 43.0  | 38.4  | 60.6  | 43.0  | 55.0  | 41.1  | 54.6  | 49.3  | 41.1  | 52.6  | 40.1  |
| Herpud2 | 9.1   | 11.3  | 9.6   | 10.0  | 9.6   | 10.2  | 11.2  | 9.4   | 11.4  | 8.7   | 11.0  | 10.3  |
| Hes1    | 17.3  | 17.7  | 22.7  | 13.4  | 16.6  | 12.4  | 20.7  | 27.5  | 26.0  | 21.0  | 24.7  | 25.9  |
| Hes3    | 0.0   | 0.0   | 0.0   | 0.0   | 0.0   | 0.0   | 0.0   | 0.0   | 0.0   | 0.0   | 0.0   | 0.0   |
| Hes6    | 6.9   | 7.3   | 6.6   | 5.9   | 6.2   | 5.6   | 7.7   | 7.8   | 9.2   | 9.6   | 7.4   | 8.6   |
| Hes7    | 0.0   | 0.0   | 0.1   | 0.0   | 0.0   | 0.1   | 0.1   | 0.2   | 0.1   | 0.0   | 0.2   | 0.1   |
| Hexa    | 151.3 | 94.2  | 92.4  | 223.8 | 168.6 | 212.5 | 102.4 | 88.2  | 92.5  | 136.3 | 105.8 | 134.8 |
| Hexb    | 54.1  | 43.1  | 42.7  | 70.5  | 90.5  | 58.3  | 35.3  | 40.4  | 42.9  | 43.7  | 39.3  | 49.8  |
| Hexdc   | 1.2   | 0.8   | 0.7   | 0.7   | 0.6   | 1.2   | 0.7   | 1.0   | 0.7   | 1.2   | 0.8   | 0.8   |
| Hexim1  | 5.9   | 6.6   | 8.2   | 7.1   | 7.1   | 7.4   | 6.9   | 7.5   | 7.2   | 8.3   | 6.2   | 7.2   |
| Hexim2  | 0.7   | 0.9   | 0.9   | 0.6   | 0.4   | 0.7   | 0.5   | 0.7   | 0.7   | 0.4   | 0.4   | 0.5   |
| Hey1    | 0.4   | 1.1   | 1.3   | 0.3   | 0.4   | 0.2   | 0.3   | 0.5   | 0.5   | 0.5   | 0.5   | 0.5   |
| Hey2    | 1.0   | 1.4   | 2.1   | 0.5   | 1.2   | 0.4   | 2.2   | 2.2   | 2.6   | 1.3   | 2.6   | 1.7   |
| Heyl    | 0.1   | 0.2   | 0.4   | 0.1   | 0.2   | 0.1   | 0.2   | 0.8   | 0.8   | 0.3   | 0.2   | 0.5   |
| Hfe     | 4.0   | 3.1   | 3.2   | 6.6   | 4.1   | 5.5   | 1.2   | 3.8   | 1.6   | 2.0   | 1.7   | 1.9   |
| Hfm1    | 0.1   | 0.0   | 0.0   | 0.0   | 0.0   | 0.0   | 0.0   | 0.0   | 0.0   | 0.0   | 0.0   | 0.0   |
| Hgd     | 0.0   | 0.0   | 0.0   | 0.1   | 0.1   | 0.0   | 0.0   | 0.1   | 0.0   | 0.1   | 0.0   | 0.0   |
| Hgf     | 0.8   | 0.9   | 1.7   | 0.5   | 1.1   | 0.2   | 0.9   | 0.9   | 0.9   | 2.2   | 1.4   | 2.2   |
| Hgfac   | 0.1   | 0.0   | 0.1   | 0.2   | 0.1   | 0.1   | 0.3   | 0.0   | 0.0   | 0.1   | 0.1   | 0.1   |
| Hgs     | 22.6  | 23.3  | 20.6  | 24.0  | 22.2  | 23.4  | 27.1  | 22.6  | 22.7  | 21.9  | 23.5  | 20.2  |
| Hgsnat  | 28.2  | 26.7  | 22.6  | 28.3  | 38.2  | 28.9  | 26.1  | 24.3  | 24.2  | 26.2  | 23.3  | 24.0  |
| Hhat    | 1.6   | 1.6   | 1.4   | 1.3   | 1.6   | 1.3   | 2.2   | 2.8   | 2.5   | 2.0   | 2.2   | 1.8   |
| Hhatl   | 0.0   | 0.1   | 0.0   | 0.0   | 0.0   | 0.0   | 0.0   | 0.0   | 0.0   | 0.1   | 0.0   | 0.0   |
| Hhex    | 0.1   | 0.0   | 0.0   | 0.8   | 0.8   | 0.0   | 0.1   | 0.1   | 0.0   | 0.2   | 0.1   | 0.0   |
| Hhipl1  | 1.3   | 1.8   | 1.6   | 1.6   | 1.4   | 2.2   | 2.0   | 2.3   | 2.3   | 1.7   | 1.8   | 2.0   |
| Hhipl2  | 0.1   | 0.1   | 0.1   | 0.0   | 0.0   | 0.0   | 0.1   | 0.0   | 0.0   | 0.0   | 0.0   | 0.0   |
| Hiat1   | 13.6  | 15.1  | 14.7  | 14.1  | 16.0  | 13.2  | 16.8  | 15.8  | 18.6  | 15.3  | 17.0  | 16.4  |
| Hiatl1  | 19.9  | 19.2  | 17.2  | 20.3  | 20.4  | 19.1  | 19.8  | 16.9  | 19.2  | 18.0  | 21.1  | 19.8  |
| Hibadh  | 33.0  | 35.5  | 29.9  | 34.9  | 31.2  | 37.1  | 27.3  | 29.8  | 31.7  | 33.1  | 31.2  | 31.2  |
| Hibch   | 14.4  | 13.9  | 12.8  | 11.5  | 9.6   | 13.5  | 9.9   | 11.0  | 10.2  | 11.6  | 11.9  | 12.4  |
| Hic1    | 4.4   | 5.8   | 7.0   | 3.4   | 6.5   | 4.4   | 9.1   | 10.1  | 11.4  | 6.5   | 5.4   | 7.1   |
| Hic2    | 0.1   | 0.2   | 0.2   | 0.1   | 0.3   | 0.1   | 0.2   | 0.3   | 0.2   | 0.3   | 0.2   | 0.2   |
| Hid1    | 1.5   | 0.5   | 0.6   | 1.0   | 0.3   | 1.3   | 0.4   | 0.9   | 0.6   | 1.5   | 1.0   | 1.0   |
| Hif1a   | 38.3  | 37.6  | 50.8  | 37.8  | 43.8  | 31.1  | 48.6  | 54.7  | 51.6  | 45.3  | 50.8  | 68.7  |
| Hif1an  | 4.9   | 5.5   | 4.9   | 4.8   | 5.2   | 4.1   | 4.6   | 5.2   | 5.4   | 5.0   | 4.6   | 4.9   |
| Hif3a   | 0.0   | 0.0   | 0.0   | 0.0   | 0.0   | 0.0   | 0.0   | 0.0   | 0.0   | 0.0   | 0.0   | 0.0   |
| Higd1a  | 24.3  | 19.2  | 16.8  | 22.1  | 19.7  | 21.8  | 19.6  | 15.0  | 21.0  | 20.8  | 18.6  | 18.4  |
| Higd2a  | 90.9  | 86.4  | 80.2  | 107.8 | 91.4  | 92.8  | 89.3  | 86.1  | 80.3  | 97.1  | 98.1  | 86.8  |
| Hilpda  | 7.8   | 6.6   | 4.3   | 8.1   | 6.7   | 6.2   | 6.2   | 6.1   | 6.1   | 9.6   | 5.9   | 8.0   |
| Hils1   | 0.1   | 0.1   | 0.0   | 0.0   | 0.1   | 0.1   | 0.0   | 0.1   | 0.0   | 0.0   | 0.0   | 0.2   |
| Hinfp   | 4.1   | 4.2   | 3.8   | 3.8   | 4.3   | 3.7   | 5.0   | 4.1   | 4.6   | 4.6   | 4.5   | 4.3   |

Online Table 1

|           |       |       |       |       |       |       |       |       |       |       |       |       |
|-----------|-------|-------|-------|-------|-------|-------|-------|-------|-------|-------|-------|-------|
| Hint1     | 194.3 | 170.1 | 142.9 | 199.6 | 176.6 | 217.4 | 173.5 | 168.4 | 160.7 | 175.7 | 191.7 | 167.5 |
| Hint2     | 18.6  | 14.1  | 11.1  | 16.3  | 12.4  | 20.7  | 13.1  | 10.3  | 14.5  | 12.2  | 12.2  | 13.1  |
| Hint3     | 14.3  | 14.4  | 11.1  | 7.8   | 12.5  | 14.2  | 7.2   | 11.2  | 12.8  | 12.3  | 11.3  | 10.8  |
| Hip1      | 14.9  | 20.3  | 20.8  | 12.5  | 15.2  | 12.3  | 17.2  | 21.7  | 16.8  | 12.6  | 17.1  | 16.5  |
| Hip1r     | 2.3   | 2.2   | 2.0   | 1.9   | 1.7   | 2.1   | 2.6   | 2.2   | 1.9   | 2.1   | 2.2   | 2.1   |
| Hipk1     | 22.1  | 24.4  | 23.0  | 29.1  | 24.9  | 26.9  | 22.0  | 16.6  | 18.2  | 18.0  | 19.4  | 18.6  |
| Hipk2     | 3.7   | 3.1   | 3.2   | 6.5   | 3.4   | 4.0   | 3.2   | 2.1   | 1.8   | 2.6   | 3.0   | 2.3   |
| Hipk3     | 38.5  | 43.1  | 40.1  | 51.5  | 38.2  | 44.6  | 38.4  | 32.3  | 34.7  | 31.6  | 38.0  | 37.3  |
| Hipk4     | 0.1   | 0.1   | 0.1   | 0.0   | 0.1   | 0.0   | 0.1   | 0.1   | 0.1   | 0.2   | 0.0   | 0.1   |
| Hira      | 2.3   | 2.0   | 2.3   | 2.1   | 2.3   | 2.1   | 2.1   | 2.4   | 2.3   | 2.2   | 2.3   | 2.2   |
| Hirip3    | 1.8   | 2.3   | 3.9   | 1.8   | 2.2   | 2.3   | 3.5   | 2.6   | 2.1   | 1.6   | 2.4   | 2.2   |
| Hist1h1a  | 3.8   | 4.9   | 10.1  | 2.2   | 7.5   | 1.3   | 15.6  | 12.3  | 11.4  | 12.9  | 10.6  | 7.6   |
| Hist1h1b  | 4.4   | 3.8   | 8.2   | 3.4   | 6.7   | 4.3   | 12.5  | 8.7   | 10.1  | 11.9  | 7.0   | 7.6   |
| Hist1h1c  | 99.5  | 121.6 | 95.2  | 87.8  | 82.1  | 98.1  | 80.3  | 85.6  | 99.9  | 138.6 | 89.8  | 105.9 |
| Hist1h1d  | 5.5   | 5.9   | 6.6   | 4.1   | 4.4   | 3.7   | 6.9   | 7.6   | 10.6  | 18.3  | 8.0   | 8.6   |
| Hist1h1e  | 19.2  | 17.3  | 20.6  | 16.0  | 15.7  | 16.3  | 20.1  | 23.3  | 24.8  | 35.3  | 20.1  | 21.6  |
| Hist1h1f  | 0.4   | 0.2   | 0.6   | 0.0   | 0.1   | 0.3   | 0.3   | 0.4   | 0.7   | 1.1   | 0.1   | 0.3   |
| Hist1h2ab | 9.1   | 7.4   | 13.7  | 3.8   | 11.7  | 4.1   | 22.9  | 20.3  | 21.9  | 20.9  | 17.0  | 13.2  |
| Hist1h2ac | 1.5   | 1.4   | 2.4   | 1.2   | 1.9   | 0.9   | 3.6   | 3.1   | 3.6   | 5.1   | 2.6   | 2.6   |
| Hist1h2ad | 8.1   | 7.0   | 12.9  | 4.3   | 9.7   | 2.8   | 20.9  | 18.5  | 17.8  | 19.4  | 14.0  | 11.1  |
| Hist1h2ae | 3.9   | 3.1   | 6.5   | 2.2   | 5.1   | 1.5   | 9.2   | 10.1  | 8.6   | 10.7  | 7.7   | 5.5   |
| Hist1h2af | 6.9   | 5.5   | 11.6  | 3.4   | 8.9   | 2.2   | 15.3  | 13.4  | 12.6  | 13.5  | 9.8   | 7.8   |
| Hist1h2ag | 9.2   | 5.9   | 12.3  | 4.6   | 9.6   | 2.6   | 21.8  | 20.6  | 18.5  | 20.3  | 14.0  | 10.7  |
| Hist1h2ah | 8.4   | 7.2   | 13.9  | 4.5   | 10.3  | 2.9   | 20.6  | 19.7  | 19.5  | 20.8  | 14.8  | 11.6  |
| Hist1h2ai | 8.2   | 7.1   | 12.3  | 4.5   | 10.4  | 2.9   | 20.9  | 18.1  | 18.0  | 18.9  | 14.0  | 11.6  |
| Hist1h2ak | 5.2   | 2.3   | 8.2   | 2.2   | 5.9   | 0.7   | 11.1  | 12.2  | 10.9  | 9.8   | 10.1  | 6.1   |
| Hist1h2an | 6.6   | 6.0   | 10.5  | 3.1   | 8.1   | 2.0   | 15.5  | 14.7  | 16.0  | 15.9  | 10.3  | 9.4   |
| Hist1h2ao | 3.8   | 5.0   | 10.3  | 3.3   | 7.7   | 2.1   | 14.5  | 15.5  | 14.2  | 16.8  | 11.6  | 8.9   |
| Hist1h2ap | 3.2   | 0.0   | 0.2   | 0.0   | 0.2   | 0.5   | 3.1   | 0.0   | 1.4   | 0.2   | 0.0   | 0.0   |
| Hist1h2ba | 29.7  | 26.9  | 22.6  | 20.1  | 27.2  | 19.6  | 25.3  | 26.4  | 29.0  | 36.2  | 25.5  | 20.9  |
| Hist1h2bb | 21.7  | 21.5  | 31.5  | 10.4  | 30.3  | 9.0   | 43.4  | 39.3  | 46.7  | 41.1  | 32.2  | 26.4  |
| Hist1h2bc | 255.4 | 246.3 | 217.0 | 252.6 | 228.3 | 211.1 | 202.4 | 204.9 | 211.5 | 262.0 | 247.7 | 248.8 |
| Hist1h2be | 6.7   | 7.1   | 6.9   | 7.5   | 8.3   | 5.8   | 8.2   | 8.0   | 8.8   | 12.1  | 8.5   | 7.5   |
| Hist1h2bf | 37.0  | 38.6  | 31.4  | 35.3  | 42.5  | 38.9  | 34.2  | 36.5  | 48.4  | 50.9  | 36.9  | 36.7  |
| Hist1h2bg | 43.7  | 51.2  | 47.7  | 39.0  | 50.9  | 37.0  | 49.2  | 50.2  | 57.5  | 69.5  | 51.2  | 46.6  |
| Hist1h2bh | 37.9  | 42.0  | 37.4  | 28.7  | 39.9  | 26.3  | 33.3  | 34.1  | 41.6  | 42.2  | 38.0  | 33.1  |
| Hist1h2bj | 41.1  | 35.5  | 36.4  | 25.8  | 41.7  | 25.5  | 41.1  | 41.7  | 46.2  | 52.1  | 36.5  | 31.8  |
| Hist1h2bk | 39.4  | 36.6  | 36.6  | 27.6  | 46.4  | 23.4  | 47.0  | 46.5  | 56.8  | 57.4  | 41.3  | 35.1  |
| Hist1h2bl | 30.8  | 29.1  | 27.2  | 23.1  | 33.0  | 21.6  | 31.5  | 32.4  | 34.8  | 38.5  | 30.2  | 25.3  |
| Hist1h2bm | 8.8   | 9.6   | 10.3  | 6.5   | 12.1  | 6.5   | 12.2  | 12.2  | 11.8  | 15.9  | 12.4  | 8.7   |
| Hist1h2bn | 27.8  | 27.6  | 30.2  | 19.7  | 33.4  | 14.9  | 41.1  | 37.4  | 43.4  | 46.9  | 31.9  | 25.6  |
| Hist1h2bp | 14.0  | 14.4  | 13.6  | 10.1  | 16.5  | 9.7   | 15.7  | 15.6  | 17.8  | 19.1  | 14.7  | 12.1  |
| Hist1h2bq | 7.0   | 6.5   | 6.5   | 5.5   | 7.0   | 5.0   | 7.2   | 7.1   | 8.0   | 9.7   | 6.6   | 5.8   |
| Hist1h2br | 7.0   | 6.5   | 6.2   | 5.3   | 6.8   | 5.0   | 6.9   | 6.9   | 7.8   | 9.2   | 6.7   | 5.6   |
| Hist1h3a  | 6.0   | 6.8   | 12.3  | 2.8   | 9.0   | 1.8   | 15.4  | 15.4  | 16.4  | 17.7  | 11.4  | 9.1   |
| Hist1h3b  | 10.8  | 10.9  | 23.1  | 6.6   | 18.2  | 5.4   | 31.3  | 31.8  | 33.3  | 33.5  | 21.5  | 18.5  |
| Hist1h3c  | 8.7   | 8.0   | 16.1  | 4.4   | 13.2  | 2.2   | 23.8  | 20.7  | 22.5  | 17.7  | 16.5  | 11.4  |
| Hist1h3d  | 10.2  | 9.3   | 18.3  | 5.8   | 13.8  | 4.8   | 22.2  | 26.7  | 22.2  | 24.1  | 17.4  | 16.2  |
| Hist1h3e  | 7.8   | 6.6   | 13.0  | 5.9   | 9.7   | 3.9   | 19.7  | 19.3  | 18.2  | 28.3  | 13.7  | 11.7  |
| Hist1h3f  | 5.4   | 7.0   | 11.6  | 4.2   | 9.7   | 2.9   | 16.8  | 15.5  | 14.4  | 15.0  | 11.5  | 10.7  |
| Hist1h3g  | 5.1   | 6.0   | 10.3  | 3.4   | 8.2   | 2.0   | 17.0  | 16.0  | 14.7  | 15.4  | 12.3  | 10.9  |
| Hist1h3h  | 11.2  | 11.5  | 22.0  | 6.2   | 17.6  | 4.8   | 27.8  | 31.0  | 31.0  | 34.9  | 21.2  | 20.6  |
| Hist1h3i  | 11.7  | 11.6  | 23.6  | 6.7   | 16.7  | 4.5   | 31.1  | 32.1  | 31.8  | 38.6  | 19.9  | 23.0  |
| Hist1h4a  | 31.4  | 40.3  | 58.4  | 19.3  | 50.1  | 23.2  | 61.7  | 63.7  | 65.4  | 66.5  | 50.1  | 47.0  |
| Hist1h4b  | 28.6  | 37.7  | 55.8  | 19.5  | 46.4  | 23.2  | 64.9  | 59.8  | 68.1  | 60.5  | 49.3  | 46.1  |
| Hist1h4c  | 52.6  | 69.9  | 92.9  | 39.2  | 75.2  | 35.8  | 98.0  | 102.1 | 126.9 | 110.5 | 82.4  | 89.2  |
| Hist1h4d  | 49.5  | 61.8  | 94.3  | 31.4  | 63.0  | 44.6  | 96.9  | 126.4 | 116.3 | 103.0 | 78.1  | 77.9  |

Online Table 1

|              |       |       |       |       |       |       |       |       |       |       |       |       |
|--------------|-------|-------|-------|-------|-------|-------|-------|-------|-------|-------|-------|-------|
| Hist1h4f     | 18.4  | 21.2  | 38.1  | 13.2  | 30.4  | 7.7   | 47.3  | 46.8  | 43.5  | 40.0  | 31.9  | 24.6  |
| Hist1h4h     | 49.7  | 65.1  | 85.5  | 38.8  | 72.1  | 44.2  | 83.1  | 97.9  | 104.9 | 90.4  | 78.9  | 70.4  |
| Hist1h4i     | 22.5  | 26.7  | 34.8  | 22.4  | 30.2  | 18.3  | 33.4  | 36.3  | 39.1  | 45.9  | 31.3  | 35.6  |
| Hist1h4j     | 29.5  | 40.3  | 55.2  | 21.2  | 43.0  | 22.4  | 60.0  | 55.6  | 68.4  | 59.3  | 47.4  | 42.4  |
| Hist1h4k     | 29.5  | 39.3  | 54.9  | 18.6  | 44.1  | 21.9  | 58.2  | 59.2  | 66.0  | 58.9  | 45.8  | 40.8  |
| Hist1h4m     | 43.4  | 44.3  | 48.8  | 30.3  | 49.6  | 33.4  | 46.7  | 79.4  | 72.0  | 82.8  | 54.2  | 64.1  |
| Hist1h4n     | 15.3  | 15.2  | 19.3  | 12.7  | 23.0  | 12.9  | 21.3  | 27.4  | 32.1  | 29.1  | 21.8  | 27.3  |
| Hist2h2aa1   | 13.7  | 11.4  | 11.8  | 10.2  | 13.0  | 9.2   | 16.1  | 17.5  | 18.8  | 22.7  | 16.5  | 15.6  |
| Hist2h2aa2   | 0.2   | 0.5   | 0.2   | 0.7   | 0.5   | 0.3   | 1.9   | 0.5   | 0.4   | 0.8   | 0.8   | 1.3   |
| Hist2h2ab    | 0.9   | 0.5   | 1.2   | 0.4   | 1.2   | 0.8   | 1.2   | 1.6   | 1.8   | 2.0   | 1.6   | 1.3   |
| Hist2h2ac    | 3.2   | 2.1   | 6.5   | 6.5   | 7.6   | 1.1   | 9.5   | 8.2   | 10.3  | 11.1  | 6.1   | 5.6   |
| Hist2h2bb    | 7.0   | 7.0   | 14.2  | 3.5   | 14.5  | 4.1   | 24.2  | 22.7  | 23.8  | 17.3  | 21.0  | 14.1  |
| Hist2h2be    | 0.7   | 0.7   | 0.5   | 0.9   | 0.6   | 0.7   | 0.6   | 0.5   | 0.5   | 0.8   | 0.8   | 0.7   |
| Hist2h3b     | 1.9   | 1.3   | 3.4   | 2.3   | 3.1   | 2.0   | 5.3   | 5.0   | 3.6   | 4.4   | 3.5   | 2.2   |
| Hist2h3c1    | 2.3   | 2.0   | 3.6   | 3.1   | 4.0   | 3.1   | 4.9   | 5.3   | 4.7   | 4.9   | 5.2   | 4.7   |
| Hist2h3c2    | 3.0   | 3.5   | 3.2   | 3.7   | 3.9   | 2.5   | 5.1   | 5.5   | 5.4   | 4.8   | 5.5   | 4.8   |
| Hist2h4      | 6.9   | 5.5   | 10.0  | 5.5   | 7.6   | 2.5   | 8.7   | 13.9  | 12.7  | 12.5  | 10.9  | 9.4   |
| Hist3h2a     | 6.3   | 4.6   | 5.1   | 7.0   | 6.0   | 6.8   | 4.3   | 5.5   | 4.9   | 6.8   | 6.1   | 6.8   |
| Hist3h2bb-ps | 0.2   | 0.0   | 0.0   | 0.0   | 0.1   | 0.0   | 0.1   | 0.0   | 0.1   | 0.0   | 0.0   | 0.1   |
| Hist4h4      | 0.7   | 1.1   | 1.3   | 0.9   | 0.8   | 0.7   | 1.1   | 1.6   | 2.2   | 2.1   | 1.2   | 1.6   |
| Hivep1       | 8.6   | 8.6   | 7.7   | 12.9  | 8.7   | 11.5  | 8.3   | 4.9   | 5.5   | 5.4   | 7.1   | 6.1   |
| Hivep2       | 4.8   | 5.7   | 6.4   | 4.7   | 6.1   | 5.3   | 5.8   | 5.3   | 4.9   | 4.3   | 4.6   | 4.8   |
| Hivep3       | 0.2   | 0.3   | 0.4   | 0.2   | 0.3   | 0.1   | 0.5   | 0.3   | 0.3   | 0.2   | 0.3   | 0.3   |
| Hjurp        | 1.3   | 1.7   | 2.2   | 0.8   | 1.9   | 1.1   | 2.1   | 1.6   | 2.4   | 1.6   | 2.2   | 1.7   |
| Hk1          | 23.9  | 20.8  | 21.1  | 29.6  | 24.0  | 29.3  | 27.6  | 19.6  | 19.9  | 19.2  | 20.7  | 20.4  |
| Hk2          | 6.5   | 5.4   | 5.1   | 5.3   | 7.2   | 3.9   | 5.8   | 4.4   | 5.4   | 6.8   | 6.3   | 6.5   |
| Hk3          | 0.7   | 0.1   | 0.1   | 6.6   | 8.4   | 0.0   | 0.8   | 0.1   | 0.1   | 0.5   | 0.1   | 0.2   |
| Hlcs         | 2.9   | 3.0   | 3.0   | 2.7   | 2.8   | 3.2   | 2.5   | 2.8   | 2.4   | 3.1   | 2.9   | 2.4   |
| Hlf          | 0.0   | 0.1   | 0.1   | 0.0   | 0.1   | 0.0   | 0.0   | 0.0   | 0.0   | 0.0   | 0.0   | 0.0   |
| Hltf         | 13.7  | 13.9  | 13.8  | 13.7  | 12.9  | 13.6  | 11.7  | 11.4  | 11.8  | 13.8  | 14.2  | 16.0  |
| Hlx          | 0.7   | 0.9   | 1.4   | 1.9   | 2.7   | 1.3   | 1.3   | 1.3   | 1.8   | 2.4   | 1.3   | 1.1   |
| Hmbox1       | 6.1   | 6.5   | 5.7   | 5.6   | 5.2   | 5.2   | 5.2   | 4.8   | 4.7   | 5.5   | 5.5   | 4.9   |
| Hmbs         | 12.5  | 13.1  | 12.2  | 11.4  | 11.9  | 12.0  | 11.8  | 15.6  | 12.5  | 13.3  | 14.0  | 11.8  |
| Hmcn1        | 0.0   | 0.0   | 0.1   | 0.0   | 0.1   | 0.0   | 0.0   | 0.1   | 0.0   | 0.1   | 0.1   | 0.0   |
| Hmg20a       | 9.0   | 10.4  | 10.3  | 9.5   | 8.0   | 10.7  | 9.4   | 9.8   | 8.8   | 8.3   | 9.2   | 8.4   |
| Hmg20b       | 12.3  | 15.7  | 13.5  | 13.3  | 13.4  | 13.9  | 14.5  | 14.4  | 14.5  | 15.0  | 15.1  | 13.1  |
| Hmga1        | 3.1   | 3.6   | 0.9   | 7.3   | 8.7   | 6.6   | 6.5   | 4.3   | 4.5   | 5.5   | 2.2   | 5.2   |
| Hmga1-rs1    | 10.5  | 3.2   | 4.4   | 12.0  | 12.0  | 12.5  | 6.9   | 2.4   | 1.1   | 6.2   | 10.1  | 2.7   |
| Hmga2        | 0.5   | 0.3   | 0.3   | 0.5   | 0.4   | 0.6   | 0.6   | 0.5   | 0.4   | 2.0   | 1.4   | 1.1   |
| Hmga2-ps1    | 0.8   | 0.3   | 0.6   | 1.5   | 2.0   | 0.3   | 0.6   | 0.5   | 0.2   | 0.2   | 0.1   | 0.5   |
| Hmgb1        | 66.3  | 71.9  | 109.1 | 86.5  | 68.6  | 73.1  | 81.5  | 81.0  | 68.0  | 75.5  | 82.8  | 94.6  |
| Hmgb1-rs17   | 0.4   | 0.7   | 1.1   | 0.7   | 0.5   | 0.7   | 0.9   | 0.8   | 0.5   | 0.8   | 0.6   | 1.0   |
| Hmgb2        | 2.5   | 4.3   | 9.2   | 1.5   | 5.4   | 1.7   | 8.6   | 4.9   | 5.7   | 4.0   | 6.2   | 5.2   |
| Hmgb3        | 1.1   | 1.5   | 2.0   | 1.0   | 1.7   | 1.0   | 1.5   | 1.7   | 1.2   | 1.8   | 2.1   | 1.3   |
| Hmgcl        | 9.1   | 8.8   | 7.8   | 7.4   | 10.7  | 8.5   | 7.9   | 7.9   | 7.7   | 11.0  | 8.5   | 7.0   |
| Hmgcl1       | 0.1   | 0.1   | 0.0   | 0.0   | 0.0   | 0.1   | 0.0   | 0.0   | 0.0   | 0.2   | 0.1   | 0.0   |
| Hmgcr        | 14.2  | 17.2  | 14.8  | 7.7   | 14.2  | 8.4   | 23.0  | 27.4  | 23.4  | 11.4  | 22.3  | 12.5  |
| Hmgcs1       | 30.1  | 44.0  | 47.0  | 14.6  | 24.7  | 21.7  | 66.7  | 96.1  | 64.1  | 19.9  | 67.0  | 30.2  |
| Hmgcs2       | 1.0   | 0.8   | 1.6   | 0.6   | 0.6   | 1.0   | 0.3   | 0.9   | 0.2   | 0.8   | 0.5   | 0.9   |
| Hmgn1        | 156.0 | 151.9 | 151.8 | 140.0 | 114.4 | 152.7 | 125.9 | 133.5 | 135.9 | 185.8 | 160.8 | 153.7 |
| Hmgn2        | 24.1  | 31.9  | 47.7  | 21.9  | 28.4  | 24.5  | 31.5  | 42.4  | 33.5  | 30.7  | 31.4  | 33.0  |
| Hmgn3        | 32.9  | 33.2  | 45.9  | 36.4  | 31.1  | 37.8  | 43.0  | 40.2  | 32.7  | 30.3  | 44.3  | 42.1  |
| Hmgn5        | 3.2   | 4.8   | 8.6   | 5.0   | 3.3   | 2.4   | 4.9   | 4.7   | 2.1   | 2.1   | 4.9   | 4.0   |
| Hmgxb3       | 7.2   | 6.8   | 5.9   | 6.1   | 6.8   | 7.0   | 7.3   | 6.9   | 7.0   | 7.0   | 6.6   | 6.0   |
| Hmgxb4       | 6.1   | 7.0   | 7.8   | 5.8   | 5.8   | 6.2   | 5.9   | 6.7   | 6.4   | 6.3   | 7.3   | 7.7   |
| Hmha1        | 1.9   | 2.1   | 1.8   | 5.0   | 7.4   | 1.3   | 1.6   | 0.9   | 1.0   | 3.9   | 2.4   | 1.8   |
| Hmmr         | 3.0   | 6.7   | 12.3  | 1.1   | 8.9   | 1.2   | 11.7  | 3.9   | 9.2   | 4.3   | 8.7   | 6.8   |

Online Table 1

|           |       |       |       |       |       |       |       |       |       |       |       |       |
|-----------|-------|-------|-------|-------|-------|-------|-------|-------|-------|-------|-------|-------|
| Hmox1     | 332.1 | 258.9 | 150.3 | 617.9 | 326.1 | 686.4 | 181.4 | 132.0 | 97.8  | 293.1 | 194.0 | 159.2 |
| Hmox2     | 18.0  | 18.8  | 20.3  | 19.5  | 21.1  | 17.7  | 20.3  | 17.8  | 18.2  | 20.2  | 20.1  | 24.7  |
| Hn1       | 47.9  | 39.6  | 33.9  | 46.1  | 48.3  | 43.9  | 46.5  | 38.2  | 45.6  | 42.7  | 45.9  | 36.3  |
| Hn1l      | 15.3  | 15.2  | 15.7  | 17.9  | 21.0  | 15.8  | 20.1  | 15.7  | 17.0  | 15.8  | 20.0  | 14.6  |
| Hnf1a     | 0.0   | 0.0   | 0.1   | 0.1   | 0.1   | 0.0   | 0.0   | 0.0   | 0.0   | 0.0   | 0.0   | 0.0   |
| Hnmt      | 0.9   | 0.5   | 0.7   | 0.9   | 1.8   | 0.5   | 0.6   | 0.4   | 0.2   | 0.3   | 0.2   | 0.3   |
| Hnrnpa0   | 17.8  | 15.3  | 18.1  | 14.1  | 18.7  | 17.0  | 19.9  | 21.4  | 23.7  | 26.1  | 18.0  | 21.5  |
| Hnrnpa1   | 5.0   | 7.3   | 7.9   | 5.7   | 8.9   | 6.4   | 7.5   | 9.2   | 14.1  | 12.6  | 11.7  | 9.1   |
| Hnrnpa2b1 | 70.5  | 73.9  | 94.5  | 75.6  | 81.8  | 64.6  | 71.5  | 80.3  | 69.0  | 76.5  | 77.1  | 88.4  |
| Hnrnpa3   | 9.8   | 11.7  | 11.4  | 9.2   | 11.2  | 9.9   | 9.6   | 8.6   | 10.7  | 10.5  | 10.7  | 11.9  |
| Hnrnpab   | 91.7  | 76.3  | 84.7  | 97.4  | 77.0  | 77.8  | 92.7  | 84.6  | 76.6  | 88.2  | 92.7  | 93.9  |
| Hnrnpc    | 58.8  | 68.9  | 75.4  | 58.4  | 61.7  | 67.3  | 57.6  | 64.6  | 53.1  | 67.6  | 69.4  | 69.2  |
| Hnrnpd    | 0.8   | 1.1   | 1.3   | 0.9   | 1.3   | 0.8   | 1.3   | 1.1   | 1.1   | 1.6   | 1.3   | 1.2   |
| Hnrnpf    | 100.6 | 94.0  | 96.6  | 111.1 | 101.6 | 101.9 | 103.3 | 97.1  | 90.3  | 97.6  | 106.9 | 102.3 |
| HnrnpH1   | 40.1  | 47.7  | 63.1  | 46.3  | 46.9  | 36.5  | 61.9  | 61.4  | 62.4  | 54.0  | 63.0  | 60.0  |
| HnrnpH2   | 32.8  | 33.4  | 41.7  | 41.7  | 33.7  | 34.3  | 34.9  | 34.1  | 32.4  | 35.6  | 39.6  | 46.5  |
| HnrnpH3   | 4.1   | 5.1   | 7.0   | 5.5   | 3.7   | 6.5   | 4.9   | 4.5   | 4.3   | 4.4   | 4.6   | 6.2   |
| Hnrnpk    | 228.1 | 216.7 | 208.6 | 218.8 | 216.6 | 212.2 | 209.6 | 217.4 | 199.7 | 214.2 | 233.6 | 222.2 |
| Hnrnpl    | 47.8  | 52.0  | 54.1  | 44.2  | 51.5  | 41.7  | 54.4  | 68.0  | 57.5  | 57.5  | 54.9  | 55.9  |
| Hnrnpm    | 33.6  | 34.0  | 41.2  | 41.6  | 38.4  | 33.7  | 39.6  | 40.9  | 32.9  | 35.4  | 40.0  | 42.0  |
| Hnrnpr    | 21.6  | 20.9  | 28.4  | 22.5  | 20.2  | 21.7  | 26.3  | 30.4  | 23.8  | 23.1  | 26.6  | 29.9  |
| Hnrnpu    | 73.4  | 76.5  | 86.6  | 73.4  | 80.6  | 63.8  | 85.2  | 89.5  | 78.3  | 86.6  | 91.9  | 97.6  |
| Hnrnpul1  | 34.6  | 32.9  | 38.3  | 35.0  | 30.4  | 32.3  | 38.5  | 39.8  | 33.0  | 35.5  | 38.8  | 39.0  |
| Hnrnpul2  | 10.5  | 11.6  | 13.6  | 10.4  | 11.4  | 10.1  | 12.3  | 12.9  | 11.0  | 12.7  | 12.5  | 14.4  |
| Hnrpdl    | 11.3  | 12.9  | 17.9  | 13.7  | 12.7  | 12.9  | 20.1  | 15.3  | 17.9  | 16.7  | 18.7  | 18.7  |
| Hnrpll    | 12.3  | 13.8  | 15.0  | 11.7  | 11.7  | 12.8  | 12.6  | 13.4  | 14.0  | 13.4  | 13.6  | 14.5  |
| Hoga1     | 1.1   | 1.0   | 1.4   | 1.2   | 0.9   | 1.0   | 1.0   | 1.0   | 1.0   | 0.5   | 0.7   | 0.9   |
| Homer1    | 2.6   | 2.2   | 2.2   | 2.0   | 2.6   | 2.6   | 3.2   | 2.4   | 2.6   | 4.5   | 3.6   | 3.0   |
| Homer2    | 0.1   | 0.1   | 0.3   | 0.1   | 0.1   | 0.1   | 0.1   | 0.2   | 0.1   | 0.1   | 0.1   | 0.1   |
| Homer3    | 17.2  | 14.5  | 12.8  | 19.0  | 16.3  | 18.3  | 16.9  | 11.6  | 13.8  | 17.9  | 14.5  | 15.6  |
| Homez     | 1.4   | 1.6   | 1.4   | 1.0   | 1.0   | 1.2   | 1.0   | 1.2   | 1.1   | 1.1   | 1.1   | 1.1   |
| Hook1     | 0.1   | 0.2   | 0.2   | 0.0   | 0.2   | 0.2   | 0.1   | 0.1   | 0.0   | 0.2   | 0.0   | 0.2   |
| Hook2     | 3.8   | 4.4   | 3.9   | 2.8   | 4.0   | 3.7   | 3.8   | 3.1   | 3.5   | 4.0   | 3.0   | 2.9   |
| Hook3     | 10.9  | 12.8  | 13.5  | 12.3  | 12.0  | 11.3  | 11.5  | 11.6  | 10.9  | 10.9  | 13.8  | 13.6  |
| Hopx      | 0.2   | 0.6   | 0.2   | 0.1   | 0.1   | 0.3   | 0.2   | 0.7   | 0.3   | 1.4   | 0.7   | 0.6   |
| Hormad2   | 0.2   | 0.0   | 0.1   | 0.0   | 0.0   | 0.1   | 0.0   | 0.0   | 0.1   | 0.1   | 0.0   | 0.0   |
| Hoxa1     | 0.6   | 0.5   | 0.2   | 0.6   | 0.5   | 0.3   | 0.3   | 0.4   | 0.4   | 1.1   | 0.5   | 0.5   |
| Hoxa10    | 0.1   | 0.0   | 0.0   | 0.2   | 0.0   | 0.1   | 0.0   | 0.0   | 0.0   | 0.0   | 0.0   | 0.0   |
| Hoxa2     | 0.3   | 0.1   | 0.2   | 0.1   | 0.1   | 0.3   | 0.1   | 0.3   | 0.2   | 1.1   | 0.8   | 0.4   |
| Hoxa3     | 0.0   | 0.1   | 0.0   | 0.0   | 0.0   | 0.0   | 0.0   | 0.1   | 0.0   | 0.6   | 0.2   | 0.2   |
| Hoxa4     | 0.0   | 0.0   | 0.1   | 0.1   | 0.0   | 0.2   | 0.0   | 0.1   | 0.0   | 0.9   | 0.3   | 0.1   |
| Hoxa5     | 0.1   | 0.0   | 0.0   | 0.3   | 0.0   | 0.0   | 0.1   | 0.1   | 0.2   | 5.4   | 2.8   | 1.6   |
| Hoxa6     | 0.0   | 0.0   | 0.0   | 0.0   | 0.0   | 0.0   | 0.0   | 0.0   | 0.1   | 0.1   | 0.5   | 0.1   |
| Hoxa7     | 0.1   | 0.0   | 0.0   | 0.1   | 0.0   | 0.0   | 0.0   | 0.0   | 0.0   | 0.5   | 0.6   | 0.1   |
| Hoxb13    | 0.1   | 0.0   | 0.0   | 0.0   | 0.0   | 0.0   | 0.0   | 0.0   | 0.0   | 0.1   | 0.0   | 0.0   |
| Hoxb2     | 0.9   | 1.2   | 1.7   | 0.7   | 1.6   | 1.0   | 1.3   | 1.5   | 3.7   | 4.1   | 2.5   | 2.5   |
| Hoxb3     | 0.4   | 0.4   | 0.6   | 0.4   | 0.5   | 0.7   | 0.4   | 0.6   | 0.8   | 1.3   | 1.3   | 1.0   |
| Hoxb4     | 1.0   | 1.0   | 0.7   | 1.3   | 0.9   | 1.3   | 0.9   | 0.6   | 1.3   | 2.9   | 1.6   | 1.8   |
| Hoxb5     | 0.0   | 0.0   | 0.0   | 0.0   | 0.0   | 0.0   | 0.0   | 0.0   | 0.1   | 0.2   | 0.1   | 0.0   |
| Hoxb6     | 0.2   | 0.2   | 0.0   | 0.8   | 0.0   | 0.6   | 0.0   | 0.0   | 0.1   | 0.4   | 0.4   | 0.4   |
| Hoxb7     | 0.1   | 0.0   | 0.0   | 0.4   | 0.0   | 0.1   | 0.1   | 0.1   | 0.1   | 0.8   | 1.0   | 0.1   |
| Hoxb8     | 0.0   | 0.0   | 0.0   | 0.0   | 0.0   | 0.0   | 0.0   | 0.0   | 0.0   | 0.0   | 0.1   | 0.0   |
| Hoxb9     | 0.4   | 0.0   | 0.0   | 1.1   | 0.1   | 0.2   | 0.0   | 0.0   | 0.0   | 0.0   | 0.3   | 0.0   |
| Hoxc10    | 0.0   | 0.0   | 0.0   | 0.1   | 0.0   | 0.0   | 0.0   | 0.0   | 0.0   | 0.0   | 0.0   | 0.0   |
| Hoxc13    | 1.9   | 1.0   | 0.8   | 1.9   | 0.9   | 1.0   | 0.7   | 0.1   | 0.3   | 0.7   | 0.7   | 0.4   |
| Hoxc4     | 0.0   | 0.0   | 0.0   | 0.2   | 0.0   | 0.0   | 0.0   | 0.0   | 0.1   | 0.7   | 0.7   | 0.5   |
| Hoxc5     | 0.0   | 0.0   | 0.0   | 0.1   | 0.0   | 0.1   | 0.0   | 0.0   | 0.1   | 0.8   | 0.5   | 0.4   |

Online Table 1



|          |       |       |       |       |       |       |       |       |      |      |       |       |
|----------|-------|-------|-------|-------|-------|-------|-------|-------|------|------|-------|-------|
| Hoxc6    | 0.2   | 0.2   | 0.1   | 0.2   | 0.1   | 0.1   | 0.1   | 0.0   | 0.2  | 1.7  | 2.5   | 0.6   |
| Hoxc8    | 0.1   | 0.0   | 0.0   | 0.0   | 0.0   | 0.0   | 0.0   | 0.0   | 0.0  | 0.1  | 0.4   | 0.1   |
| Hoxc9    | 0.0   | 0.0   | 0.0   | 0.1   | 0.0   | 0.0   | 0.0   | 0.0   | 0.0  | 0.0  | 0.1   | 0.0   |
| Hoxd10   | 0.1   | 0.0   | 0.0   | 0.1   | 0.1   | 0.0   | 0.0   | 0.0   | 0.0  | 0.0  | 0.0   | 0.0   |
| Hoxd3    | 0.0   | 0.0   | 0.0   | 0.1   | 0.0   | 0.0   | 0.1   | 0.0   | 0.1  | 0.1  | 0.1   | 0.1   |
| Hoxd4    | 0.2   | 0.2   | 0.1   | 0.4   | 0.1   | 0.1   | 0.1   | 0.1   | 0.2  | 0.2  | 0.2   | 0.2   |
| Hoxd8    | 2.7   | 2.3   | 3.1   | 4.2   | 2.8   | 2.3   | 3.3   | 4.0   | 3.8  | 3.5  | 2.9   | 3.2   |
| Hoxd9    | 0.9   | 0.5   | 0.6   | 1.0   | 0.7   | 0.9   | 0.5   | 0.4   | 0.5  | 0.6  | 0.5   | 0.5   |
| Hp       | 0.9   | 3.0   | 11.7  | 2.4   | 23.5  | 1.0   | 12.3  | 7.6   | 7.4  | 20.0 | 4.2   | 12.8  |
| Hp1bp3   | 43.9  | 49.8  | 53.1  | 46.1  | 41.4  | 47.6  | 48.5  | 46.7  | 47.5 | 46.1 | 49.6  | 53.0  |
| Hpcal1   | 15.3  | 11.6  | 9.9   | 15.7  | 18.1  | 12.6  | 11.6  | 7.2   | 8.3  | 16.2 | 11.6  | 11.3  |
| Hpcal4   | 0.0   | 0.0   | 0.0   | 0.0   | 0.0   | 0.0   | 0.0   | 0.0   | 0.0  | 0.0  | 0.0   | 0.0   |
| Hpd      | 0.0   | 0.0   | 0.1   | 0.0   | 0.0   | 0.0   | 0.0   | 0.0   | 0.0  | 0.0  | 0.0   | 0.0   |
| Hpdl     | 0.2   | 0.1   | 0.1   | 0.1   | 0.0   | 0.1   | 0.1   | 0.0   | 0.2  | 0.2  | 0.1   | 0.1   |
| Hpgd     | 12.4  | 11.5  | 15.3  | 4.3   | 3.3   | 0.7   | 2.0   | 4.5   | 2.1  | 2.1  | 2.2   | 2.2   |
| Hpgds    | 0.4   | 0.1   | 0.1   | 3.9   | 5.1   | 0.0   | 0.7   | 0.1   | 0.1  | 0.4  | 0.1   | 0.3   |
| Hpn      | 0.1   | 0.2   | 0.1   | 0.2   | 0.2   | 0.0   | 0.1   | 0.1   | 0.2  | 0.1  | 0.1   | 0.1   |
| Hprt     | 61.6  | 50.9  | 41.0  | 62.0  | 61.2  | 54.2  | 41.4  | 35.2  | 41.2 | 61.0 | 50.6  | 51.4  |
| Hps1     | 9.7   | 8.6   | 7.7   | 8.3   | 8.5   | 9.0   | 8.1   | 8.3   | 9.8  | 8.9  | 8.0   | 7.8   |
| Hps3     | 5.9   | 5.5   | 4.9   | 5.4   | 5.9   | 5.4   | 4.9   | 4.3   | 5.8  | 4.7  | 5.1   | 5.3   |
| Hps4     | 4.6   | 4.9   | 4.3   | 4.0   | 4.4   | 4.4   | 4.0   | 3.6   | 3.9  | 3.5  | 3.2   | 3.2   |
| Hps5     | 9.1   | 8.6   | 7.9   | 9.4   | 8.9   | 9.3   | 8.3   | 7.8   | 8.0  | 7.9  | 8.1   | 8.4   |
| Hps6     | 3.5   | 3.3   | 3.5   | 3.5   | 3.5   | 3.9   | 3.7   | 3.1   | 3.8  | 4.5  | 3.3   | 3.2   |
| Hpse     | 1.3   | 1.3   | 1.2   | 1.2   | 1.3   | 1.5   | 1.0   | 0.7   | 0.7  | 0.9  | 0.6   | 1.2   |
| Hpx      | 0.4   | 0.9   | 0.5   | 0.2   | 0.4   | 0.6   | 0.3   | 0.4   | 0.4  | 0.4  | 0.6   | 0.4   |
| Hr       | 1.5   | 1.5   | 1.1   | 1.6   | 0.8   | 2.0   | 1.0   | 1.1   | 0.6  | 0.6  | 0.8   | 0.6   |
| Hras1    | 26.4  | 20.5  | 17.8  | 25.2  | 23.0  | 24.1  | 23.6  | 20.1  | 22.3 | 23.2 | 27.0  | 22.6  |
| Hrasls   | 0.6   | 0.3   | 0.2   | 0.7   | 0.2   | 0.8   | 0.2   | 0.1   | 0.1  | 0.2  | 0.2   | 0.2   |
| Hrc      | 0.0   | 0.0   | 0.0   | 0.0   | 0.0   | 0.0   | 0.0   | 0.0   | 0.0  | 0.0  | 0.0   | 0.0   |
| Hrct1    | 9.1   | 8.4   | 6.3   | 13.3  | 7.1   | 10.1  | 8.5   | 3.6   | 4.6  | 5.3  | 5.9   | 6.6   |
| Hrh1     | 0.1   | 0.1   | 0.1   | 0.3   | 0.2   | 0.1   | 0.1   | 0.1   | 0.1  | 0.2  | 0.1   | 0.1   |
| Hrh2     | 0.0   | 0.1   | 0.0   | 0.0   | 0.0   | 0.0   | 0.1   | 0.0   | 0.0  | 0.0  | 0.0   | 0.0   |
| Hrk      | 0.0   | 0.0   | 0.0   | 0.0   | 0.0   | 0.0   | 0.0   | 0.0   | 0.0  | 0.0  | 0.0   | 0.0   |
| Hrsp12   | 26.7  | 24.7  | 29.3  | 34.0  | 29.9  | 37.7  | 20.8  | 27.1  | 16.0 | 23.2 | 24.2  | 23.6  |
| Hs1bp3   | 8.0   | 8.6   | 7.3   | 8.8   | 8.2   | 10.0  | 7.5   | 6.1   | 7.1  | 8.6  | 6.6   | 7.0   |
| Hs2st1   | 9.5   | 10.1  | 10.2  | 9.7   | 11.1  | 10.9  | 10.2  | 9.2   | 10.7 | 15.3 | 13.0  | 12.4  |
| Hs3st1   | 0.5   | 0.6   | 1.8   | 0.6   | 1.1   | 0.2   | 1.1   | 1.4   | 1.0  | 1.1  | 1.1   | 1.1   |
| Hs3st3a1 | 0.6   | 0.5   | 0.6   | 0.4   | 0.6   | 0.5   | 0.5   | 0.4   | 0.3  | 0.6  | 0.4   | 0.2   |
| Hs3st3b1 | 0.4   | 0.3   | 0.3   | 0.4   | 0.4   | 0.2   | 0.3   | 0.2   | 0.3  | 0.4  | 0.3   | 0.3   |
| Hs3st4   | 0.1   | 0.0   | 0.0   | 0.0   | 0.0   | 0.0   | 0.1   | 0.0   | 0.0  | 0.0  | 0.0   | 0.0   |
| Hs3st6   | 0.3   | 0.3   | 0.1   | 0.2   | 0.3   | 0.2   | 0.0   | 0.0   | 0.1  | 0.1  | 0.1   | 0.0   |
| Hs6st1   | 3.8   | 2.5   | 3.1   | 3.6   | 3.3   | 2.7   | 3.7   | 2.5   | 2.9  | 3.5  | 4.0   | 3.0   |
| Hs6st2   | 35.0  | 35.2  | 36.7  | 37.7  | 43.2  | 37.3  | 50.7  | 40.7  | 64.7 | 55.0 | 61.0  | 65.8  |
| Hs6st3   | 0.0   | 0.1   | 0.1   | 0.0   | 0.0   | 0.0   | 0.1   | 0.0   | 0.0  | 0.0  | 0.1   | 0.0   |
| Hsbp1    | 106.8 | 87.6  | 84.1  | 118.2 | 86.6  | 104.4 | 91.6  | 89.2  | 77.6 | 99.3 | 103.6 | 100.7 |
| Hscb     | 21.4  | 19.1  | 14.0  | 21.1  | 12.7  | 24.3  | 9.0   | 13.8  | 12.1 | 14.2 | 14.5  | 16.4  |
| Hsd11b1  | 216.9 | 265.8 | 246.4 | 320.4 | 227.9 | 232.7 | 101.7 | 116.0 | 83.8 | 67.5 | 69.1  | 72.4  |
| Hsd11b2  | 0.1   | 0.0   | 0.0   | 0.0   | 0.1   | 0.0   | 0.0   | 0.0   | 0.0  | 0.0  | 0.1   | 0.1   |
| Hsd17b1  | 0.3   | 0.3   | 0.1   | 0.2   | 0.2   | 0.5   | 0.2   | 0.0   | 0.1  | 0.2  | 0.2   | 0.3   |
| Hsd17b10 | 31.1  | 30.8  | 28.3  | 34.0  | 25.5  | 29.9  | 27.1  | 36.4  | 30.2 | 27.3 | 31.6  | 25.6  |
| Hsd17b11 | 7.4   | 5.5   | 8.0   | 7.5   | 7.5   | 9.4   | 6.6   | 8.2   | 5.6  | 7.3  | 7.1   | 8.5   |
| Hsd17b12 | 57.2  | 49.4  | 39.0  | 58.3  | 54.1  | 49.5  | 55.2  | 54.0  | 47.0 | 53.2 | 58.9  | 45.0  |
| Hsd17b13 | 0.0   | 0.0   | 0.0   | 0.0   | 0.1   | 0.0   | 0.1   | 0.0   | 0.0  | 0.0  | 0.1   | 0.0   |
| Hsd17b4  | 43.9  | 36.3  | 35.8  | 45.8  | 36.5  | 46.0  | 31.5  | 32.8  | 30.4 | 34.5 | 35.8  | 36.6  |
| Hsd17b6  | 0.0   | 0.0   | 0.0   | 0.0   | 0.0   | 0.0   | 0.0   | 0.0   | 0.0  | 0.0  | 0.0   | 0.0   |
| Hsd17b7  | 12.0  | 15.7  | 14.9  | 7.5   | 9.7   | 6.9   | 20.1  | 23.0  | 18.1 | 7.7  | 20.7  | 8.7   |
| Hsd3b1   | 0.0   | 0.0   | 0.0   | 0.1   | 0.0   | 0.0   | 0.0   | 0.0   | 0.0  | 0.0  | 0.0   | 0.0   |

Online Table 1

|          |        |        |        |        |        |        |        |        |        |        |        |        |
|----------|--------|--------|--------|--------|--------|--------|--------|--------|--------|--------|--------|--------|
| Hsd3b2   | 0.0    | 0.0    | 0.0    | 0.0    | 0.0    | 0.0    | 0.0    | 0.0    | 0.0    | 0.0    | 0.0    | 0.0    |
| Hsd3b3   | 0.0    | 0.1    | 0.1    | 0.0    | 0.0    | 0.0    | 0.0    | 0.0    | 0.1    | 0.0    | 0.0    | 0.1    |
| Hsd3b4   | 0.0    | 0.0    | 0.0    | 0.0    | 0.0    | 0.0    | 0.1    | 0.0    | 0.0    | 0.0    | 0.0    | 0.0    |
| Hsd3b7   | 16.4   | 14.0   | 12.6   | 17.0   | 14.7   | 20.9   | 12.7   | 16.4   | 14.5   | 11.7   | 10.9   | 13.2   |
| Hsd11    | 5.4    | 5.1    | 4.2    | 8.2    | 5.4    | 6.9    | 5.0    | 4.7    | 4.2    | 4.8    | 3.7    | 5.5    |
| Hsd12    | 8.9    | 7.4    | 8.7    | 9.8    | 7.1    | 10.4   | 7.2    | 8.0    | 7.7    | 7.9    | 8.5    | 9.9    |
| Hsf1     | 12.4   | 13.0   | 11.7   | 12.4   | 11.1   | 13.3   | 13.3   | 12.5   | 13.1   | 10.8   | 12.8   | 9.9    |
| Hsf2     | 11.9   | 10.4   | 8.8    | 11.7   | 8.4    | 9.6    | 9.3    | 7.5    | 8.3    | 10.1   | 11.3   | 9.4    |
| Hsf2bp   | 0.0    | 0.0    | 0.1    | 0.0    | 0.0    | 0.0    | 0.0    | 0.0    | 0.0    | 0.0    | 0.1    | 0.0    |
| Hsf3     | 0.1    | 0.1    | 0.2    | 0.0    | 0.1    | 0.2    | 0.0    | 0.1    | 0.0    | 0.0    | 0.0    | 0.0    |
| Hsf4     | 1.6    | 2.6    | 2.3    | 2.1    | 1.7    | 2.1    | 1.9    | 1.7    | 1.6    | 2.7    | 2.3    | 1.3    |
| Hsf5     | 0.0    | 0.0    | 0.0    | 0.0    | 0.0    | 0.0    | 0.0    | 0.0    | 0.0    | 0.0    | 0.0    | 0.0    |
| Hsp90aa1 | 671.6  | 621.3  | 500.3  | 759.3  | 472.5  | 623.2  | 453.6  | 291.8  | 347.9  | 532.7  | 564.2  | 549.3  |
| Hsp90ab1 | 596.7  | 583.6  | 615.3  | 685.4  | 531.1  | 579.0  | 575.9  | 554.8  | 456.5  | 557.6  | 651.7  | 620.1  |
| Hsp90b1  | 838.4  | 735.1  | 727.5  | 846.8  | 631.0  | 660.8  | 744.3  | 776.1  | 697.0  | 780.4  | 910.4  | 915.7  |
| Hspa12a  | 4.0    | 3.1    | 3.2    | 3.8    | 3.2    | 3.7    | 3.2    | 2.9    | 2.4    | 2.5    | 3.2    | 2.9    |
| Hspa12b  | 3.3    | 3.5    | 2.9    | 3.5    | 2.1    | 3.2    | 2.6    | 2.0    | 2.3    | 1.9    | 1.6    | 1.4    |
| Hspa13   | 22.9   | 21.7   | 23.6   | 26.8   | 24.3   | 25.6   | 25.3   | 22.1   | 25.2   | 26.3   | 25.8   | 28.7   |
| Hspa14   | 25.1   | 30.1   | 27.0   | 21.5   | 23.1   | 21.0   | 23.7   | 20.9   | 24.0   | 23.8   | 23.9   | 24.7   |
| Hspa1a   | 5.1    | 7.2    | 7.3    | 3.6    | 7.0    | 3.7    | 11.3   | 5.0    | 7.8    | 14.8   | 10.1   | 8.2    |
| Hspa1b   | 9.7    | 18.4   | 15.2   | 6.7    | 13.5   | 5.4    | 21.1   | 10.1   | 18.5   | 25.6   | 21.1   | 14.8   |
| Hspa1l   | 0.8    | 0.9    | 0.7    | 0.5    | 0.8    | 0.6    | 1.1    | 0.6    | 0.8    | 1.1    | 1.1    | 0.8    |
| Hspa2    | 7.2    | 7.6    | 9.1    | 6.7    | 7.1    | 6.8    | 9.6    | 9.9    | 9.2    | 12.2   | 11.4   | 12.4   |
| Hspa4    | 65.0   | 56.3   | 54.1   | 68.4   | 58.7   | 60.2   | 54.2   | 48.5   | 47.3   | 59.9   | 62.4   | 61.7   |
| Hspa4l   | 15.5   | 18.1   | 14.0   | 16.1   | 12.1   | 15.8   | 10.4   | 8.0    | 10.1   | 13.2   | 14.6   | 11.2   |
| Hspa5    | 646.4  | 464.4  | 391.1  | 655.0  | 423.0  | 505.2  | 377.9  | 499.5  | 460.6  | 471.9  | 501.4  | 475.8  |
| Hspa8    | 1564.8 | 1453.9 | 1318.9 | 1432.8 | 1268.3 | 1313.4 | 1367.4 | 1362.2 | 1258.7 | 1513.0 | 1698.0 | 1513.4 |
| Hspa9    | 157.7  | 100.5  | 85.9   | 161.4  | 94.1   | 159.7  | 99.8   | 118.3  | 92.5   | 105.5  | 125.4  | 105.8  |
| Hspb1    | 385.4  | 534.1  | 421.3  | 461.7  | 304.4  | 423.7  | 378.5  | 360.9  | 441.4  | 515.1  | 430.4  | 408.6  |
| Hspb11   | 34.8   | 32.7   | 45.6   | 24.1   | 24.4   | 31.2   | 31.1   | 29.9   | 29.5   | 31.8   | 37.6   | 44.6   |
| Hspb2    | 7.1    | 6.1    | 7.0    | 3.4    | 3.2    | 5.2    | 3.5    | 7.5    | 6.3    | 10.1   | 4.3    | 6.4    |
| Hspb6    | 2.6    | 2.9    | 2.7    | 2.6    | 2.0    | 2.4    | 2.9    | 2.4    | 1.9    | 1.7    | 2.1    | 2.6    |
| Hspb7    | 5.2    | 5.2    | 3.3    | 7.2    | 3.4    | 6.9    | 5.7    | 4.7    | 3.9    | 2.8    | 3.3    | 3.7    |
| Hspb8    | 71.7   | 54.6   | 40.9   | 86.0   | 44.5   | 89.7   | 49.0   | 35.8   | 44.8   | 60.0   | 55.1   | 45.9   |
| Hspb9    | 0.2    | 0.3    | 0.0    | 0.0    | 0.0    | 0.1    | 0.1    | 0.2    | 0.1    | 0.2    | 0.0    | 0.1    |
| Hspbap1  | 2.3    | 2.9    | 2.1    | 2.0    | 2.0    | 1.9    | 2.1    | 2.1    | 2.3    | 2.5    | 2.3    | 2.3    |
| Hspbpb1  | 6.4    | 5.8    | 3.9    | 7.2    | 6.1    | 7.7    | 5.0    | 5.3    | 5.1    | 5.1    | 5.5    | 4.8    |
| Hspd1    | 156.9  | 139.1  | 109.0  | 153.7  | 119.4  | 147.7  | 121.4  | 98.2   | 105.5  | 134.6  | 152.6  | 132.2  |
| Hspe1    | 176.3  | 169.7  | 151.1  | 194.6  | 135.4  | 190.1  | 125.3  | 131.5  | 132.1  | 165.7  | 176.4  | 164.1  |
| Hspg2    | 16.6   | 26.7   | 26.9   | 12.0   | 23.2   | 16.3   | 31.7   | 21.6   | 25.8   | 19.3   | 15.3   | 11.1   |
| Hsph1    | 37.3   | 53.7   | 48.1   | 46.0   | 41.4   | 42.6   | 30.3   | 27.1   | 24.7   | 40.5   | 36.7   | 35.1   |
| Htatip2  | 33.0   | 30.9   | 25.6   | 33.7   | 30.9   | 44.4   | 25.6   | 28.1   | 28.0   | 29.2   | 27.5   | 30.3   |
| Htatsf1  | 25.0   | 21.4   | 23.3   | 26.6   | 18.7   | 23.0   | 22.4   | 20.0   | 17.8   | 19.4   | 24.3   | 23.7   |
| Htr1d    | 0.0    | 0.1    | 0.1    | 0.1    | 0.1    | 0.2    | 0.0    | 0.0    | 0.1    | 0.1    | 0.0    | 0.1    |
| Htr2a    | 1.2    | 0.4    | 0.4    | 0.7    | 0.6    | 0.6    | 0.7    | 0.4    | 0.6    | 1.6    | 1.2    | 1.1    |
| Htr2b    | 0.2    | 0.2    | 0.2    | 0.5    | 1.2    | 0.3    | 0.3    | 0.2    | 0.1    | 0.3    | 0.2    | 0.3    |
| Htr4     | 0.1    | 0.1    | 0.0    | 0.0    | 0.0    | 0.0    | 0.0    | 0.0    | 0.0    | 0.0    | 0.0    | 0.0    |
| Htr5b    | 0.0    | 0.1    | 0.0    | 0.0    | 0.0    | 0.0    | 0.0    | 0.0    | 0.0    | 0.0    | 0.0    | 0.0    |
| Htr7     | 0.1    | 0.1    | 0.0    | 0.0    | 0.0    | 0.1    | 0.0    | 0.0    | 0.0    | 0.0    | 0.0    | 0.1    |
| Htra1    | 53.3   | 38.2   | 28.9   | 73.5   | 42.9   | 82.4   | 48.0   | 42.8   | 59.5   | 112.7  | 93.8   | 62.9   |
| Htra2    | 35.6   | 30.6   | 23.9   | 31.3   | 28.6   | 38.1   | 31.9   | 24.4   | 31.3   | 26.2   | 29.1   | 29.1   |
| Htra3    | 0.4    | 1.0    | 1.6    | 0.3    | 0.6    | 0.6    | 0.5    | 1.1    | 1.0    | 0.7    | 0.5    | 0.8    |
| Htra4    | 3.3    | 2.2    | 2.8    | 1.3    | 2.3    | 2.0    | 1.6    | 0.5    | 0.8    | 1.0    | 0.6    | 1.5    |
| Htt      | 4.2    | 4.1    | 3.5    | 3.9    | 4.6    | 3.8    | 3.9    | 3.8    | 4.1    | 3.9    | 3.8    | 3.3    |
| Hunk     | 0.1    | 0.1    | 0.1    | 0.0    | 0.1    | 0.0    | 0.0    | 0.0    | 0.0    | 0.2    | 0.0    | 0.1    |
| Hus1     | 2.5    | 2.7    | 2.3    | 2.6    | 2.3    | 2.4    | 2.1    | 2.5    | 2.3    | 2.0    | 2.8    | 2.3    |
| Hus1b    | 0.1    | 0.0    | 0.2    | 0.0    | 0.1    | 0.0    | 0.0    | 0.0    | 0.0    | 0.0    | 0.1    | 0.0    |

Online Table 1

|               |       |       |       |       |       |       |       |       |       |       |       |       |
|---------------|-------|-------|-------|-------|-------|-------|-------|-------|-------|-------|-------|-------|
| Huwe1         | 16.8  | 16.9  | 15.4  | 18.4  | 16.7  | 17.5  | 18.0  | 16.8  | 14.2  | 14.3  | 15.8  | 14.3  |
| Hvcn1         | 13.3  | 9.7   | 7.5   | 29.8  | 16.8  | 28.9  | 5.8   | 6.5   | 4.9   | 4.6   | 3.4   | 5.4   |
| Hyal1         | 9.5   | 7.2   | 7.2   | 7.4   | 7.9   | 9.9   | 5.9   | 4.3   | 4.0   | 6.1   | 5.1   | 4.9   |
| Hyal2         | 8.8   | 9.7   | 8.7   | 9.9   | 9.8   | 10.7  | 9.8   | 8.4   | 8.5   | 12.6  | 9.7   | 8.7   |
| Hyal3         | 0.1   | 0.3   | 0.2   | 0.2   | 0.1   | 0.0   | 0.3   | 0.2   | 0.1   | 0.2   | 0.1   | 0.2   |
| Hydin         | 0.0   | 0.0   | 0.0   | 0.0   | 0.0   | 0.0   | 0.0   | 0.0   | 0.0   | 0.0   | 0.0   | 0.0   |
| Hyi           | 20.3  | 18.5  | 14.4  | 19.3  | 13.1  | 24.3  | 17.9  | 13.0  | 15.1  | 17.6  | 16.7  | 16.0  |
| Hyls1         | 2.9   | 3.4   | 4.2   | 1.5   | 3.5   | 1.3   | 4.4   | 2.9   | 3.5   | 3.2   | 3.9   | 3.0   |
| Hyou1         | 71.3  | 64.0  | 54.2  | 85.7  | 60.0  | 75.5  | 67.7  | 66.5  | 59.8  | 61.2  | 65.0  | 56.7  |
| Hypk          | 91.1  | 74.6  | 96.9  | 108.4 | 69.6  | 89.2  | 97.7  | 96.9  | 73.5  | 76.6  | 84.3  | 99.9  |
| I730028E13Rik | 0.1   | 0.1   | 0.0   | 0.1   | 0.0   | 0.1   | 0.0   | 0.0   | 0.0   | 0.0   | 0.0   | 0.0   |
| I830012O16Rik | 23.0  | 12.0  | 8.4   | 31.0  | 6.0   | 24.5  | 4.6   | 2.9   | 2.5   | 2.6   | 5.3   | 10.4  |
| I830077J02Rik | 0.2   | 0.0   | 0.0   | 0.2   | 0.2   | 0.0   | 0.0   | 0.0   | 0.0   | 0.1   | 0.1   | 0.0   |
| Iah1          | 37.8  | 30.3  | 26.7  | 30.7  | 31.9  | 34.8  | 31.9  | 43.2  | 47.6  | 39.8  | 38.4  | 39.3  |
| Iars          | 24.9  | 18.8  | 15.0  | 23.3  | 19.4  | 21.8  | 19.9  | 20.6  | 19.1  | 18.4  | 22.8  | 15.8  |
| Iars2         | 31.3  | 28.3  | 23.6  | 27.3  | 25.2  | 28.5  | 27.1  | 24.6  | 25.4  | 27.4  | 27.3  | 27.2  |
| Iba57         | 1.0   | 1.0   | 0.7   | 1.7   | 1.3   | 1.1   | 1.1   | 1.1   | 1.2   | 1.3   | 1.0   | 1.1   |
| Ibtk          | 13.5  | 11.2  | 9.8   | 12.1  | 12.2  | 9.8   | 11.2  | 10.8  | 10.6  | 12.3  | 13.4  | 11.6  |
| Ica1          | 12.9  | 11.0  | 7.8   | 13.2  | 8.4   | 12.5  | 8.2   | 6.8   | 5.9   | 8.8   | 9.0   | 7.2   |
| Ica1l         | 1.0   | 0.3   | 0.2   | 1.0   | 0.5   | 0.6   | 0.6   | 0.1   | 0.4   | 0.5   | 0.5   | 0.4   |
| Icam1         | 77.9  | 69.0  | 71.0  | 77.8  | 92.2  | 63.7  | 41.2  | 33.0  | 21.5  | 35.8  | 23.9  | 37.1  |
| Icam2         | 0.8   | 0.2   | 0.6   | 0.3   | 0.3   | 0.2   | 0.4   | 0.9   | 0.5   | 0.0   | 0.1   | 0.2   |
| Icam4         | 0.1   | 0.2   | 0.2   | 0.0   | 0.2   | 0.8   | 0.2   | 0.1   | 0.0   | 0.1   | 0.1   | 0.0   |
| Icam5         | 0.2   | 0.2   | 0.2   | 0.1   | 0.3   | 0.4   | 0.1   | 0.2   | 0.2   | 0.3   | 0.1   | 0.1   |
| Ick           | 4.1   | 4.3   | 4.5   | 4.4   | 3.9   | 4.6   | 4.4   | 4.8   | 4.4   | 4.1   | 5.2   | 4.6   |
| Icmt          | 18.8  | 16.1  | 13.5  | 19.7  | 17.6  | 19.4  | 17.9  | 13.4  | 16.5  | 15.8  | 15.5  | 15.3  |
| Icos          | 0.1   | 0.0   | 0.0   | 0.0   | 0.0   | 0.1   | 0.0   | 0.0   | 0.0   | 0.0   | 0.1   | 0.1   |
| Icosl         | 0.4   | 1.1   | 1.9   | 0.8   | 2.0   | 0.3   | 0.9   | 0.7   | 0.6   | 0.3   | 0.3   | 0.6   |
| Ict1          | 23.9  | 17.2  | 17.1  | 26.5  | 18.3  | 21.6  | 20.2  | 22.3  | 17.9  | 18.0  | 21.8  | 19.1  |
| Id1           | 44.4  | 50.9  | 59.9  | 26.3  | 35.8  | 24.2  | 33.0  | 42.8  | 42.2  | 89.2  | 41.9  | 44.3  |
| Id2           | 22.8  | 24.7  | 41.4  | 16.7  | 24.4  | 12.8  | 21.7  | 28.7  | 25.6  | 29.0  | 23.9  | 29.8  |
| Id3           | 138.1 | 215.8 | 254.8 | 83.0  | 158.8 | 106.1 | 159.4 | 227.7 | 229.1 | 232.7 | 138.7 | 192.0 |
| Id4           | 1.1   | 1.8   | 3.3   | 1.2   | 1.6   | 0.7   | 2.4   | 2.3   | 2.4   | 3.3   | 2.9   | 3.7   |
| Ide           | 39.9  | 32.9  | 32.2  | 40.1  | 32.3  | 42.2  | 31.0  | 36.7  | 31.1  | 39.7  | 43.8  | 39.5  |
| Ide1          | 96.4  | 97.2  | 88.7  | 86.1  | 73.9  | 78.3  | 88.4  | 121.5 | 93.7  | 63.1  | 104.9 | 78.8  |
| Ide2          | 9.3   | 11.3  | 14.8  | 7.0   | 8.0   | 11.3  | 10.7  | 13.4  | 12.5  | 10.3  | 10.5  | 10.7  |
| Ide3a         | 20.6  | 18.8  | 16.4  | 23.3  | 19.0  | 22.5  | 18.5  | 17.0  | 17.1  | 21.1  | 23.1  | 18.1  |
| Ide3b         | 45.1  | 43.3  | 40.5  | 48.6  | 45.2  | 45.9  | 42.5  | 40.5  | 41.2  | 47.0  | 47.6  | 46.7  |
| Ide3g         | 30.4  | 28.1  | 29.3  | 35.1  | 28.2  | 27.9  | 29.6  | 32.3  | 29.2  | 25.2  | 32.6  | 29.3  |
| Idi1          | 20.1  | 24.5  | 25.5  | 5.6   | 15.0  | 9.1   | 46.7  | 57.6  | 40.8  | 11.0  | 53.3  | 18.9  |
| Idi2          | 0.1   | 0.1   | 0.0   | 0.0   | 0.0   | 0.0   | 0.0   | 0.0   | 0.0   | 0.0   | 0.0   | 0.0   |
| Iidnk         | 5.8   | 5.2   | 4.9   | 6.2   | 6.1   | 7.0   | 4.4   | 6.4   | 5.7   | 6.5   | 5.2   | 5.5   |
| Iido1         | 0.1   | 0.0   | 0.1   | 0.1   | 0.1   | 0.0   | 0.1   | 0.1   | 0.0   | 0.1   | 0.0   | 0.1   |
| Iido2         | 0.0   | 0.1   | 0.1   | 0.0   | 0.0   | 0.0   | 0.0   | 0.0   | 0.0   | 0.0   | 0.0   | 0.0   |
| Iids          | 10.0  | 9.1   | 10.0  | 11.3  | 10.7  | 12.5  | 11.1  | 9.5   | 8.4   | 9.1   | 9.9   | 9.8   |
| Iidua         | 6.8   | 6.5   | 6.7   | 9.5   | 7.8   | 9.8   | 6.3   | 7.3   | 7.3   | 5.9   | 6.3   | 5.8   |
| Iier2         | 3.6   | 3.4   | 3.0   | 3.1   | 3.9   | 2.8   | 4.3   | 3.1   | 4.8   | 20.5  | 5.0   | 3.6   |
| Iier3         | 56.2  | 47.0  | 43.5  | 53.8  | 40.6  | 42.9  | 47.1  | 38.3  | 47.3  | 72.2  | 40.7  | 45.9  |
| Iier3ip1      | 35.9  | 34.8  | 33.2  | 34.8  | 35.7  | 36.8  | 35.3  | 33.8  | 37.0  | 38.0  | 42.8  | 43.7  |
| Iier5         | 10.4  | 8.9   | 7.2   | 10.0  | 12.9  | 7.2   | 8.2   | 5.4   | 7.4   | 15.8  | 10.8  | 10.3  |
| Iier5l        | 11.9  | 15.0  | 18.6  | 6.0   | 14.9  | 8.3   | 19.8  | 18.2  | 21.1  | 18.8  | 11.8  | 15.6  |
| Iiffo1        | 9.6   | 10.6  | 9.2   | 8.9   | 8.9   | 9.6   | 9.1   | 6.9   | 8.4   | 7.1   | 8.1   | 8.1   |
| Iiffo2        | 6.3   | 6.3   | 5.8   | 6.0   | 7.3   | 4.6   | 7.2   | 6.0   | 6.9   | 7.2   | 7.0   | 6.4   |
| Iifi203       | 1.5   | 1.1   | 1.9   | 3.0   | 1.6   | 1.4   | 1.0   | 0.7   | 1.0   | 0.5   | 0.9   | 1.8   |
| Iifi204       | 8.7   | 7.0   | 10.7  | 12.1  | 7.2   | 5.8   | 6.4   | 7.4   | 5.4   | 9.8   | 7.5   | 11.6  |
| Iifi205       | 13.5  | 12.6  | 25.6  | 18.0  | 16.4  | 8.9   | 14.0  | 18.2  | 12.4  | 7.6   | 9.1   | 18.6  |
| Iifi2711      | 211.0 | 181.9 | 136.5 | 186.7 | 147.2 | 154.9 | 115.8 | 94.8  | 133.3 | 127.3 | 100.5 | 131.1 |

Online Table 1

|          |        |        |        |        |        |        |        |        |        |        |        |        |
|----------|--------|--------|--------|--------|--------|--------|--------|--------|--------|--------|--------|--------|
| lfi27l2a | 6.8    | 12.1   | 25.0   | 9.5    | 10.3   | 3.1    | 10.8   | 17.4   | 9.8    | 11.4   | 5.8    | 8.3    |
| lfi27l2b | 1.1    | 0.6    | 0.3    | 1.4    | 0.6    | 0.7    | 0.6    | 0.2    | 0.2    | 1.0    | 0.9    | 0.8    |
| lfi30    | 31.0   | 19.5   | 23.4   | 42.0   | 45.5   | 43.8   | 21.2   | 21.7   | 14.9   | 21.8   | 24.1   | 19.2   |
| lfi35    | 21.3   | 17.6   | 17.9   | 23.6   | 19.2   | 18.2   | 19.1   | 16.5   | 19.6   | 16.8   | 14.7   | 21.6   |
| lfi44    | 2.5    | 0.9    | 1.6    | 4.8    | 1.9    | 2.3    | 0.9    | 0.2    | 0.5    | 0.4    | 0.9    | 1.9    |
| lfi47    | 7.3    | 6.5    | 3.5    | 10.3   | 9.5    | 5.9    | 5.3    | 2.1    | 3.9    | 7.8    | 4.4    | 5.1    |
| lfih1    | 7.1    | 5.0    | 6.1    | 8.3    | 6.3    | 6.3    | 5.5    | 4.2    | 4.3    | 4.0    | 4.0    | 7.2    |
| lfit1    | 22.2   | 9.5    | 13.1   | 31.6   | 7.3    | 15.2   | 5.9    | 2.7    | 4.5    | 2.9    | 9.5    | 24.0   |
| lfit2    | 15.1   | 9.0    | 6.8    | 21.5   | 6.1    | 17.5   | 5.8    | 3.6    | 3.9    | 3.8    | 5.3    | 6.9    |
| lfit3    | 153.0  | 66.0   | 39.4   | 173.9  | 27.2   | 164.5  | 15.8   | 7.4    | 7.9    | 11.5   | 20.9   | 37.4   |
| lfitm1   | 3.3    | 6.9    | 6.8    | 3.5    | 3.5    | 6.7    | 3.2    | 3.5    | 4.2    | 7.7    | 2.4    | 3.9    |
| lfitm10  | 0.3    | 0.4    | 0.5    | 0.4    | 0.7    | 0.6    | 0.6    | 0.7    | 0.5    | 0.8    | 0.3    | 0.6    |
| lfitm2   | 316.1  | 335.1  | 392.2  | 317.4  | 322.9  | 307.0  | 326.7  | 348.7  | 317.6  | 395.2  | 346.0  | 336.6  |
| lfitm3   | 482.1  | 405.5  | 440.4  | 710.4  | 511.0  | 407.9  | 394.5  | 316.8  | 311.9  | 369.2  | 338.5  | 404.4  |
| lfitm5   | 0.4    | 0.5    | 0.5    | 0.3    | 0.8    | 0.6    | 0.7    | 0.4    | 0.3    | 0.3    | 0.5    | 0.4    |
| lfitm7   | 0.0    | 0.0    | 0.0    | 0.0    | 0.0    | 0.0    | 0.1    | 0.0    | 0.0    | 0.0    | 0.0    | 0.0    |
| lfnar1   | 12.1   | 12.4   | 13.7   | 12.0   | 14.4   | 10.4   | 13.0   | 13.8   | 13.2   | 12.1   | 11.8   | 12.5   |
| lfnar2   | 70.5   | 73.8   | 91.9   | 80.7   | 90.1   | 61.8   | 72.0   | 67.3   | 60.8   | 59.5   | 59.4   | 69.9   |
| lfngr1   | 46.8   | 59.1   | 80.4   | 51.5   | 58.5   | 54.5   | 56.4   | 48.6   | 53.2   | 40.3   | 37.7   | 49.9   |
| lfngr2   | 57.3   | 38.4   | 34.2   | 62.3   | 58.5   | 54.7   | 41.1   | 27.8   | 28.7   | 40.8   | 37.3   | 33.3   |
| lfnlr1   | 0.3    | 0.3    | 0.2    | 0.2    | 0.1    | 0.3    | 0.1    | 0.1    | 0.2    | 0.2    | 0.1    | 0.4    |
| lfnz     | 0.2    | 0.1    | 0.2    | 0.4    | 0.3    | 0.1    | 0.3    | 0.2    | 0.3    | 0.4    | 0.1    | 0.4    |
| lfrd1    | 21.7   | 14.7   | 10.2   | 21.1   | 18.2   | 17.5   | 16.9   | 15.3   | 16.2   | 14.9   | 17.3   | 11.3   |
| lfrd2    | 3.9    | 3.7    | 3.9    | 3.8    | 3.9    | 3.7    | 4.3    | 4.8    | 4.5    | 3.7    | 4.4    | 3.8    |
| lft122   | 6.5    | 5.7    | 5.6    | 5.8    | 5.6    | 7.5    | 5.3    | 6.3    | 5.1    | 6.2    | 5.9    | 5.8    |
| lft140   | 3.4    | 4.6    | 4.4    | 3.4    | 3.6    | 4.4    | 3.9    | 4.0    | 4.1    | 3.6    | 4.1    | 4.1    |
| lft172   | 8.4    | 9.0    | 9.2    | 9.5    | 7.8    | 10.7   | 7.1    | 7.8    | 7.3    | 6.7    | 7.1    | 7.6    |
| lft20    | 49.0   | 48.7   | 49.4   | 49.7   | 44.0   | 46.4   | 53.7   | 58.0   | 49.7   | 47.9   | 56.9   | 54.9   |
| lft27    | 13.9   | 13.4   | 14.5   | 11.1   | 12.4   | 11.4   | 12.4   | 14.1   | 12.5   | 15.2   | 12.1   | 11.9   |
| lft43    | 41.9   | 39.8   | 40.2   | 32.0   | 34.8   | 34.4   | 37.0   | 43.1   | 43.2   | 40.3   | 42.6   | 46.6   |
| lft46    | 12.0   | 11.4   | 11.7   | 11.1   | 8.9    | 12.4   | 11.7   | 11.4   | 10.6   | 11.2   | 11.9   | 12.1   |
| lft52    | 14.8   | 15.6   | 16.8   | 16.8   | 15.1   | 16.2   | 15.5   | 14.5   | 14.5   | 14.1   | 15.1   | 15.5   |
| lft57    | 8.3    | 7.0    | 7.5    | 10.2   | 6.8    | 10.0   | 6.6    | 6.8    | 5.3    | 7.1    | 8.8    | 8.3    |
| lft74    | 12.5   | 12.7   | 14.0   | 12.4   | 10.0   | 12.6   | 12.8   | 12.8   | 10.5   | 12.8   | 14.7   | 15.3   |
| lft80    | 6.2    | 6.8    | 8.3    | 5.9    | 7.1    | 6.8    | 5.9    | 7.0    | 5.9    | 6.6    | 6.2    | 7.1    |
| lft81    | 8.6    | 9.1    | 9.0    | 7.7    | 6.4    | 10.0   | 7.6    | 7.6    | 7.2    | 7.4    | 8.6    | 9.4    |
| lft88    | 5.3    | 3.9    | 4.9    | 5.7    | 3.6    | 5.5    | 4.2    | 4.4    | 3.7    | 4.3    | 4.7    | 5.1    |
| lgbp1    | 29.1   | 25.6   | 28.6   | 26.8   | 24.5   | 31.2   | 25.3   | 28.5   | 22.2   | 29.8   | 30.3   | 29.8   |
| lgdcc3   | 0.0    | 0.0    | 0.0    | 0.0    | 0.0    | 0.0    | 0.0    | 0.0    | 0.0    | 0.0    | 0.0    | 0.0    |
| lgdcc4   | 4.3    | 5.5    | 5.6    | 3.7    | 4.3    | 6.2    | 4.8    | 4.4    | 4.3    | 3.9    | 3.8    | 3.6    |
| lgf1     | 15.0   | 9.2    | 17.7   | 39.0   | 30.1   | 8.5    | 10.7   | 15.8   | 9.8    | 16.8   | 12.5   | 14.2   |
| lgf1r    | 17.9   | 20.9   | 16.6   | 20.5   | 19.4   | 23.2   | 26.1   | 17.6   | 18.7   | 15.0   | 18.7   | 13.5   |
| lgf2     | 0.2    | 0.3    | 0.4    | 0.4    | 0.2    | 0.1    | 0.1    | 0.1    | 0.2    | 0.3    | 0.2    | 0.2    |
| lgf2bp1  | 0.3    | 0.1    | 0.1    | 0.3    | 0.2    | 0.3    | 0.1    | 0.1    | 0.1    | 0.1    | 0.1    | 0.1    |
| lgf2bp2  | 2.9    | 3.0    | 3.1    | 3.2    | 3.7    | 3.0    | 3.4    | 3.5    | 2.9    | 4.8    | 4.5    | 3.9    |
| lgf2bp3  | 3.0    | 2.0    | 1.1    | 2.4    | 1.5    | 2.1    | 1.1    | 0.8    | 0.9    | 0.6    | 1.1    | 0.8    |
| lgf2r    | 53.5   | 51.5   | 56.4   | 36.3   | 52.7   | 40.9   | 39.4   | 60.9   | 48.5   | 38.2   | 41.8   | 43.8   |
| lgfals   | 0.1    | 0.1    | 0.0    | 0.0    | 0.0    | 0.1    | 0.0    | 0.1    | 0.1    | 0.1    | 0.1    | 0.1    |
| lgfbp2   | 570.4  | 167.1  | 223.0  | 701.9  | 187.6  | 503.0  | 141.3  | 138.0  | 133.7  | 606.1  | 586.5  | 324.4  |
| lgfbp3   | 54.1   | 74.5   | 61.0   | 113.7  | 60.5   | 39.2   | 15.6   | 17.4   | 38.2   | 198.3  | 55.3   | 57.6   |
| lgfbp4   | 129.3  | 106.7  | 297.0  | 14.3   | 20.1   | 11.5   | 28.7   | 167.8  | 64.4   | 127.5  | 107.9  | 155.2  |
| lgfbp5   | 0.3    | 0.1    | 0.8    | 0.2    | 2.7    | 0.1    | 0.9    | 1.6    | 1.0    | 0.9    | 1.1    | 1.2    |
| lgfbp6   | 13.5   | 10.7   | 7.2    | 7.8    | 4.5    | 13.4   | 9.4    | 14.7   | 8.0    | 50.6   | 35.5   | 16.3   |
| lgfbp7   | 1348.9 | 1187.8 | 1265.6 | 1592.1 | 1333.2 | 1847.7 | 1386.5 | 1114.7 | 1195.4 | 1051.3 | 1067.3 | 1238.1 |
| lgflr1   | 0.4    | 0.4    | 0.4    | 0.5    | 0.7    | 0.3    | 0.4    | 0.2    | 0.9    | 0.4    | 0.3    | 0.1    |
| lgfn1    | 0.0    | 0.0    | 0.0    | 0.0    | 0.0    | 0.0    | 0.0    | 0.0    | 0.0    | 0.0    | 0.0    | 0.0    |
| lghmbp2  | 1.2    | 1.2    | 1.4    | 1.3    | 1.3    | 1.5    | 1.4    | 1.5    | 1.6    | 1.5    | 1.2    | 1.3    |

Online Table 1

|          |      |      |      |      |      |      |      |      |      |      |      |      |
|----------|------|------|------|------|------|------|------|------|------|------|------|------|
| Iglon5   | 0.1  | 0.0  | 0.1  | 0.0  | 0.0  | 0.0  | 0.1  | 0.1  | 0.1  | 0.1  | 0.0  | 0.1  |
| Igsf10   | 0.2  | 0.3  | 0.6  | 0.1  | 0.2  | 0.2  | 0.2  | 0.9  | 0.2  | 0.2  | 0.3  | 0.2  |
| Igsf11   | 0.3  | 0.1  | 0.0  | 0.4  | 0.2  | 0.3  | 0.1  | 0.1  | 0.0  | 0.1  | 0.1  | 0.1  |
| Igsf21   | 0.0  | 0.1  | 0.1  | 0.0  | 0.0  | 0.0  | 0.0  | 0.0  | 0.0  | 0.0  | 0.0  | 0.0  |
| Igsf23   | 0.4  | 0.1  | 0.3  | 0.4  | 0.2  | 0.2  | 0.2  | 0.1  | 0.1  | 0.2  | 0.3  | 0.2  |
| Igsf3    | 3.5  | 4.5  | 6.0  | 3.6  | 4.5  | 4.2  | 5.1  | 7.7  | 5.3  | 6.7  | 5.2  | 5.8  |
| Igsf6    | 0.3  | 0.1  | 0.1  | 2.4  | 3.4  | 0.1  | 0.6  | 0.1  | 0.1  | 0.2  | 0.2  | 0.3  |
| Igsf8    | 37.8 | 49.1 | 47.2 | 38.8 | 39.6 | 40.7 | 45.2 | 46.6 | 52.7 | 34.5 | 38.2 | 37.7 |
| Igsf9    | 0.1  | 0.0  | 0.0  | 0.3  | 0.8  | 0.1  | 0.2  | 0.0  | 0.1  | 0.2  | 0.0  | 0.1  |
| Igsf9b   | 2.6  | 1.9  | 1.1  | 2.0  | 1.4  | 1.9  | 1.2  | 0.4  | 0.9  | 1.6  | 1.5  | 0.8  |
| Igtp     | 4.8  | 3.8  | 4.3  | 8.1  | 4.3  | 3.9  | 2.5  | 2.0  | 2.4  | 2.5  | 2.9  | 4.3  |
| Iigp1    | 3.8  | 1.5  | 3.9  | 4.1  | 1.9  | 1.2  | 1.2  | 0.6  | 0.7  | 0.5  | 2.2  | 3.3  |
| Ik       | 78.3 | 71.7 | 82.0 | 95.9 | 63.3 | 75.0 | 70.3 | 65.9 | 51.7 | 66.0 | 71.7 | 82.2 |
| Ikbip    | 68.8 | 61.8 | 66.2 | 69.3 | 57.9 | 68.4 | 68.0 | 60.2 | 61.2 | 66.5 | 71.2 | 75.0 |
| Ikbkap   | 7.8  | 6.4  | 5.9  | 6.5  | 7.3  | 6.5  | 6.6  | 6.8  | 6.7  | 6.5  | 7.1  | 6.2  |
| Ikbkb    | 12.4 | 11.6 | 10.9 | 15.0 | 13.3 | 12.5 | 13.7 | 11.9 | 11.3 | 10.4 | 11.8 | 12.5 |
| Ikbke    | 7.5  | 7.3  | 8.4  | 8.4  | 11.4 | 5.7  | 8.1  | 5.8  | 6.9  | 5.6  | 5.1  | 5.8  |
| Ikbkg    | 28.6 | 25.1 | 16.9 | 41.3 | 24.0 | 41.7 | 25.2 | 14.9 | 20.3 | 21.2 | 22.9 | 22.0 |
| Ikzf1    | 0.1  | 0.0  | 0.0  | 0.9  | 2.0  | 0.0  | 0.3  | 0.0  | 0.0  | 0.2  | 0.0  | 0.1  |
| Ikzf2    | 1.4  | 1.5  | 1.6  | 1.5  | 1.2  | 1.1  | 1.4  | 1.2  | 1.6  | 1.7  | 2.0  | 1.7  |
| Ikzf4    | 0.0  | 0.1  | 0.0  | 0.0  | 0.0  | 0.0  | 0.0  | 0.0  | 0.0  | 0.1  | 0.0  | 0.0  |
| Ikzf5    | 3.8  | 4.9  | 5.3  | 5.1  | 4.5  | 4.7  | 6.4  | 5.5  | 5.2  | 4.3  | 6.5  | 6.1  |
| Il10     | 0.0  | 0.0  | 0.0  | 0.1  | 0.0  | 0.0  | 0.1  | 0.0  | 0.0  | 0.0  | 0.0  | 0.0  |
| Il10ra   | 0.4  | 0.0  | 0.0  | 3.6  | 7.3  | 0.0  | 0.9  | 0.1  | 0.2  | 0.5  | 0.2  | 0.3  |
| Il10rb   | 16.6 | 15.8 | 14.1 | 19.9 | 24.9 | 11.9 | 15.4 | 14.0 | 15.8 | 21.0 | 16.3 | 16.4 |
| Il11     | 0.3  | 0.5  | 0.5  | 0.2  | 0.2  | 0.3  | 0.6  | 0.4  | 0.6  | 0.4  | 0.4  | 0.6  |
| Il11ra1  | 44.7 | 47.7 | 62.5 | 42.5 | 34.9 | 37.5 | 38.1 | 62.3 | 39.8 | 32.0 | 30.0 | 38.9 |
| Il12a    | 0.1  | 0.1  | 0.1  | 0.0  | 0.0  | 0.1  | 0.2  | 0.0  | 0.1  | 0.0  | 0.0  | 0.0  |
| Il12rb1  | 0.0  | 0.0  | 0.0  | 0.0  | 0.0  | 0.0  | 0.0  | 0.0  | 0.0  | 0.0  | 0.0  | 0.0  |
| Il12rb2  | 0.1  | 0.1  | 0.1  | 0.4  | 0.1  | 0.0  | 0.2  | 0.0  | 0.1  | 0.2  | 0.0  | 0.0  |
| Il13ra1  | 3.4  | 3.7  | 4.5  | 3.2  | 5.1  | 2.4  | 3.5  | 4.2  | 3.5  | 3.5  | 2.7  | 3.9  |
| Il13ra2  | 0.3  | 0.0  | 0.0  | 0.4  | 0.2  | 0.0  | 0.1  | 0.0  | 0.1  | 0.0  | 0.0  | 0.0  |
| Il15     | 2.5  | 2.1  | 2.9  | 2.5  | 3.5  | 1.5  | 2.0  | 1.3  | 3.5  | 1.9  | 1.6  | 2.3  |
| Il15ra   | 0.6  | 0.5  | 0.9  | 0.6  | 0.7  | 1.0  | 0.6  | 0.5  | 0.3  | 1.0  | 1.2  | 0.4  |
| Il16     | 16.3 | 13.7 | 17.4 | 8.8  | 8.3  | 8.9  | 8.9  | 9.7  | 4.9  | 8.4  | 9.4  | 10.2 |
| Il17b    | 0.1  | 0.1  | 0.1  | 0.0  | 0.1  | 0.1  | 0.0  | 0.1  | 0.0  | 0.0  | 0.0  | 0.0  |
| Il17c    | 0.0  | 0.0  | 0.2  | 0.0  | 0.1  | 0.0  | 0.1  | 0.1  | 0.1  | 0.0  | 0.1  | 0.0  |
| Il17d    | 1.8  | 1.5  | 2.0  | 2.9  | 1.5  | 2.2  | 2.7  | 2.2  | 2.2  | 1.4  | 1.7  | 1.4  |
| Il17ra   | 14.2 | 16.0 | 14.7 | 15.4 | 13.8 | 13.1 | 16.5 | 14.3 | 13.3 | 10.7 | 11.9 | 11.6 |
| Il17rb   | 0.1  | 0.1  | 0.1  | 0.1  | 0.1  | 0.2  | 0.2  | 0.2  | 0.1  | 0.0  | 0.0  | 0.1  |
| Il17rc   | 11.5 | 11.5 | 10.3 | 8.1  | 8.9  | 9.7  | 11.5 | 12.0 | 13.0 | 10.5 | 9.4  | 9.3  |
| Il17rd   | 2.0  | 2.3  | 1.7  | 2.0  | 2.0  | 2.6  | 1.9  | 1.9  | 2.0  | 2.4  | 2.0  | 1.9  |
| Il17re   | 0.7  | 0.4  | 0.4  | 0.1  | 0.1  | 0.0  | 0.1  | 0.2  | 0.1  | 1.7  | 1.0  | 0.6  |
| Il18     | 3.1  | 1.9  | 1.6  | 1.1  | 1.6  | 1.6  | 2.6  | 1.7  | 1.9  | 12.7 | 7.1  | 3.2  |
| Il18bp   | 0.9  | 0.8  | 1.2  | 1.4  | 1.5  | 1.0  | 1.1  | 0.9  | 0.6  | 0.8  | 0.4  | 0.9  |
| Il18r1   | 0.0  | 0.0  | 0.0  | 0.0  | 0.0  | 0.0  | 0.0  | 0.0  | 0.0  | 0.2  | 0.1  | 0.0  |
| Il18rap  | 0.2  | 0.0  | 0.0  | 0.1  | 0.1  | 0.1  | 0.2  | 0.0  | 0.1  | 0.2  | 0.2  | 0.2  |
| Il1a     | 0.1  | 0.2  | 0.1  | 0.2  | 0.0  | 0.1  | 0.1  | 0.0  | 0.0  | 0.0  | 0.1  | 0.0  |
| Il1b     | 0.1  | 0.1  | 0.0  | 0.2  | 0.5  | 0.0  | 0.1  | 0.0  | 0.0  | 0.1  | 0.0  | 0.0  |
| Il1f10   | 0.0  | 0.0  | 0.0  | 0.0  | 0.0  | 0.0  | 0.0  | 0.0  | 0.0  | 0.2  | 0.3  | 0.1  |
| Il1f9    | 0.7  | 0.8  | 0.5  | 0.9  | 1.7  | 0.5  | 0.6  | 0.2  | 0.3  | 0.4  | 0.0  | 0.2  |
| Il1r1    | 7.9  | 18.8 | 41.6 | 7.8  | 15.3 | 4.9  | 14.2 | 33.3 | 20.3 | 26.7 | 15.4 | 19.7 |
| Il1r2    | 0.2  | 0.4  | 1.1  | 0.0  | 0.4  | 0.2  | 0.3  | 0.5  | 0.3  | 0.2  | 0.1  | 0.5  |
| Il1rap   | 24.8 | 34.0 | 44.9 | 21.8 | 33.9 | 15.4 | 34.4 | 26.7 | 35.6 | 19.3 | 24.0 | 36.1 |
| Il1rapl1 | 0.1  | 0.1  | 0.1  | 0.0  | 0.1  | 0.1  | 0.0  | 0.2  | 0.1  | 0.1  | 0.1  | 0.2  |
| Il1rapl2 | 0.0  | 0.0  | 0.0  | 0.0  | 0.0  | 0.0  | 0.0  | 0.0  | 0.0  | 0.0  | 0.0  | 0.0  |
| Il1rl1   | 0.2  | 0.2  | 0.2  | 0.1  | 0.3  | 0.0  | 0.3  | 0.1  | 0.2  | 0.5  | 0.4  | 0.3  |

Online Table 1

|         |       |       |       |       |       |       |       |       |       |       |       |       |
|---------|-------|-------|-------|-------|-------|-------|-------|-------|-------|-------|-------|-------|
| ll1r12  | 3.2   | 3.3   | 4.2   | 2.9   | 3.9   | 1.7   | 4.5   | 5.5   | 3.9   | 4.0   | 3.6   | 4.4   |
| ll1rn   | 0.1   | 0.0   | 0.0   | 1.9   | 1.4   | 0.0   | 0.2   | 0.1   | 0.0   | 1.0   | 0.6   | 0.5   |
| ll20ra  | 0.0   | 0.0   | 0.0   | 0.0   | 0.0   | 0.0   | 0.0   | 0.0   | 0.0   | 0.1   | 0.1   | 0.1   |
| ll20rb  | 0.2   | 0.3   | 0.2   | 0.1   | 0.3   | 0.2   | 0.2   | 0.3   | 0.3   | 0.2   | 0.4   | 0.3   |
| ll21r   | 0.3   | 0.0   | 0.0   | 1.5   | 2.9   | 0.0   | 0.3   | 0.0   | 0.1   | 0.2   | 0.1   | 0.2   |
| ll22ra1 | 0.0   | 0.0   | 0.0   | 0.0   | 0.0   | 0.0   | 0.0   | 0.1   | 0.0   | 0.2   | 0.1   | 0.0   |
| ll22ra2 | 0.0   | 0.0   | 0.1   | 0.0   | 0.0   | 0.0   | 0.0   | 0.0   | 0.0   | 0.0   | 0.0   | 0.0   |
| ll23a   | 0.1   | 0.2   | 0.1   | 0.2   | 0.2   | 0.2   | 0.1   | 0.0   | 0.1   | 0.2   | 0.1   | 0.1   |
| ll23r   | 0.0   | 0.0   | 0.0   | 0.0   | 0.1   | 0.1   | 0.0   | 0.0   | 0.0   | 0.0   | 0.0   | 0.0   |
| ll27ra  | 3.8   | 4.3   | 5.3   | 4.3   | 5.9   | 5.1   | 7.7   | 5.1   | 8.1   | 4.0   | 3.6   | 5.5   |
| ll2ra   | 0.0   | 0.0   | 0.0   | 0.0   | 0.0   | 0.0   | 0.0   | 0.0   | 0.0   | 0.0   | 0.0   | 0.0   |
| ll2rb   | 0.3   | 0.2   | 0.2   | 0.1   | 0.1   | 0.3   | 0.1   | 0.2   | 0.1   | 0.0   | 0.2   | 0.1   |
| ll2rg   | 1.4   | 0.4   | 0.3   | 6.9   | 11.0  | 0.6   | 3.2   | 1.0   | 0.8   | 0.9   | 0.4   | 0.6   |
| ll31ra  | 0.1   | 0.1   | 0.1   | 0.0   | 0.0   | 0.0   | 0.0   | 0.0   | 0.0   | 0.1   | 0.0   | 0.0   |
| ll33    | 0.2   | 1.0   | 8.2   | 0.2   | 2.2   | 0.1   | 2.0   | 12.7  | 13.4  | 15.4  | 5.0   | 24.5  |
| ll34    | 12.4  | 16.3  | 15.9  | 12.3  | 20.5  | 14.6  | 17.4  | 11.9  | 12.3  | 10.6  | 11.1  | 8.6   |
| ll3ra   | 13.3  | 10.1  | 11.3  | 11.3  | 11.9  | 11.8  | 10.6  | 11.6  | 13.3  | 10.3  | 7.9   | 8.1   |
| ll4i1   | 0.0   | 0.0   | 0.0   | 0.0   | 0.0   | 0.0   | 0.0   | 0.0   | 0.0   | 0.1   | 0.0   | 0.0   |
| ll4ra   | 27.0  | 28.0  | 32.2  | 33.9  | 46.1  | 23.3  | 73.3  | 45.1  | 51.4  | 53.2  | 46.2  | 58.4  |
| ll5ra   | 0.0   | 0.0   | 0.0   | 0.0   | 0.0   | 0.0   | 0.0   | 0.0   | 0.0   | 0.0   | 0.0   | 0.0   |
| ll6     | 80.2  | 107.5 | 102.9 | 46.8  | 120.3 | 27.4  | 91.5  | 75.8  | 89.6  | 60.2  | 67.6  | 91.2  |
| ll6ra   | 1.1   | 1.9   | 2.5   | 1.3   | 2.1   | 0.9   | 1.7   | 2.6   | 1.7   | 1.2   | 1.5   | 1.8   |
| ll6st   | 191.1 | 244.8 | 364.8 | 153.2 | 176.5 | 151.0 | 212.6 | 280.8 | 251.9 | 129.9 | 162.1 | 218.7 |
| ll7     | 1.0   | 1.1   | 0.8   | 1.8   | 1.7   | 1.4   | 1.5   | 0.4   | 0.6   | 0.4   | 0.7   | 1.0   |
| ll7r    | 0.1   | 0.0   | 0.0   | 2.7   | 4.5   | 0.0   | 0.4   | 0.0   | 0.1   | 0.2   | 0.0   | 0.2   |
| ll8     | 0.0   | 0.0   | 0.1   | 0.0   | 0.0   | 0.0   | 0.0   | 0.0   | 0.0   | 0.0   | 0.0   | 0.0   |
| lldr2   | 3.3   | 1.4   | 1.4   | 1.7   | 0.9   | 1.7   | 1.7   | 1.6   | 2.5   | 10.5  | 5.7   | 5.7   |
| llf2    | 19.9  | 18.9  | 23.4  | 17.3  | 19.3  | 16.9  | 22.3  | 20.2  | 21.1  | 21.9  | 24.3  | 22.4  |
| llf3    | 11.9  | 12.8  | 13.8  | 12.0  | 11.7  | 11.9  | 13.5  | 15.0  | 12.4  | 14.0  | 13.5  | 13.2  |
| llk     | 57.3  | 53.2  | 47.9  | 64.8  | 53.5  | 48.7  | 58.8  | 56.0  | 58.7  | 52.4  | 65.5  | 55.3  |
| llkap   | 20.1  | 20.5  | 21.1  | 21.6  | 18.5  | 22.9  | 21.7  | 17.9  | 21.0  | 22.7  | 20.4  | 23.1  |
| llvbl   | 30.0  | 25.5  | 18.9  | 26.1  | 23.2  | 23.5  | 30.1  | 24.6  | 28.5  | 32.0  | 29.0  | 28.7  |
| lmp1    | 26.5  | 27.3  | 20.7  | 24.7  | 21.4  | 24.9  | 18.2  | 21.9  | 26.5  | 25.8  | 27.2  | 23.9  |
| lmp2    | 1.4   | 1.6   | 1.6   | 2.7   | 1.1   | 1.7   | 1.3   | 1.3   | 1.4   | 1.5   | 1.1   | 0.7   |
| lmt     | 38.7  | 32.8  | 30.1  | 42.8  | 35.9  | 36.2  | 38.1  | 38.6  | 32.4  | 33.7  | 39.3  | 33.8  |
| lmp3    | 30.8  | 25.6  | 23.0  | 24.4  | 27.6  | 25.1  | 24.0  | 26.5  | 27.1  | 38.1  | 27.1  | 25.5  |
| lmp4    | 9.2   | 8.2   | 8.4   | 10.2  | 10.7  | 8.5   | 11.0  | 9.8   | 8.9   | 8.7   | 9.8   | 8.9   |
| lmpa1   | 13.5  | 12.8  | 11.0  | 11.1  | 13.1  | 14.4  | 13.6  | 11.2  | 12.9  | 13.3  | 13.9  | 13.4  |
| lmpa2   | 1.4   | 1.7   | 2.5   | 1.5   | 2.6   | 1.9   | 2.9   | 2.2   | 2.7   | 2.3   | 3.0   | 2.0   |
| lmpact  | 82.5  | 62.4  | 54.6  | 108.6 | 63.0  | 99.2  | 63.0  | 44.5  | 48.9  | 62.5  | 66.9  | 70.4  |
| lmpad1  | 25.6  | 23.4  | 25.2  | 22.9  | 24.9  | 25.5  | 25.6  | 24.5  | 26.1  | 28.3  | 28.5  | 28.1  |
| lmpdh1  | 11.7  | 11.9  | 11.0  | 14.3  | 13.8  | 11.9  | 12.6  | 12.9  | 13.3  | 9.8   | 11.6  | 9.5   |
| lmpdh2  | 56.3  | 50.5  | 53.2  | 40.2  | 49.3  | 50.3  | 52.2  | 47.9  | 51.1  | 58.4  | 53.8  | 54.4  |
| lmpg1   | 0.0   | 0.0   | 0.0   | 0.0   | 0.0   | 0.0   | 0.0   | 0.0   | 0.0   | 0.0   | 0.0   | 0.0   |
| lmpg2   | 0.1   | 0.1   | 0.1   | 0.0   | 0.1   | 0.0   | 0.0   | 0.1   | 0.1   | 0.1   | 0.1   | 0.1   |
| lna     | 0.1   | 0.0   | 0.0   | 0.0   | 0.1   | 0.0   | 0.1   | 0.0   | 0.0   | 0.0   | 0.1   | 0.1   |
| lnadl   | 0.9   | 0.6   | 0.6   | 0.6   | 0.6   | 0.6   | 1.0   | 0.8   | 0.6   | 1.2   | 1.0   | 1.0   |
| lnca1   | 1.5   | 1.2   | 1.7   | 0.9   | 1.3   | 2.1   | 0.8   | 2.2   | 1.1   | 1.2   | 0.7   | 1.4   |
| lncnp   | 3.1   | 6.0   | 9.9   | 4.2   | 8.0   | 2.7   | 11.0  | 5.4   | 6.4   | 3.7   | 6.7   | 5.1   |
| lnf2    | 4.0   | 4.3   | 2.9   | 4.2   | 4.9   | 4.6   | 5.8   | 3.3   | 4.4   | 7.6   | 5.1   | 4.4   |
| lng1    | 6.7   | 7.4   | 7.7   | 6.6   | 7.2   | 6.7   | 8.3   | 8.4   | 8.6   | 8.2   | 8.8   | 8.7   |
| lng2    | 2.2   | 2.5   | 2.5   | 1.7   | 2.3   | 2.1   | 2.0   | 2.2   | 1.6   | 2.1   | 2.4   | 2.1   |
| lng3    | 1.9   | 2.3   | 2.4   | 2.1   | 1.7   | 1.7   | 2.1   | 2.2   | 1.9   | 2.0   | 2.6   | 2.5   |
| lng4    | 19.4  | 18.2  | 19.7  | 18.3  | 17.6  | 16.9  | 17.0  | 17.5  | 18.3  | 21.0  | 17.1  | 18.8  |
| lng5    | 3.5   | 3.8   | 3.8   | 2.8   | 3.6   | 3.3   | 3.9   | 3.9   | 3.9   | 3.9   | 4.2   | 3.8   |
| lnha    | 0.3   | 0.4   | 0.3   | 0.3   | 0.0   | 0.6   | 0.6   | 0.4   | 0.5   | 0.4   | 0.3   | 0.4   |
| lnhba   | 37.0  | 36.4  | 28.7  | 48.6  | 30.8  | 46.1  | 56.5  | 24.9  | 36.0  | 32.9  | 50.3  | 41.0  |

Online Table 1

|        |      |      |      |      |      |      |      |       |      |      |      |      |
|--------|------|------|------|------|------|------|------|-------|------|------|------|------|
| Inhbb  | 21.5 | 38.2 | 50.7 | 15.0 | 38.9 | 16.4 | 51.1 | 30.4  | 46.9 | 43.8 | 37.2 | 61.0 |
| Inip   | 3.6  | 3.1  | 3.8  | 4.4  | 3.7  | 3.3  | 3.4  | 3.0   | 3.4  | 3.0  | 3.1  | 3.4  |
| Inmt   | 0.1  | 0.0  | 0.2  | 0.1  | 0.0  | 0.0  | 0.1  | 0.1   | 0.0  | 0.0  | 0.0  | 0.1  |
| Ino80  | 5.4  | 5.1  | 5.3  | 6.1  | 5.5  | 5.4  | 5.9  | 5.7   | 5.8  | 5.7  | 5.6  | 5.4  |
| Ino80b | 8.5  | 7.4  | 7.7  | 6.3  | 6.5  | 7.2  | 7.5  | 7.9   | 6.5  | 7.5  | 6.6  | 8.2  |
| Ino80c | 9.5  | 7.4  | 6.8  | 10.3 | 7.9  | 7.6  | 8.2  | 7.7   | 7.1  | 6.8  | 8.4  | 9.4  |
| Ino80d | 1.2  | 1.6  | 1.7  | 1.2  | 1.6  | 1.4  | 1.4  | 1.5   | 1.4  | 1.4  | 1.3  | 1.4  |
| Ino80e | 8.7  | 7.9  | 8.9  | 11.7 | 11.0 | 11.9 | 11.1 | 9.8   | 8.0  | 10.5 | 10.9 | 8.5  |
| Inpp1  | 11.1 | 9.7  | 7.9  | 9.7  | 9.1  | 10.7 | 9.1  | 6.9   | 7.3  | 9.4  | 9.2  | 8.2  |
| Inpp4a | 1.5  | 1.8  | 1.9  | 1.4  | 1.8  | 1.8  | 1.7  | 1.7   | 1.9  | 1.9  | 1.7  | 1.7  |
| Inpp4b | 0.1  | 0.0  | 0.0  | 0.9  | 1.8  | 0.0  | 0.4  | 0.1   | 0.1  | 0.2  | 0.1  | 0.1  |
| Inpp5a | 12.2 | 13.9 | 13.2 | 9.6  | 10.3 | 11.1 | 11.5 | 11.1  | 13.1 | 11.2 | 12.8 | 13.9 |
| Inpp5b | 8.6  | 9.3  | 7.8  | 9.7  | 11.3 | 8.3  | 8.7  | 9.8   | 10.1 | 8.3  | 8.8  | 8.7  |
| Inpp5d | 0.7  | 0.1  | 0.1  | 5.1  | 8.8  | 0.0  | 1.1  | 0.2   | 0.2  | 0.5  | 0.1  | 0.4  |
| Inpp5e | 8.0  | 8.6  | 8.3  | 7.3  | 8.0  | 8.7  | 8.7  | 7.7   | 8.4  | 7.7  | 7.5  | 7.9  |
| Inpp5f | 7.4  | 6.8  | 7.0  | 6.8  | 5.5  | 7.3  | 6.4  | 5.4   | 5.8  | 6.2  | 7.5  | 7.3  |
| Inpp5j | 0.0  | 0.0  | 0.0  | 0.0  | 0.0  | 0.0  | 0.0  | 0.0   | 0.0  | 0.0  | 0.0  | 0.0  |
| Inpp5k | 6.9  | 6.2  | 6.2  | 6.5  | 5.6  | 6.8  | 6.9  | 8.1   | 6.9  | 8.0  | 7.9  | 6.9  |
| Inppl1 | 23.6 | 26.6 | 22.4 | 24.7 | 26.4 | 27.8 | 24.4 | 21.3  | 26.7 | 29.8 | 24.3 | 28.1 |
| Ins2   | 0.0  | 0.0  | 0.0  | 0.2  | 0.0  | 0.0  | 0.2  | 0.0   | 0.0  | 0.2  | 0.2  | 0.0  |
| Insc   | 1.6  | 0.4  | 0.2  | 0.3  | 0.1  | 0.2  | 0.4  | 0.4   | 0.4  | 0.9  | 0.9  | 0.6  |
| Insig1 | 50.1 | 75.5 | 60.4 | 25.1 | 41.5 | 44.9 | 98.7 | 102.9 | 94.4 | 27.7 | 87.7 | 39.9 |
| Insig2 | 13.9 | 15.9 | 14.2 | 14.6 | 15.3 | 16.9 | 12.0 | 12.1  | 13.4 | 16.2 | 16.5 | 14.9 |
| Insl3  | 0.0  | 0.0  | 0.0  | 0.0  | 0.0  | 0.1  | 0.0  | 0.0   | 0.0  | 0.0  | 0.1  | 0.0  |
| Insl6  | 2.4  | 1.4  | 1.3  | 2.7  | 2.0  | 3.5  | 0.4  | 0.6   | 0.9  | 1.0  | 0.9  | 0.7  |
| Insm2  | 0.0  | 0.0  | 0.0  | 0.1  | 0.0  | 0.0  | 0.0  | 0.0   | 0.0  | 0.0  | 0.1  | 0.0  |
| Insr   | 4.1  | 4.3  | 4.3  | 3.6  | 3.6  | 4.4  | 4.0  | 3.6   | 4.3  | 4.0  | 3.8  | 4.1  |
| Insr   | 0.0  | 0.0  | 0.0  | 0.0  | 0.0  | 0.0  | 0.0  | 0.0   | 0.0  | 0.0  | 0.0  | 0.0  |
| Ints1  | 5.8  | 6.2  | 5.3  | 5.5  | 6.1  | 6.2  | 6.4  | 6.3   | 6.9  | 5.6  | 5.6  | 4.6  |
| Ints10 | 10.3 | 11.4 | 11.2 | 9.7  | 11.0 | 10.9 | 11.9 | 11.2  | 10.1 | 10.1 | 10.8 | 9.9  |
| Ints12 | 4.6  | 4.5  | 4.6  | 4.9  | 5.0  | 4.5  | 4.3  | 4.6   | 4.3  | 4.5  | 5.3  | 4.7  |
| Ints2  | 5.9  | 6.2  | 5.1  | 6.1  | 5.9  | 5.5  | 5.0  | 4.9   | 4.8  | 5.9  | 5.4  | 5.0  |
| Ints3  | 8.4  | 10.3 | 9.5  | 8.9  | 9.7  | 10.4 | 10.0 | 11.3  | 10.3 | 9.7  | 10.2 | 8.9  |
| Ints4  | 12.6 | 11.9 | 11.8 | 13.3 | 11.8 | 12.9 | 11.8 | 13.0  | 11.1 | 11.1 | 12.2 | 10.8 |
| Ints5  | 3.9  | 5.0  | 4.9  | 3.9  | 4.6  | 3.9  | 5.3  | 5.0   | 5.4  | 4.4  | 4.3  | 3.7  |
| Ints6  | 6.5  | 8.8  | 7.2  | 5.5  | 5.7  | 5.8  | 5.0  | 5.8   | 5.7  | 5.6  | 6.6  | 6.6  |
| Ints7  | 2.7  | 3.8  | 4.9  | 2.6  | 3.9  | 2.1  | 4.3  | 5.2   | 4.0  | 3.4  | 3.8  | 3.1  |
| Ints8  | 18.1 | 19.7 | 18.8 | 15.8 | 18.7 | 16.8 | 17.2 | 17.4  | 19.3 | 21.5 | 21.8 | 21.3 |
| Ints9  | 4.2  | 4.8  | 4.7  | 4.5  | 4.6  | 4.7  | 4.9  | 4.7   | 3.5  | 3.9  | 4.1  | 4.1  |
| Intu   | 1.4  | 1.4  | 1.3  | 1.1  | 1.3  | 1.6  | 1.2  | 1.2   | 1.1  | 1.2  | 1.3  | 1.2  |
| Invs   | 5.0  | 4.6  | 4.9  | 5.4  | 4.3  | 5.6  | 4.6  | 5.2   | 4.7  | 4.5  | 5.4  | 4.3  |
| Ip6k1  | 14.4 | 17.1 | 16.2 | 12.3 | 14.3 | 16.2 | 12.8 | 14.6  | 17.4 | 16.3 | 13.5 | 13.9 |
| Ip6k2  | 8.2  | 8.2  | 6.8  | 7.5  | 6.7  | 8.0  | 6.4  | 6.2   | 6.6  | 8.9  | 7.3  | 7.1  |
| Ip6k3  | 0.4  | 0.4  | 0.4  | 0.8  | 0.6  | 0.6  | 0.1  | 0.3   | 0.1  | 0.1  | 0.1  | 0.3  |
| Ipmk   | 5.0  | 6.2  | 7.6  | 4.5  | 5.7  | 4.7  | 6.1  | 6.8   | 5.6  | 5.2  | 5.4  | 6.1  |
| Ipo11  | 11.1 | 11.3 | 10.7 | 9.7  | 10.7 | 11.2 | 9.1  | 9.6   | 9.6  | 9.7  | 10.8 | 10.4 |
| Ipo13  | 12.7 | 12.6 | 10.7 | 17.2 | 16.1 | 16.7 | 14.0 | 12.6  | 12.0 | 11.6 | 10.0 | 9.9  |
| Ipo4   | 28.4 | 20.7 | 19.8 | 25.1 | 22.6 | 27.2 | 22.1 | 20.5  | 20.6 | 22.4 | 22.0 | 21.1 |
| Ipo5   | 42.9 | 30.1 | 24.7 | 40.6 | 33.6 | 38.7 | 32.7 | 29.9  | 27.9 | 32.5 | 34.8 | 31.2 |
| Ipo7   | 61.6 | 53.6 | 43.1 | 54.9 | 52.8 | 55.4 | 48.0 | 39.8  | 49.3 | 60.6 | 63.2 | 60.9 |
| Ipo8   | 12.6 | 12.0 | 10.8 | 14.6 | 11.6 | 13.6 | 10.9 | 10.4  | 10.6 | 11.6 | 11.6 | 11.4 |
| Ipo9   | 13.3 | 15.1 | 15.9 | 13.2 | 15.5 | 12.2 | 15.5 | 16.6  | 15.9 | 14.4 | 15.6 | 13.8 |
| Ipp    | 5.3  | 5.4  | 4.0  | 4.7  | 3.8  | 5.3  | 3.2  | 3.9   | 4.1  | 5.2  | 4.1  | 4.3  |
| Ippk   | 4.0  | 4.4  | 3.5  | 4.7  | 3.6  | 3.9  | 3.5  | 3.8   | 3.9  | 4.0  | 4.2  | 4.3  |
| Ipw    | 0.5  | 0.1  | 0.0  | 0.0  | 0.0  | 0.1  | 0.0  | 0.0   | 0.0  | 0.1  | 0.2  | 0.0  |
| Iqcb1  | 2.7  | 3.2  | 2.7  | 2.4  | 2.2  | 3.4  | 2.8  | 2.6   | 2.6  | 3.4  | 3.0  | 3.2  |
| Iqcc   | 6.2  | 6.1  | 7.2  | 6.9  | 6.0  | 6.6  | 7.0  | 8.3   | 7.1  | 6.6  | 6.6  | 7.7  |

Online Table 1

|          |      |      |      |       |      |      |      |      |      |      |      |      |
|----------|------|------|------|-------|------|------|------|------|------|------|------|------|
| lqcd     | 0.2  | 0.2  | 0.4  | 0.4   | 0.3  | 0.3  | 0.2  | 0.3  | 0.1  | 0.4  | 0.2  | 0.2  |
| lqce     | 2.2  | 2.5  | 2.3  | 2.5   | 2.1  | 2.5  | 2.4  | 2.0  | 1.9  | 2.0  | 2.0  | 2.2  |
| lqcg     | 2.9  | 2.9  | 2.6  | 2.6   | 2.9  | 2.7  | 2.9  | 2.7  | 2.7  | 2.5  | 2.8  | 2.8  |
| lqch     | 0.1  | 0.1  | 0.0  | 0.0   | 0.1  | 0.1  | 0.1  | 0.0  | 0.0  | 0.1  | 0.1  | 0.0  |
| lqck     | 0.9  | 0.7  | 0.4  | 1.0   | 0.5  | 0.9  | 0.6  | 0.5  | 0.3  | 0.8  | 0.7  | 0.6  |
| lqgap1   | 65.5 | 57.0 | 55.8 | 86.7  | 94.7 | 73.0 | 78.7 | 59.1 | 64.2 | 58.9 | 69.7 | 67.6 |
| lqgap2   | 0.6  | 0.4  | 0.6  | 1.5   | 1.2  | 0.2  | 0.5  | 0.3  | 0.3  | 0.6  | 0.7  | 0.7  |
| lqgap3   | 1.4  | 2.1  | 3.0  | 0.5   | 3.7  | 0.4  | 5.2  | 1.2  | 3.0  | 1.2  | 2.0  | 1.4  |
| lqsec1   | 5.9  | 6.7  | 5.6  | 6.0   | 5.2  | 5.8  | 6.7  | 5.9  | 6.3  | 5.8  | 5.6  | 5.3  |
| lqsec2   | 1.8  | 2.4  | 2.3  | 1.9   | 1.9  | 1.7  | 2.3  | 2.0  | 1.9  | 1.6  | 1.7  | 1.5  |
| lqub     | 0.1  | 0.0  | 0.0  | 0.0   | 0.0  | 0.0  | 0.0  | 0.0  | 0.0  | 0.0  | 0.0  | 0.0  |
| lrak1    | 21.5 | 21.5 | 19.1 | 23.4  | 19.1 | 24.3 | 21.4 | 18.3 | 18.2 | 16.7 | 18.2 | 18.3 |
| lrak1bp1 | 6.8  | 5.6  | 5.6  | 8.9   | 4.5  | 7.2  | 5.9  | 4.3  | 4.4  | 4.8  | 6.0  | 6.2  |
| lrak2    | 5.3  | 4.0  | 3.3  | 7.0   | 6.7  | 4.4  | 6.0  | 3.4  | 5.3  | 5.7  | 5.9  | 5.7  |
| lrak3    | 5.4  | 7.1  | 9.6  | 5.5   | 7.9  | 3.8  | 8.2  | 10.9 | 7.7  | 4.2  | 6.6  | 7.7  |
| lrak4    | 4.3  | 4.2  | 5.3  | 5.3   | 5.4  | 4.2  | 4.6  | 5.0  | 4.4  | 3.9  | 5.0  | 4.2  |
| lreb2    | 3.5  | 5.2  | 4.7  | 2.7   | 4.5  | 3.5  | 4.0  | 4.2  | 4.3  | 4.9  | 4.6  | 4.5  |
| lrf1     | 9.7  | 9.1  | 11.1 | 11.7  | 18.4 | 12.2 | 11.9 | 11.2 | 10.6 | 11.5 | 9.7  | 12.3 |
| lrf2     | 2.2  | 3.3  | 4.0  | 3.1   | 3.6  | 2.8  | 3.4  | 2.8  | 2.6  | 2.8  | 2.2  | 2.7  |
| lrf2bp1  | 3.8  | 4.4  | 3.9  | 4.1   | 4.0  | 4.6  | 5.0  | 4.7  | 4.9  | 4.6  | 4.0  | 4.2  |
| lrf2bp2  | 13.0 | 14.7 | 16.8 | 12.6  | 16.4 | 14.9 | 13.3 | 13.2 | 14.7 | 16.9 | 12.9 | 13.0 |
| lrf2bpl  | 7.9  | 9.0  | 6.8  | 7.3   | 7.9  | 7.1  | 6.9  | 8.0  | 8.7  | 10.3 | 6.7  | 6.7  |
| lrf3     | 16.4 | 15.4 | 13.8 | 15.8  | 14.7 | 16.6 | 17.3 | 14.6 | 17.1 | 18.4 | 16.8 | 15.9 |
| lrf4     | 0.0  | 0.0  | 0.0  | 0.0   | 0.0  | 0.0  | 0.0  | 0.0  | 0.0  | 0.0  | 0.0  | 0.0  |
| lrf5     | 3.5  | 2.8  | 2.8  | 7.9   | 14.1 | 2.6  | 3.7  | 1.2  | 2.4  | 4.3  | 2.3  | 3.2  |
| lrf6     | 0.3  | 0.3  | 0.3  | 0.2   | 0.3  | 0.3  | 0.3  | 0.3  | 0.2  | 0.1  | 0.2  | 0.3  |
| lrf7     | 14.5 | 8.1  | 10.0 | 27.6  | 8.5  | 12.5 | 4.9  | 3.0  | 4.2  | 3.3  | 3.6  | 8.4  |
| lrf8     | 0.9  | 0.2  | 0.3  | 4.8   | 7.1  | 0.2  | 0.8  | 0.2  | 0.2  | 0.3  | 0.1  | 0.3  |
| lrf9     | 12.8 | 9.2  | 12.3 | 13.9  | 10.7 | 10.1 | 9.3  | 8.7  | 9.6  | 7.6  | 7.7  | 15.7 |
| lrg1     | 0.5  | 0.1  | 0.1  | 0.9   | 8.5  | 0.1  | 1.7  | 0.1  | 0.3  | 0.4  | 0.1  | 0.3  |
| lrgm1    | 44.4 | 26.4 | 21.5 | 55.4  | 32.8 | 38.9 | 27.8 | 16.2 | 26.0 | 29.5 | 26.7 | 41.7 |
| lrgm2    | 9.3  | 5.7  | 9.1  | 11.9  | 8.1  | 5.9  | 6.1  | 5.3  | 6.6  | 4.9  | 6.2  | 12.0 |
| lrgq     | 6.7  | 5.7  | 4.5  | 6.2   | 5.8  | 5.8  | 5.8  | 4.7  | 5.5  | 6.2  | 5.5  | 5.2  |
| lrs1     | 6.5  | 8.2  | 7.8  | 6.9   | 8.1  | 6.0  | 8.4  | 9.2  | 8.9  | 8.9  | 9.1  | 6.9  |
| lrs2     | 1.6  | 1.8  | 1.9  | 1.3   | 2.5  | 2.0  | 2.6  | 2.0  | 2.6  | 3.2  | 1.6  | 2.2  |
| lrs3     | 0.2  | 0.6  | 0.5  | 0.7   | 0.4  | 0.5  | 0.2  | 0.2  | 0.3  | 0.4  | 0.4  | 0.3  |
| lrs4     | 0.0  | 0.0  | 0.0  | 0.0   | 0.0  | 0.0  | 0.0  | 0.0  | 0.0  | 0.0  | 0.0  | 0.0  |
| lrx1     | 0.3  | 0.2  | 0.2  | 0.4   | 0.0  | 0.2  | 0.1  | 0.1  | 0.2  | 1.0  | 1.0  | 0.6  |
| lrx2     | 0.5  | 0.2  | 0.2  | 1.1   | 0.3  | 0.6  | 0.8  | 0.2  | 0.3  | 0.8  | 0.7  | 0.4  |
| lrx3     | 0.6  | 0.8  | 1.0  | 0.5   | 0.7  | 0.8  | 0.7  | 0.7  | 0.6  | 0.4  | 0.6  | 0.5  |
| lrx5     | 1.2  | 0.9  | 0.4  | 1.6   | 0.8  | 1.3  | 0.7  | 0.2  | 0.5  | 0.5  | 0.4  | 0.4  |
| lsca1    | 31.5 | 28.6 | 28.0 | 27.0  | 27.5 | 27.9 | 27.4 | 30.0 | 31.1 | 36.9 | 34.6 | 33.1 |
| lsca2    | 22.0 | 24.2 | 22.1 | 21.5  | 17.8 | 23.5 | 20.5 | 21.9 | 23.5 | 20.7 | 23.4 | 20.0 |
| lscu     | 87.6 | 63.2 | 56.8 | 100.2 | 64.2 | 88.6 | 64.6 | 64.8 | 59.8 | 69.5 | 76.5 | 74.4 |
| lsg15    | 19.0 | 7.7  | 15.7 | 29.6  | 14.7 | 16.1 | 10.7 | 6.8  | 10.3 | 7.2  | 10.9 | 27.2 |
| lsg20    | 10.7 | 11.4 | 11.3 | 14.9  | 8.2  | 11.7 | 12.3 | 13.6 | 12.4 | 8.0  | 14.2 | 11.9 |
| lsg20l2  | 7.5  | 7.7  | 8.3  | 6.6   | 7.5  | 6.9  | 7.5  | 9.2  | 8.4  | 7.7  | 7.3  | 7.4  |
| lsl1     | 0.0  | 0.0  | 0.0  | 0.0   | 0.0  | 0.0  | 0.0  | 0.0  | 0.1  | 0.4  | 0.1  | 0.0  |
| lsl2     | 0.1  | 0.0  | 0.0  | 0.1   | 0.0  | 0.0  | 0.1  | 0.0  | 0.1  | 0.0  | 0.1  | 0.0  |
| lslr     | 11.3 | 16.2 | 28.3 | 12.2  | 16.0 | 14.5 | 13.2 | 18.4 | 15.2 | 13.2 | 10.9 | 13.2 |
| lslr2    | 0.0  | 0.0  | 0.0  | 0.0   | 0.0  | 0.0  | 0.0  | 0.0  | 0.0  | 0.0  | 0.0  | 0.0  |
| lsm1     | 1.1  | 2.5  | 8.3  | 0.3   | 1.4  | 0.4  | 2.3  | 9.4  | 7.4  | 2.5  | 1.9  | 7.9  |
| lsoc1    | 5.0  | 5.1  | 4.6  | 6.3   | 5.8  | 4.7  | 4.0  | 4.3  | 4.2  | 7.0  | 6.6  | 5.0  |
| lsoc2a   | 9.9  | 9.6  | 8.5  | 8.0   | 10.1 | 10.5 | 9.1  | 9.2  | 10.2 | 9.5  | 8.3  | 9.4  |
| lsoc2b   | 10.8 | 9.9  | 10.2 | 10.1  | 8.0  | 10.6 | 8.3  | 10.2 | 8.2  | 10.6 | 8.9  | 11.0 |
| lspd     | 1.8  | 1.8  | 2.0  | 1.2   | 1.8  | 1.8  | 1.6  | 2.0  | 2.0  | 2.3  | 2.2  | 1.8  |
| lst1     | 17.1 | 19.4 | 17.6 | 15.8  | 16.9 | 15.5 | 19.5 | 18.4 | 19.2 | 19.9 | 18.3 | 19.4 |

Online Table 1



|          |       |       |       |       |       |       |       |       |       |       |       |       |
|----------|-------|-------|-------|-------|-------|-------|-------|-------|-------|-------|-------|-------|
| lsy1     | 13.0  | 11.1  | 15.0  | 13.7  | 13.4  | 13.2  | 13.9  | 13.6  | 12.4  | 14.0  | 13.5  | 17.7  |
| lsyna1   | 4.2   | 5.1   | 6.4   | 4.6   | 7.2   | 3.0   | 2.6   | 5.6   | 3.9   | 15.9  | 6.9   | 6.5   |
| ltch     | 16.7  | 17.7  | 17.1  | 17.4  | 16.6  | 17.6  | 15.9  | 16.9  | 16.9  | 18.2  | 19.4  | 19.1  |
| ltfg1    | 67.2  | 65.2  | 58.8  | 68.4  | 63.9  | 78.7  | 60.5  | 59.4  | 60.8  | 61.0  | 64.5  | 66.6  |
| ltfg2    | 2.5   | 2.1   | 1.9   | 2.9   | 2.5   | 2.8   | 2.8   | 2.7   | 2.4   | 3.3   | 2.5   | 3.1   |
| ltfg3    | 20.8  | 20.6  | 17.4  | 19.3  | 18.5  | 20.3  | 19.2  | 19.9  | 19.2  | 20.7  | 17.8  | 15.4  |
| ltga1    | 7.5   | 9.5   | 15.5  | 4.4   | 10.3  | 3.1   | 11.2  | 15.2  | 17.6  | 15.5  | 16.1  | 15.3  |
| ltga10   | 0.6   | 0.7   | 0.5   | 0.4   | 0.5   | 0.6   | 0.7   | 0.3   | 0.7   | 0.7   | 0.6   | 0.5   |
| ltga11   | 8.7   | 17.6  | 27.7  | 9.4   | 18.7  | 14.0  | 27.2  | 27.0  | 36.2  | 35.8  | 40.9  | 39.0  |
| ltga2    | 0.8   | 0.7   | 1.0   | 0.4   | 0.9   | 0.3   | 1.2   | 0.7   | 0.6   | 0.3   | 0.5   | 0.5   |
| ltga2b   | 0.3   | 0.5   | 0.5   | 0.4   | 0.4   | 0.4   | 0.4   | 0.4   | 0.3   | 0.3   | 0.3   | 0.3   |
| ltga3    | 3.1   | 1.3   | 1.4   | 1.5   | 1.0   | 1.8   | 1.3   | 1.9   | 2.2   | 9.6   | 4.0   | 3.1   |
| ltga4    | 2.0   | 1.8   | 2.0   | 1.7   | 1.8   | 1.8   | 1.7   | 3.9   | 1.6   | 1.6   | 2.1   | 2.4   |
| ltga5    | 8.7   | 8.5   | 7.5   | 8.8   | 15.5  | 9.1   | 12.3  | 10.2  | 10.2  | 10.5  | 10.3  | 8.3   |
| ltga6    | 4.4   | 1.8   | 1.6   | 4.5   | 5.5   | 3.6   | 1.7   | 1.2   | 1.3   | 2.4   | 2.2   | 1.4   |
| ltga7    | 4.2   | 2.3   | 1.8   | 1.9   | 1.3   | 1.6   | 1.3   | 1.2   | 1.4   | 1.8   | 1.6   | 1.8   |
| ltga8    | 0.5   | 0.4   | 0.7   | 0.5   | 0.6   | 0.5   | 0.2   | 0.5   | 0.4   | 0.4   | 0.4   | 0.3   |
| ltga9    | 7.8   | 7.7   | 8.5   | 7.8   | 9.4   | 6.9   | 8.7   | 7.3   | 9.2   | 8.3   | 7.4   | 10.3  |
| ltgad    | 0.0   | 0.0   | 0.0   | 0.3   | 0.7   | 0.0   | 0.1   | 0.0   | 0.0   | 0.0   | 0.0   | 0.0   |
| ltgae    | 0.0   | 0.0   | 0.0   | 0.0   | 0.1   | 0.0   | 0.0   | 0.0   | 0.0   | 0.0   | 0.0   | 0.0   |
| ltgal    | 0.2   | 0.1   | 0.0   | 1.0   | 4.1   | 0.1   | 0.8   | 0.1   | 0.2   | 0.3   | 0.1   | 0.2   |
| ltgam    | 2.3   | 0.0   | 0.2   | 13.7  | 33.1  | 0.0   | 3.1   | 0.5   | 0.5   | 1.6   | 0.6   | 1.3   |
| ltgav    | 46.0  | 47.0  | 48.5  | 37.4  | 52.8  | 45.0  | 49.1  | 40.4  | 38.6  | 43.7  | 42.8  | 39.3  |
| ltgax    | 0.7   | 0.0   | 0.0   | 7.1   | 14.2  | 0.0   | 1.0   | 0.1   | 0.1   | 0.4   | 0.1   | 0.3   |
| ltgb1    | 372.2 | 342.9 | 323.3 | 363.8 | 359.8 | 359.2 | 418.9 | 368.5 | 437.3 | 359.8 | 439.2 | 448.3 |
| ltgb1bp1 | 17.9  | 15.0  | 13.8  | 18.4  | 14.2  | 18.5  | 13.5  | 13.1  | 13.2  | 15.4  | 16.2  | 16.4  |
| ltgb1bp2 | 0.1   | 0.0   | 0.1   | 0.1   | 0.0   | 0.0   | 0.2   | 0.0   | 0.1   | 0.2   | 0.0   | 0.0   |
| ltgb2    | 4.1   | 0.3   | 0.4   | 32.1  | 61.1  | 0.1   | 5.4   | 0.8   | 0.7   | 3.5   | 1.0   | 2.2   |
| ltgb3    | 1.0   | 0.8   | 1.0   | 0.9   | 0.8   | 0.9   | 1.0   | 2.0   | 1.7   | 1.5   | 1.7   | 1.6   |
| ltgb3bp  | 1.2   | 1.0   | 1.3   | 1.0   | 0.9   | 1.3   | 0.8   | 1.7   | 0.7   | 1.0   | 1.3   | 1.3   |
| ltgb4    | 0.2   | 0.2   | 0.2   | 0.2   | 0.2   | 0.3   | 0.2   | 0.2   | 0.2   | 0.4   | 0.2   | 0.2   |
| ltgb5    | 259.8 | 298.4 | 289.9 | 289.3 | 298.5 | 383.1 | 373.8 | 275.9 | 391.4 | 295.3 | 264.0 | 391.9 |
| ltgb6    | 0.2   | 0.1   | 0.1   | 0.0   | 0.1   | 0.1   | 0.1   | 0.1   | 0.1   | 0.1   | 0.1   | 0.1   |
| ltgb7    | 0.0   | 0.0   | 0.0   | 0.1   | 0.4   | 0.0   | 0.1   | 0.0   | 0.0   | 0.1   | 0.0   | 0.0   |
| ltgb8    | 1.7   | 3.6   | 5.3   | 1.3   | 3.6   | 1.9   | 3.6   | 6.0   | 6.9   | 3.3   | 3.0   | 5.6   |
| ltgb11   | 61.5  | 19.4  | 20.1  | 39.5  | 15.3  | 48.4  | 13.7  | 33.7  | 19.4  | 14.2  | 22.9  | 29.6  |
| ltih1    | 0.0   | 0.1   | 0.0   | 0.1   | 0.0   | 0.0   | 0.0   | 0.1   | 0.0   | 0.0   | 0.0   | 0.0   |
| ltih2    | 1.9   | 1.3   | 1.3   | 0.4   | 0.8   | 1.0   | 0.5   | 1.0   | 0.4   | 0.6   | 0.7   | 1.0   |
| ltih3    | 0.0   | 0.1   | 0.2   | 0.0   | 0.0   | 0.0   | 0.0   | 0.2   | 0.0   | 0.0   | 0.0   | 0.1   |
| ltih4    | 0.1   | 0.0   | 0.1   | 0.0   | 0.1   | 0.0   | 0.1   | 0.0   | 0.0   | 0.1   | 0.0   | 0.0   |
| ltih5    | 0.1   | 0.1   | 0.2   | 0.1   | 0.1   | 0.0   | 0.0   | 0.1   | 0.0   | 0.0   | 0.1   | 0.0   |
| ltm2a    | 2.9   | 2.6   | 4.9   | 0.6   | 1.2   | 1.2   | 1.1   | 3.8   | 2.5   | 3.6   | 2.8   | 3.2   |
| ltm2b    | 463.3 | 408.6 | 481.2 | 602.3 | 592.4 | 493.0 | 396.0 | 376.3 | 372.4 | 444.4 | 364.6 | 495.6 |
| ltm2c    | 153.9 | 126.1 | 116.7 | 191.4 | 142.4 | 173.3 | 121.8 | 110.0 | 111.9 | 144.6 | 108.8 | 123.7 |
| ltpa     | 18.0  | 16.2  | 16.0  | 17.6  | 18.1  | 15.6  | 13.1  | 16.3  | 18.1  | 17.6  | 15.7  | 13.2  |
| ltpk1    | 4.7   | 6.0   | 4.2   | 5.0   | 3.7   | 4.3   | 5.7   | 6.1   | 5.5   | 4.3   | 5.1   | 4.2   |
| ltпка    | 0.0   | 0.1   | 0.1   | 0.1   | 0.1   | 0.2   | 0.0   | 0.0   | 0.0   | 0.0   | 0.0   | 0.0   |
| ltpkb    | 4.1   | 4.2   | 5.1   | 5.0   | 6.2   | 4.2   | 4.4   | 4.9   | 4.3   | 3.9   | 3.8   | 4.4   |
| ltpkc    | 3.6   | 4.2   | 4.2   | 3.1   | 4.1   | 4.1   | 4.4   | 4.5   | 4.3   | 4.3   | 3.7   | 4.3   |
| ltpr1    | 15.1  | 15.7  | 16.3  | 17.7  | 16.8  | 18.1  | 17.1  | 13.0  | 15.8  | 16.6  | 16.2  | 14.9  |
| ltpr2    | 8.3   | 7.3   | 7.6   | 9.5   | 7.7   | 9.8   | 7.3   | 6.5   | 6.1   | 4.9   | 5.8   | 6.8   |
| ltpr3    | 2.3   | 1.7   | 1.8   | 1.7   | 2.6   | 2.0   | 1.7   | 2.3   | 1.8   | 1.9   | 2.0   | 1.4   |
| ltpr1p   | 7.7   | 7.0   | 4.7   | 7.4   | 10.8  | 7.0   | 12.1  | 4.7   | 8.3   | 7.4   | 7.7   | 6.0   |
| ltpr1p1  | 2.8   | 3.0   | 3.1   | 3.0   | 3.6   | 2.6   | 3.1   | 2.5   | 2.5   | 2.0   | 2.1   | 2.0   |
| ltpr1p2  | 75.8  | 62.9  | 54.8  | 89.8  | 83.6  | 92.5  | 64.2  | 48.4  | 56.1  | 55.0  | 52.5  | 57.1  |
| ltsn1    | 36.9  | 52.5  | 65.4  | 49.7  | 45.5  | 40.5  | 63.9  | 70.3  | 62.3  | 32.0  | 43.2  | 51.0  |
| ltsn2    | 18.2  | 18.6  | 16.9  | 20.2  | 20.5  | 16.0  | 20.4  | 16.6  | 16.6  | 16.9  | 21.1  | 22.1  |

Online Table 1

|          |      |      |      |      |      |      |      |      |      |      |      |      |
|----------|------|------|------|------|------|------|------|------|------|------|------|------|
| Ivd      | 13.6 | 16.2 | 18.4 | 11.1 | 11.0 | 12.1 | 10.6 | 14.7 | 13.5 | 13.3 | 14.1 | 12.5 |
| Ivl      | 2.3  | 0.4  | 0.2  | 0.8  | 0.5  | 0.2  | 0.6  | 0.1  | 0.2  | 7.5  | 2.5  | 1.6  |
| Ivns1abp | 18.4 | 17.0 | 16.4 | 23.9 | 20.8 | 20.9 | 22.5 | 17.2 | 21.5 | 21.7 | 24.9 | 17.6 |
| Iws1     | 4.2  | 4.0  | 4.1  | 4.5  | 4.0  | 3.9  | 4.8  | 4.2  | 3.9  | 3.9  | 4.8  | 4.6  |
| Izumo4   | 9.2  | 10.4 | 11.4 | 7.9  | 8.8  | 9.5  | 9.7  | 8.5  | 13.5 | 7.3  | 9.1  | 11.2 |
| Jag1     | 37.7 | 43.6 | 42.7 | 36.5 | 42.3 | 32.5 | 43.8 | 42.6 | 57.1 | 26.8 | 38.8 | 34.2 |
| Jag2     | 0.1  | 0.1  | 0.1  | 0.1  | 0.2  | 0.0  | 0.0  | 0.0  | 0.1  | 0.1  | 0.0  | 0.0  |
| Jagn1    | 23.3 | 20.5 | 16.5 | 23.8 | 19.4 | 20.2 | 19.9 | 21.3 | 19.8 | 22.3 | 21.8 | 20.5 |
| Jak1     | 53.4 | 55.1 | 57.5 | 54.7 | 63.0 | 54.2 | 65.2 | 60.3 | 58.0 | 56.8 | 60.5 | 70.2 |
| Jak2     | 22.4 | 31.0 | 31.6 | 22.9 | 32.2 | 22.4 | 30.7 | 25.0 | 27.0 | 31.0 | 31.1 | 32.2 |
| Jak3     | 0.8  | 1.4  | 1.3  | 0.9  | 1.3  | 0.8  | 1.5  | 0.7  | 1.3  | 1.0  | 0.8  | 0.8  |
| Jakmip2  | 0.0  | 0.0  | 0.0  | 0.0  | 0.0  | 0.0  | 0.1  | 0.1  | 0.0  | 0.0  | 0.0  | 0.0  |
| Jakmip3  | 0.5  | 0.5  | 0.4  | 0.6  | 0.4  | 0.9  | 0.3  | 0.3  | 0.2  | 0.2  | 0.2  | 0.4  |
| Jam2     | 25.3 | 23.4 | 21.8 | 18.0 | 21.0 | 16.2 | 19.4 | 19.0 | 13.5 | 22.3 | 22.7 | 23.0 |
| Jam3     | 35.8 | 30.7 | 26.4 | 34.5 | 26.7 | 36.8 | 26.3 | 27.8 | 28.9 | 30.9 | 31.3 | 28.6 |
| Jarid2   | 1.1  | 1.4  | 1.5  | 0.9  | 1.6  | 1.0  | 1.3  | 1.5  | 1.3  | 1.6  | 1.7  | 1.4  |
| Jazf1    | 2.1  | 2.2  | 2.7  | 2.4  | 1.9  | 2.5  | 1.7  | 1.9  | 1.6  | 2.5  | 1.8  | 1.9  |
| Jdp2     | 36.0 | 30.5 | 31.7 | 44.6 | 28.4 | 38.2 | 38.1 | 38.6 | 36.4 | 31.4 | 40.3 | 34.4 |
| Jhdm1d   | 2.3  | 2.5  | 2.7  | 2.3  | 3.1  | 1.9  | 1.6  | 1.8  | 1.8  | 2.3  | 1.8  | 2.4  |
| Jkamp    | 20.2 | 18.9 | 17.9 | 21.0 | 19.2 | 20.6 | 18.8 | 19.2 | 20.1 | 22.7 | 21.7 | 20.4 |
| Jmjd1c   | 7.2  | 7.8  | 7.4  | 8.1  | 8.5  | 7.9  | 7.4  | 6.7  | 6.0  | 6.8  | 6.6  | 7.5  |
| Jmjd4    | 2.1  | 2.2  | 2.5  | 1.7  | 2.6  | 2.3  | 2.2  | 2.1  | 2.9  | 2.7  | 2.5  | 2.2  |
| Jmjd6    | 17.7 | 15.7 | 15.4 | 15.3 | 17.1 | 14.2 | 19.9 | 15.7 | 18.1 | 18.0 | 19.0 | 17.7 |
| Jmjd7    | 2.1  | 1.7  | 1.5  | 1.6  | 1.3  | 1.7  | 2.0  | 2.7  | 1.1  | 1.6  | 1.4  | 1.3  |
| Jmjd8    | 8.0  | 8.5  | 10.4 | 10.0 | 8.8  | 10.2 | 8.9  | 11.6 | 9.1  | 10.0 | 8.1  | 10.3 |
| Jmy      | 4.2  | 4.4  | 4.3  | 4.5  | 3.8  | 4.6  | 3.9  | 3.9  | 4.0  | 5.2  | 4.8  | 4.9  |
| Josd1    | 13.1 | 12.9 | 11.3 | 12.4 | 11.8 | 13.1 | 10.6 | 11.8 | 11.9 | 13.0 | 10.8 | 11.2 |
| Josd2    | 25.1 | 23.2 | 17.2 | 25.2 | 25.8 | 25.1 | 20.7 | 21.2 | 25.7 | 21.6 | 22.3 | 17.7 |
| Jph1     | 0.2  | 0.1  | 0.1  | 0.2  | 0.1  | 0.2  | 0.2  | 0.1  | 0.2  | 0.5  | 0.5  | 0.2  |
| Jph2     | 33.9 | 37.5 | 35.7 | 34.4 | 32.6 | 36.4 | 50.2 | 35.5 | 51.3 | 29.5 | 35.4 | 38.6 |
| Jph3     | 0.2  | 0.1  | 0.1  | 0.3  | 0.2  | 0.2  | 0.2  | 0.1  | 0.1  | 0.1  | 0.2  | 0.1  |
| Jph4     | 0.1  | 0.2  | 0.1  | 0.1  | 0.1  | 0.1  | 0.1  | 0.1  | 0.1  | 0.3  | 0.2  | 0.2  |
| Jpx      | 0.0  | 0.0  | 0.1  | 0.0  | 0.0  | 0.0  | 0.1  | 0.1  | 0.0  | 0.1  | 0.0  | 0.1  |
| Jrk      | 1.6  | 1.4  | 1.5  | 1.1  | 1.2  | 1.7  | 1.4  | 1.4  | 1.4  | 1.2  | 1.2  | 1.5  |
| Jrkl     | 4.7  | 4.7  | 5.0  | 4.1  | 3.9  | 4.3  | 3.7  | 4.6  | 5.7  | 4.9  | 6.2  | 6.3  |
| Jsrp1    | 0.2  | 0.2  | 0.1  | 0.0  | 0.1  | 0.2  | 0.0  | 0.0  | 0.0  | 0.1  | 0.0  | 0.2  |
| Jtb      | 28.7 | 25.1 | 22.2 | 26.3 | 27.1 | 23.1 | 24.7 | 26.2 | 26.3 | 27.9 | 25.1 | 28.3 |
| Jun      | 9.1  | 5.7  | 4.1  | 9.8  | 10.8 | 5.1  | 7.1  | 4.9  | 5.2  | 14.7 | 7.6  | 6.0  |
| Junb     | 34.8 | 40.7 | 44.6 | 34.6 | 57.1 | 26.5 | 48.4 | 42.4 | 52.8 | 77.6 | 38.6 | 47.6 |
| Jund     | 23.7 | 14.6 | 10.6 | 19.0 | 15.6 | 19.8 | 15.5 | 17.5 | 15.6 | 17.3 | 13.3 | 13.6 |
| Jup      | 13.0 | 12.1 | 6.8  | 13.3 | 12.0 | 12.4 | 14.7 | 11.8 | 14.4 | 13.5 | 17.9 | 9.4  |
| Kalrn    | 3.5  | 4.3  | 5.6  | 3.2  | 5.3  | 2.4  | 5.3  | 4.7  | 6.2  | 8.0  | 6.7  | 8.3  |
| Kank1    | 12.8 | 11.1 | 12.0 | 10.9 | 7.3  | 10.7 | 4.8  | 5.4  | 5.0  | 20.6 | 11.1 | 10.8 |
| Kank2    | 52.7 | 53.2 | 44.9 | 55.5 | 42.1 | 53.4 | 56.6 | 53.7 | 50.1 | 43.9 | 51.6 | 48.0 |
| Kank3    | 2.2  | 1.7  | 1.7  | 1.2  | 1.7  | 2.0  | 1.2  | 0.8  | 1.4  | 2.0  | 1.3  | 1.5  |
| Kank4    | 0.1  | 0.0  | 0.0  | 0.2  | 0.0  | 0.0  | 0.1  | 0.1  | 0.1  | 0.3  | 0.1  | 0.1  |
| Kansl1   | 8.5  | 9.3  | 9.2  | 8.9  | 8.9  | 9.0  | 8.4  | 8.7  | 8.9  | 8.3  | 8.6  | 8.2  |
| Kansl1l  | 3.7  | 4.7  | 5.4  | 3.7  | 4.6  | 4.1  | 4.0  | 5.2  | 4.4  | 5.3  | 5.3  | 5.5  |
| Kansl2   | 36.6 | 38.2 | 29.4 | 37.4 | 31.4 | 30.9 | 33.3 | 31.8 | 32.7 | 33.9 | 33.6 | 31.0 |
| Kansl3   | 10.1 | 9.6  | 8.8  | 10.5 | 9.1  | 10.4 | 10.8 | 7.6  | 9.6  | 6.8  | 8.5  | 8.1  |
| Kars     | 47.3 | 41.5 | 38.1 | 53.8 | 41.9 | 48.8 | 40.7 | 43.5 | 34.1 | 37.8 | 43.5 | 39.9 |
| Kat2a    | 5.3  | 5.5  | 5.8  | 5.1  | 5.7  | 5.2  | 5.0  | 6.2  | 4.7  | 5.3  | 5.3  | 3.9  |
| Kat2b    | 19.7 | 24.3 | 26.2 | 16.3 | 15.7 | 15.7 | 14.8 | 21.2 | 22.0 | 17.7 | 20.7 | 23.0 |
| Kat5     | 9.5  | 9.8  | 10.0 | 11.3 | 9.2  | 10.5 | 12.2 | 11.5 | 10.3 | 10.1 | 10.2 | 10.3 |
| Kat6a    | 2.9  | 3.9  | 4.8  | 3.4  | 4.0  | 3.2  | 4.3  | 4.4  | 3.8  | 4.0  | 4.5  | 4.2  |
| Kat6b    | 3.1  | 3.8  | 4.2  | 3.2  | 3.0  | 3.4  | 3.8  | 4.9  | 3.7  | 4.2  | 4.4  | 4.5  |
| Kat7     | 7.4  | 8.8  | 8.2  | 7.4  | 7.5  | 7.8  | 8.6  | 8.5  | 7.7  | 7.3  | 7.6  | 7.8  |

Online Table 1

|         |      |       |       |      |      |       |      |       |       |      |      |       |
|---------|------|-------|-------|------|------|-------|------|-------|-------|------|------|-------|
| Kat8    | 11.9 | 12.3  | 12.5  | 11.0 | 10.5 | 11.4  | 9.4  | 11.6  | 11.0  | 10.7 | 11.8 | 9.5   |
| Katna1  | 18.7 | 17.7  | 15.9  | 16.1 | 14.9 | 15.5  | 14.0 | 14.8  | 13.7  | 16.7 | 15.8 | 15.6  |
| Katna1  | 7.4  | 7.0   | 7.2   | 9.2  | 5.5  | 7.9   | 6.1  | 4.7   | 5.6   | 5.2  | 6.3  | 6.7   |
| Katna2  | 0.3  | 0.6   | 0.7   | 0.5  | 0.5  | 0.6   | 0.6  | 0.3   | 0.4   | 0.4  | 0.6  | 0.5   |
| Katnb1  | 3.7  | 4.1   | 4.0   | 3.7  | 3.8  | 4.4   | 3.6  | 3.4   | 3.5   | 3.7  | 4.0  | 3.3   |
| Katnb1  | 6.0  | 7.7   | 6.6   | 6.9  | 6.6  | 7.0   | 6.8  | 6.0   | 7.5   | 6.5  | 8.8  | 6.8   |
| Kazald1 | 2.6  | 2.5   | 2.6   | 2.6  | 1.5  | 6.8   | 3.5  | 2.6   | 3.5   | 4.0  | 3.9  | 3.7   |
| Kazn    | 3.1  | 3.7   | 4.1   | 2.5  | 3.7  | 2.8   | 4.0  | 5.7   | 4.2   | 5.2  | 6.1  | 3.4   |
| Kbtbd11 | 0.0  | 0.0   | 0.1   | 0.0  | 0.0  | 0.0   | 0.0  | 0.1   | 0.0   | 0.1  | 0.0  | 0.1   |
| Kbtbd2  | 8.8  | 9.0   | 8.6   | 8.4  | 9.0  | 8.1   | 9.2  | 8.1   | 10.1  | 10.3 | 9.5  | 9.6   |
| Kbtbd3  | 0.7  | 0.7   | 0.8   | 1.3  | 0.7  | 1.1   | 0.6  | 0.7   | 1.1   | 0.9  | 1.2  | 1.1   |
| Kbtbd4  | 6.4  | 7.4   | 6.2   | 5.7  | 7.2  | 6.5   | 6.1  | 6.3   | 6.9   | 7.1  | 6.9  | 6.4   |
| Kbtbd7  | 1.2  | 1.6   | 2.1   | 1.5  | 1.3  | 1.4   | 1.4  | 1.8   | 1.9   | 1.8  | 1.5  | 1.9   |
| Kbtbd8  | 0.3  | 0.4   | 0.3   | 0.3  | 0.5  | 0.2   | 0.2  | 0.3   | 0.3   | 0.5  | 0.3  | 0.4   |
| Kcmf1   | 23.4 | 21.1  | 19.4  | 24.5 | 18.4 | 26.1  | 20.0 | 17.8  | 19.1  | 19.5 | 21.6 | 20.0  |
| Kcna1   | 0.0  | 0.0   | 0.0   | 0.0  | 0.0  | 0.0   | 0.0  | 0.0   | 0.0   | 0.0  | 0.0  | 0.0   |
| Kcna2   | 0.0  | 0.0   | 0.0   | 0.0  | 0.0  | 0.0   | 0.0  | 0.0   | 0.0   | 0.0  | 0.0  | 0.0   |
| Kcna3   | 0.0  | 0.0   | 0.0   | 0.2  | 0.3  | 0.0   | 0.1  | 0.0   | 0.0   | 0.1  | 0.0  | 0.0   |
| Kcna4   | 0.0  | 0.0   | 0.0   | 0.0  | 0.0  | 0.0   | 0.0  | 0.0   | 0.0   | 0.0  | 0.0  | 0.0   |
| Kcna5   | 0.0  | 0.0   | 0.1   | 0.0  | 0.0  | 0.0   | 0.0  | 0.1   | 0.1   | 0.0  | 0.0  | 0.0   |
| Kcna6   | 0.0  | 0.0   | 0.0   | 0.0  | 0.0  | 0.0   | 0.0  | 0.0   | 0.0   | 0.0  | 0.0  | 0.0   |
| Kcnab1  | 24.1 | 30.6  | 25.8  | 31.1 | 20.0 | 42.3  | 26.0 | 14.6  | 27.9  | 23.8 | 21.7 | 16.6  |
| Kcnab2  | 1.3  | 0.7   | 0.8   | 4.5  | 6.3  | 0.8   | 1.1  | 0.6   | 0.5   | 0.7  | 0.5  | 0.7   |
| Kcnab3  | 0.0  | 0.0   | 0.1   | 0.1  | 0.1  | 0.0   | 0.1  | 0.1   | 0.1   | 0.1  | 0.1  | 0.1   |
| Kcnb1   | 0.6  | 1.2   | 1.3   | 0.6  | 0.6  | 0.9   | 0.9  | 1.4   | 0.9   | 0.8  | 0.6  | 0.9   |
| Kcnc2   | 0.0  | 0.0   | 0.0   | 0.0  | 0.0  | 0.0   | 0.0  | 0.0   | 0.0   | 0.0  | 0.0  | 0.0   |
| Kcnc3   | 0.0  | 0.0   | 0.0   | 0.0  | 0.0  | 0.0   | 0.0  | 0.0   | 0.0   | 0.0  | 0.0  | 0.0   |
| Kcnd1   | 0.4  | 1.5   | 1.1   | 0.1  | 0.7  | 0.7   | 1.0  | 1.2   | 0.8   | 0.6  | 0.6  | 0.5   |
| Kcnd2   | 0.0  | 0.0   | 0.0   | 0.0  | 0.0  | 0.0   | 0.0  | 0.0   | 0.0   | 0.0  | 0.0  | 0.0   |
| Kcnd3   | 0.1  | 0.0   | 0.1   | 0.0  | 0.0  | 0.2   | 0.0  | 0.1   | 0.0   | 0.1  | 0.1  | 0.0   |
| Kcne1   | 0.0  | 0.0   | 0.0   | 0.0  | 0.0  | 0.0   | 0.0  | 0.0   | 0.0   | 0.0  | 0.0  | 0.0   |
| Kcne1l  | 0.2  | 0.3   | 0.4   | 0.0  | 0.5  | 0.2   | 0.1  | 0.3   | 0.2   | 0.0  | 0.1  | 0.2   |
| Kcne2   | 0.1  | 0.0   | 0.0   | 0.0  | 0.0  | 0.0   | 0.0  | 0.0   | 0.0   | 0.0  | 0.0  | 0.0   |
| Kcne3   | 0.1  | 0.0   | 0.0   | 0.4  | 0.2  | 0.0   | 0.0  | 0.1   | 0.1   | 0.0  | 0.0  | 0.0   |
| Kcne4   | 78.7 | 128.2 | 125.7 | 85.7 | 78.5 | 107.5 | 87.1 | 132.9 | 136.6 | 39.8 | 45.5 | 100.4 |
| Kcnf1   | 0.0  | 0.0   | 0.0   | 0.0  | 0.0  | 0.1   | 0.0  | 0.0   | 0.0   | 0.0  | 0.0  | 0.0   |
| Kcng2   | 0.1  | 0.1   | 0.0   | 0.0  | 0.0  | 0.0   | 0.1  | 0.1   | 0.0   | 0.0  | 0.0  | 0.0   |
| Kcng4   | 0.0  | 0.0   | 0.0   | 0.1  | 0.1  | 0.1   | 0.1  | 0.0   | 0.0   | 0.0  | 0.0  | 0.0   |
| Kcnh1   | 0.2  | 0.2   | 0.4   | 0.1  | 0.2  | 0.2   | 0.1  | 0.2   | 0.2   | 0.1  | 0.1  | 0.2   |
| Kcnh2   | 0.2  | 0.1   | 0.1   | 0.1  | 0.1  | 0.1   | 0.2  | 0.2   | 0.2   | 0.1  | 0.2  | 0.1   |
| Kcnh3   | 0.0  | 0.0   | 0.0   | 0.0  | 0.0  | 0.0   | 0.0  | 0.0   | 0.0   | 0.0  | 0.0  | 0.0   |
| Kcnh4   | 0.0  | 0.0   | 0.0   | 0.0  | 0.0  | 0.0   | 0.0  | 0.0   | 0.0   | 0.0  | 0.0  | 0.0   |
| Kcnh5   | 0.1  | 0.0   | 0.1   | 0.0  | 0.1  | 0.1   | 0.0  | 0.0   | 0.0   | 0.0  | 0.0  | 0.0   |
| Kcnip1  | 0.0  | 0.0   | 0.0   | 0.0  | 0.0  | 0.0   | 0.0  | 0.0   | 0.0   | 0.0  | 0.0  | 0.0   |
| Kcnip2  | 0.1  | 0.0   | 0.0   | 0.1  | 0.0  | 0.0   | 0.0  | 0.0   | 0.1   | 0.0  | 0.0  | 0.0   |
| Kcnip3  | 0.4  | 0.3   | 0.6   | 0.6  | 0.6  | 0.4   | 0.5  | 0.9   | 0.5   | 0.3  | 0.3  | 0.4   |
| Kcnip4  | 0.1  | 0.2   | 0.0   | 0.2  | 0.1  | 0.3   | 0.2  | 0.2   | 0.3   | 0.2  | 0.1  | 0.2   |
| Kcnj10  | 0.0  | 0.0   | 0.0   | 0.0  | 0.0  | 0.0   | 0.0  | 0.0   | 0.0   | 0.0  | 0.0  | 0.0   |
| Kcnj12  | 0.0  | 0.0   | 0.0   | 0.0  | 0.0  | 0.0   | 0.0  | 0.0   | 0.0   | 0.0  | 0.0  | 0.0   |
| Kcnj13  | 0.1  | 0.2   | 0.2   | 0.0  | 0.0  | 0.1   | 0.1  | 0.1   | 0.1   | 0.2  | 0.2  | 0.1   |
| Kcnj14  | 0.0  | 0.0   | 0.1   | 0.0  | 0.1  | 0.0   | 0.0  | 0.0   | 0.0   | 0.1  | 0.0  | 0.0   |
| Kcnj15  | 3.6  | 2.6   | 3.3   | 3.7  | 4.4  | 3.6   | 5.3  | 2.8   | 3.2   | 5.4  | 4.5  | 7.1   |
| Kcnj2   | 0.2  | 0.1   | 0.1   | 1.7  | 2.4  | 0.0   | 0.3  | 0.3   | 0.2   | 0.2  | 0.3  | 0.3   |
| Kcnj4   | 1.9  | 1.8   | 1.2   | 1.5  | 1.6  | 2.3   | 1.1  | 0.8   | 0.8   | 1.4  | 0.8  | 1.3   |
| Kcnj5   | 0.0  | 0.1   | 0.1   | 0.0  | 0.0  | 0.0   | 0.0  | 0.0   | 0.0   | 0.0  | 0.0  | 0.0   |
| Kcnj6   | 0.0  | 0.0   | 0.1   | 0.0  | 0.0  | 0.1   | 0.0  | 0.0   | 0.0   | 0.0  | 0.0  | 0.0   |
| Kcnj8   | 0.0  | 0.1   | 0.1   | 0.0  | 0.0  | 0.0   | 0.0  | 0.1   | 0.2   | 0.1  | 0.1  | 0.1   |

Online Table 1

|          |       |       |       |       |       |       |       |       |       |       |       |       |
|----------|-------|-------|-------|-------|-------|-------|-------|-------|-------|-------|-------|-------|
| Kcnj9    | 0.0   | 0.0   | 0.0   | 0.0   | 0.0   | 0.1   | 0.0   | 0.0   | 0.0   | 0.0   | 0.0   | 0.0   |
| Kcnk1    | 0.0   | 0.0   | 0.0   | 0.0   | 0.0   | 0.0   | 0.0   | 0.0   | 0.0   | 0.0   | 0.0   | 0.0   |
| Kcnk12   | 0.0   | 0.0   | 0.0   | 0.1   | 0.0   | 0.0   | 0.0   | 0.0   | 0.0   | 0.0   | 0.0   | 0.0   |
| Kcnk13   | 0.2   | 0.0   | 0.0   | 1.3   | 2.9   | 0.0   | 0.3   | 0.0   | 0.1   | 0.3   | 0.1   | 0.1   |
| Kcnk15   | 0.0   | 0.0   | 0.1   | 0.0   | 0.0   | 0.0   | 0.0   | 0.1   | 0.0   | 0.0   | 0.1   | 0.0   |
| Kcnk2    | 1.4   | 1.2   | 0.6   | 2.5   | 1.3   | 1.8   | 1.2   | 0.8   | 0.8   | 0.5   | 0.6   | 0.5   |
| Kcnk5    | 0.1   | 0.1   | 0.2   | 0.1   | 0.2   | 0.1   | 0.2   | 0.2   | 0.2   | 0.0   | 0.3   | 0.1   |
| Kcnk6    | 0.2   | 0.2   | 0.1   | 0.9   | 1.0   | 0.1   | 0.1   | 0.2   | 0.1   | 0.2   | 0.1   | 0.2   |
| Kcnk7    | 0.1   | 0.0   | 0.1   | 0.1   | 0.3   | 0.0   | 0.2   | 0.1   | 0.1   | 0.2   | 0.2   | 0.0   |
| Kcnma1   | 0.4   | 0.3   | 0.2   | 0.8   | 0.3   | 0.8   | 0.2   | 0.4   | 0.3   | 0.5   | 0.9   | 0.4   |
| Kcnmb1   | 0.2   | 0.0   | 0.0   | 0.3   | 0.1   | 0.3   | 0.1   | 0.0   | 0.1   | 0.0   | 0.0   | 0.0   |
| Kcnmb3   | 0.1   | 0.1   | 0.2   | 0.0   | 0.1   | 0.0   | 0.0   | 0.0   | 0.0   | 0.0   | 0.1   | 0.0   |
| Kcnmb4   | 0.3   | 0.0   | 0.0   | 0.5   | 0.0   | 0.1   | 0.0   | 0.1   | 0.0   | 0.0   | 0.0   | 0.0   |
| Kcnn1    | 1.0   | 0.8   | 1.0   | 0.9   | 0.6   | 1.4   | 0.7   | 0.6   | 0.7   | 0.8   | 0.8   | 0.8   |
| Kcnn3    | 0.5   | 0.3   | 0.3   | 0.8   | 0.6   | 0.8   | 0.5   | 0.4   | 0.2   | 0.1   | 0.2   | 0.1   |
| Kcnn4    | 1.0   | 0.3   | 0.2   | 7.7   | 13.5  | 0.2   | 1.5   | 0.2   | 0.2   | 0.9   | 0.2   | 0.7   |
| Kcnq1    | 0.0   | 0.0   | 0.1   | 0.2   | 0.0   | 0.0   | 0.0   | 0.1   | 0.0   | 0.0   | 0.0   | 0.0   |
| Kcnq1ot1 | 0.4   | 0.7   | 0.5   | 0.4   | 0.5   | 0.5   | 0.7   | 0.5   | 0.3   | 0.5   | 0.5   | 0.4   |
| Kcnq3    | 0.0   | 0.0   | 0.0   | 0.0   | 0.0   | 0.0   | 0.0   | 0.0   | 0.0   | 0.0   | 0.0   | 0.0   |
| Kcnq4    | 0.3   | 0.4   | 0.5   | 0.3   | 0.1   | 0.5   | 0.2   | 0.2   | 0.3   | 0.2   | 0.1   | 0.1   |
| Kcnq5    | 0.2   | 0.2   | 0.1   | 0.2   | 0.1   | 0.3   | 0.0   | 0.0   | 0.0   | 0.1   | 0.0   | 0.1   |
| Kcng     | 0.1   | 0.2   | 0.1   | 0.1   | 0.4   | 0.1   | 0.1   | 0.2   | 0.1   | 0.1   | 0.1   | 0.1   |
| Kcns1    | 0.1   | 0.1   | 0.1   | 0.1   | 0.1   | 0.1   | 0.0   | 0.2   | 0.3   | 0.1   | 0.1   | 0.1   |
| Kcns3    | 0.1   | 0.1   | 0.1   | 0.0   | 0.2   | 0.0   | 0.1   | 0.1   | 0.6   | 0.3   | 0.1   | 0.1   |
| Kcnt1    | 0.0   | 0.0   | 0.0   | 0.0   | 0.0   | 0.0   | 0.0   | 0.0   | 0.0   | 0.0   | 0.0   | 0.0   |
| Kcnt2    | 3.3   | 4.7   | 5.5   | 2.1   | 2.2   | 2.5   | 2.3   | 4.9   | 3.3   | 2.1   | 2.7   | 2.6   |
| Kcnu1    | 0.2   | 0.2   | 0.2   | 0.3   | 0.2   | 0.2   | 0.1   | 0.0   | 0.1   | 0.2   | 0.1   | 0.1   |
| Kcnv2    | 0.0   | 0.0   | 0.1   | 0.0   | 0.0   | 0.0   | 0.0   | 0.0   | 0.0   | 0.0   | 0.0   | 0.0   |
| Kcp      | 0.2   | 0.8   | 0.8   | 0.1   | 0.3   | 0.1   | 0.1   | 0.4   | 0.5   | 0.2   | 0.1   | 0.2   |
| Kctd1    | 1.6   | 1.7   | 1.5   | 2.2   | 1.6   | 1.9   | 1.5   | 1.6   | 1.4   | 2.9   | 2.2   | 2.0   |
| Kctd10   | 96.7  | 84.3  | 57.5  | 112.3 | 75.8  | 106.3 | 96.3  | 56.8  | 79.9  | 91.2  | 82.4  | 77.4  |
| Kctd11   | 9.5   | 11.5  | 12.6  | 9.0   | 16.1  | 7.1   | 16.2  | 20.8  | 17.7  | 14.9  | 14.3  | 14.9  |
| Kctd12   | 1.3   | 0.5   | 0.8   | 3.3   | 14.2  | 0.4   | 2.9   | 1.1   | 0.8   | 2.2   | 1.2   | 1.8   |
| Kctd12b  | 0.2   | 0.4   | 0.7   | 0.4   | 0.5   | 0.3   | 0.4   | 0.4   | 0.3   | 0.2   | 0.2   | 0.4   |
| Kctd13   | 4.6   | 4.3   | 3.7   | 4.4   | 4.8   | 4.7   | 3.9   | 3.8   | 3.8   | 4.1   | 3.9   | 3.8   |
| Kctd14   | 0.1   | 0.0   | 0.1   | 0.0   | 0.0   | 0.0   | 0.0   | 0.2   | 0.1   | 0.0   | 0.0   | 0.1   |
| Kctd15   | 3.4   | 3.5   | 5.8   | 2.0   | 3.5   | 1.9   | 5.4   | 9.4   | 7.1   | 7.0   | 7.8   | 4.6   |
| Kctd16   | 0.1   | 0.0   | 0.0   | 0.2   | 0.0   | 0.1   | 0.0   | 0.1   | 0.0   | 0.0   | 0.0   | 0.0   |
| Kctd17   | 11.6  | 12.7  | 14.2  | 14.6  | 11.8  | 14.0  | 15.8  | 13.8  | 13.9  | 12.7  | 13.1  | 12.0  |
| Kctd18   | 5.5   | 4.7   | 3.6   | 5.9   | 4.2   | 5.2   | 4.2   | 4.2   | 4.5   | 4.8   | 4.3   | 5.5   |
| Kctd2    | 14.8  | 10.5  | 10.5  | 14.6  | 10.6  | 15.4  | 11.3  | 9.2   | 10.9  | 9.3   | 13.0  | 11.3  |
| Kctd20   | 23.2  | 22.7  | 19.9  | 23.6  | 22.0  | 21.6  | 22.5  | 20.2  | 21.0  | 20.0  | 21.8  | 18.4  |
| Kctd21   | 3.9   | 3.9   | 3.0   | 4.2   | 4.2   | 4.0   | 3.5   | 3.3   | 3.8   | 3.7   | 4.5   | 3.4   |
| Kctd3    | 9.5   | 9.3   | 9.4   | 10.0  | 8.5   | 10.7  | 8.8   | 9.2   | 9.6   | 8.6   | 9.3   | 8.6   |
| Kctd4    | 0.1   | 0.1   | 0.1   | 0.0   | 0.1   | 0.1   | 0.0   | 0.0   | 0.0   | 0.0   | 0.1   | 0.1   |
| Kctd5    | 28.2  | 30.2  | 27.8  | 22.2  | 28.4  | 20.6  | 29.7  | 28.4  | 36.6  | 28.1  | 31.0  | 30.7  |
| Kctd6    | 3.6   | 2.9   | 3.6   | 3.3   | 3.8   | 3.7   | 3.1   | 3.6   | 3.3   | 3.0   | 3.2   | 3.6   |
| Kctd7    | 2.1   | 3.0   | 2.5   | 2.6   | 3.1   | 2.6   | 3.4   | 3.1   | 3.5   | 2.3   | 2.8   | 2.7   |
| Kctd8    | 0.0   | 0.0   | 0.0   | 0.0   | 0.0   | 0.0   | 0.0   | 0.0   | 0.0   | 0.0   | 0.0   | 0.0   |
| Kctd9    | 6.8   | 7.3   | 7.3   | 5.8   | 6.9   | 5.4   | 9.6   | 8.5   | 9.8   | 6.6   | 8.7   | 7.4   |
| Kdelc1   | 10.5  | 13.3  | 13.0  | 8.2   | 11.4  | 11.6  | 12.3  | 15.0  | 13.4  | 14.0  | 13.8  | 12.9  |
| Kdelc2   | 12.0  | 12.9  | 17.7  | 11.9  | 13.6  | 13.1  | 17.6  | 20.0  | 18.1  | 15.1  | 17.0  | 19.0  |
| Kdelr1   | 63.5  | 59.2  | 56.4  | 65.7  | 57.7  | 69.1  | 68.0  | 74.4  | 65.5  | 67.2  | 65.5  | 63.4  |
| Kdelr2   | 119.9 | 106.9 | 109.3 | 125.4 | 113.6 | 118.0 | 140.8 | 145.9 | 126.0 | 120.3 | 139.8 | 130.9 |
| Kdelr3   | 58.4  | 53.7  | 44.4  | 55.3  | 53.3  | 51.3  | 57.4  | 60.7  | 60.1  | 48.9  | 60.4  | 55.2  |
| Kdm1a    | 14.9  | 15.4  | 16.1  | 13.4  | 13.3  | 16.0  | 15.5  | 18.2  | 17.1  | 19.1  | 16.9  | 18.2  |
| Kdm1b    | 4.3   | 3.8   | 3.7   | 5.3   | 3.6   | 5.4   | 3.4   | 3.0   | 3.2   | 3.6   | 3.8   | 3.5   |

Online Table 1

|           |      |      |      |      |      |      |      |      |      |      |      |      |
|-----------|------|------|------|------|------|------|------|------|------|------|------|------|
| Kdm2a     | 10.7 | 11.4 | 12.3 | 12.2 | 11.5 | 11.2 | 12.5 | 12.6 | 10.9 | 10.8 | 11.9 | 11.4 |
| Kdm2b     | 4.2  | 4.7  | 4.3  | 3.9  | 4.3  | 4.4  | 4.5  | 4.1  | 4.2  | 4.2  | 4.6  | 4.2  |
| Kdm3a     | 7.7  | 7.5  | 6.9  | 6.0  | 8.0  | 6.6  | 6.9  | 6.4  | 7.9  | 9.5  | 7.5  | 8.8  |
| Kdm3b     | 6.1  | 7.0  | 7.4  | 6.8  | 6.3  | 6.2  | 8.1  | 6.9  | 6.9  | 6.8  | 7.1  | 7.0  |
| Kdm4a     | 19.9 | 18.6 | 18.5 | 18.8 | 17.9 | 17.8 | 19.9 | 21.2 | 21.3 | 18.2 | 19.6 | 18.1 |
| Kdm4b     | 4.4  | 5.3  | 5.2  | 3.1  | 4.3  | 4.3  | 4.8  | 5.6  | 6.1  | 4.8  | 4.8  | 5.0  |
| Kdm4c     | 9.2  | 8.4  | 8.3  | 7.2  | 7.1  | 6.8  | 7.1  | 6.9  | 8.1  | 9.3  | 8.9  | 9.2  |
| Kdm4d     | 0.2  | 0.2  | 0.2  | 0.2  | 0.3  | 0.2  | 0.2  | 0.1  | 0.1  | 0.1  | 0.0  | 0.2  |
| Kdm5a     | 11.0 | 11.6 | 10.7 | 10.4 | 9.6  | 10.4 | 9.8  | 9.5  | 9.1  | 10.5 | 10.4 | 11.1 |
| Kdm5b     | 11.7 | 13.8 | 11.8 | 11.4 | 10.9 | 13.3 | 10.2 | 12.2 | 12.8 | 12.8 | 12.2 | 12.6 |
| Kdm5c     | 11.5 | 12.4 | 12.3 | 11.9 | 12.0 | 10.7 | 13.1 | 13.6 | 13.8 | 13.4 | 12.7 | 12.8 |
| Kdm5d     | 7.8  | 6.4  | 7.3  | 5.4  | 5.5  | 7.2  | 6.1  | 7.3  | 6.2  | 6.8  | 7.3  | 6.8  |
| Kdm6a     | 2.6  | 3.1  | 3.3  | 2.3  | 2.6  | 2.5  | 2.2  | 3.0  | 3.0  | 2.8  | 2.5  | 2.8  |
| Kdm6b     | 0.4  | 0.6  | 0.5  | 0.4  | 0.4  | 0.5  | 0.4  | 0.7  | 0.8  | 0.7  | 0.4  | 0.4  |
| Kdm8      | 0.9  | 1.2  | 0.8  | 1.3  | 1.1  | 0.7  | 1.2  | 1.1  | 0.9  | 1.2  | 1.3  | 1.2  |
| Kdr       | 0.3  | 0.1  | 0.3  | 0.1  | 0.1  | 0.0  | 0.5  | 0.7  | 0.6  | 0.6  | 0.2  | 0.2  |
| Kdsr      | 11.1 | 7.0  | 5.4  | 12.6 | 9.3  | 9.9  | 9.7  | 7.3  | 8.1  | 9.7  | 11.2 | 8.9  |
| Keap1     | 15.0 | 13.6 | 14.0 | 17.0 | 14.0 | 17.5 | 16.4 | 14.5 | 15.7 | 16.8 | 14.8 | 15.5 |
| Khdc1b    | 0.0  | 0.0  | 0.0  | 0.0  | 0.0  | 0.0  | 0.0  | 0.1  | 0.0  | 0.0  | 0.1  | 0.0  |
| Khdrbs1   | 14.4 | 15.3 | 17.3 | 13.8 | 16.2 | 14.8 | 16.7 | 17.8 | 15.5 | 17.6 | 17.0 | 15.3 |
| Khdrbs3   | 16.6 | 22.0 | 30.3 | 16.9 | 18.8 | 15.2 | 28.1 | 33.3 | 24.5 | 17.0 | 25.8 | 24.4 |
| Khk       | 0.5  | 1.2  | 0.9  | 1.1  | 1.0  | 0.9  | 0.6  | 0.9  | 0.6  | 2.2  | 1.4  | 0.8  |
| Khynyn    | 5.2  | 7.4  | 7.2  | 4.4  | 5.7  | 6.5  | 6.0  | 6.1  | 7.1  | 5.9  | 4.7  | 6.2  |
| Khsrp     | 8.7  | 9.8  | 10.5 | 8.3  | 10.2 | 9.3  | 11.7 | 11.4 | 11.4 | 11.5 | 10.3 | 8.7  |
| Kidins220 | 33.1 | 28.0 | 27.7 | 33.5 | 29.3 | 30.3 | 30.8 | 26.7 | 27.9 | 33.1 | 36.0 | 34.7 |
| Kif11     | 1.7  | 3.3  | 5.1  | 0.4  | 5.0  | 0.6  | 6.5  | 2.6  | 5.2  | 2.5  | 4.7  | 2.7  |
| Kif13a    | 8.5  | 7.7  | 7.5  | 8.3  | 7.7  | 8.3  | 9.2  | 8.1  | 8.0  | 7.9  | 8.7  | 8.4  |
| Kif13b    | 10.1 | 11.4 | 11.3 | 10.6 | 9.7  | 9.3  | 11.3 | 10.1 | 10.4 | 12.2 | 9.9  | 11.7 |
| Kif14     | 0.2  | 0.4  | 0.8  | 0.1  | 0.6  | 0.0  | 0.9  | 0.3  | 0.6  | 0.3  | 0.5  | 0.4  |
| Kif15     | 0.6  | 1.5  | 2.2  | 0.3  | 1.9  | 0.3  | 2.4  | 1.0  | 1.6  | 0.7  | 1.1  | 1.0  |
| Kif16b    | 6.6  | 6.2  | 6.6  | 7.8  | 6.4  | 6.9  | 5.8  | 6.0  | 5.7  | 5.7  | 6.6  | 7.1  |
| Kif17     | 0.1  | 0.0  | 0.1  | 0.0  | 0.0  | 0.1  | 0.0  | 0.0  | 0.1  | 0.2  | 0.1  | 0.0  |
| Kif18a    | 1.0  | 1.6  | 2.6  | 0.7  | 1.9  | 0.9  | 2.5  | 1.1  | 1.7  | 1.1  | 1.9  | 1.4  |
| Kif18b    | 0.7  | 2.0  | 3.3  | 0.5  | 2.9  | 0.3  | 4.6  | 1.3  | 2.9  | 1.1  | 2.2  | 1.3  |
| Kif19a    | 0.1  | 0.0  | 0.1  | 0.2  | 0.1  | 0.0  | 0.0  | 0.0  | 0.0  | 0.1  | 0.1  | 0.0  |
| Kif1a     | 38.5 | 34.3 | 22.2 | 39.1 | 25.4 | 44.1 | 27.6 | 17.6 | 17.6 | 16.8 | 22.8 | 21.1 |
| Kif1b     | 27.7 | 28.9 | 26.0 | 29.8 | 25.4 | 30.0 | 27.1 | 24.9 | 23.5 | 23.9 | 29.0 | 26.3 |
| Kif1c     | 72.1 | 58.2 | 50.2 | 82.0 | 52.4 | 88.5 | 66.8 | 50.3 | 56.1 | 54.9 | 65.2 | 57.8 |
| Kif20a    | 4.4  | 8.0  | 13.4 | 1.9  | 11.1 | 1.7  | 15.2 | 6.0  | 11.6 | 5.8  | 10.6 | 7.0  |
| Kif20b    | 1.2  | 2.8  | 5.1  | 0.7  | 3.9  | 0.5  | 5.0  | 1.8  | 3.7  | 1.7  | 3.2  | 2.3  |
| Kif21a    | 3.8  | 3.0  | 3.9  | 3.5  | 2.6  | 3.4  | 2.6  | 3.3  | 2.6  | 4.3  | 3.3  | 4.0  |
| Kif21b    | 1.0  | 1.4  | 1.2  | 1.5  | 1.8  | 1.4  | 1.1  | 1.5  | 1.1  | 0.6  | 0.8  | 0.6  |
| Kif22     | 1.6  | 3.6  | 5.2  | 0.9  | 4.2  | 0.6  | 6.7  | 3.0  | 5.3  | 2.3  | 4.5  | 2.3  |
| Kif23     | 1.3  | 2.1  | 3.8  | 0.7  | 3.8  | 0.3  | 4.4  | 1.9  | 2.8  | 1.5  | 3.0  | 2.0  |
| Kif24     | 0.3  | 0.4  | 0.5  | 0.3  | 0.4  | 0.2  | 0.5  | 0.4  | 0.4  | 0.2  | 0.2  | 0.3  |
| Kif26a    | 0.2  | 0.3  | 0.3  | 0.1  | 0.2  | 0.2  | 0.3  | 0.2  | 0.2  | 0.1  | 0.1  | 0.1  |
| Kif26b    | 7.3  | 12.6 | 18.7 | 6.1  | 14.1 | 4.8  | 17.7 | 22.9 | 23.9 | 16.9 | 15.1 | 18.8 |
| Kif27     | 0.1  | 0.1  | 0.2  | 0.0  | 0.1  | 0.2  | 0.1  | 0.1  | 0.1  | 0.1  | 0.1  | 0.0  |
| Kif2a     | 5.6  | 5.3  | 4.7  | 6.8  | 4.6  | 6.9  | 5.3  | 4.3  | 4.5  | 4.7  | 5.2  | 4.6  |
| Kif2c     | 1.7  | 3.7  | 6.1  | 0.5  | 4.8  | 0.5  | 7.5  | 2.3  | 5.1  | 2.4  | 4.2  | 3.1  |
| Kif3a     | 7.9  | 7.7  | 8.1  | 9.0  | 6.5  | 9.1  | 7.1  | 6.5  | 6.2  | 6.8  | 8.3  | 8.5  |
| Kif3b     | 14.9 | 12.6 | 11.1 | 15.7 | 13.0 | 15.1 | 11.9 | 10.7 | 10.6 | 10.9 | 12.3 | 13.1 |
| Kif3c     | 5.5  | 5.5  | 5.0  | 6.6  | 5.2  | 7.3  | 5.9  | 4.0  | 5.1  | 4.6  | 5.4  | 5.1  |
| Kif4      | 1.4  | 2.6  | 4.0  | 0.6  | 3.8  | 0.5  | 5.0  | 1.9  | 3.7  | 2.0  | 3.7  | 2.3  |
| Kif5a     | 0.9  | 0.8  | 0.5  | 0.8  | 0.6  | 0.9  | 0.6  | 0.5  | 0.4  | 0.6  | 0.5  | 0.5  |
| Kif5b     | 83.4 | 66.2 | 53.4 | 94.0 | 65.0 | 81.6 | 65.8 | 56.1 | 72.5 | 62.0 | 85.1 | 79.2 |
| Kif5c     | 1.8  | 1.6  | 1.6  | 1.9  | 1.5  | 1.4  | 1.7  | 1.0  | 0.9  | 1.2  | 1.1  | 1.1  |

Online Table 1

|         |      |      |      |      |      |      |      |      |      |      |      |      |
|---------|------|------|------|------|------|------|------|------|------|------|------|------|
| Kif6    | 0.1  | 0.1  | 0.1  | 0.2  | 0.1  | 0.2  | 0.0  | 0.1  | 0.0  | 0.1  | 0.2  | 0.1  |
| Kif7    | 3.3  | 4.9  | 4.4  | 3.0  | 2.5  | 3.1  | 3.5  | 4.7  | 3.7  | 3.4  | 3.4  | 3.4  |
| Kif9    | 1.6  | 1.3  | 1.4  | 1.6  | 1.1  | 1.8  | 1.1  | 1.1  | 0.8  | 1.1  | 1.2  | 1.2  |
| Kifap3  | 14.4 | 14.2 | 14.3 | 14.3 | 12.9 | 16.3 | 13.3 | 12.7 | 14.4 | 14.1 | 15.9 | 17.0 |
| Kifc1   | 3.7  | 5.1  | 6.3  | 2.0  | 6.3  | 2.0  | 7.1  | 2.6  | 6.0  | 4.4  | 5.1  | 3.7  |
| Kifc2   | 0.7  | 0.8  | 1.0  | 0.8  | 0.5  | 0.8  | 0.6  | 0.8  | 1.0  | 0.7  | 0.3  | 0.6  |
| Kifc3   | 14.0 | 11.3 | 9.2  | 12.8 | 10.6 | 10.9 | 13.5 | 10.4 | 12.6 | 16.4 | 14.0 | 11.6 |
| Kifc5b  | 1.7  | 2.9  | 3.5  | 0.9  | 3.6  | 0.8  | 3.7  | 1.4  | 2.8  | 1.8  | 2.7  | 1.8  |
| Kin     | 7.8  | 8.8  | 9.8  | 8.6  | 6.9  | 7.3  | 8.7  | 8.0  | 7.4  | 9.7  | 10.5 | 10.4 |
| Kirrel  | 16.8 | 25.2 | 28.4 | 16.4 | 19.5 | 19.3 | 32.6 | 28.8 | 33.8 | 21.5 | 22.4 | 21.9 |
| Kirrel3 | 0.1  | 0.0  | 0.1  | 0.1  | 0.1  | 0.1  | 0.1  | 0.1  | 0.1  | 0.1  | 0.1  | 0.1  |
| Kiss1r  | 0.5  | 0.5  | 0.5  | 0.4  | 0.3  | 0.5  | 0.5  | 0.4  | 0.5  | 0.4  | 0.4  | 0.4  |
| Kit     | 0.3  | 0.2  | 0.3  | 0.2  | 0.1  | 0.1  | 0.2  | 0.6  | 0.4  | 0.1  | 0.1  | 0.0  |
| Kitl    | 20.1 | 18.3 | 10.3 | 30.6 | 14.3 | 33.7 | 9.7  | 7.9  | 7.8  | 8.6  | 8.0  | 8.1  |
| Klb     | 0.0  | 0.0  | 0.0  | 0.1  | 0.0  | 0.0  | 0.1  | 0.0  | 0.0  | 0.0  | 0.0  | 0.0  |
| Klc1    | 73.2 | 62.6 | 60.2 | 76.9 | 56.4 | 72.2 | 77.2 | 61.9 | 61.8 | 57.3 | 72.1 | 66.4 |
| Klc2    | 5.1  | 4.6  | 4.7  | 6.4  | 4.7  | 6.1  | 5.4  | 4.6  | 4.9  | 4.8  | 5.9  | 4.9  |
| Klc3    | 2.9  | 2.3  | 2.3  | 1.5  | 1.6  | 3.2  | 0.8  | 1.0  | 1.4  | 4.3  | 2.6  | 2.0  |
| Klc4    | 7.4  | 7.5  | 6.6  | 10.0 | 7.8  | 7.3  | 6.6  | 7.2  | 7.1  | 8.4  | 7.2  | 6.6  |
| Klf1    | 0.1  | 0.2  | 0.1  | 0.2  | 0.1  | 0.1  | 0.0  | 0.1  | 0.0  | 0.1  | 0.0  | 0.0  |
| Klf10   | 2.5  | 2.1  | 2.7  | 2.4  | 4.7  | 1.2  | 3.9  | 5.9  | 4.4  | 5.0  | 4.1  | 3.6  |
| Klf11   | 1.8  | 2.2  | 2.1  | 2.5  | 2.3  | 2.6  | 2.2  | 2.3  | 2.0  | 2.6  | 1.9  | 1.9  |
| Klf12   | 0.7  | 0.9  | 1.1  | 0.4  | 0.5  | 0.8  | 0.7  | 0.9  | 0.8  | 0.4  | 0.7  | 0.4  |
| Klf13   | 4.4  | 4.9  | 4.5  | 4.2  | 5.0  | 4.1  | 4.9  | 6.5  | 5.1  | 3.4  | 4.1  | 4.1  |
| Klf15   | 5.4  | 4.8  | 5.0  | 3.9  | 2.2  | 7.0  | 2.7  | 3.3  | 3.8  | 2.6  | 2.4  | 3.2  |
| Klf16   | 4.1  | 4.1  | 3.7  | 3.8  | 3.8  | 3.3  | 4.8  | 4.5  | 5.3  | 3.5  | 4.0  | 3.6  |
| Klf17   | 0.0  | 0.0  | 0.0  | 0.0  | 0.0  | 0.0  | 0.0  | 0.0  | 0.0  | 0.0  | 0.0  | 0.0  |
| Klf2    | 0.4  | 0.6  | 0.2  | 1.2  | 0.9  | 1.0  | 1.8  | 2.3  | 2.3  | 1.9  | 1.3  | 1.0  |
| Klf3    | 18.1 | 20.9 | 24.7 | 19.9 | 16.4 | 20.2 | 27.0 | 29.6 | 24.5 | 19.3 | 25.8 | 23.4 |
| Klf4    | 21.5 | 24.0 | 22.4 | 15.8 | 16.3 | 19.5 | 28.9 | 35.8 | 27.6 | 17.1 | 29.9 | 22.3 |
| Klf5    | 0.6  | 0.3  | 0.3  | 0.3  | 0.3  | 0.4  | 0.5  | 0.5  | 0.6  | 0.4  | 0.7  | 0.3  |
| Klf6    | 31.4 | 33.4 | 32.2 | 36.9 | 39.1 | 32.9 | 44.6 | 35.3 | 47.2 | 33.7 | 43.2 | 38.5 |
| Klf7    | 2.7  | 3.2  | 3.8  | 3.6  | 3.3  | 3.7  | 3.6  | 4.2  | 3.3  | 2.7  | 2.5  | 2.5  |
| Klf8    | 0.0  | 0.0  | 0.1  | 0.1  | 0.2  | 0.1  | 0.0  | 0.1  | 0.0  | 0.1  | 0.0  | 0.0  |
| Klf9    | 8.5  | 8.2  | 9.6  | 8.2  | 6.3  | 10.1 | 8.7  | 10.8 | 9.0  | 12.1 | 10.0 | 12.1 |
| Klhdc1  | 2.8  | 3.3  | 3.5  | 3.0  | 2.1  | 3.7  | 2.3  | 2.5  | 2.0  | 2.7  | 2.8  | 3.6  |
| Klhdc10 | 5.8  | 5.8  | 5.9  | 6.1  | 5.6  | 6.2  | 5.4  | 5.2  | 5.2  | 5.3  | 5.2  | 5.4  |
| Klhdc2  | 34.9 | 35.7 | 30.5 | 31.9 | 26.8 | 40.8 | 29.2 | 27.0 | 30.4 | 33.9 | 32.1 | 31.0 |
| Klhdc3  | 9.2  | 11.4 | 11.2 | 10.5 | 12.4 | 10.6 | 12.3 | 11.5 | 12.0 | 13.3 | 10.6 | 9.5  |
| Klhdc4  | 11.1 | 10.6 | 10.0 | 13.0 | 11.4 | 11.0 | 11.9 | 11.0 | 10.2 | 12.3 | 14.0 | 12.2 |
| Klhdc5  | 6.9  | 6.9  | 6.9  | 6.1  | 6.3  | 6.2  | 6.0  | 6.7  | 6.4  | 6.9  | 7.1  | 6.8  |
| Klhdc7a | 2.2  | 1.6  | 1.6  | 1.1  | 1.4  | 1.0  | 0.9  | 0.7  | 0.7  | 1.4  | 1.1  | 1.3  |
| Klhdc8a | 3.1  | 2.3  | 1.0  | 4.7  | 2.6  | 3.3  | 2.4  | 1.4  | 2.3  | 3.7  | 4.4  | 1.9  |
| Klhdc8b | 2.4  | 2.6  | 2.8  | 1.7  | 1.7  | 1.9  | 1.6  | 1.6  | 2.9  | 1.8  | 1.4  | 1.7  |
| Klhdc9  | 1.1  | 0.6  | 0.9  | 0.7  | 1.0  | 1.0  | 0.9  | 0.9  | 0.6  | 1.4  | 0.9  | 0.9  |
| Klh10   | 0.3  | 0.4  | 0.4  | 0.1  | 0.4  | 0.4  | 0.3  | 0.3  | 0.2  | 0.2  | 0.2  | 0.2  |
| Klh11   | 10.2 | 12.2 | 10.4 | 11.0 | 9.4  | 10.3 | 9.6  | 9.5  | 9.7  | 11.5 | 10.8 | 11.1 |
| Klh12   | 8.6  | 8.0  | 7.2  | 6.1  | 6.3  | 9.2  | 6.0  | 5.8  | 6.1  | 6.5  | 5.8  | 6.6  |
| Klh13   | 27.4 | 22.5 | 13.6 | 18.7 | 16.9 | 11.8 | 27.3 | 16.0 | 43.4 | 28.7 | 40.0 | 44.1 |
| Klh15   | 1.8  | 2.2  | 1.7  | 1.5  | 2.1  | 1.4  | 2.2  | 1.9  | 1.8  | 2.0  | 1.9  | 2.1  |
| Klh17   | 3.7  | 4.3  | 3.4  | 4.3  | 3.0  | 6.4  | 3.0  | 2.9  | 3.5  | 3.6  | 3.1  | 3.2  |
| Klh18   | 3.4  | 3.5  | 3.2  | 3.4  | 3.2  | 3.0  | 3.7  | 3.6  | 3.3  | 3.2  | 3.3  | 3.1  |
| Klh12   | 10.8 | 9.1  | 8.9  | 12.2 | 9.7  | 8.7  | 11.2 | 8.0  | 8.8  | 11.0 | 12.1 | 11.4 |
| Klh20   | 7.1  | 7.9  | 8.4  | 8.7  | 7.7  | 8.1  | 8.0  | 7.8  | 7.5  | 7.8  | 8.0  | 8.7  |
| Klh21   | 9.6  | 9.2  | 7.6  | 8.3  | 9.3  | 11.4 | 9.6  | 7.7  | 9.5  | 11.8 | 8.6  | 8.3  |
| Klh22   | 25.9 | 23.1 | 18.7 | 24.4 | 19.7 | 25.1 | 19.3 | 19.1 | 19.3 | 24.4 | 21.8 | 19.4 |
| Klh23   | 1.6  | 1.5  | 1.3  | 1.0  | 0.9  | 2.3  | 1.4  | 1.2  | 1.5  | 1.5  | 1.7  | 1.6  |

Online Table 1

|         |      |      |      |      |      |      |      |      |      |      |      |      |
|---------|------|------|------|------|------|------|------|------|------|------|------|------|
| Klhl24  | 20.5 | 23.4 | 21.6 | 21.3 | 20.8 | 22.0 | 16.3 | 17.2 | 20.0 | 25.6 | 23.4 | 26.5 |
| Klhl25  | 5.8  | 5.0  | 4.5  | 4.9  | 6.3  | 4.9  | 5.7  | 5.3  | 5.7  | 4.4  | 4.6  | 5.5  |
| Klhl26  | 11.9 | 13.0 | 11.5 | 11.4 | 12.2 | 14.6 | 15.8 | 12.3 | 13.9 | 15.0 | 14.7 | 13.9 |
| Klhl28  | 4.7  | 6.4  | 5.7  | 5.5  | 5.4  | 5.9  | 4.8  | 3.9  | 5.9  | 5.5  | 4.8  | 5.6  |
| Klhl29  | 0.5  | 1.1  | 1.5  | 0.5  | 0.9  | 0.6  | 1.2  | 0.7  | 1.0  | 1.0  | 0.7  | 0.9  |
| Klhl3   | 0.0  | 0.0  | 0.2  | 0.1  | 0.0  | 0.1  | 0.1  | 0.1  | 0.1  | 0.1  | 0.0  | 0.0  |
| Klhl30  | 0.3  | 0.3  | 0.1  | 1.0  | 0.2  | 0.6  | 0.2  | 0.1  | 0.3  | 0.3  | 0.1  | 0.1  |
| Klhl31  | 0.0  | 0.0  | 0.0  | 0.0  | 0.0  | 0.0  | 0.0  | 0.0  | 0.0  | 0.0  | 0.0  | 0.0  |
| Klhl32  | 0.1  | 0.0  | 0.1  | 0.1  | 0.0  | 0.2  | 0.0  | 0.0  | 0.0  | 0.0  | 0.0  | 0.0  |
| Klhl33  | 0.1  | 0.0  | 0.2  | 0.3  | 0.2  | 0.1  | 0.2  | 0.2  | 0.2  | 0.2  | 0.2  | 0.1  |
| Klhl35  | 0.1  | 0.1  | 0.0  | 0.1  | 0.0  | 0.0  | 0.1  | 0.0  | 0.1  | 0.1  | 0.1  | 0.1  |
| Klhl36  | 3.6  | 4.2  | 3.9  | 4.3  | 3.0  | 4.2  | 3.4  | 3.9  | 3.6  | 3.2  | 2.3  | 2.9  |
| Klhl38  | 0.0  | 0.0  | 0.0  | 0.0  | 0.2  | 0.1  | 0.1  | 0.1  | 0.1  | 0.2  | 0.1  | 0.1  |
| Klhl4   | 0.1  | 0.0  | 0.1  | 0.0  | 0.0  | 0.0  | 0.1  | 0.1  | 0.1  | 0.0  | 0.0  | 0.0  |
| Klhl41  | 0.2  | 0.1  | 0.0  | 0.1  | 0.1  | 0.2  | 0.1  | 0.0  | 0.2  | 0.2  | 0.1  | 0.1  |
| Klhl5   | 33.8 | 33.7 | 33.1 | 34.0 | 32.6 | 32.0 | 38.7 | 25.5 | 27.9 | 29.5 | 34.7 | 33.6 |
| Klhl6   | 9.7  | 11.2 | 10.8 | 11.7 | 14.5 | 10.0 | 10.1 | 4.5  | 6.7  | 9.9  | 7.6  | 9.0  |
| Klhl7   | 9.9  | 8.3  | 8.0  | 9.0  | 6.8  | 9.7  | 7.3  | 7.4  | 7.7  | 9.2  | 9.4  | 10.7 |
| Klhl8   | 3.7  | 3.6  | 3.4  | 3.5  | 2.5  | 4.4  | 2.7  | 2.2  | 2.6  | 2.6  | 3.3  | 2.7  |
| Klhl9   | 33.7 | 34.4 | 37.5 | 32.8 | 35.0 | 36.9 | 33.9 | 39.9 | 38.5 | 45.0 | 43.6 | 44.6 |
| Klk10   | 0.1  | 0.1  | 0.0  | 0.2  | 0.1  | 0.0  | 0.0  | 0.0  | 0.0  | 0.1  | 0.0  | 0.1  |
| Klk8    | 2.9  | 0.5  | 0.2  | 2.8  | 0.3  | 3.1  | 0.5  | 0.1  | 0.3  | 0.3  | 0.5  | 0.6  |
| Klkb1   | 0.1  | 0.0  | 0.1  | 0.0  | 0.1  | 0.1  | 0.0  | 0.0  | 0.0  | 0.0  | 0.0  | 0.0  |
| Klra18  | 0.0  | 0.1  | 0.0  | 0.0  | 0.0  | 0.1  | 0.0  | 0.0  | 0.0  | 0.0  | 0.1  | 0.0  |
| Klra2   | 2.7  | 1.9  | 1.1  | 2.8  | 4.5  | 1.6  | 2.0  | 0.5  | 0.8  | 0.8  | 2.0  | 1.5  |
| Klra22  | 0.0  | 0.0  | 0.0  | 0.0  | 0.0  | 0.0  | 0.0  | 0.0  | 0.0  | 0.0  | 0.0  | 0.0  |
| Klra33  | 0.2  | 0.0  | 0.0  | 0.0  | 0.0  | 0.0  | 0.0  | 0.0  | 0.0  | 0.0  | 0.0  | 0.1  |
| Klra4   | 0.0  | 0.0  | 0.0  | 0.0  | 0.0  | 0.0  | 0.0  | 0.0  | 0.0  | 0.2  | 0.0  | 0.0  |
| Klrb1c  | 0.0  | 0.0  | 0.0  | 0.0  | 0.0  | 0.0  | 0.0  | 0.0  | 0.0  | 0.0  | 0.0  | 0.0  |
| Klrg2   | 0.7  | 0.5  | 0.3  | 0.4  | 0.3  | 0.3  | 0.5  | 0.9  | 0.7  | 0.7  | 0.6  | 0.6  |
| Kndc1   | 0.0  | 0.0  | 0.0  | 0.0  | 0.0  | 0.0  | 0.0  | 0.0  | 0.0  | 0.0  | 0.0  | 0.0  |
| Kng1    | 0.0  | 0.0  | 0.0  | 0.0  | 0.0  | 0.0  | 0.0  | 0.0  | 0.0  | 0.1  | 0.1  | 0.1  |
| Kng2    | 0.0  | 0.0  | 0.1  | 0.1  | 0.1  | 0.1  | 0.0  | 0.0  | 0.1  | 0.5  | 0.3  | 0.1  |
| Knstrn  | 1.6  | 2.7  | 4.8  | 0.8  | 4.1  | 0.7  | 6.2  | 2.3  | 4.3  | 2.0  | 3.9  | 2.6  |
| Kntc1   | 1.2  | 2.0  | 3.2  | 0.5  | 2.9  | 0.3  | 3.1  | 1.3  | 2.8  | 1.2  | 1.8  | 1.4  |
| Kpna1   | 17.2 | 17.8 | 15.0 | 18.5 | 16.8 | 17.7 | 15.1 | 13.4 | 15.0 | 16.2 | 17.0 | 16.2 |
| Kpna2   | 37.1 | 40.8 | 49.4 | 30.2 | 47.0 | 27.3 | 54.4 | 36.3 | 43.0 | 37.1 | 48.1 | 34.9 |
| Kpna3   | 10.6 | 10.9 | 11.1 | 12.7 | 12.8 | 11.4 | 11.5 | 10.2 | 10.0 | 11.0 | 12.8 | 12.2 |
| Kpna4   | 34.3 | 34.4 | 31.0 | 41.9 | 36.2 | 36.3 | 35.1 | 29.1 | 31.6 | 30.8 | 40.7 | 36.6 |
| Kpna6   | 20.8 | 18.0 | 16.3 | 24.7 | 18.3 | 22.0 | 18.5 | 17.1 | 16.7 | 18.8 | 19.2 | 17.5 |
| Kpna7   | 0.0  | 0.0  | 0.0  | 0.0  | 0.0  | 0.0  | 0.0  | 0.0  | 0.0  | 0.0  | 0.0  | 0.0  |
| Kpnb1   | 54.3 | 48.6 | 48.4 | 50.5 | 53.9 | 47.5 | 63.2 | 58.0 | 59.3 | 51.4 | 62.2 | 52.1 |
| Kptn    | 3.4  | 2.9  | 3.3  | 2.8  | 2.4  | 2.3  | 3.8  | 4.6  | 4.1  | 3.7  | 3.4  | 3.4  |
| Kras    | 6.1  | 6.1  | 6.6  | 9.1  | 7.4  | 8.6  | 9.7  | 8.1  | 8.2  | 6.5  | 9.7  | 9.1  |
| Krba1   | 1.5  | 1.2  | 1.2  | 1.0  | 1.0  | 1.4  | 1.2  | 1.2  | 1.2  | 1.6  | 1.2  | 1.1  |
| Krcc1   | 70.8 | 57.4 | 62.6 | 82.7 | 49.5 | 74.6 | 64.5 | 54.7 | 45.1 | 46.7 | 80.0 | 72.1 |
| Kremen1 | 7.7  | 8.8  | 8.6  | 7.9  | 9.1  | 7.9  | 8.8  | 8.9  | 10.0 | 8.4  | 8.2  | 8.7  |
| Kri1    | 9.5  | 8.2  | 10.3 | 11.3 | 10.1 | 10.4 | 11.6 | 10.6 | 9.6  | 8.1  | 10.8 | 10.4 |
| Krit1   | 10.2 | 11.9 | 11.6 | 10.3 | 9.3  | 10.4 | 9.5  | 9.6  | 11.0 | 10.2 | 11.5 | 11.4 |
| Krr1    | 5.2  | 5.0  | 4.2  | 5.9  | 5.2  | 6.3  | 4.6  | 4.5  | 4.1  | 4.8  | 5.3  | 5.7  |
| Krt10   | 0.2  | 0.4  | 0.3  | 0.4  | 0.3  | 0.3  | 0.3  | 0.4  | 0.3  | 0.1  | 0.3  | 0.3  |
| Krt14   | 0.0  | 0.0  | 0.0  | 0.0  | 0.0  | 0.0  | 0.0  | 0.2  | 0.1  | 1.6  | 1.1  | 0.1  |
| Krt17   | 0.0  | 0.0  | 0.0  | 0.0  | 0.0  | 0.0  | 0.0  | 0.0  | 0.0  | 0.1  | 0.0  | 0.0  |
| Krt18   | 0.4  | 0.0  | 0.0  | 0.0  | 0.0  | 0.2  | 0.0  | 0.5  | 0.2  | 3.0  | 0.5  | 1.0  |
| Krt19   | 0.6  | 0.1  | 0.2  | 0.1  | 0.0  | 0.1  | 0.2  | 0.1  | 0.2  | 0.9  | 0.5  | 0.2  |
| Krt20   | 0.0  | 0.0  | 0.0  | 0.1  | 0.0  | 0.1  | 0.1  | 0.0  | 0.1  | 0.0  | 0.0  | 0.0  |
| Krt222  | 0.1  | 0.1  | 0.1  | 0.0  | 0.1  | 0.1  | 0.1  | 0.1  | 0.1  | 0.0  | 0.1  | 0.0  |

Online Table 1

|          |       |       |       |       |       |       |       |       |       |       |       |       |
|----------|-------|-------|-------|-------|-------|-------|-------|-------|-------|-------|-------|-------|
| Krt23    | 0.0   | 0.0   | 0.0   | 0.0   | 0.0   | 0.0   | 0.0   | 0.0   | 0.0   | 0.0   | 0.0   | 0.0   |
| Krt24    | 0.2   | 0.0   | 0.0   | 0.3   | 0.1   | 0.1   | 0.1   | 0.0   | 0.0   | 0.0   | 0.0   | 0.0   |
| Krt5     | 0.0   | 0.0   | 0.0   | 0.0   | 0.0   | 0.0   | 0.0   | 0.0   | 0.0   | 0.0   | 0.0   | 0.0   |
| Krt7     | 0.2   | 0.2   | 0.3   | 0.2   | 0.3   | 0.2   | 0.2   | 0.5   | 0.2   | 4.2   | 1.9   | 0.6   |
| Krt78    | 0.0   | 0.0   | 0.0   | 0.0   | 0.0   | 0.0   | 0.0   | 0.0   | 0.0   | 0.0   | 0.0   | 0.1   |
| Krt8     | 0.0   | 0.0   | 0.0   | 0.0   | 0.0   | 0.0   | 0.0   | 0.4   | 0.2   | 1.7   | 0.8   | 0.6   |
| Krt80    | 0.7   | 0.1   | 0.0   | 0.8   | 0.3   | 0.3   | 0.1   | 0.2   | 0.1   | 0.1   | 0.1   | 0.1   |
| Krtcap2  | 130.9 | 122.7 | 113.2 | 139.4 | 113.2 | 150.1 | 128.5 | 151.8 | 142.4 | 113.9 | 122.8 | 121.6 |
| Krtcap3  | 0.1   | 0.1   | 0.2   | 0.5   | 0.3   | 0.1   | 0.9   | 0.3   | 0.2   | 0.2   | 0.4   | 0.5   |
| Ksr1     | 2.8   | 4.6   | 5.4   | 3.5   | 4.4   | 3.2   | 3.4   | 3.7   | 3.1   | 2.7   | 2.8   | 2.7   |
| Ksr2     | 0.0   | 0.0   | 0.0   | 0.0   | 0.0   | 0.0   | 0.0   | 0.0   | 0.0   | 0.0   | 0.0   | 0.0   |
| Kti12    | 5.9   | 6.8   | 5.2   | 6.6   | 7.3   | 5.7   | 5.9   | 6.0   | 6.0   | 8.6   | 6.3   | 6.0   |
| Ktn1     | 29.3  | 25.7  | 25.3  | 29.2  | 23.1  | 30.6  | 24.5  | 21.2  | 21.7  | 25.2  | 28.4  | 26.4  |
| Kxd1     | 18.8  | 18.6  | 16.0  | 18.2  | 14.7  | 21.0  | 16.4  | 16.9  | 15.7  | 16.9  | 17.2  | 18.8  |
| Kynu     | 0.0   | 0.1   | 0.0   | 0.0   | 0.0   | 0.0   | 0.0   | 0.0   | 0.0   | 0.0   | 0.0   | 0.0   |
| L1cam    | 0.4   | 0.1   | 0.1   | 2.0   | 4.0   | 0.3   | 0.9   | 0.2   | 0.2   | 0.3   | 0.3   | 0.3   |
| L2hgdh   | 2.9   | 3.6   | 3.7   | 2.1   | 3.0   | 2.5   | 3.2   | 3.0   | 3.5   | 3.8   | 3.7   | 3.1   |
| L3hypedh | 7.3   | 8.1   | 6.9   | 6.6   | 6.6   | 7.8   | 7.1   | 6.6   | 5.1   | 10.0  | 8.3   | 7.9   |
| L3mbtl1  | 0.0   | 0.0   | 0.0   | 0.0   | 0.0   | 0.0   | 0.0   | 0.0   | 0.0   | 0.0   | 0.0   | 0.0   |
| L3mbtl2  | 2.8   | 3.0   | 2.9   | 3.3   | 3.6   | 3.7   | 3.3   | 3.2   | 3.3   | 2.9   | 2.8   | 2.6   |
| L3mbtl3  | 8.5   | 8.4   | 7.8   | 7.4   | 6.7   | 6.0   | 5.3   | 5.9   | 5.8   | 7.5   | 6.7   | 7.1   |
| I7Rn6    | 20.0  | 21.8  | 18.1  | 21.9  | 18.5  | 20.4  | 18.1  | 15.7  | 20.3  | 21.2  | 21.4  | 20.0  |
| Lacc1    | 5.0   | 4.1   | 3.7   | 5.8   | 8.1   | 5.0   | 4.2   | 3.3   | 3.3   | 4.7   | 3.9   | 4.4   |
| Lace1    | 5.2   | 4.3   | 4.0   | 4.5   | 3.9   | 5.0   | 3.9   | 3.7   | 3.9   | 4.3   | 3.7   | 4.2   |
| Lactb    | 4.5   | 4.0   | 5.8   | 5.9   | 7.4   | 4.8   | 4.6   | 4.7   | 5.7   | 5.7   | 5.6   | 6.1   |
| Lactb2   | 16.3  | 18.0  | 16.2  | 21.0  | 15.7  | 22.5  | 17.3  | 17.4  | 14.5  | 12.8  | 19.7  | 17.0  |
| Lag3     | 0.1   | 0.1   | 0.2   | 0.0   | 0.1   | 0.0   | 0.1   | 0.1   | 0.1   | 0.0   | 0.1   | 0.1   |
| Lage3    | 28.7  | 25.8  | 21.4  | 30.5  | 20.6  | 29.0  | 22.3  | 23.1  | 21.2  | 22.6  | 19.7  | 18.5  |
| Lair1    | 0.4   | 0.0   | 0.0   | 5.0   | 7.0   | 0.0   | 1.2   | 0.2   | 0.1   | 0.6   | 0.2   | 0.4   |
| Lama1    | 0.6   | 0.5   | 0.7   | 0.4   | 1.7   | 0.3   | 1.9   | 1.7   | 2.2   | 2.5   | 1.6   | 1.7   |
| Lama2    | 32.0  | 33.4  | 32.5  | 27.4  | 25.3  | 30.2  | 22.7  | 40.4  | 24.7  | 8.8   | 16.0  | 12.4  |
| Lama3    | 0.0   | 0.0   | 0.0   | 0.0   | 0.1   | 0.1   | 0.0   | 0.0   | 0.0   | 0.0   | 0.0   | 0.0   |
| Lama4    | 62.4  | 93.0  | 136.9 | 33.7  | 93.3  | 46.3  | 96.1  | 131.0 | 103.0 | 66.4  | 75.9  | 85.7  |
| Lama5    | 0.5   | 0.5   | 0.6   | 0.1   | 0.3   | 0.2   | 0.3   | 1.0   | 1.3   | 2.6   | 1.2   | 1.1   |
| Lamb1    | 55.4  | 47.4  | 60.6  | 56.5  | 93.9  | 66.6  | 97.9  | 66.7  | 76.9  | 88.1  | 76.1  | 63.4  |
| Lamb2    | 69.9  | 83.3  | 98.9  | 49.6  | 59.9  | 55.0  | 72.7  | 104.7 | 101.8 | 48.3  | 55.0  | 62.8  |
| Lamb3    | 1.1   | 0.8   | 0.8   | 0.6   | 0.8   | 0.7   | 0.9   | 1.1   | 0.8   | 0.3   | 0.3   | 0.3   |
| Lamc1    | 91.0  | 104.0 | 135.4 | 60.5  | 88.9  | 65.4  | 91.5  | 155.8 | 106.8 | 61.8  | 79.7  | 77.9  |
| Lamc2    | 3.0   | 2.7   | 2.4   | 2.5   | 2.1   | 1.3   | 2.9   | 4.1   | 2.7   | 1.8   | 3.5   | 2.4   |
| Lamc3    | 0.0   | 0.0   | 0.1   | 0.0   | 0.0   | 0.0   | 0.0   | 0.1   | 0.0   | 0.1   | 0.1   | 0.1   |
| Lamp1    | 503.8 | 420.8 | 405.3 | 563.0 | 484.9 | 538.0 | 386.4 | 413.2 | 378.1 | 389.2 | 427.7 | 474.2 |
| Lamp2    | 170.2 | 164.0 | 172.2 | 205.3 | 192.8 | 199.9 | 125.5 | 175.4 | 145.7 | 164.1 | 157.1 | 183.2 |
| Lamp3    | 0.0   | 0.0   | 0.0   | 0.0   | 0.0   | 0.0   | 0.0   | 0.0   | 0.0   | 0.0   | 0.0   | 0.0   |
| Lamtor1  | 58.2  | 51.7  | 45.1  | 63.8  | 56.8  | 56.3  | 54.5  | 56.0  | 51.8  | 57.1  | 53.0  | 56.5  |
| Lamtor2  | 55.0  | 49.1  | 48.0  | 63.5  | 57.1  | 67.7  | 50.9  | 52.4  | 51.2  | 53.9  | 50.2  | 54.7  |
| Lamtor3  | 37.3  | 37.9  | 35.0  | 42.1  | 33.2  | 40.9  | 32.8  | 29.0  | 32.8  | 34.9  | 35.8  | 38.6  |
| Lamtor4  | 25.4  | 20.6  | 19.2  | 23.7  | 24.0  | 23.8  | 17.6  | 25.5  | 21.2  | 26.2  | 18.8  | 19.8  |
| Lamtor5  | 39.5  | 38.7  | 35.8  | 41.9  | 38.8  | 43.4  | 36.0  | 35.2  | 40.9  | 46.9  | 39.7  | 40.7  |
| Lancl1   | 8.2   | 8.0   | 6.3   | 7.1   | 5.8   | 8.0   | 5.7   | 5.2   | 6.3   | 7.2   | 5.4   | 5.9   |
| Lancl2   | 2.5   | 2.8   | 2.8   | 2.3   | 2.3   | 2.2   | 2.4   | 2.8   | 2.6   | 2.3   | 2.4   | 1.9   |
| Lancl3   | 0.3   | 0.1   | 0.1   | 0.6   | 0.2   | 0.5   | 0.1   | 0.0   | 0.1   | 0.1   | 0.0   | 0.1   |
| Lap3     | 28.7  | 25.1  | 23.0  | 27.4  | 22.3  | 25.8  | 25.9  | 24.4  | 25.4  | 28.3  | 30.6  | 27.1  |
| Laptm4a  | 249.4 | 218.9 | 203.7 | 246.8 | 228.3 | 228.8 | 210.2 | 233.1 | 242.5 | 385.1 | 296.7 | 297.9 |
| Laptm4b  | 21.6  | 21.0  | 20.4  | 17.8  | 20.8  | 20.0  | 15.7  | 20.2  | 17.4  | 25.0  | 17.0  | 20.6  |
| Laptm5   | 3.1   | 0.2   | 0.2   | 28.9  | 52.6  | 0.1   | 5.3   | 0.7   | 0.8   | 2.6   | 0.7   | 1.9   |
| Large    | 26.7  | 24.6  | 21.8  | 24.5  | 22.4  | 25.6  | 27.6  | 20.0  | 32.2  | 24.7  | 25.6  | 30.6  |
| Larp1    | 14.8  | 16.3  | 15.6  | 16.3  | 14.2  | 14.7  | 18.3  | 15.1  | 15.1  | 13.1  | 16.4  | 14.7  |

Online Table 1



|         |       |       |       |       |       |       |       |       |       |       |       |       |
|---------|-------|-------|-------|-------|-------|-------|-------|-------|-------|-------|-------|-------|
| Larp1b  | 8.0   | 7.1   | 7.4   | 7.5   | 6.3   | 5.9   | 7.0   | 4.9   | 7.3   | 6.7   | 10.6  | 9.9   |
| Larp4   | 9.9   | 11.7  | 13.1  | 10.5  | 11.6  | 9.9   | 11.9  | 12.7  | 11.5  | 12.7  | 15.8  | 15.4  |
| Larp4b  | 17.8  | 17.3  | 16.7  | 17.0  | 17.1  | 17.0  | 16.3  | 14.7  | 15.4  | 15.4  | 17.2  | 16.7  |
| Larp6   | 3.0   | 3.9   | 4.3   | 3.0   | 2.6   | 3.2   | 2.8   | 2.9   | 2.5   | 2.5   | 2.1   | 2.6   |
| Larp7   | 11.6  | 10.3  | 14.4  | 11.8  | 12.4  | 7.9   | 14.9  | 11.4  | 10.5  | 11.2  | 14.3  | 12.7  |
| Lars    | 48.6  | 34.3  | 27.6  | 46.1  | 33.0  | 41.4  | 35.7  | 37.6  | 33.5  | 32.4  | 40.0  | 31.1  |
| Lars2   | 0.5   | 0.6   | 0.6   | 0.8   | 0.8   | 0.6   | 0.5   | 0.8   | 0.7   | 0.7   | 0.7   | 0.5   |
| Las1l   | 15.6  | 12.6  | 13.4  | 19.0  | 13.8  | 16.0  | 15.8  | 11.5  | 10.4  | 14.5  | 14.9  | 16.1  |
| Lasp1   | 49.6  | 54.3  | 46.8  | 57.3  | 65.3  | 48.2  | 70.9  | 65.9  | 64.4  | 43.6  | 57.6  | 45.9  |
| Lat     | 0.0   | 0.1   | 0.0   | 0.0   | 0.1   | 0.1   | 0.0   | 0.1   | 0.1   | 0.1   | 0.0   | 0.0   |
| Lat2    | 1.4   | 0.5   | 0.4   | 15.0  | 23.0  | 0.6   | 3.2   | 0.6   | 0.8   | 1.6   | 0.8   | 1.5   |
| Lats1   | 9.5   | 9.8   | 10.1  | 10.7  | 9.0   | 10.0  | 10.3  | 10.6  | 9.7   | 9.3   | 11.2  | 9.9   |
| Lats2   | 48.2  | 42.8  | 34.7  | 54.4  | 34.2  | 49.2  | 42.6  | 30.3  | 33.8  | 45.3  | 44.8  | 34.7  |
| Lax1    | 0.0   | 0.0   | 0.0   | 0.0   | 0.0   | 0.0   | 0.0   | 0.0   | 0.1   | 0.0   | 0.0   | 0.0   |
| Layn    | 37.0  | 35.6  | 37.5  | 56.9  | 45.5  | 50.6  | 41.5  | 33.0  | 29.8  | 29.1  | 32.2  | 34.7  |
| Lbh     | 113.0 | 120.2 | 97.2  | 112.7 | 95.5  | 118.2 | 124.0 | 106.6 | 167.2 | 95.2  | 113.6 | 125.9 |
| Lbp     | 5.6   | 5.3   | 15.2  | 4.0   | 10.1  | 2.1   | 6.8   | 11.2  | 5.7   | 4.3   | 3.7   | 6.1   |
| Lbr     | 6.1   | 6.3   | 7.1   | 4.3   | 6.6   | 4.3   | 9.2   | 7.2   | 7.4   | 5.6   | 8.2   | 5.5   |
| Lbx1    | 0.2   | 0.1   | 0.0   | 0.2   | 0.1   | 0.2   | 0.0   | 0.0   | 0.0   | 0.0   | 0.0   | 0.0   |
| Lbx2    | 0.4   | 0.1   | 0.2   | 0.3   | 0.2   | 1.1   | 0.1   | 0.1   | 0.1   | 0.2   | 0.1   | 0.1   |
| Lca5    | 1.8   | 2.0   | 3.3   | 1.5   | 2.4   | 1.8   | 2.9   | 2.5   | 1.9   | 1.2   | 2.2   | 2.1   |
| Lca5l   | 0.2   | 0.2   | 0.4   | 0.2   | 0.3   | 0.2   | 0.2   | 0.3   | 0.3   | 0.3   | 0.4   | 0.3   |
| Lcat    | 1.7   | 1.4   | 1.6   | 0.9   | 1.3   | 1.2   | 1.5   | 0.9   | 0.9   | 1.4   | 0.8   | 1.2   |
| Lce1g   | 0.3   | 0.0   | 0.0   | 0.8   | 0.1   | 0.7   | 0.0   | 0.0   | 0.0   | 0.0   | 0.0   | 0.1   |
| Lce1m   | 0.0   | 0.0   | 0.0   | 0.0   | 0.0   | 0.0   | 0.0   | 0.0   | 0.0   | 0.0   | 0.0   | 0.0   |
| Lck     | 0.0   | 0.0   | 0.0   | 0.0   | 0.0   | 0.0   | 0.0   | 0.0   | 0.0   | 0.0   | 0.1   | 0.0   |
| Lclat1  | 16.8  | 20.2  | 19.2  | 17.8  | 16.7  | 17.2  | 26.4  | 18.2  | 31.6  | 16.4  | 23.7  | 24.8  |
| Lcmt1   | 18.6  | 14.9  | 14.3  | 16.4  | 12.8  | 19.2  | 13.4  | 13.1  | 12.3  | 13.5  | 14.7  | 12.8  |
| Lcmt2   | 1.9   | 2.3   | 1.7   | 1.5   | 2.1   | 2.5   | 1.6   | 2.2   | 2.2   | 2.7   | 1.9   | 2.1   |
| Lcn2    | 6.3   | 3.1   | 8.4   | 4.7   | 2.1   | 1.5   | 1.2   | 2.0   | 0.6   | 0.5   | 0.5   | 0.9   |
| Lcor    | 0.6   | 0.8   | 0.7   | 0.9   | 0.7   | 0.7   | 0.8   | 0.7   | 0.5   | 0.6   | 0.7   | 0.8   |
| Lcorl   | 1.2   | 1.3   | 1.6   | 1.3   | 1.3   | 1.0   | 1.1   | 0.7   | 1.2   | 1.1   | 1.3   | 1.3   |
| Lcp1    | 9.8   | 0.5   | 1.0   | 64.3  | 119.4 | 0.6   | 16.6  | 1.9   | 2.8   | 8.9   | 3.3   | 8.0   |
| Lcp2    | 0.5   | 0.1   | 0.1   | 2.4   | 3.9   | 0.0   | 0.9   | 0.3   | 0.2   | 0.3   | 0.3   | 0.2   |
| Lct     | 0.0   | 0.0   | 0.0   | 0.0   | 0.0   | 0.0   | 0.0   | 0.0   | 0.0   | 0.0   | 0.0   | 0.0   |
| Lctl    | 0.1   | 0.0   | 0.0   | 0.0   | 0.0   | 0.1   | 0.0   | 0.0   | 0.0   | 0.1   | 0.1   | 0.0   |
| Ldb1    | 21.4  | 20.9  | 22.2  | 25.4  | 20.8  | 23.0  | 24.9  | 22.2  | 23.8  | 22.0  | 21.5  | 20.6  |
| Ldb2    | 0.0   | 0.0   | 0.0   | 0.0   | 0.0   | 0.0   | 0.0   | 0.2   | 0.1   | 0.5   | 0.5   | 0.2   |
| Ldb3    | 1.4   | 1.0   | 0.7   | 1.5   | 1.2   | 1.1   | 1.8   | 1.1   | 1.5   | 1.0   | 1.8   | 1.3   |
| Ldha    | 229.5 | 227.4 | 185.8 | 216.9 | 258.0 | 207.0 | 240.4 | 189.8 | 229.4 | 232.7 | 204.1 | 222.2 |
| Ldhal6b | 0.2   | 0.1   | 0.2   | 0.1   | 0.0   | 0.1   | 0.1   | 0.1   | 0.1   | 0.0   | 0.3   | 0.1   |
| Ldhb    | 18.2  | 24.4  | 28.7  | 15.1  | 16.2  | 22.7  | 17.0  | 16.8  | 14.1  | 79.6  | 30.3  | 31.6  |
| Ldhd    | 0.4   | 0.3   | 0.4   | 0.2   | 0.1   | 0.2   | 0.1   | 0.4   | 0.2   | 1.1   | 0.3   | 0.2   |
| Ldlr    | 36.0  | 54.1  | 47.6  | 19.2  | 37.0  | 23.8  | 89.9  | 79.4  | 82.9  | 21.4  | 57.1  | 30.1  |
| Ldlrad1 | 0.0   | 0.0   | 0.0   | 0.0   | 0.0   | 0.1   | 0.0   | 0.0   | 0.0   | 0.0   | 0.1   | 0.0   |
| Ldlrad2 | 0.1   | 0.0   | 0.0   | 0.0   | 0.0   | 0.1   | 0.1   | 0.1   | 0.1   | 0.0   | 0.1   | 0.0   |
| Ldlrad3 | 1.8   | 1.7   | 2.3   | 2.1   | 1.7   | 2.0   | 1.9   | 2.5   | 2.0   | 1.9   | 2.1   | 2.0   |
| Ldlrad4 | 19.7  | 19.3  | 20.8  | 23.6  | 24.4  | 21.5  | 30.4  | 24.1  | 23.6  | 19.7  | 23.8  | 25.5  |
| Ldlrap1 | 10.8  | 11.4  | 8.9   | 12.3  | 12.4  | 11.6  | 10.2  | 8.8   | 10.4  | 9.8   | 9.1   | 7.9   |
| Ldoc1l  | 2.8   | 2.2   | 2.2   | 2.4   | 2.0   | 3.5   | 2.3   | 2.3   | 2.3   | 2.5   | 2.4   | 2.5   |
| Leap2   | 0.0   | 0.3   | 0.0   | 0.0   | 0.2   | 0.0   | 0.0   | 0.0   | 0.1   | 0.3   | 0.8   | 0.1   |
| Lef1    | 0.1   | 0.0   | 0.0   | 0.0   | 0.0   | 0.0   | 0.0   | 0.0   | 0.0   | 0.0   | 0.1   | 0.0   |
| Lefty1  | 6.5   | 6.2   | 4.4   | 5.9   | 4.1   | 6.5   | 4.8   | 4.9   | 5.0   | 5.6   | 5.2   | 5.4   |
| Lefty2  | 0.1   | 0.1   | 0.1   | 0.0   | 0.0   | 0.1   | 0.1   | 0.0   | 0.0   | 0.1   | 0.0   | 0.1   |
| Lekr1   | 0.9   | 0.9   | 0.8   | 1.0   | 0.8   | 1.2   | 0.7   | 0.6   | 0.4   | 0.9   | 0.6   | 0.9   |
| Lemd1   | 0.3   | 0.0   | 0.1   | 0.0   | 0.1   | 0.0   | 0.1   | 0.1   | 0.0   | 0.1   | 0.1   | 0.0   |
| Lemd2   | 12.1  | 11.5  | 10.5  | 12.5  | 11.0  | 13.5  | 12.3  | 11.0  | 12.6  | 13.8  | 11.9  | 12.3  |

Online Table 1

|          |        |       |       |        |       |        |        |       |       |       |        |       |
|----------|--------|-------|-------|--------|-------|--------|--------|-------|-------|-------|--------|-------|
| Lemd3    | 2.9    | 3.7   | 3.2   | 2.9    | 3.5   | 3.2    | 3.6    | 3.7   | 3.4   | 3.5   | 3.7    | 3.8   |
| Lenep    | 1.2    | 0.9   | 1.2   | 0.8    | 1.0   | 1.6    | 1.3    | 1.2   | 0.7   | 0.6   | 0.3    | 1.0   |
| Leng1    | 9.3    | 9.9   | 9.8   | 11.9   | 8.1   | 9.7    | 10.6   | 8.8   | 9.5   | 7.9   | 10.2   | 10.8  |
| Leng8    | 5.1    | 6.4   | 6.1   | 5.3    | 5.3   | 5.0    | 6.5    | 5.1   | 7.2   | 4.8   | 4.4    | 4.1   |
| Leng9    | 2.4    | 2.3   | 3.0   | 2.1    | 2.7   | 2.3    | 2.2    | 2.7   | 2.4   | 3.0   | 3.6    | 3.0   |
| Leo1     | 16.2   | 18.3  | 17.4  | 17.4   | 15.7  | 15.6   | 17.7   | 14.9  | 14.5  | 13.2  | 15.7   | 16.7  |
| Lep      | 0.0    | 0.0   | 0.0   | 0.1    | 0.0   | 0.0    | 0.0    | 0.0   | 0.0   | 0.0   | 0.0    | 0.0   |
| Lepr     | 0.1    | 0.1   | 0.1   | 0.1    | 0.1   | 0.1    | 0.1    | 0.1   | 0.1   | 0.1   | 0.1    | 0.0   |
| Lepre1   | 51.3   | 42.9  | 42.4  | 58.3   | 47.1  | 49.5   | 55.9   | 61.6  | 49.5  | 47.8  | 54.1   | 42.5  |
| Leprel1  | 0.6    | 0.6   | 0.9   | 0.3    | 0.4   | 0.2    | 0.5    | 0.2   | 0.2   | 0.2   | 0.4    | 0.2   |
| Leprel2  | 39.0   | 35.0  | 42.0  | 35.1   | 38.8  | 46.0   | 47.5   | 41.0  | 45.5  | 36.4  | 34.7   | 40.7  |
| Leprel4  | 71.7   | 57.8  | 52.1  | 45.2   | 47.9  | 49.2   | 65.8   | 75.6  | 70.0  | 90.4  | 77.4   | 73.5  |
| Leprot   | 66.0   | 58.6  | 53.4  | 71.8   | 65.9  | 62.0   | 68.9   | 58.1  | 69.1  | 59.2  | 64.0   | 66.5  |
| Leprotl1 | 18.3   | 16.5  | 13.0  | 25.1   | 16.9  | 20.5   | 16.6   | 15.0  | 18.2  | 19.0  | 20.3   | 18.5  |
| Letm1    | 9.1    | 7.5   | 8.7   | 8.3    | 8.2   | 6.9    | 9.0    | 9.7   | 8.2   | 7.5   | 8.8    | 8.2   |
| Letm2    | 1.2    | 1.3   | 1.3   | 1.7    | 0.9   | 1.6    | 1.0    | 1.3   | 1.0   | 0.8   | 1.4    | 1.0   |
| Letmd1   | 6.6    | 5.6   | 4.8   | 7.4    | 6.1   | 6.2    | 6.1    | 6.7   | 6.0   | 5.9   | 6.4    | 6.0   |
| Lfng     | 0.4    | 0.2   | 0.3   | 1.9    | 3.1   | 0.1    | 0.8    | 1.5   | 1.3   | 3.4   | 1.8    | 1.3   |
| Lgals1   | 1073.2 | 817.0 | 740.4 | 1211.2 | 994.6 | 1106.1 | 1112.4 | 997.8 | 941.4 | 936.3 | 1081.2 | 919.1 |
| Lgals2   | 1.2    | 0.7   | 0.1   | 0.1    | 0.6   | 0.4    | 0.7    | 0.6   | 1.1   | 0.9   | 0.9    | 0.6   |
| Lgals3   | 32.5   | 7.3   | 5.1   | 185.7  | 189.8 | 22.6   | 16.1   | 9.8   | 5.9   | 24.1  | 16.6   | 14.4  |
| Lgals3bp | 81.5   | 60.5  | 72.2  | 132.4  | 87.5  | 84.8   | 45.4   | 35.8  | 30.3  | 33.1  | 23.6   | 41.7  |
| Lgals4   | 0.2    | 0.1   | 0.2   | 0.1    | 0.1   | 0.3    | 0.3    | 0.1   | 0.4   | 0.1   | 0.1    | 0.0   |
| Lgals6   | 0.1    | 0.4   | 0.1   | 0.0    | 0.2   | 0.1    | 0.0    | 0.0   | 0.0   | 0.4   | 0.0    | 0.4   |
| Lgals7   | 0.0    | 0.0   | 0.0   | 0.0    | 0.1   | 0.0    | 0.0    | 0.0   | 0.2   | 0.1   | 0.0    | 0.1   |
| Lgals8   | 22.1   | 19.1  | 18.7  | 28.8   | 19.5  | 24.9   | 17.1   | 17.9  | 16.0  | 19.3  | 18.4   | 19.4  |
| Lgals9   | 49.7   | 39.2  | 30.5  | 64.9   | 43.5  | 42.2   | 37.1   | 26.8  | 23.2  | 24.2  | 28.7   | 23.2  |
| Lgalsl   | 6.1    | 6.6   | 7.6   | 6.7    | 4.9   | 7.5    | 5.1    | 6.5   | 6.5   | 5.8   | 6.6    | 6.8   |
| Lgi2     | 3.0    | 5.5   | 14.5  | 2.4    | 3.4   | 3.4    | 3.8    | 16.0  | 7.3   | 5.2   | 2.9    | 7.7   |
| Lgi3     | 0.1    | 0.1   | 0.1   | 0.0    | 0.1   | 0.0    | 0.1    | 0.2   | 0.1   | 0.2   | 0.1    | 0.2   |
| Lgi4     | 0.8    | 1.1   | 1.6   | 0.3    | 0.6   | 0.3    | 0.8    | 1.1   | 0.5   | 0.4   | 0.5    | 0.7   |
| Lgmn     | 51.0   | 51.9  | 68.1  | 58.6   | 70.9  | 50.0   | 53.8   | 78.5  | 60.6  | 68.6  | 64.5   | 67.5  |
| Lgr4     | 3.7    | 4.2   | 4.0   | 2.8    | 3.7   | 4.0    | 4.6    | 10.1  | 7.3   | 4.0   | 5.9    | 4.6   |
| Lgr5     | 0.0    | 0.0   | 0.0   | 0.0    | 0.0   | 0.0    | 0.0    | 0.0   | 0.0   | 0.0   | 0.0    | 0.0   |
| Lgr6     | 0.0    | 0.0   | 0.0   | 0.1    | 0.1   | 0.1    | 0.1    | 0.0   | 0.0   | 0.0   | 0.0    | 0.0   |
| Lhfp     | 273.8  | 240.2 | 235.2 | 314.5  | 218.3 | 256.6  | 265.5  | 178.1 | 249.5 | 227.3 | 251.2  | 280.4 |
| Lhfpl1   | 0.1    | 0.9   | 0.3   | 0.1    | 0.1   | 0.2    | 0.0    | 0.1   | 0.1   | 0.1   | 0.3    | 0.2   |
| Lhfpl2   | 10.1   | 9.2   | 13.5  | 14.5   | 24.2  | 9.1    | 15.5   | 12.6  | 13.4  | 20.6  | 16.8   | 18.1  |
| Lhfpl3   | 0.3    | 0.1   | 0.1   | 0.1    | 0.0   | 0.2    | 0.1    | 0.0   | 0.0   | 0.1   | 0.0    | 0.0   |
| Lhfpl4   | 0.3    | 0.4   | 0.3   | 0.5    | 0.3   | 0.7    | 0.6    | 0.4   | 0.3   | 0.1   | 0.2    | 0.2   |
| Lhpp     | 5.9    | 5.5   | 4.8   | 6.8    | 6.0   | 6.1    | 5.0    | 4.9   | 3.9   | 5.9   | 5.4    | 4.5   |
| Lhx2     | 0.2    | 0.1   | 0.1   | 0.1    | 0.1   | 0.1    | 0.0    | 0.0   | 0.1   | 0.0   | 0.0    | 0.0   |
| Lhx4     | 0.0    | 0.0   | 0.0   | 0.0    | 0.0   | 0.0    | 0.0    | 0.0   | 0.0   | 0.0   | 0.1    | 0.0   |
| Lhx5     | 0.0    | 0.0   | 0.0   | 0.0    | 0.0   | 0.0    | 0.0    | 0.0   | 0.0   | 0.0   | 0.0    | 0.0   |
| Lhx6     | 0.3    | 0.0   | 0.1   | 0.3    | 0.0   | 0.2    | 0.2    | 0.2   | 0.2   | 0.3   | 0.4    | 0.1   |
| Lhx8     | 0.0    | 0.0   | 0.0   | 0.0    | 0.0   | 0.0    | 0.0    | 0.1   | 0.0   | 0.0   | 0.1    | 0.0   |
| Lhx9     | 0.3    | 0.1   | 0.1   | 0.2    | 0.1   | 0.3    | 0.2    | 0.2   | 0.2   | 0.2   | 0.2    | 0.0   |
| Lias     | 13.4   | 14.0  | 11.7  | 14.9   | 11.5  | 14.2   | 10.6   | 12.7  | 11.1  | 12.2  | 12.0   | 13.6  |
| Lif      | 8.1    | 6.7   | 5.5   | 7.4    | 9.0   | 6.7    | 9.4    | 4.7   | 6.5   | 11.0  | 6.7    | 6.7   |
| Lifr     | 6.2    | 7.9   | 10.5  | 6.1    | 10.1  | 5.0    | 10.7   | 10.1  | 8.0   | 9.8   | 7.8    | 9.7   |
| Lig1     | 2.4    | 3.9   | 5.4   | 1.8    | 5.0   | 1.7    | 6.1    | 3.9   | 4.0   | 2.5   | 3.7    | 2.8   |
| Lig3     | 6.0    | 6.2   | 5.5   | 5.4    | 5.1   | 5.1    | 4.9    | 5.7   | 5.0   | 5.2   | 5.7    | 4.6   |
| Lig4     | 2.3    | 2.2   | 2.4   | 2.0    | 2.1   | 2.2    | 1.8    | 2.3   | 2.1   | 2.1   | 2.5    | 3.0   |
| Lilra5   | 0.0    | 0.0   | 0.0   | 0.0    | 0.0   | 0.0    | 0.0    | 0.0   | 0.0   | 0.1   | 0.0    | 0.0   |
| Lilra6   | 0.1    | 0.0   | 0.0   | 0.9    | 1.4   | 0.0    | 0.2    | 0.0   | 0.0   | 0.1   | 0.0    | 0.0   |
| Lilrb3   | 1.3    | 0.0   | 0.1   | 11.0   | 16.0  | 0.0    | 2.0    | 0.2   | 0.2   | 1.2   | 0.2    | 0.9   |
| Lilrb4   | 10.6   | 0.0   | 0.8   | 90.8   | 119.0 | 0.1    | 11.2   | 1.5   | 1.7   | 7.9   | 2.5    | 6.2   |

Online Table 1

|        |       |       |       |       |       |       |       |       |       |       |       |       |
|--------|-------|-------|-------|-------|-------|-------|-------|-------|-------|-------|-------|-------|
| Lima1  | 33.2  | 36.7  | 43.9  | 27.2  | 35.2  | 23.2  | 39.0  | 37.1  | 34.9  | 56.1  | 55.2  | 50.0  |
| Limch1 | 14.7  | 17.8  | 24.1  | 17.7  | 14.9  | 9.6   | 20.6  | 27.2  | 20.3  | 11.3  | 22.0  | 15.3  |
| Limd1  | 12.5  | 14.1  | 12.0  | 11.5  | 12.8  | 11.3  | 12.1  | 13.7  | 14.5  | 14.4  | 11.4  | 12.8  |
| Limd2  | 5.8   | 6.4   | 6.1   | 8.5   | 11.4  | 6.3   | 7.2   | 6.4   | 7.0   | 6.6   | 6.4   | 5.0   |
| Lime1  | 3.0   | 3.1   | 2.6   | 2.8   | 2.9   | 3.3   | 3.6   | 2.6   | 4.2   | 2.6   | 3.3   | 2.3   |
| Limk1  | 5.4   | 6.7   | 5.5   | 6.2   | 6.3   | 5.1   | 7.5   | 6.0   | 5.1   | 4.4   | 6.3   | 4.8   |
| Limk2  | 12.1  | 11.5  | 9.3   | 9.9   | 9.0   | 10.7  | 10.2  | 7.9   | 10.6  | 11.6  | 11.1  | 10.3  |
| Lims1  | 32.6  | 36.9  | 37.8  | 39.2  | 38.8  | 37.8  | 34.8  | 35.9  | 38.2  | 37.5  | 43.4  | 44.1  |
| Lims2  | 6.5   | 5.2   | 3.0   | 7.8   | 4.8   | 5.6   | 7.3   | 4.0   | 9.1   | 6.0   | 10.6  | 6.9   |
| Lin37  | 5.4   | 6.7   | 6.6   | 7.2   | 5.1   | 4.8   | 6.1   | 5.7   | 5.0   | 5.9   | 6.0   | 4.9   |
| Lin52  | 7.6   | 6.5   | 7.6   | 8.3   | 6.4   | 7.5   | 6.7   | 6.0   | 7.4   | 7.4   | 7.0   | 7.6   |
| Lin54  | 3.4   | 4.4   | 5.3   | 3.5   | 4.6   | 3.2   | 5.4   | 3.9   | 4.5   | 4.0   | 5.5   | 5.2   |
| Lin7a  | 0.0   | 0.0   | 0.0   | 0.0   | 0.0   | 0.0   | 0.0   | 0.0   | 0.0   | 0.0   | 0.0   | 0.0   |
| Lin7b  | 0.4   | 0.3   | 0.5   | 0.1   | 0.3   | 1.0   | 0.2   | 0.3   | 0.4   | 0.2   | 0.5   | 0.4   |
| Lin7c  | 21.4  | 23.5  | 25.5  | 28.8  | 19.2  | 28.6  | 21.8  | 17.2  | 18.8  | 20.3  | 26.3  | 25.2  |
| Lin9   | 1.2   | 1.8   | 2.6   | 1.4   | 2.0   | 1.3   | 2.0   | 1.6   | 1.8   | 1.4   | 2.5   | 1.7   |
| Lingo1 | 1.6   | 2.7   | 3.0   | 1.7   | 2.1   | 2.9   | 3.6   | 3.4   | 4.1   | 1.9   | 2.8   | 2.4   |
| Lingo4 | 0.0   | 0.0   | 0.0   | 0.0   | 0.0   | 0.0   | 0.0   | 0.0   | 0.0   | 0.1   | 0.0   | 0.0   |
| Lins   | 1.8   | 1.5   | 1.3   | 2.0   | 1.4   | 2.3   | 1.6   | 1.9   | 1.5   | 1.6   | 1.6   | 1.3   |
| Lipa   | 44.1  | 33.6  | 33.4  | 72.3  | 87.7  | 37.6  | 28.9  | 31.9  | 30.9  | 29.5  | 27.8  | 34.8  |
| Lipc   | 0.1   | 0.0   | 0.1   | 0.1   | 0.1   | 0.1   | 0.0   | 0.0   | 0.1   | 0.0   | 0.1   | 0.0   |
| Lipe   | 1.9   | 2.4   | 2.5   | 2.3   | 2.3   | 1.9   | 1.6   | 2.0   | 1.3   | 1.8   | 1.7   | 2.0   |
| Lipg   | 1.0   | 0.9   | 0.3   | 0.6   | 0.2   | 0.5   | 0.7   | 0.7   | 0.7   | 0.8   | 1.3   | 0.6   |
| Liph   | 0.1   | 0.1   | 0.0   | 0.0   | 0.1   | 0.0   | 0.1   | 0.0   | 0.0   | 0.0   | 0.0   | 0.0   |
| Lipn   | 0.1   | 0.0   | 0.0   | 0.0   | 0.0   | 0.1   | 0.0   | 0.0   | 0.0   | 0.0   | 0.0   | 0.0   |
| Lipo1  | 8.1   | 7.1   | 7.4   | 11.6  | 8.5   | 9.0   | 9.5   | 7.7   | 8.3   | 7.8   | 10.6  | 9.5   |
| Lipt1  | 2.5   | 2.0   | 1.6   | 3.5   | 2.3   | 2.6   | 2.2   | 2.3   | 2.2   | 2.3   | 2.0   | 2.0   |
| Lipt2  | 2.2   | 1.7   | 1.3   | 2.0   | 1.2   | 0.9   | 1.5   | 2.4   | 1.7   | 1.7   | 2.5   | 1.7   |
| Litaf  | 56.8  | 45.4  | 40.9  | 61.1  | 75.1  | 43.4  | 54.5  | 44.4  | 47.1  | 51.4  | 49.2  | 48.0  |
| Lix1   | 0.8   | 0.6   | 0.7   | 1.1   | 1.8   | 1.0   | 0.5   | 0.4   | 0.2   | 0.4   | 0.5   | 0.5   |
| Lix1l  | 24.0  | 28.5  | 32.6  | 25.0  | 23.5  | 27.9  | 28.4  | 29.9  | 29.2  | 29.7  | 29.5  | 31.4  |
| Ligl1  | 4.6   | 5.1   | 6.2   | 4.6   | 5.1   | 4.9   | 5.5   | 7.1   | 6.3   | 5.6   | 4.9   | 5.1   |
| Ligl2  | 4.2   | 4.2   | 3.0   | 3.2   | 3.5   | 3.2   | 4.0   | 3.1   | 3.9   | 3.7   | 3.5   | 3.2   |
| Llph   | 51.5  | 35.5  | 39.1  | 62.6  | 35.3  | 53.9  | 38.3  | 26.3  | 24.5  | 37.7  | 46.0  | 41.8  |
| Lman1  | 114.8 | 104.5 | 122.4 | 133.3 | 94.2  | 110.3 | 120.0 | 123.5 | 96.3  | 96.5  | 117.7 | 122.2 |
| Lman1l | 0.1   | 0.0   | 0.0   | 0.1   | 0.1   | 0.1   | 0.1   | 0.0   | 0.1   | 0.0   | 0.0   | 0.1   |
| Lman2  | 46.1  | 42.1  | 38.3  | 55.3  | 48.0  | 47.4  | 47.0  | 41.9  | 44.0  | 49.6  | 44.1  | 43.5  |
| Lman2l | 3.6   | 3.7   | 3.3   | 4.3   | 3.7   | 3.7   | 2.7   | 3.1   | 3.7   | 4.0   | 3.0   | 4.1   |
| Lmbr1  | 6.3   | 6.3   | 6.5   | 4.6   | 4.8   | 4.8   | 5.3   | 7.2   | 6.4   | 5.4   | 6.3   | 6.0   |
| Lmbr1l | 1.9   | 2.2   | 1.9   | 1.4   | 2.1   | 1.4   | 1.7   | 2.0   | 2.8   | 2.4   | 1.8   | 2.0   |
| Lmbrd1 | 9.4   | 10.4  | 9.2   | 12.2  | 10.5  | 11.8  | 9.8   | 8.4   | 9.0   | 10.4  | 9.9   | 9.6   |
| Lmbrd2 | 5.6   | 5.3   | 5.3   | 6.1   | 5.3   | 5.3   | 5.7   | 4.2   | 4.1   | 6.1   | 6.6   | 5.4   |
| Lmcd1  | 13.0  | 12.0  | 12.1  | 9.8   | 7.2   | 6.1   | 7.1   | 9.6   | 9.7   | 8.9   | 10.5  | 13.3  |
| Lmf1   | 11.0  | 10.3  | 9.4   | 13.1  | 11.0  | 12.9  | 11.0  | 13.4  | 11.1  | 10.8  | 10.3  | 11.0  |
| Lmf2   | 8.3   | 10.1  | 11.0  | 8.6   | 10.3  | 9.6   | 12.1  | 10.8  | 11.9  | 9.3   | 9.6   | 8.6   |
| Lmln   | 0.7   | 0.5   | 0.4   | 0.7   | 0.4   | 0.9   | 0.5   | 0.9   | 0.7   | 0.7   | 0.8   | 0.6   |
| Lmna   | 172.4 | 152.8 | 138.9 | 183.4 | 149.1 | 157.7 | 189.6 | 192.5 | 163.1 | 160.9 | 182.4 | 159.5 |
| Lmnb1  | 1.6   | 1.8   | 2.9   | 0.6   | 2.5   | 0.7   | 3.8   | 2.5   | 2.8   | 1.9   | 2.3   | 2.0   |
| Lmnb2  | 1.8   | 2.7   | 2.8   | 1.7   | 2.9   | 1.7   | 4.3   | 3.6   | 3.6   | 2.2   | 2.8   | 2.1   |
| Lmo1   | 0.5   | 0.2   | 0.2   | 0.1   | 0.1   | 0.1   | 0.2   | 0.2   | 0.1   | 0.1   | 0.1   | 0.2   |
| Lmo2   | 1.3   | 0.3   | 0.4   | 7.3   | 8.0   | 0.3   | 1.0   | 0.4   | 0.3   | 0.7   | 0.2   | 0.7   |
| Lmo4   | 27.5  | 22.3  | 32.6  | 22.3  | 19.6  | 19.0  | 23.4  | 29.1  | 26.1  | 37.9  | 37.4  | 32.8  |
| Lmo7   | 1.4   | 0.5   | 0.6   | 1.2   | 0.5   | 0.8   | 0.8   | 0.7   | 0.6   | 0.5   | 0.6   | 0.5   |
| Lmod1  | 4.0   | 2.4   | 2.5   | 6.3   | 3.9   | 3.0   | 6.1   | 2.0   | 4.6   | 6.0   | 12.3  | 7.4   |
| Lmod2  | 0.1   | 0.0   | 0.1   | 0.1   | 0.0   | 0.0   | 0.1   | 0.0   | 0.0   | 0.0   | 0.0   | 0.0   |
| Lmod3  | 0.0   | 0.0   | 0.1   | 0.0   | 0.0   | 0.0   | 0.0   | 0.1   | 0.0   | 0.0   | 0.0   | 0.0   |
| Lmtk2  | 5.7   | 5.6   | 4.8   | 4.7   | 4.9   | 5.3   | 5.1   | 3.6   | 4.8   | 4.5   | 4.1   | 4.0   |

Online Table 1

|              |       |       |       |       |       |       |        |        |       |       |       |       |
|--------------|-------|-------|-------|-------|-------|-------|--------|--------|-------|-------|-------|-------|
| Lmtk3        | 0.0   | 0.0   | 0.0   | 0.0   | 0.0   | 0.0   | 0.0    | 0.0    | 0.0   | 0.0   | 0.0   | 0.0   |
| Lmx1b        | 0.0   | 0.0   | 0.1   | 0.0   | 0.0   | 0.1   | 0.0    | 0.0    | 0.0   | 0.0   | 0.0   | 0.0   |
| Lnp          | 2.9   | 3.8   | 4.4   | 4.4   | 3.5   | 4.4   | 4.3    | 3.8    | 3.6   | 3.2   | 4.5   | 4.2   |
| Lnpep        | 16.4  | 19.7  | 21.5  | 18.2  | 22.2  | 18.3  | 18.9   | 19.4   | 18.6  | 19.8  | 22.6  | 21.3  |
| Lnx1         | 3.4   | 2.3   | 2.8   | 1.9   | 0.8   | 1.6   | 0.7    | 1.0    | 0.4   | 1.9   | 1.0   | 1.5   |
| Lnx2         | 1.9   | 2.1   | 2.1   | 2.1   | 2.0   | 1.8   | 2.0    | 2.6    | 2.4   | 2.8   | 2.5   | 2.2   |
| LOC100038947 | 0.5   | 0.0   | 0.0   | 0.5   | 5.2   | 0.0   | 0.3    | 0.1    | 0.0   | 0.1   | 0.0   | 0.0   |
| LOC100503496 | 0.1   | 0.2   | 0.1   | 0.2   | 0.2   | 0.2   | 0.1    | 0.4    | 0.2   | 0.2   | 0.2   | 0.1   |
| LOC100504608 | 0.7   | 0.6   | 1.0   | 0.8   | 1.0   | 1.1   | 1.1    | 1.4    | 0.7   | 0.5   | 0.8   | 0.8   |
| LOC100504703 | 2.6   | 3.7   | 4.0   | 2.9   | 3.6   | 2.8   | 1.1    | 3.9    | 2.0   | 3.5   | 2.7   | 4.7   |
| LOC100861615 | 0.3   | 0.6   | 0.6   | 0.7   | 0.5   | 0.6   | 0.8    | 0.7    | 0.6   | 0.6   | 0.6   | 0.6   |
| LOC100861978 | 0.0   | 0.0   | 0.0   | 0.0   | 0.0   | 0.0   | 0.0    | 0.0    | 0.0   | 0.0   | 0.0   | 0.0   |
| LOC106740    | 3.3   | 3.2   | 3.8   | 4.0   | 3.0   | 4.2   | 3.4    | 2.7    | 3.5   | 3.2   | 3.2   | 3.1   |
| LOC171588    | 0.1   | 0.0   | 0.1   | 0.0   | 0.2   | 0.1   | 0.1    | 0.2    | 0.0   | 0.1   | 0.1   | 0.1   |
| Loh12cr1     | 3.6   | 3.7   | 3.6   | 3.4   | 2.7   | 4.7   | 2.8    | 3.0    | 3.1   | 3.4   | 3.0   | 2.9   |
| Lonp1        | 35.3  | 26.7  | 22.6  | 43.0  | 22.6  | 37.7  | 25.8   | 29.6   | 23.5  | 23.2  | 28.5  | 25.0  |
| Lonp2        | 43.5  | 38.8  | 35.6  | 39.6  | 32.2  | 36.7  | 34.0   | 30.6   | 31.1  | 38.1  | 37.7  | 39.1  |
| Lonrf1       | 1.6   | 1.8   | 1.7   | 0.6   | 1.3   | 1.7   | 1.5    | 2.1    | 2.1   | 1.2   | 1.8   | 1.2   |
| Lonrf2       | 2.8   | 2.3   | 1.4   | 3.7   | 1.6   | 3.7   | 2.2    | 1.1    | 1.4   | 1.3   | 1.5   | 1.6   |
| Lonrf3       | 0.6   | 0.9   | 1.1   | 1.3   | 2.4   | 0.4   | 0.8    | 0.5    | 0.6   | 0.5   | 0.3   | 0.4   |
| Lor          | 0.1   | 0.0   | 0.0   | 0.1   | 0.0   | 0.0   | 0.0    | 0.0    | 0.0   | 0.0   | 0.0   | 0.0   |
| Lox          | 825.0 | 871.5 | 807.1 | 726.0 | 640.3 | 839.1 | 1050.3 | 1240.2 | 974.2 | 651.1 | 992.2 | 878.5 |
| Loxl1        | 51.5  | 57.7  | 69.8  | 46.6  | 63.2  | 44.5  | 79.7   | 76.1   | 79.3  | 64.0  | 52.1  | 60.1  |
| Loxl2        | 194.9 | 200.3 | 152.8 | 208.5 | 219.9 | 219.9 | 195.8  | 149.0  | 188.0 | 152.6 | 152.6 | 152.9 |
| Loxl3        | 49.3  | 45.7  | 40.8  | 59.8  | 70.6  | 61.8  | 103.5  | 39.0   | 73.0  | 75.8  | 72.2  | 84.5  |
| Loxl4        | 3.9   | 3.3   | 3.8   | 3.9   | 4.0   | 4.2   | 5.0    | 6.7    | 6.6   | 2.6   | 4.0   | 4.0   |
| Lpar1        | 39.2  | 45.8  | 54.5  | 55.4  | 46.5  | 50.6  | 48.8   | 47.0   | 33.9  | 37.9  | 44.7  | 41.5  |
| Lpar2        | 0.7   | 0.6   | 0.3   | 0.3   | 0.3   | 0.7   | 0.2    | 0.5    | 0.5   | 1.3   | 0.5   | 0.5   |
| Lpar3        | 0.1   | 0.0   | 0.3   | 0.0   | 0.1   | 0.1   | 0.1    | 0.3    | 0.2   | 0.1   | 0.0   | 0.2   |
| Lpar4        | 0.2   | 0.3   | 0.3   | 0.3   | 0.2   | 0.2   | 0.3    | 0.8    | 0.6   | 0.3   | 0.3   | 0.2   |
| Lpar5        | 0.0   | 0.0   | 0.0   | 0.2   | 0.2   | 0.1   | 0.0    | 0.1    | 0.0   | 0.0   | 0.0   | 0.1   |
| Lpar6        | 3.7   | 3.5   | 2.7   | 3.6   | 3.4   | 2.7   | 2.6    | 2.5    | 2.8   | 4.8   | 3.9   | 3.6   |
| Lpcat1       | 4.7   | 3.6   | 3.6   | 6.5   | 5.7   | 4.6   | 6.0    | 4.5    | 4.7   | 4.8   | 5.3   | 4.5   |
| Lpcat2       | 1.1   | 0.2   | 0.2   | 4.1   | 5.5   | 0.3   | 0.9    | 0.3    | 0.4   | 2.4   | 1.7   | 1.1   |
| Lpcat3       | 8.4   | 11.9  | 13.8  | 8.5   | 10.5  | 8.5   | 13.9   | 18.6   | 14.7  | 9.7   | 13.1  | 10.8  |
| Lpcat4       | 3.9   | 4.9   | 5.4   | 3.5   | 5.4   | 3.2   | 5.7    | 5.7    | 4.6   | 6.2   | 5.8   | 4.5   |
| Lpgat1       | 14.8  | 17.2  | 25.5  | 13.9  | 18.4  | 12.4  | 20.0   | 23.6   | 19.3  | 15.7  | 16.6  | 25.4  |
| Lphn1        | 1.5   | 2.3   | 3.0   | 1.0   | 2.1   | 1.5   | 2.9    | 2.7    | 2.8   | 3.8   | 2.5   | 2.2   |
| Lphn2        | 1.5   | 1.1   | 1.9   | 1.4   | 1.9   | 1.3   | 2.0    | 1.8    | 2.2   | 2.7   | 2.2   | 2.2   |
| Lphn3        | 0.1   | 0.1   | 0.1   | 0.0   | 0.1   | 0.0   | 0.1    | 0.1    | 0.1   | 0.1   | 0.1   | 0.1   |
| Lpin1        | 10.0  | 9.6   | 8.0   | 9.5   | 6.7   | 12.9  | 5.9    | 4.6    | 5.1   | 7.8   | 6.8   | 6.8   |
| Lpin2        | 6.2   | 6.5   | 5.5   | 6.7   | 8.2   | 7.6   | 5.9    | 4.5    | 4.8   | 6.0   | 5.3   | 5.6   |
| Lpin3        | 5.6   | 4.7   | 4.3   | 6.5   | 5.9   | 6.3   | 4.7    | 4.0    | 4.0   | 3.2   | 3.7   | 3.7   |
| Lpl          | 7.7   | 12.6  | 21.0  | 32.4  | 60.3  | 5.5   | 7.7    | 10.5   | 4.5   | 5.6   | 2.6   | 4.0   |
| Lpp          | 10.8  | 11.6  | 11.1  | 10.2  | 12.3  | 9.4   | 11.8   | 10.3   | 10.9  | 11.4  | 13.4  | 10.6  |
| Lpxn         | 0.5   | 0.1   | 0.1   | 6.9   | 12.7  | 0.2   | 1.8    | 0.3    | 0.4   | 0.6   | 0.4   | 0.8   |
| Lrat         | 0.0   | 0.0   | 0.0   | 0.0   | 0.0   | 0.0   | 0.0    | 0.0    | 0.0   | 0.0   | 0.0   | 0.0   |
| Lrba         | 3.8   | 3.7   | 3.7   | 3.6   | 3.4   | 4.3   | 2.7    | 3.6    | 3.1   | 3.7   | 3.7   | 3.5   |
| Lrch1        | 5.3   | 8.1   | 8.3   | 6.6   | 7.7   | 5.1   | 8.1    | 8.0    | 8.4   | 5.1   | 7.6   | 8.2   |
| Lrch2        | 0.4   | 0.6   | 0.7   | 0.4   | 0.4   | 0.8   | 0.6    | 0.5    | 0.6   | 0.4   | 0.5   | 0.5   |
| Lrch3        | 6.6   | 7.0   | 7.6   | 7.2   | 7.5   | 6.4   | 7.6    | 7.5    | 7.1   | 6.7   | 7.4   | 7.2   |
| Lrch4        | 5.2   | 5.4   | 5.6   | 8.3   | 10.4  | 6.8   | 6.6    | 5.0    | 5.4   | 4.3   | 4.9   | 4.2   |
| Lrdd         | 1.4   | 1.6   | 1.6   | 1.2   | 1.8   | 1.5   | 1.9    | 0.8    | 1.4   | 1.5   | 1.4   | 1.1   |
| Lrfn1        | 0.3   | 0.5   | 0.4   | 0.1   | 0.5   | 0.5   | 0.4    | 0.5    | 0.3   | 0.3   | 0.4   | 0.3   |
| Lrfn3        | 1.0   | 1.4   | 1.1   | 1.1   | 1.0   | 1.3   | 0.8    | 1.0    | 1.3   | 1.0   | 0.9   | 1.2   |
| Lrfn4        | 3.0   | 2.6   | 3.6   | 2.7   | 2.9   | 2.7   | 2.5    | 5.1    | 3.2   | 2.9   | 1.9   | 2.9   |
| Lrg1         | 0.1   | 0.3   | 0.1   | 0.2   | 0.2   | 0.1   | 0.1    | 0.0    | 0.1   | 0.0   | 0.0   | 0.1   |

Online Table 1

|         |      |      |      |      |      |      |      |      |      |      |      |      |
|---------|------|------|------|------|------|------|------|------|------|------|------|------|
| Lrguk   | 0.1  | 0.1  | 0.1  | 0.1  | 0.0  | 0.1  | 0.0  | 0.0  | 0.0  | 0.0  | 0.0  | 0.0  |
| Lrif1   | 3.5  | 3.3  | 4.9  | 4.9  | 3.5  | 3.7  | 3.2  | 3.8  | 3.0  | 4.8  | 4.5  | 4.7  |
| Lrig1   | 10.6 | 8.2  | 8.9  | 10.6 | 10.2 | 10.5 | 11.5 | 6.9  | 8.6  | 10.3 | 8.4  | 9.4  |
| Lrig2   | 2.7  | 3.0  | 2.7  | 2.4  | 2.5  | 2.7  | 2.2  | 2.4  | 2.9  | 3.1  | 2.8  | 2.6  |
| Lrig3   | 3.4  | 3.5  | 4.7  | 2.4  | 3.0  | 2.7  | 3.5  | 4.6  | 3.7  | 5.4  | 4.5  | 4.1  |
| Lrmp    | 0.1  | 0.0  | 0.0  | 2.0  | 2.9  | 0.1  | 0.4  | 0.1  | 0.1  | 0.2  | 0.1  | 0.2  |
| Lrp1    | 52.7 | 77.4 | 78.7 | 47.6 | 81.6 | 58.4 | 96.3 | 75.5 | 86.8 | 59.0 | 51.3 | 47.8 |
| Lrp10   | 25.3 | 23.0 | 20.8 | 27.0 | 26.4 | 29.8 | 28.8 | 23.1 | 28.4 | 27.5 | 23.7 | 21.9 |
| Lrp11   | 10.2 | 7.2  | 5.3  | 11.0 | 6.8  | 12.1 | 8.4  | 5.6  | 6.2  | 7.2  | 8.6  | 7.5  |
| Lrp12   | 5.6  | 5.2  | 5.7  | 6.0  | 5.7  | 4.5  | 5.7  | 5.7  | 5.9  | 4.5  | 4.9  | 5.7  |
| Lrp1b   | 0.0  | 0.0  | 0.0  | 0.0  | 0.0  | 0.0  | 0.0  | 0.0  | 0.0  | 0.0  | 0.0  | 0.0  |
| Lrp2    | 1.9  | 0.5  | 0.3  | 0.7  | 0.1  | 0.6  | 0.2  | 0.8  | 1.0  | 23.6 | 9.4  | 3.2  |
| Lrp2bp  | 0.0  | 0.1  | 0.0  | 0.1  | 0.1  | 0.0  | 0.1  | 0.1  | 0.1  | 0.0  | 0.1  | 0.1  |
| Lrp3    | 3.5  | 3.5  | 3.2  | 4.1  | 2.7  | 4.9  | 4.0  | 3.1  | 3.0  | 2.4  | 3.2  | 2.7  |
| Lrp4    | 0.8  | 1.2  | 1.4  | 0.7  | 0.8  | 0.9  | 1.0  | 1.8  | 1.5  | 0.5  | 0.8  | 0.9  |
| Lrp5    | 10.7 | 12.8 | 12.8 | 12.0 | 11.6 | 12.5 | 13.7 | 10.3 | 11.9 | 9.0  | 8.2  | 9.4  |
| Lrp6    | 16.9 | 20.4 | 24.5 | 15.9 | 16.1 | 16.9 | 18.9 | 20.3 | 18.9 | 18.6 | 20.3 | 21.5 |
| Lrp8    | 1.2  | 0.9  | 0.9  | 2.1  | 1.5  | 1.6  | 1.5  | 1.3  | 0.7  | 0.6  | 1.0  | 0.6  |
| Lrpap1  | 53.1 | 45.3 | 47.2 | 65.0 | 49.2 | 60.6 | 45.4 | 42.3 | 41.4 | 45.6 | 43.4 | 48.4 |
| Lrpprc  | 14.8 | 10.3 | 8.3  | 14.0 | 12.6 | 14.0 | 9.9  | 10.0 | 9.0  | 11.9 | 11.8 | 10.3 |
| Lrr1    | 0.1  | 0.4  | 0.8  | 0.1  | 0.7  | 0.2  | 0.8  | 0.3  | 0.5  | 0.3  | 0.3  | 0.2  |
| Lrrc1   | 1.5  | 1.7  | 1.5  | 1.5  | 1.2  | 1.8  | 1.0  | 1.5  | 1.6  | 3.4  | 2.5  | 1.8  |
| Lrrc10b | 0.0  | 0.0  | 0.0  | 0.0  | 0.0  | 0.0  | 0.0  | 0.0  | 0.0  | 0.1  | 0.0  | 0.1  |
| Lrrc14  | 7.5  | 6.3  | 5.4  | 6.4  | 6.9  | 7.7  | 6.7  | 6.5  | 7.7  | 6.2  | 5.7  | 6.3  |
| Lrrc14b | 1.5  | 1.2  | 1.4  | 1.7  | 1.2  | 1.3  | 1.0  | 1.1  | 1.1  | 1.7  | 1.5  | 1.2  |
| Lrrc15  | 0.0  | 0.0  | 0.0  | 0.0  | 0.0  | 0.1  | 0.0  | 0.0  | 0.0  | 0.0  | 0.0  | 0.0  |
| Lrrc16a | 4.6  | 4.4  | 5.8  | 4.5  | 4.4  | 4.0  | 6.2  | 5.0  | 4.4  | 3.6  | 3.7  | 4.9  |
| Lrrc16b | 0.1  | 0.0  | 0.1  | 0.1  | 0.0  | 0.0  | 0.2  | 0.2  | 0.1  | 0.1  | 0.1  | 0.1  |
| Lrrc17  | 0.2  | 0.4  | 0.4  | 0.2  | 0.1  | 0.1  | 0.2  | 4.1  | 0.6  | 0.5  | 1.1  | 0.3  |
| Lrrc18  | 0.0  | 0.0  | 0.0  | 0.1  | 0.0  | 0.0  | 0.1  | 0.0  | 0.0  | 0.0  | 0.0  | 0.0  |
| Lrrc19  | 0.0  | 0.0  | 0.1  | 0.2  | 0.0  | 0.0  | 0.1  | 0.1  | 0.1  | 0.1  | 0.0  | 0.1  |
| Lrrc2   | 0.0  | 0.0  | 0.0  | 0.0  | 0.0  | 0.0  | 0.0  | 0.0  | 0.0  | 0.0  | 0.0  | 0.0  |
| Lrrc20  | 3.6  | 3.1  | 3.2  | 3.4  | 4.2  | 3.2  | 3.7  | 3.7  | 3.3  | 2.7  | 3.6  | 2.7  |
| Lrrc23  | 0.0  | 0.0  | 0.1  | 0.1  | 0.0  | 0.0  | 0.0  | 0.0  | 0.0  | 0.1  | 0.1  | 0.0  |
| Lrrc24  | 0.5  | 0.3  | 0.4  | 0.1  | 0.7  | 0.6  | 0.4  | 0.3  | 0.5  | 0.6  | 0.5  | 0.6  |
| Lrrc25  | 0.6  | 0.0  | 0.0  | 6.8  | 13.4 | 0.0  | 1.8  | 0.2  | 0.1  | 0.9  | 0.3  | 0.8  |
| Lrrc26  | 0.1  | 0.0  | 0.0  | 0.0  | 0.0  | 0.0  | 0.1  | 0.1  | 0.0  | 0.0  | 0.0  | 0.0  |
| Lrrc27  | 11.7 | 9.6  | 7.7  | 14.1 | 8.1  | 10.8 | 9.3  | 7.0  | 5.6  | 4.6  | 9.7  | 6.0  |
| Lrrc28  | 5.2  | 4.6  | 4.4  | 5.1  | 4.0  | 5.7  | 4.2  | 5.3  | 3.8  | 4.6  | 4.9  | 3.5  |
| Lrrc29  | 0.2  | 0.3  | 0.4  | 0.1  | 0.2  | 0.3  | 0.3  | 0.1  | 0.3  | 0.4  | 0.4  | 0.2  |
| Lrrc3   | 0.6  | 0.7  | 0.7  | 0.4  | 0.5  | 0.6  | 0.5  | 0.3  | 0.3  | 0.2  | 0.2  | 0.3  |
| Lrrc32  | 23.7 | 20.0 | 18.7 | 29.2 | 30.3 | 33.1 | 47.7 | 18.8 | 47.7 | 22.0 | 21.7 | 38.8 |
| Lrrc33  | 0.6  | 0.2  | 0.2  | 3.7  | 5.3  | 0.1  | 0.4  | 0.3  | 0.1  | 0.5  | 0.2  | 0.2  |
| Lrrc34  | 0.1  | 0.0  | 0.0  | 0.2  | 0.0  | 0.0  | 0.0  | 0.0  | 0.0  | 0.1  | 0.0  | 0.0  |
| Lrrc36  | 0.0  | 0.0  | 0.1  | 0.0  | 0.0  | 0.0  | 0.1  | 0.0  | 0.0  | 0.0  | 0.1  | 0.0  |
| Lrrc39  | 0.3  | 0.3  | 0.3  | 0.5  | 0.4  | 0.2  | 0.2  | 0.1  | 0.2  | 0.2  | 0.2  | 0.2  |
| Lrrc4   | 0.1  | 0.2  | 0.2  | 0.0  | 0.1  | 0.1  | 0.2  | 0.1  | 0.1  | 0.3  | 0.2  | 0.2  |
| Lrrc40  | 4.3  | 5.2  | 5.6  | 5.1  | 4.3  | 4.5  | 4.3  | 4.7  | 4.4  | 3.7  | 5.0  | 4.5  |
| Lrrc41  | 19.7 | 22.8 | 18.8 | 19.7 | 18.1 | 20.4 | 21.4 | 21.6 | 20.9 | 20.8 | 18.9 | 18.2 |
| Lrrc42  | 8.4  | 11.0 | 10.8 | 7.4  | 8.7  | 8.6  | 9.9  | 12.2 | 12.1 | 11.2 | 10.7 | 9.9  |
| Lrrc45  | 7.3  | 7.5  | 7.8  | 6.6  | 6.2  | 6.7  | 7.1  | 6.6  | 6.8  | 6.9  | 6.5  | 5.8  |
| Lrrc46  | 0.2  | 0.3  | 0.4  | 0.2  | 0.0  | 0.1  | 0.0  | 0.1  | 0.1  | 0.2  | 0.2  | 0.1  |
| Lrrc47  | 3.3  | 3.8  | 3.4  | 3.2  | 4.0  | 3.3  | 3.9  | 4.1  | 3.1  | 3.8  | 3.4  | 3.4  |
| Lrrc48  | 0.7  | 0.7  | 0.5  | 0.7  | 0.3  | 1.0  | 0.4  | 0.4  | 0.3  | 0.4  | 0.5  | 0.4  |
| Lrrc49  | 4.0  | 3.3  | 3.9  | 3.8  | 3.6  | 4.4  | 4.3  | 4.5  | 3.9  | 4.9  | 5.3  | 4.4  |
| Lrrc4b  | 0.0  | 0.0  | 0.0  | 0.0  | 0.0  | 0.0  | 0.0  | 0.0  | 0.0  | 0.1  | 0.0  | 0.0  |
| Lrrc4c  | 0.2  | 0.2  | 0.0  | 0.2  | 0.1  | 0.1  | 0.4  | 0.2  | 0.2  | 0.8  | 0.7  | 0.4  |

Online Table 1

|         |      |      |      |      |      |      |      |      |      |      |      |      |
|---------|------|------|------|------|------|------|------|------|------|------|------|------|
| Lrrc51  | 15.8 | 16.2 | 13.4 | 15.9 | 9.4  | 16.6 | 8.2  | 9.8  | 8.2  | 11.1 | 10.0 | 10.4 |
| Lrrc55  | 0.0  | 0.1  | 0.0  | 0.0  | 0.0  | 0.0  | 0.1  | 0.0  | 0.0  | 0.0  | 0.1  | 0.1  |
| Lrrc56  | 0.9  | 0.9  | 1.0  | 0.7  | 0.8  | 0.7  | 1.0  | 1.4  | 0.9  | 0.8  | 0.9  | 1.0  |
| Lrrc57  | 12.8 | 12.5 | 10.2 | 11.5 | 10.0 | 14.7 | 9.9  | 9.1  | 8.8  | 10.3 | 10.6 | 10.6 |
| Lrrc58  | 35.6 | 39.6 | 42.4 | 43.0 | 44.8 | 46.9 | 48.0 | 43.3 | 45.4 | 44.0 | 47.8 | 49.0 |
| Lrrc59  | 61.1 | 53.3 | 50.0 | 63.8 | 61.8 | 54.1 | 72.3 | 71.8 | 60.7 | 59.3 | 70.0 | 59.1 |
| Lrrc61  | 1.6  | 1.4  | 1.5  | 2.1  | 1.8  | 1.9  | 1.7  | 1.9  | 1.8  | 1.4  | 1.7  | 1.8  |
| Lrrc69  | 0.0  | 0.0  | 0.1  | 0.0  | 0.0  | 0.0  | 0.0  | 0.0  | 0.0  | 0.0  | 0.1  | 0.0  |
| Lrrc71  | 2.0  | 2.3  | 2.0  | 2.0  | 2.0  | 2.2  | 2.4  | 1.9  | 2.1  | 1.6  | 1.9  | 1.5  |
| Lrrc73  | 1.0  | 1.2  | 0.9  | 1.9  | 1.1  | 2.0  | 0.6  | 0.8  | 1.6  | 1.8  | 0.9  | 1.1  |
| Lrrc8a  | 9.7  | 11.0 | 12.3 | 10.6 | 11.5 | 11.9 | 13.9 | 16.0 | 15.4 | 12.0 | 12.8 | 11.9 |
| Lrrc8b  | 3.1  | 2.5  | 2.9  | 2.9  | 2.9  | 3.6  | 2.6  | 3.0  | 2.2  | 1.8  | 2.4  | 1.8  |
| Lrrc8c  | 9.1  | 11.4 | 13.4 | 6.3  | 10.6 | 8.4  | 12.2 | 10.0 | 9.4  | 9.2  | 9.7  | 8.0  |
| Lrrc8d  | 3.4  | 3.3  | 2.8  | 4.4  | 3.8  | 4.0  | 3.0  | 2.2  | 1.4  | 2.2  | 2.2  | 1.6  |
| Lrrc8e  | 0.4  | 0.3  | 0.3  | 0.3  | 0.2  | 0.5  | 0.3  | 0.4  | 0.5  | 0.4  | 0.4  | 0.6  |
| Lrrc9   | 0.3  | 0.5  | 0.4  | 0.2  | 0.3  | 0.4  | 0.3  | 0.1  | 0.1  | 0.1  | 0.1  | 0.2  |
| Lrrcc1  | 6.4  | 7.8  | 9.2  | 5.8  | 6.4  | 8.0  | 6.3  | 7.3  | 6.9  | 6.6  | 8.2  | 8.0  |
| Lrrd1   | 0.0  | 0.0  | 0.0  | 0.0  | 0.0  | 0.0  | 0.0  | 0.0  | 0.0  | 0.0  | 0.0  | 0.0  |
| Lrrfip1 | 67.9 | 47.6 | 42.0 | 61.2 | 49.1 | 53.3 | 54.7 | 36.9 | 38.2 | 55.9 | 62.6 | 58.8 |
| Lrrfip2 | 15.3 | 12.1 | 12.5 | 18.2 | 12.2 | 15.7 | 13.7 | 13.2 | 11.5 | 10.9 | 15.4 | 13.5 |
| Lrriq1  | 0.1  | 0.0  | 0.1  | 0.1  | 0.0  | 0.1  | 0.1  | 0.0  | 0.0  | 0.0  | 0.0  | 0.0  |
| Lrriq3  | 0.7  | 0.7  | 0.6  | 0.6  | 0.6  | 0.6  | 0.6  | 0.4  | 0.5  | 0.5  | 0.5  | 0.7  |
| Lrrk1   | 23.6 | 23.3 | 20.7 | 22.9 | 20.8 | 24.3 | 23.6 | 19.2 | 19.4 | 15.3 | 17.5 | 17.6 |
| Lrrk2   | 10.7 | 9.8  | 9.0  | 11.5 | 9.3  | 13.1 | 10.4 | 7.9  | 9.0  | 9.6  | 10.8 | 10.6 |
| Lrrn1   | 0.0  | 0.0  | 0.0  | 0.0  | 0.0  | 0.0  | 0.1  | 0.0  | 0.1  | 0.0  | 0.0  | 0.0  |
| Lrrn2   | 1.2  | 1.4  | 1.3  | 1.2  | 0.9  | 2.0  | 1.2  | 0.8  | 1.2  | 1.3  | 0.8  | 1.0  |
| Lrrn3   | 0.2  | 0.1  | 0.1  | 0.1  | 0.1  | 0.3  | 0.1  | 0.1  | 0.2  | 0.2  | 0.1  | 0.1  |
| Lrrn4   | 6.3  | 2.8  | 1.5  | 1.3  | 0.8  | 0.6  | 0.3  | 3.5  | 3.9  | 52.9 | 20.6 | 12.9 |
| Lrrn4cl | 7.1  | 6.0  | 5.1  | 6.9  | 3.1  | 11.8 | 4.0  | 4.6  | 4.9  | 5.3  | 8.4  | 6.0  |
| Lrrtm2  | 0.1  | 0.2  | 0.2  | 0.2  | 0.1  | 0.2  | 0.2  | 0.1  | 0.1  | 0.1  | 0.3  | 0.1  |
| Lrrtm3  | 0.0  | 0.0  | 0.0  | 0.0  | 0.0  | 0.0  | 0.0  | 0.0  | 0.0  | 0.0  | 0.0  | 0.0  |
| Lrsam1  | 6.4  | 5.3  | 4.8  | 7.0  | 4.7  | 6.8  | 4.9  | 4.9  | 5.8  | 5.8  | 5.4  | 5.7  |
| Lrtm1   | 0.0  | 0.0  | 0.0  | 0.0  | 0.0  | 0.0  | 0.0  | 0.0  | 0.0  | 0.0  | 0.0  | 0.0  |
| Lrtm2   | 0.2  | 0.0  | 0.0  | 0.0  | 0.0  | 0.0  | 0.0  | 0.1  | 0.0  | 0.2  | 0.1  | 0.0  |
| Lrwd1   | 6.4  | 6.8  | 7.1  | 6.0  | 6.6  | 6.1  | 7.6  | 6.8  | 6.8  | 7.4  | 6.5  | 6.2  |
| Lsamp   | 0.1  | 0.1  | 0.1  | 0.1  | 0.0  | 0.0  | 0.0  | 0.0  | 0.0  | 0.0  | 0.0  | 0.0  |
| Lsg1    | 13.6 | 11.8 | 11.3 | 15.7 | 11.6 | 11.5 | 12.5 | 10.5 | 9.7  | 12.5 | 14.1 | 13.2 |
| Lsm1    | 7.5  | 7.5  | 7.2  | 7.5  | 6.9  | 7.1  | 6.7  | 6.4  | 6.9  | 7.0  | 7.6  | 6.9  |
| Lsm10   | 17.9 | 16.6 | 16.8 | 20.3 | 14.8 | 20.9 | 14.5 | 17.2 | 14.8 | 14.8 | 16.0 | 15.6 |
| Lsm11   | 0.9  | 1.0  | 1.0  | 0.8  | 0.9  | 0.7  | 1.0  | 0.9  | 1.1  | 1.0  | 0.9  | 0.9  |
| Lsm12   | 16.9 | 16.3 | 17.2 | 20.2 | 17.6 | 18.6 | 17.8 | 19.3 | 16.0 | 15.1 | 21.0 | 17.9 |
| Lsm14a  | 19.0 | 24.2 | 23.3 | 20.6 | 20.2 | 21.9 | 20.1 | 23.1 | 22.3 | 22.5 | 22.6 | 24.7 |
| Lsm14b  | 12.9 | 12.5 | 12.3 | 10.7 | 10.6 | 11.7 | 13.2 | 12.8 | 12.8 | 11.8 | 12.7 | 11.7 |
| Lsm2    | 5.0  | 3.9  | 5.6  | 2.6  | 6.6  | 3.5  | 4.8  | 5.3  | 5.8  | 5.5  | 5.8  | 4.5  |
| Lsm3    | 26.3 | 29.9 | 33.6 | 29.1 | 29.0 | 21.2 | 31.9 | 34.2 | 28.5 | 29.3 | 28.0 | 29.1 |
| Lsm4    | 17.7 | 17.1 | 15.4 | 20.7 | 18.3 | 17.6 | 24.5 | 23.1 | 21.0 | 22.1 | 21.7 | 21.3 |
| Lsm5    | 11.5 | 12.4 | 17.4 | 12.8 | 14.4 | 13.7 | 10.4 | 12.6 | 13.7 | 15.3 | 16.8 | 15.1 |
| Lsm6    | 3.3  | 3.3  | 3.7  | 4.4  | 3.6  | 3.2  | 4.0  | 3.6  | 3.3  | 3.6  | 4.4  | 3.8  |
| Lsm7    | 41.4 | 32.0 | 35.0 | 36.4 | 33.0 | 34.4 | 30.9 | 35.6 | 28.2 | 45.3 | 31.2 | 31.7 |
| Lsmd1   | 37.7 | 29.4 | 28.4 | 36.4 | 32.3 | 36.5 | 35.3 | 32.3 | 29.4 | 34.4 | 34.1 | 33.7 |
| Lsp1    | 20.9 | 17.5 | 22.9 | 42.9 | 50.1 | 27.0 | 34.3 | 29.5 | 30.0 | 23.6 | 28.5 | 29.4 |
| Lsr     | 0.3  | 0.4  | 0.3  | 0.1  | 0.4  | 0.7  | 0.4  | 0.3  | 0.3  | 1.0  | 0.2  | 0.4  |
| Lss     | 12.5 | 15.0 | 13.2 | 6.2  | 8.0  | 8.4  | 19.7 | 19.6 | 16.8 | 5.6  | 18.1 | 7.2  |
| Lst1    | 3.1  | 0.3  | 0.8  | 12.9 | 31.4 | 0.6  | 8.1  | 0.4  | 2.0  | 4.0  | 0.6  | 2.4  |
| Lta     | 0.0  | 0.0  | 0.0  | 0.0  | 0.0  | 0.0  | 0.0  | 0.0  | 0.0  | 0.1  | 0.0  | 0.0  |
| Lta4h   | 33.5 | 29.6 | 28.1 | 28.1 | 30.8 | 29.6 | 30.2 | 32.5 | 30.7 | 33.7 | 32.9 | 35.0 |
| Ltb4r1  | 0.0  | 0.1  | 0.0  | 0.0  | 0.1  | 0.2  | 0.0  | 0.0  | 0.0  | 0.0  | 0.0  | 0.0  |

Online Table 1

|          |       |      |      |        |        |      |       |       |      |       |      |       |
|----------|-------|------|------|--------|--------|------|-------|-------|------|-------|------|-------|
| Ltb4r2   | 0.1   | 0.1  | 0.0  | 0.1    | 0.1    | 0.1  | 0.0   | 0.0   | 0.1  | 0.3   | 0.1  | 0.0   |
| Ltbp1    | 4.1   | 2.7  | 3.1  | 2.8    | 2.8    | 3.7  | 2.7   | 3.8   | 2.0  | 2.4   | 3.0  | 2.2   |
| Ltbp2    | 3.5   | 2.7  | 4.7  | 2.9    | 8.4    | 5.8  | 29.6  | 10.6  | 19.9 | 39.2  | 20.8 | 17.6  |
| Ltbp3    | 8.1   | 9.0  | 8.7  | 5.5    | 8.5    | 7.7  | 9.9   | 7.4   | 10.1 | 9.8   | 6.7  | 6.7   |
| Ltbp4    | 2.1   | 2.0  | 3.3  | 1.2    | 1.5    | 2.1  | 2.3   | 5.9   | 2.1  | 1.7   | 1.7  | 1.3   |
| Ltbr     | 39.8  | 34.7 | 37.3 | 35.4   | 38.2   | 36.2 | 45.7  | 42.7  | 43.4 | 40.5  | 41.2 | 38.1  |
| Ltc4s    | 0.9   | 0.2  | 0.2  | 1.9    | 1.8    | 0.6  | 0.2   | 0.5   | 0.5  | 0.8   | 0.4  | 0.4   |
| Ltf      | 0.1   | 0.0  | 0.1  | 0.0    | 0.0    | 0.0  | 0.0   | 0.0   | 0.0  | 0.0   | 0.0  | 0.0   |
| Ltk      | 0.2   | 0.0  | 0.1  | 0.0    | 0.0    | 0.1  | 0.0   | 0.0   | 0.0  | 0.1   | 0.0  | 0.1   |
| Ltn1     | 9.3   | 9.0  | 8.4  | 9.1    | 9.2    | 9.5  | 8.1   | 8.3   | 8.5  | 9.0   | 9.1  | 9.4   |
| Ltv1     | 14.8  | 13.2 | 12.7 | 17.5   | 12.7   | 13.4 | 15.5  | 13.6  | 11.5 | 14.3  | 16.8 | 14.4  |
| Luc7l1   | 11.1  | 12.2 | 11.4 | 10.3   | 10.6   | 10.9 | 10.8  | 9.9   | 11.5 | 13.2  | 12.0 | 11.0  |
| Luc7l2   | 20.3  | 20.6 | 26.5 | 23.1   | 19.7   | 21.4 | 25.6  | 23.9  | 19.1 | 19.1  | 26.1 | 24.7  |
| Luc7l3   | 20.0  | 19.7 | 26.2 | 21.2   | 18.7   | 17.5 | 22.8  | 21.3  | 17.5 | 17.1  | 22.5 | 28.1  |
| Lum      | 3.0   | 19.0 | 67.5 | 0.5    | 6.7    | 0.3  | 9.4   | 78.1  | 43.7 | 19.1  | 8.6  | 42.8  |
| Lurap1   | 1.5   | 1.6  | 1.0  | 1.5    | 1.0    | 1.6  | 1.1   | 1.1   | 1.0  | 1.6   | 0.7  | 1.4   |
| Lurap1l1 | 38.4  | 22.4 | 14.1 | 65.4   | 54.8   | 51.9 | 32.5  | 18.3  | 26.2 | 15.1  | 23.4 | 13.0  |
| Luzp1    | 26.2  | 31.5 | 29.7 | 27.3   | 29.9   | 24.0 | 30.7  | 27.8  | 30.4 | 28.8  | 32.2 | 33.4  |
| Luzp2    | 0.0   | 0.1  | 0.0  | 0.0    | 0.0    | 0.1  | 0.0   | 0.0   | 0.0  | 0.0   | 0.0  | 0.0   |
| Lxn      | 36.3  | 35.2 | 39.4 | 36.3   | 33.8   | 30.3 | 34.9  | 29.2  | 30.2 | 41.2  | 40.7 | 36.3  |
| Ly6a     | 97.9  | 87.1 | 85.2 | 91.7   | 68.0   | 70.4 | 67.6  | 162.8 | 59.3 | 36.0  | 68.9 | 53.4  |
| Ly6c1    | 3.8   | 2.0  | 1.9  | 4.0    | 2.8    | 2.0  | 4.2   | 5.7   | 3.7  | 2.1   | 4.8  | 3.6   |
| Ly6c2    | 0.5   | 0.5  | 0.1  | 0.4    | 0.3    | 0.5  | 1.2   | 0.7   | 0.7  | 0.3   | 0.8  | 0.5   |
| Ly6d     | 0.1   | 0.3  | 0.2  | 0.1    | 0.1    | 0.0  | 0.0   | 0.3   | 0.1  | 0.0   | 0.0  | 0.2   |
| Ly6e     | 22.3  | 24.2 | 28.2 | 45.7   | 27.0   | 26.0 | 22.4  | 22.3  | 15.5 | 15.5  | 14.3 | 18.5  |
| Ly6f     | 0.2   | 0.1  | 0.0  | 0.0    | 0.1    | 0.1  | 0.0   | 0.1   | 0.0  | 0.1   | 0.4  | 0.0   |
| Ly6g5b   | 0.0   | 0.1  | 0.1  | 0.0    | 0.1    | 0.1  | 0.0   | 0.3   | 0.1  | 0.2   | 0.0  | 0.0   |
| Ly6i     | 0.0   | 0.1  | 0.1  | 0.1    | 0.1    | 0.0  | 0.1   | 0.2   | 0.1  | 0.1   | 0.0  | 0.1   |
| Ly6k     | 3.0   | 2.2  | 2.9  | 1.6    | 0.8    | 0.6  | 1.5   | 1.4   | 1.2  | 3.5   | 2.8  | 2.2   |
| Ly75     | 0.6   | 0.7  | 0.8  | 0.4    | 0.6    | 0.5  | 0.9   | 0.6   | 0.8  | 1.2   | 1.4  | 0.8   |
| Ly86     | 0.8   | 0.0  | 0.1  | 4.6    | 7.8    | 0.0  | 1.0   | 0.1   | 0.1  | 0.1   | 0.2  | 0.8   |
| Ly9      | 0.7   | 0.5  | 0.2  | 3.9    | 6.1    | 0.3  | 0.8   | 0.3   | 0.3  | 1.0   | 0.9  | 0.6   |
| Ly96     | 7.9   | 8.9  | 7.9  | 12.1   | 9.8    | 8.3  | 5.6   | 5.6   | 7.5  | 10.0  | 7.1  | 9.1   |
| Lyar     | 11.7  | 10.5 | 12.9 | 14.1   | 10.7   | 11.3 | 13.7  | 8.9   | 7.8  | 9.7   | 12.1 | 12.4  |
| Lyl1     | 0.3   | 0.1  | 0.0  | 0.5    | 0.5    | 0.0  | 0.1   | 0.1   | 0.0  | 0.2   | 0.1  | 0.0   |
| Lyn      | 7.5   | 5.9  | 4.7  | 15.3   | 21.9   | 5.6  | 11.6  | 5.9   | 9.4  | 8.1   | 8.5  | 9.4   |
| Lynx1    | 24.1  | 19.4 | 17.8 | 25.3   | 17.9   | 28.3 | 20.1  | 16.4  | 16.3 | 16.7  | 18.6 | 19.8  |
| Lypd1    | 33.0  | 28.1 | 29.3 | 32.9   | 26.3   | 29.0 | 44.6  | 32.3  | 39.5 | 47.1  | 45.7 | 53.3  |
| Lypd6    | 0.0   | 0.0  | 0.0  | 0.0    | 0.0    | 0.0  | 0.0   | 0.0   | 0.0  | 0.0   | 0.0  | 0.0   |
| Lypd6b   | 0.0   | 0.0  | 0.0  | 0.0    | 0.0    | 0.0  | 0.0   | 0.1   | 0.0  | 0.0   | 0.0  | 0.0   |
| Lypla1   | 19.9  | 20.0 | 25.4 | 26.7   | 22.3   | 25.8 | 23.0  | 22.8  | 19.7 | 21.9  | 29.8 | 27.4  |
| Lypla2   | 6.7   | 6.3  | 5.9  | 8.6    | 9.8    | 6.5  | 7.5   | 8.5   | 8.4  | 7.6   | 6.0  | 5.9   |
| Lyplal1  | 7.2   | 5.8  | 4.7  | 6.1    | 4.0    | 8.0  | 3.6   | 4.7   | 3.6  | 4.7   | 4.7  | 5.5   |
| Lyrm1    | 3.8   | 4.0  | 3.5  | 5.1    | 3.3    | 4.8  | 3.6   | 3.4   | 3.6  | 3.9   | 3.7  | 4.6   |
| Lyrm2    | 18.5  | 12.8 | 13.7 | 16.3   | 11.7   | 18.9 | 11.9  | 13.4  | 11.5 | 15.9  | 16.3 | 15.9  |
| Lyrm4    | 4.8   | 4.3  | 4.1  | 5.3    | 3.7    | 5.2  | 4.3   | 4.6   | 3.8  | 4.7   | 4.7  | 4.6   |
| Lyrm5    | 20.1  | 21.2 | 18.4 | 23.1   | 19.0   | 25.2 | 17.9  | 19.3  | 18.3 | 20.5  | 22.8 | 22.0  |
| Lyrm7    | 1.0   | 0.9  | 1.0  | 1.4    | 0.7    | 1.5  | 1.0   | 0.9   | 0.7  | 1.0   | 1.1  | 0.9   |
| Lyrm9    | 1.8   | 1.3  | 0.7  | 1.9    | 1.3    | 2.0  | 0.8   | 0.8   | 0.7  | 0.9   | 1.2  | 1.0   |
| Lysmd1   | 4.8   | 4.4  | 4.3  | 4.7    | 4.0    | 4.4  | 3.7   | 3.8   | 3.5  | 4.2   | 4.3  | 3.7   |
| Lysmd2   | 7.2   | 7.2  | 8.5  | 7.4    | 5.5    | 8.0  | 6.4   | 7.6   | 7.3  | 6.1   | 5.0  | 6.9   |
| Lysmd3   | 4.7   | 6.0  | 7.3  | 6.1    | 5.6    | 4.4  | 6.1   | 7.3   | 6.8  | 6.9   | 8.8  | 7.9   |
| Lysmd4   | 3.8   | 4.1  | 4.3  | 4.0    | 3.5    | 4.1  | 3.6   | 4.4   | 4.3  | 3.9   | 4.2  | 3.8   |
| Lyst     | 6.3   | 7.7  | 6.2  | 5.2    | 6.6    | 5.2  | 5.2   | 5.5   | 7.4  | 7.5   | 6.1  | 9.7   |
| Lyve1    | 0.0   | 0.1  | 0.0  | 0.1    | 0.0    | 0.2  | 0.0   | 0.0   | 0.0  | 0.1   | 0.2  | 0.1   |
| Lyz1     | 5.7   | 6.1  | 5.0  | 31.3   | 62.9   | 5.6  | 6.5   | 3.3   | 4.1  | 5.9   | 3.9  | 5.3   |
| Lyz2     | 269.3 | 62.0 | 60.2 | 1261.6 | 2077.8 | 62.4 | 216.6 | 86.4  | 72.6 | 166.1 | 94.0 | 147.1 |

Online Table 1

|             |        |        |        |        |        |        |        |        |        |        |        |        |
|-------------|--------|--------|--------|--------|--------|--------|--------|--------|--------|--------|--------|--------|
| Lyzl4       | 0.0    | 0.0    | 0.0    | 0.1    | 0.2    | 0.0    | 0.0    | 0.0    | 0.0    | 0.0    | 0.0    | 0.0    |
| Lzic        | 18.4   | 16.9   | 15.6   | 14.0   | 14.4   | 16.7   | 13.5   | 11.6   | 15.6   | 17.4   | 14.5   | 13.5   |
| Lztlf1      | 9.6    | 10.2   | 10.6   | 10.9   | 10.0   | 12.5   | 9.0    | 10.0   | 9.0    | 10.7   | 12.8   | 12.2   |
| Lztr1       | 24.3   | 20.9   | 19.8   | 24.1   | 22.3   | 27.9   | 20.5   | 22.8   | 23.8   | 25.5   | 23.0   | 21.3   |
| Lzts1       | 0.4    | 0.3    | 0.7    | 0.3    | 0.2    | 0.2    | 0.1    | 0.2    | 0.1    | 0.2    | 0.1    | 0.3    |
| Lzts2       | 24.0   | 29.8   | 26.7   | 19.5   | 19.9   | 23.9   | 25.2   | 32.1   | 32.8   | 26.9   | 25.1   | 24.0   |
| M1ap        | 0.4    | 0.4    | 0.4    | 0.2    | 0.5    | 0.1    | 0.5    | 0.3    | 0.4    | 0.4    | 0.3    | 0.6    |
| M6pr        | 77.4   | 72.4   | 70.4   | 97.4   | 96.3   | 80.1   | 85.3   | 59.4   | 76.5   | 76.4   | 79.1   | 73.4   |
| Maats1      | 0.2    | 0.0    | 0.1    | 0.1    | 0.0    | 0.1    | 0.0    | 0.0    | 0.0    | 0.1    | 0.2    | 0.0    |
| Mab21I1     | 0.1    | 0.3    | 0.1    | 0.1    | 0.2    | 0.3    | 0.2    | 0.2    | 0.2    | 0.1    | 0.2    | 0.1    |
| Mab21I2     | 0.0    | 0.0    | 0.0    | 0.0    | 0.0    | 0.0    | 0.0    | 0.0    | 0.0    | 0.0    | 0.0    | 0.0    |
| Mab21I3     | 2.8    | 2.0    | 1.7    | 0.7    | 1.5    | 1.1    | 1.1    | 0.7    | 0.9    | 3.6    | 2.4    | 1.4    |
| Macc1       | 0.0    | 0.1    | 0.1    | 0.1    | 0.1    | 0.0    | 0.1    | 0.0    | 0.1    | 0.1    | 0.1    | 0.1    |
| Macf1       | 46.6   | 44.3   | 38.1   | 43.7   | 43.1   | 40.8   | 47.2   | 43.6   | 42.4   | 36.5   | 45.6   | 41.4   |
| Macro1      | 2.2    | 2.1    | 2.9    | 2.2    | 1.7    | 2.6    | 2.2    | 3.0    | 2.2    | 2.3    | 1.5    | 2.2    |
| Macro2      | 0.5    | 0.3    | 0.4    | 0.9    | 0.3    | 0.5    | 0.6    | 0.3    | 0.3    | 0.3    | 0.4    | 0.5    |
| Mad1I1      | 5.9    | 7.3    | 8.1    | 6.0    | 6.8    | 5.9    | 8.4    | 9.1    | 6.4    | 5.9    | 6.7    | 6.3    |
| Mad2I1      | 4.8    | 7.1    | 12.1   | 3.2    | 9.4    | 3.5    | 10.6   | 6.5    | 9.0    | 6.4    | 8.9    | 6.8    |
| Mad2I1bp    | 5.1    | 4.8    | 5.0    | 4.7    | 6.6    | 4.0    | 5.1    | 5.2    | 6.6    | 5.5    | 5.0    | 5.9    |
| Mad2I2      | 4.3    | 4.5    | 4.4    | 4.8    | 3.7    | 4.2    | 2.8    | 4.5    | 3.6    | 3.4    | 2.9    | 3.0    |
| Madcam1     | 0.0    | 0.1    | 0.0    | 0.2    | 0.0    | 0.1    | 0.0    | 0.0    | 0.0    | 0.0    | 0.0    | 0.0    |
| Madd        | 1.0    | 1.0    | 0.6    | 1.9    | 2.6    | 1.0    | 1.2    | 0.8    | 0.9    | 1.1    | 1.0    | 0.9    |
| Maea        | 87.2   | 91.0   | 77.0   | 82.4   | 80.4   | 86.2   | 100.1  | 91.6   | 97.6   | 82.3   | 90.3   | 81.3   |
| Mael        | 0.1    | 0.0    | 0.1    | 0.0    | 0.0    | 0.1    | 0.0    | 0.0    | 0.0    | 0.1    | 0.2    | 0.0    |
| Maf         | 1.5    | 1.0    | 1.4    | 3.3    | 2.8    | 1.8    | 1.3    | 1.5    | 1.9    | 11.0   | 6.1    | 4.8    |
| Maf1        | 22.9   | 22.9   | 19.6   | 21.8   | 21.7   | 24.0   | 20.0   | 22.4   | 22.8   | 24.5   | 20.4   | 20.4   |
| Mafa        | 0.1    | 0.0    | 0.0    | 0.3    | 0.1    | 0.1    | 0.2    | 0.1    | 0.0    | 0.2    | 0.0    | 0.3    |
| Mafb        | 0.2    | 0.2    | 0.3    | 2.0    | 3.3    | 0.2    | 0.4    | 0.3    | 0.3    | 0.5    | 0.5    | 0.4    |
| Maff        | 76.1   | 44.8   | 29.1   | 103.3  | 42.4   | 79.7   | 40.4   | 19.6   | 19.5   | 31.2   | 35.0   | 32.0   |
| Mafg        | 8.0    | 7.6    | 7.0    | 11.8   | 11.2   | 10.0   | 9.3    | 6.3    | 7.4    | 9.0    | 8.7    | 7.5    |
| Mafk        | 57.1   | 52.0   | 34.8   | 71.4   | 44.3   | 52.3   | 54.4   | 29.8   | 37.2   | 38.1   | 50.6   | 36.8   |
| Mag         | 0.1    | 0.0    | 0.0    | 0.2    | 0.1    | 0.0    | 0.0    | 0.0    | 0.0    | 0.0    | 0.0    | 0.0    |
| Mageb16     | 0.0    | 0.0    | 0.0    | 0.1    | 0.0    | 0.0    | 0.0    | 0.0    | 0.0    | 0.0    | 0.0    | 0.0    |
| Mageb16-ps1 | 0.0    | 0.0    | 0.0    | 0.0    | 0.0    | 0.0    | 0.1    | 0.0    | 0.0    | 0.0    | 0.0    | 0.0    |
| Maged1      | 165.0  | 174.2  | 188.2  | 151.2  | 150.8  | 151.3  | 165.8  | 213.9  | 180.4  | 191.0  | 184.0  | 181.8  |
| Maged2      | 46.5   | 48.6   | 49.0   | 41.1   | 44.8   | 40.6   | 46.7   | 62.1   | 63.3   | 50.8   | 48.4   | 50.5   |
| Magee1      | 8.5    | 9.4    | 8.7    | 6.9    | 7.3    | 7.3    | 8.9    | 6.7    | 8.2    | 8.0    | 7.6    | 8.7    |
| Magee2      | 0.1    | 0.1    | 0.1    | 0.1    | 0.0    | 0.0    | 0.0    | 0.0    | 0.0    | 0.0    | 0.0    | 0.0    |
| Mageh1      | 6.5    | 4.4    | 4.4    | 7.5    | 5.4    | 7.4    | 5.8    | 4.7    | 4.7    | 6.1    | 5.6    | 5.5    |
| Magi1       | 3.0    | 4.1    | 5.5    | 3.5    | 3.4    | 3.3    | 5.1    | 6.6    | 7.0    | 3.5    | 5.1    | 4.9    |
| Magi2       | 0.9    | 0.9    | 0.9    | 0.9    | 0.6    | 1.0    | 1.0    | 0.7    | 0.8    | 0.7    | 0.9    | 1.0    |
| Magi3       | 15.2   | 15.5   | 13.7   | 14.8   | 11.3   | 10.6   | 12.5   | 9.4    | 10.5   | 11.3   | 14.6   | 11.3   |
| Magix       | 0.1    | 0.0    | 0.1    | 0.0    | 0.0    | 0.1    | 0.0    | 0.1    | 0.0    | 0.0    | 0.0    | 0.1    |
| Magoh       | 42.1   | 39.8   | 48.4   | 39.2   | 39.2   | 44.7   | 38.0   | 40.6   | 38.4   | 49.1   | 44.1   | 46.4   |
| Magohb      | 11.9   | 9.5    | 8.2    | 12.5   | 9.7    | 14.6   | 12.1   | 9.9    | 10.5   | 14.0   | 15.2   | 11.2   |
| Magt1       | 36.4   | 35.0   | 30.8   | 41.5   | 35.1   | 37.8   | 35.0   | 31.5   | 34.7   | 35.0   | 43.9   | 39.5   |
| Mak         | 0.0    | 0.0    | 0.0    | 0.1    | 0.0    | 0.0    | 0.0    | 0.0    | 0.0    | 0.0    | 0.0    | 0.0    |
| Mak16       | 38.0   | 29.9   | 29.6   | 34.6   | 32.0   | 28.0   | 31.8   | 25.0   | 22.5   | 33.3   | 36.5   | 33.5   |
| Mal         | 1.1    | 0.6    | 0.5    | 0.7    | 0.3    | 0.3    | 0.7    | 0.6    | 0.2    | 0.3    | 0.6    | 0.5    |
| Mal2        | 0.2    | 0.1    | 0.1    | 0.1    | 0.0    | 0.0    | 0.1    | 0.1    | 0.1    | 0.3    | 0.3    | 0.3    |
| Malat1      | 2420.3 | 3440.8 | 4115.1 | 2466.4 | 2501.0 | 3203.0 | 2968.2 | 3293.6 | 2910.4 | 2853.3 | 2923.0 | 3476.9 |
| Mall        | 0.0    | 0.1    | 0.2    | 0.1    | 0.0    | 0.1    | 0.1    | 0.1    | 0.1    | 0.0    | 0.0    | 0.1    |
| Malsu1      | 14.4   | 12.8   | 14.3   | 13.1   | 13.0   | 14.0   | 12.2   | 15.0   | 12.6   | 15.8   | 14.3   | 13.2   |
| Malt1       | 1.7    | 1.8    | 1.7    | 1.8    | 2.1    | 1.7    | 1.7    | 1.7    | 1.3    | 1.7    | 1.6    | 1.9    |
| Mamdc2      | 0.4    | 0.7    | 1.4    | 0.4    | 0.7    | 0.5    | 1.5    | 2.5    | 4.0    | 1.5    | 1.3    | 2.3    |
| Mamdc4      | 0.1    | 0.1    | 0.2    | 0.1    | 0.2    | 0.1    | 0.2    | 0.2    | 0.2    | 0.1    | 0.1    | 0.1    |
| Maml1       | 2.8    | 3.7    | 3.5    | 3.1    | 3.0    | 3.1    | 3.1    | 3.8    | 3.5    | 3.2    | 3.0    | 3.4    |

Online Table 1



|          |       |       |       |       |       |       |       |       |       |       |       |       |
|----------|-------|-------|-------|-------|-------|-------|-------|-------|-------|-------|-------|-------|
| Mam12    | 7.5   | 10.7  | 10.9  | 8.1   | 7.0   | 9.1   | 8.8   | 10.3  | 8.6   | 6.8   | 8.4   | 8.0   |
| Mam13    | 0.3   | 0.3   | 0.5   | 0.4   | 0.4   | 0.3   | 0.3   | 0.5   | 0.4   | 0.4   | 0.4   | 0.2   |
| Mam1d1   | 1.0   | 1.2   | 1.0   | 1.1   | 0.8   | 1.6   | 1.1   | 1.1   | 0.7   | 0.5   | 0.7   | 0.5   |
| Mamstr   | 0.1   | 0.3   | 0.2   | 0.0   | 0.1   | 0.3   | 0.3   | 0.5   | 0.3   | 0.2   | 0.2   | 0.2   |
| Man1a    | 21.6  | 20.7  | 22.0  | 17.0  | 22.9  | 15.8  | 18.9  | 20.2  | 21.2  | 26.6  | 22.2  | 22.5  |
| Man1a2   | 17.5  | 14.6  | 15.7  | 20.4  | 17.8  | 19.0  | 17.5  | 17.0  | 17.0  | 18.3  | 20.8  | 21.8  |
| Man1b1   | 24.7  | 24.0  | 22.8  | 30.3  | 25.4  | 25.6  | 26.0  | 22.7  | 27.0  | 22.8  | 23.9  | 24.8  |
| Man1c1   | 10.0  | 11.1  | 9.0   | 10.4  | 9.8   | 8.2   | 10.5  | 11.5  | 12.0  | 11.4  | 9.9   | 10.5  |
| Man2a1   | 27.2  | 29.0  | 29.0  | 26.9  | 31.5  | 33.8  | 33.9  | 31.9  | 41.2  | 34.0  | 34.6  | 39.3  |
| Man2a2   | 13.7  | 18.9  | 24.5  | 14.4  | 20.5  | 18.5  | 22.8  | 24.7  | 23.4  | 17.2  | 18.4  | 21.6  |
| Man2b1   | 21.4  | 16.1  | 17.9  | 24.1  | 32.4  | 18.4  | 12.8  | 15.4  | 14.3  | 19.5  | 15.1  | 16.0  |
| Man2b2   | 24.4  | 17.7  | 20.2  | 27.0  | 24.0  | 26.0  | 18.6  | 19.6  | 17.2  | 19.2  | 17.6  | 18.7  |
| Man2c1   | 12.8  | 11.6  | 11.8  | 13.1  | 11.6  | 14.6  | 12.1  | 11.6  | 11.4  | 10.3  | 10.4  | 10.2  |
| Manba    | 13.7  | 14.3  | 15.0  | 9.8   | 14.7  | 13.3  | 10.3  | 17.0  | 14.9  | 13.6  | 12.5  | 13.3  |
| Manbal   | 17.3  | 12.2  | 13.0  | 16.6  | 13.0  | 16.1  | 15.1  | 15.0  | 16.1  | 14.2  | 16.7  | 15.0  |
| Manea    | 12.2  | 11.4  | 12.1  | 14.1  | 10.3  | 13.8  | 11.5  | 10.6  | 10.9  | 10.1  | 13.5  | 12.2  |
| Maneal   | 0.4   | 0.2   | 0.1   | 0.2   | 0.2   | 0.5   | 0.3   | 0.3   | 0.2   | 0.2   | 0.2   | 0.2   |
| Manf     | 77.2  | 60.4  | 54.8  | 74.0  | 60.5  | 53.0  | 72.4  | 71.7  | 67.9  | 71.6  | 78.4  | 72.8  |
| Mansc1   | 0.7   | 1.0   | 1.0   | 0.5   | 0.9   | 1.5   | 0.9   | 0.9   | 0.7   | 0.6   | 0.8   | 0.7   |
| Mansc4   | 0.2   | 0.2   | 0.1   | 0.1   | 0.1   | 0.2   | 0.3   | 0.1   | 0.1   | 0.2   | 0.0   | 0.1   |
| Maoa     | 61.1  | 38.9  | 25.2  | 43.2  | 19.0  | 41.4  | 12.2  | 17.2  | 12.8  | 18.5  | 20.3  | 23.1  |
| Maob     | 14.8  | 16.1  | 17.8  | 14.0  | 13.5  | 13.6  | 15.9  | 13.4  | 13.4  | 9.1   | 12.5  | 16.2  |
| Map1a    | 8.9   | 10.0  | 9.1   | 9.1   | 7.9   | 7.9   | 9.5   | 7.8   | 7.0   | 7.3   | 8.3   | 5.4   |
| Map1b    | 18.5  | 13.1  | 12.0  | 27.2  | 14.8  | 19.2  | 23.4  | 18.8  | 16.2  | 17.4  | 27.1  | 15.1  |
| Map1lc3a | 46.0  | 43.4  | 36.8  | 40.2  | 35.7  | 41.1  | 41.8  | 50.7  | 44.6  | 45.7  | 40.6  | 38.3  |
| Map1lc3b | 149.2 | 128.0 | 102.0 | 159.0 | 129.1 | 155.4 | 117.9 | 117.1 | 117.8 | 140.8 | 131.3 | 135.8 |
| Map1s    | 6.0   | 6.8   | 5.6   | 5.2   | 6.3   | 5.4   | 8.3   | 6.0   | 8.4   | 6.3   | 5.0   | 4.6   |
| Map2     | 7.1   | 5.6   | 6.0   | 8.8   | 7.2   | 7.7   | 8.7   | 9.0   | 13.1  | 4.1   | 13.2  | 9.4   |
| Map2k1   | 57.9  | 57.0  | 45.0  | 56.6  | 56.9  | 54.1  | 56.7  | 46.7  | 55.6  | 55.2  | 56.0  | 53.2  |
| Map2k2   | 33.8  | 29.0  | 22.6  | 31.0  | 28.7  | 32.9  | 29.9  | 31.7  | 30.7  | 30.4  | 27.5  | 24.1  |
| Map2k3   | 23.4  | 31.9  | 25.8  | 22.4  | 29.6  | 19.5  | 27.6  | 27.6  | 27.2  | 29.0  | 24.7  | 21.9  |
| Map2k4   | 16.9  | 16.9  | 14.3  | 14.1  | 14.0  | 13.6  | 14.4  | 13.7  | 14.6  | 15.3  | 15.8  | 14.9  |
| Map2k5   | 6.7   | 6.7   | 6.4   | 6.9   | 6.5   | 7.6   | 6.6   | 7.1   | 6.6   | 6.8   | 6.0   | 7.0   |
| Map2k6   | 0.3   | 0.5   | 0.6   | 0.4   | 0.4   | 0.8   | 0.2   | 0.3   | 0.4   | 0.4   | 0.3   | 0.2   |
| Map2k7   | 13.8  | 11.1  | 8.9   | 15.6  | 11.6  | 12.4  | 12.8  | 9.0   | 9.3   | 11.2  | 12.6  | 9.7   |
| Map3k1   | 1.1   | 1.5   | 1.6   | 1.4   | 1.8   | 0.9   | 1.3   | 1.3   | 1.3   | 1.6   | 1.3   | 1.3   |
| Map3k10  | 6.4   | 6.0   | 5.6   | 5.9   | 5.5   | 5.5   | 5.6   | 5.9   | 5.9   | 6.5   | 4.9   | 5.1   |
| Map3k11  | 5.8   | 5.8   | 4.5   | 5.5   | 6.7   | 5.1   | 5.7   | 4.6   | 5.5   | 6.0   | 5.2   | 4.4   |
| Map3k12  | 3.4   | 4.8   | 4.8   | 3.7   | 3.8   | 4.2   | 3.8   | 3.7   | 4.2   | 4.7   | 3.8   | 4.0   |
| Map3k13  | 0.3   | 0.4   | 0.3   | 0.3   | 0.3   | 0.3   | 0.2   | 0.2   | 0.1   | 0.2   | 0.3   | 0.2   |
| Map3k14  | 3.7   | 3.9   | 3.3   | 4.7   | 5.2   | 3.0   | 4.8   | 4.3   | 3.6   | 3.5   | 3.4   | 3.2   |
| Map3k15  | 0.5   | 0.2   | 0.1   | 0.4   | 0.2   | 0.4   | 0.2   | 0.2   | 0.2   | 0.3   | 0.3   | 0.4   |
| Map3k19  | 0.1   | 0.1   | 0.0   | 0.1   | 0.0   | 0.1   | 0.1   | 0.0   | 0.0   | 0.0   | 0.1   | 0.0   |
| Map3k2   | 3.9   | 4.5   | 4.6   | 4.0   | 4.1   | 4.6   | 3.7   | 4.0   | 3.8   | 4.3   | 4.4   | 4.6   |
| Map3k3   | 19.5  | 22.3  | 23.4  | 18.7  | 22.5  | 18.2  | 24.1  | 21.4  | 25.2  | 19.4  | 21.2  | 21.8  |
| Map3k4   | 7.3   | 7.2   | 6.7   | 6.1   | 6.3   | 7.1   | 5.9   | 5.2   | 5.5   | 5.7   | 5.4   | 5.9   |
| Map3k5   | 1.2   | 3.3   | 4.3   | 1.2   | 2.3   | 0.7   | 1.8   | 1.6   | 1.9   | 1.9   | 1.4   | 2.2   |
| Map3k6   | 2.9   | 3.8   | 3.4   | 3.1   | 4.0   | 2.6   | 5.1   | 4.3   | 4.2   | 3.4   | 4.0   | 3.4   |
| Map3k7   | 18.6  | 17.0  | 15.4  | 18.8  | 16.4  | 18.4  | 17.2  | 14.9  | 15.1  | 15.6  | 17.0  | 16.8  |
| Map3k8   | 3.8   | 4.5   | 5.6   | 3.5   | 4.3   | 2.8   | 3.4   | 4.4   | 3.3   | 2.3   | 2.6   | 3.2   |
| Map3k9   | 0.1   | 0.0   | 0.0   | 0.3   | 0.5   | 0.0   | 0.0   | 0.0   | 0.0   | 0.1   | 0.2   | 0.1   |
| Map4     | 57.5  | 46.9  | 40.3  | 66.0  | 47.7  | 62.5  | 50.6  | 40.2  | 43.2  | 34.6  | 45.5  | 42.1  |
| Map4k1   | 0.5   | 0.6   | 0.5   | 0.4   | 0.7   | 0.3   | 0.4   | 0.2   | 0.3   | 0.3   | 0.1   | 0.3   |
| Map4k2   | 3.3   | 3.5   | 3.1   | 2.2   | 3.8   | 2.8   | 3.8   | 2.5   | 2.7   | 2.6   | 2.9   | 3.0   |
| Map4k3   | 40.2  | 58.8  | 73.2  | 44.3  | 43.3  | 33.4  | 44.8  | 53.0  | 56.0  | 36.7  | 47.3  | 56.8  |
| Map4k4   | 83.9  | 81.3  | 90.5  | 91.1  | 74.6  | 88.3  | 70.0  | 59.5  | 55.4  | 80.2  | 71.4  | 84.5  |
| Map4k5   | 20.5  | 23.8  | 23.3  | 25.3  | 20.1  | 23.8  | 28.9  | 20.9  | 26.6  | 27.4  | 27.0  | 30.6  |

Online Table 1

|              |      |      |      |      |      |      |      |      |      |      |      |      |
|--------------|------|------|------|------|------|------|------|------|------|------|------|------|
| Map6         | 51.3 | 40.7 | 35.4 | 52.7 | 39.4 | 47.8 | 62.7 | 52.6 | 48.5 | 42.1 | 62.7 | 50.1 |
| Map6d1       | 0.1  | 0.1  | 0.2  | 0.1  | 0.1  | 0.2  | 0.1  | 0.2  | 0.1  | 0.1  | 0.1  | 0.1  |
| Map7         | 2.7  | 2.1  | 1.8  | 3.0  | 1.3  | 2.6  | 1.6  | 0.9  | 1.1  | 1.4  | 1.7  | 1.4  |
| Map7d1       | 24.1 | 30.0 | 31.9 | 26.6 | 28.1 | 23.3 | 41.9 | 30.3 | 31.2 | 27.5 | 31.2 | 27.7 |
| Map7d2       | 1.9  | 0.6  | 0.5  | 6.2  | 1.8  | 4.3  | 0.3  | 0.3  | 0.1  | 0.3  | 0.3  | 0.3  |
| Map9         | 1.9  | 2.0  | 1.7  | 2.0  | 1.5  | 2.3  | 2.3  | 1.7  | 1.5  | 1.4  | 2.2  | 2.0  |
| Mapk1        | 43.6 | 39.4 | 40.4 | 40.0 | 40.8 | 39.7 | 40.7 | 39.9 | 38.7 | 39.7 | 44.8 | 45.2 |
| Mapk10       | 0.0  | 0.0  | 0.0  | 0.0  | 0.0  | 0.0  | 0.0  | 0.0  | 0.0  | 0.1  | 0.1  | 0.0  |
| Mapk11       | 3.2  | 3.3  | 2.8  | 4.2  | 3.2  | 4.5  | 4.6  | 2.9  | 3.4  | 2.6  | 3.1  | 2.0  |
| Mapk12       | 3.0  | 2.4  | 2.0  | 2.7  | 2.4  | 4.5  | 2.2  | 2.9  | 2.8  | 1.9  | 1.7  | 1.7  |
| Mapk13       | 5.7  | 1.9  | 1.4  | 2.0  | 1.2  | 3.5  | 0.5  | 0.3  | 0.4  | 2.7  | 1.2  | 2.0  |
| Mapk14       | 20.4 | 22.1 | 20.1 | 18.3 | 23.8 | 17.9 | 20.2 | 18.6 | 20.0 | 18.9 | 20.6 | 19.0 |
| Mapk15       | 0.0  | 0.0  | 0.0  | 0.0  | 0.0  | 0.0  | 0.0  | 0.0  | 0.0  | 0.0  | 0.0  | 0.0  |
| Mapk1ip1     | 3.6  | 3.3  | 3.9  | 5.6  | 2.9  | 5.1  | 3.6  | 3.1  | 3.4  | 4.2  | 4.2  | 4.0  |
| Mapk1ip1l    | 16.0 | 18.7 | 18.4 | 15.9 | 17.7 | 15.9 | 19.5 | 17.8 | 17.9 | 16.6 | 19.5 | 17.2 |
| Mapk3        | 35.5 | 30.6 | 30.6 | 41.7 | 34.6 | 37.1 | 32.2 | 30.0 | 26.1 | 28.5 | 31.5 | 31.1 |
| Mapk4        | 0.1  | 0.1  | 0.0  | 0.0  | 0.0  | 0.1  | 0.0  | 0.0  | 0.1  | 0.2  | 0.1  | 0.0  |
| Mapk6        | 24.9 | 25.0 | 22.9 | 27.3 | 23.9 | 27.7 | 26.6 | 26.9 | 20.2 | 18.0 | 25.2 | 21.3 |
| Mapk7        | 4.3  | 4.9  | 7.7  | 4.5  | 5.5  | 4.4  | 7.8  | 8.6  | 7.0  | 4.2  | 5.5  | 5.2  |
| Mapk8        | 4.0  | 4.2  | 4.0  | 4.0  | 3.6  | 4.0  | 4.0  | 3.6  | 3.8  | 4.1  | 4.3  | 4.2  |
| Mapk8ip1     | 5.2  | 5.5  | 4.6  | 5.1  | 4.3  | 6.4  | 5.4  | 8.8  | 5.1  | 6.6  | 6.3  | 3.9  |
| Mapk8ip2     | 0.0  | 0.0  | 0.0  | 0.0  | 0.0  | 0.0  | 0.0  | 0.0  | 0.0  | 0.0  | 0.0  | 0.0  |
| Mapk8ip3     | 7.6  | 8.6  | 7.6  | 5.7  | 7.1  | 8.5  | 6.9  | 6.1  | 6.9  | 6.7  | 5.9  | 5.9  |
| Mapk9        | 18.9 | 20.2 | 18.8 | 21.5 | 17.6 | 20.4 | 17.4 | 17.4 | 16.5 | 16.0 | 18.6 | 16.9 |
| Mapkap1      | 19.4 | 20.5 | 18.8 | 19.2 | 17.6 | 18.7 | 17.4 | 19.7 | 18.3 | 17.1 | 18.6 | 18.7 |
| Mapkapk2     | 42.4 | 42.9 | 35.4 | 43.1 | 48.1 | 38.2 | 41.2 | 37.2 | 41.8 | 45.3 | 40.1 | 39.3 |
| Mapkapk3     | 5.4  | 5.2  | 4.2  | 5.9  | 9.3  | 4.2  | 4.9  | 3.8  | 4.5  | 7.3  | 6.7  | 5.9  |
| Mapkapk5     | 14.5 | 13.3 | 13.6 | 16.8 | 13.1 | 16.8 | 15.0 | 12.8 | 13.6 | 10.6 | 14.0 | 12.6 |
| Mapkbp1      | 4.1  | 4.2  | 3.7  | 3.3  | 3.8  | 3.4  | 3.7  | 3.3  | 3.3  | 3.4  | 3.7  | 3.3  |
| Mapre1       | 25.4 | 22.0 | 20.4 | 28.1 | 24.2 | 24.7 | 22.8 | 18.6 | 21.0 | 22.5 | 24.5 | 23.8 |
| Mapre2       | 5.8  | 5.5  | 4.7  | 5.6  | 5.5  | 6.4  | 4.0  | 4.6  | 4.2  | 5.4  | 5.6  | 4.2  |
| Mapre3       | 6.0  | 7.0  | 6.2  | 5.6  | 5.8  | 6.9  | 6.2  | 5.4  | 5.6  | 4.9  | 5.8  | 6.0  |
| Mapt         | 0.1  | 0.2  | 0.1  | 0.1  | 0.2  | 0.2  | 0.1  | 0.1  | 0.1  | 0.1  | 0.1  | 0.1  |
| Marcks       | 39.5 | 44.3 | 69.0 | 45.5 | 51.7 | 41.3 | 59.3 | 76.7 | 72.2 | 62.2 | 61.9 | 71.4 |
| Marcksl1     | 34.3 | 47.6 | 65.1 | 31.7 | 71.4 | 26.6 | 64.9 | 59.4 | 62.5 | 76.9 | 61.0 | 69.2 |
| Marcksl1-ps4 | 0.0  | 0.0  | 0.0  | 0.0  | 0.0  | 0.0  | 0.0  | 0.0  | 0.0  | 0.0  | 0.0  | 0.1  |
| Marco        | 0.3  | 0.0  | 0.0  | 0.3  | 2.1  | 0.0  | 0.3  | 0.0  | 0.0  | 0.0  | 0.0  | 0.1  |
| Marf1        | 16.4 | 20.1 | 18.1 | 15.7 | 17.8 | 14.9 | 15.3 | 15.4 | 16.0 | 14.7 | 16.0 | 15.2 |
| Mark1        | 6.7  | 9.3  | 8.4  | 6.8  | 6.9  | 7.2  | 7.4  | 5.1  | 7.0  | 7.5  | 7.1  | 7.1  |
| Mark2        | 4.1  | 4.9  | 4.6  | 4.4  | 5.2  | 3.9  | 4.9  | 4.9  | 5.3  | 5.4  | 4.7  | 4.1  |
| Mark3        | 19.7 | 22.2 | 20.2 | 19.9 | 18.6 | 20.3 | 18.4 | 21.5 | 21.3 | 21.5 | 22.6 | 21.5 |
| Mark4        | 4.8  | 5.5  | 5.4  | 4.1  | 4.5  | 4.3  | 5.9  | 4.8  | 5.5  | 4.9  | 4.9  | 5.5  |
| Mars         | 33.0 | 27.1 | 23.8 | 28.1 | 25.5 | 29.6 | 28.4 | 31.7 | 27.4 | 21.9 | 26.5 | 22.8 |
| Mars2        | 2.1  | 1.9  | 2.0  | 2.5  | 2.8  | 1.8  | 2.4  | 1.8  | 2.4  | 1.9  | 1.8  | 2.3  |
| Marveld1     | 14.1 | 16.0 | 14.6 | 14.7 | 16.2 | 18.1 | 15.0 | 17.6 | 19.1 | 15.7 | 13.7 | 13.0 |
| Marveld2     | 0.0  | 0.0  | 0.0  | 0.0  | 0.0  | 0.0  | 0.0  | 0.0  | 0.0  | 0.0  | 0.0  | 0.0  |
| Mas1         | 0.0  | 0.0  | 0.1  | 0.0  | 0.0  | 0.0  | 0.1  | 0.0  | 0.0  | 0.0  | 0.0  | 0.0  |
| Masp1        | 0.9  | 0.4  | 0.2  | 1.4  | 0.4  | 0.7  | 0.3  | 0.1  | 0.4  | 0.5  | 0.3  | 0.4  |
| Masp2        | 0.2  | 0.4  | 0.3  | 0.0  | 0.2  | 0.5  | 0.2  | 0.3  | 0.1  | 0.1  | 0.2  | 0.1  |
| Mast1        | 0.0  | 0.1  | 0.1  | 0.1  | 0.1  | 0.1  | 0.0  | 0.1  | 0.0  | 0.1  | 0.1  | 0.1  |
| Mast2        | 19.6 | 16.7 | 12.3 | 17.1 | 15.0 | 17.5 | 17.2 | 11.4 | 14.1 | 15.1 | 16.7 | 12.4 |
| Mast3        | 1.7  | 2.2  | 2.1  | 2.0  | 2.8  | 1.8  | 2.1  | 1.4  | 1.9  | 2.0  | 1.6  | 1.4  |
| Mast4        | 1.9  | 2.9  | 3.8  | 1.6  | 2.6  | 1.6  | 3.3  | 3.4  | 3.2  | 4.7  | 3.5  | 3.9  |
| Mastl        | 1.6  | 3.5  | 5.0  | 1.0  | 4.3  | 1.1  | 5.1  | 1.8  | 3.4  | 1.6  | 3.2  | 2.3  |
| Mat1a        | 0.0  | 0.0  | 0.1  | 0.0  | 0.0  | 0.0  | 0.0  | 0.0  | 0.0  | 0.0  | 0.0  | 0.0  |
| Mat2a        | 32.4 | 32.3 | 26.9 | 30.2 | 34.7 | 30.1 | 31.4 | 33.0 | 36.7 | 35.7 | 34.4 | 28.0 |
| Mat2b        | 25.7 | 27.1 | 24.6 | 25.6 | 27.7 | 22.4 | 23.9 | 25.5 | 28.7 | 29.0 | 28.0 | 27.4 |

Online Table 1

|         |       |       |       |       |       |       |       |       |       |       |       |       |
|---------|-------|-------|-------|-------|-------|-------|-------|-------|-------|-------|-------|-------|
| Matk    | 0.1   | 0.1   | 0.1   | 0.2   | 0.3   | 0.0   | 0.2   | 0.0   | 0.2   | 0.3   | 0.2   | 0.1   |
| Matn2   | 5.9   | 10.6  | 25.6  | 4.5   | 11.6  | 6.8   | 13.9  | 51.8  | 22.1  | 10.2  | 11.9  | 14.9  |
| Matn3   | 0.1   | 0.2   | 0.3   | 0.0   | 0.2   | 0.1   | 0.1   | 0.1   | 0.5   | 0.1   | 0.3   | 0.3   |
| Matn4   | 0.9   | 1.9   | 2.9   | 1.0   | 2.3   | 1.8   | 2.2   | 5.4   | 4.9   | 2.5   | 1.5   | 3.2   |
| Matr3   | 34.4  | 33.0  | 38.1  | 34.4  | 31.4  | 33.8  | 34.2  | 38.4  | 35.6  | 47.9  | 44.4  | 48.6  |
| Mau2    | 10.0  | 11.1  | 9.4   | 9.0   | 10.6  | 8.6   | 9.4   | 9.8   | 11.0  | 10.5  | 10.1  | 8.9   |
| Mavs    | 11.4  | 11.7  | 10.8  | 12.0  | 10.0  | 13.3  | 10.8  | 9.5   | 9.7   | 10.4  | 10.5  | 9.5   |
| Max     | 19.3  | 19.1  | 19.8  | 26.1  | 21.4  | 20.4  | 24.6  | 21.2  | 17.2  | 17.2  | 22.6  | 21.3  |
| Maz     | 13.0  | 14.2  | 16.8  | 13.4  | 13.4  | 13.9  | 14.8  | 21.8  | 16.5  | 13.5  | 15.8  | 12.9  |
| Mb21d1  | 0.7   | 1.0   | 1.3   | 0.5   | 1.2   | 0.3   | 1.2   | 0.7   | 1.0   | 0.7   | 1.1   | 1.0   |
| Mb21d2  | 1.4   | 1.0   | 1.0   | 1.5   | 1.2   | 1.8   | 1.0   | 1.2   | 1.0   | 1.6   | 1.3   | 0.9   |
| Mbd1    | 7.4   | 6.9   | 7.0   | 8.4   | 9.2   | 6.1   | 9.0   | 7.2   | 10.5  | 11.3  | 10.4  | 13.9  |
| Mbd2    | 38.9  | 39.5  | 40.3  | 49.5  | 36.9  | 42.7  | 41.1  | 31.9  | 35.9  | 35.1  | 40.1  | 42.4  |
| Mbd3    | 12.9  | 12.0  | 11.2  | 14.3  | 13.5  | 14.1  | 14.1  | 13.9  | 12.7  | 15.4  | 13.2  | 13.1  |
| Mbd4    | 0.4   | 1.1   | 1.4   | 0.5   | 0.9   | 0.6   | 0.9   | 1.0   | 0.9   | 0.8   | 0.7   | 0.8   |
| Mbd5    | 2.8   | 3.0   | 3.4   | 2.6   | 2.6   | 2.7   | 2.6   | 3.0   | 2.4   | 2.4   | 2.8   | 2.7   |
| Mbd6    | 0.4   | 0.5   | 0.6   | 0.4   | 0.6   | 0.4   | 0.5   | 0.7   | 0.7   | 0.5   | 0.5   | 0.5   |
| Mbip    | 6.2   | 6.6   | 7.2   | 5.3   | 6.2   | 5.2   | 5.7   | 6.1   | 6.7   | 7.3   | 6.8   | 7.3   |
| Mblac1  | 1.3   | 0.9   | 0.6   | 0.6   | 1.1   | 0.7   | 1.0   | 1.3   | 1.0   | 1.4   | 1.5   | 0.6   |
| Mblac2  | 1.5   | 1.7   | 1.8   | 2.1   | 1.2   | 2.6   | 1.1   | 1.6   | 1.3   | 1.3   | 1.8   | 1.6   |
| Mbnl1   | 52.3  | 56.0  | 65.2  | 87.6  | 64.3  | 80.8  | 65.1  | 60.7  | 56.0  | 51.5  | 76.0  | 61.7  |
| Mbnl2   | 74.1  | 79.5  | 80.3  | 93.6  | 69.8  | 89.3  | 79.8  | 66.4  | 66.9  | 66.4  | 88.5  | 83.5  |
| Mbnl3   | 0.7   | 0.7   | 0.8   | 1.3   | 0.9   | 0.6   | 0.8   | 0.7   | 1.1   | 0.6   | 0.8   | 0.7   |
| Mboat1  | 1.3   | 2.0   | 2.7   | 0.8   | 1.6   | 0.9   | 1.4   | 1.7   | 1.4   | 1.0   | 1.0   | 0.9   |
| Mboat2  | 2.2   | 3.4   | 3.2   | 1.8   | 2.6   | 1.5   | 2.1   | 2.7   | 2.8   | 2.0   | 1.8   | 2.5   |
| Mboat4  | 0.1   | 0.1   | 0.0   | 0.1   | 0.0   | 0.0   | 0.0   | 0.0   | 0.1   | 0.2   | 0.0   | 0.1   |
| Mboat7  | 11.0  | 12.9  | 10.3  | 8.9   | 11.5  | 9.2   | 13.2  | 8.7   | 11.5  | 17.4  | 12.7  | 10.4  |
| Mbp     | 2.5   | 3.5   | 3.4   | 1.9   | 2.6   | 2.0   | 0.9   | 3.3   | 1.6   | 11.9  | 7.1   | 3.7   |
| Mbtd1   | 1.8   | 2.5   | 2.6   | 1.7   | 2.4   | 1.9   | 2.2   | 2.2   | 2.7   | 2.5   | 2.7   | 2.3   |
| Mbtps1  | 38.8  | 36.1  | 37.8  | 41.5  | 40.0  | 41.2  | 43.0  | 43.7  | 40.7  | 39.8  | 39.7  | 41.6  |
| Mbtps2  | 2.8   | 3.2   | 2.6   | 2.4   | 2.6   | 3.4   | 2.3   | 2.9   | 2.6   | 2.7   | 2.7   | 2.5   |
| Mc1r    | 0.1   | 0.1   | 0.1   | 0.1   | 0.1   | 0.1   | 0.2   | 0.2   | 0.1   | 0.1   | 0.1   | 0.0   |
| Mc2r    | 0.0   | 0.0   | 0.1   | 0.1   | 0.0   | 0.0   | 0.0   | 0.0   | 0.0   | 0.0   | 0.0   | 0.0   |
| Mc5r    | 0.0   | 0.0   | 0.0   | 0.0   | 0.0   | 0.0   | 0.1   | 0.0   | 0.0   | 0.1   | 0.1   | 0.1   |
| Mcam    | 3.9   | 1.2   | 1.5   | 3.6   | 2.3   | 3.7   | 3.3   | 3.7   | 4.2   | 4.9   | 4.9   | 2.5   |
| Mcat    | 7.6   | 7.1   | 5.1   | 5.9   | 5.9   | 5.6   | 5.8   | 5.8   | 5.5   | 7.5   | 5.6   | 5.2   |
| Mcc     | 3.8   | 3.7   | 3.5   | 4.1   | 3.3   | 4.4   | 3.0   | 3.5   | 2.0   | 2.4   | 2.6   | 1.9   |
| Mccc1   | 4.8   | 4.3   | 4.7   | 5.2   | 4.8   | 5.4   | 3.8   | 4.8   | 3.7   | 5.1   | 3.5   | 4.9   |
| Mccc2   | 6.8   | 7.5   | 7.9   | 5.3   | 5.4   | 9.1   | 6.7   | 7.7   | 7.3   | 7.6   | 8.3   | 8.5   |
| Mcee    | 19.3  | 15.0  | 15.8  | 19.5  | 16.5  | 18.3  | 16.1  | 13.9  | 14.2  | 18.2  | 17.8  | 16.7  |
| Mcf2l   | 0.1   | 0.2   | 0.0   | 0.2   | 0.1   | 0.3   | 0.2   | 0.1   | 0.2   | 0.2   | 0.1   | 0.1   |
| Mcfd2   | 327.9 | 291.0 | 250.9 | 304.3 | 280.5 | 264.2 | 290.0 | 204.7 | 253.3 | 263.0 | 283.6 | 333.0 |
| Mchr1   | 0.0   | 0.0   | 0.0   | 0.0   | 0.0   | 0.0   | 0.0   | 0.0   | 0.0   | 0.0   | 0.1   | 0.0   |
| Mcl1    | 43.7  | 41.0  | 43.9  | 42.6  | 47.1  | 39.3  | 43.5  | 44.1  | 41.7  | 50.5  | 45.5  | 48.8  |
| Mcm10   | 0.6   | 1.3   | 2.2   | 0.5   | 2.2   | 0.4   | 2.6   | 1.4   | 1.9   | 0.9   | 1.9   | 1.1   |
| Mcm2    | 4.7   | 6.3   | 7.4   | 4.7   | 8.2   | 4.6   | 9.4   | 6.3   | 7.1   | 5.7   | 6.1   | 4.9   |
| Mcm3    | 5.0   | 7.4   | 10.2  | 3.7   | 10.7  | 3.2   | 11.8  | 7.0   | 7.9   | 5.0   | 6.7   | 5.4   |
| Mcm3ap  | 7.2   | 8.9   | 8.6   | 7.8   | 8.9   | 8.0   | 8.9   | 9.0   | 8.6   | 8.5   | 8.1   | 8.1   |
| Mcm4    | 6.4   | 10.4  | 12.8  | 5.1   | 12.1  | 4.7   | 12.5  | 9.4   | 10.8  | 8.0   | 11.4  | 8.3   |
| Mcm5    | 2.7   | 4.3   | 6.0   | 1.7   | 6.8   | 1.1   | 7.0   | 4.4   | 5.3   | 3.2   | 4.7   | 3.4   |
| Mcm6    | 6.6   | 9.9   | 13.9  | 6.1   | 14.8  | 3.9   | 14.5  | 10.9  | 11.0  | 8.4   | 9.8   | 7.4   |
| Mcm7    | 8.8   | 10.3  | 13.0  | 6.2   | 13.0  | 6.1   | 15.0  | 9.7   | 12.3  | 10.3  | 12.4  | 10.0  |
| Mcm8    | 1.1   | 1.6   | 1.8   | 0.8   | 1.5   | 1.0   | 1.7   | 1.5   | 1.2   | 1.0   | 1.3   | 1.2   |
| Mcm9    | 0.8   | 0.9   | 1.0   | 0.9   | 1.3   | 0.8   | 1.0   | 1.0   | 0.8   | 1.0   | 0.7   | 0.8   |
| Mcmbp   | 8.9   | 9.7   | 8.8   | 8.2   | 9.7   | 7.3   | 9.4   | 8.9   | 10.6  | 10.6  | 10.9  | 8.9   |
| Mcmcdc2 | 0.5   | 0.4   | 0.4   | 0.2   | 0.5   | 0.3   | 0.6   | 0.4   | 0.3   | 0.3   | 0.3   | 0.5   |
| Mcoln1  | 15.4  | 14.6  | 12.9  | 18.4  | 13.9  | 20.0  | 16.1  | 14.3  | 14.8  | 13.3  | 13.6  | 14.0  |

Online Table 1

|        |       |      |      |       |      |      |      |      |      |       |       |      |
|--------|-------|------|------|-------|------|------|------|------|------|-------|-------|------|
| Mcoln2 | 0.5   | 0.2  | 0.3  | 3.3   | 3.0  | 0.3  | 0.3  | 0.1  | 0.2  | 0.6   | 0.3   | 0.3  |
| Mcph1  | 2.7   | 3.4  | 3.3  | 2.7   | 3.0  | 3.4  | 3.4  | 3.0  | 3.1  | 2.8   | 3.2   | 3.2  |
| Mcpt4  | 0.1   | 0.0  | 0.2  | 0.0   | 0.1  | 0.0  | 0.1  | 0.0  | 0.2  | 0.1   | 0.1   | 0.2  |
| Mcpt8  | 0.0   | 0.0  | 0.2  | 0.0   | 0.0  | 0.0  | 0.0  | 0.0  | 0.0  | 0.1   | 0.0   | 0.2  |
| Mcrs1  | 6.8   | 7.1  | 6.2  | 7.9   | 8.1  | 7.3  | 8.0  | 8.3  | 9.7  | 9.3   | 9.0   | 7.8  |
| Mctp1  | 0.2   | 0.0  | 0.0  | 1.7   | 2.4  | 0.1  | 0.2  | 0.0  | 0.0  | 0.2   | 0.1   | 0.2  |
| Mctp2  | 0.2   | 0.3  | 0.3  | 0.1   | 0.1  | 0.1  | 0.1  | 0.1  | 0.1  | 0.1   | 0.1   | 0.1  |
| Mcts1  | 32.0  | 32.1 | 25.8 | 30.2  | 30.1 | 33.2 | 20.0 | 23.0 | 26.5 | 33.1  | 27.0  | 25.8 |
| Mcts2  | 6.7   | 7.1  | 5.7  | 5.3   | 7.2  | 6.9  | 7.3  | 8.3  | 6.6  | 7.1   | 8.6   | 6.7  |
| Mcu    | 8.1   | 8.0  | 8.4  | 8.0   | 6.9  | 8.4  | 8.3  | 8.5  | 8.3  | 6.9   | 7.0   | 7.2  |
| Mdc1   | 1.7   | 3.0  | 4.2  | 1.9   | 3.2  | 1.7  | 4.2  | 3.1  | 3.0  | 2.1   | 2.9   | 2.5  |
| Mdfi   | 2.4   | 2.8  | 3.3  | 1.5   | 2.5  | 1.5  | 2.2  | 2.9  | 3.1  | 2.9   | 2.0   | 2.8  |
| Mdfic  | 21.3  | 26.5 | 33.0 | 25.1  | 24.7 | 23.1 | 27.4 | 29.3 | 32.6 | 20.3  | 27.1  | 31.8 |
| Mdga1  | 0.5   | 0.5  | 0.7  | 0.5   | 0.9  | 0.7  | 1.3  | 0.9  | 1.0  | 1.0   | 0.9   | 0.9  |
| Mdga2  | 0.0   | 0.0  | 0.0  | 0.0   | 0.0  | 0.0  | 0.0  | 0.0  | 0.0  | 0.0   | 0.0   | 0.0  |
| Mdh1   | 70.6  | 68.8 | 61.1 | 64.7  | 58.9 | 63.8 | 52.7 | 57.6 | 53.0 | 64.9  | 56.8  | 57.0 |
| Mdh1b  | 0.1   | 0.0  | 0.1  | 0.1   | 0.0  | 0.1  | 0.0  | 0.0  | 0.0  | 0.0   | 0.0   | 0.0  |
| Mdh2   | 104.5 | 93.2 | 81.0 | 101.7 | 98.7 | 96.2 | 98.0 | 95.7 | 83.3 | 100.6 | 100.9 | 88.2 |
| Mdk    | 3.9   | 5.8  | 8.9  | 0.8   | 2.2  | 2.0  | 2.6  | 5.1  | 3.6  | 8.3   | 5.6   | 6.8  |
| Mdm1   | 1.2   | 1.8  | 1.8  | 1.2   | 1.5  | 1.5  | 1.7  | 1.0  | 1.2  | 1.2   | 1.9   | 1.3  |
| Mdm2   | 79.6  | 77.4 | 63.3 | 74.1  | 85.8 | 71.2 | 69.6 | 36.3 | 53.2 | 85.2  | 76.8  | 70.0 |
| Mdm4   | 6.1   | 7.8  | 10.7 | 5.5   | 7.0  | 5.0  | 6.6  | 7.9  | 7.1  | 6.6   | 6.8   | 7.1  |
| Mdn1   | 4.6   | 4.1  | 3.3  | 4.8   | 5.0  | 4.2  | 4.3  | 3.5  | 3.1  | 4.5   | 4.0   | 3.6  |
| Mdp1   | 14.7  | 12.5 | 12.8 | 15.0  | 11.3 | 14.0 | 14.7 | 13.8 | 14.6 | 13.0  | 13.9  | 16.3 |
| Me1    | 38.8  | 37.5 | 34.4 | 40.8  | 35.9 | 42.6 | 36.2 | 38.1 | 33.2 | 31.8  | 41.7  | 35.1 |
| Me2    | 14.9  | 11.4 | 10.8 | 13.3  | 12.4 | 13.4 | 13.1 | 11.3 | 11.8 | 15.1  | 13.5  | 12.7 |
| Me3    | 1.6   | 0.9  | 0.3  | 0.7   | 0.5  | 1.1  | 0.5  | 0.4  | 0.6  | 0.7   | 0.8   | 0.5  |
| Mea1   | 60.6  | 53.0 | 53.3 | 75.1  | 52.8 | 68.5 | 65.1 | 62.3 | 52.9 | 58.8  | 70.2  | 65.1 |
| Meaf6  | 4.3   | 4.6  | 6.6  | 5.3   | 6.6  | 3.5  | 6.0  | 6.0  | 7.1  | 6.0   | 7.1   | 7.9  |
| Mecom  | 2.5   | 2.3  | 3.4  | 1.3   | 1.7  | 0.8  | 1.9  | 3.6  | 2.6  | 1.5   | 1.4   | 2.8  |
| Mecp2  | 2.3   | 2.6  | 2.6  | 2.5   | 2.6  | 2.5  | 2.4  | 2.6  | 2.2  | 2.2   | 2.2   | 2.3  |
| Mecr   | 12.4  | 10.0 | 7.5  | 11.9  | 11.9 | 10.0 | 9.9  | 9.7  | 7.9  | 7.7   | 7.8   | 7.3  |
| Med1   | 11.6  | 13.3 | 13.9 | 13.2  | 12.5 | 11.2 | 13.3 | 14.1 | 13.6 | 11.8  | 12.8  | 12.3 |
| Med10  | 27.3  | 27.1 | 25.9 | 32.0  | 25.8 | 27.1 | 30.8 | 30.8 | 24.8 | 32.0  | 31.4  | 27.0 |
| Med11  | 8.9   | 8.2  | 8.8  | 11.6  | 11.4 | 9.3  | 10.3 | 10.4 | 10.0 | 11.3  | 10.2  | 9.7  |
| Med12  | 3.3   | 3.9  | 4.5  | 3.3   | 4.2  | 3.4  | 4.6  | 4.9  | 4.2  | 3.2   | 3.6   | 3.4  |
| Med12l | 0.1   | 0.0  | 0.0  | 0.1   | 0.0  | 0.1  | 0.0  | 0.0  | 0.0  | 0.0   | 0.0   | 0.0  |
| Med13  | 5.7   | 7.4  | 7.4  | 5.7   | 5.9  | 6.0  | 5.3  | 6.9  | 5.8  | 6.3   | 6.5   | 6.2  |
| Med13l | 4.9   | 7.0  | 8.2  | 5.1   | 6.4  | 5.9  | 7.0  | 7.6  | 7.7  | 6.7   | 7.1   | 6.5  |
| Med14  | 7.0   | 8.8  | 9.8  | 6.8   | 8.3  | 6.5  | 10.3 | 10.4 | 9.2  | 6.7   | 8.0   | 8.1  |
| Med15  | 5.0   | 5.9  | 7.1  | 6.6   | 7.4  | 5.3  | 8.0  | 7.1  | 6.6  | 5.5   | 6.3   | 5.3  |
| Med16  | 4.3   | 4.4  | 3.9  | 5.0   | 5.1  | 5.0  | 5.9  | 5.4  | 5.3  | 4.9   | 4.6   | 4.2  |
| Med17  | 7.0   | 7.5  | 5.6  | 6.8   | 6.3  | 7.5  | 6.7  | 6.0  | 5.8  | 6.5   | 6.4   | 7.1  |
| Med18  | 3.0   | 2.7  | 2.7  | 2.2   | 3.6  | 2.4  | 3.1  | 2.8  | 2.7  | 2.5   | 2.9   | 2.0  |
| Med19  | 9.2   | 9.7  | 9.6  | 11.5  | 8.3  | 10.4 | 8.1  | 9.1  | 7.1  | 8.0   | 9.7   | 9.6  |
| Med20  | 11.3  | 9.4  | 9.7  | 15.0  | 11.4 | 12.4 | 12.4 | 11.5 | 11.7 | 11.0  | 10.8  | 10.3 |
| Med21  | 39.2  | 40.2 | 31.8 | 46.6  | 36.5 | 43.9 | 34.7 | 38.0 | 39.1 | 38.2  | 47.1  | 34.1 |
| Med22  | 10.9  | 9.5  | 8.4  | 10.2  | 10.1 | 9.6  | 9.8  | 10.1 | 10.9 | 11.8  | 10.2  | 8.6  |
| Med23  | 6.4   | 7.4  | 6.9  | 6.0   | 6.5  | 7.1  | 6.6  | 7.4  | 7.0  | 6.8   | 7.0   | 6.5  |
| Med24  | 8.1   | 9.0  | 9.6  | 9.1   | 8.7  | 8.5  | 8.4  | 8.8  | 8.1  | 7.0   | 7.9   | 7.2  |
| Med25  | 8.8   | 10.6 | 9.4  | 8.6   | 8.7  | 8.7  | 9.2  | 9.5  | 9.4  | 8.7   | 9.2   | 6.9  |
| Med26  | 1.6   | 2.1  | 2.0  | 2.0   | 2.1  | 2.0  | 2.0  | 1.9  | 2.3  | 2.2   | 2.0   | 1.7  |
| Med27  | 12.9  | 13.3 | 11.5 | 13.9  | 10.4 | 11.6 | 12.9 | 13.3 | 12.4 | 12.4  | 12.6  | 11.6 |
| Med28  | 11.4  | 10.1 | 7.8  | 10.9  | 10.7 | 11.1 | 8.2  | 8.3  | 9.0  | 10.3  | 8.8   | 9.0  |
| Med29  | 7.7   | 6.2  | 5.8  | 7.6   | 6.3  | 7.1  | 7.4  | 5.9  | 5.8  | 6.9   | 6.7   | 5.4  |
| Med30  | 17.7  | 18.2 | 15.2 | 16.9  | 16.2 | 15.0 | 18.5 | 16.4 | 18.1 | 20.1  | 17.3  | 21.2 |
| Med31  | 5.4   | 6.7  | 6.1  | 5.6   | 6.6  | 5.7  | 6.0  | 4.3  | 4.6  | 5.6   | 8.3   | 5.6  |

Online Table 1

|          |      |      |      |      |      |      |      |      |      |      |      |      |
|----------|------|------|------|------|------|------|------|------|------|------|------|------|
| Med4     | 8.9  | 11.2 | 12.0 | 7.9  | 11.7 | 7.3  | 10.9 | 10.7 | 11.2 | 8.9  | 10.4 | 11.5 |
| Med6     | 16.7 | 19.0 | 17.9 | 16.9 | 17.0 | 18.1 | 18.1 | 18.3 | 18.5 | 17.4 | 17.2 | 19.6 |
| Med7     | 7.3  | 7.7  | 7.3  | 7.4  | 7.2  | 7.2  | 6.7  | 6.8  | 6.2  | 8.3  | 8.1  | 8.5  |
| Med8     | 13.6 | 13.7 | 14.2 | 14.8 | 13.1 | 10.2 | 13.8 | 14.2 | 13.7 | 13.2 | 14.7 | 14.1 |
| Med9     | 5.0  | 4.9  | 3.9  | 4.7  | 4.2  | 4.8  | 4.4  | 4.4  | 4.7  | 4.6  | 4.7  | 4.0  |
| Medag    | 55.2 | 51.2 | 47.8 | 69.0 | 58.7 | 79.9 | 63.9 | 53.3 | 58.6 | 46.1 | 45.6 | 61.6 |
| Mef2a    | 10.3 | 8.1  | 9.5  | 11.6 | 13.8 | 9.1  | 10.7 | 8.3  | 8.6  | 13.0 | 10.3 | 11.3 |
| Mef2b    | 0.1  | 0.0  | 0.0  | 0.1  | 0.0  | 0.1  | 0.0  | 0.0  | 0.0  | 0.1  | 0.0  | 0.0  |
| Mef2c    | 0.4  | 0.5  | 1.0  | 0.8  | 1.1  | 0.4  | 0.5  | 0.8  | 0.6  | 0.4  | 0.5  | 0.7  |
| Mef2d    | 3.8  | 4.9  | 4.3  | 4.8  | 4.6  | 5.0  | 5.2  | 4.7  | 4.1  | 3.8  | 4.2  | 3.9  |
| Mefv     | 0.0  | 0.0  | 0.0  | 0.0  | 0.0  | 0.0  | 0.0  | 0.0  | 0.0  | 0.0  | 0.0  | 0.0  |
| Meg3     | 20.6 | 21.0 | 21.1 | 22.4 | 19.1 | 24.9 | 30.5 | 22.5 | 45.3 | 29.3 | 30.6 | 20.6 |
| Megf10   | 0.7  | 0.8  | 1.4  | 0.6  | 1.9  | 1.1  | 1.3  | 1.2  | 1.5  | 1.2  | 1.3  | 1.0  |
| Megf11   | 0.3  | 0.1  | 0.1  | 0.1  | 0.2  | 0.2  | 0.2  | 0.1  | 0.2  | 0.3  | 0.2  | 0.2  |
| Megf6    | 0.0  | 0.0  | 0.0  | 0.0  | 0.0  | 0.0  | 0.0  | 0.2  | 0.3  | 0.7  | 0.2  | 0.2  |
| Megf8    | 13.8 | 12.6 | 9.8  | 11.0 | 13.1 | 12.9 | 14.5 | 10.1 | 13.0 | 13.0 | 10.1 | 9.3  |
| Megf9    | 10.8 | 12.2 | 10.1 | 11.9 | 9.8  | 10.1 | 8.8  | 10.2 | 8.9  | 8.9  | 9.0  | 7.4  |
| Meiob    | 0.2  | 0.1  | 0.1  | 0.2  | 0.1  | 0.3  | 0.1  | 0.1  | 0.0  | 0.0  | 0.0  | 0.1  |
| Meis1    | 4.2  | 5.9  | 6.3  | 4.0  | 4.2  | 4.8  | 4.5  | 6.5  | 6.3  | 10.4 | 7.6  | 7.1  |
| Meis2    | 5.4  | 4.3  | 5.1  | 4.2  | 2.4  | 3.4  | 3.8  | 4.6  | 3.9  | 7.4  | 6.9  | 6.3  |
| Meis3    | 6.5  | 6.7  | 6.5  | 7.1  | 6.7  | 6.8  | 7.7  | 6.8  | 8.2  | 6.8  | 6.9  | 7.2  |
| Melk     | 1.6  | 3.0  | 4.5  | 1.1  | 4.5  | 0.7  | 4.6  | 2.2  | 4.0  | 1.7  | 2.8  | 2.2  |
| Memo1    | 26.3 | 25.5 | 23.7 | 28.7 | 28.4 | 25.3 | 28.2 | 27.2 | 27.0 | 28.9 | 33.7 | 28.9 |
| Men1     | 6.6  | 7.9  | 8.1  | 6.7  | 7.5  | 6.7  | 9.3  | 9.2  | 8.8  | 7.7  | 8.9  | 7.3  |
| Meox1    | 1.2  | 1.1  | 1.9  | 0.8  | 1.4  | 2.0  | 0.6  | 1.2  | 0.8  | 0.5  | 0.3  | 0.4  |
| Meox2    | 0.3  | 0.2  | 0.3  | 0.4  | 0.2  | 0.1  | 0.2  | 1.0  | 0.4  | 0.2  | 0.1  | 0.2  |
| Mep1a    | 0.0  | 0.0  | 0.0  | 0.0  | 0.0  | 0.0  | 0.0  | 0.0  | 0.0  | 0.0  | 0.0  | 0.0  |
| Mepce    | 5.5  | 6.0  | 6.1  | 5.3  | 6.0  | 5.8  | 6.1  | 6.0  | 5.9  | 6.7  | 5.4  | 5.8  |
| Mertk    | 5.3  | 3.8  | 3.0  | 6.8  | 4.1  | 4.6  | 3.2  | 1.3  | 1.6  | 3.4  | 2.6  | 2.2  |
| Mesdc1   | 4.0  | 4.2  | 4.4  | 3.1  | 4.7  | 2.7  | 4.7  | 5.7  | 5.6  | 5.8  | 4.0  | 3.8  |
| Mesdc2   | 25.7 | 23.2 | 22.4 | 30.2 | 21.2 | 28.4 | 22.3 | 20.4 | 20.1 | 21.7 | 21.5 | 24.5 |
| Mesp2    | 0.0  | 0.0  | 0.0  | 0.1  | 0.0  | 0.0  | 0.0  | 0.0  | 0.0  | 0.0  | 0.0  | 0.0  |
| Mest     | 1.6  | 0.9  | 0.9  | 1.6  | 1.7  | 1.1  | 1.5  | 2.4  | 1.6  | 2.6  | 3.7  | 1.6  |
| Met      | 5.0  | 3.4  | 2.2  | 4.8  | 2.6  | 5.2  | 1.6  | 1.5  | 1.8  | 8.7  | 4.9  | 3.4  |
| Metap1   | 15.8 | 14.4 | 14.9 | 15.2 | 13.0 | 15.4 | 14.8 | 14.5 | 14.2 | 15.3 | 17.7 | 16.0 |
| Metap1d  | 12.1 | 9.4  | 8.6  | 9.9  | 8.0  | 8.7  | 6.2  | 9.2  | 6.7  | 7.0  | 8.7  | 7.2  |
| Metap2   | 25.6 | 25.1 | 24.7 | 29.5 | 23.3 | 26.3 | 23.6 | 22.4 | 21.1 | 26.4 | 28.0 | 28.5 |
| Metrn    | 10.1 | 8.2  | 5.9  | 9.2  | 7.1  | 11.7 | 7.9  | 4.9  | 7.7  | 7.2  | 7.1  | 5.9  |
| Metrnl   | 9.0  | 7.8  | 6.9  | 14.0 | 22.0 | 6.3  | 12.8 | 9.1  | 12.9 | 11.2 | 12.3 | 10.2 |
| Mettl1   | 7.6  | 5.7  | 4.7  | 9.7  | 7.7  | 7.7  | 6.9  | 6.8  | 5.9  | 6.0  | 5.9  | 6.2  |
| Mettl10  | 15.5 | 13.6 | 14.2 | 14.4 | 12.3 | 14.9 | 10.9 | 14.6 | 15.3 | 12.4 | 14.9 | 15.1 |
| Mettl13  | 2.9  | 2.3  | 2.2  | 2.2  | 2.3  | 3.0  | 2.0  | 2.1  | 1.8  | 2.3  | 2.0  | 1.9  |
| Mettl14  | 3.9  | 3.7  | 3.4  | 5.0  | 3.9  | 4.3  | 4.0  | 3.1  | 3.0  | 3.7  | 4.9  | 3.8  |
| Mettl15  | 2.4  | 2.5  | 2.8  | 2.8  | 1.7  | 2.4  | 1.9  | 2.3  | 2.0  | 1.5  | 2.6  | 2.0  |
| Mettl16  | 16.0 | 14.1 | 13.8 | 17.1 | 13.1 | 14.2 | 13.6 | 13.1 | 13.3 | 16.6 | 17.6 | 16.0 |
| Mettl17  | 3.1  | 3.2  | 2.9  | 2.4  | 2.7  | 3.3  | 2.7  | 2.9  | 3.3  | 4.0  | 2.5  | 2.7  |
| Mettl18  | 2.3  | 2.7  | 2.2  | 3.0  | 2.5  | 2.7  | 1.8  | 2.4  | 2.7  | 2.4  | 2.3  | 2.1  |
| Mettl2   | 4.8  | 5.2  | 4.6  | 5.6  | 4.1  | 6.0  | 4.7  | 4.9  | 5.0  | 5.1  | 5.5  | 5.3  |
| Mettl20  | 2.1  | 2.7  | 2.1  | 2.2  | 1.5  | 2.5  | 1.3  | 1.5  | 2.8  | 3.3  | 2.5  | 3.7  |
| Mettl21a | 11.8 | 10.9 | 9.9  | 8.9  | 9.4  | 9.9  | 8.6  | 9.4  | 9.6  | 10.8 | 10.8 | 10.8 |
| Mettl21c | 0.1  | 0.1  | 0.2  | 0.1  | 0.1  | 0.2  | 0.0  | 0.0  | 0.1  | 0.1  | 0.1  | 0.1  |
| Mettl21d | 4.0  | 3.4  | 4.2  | 4.7  | 3.8  | 4.9  | 3.7  | 2.5  | 2.8  | 3.5  | 2.6  | 3.9  |
| Mettl21e | 0.0  | 0.1  | 0.1  | 0.0  | 0.0  | 0.0  | 0.1  | 0.1  | 0.1  | 0.0  | 0.0  | 0.1  |
| Mettl22  | 3.5  | 3.0  | 2.5  | 5.2  | 2.3  | 4.8  | 2.4  | 2.3  | 2.7  | 2.8  | 3.5  | 2.6  |
| Mettl23  | 11.8 | 10.2 | 7.9  | 7.3  | 9.7  | 9.9  | 7.6  | 9.2  | 10.8 | 11.1 | 10.1 | 8.5  |
| Mettl24  | 0.9  | 0.5  | 0.3  | 0.6  | 0.4  | 0.7  | 0.4  | 0.3  | 0.3  | 0.6  | 0.7  | 0.8  |
| Mettl25  | 3.1  | 2.7  | 2.7  | 3.4  | 3.0  | 3.3  | 3.1  | 1.9  | 2.4  | 2.6  | 3.3  | 2.6  |

Online Table 1

|          |       |       |       |       |       |       |       |       |       |       |       |       |
|----------|-------|-------|-------|-------|-------|-------|-------|-------|-------|-------|-------|-------|
| Mettl3   | 10.8  | 10.3  | 9.2   | 11.5  | 10.6  | 10.8  | 11.2  | 10.4  | 10.0  | 10.4  | 11.0  | 10.6  |
| Mettl4   | 5.8   | 6.8   | 6.1   | 3.9   | 5.2   | 6.7   | 4.7   | 5.2   | 5.0   | 5.5   | 5.6   | 5.6   |
| Mettl5   | 6.8   | 9.1   | 7.1   | 7.9   | 5.9   | 9.8   | 6.0   | 7.1   | 5.8   | 7.1   | 7.1   | 7.9   |
| Mettl6   | 10.7  | 11.4  | 10.2  | 8.3   | 11.5  | 10.5  | 10.4  | 9.9   | 9.2   | 12.3  | 11.9  | 10.9  |
| Mettl7a1 | 22.6  | 21.1  | 28.0  | 20.9  | 12.9  | 22.3  | 11.4  | 16.0  | 13.5  | 15.1  | 15.0  | 16.7  |
| Mettl7a2 | 0.4   | 0.3   | 0.4   | 0.5   | 0.1   | 0.4   | 0.1   | 0.3   | 0.2   | 0.3   | 0.2   | 0.3   |
| Mettl7a3 | 0.1   | 0.0   | 0.1   | 0.0   | 0.0   | 0.1   | 0.0   | 0.1   | 0.0   | 0.1   | 0.0   | 0.0   |
| Mettl7b  | 0.6   | 0.3   | 0.1   | 0.0   | 0.1   | 0.1   | 0.3   | 0.3   | 0.3   | 0.2   | 0.3   | 0.3   |
| Mettl8   | 2.4   | 2.3   | 2.7   | 1.9   | 1.9   | 2.1   | 2.2   | 2.5   | 1.7   | 2.0   | 2.4   | 2.1   |
| Mettl9   | 26.4  | 25.9  | 26.0  | 22.8  | 21.8  | 22.8  | 25.2  | 27.4  | 32.4  | 32.5  | 32.6  | 31.8  |
| Mex3a    | 1.2   | 1.1   | 1.0   | 1.0   | 0.8   | 1.1   | 0.8   | 0.9   | 0.7   | 1.4   | 1.3   | 1.0   |
| Mex3b    | 0.5   | 0.4   | 0.5   | 0.6   | 0.6   | 0.8   | 0.6   | 0.7   | 0.4   | 0.5   | 0.7   | 0.4   |
| Mex3c    | 19.8  | 20.5  | 17.9  | 18.5  | 19.6  | 18.1  | 19.4  | 18.0  | 21.2  | 23.0  | 24.5  | 21.7  |
| Mex3d    | 4.7   | 5.0   | 4.4   | 4.5   | 4.3   | 4.5   | 4.7   | 4.9   | 5.6   | 4.7   | 4.7   | 3.8   |
| Mfap1a   | 9.4   | 9.7   | 11.8  | 12.5  | 9.8   | 10.8  | 9.2   | 10.5  | 9.8   | 11.6  | 13.2  | 14.1  |
| Mfap1b   | 7.8   | 7.2   | 9.3   | 10.1  | 6.8   | 8.0   | 8.0   | 7.5   | 7.6   | 8.5   | 9.3   | 11.4  |
| Mfap2    | 0.1   | 0.5   | 1.1   | 0.0   | 0.3   | 0.1   | 0.2   | 0.2   | 0.4   | 0.9   | 0.5   | 0.5   |
| Mfap3    | 5.8   | 6.7   | 6.7   | 6.3   | 6.7   | 6.3   | 6.4   | 6.8   | 6.1   | 5.8   | 5.5   | 6.1   |
| Mfap3l   | 3.7   | 2.7   | 2.0   | 5.0   | 2.7   | 4.0   | 2.2   | 1.4   | 1.5   | 1.2   | 1.8   | 1.5   |
| Mfap4    | 32.3  | 76.0  | 200.9 | 38.7  | 69.9  | 35.9  | 44.4  | 223.6 | 64.0  | 23.8  | 31.7  | 51.7  |
| Mfap5    | 80.3  | 98.6  | 129.2 | 83.6  | 77.2  | 73.7  | 138.2 | 190.5 | 148.1 | 93.9  | 112.9 | 124.0 |
| Mff      | 37.8  | 34.6  | 29.1  | 35.8  | 32.4  | 36.8  | 31.1  | 30.8  | 32.4  | 33.1  | 35.3  | 33.8  |
| Mfge8    | 153.6 | 112.0 | 89.6  | 190.2 | 128.4 | 189.5 | 120.6 | 136.6 | 135.1 | 105.9 | 113.6 | 103.8 |
| Mfhas1   | 6.4   | 6.7   | 5.5   | 5.9   | 6.2   | 5.7   | 6.3   | 6.2   | 7.4   | 5.2   | 5.8   | 5.0   |
| Mfi2     | 0.0   | 0.0   | 0.0   | 0.0   | 0.0   | 0.0   | 0.0   | 0.0   | 0.0   | 0.0   | 0.0   | 0.0   |
| Mfn1     | 10.4  | 10.2  | 9.3   | 9.4   | 8.7   | 10.8  | 8.5   | 8.6   | 8.4   | 9.3   | 10.2  | 10.2  |
| Mfn2     | 25.0  | 22.8  | 18.5  | 27.8  | 19.9  | 25.9  | 19.3  | 17.7  | 17.5  | 18.2  | 18.9  | 18.2  |
| Mfng     | 0.1   | 0.0   | 0.0   | 0.3   | 0.5   | 0.0   | 0.1   | 0.2   | 0.1   | 0.1   | 0.0   | 0.0   |
| Mfsd1    | 48.1  | 37.7  | 30.6  | 52.3  | 50.4  | 46.3  | 33.7  | 34.4  | 36.0  | 41.9  | 36.7  | 40.0  |
| Mfsd10   | 8.5   | 9.1   | 9.4   | 7.7   | 9.5   | 9.7   | 10.0  | 10.6  | 10.9  | 9.1   | 7.4   | 7.0   |
| Mfsd11   | 7.4   | 7.5   | 6.5   | 8.6   | 9.9   | 9.8   | 7.2   | 7.4   | 8.8   | 8.7   | 6.7   | 7.8   |
| Mfsd12   | 2.7   | 2.6   | 2.5   | 4.2   | 4.8   | 2.8   | 2.3   | 2.3   | 3.0   | 2.4   | 2.1   | 2.6   |
| Mfsd2a   | 1.3   | 1.8   | 1.4   | 0.8   | 2.2   | 0.9   | 3.3   | 5.1   | 3.7   | 2.1   | 4.0   | 1.6   |
| Mfsd2b   | 0.1   | 0.0   | 0.0   | 0.1   | 0.1   | 0.1   | 0.0   | 0.0   | 0.0   | 0.1   | 0.0   | 0.1   |
| Mfsd3    | 6.3   | 5.7   | 4.5   | 4.7   | 5.0   | 6.0   | 5.2   | 5.8   | 6.2   | 6.1   | 4.2   | 4.8   |
| Mfsd4    | 2.0   | 2.4   | 2.7   | 1.5   | 2.4   | 2.2   | 1.9   | 2.4   | 2.1   | 2.2   | 2.5   | 2.3   |
| Mfsd5    | 19.6  | 19.3  | 16.4  | 26.2  | 20.1  | 22.5  | 22.1  | 19.0  | 19.5  | 17.5  | 19.1  | 16.0  |
| Mfsd6    | 9.6   | 6.7   | 5.4   | 16.4  | 11.4  | 11.9  | 6.6   | 5.0   | 4.0   | 5.3   | 6.8   | 5.6   |
| Mfsd7a   | 1.1   | 1.1   | 1.4   | 1.2   | 1.1   | 1.9   | 1.4   | 1.7   | 1.4   | 0.8   | 1.0   | 1.0   |
| Mfsd7b   | 1.8   | 2.1   | 1.9   | 2.7   | 3.6   | 1.8   | 2.3   | 1.5   | 1.9   | 2.2   | 2.1   | 1.8   |
| Mfsd7c   | 0.1   | 0.2   | 0.1   | 0.1   | 0.1   | 0.0   | 0.1   | 0.2   | 0.2   | 0.2   | 0.2   | 0.1   |
| Mfsd8    | 4.6   | 4.0   | 3.4   | 4.2   | 3.7   | 4.6   | 3.2   | 3.3   | 3.9   | 4.2   | 3.3   | 4.1   |
| Mfsd9    | 1.7   | 2.0   | 2.3   | 1.5   | 2.0   | 1.9   | 2.0   | 2.5   | 2.1   | 1.8   | 1.9   | 2.0   |
| Mga      | 6.0   | 6.8   | 7.3   | 6.1   | 6.5   | 5.9   | 6.3   | 6.8   | 6.2   | 7.3   | 7.7   | 7.5   |
| Mgam     | 0.3   | 0.4   | 0.4   | 0.1   | 0.7   | 0.1   | 1.1   | 2.2   | 1.0   | 0.4   | 1.1   | 0.7   |
| Mgarp    | 0.2   | 0.5   | 0.3   | 0.3   | 0.4   | 0.8   | 0.5   | 0.1   | 0.4   | 0.3   | 0.2   | 0.2   |
| Mgat1    | 27.3  | 25.3  | 23.5  | 28.4  | 28.5  | 28.7  | 30.8  | 28.0  | 31.9  | 25.3  | 23.4  | 25.5  |
| Mgat2    | 40.1  | 37.6  | 37.3  | 38.1  | 43.0  | 40.1  | 49.0  | 40.0  | 46.2  | 45.4  | 47.6  | 47.2  |
| Mgat3    | 4.7   | 7.4   | 7.7   | 4.1   | 5.8   | 7.4   | 6.5   | 6.1   | 8.3   | 7.5   | 6.1   | 7.6   |
| Mgat4a   | 2.3   | 2.9   | 2.9   | 3.3   | 4.4   | 2.6   | 2.4   | 2.2   | 2.0   | 2.0   | 1.9   | 2.4   |
| Mgat4b   | 14.6  | 14.1  | 11.9  | 16.1  | 13.5  | 21.2  | 12.9  | 9.2   | 11.6  | 10.4  | 9.8   | 9.9   |
| Mgat5    | 4.1   | 3.2   | 3.4   | 5.2   | 5.8   | 4.6   | 4.3   | 3.6   | 2.9   | 3.6   | 3.8   | 3.6   |
| Mgat5b   | 0.0   | 0.0   | 0.0   | 0.0   | 0.0   | 0.0   | 0.0   | 0.0   | 0.0   | 0.0   | 0.0   | 0.0   |
| Mgea5    | 36.0  | 36.6  | 30.5  | 36.5  | 32.1  | 35.8  | 26.2  | 29.4  | 28.6  | 25.5  | 32.5  | 28.7  |
| Mgl2     | 0.3   | 0.0   | 0.0   | 0.1   | 0.1   | 0.2   | 0.0   | 0.1   | 0.1   | 0.0   | 0.0   | 0.1   |
| Mgl1     | 13.5  | 9.2   | 8.7   | 8.4   | 7.6   | 10.2  | 7.4   | 12.0  | 6.9   | 9.5   | 11.9  | 7.7   |
| Mgme1    | 3.8   | 3.9   | 3.7   | 4.4   | 4.1   | 5.3   | 4.2   | 3.1   | 3.5   | 3.1   | 3.9   | 3.4   |

Online Table 1

|          |         |         |         |         |         |         |         |         |         |         |         |         |
|----------|---------|---------|---------|---------|---------|---------|---------|---------|---------|---------|---------|---------|
| Mgmt     | 52.6    | 43.9    | 38.1    | 51.8    | 35.3    | 58.3    | 30.4    | 29.1    | 27.8    | 49.5    | 42.8    | 35.9    |
| Mgp      | 55.5    | 66.3    | 202.2   | 9.5     | 37.3    | 17.2    | 46.5    | 158.1   | 103.0   | 771.2   | 227.1   | 478.1   |
| Mgrn1    | 21.2    | 18.6    | 18.1    | 21.2    | 19.6    | 19.1    | 20.4    | 16.7    | 18.2    | 20.1    | 19.6    | 18.9    |
| Mgst1    | 191.4   | 230.3   | 244.9   | 194.0   | 208.4   | 185.8   | 187.6   | 239.7   | 192.8   | 264.8   | 214.8   | 236.8   |
| Mgst2    | 1.3     | 0.8     | 0.7     | 1.2     | 2.0     | 0.7     | 0.2     | 0.4     | 0.4     | 1.2     | 0.3     | 0.2     |
| Mgst3    | 7.4     | 6.2     | 5.3     | 16.4    | 12.0    | 12.1    | 7.4     | 6.7     | 4.5     | 5.1     | 3.4     | 5.2     |
| Mia      | 0.2     | 0.2     | 0.2     | 0.0     | 0.1     | 0.0     | 0.0     | 0.2     | 0.1     | 0.2     | 0.0     | 0.0     |
| Mia3     | 37.9    | 38.0    | 43.7    | 41.9    | 33.6    | 43.1    | 41.5    | 39.3    | 34.1    | 31.5    | 40.7    | 39.3    |
| Miat     | 0.0     | 0.0     | 0.0     | 0.0     | 0.0     | 0.0     | 0.0     | 0.0     | 0.0     | 0.0     | 0.0     | 0.0     |
| Mib1     | 20.7    | 18.7    | 15.0    | 17.2    | 17.4    | 18.2    | 16.8    | 16.5    | 15.1    | 15.7    | 16.7    | 15.6    |
| Mib2     | 9.7     | 11.0    | 10.4    | 9.2     | 6.9     | 11.9    | 8.4     | 8.3     | 8.4     | 8.5     | 8.3     | 7.7     |
| Mical1   | 12.4    | 12.5    | 13.0    | 16.0    | 14.9    | 14.5    | 13.1    | 12.8    | 12.0    | 8.5     | 10.7    | 11.0    |
| Mical2   | 53.0    | 64.9    | 60.8    | 43.4    | 48.0    | 49.9    | 62.3    | 58.0    | 60.5    | 66.1    | 66.5    | 65.2    |
| Mical3   | 2.6     | 3.0     | 3.2     | 2.4     | 2.9     | 2.3     | 3.9     | 3.8     | 3.3     | 3.6     | 3.7     | 3.7     |
| Micalcl  | 0.5     | 0.8     | 0.8     | 0.6     | 0.6     | 0.4     | 0.6     | 0.5     | 0.5     | 0.9     | 0.7     | 1.0     |
| Micall1  | 5.3     | 4.7     | 4.5     | 4.9     | 4.4     | 4.2     | 5.5     | 4.3     | 4.6     | 6.2     | 5.9     | 5.2     |
| Micall2  | 8.7     | 12.0    | 11.9    | 7.9     | 11.8    | 7.5     | 11.7    | 9.0     | 9.3     | 6.4     | 7.7     | 7.9     |
| Micu1    | 29.3    | 26.5    | 23.2    | 32.4    | 23.4    | 32.4    | 21.3    | 26.1    | 20.1    | 21.5    | 21.4    | 23.5    |
| Mid1     | 5.7     | 8.4     | 9.1     | 5.1     | 6.3     | 4.7     | 6.9     | 6.9     | 6.2     | 4.2     | 5.1     | 4.3     |
| Mid1ip1  | 17.5    | 15.6    | 15.3    | 15.0    | 15.8    | 14.3    | 21.1    | 25.3    | 19.8    | 14.3    | 20.2    | 12.8    |
| Mid2     | 3.7     | 4.3     | 4.3     | 4.6     | 3.2     | 4.1     | 3.8     | 4.4     | 4.3     | 3.6     | 5.0     | 4.6     |
| Midn     | 5.9     | 7.3     | 7.4     | 6.6     | 7.9     | 6.5     | 6.9     | 8.2     | 9.0     | 8.1     | 6.7     | 6.1     |
| Mien1    | 64.8    | 60.8    | 48.0    | 64.6    | 56.9    | 68.0    | 55.3    | 56.1    | 49.6    | 58.7    | 60.0    | 55.1    |
| Mier1    | 8.9     | 9.8     | 11.6    | 10.9    | 9.4     | 9.6     | 8.9     | 8.9     | 8.6     | 9.5     | 10.5    | 11.2    |
| Mier2    | 6.5     | 7.4     | 6.0     | 6.4     | 6.9     | 6.7     | 8.5     | 6.4     | 7.8     | 6.5     | 6.4     | 6.2     |
| Mier3    | 5.7     | 6.6     | 7.9     | 6.3     | 5.1     | 6.6     | 7.1     | 7.3     | 6.8     | 6.7     | 7.4     | 8.5     |
| Mif      | 186.0   | 145.1   | 127.5   | 188.4   | 160.5   | 221.6   | 132.9   | 138.2   | 121.7   | 161.1   | 133.1   | 135.2   |
| Mif4gd   | 5.5     | 4.1     | 6.0     | 5.9     | 5.8     | 5.5     | 6.4     | 7.7     | 6.4     | 6.1     | 5.3     | 6.9     |
| Miip     | 5.4     | 5.9     | 5.4     | 4.9     | 5.4     | 4.8     | 5.3     | 4.2     | 6.4     | 5.0     | 5.5     | 5.0     |
| Mill2    | 5.3     | 7.1     | 8.9     | 6.2     | 6.3     | 7.3     | 7.0     | 6.6     | 4.1     | 4.1     | 4.1     | 5.4     |
| Milr1    | 0.9     | 0.1     | 0.2     | 4.6     | 10.2    | 0.1     | 1.3     | 0.2     | 0.1     | 0.9     | 0.1     | 1.1     |
| Mina     | 6.4     | 4.9     | 4.9     | 8.7     | 6.9     | 6.7     | 7.2     | 5.0     | 5.2     | 6.1     | 7.2     | 6.6     |
| Mink1    | 7.0     | 6.3     | 6.1     | 8.6     | 6.5     | 8.6     | 5.6     | 4.8     | 5.0     | 5.8     | 5.5     | 5.0     |
| Minos1   | 16.0    | 14.3    | 16.7    | 16.0    | 15.4    | 15.8    | 18.1    | 14.2    | 14.4    | 18.2    | 17.0    | 18.3    |
| Minpp1   | 14.7    | 13.5    | 11.9    | 16.0    | 14.7    | 13.6    | 14.1    | 13.3    | 13.8    | 14.8    | 14.2    | 13.0    |
| Mios     | 5.5     | 6.2     | 6.0     | 4.9     | 5.3     | 4.0     | 5.8     | 6.7     | 7.8     | 5.6     | 6.4     | 6.5     |
| Mip      | 0.1     | 0.0     | 0.0     | 0.0     | 0.0     | 0.0     | 0.0     | 0.1     | 0.0     | 0.0     | 0.0     | 0.0     |
| Mipep    | 5.4     | 4.3     | 4.9     | 6.3     | 4.6     | 8.0     | 4.4     | 4.2     | 3.5     | 4.8     | 4.4     | 4.1     |
| Mipol1   | 4.4     | 4.5     | 4.1     | 2.7     | 3.1     | 4.3     | 3.4     | 3.3     | 2.2     | 3.3     | 2.9     | 3.4     |
| Mir143hg | 3.4     | 4.4     | 5.2     | 3.0     | 3.9     | 3.3     | 6.0     | 4.9     | 5.3     | 3.3     | 5.4     | 4.6     |
| Mir17hg  | 0.3     | 0.3     | 0.3     | 0.3     | 0.3     | 0.1     | 0.3     | 0.2     | 0.2     | 0.2     | 0.4     | 0.3     |
| Mir1940  | 14.4    | 0.0     | 11.3    | 0.0     | 0.0     | 9.0     | 22.3    | 26.9    | 14.4    | 8.1     | 11.9    | 6.8     |
| Mir1983  | 0.0     | 0.0     | 0.0     | 11.6    | 3.7     | 0.0     | 2.2     | 4.5     | 2.2     | 0.0     | 0.0     | 4.4     |
| Mir2137  | 17453.8 | 60445.9 | 11669.9 | 86708.1 | 30537.4 | 16613.9 | 33465.8 | 19729.2 | 19462.4 | 23332.1 | 46996.7 | 58902.4 |
| Mir22    | 0.0     | 0.0     | 0.0     | 0.0     | 0.0     | 0.0     | 0.0     | 0.0     | 0.0     | 0.0     | 0.0     | 0.0     |
| Mir22hg  | 14.2    | 13.8    | 10.9    | 14.4    | 15.7    | 13.5    | 16.1    | 11.7    | 17.4    | 18.4    | 15.7    | 16.1    |
| Mir3069  | 0.0     | 0.0     | 0.0     | 0.0     | 0.0     | 0.0     | 0.0     | 0.0     | 0.0     | 0.0     | 0.0     | 0.0     |
| Mir546   | 0.0     | 0.0     | 1.4     | 0.0     | 0.0     | 0.0     | 0.0     | 0.0     | 0.0     | 0.0     | 0.0     | 0.0     |
| Mir671   | 0.0     | 0.0     | 0.0     | 0.0     | 0.0     | 0.0     | 0.0     | 0.0     | 0.0     | 0.0     | 0.0     | 0.0     |
| Mir678   | 0.0     | 0.0     | 0.0     | 0.0     | 0.0     | 0.0     | 0.0     | 0.0     | 0.0     | 0.0     | 0.0     | 0.0     |
| Mir682   | 0.0     | 19.0    | 0.0     | 18.2    | 18.0    | 7.1     | 0.0     | 8.6     | 7.6     | 1.9     | 8.5     | 0.0     |
| Mir684-1 | 0.0     | 23.7    | 13.3    | 3.0     | 18.2    | 4.3     | 12.2    | 16.9    | 7.0     | 18.8    | 6.6     | 21.1    |
| Mir686   | 0.8     | 0.0     | 0.0     | 0.0     | 0.0     | 0.0     | 0.0     | 0.0     | 0.0     | 0.0     | 0.0     | 0.0     |
| Mir692-1 | 3.3     | 2.3     | 1.1     | 18.0    | 1.8     | 6.9     | 1.1     | 0.0     | 2.8     | 0.0     | 0.5     | 0.0     |
| Mir703   | 12.3    | 7.6     | 97.6    | 49.6    | 42.3    | 67.4    | 15.9    | 60.7    | 39.7    | 88.5    | 9.5     | 101.7   |
| Mir719   | 0.6     | 0.0     | 0.0     | 2.7     | 0.0     | 0.0     | 0.0     | 0.0     | 10.5    | 11.2    | 4.3     | 0.0     |
| Mira     | 0.0     | 0.0     | 0.0     | 0.2     | 0.0     | 0.1     | 0.0     | 0.0     | 0.0     | 0.9     | 1.2     | 0.2     |

Online Table 1

|          |       |      |      |      |       |      |      |      |      |      |      |      |
|----------|-------|------|------|------|-------|------|------|------|------|------|------|------|
| Mirg     | 1.7   | 0.9  | 0.9  | 1.0  | 1.3   | 1.2  | 1.7  | 1.8  | 3.0  | 2.8  | 3.7  | 1.8  |
| Mis12    | 13.8  | 15.7 | 15.1 | 13.7 | 14.1  | 13.0 | 13.8 | 13.1 | 12.6 | 13.7 | 14.8 | 15.5 |
| Mis18a   | 2.9   | 3.7  | 4.6  | 2.4  | 4.9   | 2.1  | 3.9  | 3.7  | 4.4  | 3.7  | 3.3  | 2.7  |
| Mis18bp1 | 0.9   | 1.5  | 2.0  | 0.6  | 1.9   | 0.5  | 2.3  | 1.1  | 1.8  | 1.1  | 1.6  | 1.4  |
| Mitd1    | 11.7  | 10.1 | 11.3 | 13.9 | 10.4  | 9.3  | 9.6  | 10.1 | 9.2  | 11.1 | 11.3 | 13.2 |
| Mitf     | 1.6   | 1.7  | 2.0  | 3.6  | 3.1   | 1.6  | 1.5  | 1.4  | 1.2  | 1.9  | 2.1  | 2.2  |
| Mixl1    | 0.0   | 0.0  | 0.0  | 0.0  | 0.0   | 0.0  | 0.0  | 0.0  | 0.0  | 0.0  | 0.0  | 0.0  |
| Mki67    | 3.5   | 5.9  | 11.1 | 1.2  | 9.0   | 0.9  | 12.6 | 4.7  | 7.5  | 3.8  | 7.7  | 5.5  |
| Mki67ip  | 20.5  | 14.9 | 14.7 | 20.9 | 17.8  | 16.2 | 16.9 | 15.3 | 14.3 | 19.3 | 19.4 | 16.3 |
| Mkks     | 9.8   | 9.3  | 8.3  | 9.4  | 9.7   | 9.8  | 8.2  | 8.9  | 9.6  | 9.5  | 9.4  | 9.7  |
| Mkl1     | 2.6   | 3.9  | 3.5  | 3.2  | 4.6   | 3.3  | 5.5  | 2.9  | 4.6  | 4.5  | 3.5  | 2.8  |
| Mkl2     | 2.9   | 3.2  | 2.9  | 3.2  | 3.2   | 3.6  | 3.3  | 2.5  | 2.4  | 2.8  | 2.6  | 2.5  |
| Mklin1   | 17.7  | 19.1 | 18.0 | 17.0 | 15.6  | 17.2 | 16.1 | 16.6 | 16.5 | 17.2 | 17.6 | 18.5 |
| Mknk1    | 7.9   | 6.4  | 5.9  | 7.3  | 8.8   | 5.9  | 7.1  | 7.4  | 7.0  | 6.9  | 7.1  | 6.5  |
| Mknk2    | 14.3  | 19.0 | 15.0 | 14.1 | 16.7  | 15.2 | 14.0 | 13.3 | 15.4 | 16.8 | 14.2 | 13.9 |
| Mkrn1    | 12.6  | 12.4 | 11.4 | 13.6 | 13.0  | 12.9 | 9.5  | 11.3 | 10.4 | 10.7 | 11.0 | 11.4 |
| Mkrn2    | 9.1   | 9.0  | 8.2  | 8.5  | 7.0   | 9.9  | 7.1  | 8.5  | 6.9  | 7.0  | 7.9  | 6.9  |
| Mkrn3    | 0.1   | 0.2  | 0.2  | 0.2  | 0.2   | 0.3  | 0.2  | 0.3  | 0.2  | 0.2  | 0.3  | 0.4  |
| Mks1     | 2.1   | 1.4  | 2.0  | 1.9  | 1.5   | 2.0  | 1.8  | 2.0  | 2.0  | 1.8  | 1.3  | 1.7  |
| Mkx      | 0.5   | 0.4  | 0.3  | 0.6  | 0.6   | 0.6  | 0.8  | 0.3  | 0.3  | 0.3  | 0.5  | 0.4  |
| Mlana    | 7.0   | 1.6  | 0.8  | 3.1  | 0.8   | 1.7  | 0.0  | 0.2  | 0.1  | 1.3  | 0.2  | 1.1  |
| Mlec     | 102.4 | 82.7 | 73.7 | 89.8 | 87.7  | 86.4 | 85.0 | 77.3 | 76.4 | 96.6 | 94.6 | 88.9 |
| Mlf1     | 0.4   | 0.7  | 1.4  | 0.3  | 0.7   | 0.5  | 1.3  | 0.7  | 0.8  | 0.6  | 0.8  | 0.6  |
| Mlf1ip   | 0.3   | 0.4  | 0.7  | 0.1  | 0.4   | 0.2  | 0.7  | 0.4  | 0.5  | 0.3  | 0.5  | 0.5  |
| Mlf2     | 77.3  | 68.3 | 63.2 | 81.6 | 72.2  | 79.1 | 80.8 | 69.7 | 72.9 | 73.0 | 75.3 | 68.8 |
| Mlh1     | 5.3   | 5.3  | 4.5  | 3.6  | 4.2   | 5.1  | 4.2  | 5.2  | 4.8  | 4.4  | 4.7  | 3.7  |
| Mlh3     | 5.5   | 5.6  | 4.8  | 5.5  | 4.7   | 7.2  | 4.8  | 4.8  | 4.6  | 4.9  | 5.6  | 6.0  |
| Mlk1     | 21.7  | 17.9 | 19.4 | 26.3 | 20.8  | 24.0 | 18.8 | 17.5 | 15.1 | 13.7 | 17.3 | 19.4 |
| Mll1     | 1.7   | 2.4  | 2.4  | 1.8  | 2.2   | 2.0  | 2.7  | 1.9  | 1.8  | 1.8  | 1.9  | 1.6  |
| Mll2     | 0.5   | 1.0  | 1.0  | 0.6  | 1.0   | 0.7  | 1.2  | 0.9  | 1.1  | 1.0  | 0.9  | 0.7  |
| Mll3     | 2.2   | 2.6  | 2.6  | 2.1  | 2.3   | 2.2  | 2.2  | 2.3  | 2.1  | 2.2  | 2.0  | 2.2  |
| Mll5     | 3.1   | 4.2  | 5.0  | 3.9  | 4.2   | 4.0  | 4.6  | 4.4  | 4.1  | 4.2  | 5.0  | 4.8  |
| Mllt1    | 6.7   | 7.3  | 6.8  | 6.2  | 6.5   | 7.0  | 6.9  | 7.4  | 6.8  | 6.2  | 7.1  | 6.1  |
| Mllt10   | 3.4   | 5.0  | 5.0  | 3.6  | 3.9   | 3.7  | 4.8  | 5.0  | 4.7  | 4.2  | 4.2  | 4.4  |
| Mllt11   | 8.5   | 8.4  | 7.7  | 11.2 | 9.0   | 9.9  | 9.2  | 8.1  | 9.8  | 7.7  | 10.2 | 8.2  |
| Mllt3    | 12.3  | 15.3 | 15.4 | 9.3  | 8.6   | 13.0 | 11.0 | 10.5 | 11.6 | 9.5  | 12.5 | 14.1 |
| Mllt4    | 10.7  | 10.3 | 10.3 | 10.5 | 8.6   | 9.8  | 10.1 | 9.3  | 9.5  | 10.1 | 11.4 | 9.7  |
| Mllt6    | 3.7   | 4.7  | 5.5  | 4.7  | 4.9   | 4.2  | 4.9  | 5.3  | 5.7  | 5.2  | 4.1  | 5.5  |
| Mlph     | 0.1   | 0.1  | 0.0  | 0.2  | 0.1   | 0.3  | 0.0  | 0.1  | 0.0  | 0.0  | 0.1  | 0.0  |
| Mlst8    | 2.2   | 1.7  | 1.9  | 2.6  | 2.5   | 2.3  | 3.0  | 3.4  | 3.2  | 2.5  | 2.9  | 2.0  |
| Mlx      | 10.3  | 10.1 | 10.2 | 9.2  | 11.0  | 7.8  | 8.4  | 10.2 | 9.8  | 10.8 | 11.2 | 10.9 |
| Mlxip    | 1.9   | 3.0  | 3.2  | 1.9  | 2.8   | 1.6  | 2.4  | 2.5  | 2.7  | 1.8  | 2.1  | 2.2  |
| Mlxipl   | 0.1   | 0.1  | 0.0  | 0.0  | 0.0   | 0.0  | 0.0  | 0.0  | 0.0  | 0.1  | 0.0  | 0.0  |
| Mlycd    | 6.7   | 5.5  | 3.8  | 6.9  | 4.8   | 5.4  | 4.5  | 5.1  | 5.3  | 6.0  | 4.8  | 4.8  |
| Mmaa     | 2.8   | 2.6  | 2.6  | 2.8  | 2.4   | 3.1  | 1.9  | 2.1  | 1.8  | 2.5  | 2.4  | 2.9  |
| Mmab     | 7.8   | 9.5  | 9.8  | 6.5  | 7.2   | 7.7  | 11.4 | 12.9 | 10.1 | 5.7  | 11.5 | 7.5  |
| Mmachc   | 6.9   | 6.3  | 5.7  | 8.0  | 6.1   | 7.1  | 6.7  | 7.3  | 5.9  | 5.7  | 7.9  | 6.1  |
| Mmadhc   | 60.6  | 47.8 | 37.3 | 49.9 | 47.1  | 48.1 | 41.7 | 43.7 | 50.9 | 59.1 | 54.3 | 52.8 |
| Mmd      | 11.7  | 8.9  | 8.8  | 27.3 | 15.9  | 22.6 | 8.2  | 5.2  | 6.0  | 22.9 | 12.5 | 10.3 |
| Mme      | 0.3   | 0.4  | 0.7  | 0.2  | 0.5   | 0.2  | 0.3  | 0.8  | 0.6  | 0.5  | 0.4  | 0.5  |
| Mme1     | 0.3   | 0.1  | 0.1  | 0.1  | 0.1   | 0.1  | 0.1  | 0.1  | 0.1  | 0.1  | 0.2  | 0.2  |
| Mmgt1    | 9.1   | 10.8 | 10.3 | 9.6  | 10.5  | 10.1 | 10.6 | 10.1 | 10.8 | 11.5 | 12.5 | 11.5 |
| Mmgt2    | 7.6   | 7.2  | 6.5  | 9.5  | 6.8   | 7.4  | 7.1  | 5.8  | 6.9  | 7.8  | 8.0  | 6.5  |
| Mmp10    | 3.7   | 2.3  | 4.3  | 7.3  | 3.7   | 4.3  | 1.3  | 0.2  | 0.7  | 1.7  | 0.3  | 1.8  |
| Mmp11    | 8.8   | 11.0 | 13.5 | 8.7  | 6.7   | 11.8 | 7.7  | 14.0 | 13.2 | 12.3 | 9.9  | 10.2 |
| Mmp12    | 10.2  | 0.1  | 0.5  | 82.6 | 102.1 | 0.0  | 4.8  | 1.9  | 0.9  | 4.1  | 1.7  | 2.9  |
| Mmp13    | 0.2   | 0.1  | 0.0  | 0.5  | 0.7   | 0.0  | 0.1  | 0.1  | 0.1  | 0.2  | 0.2  | 0.1  |

Online Table 1



|         |       |       |       |       |       |       |       |       |       |       |       |       |
|---------|-------|-------|-------|-------|-------|-------|-------|-------|-------|-------|-------|-------|
| Mmp14   | 55.4  | 44.4  | 51.5  | 45.3  | 62.3  | 41.1  | 63.0  | 77.6  | 76.6  | 87.7  | 75.4  | 80.8  |
| Mmp15   | 0.8   | 0.6   | 0.4   | 0.5   | 0.7   | 0.5   | 0.5   | 0.3   | 0.4   | 0.3   | 0.5   | 0.4   |
| Mmp16   | 8.0   | 6.1   | 5.4   | 4.3   | 6.1   | 4.0   | 8.4   | 8.0   | 7.8   | 3.8   | 7.0   | 5.5   |
| Mmp17   | 0.4   | 0.4   | 1.0   | 0.4   | 0.6   | 0.3   | 1.8   | 2.5   | 3.5   | 2.5   | 1.4   | 1.6   |
| Mmp19   | 14.5  | 15.7  | 20.2  | 15.7  | 15.2  | 14.5  | 15.4  | 16.9  | 15.4  | 16.1  | 13.9  | 19.0  |
| Mmp1a   | 0.0   | 0.0   | 0.0   | 0.0   | 0.0   | 0.0   | 0.1   | 0.0   | 0.0   | 0.0   | 0.0   | 0.0   |
| Mmp1b   | 0.0   | 0.0   | 0.0   | 0.0   | 0.2   | 0.1   | 0.0   | 0.1   | 0.2   | 0.1   | 0.0   | 0.2   |
| Mmp2    | 74.0  | 72.3  | 118.3 | 46.6  | 58.2  | 53.7  | 47.9  | 83.5  | 53.1  | 100.0 | 82.6  | 89.2  |
| Mmp21   | 0.0   | 0.0   | 0.0   | 0.0   | 0.0   | 0.1   | 0.0   | 0.0   | 0.0   | 0.0   | 0.0   | 0.0   |
| Mmp23   | 20.4  | 27.3  | 36.4  | 20.8  | 25.9  | 31.5  | 33.7  | 64.1  | 53.2  | 43.1  | 31.4  | 45.3  |
| Mmp24   | 0.2   | 0.1   | 0.1   | 0.2   | 0.2   | 0.2   | 0.1   | 0.1   | 0.1   | 0.2   | 0.1   | 0.1   |
| Mmp25   | 0.0   | 0.0   | 0.0   | 0.0   | 0.1   | 0.0   | 0.0   | 0.0   | 0.0   | 0.0   | 0.0   | 0.0   |
| Mmp27   | 1.1   | 1.0   | 1.5   | 0.9   | 0.8   | 0.5   | 0.9   | 0.6   | 0.8   | 0.9   | 0.7   | 1.2   |
| Mmp28   | 1.1   | 1.0   | 1.1   | 0.8   | 0.7   | 2.1   | 1.1   | 1.0   | 1.2   | 0.9   | 1.0   | 0.8   |
| Mmp3    | 116.8 | 98.6  | 180.6 | 196.1 | 95.5  | 121.3 | 21.8  | 10.3  | 31.4  | 52.0  | 15.2  | 73.4  |
| Mmp8    | 3.8   | 6.1   | 11.7  | 7.5   | 14.4  | 1.5   | 9.6   | 6.2   | 8.6   | 11.5  | 8.0   | 15.9  |
| Mmp9    | 0.1   | 0.0   | 0.0   | 0.0   | 0.1   | 0.0   | 0.0   | 0.0   | 0.0   | 0.0   | 0.0   | 0.0   |
| Mmrn1   | 0.0   | 0.0   | 0.0   | 0.0   | 0.0   | 0.0   | 0.0   | 0.0   | 0.0   | 0.1   | 0.0   | 0.0   |
| Mmrn2   | 0.9   | 0.3   | 0.5   | 0.1   | 0.3   | 0.4   | 0.5   | 1.0   | 0.5   | 0.2   | 0.1   | 0.3   |
| Mms19   | 10.9  | 9.9   | 8.5   | 9.5   | 9.0   | 11.0  | 8.7   | 9.8   | 10.0  | 9.8   | 9.8   | 8.8   |
| Mms22l  | 1.3   | 1.9   | 2.0   | 0.9   | 1.9   | 1.1   | 2.2   | 1.4   | 2.1   | 1.3   | 1.4   | 1.2   |
| Mn1     | 6.3   | 9.8   | 9.6   | 5.0   | 6.6   | 6.7   | 9.6   | 11.9  | 10.7  | 6.0   | 6.3   | 7.1   |
| Mnat1   | 11.0  | 10.6  | 10.3  | 10.9  | 8.7   | 12.0  | 9.7   | 10.2  | 9.7   | 11.4  | 11.6  | 12.6  |
| Mnd1    | 0.5   | 0.4   | 0.6   | 0.6   | 0.3   | 0.6   | 0.6   | 0.5   | 0.5   | 0.3   | 0.5   | 0.5   |
| Mnda    | 21.4  | 17.2  | 28.3  | 22.8  | 21.8  | 13.3  | 20.6  | 22.3  | 16.0  | 13.9  | 17.8  | 26.1  |
| Mndal   | 5.8   | 4.2   | 8.4   | 9.0   | 6.4   | 5.5   | 4.7   | 3.5   | 3.7   | 2.9   | 3.5   | 7.5   |
| Mnf1    | 124.7 | 111.7 | 87.5  | 131.9 | 96.2  | 132.8 | 100.1 | 132.8 | 108.3 | 105.6 | 123.6 | 97.2  |
| Mns1    | 1.3   | 1.9   | 3.1   | 1.2   | 2.4   | 0.6   | 3.7   | 1.3   | 1.6   | 0.8   | 1.7   | 2.0   |
| Mnt     | 1.0   | 1.2   | 1.2   | 1.3   | 1.2   | 1.5   | 1.1   | 1.5   | 1.2   | 1.2   | 0.9   | 1.0   |
| Moap1   | 0.5   | 1.2   | 1.9   | 0.9   | 0.6   | 1.2   | 1.3   | 0.5   | 0.9   | 1.4   | 0.7   | 1.7   |
| Mob1a   | 56.1  | 55.9  | 51.3  | 53.9  | 60.3  | 52.4  | 53.7  | 53.2  | 61.1  | 58.8  | 61.3  | 57.2  |
| Mob1b   | 6.9   | 6.4   | 6.6   | 8.3   | 7.8   | 8.3   | 6.7   | 6.2   | 5.9   | 7.5   | 8.7   | 7.1   |
| Mob2    | 13.2  | 12.4  | 9.6   | 13.3  | 12.8  | 11.4  | 12.9  | 11.1  | 10.8  | 12.5  | 12.3  | 12.9  |
| Mob3a   | 13.0  | 12.8  | 11.1  | 15.8  | 17.8  | 12.2  | 18.5  | 14.0  | 15.0  | 14.4  | 18.2  | 14.3  |
| Mob3b   | 0.1   | 0.1   | 0.0   | 0.1   | 0.1   | 0.2   | 0.1   | 0.1   | 0.1   | 0.1   | 0.1   | 0.1   |
| Mob3c   | 4.5   | 3.6   | 3.9   | 5.0   | 4.5   | 3.8   | 4.4   | 3.5   | 3.7   | 4.2   | 4.4   | 3.8   |
| Mob4    | 18.8  | 21.3  | 18.4  | 21.8  | 19.4  | 20.3  | 19.6  | 20.6  | 22.6  | 23.5  | 25.6  | 24.7  |
| Mocos   | 9.2   | 5.6   | 4.9   | 10.9  | 7.4   | 7.9   | 5.4   | 4.3   | 4.2   | 5.7   | 4.7   | 5.2   |
| Mocs1   | 9.6   | 8.1   | 7.9   | 9.4   | 9.7   | 9.4   | 9.8   | 9.3   | 9.0   | 10.1  | 8.1   | 9.5   |
| Mocs2   | 24.7  | 18.8  | 16.8  | 21.4  | 16.3  | 19.3  | 18.8  | 15.2  | 17.5  | 18.9  | 18.8  | 19.8  |
| Mocs3   | 4.4   | 3.2   | 3.2   | 3.0   | 2.8   | 4.0   | 3.5   | 3.4   | 4.2   | 4.1   | 3.2   | 4.0   |
| Mog     | 0.1   | 0.0   | 0.1   | 0.0   | 0.0   | 0.1   | 0.0   | 0.0   | 0.0   | 0.0   | 0.0   | 0.0   |
| Mogat1  | 0.1   | 0.1   | 0.0   | 0.2   | 0.0   | 0.0   | 0.0   | 0.0   | 0.0   | 0.1   | 0.0   | 0.0   |
| Mogat2  | 2.0   | 0.9   | 1.3   | 1.2   | 0.7   | 0.7   | 0.4   | 0.8   | 0.8   | 2.1   | 1.1   | 0.8   |
| Mogs    | 9.9   | 10.1  | 9.6   | 11.0  | 11.3  | 11.3  | 10.5  | 10.9  | 13.9  | 12.8  | 10.5  | 10.3  |
| Mon1a   | 4.8   | 5.6   | 5.9   | 6.1   | 5.3   | 6.7   | 5.2   | 5.3   | 5.9   | 5.5   | 3.5   | 4.6   |
| Mon1b   | 4.3   | 4.3   | 4.7   | 4.9   | 4.4   | 4.4   | 4.8   | 4.6   | 4.4   | 4.4   | 4.3   | 4.1   |
| Mon2    | 13.6  | 14.4  | 13.4  | 12.8  | 13.8  | 13.6  | 14.0  | 13.3  | 13.2  | 12.0  | 13.1  | 12.3  |
| Morc1   | 0.2   | 0.1   | 0.1   | 0.1   | 0.1   | 0.4   | 0.1   | 0.0   | 0.1   | 0.1   | 0.1   | 0.0   |
| Morc2a  | 7.3   | 6.9   | 7.3   | 7.9   | 6.2   | 6.1   | 7.0   | 7.4   | 7.5   | 6.7   | 8.1   | 7.4   |
| Morc2b  | 0.0   | 0.1   | 0.0   | 0.1   | 0.0   | 0.1   | 0.0   | 0.0   | 0.0   | 0.0   | 0.0   | 0.0   |
| Morc3   | 10.3  | 10.7  | 10.6  | 9.8   | 11.4  | 8.5   | 9.8   | 8.4   | 11.3  | 12.3  | 12.5  | 12.6  |
| Morc4   | 3.6   | 3.5   | 3.0   | 4.3   | 2.6   | 5.2   | 3.4   | 2.9   | 3.5   | 3.7   | 4.3   | 4.1   |
| Morf4l1 | 56.3  | 57.2  | 64.7  | 63.1  | 56.5  | 58.9  | 59.0  | 65.2  | 54.5  | 59.8  | 63.7  | 65.9  |
| Morf4l2 | 175.5 | 160.0 | 168.2 | 186.8 | 162.1 | 182.0 | 192.0 | 196.9 | 178.2 | 196.2 | 212.6 | 216.8 |
| Morn1   | 0.6   | 0.8   | 0.9   | 0.8   | 0.4   | 1.0   | 0.7   | 0.9   | 0.5   | 0.6   | 1.0   | 0.5   |
| Morn2   | 10.8  | 6.4   | 6.4   | 9.9   | 7.1   | 10.7  | 6.1   | 6.7   | 4.1   | 8.8   | 8.8   | 6.7   |

Online Table 1

|           |       |       |       |       |       |       |       |       |       |       |       |       |
|-----------|-------|-------|-------|-------|-------|-------|-------|-------|-------|-------|-------|-------|
| Morn3     | 0.0   | 0.1   | 0.0   | 0.0   | 0.0   | 0.0   | 0.1   | 0.1   | 0.0   | 0.0   | 0.0   | 0.0   |
| Morn4     | 4.4   | 2.9   | 2.5   | 4.3   | 2.7   | 5.6   | 2.4   | 1.3   | 1.6   | 2.0   | 2.6   | 2.3   |
| Morn5     | 0.6   | 0.4   | 0.9   | 0.5   | 0.2   | 0.6   | 0.1   | 0.2   | 0.1   | 0.1   | 0.3   | 0.0   |
| Mospd1    | 10.0  | 8.8   | 7.2   | 9.2   | 7.5   | 8.7   | 6.2   | 6.5   | 6.6   | 8.7   | 8.1   | 8.3   |
| Mospd2    | 21.6  | 18.8  | 15.9  | 16.9  | 17.5  | 15.9  | 17.3  | 16.7  | 18.5  | 15.5  | 21.9  | 16.9  |
| Mospd3    | 0.2   | 0.4   | 0.5   | 0.2   | 0.6   | 0.9   | 0.5   | 0.8   | 0.6   | 0.7   | 0.3   | 0.5   |
| Mov10     | 5.3   | 6.4   | 6.9   | 5.7   | 6.1   | 5.2   | 5.5   | 5.9   | 6.0   | 3.9   | 4.0   | 5.3   |
| Mov10I1   | 0.0   | 0.0   | 0.0   | 0.0   | 0.0   | 0.0   | 0.0   | 0.0   | 0.0   | 0.0   | 0.0   | 0.0   |
| Moxd1     | 0.2   | 0.0   | 0.0   | 0.1   | 0.0   | 0.1   | 0.0   | 0.1   | 0.0   | 0.1   | 0.1   | 0.0   |
| Mpc1      | 39.5  | 30.0  | 39.0  | 40.8  | 31.0  | 45.1  | 32.8  | 32.8  | 34.1  | 26.9  | 38.1  | 42.0  |
| Mpc2      | 38.6  | 35.4  | 29.6  | 29.8  | 30.3  | 33.3  | 26.9  | 29.3  | 38.5  | 40.7  | 30.2  | 33.6  |
| Mpdu1     | 5.3   | 5.1   | 5.1   | 7.1   | 7.2   | 5.3   | 6.0   | 7.5   | 6.4   | 6.4   | 6.2   | 6.9   |
| Mpdz      | 25.7  | 29.2  | 29.1  | 31.9  | 22.1  | 32.9  | 26.9  | 27.6  | 23.0  | 22.6  | 28.0  | 22.9  |
| Mpeg1     | 5.7   | 0.3   | 0.7   | 39.9  | 72.1  | 0.2   | 6.6   | 1.2   | 1.3   | 4.4   | 1.6   | 3.4   |
| Mpg       | 10.7  | 8.5   | 7.2   | 8.5   | 8.6   | 7.7   | 9.0   | 8.8   | 8.7   | 10.1  | 8.8   | 8.1   |
| Mphosph10 | 16.5  | 15.0  | 15.7  | 19.8  | 14.7  | 15.2  | 15.8  | 13.4  | 12.2  | 14.0  | 18.4  | 16.2  |
| Mphosph6  | 11.0  | 8.1   | 12.3  | 13.2  | 11.7  | 10.3  | 12.6  | 12.3  | 11.2  | 10.5  | 14.0  | 12.1  |
| Mphosph8  | 14.0  | 13.5  | 14.0  | 15.0  | 12.8  | 13.4  | 13.6  | 12.6  | 11.7  | 12.3  | 15.9  | 16.1  |
| Mphosph9  | 0.7   | 0.9   | 1.1   | 0.8   | 1.1   | 0.7   | 0.9   | 1.0   | 0.9   | 0.9   | 1.1   | 0.8   |
| Mpi       | 9.3   | 9.1   | 8.6   | 9.0   | 8.1   | 8.8   | 8.7   | 8.4   | 7.0   | 7.8   | 8.8   | 7.5   |
| Mplkip    | 2.0   | 2.0   | 2.2   | 2.7   | 2.5   | 2.4   | 2.4   | 2.5   | 2.2   | 2.9   | 2.6   | 3.1   |
| Mpnd      | 20.5  | 20.7  | 20.5  | 18.0  | 15.3  | 23.7  | 17.0  | 20.2  | 20.7  | 16.8  | 14.5  | 18.2  |
| Mpo       | 0.0   | 0.0   | 0.1   | 0.0   | 0.0   | 0.0   | 0.0   | 0.0   | 0.0   | 0.1   | 0.0   | 0.0   |
| Mpp1      | 44.5  | 42.3  | 39.2  | 43.4  | 37.8  | 40.1  | 31.2  | 28.6  | 34.1  | 34.9  | 38.2  | 36.8  |
| Mpp2      | 2.2   | 2.8   | 3.0   | 1.3   | 1.6   | 1.4   | 2.0   | 1.9   | 1.4   | 4.0   | 2.4   | 2.3   |
| Mpp3      | 0.0   | 0.0   | 0.0   | 0.0   | 0.0   | 0.0   | 0.0   | 0.0   | 0.0   | 0.0   | 0.0   | 0.0   |
| Mpp4      | 0.1   | 0.0   | 0.1   | 0.1   | 0.1   | 0.2   | 0.0   | 0.1   | 0.1   | 0.1   | 0.2   | 0.1   |
| Mpp5      | 14.5  | 16.8  | 18.2  | 14.6  | 12.1  | 13.9  | 14.4  | 13.7  | 13.2  | 17.0  | 19.0  | 19.3  |
| Mpp6      | 8.7   | 7.2   | 7.2   | 9.0   | 9.3   | 7.7   | 7.2   | 5.7   | 5.6   | 8.8   | 8.1   | 7.9   |
| Mpp7      | 3.6   | 4.0   | 3.8   | 3.1   | 2.9   | 2.7   | 2.8   | 3.0   | 2.5   | 2.8   | 3.3   | 2.9   |
| Mppe1     | 6.4   | 5.8   | 6.2   | 6.3   | 5.2   | 6.2   | 7.5   | 6.8   | 6.5   | 5.8   | 5.6   | 7.6   |
| Mpped1    | 0.0   | 0.0   | 0.0   | 0.1   | 0.0   | 0.0   | 0.0   | 0.0   | 0.0   | 0.0   | 0.0   | 0.0   |
| Mpped2    | 0.1   | 0.1   | 0.1   | 0.3   | 0.1   | 0.4   | 0.2   | 0.2   | 0.1   | 0.1   | 0.1   | 0.1   |
| Mprip     | 57.8  | 54.2  | 46.6  | 57.3  | 53.1  | 59.1  | 61.1  | 54.9  | 59.1  | 58.3  | 65.7  | 59.6  |
| Mpst      | 13.0  | 13.9  | 15.4  | 8.9   | 11.7  | 13.5  | 10.4  | 15.8  | 13.3  | 13.2  | 13.3  | 11.3  |
| Mpv17     | 30.6  | 22.7  | 23.2  | 30.8  | 23.9  | 28.7  | 27.3  | 23.7  | 23.9  | 27.6  | 29.4  | 27.5  |
| Mpv17I1   | 2.1   | 2.1   | 2.5   | 2.8   | 2.2   | 2.3   | 2.5   | 2.3   | 1.8   | 1.9   | 2.5   | 3.0   |
| Mpv17I2   | 20.6  | 15.1  | 12.7  | 17.3  | 14.1  | 18.3  | 16.1  | 15.7  | 18.5  | 15.6  | 18.2  | 16.6  |
| Mpz       | 0.0   | 0.0   | 0.0   | 0.0   | 0.1   | 0.0   | 0.0   | 0.0   | 0.0   | 0.0   | 0.0   | 0.0   |
| MpzI1     | 5.5   | 9.2   | 9.7   | 4.7   | 8.8   | 7.1   | 10.4  | 12.0  | 11.8  | 7.8   | 7.7   | 7.5   |
| MpzI2     | 0.2   | 0.1   | 0.1   | 0.1   | 0.1   | 0.0   | 0.0   | 0.1   | 0.1   | 0.6   | 0.3   | 0.3   |
| MpzI3     | 3.1   | 2.0   | 1.8   | 2.5   | 1.2   | 2.0   | 2.6   | 1.5   | 1.9   | 2.2   | 2.0   | 1.7   |
| Mr1       | 11.8  | 10.7  | 11.6  | 11.7  | 8.0   | 15.3  | 9.0   | 9.3   | 7.9   | 8.1   | 11.3  | 9.7   |
| Mrap      | 5.0   | 5.8   | 8.1   | 4.5   | 4.4   | 6.3   | 4.4   | 4.8   | 3.1   | 3.8   | 3.9   | 5.2   |
| Mras      | 13.4  | 10.1  | 9.1   | 12.6  | 8.0   | 12.2  | 11.7  | 8.9   | 9.7   | 15.2  | 16.3  | 12.6  |
| Mrc1      | 0.4   | 0.1   | 0.1   | 1.8   | 0.8   | 0.0   | 0.1   | 0.2   | 0.1   | 0.0   | 0.1   | 0.1   |
| Mrc2      | 52.3  | 55.2  | 48.2  | 56.7  | 63.5  | 64.1  | 81.3  | 50.7  | 82.1  | 52.8  | 47.9  | 65.7  |
| Mre11a    | 6.9   | 7.4   | 7.2   | 7.4   | 7.6   | 7.0   | 8.1   | 6.5   | 6.5   | 6.7   | 8.2   | 6.3   |
| Mreg      | 1.0   | 1.0   | 1.2   | 0.8   | 1.3   | 0.6   | 0.6   | 0.2   | 0.3   | 0.3   | 0.2   | 0.3   |
| Mrfap1    | 154.2 | 138.4 | 148.9 | 142.0 | 139.5 | 151.0 | 149.4 | 154.5 | 148.4 | 172.1 | 156.0 | 169.7 |
| Mrgbp     | 7.0   | 5.8   | 6.0   | 5.9   | 5.1   | 5.9   | 6.8   | 6.5   | 4.6   | 5.1   | 5.5   | 6.1   |
| Mrgpre    | 2.5   | 1.8   | 1.4   | 5.0   | 2.8   | 4.1   | 3.0   | 1.6   | 2.0   | 1.5   | 1.8   | 2.0   |
| Mrgprf    | 5.8   | 8.7   | 10.3  | 4.3   | 5.9   | 3.3   | 9.6   | 16.6  | 11.8  | 5.5   | 9.1   | 6.4   |
| Mri1      | 8.5   | 6.3   | 5.5   | 7.7   | 6.3   | 6.5   | 5.8   | 5.4   | 4.7   | 5.4   | 5.6   | 5.3   |
| Mrm1      | 4.4   | 3.9   | 3.5   | 4.5   | 3.3   | 3.6   | 4.0   | 4.0   | 4.2   | 2.9   | 3.6   | 3.9   |
| Mro       | 0.0   | 0.0   | 0.2   | 0.0   | 0.0   | 0.0   | 0.0   | 0.1   | 0.0   | 0.2   | 0.0   | 0.0   |
| Mroh1     | 21.1  | 14.2  | 9.8   | 22.9  | 17.2  | 23.6  | 12.6  | 11.0  | 12.1  | 15.4  | 13.2  | 12.7  |

Online Table 1

|        |       |       |      |       |       |       |       |       |       |       |       |       |
|--------|-------|-------|------|-------|-------|-------|-------|-------|-------|-------|-------|-------|
| Mroh2a | 0.0   | 0.0   | 0.0  | 0.1   | 0.0   | 0.0   | 0.0   | 0.0   | 0.0   | 0.2   | 0.1   | 0.0   |
| Mroh8  | 0.0   | 0.1   | 0.1  | 0.2   | 0.0   | 0.1   | 0.1   | 0.1   | 0.1   | 0.1   | 0.0   | 0.0   |
| Mrp63  | 10.6  | 8.5   | 7.4  | 9.6   | 8.7   | 8.2   | 7.5   | 7.7   | 8.2   | 9.1   | 9.4   | 7.8   |
| Mrpl1  | 6.3   | 5.5   | 4.9  | 7.3   | 4.7   | 6.0   | 3.9   | 4.1   | 3.8   | 5.6   | 4.6   | 4.5   |
| Mrpl10 | 23.4  | 23.7  | 20.7 | 23.5  | 21.2  | 25.7  | 20.5  | 22.3  | 22.0  | 21.8  | 23.7  | 19.1  |
| Mrpl11 | 6.3   | 5.3   | 5.6  | 6.3   | 4.7   | 6.4   | 4.5   | 5.4   | 5.5   | 5.9   | 5.2   | 5.8   |
| Mrpl12 | 30.3  | 29.3  | 23.6 | 28.3  | 28.6  | 31.7  | 31.7  | 28.7  | 26.2  | 32.6  | 30.2  | 28.4  |
| Mrpl13 | 69.5  | 61.8  | 53.2 | 69.8  | 57.8  | 69.3  | 57.8  | 51.6  | 49.0  | 53.9  | 56.0  | 56.5  |
| Mrpl14 | 15.6  | 17.0  | 15.6 | 16.7  | 19.1  | 18.4  | 14.2  | 14.2  | 16.8  | 19.9  | 14.8  | 18.4  |
| Mrpl15 | 9.5   | 8.9   | 8.5  | 9.9   | 8.5   | 9.6   | 8.3   | 9.7   | 8.7   | 8.8   | 9.4   | 8.6   |
| Mrpl16 | 10.3  | 10.5  | 9.6  | 10.0  | 10.3  | 13.2  | 9.8   | 10.2  | 9.5   | 12.0  | 9.9   | 10.3  |
| Mrpl17 | 5.5   | 4.6   | 4.2  | 4.3   | 4.3   | 4.5   | 4.0   | 4.4   | 3.9   | 5.2   | 4.5   | 4.6   |
| Mrpl18 | 38.7  | 37.6  | 39.9 | 36.4  | 36.0  | 42.9  | 38.1  | 31.2  | 34.1  | 39.3  | 40.0  | 41.0  |
| Mrpl19 | 3.9   | 3.4   | 3.0  | 4.0   | 3.4   | 3.5   | 3.6   | 3.1   | 3.0   | 3.5   | 3.4   | 3.3   |
| Mrpl2  | 21.4  | 19.7  | 17.7 | 26.1  | 16.6  | 21.6  | 20.4  | 18.4  | 18.2  | 18.8  | 18.2  | 18.1  |
| Mrpl20 | 61.3  | 59.3  | 51.1 | 64.9  | 63.5  | 59.4  | 61.4  | 56.8  | 67.7  | 62.0  | 60.6  | 57.5  |
| Mrpl21 | 14.0  | 13.4  | 12.6 | 13.6  | 11.2  | 15.7  | 12.2  | 12.2  | 12.2  | 13.7  | 14.7  | 12.5  |
| Mrpl22 | 17.6  | 18.7  | 17.5 | 19.9  | 16.7  | 21.4  | 14.9  | 14.7  | 15.0  | 18.5  | 17.0  | 16.8  |
| Mrpl23 | 33.6  | 29.7  | 29.4 | 38.2  | 33.0  | 44.7  | 32.9  | 37.8  | 33.0  | 33.4  | 34.3  | 35.0  |
| Mrpl24 | 33.0  | 28.8  | 30.3 | 33.6  | 26.3  | 37.7  | 30.0  | 33.1  | 28.6  | 34.0  | 32.8  | 35.9  |
| Mrpl27 | 34.6  | 28.2  | 25.5 | 34.4  | 28.1  | 28.9  | 28.1  | 26.1  | 25.2  | 28.8  | 28.7  | 31.0  |
| Mrpl28 | 26.7  | 26.6  | 19.7 | 29.8  | 24.3  | 27.5  | 23.5  | 23.6  | 23.5  | 26.9  | 22.1  | 19.4  |
| Mrpl3  | 15.9  | 12.1  | 13.9 | 15.4  | 14.3  | 13.4  | 13.5  | 15.9  | 14.9  | 15.2  | 16.7  | 15.3  |
| Mrpl30 | 66.6  | 58.2  | 49.9 | 56.6  | 48.2  | 61.9  | 38.3  | 52.4  | 43.8  | 55.1  | 53.3  | 49.0  |
| Mrpl32 | 30.2  | 29.4  | 34.9 | 33.8  | 27.5  | 31.6  | 33.4  | 31.8  | 25.7  | 27.8  | 37.5  | 36.1  |
| Mrpl33 | 164.2 | 122.8 | 85.9 | 138.4 | 123.0 | 140.0 | 103.2 | 103.2 | 116.5 | 104.3 | 120.8 | 115.9 |
| Mrpl34 | 30.0  | 23.4  | 25.2 | 29.0  | 26.8  | 32.7  | 26.8  | 28.4  | 26.0  | 32.9  | 26.1  | 27.1  |
| Mrpl35 | 5.8   | 4.5   | 3.7  | 6.2   | 4.5   | 5.6   | 4.1   | 4.2   | 3.6   | 4.5   | 4.9   | 4.0   |
| Mrpl36 | 22.2  | 19.9  | 16.7 | 25.6  | 23.5  | 22.8  | 20.1  | 20.5  | 23.9  | 27.2  | 22.8  | 21.2  |
| Mrpl37 | 13.8  | 13.0  | 11.7 | 11.0  | 12.2  | 11.5  | 12.1  | 12.9  | 12.3  | 10.2  | 10.9  | 11.0  |
| Mrpl38 | 15.1  | 13.5  | 12.3 | 15.6  | 12.9  | 17.7  | 13.4  | 11.9  | 10.7  | 15.4  | 15.3  | 11.7  |
| Mrpl39 | 18.7  | 17.1  | 17.0 | 18.8  | 15.4  | 17.5  | 15.5  | 15.9  | 13.9  | 16.4  | 16.9  | 17.8  |
| Mrpl4  | 16.8  | 17.7  | 17.3 | 21.8  | 17.8  | 18.7  | 16.7  | 18.5  | 16.1  | 17.5  | 14.7  | 14.7  |
| Mrpl40 | 16.5  | 15.3  | 15.6 | 19.1  | 16.0  | 16.1  | 13.9  | 15.5  | 14.8  | 13.2  | 13.4  | 14.6  |
| Mrpl41 | 7.7   | 7.0   | 6.6  | 10.6  | 5.9   | 9.1   | 7.1   | 7.0   | 5.7   | 6.9   | 8.3   | 7.9   |
| Mrpl42 | 60.6  | 45.9  | 51.9 | 75.5  | 48.2  | 69.5  | 48.5  | 52.6  | 42.5  | 49.3  | 54.9  | 51.2  |
| Mrpl43 | 22.8  | 21.5  | 21.5 | 23.1  | 22.0  | 23.7  | 20.8  | 23.7  | 22.1  | 20.6  | 23.8  | 23.5  |
| Mrpl44 | 12.4  | 13.7  | 12.3 | 11.9  | 11.9  | 11.5  | 10.6  | 11.3  | 11.9  | 11.8  | 11.8  | 10.3  |
| Mrpl45 | 9.2   | 7.9   | 8.2  | 8.4   | 8.4   | 9.3   | 8.4   | 8.6   | 8.7   | 9.6   | 8.5   | 9.2   |
| Mrpl46 | 7.8   | 9.3   | 10.2 | 9.5   | 8.6   | 8.6   | 7.5   | 10.6  | 8.7   | 9.5   | 9.1   | 7.9   |
| Mrpl47 | 10.9  | 10.6  | 5.7  | 9.8   | 8.4   | 11.4  | 7.9   | 6.9   | 8.4   | 9.6   | 10.1  | 9.0   |
| Mrpl48 | 30.6  | 24.1  | 22.1 | 31.8  | 24.3  | 25.6  | 27.2  | 27.9  | 24.8  | 31.1  | 32.0  | 29.7  |
| Mrpl49 | 14.1  | 12.2  | 12.7 | 14.8  | 12.1  | 13.1  | 14.0  | 13.1  | 13.6  | 14.7  | 15.1  | 12.9  |
| Mrpl50 | 8.5   | 8.8   | 8.5  | 9.4   | 9.3   | 9.0   | 8.6   | 8.6   | 9.5   | 9.9   | 10.3  | 9.4   |
| Mrpl51 | 32.8  | 28.1  | 28.3 | 35.4  | 26.4  | 35.1  | 33.3  | 27.0  | 26.4  | 27.6  | 30.2  | 33.5  |
| Mrpl52 | 105.2 | 83.3  | 69.7 | 96.4  | 99.6  | 98.5  | 95.0  | 83.6  | 92.5  | 106.5 | 100.0 | 83.3  |
| Mrpl53 | 42.8  | 39.0  | 33.3 | 40.9  | 37.1  | 32.9  | 36.3  | 37.1  | 37.9  | 42.7  | 40.3  | 38.1  |
| Mrpl54 | 67.6  | 52.1  | 46.4 | 59.0  | 52.1  | 54.7  | 69.8  | 69.0  | 58.5  | 68.4  | 72.3  | 67.4  |
| Mrpl55 | 16.3  | 13.6  | 10.9 | 16.3  | 12.5  | 16.9  | 11.5  | 12.1  | 11.3  | 11.1  | 9.6   | 10.2  |
| Mrpl9  | 17.7  | 12.9  | 11.3 | 14.2  | 13.0  | 16.7  | 13.7  | 12.8  | 13.0  | 15.9  | 16.2  | 15.5  |
| Mrps10 | 21.8  | 18.7  | 17.4 | 23.9  | 17.3  | 21.5  | 17.4  | 15.4  | 14.4  | 17.1  | 17.7  | 16.0  |
| Mrps11 | 8.7   | 7.9   | 7.9  | 8.3   | 8.6   | 7.4   | 6.3   | 9.6   | 7.7   | 8.6   | 8.2   | 7.9   |
| Mrps12 | 58.2  | 58.5  | 47.7 | 58.5  | 58.3  | 47.8  | 62.1  | 66.8  | 61.0  | 70.1  | 64.8  | 57.4  |
| Mrps14 | 14.2  | 12.5  | 9.2  | 10.7  | 11.7  | 12.0  | 8.8   | 9.5   | 11.2  | 15.1  | 9.9   | 10.7  |
| Mrps15 | 25.2  | 23.8  | 24.2 | 27.2  | 21.8  | 28.8  | 26.4  | 29.5  | 23.9  | 25.8  | 31.9  | 24.3  |
| Mrps16 | 45.7  | 40.5  | 43.1 | 39.0  | 43.7  | 41.4  | 42.4  | 43.0  | 46.1  | 43.6  | 40.5  | 41.0  |
| Mrps17 | 18.2  | 17.8  | 15.5 | 17.4  | 15.5  | 16.3  | 15.5  | 17.7  | 17.5  | 18.8  | 17.4  | 17.0  |

Online Table 1

|         |       |       |       |       |       |       |       |       |       |       |       |       |
|---------|-------|-------|-------|-------|-------|-------|-------|-------|-------|-------|-------|-------|
| Mrps18a | 24.1  | 18.5  | 17.7  | 25.7  | 19.4  | 28.4  | 18.1  | 17.6  | 19.9  | 21.0  | 17.9  | 17.7  |
| Mrps18b | 21.8  | 18.1  | 15.5  | 26.9  | 17.7  | 20.1  | 17.1  | 18.3  | 14.7  | 17.6  | 20.3  | 17.0  |
| Mrps18c | 43.1  | 39.7  | 33.2  | 41.3  | 37.7  | 39.3  | 25.8  | 34.7  | 35.6  | 42.4  | 35.2  | 34.7  |
| Mrps2   | 9.0   | 8.3   | 8.2   | 11.3  | 9.0   | 9.6   | 9.3   | 8.5   | 7.0   | 7.7   | 8.3   | 8.4   |
| Mrps21  | 153.3 | 146.5 | 145.7 | 157.5 | 136.0 | 176.7 | 147.3 | 161.9 | 129.0 | 149.9 | 154.7 | 156.1 |
| Mrps22  | 12.4  | 13.6  | 10.8  | 14.7  | 10.4  | 10.7  | 11.6  | 10.7  | 10.5  | 11.1  | 11.7  | 10.1  |
| Mrps23  | 25.5  | 22.6  | 23.3  | 26.3  | 25.3  | 26.2  | 27.0  | 21.1  | 21.0  | 25.1  | 28.4  | 23.5  |
| Mrps24  | 22.1  | 19.9  | 17.6  | 15.0  | 17.2  | 19.2  | 17.7  | 20.3  | 20.3  | 22.0  | 17.2  | 19.2  |
| Mrps25  | 6.7   | 6.3   | 5.9   | 7.3   | 6.2   | 6.5   | 5.7   | 6.2   | 6.6   | 6.4   | 6.8   | 6.7   |
| Mrps26  | 20.4  | 18.7  | 16.6  | 17.9  | 17.3  | 18.0  | 17.5  | 17.3  | 18.4  | 20.4  | 17.8  | 16.8  |
| Mrps27  | 6.8   | 6.5   | 6.9   | 6.9   | 6.4   | 7.6   | 7.2   | 7.2   | 5.4   | 6.7   | 6.5   | 5.7   |
| Mrps28  | 17.8  | 16.5  | 14.2  | 19.6  | 17.6  | 15.0  | 18.2  | 19.1  | 18.2  | 17.9  | 17.7  | 16.7  |
| Mrps30  | 14.3  | 13.0  | 12.0  | 11.2  | 10.2  | 12.1  | 13.9  | 12.2  | 12.4  | 13.2  | 11.6  | 12.6  |
| Mrps31  | 8.8   | 9.9   | 10.2  | 9.1   | 8.3   | 8.9   | 9.0   | 8.4   | 7.9   | 8.1   | 9.7   | 9.2   |
| Mrps33  | 33.6  | 25.7  | 23.8  | 34.0  | 29.0  | 34.2  | 28.6  | 27.6  | 24.5  | 26.8  | 30.5  | 29.6  |
| Mrps34  | 20.1  | 19.0  | 19.2  | 20.0  | 16.8  | 22.4  | 19.9  | 21.6  | 17.0  | 25.6  | 18.2  | 20.1  |
| Mrps35  | 11.1  | 10.3  | 10.7  | 10.5  | 8.7   | 10.2  | 10.0  | 11.3  | 8.1   | 9.4   | 12.0  | 10.6  |
| Mrps36  | 22.2  | 20.7  | 19.1  | 25.9  | 21.9  | 29.3  | 22.7  | 26.9  | 24.7  | 23.5  | 28.1  | 25.0  |
| Mrps5   | 13.5  | 13.4  | 14.0  | 17.6  | 11.5  | 14.8  | 14.1  | 13.5  | 10.2  | 11.4  | 13.1  | 12.8  |
| Mrps6   | 37.1  | 37.4  | 38.3  | 35.7  | 31.5  | 39.5  | 28.8  | 38.9  | 26.9  | 30.8  | 32.4  | 28.2  |
| Mrps7   | 23.2  | 18.7  | 18.8  | 22.9  | 21.0  | 22.2  | 20.9  | 19.2  | 20.7  | 27.6  | 24.9  | 21.2  |
| Mrps9   | 16.9  | 14.4  | 13.1  | 17.6  | 11.6  | 18.1  | 12.8  | 12.4  | 11.3  | 13.6  | 14.0  | 13.4  |
| Mrrf    | 14.1  | 12.2  | 9.6   | 14.4  | 11.1  | 12.7  | 11.4  | 11.1  | 10.3  | 13.8  | 15.1  | 13.6  |
| Mrs2    | 10.0  | 7.7   | 7.9   | 8.1   | 8.5   | 7.7   | 8.4   | 7.5   | 7.8   | 6.9   | 7.0   | 7.4   |
| Mrto4   | 24.1  | 18.7  | 14.4  | 23.9  | 22.4  | 23.6  | 20.1  | 18.4  | 16.5  | 22.2  | 21.8  | 17.6  |
| Mrvi1   | 1.5   | 1.2   | 1.0   | 3.1   | 2.3   | 2.1   | 1.8   | 0.6   | 1.3   | 2.3   | 2.2   | 1.3   |
| Ms4a2   | 0.0   | 0.0   | 0.0   | 0.0   | 0.0   | 0.0   | 0.0   | 0.0   | 0.0   | 0.1   | 0.1   | 0.0   |
| Ms4a4b  | 0.1   | 0.0   | 0.1   | 0.0   | 0.0   | 0.0   | 0.3   | 0.0   | 0.0   | 0.1   | 0.0   | 0.0   |
| Ms4a4c  | 0.0   | 0.0   | 0.1   | 0.0   | 0.1   | 0.0   | 0.1   | 0.0   | 0.0   | 0.1   | 0.0   | 0.0   |
| Ms4a4d  | 17.5  | 24.8  | 40.1  | 18.9  | 33.7  | 7.4   | 39.0  | 40.7  | 34.8  | 15.4  | 21.1  | 28.3  |
| Ms4a6b  | 0.3   | 0.0   | 0.0   | 2.1   | 3.2   | 0.1   | 0.6   | 0.2   | 0.2   | 0.3   | 0.0   | 0.1   |
| Ms4a6c  | 0.8   | 0.1   | 0.1   | 4.2   | 6.0   | 0.3   | 2.0   | 0.5   | 0.5   | 0.7   | 0.3   | 0.6   |
| Ms4a6d  | 2.3   | 0.2   | 0.1   | 16.8  | 29.4  | 0.0   | 3.7   | 0.9   | 0.7   | 1.8   | 0.9   | 1.5   |
| Ms4a7   | 5.0   | 0.0   | 0.3   | 45.9  | 68.4  | 0.0   | 6.9   | 1.1   | 0.9   | 4.9   | 1.6   | 2.6   |
| Msantd1 | 0.3   | 0.3   | 0.2   | 0.2   | 0.2   | 0.2   | 0.3   | 0.3   | 0.3   | 0.2   | 0.1   | 0.2   |
| Msantd2 | 2.5   | 2.6   | 3.2   | 1.8   | 2.1   | 2.2   | 2.4   | 2.2   | 2.2   | 1.9   | 1.7   | 2.2   |
| Msantd3 | 10.0  | 9.3   | 8.8   | 13.8  | 8.6   | 11.1  | 12.5  | 8.7   | 7.9   | 7.8   | 10.5  | 8.5   |
| Msantd4 | 29.8  | 27.2  | 25.6  | 32.2  | 25.4  | 29.5  | 28.3  | 22.6  | 26.0  | 28.5  | 32.5  | 31.8  |
| Msc     | 0.3   | 0.4   | 0.7   | 0.3   | 0.8   | 0.2   | 0.4   | 1.0   | 1.0   | 0.1   | 0.3   | 0.4   |
| Msh2    | 3.7   | 4.5   | 5.5   | 3.5   | 3.9   | 4.2   | 3.5   | 4.7   | 3.7   | 3.9   | 4.5   | 4.0   |
| Msh3    | 1.9   | 1.6   | 1.7   | 1.9   | 1.6   | 1.8   | 1.4   | 1.6   | 1.2   | 1.9   | 1.6   | 1.6   |
| Msh4    | 0.0   | 0.0   | 0.0   | 0.1   | 0.1   | 0.1   | 0.0   | 0.1   | 0.1   | 0.0   | 0.1   | 0.0   |
| Msh5    | 0.1   | 0.2   | 0.1   | 0.1   | 0.2   | 0.1   | 0.1   | 0.1   | 0.1   | 0.1   | 0.1   | 0.1   |
| Msh6    | 11.9  | 13.3  | 14.8  | 7.7   | 11.4  | 11.0  | 11.7  | 10.5  | 10.0  | 14.1  | 12.7  | 11.9  |
| Msi1    | 0.3   | 0.3   | 0.2   | 0.1   | 0.1   | 0.1   | 0.2   | 0.2   | 0.4   | 0.4   | 0.5   | 0.3   |
| Msi2    | 21.8  | 19.9  | 21.9  | 26.5  | 21.8  | 22.1  | 21.7  | 16.1  | 19.1  | 17.8  | 22.4  | 24.4  |
| Msl1    | 11.4  | 13.6  | 13.9  | 12.1  | 11.9  | 12.1  | 11.0  | 12.0  | 11.6  | 10.3  | 11.6  | 11.7  |
| Msl2    | 2.4   | 2.8   | 3.8   | 3.0   | 3.1   | 2.7   | 3.0   | 2.6   | 2.9   | 3.6   | 3.3   | 3.4   |
| Msl3    | 16.2  | 16.0  | 14.9  | 15.8  | 15.0  | 13.2  | 14.9  | 15.3  | 13.3  | 15.9  | 16.9  | 16.4  |
| Msl3l2  | 1.4   | 1.5   | 1.9   | 1.0   | 1.5   | 1.3   | 1.2   | 1.5   | 1.6   | 1.5   | 1.6   | 1.4   |
| Msln    | 8.4   | 0.9   | 0.2   | 0.7   | 0.2   | 0.5   | 0.3   | 1.8   | 0.9   | 23.3  | 13.3  | 4.3   |
| Mslnl   | 0.1   | 0.0   | 0.0   | 0.0   | 0.0   | 0.1   | 0.0   | 0.0   | 0.0   | 0.1   | 0.0   | 0.0   |
| Msmmp   | 3.2   | 3.6   | 2.5   | 3.3   | 3.7   | 4.1   | 4.3   | 2.8   | 3.2   | 3.1   | 3.7   | 2.0   |
| Msn     | 114.2 | 95.2  | 78.5  | 172.0 | 165.6 | 138.0 | 115.3 | 87.2  | 81.3  | 103.1 | 115.2 | 100.3 |
| Msr1    | 2.6   | 0.1   | 0.2   | 19.1  | 29.7  | 0.1   | 2.2   | 0.7   | 0.5   | 1.1   | 0.7   | 1.5   |
| Msr4    | 3.4   | 2.0   | 2.3   | 4.2   | 5.0   | 3.1   | 3.4   | 3.5   | 2.6   | 2.9   | 3.6   | 2.6   |
| Msrbl1  | 41.0  | 35.3  | 36.9  | 49.2  | 54.0  | 31.9  | 53.4  | 52.9  | 55.3  | 48.9  | 64.6  | 47.0  |

Online Table 1

|         |       |       |       |       |       |       |       |       |       |       |       |       |
|---------|-------|-------|-------|-------|-------|-------|-------|-------|-------|-------|-------|-------|
| Msrb2   | 17.4  | 12.3  | 12.1  | 18.1  | 13.1  | 12.0  | 15.1  | 12.4  | 12.2  | 10.7  | 13.8  | 15.0  |
| Msrb3   | 60.7  | 51.8  | 52.0  | 64.2  | 55.5  | 52.9  | 68.1  | 49.1  | 62.2  | 62.1  | 76.1  | 69.7  |
| Mss51   | 0.1   | 0.2   | 0.1   | 0.1   | 0.0   | 0.1   | 0.1   | 0.1   | 0.3   | 0.2   | 0.2   | 0.1   |
| Mst1    | 0.4   | 0.2   | 0.2   | 0.2   | 0.2   | 0.2   | 0.3   | 0.1   | 0.1   | 0.1   | 0.2   | 0.1   |
| Mst1r   | 6.8   | 9.7   | 8.5   | 5.3   | 6.4   | 5.4   | 7.0   | 7.6   | 6.8   | 8.6   | 7.2   | 7.0   |
| Msto1   | 13.1  | 11.3  | 12.5  | 15.8  | 12.6  | 12.8  | 14.2  | 14.0  | 13.0  | 13.4  | 15.3  | 12.1  |
| Msx1    | 1.2   | 1.1   | 0.9   | 0.8   | 0.7   | 0.9   | 0.8   | 0.8   | 0.7   | 0.9   | 0.7   | 0.7   |
| Msx1as  | 1.7   | 1.5   | 1.8   | 1.6   | 1.0   | 1.4   | 1.6   | 1.4   | 1.1   | 1.3   | 1.2   | 1.3   |
| Msx2    | 0.2   | 0.1   | 0.1   | 0.2   | 0.1   | 0.1   | 0.0   | 0.0   | 0.0   | 0.1   | 0.1   | 0.1   |
| Mt1     | 301.6 | 237.2 | 232.8 | 294.0 | 235.8 | 383.9 | 208.3 | 280.6 | 201.4 | 439.3 | 297.6 | 384.5 |
| Mt2     | 155.9 | 117.9 | 105.7 | 155.7 | 138.8 | 211.3 | 112.8 | 140.0 | 89.8  | 202.2 | 137.1 | 157.3 |
| Mt3     | 0.0   | 0.0   | 0.0   | 0.1   | 0.1   | 0.0   | 0.0   | 0.1   | 0.0   | 0.2   | 0.0   | 0.0   |
| Mta1    | 14.4  | 17.1  | 15.0  | 14.1  | 12.0  | 19.5  | 14.1  | 14.8  | 12.2  | 11.1  | 14.7  | 10.9  |
| Mta2    | 27.9  | 28.4  | 30.4  | 26.2  | 28.4  | 27.2  | 32.3  | 30.0  | 30.5  | 30.2  | 32.2  | 30.8  |
| Mta3    | 17.4  | 17.8  | 19.7  | 17.8  | 13.9  | 19.2  | 19.7  | 19.7  | 15.1  | 12.3  | 16.9  | 17.9  |
| Mtag2   | 0.1   | 0.2   | 0.2   | 0.3   | 0.0   | 0.2   | 0.1   | 0.1   | 0.2   | 0.1   | 0.1   | 0.1   |
| Mtap    | 31.3  | 23.7  | 19.3  | 33.1  | 23.2  | 35.3  | 26.8  | 21.2  | 24.1  | 31.6  | 31.1  | 29.3  |
| Mtap7d3 | 1.1   | 1.5   | 1.9   | 1.4   | 1.2   | 1.8   | 1.1   | 1.4   | 1.2   | 0.9   | 1.2   | 0.8   |
| Mtbp    | 1.9   | 2.1   | 3.1   | 1.7   | 2.4   | 1.5   | 3.0   | 3.2   | 2.7   | 1.9   | 2.9   | 2.3   |
| Mtch1   | 76.6  | 65.4  | 74.0  | 70.0  | 70.4  | 61.6  | 81.1  | 102.0 | 89.8  | 82.4  | 77.8  | 88.9  |
| Mtch2   | 47.8  | 43.1  | 37.0  | 42.6  | 38.2  | 38.8  | 36.8  | 44.2  | 42.4  | 41.9  | 45.4  | 43.0  |
| Mtcp1   | 3.8   | 4.9   | 2.9   | 2.2   | 3.4   | 4.4   | 4.5   | 4.6   | 3.5   | 3.3   | 4.0   | 3.5   |
| Mtdh    | 31.0  | 25.7  | 28.6  | 33.9  | 25.0  | 30.6  | 29.3  | 29.8  | 25.1  | 27.3  | 34.0  | 33.5  |
| Mterf   | 1.9   | 1.6   | 1.7   | 2.2   | 1.6   | 2.3   | 2.0   | 1.6   | 2.0   | 2.6   | 2.5   | 1.5   |
| Mterfd1 | 7.6   | 7.9   | 8.5   | 7.3   | 8.3   | 8.5   | 7.8   | 9.6   | 8.5   | 9.4   | 10.9  | 9.2   |
| Mterfd2 | 3.6   | 3.8   | 3.7   | 3.5   | 3.2   | 3.4   | 4.0   | 4.2   | 3.9   | 4.8   | 5.2   | 4.5   |
| Mterfd3 | 4.7   | 4.4   | 5.1   | 4.0   | 3.6   | 4.4   | 4.6   | 4.5   | 4.3   | 4.1   | 4.8   | 4.9   |
| Mtf1    | 3.1   | 3.6   | 3.4   | 3.4   | 3.8   | 3.1   | 4.0   | 3.1   | 3.2   | 3.1   | 3.4   | 3.2   |
| Mtf2    | 2.5   | 3.2   | 3.5   | 2.4   | 3.2   | 2.2   | 3.1   | 3.2   | 2.7   | 3.2   | 2.8   | 2.9   |
| Mtfmt   | 5.0   | 4.4   | 4.3   | 4.2   | 3.8   | 4.4   | 4.4   | 4.2   | 4.2   | 4.7   | 5.1   | 4.8   |
| Mtfp1   | 0.3   | 0.6   | 0.3   | 0.3   | 0.4   | 0.4   | 0.3   | 0.5   | 0.3   | 0.2   | 0.4   | 0.3   |
| Mtfr1   | 18.3  | 17.9  | 13.8  | 17.9  | 13.5  | 17.0  | 15.3  | 13.8  | 16.2  | 15.5  | 19.8  | 16.1  |
| Mtfr11  | 44.0  | 37.9  | 30.9  | 46.4  | 36.8  | 44.7  | 30.9  | 31.8  | 33.1  | 36.3  | 32.8  | 33.8  |
| Mtfr2   | 0.3   | 0.6   | 0.6   | 0.1   | 1.1   | 0.3   | 0.9   | 0.4   | 0.5   | 0.5   | 0.5   | 0.4   |
| Mtg1    | 4.4   | 3.9   | 2.8   | 5.4   | 3.3   | 4.2   | 3.6   | 3.8   | 4.1   | 3.6   | 4.2   | 3.3   |
| Mthfd1  | 23.0  | 19.9  | 19.4  | 17.4  | 18.1  | 18.5  | 19.3  | 16.9  | 16.3  | 22.3  | 20.5  | 20.9  |
| Mthfd11 | 5.5   | 3.9   | 3.7   | 5.0   | 4.8   | 5.3   | 5.6   | 5.8   | 4.3   | 3.3   | 4.7   | 3.3   |
| Mthfd2  | 25.7  | 18.3  | 14.4  | 25.2  | 21.5  | 25.7  | 22.7  | 30.1  | 28.9  | 16.3  | 27.9  | 15.6  |
| Mthfd21 | 2.7   | 2.2   | 2.7   | 4.5   | 3.0   | 3.3   | 3.3   | 2.5   | 2.7   | 2.6   | 2.6   | 3.6   |
| Mthfr   | 12.9  | 12.4  | 11.2  | 12.1  | 12.8  | 12.0  | 13.3  | 12.0  | 14.3  | 14.7  | 12.3  | 11.7  |
| Mthfs   | 7.1   | 7.6   | 6.8   | 6.6   | 8.0   | 6.9   | 6.5   | 7.1   | 7.9   | 6.3   | 6.6   | 7.7   |
| Mthfsd  | 7.0   | 7.0   | 7.2   | 9.6   | 6.6   | 7.4   | 6.8   | 8.4   | 8.5   | 8.0   | 8.7   | 6.6   |
| Mtif2   | 10.4  | 9.5   | 8.0   | 9.3   | 8.4   | 9.5   | 8.3   | 8.5   | 7.9   | 9.2   | 9.6   | 9.7   |
| Mtif3   | 3.8   | 3.2   | 3.5   | 4.1   | 3.2   | 4.4   | 3.0   | 3.3   | 2.9   | 3.6   | 4.0   | 3.7   |
| Mtl5    | 0.0   | 0.1   | 0.2   | 0.1   | 0.1   | 0.1   | 0.0   | 0.1   | 0.1   | 0.1   | 0.1   | 0.2   |
| Mtm1    | 3.8   | 3.9   | 3.1   | 3.6   | 3.3   | 5.3   | 2.5   | 3.1   | 3.6   | 3.3   | 3.2   | 3.6   |
| Mtmr1   | 5.6   | 5.2   | 5.5   | 5.4   | 4.7   | 5.2   | 4.5   | 3.9   | 4.7   | 4.5   | 5.2   | 5.0   |
| Mtmr10  | 7.5   | 6.2   | 5.1   | 8.9   | 6.3   | 7.3   | 6.7   | 5.2   | 5.1   | 6.7   | 6.3   | 6.4   |
| Mtmr11  | 7.8   | 8.7   | 8.5   | 7.8   | 7.0   | 10.1  | 8.7   | 6.5   | 7.6   | 6.9   | 6.7   | 6.3   |
| Mtmr12  | 5.6   | 5.9   | 5.6   | 4.7   | 5.1   | 5.4   | 5.9   | 5.9   | 5.3   | 5.1   | 6.0   | 5.9   |
| Mtmr14  | 5.6   | 4.9   | 4.5   | 5.2   | 6.3   | 3.7   | 5.9   | 5.2   | 5.9   | 5.6   | 5.0   | 5.1   |
| Mtmr2   | 34.9  | 29.5  | 28.7  | 34.3  | 27.5  | 34.6  | 32.3  | 27.4  | 28.0  | 26.5  | 33.3  | 30.6  |
| Mtmr3   | 15.0  | 17.8  | 16.1  | 14.7  | 15.0  | 16.4  | 14.4  | 15.1  | 16.8  | 14.6  | 14.4  | 14.6  |
| Mtmr4   | 9.0   | 9.1   | 8.7   | 8.0   | 8.3   | 8.8   | 8.8   | 8.9   | 9.9   | 9.0   | 8.8   | 8.2   |
| Mtmr6   | 28.2  | 29.6  | 28.0  | 31.5  | 29.0  | 29.1  | 27.7  | 24.5  | 30.0  | 28.9  | 31.5  | 32.8  |
| Mtmr7   | 0.7   | 0.8   | 0.9   | 0.9   | 0.8   | 1.0   | 0.7   | 0.7   | 0.6   | 0.9   | 1.1   | 1.1   |
| Mtmr9   | 18.4  | 15.5  | 15.4  | 19.9  | 14.4  | 17.1  | 14.7  | 16.0  | 14.4  | 14.5  | 15.3  | 14.8  |

Online Table 1

|         |       |       |       |       |       |       |       |       |       |       |       |       |
|---------|-------|-------|-------|-------|-------|-------|-------|-------|-------|-------|-------|-------|
| Mtnr1a  | 0.1   | 0.1   | 0.1   | 0.0   | 0.1   | 0.0   | 0.4   | 0.2   | 0.4   | 0.1   | 0.2   | 0.2   |
| Mto1    | 5.0   | 5.2   | 4.6   | 4.3   | 5.0   | 5.4   | 4.3   | 4.7   | 4.7   | 5.5   | 5.7   | 4.6   |
| Mtor    | 7.3   | 7.4   | 6.7   | 6.5   | 6.5   | 7.8   | 6.9   | 6.7   | 7.1   | 6.7   | 6.9   | 6.6   |
| Mtpap   | 7.0   | 6.7   | 7.7   | 7.0   | 6.8   | 8.5   | 7.0   | 6.8   | 6.7   | 6.6   | 7.5   | 7.6   |
| Mtpn    | 66.3  | 57.5  | 52.1  | 84.2  | 65.2  | 77.6  | 56.7  | 48.1  | 53.3  | 56.0  | 71.0  | 64.1  |
| Mtr     | 3.0   | 3.2   | 3.5   | 3.7   | 3.8   | 3.4   | 3.5   | 3.9   | 3.5   | 3.9   | 3.7   | 3.7   |
| Mtrf1   | 3.6   | 3.4   | 3.2   | 3.5   | 2.5   | 4.0   | 3.0   | 2.8   | 3.0   | 3.0   | 2.9   | 3.3   |
| Mtrf1l  | 2.4   | 3.0   | 3.5   | 2.2   | 2.4   | 2.2   | 2.5   | 3.8   | 2.9   | 3.3   | 2.6   | 3.3   |
| Mtrr    | 5.5   | 4.4   | 5.0   | 6.0   | 5.8   | 5.0   | 5.2   | 4.8   | 4.5   | 4.5   | 5.2   | 4.4   |
| Mtss1   | 4.7   | 5.3   | 4.6   | 8.1   | 6.7   | 5.1   | 5.5   | 3.3   | 8.1   | 14.9  | 10.2  | 10.1  |
| Mtss1l  | 2.4   | 2.9   | 2.8   | 3.6   | 2.8   | 4.2   | 2.8   | 2.5   | 2.5   | 1.8   | 2.5   | 2.3   |
| Mttp    | 2.3   | 2.2   | 2.6   | 1.3   | 1.4   | 1.7   | 1.6   | 2.2   | 1.5   | 1.3   | 1.6   | 1.8   |
| Mtus1   | 2.1   | 2.3   | 3.4   | 2.4   | 2.1   | 2.1   | 2.2   | 3.2   | 2.2   | 2.9   | 3.1   | 2.5   |
| Mtus2   | 0.8   | 0.5   | 0.6   | 0.7   | 0.4   | 0.8   | 0.5   | 0.5   | 0.4   | 0.4   | 0.4   | 0.6   |
| Mtx1    | 15.2  | 14.0  | 12.0  | 14.9  | 12.9  | 13.4  | 13.9  | 14.4  | 13.5  | 12.5  | 13.1  | 12.8  |
| Mtx2    | 39.5  | 36.3  | 31.5  | 31.5  | 30.1  | 33.0  | 28.9  | 29.9  | 31.0  | 36.6  | 32.2  | 34.9  |
| Mtx3    | 3.4   | 3.4   | 3.0   | 3.1   | 2.6   | 3.6   | 2.8   | 2.7   | 2.7   | 2.8   | 2.8   | 2.7   |
| Muc1    | 0.3   | 0.2   | 0.4   | 0.2   | 0.2   | 0.2   | 0.3   | 0.3   | 0.2   | 0.2   | 0.2   | 0.2   |
| Muc13   | 0.0   | 0.0   | 0.0   | 0.0   | 0.0   | 0.1   | 0.0   | 0.0   | 0.0   | 0.0   | 0.0   | 0.0   |
| Muc15   | 0.1   | 0.2   | 0.1   | 0.0   | 0.1   | 0.1   | 0.1   | 0.1   | 0.0   | 0.0   | 0.0   | 0.0   |
| Muc19   | 0.0   | 0.0   | 0.0   | 0.0   | 0.0   | 0.0   | 0.0   | 0.0   | 0.0   | 0.0   | 0.0   | 0.0   |
| Muc2    | 0.0   | 0.0   | 0.0   | 0.0   | 0.0   | 0.0   | 0.0   | 0.0   | 0.0   | 0.0   | 0.0   | 0.0   |
| Muc5b   | 0.0   | 0.0   | 0.0   | 0.0   | 0.0   | 0.0   | 0.0   | 0.0   | 0.0   | 0.0   | 0.0   | 0.0   |
| Muc6    | 0.0   | 0.0   | 0.0   | 0.0   | 0.0   | 0.0   | 0.1   | 0.1   | 0.1   | 0.0   | 0.0   | 0.0   |
| Muc11   | 0.0   | 0.0   | 0.0   | 0.1   | 0.0   | 0.0   | 0.0   | 0.0   | 0.0   | 0.0   | 0.0   | 0.0   |
| Mul1    | 4.4   | 4.5   | 3.7   | 4.9   | 4.0   | 4.3   | 4.1   | 3.8   | 4.2   | 4.7   | 4.1   | 3.3   |
| Mum1    | 5.8   | 6.1   | 5.6   | 4.8   | 5.8   | 6.0   | 6.6   | 5.4   | 6.7   | 5.8   | 5.3   | 5.0   |
| Mum1l1  | 11.1  | 8.7   | 5.6   | 12.0  | 5.9   | 9.9   | 6.3   | 3.6   | 5.2   | 6.3   | 8.0   | 5.9   |
| Murc    | 0.2   | 0.1   | 0.1   | 0.2   | 0.2   | 0.1   | 0.1   | 0.1   | 0.1   | 0.2   | 0.2   | 0.3   |
| Mus81   | 5.2   | 4.6   | 4.4   | 4.0   | 5.0   | 5.3   | 5.2   | 4.9   | 6.1   | 4.8   | 5.8   | 4.9   |
| Musk    | 0.2   | 0.3   | 0.6   | 0.1   | 0.2   | 0.1   | 0.2   | 0.3   | 0.1   | 0.3   | 0.0   | 0.1   |
| Mustn1  | 15.4  | 11.0  | 8.8   | 15.2  | 8.4   | 11.4  | 12.6  | 13.6  | 7.9   | 11.1  | 16.0  | 10.4  |
| Mut     | 18.2  | 15.3  | 15.1  | 15.9  | 12.2  | 16.9  | 13.8  | 12.9  | 13.0  | 13.7  | 15.8  | 14.4  |
| Mutyh   | 0.6   | 0.4   | 0.7   | 0.8   | 0.4   | 0.5   | 0.4   | 0.5   | 0.8   | 0.5   | 0.5   | 0.8   |
| Mvb12a  | 28.3  | 22.8  | 20.7  | 30.0  | 21.7  | 28.1  | 20.7  | 23.8  | 21.1  | 23.0  | 20.8  | 21.3  |
| Mvb12b  | 6.8   | 6.2   | 6.1   | 7.4   | 6.2   | 7.7   | 6.0   | 4.7   | 4.7   | 4.6   | 4.9   | 4.3   |
| Mvd     | 8.0   | 12.0  | 9.2   | 3.7   | 6.4   | 6.0   | 16.3  | 19.8  | 13.9  | 5.7   | 14.1  | 5.4   |
| Mvk     | 14.1  | 17.3  | 15.4  | 8.0   | 11.8  | 10.5  | 27.4  | 29.7  | 26.3  | 11.8  | 20.5  | 12.7  |
| Mvp     | 83.2  | 78.9  | 73.1  | 101.3 | 89.7  | 83.7  | 88.7  | 85.7  | 80.4  | 64.7  | 76.5  | 79.7  |
| Mx1     | 0.4   | 0.1   | 0.1   | 0.6   | 0.2   | 0.2   | 0.1   | 0.0   | 0.1   | 0.0   | 0.1   | 0.4   |
| Mx2     | 1.3   | 0.5   | 1.0   | 1.7   | 0.5   | 1.0   | 0.2   | 0.3   | 0.3   | 0.2   | 0.4   | 1.0   |
| Mxd1    | 1.3   | 2.2   | 2.2   | 1.5   | 1.5   | 1.5   | 1.7   | 1.7   | 2.0   | 1.8   | 1.7   | 1.6   |
| Mxd3    | 2.9   | 3.8   | 4.2   | 2.6   | 4.7   | 2.4   | 5.6   | 3.6   | 5.7   | 3.3   | 4.4   | 3.0   |
| Mxd4    | 49.3  | 49.6  | 50.0  | 46.0  | 46.6  | 44.6  | 55.2  | 72.1  | 61.7  | 56.2  | 53.9  | 50.7  |
| Mxi1    | 4.6   | 6.1   | 5.3   | 6.0   | 3.9   | 7.6   | 5.3   | 4.2   | 3.7   | 4.1   | 5.0   | 4.4   |
| Mxra7   | 64.4  | 59.3  | 67.3  | 80.4  | 52.7  | 84.7  | 65.8  | 58.6  | 50.1  | 59.0  | 62.9  | 71.5  |
| Mxra8   | 114.1 | 106.6 | 120.5 | 142.7 | 129.9 | 151.7 | 148.9 | 144.0 | 152.3 | 158.9 | 128.5 | 148.5 |
| Myadm   | 63.0  | 53.6  | 50.8  | 74.4  | 71.7  | 62.1  | 93.8  | 74.1  | 67.9  | 39.7  | 65.6  | 49.1  |
| Myb     | 0.0   | 0.0   | 0.1   | 0.0   | 0.0   | 0.0   | 0.1   | 0.0   | 0.0   | 0.0   | 0.0   | 0.0   |
| Mybbp1a | 23.4  | 20.1  | 17.8  | 26.6  | 21.7  | 24.2  | 22.3  | 19.7  | 17.1  | 22.5  | 21.3  | 20.0  |
| Mybl1   | 4.0   | 5.4   | 6.3   | 2.9   | 5.5   | 2.9   | 4.7   | 1.8   | 3.5   | 4.4   | 5.0   | 4.2   |
| Mybl2   | 0.4   | 0.8   | 1.2   | 0.2   | 1.0   | 0.2   | 1.4   | 0.7   | 0.9   | 0.7   | 1.0   | 0.4   |
| Mybpc2  | 0.0   | 0.0   | 0.0   | 0.2   | 0.0   | 0.0   | 0.0   | 0.0   | 0.0   | 0.0   | 0.0   | 0.0   |
| Mybpc3  | 0.1   | 0.0   | 0.0   | 0.1   | 0.0   | 0.0   | 0.0   | 0.0   | 0.0   | 0.0   | 0.0   | 0.0   |
| Mybph   | 0.0   | 0.0   | 0.0   | 0.0   | 0.0   | 0.0   | 0.0   | 0.0   | 0.0   | 0.0   | 0.0   | 0.0   |
| Myc     | 4.9   | 5.1   | 3.8   | 7.8   | 7.0   | 7.6   | 7.2   | 5.5   | 4.7   | 4.8   | 5.7   | 4.6   |
| Mycbp   | 8.7   | 10.2  | 9.0   | 11.5  | 10.1  | 10.2  | 9.4   | 8.9   | 10.3  | 10.8  | 12.7  | 11.3  |

Online Table 1

|         |       |       |       |        |       |       |        |        |        |       |        |        |
|---------|-------|-------|-------|--------|-------|-------|--------|--------|--------|-------|--------|--------|
| Mycbp2  | 19.1  | 29.5  | 29.0  | 20.1   | 24.4  | 15.6  | 23.7   | 21.6   | 20.4   | 15.9  | 18.1   | 18.2   |
| Mycbpap | 0.7   | 1.3   | 0.9   | 0.5    | 0.5   | 0.9   | 0.6    | 0.6    | 0.5    | 0.3   | 0.5    | 0.3    |
| Mycl1   | 0.2   | 0.0   | 0.0   | 0.3    | 0.2   | 0.1   | 0.1    | 0.2    | 0.2    | 0.5   | 0.5    | 0.1    |
| Mycn    | 3.6   | 5.4   | 4.9   | 1.3    | 3.2   | 2.0   | 4.4    | 4.0    | 2.7    | 6.3   | 5.4    | 2.4    |
| Myct1   | 0.6   | 0.1   | 0.3   | 0.1    | 0.1   | 0.2   | 0.3    | 0.4    | 0.2    | 0.1   | 0.1    | 0.1    |
| Myd88   | 9.4   | 9.6   | 11.6  | 10.2   | 12.7  | 7.6   | 9.7    | 11.3   | 9.7    | 12.6  | 8.9    | 11.3   |
| Myef2   | 9.3   | 11.0  | 13.5  | 9.9    | 10.2  | 9.4   | 14.2   | 11.0   | 11.4   | 11.8  | 13.9   | 14.1   |
| Myeov2  | 245.5 | 185.6 | 145.4 | 200.0  | 178.4 | 211.2 | 175.9  | 168.0  | 174.2  | 190.1 | 198.5  | 196.0  |
| Myg1    | 8.4   | 8.7   | 7.9   | 8.9    | 7.6   | 8.5   | 9.4    | 10.0   | 9.3    | 8.7   | 9.5    | 8.4    |
| Myh1    | 1.9   | 1.0   | 0.7   | 0.8    | 0.3   | 0.2   | 0.4    | 0.5    | 0.5    | 0.7   | 0.9    | 0.6    |
| Myh10   | 15.2  | 12.1  | 15.2  | 11.9   | 12.8  | 14.5  | 13.5   | 11.7   | 13.6   | 22.6  | 21.5   | 18.3   |
| Myh11   | 2.0   | 0.5   | 0.2   | 2.4    | 1.0   | 1.6   | 1.9    | 1.0    | 1.6    | 4.4   | 5.9    | 2.5    |
| Myh13   | 0.0   | 0.0   | 0.0   | 0.0    | 0.0   | 0.0   | 0.0    | 0.0    | 0.0    | 0.0   | 0.0    | 0.0    |
| Myh14   | 0.6   | 0.5   | 0.4   | 0.2    | 0.4   | 0.3   | 0.3    | 0.2    | 0.2    | 0.2   | 0.3    | 0.2    |
| Myh15   | 0.0   | 0.0   | 0.0   | 0.0    | 0.0   | 0.0   | 0.0    | 0.0    | 0.0    | 0.0   | 0.0    | 0.0    |
| Myh2    | 1.2   | 0.6   | 0.5   | 1.1    | 0.2   | 0.4   | 0.1    | 0.3    | 0.1    | 0.4   | 0.4    | 0.3    |
| Myh3    | 0.0   | 0.0   | 0.0   | 0.0    | 0.0   | 0.0   | 0.0    | 0.0    | 0.0    | 0.0   | 0.0    | 0.0    |
| Myh4    | 0.0   | 0.0   | 0.0   | 0.0    | 0.0   | 0.0   | 0.0    | 0.0    | 0.0    | 0.0   | 0.0    | 0.0    |
| Myh6    | 0.0   | 0.0   | 0.0   | 0.0    | 0.0   | 0.0   | 0.0    | 0.0    | 0.0    | 0.0   | 0.0    | 0.0    |
| Myh7b   | 0.0   | 0.0   | 0.0   | 0.0    | 0.0   | 0.0   | 0.0    | 0.0    | 0.0    | 0.0   | 0.0    | 0.0    |
| Myh8    | 0.1   | 0.1   | 0.1   | 0.1    | 0.0   | 0.0   | 0.0    | 0.0    | 0.0    | 0.1   | 0.1    | 0.1    |
| Myh9    | 212.9 | 179.8 | 196.2 | 214.5  | 250.8 | 195.2 | 278.3  | 233.7  | 236.7  | 251.6 | 277.7  | 285.9  |
| Myl1    | 0.0   | 0.0   | 0.1   | 0.0    | 0.0   | 0.0   | 0.0    | 0.0    | 0.1    | 0.1   | 0.0    | 0.2    |
| Myl10   | 0.2   | 0.0   | 0.1   | 0.0    | 0.1   | 0.2   | 0.3    | 0.1    | 0.3    | 0.2   | 0.1    | 0.3    |
| Myl12a  | 342.0 | 252.3 | 203.2 | 392.1  | 252.2 | 302.3 | 292.0  | 206.6  | 252.1  | 273.7 | 297.9  | 286.6  |
| Myl12b  | 207.7 | 166.1 | 186.3 | 262.7  | 156.3 | 236.2 | 162.6  | 170.4  | 140.5  | 142.5 | 164.4  | 171.9  |
| Myl2    | 0.2   | 0.2   | 0.1   | 0.0    | 0.1   | 0.3   | 0.0    | 0.1    | 0.1    | 0.0   | 0.5    | 0.1    |
| Myl3    | 0.0   | 0.0   | 0.0   | 0.0    | 0.0   | 0.0   | 0.1    | 0.0    | 0.0    | 0.0   | 0.0    | 0.0    |
| Myl4    | 10.9  | 11.9  | 8.2   | 8.9    | 6.4   | 4.4   | 13.5   | 14.9   | 16.3   | 6.1   | 10.1   | 8.5    |
| Myl6    | 998.0 | 795.3 | 815.5 | 1104.1 | 880.7 | 860.2 | 1041.0 | 1017.1 | 1033.6 | 940.7 | 1310.1 | 1087.9 |
| Myl6b   | 0.6   | 0.5   | 0.5   | 0.6    | 0.8   | 1.1   | 0.9    | 0.7    | 0.8    | 0.4   | 0.6    | 0.6    |
| Myl7    | 0.4   | 0.1   | 0.3   | 0.0    | 0.1   | 0.0   | 0.0    | 0.2    | 0.0    | 0.2   | 0.5    | 0.1    |
| Myl9    | 75.9  | 47.0  | 45.9  | 96.6   | 96.8  | 50.7  | 173.7  | 72.3   | 147.7  | 140.8 | 241.3  | 156.5  |
| Mylip   | 6.9   | 8.5   | 10.3  | 9.3    | 10.6  | 5.9   | 7.4    | 7.6    | 8.4    | 8.2   | 7.1    | 8.6    |
| Mylk    | 0.8   | 0.6   | 1.3   | 0.7    | 1.3   | 0.6   | 1.3    | 1.4    | 2.2    | 3.9   | 3.3    | 3.4    |
| Mylk2   | 0.3   | 0.2   | 0.2   | 0.0    | 0.1   | 0.2   | 0.2    | 0.2    | 0.1    | 0.3   | 0.2    | 0.2    |
| Mylk3   | 0.7   | 0.4   | 0.3   | 0.3    | 0.6   | 0.3   | 0.3    | 0.1    | 0.4    | 1.6   | 0.7    | 0.6    |
| Mylpf   | 1.3   | 1.0   | 1.1   | 0.8    | 1.1   | 1.3   | 0.8    | 0.7    | 0.9    | 0.6   | 0.6    | 1.2    |
| Mynn    | 4.7   | 4.8   | 4.7   | 4.1    | 4.6   | 5.2   | 3.8    | 4.5    | 4.3    | 4.7   | 4.7    | 5.5    |
| Myo10   | 21.9  | 33.5  | 38.6  | 26.4   | 29.1  | 24.5  | 29.5   | 23.0   | 25.6   | 24.6  | 23.1   | 34.8   |
| Myo15   | 0.0   | 0.0   | 0.0   | 0.1    | 0.0   | 0.0   | 0.0    | 0.0    | 0.0    | 0.0   | 0.0    | 0.0    |
| Myo16   | 0.0   | 0.0   | 0.0   | 0.1    | 0.0   | 0.0   | 0.0    | 0.0    | 0.0    | 0.0   | 0.0    | 0.0    |
| Myo18a  | 8.1   | 5.8   | 6.0   | 8.1    | 7.4   | 7.0   | 7.0    | 5.5    | 5.9    | 7.5   | 8.4    | 7.8    |
| Myo18b  | 0.1   | 0.2   | 0.1   | 0.1    | 0.1   | 0.2   | 0.1    | 0.1    | 0.0    | 0.0   | 0.0    | 0.0    |
| Myo19   | 2.1   | 2.5   | 2.6   | 2.2    | 2.6   | 1.9   | 3.3    | 3.0    | 2.9    | 2.0   | 3.2    | 2.1    |
| Myo1a   | 0.1   | 0.0   | 0.1   | 0.0    | 0.1   | 0.1   | 0.1    | 0.1    | 0.1    | 0.0   | 0.1    | 0.1    |
| Myo1b   | 13.7  | 19.8  | 16.8  | 15.7   | 21.5  | 18.3  | 21.4   | 14.9   | 20.4   | 17.6  | 21.1   | 16.2   |
| Myo1c   | 134.2 | 111.3 | 86.0  | 135.7  | 95.0  | 120.8 | 120.5  | 112.6  | 108.6  | 113.0 | 129.2  | 105.9  |
| Myo1d   | 11.5  | 11.5  | 11.4  | 9.5    | 11.1  | 9.8   | 13.0   | 10.4   | 12.1   | 12.2  | 12.2   | 13.4   |
| Myo1e   | 5.6   | 3.5   | 3.9   | 8.3    | 11.7  | 5.0   | 7.4    | 5.0    | 5.0    | 5.9   | 6.9    | 5.9    |
| Myo1f   | 1.4   | 0.0   | 0.0   | 15.1   | 21.3  | 0.0   | 2.0    | 0.2    | 0.3    | 1.4   | 0.3    | 0.9    |
| Myo1g   | 0.3   | 0.0   | 0.0   | 2.4    | 6.0   | 0.0   | 0.7    | 0.1    | 0.2    | 0.5   | 0.2    | 0.2    |
| Myo1h   | 0.5   | 0.4   | 0.5   | 0.6    | 0.4   | 0.3   | 0.5    | 0.6    | 0.2    | 0.4   | 0.4    | 0.6    |
| Myo3b   | 0.0   | 0.0   | 0.0   | 0.0    | 0.0   | 0.0   | 0.0    | 0.0    | 0.0    | 0.0   | 0.0    | 0.0    |
| Myo5a   | 15.4  | 11.4  | 9.4   | 17.7   | 15.3  | 16.1  | 10.2   | 8.6    | 7.3    | 9.8   | 11.7   | 10.6   |
| Myo5b   | 0.1   | 0.1   | 0.0   | 0.1    | 0.0   | 0.0   | 0.1    | 0.1    | 0.4    | 2.4   | 0.6    | 0.5    |
| Myo5c   | 0.0   | 0.0   | 0.0   | 0.0    | 0.0   | 0.0   | 0.0    | 0.0    | 0.0    | 0.0   | 0.0    | 0.0    |

Online Table 1

|          |       |       |       |       |       |       |       |       |       |       |       |       |
|----------|-------|-------|-------|-------|-------|-------|-------|-------|-------|-------|-------|-------|
| Myo6     | 10.2  | 8.7   | 7.6   | 11.5  | 7.8   | 11.9  | 7.3   | 6.2   | 6.4   | 7.3   | 8.2   | 8.7   |
| Myo7a    | 10.3  | 12.9  | 14.9  | 10.6  | 14.4  | 8.4   | 12.2  | 13.2  | 13.7  | 8.7   | 7.9   | 11.7  |
| Myo9a    | 4.5   | 4.9   | 5.0   | 3.8   | 4.2   | 3.9   | 4.9   | 6.0   | 5.0   | 4.3   | 5.7   | 5.2   |
| Myo9b    | 16.2  | 17.5  | 17.0  | 17.3  | 19.0  | 16.3  | 20.1  | 17.0  | 18.8  | 16.8  | 17.4  | 18.0  |
| Myoc     | 0.0   | 0.1   | 0.6   | 0.1   | 0.0   | 0.0   | 0.0   | 0.1   | 0.0   | 0.0   | 0.0   | 0.0   |
| Myocd    | 0.0   | 0.0   | 0.1   | 0.0   | 0.0   | 0.0   | 0.1   | 0.0   | 0.0   | 0.1   | 0.0   | 0.0   |
| Myof     | 35.8  | 35.4  | 39.8  | 37.5  | 44.5  | 31.9  | 47.2  | 40.5  | 43.6  | 42.4  | 45.3  | 49.2  |
| Myom1    | 0.7   | 0.4   | 0.4   | 0.3   | 0.4   | 0.5   | 0.4   | 0.3   | 0.6   | 0.4   | 0.7   | 0.5   |
| Myom2    | 0.6   | 0.1   | 0.1   | 0.4   | 0.1   | 0.1   | 0.0   | 0.1   | 0.0   | 0.0   | 0.0   | 0.0   |
| Myom3    | 0.0   | 0.0   | 0.0   | 0.0   | 0.0   | 0.0   | 0.0   | 0.0   | 0.0   | 0.0   | 0.0   | 0.0   |
| Myot     | 0.0   | 0.1   | 0.0   | 0.0   | 0.1   | 0.0   | 0.0   | 0.0   | 0.0   | 0.0   | 0.0   | 0.0   |
| Myoz1    | 0.1   | 0.1   | 0.1   | 0.2   | 0.3   | 0.0   | 0.1   | 0.1   | 0.1   | 0.2   | 0.0   | 0.0   |
| Myoz2    | 0.3   | 0.0   | 0.0   | 0.0   | 0.0   | 0.0   | 0.0   | 0.0   | 0.0   | 0.2   | 0.2   | 0.2   |
| Myoz3    | 0.1   | 0.0   | 0.1   | 0.1   | 0.1   | 0.1   | 0.1   | 0.1   | 0.1   | 0.0   | 0.0   | 0.1   |
| Mypn     | 0.0   | 0.0   | 0.0   | 0.0   | 0.0   | 0.0   | 0.0   | 0.0   | 0.0   | 0.0   | 0.0   | 0.0   |
| Mypop    | 1.4   | 2.0   | 1.8   | 1.5   | 1.6   | 1.6   | 1.8   | 2.7   | 1.8   | 1.6   | 1.6   | 1.6   |
| Myrf     | 6.9   | 7.8   | 6.9   | 5.7   | 5.6   | 4.8   | 8.8   | 8.0   | 6.8   | 8.6   | 7.9   | 5.8   |
| Myrfl    | 0.1   | 0.0   | 0.1   | 0.1   | 0.1   | 0.1   | 0.1   | 0.1   | 0.1   | 0.1   | 0.1   | 0.0   |
| Myrip    | 0.0   | 0.0   | 0.0   | 0.0   | 0.0   | 0.0   | 0.0   | 0.0   | 0.0   | 0.0   | 0.0   | 0.0   |
| Mysm1    | 3.9   | 4.2   | 4.1   | 4.1   | 4.0   | 4.2   | 3.3   | 3.5   | 3.4   | 3.5   | 4.5   | 4.3   |
| Myt1     | 0.0   | 0.0   | 0.0   | 0.0   | 0.0   | 0.0   | 0.0   | 0.0   | 0.0   | 0.0   | 0.0   | 0.0   |
| Myt1l    | 0.0   | 0.0   | 0.0   | 0.0   | 0.0   | 0.0   | 0.0   | 0.0   | 0.0   | 0.0   | 0.0   | 0.0   |
| Myzap    | 0.9   | 0.9   | 1.0   | 0.4   | 0.6   | 0.9   | 0.7   | 0.8   | 0.6   | 0.4   | 0.3   | 0.5   |
| Mzf1     | 0.3   | 0.2   | 0.3   | 0.2   | 0.3   | 0.4   | 0.2   | 0.4   | 0.2   | 0.2   | 0.1   | 0.1   |
| Mzt1     | 12.7  | 11.9  | 14.8  | 15.7  | 12.9  | 14.9  | 14.8  | 12.8  | 14.2  | 13.9  | 17.6  | 17.3  |
| Mzt2     | 7.3   | 7.3   | 6.4   | 8.3   | 6.5   | 8.3   | 5.2   | 9.2   | 8.4   | 8.3   | 8.6   | 5.7   |
| N28178   | 0.1   | 0.2   | 0.3   | 0.2   | 0.1   | 0.1   | 0.2   | 0.2   | 0.1   | 0.1   | 0.1   | 0.0   |
| N4bp1    | 7.8   | 9.0   | 8.5   | 7.2   | 7.7   | 8.2   | 7.8   | 7.1   | 7.5   | 8.2   | 8.0   | 8.1   |
| N4bp2    | 1.3   | 1.6   | 1.8   | 1.4   | 1.6   | 1.1   | 1.3   | 2.3   | 1.7   | 1.7   | 1.6   | 1.8   |
| N4bp2l1  | 2.0   | 2.0   | 2.3   | 1.6   | 1.6   | 1.6   | 1.6   | 1.6   | 1.4   | 1.8   | 1.7   | 2.3   |
| N4bp2l2  | 8.0   | 7.3   | 6.8   | 7.2   | 7.0   | 7.1   | 6.5   | 6.3   | 6.4   | 7.8   | 7.8   | 7.5   |
| N4bp3    | 0.6   | 0.3   | 0.7   | 0.3   | 0.6   | 0.3   | 0.9   | 1.0   | 0.8   | 0.5   | 0.4   | 0.3   |
| N6am1    | 4.9   | 4.2   | 3.5   | 4.9   | 3.9   | 3.8   | 5.2   | 4.3   | 4.2   | 4.5   | 4.5   | 4.9   |
| N6am2    | 18.6  | 17.6  | 16.5  | 18.3  | 16.2  | 17.7  | 17.0  | 20.2  | 16.9  | 17.3  | 18.4  | 13.1  |
| Naa10    | 9.0   | 8.8   | 8.8   | 8.2   | 8.2   | 7.1   | 9.0   | 10.2  | 10.4  | 11.6  | 9.9   | 7.9   |
| Naa15    | 5.4   | 6.8   | 6.1   | 6.6   | 7.6   | 5.7   | 6.8   | 6.9   | 5.7   | 7.3   | 7.3   | 7.2   |
| Naa16    | 1.2   | 2.0   | 2.1   | 1.4   | 1.7   | 1.3   | 1.7   | 1.5   | 1.4   | 1.8   | 1.9   | 1.5   |
| Naa20    | 26.3  | 25.4  | 23.9  | 26.2  | 23.7  | 24.3  | 26.7  | 24.1  | 24.6  | 29.3  | 28.5  | 30.0  |
| Naa25    | 11.6  | 11.0  | 9.1   | 12.4  | 10.6  | 10.3  | 11.8  | 11.3  | 10.5  | 11.0  | 12.2  | 10.3  |
| Naa30    | 3.3   | 4.1   | 4.7   | 3.7   | 4.1   | 4.5   | 3.4   | 4.3   | 4.1   | 4.9   | 4.8   | 4.9   |
| Naa35    | 8.3   | 7.6   | 7.6   | 7.1   | 6.1   | 6.2   | 6.5   | 6.3   | 6.8   | 8.2   | 8.0   | 8.1   |
| Naa38    | 16.6  | 16.7  | 16.9  | 16.8  | 16.3  | 15.9  | 17.7  | 14.5  | 18.2  | 18.7  | 18.7  | 16.3  |
| Naa40    | 5.0   | 5.9   | 5.5   | 4.2   | 5.4   | 4.3   | 4.4   | 3.9   | 4.7   | 4.9   | 4.5   | 3.9   |
| Naa50    | 8.6   | 9.3   | 11.1  | 13.3  | 12.4  | 12.5  | 10.7  | 11.3  | 9.8   | 11.2  | 13.6  | 11.3  |
| Naa60    | 14.0  | 15.4  | 18.2  | 16.7  | 17.0  | 15.9  | 15.8  | 17.5  | 14.7  | 12.3  | 15.0  | 15.3  |
| Naaa     | 6.1   | 4.6   | 4.6   | 4.8   | 4.4   | 6.6   | 4.2   | 5.9   | 3.9   | 4.3   | 5.6   | 4.0   |
| Naalad2  | 31.5  | 33.5  | 37.4  | 30.7  | 34.4  | 41.0  | 32.1  | 35.5  | 34.9  | 25.3  | 28.7  | 32.8  |
| Naaladl1 | 0.0   | 0.0   | 0.0   | 0.0   | 0.1   | 0.1   | 0.1   | 0.0   | 0.0   | 0.0   | 0.0   | 0.0   |
| Nab1     | 20.8  | 21.4  | 23.3  | 24.9  | 21.7  | 20.8  | 22.6  | 20.7  | 18.9  | 18.7  | 24.4  | 23.3  |
| Nab2     | 9.8   | 12.3  | 11.2  | 8.0   | 10.0  | 8.9   | 11.9  | 13.9  | 15.5  | 17.8  | 13.4  | 11.4  |
| Nabp1    | 5.0   | 4.2   | 5.5   | 4.9   | 7.1   | 4.7   | 4.5   | 3.8   | 4.6   | 4.8   | 5.4   | 7.0   |
| Nabp2    | 16.5  | 13.3  | 14.8  | 18.9  | 11.6  | 17.8  | 14.0  | 14.5  | 11.9  | 10.8  | 15.6  | 13.1  |
| Naca     | 291.5 | 236.7 | 232.2 | 251.7 | 224.0 | 256.0 | 233.8 | 254.9 | 245.4 | 287.0 | 311.0 | 286.2 |
| Nacad    | 1.0   | 1.6   | 1.4   | 1.6   | 1.1   | 1.6   | 2.1   | 1.5   | 1.7   | 1.1   | 1.6   | 1.2   |
| Nacc1    | 10.9  | 11.6  | 11.5  | 11.9  | 11.4  | 13.0  | 13.1  | 11.5  | 11.3  | 10.5  | 11.9  | 10.1  |
| Nacc2    | 15.8  | 14.4  | 11.0  | 18.6  | 14.8  | 17.1  | 16.9  | 12.2  | 14.7  | 18.5  | 16.6  | 15.3  |
| Nadk     | 59.4  | 49.3  | 46.6  | 56.5  | 61.1  | 45.1  | 64.6  | 53.2  | 48.9  | 45.6  | 55.9  | 46.9  |

Online Table 1



|         |       |       |       |       |       |       |       |       |       |       |       |       |
|---------|-------|-------|-------|-------|-------|-------|-------|-------|-------|-------|-------|-------|
| Nadkd1  | 3.8   | 4.6   | 5.1   | 4.3   | 3.9   | 6.6   | 3.8   | 5.2   | 4.4   | 4.4   | 4.6   | 4.6   |
| Nadsyn1 | 1.7   | 1.4   | 1.4   | 1.6   | 1.2   | 1.9   | 1.4   | 1.3   | 1.3   | 1.3   | 1.0   | 1.6   |
| Nae1    | 26.2  | 28.4  | 22.6  | 25.6  | 23.4  | 28.0  | 24.2  | 21.1  | 28.1  | 24.8  | 28.6  | 27.7  |
| Naf1    | 1.8   | 2.4   | 2.0   | 1.4   | 1.5   | 1.5   | 1.9   | 1.5   | 1.6   | 2.2   | 1.4   | 1.5   |
| Naga    | 16.4  | 13.9  | 16.6  | 19.2  | 16.0  | 25.0  | 12.1  | 16.7  | 13.6  | 13.6  | 11.8  | 14.8  |
| Nagk    | 31.9  | 24.0  | 23.9  | 37.8  | 29.4  | 32.2  | 28.7  | 26.2  | 30.8  | 28.5  | 32.1  | 28.8  |
| Naglu   | 15.4  | 12.5  | 11.8  | 20.5  | 13.7  | 22.0  | 9.9   | 10.8  | 12.3  | 13.9  | 9.8   | 12.3  |
| Nagpa   | 8.0   | 6.3   | 5.9   | 10.5  | 10.4  | 10.3  | 7.0   | 7.1   | 6.5   | 8.1   | 6.0   | 7.5   |
| Naif1   | 1.6   | 1.4   | 1.1   | 1.3   | 1.4   | 1.2   | 1.6   | 1.5   | 1.3   | 1.3   | 1.3   | 1.4   |
| Naip1   | 0.1   | 0.0   | 0.0   | 0.2   | 0.2   | 0.0   | 0.1   | 0.0   | 0.0   | 0.0   | 0.0   | 0.0   |
| Naip2   | 1.8   | 0.8   | 0.5   | 3.2   | 4.9   | 0.8   | 1.1   | 0.5   | 0.4   | 0.5   | 0.5   | 0.6   |
| Naip5   | 0.1   | 0.1   | 0.0   | 0.4   | 0.8   | 0.0   | 0.1   | 0.0   | 0.0   | 0.1   | 0.1   | 0.0   |
| Naip6   | 0.0   | 0.0   | 0.0   | 0.2   | 0.4   | 0.0   | 0.0   | 0.0   | 0.0   | 0.0   | 0.1   | 0.1   |
| Naip7   | 0.1   | 0.1   | 0.0   | 0.3   | 0.1   | 0.1   | 0.1   | 0.1   | 0.0   | 0.0   | 0.0   | 0.0   |
| Nalcn   | 0.2   | 0.1   | 0.3   | 0.2   | 0.1   | 0.2   | 0.1   | 0.2   | 0.1   | 0.1   | 0.1   | 0.1   |
| Nampt   | 10.6  | 9.8   | 9.5   | 12.1  | 8.6   | 11.5  | 6.4   | 7.7   | 6.2   | 6.5   | 8.1   | 7.9   |
| Nanog   | 0.0   | 0.1   | 0.0   | 0.0   | 0.0   | 0.0   | 0.1   | 0.0   | 0.0   | 0.1   | 0.1   | 0.1   |
| Nanos1  | 1.5   | 2.3   | 2.1   | 1.5   | 3.4   | 1.6   | 2.5   | 1.5   | 1.9   | 2.3   | 2.4   | 1.9   |
| Nanp    | 7.0   | 7.4   | 7.7   | 7.0   | 6.5   | 6.7   | 5.7   | 8.1   | 6.5   | 7.9   | 7.0   | 6.9   |
| Nans    | 25.3  | 21.9  | 20.3  | 25.4  | 26.1  | 23.8  | 25.3  | 19.2  | 19.8  | 19.8  | 24.1  | 21.1  |
| Nap111  | 180.5 | 154.6 | 155.0 | 204.5 | 171.6 | 177.1 | 200.1 | 146.0 | 136.2 | 168.0 | 198.0 | 199.9 |
| Nap112  | 0.4   | 0.2   | 0.3   | 0.6   | 1.1   | 0.8   | 0.7   | 0.2   | 0.2   | 0.3   | 0.3   | 0.4   |
| Nap113  | 2.0   | 1.7   | 1.8   | 1.4   | 1.0   | 2.0   | 1.4   | 1.4   | 1.3   | 1.8   | 1.6   | 1.6   |
| Nap114  | 36.9  | 35.5  | 34.4  | 37.9  | 32.4  | 34.4  | 33.3  | 32.0  | 32.7  | 37.8  | 36.2  | 36.4  |
| Nap115  | 0.1   | 0.3   | 0.3   | 0.2   | 0.3   | 0.2   | 0.2   | 0.2   | 0.2   | 0.1   | 0.2   | 0.0   |
| Napa    | 58.7  | 47.1  | 37.5  | 65.7  | 52.7  | 64.4  | 48.5  | 43.8  | 41.9  | 46.2  | 49.5  | 44.0  |
| Napb    | 1.3   | 1.1   | 0.8   | 1.7   | 1.0   | 1.5   | 1.0   | 0.9   | 0.8   | 0.8   | 1.1   | 0.9   |
| Napepld | 2.0   | 2.4   | 3.0   | 1.8   | 1.8   | 1.9   | 2.3   | 2.6   | 2.0   | 1.8   | 2.1   | 2.3   |
| Napg    | 7.9   | 8.4   | 8.5   | 10.0  | 10.8  | 9.4   | 8.3   | 7.7   | 9.2   | 7.7   | 9.4   | 9.3   |
| Naprt1  | 2.7   | 3.9   | 4.2   | 2.0   | 2.9   | 2.8   | 3.8   | 5.2   | 5.3   | 3.5   | 3.6   | 4.0   |
| Napsa   | 0.0   | 0.0   | 0.0   | 0.4   | 0.8   | 0.0   | 0.1   | 0.1   | 0.0   | 0.1   | 0.0   | 0.0   |
| Narf    | 6.7   | 6.8   | 6.1   | 6.4   | 5.4   | 7.1   | 5.4   | 6.2   | 6.6   | 6.5   | 6.0   | 6.8   |
| Narfl   | 5.5   | 5.6   | 3.9   | 5.7   | 5.5   | 5.3   | 4.1   | 4.1   | 4.9   | 6.3   | 4.6   | 4.8   |
| Narg2   | 3.7   | 3.3   | 3.7   | 3.4   | 3.6   | 4.2   | 3.2   | 3.0   | 3.4   | 3.7   | 4.0   | 3.7   |
| Nars    | 164.7 | 107.6 | 89.7  | 203.8 | 112.1 | 161.5 | 118.6 | 116.0 | 101.5 | 104.4 | 135.6 | 112.1 |
| Nars2   | 2.2   | 1.7   | 1.5   | 1.7   | 1.6   | 1.7   | 1.4   | 1.1   | 1.1   | 1.6   | 1.4   | 1.5   |
| Nasp    | 8.1   | 8.2   | 12.3  | 7.6   | 10.5  | 5.8   | 11.5  | 11.1  | 9.7   | 8.6   | 11.4  | 9.6   |
| Nat1    | 0.0   | 0.0   | 0.0   | 0.0   | 0.0   | 0.0   | 0.0   | 0.0   | 0.0   | 0.1   | 0.0   | 0.0   |
| Nat10   | 6.3   | 4.3   | 5.0   | 6.8   | 5.1   | 5.6   | 5.7   | 5.4   | 4.5   | 4.9   | 5.2   | 4.7   |
| Nat14   | 2.4   | 2.4   | 2.2   | 1.9   | 1.7   | 2.9   | 1.6   | 1.5   | 1.2   | 2.2   | 1.3   | 2.0   |
| Nat2    | 5.0   | 5.0   | 5.9   | 3.7   | 5.1   | 4.4   | 4.8   | 5.3   | 6.4   | 5.8   | 6.1   | 7.2   |
| Nat3    | 0.0   | 0.0   | 0.0   | 0.1   | 0.0   | 0.0   | 0.0   | 0.0   | 0.0   | 0.0   | 0.0   | 0.0   |
| Nat6    | 10.6  | 9.7   | 9.2   | 11.9  | 9.6   | 12.4  | 8.8   | 8.5   | 7.8   | 8.0   | 8.3   | 8.8   |
| Nat8l   | 0.2   | 0.1   | 0.1   | 0.1   | 0.1   | 0.0   | 0.4   | 0.4   | 0.4   | 0.6   | 0.6   | 0.3   |
| Nat9    | 24.1  | 20.0  | 16.2  | 24.4  | 15.6  | 25.3  | 14.4  | 13.1  | 11.6  | 15.1  | 17.1  | 15.8  |
| Nav1    | 4.3   | 8.4   | 8.7   | 4.3   | 6.1   | 4.6   | 8.8   | 9.4   | 7.9   | 5.2   | 7.3   | 6.7   |
| Nav2    | 0.4   | 0.4   | 0.4   | 0.6   | 0.8   | 0.4   | 0.5   | 0.2   | 0.3   | 0.4   | 0.4   | 0.3   |
| Nav3    | 0.8   | 0.8   | 0.8   | 0.8   | 1.1   | 0.5   | 1.4   | 0.7   | 0.7   | 0.8   | 0.8   | 0.6   |
| Nbas    | 14.9  | 13.9  | 13.0  | 12.7  | 12.4  | 13.4  | 11.0  | 15.0  | 12.7  | 12.1  | 13.0  | 12.6  |
| Nbea    | 7.7   | 8.0   | 7.5   | 6.2   | 8.3   | 6.2   | 8.4   | 7.8   | 8.6   | 7.9   | 8.2   | 8.3   |
| Nbeal1  | 8.9   | 9.1   | 7.9   | 9.9   | 8.6   | 10.3  | 8.2   | 7.2   | 7.9   | 9.2   | 10.4  | 9.2   |
| Nbeal2  | 0.4   | 0.2   | 0.2   | 1.6   | 2.9   | 0.4   | 0.6   | 0.2   | 0.4   | 0.5   | 0.3   | 0.4   |
| Nbl1    | 19.5  | 14.5  | 11.8  | 22.9  | 17.3  | 32.7  | 25.6  | 18.9  | 22.4  | 37.9  | 30.8  | 25.6  |
| Nbn     | 7.7   | 7.6   | 8.3   | 7.7   | 8.9   | 6.6   | 9.0   | 8.3   | 8.9   | 8.7   | 10.1  | 9.7   |
| Nbr1    | 44.1  | 43.2  | 44.2  | 42.5  | 42.6  | 45.8  | 37.2  | 40.2  | 36.7  | 46.4  | 43.4  | 49.1  |
| Ncald   | 1.6   | 1.0   | 0.8   | 2.7   | 1.2   | 1.5   | 0.8   | 0.4   | 0.5   | 0.7   | 0.8   | 0.5   |
| Ncam1   | 7.1   | 4.6   | 6.1   | 5.3   | 10.3  | 6.2   | 17.2  | 7.8   | 19.6  | 21.1  | 17.6  | 22.3  |

Online Table 1

|            |       |       |      |       |       |       |       |      |       |       |       |       |
|------------|-------|-------|------|-------|-------|-------|-------|------|-------|-------|-------|-------|
| Ncam2      | 0.0   | 0.1   | 0.0  | 0.0   | 0.0   | 0.0   | 0.0   | 0.0  | 0.0   | 0.0   | 0.0   | 0.1   |
| Ncapd2     | 2.0   | 4.4   | 7.1  | 1.8   | 5.4   | 1.9   | 7.1   | 4.4  | 5.7   | 2.9   | 4.4   | 3.8   |
| Ncapd3     | 3.2   | 3.8   | 5.3  | 2.7   | 3.8   | 2.6   | 4.5   | 3.6  | 3.3   | 2.9   | 4.3   | 2.9   |
| Ncapg      | 1.4   | 3.6   | 5.4  | 0.7   | 5.0   | 0.6   | 4.3   | 1.9  | 4.1   | 2.4   | 3.9   | 2.5   |
| Ncapg2     | 1.4   | 2.5   | 4.1  | 1.4   | 3.8   | 0.7   | 4.4   | 2.2  | 3.0   | 1.8   | 2.8   | 1.8   |
| Ncaph      | 2.7   | 4.4   | 7.6  | 1.1   | 6.2   | 1.2   | 6.7   | 4.0  | 6.1   | 3.2   | 4.9   | 3.4   |
| Ncaph2     | 18.3  | 20.6  | 20.1 | 18.6  | 18.0  | 20.7  | 19.9  | 19.1 | 20.2  | 18.5  | 18.4  | 17.6  |
| Ncbp1      | 17.0  | 15.3  | 15.4 | 17.8  | 15.0  | 15.8  | 16.3  | 16.1 | 13.0  | 14.3  | 16.4  | 15.7  |
| Ncbp2      | 30.5  | 30.2  | 26.8 | 33.1  | 33.2  | 29.5  | 31.1  | 29.2 | 30.1  | 34.5  | 34.3  | 34.2  |
| Ncdn       | 5.9   | 5.9   | 4.6  | 7.1   | 6.3   | 5.8   | 6.9   | 6.3  | 6.6   | 6.1   | 5.3   | 5.5   |
| Nceh1      | 6.3   | 4.2   | 3.3  | 12.9  | 10.1  | 8.2   | 4.3   | 3.1  | 2.9   | 6.4   | 5.8   | 4.2   |
| Ncf1       | 1.6   | 0.1   | 0.1  | 14.0  | 24.5  | 0.0   | 2.5   | 0.4  | 0.5   | 1.6   | 0.3   | 1.1   |
| Ncf2       | 2.5   | 0.4   | 0.4  | 12.9  | 25.0  | 0.5   | 2.8   | 0.6  | 0.5   | 1.9   | 0.6   | 1.7   |
| Ncf4       | 0.8   | 0.0   | 0.1  | 8.0   | 13.6  | 0.0   | 1.4   | 0.1  | 0.4   | 0.6   | 0.1   | 0.6   |
| Nck1       | 24.8  | 28.0  | 28.2 | 24.7  | 28.7  | 20.9  | 24.1  | 25.2 | 24.0  | 23.6  | 27.3  | 28.6  |
| Nck2       | 11.2  | 11.0  | 11.1 | 10.7  | 10.2  | 11.2  | 11.1  | 10.1 | 12.0  | 11.1  | 12.2  | 10.7  |
| Nckap1     | 96.1  | 92.6  | 77.0 | 92.7  | 77.6  | 97.5  | 79.7  | 76.1 | 76.4  | 81.1  | 91.0  | 82.9  |
| Nckap1l    | 1.7   | 0.1   | 0.1  | 13.2  | 25.3  | 0.1   | 2.9   | 0.5  | 0.5   | 1.6   | 0.5   | 1.0   |
| Nckap5     | 0.3   | 0.2   | 0.4  | 0.2   | 0.1   | 0.1   | 0.1   | 0.5  | 0.1   | 0.3   | 0.3   | 0.3   |
| Nckap5l    | 1.1   | 1.6   | 1.3  | 0.9   | 1.3   | 1.0   | 1.3   | 1.7  | 1.9   | 1.2   | 1.0   | 1.0   |
| Nckipsd    | 1.9   | 2.1   | 2.3  | 2.0   | 2.0   | 2.2   | 2.3   | 2.7  | 2.8   | 2.0   | 2.2   | 2.5   |
| Ncl        | 43.2  | 31.1  | 34.0 | 52.3  | 35.3  | 39.7  | 37.6  | 30.7 | 19.1  | 27.8  | 34.6  | 35.7  |
| Ncln       | 16.3  | 14.5  | 11.5 | 18.2  | 18.5  | 13.8  | 20.1  | 16.7 | 19.3  | 17.6  | 16.3  | 12.7  |
| Ncmap      | 0.1   | 0.0   | 0.0  | 0.0   | 0.0   | 0.1   | 0.0   | 0.1  | 0.0   | 0.0   | 0.1   | 0.0   |
| Ncoa1      | 2.8   | 3.4   | 4.3  | 3.3   | 2.9   | 3.3   | 3.1   | 4.0  | 3.0   | 2.5   | 2.6   | 2.9   |
| Ncoa2      | 6.4   | 7.9   | 8.1  | 6.7   | 6.3   | 7.2   | 6.8   | 7.2  | 6.5   | 4.9   | 6.7   | 6.3   |
| Ncoa3      | 5.5   | 8.3   | 8.8  | 6.2   | 7.7   | 5.4   | 6.7   | 6.9  | 7.1   | 4.7   | 5.4   | 6.2   |
| Ncoa4      | 52.9  | 48.1  | 40.1 | 52.7  | 46.2  | 47.2  | 38.8  | 37.6 | 40.1  | 52.8  | 51.0  | 48.4  |
| Ncoa5      | 6.8   | 7.3   | 7.6  | 7.3   | 7.2   | 7.5   | 7.4   | 8.5  | 8.0   | 8.3   | 7.8   | 7.4   |
| Ncoa6      | 1.6   | 2.4   | 2.5  | 1.9   | 2.3   | 1.7   | 2.7   | 2.7  | 2.4   | 1.9   | 2.1   | 1.9   |
| Ncoa7      | 2.2   | 3.0   | 3.2  | 2.8   | 3.2   | 1.9   | 3.1   | 2.6  | 2.5   | 1.9   | 2.3   | 3.1   |
| Ncor1      | 18.3  | 19.8  | 23.4 | 21.7  | 19.0  | 21.9  | 20.0  | 22.1 | 17.7  | 19.0  | 22.6  | 21.7  |
| Ncor2      | 1.3   | 2.1   | 2.0  | 1.6   | 2.3   | 1.7   | 2.9   | 2.6  | 2.5   | 2.2   | 2.1   | 1.9   |
| Ncrna00085 | 0.9   | 0.6   | 0.7  | 0.3   | 0.6   | 0.5   | 0.7   | 0.9  | 0.5   | 0.4   | 0.5   | 1.2   |
| Ncrna00086 | 0.4   | 0.3   | 0.2  | 0.3   | 0.4   | 0.5   | 0.4   | 0.2  | 0.3   | 0.2   | 0.2   | 0.1   |
| Ncs1       | 15.3  | 14.8  | 12.1 | 13.8  | 14.3  | 16.3  | 17.5  | 13.3 | 17.3  | 12.8  | 15.0  | 13.2  |
| Ncstn      | 40.7  | 37.6  | 37.9 | 41.4  | 43.3  | 41.0  | 37.7  | 40.3 | 37.4  | 33.2  | 31.1  | 32.8  |
| Ndc80      | 2.1   | 4.8   | 6.9  | 0.9   | 6.7   | 0.6   | 7.6   | 2.4  | 5.8   | 2.7   | 5.8   | 4.0   |
| Nde1       | 29.3  | 31.6  | 35.0 | 27.9  | 30.0  | 28.0  | 36.1  | 33.2 | 30.1  | 31.1  | 35.7  | 33.6  |
| Ndel1      | 60.9  | 54.4  | 47.8 | 62.4  | 49.8  | 51.9  | 57.7  | 49.3 | 47.3  | 45.9  | 55.7  | 56.7  |
| Ndfip1     | 143.3 | 114.3 | 89.8 | 121.8 | 120.3 | 123.3 | 112.7 | 92.3 | 123.1 | 141.3 | 127.7 | 128.2 |
| Ndfip2     | 18.2  | 15.4  | 11.8 | 17.1  | 14.8  | 15.8  | 14.7  | 12.6 | 16.4  | 17.2  | 16.0  | 16.7  |
| Ndn        | 48.8  | 45.0  | 40.6 | 54.5  | 44.3  | 53.4  | 53.4  | 46.0 | 50.4  | 46.7  | 46.7  | 46.1  |
| Ndnf       | 0.7   | 2.1   | 4.5  | 0.5   | 0.9   | 0.2   | 2.6   | 2.7  | 3.4   | 1.6   | 1.5   | 3.9   |
| Ndnl2      | 11.6  | 10.1  | 11.9 | 9.4   | 10.3  | 11.7  | 13.4  | 11.8 | 11.3  | 11.9  | 12.3  | 11.8  |
| Ndor1      | 4.1   | 4.2   | 3.1  | 3.9   | 4.4   | 4.5   | 4.0   | 3.6  | 3.8   | 3.5   | 2.9   | 2.8   |
| Ndrg1      | 27.0  | 23.1  | 25.6 | 21.9  | 24.2  | 23.9  | 49.7  | 96.8 | 69.6  | 30.5  | 40.9  | 43.4  |
| Ndrg2      | 7.7   | 11.9  | 22.0 | 8.0   | 8.9   | 13.4  | 5.4   | 15.3 | 7.2   | 6.1   | 5.2   | 7.4   |
| Ndrg3      | 25.2  | 23.1  | 21.2 | 28.3  | 19.3  | 28.9  | 17.1  | 19.2 | 16.8  | 19.9  | 21.8  | 20.4  |
| Ndrg4      | 35.5  | 32.6  | 25.6 | 45.6  | 31.3  | 43.8  | 37.4  | 35.4 | 33.6  | 23.9  | 37.9  | 30.2  |
| Ndst1      | 16.1  | 18.0  | 17.3 | 15.7  | 16.3  | 15.7  | 22.4  | 18.1 | 19.6  | 15.9  | 17.2  | 17.2  |
| Ndst2      | 3.8   | 4.1   | 3.8  | 4.0   | 4.7   | 3.9   | 4.1   | 4.5  | 4.9   | 4.6   | 3.6   | 3.7   |
| Ndst3      | 0.4   | 0.4   | 0.2  | 0.4   | 0.5   | 0.2   | 0.3   | 0.2  | 0.1   | 0.1   | 0.1   | 0.1   |
| Ndst4      | 0.0   | 0.0   | 0.0  | 0.0   | 0.0   | 0.0   | 0.0   | 0.0  | 0.0   | 0.0   | 0.0   | 0.0   |
| Ndufa1     | 97.7  | 79.6  | 83.9 | 105.2 | 83.5  | 106.2 | 83.5  | 74.7 | 81.7  | 95.8  | 78.1  | 93.2  |
| Ndufa10    | 57.7  | 46.7  | 43.6 | 60.7  | 43.8  | 55.2  | 42.5  | 50.0 | 40.7  | 46.8  | 52.1  | 48.0  |
| Ndufa11    | 14.1  | 12.0  | 10.3 | 13.2  | 12.0  | 12.7  | 12.5  | 11.3 | 12.0  | 11.3  | 9.8   | 10.0  |

Online Table 1

|          |       |       |       |       |       |       |       |       |       |       |       |       |
|----------|-------|-------|-------|-------|-------|-------|-------|-------|-------|-------|-------|-------|
| Ndufa12  | 79.8  | 72.2  | 78.9  | 107.9 | 63.9  | 88.1  | 74.0  | 77.9  | 58.6  | 72.1  | 84.4  | 75.7  |
| Ndufa13  | 99.1  | 84.1  | 78.8  | 108.5 | 81.7  | 102.4 | 90.2  | 88.9  | 78.8  | 96.0  | 87.7  | 96.0  |
| Ndufa2   | 119.9 | 105.2 | 78.8  | 108.9 | 102.6 | 100.0 | 90.3  | 102.7 | 98.6  | 101.3 | 86.7  | 83.5  |
| Ndufa3   | 210.9 | 178.0 | 162.9 | 205.2 | 178.0 | 203.7 | 178.7 | 190.6 | 205.4 | 208.5 | 201.3 | 180.4 |
| Ndufa4   | 267.6 | 208.9 | 170.2 | 236.9 | 211.9 | 229.1 | 185.6 | 213.7 | 200.1 | 268.3 | 238.8 | 204.1 |
| Ndufa4l2 | 5.4   | 12.1  | 13.4  | 7.5   | 9.5   | 15.0  | 4.9   | 3.0   | 4.1   | 2.8   | 2.9   | 6.1   |
| Ndufa5   | 61.4  | 53.4  | 57.2  | 57.1  | 46.7  | 51.5  | 51.1  | 55.3  | 44.6  | 50.6  | 56.6  | 55.2  |
| Ndufa6   | 121.7 | 104.5 | 88.0  | 99.0  | 96.6  | 106.2 | 88.2  | 94.4  | 95.4  | 116.8 | 112.9 | 109.3 |
| Ndufa7   | 217.9 | 180.7 | 131.7 | 188.9 | 176.1 | 211.8 | 147.4 | 158.2 | 167.9 | 182.8 | 169.9 | 151.3 |
| Ndufa8   | 60.8  | 56.2  | 50.1  | 59.8  | 56.3  | 59.1  | 59.4  | 55.3  | 53.4  | 67.1  | 58.1  | 59.1  |
| Ndufa9   | 38.6  | 37.5  | 31.6  | 39.4  | 35.6  | 35.9  | 28.0  | 31.2  | 30.1  | 32.8  | 30.2  | 30.3  |
| Ndufab1  | 37.7  | 33.4  | 27.5  | 29.3  | 33.7  | 31.3  | 28.4  | 26.3  | 30.1  | 38.2  | 28.6  | 31.7  |
| Ndufaf1  | 12.4  | 11.6  | 9.8   | 12.5  | 8.7   | 13.3  | 8.3   | 9.0   | 8.9   | 12.1  | 10.9  | 12.5  |
| Ndufaf2  | 25.7  | 26.2  | 33.5  | 31.9  | 23.9  | 28.8  | 30.6  | 27.7  | 24.5  | 25.2  | 31.1  | 33.7  |
| Ndufaf3  | 12.8  | 13.2  | 10.2  | 14.9  | 12.1  | 17.8  | 9.1   | 13.7  | 12.7  | 12.3  | 12.3  | 12.7  |
| Ndufaf4  | 3.0   | 3.2   | 3.0   | 3.8   | 3.0   | 3.7   | 2.9   | 2.8   | 3.1   | 3.6   | 3.9   | 3.8   |
| Ndufaf5  | 3.1   | 2.4   | 2.3   | 2.7   | 2.4   | 2.5   | 2.3   | 2.1   | 1.9   | 2.0   | 2.6   | 2.1   |
| Ndufaf6  | 2.8   | 2.4   | 2.5   | 2.4   | 2.3   | 3.5   | 2.4   | 2.0   | 2.6   | 3.4   | 2.8   | 2.4   |
| Ndufaf7  | 7.4   | 6.5   | 6.2   | 6.1   | 5.8   | 7.8   | 6.3   | 6.9   | 5.6   | 6.4   | 6.5   | 6.9   |
| Ndufb10  | 88.8  | 73.9  | 78.6  | 84.2  | 67.0  | 82.3  | 81.4  | 78.9  | 73.5  | 85.3  | 90.7  | 98.9  |
| Ndufb11  | 58.2  | 52.9  | 51.3  | 54.7  | 50.1  | 54.4  | 49.7  | 51.3  | 54.3  | 69.5  | 54.4  | 60.1  |
| Ndufb2   | 55.4  | 42.7  | 34.2  | 43.3  | 43.8  | 48.6  | 37.4  | 43.0  | 43.0  | 51.1  | 38.8  | 38.8  |
| Ndufb3   | 73.6  | 59.1  | 64.9  | 66.1  | 59.5  | 76.5  | 55.2  | 55.7  | 53.5  | 70.5  | 62.1  | 68.6  |
| Ndufb4   | 143.2 | 130.5 | 124.7 | 132.0 | 113.9 | 147.8 | 121.4 | 126.9 | 117.3 | 128.8 | 142.1 | 134.0 |
| Ndufb5   | 49.1  | 42.6  | 38.9  | 42.5  | 42.5  | 47.7  | 33.3  | 41.9  | 38.2  | 49.1  | 40.8  | 41.3  |
| Ndufb6   | 89.5  | 83.1  | 61.7  | 75.9  | 75.7  | 76.9  | 50.7  | 46.3  | 69.1  | 74.5  | 61.8  | 61.2  |
| Ndufb7   | 86.8  | 74.6  | 69.4  | 95.4  | 81.7  | 86.9  | 85.5  | 76.0  | 70.6  | 81.3  | 77.2  | 80.6  |
| Ndufb8   | 106.5 | 99.2  | 84.6  | 102.9 | 95.5  | 102.2 | 92.2  | 78.0  | 78.4  | 84.5  | 88.6  | 81.4  |
| Ndufb9   | 99.3  | 93.9  | 86.3  | 93.2  | 79.7  | 89.4  | 82.3  | 92.6  | 77.3  | 89.8  | 87.7  | 85.0  |
| Ndufc1   | 98.1  | 93.3  | 64.6  | 77.8  | 89.6  | 86.5  | 60.5  | 69.4  | 82.1  | 93.5  | 75.0  | 76.2  |
| Ndufc2   | 51.6  | 56.4  | 49.5  | 51.9  | 56.1  | 53.6  | 46.8  | 45.2  | 51.9  | 62.0  | 59.2  | 52.2  |
| Ndufs1   | 31.7  | 31.1  | 28.5  | 30.3  | 28.5  | 29.9  | 27.5  | 28.1  | 27.3  | 30.2  | 31.0  | 31.0  |
| Ndufs2   | 79.3  | 76.0  | 68.5  | 74.8  | 72.0  | 73.5  | 68.1  | 72.9  | 72.0  | 85.5  | 79.8  | 77.0  |
| Ndufs3   | 56.3  | 52.5  | 43.2  | 45.5  | 48.0  | 47.8  | 43.8  | 43.8  | 46.1  | 49.8  | 43.5  | 43.2  |
| Ndufs4   | 32.1  | 29.9  | 24.2  | 23.7  | 26.3  | 25.4  | 21.8  | 25.8  | 27.4  | 31.1  | 25.5  | 28.6  |
| Ndufs5   | 47.2  | 45.0  | 33.5  | 54.1  | 44.0  | 47.1  | 45.1  | 42.9  | 43.4  | 44.0  | 39.3  | 42.4  |
| Ndufs6   | 63.4  | 57.5  | 59.4  | 71.1  | 56.4  | 62.0  | 58.2  | 67.2  | 55.4  | 64.8  | 58.5  | 60.2  |
| Ndufs7   | 36.1  | 36.1  | 27.5  | 35.4  | 30.6  | 40.1  | 30.7  | 36.1  | 36.9  | 33.3  | 32.1  | 27.3  |
| Ndufs8   | 26.6  | 17.9  | 18.2  | 26.5  | 23.3  | 24.0  | 24.8  | 32.1  | 24.0  | 25.4  | 32.2  | 23.9  |
| Ndufv1   | 33.4  | 32.6  | 28.5  | 33.4  | 30.1  | 29.9  | 30.1  | 29.6  | 30.6  | 31.5  | 26.6  | 27.6  |
| Ndufv2   | 34.3  | 35.9  | 31.2  | 32.7  | 30.4  | 33.7  | 29.8  | 36.2  | 30.2  | 36.3  | 38.2  | 32.9  |
| Ndufv3   | 98.5  | 91.5  | 92.6  | 98.1  | 85.3  | 95.7  | 87.6  | 113.8 | 88.9  | 102.3 | 103.1 | 104.7 |
| Neat1    | 62.8  | 101.6 | 99.0  | 60.7  | 76.8  | 84.3  | 81.9  | 79.1  | 88.3  | 60.9  | 53.4  | 74.1  |
| Neb      | 0.4   | 0.6   | 0.6   | 0.4   | 0.4   | 0.5   | 0.4   | 0.3   | 0.3   | 0.3   | 0.4   | 0.3   |
| Nebi     | 0.1   | 0.1   | 0.0   | 0.1   | 0.0   | 0.2   | 0.1   | 0.0   | 0.0   | 0.2   | 0.1   | 0.1   |
| Necab1   | 0.0   | 0.0   | 0.0   | 0.0   | 0.0   | 0.1   | 0.1   | 0.0   | 0.0   | 0.0   | 0.0   | 0.0   |
| Necab2   | 0.0   | 0.0   | 0.0   | 0.0   | 0.0   | 0.0   | 0.0   | 0.1   | 0.0   | 0.0   | 0.0   | 0.1   |
| Necab3   | 0.2   | 0.2   | 0.2   | 0.1   | 0.2   | 0.0   | 0.3   | 0.1   | 0.1   | 0.1   | 0.1   | 0.1   |
| Necap1   | 17.2  | 16.6  | 14.7  | 19.7  | 16.1  | 17.0  | 15.4  | 13.7  | 13.5  | 13.9  | 16.1  | 13.8  |
| Necap2   | 45.2  | 38.9  | 32.7  | 47.6  | 44.1  | 50.2  | 41.3  | 34.1  | 37.5  | 36.1  | 37.2  | 35.0  |
| Nedd1    | 6.8   | 6.9   | 7.5   | 5.6   | 7.2   | 6.2   | 6.5   | 6.6   | 7.4   | 7.4   | 7.7   | 6.8   |
| Nedd4    | 296.0 | 301.2 | 348.6 | 259.7 | 292.7 | 292.2 | 329.2 | 404.4 | 355.4 | 368.7 | 380.4 | 392.9 |
| Nedd4l   | 12.1  | 12.3  | 10.9  | 17.3  | 12.9  | 16.9  | 9.8   | 6.6   | 5.7   | 8.2   | 8.0   | 7.2   |
| Nedd8    | 154.2 | 132.1 | 124.7 | 188.0 | 143.6 | 155.1 | 150.6 | 146.6 | 132.6 | 147.2 | 154.3 | 147.6 |
| Nedd9    | 30.1  | 34.3  | 39.9  | 41.1  | 37.3  | 28.8  | 44.7  | 38.3  | 50.7  | 28.9  | 37.3  | 52.0  |
| Nefh     | 0.0   | 0.0   | 0.0   | 0.0   | 0.0   | 0.0   | 0.0   | 0.0   | 0.0   | 0.0   | 0.0   | 0.0   |
| Nefl     | 0.0   | 0.0   | 0.0   | 0.0   | 0.0   | 0.1   | 0.0   | 0.0   | 0.0   | 0.0   | 0.0   | 0.0   |

Online Table 1

|          |       |      |      |       |      |       |      |       |      |      |      |      |
|----------|-------|------|------|-------|------|-------|------|-------|------|------|------|------|
| Nefm     | 0.1   | 0.1  | 0.0  | 0.1   | 0.0  | 0.1   | 0.3  | 0.1   | 0.1  | 0.0  | 0.1  | 0.1  |
| Negr1    | 0.2   | 0.4  | 0.6  | 0.1   | 0.3  | 0.4   | 0.2  | 0.5   | 0.2  | 0.1  | 0.2  | 0.2  |
| Neil1    | 2.0   | 2.7  | 2.9  | 1.9   | 2.3  | 2.6   | 1.9  | 2.0   | 2.1  | 2.0  | 2.3  | 2.6  |
| Neil2    | 1.6   | 1.7  | 1.5  | 1.0   | 1.1  | 2.2   | 0.6  | 0.7   | 0.6  | 0.9  | 0.6  | 0.9  |
| Neil3    | 0.6   | 1.9  | 3.1  | 0.4   | 2.6  | 0.2   | 2.4  | 0.8   | 1.5  | 0.7  | 1.5  | 1.0  |
| Nek1     | 6.5   | 6.8  | 7.7  | 6.1   | 6.1  | 7.3   | 6.0  | 6.3   | 5.5  | 5.6  | 7.3  | 6.6  |
| Nek10    | 0.0   | 0.0  | 0.0  | 0.0   | 0.0  | 0.0   | 0.0  | 0.0   | 0.0  | 0.1  | 0.0  | 0.0  |
| Nek11    | 0.1   | 0.1  | 0.2  | 0.3   | 0.0  | 0.1   | 0.1  | 0.2   | 0.1  | 0.0  | 0.0  | 0.1  |
| Nek2     | 1.4   | 2.4  | 3.4  | 0.4   | 3.7  | 0.9   | 4.6  | 1.6   | 3.6  | 1.4  | 3.2  | 1.8  |
| Nek3     | 1.4   | 1.6  | 2.1  | 1.8   | 1.7  | 1.6   | 2.4  | 1.6   | 1.7  | 1.9  | 1.9  | 1.6  |
| Nek4     | 5.6   | 5.8  | 5.1  | 6.1   | 4.3  | 6.2   | 4.6  | 4.3   | 4.1  | 4.5  | 5.4  | 6.0  |
| Nek5     | 0.2   | 0.1  | 0.1  | 0.2   | 0.1  | 0.3   | 0.2  | 0.1   | 0.0  | 0.1  | 0.1  | 0.1  |
| Nek6     | 26.0  | 34.0 | 35.8 | 27.7  | 32.9 | 25.8  | 32.5 | 32.5  | 36.4 | 36.2 | 29.5 | 37.4 |
| Nek7     | 45.2  | 37.3 | 33.8 | 46.8  | 36.1 | 48.6  | 39.8 | 28.9  | 35.3 | 38.7 | 43.9 | 41.8 |
| Nek8     | 4.0   | 3.8  | 2.9  | 4.1   | 3.2  | 4.3   | 3.6  | 4.3   | 5.0  | 3.4  | 3.5  | 3.1  |
| Nek9     | 35.6  | 29.8 | 25.2 | 40.5  | 28.5 | 38.4  | 22.9 | 19.9  | 22.6 | 28.1 | 23.8 | 26.9 |
| Nelfa    | 5.6   | 5.7  | 6.5  | 4.4   | 5.4  | 4.8   | 6.2  | 6.7   | 5.9  | 5.0  | 6.2  | 5.4  |
| Nelfb    | 21.4  | 25.1 | 21.9 | 18.2  | 20.4 | 21.6  | 20.7 | 19.2  | 23.6 | 18.6 | 18.8 | 18.3 |
| Nelfcd   | 7.5   | 8.9  | 9.2  | 8.1   | 8.2  | 7.7   | 8.8  | 8.4   | 8.1  | 6.8  | 6.5  | 6.7  |
| Nelfe    | 17.2  | 18.1 | 16.6 | 16.0  | 14.4 | 15.6  | 15.9 | 15.3  | 14.6 | 14.1 | 15.3 | 15.2 |
| Nell2    | 0.1   | 0.0  | 0.0  | 0.1   | 0.0  | 0.1   | 0.0  | 0.0   | 0.0  | 0.1  | 0.1  | 0.0  |
| Nemf     | 23.0  | 19.9 | 22.8 | 22.5  | 17.5 | 22.4  | 20.2 | 17.9  | 16.3 | 19.3 | 23.1 | 23.8 |
| Nenf     | 100.0 | 81.6 | 83.0 | 84.4  | 66.8 | 96.5  | 86.6 | 83.1  | 89.0 | 87.5 | 79.3 | 96.0 |
| Neo1     | 16.6  | 17.4 | 19.3 | 12.1  | 15.1 | 13.6  | 19.7 | 22.1  | 23.9 | 21.9 | 20.8 | 23.3 |
| Nepn     | 0.0   | 0.0  | 0.0  | 0.0   | 0.0  | 0.0   | 0.0  | 0.0   | 0.0  | 0.0  | 0.0  | 0.0  |
| Nes      | 3.9   | 1.4  | 1.4  | 5.2   | 10.2 | 6.3   | 5.4  | 2.1   | 2.7  | 3.3  | 3.3  | 3.1  |
| Nespas   | 0.4   | 0.3  | 0.2  | 0.3   | 0.3  | 0.5   | 0.2  | 0.5   | 0.3  | 0.2  | 0.5  | 0.1  |
| Net1     | 1.3   | 1.1  | 1.5  | 0.7   | 1.2  | 0.8   | 1.4  | 0.8   | 1.1  | 7.6  | 3.1  | 2.2  |
| Neto1    | 0.0   | 0.0  | 0.0  | 0.0   | 0.0  | 0.0   | 0.0  | 0.0   | 0.0  | 0.0  | 0.0  | 0.0  |
| Neto2    | 0.6   | 0.4  | 0.6  | 0.6   | 0.6  | 0.6   | 0.5  | 0.4   | 0.3  | 0.8  | 0.7  | 0.6  |
| Neu1     | 8.1   | 7.6  | 6.2  | 9.5   | 8.7  | 10.4  | 5.5  | 5.5   | 5.4  | 6.2  | 5.2  | 6.7  |
| Neu3     | 1.3   | 1.7  | 1.6  | 1.1   | 1.3  | 1.4   | 1.8  | 1.7   | 1.9  | 2.1  | 1.9  | 2.2  |
| Neur1a   | 0.5   | 0.4  | 0.3  | 0.4   | 0.3  | 0.5   | 0.3  | 0.4   | 0.3  | 0.4  | 0.5  | 0.2  |
| Neur1b   | 0.5   | 1.2  | 1.9  | 0.2   | 1.6  | 0.3   | 1.6  | 0.8   | 1.6  | 1.1  | 1.2  | 0.8  |
| Neur12   | 1.4   | 0.9  | 1.0  | 1.5   | 1.1  | 2.0   | 1.4  | 0.9   | 1.0  | 1.6  | 1.3  | 1.0  |
| Neur13   | 1.0   | 0.2  | 0.4  | 4.3   | 10.5 | 0.7   | 1.3  | 0.3   | 0.4  | 1.2  | 0.5  | 0.6  |
| Neur14   | 3.5   | 3.9  | 4.1  | 4.0   | 3.6  | 3.3   | 3.8  | 4.0   | 4.4  | 3.9  | 3.6  | 3.4  |
| Nexn     | 10.6  | 7.5  | 9.7  | 16.4  | 8.6  | 13.6  | 14.3 | 8.1   | 7.9  | 7.0  | 14.0 | 13.6 |
| Nf1      | 4.2   | 5.2  | 4.6  | 4.2   | 4.7  | 4.9   | 4.3  | 4.4   | 4.1  | 4.8  | 4.6  | 4.4  |
| Nf2      | 24.3  | 21.4 | 21.0 | 28.3  | 19.2 | 24.6  | 21.6 | 14.2  | 14.0 | 18.1 | 22.4 | 19.9 |
| Nfam1    | 0.3   | 0.1  | 0.2  | 2.4   | 4.2  | 0.1   | 0.5  | 0.1   | 0.0  | 0.2  | 0.1  | 0.3  |
| Nfasc    | 0.2   | 0.3  | 0.5  | 0.1   | 0.3  | 0.1   | 0.2  | 0.5   | 0.1  | 0.2  | 0.1  | 0.2  |
| Nfat5    | 3.4   | 4.0  | 3.9  | 4.5   | 3.7  | 4.1   | 4.4  | 3.4   | 3.4  | 3.2  | 3.1  | 3.0  |
| Nfatc1   | 1.6   | 2.1  | 2.1  | 2.7   | 2.8  | 2.5   | 2.8  | 2.3   | 2.0  | 1.6  | 1.6  | 2.0  |
| Nfatc2   | 0.1   | 0.1  | 0.0  | 0.2   | 0.4  | 0.0   | 0.0  | 0.0   | 0.0  | 0.0  | 0.0  | 0.0  |
| Nfatc2ip | 0.5   | 0.5  | 0.7  | 0.5   | 0.5  | 0.5   | 0.5  | 0.5   | 0.4  | 0.5  | 0.5  | 0.7  |
| Nfatc3   | 8.2   | 9.8  | 9.1  | 7.3   | 7.8  | 8.8   | 8.8  | 8.9   | 8.6  | 8.4  | 8.9  | 8.2  |
| Nfatc4   | 3.1   | 3.8  | 4.3  | 3.0   | 2.7  | 3.9   | 3.7  | 4.9   | 4.4  | 4.8  | 3.5  | 4.4  |
| Nfe2     | 0.1   | 0.0  | 0.2  | 0.0   | 0.2  | 0.1   | 0.3  | 0.1   | 0.1  | 0.1  | 0.0  | 0.1  |
| Nfe2l1   | 126.1 | 86.4 | 83.8 | 165.7 | 92.4 | 167.4 | 96.8 | 101.5 | 80.2 | 69.0 | 88.0 | 85.4 |
| Nfe2l2   | 61.6  | 54.8 | 57.3 | 78.9  | 69.1 | 60.9  | 65.8 | 54.0  | 50.9 | 65.3 | 66.6 | 71.2 |
| Nfe2l3   | 0.6   | 0.5  | 0.5  | 0.5   | 0.4  | 0.3   | 0.5  | 0.6   | 0.5  | 2.4  | 1.4  | 0.7  |
| Nfia     | 6.3   | 9.2  | 11.6 | 6.2   | 6.1  | 6.2   | 6.7  | 8.9   | 6.2  | 4.4  | 5.9  | 6.3  |
| Nfib     | 11.0  | 13.3 | 14.5 | 13.4  | 10.9 | 14.2  | 12.1 | 13.6  | 9.4  | 12.4 | 11.2 | 10.8 |
| Nfic     | 3.9   | 5.0  | 5.6  | 5.0   | 5.6  | 4.9   | 6.6  | 6.3   | 6.1  | 5.0  | 5.2  | 4.6  |
| Nfil3    | 4.8   | 4.6  | 6.0  | 2.9   | 5.7  | 2.3   | 8.0  | 9.0   | 8.0  | 6.4  | 6.4  | 6.7  |
| Nfix     | 10.6  | 14.2 | 16.3 | 10.9  | 11.7 | 12.6  | 14.0 | 17.6  | 15.0 | 11.4 | 12.0 | 12.1 |

Online Table 1

|           |       |       |       |       |       |       |       |       |      |       |       |       |
|-----------|-------|-------|-------|-------|-------|-------|-------|-------|------|-------|-------|-------|
| Nfkb1     | 20.2  | 23.7  | 26.1  | 21.8  | 27.0  | 19.8  | 28.1  | 29.4  | 27.9 | 18.1  | 22.1  | 21.5  |
| Nfkb2     | 15.9  | 14.5  | 16.6  | 16.0  | 23.5  | 15.1  | 24.1  | 16.2  | 18.6 | 16.0  | 16.0  | 16.8  |
| Nfkbia    | 20.7  | 18.9  | 30.2  | 25.6  | 44.2  | 15.5  | 32.3  | 25.4  | 23.1 | 25.0  | 21.3  | 26.9  |
| Nfkbib    | 6.9   | 6.7   | 5.8   | 8.0   | 7.5   | 6.0   | 8.7   | 8.5   | 7.1  | 6.2   | 6.4   | 6.4   |
| Nfkbid    | 0.2   | 0.1   | 0.2   | 0.3   | 0.8   | 0.1   | 0.2   | 0.2   | 0.1  | 0.2   | 0.2   | 0.1   |
| Nfkbie    | 4.6   | 2.8   | 3.7   | 7.2   | 9.8   | 6.8   | 6.7   | 4.0   | 3.8  | 3.4   | 3.5   | 3.7   |
| Nfkbil1   | 5.7   | 4.6   | 5.5   | 4.9   | 4.4   | 5.5   | 4.1   | 5.0   | 3.8  | 4.7   | 5.1   | 4.9   |
| Nfkbiz    | 9.0   | 8.1   | 8.4   | 7.4   | 11.9  | 6.8   | 11.8  | 10.8  | 8.4  | 12.3  | 9.8   | 8.4   |
| Nfrkb     | 2.7   | 2.4   | 2.8   | 2.5   | 3.0   | 2.6   | 3.2   | 2.9   | 2.5  | 2.7   | 2.8   | 2.0   |
| Nfs1      | 18.5  | 19.4  | 17.3  | 16.8  | 17.3  | 18.0  | 15.4  | 17.0  | 16.9 | 16.4  | 17.6  | 16.4  |
| Nfu1      | 35.0  | 31.5  | 28.7  | 43.2  | 29.9  | 37.3  | 29.5  | 27.3  | 30.6 | 29.4  | 29.9  | 30.8  |
| Nfx1      | 13.7  | 13.6  | 13.6  | 12.4  | 12.0  | 13.3  | 12.4  | 12.3  | 11.6 | 12.3  | 13.9  | 13.3  |
| Nfxl1     | 3.4   | 3.8   | 2.9   | 3.2   | 3.6   | 2.6   | 2.8   | 3.8   | 3.9  | 3.9   | 3.9   | 3.6   |
| Nfya      | 3.7   | 4.3   | 4.9   | 3.9   | 6.1   | 3.8   | 4.4   | 5.0   | 4.9  | 4.4   | 4.5   | 4.2   |
| Nfyb      | 10.8  | 9.3   | 8.8   | 10.4  | 7.9   | 10.5  | 9.7   | 7.1   | 7.2  | 8.9   | 9.5   | 11.9  |
| Nfyc      | 7.3   | 7.7   | 8.0   | 7.7   | 7.7   | 6.7   | 9.1   | 11.1  | 8.9  | 8.3   | 8.7   | 8.0   |
| Ngb       | 0.1   | 0.2   | 0.1   | 0.1   | 0.0   | 0.1   | 0.1   | 0.1   | 0.1  | 0.1   | 0.0   | 0.0   |
| Ngdn      | 15.8  | 14.4  | 11.5  | 14.5  | 14.1  | 13.0  | 14.0  | 13.5  | 14.2 | 15.7  | 15.3  | 14.8  |
| Ngef      | 0.1   | 0.1   | 0.2   | 0.0   | 0.1   | 0.1   | 0.1   | 0.1   | 0.1  | 0.2   | 0.1   | 0.2   |
| Ngf       | 190.9 | 185.3 | 137.9 | 302.9 | 167.3 | 273.0 | 151.4 | 77.6  | 80.0 | 102.6 | 104.3 | 120.8 |
| Ngfr      | 0.2   | 0.1   | 0.1   | 0.1   | 0.0   | 0.1   | 0.0   | 0.1   | 0.0  | 0.0   | 0.0   | 0.1   |
| Ngfrap1   | 37.8  | 24.8  | 28.6  | 39.2  | 22.5  | 44.8  | 34.2  | 25.2  | 21.8 | 35.5  | 37.6  | 30.9  |
| Ngly1     | 11.0  | 9.8   | 10.3  | 8.3   | 8.9   | 8.8   | 9.2   | 9.4   | 9.8  | 11.4  | 11.6  | 11.4  |
| Ngrn      | 8.7   | 8.5   | 8.1   | 9.4   | 7.6   | 12.6  | 6.0   | 6.3   | 7.9  | 9.3   | 8.4   | 9.4   |
| Nhej1     | 3.6   | 4.0   | 1.8   | 4.1   | 3.3   | 4.2   | 3.6   | 4.9   | 3.7  | 3.9   | 3.1   | 3.1   |
| Nhlh1     | 0.0   | 0.1   | 0.0   | 0.0   | 0.0   | 0.0   | 0.0   | 0.0   | 0.0  | 0.0   | 0.0   | 0.0   |
| Nhlrc1    | 1.1   | 0.8   | 0.5   | 1.5   | 0.9   | 1.5   | 0.8   | 0.6   | 0.8  | 1.0   | 0.9   | 1.3   |
| Nhlrc2    | 11.3  | 10.4  | 9.8   | 12.1  | 9.8   | 13.1  | 9.0   | 8.3   | 7.7  | 8.4   | 8.7   | 7.9   |
| Nhlrc3    | 12.5  | 10.3  | 8.2   | 16.0  | 11.2  | 18.1  | 8.8   | 9.1   | 8.7  | 8.3   | 10.9  | 9.8   |
| Nhlrc4    | 0.1   | 0.1   | 0.1   | 0.0   | 0.1   | 0.1   | 0.0   | 0.0   | 0.0  | 0.0   | 0.0   | 0.0   |
| Nhp2      | 19.8  | 15.9  | 15.5  | 19.7  | 18.8  | 20.2  | 20.8  | 17.5  | 16.0 | 21.5  | 18.8  | 19.2  |
| Nhp2l1    | 45.4  | 45.3  | 40.8  | 46.4  | 45.1  | 44.3  | 46.3  | 43.9  | 42.0 | 52.1  | 47.8  | 44.5  |
| Nhs       | 3.4   | 2.9   | 3.6   | 3.3   | 3.8   | 1.4   | 4.8   | 2.5   | 3.4  | 3.1   | 3.6   | 4.5   |
| Nhsl1     | 1.1   | 1.3   | 1.4   | 0.8   | 0.9   | 0.6   | 1.4   | 2.5   | 1.4  | 1.5   | 1.4   | 1.2   |
| Nhsl2     | 0.1   | 0.0   | 0.1   | 0.1   | 0.1   | 0.1   | 0.0   | 0.1   | 0.1  | 0.1   | 0.1   | 0.1   |
| Niacr1    | 0.0   | 0.0   | 0.0   | 0.4   | 0.8   | 0.0   | 0.2   | 0.0   | 0.0  | 0.1   | 0.0   | 0.0   |
| Nicn1     | 14.6  | 12.4  | 12.5  | 13.9  | 9.8   | 17.0  | 11.4  | 11.7  | 11.1 | 10.4  | 11.4  | 10.5  |
| Nid1      | 46.2  | 57.9  | 79.3  | 41.6  | 59.9  | 66.3  | 62.7  | 101.8 | 77.1 | 51.4  | 53.3  | 49.8  |
| Nid2      | 13.4  | 17.3  | 30.0  | 4.9   | 12.8  | 2.3   | 17.6  | 22.2  | 20.7 | 10.8  | 7.7   | 10.6  |
| Nif3l1    | 11.8  | 10.0  | 9.1   | 12.8  | 10.2  | 12.8  | 10.5  | 9.7   | 8.8  | 10.2  | 11.7  | 9.5   |
| Nim1      | 0.7   | 0.8   | 1.1   | 0.6   | 0.6   | 0.9   | 1.1   | 1.2   | 1.2  | 0.6   | 0.9   | 0.8   |
| Nin       | 7.1   | 8.0   | 9.6   | 8.3   | 8.5   | 7.0   | 9.6   | 8.5   | 8.4  | 6.0   | 8.3   | 8.1   |
| Ninj1     | 47.8  | 39.9  | 33.2  | 65.1  | 53.8  | 47.4  | 38.2  | 33.2  | 30.0 | 43.2  | 37.9  | 32.6  |
| Ninl      | 16.1  | 16.8  | 15.7  | 15.2  | 13.7  | 15.1  | 10.5  | 6.2   | 8.7  | 12.3  | 9.9   | 12.4  |
| Nip7      | 7.6   | 5.6   | 4.9   | 7.3   | 6.8   | 7.1   | 5.9   | 6.7   | 5.6  | 7.2   | 6.4   | 5.5   |
| Nipa1     | 9.4   | 9.1   | 9.3   | 9.2   | 8.4   | 9.2   | 9.8   | 5.5   | 8.6  | 8.9   | 9.9   | 10.1  |
| Nipa2     | 8.4   | 9.7   | 8.9   | 8.4   | 11.0  | 8.2   | 8.2   | 8.8   | 9.9  | 11.2  | 10.4  | 9.9   |
| Nipal1    | 0.1   | 0.1   | 0.1   | 0.0   | 0.2   | 0.1   | 0.3   | 0.2   | 0.2  | 0.3   | 0.2   | 0.3   |
| Nipal2    | 0.1   | 0.1   | 0.1   | 0.0   | 0.1   | 0.1   | 0.1   | 0.0   | 0.0  | 0.1   | 0.1   | 0.1   |
| Nipal3    | 2.4   | 1.5   | 1.1   | 2.8   | 1.4   | 2.7   | 1.3   | 1.5   | 1.2  | 1.8   | 2.0   | 1.5   |
| Nipal4    | 0.9   | 1.4   | 1.6   | 0.8   | 1.5   | 0.4   | 1.3   | 0.8   | 0.8  | 0.7   | 1.1   | 0.8   |
| Nipbl     | 8.0   | 9.3   | 9.6   | 7.5   | 8.3   | 8.2   | 8.1   | 9.3   | 8.1  | 8.4   | 8.8   | 9.1   |
| Nipsnap1  | 3.7   | 1.9   | 1.5   | 1.5   | 1.2   | 3.4   | 1.1   | 0.9   | 0.7  | 2.3   | 1.8   | 1.4   |
| Nipsnap3b | 12.3  | 12.0  | 13.5  | 12.4  | 13.2  | 10.6  | 12.8  | 12.8  | 16.1 | 11.2  | 14.9  | 13.4  |
| Nisch     | 53.0  | 56.0  | 56.5  | 47.3  | 51.4  | 48.0  | 56.3  | 62.7  | 55.1 | 54.1  | 50.3  | 50.2  |
| Nit1      | 29.7  | 31.7  | 24.7  | 27.4  | 23.3  | 34.3  | 23.1  | 24.2  | 23.9 | 28.2  | 27.0  | 24.2  |
| Nit2      | 13.0  | 13.2  | 9.5   | 11.9  | 9.1   | 14.5  | 7.0   | 9.1   | 9.0  | 12.1  | 9.6   | 10.0  |

Online Table 1

|           |       |       |       |       |       |       |       |       |       |       |       |       |
|-----------|-------|-------|-------|-------|-------|-------|-------|-------|-------|-------|-------|-------|
| Nkain1    | 7.8   | 4.1   | 3.1   | 7.9   | 4.7   | 9.7   | 4.6   | 3.2   | 2.8   | 4.4   | 3.8   | 4.2   |
| Nkain2    | 0.7   | 0.8   | 0.7   | 0.8   | 0.5   | 1.2   | 0.6   | 0.5   | 0.4   | 0.4   | 0.6   | 0.4   |
| Nkain3    | 0.3   | 0.1   | 0.1   | 0.3   | 0.3   | 0.1   | 0.2   | 0.3   | 0.4   | 0.6   | 0.3   | 0.4   |
| Nkain4    | 41.8  | 20.6  | 10.8  | 29.9  | 12.3  | 25.2  | 17.0  | 16.4  | 11.3  | 19.9  | 17.0  | 14.7  |
| Nkap      | 5.8   | 5.9   | 6.9   | 5.1   | 4.8   | 5.9   | 5.5   | 5.6   | 5.4   | 5.4   | 5.8   | 6.0   |
| Nkapl     | 0.4   | 0.6   | 0.6   | 0.3   | 0.3   | 0.3   | 0.5   | 0.4   | 0.2   | 0.4   | 0.6   | 0.7   |
| Nkd1      | 0.8   | 1.4   | 1.1   | 0.5   | 0.4   | 0.5   | 0.9   | 1.1   | 1.1   | 3.0   | 1.6   | 2.0   |
| Nkd2      | 17.6  | 24.4  | 26.1  | 26.0  | 32.1  | 22.8  | 55.4  | 40.6  | 42.6  | 37.5  | 37.9  | 40.9  |
| Nkiras1   | 3.1   | 2.6   | 2.5   | 3.8   | 2.3   | 3.4   | 2.3   | 1.8   | 2.1   | 2.1   | 2.8   | 2.4   |
| Nkiras2   | 4.8   | 4.7   | 4.5   | 5.8   | 4.9   | 5.0   | 4.7   | 4.8   | 5.3   | 4.2   | 5.0   | 4.3   |
| Nkpd1     | 0.0   | 0.0   | 0.0   | 0.0   | 0.0   | 0.1   | 0.0   | 0.0   | 0.0   | 0.0   | 0.0   | 0.0   |
| Nkrf      | 1.5   | 1.6   | 1.3   | 1.4   | 1.7   | 1.6   | 1.7   | 1.4   | 1.7   | 1.6   | 1.8   | 1.4   |
| Nktr      | 12.1  | 12.7  | 12.0  | 12.2  | 12.3  | 11.2  | 13.1  | 11.9  | 11.8  | 11.3  | 13.0  | 13.4  |
| Nkx2-1    | 0.0   | 0.0   | 0.0   | 0.0   | 0.0   | 0.0   | 0.0   | 0.0   | 0.0   | 0.0   | 0.0   | 0.0   |
| Nkx2-5    | 0.2   | 0.0   | 0.1   | 0.0   | 0.0   | 0.0   | 0.0   | 0.3   | 0.0   | 0.0   | 0.0   | 0.0   |
| Nkx2-9    | 0.3   | 0.3   | 0.1   | 0.1   | 0.3   | 0.1   | 0.1   | 0.0   | 0.1   | 0.1   | 0.2   | 0.0   |
| Nkx6-2    | 0.6   | 0.6   | 0.5   | 0.6   | 0.6   | 0.8   | 0.6   | 0.3   | 0.8   | 0.4   | 0.4   | 0.5   |
| Nle1      | 2.4   | 1.8   | 1.2   | 2.8   | 2.4   | 2.2   | 2.3   | 1.9   | 2.3   | 2.4   | 2.5   | 1.9   |
| Nlgn1     | 0.1   | 0.0   | 0.1   | 0.0   | 0.0   | 0.1   | 0.1   | 0.0   | 0.0   | 0.0   | 0.0   | 0.0   |
| Nlgn2     | 4.0   | 6.1   | 7.9   | 3.7   | 4.8   | 4.1   | 6.3   | 7.3   | 6.8   | 5.4   | 4.3   | 4.7   |
| Nlgn3     | 0.0   | 0.0   | 0.1   | 0.0   | 0.0   | 0.0   | 0.0   | 0.0   | 0.0   | 0.0   | 0.0   | 0.0   |
| Nlk       | 4.9   | 4.8   | 4.3   | 6.0   | 6.1   | 5.7   | 4.9   | 4.0   | 4.8   | 5.1   | 5.2   | 4.6   |
| Nln       | 12.1  | 9.6   | 8.2   | 12.6  | 10.2  | 12.4  | 9.7   | 8.9   | 9.2   | 9.8   | 9.5   | 9.7   |
| Nlrc3     | 1.3   | 0.5   | 0.4   | 1.3   | 0.6   | 0.9   | 0.3   | 0.3   | 0.3   | 0.6   | 0.3   | 0.4   |
| Nlrc4     | 0.1   | 0.0   | 0.0   | 0.3   | 0.7   | 0.0   | 0.1   | 0.0   | 0.0   | 0.1   | 0.0   | 0.1   |
| Nlrc5     | 1.2   | 1.0   | 0.9   | 1.6   | 1.3   | 0.7   | 0.5   | 0.4   | 0.2   | 0.2   | 0.4   | 0.5   |
| Nlrp10    | 0.1   | 0.0   | 0.0   | 0.1   | 0.0   | 0.0   | 0.0   | 0.0   | 0.0   | 0.0   | 0.1   | 0.0   |
| Nlrp12    | 0.1   | 0.0   | 0.0   | 0.1   | 0.0   | 0.1   | 0.0   | 0.0   | 0.0   | 0.0   | 0.0   | 0.0   |
| Nlrp1a    | 0.3   | 0.5   | 0.3   | 0.5   | 1.2   | 0.4   | 0.4   | 0.4   | 0.3   | 0.3   | 0.2   | 0.4   |
| Nlrp1b    | 0.1   | 0.0   | 0.0   | 0.5   | 1.3   | 0.0   | 0.1   | 0.0   | 0.0   | 0.0   | 0.0   | 0.0   |
| Nlrp1c-ps | 0.0   | 0.0   | 0.0   | 0.2   | 0.4   | 0.0   | 0.1   | 0.0   | 0.0   | 0.0   | 0.0   | 0.0   |
| Nlrp3     | 0.3   | 0.1   | 0.0   | 1.5   | 3.7   | 0.0   | 0.5   | 0.0   | 0.2   | 0.2   | 0.1   | 0.2   |
| Nlrp4f    | 0.1   | 0.0   | 0.0   | 0.0   | 0.0   | 0.0   | 0.0   | 0.0   | 0.0   | 0.0   | 0.0   | 0.0   |
| Nlrp5     | 0.2   | 0.2   | 0.3   | 0.2   | 0.1   | 0.2   | 0.1   | 0.2   | 0.2   | 0.2   | 0.2   | 0.1   |
| Nlrp5-ps  | 2.0   | 2.5   | 3.4   | 2.3   | 1.8   | 3.2   | 1.9   | 2.2   | 2.2   | 1.6   | 1.8   | 1.9   |
| Nlrp9b    | 0.0   | 0.0   | 0.0   | 0.0   | 0.0   | 0.0   | 0.0   | 0.0   | 0.0   | 0.0   | 0.0   | 0.0   |
| Nlrx1     | 3.6   | 3.4   | 3.6   | 2.9   | 2.9   | 3.8   | 3.3   | 3.1   | 3.3   | 2.8   | 2.6   | 3.1   |
| Nmb       | 0.3   | 1.3   | 1.2   | 0.7   | 1.0   | 1.1   | 0.6   | 0.5   | 1.0   | 0.5   | 0.4   | 0.5   |
| Nmd3      | 18.0  | 17.2  | 15.8  | 17.9  | 16.7  | 16.6  | 16.2  | 17.1  | 16.9  | 18.5  | 21.7  | 17.4  |
| Nme1      | 76.1  | 54.4  | 39.2  | 78.1  | 59.0  | 65.1  | 51.8  | 43.2  | 42.1  | 63.3  | 57.5  | 49.1  |
| Nme2      | 806.0 | 551.8 | 415.8 | 619.6 | 504.6 | 640.6 | 461.8 | 503.9 | 507.0 | 601.7 | 568.5 | 548.3 |
| Nme3      | 4.3   | 3.9   | 3.8   | 4.4   | 4.7   | 6.2   | 2.5   | 3.9   | 4.7   | 7.2   | 4.2   | 4.9   |
| Nme4      | 7.6   | 5.6   | 5.0   | 7.4   | 4.4   | 8.8   | 5.5   | 4.8   | 4.6   | 8.5   | 5.2   | 5.7   |
| Nme5      | 1.6   | 0.8   | 1.1   | 1.3   | 0.8   | 2.5   | 1.0   | 1.2   | 0.4   | 1.5   | 1.1   | 0.5   |
| Nme6      | 5.3   | 3.9   | 3.9   | 5.4   | 4.6   | 5.1   | 5.5   | 4.0   | 5.0   | 3.7   | 4.3   | 4.0   |
| Nme7      | 9.7   | 9.7   | 9.2   | 8.6   | 8.9   | 11.4  | 8.4   | 9.0   | 7.7   | 12.6  | 9.4   | 10.3  |
| Nmi       | 5.4   | 4.3   | 5.4   | 7.8   | 5.5   | 4.1   | 4.4   | 4.4   | 3.3   | 3.6   | 4.9   | 5.5   |
| Nmnat1    | 4.8   | 5.1   | 3.8   | 4.1   | 5.1   | 4.3   | 4.4   | 4.3   | 5.1   | 4.6   | 4.1   | 4.8   |
| Nmnat2    | 1.4   | 1.1   | 1.3   | 1.1   | 1.0   | 0.9   | 1.9   | 2.1   | 1.2   | 1.0   | 1.6   | 1.1   |
| Nmnat3    | 2.4   | 2.1   | 1.6   | 3.2   | 2.0   | 2.6   | 1.5   | 1.6   | 1.0   | 2.5   | 1.8   | 1.7   |
| Nmral1    | 1.7   | 2.3   | 3.7   | 1.5   | 2.5   | 2.6   | 2.8   | 2.9   | 3.0   | 2.1   | 2.9   | 2.7   |
| Nmrk1     | 3.3   | 3.5   | 3.4   | 4.0   | 2.5   | 3.0   | 2.5   | 3.6   | 2.8   | 2.6   | 3.1   | 3.5   |
| Nmt1      | 67.8  | 62.9  | 67.5  | 78.0  | 70.2  | 68.3  | 77.6  | 72.3  | 65.3  | 64.9  | 71.2  | 72.1  |
| Nmt2      | 19.6  | 20.3  | 16.9  | 18.8  | 16.3  | 19.6  | 18.6  | 13.8  | 16.1  | 17.5  | 19.9  | 18.0  |
| Nnat      | 1.1   | 0.7   | 0.6   | 1.2   | 0.7   | 1.1   | 1.1   | 0.6   | 0.8   | 1.3   | 1.6   | 0.9   |
| Nnmt      | 44.1  | 40.4  | 38.1  | 48.7  | 38.8  | 38.6  | 39.8  | 44.5  | 39.0  | 38.6  | 35.7  | 31.2  |
| Nnt       | 10.5  | 8.4   | 7.7   | 10.3  | 10.1  | 8.6   | 9.4   | 9.6   | 9.0   | 10.6  | 12.2  | 10.1  |

Online Table 1

|         |       |       |       |       |       |       |       |       |       |       |       |       |
|---------|-------|-------|-------|-------|-------|-------|-------|-------|-------|-------|-------|-------|
| Noa1    | 3.5   | 3.2   | 3.3   | 3.8   | 3.7   | 2.8   | 3.0   | 3.8   | 3.1   | 3.3   | 2.9   | 3.4   |
| Nob1    | 6.3   | 6.4   | 5.6   | 6.1   | 7.2   | 7.5   | 7.4   | 6.7   | 7.1   | 9.9   | 8.4   | 5.8   |
| Noc2l   | 13.9  | 11.3  | 11.0  | 16.5  | 12.9  | 15.5  | 13.6  | 12.6  | 9.8   | 13.2  | 13.3  | 11.7  |
| Noc3l   | 7.7   | 6.5   | 6.1   | 8.4   | 6.7   | 6.8   | 7.2   | 6.1   | 5.7   | 7.0   | 8.1   | 7.7   |
| Noc4l   | 5.3   | 5.4   | 4.2   | 4.8   | 4.8   | 4.2   | 5.3   | 5.3   | 4.6   | 4.2   | 3.9   | 4.1   |
| Nod1    | 20.8  | 26.1  | 27.8  | 13.5  | 20.7  | 12.3  | 24.4  | 25.2  | 23.1  | 28.3  | 23.7  | 25.6  |
| Nod2    | 0.1   | 0.0   | 0.1   | 0.1   | 0.3   | 0.0   | 0.1   | 0.0   | 0.0   | 0.0   | 0.0   | 0.0   |
| Nodal   | 0.0   | 0.1   | 0.0   | 0.0   | 0.0   | 0.0   | 0.0   | 0.0   | 0.0   | 0.0   | 0.0   | 0.0   |
| Nog     | 1.2   | 0.7   | 0.9   | 0.7   | 0.6   | 0.3   | 0.5   | 0.3   | 0.1   | 0.4   | 0.4   | 0.3   |
| Nol10   | 4.0   | 4.2   | 4.2   | 4.1   | 4.2   | 3.9   | 4.7   | 4.1   | 3.9   | 3.6   | 4.8   | 4.0   |
| Nol11   | 9.3   | 7.8   | 8.0   | 9.4   | 8.7   | 9.2   | 8.4   | 9.0   | 8.1   | 9.2   | 9.2   | 9.1   |
| Nol12   | 6.8   | 7.4   | 5.8   | 7.2   | 5.8   | 5.8   | 6.6   | 7.8   | 6.2   | 7.1   | 8.8   | 7.4   |
| Nol3    | 3.7   | 4.1   | 5.4   | 4.6   | 4.1   | 5.2   | 5.1   | 6.0   | 5.0   | 3.7   | 4.4   | 5.9   |
| Nol4    | 0.0   | 0.0   | 0.0   | 0.0   | 0.0   | 0.0   | 0.0   | 0.0   | 0.0   | 0.0   | 0.0   | 0.0   |
| Nol6    | 7.0   | 6.2   | 5.2   | 7.9   | 7.4   | 6.8   | 6.5   | 6.2   | 5.0   | 6.6   | 5.4   | 4.9   |
| Nol7    | 9.8   | 7.7   | 7.9   | 11.6  | 8.7   | 10.5  | 8.8   | 9.2   | 8.0   | 9.7   | 12.1  | 9.7   |
| Nol8    | 9.8   | 9.3   | 7.7   | 11.4  | 8.3   | 9.8   | 7.8   | 6.9   | 6.9   | 8.7   | 9.5   | 9.1   |
| Nol9    | 6.8   | 7.0   | 7.4   | 6.7   | 7.7   | 6.4   | 8.8   | 9.0   | 7.0   | 6.9   | 7.0   | 8.4   |
| Nolc1   | 15.3  | 11.9  | 13.3  | 18.4  | 14.1  | 13.5  | 14.8  | 14.0  | 10.7  | 12.6  | 14.4  | 13.4  |
| Nom1    | 11.1  | 9.5   | 9.2   | 10.8  | 9.3   | 10.2  | 9.8   | 8.7   | 8.6   | 9.4   | 9.4   | 10.3  |
| Nomo1   | 46.5  | 44.7  | 39.0  | 39.8  | 41.1  | 44.7  | 40.2  | 35.5  | 34.4  | 34.9  | 32.8  | 30.7  |
| Nono    | 69.8  | 67.3  | 80.7  | 85.0  | 66.9  | 72.9  | 86.6  | 85.5  | 72.3  | 80.9  | 91.3  | 86.9  |
| Nop10   | 46.9  | 37.8  | 33.5  | 52.8  | 43.0  | 48.1  | 37.9  | 41.0  | 40.8  | 48.5  | 44.9  | 37.9  |
| Nop14   | 17.1  | 14.9  | 15.0  | 21.1  | 13.9  | 17.1  | 17.9  | 14.7  | 11.7  | 15.1  | 18.8  | 19.1  |
| Nop16   | 12.6  | 9.5   | 9.5   | 12.4  | 10.5  | 11.0  | 10.2  | 9.1   | 9.1   | 12.4  | 11.6  | 10.2  |
| Nop2    | 17.8  | 17.2  | 13.5  | 19.6  | 16.3  | 18.8  | 18.9  | 14.3  | 13.3  | 17.4  | 18.9  | 15.2  |
| Nop56   | 33.4  | 29.9  | 27.0  | 32.5  | 30.3  | 28.6  | 37.9  | 30.5  | 28.1  | 30.4  | 36.3  | 30.0  |
| Nop58   | 29.0  | 25.2  | 22.6  | 27.9  | 28.6  | 19.6  | 29.7  | 25.7  | 25.8  | 31.4  | 35.7  | 28.4  |
| Nop9    | 5.2   | 5.1   | 4.4   | 4.0   | 5.0   | 4.8   | 4.4   | 4.3   | 5.2   | 5.1   | 4.1   | 4.0   |
| Nos1    | 0.0   | 0.1   | 0.0   | 0.0   | 0.0   | 0.0   | 0.0   | 0.0   | 0.0   | 0.0   | 0.0   | 0.0   |
| Nos1ap  | 0.1   | 0.1   | 0.3   | 0.1   | 0.3   | 0.1   | 0.1   | 0.1   | 0.0   | 0.3   | 0.1   | 0.2   |
| Nos2    | 0.1   | 0.0   | 0.1   | 0.0   | 0.0   | 0.0   | 0.0   | 0.2   | 0.2   | 0.0   | 0.0   | 0.0   |
| Nos3    | 0.2   | 0.1   | 0.1   | 0.1   | 0.0   | 0.1   | 0.1   | 0.3   | 0.2   | 0.0   | 0.0   | 0.0   |
| Nosip   | 10.3  | 10.1  | 9.3   | 11.1  | 9.0   | 10.8  | 10.0  | 10.7  | 9.9   | 8.9   | 9.9   | 10.4  |
| Nostrin | 0.5   | 0.1   | 0.1   | 1.9   | 2.6   | 0.3   | 0.2   | 0.1   | 0.2   | 0.3   | 0.1   | 0.2   |
| Notch1  | 0.9   | 1.8   | 2.4   | 0.9   | 1.9   | 1.0   | 2.3   | 2.9   | 2.3   | 1.5   | 1.5   | 1.3   |
| Notch2  | 13.6  | 18.8  | 20.6  | 12.4  | 20.4  | 12.0  | 25.6  | 24.3  | 23.1  | 16.7  | 17.2  | 17.5  |
| Notch3  | 2.9   | 5.9   | 5.8   | 1.9   | 4.0   | 2.7   | 4.1   | 3.4   | 5.3   | 3.2   | 1.9   | 2.8   |
| Notch4  | 1.2   | 0.7   | 0.7   | 2.0   | 2.5   | 1.2   | 2.6   | 1.4   | 1.7   | 1.1   | 0.8   | 0.9   |
| Notum   | 0.0   | 0.1   | 0.1   | 0.0   | 0.0   | 0.1   | 0.0   | 0.0   | 0.0   | 0.1   | 0.0   | 0.0   |
| Nov     | 0.8   | 0.5   | 0.8   | 0.6   | 0.6   | 0.5   | 0.5   | 2.4   | 2.2   | 8.8   | 21.1  | 3.5   |
| Nova1   | 0.0   | 0.1   | 0.1   | 0.0   | 0.1   | 0.0   | 0.1   | 0.1   | 0.0   | 0.1   | 0.1   | 0.1   |
| Nova2   | 0.0   | 0.0   | 0.0   | 0.1   | 0.0   | 0.1   | 0.0   | 0.0   | 0.0   | 0.0   | 0.0   | 0.0   |
| Nox1    | 0.0   | 0.0   | 0.0   | 0.7   | 0.8   | 0.0   | 0.3   | 0.0   | 0.0   | 0.1   | 0.0   | 0.0   |
| Nox4    | 4.5   | 3.1   | 3.6   | 2.8   | 3.0   | 3.3   | 3.6   | 3.4   | 4.0   | 2.8   | 3.3   | 3.8   |
| Noxo1   | 0.5   | 0.6   | 0.5   | 0.5   | 0.6   | 0.8   | 0.6   | 0.7   | 0.7   | 0.4   | 0.4   | 0.5   |
| Noxred1 | 0.3   | 0.2   | 0.3   | 0.7   | 0.2   | 0.2   | 0.0   | 0.3   | 0.3   | 0.3   | 0.2   | 0.2   |
| Npas1   | 0.1   | 0.2   | 0.1   | 0.2   | 0.2   | 0.1   | 0.1   | 0.1   | 0.3   | 0.2   | 0.0   | 0.1   |
| Npas2   | 0.1   | 0.2   | 0.4   | 0.0   | 0.2   | 0.1   | 0.1   | 0.3   | 0.3   | 0.1   | 0.1   | 0.1   |
| Npas3   | 0.9   | 0.8   | 0.8   | 0.9   | 0.7   | 0.6   | 0.8   | 0.8   | 0.6   | 1.4   | 1.1   | 0.9   |
| Npas4   | 0.0   | 0.0   | 0.0   | 0.0   | 0.0   | 0.0   | 0.0   | 0.0   | 0.0   | 0.1   | 0.1   | 0.0   |
| Npat    | 3.9   | 4.8   | 4.7   | 3.7   | 3.9   | 3.9   | 4.1   | 4.3   | 4.2   | 3.9   | 4.9   | 4.5   |
| Npb     | 0.1   | 0.0   | 0.1   | 0.0   | 0.0   | 0.0   | 0.0   | 0.0   | 0.0   | 0.0   | 0.3   | 0.0   |
| Npc1    | 8.5   | 9.8   | 9.7   | 11.2  | 13.4  | 10.7  | 10.2  | 12.1  | 11.1  | 10.2  | 9.0   | 10.4  |
| Npc2    | 157.3 | 123.7 | 111.0 | 168.7 | 133.3 | 171.5 | 111.0 | 102.7 | 111.0 | 163.0 | 136.8 | 143.4 |
| Npcd    | 0.2   | 0.5   | 0.5   | 0.5   | 0.5   | 0.6   | 0.5   | 0.2   | 0.2   | 0.2   | 0.2   | 0.4   |
| Npdc1   | 70.8  | 65.2  | 59.6  | 76.7  | 59.0  | 84.8  | 64.6  | 68.8  | 63.4  | 60.3  | 56.3  | 56.3  |

Online Table 1

|          |       |       |       |       |       |       |       |       |       |       |       |       |
|----------|-------|-------|-------|-------|-------|-------|-------|-------|-------|-------|-------|-------|
| Npepl1   | 14.0  | 13.8  | 13.5  | 12.5  | 13.9  | 13.3  | 14.5  | 14.0  | 15.9  | 15.7  | 14.2  | 13.5  |
| Npepps   | 12.0  | 11.4  | 10.8  | 10.2  | 10.4  | 12.8  | 10.8  | 10.0  | 12.2  | 13.8  | 11.6  | 13.1  |
| Npff     | 0.1   | 0.3   | 0.2   | 0.2   | 0.3   | 0.1   | 0.2   | 0.4   | 0.3   | 0.2   | 0.4   | 0.6   |
| Npffr2   | 0.0   | 0.0   | 0.0   | 0.0   | 0.0   | 0.0   | 0.0   | 0.0   | 0.0   | 0.0   | 0.0   | 0.0   |
| Nphp1    | 9.2   | 8.8   | 10.1  | 9.1   | 6.9   | 9.6   | 8.6   | 9.3   | 7.1   | 7.2   | 8.9   | 8.2   |
| Nphp3    | 1.3   | 1.4   | 1.9   | 1.0   | 0.9   | 1.1   | 1.6   | 1.8   | 1.5   | 2.0   | 1.1   | 1.5   |
| Nphp4    | 0.5   | 0.4   | 0.6   | 0.5   | 0.4   | 0.7   | 0.6   | 0.4   | 0.4   | 0.3   | 0.3   | 0.4   |
| Nphs1    | 0.1   | 0.0   | 0.1   | 0.1   | 0.1   | 0.0   | 0.0   | 0.0   | 0.0   | 0.0   | 0.1   | 0.0   |
| Nphs2    | 0.0   | 0.0   | 0.0   | 0.0   | 0.0   | 0.1   | 0.0   | 0.0   | 0.0   | 0.0   | 0.0   | 0.0   |
| Npl      | 0.2   | 0.3   | 0.5   | 0.4   | 0.5   | 0.6   | 0.4   | 1.2   | 1.0   | 5.3   | 1.9   | 2.6   |
| Nploc4   | 19.4  | 20.2  | 17.7  | 21.6  | 20.4  | 20.5  | 21.1  | 19.7  | 20.3  | 19.5  | 20.0  | 19.0  |
| Npm1     | 498.1 | 335.8 | 340.2 | 476.0 | 332.0 | 410.7 | 353.1 | 333.7 | 276.0 | 416.4 | 472.9 | 435.1 |
| Npm2     | 0.2   | 0.2   | 0.2   | 0.0   | 0.2   | 0.0   | 0.0   | 0.0   | 0.0   | 0.0   | 0.0   | 0.1   |
| Npm3     | 17.7  | 13.9  | 12.2  | 12.3  | 15.6  | 16.7  | 14.2  | 14.2  | 16.2  | 19.2  | 17.1  | 13.6  |
| Npm3-ps1 | 0.5   | 0.2   | 0.4   | 0.6   | 0.5   | 0.4   | 0.8   | 0.5   | 0.5   | 0.4   | 0.5   | 0.5   |
| Npnt     | 2.6   | 1.6   | 2.2   | 0.7   | 1.2   | 1.2   | 2.4   | 1.0   | 1.7   | 3.6   | 3.7   | 2.6   |
| Nppb     | 0.7   | 0.1   | 0.1   | 0.5   | 0.3   | 0.2   | 0.2   | 0.0   | 0.3   | 0.4   | 1.7   | 0.0   |
| Npr1     | 0.1   | 0.1   | 0.2   | 0.0   | 0.0   | 0.0   | 0.0   | 0.1   | 0.1   | 0.6   | 0.2   | 0.2   |
| Npr2     | 19.7  | 17.7  | 16.6  | 16.2  | 13.2  | 20.0  | 14.7  | 11.6  | 12.4  | 10.9  | 12.6  | 12.0  |
| Npr3     | 11.2  | 15.7  | 34.2  | 7.1   | 6.8   | 3.5   | 8.2   | 13.2  | 7.4   | 8.6   | 11.1  | 18.4  |
| Npri2    | 7.8   | 8.7   | 7.2   | 7.4   | 6.4   | 9.0   | 6.5   | 6.4   | 6.4   | 7.6   | 6.1   | 7.1   |
| Npri3    | 8.2   | 7.8   | 6.1   | 7.0   | 7.0   | 7.9   | 6.6   | 7.3   | 6.0   | 5.7   | 6.9   | 5.7   |
| Nps      | 0.0   | 0.0   | 0.0   | 0.0   | 0.0   | 0.1   | 0.0   | 0.1   | 0.0   | 0.0   | 0.0   | 0.0   |
| Npsr1    | 0.1   | 0.0   | 0.0   | 0.1   | 0.1   | 0.1   | 0.1   | 0.0   | 0.0   | 0.0   | 0.0   | 0.0   |
| Nptn     | 103.2 | 104.0 | 103.7 | 120.2 | 118.7 | 100.8 | 129.5 | 118.1 | 130.9 | 126.0 | 150.7 | 143.4 |
| Nptx1    | 0.0   | 0.0   | 0.0   | 0.1   | 0.1   | 0.1   | 0.0   | 0.0   | 0.0   | 0.0   | 0.0   | 0.0   |
| Nptx2    | 0.0   | 0.0   | 0.1   | 0.1   | 0.1   | 0.0   | 0.0   | 0.0   | 0.1   | 0.1   | 0.0   | 0.0   |
| Nptxr    | 0.2   | 0.1   | 0.0   | 0.1   | 0.2   | 0.3   | 0.4   | 0.1   | 0.2   | 0.4   | 0.2   | 0.0   |
| Npy      | 0.4   | 0.0   | 0.1   | 8.1   | 13.5  | 0.0   | 1.6   | 0.2   | 0.2   | 0.9   | 0.3   | 0.7   |
| Npy1r    | 2.6   | 2.1   | 1.6   | 2.0   | 0.7   | 1.0   | 1.2   | 0.7   | 1.1   | 0.3   | 0.5   | 0.6   |
| Npy6r    | 0.0   | 0.0   | 0.0   | 0.1   | 0.0   | 0.0   | 0.0   | 0.0   | 0.0   | 0.0   | 0.0   | 0.0   |
| Nqo1     | 91.6  | 52.5  | 22.8  | 146.5 | 56.5  | 136.0 | 15.2  | 33.9  | 8.3   | 18.8  | 18.0  | 12.7  |
| Nqo2     | 5.7   | 5.7   | 5.6   | 5.9   | 6.3   | 5.8   | 5.0   | 5.3   | 5.6   | 4.9   | 6.5   | 5.7   |
| Nr1d1    | 5.7   | 9.8   | 10.0  | 7.1   | 6.9   | 11.0  | 5.5   | 6.4   | 4.7   | 5.3   | 3.8   | 4.1   |
| Nr1d2    | 17.3  | 21.2  | 24.9  | 19.0  | 18.3  | 21.3  | 18.2  | 21.6  | 18.8  | 20.5  | 20.3  | 23.8  |
| Nr1h2    | 16.7  | 16.7  | 14.1  | 19.1  | 15.9  | 19.2  | 16.7  | 18.0  | 15.9  | 15.9  | 15.2  | 14.1  |
| Nr1h3    | 4.0   | 5.3   | 4.9   | 3.5   | 4.8   | 3.2   | 5.3   | 7.8   | 7.4   | 5.2   | 5.1   | 5.3   |
| Nr1h4    | 2.1   | 2.0   | 1.2   | 2.8   | 1.7   | 3.0   | 2.6   | 2.3   | 1.7   | 1.9   | 1.4   | 2.1   |
| Nr1h5    | 0.0   | 0.0   | 0.0   | 0.0   | 0.0   | 0.0   | 0.0   | 0.0   | 0.0   | 0.0   | 0.0   | 0.0   |
| Nr1i2    | 0.0   | 0.0   | 0.0   | 0.0   | 0.1   | 0.0   | 0.0   | 0.0   | 0.0   | 0.0   | 0.0   | 0.0   |
| Nr2c1    | 2.6   | 2.7   | 2.5   | 2.9   | 2.5   | 2.6   | 3.0   | 3.1   | 2.7   | 2.9   | 2.6   | 3.0   |
| Nr2c2    | 3.0   | 3.0   | 3.1   | 2.8   | 2.6   | 3.1   | 3.2   | 3.4   | 3.5   | 2.8   | 3.4   | 3.3   |
| Nr2c2ap  | 4.2   | 4.6   | 4.1   | 5.5   | 6.3   | 5.6   | 5.9   | 4.5   | 5.1   | 4.5   | 4.5   | 5.5   |
| Nr2f1    | 0.5   | 0.4   | 0.6   | 0.5   | 0.7   | 0.8   | 0.9   | 0.8   | 1.1   | 0.9   | 0.9   | 0.9   |
| Nr2f2    | 1.5   | 2.1   | 2.7   | 1.9   | 1.6   | 2.0   | 1.9   | 1.9   | 2.2   | 2.5   | 2.1   | 2.0   |
| Nr2f6    | 16.0  | 14.5  | 12.2  | 11.9  | 15.0  | 12.8  | 16.5  | 15.2  | 19.1  | 19.9  | 13.3  | 15.6  |
| Nr3c1    | 22.8  | 25.9  | 26.9  | 23.6  | 22.2  | 26.6  | 20.4  | 23.7  | 22.2  | 22.1  | 23.2  | 25.9  |
| Nr3c2    | 0.9   | 0.9   | 1.0   | 0.8   | 0.5   | 1.2   | 0.5   | 0.7   | 0.3   | 0.4   | 0.3   | 0.6   |
| Nr4a1    | 0.7   | 0.7   | 0.6   | 0.4   | 0.6   | 0.7   | 0.5   | 0.3   | 0.7   | 2.8   | 0.8   | 0.5   |
| Nr4a2    | 0.4   | 0.5   | 0.3   | 0.8   | 0.2   | 0.7   | 0.2   | 0.4   | 0.2   | 0.2   | 0.2   | 0.3   |
| Nr4a3    | 0.0   | 0.0   | 0.0   | 0.0   | 0.1   | 0.0   | 0.0   | 0.0   | 0.0   | 0.3   | 0.1   | 0.0   |
| Nr5a2    | 0.0   | 0.0   | 0.1   | 0.0   | 0.0   | 0.0   | 0.1   | 0.0   | 0.0   | 0.0   | 0.0   | 0.0   |
| Nr6a1    | 0.6   | 0.8   | 0.8   | 0.5   | 0.7   | 0.8   | 0.7   | 0.7   | 0.6   | 0.7   | 1.0   | 0.8   |
| Nradd    | 13.1  | 13.4  | 7.8   | 11.6  | 8.8   | 16.9  | 7.9   | 7.8   | 9.8   | 18.7  | 10.4  | 10.5  |
| Nrap     | 0.0   | 0.0   | 0.0   | 0.0   | 0.0   | 0.0   | 0.0   | 0.0   | 0.0   | 0.0   | 0.0   | 0.0   |
| Nrap     | 0.0   | 0.1   | 0.0   | 0.0   | 0.0   | 0.0   | 0.1   | 0.2   | 0.1   | 0.0   | 0.0   | 0.0   |
| Nras     | 20.5  | 19.0  | 15.4  | 21.6  | 19.1  | 18.2  | 17.0  | 19.4  | 17.6  | 16.6  | 20.6  | 16.6  |

Online Table 1



|         |      |      |      |      |      |      |      |      |      |      |      |      |
|---------|------|------|------|------|------|------|------|------|------|------|------|------|
| Nrbf2   | 10.0 | 11.3 | 11.5 | 8.6  | 10.1 | 8.7  | 10.3 | 10.8 | 9.8  | 11.3 | 11.9 | 12.8 |
| Nrbp1   | 38.1 | 35.8 | 35.2 | 40.0 | 34.4 | 37.8 | 37.3 | 38.9 | 37.6 | 41.1 | 40.8 | 40.6 |
| Nrbp2   | 3.2  | 4.2  | 4.4  | 2.5  | 2.2  | 3.4  | 2.9  | 5.5  | 5.3  | 4.4  | 4.5  | 4.0  |
| Nrcam   | 0.3  | 0.2  | 0.2  | 0.4  | 0.3  | 0.3  | 0.2  | 0.1  | 0.1  | 0.2  | 0.2  | 0.1  |
| Nrd1    | 40.1 | 33.2 | 32.3 | 39.4 | 35.4 | 37.1 | 33.9 | 31.1 | 27.3 | 29.3 | 33.9 | 34.7 |
| Nrde2   | 3.0  | 2.6  | 3.0  | 2.8  | 2.7  | 2.7  | 2.7  | 3.6  | 3.0  | 3.2  | 3.6  | 2.7  |
| Nrep    | 0.5  | 0.1  | 0.3  | 0.7  | 0.4  | 0.3  | 0.4  | 1.3  | 1.4  | 1.2  | 0.7  | 0.7  |
| Nrf1    | 4.2  | 4.9  | 4.9  | 4.5  | 4.8  | 4.9  | 5.1  | 5.3  | 5.3  | 5.2  | 4.4  | 5.0  |
| Nrg1    | 2.8  | 1.2  | 1.1  | 2.2  | 1.5  | 1.8  | 1.0  | 0.6  | 0.5  | 1.1  | 1.6  | 1.1  |
| Nrg2    | 0.1  | 0.0  | 0.0  | 0.0  | 0.0  | 0.1  | 0.0  | 0.0  | 0.0  | 0.0  | 0.0  | 0.1  |
| Nrg3    | 0.0  | 0.0  | 0.0  | 0.0  | 0.0  | 0.0  | 0.0  | 0.0  | 0.0  | 0.0  | 0.0  | 0.0  |
| Nrg4    | 0.6  | 0.8  | 0.4  | 0.4  | 0.4  | 0.4  | 0.4  | 0.4  | 0.7  | 0.6  | 0.4  | 0.7  |
| Nrip1   | 4.1  | 4.8  | 6.5  | 3.3  | 4.1  | 3.4  | 4.8  | 5.6  | 5.0  | 4.0  | 4.2  | 4.5  |
| Nrip2   | 0.5  | 0.3  | 0.3  | 1.0  | 0.1  | 1.2  | 0.2  | 0.3  | 0.2  | 0.5  | 0.5  | 0.2  |
| Nrip3   | 0.2  | 0.3  | 0.2  | 0.3  | 0.2  | 0.1  | 0.2  | 0.2  | 0.2  | 0.1  | 0.1  | 0.1  |
| Nrk     | 0.1  | 0.0  | 0.1  | 0.0  | 0.0  | 0.0  | 0.0  | 0.0  | 0.0  | 0.0  | 0.0  | 0.0  |
| Nrm     | 2.9  | 2.7  | 3.4  | 2.2  | 2.7  | 2.8  | 3.3  | 3.4  | 3.9  | 2.6  | 2.6  | 2.2  |
| Nrn1    | 0.9  | 0.3  | 0.3  | 0.1  | 0.3  | 1.0  | 0.3  | 0.2  | 0.4  | 0.3  | 0.2  | 0.4  |
| Nrn1l   | 0.5  | 0.7  | 0.0  | 0.4  | 0.3  | 0.3  | 0.2  | 0.1  | 0.4  | 0.3  | 0.2  | 0.1  |
| Nron    | 0.0  | 0.1  | 0.1  | 0.0  | 0.0  | 0.0  | 0.1  | 0.1  | 0.0  | 0.1  | 0.0  | 0.1  |
| Nrp     | 0.9  | 0.7  | 0.4  | 0.4  | 0.7  | 0.7  | 1.4  | 1.2  | 0.9  | 0.7  | 1.5  | 0.9  |
| Nrp1    | 10.0 | 12.5 | 24.0 | 16.9 | 30.4 | 6.3  | 12.8 | 20.6 | 17.9 | 21.0 | 16.1 | 20.1 |
| Nrp2    | 8.9  | 6.6  | 8.6  | 22.8 | 22.1 | 22.0 | 13.9 | 10.7 | 9.2  | 10.1 | 9.8  | 9.5  |
| Nrsn2   | 0.0  | 0.0  | 0.0  | 0.0  | 0.0  | 0.0  | 0.0  | 0.0  | 0.0  | 0.0  | 0.0  | 0.0  |
| Nrtn    | 0.0  | 0.1  | 0.1  | 0.1  | 0.0  | 0.0  | 0.0  | 0.1  | 0.1  | 0.3  | 0.1  | 0.1  |
| Nrxn1   | 0.0  | 0.0  | 0.1  | 0.0  | 0.0  | 0.0  | 0.0  | 0.0  | 0.0  | 0.0  | 0.0  | 0.0  |
| Nrxn2   | 0.2  | 0.2  | 0.4  | 0.3  | 0.2  | 0.4  | 0.2  | 0.3  | 0.1  | 0.1  | 0.1  | 0.1  |
| Nrxn3   | 0.0  | 0.0  | 0.0  | 0.0  | 0.0  | 0.0  | 0.0  | 0.0  | 0.0  | 0.0  | 0.0  | 0.0  |
| Nsa2    | 50.7 | 41.2 | 52.2 | 45.6 | 41.3 | 45.7 | 45.7 | 55.9 | 41.5 | 49.5 | 56.1 | 61.2 |
| Nsd1    | 10.6 | 11.6 | 11.4 | 9.9  | 10.0 | 10.2 | 9.3  | 10.8 | 9.8  | 8.3  | 9.8  | 9.9  |
| Nsdhl   | 12.2 | 14.4 | 14.9 | 4.1  | 7.8  | 8.9  | 23.0 | 27.8 | 21.1 | 6.9  | 21.5 | 9.8  |
| Nsf     | 13.6 | 12.2 | 11.4 | 14.2 | 15.4 | 11.4 | 13.2 | 12.4 | 11.8 | 12.0 | 13.1 | 12.4 |
| Nsfl1c  | 50.2 | 46.1 | 46.7 | 59.4 | 43.2 | 56.3 | 50.5 | 54.6 | 45.2 | 47.6 | 48.2 | 49.3 |
| Nsg1    | 10.3 | 10.1 | 11.6 | 11.7 | 12.7 | 9.7  | 13.7 | 12.4 | 10.7 | 8.1  | 9.4  | 7.8  |
| Nsl1    | 0.9  | 1.3  | 2.0  | 0.5  | 2.0  | 0.4  | 2.5  | 0.8  | 1.5  | 0.9  | 1.5  | 1.1  |
| Nsmaf   | 15.2 | 14.8 | 12.8 | 14.6 | 12.0 | 17.2 | 12.2 | 10.6 | 12.5 | 16.5 | 14.1 | 14.6 |
| Nsmce1  | 21.4 | 20.8 | 20.3 | 18.0 | 16.9 | 19.4 | 18.6 | 17.5 | 18.9 | 19.9 | 20.2 | 21.6 |
| Nsmce2  | 20.1 | 19.7 | 20.1 | 20.8 | 19.4 | 18.7 | 18.2 | 20.3 | 17.0 | 18.3 | 23.7 | 21.1 |
| Nsmce4a | 14.4 | 15.2 | 17.1 | 12.1 | 13.6 | 14.3 | 15.3 | 15.7 | 16.5 | 16.2 | 16.6 | 16.6 |
| Nsmf    | 8.6  | 8.8  | 9.1  | 7.7  | 7.6  | 9.5  | 9.6  | 8.4  | 9.5  | 7.9  | 7.9  | 8.5  |
| Nsun2   | 21.6 | 17.7 | 15.7 | 24.2 | 19.5 | 22.1 | 20.9 | 19.4 | 17.3 | 18.6 | 20.8 | 19.0 |
| Nsun3   | 2.2  | 2.3  | 2.4  | 3.1  | 2.4  | 2.1  | 1.7  | 2.2  | 2.3  | 1.8  | 1.8  | 2.2  |
| Nsun4   | 5.2  | 4.6  | 3.5  | 4.6  | 4.0  | 3.7  | 4.6  | 5.0  | 5.0  | 3.7  | 4.1  | 3.9  |
| Nsun5   | 1.6  | 1.9  | 1.5  | 1.9  | 1.8  | 1.9  | 1.7  | 1.8  | 1.9  | 2.0  | 1.9  | 1.5  |
| Nsun6   | 2.4  | 3.0  | 2.8  | 2.3  | 2.3  | 1.9  | 2.4  | 2.5  | 2.7  | 2.4  | 2.6  | 2.8  |
| Nsun7   | 0.4  | 0.5  | 0.3  | 0.5  | 0.5  | 0.7  | 0.3  | 0.4  | 0.3  | 0.4  | 0.2  | 0.5  |
| Nt5c    | 35.0 | 32.4 | 35.3 | 39.1 | 30.5 | 35.0 | 39.4 | 43.8 | 32.4 | 44.3 | 41.0 | 37.1 |
| Nt5c1b  | 0.0  | 0.2  | 0.0  | 0.1  | 0.0  | 0.0  | 0.0  | 0.1  | 0.0  | 0.1  | 0.1  | 0.0  |
| Nt5c2   | 5.9  | 5.1  | 4.5  | 6.4  | 6.1  | 4.8  | 5.0  | 4.5  | 4.5  | 4.9  | 4.9  | 4.9  |
| Nt5c3   | 8.2  | 8.7  | 7.8  | 8.5  | 7.6  | 8.9  | 7.1  | 6.8  | 7.6  | 10.1 | 8.9  | 7.7  |
| Nt5c3l  | 14.3 | 13.8 | 14.1 | 15.6 | 12.3 | 14.9 | 15.7 | 16.7 | 12.2 | 12.4 | 17.5 | 13.3 |
| Nt5dc1  | 4.4  | 4.9  | 3.9  | 5.4  | 5.0  | 4.1  | 4.4  | 4.2  | 4.4  | 4.6  | 5.3  | 5.0  |
| Nt5dc2  | 4.7  | 6.7  | 7.6  | 6.2  | 8.6  | 5.5  | 6.9  | 8.6  | 7.7  | 7.1  | 6.9  | 6.7  |
| Nt5dc3  | 2.5  | 2.3  | 2.1  | 2.4  | 2.6  | 2.5  | 2.4  | 2.1  | 1.8  | 2.1  | 2.6  | 2.3  |
| Nt5e    | 2.3  | 1.3  | 2.0  | 1.7  | 2.4  | 0.7  | 1.5  | 2.4  | 1.9  | 2.0  | 2.1  | 2.6  |
| Nt5m    | 9.1  | 8.0  | 6.4  | 8.1  | 7.7  | 7.2  | 9.4  | 6.5  | 8.2  | 8.3  | 8.2  | 9.1  |
| Ntan1   | 25.8 | 22.9 | 21.9 | 32.0 | 21.6 | 33.1 | 22.3 | 25.8 | 25.0 | 21.2 | 23.5 | 21.0 |

Online Table 1

|          |      |      |       |       |      |       |      |       |      |      |      |      |
|----------|------|------|-------|-------|------|-------|------|-------|------|------|------|------|
| Ntf5     | 0.8  | 1.3  | 1.3   | 0.8   | 0.7  | 0.8   | 0.9  | 1.1   | 0.9  | 1.7  | 1.4  | 1.2  |
| Nthl1    | 4.0  | 3.7  | 3.0   | 5.0   | 3.1  | 6.3   | 2.8  | 2.7   | 3.4  | 4.3  | 3.9  | 3.5  |
| Ntm      | 0.2  | 0.1  | 0.0   | 0.0   | 0.0  | 0.1   | 0.0  | 0.0   | 0.0  | 0.0  | 0.1  | 0.0  |
| Ntmt1    | 14.5 | 11.3 | 9.0   | 12.3  | 10.2 | 12.8  | 11.1 | 11.7  | 13.3 | 13.6 | 13.4 | 9.4  |
| Ntn1     | 5.0  | 5.3  | 6.0   | 4.2   | 5.4  | 4.7   | 3.9  | 2.4   | 2.6  | 2.1  | 1.8  | 2.3  |
| Ntn3     | 0.4  | 0.5  | 0.5   | 0.5   | 0.4  | 0.8   | 0.4  | 0.4   | 0.5  | 0.4  | 0.3  | 0.4  |
| Ntn4     | 25.1 | 19.4 | 13.6  | 23.5  | 14.1 | 22.5  | 17.7 | 10.8  | 11.6 | 12.4 | 14.8 | 15.7 |
| Nting1   | 0.0  | 0.0  | 0.0   | 0.0   | 0.1  | 0.0   | 0.0  | 0.0   | 0.0  | 0.0  | 0.0  | 0.0  |
| Nting2   | 1.3  | 1.5  | 1.6   | 1.9   | 1.7  | 1.9   | 1.8  | 1.2   | 1.5  | 1.2  | 1.3  | 1.5  |
| Ntpcr    | 11.9 | 9.8  | 9.4   | 10.6  | 9.6  | 9.1   | 8.9  | 10.7  | 9.5  | 11.6 | 9.9  | 9.4  |
| Ntrk1    | 0.4  | 0.4  | 0.7   | 0.4   | 0.5  | 0.8   | 0.2  | 0.4   | 0.3  | 0.1  | 0.1  | 0.3  |
| Ntrk2    | 0.0  | 0.0  | 0.0   | 0.0   | 0.0  | 0.0   | 0.0  | 0.0   | 0.0  | 0.0  | 0.0  | 0.0  |
| Ntrk3    | 0.1  | 0.0  | 0.0   | 0.0   | 0.0  | 0.0   | 0.0  | 0.0   | 0.0  | 0.0  | 0.1  | 0.1  |
| Nuak1    | 13.0 | 14.1 | 14.8  | 17.5  | 16.4 | 12.5  | 23.3 | 13.7  | 20.3 | 20.2 | 20.5 | 22.1 |
| Nuak2    | 6.2  | 6.2  | 4.8   | 6.5   | 9.3  | 8.6   | 9.5  | 7.3   | 9.1  | 7.0  | 7.6  | 5.8  |
| Nub1     | 26.5 | 22.3 | 20.6  | 28.6  | 20.4 | 27.8  | 21.5 | 21.9  | 20.1 | 23.7 | 25.3 | 26.0 |
| Nubp1    | 9.2  | 7.4  | 6.7   | 8.3   | 7.3  | 7.1   | 8.3  | 7.2   | 8.1  | 8.4  | 7.0  | 7.8  |
| Nubp2    | 13.7 | 11.4 | 11.0  | 15.9  | 14.4 | 13.2  | 13.6 | 11.9  | 11.6 | 12.5 | 12.0 | 11.5 |
| Nubpl    | 8.3  | 6.5  | 6.4   | 4.5   | 6.5  | 7.1   | 5.1  | 5.5   | 4.8  | 4.5  | 5.8  | 4.8  |
| Nucb1    | 93.0 | 94.5 | 116.3 | 100.7 | 84.5 | 107.0 | 96.7 | 117.9 | 84.8 | 83.1 | 88.8 | 87.3 |
| Nucb2    | 76.4 | 52.8 | 65.0  | 96.1  | 52.5 | 72.5  | 68.0 | 63.5  | 43.6 | 49.3 | 67.6 | 77.5 |
| Nucks1   | 19.3 | 20.8 | 25.6  | 20.2  | 21.2 | 18.4  | 21.6 | 23.1  | 21.5 | 20.2 | 23.4 | 23.2 |
| Nudc     | 60.0 | 63.9 | 72.1  | 72.9  | 57.2 | 64.2  | 72.3 | 60.9  | 51.4 | 57.1 | 70.1 | 64.5 |
| Nudcd1   | 11.0 | 10.2 | 9.2   | 11.0  | 10.5 | 10.7  | 9.3  | 8.8   | 8.1  | 12.1 | 12.6 | 11.0 |
| Nudcd2   | 22.6 | 22.6 | 21.4  | 25.6  | 23.8 | 22.9  | 22.3 | 20.5  | 20.9 | 25.4 | 26.1 | 24.1 |
| Nudcd3   | 10.4 | 11.1 | 10.1  | 10.6  | 9.8  | 10.9  | 11.9 | 10.0  | 11.8 | 10.8 | 10.0 | 11.1 |
| Nudt1    | 4.6  | 5.6  | 4.9   | 4.2   | 4.7  | 4.1   | 5.8  | 5.8   | 5.1  | 4.5  | 3.9  | 4.6  |
| Nudt10   | 0.4  | 0.1  | 0.1   | 0.1   | 0.1  | 0.2   | 0.1  | 0.1   | 0.1  | 0.2  | 0.2  | 0.1  |
| Nudt11   | 0.2  | 0.2  | 0.1   | 0.5   | 0.1  | 0.3   | 0.1  | 0.1   | 0.1  | 0.3  | 0.1  | 0.1  |
| Nudt12   | 3.2  | 3.4  | 3.0   | 3.0   | 2.1  | 4.3   | 2.5  | 2.5   | 2.3  | 3.3  | 3.3  | 2.7  |
| Nudt13   | 1.9  | 2.0  | 2.1   | 2.5   | 1.9  | 2.0   | 1.3  | 1.2   | 1.6  | 1.4  | 1.2  | 1.4  |
| Nudt14   | 6.0  | 6.3  | 5.0   | 4.2   | 6.4  | 5.6   | 5.7  | 6.8   | 5.7  | 7.0  | 5.7  | 5.4  |
| Nudt15   | 1.1  | 1.0  | 0.6   | 0.7   | 1.3  | 0.8   | 0.8  | 0.8   | 0.9  | 1.2  | 1.2  | 0.9  |
| Nudt16   | 5.7  | 6.2  | 4.9   | 5.4   | 4.5  | 7.0   | 5.4  | 5.0   | 6.0  | 5.4  | 5.6  | 5.9  |
| Nudt16l1 | 10.0 | 10.5 | 9.0   | 8.9   | 9.8  | 13.0  | 8.2  | 9.4   | 9.5  | 11.1 | 8.5  | 9.2  |
| Nudt17   | 1.1  | 1.4  | 1.1   | 0.7   | 0.8  | 1.7   | 0.8  | 0.5   | 0.9  | 1.5  | 1.2  | 1.3  |
| Nudt18   | 3.0  | 2.9  | 2.4   | 2.5   | 2.8  | 3.9   | 2.5  | 2.7   | 2.4  | 2.7  | 2.4  | 2.3  |
| Nudt19   | 17.6 | 13.8 | 12.0  | 15.1  | 12.4 | 13.8  | 11.0 | 11.2  | 11.2 | 12.9 | 11.7 | 11.5 |
| Nudt2    | 18.1 | 14.2 | 16.9  | 19.0  | 14.8 | 21.0  | 19.2 | 15.8  | 14.7 | 15.0 | 21.2 | 17.0 |
| Nudt21   | 26.3 | 25.1 | 23.9  | 20.4  | 24.2 | 20.3  | 24.3 | 25.6  | 26.2 | 27.2 | 26.3 | 23.4 |
| Nudt22   | 8.4  | 12.0 | 8.2   | 8.3   | 6.4  | 8.9   | 7.3  | 7.3   | 8.0  | 7.3  | 7.2  | 7.0  |
| Nudt3    | 43.9 | 34.4 | 32.3  | 60.7  | 39.1 | 52.8  | 42.0 | 31.5  | 35.5 | 40.0 | 42.3 | 39.7 |
| Nudt4    | 19.5 | 22.3 | 25.5  | 18.6  | 22.2 | 17.7  | 23.9 | 25.2  | 23.1 | 30.5 | 31.1 | 31.9 |
| Nudt5    | 19.7 | 19.2 | 15.3  | 17.9  | 18.6 | 20.5  | 16.2 | 13.2  | 15.8 | 19.1 | 16.8 | 15.0 |
| Nudt6    | 9.0  | 8.0  | 9.8   | 6.5   | 6.8  | 6.0   | 9.5  | 7.0   | 8.4  | 17.1 | 12.4 | 13.0 |
| Nudt7    | 9.2  | 8.1  | 6.1   | 6.3   | 7.2  | 7.5   | 5.6  | 6.8   | 7.3  | 8.2  | 6.7  | 7.1  |
| Nudt8    | 16.4 | 16.8 | 12.7  | 16.3  | 12.5 | 19.7  | 14.3 | 13.3  | 14.2 | 15.5 | 13.1 | 16.4 |
| Nudt9    | 23.4 | 22.8 | 25.8  | 30.6  | 20.9 | 29.1  | 27.7 | 22.6  | 19.9 | 20.4 | 24.5 | 27.4 |
| Nuf2     | 2.3  | 3.9  | 7.4   | 0.5   | 6.2  | 0.7   | 8.4  | 2.9   | 6.3  | 3.2  | 6.1  | 3.6  |
| Nufip1   | 2.9  | 2.5  | 2.5   | 3.5   | 3.0  | 2.7   | 2.5  | 3.1   | 2.6  | 3.0  | 3.0  | 3.1  |
| Nufip2   | 11.3 | 13.3 | 15.4  | 12.2  | 12.5 | 11.6  | 13.1 | 15.0  | 12.7 | 12.1 | 15.6 | 14.6 |
| Nuggc    | 0.3  | 0.4  | 0.2   | 0.4   | 0.2  | 0.1   | 0.2  | 0.3   | 0.1  | 0.1  | 0.3  | 0.3  |
| Numa1    | 20.3 | 21.0 | 22.3  | 22.1  | 21.7 | 21.6  | 25.9 | 23.6  | 23.1 | 20.2 | 20.0 | 21.1 |
| Numb     | 10.0 | 12.6 | 12.0  | 12.5  | 10.6 | 9.7   | 12.3 | 10.6  | 11.1 | 10.6 | 12.0 | 11.6 |
| Numbl    | 23.0 | 26.5 | 22.2  | 23.0  | 19.2 | 23.6  | 26.4 | 29.8  | 28.6 | 21.6 | 23.4 | 20.2 |
| Nup107   | 8.1  | 10.0 | 9.4   | 7.4   | 10.1 | 6.5   | 10.4 | 9.8   | 9.2  | 8.1  | 10.8 | 8.1  |
| Nup133   | 3.9  | 4.1  | 3.9   | 3.7   | 4.1  | 3.8   | 3.9  | 4.1   | 4.1  | 3.1  | 3.7  | 3.7  |

Online Table 1

|             |       |      |      |       |      |       |       |      |      |       |       |       |
|-------------|-------|------|------|-------|------|-------|-------|------|------|-------|-------|-------|
| Nup153      | 13.3  | 12.5 | 11.0 | 13.6  | 11.9 | 11.6  | 12.2  | 10.9 | 10.7 | 11.5  | 12.6  | 10.9  |
| Nup155      | 4.7   | 5.5  | 5.5  | 4.1   | 5.9  | 4.7   | 5.4   | 5.1  | 4.9  | 4.6   | 5.2   | 4.2   |
| Nup160      | 2.9   | 3.5  | 3.8  | 3.5   | 4.0  | 3.3   | 3.5   | 3.3  | 3.1  | 3.3   | 3.5   | 3.2   |
| Nup188      | 5.0   | 6.0  | 5.7  | 4.2   | 5.8  | 4.4   | 5.8   | 7.0  | 6.3  | 5.7   | 5.7   | 4.5   |
| Nup205      | 14.1  | 12.8 | 11.8 | 12.2  | 14.1 | 12.9  | 13.1  | 11.5 | 11.1 | 11.6  | 13.0  | 11.3  |
| Nup210      | 0.1   | 0.0  | 0.0  | 0.0   | 0.1  | 0.1   | 0.0   | 0.1  | 0.0  | 0.1   | 0.0   | 0.0   |
| Nup210l     | 0.2   | 0.3  | 0.3  | 0.2   | 0.2  | 0.3   | 0.2   | 0.3  | 0.3  | 0.4   | 0.3   | 0.3   |
| Nup214      | 2.9   | 3.7  | 3.9  | 3.7   | 4.1  | 3.1   | 3.8   | 3.9  | 3.1  | 2.9   | 2.6   | 2.5   |
| Nup35       | 12.8  | 11.9 | 9.8  | 11.2  | 11.2 | 7.4   | 11.5  | 8.5  | 11.2 | 11.7  | 12.7  | 9.7   |
| Nup37       | 8.1   | 8.4  | 8.6  | 4.7   | 8.2  | 5.4   | 7.2   | 7.1  | 7.7  | 8.5   | 7.7   | 7.3   |
| Nup43       | 4.8   | 6.2  | 6.4  | 5.0   | 6.0  | 5.4   | 6.4   | 5.4  | 5.8  | 5.3   | 5.9   | 5.3   |
| Nup50       | 10.5  | 10.1 | 11.4 | 11.2  | 9.8  | 10.8  | 10.5  | 10.3 | 9.7  | 11.3  | 11.0  | 10.7  |
| Nup54       | 8.2   | 7.9  | 8.5  | 7.8   | 8.4  | 8.6   | 9.3   | 8.8  | 8.9  | 8.5   | 10.6  | 8.7   |
| Nup62       | 7.3   | 7.2  | 5.9  | 7.7   | 7.2  | 7.8   | 8.5   | 7.4  | 7.2  | 6.8   | 8.1   | 6.3   |
| Nup62cl     | 0.2   | 0.2  | 0.1  | 0.2   | 0.2  | 0.1   | 0.1   | 0.1  | 0.2  | 0.2   | 0.2   | 0.1   |
| Nup62-il4i1 | 0.3   | 0.3  | 0.2  | 0.4   | 0.3  | 0.4   | 0.4   | 0.4  | 0.3  | 0.3   | 0.2   | 0.3   |
| Nup85       | 9.9   | 12.1 | 13.4 | 9.5   | 12.3 | 9.6   | 13.7  | 11.6 | 12.5 | 10.5  | 11.0  | 9.9   |
| Nup88       | 30.2  | 27.9 | 25.3 | 30.3  | 26.5 | 30.9  | 27.7  | 25.9 | 27.2 | 26.5  | 29.3  | 27.9  |
| Nup93       | 8.7   | 9.8  | 10.5 | 8.6   | 11.1 | 7.9   | 11.4  | 11.6 | 10.8 | 9.9   | 10.5  | 9.8   |
| Nup98       | 18.4  | 18.3 | 19.4 | 18.4  | 18.7 | 16.2  | 20.6  | 19.6 | 18.1 | 18.5  | 19.0  | 19.6  |
| Nupl1       | 15.8  | 15.7 | 15.1 | 16.3  | 14.9 | 13.7  | 16.7  | 14.7 | 15.7 | 15.9  | 17.5  | 14.8  |
| Nupl2       | 4.3   | 3.9  | 3.8  | 4.8   | 4.2  | 3.7   | 4.0   | 4.1  | 3.5  | 4.1   | 4.3   | 3.8   |
| Nupr1       | 207.6 | 62.4 | 46.4 | 291.4 | 78.0 | 200.1 | 109.9 | 76.7 | 78.1 | 114.8 | 154.8 | 122.2 |
| Nupr1l      | 0.9   | 1.0  | 0.9  | 0.1   | 0.4  | 1.2   | 0.1   | 0.7  | 0.6  | 0.9   | 0.5   | 0.4   |
| Nus1        | 20.8  | 19.1 | 15.1 | 22.3  | 21.9 | 20.9  | 20.5  | 15.4 | 20.2 | 24.2  | 23.3  | 22.0  |
| Nusap1      | 2.5   | 4.3  | 8.2  | 0.8   | 5.8  | 1.1   | 8.4   | 2.9  | 5.6  | 2.9   | 5.6   | 3.8   |
| Nutf2       | 5.2   | 5.1  | 4.7  | 8.0   | 4.7  | 4.9   | 3.9   | 4.8  | 4.8  | 5.4   | 5.8   | 4.4   |
| Nutf2-ps1   | 51.6  | 43.5 | 45.6 | 64.8  | 50.5 | 56.5  | 61.5  | 57.0 | 49.7 | 50.3  | 56.3  | 53.1  |
| Nvl         | 9.9   | 10.8 | 10.9 | 10.7  | 10.5 | 10.7  | 11.4  | 10.2 | 10.5 | 10.1  | 11.7  | 10.1  |
| Nwd1        | 0.0   | 0.0  | 0.0  | 0.0   | 0.0  | 0.1   | 0.0   | 0.1  | 0.0  | 0.0   | 0.1   | 0.0   |
| Nxf1        | 18.6  | 19.9 | 19.0 | 17.0  | 18.2 | 16.8  | 18.7  | 18.0 | 20.0 | 17.9  | 20.5  | 18.7  |
| Nxf2        | 0.2   | 0.1  | 0.4  | 0.5   | 0.1  | 0.3   | 0.2   | 0.1  | 0.2  | 0.2   | 0.1   | 0.1   |
| Nxf3        | 0.2   | 0.1  | 0.0  | 0.1   | 0.0  | 0.0   | 0.0   | 0.1  | 0.0  | 0.1   | 0.0   | 0.0   |
| Nxf7        | 0.1   | 0.0  | 0.0  | 0.0   | 0.0  | 0.0   | 0.0   | 0.0  | 0.0  | 0.0   | 0.0   | 0.0   |
| Nxn         | 29.5  | 29.3 | 32.5 | 18.0  | 27.0 | 23.1  | 27.6  | 31.7 | 30.7 | 61.4  | 42.7  | 44.4  |
| Nxnl1       | 0.0   | 0.0  | 0.0  | 0.0   | 0.0  | 0.0   | 0.0   | 0.0  | 0.0  | 0.0   | 0.0   | 0.0   |
| Nxnl2       | 0.6   | 0.6  | 0.7  | 0.1   | 0.4  | 0.3   | 0.6   | 0.6  | 0.9  | 2.1   | 2.1   | 1.0   |
| Nxpe2       | 0.0   | 0.0  | 0.0  | 0.0   | 0.1  | 0.0   | 0.0   | 0.0  | 0.0  | 0.0   | 0.0   | 0.0   |
| Nxpe3       | 0.4   | 0.6  | 0.5  | 0.4   | 0.4  | 0.5   | 0.3   | 0.4  | 0.5  | 0.3   | 0.5   | 0.5   |
| Nxpe4       | 3.2   | 3.5  | 3.8  | 2.7   | 2.6  | 3.4   | 2.4   | 3.6  | 2.5  | 1.8   | 2.8   | 2.8   |
| Nxpe5       | 0.3   | 0.0  | 0.0  | 1.1   | 1.9  | 0.1   | 0.0   | 0.0  | 0.0  | 0.1   | 0.0   | 0.0   |
| Nxph1       | 0.0   | 0.0  | 0.0  | 0.0   | 0.0  | 0.0   | 0.0   | 0.0  | 0.0  | 0.1   | 0.0   | 0.0   |
| Nxph3       | 0.1   | 0.1  | 0.1  | 0.0   | 0.1  | 0.0   | 0.1   | 0.1  | 0.2  | 0.5   | 0.3   | 0.1   |
| Nxph4       | 0.3   | 0.2  | 0.4  | 0.1   | 0.4  | 0.6   | 0.5   | 0.4  | 0.4  | 0.4   | 0.3   | 0.6   |
| Nxt1        | 8.0   | 8.2  | 9.4  | 8.2   | 10.1 | 7.4   | 10.2  | 8.6  | 9.9  | 8.0   | 9.2   | 8.6   |
| Nxt2        | 7.3   | 8.2  | 9.7  | 9.9   | 8.1  | 9.0   | 8.6   | 7.5  | 8.1  | 7.2   | 9.5   | 9.3   |
| Nyap1       | 2.0   | 2.3  | 2.2  | 1.4   | 1.0  | 2.3   | 1.2   | 1.2  | 1.2  | 1.2   | 1.3   | 1.3   |
| Nyap2       | 0.0   | 0.0  | 0.0  | 0.0   | 0.0  | 0.0   | 0.0   | 0.0  | 0.0  | 0.0   | 0.0   | 0.0   |
| Nynrin      | 2.9   | 4.2  | 4.9  | 3.1   | 2.7  | 4.1   | 4.1   | 4.4  | 4.5  | 4.2   | 3.6   | 3.8   |
| Nyx         | 0.2   | 0.2  | 0.3  | 0.1   | 0.2  | 0.1   | 0.2   | 0.2  | 0.1  | 0.1   | 0.0   | 0.1   |
| Oacyl       | 0.1   | 0.1  | 0.0  | 0.2   | 0.3  | 0.0   | 0.2   | 0.1  | 0.2  | 0.2   | 0.1   | 0.2   |
| Oaf         | 23.4  | 20.9 | 17.5 | 27.6  | 27.1 | 36.2  | 32.3  | 24.1 | 35.2 | 26.8  | 27.9  | 24.6  |
| Oard1       | 9.4   | 7.4  | 9.4  | 6.5   | 7.5  | 9.6   | 6.5   | 7.9  | 7.4  | 8.9   | 9.6   | 9.9   |
| Oas1a       | 3.7   | 2.3  | 3.1  | 4.7   | 4.2  | 2.2   | 1.2   | 1.2  | 0.8  | 1.1   | 0.5   | 2.4   |
| Oas1b       | 1.4   | 0.8  | 1.2  | 1.1   | 0.9  | 0.9   | 0.8   | 0.6  | 0.7  | 0.5   | 0.4   | 0.7   |
| Oas1c       | 3.0   | 2.7  | 3.0  | 2.9   | 1.8  | 3.1   | 1.6   | 1.4  | 1.4  | 1.6   | 1.3   | 1.5   |
| Oas1d       | 0.1   | 0.0  | 0.0  | 0.1   | 0.1  | 0.1   | 0.0   | 0.1  | 0.0  | 0.1   | 0.0   | 0.1   |

Online Table 1

|             |       |       |       |       |       |       |       |       |       |       |       |       |
|-------------|-------|-------|-------|-------|-------|-------|-------|-------|-------|-------|-------|-------|
| Oas1g       | 0.4   | 0.4   | 0.4   | 0.8   | 0.7   | 0.3   | 0.3   | 0.2   | 0.2   | 0.1   | 0.2   | 0.4   |
| Oas2        | 1.6   | 1.4   | 1.9   | 1.6   | 1.6   | 0.9   | 0.5   | 0.3   | 0.2   | 0.1   | 0.1   | 0.8   |
| Oas3        | 0.2   | 0.1   | 0.1   | 0.7   | 0.3   | 0.1   | 0.1   | 0.0   | 0.0   | 0.0   | 0.0   | 0.1   |
| Oasl1       | 0.9   | 0.3   | 0.4   | 2.1   | 0.3   | 1.4   | 0.2   | 0.2   | 0.1   | 0.2   | 0.2   | 0.4   |
| Oasl2       | 6.2   | 3.3   | 6.2   | 11.1  | 5.0   | 5.6   | 3.7   | 2.5   | 2.1   | 1.5   | 2.2   | 6.7   |
| Oat         | 128.7 | 123.9 | 126.6 | 117.1 | 117.4 | 109.9 | 120.3 | 149.6 | 148.7 | 151.5 | 143.9 | 155.0 |
| Oaz1        | 159.8 | 176.6 | 134.8 | 146.3 | 207.6 | 147.9 | 111.2 | 116.9 | 216.2 | 221.9 | 137.7 | 136.6 |
| Oaz1-ps     | 47.0  | 17.0  | 26.9  | 57.8  | 19.4  | 45.9  | 76.8  | 69.8  | 9.2   | 0.1   | 47.7  | 44.6  |
| Oaz2        | 35.3  | 36.0  | 37.0  | 33.3  | 33.9  | 32.6  | 30.3  | 30.0  | 38.7  | 44.0  | 37.0  | 38.7  |
| Oaz3        | 0.1   | 0.0   | 0.0   | 0.0   | 0.0   | 0.0   | 0.2   | 0.0   | 0.1   | 0.0   | 0.1   | 0.0   |
| Obfc1       | 5.1   | 5.2   | 5.2   | 4.1   | 4.3   | 5.6   | 3.5   | 5.3   | 3.3   | 3.8   | 4.2   | 3.9   |
| Obscn       | 0.0   | 0.0   | 0.0   | 0.0   | 0.0   | 0.0   | 0.0   | 0.0   | 0.0   | 0.0   | 0.0   | 0.0   |
| Obsl1       | 1.8   | 2.3   | 3.0   | 1.2   | 1.8   | 1.9   | 3.0   | 3.0   | 3.7   | 3.0   | 2.3   | 2.6   |
| Oc90        | 0.0   | 0.0   | 0.0   | 0.0   | 0.0   | 0.0   | 0.0   | 0.0   | 0.0   | 0.0   | 0.0   | 0.0   |
| Oca2        | 0.0   | 0.0   | 0.0   | 0.0   | 0.0   | 0.0   | 0.0   | 0.0   | 0.0   | 0.0   | 0.0   | 0.0   |
| Ocel1       | 2.9   | 2.9   | 2.4   | 2.0   | 2.7   | 2.8   | 3.1   | 3.2   | 3.2   | 2.8   | 2.0   | 2.8   |
| Ociad1      | 79.5  | 74.9  | 66.8  | 80.1  | 69.6  | 71.3  | 72.5  | 69.7  | 70.0  | 79.3  | 78.9  | 80.0  |
| Ociad2      | 1.8   | 1.4   | 1.2   | 1.6   | 0.9   | 1.7   | 0.6   | 0.8   | 0.8   | 1.8   | 1.2   | 1.1   |
| Ocln        | 0.0   | 0.0   | 0.0   | 0.0   | 0.0   | 0.0   | 0.0   | 0.0   | 0.0   | 0.0   | 0.0   | 0.0   |
| Ocrl        | 6.5   | 7.0   | 5.9   | 7.1   | 5.8   | 7.4   | 6.5   | 5.6   | 6.3   | 5.3   | 5.9   | 5.8   |
| Ocstamp     | 0.2   | 0.2   | 0.1   | 0.2   | 0.1   | 0.1   | 0.1   | 0.1   | 0.1   | 0.0   | 0.2   | 0.1   |
| Odc1        | 94.0  | 67.1  | 51.5  | 89.7  | 58.4  | 101.8 | 59.9  | 44.8  | 46.4  | 69.9  | 61.0  | 53.8  |
| Odf1        | 0.0   | 0.0   | 0.1   | 0.1   | 0.0   | 0.0   | 0.0   | 0.0   | 0.0   | 0.0   | 0.0   | 0.0   |
| Odf2        | 16.1  | 16.6  | 19.6  | 16.7  | 15.3  | 16.1  | 20.5  | 18.3  | 17.8  | 14.3  | 19.2  | 17.4  |
| Odf2l       | 5.6   | 6.7   | 5.2   | 5.6   | 4.6   | 5.2   | 4.3   | 4.6   | 4.6   | 5.8   | 5.5   | 5.0   |
| Odf3        | 0.1   | 0.0   | 0.0   | 0.0   | 0.0   | 0.0   | 0.0   | 0.0   | 0.1   | 0.0   | 0.0   | 0.0   |
| Odf3b       | 0.0   | 0.0   | 0.0   | 0.0   | 0.0   | 0.1   | 0.1   | 0.0   | 0.0   | 0.0   | 0.1   | 0.0   |
| Odf3l2      | 0.0   | 0.0   | 0.0   | 0.0   | 0.0   | 0.0   | 0.0   | 0.0   | 0.0   | 0.0   | 0.1   | 0.0   |
| Ofd1        | 3.7   | 4.5   | 4.3   | 3.2   | 3.3   | 3.0   | 4.6   | 4.0   | 3.7   | 3.4   | 4.3   | 4.7   |
| Ogdh        | 14.8  | 14.8  | 14.7  | 16.8  | 16.0  | 15.5  | 16.4  | 15.5  | 13.1  | 13.1  | 14.4  | 12.8  |
| Ogdhl       | 15.6  | 12.0  | 8.2   | 11.6  | 9.6   | 19.4  | 5.6   | 4.1   | 4.3   | 10.4  | 6.6   | 7.7   |
| Ogfod1      | 7.2   | 6.2   | 5.6   | 7.2   | 5.9   | 6.7   | 6.5   | 5.1   | 5.6   | 6.3   | 6.0   | 6.7   |
| Ogfod2      | 6.6   | 6.1   | 4.7   | 6.3   | 5.9   | 6.4   | 4.3   | 4.4   | 5.2   | 6.2   | 5.3   | 4.8   |
| Ogfod3      | 2.0   | 1.2   | 2.3   | 2.0   | 1.5   | 1.9   | 2.0   | 3.4   | 1.7   | 1.8   | 2.0   | 1.7   |
| Ogfr        | 17.8  | 17.0  | 19.4  | 16.0  | 18.4  | 13.8  | 16.9  | 20.9  | 19.5  | 18.6  | 17.6  | 20.3  |
| Ogfrl1      | 2.2   | 2.6   | 3.6   | 2.8   | 2.4   | 3.1   | 2.3   | 2.1   | 1.4   | 1.2   | 1.9   | 1.9   |
| Ogg1        | 4.0   | 3.8   | 3.3   | 3.9   | 3.9   | 4.3   | 3.5   | 3.8   | 3.3   | 4.1   | 3.0   | 3.3   |
| Ogn         | 5.1   | 6.3   | 13.4  | 3.7   | 4.0   | 2.7   | 2.6   | 7.6   | 7.4   | 9.5   | 9.1   | 9.2   |
| Ogt         | 16.5  | 18.2  | 16.8  | 15.9  | 17.1  | 18.5  | 14.4  | 16.8  | 17.8  | 15.0  | 16.5  | 14.5  |
| Oip5        | 0.8   | 1.5   | 2.2   | 0.5   | 1.7   | 0.7   | 1.9   | 1.5   | 1.8   | 1.2   | 1.5   | 0.7   |
| Oit3        | 0.2   | 0.1   | 0.1   | 0.6   | 0.9   | 0.5   | 0.1   | 0.1   | 0.0   | 0.1   | 0.1   | 0.1   |
| Ola1        | 36.3  | 28.0  | 30.1  | 34.4  | 29.1  | 34.1  | 29.7  | 27.7  | 27.7  | 29.8  | 34.5  | 33.5  |
| Olfm1       | 7.4   | 7.0   | 7.3   | 11.5  | 10.1  | 11.5  | 8.8   | 5.6   | 5.5   | 4.9   | 7.6   | 6.6   |
| Olfm2       | 0.6   | 0.6   | 0.2   | 0.5   | 0.5   | 0.9   | 0.4   | 0.1   | 0.1   | 0.3   | 0.7   | 0.4   |
| Olfml1      | 1.1   | 4.0   | 10.2  | 0.5   | 1.9   | 0.3   | 2.3   | 8.5   | 3.7   | 1.3   | 1.5   | 2.4   |
| Olfml2a     | 0.1   | 0.1   | 0.3   | 0.0   | 0.0   | 0.0   | 0.1   | 0.1   | 0.0   | 0.0   | 0.0   | 0.1   |
| Olfml2b     | 6.7   | 6.5   | 11.4  | 3.3   | 6.3   | 5.1   | 9.4   | 17.1  | 12.6  | 19.0  | 17.1  | 15.8  |
| Olfml3      | 34.5  | 69.0  | 182.5 | 31.0  | 83.7  | 20.4  | 82.4  | 125.2 | 96.0  | 56.8  | 51.6  | 94.2  |
| Olf1033     | 0.3   | 0.3   | 0.3   | 0.4   | 0.3   | 0.4   | 0.4   | 0.3   | 0.4   | 0.9   | 0.6   | 0.6   |
| Olf1034     | 0.1   | 0.0   | 0.0   | 0.0   | 0.0   | 0.0   | 0.1   | 0.1   | 0.0   | 0.1   | 0.1   | 0.0   |
| Olf1314     | 0.1   | 0.1   | 0.0   | 0.0   | 0.0   | 0.1   | 0.0   | 0.0   | 0.0   | 0.0   | 0.1   | 0.0   |
| Olf1317     | 0.1   | 0.0   | 0.0   | 0.2   | 0.1   | 0.0   | 0.1   | 0.0   | 0.0   | 0.0   | 0.1   | 0.1   |
| Olf1318     | 0.2   | 0.2   | 0.1   | 0.0   | 0.1   | 0.2   | 0.2   | 0.0   | 0.1   | 0.1   | 0.1   | 0.1   |
| Olf1372-ps1 | 0.1   | 0.1   | 0.0   | 0.2   | 0.1   | 0.1   | 0.0   | 0.0   | 0.0   | 0.0   | 0.1   | 0.1   |
| Olf1396     | 0.1   | 0.0   | 0.0   | 0.0   | 0.0   | 0.0   | 0.0   | 0.0   | 0.0   | 0.0   | 0.0   | 0.0   |
| Olf1417     | 0.0   | 0.1   | 0.0   | 0.1   | 0.0   | 0.0   | 0.0   | 0.0   | 0.0   | 0.0   | 0.1   | 0.0   |
| Olf1420     | 0.0   | 0.0   | 0.0   | 0.1   | 0.0   | 0.1   | 0.0   | 0.0   | 0.0   | 0.0   | 0.0   | 0.0   |

Online Table 1

|             |      |      |      |      |      |      |      |      |      |      |      |      |
|-------------|------|------|------|------|------|------|------|------|------|------|------|------|
| Oifr18      | 0.0  | 0.0  | 0.0  | 0.0  | 0.0  | 0.0  | 0.0  | 0.0  | 0.0  | 0.0  | 0.0  | 0.0  |
| Oifr212     | 0.0  | 0.0  | 0.0  | 0.2  | 0.0  | 0.1  | 0.1  | 0.0  | 0.0  | 0.1  | 0.0  | 0.0  |
| Oifr239     | 0.0  | 0.0  | 0.0  | 0.0  | 0.0  | 0.0  | 0.0  | 0.0  | 0.0  | 0.0  | 0.0  | 0.0  |
| Oifr419     | 0.0  | 0.0  | 0.0  | 0.1  | 0.1  | 0.0  | 0.0  | 0.0  | 0.0  | 0.0  | 0.1  | 0.0  |
| Oifr420     | 0.3  | 0.2  | 0.2  | 0.3  | 0.1  | 0.3  | 0.2  | 0.1  | 0.2  | 0.2  | 0.1  | 0.0  |
| Oifr421-ps1 | 0.0  | 0.2  | 0.0  | 0.3  | 0.1  | 0.0  | 0.1  | 0.0  | 0.0  | 0.0  | 0.1  | 0.0  |
| Oifr456     | 0.1  | 0.2  | 0.0  | 0.0  | 0.1  | 0.0  | 0.2  | 0.1  | 0.1  | 0.0  | 0.0  | 0.0  |
| Oifr543     | 0.1  | 0.3  | 0.3  | 0.2  | 0.1  | 0.1  | 0.1  | 0.4  | 0.1  | 0.4  | 0.1  | 0.1  |
| Oifr544     | 0.3  | 0.2  | 0.1  | 0.0  | 0.3  | 0.2  | 0.0  | 0.1  | 0.1  | 0.2  | 0.2  | 0.2  |
| Oifr545     | 0.3  | 0.1  | 0.2  | 0.1  | 0.3  | 0.1  | 0.0  | 0.1  | 0.0  | 0.1  | 0.1  | 0.1  |
| Oifr558     | 0.0  | 0.0  | 0.0  | 0.0  | 0.0  | 0.0  | 0.1  | 0.1  | 0.1  | 0.0  | 0.0  | 0.0  |
| Oifr56      | 0.2  | 0.1  | 0.1  | 0.4  | 0.2  | 0.2  | 0.2  | 0.1  | 0.1  | 0.1  | 0.2  | 0.1  |
| Oifr613     | 2.2  | 3.2  | 2.5  | 1.9  | 2.7  | 1.7  | 2.2  | 1.7  | 1.5  | 2.1  | 2.4  | 1.8  |
| Oifr692     | 0.0  | 0.0  | 0.0  | 0.0  | 0.0  | 0.0  | 0.0  | 0.0  | 0.1  | 0.0  | 0.1  | 0.0  |
| Oifr78      | 0.1  | 0.0  | 0.0  | 0.1  | 0.1  | 0.0  | 0.0  | 0.0  | 0.0  | 0.0  | 0.0  | 0.0  |
| Oifr856-ps1 | 7.5  | 10.0 | 8.5  | 7.4  | 8.3  | 6.5  | 9.1  | 6.5  | 5.4  | 6.8  | 6.7  | 5.6  |
| Oifr920     | 0.0  | 0.1  | 0.1  | 0.3  | 0.1  | 0.0  | 0.0  | 0.0  | 0.0  | 0.1  | 0.2  | 0.1  |
| Oifr99      | 0.0  | 0.0  | 0.0  | 0.1  | 0.1  | 0.1  | 0.0  | 0.0  | 0.0  | 0.0  | 0.0  | 0.1  |
| Olr1        | 1.2  | 0.5  | 0.4  | 0.9  | 2.0  | 0.3  | 2.5  | 0.5  | 1.7  | 2.6  | 1.3  | 2.2  |
| Oma1        | 7.1  | 6.3  | 5.7  | 6.7  | 6.2  | 6.1  | 6.1  | 4.9  | 5.3  | 7.8  | 7.5  | 7.2  |
| Omd         | 0.3  | 0.2  | 0.5  | 0.5  | 0.2  | 0.4  | 0.2  | 0.3  | 0.2  | 0.2  | 0.0  | 0.2  |
| Omg         | 0.0  | 0.0  | 0.1  | 0.0  | 0.1  | 0.1  | 0.1  | 0.1  | 0.1  | 0.1  | 0.1  | 0.1  |
| Omp         | 0.1  | 0.0  | 0.1  | 0.0  | 0.1  | 0.0  | 0.1  | 0.2  | 0.0  | 0.0  | 0.1  | 0.1  |
| Onecut2     | 0.0  | 0.0  | 0.0  | 0.1  | 0.0  | 0.1  | 0.1  | 0.0  | 0.0  | 0.0  | 0.0  | 0.0  |
| Opa1        | 11.9 | 11.7 | 10.5 | 11.7 | 11.1 | 12.6 | 11.0 | 10.3 | 9.5  | 10.7 | 11.3 | 10.3 |
| Opa3        | 8.4  | 7.6  | 7.4  | 9.9  | 8.3  | 8.1  | 9.7  | 8.6  | 8.3  | 7.4  | 9.0  | 8.1  |
| Opcml       | 0.0  | 0.0  | 0.0  | 0.0  | 0.0  | 0.1  | 0.0  | 0.0  | 0.0  | 0.0  | 0.0  | 0.0  |
| Ophn1       | 1.8  | 2.1  | 1.9  | 2.1  | 2.6  | 1.7  | 1.8  | 2.7  | 2.3  | 2.3  | 2.3  | 2.1  |
| Oplah       | 12.2 | 11.7 | 9.6  | 6.2  | 6.4  | 9.2  | 4.9  | 9.1  | 5.9  | 9.8  | 8.1  | 6.6  |
| Opn1mw      | 0.0  | 0.3  | 0.1  | 0.2  | 0.1  | 0.0  | 0.1  | 0.4  | 0.1  | 0.2  | 0.1  | 0.1  |
| Opn1sw      | 0.3  | 0.4  | 0.4  | 0.2  | 0.4  | 0.5  | 0.4  | 0.7  | 0.4  | 0.3  | 0.3  | 0.4  |
| Opn3        | 1.4  | 1.1  | 1.3  | 1.4  | 1.1  | 1.0  | 1.6  | 1.2  | 1.4  | 0.8  | 1.3  | 0.9  |
| Opn5        | 0.0  | 0.0  | 0.0  | 0.0  | 0.0  | 0.0  | 0.0  | 0.0  | 0.0  | 0.0  | 0.0  | 0.0  |
| Opr11       | 0.1  | 0.2  | 0.1  | 0.1  | 0.2  | 0.1  | 0.1  | 0.1  | 0.1  | 0.1  | 0.1  | 0.1  |
| Optc        | 1.1  | 1.2  | 0.9  | 0.8  | 0.4  | 0.9  | 0.3  | 0.8  | 0.4  | 1.0  | 0.7  | 1.0  |
| Optn        | 13.2 | 14.1 | 13.8 | 17.3 | 11.9 | 14.8 | 13.5 | 12.5 | 10.5 | 8.0  | 12.6 | 12.5 |
| Orai1       | 6.6  | 5.0  | 4.5  | 6.3  | 7.6  | 5.9  | 8.5  | 5.9  | 6.7  | 6.3  | 6.7  | 5.8  |
| Orai2       | 14.9 | 15.1 | 15.3 | 14.2 | 14.0 | 12.5 | 15.3 | 13.6 | 13.2 | 12.6 | 12.5 | 14.4 |
| Orai3       | 10.5 | 11.3 | 11.4 | 13.3 | 10.3 | 14.6 | 11.2 | 11.9 | 11.5 | 10.5 | 10.6 | 10.0 |
| Oraov1      | 13.6 | 13.3 | 12.8 | 15.0 | 12.3 | 11.8 | 12.8 | 12.8 | 14.4 | 9.9  | 14.0 | 13.9 |
| Orc1        | 0.6  | 0.9  | 1.3  | 0.2  | 0.9  | 0.2  | 1.1  | 0.7  | 0.9  | 0.7  | 1.0  | 0.6  |
| Orc2        | 9.4  | 9.6  | 8.7  | 9.8  | 8.4  | 9.1  | 8.3  | 7.2  | 7.4  | 8.9  | 8.9  | 8.5  |
| Orc3        | 7.4  | 8.5  | 8.0  | 7.4  | 7.6  | 8.0  | 7.1  | 7.6  | 6.9  | 7.2  | 8.0  | 7.9  |
| Orc4        | 10.5 | 11.9 | 11.4 | 10.8 | 11.4 | 12.1 | 9.8  | 9.8  | 11.4 | 13.0 | 13.2 | 12.0 |
| Orc5        | 6.0  | 7.8  | 7.2  | 6.8  | 6.8  | 6.1  | 7.0  | 6.8  | 6.7  | 6.0  | 7.7  | 6.6  |
| Orc6        | 8.5  | 11.1 | 10.6 | 5.8  | 8.3  | 6.7  | 9.2  | 9.9  | 10.1 | 10.9 | 9.4  | 9.0  |
| ORF63       | 0.5  | 0.5  | 0.3  | 0.8  | 0.9  | 0.5  | 0.6  | 0.3  | 1.0  | 1.1  | 1.2  | 0.8  |
| Orm1        | 0.0  | 0.1  | 0.1  | 0.0  | 0.0  | 0.0  | 0.1  | 0.0  | 0.1  | 0.1  | 0.0  | 0.0  |
| Orm2        | 0.1  | 0.0  | 0.0  | 0.1  | 0.1  | 0.1  | 0.1  | 0.1  | 0.0  | 0.0  | 0.0  | 0.1  |
| Orm3        | 0.0  | 0.1  | 0.0  | 0.3  | 0.1  | 0.0  | 0.0  | 0.1  | 0.0  | 0.1  | 0.0  | 0.0  |
| Ormdl1      | 4.8  | 4.8  | 4.9  | 5.7  | 6.8  | 7.3  | 4.5  | 3.8  | 4.5  | 6.0  | 5.1  | 5.1  |
| Ormdl2      | 15.0 | 16.1 | 13.3 | 14.9 | 14.8 | 14.0 | 13.5 | 15.4 | 15.3 | 15.1 | 17.1 | 15.6 |
| Ormdl3      | 38.8 | 37.8 | 34.1 | 47.0 | 37.2 | 46.5 | 35.4 | 30.3 | 38.1 | 40.2 | 37.2 | 40.8 |
| Os9         | 37.1 | 32.7 | 41.0 | 48.7 | 37.4 | 44.8 | 39.3 | 43.7 | 35.5 | 33.9 | 37.6 | 41.9 |
| Osbp        | 12.6 | 13.1 | 13.0 | 12.5 | 12.2 | 10.4 | 13.5 | 12.4 | 12.8 | 11.0 | 13.2 | 13.8 |
| Osbp2       | 0.1  | 0.0  | 0.1  | 0.2  | 0.1  | 0.2  | 0.1  | 0.0  | 0.0  | 0.1  | 0.1  | 0.1  |
| Osbpl10     | 0.7  | 0.6  | 0.7  | 0.8  | 0.7  | 0.6  | 0.7  | 0.8  | 0.5  | 0.8  | 0.8  | 0.6  |

Online Table 1

|                  |       |       |       |       |       |       |       |       |       |       |       |       |
|------------------|-------|-------|-------|-------|-------|-------|-------|-------|-------|-------|-------|-------|
| Osbpl11          | 7.5   | 7.1   | 6.8   | 7.3   | 6.9   | 8.2   | 7.1   | 7.8   | 7.4   | 6.9   | 8.2   | 8.0   |
| Osbpl1a          | 12.4  | 12.1  | 12.2  | 12.2  | 9.2   | 12.3  | 10.8  | 9.9   | 11.2  | 8.9   | 10.3  | 10.6  |
| Osbpl2           | 18.9  | 16.5  | 16.2  | 22.5  | 14.5  | 20.5  | 16.7  | 17.9  | 14.1  | 17.9  | 20.3  | 20.3  |
| Osbpl3           | 1.3   | 0.6   | 0.4   | 1.0   | 1.1   | 0.8   | 0.8   | 0.5   | 0.4   | 1.1   | 0.8   | 0.7   |
| Osbpl5           | 38.8  | 36.7  | 28.4  | 40.8  | 34.2  | 38.8  | 40.6  | 30.3  | 38.1  | 35.2  | 36.5  | 32.4  |
| Osbpl6           | 0.2   | 0.2   | 0.3   | 0.2   | 0.2   | 0.2   | 0.2   | 0.2   | 0.2   | 0.3   | 0.4   | 0.2   |
| Osbpl7           | 0.9   | 0.9   | 1.1   | 0.6   | 0.9   | 1.0   | 1.0   | 1.1   | 0.8   | 0.9   | 0.6   | 0.8   |
| Osbpl8           | 7.9   | 8.4   | 8.8   | 16.6  | 17.8  | 8.1   | 9.3   | 8.5   | 8.5   | 8.1   | 10.1  | 9.7   |
| Osbpl9           | 58.0  | 53.6  | 50.5  | 61.5  | 45.6  | 58.3  | 55.7  | 48.4  | 49.6  | 50.4  | 56.6  | 56.9  |
| Oscar            | 0.1   | 0.1   | 0.1   | 0.1   | 0.1   | 0.1   | 0.0   | 0.2   | 0.1   | 0.1   | 0.1   | 0.1   |
| Oscp1            | 2.0   | 1.7   | 1.9   | 1.6   | 1.3   | 2.2   | 1.6   | 1.7   | 1.7   | 1.5   | 1.7   | 1.8   |
| Osgep            | 16.2  | 14.8  | 16.8  | 13.3  | 14.8  | 13.5  | 17.9  | 17.8  | 17.4  | 17.3  | 16.2  | 16.9  |
| Osgep1           | 2.5   | 2.9   | 2.9   | 2.0   | 2.1   | 2.3   | 2.3   | 2.6   | 2.5   | 2.1   | 2.7   | 2.4   |
| Osgin1           | 5.4   | 5.6   | 3.9   | 8.4   | 6.6   | 7.1   | 5.1   | 3.2   | 2.8   | 8.9   | 4.9   | 4.5   |
| Osgin2           | 2.9   | 3.1   | 2.7   | 2.7   | 5.4   | 2.4   | 2.9   | 2.7   | 3.5   | 3.3   | 3.2   | 3.2   |
| Osm              | 0.1   | 0.0   | 0.0   | 0.2   | 0.6   | 0.0   | 0.1   | 0.0   | 0.0   | 0.1   | 0.0   | 0.0   |
| Osmr             | 60.6  | 78.8  | 90.3  | 57.0  | 79.7  | 46.2  | 89.3  | 84.0  | 82.2  | 82.2  | 82.1  | 92.3  |
| Osr1             | 2.2   | 1.7   | 2.5   | 1.1   | 1.3   | 2.1   | 2.2   | 4.2   | 3.3   | 6.0   | 4.7   | 3.8   |
| Osr2             | 0.1   | 0.1   | 0.1   | 0.0   | 0.0   | 0.1   | 0.0   | 0.1   | 0.2   | 0.1   | 0.0   | 0.1   |
| Ost4             | 313.8 | 277.8 | 239.1 | 369.1 | 274.7 | 373.5 | 289.8 | 269.3 | 249.4 | 249.6 | 292.0 | 270.2 |
| Ostc             | 114.3 | 104.6 | 91.8  | 122.5 | 102.2 | 102.3 | 105.8 | 102.4 | 113.7 | 114.2 | 116.5 | 114.9 |
| Ostf1            | 60.3  | 50.6  | 49.1  | 74.6  | 71.8  | 55.5  | 61.8  | 48.6  | 59.7  | 54.3  | 62.4  | 61.3  |
| Ostm1            | 32.4  | 27.1  | 24.1  | 34.3  | 29.1  | 32.5  | 26.2  | 23.3  | 26.2  | 27.8  | 29.8  | 31.7  |
| Ostn             | 0.3   | 0.1   | 0.0   | 0.0   | 0.0   | 0.0   | 0.0   | 0.0   | 0.0   | 0.0   | 0.1   | 0.0   |
| Otoa             | 0.1   | 0.1   | 0.0   | 0.1   | 0.2   | 0.0   | 0.0   | 0.0   | 0.0   | 0.0   | 0.0   | 0.0   |
| Otof             | 0.0   | 0.0   | 0.0   | 0.0   | 0.0   | 0.0   | 0.0   | 0.0   | 0.0   | 0.0   | 0.0   | 0.0   |
| Otogl            | 0.0   | 0.0   | 0.0   | 0.0   | 0.0   | 0.0   | 0.0   | 0.0   | 0.0   | 0.0   | 0.0   | 0.0   |
| Ott              | 0.0   | 0.0   | 0.0   | 0.0   | 0.0   | 0.0   | 0.0   | 0.0   | 0.0   | 0.0   | 0.0   | 0.0   |
| TTMUSG0000001660 | 0.1   | 0.7   | 1.6   | 2.8   | 1.4   | 0.9   | 0.6   | 1.2   | 1.2   | 1.7   | 2.1   | 2.4   |
| Otub1            | 40.1  | 39.9  | 33.0  | 40.7  | 32.8  | 40.5  | 37.9  | 38.3  | 35.7  | 36.3  | 35.5  | 32.9  |
| Otub2            | 4.0   | 3.5   | 3.0   | 4.8   | 2.9   | 4.7   | 2.8   | 3.0   | 2.9   | 2.6   | 3.4   | 2.8   |
| Otud1            | 3.7   | 2.6   | 3.2   | 3.7   | 3.0   | 3.3   | 2.4   | 2.1   | 2.5   | 2.6   | 2.4   | 2.8   |
| Otud3            | 6.1   | 7.7   | 6.4   | 7.0   | 6.6   | 7.0   | 7.5   | 6.7   | 6.2   | 6.5   | 6.8   | 7.5   |
| Otud4            | 8.9   | 9.6   | 9.9   | 11.2  | 9.5   | 9.9   | 9.8   | 8.0   | 7.9   | 9.4   | 10.6  | 9.3   |
| Otud5            | 15.4  | 16.2  | 16.2  | 17.0  | 15.1  | 16.1  | 16.4  | 15.1  | 16.1  | 16.0  | 16.8  | 15.6  |
| Otud6b           | 21.2  | 19.4  | 18.7  | 26.7  | 18.4  | 22.9  | 20.6  | 16.9  | 17.0  | 20.2  | 23.4  | 22.3  |
| Otud7a           | 0.1   | 0.1   | 0.1   | 0.1   | 0.1   | 0.1   | 0.1   | 0.0   | 0.1   | 0.0   | 0.1   | 0.0   |
| Otud7b           | 8.4   | 7.7   | 7.1   | 11.3  | 7.3   | 12.2  | 8.5   | 6.7   | 7.5   | 8.3   | 9.0   | 8.2   |
| Ovca2            | 4.1   | 5.0   | 4.6   | 4.7   | 5.2   | 4.2   | 4.1   | 5.6   | 4.5   | 5.3   | 5.3   | 4.1   |
| Ovgp1            | 0.5   | 0.8   | 0.6   | 0.4   | 0.5   | 0.5   | 0.4   | 0.4   | 0.4   | 0.4   | 0.5   | 0.5   |
| Ovol1            | 0.1   | 0.1   | 0.1   | 0.0   | 0.1   | 0.1   | 0.1   | 0.1   | 0.1   | 0.1   | 0.0   | 0.0   |
| Oxa1l            | 8.4   | 7.1   | 7.3   | 9.0   | 7.0   | 7.9   | 7.4   | 9.5   | 7.5   | 8.2   | 8.0   | 7.8   |
| Oxct1            | 36.2  | 33.4  | 39.9  | 26.5  | 25.8  | 35.7  | 29.1  | 33.6  | 33.9  | 33.2  | 39.1  | 37.0  |
| Oxct2a           | 0.0   | 0.0   | 0.1   | 0.0   | 0.0   | 0.0   | 0.0   | 0.0   | 0.0   | 0.0   | 0.0   | 0.0   |
| Oxld1            | 4.3   | 5.0   | 4.4   | 4.4   | 4.9   | 4.9   | 3.6   | 4.4   | 4.6   | 4.7   | 4.0   | 4.7   |
| Oxnad1           | 4.3   | 5.2   | 4.2   | 4.3   | 3.6   | 4.8   | 3.1   | 4.3   | 3.6   | 3.9   | 4.7   | 4.0   |
| Oxr1             | 25.8  | 22.9  | 23.7  | 36.0  | 24.7  | 33.5  | 27.5  | 24.6  | 21.0  | 21.3  | 28.7  | 23.4  |
| Oxsm             | 2.5   | 2.7   | 3.3   | 2.7   | 2.7   | 2.4   | 2.7   | 2.9   | 2.6   | 2.4   | 2.5   | 2.5   |
| Oxsr1            | 16.4  | 12.4  | 9.4   | 18.6  | 12.3  | 19.1  | 11.2  | 8.8   | 10.0  | 14.1  | 13.9  | 12.1  |
| Oxtr             | 0.2   | 0.9   | 3.8   | 0.1   | 0.4   | 0.1   | 0.5   | 1.2   | 0.3   | 0.3   | 0.3   | 0.3   |
| P2rx1            | 0.1   | 0.0   | 0.1   | 0.1   | 0.0   | 0.1   | 0.0   | 0.1   | 0.0   | 0.0   | 0.0   | 0.1   |
| P2rx3            | 0.3   | 0.2   | 0.3   | 0.1   | 0.2   | 0.2   | 0.1   | 0.1   | 0.1   | 0.2   | 0.1   | 0.3   |
| P2rx4            | 18.8  | 16.6  | 22.2  | 28.7  | 29.5  | 20.3  | 23.5  | 22.7  | 20.0  | 20.6  | 18.7  | 25.5  |
| P2rx5            | 0.5   | 0.4   | 0.6   | 0.6   | 0.5   | 0.8   | 0.6   | 0.5   | 0.3   | 0.4   | 0.4   | 0.4   |
| P2rx6            | 0.2   | 0.5   | 0.7   | 0.4   | 0.4   | 0.6   | 0.0   | 0.7   | 0.3   | 0.6   | 0.3   | 0.3   |
| P2rx7            | 4.1   | 4.1   | 4.8   | 4.6   | 5.1   | 4.5   | 2.3   | 2.6   | 1.7   | 3.3   | 2.8   | 2.3   |
| P2ry1            | 0.2   | 0.3   | 0.3   | 0.1   | 0.4   | 0.1   | 0.3   | 0.3   | 0.2   | 0.2   | 0.1   | 0.2   |

Online Table 1

|          |       |       |       |       |       |       |       |       |       |       |       |       |
|----------|-------|-------|-------|-------|-------|-------|-------|-------|-------|-------|-------|-------|
| P2ry12   | 0.0   | 0.0   | 0.0   | 0.1   | 0.2   | 0.0   | 0.0   | 0.0   | 0.0   | 0.0   | 0.0   | 0.0   |
| P2ry13   | 0.0   | 0.0   | 0.0   | 0.1   | 0.0   | 0.0   | 0.0   | 0.0   | 0.0   | 0.0   | 0.0   | 0.0   |
| P2ry14   | 0.1   | 0.2   | 0.1   | 0.2   | 0.1   | 0.1   | 0.1   | 0.0   | 0.1   | 0.0   | 0.0   | 0.1   |
| P2ry2    | 2.6   | 2.8   | 2.8   | 3.4   | 2.9   | 2.8   | 3.0   | 2.6   | 1.6   | 1.6   | 1.5   | 1.5   |
| P2ry4    | 0.0   | 0.0   | 0.0   | 0.0   | 0.0   | 0.0   | 0.0   | 0.0   | 0.0   | 0.0   | 0.0   | 0.0   |
| P2ry6    | 5.0   | 3.8   | 4.0   | 7.5   | 14.0  | 3.0   | 4.4   | 3.0   | 2.5   | 2.2   | 1.7   | 3.0   |
| P4ha1    | 187.9 | 186.2 | 155.2 | 183.9 | 150.3 | 194.0 | 183.8 | 140.0 | 200.2 | 193.2 | 197.9 | 200.3 |
| P4ha2    | 48.1  | 53.8  | 43.8  | 67.4  | 54.3  | 60.1  | 53.2  | 35.5  | 53.0  | 40.3  | 41.1  | 47.1  |
| P4ha3    | 3.7   | 3.8   | 5.3   | 4.2   | 8.0   | 5.4   | 10.3  | 9.5   | 10.7  | 7.3   | 7.0   | 9.3   |
| P4hb     | 572.4 | 519.7 | 522.7 | 559.9 | 543.8 | 470.1 | 600.6 | 653.4 | 587.6 | 630.1 | 629.6 | 718.5 |
| P4htm    | 4.1   | 3.2   | 3.3   | 4.5   | 2.2   | 6.9   | 2.4   | 2.7   | 2.8   | 2.6   | 2.6   | 3.5   |
| Pa2g4    | 25.0  | 21.9  | 21.1  | 28.7  | 24.4  | 24.2  | 30.2  | 21.2  | 18.7  | 23.5  | 24.8  | 23.3  |
| Pabpc1   | 108.1 | 88.5  | 89.6  | 121.7 | 103.3 | 118.5 | 109.7 | 100.0 | 76.8  | 93.3  | 117.4 | 91.4  |
| Pabpc1l  | 0.1   | 0.1   | 0.0   | 0.1   | 0.1   | 0.1   | 0.1   | 0.1   | 0.0   | 0.1   | 0.0   | 0.0   |
| Pabpc4   | 28.4  | 18.5  | 18.0  | 24.1  | 18.0  | 27.4  | 21.7  | 21.5  | 18.1  | 20.4  | 23.6  | 21.1  |
| Pabpc4l  | 0.5   | 0.6   | 0.7   | 0.4   | 0.3   | 0.9   | 0.4   | 0.5   | 0.5   | 0.5   | 0.5   | 0.7   |
| Pabpc5   | 0.3   | 0.4   | 0.3   | 0.2   | 0.1   | 0.8   | 0.3   | 0.1   | 0.1   | 0.2   | 0.4   | 0.2   |
| Pabpc6   | 0.0   | 0.0   | 0.0   | 0.0   | 0.0   | 0.0   | 0.0   | 0.0   | 0.0   | 0.0   | 0.0   | 0.0   |
| Pabpn1   | 24.9  | 23.8  | 27.3  | 23.6  | 22.9  | 24.0  | 26.5  | 22.7  | 25.9  | 21.1  | 24.1  | 22.9  |
| Pacrg    | 0.2   | 0.3   | 0.5   | 0.2   | 0.0   | 0.6   | 0.3   | 0.4   | 0.1   | 0.4   | 0.2   | 0.3   |
| Pacrgl   | 2.7   | 2.7   | 3.3   | 2.5   | 3.0   | 2.6   | 2.3   | 3.6   | 2.5   | 2.9   | 2.6   | 2.7   |
| Pacs1    | 2.9   | 3.4   | 3.0   | 2.7   | 3.0   | 3.4   | 3.7   | 2.6   | 2.8   | 2.6   | 2.7   | 2.8   |
| Pacs2    | 19.5  | 21.2  | 17.5  | 21.3  | 19.2  | 23.1  | 18.0  | 17.6  | 16.4  | 13.9  | 14.4  | 13.8  |
| Pacsin1  | 0.1   | 0.1   | 0.0   | 0.1   | 0.0   | 0.1   | 0.0   | 0.0   | 0.0   | 0.0   | 0.0   | 0.0   |
| Pacsin2  | 34.0  | 33.2  | 28.6  | 39.3  | 32.0  | 34.4  | 34.2  | 29.2  | 28.1  | 38.9  | 42.7  | 31.2  |
| Pacsin3  | 14.0  | 17.2  | 14.6  | 21.5  | 15.6  | 18.5  | 18.6  | 14.8  | 16.3  | 12.2  | 13.2  | 15.1  |
| Padi1    | 0.0   | 0.0   | 0.0   | 0.0   | 0.0   | 0.1   | 0.0   | 0.0   | 0.0   | 0.0   | 0.0   | 0.0   |
| Padi2    | 0.1   | 0.0   | 0.0   | 0.7   | 1.0   | 0.0   | 0.1   | 0.1   | 0.0   | 0.1   | 0.1   | 0.0   |
| Padi3    | 0.0   | 0.0   | 0.0   | 0.0   | 0.0   | 0.0   | 0.0   | 0.0   | 0.0   | 0.0   | 0.0   | 0.1   |
| Padi4    | 0.2   | 0.1   | 0.1   | 0.2   | 0.1   | 0.1   | 0.0   | 0.1   | 0.1   | 0.1   | 0.2   | 0.1   |
| Paf1     | 30.3  | 29.4  | 34.8  | 35.2  | 26.3  | 26.5  | 33.1  | 28.5  | 24.7  | 29.8  | 35.4  | 38.0  |
| Pafah1b1 | 41.4  | 42.7  | 37.8  | 41.6  | 38.5  | 39.6  | 38.6  | 37.6  | 42.6  | 42.9  | 45.7  | 45.0  |
| Pafah1b2 | 30.7  | 31.3  | 33.0  | 34.1  | 29.7  | 32.5  | 34.5  | 30.8  | 29.9  | 31.8  | 38.8  | 35.9  |
| Pafah1b3 | 4.8   | 5.9   | 4.7   | 5.0   | 5.4   | 5.6   | 6.7   | 5.9   | 7.2   | 5.9   | 7.5   | 6.4   |
| Pafah2   | 6.5   | 4.1   | 2.7   | 7.4   | 5.4   | 6.0   | 3.8   | 3.8   | 4.1   | 6.1   | 4.2   | 4.3   |
| Pag1     | 1.0   | 1.4   | 1.9   | 1.2   | 1.5   | 0.7   | 1.6   | 1.5   | 2.0   | 1.5   | 1.2   | 1.4   |
| Pagr1a   | 7.6   | 8.7   | 9.5   | 10.7  | 9.2   | 8.5   | 10.1  | 11.8  | 10.9  | 9.3   | 8.9   | 9.9   |
| Paics    | 76.9  | 59.7  | 60.2  | 61.8  | 48.8  | 65.4  | 53.3  | 57.0  | 52.3  | 56.6  | 59.6  | 58.3  |
| Paip1    | 16.7  | 17.5  | 15.9  | 14.3  | 15.4  | 15.9  | 14.6  | 13.8  | 16.4  | 18.6  | 17.4  | 18.3  |
| Paip2    | 120.5 | 125.4 | 120.9 | 116.6 | 107.6 | 116.9 | 103.0 | 106.7 | 102.1 | 116.7 | 132.2 | 129.4 |
| Paip2b   | 12.8  | 12.3  | 12.0  | 12.1  | 10.2  | 12.0  | 10.0  | 10.6  | 11.1  | 10.3  | 12.9  | 11.1  |
| Pak1     | 5.8   | 5.5   | 5.2   | 7.2   | 7.5   | 8.0   | 6.7   | 5.6   | 4.2   | 5.7   | 5.3   | 4.4   |
| Pak1ip1  | 34.0  | 29.2  | 25.1  | 33.9  | 29.0  | 29.0  | 27.2  | 25.4  | 26.0  | 29.7  | 32.3  | 29.1  |
| Pak2     | 13.8  | 15.0  | 14.4  | 16.0  | 17.3  | 15.6  | 16.2  | 13.8  | 15.0  | 16.2  | 17.8  | 16.5  |
| Pak3     | 7.3   | 7.9   | 6.5   | 7.4   | 5.8   | 7.5   | 5.6   | 4.0   | 6.2   | 7.0   | 8.9   | 6.5   |
| Pak4     | 12.4  | 12.9  | 11.0  | 8.5   | 9.8   | 9.3   | 16.1  | 18.1  | 16.0  | 11.3  | 15.4  | 12.7  |
| Pak6     | 0.1   | 0.1   | 0.1   | 0.0   | 0.0   | 0.0   | 0.0   | 0.1   | 0.0   | 0.0   | 0.0   | 0.0   |
| Pak7     | 0.0   | 0.0   | 0.0   | 0.0   | 0.0   | 0.0   | 0.0   | 0.0   | 0.0   | 0.0   | 0.0   | 0.0   |
| Palb2    | 0.5   | 0.7   | 0.8   | 0.3   | 0.8   | 0.2   | 0.6   | 0.4   | 0.6   | 0.3   | 0.6   | 0.3   |
| Pald1    | 2.3   | 2.7   | 2.8   | 1.9   | 3.0   | 1.6   | 2.4   | 2.6   | 2.3   | 3.1   | 2.3   | 2.4   |
| Pald     | 2.8   | 3.0   | 2.5   | 3.4   | 5.0   | 2.4   | 5.0   | 2.9   | 5.2   | 9.1   | 7.5   | 6.1   |
| Palm     | 15.5  | 15.2  | 16.4  | 15.4  | 11.1  | 18.8  | 16.5  | 19.1  | 20.3  | 13.2  | 17.1  | 18.7  |
| Palm2    | 2.9   | 2.7   | 3.1   | 3.3   | 2.7   | 3.1   | 3.6   | 2.2   | 2.7   | 2.3   | 2.9   | 3.4   |
| Palm3    | 0.6   | 0.6   | 0.7   | 1.2   | 0.5   | 0.7   | 0.6   | 0.5   | 0.3   | 0.4   | 0.4   | 0.4   |
| Palmd    | 0.4   | 0.1   | 0.4   | 0.1   | 0.1   | 0.1   | 0.1   | 0.7   | 0.2   | 2.4   | 1.4   | 0.7   |
| Pam      | 126.5 | 107.2 | 121.0 | 108.1 | 91.7  | 109.1 | 76.7  | 76.6  | 69.8  | 60.9  | 65.9  | 84.0  |
| Pam16    | 34.1  | 28.5  | 27.2  | 36.8  | 29.8  | 36.6  | 27.3  | 25.5  | 28.1  | 38.1  | 29.5  | 30.5  |

Online Table 1

|        |       |      |      |       |      |       |      |      |      |      |      |      |
|--------|-------|------|------|-------|------|-------|------|------|------|------|------|------|
| Pamr1  | 19.8  | 13.3 | 9.0  | 18.7  | 13.7 | 17.2  | 3.4  | 8.5  | 4.7  | 17.7 | 13.1 | 11.8 |
| Pan2   | 1.6   | 2.1  | 2.2  | 1.6   | 2.2  | 1.8   | 2.2  | 2.2  | 2.4  | 1.9  | 1.6  | 1.7  |
| Pan3   | 7.3   | 8.6  | 8.8  | 7.5   | 8.0  | 7.0   | 7.8  | 8.1  | 7.9  | 8.1  | 7.6  | 7.5  |
| Pank1  | 1.9   | 2.3  | 2.4  | 1.2   | 2.2  | 2.3   | 2.0  | 2.0  | 2.2  | 1.6  | 2.0  | 1.9  |
| Pank2  | 7.5   | 7.0  | 6.6  | 6.9   | 7.3  | 7.3   | 7.5  | 6.9  | 6.3  | 7.0  | 7.2  | 6.7  |
| Pank3  | 12.4  | 15.0 | 14.4 | 11.7  | 11.9 | 13.1  | 14.6 | 14.3 | 16.0 | 11.8 | 18.2 | 14.4 |
| Pank4  | 6.5   | 7.9  | 5.8  | 6.3   | 6.5  | 7.7   | 6.3  | 6.3  | 6.9  | 6.4  | 5.7  | 5.7  |
| Panx1  | 15.5  | 11.5 | 8.9  | 17.0  | 16.5 | 13.7  | 11.2 | 11.1 | 9.1  | 9.1  | 11.6 | 9.8  |
| Panx2  | 0.1   | 0.1  | 0.0  | 0.0   | 0.0  | 0.0   | 0.0  | 0.1  | 0.0  | 0.0  | 0.1  | 0.0  |
| Paox   | 4.4   | 5.1  | 4.6  | 3.0   | 2.8  | 3.5   | 3.7  | 4.6  | 4.4  | 3.9  | 3.4  | 3.3  |
| Papd4  | 13.4  | 12.5 | 12.3 | 12.4  | 12.0 | 13.1  | 10.2 | 10.8 | 11.6 | 10.2 | 12.1 | 12.3 |
| Papd5  | 8.3   | 8.3  | 8.3  | 12.9  | 8.5  | 11.2  | 8.0  | 6.7  | 7.4  | 7.8  | 8.9  | 8.8  |
| Papd7  | 4.5   | 4.5  | 4.6  | 4.7   | 4.7  | 4.5   | 6.4  | 4.8  | 5.4  | 4.9  | 5.2  | 5.2  |
| Papln  | 0.1   | 0.1  | 0.0  | 0.0   | 0.0  | 0.0   | 0.0  | 0.0  | 0.0  | 0.2  | 0.0  | 0.1  |
| Papola | 24.8  | 29.3 | 26.9 | 26.3  | 29.6 | 25.1  | 26.2 | 27.3 | 27.6 | 27.7 | 29.6 | 27.3 |
| Papolb | 0.0   | 0.2  | 0.0  | 0.0   | 0.1  | 0.2   | 0.1  | 0.0  | 0.0  | 0.0  | 0.1  | 0.0  |
| Papolg | 4.2   | 4.4  | 4.8  | 3.8   | 4.4  | 3.8   | 4.8  | 4.1  | 4.5  | 5.5  | 5.7  | 5.4  |
| Pappa  | 13.4  | 17.6 | 22.1 | 11.6  | 13.4 | 8.7   | 17.7 | 19.3 | 24.5 | 17.2 | 18.4 | 20.5 |
| Pappa2 | 0.2   | 0.1  | 0.2  | 0.1   | 0.1  | 0.1   | 0.2  | 1.3  | 0.5  | 0.3  | 0.4  | 0.1  |
| Papss1 | 21.8  | 20.1 | 17.9 | 16.6  | 18.5 | 16.9  | 22.4 | 25.9 | 22.5 | 21.6 | 25.9 | 19.2 |
| Papss2 | 24.9  | 22.1 | 20.7 | 24.0  | 21.8 | 20.3  | 23.8 | 24.6 | 23.2 | 14.4 | 24.4 | 20.8 |
| Paqr3  | 1.8   | 2.0  | 1.7  | 2.2   | 1.7  | 2.1   | 1.5  | 2.3  | 2.2  | 1.9  | 1.2  | 1.9  |
| Paqr4  | 2.5   | 4.0  | 3.9  | 3.2   | 3.1  | 4.2   | 5.3  | 5.4  | 5.0  | 3.1  | 4.6  | 2.8  |
| Paqr5  | 0.1   | 0.1  | 0.3  | 0.1   | 0.1  | 0.0   | 0.1  | 0.1  | 0.0  | 0.1  | 0.0  | 0.0  |
| Paqr6  | 0.2   | 0.2  | 0.3  | 0.0   | 0.0  | 0.1   | 0.1  | 0.3  | 0.1  | 0.0  | 0.1  | 0.1  |
| Paqr7  | 7.3   | 5.6  | 5.5  | 8.8   | 7.7  | 7.6   | 6.0  | 5.7  | 5.5  | 4.6  | 4.8  | 4.1  |
| Paqr8  | 1.1   | 1.3  | 1.8  | 1.2   | 1.6  | 1.2   | 1.7  | 2.0  | 1.4  | 1.9  | 1.5  | 1.7  |
| Paqr9  | 0.0   | 0.0  | 0.0  | 0.1   | 0.0  | 0.0   | 0.0  | 0.0  | 0.0  | 0.0  | 0.0  | 0.0  |
| Pard3  | 10.1  | 10.9 | 11.3 | 10.1  | 9.2  | 9.9   | 11.0 | 12.2 | 11.1 | 10.2 | 12.1 | 11.7 |
| Pard3b | 2.4   | 2.3  | 2.3  | 2.5   | 1.5  | 3.1   | 2.4  | 2.4  | 1.9  | 1.9  | 2.2  | 2.4  |
| Pard6a | 3.1   | 2.7  | 2.7  | 3.7   | 2.3  | 3.3   | 2.9  | 3.1  | 3.2  | 3.4  | 3.1  | 2.8  |
| Pard6b | 2.3   | 2.9  | 2.3  | 2.3   | 2.9  | 2.8   | 2.9  | 3.1  | 3.1  | 3.5  | 2.8  | 2.3  |
| Pard6g | 5.0   | 5.1  | 4.7  | 3.6   | 4.5  | 4.8   | 4.8  | 4.6  | 4.4  | 4.7  | 5.0  | 4.3  |
| Parg   | 16.9  | 16.7 | 15.5 | 15.9  | 15.9 | 16.7  | 13.3 | 13.1 | 13.2 | 14.8 | 14.9 | 15.6 |
| Park2  | 1.1   | 1.0  | 1.3  | 0.9   | 0.6  | 1.1   | 0.7  | 0.8  | 0.8  | 0.5  | 0.7  | 0.7  |
| Park7  | 107.5 | 88.0 | 79.8 | 130.1 | 88.7 | 118.2 | 90.1 | 95.5 | 79.1 | 89.9 | 97.5 | 87.6 |
| Parl   | 17.5  | 14.7 | 12.3 | 17.1  | 16.3 | 14.9  | 15.0 | 16.0 | 12.7 | 14.8 | 18.1 | 16.2 |
| Parm1  | 25.0  | 15.1 | 7.9  | 40.2  | 16.3 | 26.0  | 13.2 | 5.2  | 6.8  | 9.0  | 11.3 | 10.6 |
| Parn   | 11.6  | 11.0 | 11.4 | 11.4  | 8.9  | 12.8  | 10.5 | 12.2 | 10.3 | 10.1 | 11.1 | 11.6 |
| Parp1  | 12.8  | 12.4 | 13.3 | 11.6  | 13.7 | 10.9  | 13.0 | 14.3 | 10.8 | 13.4 | 12.9 | 12.1 |
| Parp10 | 3.9   | 4.1  | 4.4  | 4.7   | 5.2  | 4.7   | 3.9  | 3.4  | 5.0  | 4.8  | 3.5  | 4.4  |
| Parp11 | 4.8   | 5.1  | 5.2  | 4.8   | 4.9  | 4.2   | 4.5  | 3.9  | 3.9  | 3.8  | 3.9  | 4.1  |
| Parp12 | 8.3   | 6.7  | 8.4  | 9.2   | 8.5  | 8.1   | 7.5  | 8.1  | 7.8  | 6.7  | 6.5  | 8.9  |
| Parp14 | 5.1   | 4.3  | 5.2  | 7.8   | 7.1  | 5.2   | 4.3  | 3.3  | 2.9  | 2.5  | 2.6  | 5.4  |
| Parp16 | 0.5   | 0.6  | 0.8  | 0.5   | 0.5  | 0.8   | 0.2  | 0.8  | 0.6  | 0.7  | 0.5  | 0.5  |
| Parp2  | 10.7  | 11.5 | 13.2 | 11.1  | 10.8 | 11.3  | 11.0 | 10.1 | 9.4  | 8.1  | 10.5 | 10.1 |
| Parp3  | 80.3  | 81.1 | 82.5 | 95.1  | 81.2 | 85.2  | 92.6 | 83.6 | 93.3 | 70.5 | 86.6 | 92.5 |
| Parp4  | 1.5   | 1.7  | 1.9  | 1.4   | 1.7  | 1.7   | 1.9  | 1.4  | 1.6  | 1.5  | 1.5  | 1.6  |
| Parp6  | 7.2   | 6.2  | 5.9  | 7.6   | 4.9  | 8.2   | 5.2  | 4.7  | 5.6  | 5.3  | 5.1  | 4.0  |
| Parp8  | 6.2   | 5.6  | 6.1  | 7.3   | 6.4  | 6.4   | 5.7  | 4.5  | 5.1  | 6.8  | 5.7  | 6.0  |
| Parp9  | 8.4   | 6.3  | 9.3  | 9.6   | 9.3  | 7.1   | 7.9  | 8.1  | 7.8  | 6.5  | 6.9  | 12.6 |
| Parpbp | 0.8   | 1.6  | 2.4  | 0.3   | 2.4  | 0.3   | 2.8  | 1.1  | 2.2  | 1.0  | 1.8  | 1.5  |
| Pars2  | 1.4   | 1.4  | 1.4  | 1.0   | 1.3  | 1.7   | 1.1  | 1.3  | 1.5  | 1.3  | 1.4  | 1.1  |
| Parva  | 50.7  | 50.1 | 50.8 | 53.1  | 47.7 | 47.0  | 63.9 | 52.1 | 58.5 | 58.8 | 67.3 | 59.6 |
| Parvb  | 0.4   | 0.2  | 0.2  | 0.6   | 0.7  | 0.7   | 0.7  | 0.3  | 0.4  | 0.5  | 0.4  | 0.3  |
| Parvg  | 0.1   | 0.0  | 0.0  | 1.0   | 2.3  | 0.0   | 0.2  | 0.1  | 0.0  | 0.3  | 0.0  | 0.1  |
| Pask   | 0.9   | 1.2  | 1.6  | 0.6   | 1.3  | 0.7   | 1.5  | 1.5  | 1.4  | 1.1  | 1.3  | 1.0  |

Online Table 1



|          |      |      |      |      |      |      |      |      |      |      |      |      |
|----------|------|------|------|------|------|------|------|------|------|------|------|------|
| Pate2    | 0.0  | 0.0  | 0.0  | 0.0  | 0.0  | 0.0  | 0.0  | 0.1  | 0.0  | 0.0  | 0.0  | 0.1  |
| Patl1    | 1.7  | 2.1  | 2.3  | 2.0  | 2.1  | 1.8  | 2.7  | 1.9  | 1.7  | 1.7  | 2.5  | 1.9  |
| Patl2    | 0.0  | 0.0  | 0.1  | 0.1  | 0.0  | 0.0  | 0.0  | 0.0  | 0.0  | 0.0  | 0.0  | 0.0  |
| Patz1    | 3.4  | 2.7  | 3.0  | 2.4  | 3.1  | 3.3  | 3.0  | 3.0  | 2.4  | 2.3  | 2.2  | 2.5  |
| Pawr     | 16.3 | 14.8 | 13.4 | 16.7 | 14.8 | 13.3 | 17.1 | 10.8 | 19.6 | 34.5 | 25.1 | 23.9 |
| Pax2     | 0.0  | 0.0  | 0.0  | 0.0  | 0.0  | 0.0  | 0.0  | 0.0  | 0.0  | 0.0  | 0.0  | 0.0  |
| Pax3     | 1.2  | 0.5  | 0.3  | 2.2  | 1.0  | 1.7  | 0.6  | 0.5  | 0.5  | 0.3  | 0.3  | 0.3  |
| Pax6     | 0.1  | 0.1  | 0.1  | 0.1  | 0.1  | 0.0  | 0.1  | 0.0  | 0.1  | 0.0  | 0.0  | 0.0  |
| Pax9     | 0.0  | 0.0  | 0.0  | 0.2  | 0.0  | 0.0  | 0.0  | 0.0  | 0.0  | 0.0  | 0.0  | 0.0  |
| Paxbp1   | 5.2  | 6.2  | 6.8  | 5.3  | 5.6  | 5.4  | 5.2  | 5.6  | 6.2  | 6.4  | 6.7  | 6.2  |
| Paxip1   | 2.1  | 2.3  | 2.5  | 2.1  | 2.2  | 2.0  | 2.5  | 2.5  | 2.1  | 1.9  | 2.2  | 2.0  |
| Pbdc1    | 5.8  | 6.0  | 6.7  | 6.7  | 7.4  | 6.4  | 7.4  | 6.9  | 5.3  | 6.8  | 7.4  | 6.8  |
| Pbk      | 2.5  | 4.2  | 6.0  | 0.9  | 6.2  | 0.6  | 7.2  | 2.5  | 5.5  | 2.7  | 4.4  | 2.9  |
| Pbld1    | 0.1  | 0.0  | 0.0  | 0.1  | 0.0  | 0.0  | 0.0  | 0.0  | 0.0  | 0.0  | 0.1  | 0.0  |
| Pbld2    | 0.8  | 1.4  | 1.0  | 0.7  | 0.7  | 0.9  | 0.7  | 0.9  | 0.6  | 0.7  | 0.9  | 0.8  |
| Pbp2     | 2.0  | 0.6  | 0.4  | 1.1  | 1.2  | 1.6  | 3.0  | 0.4  | 1.8  | 2.0  | 1.2  | 1.6  |
| Pbrm1    | 10.9 | 11.4 | 12.1 | 10.7 | 11.1 | 12.2 | 11.4 | 13.1 | 11.8 | 12.0 | 14.0 | 13.3 |
| Pbx1     | 9.2  | 12.2 | 14.8 | 11.4 | 10.3 | 9.3  | 12.6 | 13.7 | 11.9 | 11.2 | 11.7 | 13.2 |
| Pbx2     | 7.4  | 8.3  | 8.9  | 7.1  | 7.6  | 8.0  | 7.2  | 7.2  | 7.7  | 7.9  | 7.4  | 8.2  |
| Pbx3     | 3.6  | 4.4  | 5.0  | 4.0  | 4.3  | 3.9  | 5.7  | 5.3  | 5.4  | 4.7  | 5.2  | 5.1  |
| Pbx4     | 0.8  | 1.1  | 1.2  | 0.8  | 1.1  | 1.4  | 1.0  | 1.0  | 0.9  | 0.9  | 1.3  | 1.1  |
| Pbxip1   | 31.3 | 28.0 | 32.3 | 27.8 | 32.6 | 29.3 | 34.2 | 35.6 | 38.2 | 31.6 | 33.5 | 34.7 |
| Pcbd1    | 2.5  | 2.3  | 2.2  | 2.2  | 1.2  | 2.3  | 0.6  | 0.9  | 1.2  | 1.4  | 1.6  | 1.6  |
| Pcbd2    | 20.3 | 18.1 | 18.3 | 20.7 | 17.9 | 21.9 | 17.1 | 22.0 | 16.3 | 18.4 | 20.2 | 18.1 |
| Pcbp1    | 20.6 | 21.8 | 21.2 | 24.7 | 24.6 | 23.9 | 24.0 | 25.6 | 22.0 | 26.9 | 22.4 | 22.2 |
| Pcbp2    | 7.3  | 7.2  | 8.4  | 6.8  | 7.9  | 7.5  | 9.3  | 9.1  | 9.4  | 10.2 | 8.4  | 8.6  |
| Pcbp3    | 1.6  | 1.7  | 2.6  | 2.0  | 1.7  | 2.4  | 2.2  | 1.6  | 1.7  | 1.4  | 1.6  | 1.5  |
| Pcbp4    | 23.0 | 22.8 | 18.7 | 22.7 | 19.2 | 23.5 | 22.4 | 23.8 | 23.2 | 17.0 | 20.3 | 17.1 |
| Pcca     | 5.5  | 7.9  | 7.2  | 5.3  | 6.0  | 5.3  | 5.4  | 6.5  | 6.1  | 6.2  | 5.8  | 6.0  |
| Pccb     | 11.5 | 11.9 | 12.0 | 14.0 | 11.4 | 11.7 | 12.2 | 13.9 | 10.0 | 9.5  | 11.6 | 12.2 |
| Pcdh1    | 1.5  | 1.5  | 1.4  | 1.3  | 1.9  | 2.2  | 3.1  | 1.9  | 2.8  | 1.4  | 1.4  | 1.6  |
| Pcdh10   | 0.0  | 0.0  | 0.0  | 0.0  | 0.0  | 0.1  | 0.0  | 0.0  | 0.0  | 0.0  | 0.0  | 0.0  |
| Pcdh11x  | 0.1  | 0.1  | 0.0  | 0.1  | 0.0  | 0.0  | 0.0  | 0.0  | 0.2  | 0.4  | 0.3  | 0.2  |
| Pcdh12   | 0.3  | 0.1  | 0.2  | 0.1  | 0.3  | 0.0  | 0.4  | 0.4  | 0.4  | 0.0  | 0.0  | 0.1  |
| Pcdh15   | 0.0  | 0.0  | 0.0  | 0.0  | 0.0  | 0.0  | 0.0  | 0.0  | 0.0  | 0.0  | 0.0  | 0.0  |
| Pcdh17   | 0.0  | 0.0  | 0.0  | 0.0  | 0.0  | 0.0  | 0.0  | 0.0  | 0.0  | 0.0  | 0.0  | 0.0  |
| Pcdh18   | 9.3  | 8.5  | 7.4  | 10.4 | 9.6  | 8.3  | 14.1 | 12.3 | 13.8 | 6.7  | 11.5 | 8.1  |
| Pcdh19   | 0.5  | 0.9  | 1.5  | 0.4  | 1.4  | 0.6  | 2.8  | 3.3  | 2.8  | 1.0  | 1.3  | 1.2  |
| Pcdh20   | 0.0  | 0.0  | 0.0  | 0.0  | 0.0  | 0.0  | 0.0  | 0.0  | 0.0  | 0.0  | 0.0  | 0.0  |
| Pcdh7    | 13.8 | 13.4 | 13.1 | 12.2 | 16.1 | 8.7  | 20.3 | 14.1 | 21.7 | 24.0 | 20.7 | 22.1 |
| Pcdh8    | 0.0  | 0.0  | 0.0  | 0.0  | 0.0  | 0.0  | 0.0  | 0.0  | 0.0  | 0.0  | 0.0  | 0.0  |
| Pcdh9    | 6.2  | 4.7  | 5.1  | 7.3  | 4.9  | 7.6  | 7.4  | 3.5  | 6.8  | 3.2  | 4.8  | 7.1  |
| Pcdha1   | 0.0  | 0.0  | 0.0  | 0.1  | 0.0  | 0.0  | 0.0  | 0.0  | 0.0  | 0.0  | 0.0  | 0.0  |
| Pcdha10  | 0.3  | 0.1  | 0.1  | 0.5  | 0.2  | 0.5  | 0.2  | 0.2  | 0.4  | 0.2  | 0.3  | 0.2  |
| Pcdha11  | 0.0  | 0.0  | 0.0  | 0.1  | 0.0  | 0.1  | 0.0  | 0.0  | 0.0  | 0.0  | 0.0  | 0.0  |
| Pcdha12  | 0.0  | 0.0  | 0.1  | 0.1  | 0.1  | 0.0  | 0.0  | 0.0  | 0.0  | 0.1  | 0.0  | 0.0  |
| Pcdha2   | 0.0  | 0.0  | 0.0  | 0.0  | 0.0  | 0.0  | 0.0  | 0.0  | 0.0  | 0.0  | 0.0  | 0.0  |
| Pcdha3   | 0.0  | 0.0  | 0.0  | 0.0  | 0.0  | 0.0  | 0.0  | 0.0  | 0.0  | 0.0  | 0.0  | 0.0  |
| Pcdha4   | 0.0  | 0.0  | 0.1  | 0.0  | 0.0  | 0.0  | 0.1  | 0.1  | 0.0  | 0.0  | 0.1  | 0.0  |
| Pcdha4-g | 0.1  | 0.1  | 0.0  | 0.0  | 0.1  | 0.2  | 0.0  | 0.0  | 0.1  | 0.0  | 0.0  | 0.0  |
| Pcdha5   | 0.0  | 0.0  | 0.0  | 0.0  | 0.0  | 0.0  | 0.0  | 0.0  | 0.0  | 0.0  | 0.1  | 0.0  |
| Pcdha6   | 0.0  | 0.0  | 0.0  | 0.0  | 0.0  | 0.0  | 0.0  | 0.0  | 0.0  | 0.0  | 0.0  | 0.0  |
| Pcdha7   | 0.0  | 0.0  | 0.0  | 0.0  | 0.0  | 0.0  | 0.0  | 0.0  | 0.0  | 0.0  | 0.0  | 0.0  |
| Pcdha8   | 0.1  | 0.0  | 0.1  | 0.0  | 0.0  | 0.0  | 0.0  | 0.0  | 0.1  | 0.0  | 0.0  | 0.1  |
| Pcdha9   | 0.0  | 0.1  | 0.0  | 0.0  | 0.1  | 0.0  | 0.0  | 0.1  | 0.0  | 0.0  | 0.0  | 0.0  |
| Pcdhac1  | 0.0  | 0.0  | 0.0  | 0.0  | 0.0  | 0.0  | 0.0  | 0.0  | 0.0  | 0.0  | 0.0  | 0.0  |
| Pcdhac2  | 0.1  | 0.0  | 0.0  | 0.2  | 0.1  | 0.2  | 0.2  | 0.1  | 0.1  | 0.2  | 0.1  | 0.1  |

Online Table 1

|          |      |      |      |      |      |      |      |      |      |      |      |      |
|----------|------|------|------|------|------|------|------|------|------|------|------|------|
| Pcdhb10  | 0.0  | 0.1  | 0.1  | 0.0  | 0.0  | 0.0  | 0.0  | 0.0  | 0.0  | 0.0  | 0.0  | 0.1  |
| Pcdhb11  | 0.1  | 0.2  | 0.1  | 0.1  | 0.1  | 0.0  | 0.1  | 0.2  | 0.2  | 0.1  | 0.2  | 0.1  |
| Pcdhb12  | 0.1  | 0.2  | 0.2  | 0.0  | 0.1  | 0.0  | 0.1  | 0.2  | 0.2  | 0.0  | 0.1  | 0.0  |
| Pcdhb13  | 0.1  | 0.0  | 0.2  | 0.0  | 0.1  | 0.0  | 0.1  | 0.2  | 0.0  | 0.1  | 0.0  | 0.1  |
| Pcdhb14  | 0.6  | 1.0  | 1.6  | 0.8  | 1.0  | 1.0  | 1.2  | 1.8  | 1.5  | 1.0  | 1.1  | 1.2  |
| Pcdhb15  | 0.1  | 0.2  | 0.3  | 0.2  | 0.1  | 0.1  | 0.3  | 0.4  | 0.3  | 0.3  | 0.2  | 0.3  |
| Pcdhb16  | 0.4  | 0.8  | 1.3  | 0.4  | 0.9  | 0.5  | 0.9  | 1.6  | 1.2  | 1.1  | 1.1  | 1.0  |
| Pcdhb17  | 3.4  | 3.5  | 4.4  | 3.2  | 3.4  | 2.6  | 4.0  | 5.3  | 3.8  | 3.3  | 3.8  | 3.7  |
| Pcdhb18  | 0.3  | 0.5  | 0.6  | 0.5  | 0.4  | 0.5  | 0.5  | 0.6  | 0.5  | 0.5  | 0.4  | 0.5  |
| Pcdhb19  | 0.4  | 0.6  | 1.0  | 0.6  | 0.5  | 0.5  | 0.7  | 1.1  | 0.9  | 0.9  | 0.8  | 0.7  |
| Pcdhb2   | 0.1  | 0.3  | 0.3  | 0.1  | 0.1  | 0.1  | 0.3  | 0.3  | 0.3  | 0.1  | 0.2  | 0.3  |
| Pcdhb20  | 0.3  | 0.7  | 0.9  | 0.5  | 0.6  | 0.4  | 0.4  | 1.2  | 0.9  | 0.8  | 0.7  | 0.6  |
| Pcdhb21  | 0.7  | 0.7  | 0.8  | 0.5  | 0.6  | 0.5  | 0.8  | 1.2  | 1.2  | 0.6  | 0.7  | 0.9  |
| Pcdhb22  | 3.7  | 4.3  | 4.1  | 4.3  | 4.3  | 4.2  | 4.3  | 5.5  | 5.7  | 5.5  | 4.9  | 5.1  |
| Pcdhb3   | 0.1  | 0.1  | 0.2  | 0.2  | 0.1  | 0.2  | 0.3  | 0.3  | 0.1  | 0.2  | 0.1  | 0.2  |
| Pcdhb4   | 0.1  | 0.1  | 0.2  | 0.1  | 0.1  | 0.2  | 0.2  | 0.2  | 0.1  | 0.1  | 0.1  | 0.1  |
| Pcdhb5   | 0.4  | 0.4  | 0.7  | 0.3  | 0.5  | 0.2  | 0.6  | 0.8  | 0.8  | 0.6  | 0.5  | 0.6  |
| Pcdhb7   | 0.2  | 0.2  | 0.4  | 0.0  | 0.1  | 0.2  | 0.3  | 0.5  | 0.3  | 0.3  | 0.2  | 0.2  |
| Pcdhb8   | 0.0  | 0.0  | 0.1  | 0.0  | 0.0  | 0.0  | 0.0  | 0.1  | 0.0  | 0.0  | 0.0  | 0.0  |
| Pcdhb9   | 0.1  | 0.2  | 0.3  | 0.0  | 0.1  | 0.1  | 0.3  | 0.4  | 0.3  | 0.2  | 0.0  | 0.2  |
| Pcdhga1  | 0.8  | 0.7  | 0.7  | 0.9  | 0.8  | 1.0  | 0.9  | 0.8  | 0.6  | 0.7  | 0.5  | 0.9  |
| Pcdhga10 | 3.1  | 2.9  | 3.0  | 2.9  | 3.2  | 4.4  | 5.4  | 4.6  | 4.2  | 4.1  | 3.5  | 4.3  |
| Pcdhga11 | 0.9  | 1.0  | 1.2  | 1.0  | 1.1  | 1.1  | 1.4  | 1.5  | 1.0  | 1.0  | 1.1  | 0.9  |
| Pcdhga12 | 0.7  | 0.5  | 0.7  | 0.4  | 0.8  | 0.6  | 0.8  | 0.8  | 0.5  | 0.5  | 0.5  | 0.4  |
| Pcdhga2  | 1.1  | 1.1  | 1.2  | 0.6  | 0.9  | 1.2  | 1.2  | 1.4  | 1.0  | 1.2  | 1.0  | 1.1  |
| Pcdhga3  | 0.7  | 0.9  | 1.2  | 0.7  | 0.7  | 0.8  | 1.2  | 2.3  | 1.4  | 1.2  | 1.3  | 1.1  |
| Pcdhga4  | 0.8  | 1.2  | 1.5  | 0.8  | 1.1  | 1.0  | 1.2  | 1.7  | 1.2  | 1.4  | 0.8  | 1.2  |
| Pcdhga5  | 1.2  | 2.3  | 2.9  | 0.8  | 1.6  | 1.6  | 2.2  | 3.4  | 2.5  | 1.8  | 1.5  | 2.0  |
| Pcdhga6  | 0.7  | 0.9  | 1.5  | 0.7  | 1.1  | 0.8  | 1.3  | 2.1  | 2.1  | 1.2  | 1.2  | 1.6  |
| Pcdhga7  | 2.5  | 3.0  | 3.3  | 2.6  | 2.9  | 2.4  | 3.4  | 3.0  | 3.8  | 3.5  | 3.2  | 3.1  |
| Pcdhga8  | 1.8  | 1.5  | 1.4  | 2.2  | 1.4  | 2.1  | 2.0  | 2.2  | 1.6  | 1.5  | 2.1  | 1.2  |
| Pcdhga9  | 0.6  | 0.4  | 0.6  | 0.6  | 0.5  | 0.5  | 0.7  | 0.7  | 0.4  | 0.7  | 0.6  | 0.5  |
| Pcdhgb1  | 0.5  | 1.1  | 1.1  | 0.6  | 0.6  | 0.8  | 1.2  | 1.6  | 1.0  | 0.8  | 0.9  | 0.8  |
| Pcdhgb2  | 4.1  | 4.6  | 4.9  | 2.9  | 4.2  | 4.6  | 4.2  | 5.2  | 4.8  | 3.6  | 4.2  | 4.8  |
| Pcdhgb4  | 3.5  | 3.6  | 3.2  | 4.3  | 3.4  | 4.8  | 3.8  | 3.1  | 3.8  | 3.0  | 3.7  | 3.3  |
| Pcdhgb5  | 1.1  | 1.4  | 1.6  | 1.0  | 1.2  | 1.0  | 2.1  | 2.3  | 1.6  | 1.3  | 1.7  | 1.7  |
| Pcdhgb6  | 1.6  | 1.8  | 2.9  | 2.0  | 1.8  | 1.5  | 2.6  | 3.9  | 3.1  | 2.8  | 2.4  | 2.3  |
| Pcdhgb7  | 0.6  | 0.8  | 1.0  | 0.7  | 1.0  | 1.0  | 1.3  | 1.4  | 1.0  | 1.1  | 0.8  | 1.0  |
| Pcdhgb8  | 0.4  | 0.3  | 0.3  | 0.2  | 0.3  | 0.3  | 0.5  | 0.4  | 0.2  | 0.2  | 0.4  | 0.3  |
| Pcdhgc3  | 27.2 | 31.1 | 39.8 | 33.5 | 48.4 | 36.0 | 54.3 | 52.0 | 50.0 | 35.4 | 33.1 | 39.5 |
| Pcdhgc4  | 0.4  | 0.7  | 1.0  | 0.3  | 1.1  | 0.4  | 1.0  | 1.4  | 1.0  | 0.7  | 0.5  | 0.6  |
| Pcdhgc5  | 3.7  | 4.2  | 6.3  | 3.6  | 6.4  | 4.2  | 7.6  | 6.3  | 7.3  | 6.9  | 5.0  | 6.2  |
| Pced1a   | 4.3  | 5.2  | 5.4  | 5.0  | 5.4  | 5.4  | 5.0  | 4.9  | 5.1  | 5.3  | 4.8  | 4.9  |
| Pced1b   | 0.5  | 0.4  | 0.4  | 1.0  | 0.6  | 0.7  | 0.3  | 0.5  | 0.2  | 0.3  | 0.3  | 0.4  |
| Pcf11    | 5.5  | 6.3  | 7.7  | 5.9  | 6.6  | 6.1  | 6.9  | 6.1  | 5.9  | 7.8  | 6.7  | 7.3  |
| Pcgf1    | 5.4  | 4.5  | 4.2  | 3.6  | 4.4  | 4.7  | 3.8  | 3.5  | 4.3  | 3.8  | 4.8  | 4.1  |
| Pcgf2    | 0.5  | 0.9  | 1.3  | 1.0  | 0.5  | 1.2  | 1.0  | 1.4  | 1.1  | 0.6  | 1.0  | 1.1  |
| Pcgf3    | 20.2 | 19.2 | 21.7 | 23.1 | 19.7 | 24.1 | 20.5 | 20.8 | 18.4 | 18.7 | 24.3 | 20.6 |
| Pcgf5    | 11.4 | 11.6 | 8.0  | 12.5 | 9.5  | 10.3 | 7.8  | 5.4  | 6.6  | 7.5  | 9.1  | 9.0  |
| Pcgf6    | 2.8  | 2.9  | 2.4  | 2.7  | 2.2  | 2.7  | 2.9  | 2.7  | 2.3  | 2.6  | 2.8  | 2.3  |
| Pcid2    | 5.5  | 6.6  | 6.4  | 6.3  | 5.8  | 6.5  | 5.9  | 6.4  | 5.8  | 5.9  | 6.1  | 5.9  |
| Pcif1    | 2.9  | 3.0  | 3.7  | 2.8  | 3.1  | 2.6  | 3.5  | 4.5  | 3.7  | 2.8  | 2.6  | 3.0  |
| Pck2     | 23.9 | 17.7 | 16.3 | 19.3 | 14.6 | 24.8 | 20.0 | 29.2 | 26.5 | 17.6 | 22.3 | 15.6 |
| Pclo     | 0.0  | 0.0  | 0.0  | 0.0  | 0.0  | 0.0  | 0.0  | 0.0  | 0.0  | 0.0  | 0.0  | 0.0  |
| Pcm1     | 9.3  | 9.8  | 10.9 | 10.0 | 8.5  | 9.4  | 8.4  | 8.9  | 7.9  | 9.0  | 10.6 | 11.0 |
| Pcmt1    | 21.9 | 19.4 | 16.5 | 21.0 | 20.9 | 21.8 | 18.8 | 17.5 | 19.4 | 18.8 | 21.5 | 18.3 |
| Pcmt1d1  | 17.1 | 14.5 | 17.3 | 24.1 | 13.5 | 25.6 | 15.6 | 13.3 | 11.6 | 15.6 | 21.0 | 19.7 |

Online Table 1

|         |       |       |       |       |       |       |       |       |       |       |       |       |
|---------|-------|-------|-------|-------|-------|-------|-------|-------|-------|-------|-------|-------|
| Pcmdt2  | 8.2   | 8.9   | 10.3  | 8.6   | 8.0   | 10.2  | 8.2   | 8.7   | 8.7   | 9.6   | 9.4   | 12.2  |
| Pcna    | 38.7  | 44.9  | 47.2  | 39.0  | 68.1  | 26.1  | 57.9  | 40.5  | 42.6  | 37.8  | 46.3  | 37.8  |
| Pcnp    | 47.1  | 43.1  | 50.4  | 64.9  | 46.9  | 61.8  | 47.8  | 43.1  | 43.4  | 49.4  | 52.9  | 58.4  |
| Pcnt    | 2.3   | 2.8   | 3.6   | 2.1   | 3.1   | 2.1   | 3.7   | 2.8   | 2.9   | 2.3   | 2.5   | 2.5   |
| Pcnx    | 6.8   | 8.0   | 7.2   | 6.5   | 7.0   | 8.8   | 6.9   | 6.1   | 6.4   | 4.2   | 5.0   | 4.8   |
| Pcnx12  | 0.0   | 0.0   | 0.0   | 0.0   | 0.0   | 0.0   | 0.0   | 0.0   | 0.0   | 0.0   | 0.0   | 0.0   |
| Pcnx13  | 3.9   | 4.5   | 4.3   | 3.6   | 4.7   | 4.3   | 4.8   | 5.1   | 5.5   | 4.4   | 3.8   | 3.2   |
| Pcnx14  | 4.2   | 5.0   | 3.9   | 4.4   | 3.8   | 4.7   | 4.0   | 3.3   | 3.8   | 4.3   | 3.7   | 4.6   |
| Pcolce  | 167.6 | 180.9 | 190.5 | 179.7 | 165.7 | 194.0 | 220.8 | 229.7 | 236.3 | 160.5 | 182.5 | 157.8 |
| Pcolce2 | 32.4  | 35.4  | 41.3  | 27.2  | 46.2  | 34.5  | 82.0  | 54.9  | 55.9  | 44.3  | 46.5  | 66.8  |
| Pcp2    | 0.0   | 0.2   | 0.1   | 0.1   | 0.1   | 0.1   | 0.0   | 0.0   | 0.2   | 0.2   | 0.2   | 0.0   |
| Pcp411  | 0.0   | 0.0   | 0.0   | 0.5   | 0.6   | 0.0   | 0.1   | 0.2   | 0.1   | 0.1   | 0.0   | 0.0   |
| Pcsk1   | 0.0   | 0.0   | 0.0   | 0.6   | 0.5   | 0.0   | 0.0   | 0.0   | 0.0   | 0.0   | 0.0   | 0.0   |
| Pcsk2   | 0.0   | 0.0   | 0.0   | 0.0   | 0.0   | 0.0   | 0.0   | 0.0   | 0.0   | 0.0   | 0.0   | 0.0   |
| Pcsk4   | 0.1   | 0.0   | 0.0   | 0.1   | 0.1   | 0.2   | 0.0   | 0.0   | 0.0   | 0.0   | 0.0   | 0.0   |
| Pcsk5   | 15.6  | 15.4  | 19.0  | 7.8   | 10.4  | 5.4   | 9.3   | 7.8   | 8.5   | 16.8  | 12.7  | 16.3  |
| Pcsk6   | 97.4  | 137.5 | 122.5 | 105.7 | 86.9  | 154.1 | 87.1  | 81.9  | 78.5  | 44.6  | 51.9  | 40.6  |
| Pcsk7   | 5.9   | 6.9   | 6.1   | 6.1   | 6.6   | 5.4   | 6.4   | 5.8   | 7.0   | 5.3   | 5.5   | 5.6   |
| Pcsk9   | 0.2   | 0.5   | 0.4   | 0.0   | 0.1   | 0.1   | 0.2   | 1.4   | 0.3   | 0.2   | 0.4   | 0.1   |
| Pctp    | 2.3   | 1.8   | 1.6   | 3.9   | 4.3   | 1.7   | 1.8   | 1.4   | 1.4   | 2.5   | 1.9   | 1.2   |
| Pcx     | 13.5  | 12.2  | 14.0  | 11.0  | 11.9  | 10.8  | 9.0   | 9.3   | 7.7   | 8.9   | 7.3   | 7.0   |
| Pcyox1  | 53.5  | 39.8  | 37.6  | 56.7  | 45.8  | 60.4  | 38.9  | 37.1  | 35.6  | 42.2  | 41.2  | 40.1  |
| Pcyox11 | 2.5   | 3.4   | 3.6   | 2.5   | 3.4   | 2.7   | 3.9   | 2.8   | 3.2   | 2.7   | 3.1   | 2.6   |
| Pcyt1a  | 16.6  | 16.6  | 14.9  | 19.8  | 16.3  | 16.5  | 17.0  | 15.9  | 15.7  | 15.2  | 16.2  | 18.3  |
| Pcyt1b  | 2.3   | 2.6   | 2.3   | 2.5   | 2.4   | 3.0   | 3.7   | 4.0   | 3.1   | 1.6   | 3.2   | 1.8   |
| Pcyt2   | 11.9  | 14.4  | 12.4  | 7.2   | 10.6  | 10.4  | 16.6  | 17.4  | 15.0  | 9.4   | 17.0  | 8.5   |
| Pdap1   | 39.3  | 33.2  | 40.4  | 51.3  | 35.0  | 41.8  | 47.7  | 41.1  | 31.4  | 36.5  | 48.2  | 44.7  |
| Pdcd10  | 22.9  | 27.3  | 26.7  | 25.9  | 26.4  | 23.2  | 24.9  | 24.9  | 26.0  | 27.1  | 30.6  | 32.2  |
| Pdcd11  | 7.1   | 6.5   | 6.3   | 7.6   | 7.1   | 6.8   | 7.0   | 7.4   | 5.8   | 7.1   | 7.3   | 6.8   |
| Pdcd2   | 14.0  | 9.9   | 9.3   | 13.1  | 8.9   | 13.9  | 9.8   | 9.8   | 9.8   | 13.6  | 11.3  | 11.1  |
| Pdcd2l  | 8.5   | 7.0   | 6.7   | 8.3   | 7.3   | 8.0   | 7.1   | 6.6   | 6.9   | 7.0   | 6.1   | 7.2   |
| Pdcd4   | 27.6  | 44.4  | 54.8  | 24.6  | 31.4  | 24.6  | 38.4  | 60.5  | 50.7  | 39.6  | 42.0  | 58.2  |
| Pdcd5   | 85.0  | 80.0  | 79.0  | 92.6  | 60.0  | 83.9  | 74.1  | 84.1  | 66.3  | 70.9  | 85.8  | 81.4  |
| Pdcd6   | 37.3  | 33.4  | 33.2  | 37.6  | 31.9  | 34.9  | 35.0  | 35.6  | 31.2  | 35.0  | 39.2  | 38.2  |
| Pdcd6ip | 21.9  | 23.5  | 23.0  | 24.2  | 26.3  | 23.3  | 26.7  | 23.2  | 25.5  | 24.1  | 27.0  | 24.6  |
| Pdcd7   | 3.0   | 3.3   | 3.5   | 2.5   | 2.7   | 3.1   | 2.9   | 3.0   | 3.4   | 3.4   | 2.9   | 2.6   |
| Pdcl    | 10.0  | 10.2  | 12.4  | 13.4  | 10.6  | 12.3  | 12.2  | 12.8  | 11.6  | 12.6  | 16.0  | 14.4  |
| Pdcl3   | 31.8  | 28.3  | 27.5  | 38.2  | 27.8  | 28.8  | 34.4  | 27.0  | 31.0  | 27.6  | 36.2  | 33.1  |
| Pddc1   | 12.2  | 12.6  | 10.4  | 11.7  | 11.8  | 12.3  | 9.9   | 10.9  | 12.6  | 16.3  | 11.8  | 12.0  |
| Pde10a  | 2.4   | 2.3   | 2.3   | 2.9   | 2.3   | 2.4   | 2.8   | 2.5   | 2.3   | 2.0   | 2.6   | 2.4   |
| Pde11a  | 0.0   | 0.0   | 0.0   | 0.0   | 0.0   | 0.0   | 0.0   | 0.0   | 0.0   | 0.0   | 0.0   | 0.0   |
| Pde12   | 6.6   | 7.4   | 5.6   | 8.1   | 7.2   | 6.6   | 7.2   | 5.8   | 6.8   | 7.1   | 7.1   | 6.8   |
| Pde1a   | 16.1  | 43.9  | 65.2  | 13.5  | 26.5  | 14.4  | 35.8  | 64.0  | 40.5  | 20.9  | 21.8  | 30.9  |
| Pde1b   | 1.2   | 1.2   | 0.8   | 1.6   | 2.1   | 1.7   | 0.8   | 0.5   | 0.7   | 0.8   | 0.5   | 0.8   |
| Pde1c   | 0.2   | 0.3   | 0.1   | 0.3   | 0.2   | 0.2   | 0.2   | 0.1   | 0.1   | 0.1   | 0.1   | 0.1   |
| Pde2a   | 3.1   | 2.8   | 2.0   | 4.7   | 3.5   | 4.7   | 3.8   | 1.9   | 3.8   | 2.3   | 1.8   | 2.5   |
| Pde3a   | 3.7   | 7.4   | 8.4   | 3.2   | 4.0   | 3.3   | 5.7   | 6.5   | 7.8   | 4.6   | 5.1   | 7.6   |
| Pde3b   | 2.2   | 2.6   | 3.6   | 1.3   | 1.7   | 1.1   | 3.4   | 3.6   | 3.7   | 4.0   | 4.5   | 5.4   |
| Pde4a   | 1.1   | 1.4   | 1.5   | 1.6   | 1.4   | 1.7   | 1.6   | 1.2   | 1.5   | 1.4   | 1.3   | 1.2   |
| Pde4b   | 5.2   | 6.3   | 6.5   | 4.3   | 4.4   | 5.6   | 3.6   | 3.7   | 3.2   | 4.1   | 3.9   | 5.3   |
| Pde4c   | 0.0   | 0.0   | 0.0   | 0.0   | 0.1   | 0.1   | 0.0   | 0.0   | 0.0   | 0.0   | 0.0   | 0.0   |
| Pde4d   | 0.8   | 1.0   | 1.1   | 1.1   | 0.9   | 1.4   | 1.1   | 1.0   | 0.9   | 1.3   | 1.3   | 1.2   |
| Pde4dip | 27.8  | 22.2  | 18.9  | 27.8  | 23.0  | 26.2  | 24.6  | 19.3  | 20.6  | 24.3  | 27.7  | 26.9  |
| Pde5a   | 2.6   | 3.6   | 3.5   | 1.7   | 2.5   | 1.9   | 2.5   | 3.0   | 3.7   | 3.6   | 3.6   | 4.3   |
| Pde6a   | 0.0   | 0.0   | 0.0   | 0.0   | 0.0   | 0.0   | 0.0   | 0.0   | 0.0   | 0.0   | 0.0   | 0.0   |
| Pde6b   | 0.0   | 0.0   | 0.0   | 0.0   | 0.0   | 0.0   | 0.0   | 0.0   | 0.0   | 0.0   | 0.0   | 0.0   |
| Pde6d   | 14.9  | 14.6  | 16.2  | 14.1  | 14.4  | 15.5  | 15.1  | 14.4  | 15.4  | 12.9  | 15.0  | 14.6  |

Online Table 1

|          |       |       |       |       |       |       |       |       |       |       |       |       |
|----------|-------|-------|-------|-------|-------|-------|-------|-------|-------|-------|-------|-------|
| Pde6g    | 0.4   | 0.1   | 0.3   | 0.4   | 0.2   | 0.2   | 0.1   | 0.0   | 0.1   | 0.2   | 0.1   | 0.2   |
| Pde6h    | 0.3   | 0.3   | 0.1   | 0.0   | 0.0   | 0.0   | 0.0   | 0.0   | 0.0   | 0.2   | 0.1   | 0.1   |
| Pde7a    | 6.8   | 7.3   | 8.9   | 5.7   | 7.7   | 6.3   | 8.2   | 10.9  | 10.0  | 6.9   | 8.5   | 8.6   |
| Pde7b    | 0.8   | 0.4   | 0.3   | 0.5   | 0.3   | 0.6   | 0.2   | 0.2   | 0.1   | 0.4   | 0.3   | 0.3   |
| Pde8a    | 5.3   | 5.8   | 7.4   | 6.6   | 7.5   | 6.0   | 6.9   | 6.0   | 5.3   | 3.6   | 5.5   | 5.3   |
| Pde8b    | 0.5   | 0.5   | 0.2   | 0.5   | 0.4   | 0.4   | 0.3   | 0.1   | 0.3   | 0.6   | 0.6   | 0.4   |
| Pde9a    | 0.1   | 0.2   | 0.5   | 0.1   | 0.1   | 0.1   | 0.1   | 1.4   | 0.1   | 0.1   | 0.0   | 0.1   |
| Pdf      | 6.5   | 6.8   | 5.9   | 8.5   | 7.4   | 8.2   | 5.4   | 6.5   | 7.6   | 8.1   | 6.7   | 7.2   |
| Pdgfa    | 40.2  | 34.2  | 26.0  | 33.4  | 25.1  | 43.8  | 29.8  | 28.2  | 30.9  | 30.6  | 36.3  | 27.5  |
| Pdgfb    | 1.4   | 0.3   | 0.5   | 2.8   | 7.8   | 0.2   | 1.1   | 1.0   | 0.9   | 0.6   | 0.3   | 0.4   |
| Pdgfc    | 1.1   | 0.7   | 0.6   | 1.0   | 0.4   | 1.1   | 0.7   | 0.6   | 1.1   | 1.4   | 1.2   | 1.5   |
| Pdgfd    | 26.5  | 18.4  | 16.0  | 25.3  | 13.1  | 19.2  | 12.6  | 6.4   | 8.8   | 9.7   | 10.7  | 11.7  |
| Pdgfra   | 28.7  | 51.2  | 86.5  | 31.9  | 58.8  | 42.4  | 54.4  | 49.1  | 43.4  | 46.5  | 35.0  | 49.3  |
| Pdgfrb   | 56.6  | 77.8  | 83.8  | 50.8  | 71.3  | 56.6  | 101.9 | 89.3  | 114.4 | 76.2  | 74.4  | 93.2  |
| Pdgfrl   | 0.6   | 1.3   | 3.3   | 0.7   | 1.0   | 1.1   | 1.8   | 4.5   | 2.8   | 2.2   | 2.4   | 2.5   |
| Pdha1    | 72.9  | 66.4  | 63.5  | 68.6  | 58.8  | 65.4  | 71.8  | 70.8  | 70.6  | 73.3  | 81.7  | 83.4  |
| Pdhb     | 42.3  | 42.1  | 33.0  | 40.1  | 34.1  | 36.7  | 30.8  | 33.7  | 36.7  | 34.6  | 37.3  | 33.3  |
| Pdhx     | 7.8   | 8.8   | 8.1   | 7.7   | 7.2   | 6.7   | 7.7   | 7.6   | 7.1   | 7.4   | 7.9   | 6.5   |
| Pdia2    | 0.0   | 0.0   | 0.1   | 0.0   | 0.0   | 0.0   | 0.0   | 0.0   | 0.0   | 0.1   | 0.1   | 0.0   |
| Pdia3    | 296.6 | 257.4 | 258.4 | 304.0 | 258.2 | 260.1 | 248.9 | 260.0 | 244.2 | 276.1 | 304.5 | 309.4 |
| Pdia4    | 181.1 | 158.4 | 157.9 | 193.6 | 136.2 | 167.6 | 161.9 | 173.1 | 152.0 | 178.5 | 189.3 | 176.7 |
| Pdia5    | 11.1  | 8.8   | 10.1  | 10.3  | 11.7  | 10.0  | 12.3  | 12.9  | 11.1  | 11.1  | 12.1  | 13.3  |
| Pdia6    | 237.5 | 221.9 | 207.3 | 241.5 | 199.5 | 214.9 | 213.0 | 234.1 | 226.6 | 220.1 | 227.8 | 216.3 |
| Pdik1l   | 2.1   | 2.0   | 2.1   | 2.4   | 2.1   | 2.2   | 2.1   | 1.7   | 1.7   | 1.9   | 1.7   | 2.1   |
| Pdk1     | 7.2   | 7.1   | 6.7   | 6.7   | 7.5   | 8.2   | 6.9   | 4.8   | 6.9   | 6.7   | 5.8   | 8.4   |
| Pdk2     | 2.6   | 3.2   | 3.5   | 2.9   | 2.6   | 3.5   | 3.2   | 3.5   | 3.2   | 3.5   | 2.9   | 3.0   |
| Pdk3     | 16.5  | 20.1  | 18.4  | 12.5  | 16.3  | 13.1  | 17.1  | 20.4  | 19.8  | 19.5  | 21.8  | 18.5  |
| Pdk4     | 5.7   | 6.5   | 7.1   | 8.4   | 7.9   | 8.8   | 7.5   | 2.8   | 5.5   | 7.2   | 6.2   | 7.7   |
| Pdlim1   | 81.9  | 70.3  | 55.4  | 127.5 | 71.1  | 110.9 | 71.1  | 41.9  | 54.0  | 75.2  | 75.6  | 70.6  |
| Pdlim2   | 41.3  | 58.0  | 59.0  | 42.0  | 37.6  | 49.6  | 56.3  | 73.7  | 58.4  | 48.1  | 49.9  | 46.8  |
| Pdlim3   | 15.1  | 52.7  | 93.4  | 7.5   | 38.1  | 3.4   | 28.9  | 64.5  | 51.4  | 43.6  | 31.9  | 73.5  |
| Pdlim4   | 0.3   | 0.1   | 0.2   | 2.1   | 3.3   | 0.4   | 0.3   | 0.1   | 0.3   | 2.6   | 2.5   | 1.4   |
| Pdlim5   | 50.3  | 45.8  | 45.7  | 53.1  | 49.4  | 48.5  | 58.1  | 45.8  | 57.5  | 52.3  | 63.7  | 59.8  |
| Pdlim7   | 18.5  | 19.5  | 16.4  | 26.2  | 25.2  | 21.5  | 25.6  | 19.5  | 23.9  | 22.1  | 26.4  | 19.1  |
| Pdp1     | 2.5   | 2.7   | 3.3   | 3.4   | 3.1   | 3.3   | 2.5   | 4.4   | 3.3   | 3.2   | 2.8   | 3.4   |
| Pdp2     | 1.9   | 2.1   | 2.0   | 1.2   | 2.1   | 1.6   | 2.5   | 2.1   | 1.9   | 1.4   | 2.1   | 1.7   |
| Pdpk1    | 13.5  | 14.7  | 13.8  | 15.9  | 11.1  | 13.4  | 13.7  | 11.7  | 13.0  | 11.2  | 14.4  | 14.0  |
| Pdpn     | 233.4 | 171.4 | 148.1 | 273.9 | 226.2 | 180.3 | 223.1 | 194.0 | 143.2 | 299.5 | 295.5 | 203.6 |
| Pdpr     | 4.5   | 5.5   | 5.2   | 4.8   | 4.8   | 5.5   | 5.1   | 5.5   | 4.8   | 4.2   | 5.5   | 5.5   |
| Pdrg1    | 94.0  | 67.7  | 60.5  | 88.2  | 73.1  | 77.4  | 72.5  | 63.5  | 68.4  | 91.5  | 91.7  | 76.6  |
| Pds5a    | 22.9  | 24.5  | 21.8  | 21.2  | 21.4  | 22.5  | 19.9  | 20.9  | 18.7  | 20.7  | 22.5  | 21.4  |
| Pds5b    | 2.1   | 2.6   | 3.6   | 2.0   | 2.6   | 2.5   | 2.8   | 3.3   | 2.7   | 2.9   | 3.0   | 3.1   |
| Pdss1    | 0.8   | 0.8   | 0.6   | 0.9   | 0.7   | 0.3   | 0.9   | 1.0   | 1.1   | 1.0   | 0.9   | 0.7   |
| Pdss2    | 3.1   | 3.3   | 2.4   | 3.4   | 2.8   | 3.2   | 2.4   | 3.0   | 3.0   | 3.3   | 2.5   | 2.4   |
| Pdxdc1   | 68.6  | 57.0  | 54.5  | 70.8  | 53.1  | 63.8  | 55.2  | 56.5  | 49.4  | 61.4  | 65.2  | 65.8  |
| Pdxk     | 6.0   | 6.2   | 6.3   | 6.5   | 6.1   | 5.6   | 5.0   | 6.3   | 5.2   | 5.3   | 4.8   | 4.5   |
| Pdxk-ps  | 0.0   | 0.0   | 0.0   | 0.0   | 0.0   | 0.0   | 0.0   | 0.0   | 0.0   | 0.0   | 0.0   | 0.0   |
| Pdyp     | 0.4   | 1.0   | 0.7   | 0.7   | 1.1   | 0.6   | 0.9   | 0.6   | 1.0   | 1.1   | 0.9   | 0.9   |
| Pdzd11   | 37.5  | 31.4  | 31.9  | 40.8  | 32.6  | 35.5  | 34.6  | 34.3  | 36.1  | 38.3  | 41.9  | 40.9  |
| Pdzd2    | 2.4   | 3.8   | 5.7   | 1.4   | 2.0   | 1.5   | 2.0   | 2.8   | 1.5   | 1.5   | 1.6   | 1.0   |
| Pdzd3    | 0.0   | 0.1   | 0.0   | 0.0   | 0.0   | 0.1   | 0.0   | 0.0   | 0.0   | 0.0   | 0.1   | 0.0   |
| Pdzd4    | 1.8   | 2.0   | 2.7   | 1.9   | 2.1   | 2.6   | 3.1   | 3.0   | 2.9   | 2.3   | 3.0   | 2.5   |
| Pdzd7    | 0.7   | 0.8   | 1.0   | 0.6   | 0.6   | 1.1   | 0.8   | 0.9   | 0.6   | 1.0   | 0.9   | 1.0   |
| Pdzd8    | 13.0  | 12.2  | 13.4  | 13.4  | 11.2  | 11.7  | 14.2  | 13.5  | 13.5  | 11.8  | 15.1  | 14.2  |
| Pdzd9    | 0.2   | 0.1   | 0.1   | 0.1   | 0.1   | 0.1   | 0.1   | 0.2   | 0.1   | 0.1   | 0.3   | 0.3   |
| Pdzk1    | 1.1   | 0.8   | 0.4   | 1.0   | 0.8   | 0.8   | 0.9   | 0.8   | 0.9   | 0.7   | 0.6   | 0.8   |
| Pdzk1ip1 | 0.3   | 0.1   | 0.1   | 0.1   | 0.0   | 0.1   | 0.2   | 0.4   | 0.0   | 0.0   | 0.2   | 0.1   |

Online Table 1

|        |       |       |       |       |       |       |       |       |       |       |       |       |
|--------|-------|-------|-------|-------|-------|-------|-------|-------|-------|-------|-------|-------|
| Pdzrn3 | 24.6  | 33.9  | 40.7  | 25.1  | 32.8  | 25.1  | 60.0  | 55.3  | 59.8  | 55.0  | 61.7  | 72.0  |
| Pdzrn4 | 0.1   | 0.1   | 0.0   | 0.1   | 0.1   | 0.1   | 0.2   | 0.1   | 0.0   | 0.0   | 0.0   | 0.1   |
| Pea15a | 211.6 | 196.4 | 156.5 | 308.9 | 198.9 | 240.5 | 213.8 | 140.8 | 188.4 | 174.7 | 205.3 | 178.0 |
| Pear1  | 5.9   | 6.5   | 6.2   | 6.4   | 7.1   | 8.0   | 8.1   | 5.7   | 7.4   | 8.1   | 5.2   | 5.5   |
| Pebp1  | 184.3 | 137.7 | 109.2 | 160.2 | 136.0 | 170.6 | 117.4 | 120.2 | 129.4 | 157.5 | 133.5 | 132.3 |
| Pecam1 | 4.0   | 0.9   | 2.3   | 1.2   | 1.1   | 1.0   | 2.4   | 4.5   | 2.9   | 0.4   | 0.5   | 0.7   |
| Pecr   | 7.5   | 5.6   | 4.2   | 8.3   | 4.5   | 8.0   | 5.3   | 4.4   | 3.5   | 4.2   | 4.6   | 4.6   |
| Pef1   | 29.2  | 24.3  | 19.0  | 29.1  | 23.2  | 24.7  | 25.0  | 26.6  | 28.1  | 29.9  | 30.6  | 24.7  |
| Peg10  | 56.3  | 198.8 | 177.8 | 35.5  | 80.5  | 29.1  | 67.9  | 88.2  | 87.5  | 63.3  | 71.4  | 77.2  |
| Peg12  | 1.0   | 0.9   | 1.0   | 0.8   | 0.8   | 1.5   | 1.4   | 1.1   | 1.3   | 0.9   | 1.0   | 0.9   |
| Peg13  | 4.7   | 3.5   | 3.9   | 5.3   | 4.0   | 5.3   | 4.8   | 4.3   | 4.8   | 4.8   | 4.3   | 4.1   |
| Peg3   | 1.6   | 1.7   | 1.7   | 1.6   | 1.1   | 1.3   | 1.2   | 1.8   | 1.2   | 2.2   | 2.7   | 1.7   |
| Peg3as | 2.1   | 1.9   | 1.3   | 1.7   | 0.9   | 1.1   | 0.9   | 1.7   | 1.4   | 2.5   | 2.9   | 2.6   |
| Peli1  | 3.2   | 4.1   | 4.8   | 2.7   | 3.7   | 3.0   | 3.7   | 4.7   | 3.9   | 4.1   | 4.0   | 4.6   |
| Peli2  | 1.0   | 1.1   | 1.5   | 2.0   | 0.9   | 1.3   | 1.0   | 1.7   | 1.7   | 1.1   | 1.0   | 1.0   |
| Peli3  | 1.6   | 1.2   | 1.2   | 1.0   | 0.9   | 1.6   | 1.0   | 0.4   | 0.8   | 1.1   | 0.7   | 0.9   |
| Pelo   | 8.4   | 7.6   | 7.9   | 6.1   | 6.7   | 7.2   | 6.7   | 9.0   | 7.3   | 9.4   | 8.8   | 7.1   |
| Pelp1  | 3.9   | 4.5   | 4.5   | 4.0   | 4.8   | 4.3   | 4.7   | 3.6   | 4.1   | 4.4   | 3.7   | 3.7   |
| Pemt   | 2.8   | 0.8   | 0.9   | 0.9   | 1.3   | 1.3   | 2.1   | 1.3   | 1.6   | 2.2   | 1.9   | 1.1   |
| Peo1   | 3.1   | 3.2   | 2.9   | 3.1   | 2.3   | 3.4   | 2.9   | 2.9   | 2.4   | 3.4   | 3.4   | 3.1   |
| Pepd   | 15.7  | 15.9  | 11.6  | 18.0  | 15.7  | 16.8  | 12.8  | 13.2  | 12.4  | 14.3  | 12.9  | 13.4  |
| Per1   | 1.1   | 1.7   | 1.4   | 1.4   | 1.1   | 1.5   | 1.2   | 1.0   | 1.4   | 1.6   | 1.2   | 1.0   |
| Per2   | 0.6   | 0.7   | 0.8   | 0.7   | 0.7   | 0.9   | 0.9   | 0.6   | 0.7   | 1.2   | 0.9   | 0.9   |
| Per3   | 5.2   | 7.5   | 8.5   | 4.0   | 4.8   | 5.6   | 5.0   | 7.5   | 5.8   | 4.1   | 4.2   | 4.6   |
| Perp   | 11.2  | 4.7   | 2.7   | 3.4   | 2.4   | 4.8   | 1.8   | 1.0   | 1.0   | 8.5   | 4.5   | 3.5   |
| Pes1   | 26.5  | 21.9  | 18.8  | 32.3  | 23.6  | 27.6  | 24.9  | 21.1  | 19.4  | 23.3  | 24.1  | 23.5  |
| Pet100 | 15.6  | 16.6  | 19.8  | 20.4  | 16.7  | 19.5  | 20.5  | 17.3  | 14.7  | 15.2  | 18.0  | 20.3  |
| Pet112 | 4.0   | 4.4   | 4.0   | 3.3   | 3.1   | 4.4   | 2.6   | 3.9   | 3.2   | 3.2   | 3.4   | 3.1   |
| Pet117 | 0.0   | 0.3   | 0.6   | 0.9   | 0.0   | 1.7   | 0.6   | 2.2   | 0.2   | 2.2   | 0.7   | 1.8   |
| Pet2   | 0.0   | 0.0   | 0.0   | 0.0   | 0.0   | 0.0   | 0.0   | 0.0   | 0.0   | 0.0   | 0.0   | 0.0   |
| Pex1   | 2.2   | 2.1   | 2.3   | 2.1   | 2.3   | 2.2   | 1.7   | 1.7   | 1.6   | 2.1   | 1.8   | 1.9   |
| Pex10  | 1.6   | 1.9   | 1.8   | 1.5   | 1.4   | 1.6   | 1.4   | 2.0   | 1.5   | 1.7   | 1.8   | 1.4   |
| Pex11a | 1.2   | 1.1   | 0.6   | 1.0   | 0.8   | 1.6   | 0.9   | 0.7   | 0.4   | 1.8   | 0.8   | 1.1   |
| Pex11b | 13.7  | 12.5  | 12.1  | 10.8  | 12.2  | 15.0  | 12.8  | 12.4  | 12.2  | 13.7  | 10.7  | 12.2  |
| Pex11c | 2.4   | 2.7   | 2.5   | 2.5   | 2.2   | 2.9   | 2.5   | 3.3   | 3.2   | 3.2   | 2.4   | 1.8   |
| Pex12  | 2.8   | 3.4   | 3.7   | 4.2   | 3.0   | 4.9   | 3.2   | 3.0   | 2.8   | 3.5   | 2.7   | 3.3   |
| Pex13  | 8.5   | 9.0   | 7.6   | 7.5   | 8.1   | 8.6   | 7.2   | 7.4   | 8.9   | 10.9  | 9.9   | 10.5  |
| Pex14  | 19.2  | 21.1  | 18.5  | 20.8  | 17.3  | 17.9  | 21.8  | 19.1  | 19.7  | 18.0  | 19.5  | 18.3  |
| Pex16  | 6.1   | 7.8   | 6.3   | 8.0   | 6.0   | 7.5   | 8.4   | 6.6   | 7.5   | 6.2   | 5.7   | 6.4   |
| Pex19  | 41.4  | 48.0  | 44.2  | 43.2  | 38.2  | 39.0  | 39.7  | 42.5  | 45.5  | 36.1  | 38.8  | 38.7  |
| Pex2   | 14.6  | 12.6  | 11.8  | 11.0  | 12.0  | 10.2  | 12.0  | 13.1  | 15.5  | 14.1  | 14.3  | 13.8  |
| Pex26  | 1.4   | 1.3   | 1.1   | 1.5   | 1.3   | 1.5   | 1.2   | 1.2   | 1.3   | 1.5   | 1.2   | 1.2   |
| Pex3   | 11.7  | 12.0  | 10.3  | 10.0  | 10.1  | 12.2  | 10.2  | 9.3   | 9.9   | 10.2  | 10.2  | 11.4  |
| Pex5   | 17.1  | 15.0  | 13.5  | 13.1  | 14.1  | 14.8  | 12.6  | 12.6  | 14.4  | 13.9  | 14.0  | 11.4  |
| Pex5l  | 1.6   | 0.5   | 0.1   | 1.3   | 0.1   | 0.2   | 0.2   | 0.0   | 0.2   | 0.1   | 0.3   | 0.2   |
| Pex6   | 8.7   | 10.7  | 9.2   | 6.6   | 8.2   | 9.2   | 8.0   | 8.5   | 9.4   | 9.9   | 6.9   | 7.4   |
| Pex7   | 15.2  | 15.1  | 11.8  | 13.0  | 10.8  | 11.4  | 11.1  | 10.1  | 9.6   | 12.2  | 11.9  | 12.0  |
| Pf4    | 3.6   | 3.0   | 2.7   | 6.5   | 9.6   | 3.0   | 2.6   | 1.4   | 1.2   | 1.4   | 0.5   | 1.0   |
| Pfas   | 4.1   | 4.0   | 3.5   | 4.5   | 4.3   | 3.9   | 3.9   | 4.2   | 3.8   | 3.2   | 3.5   | 3.1   |
| Pfdn1  | 42.5  | 32.2  | 32.0  | 43.7  | 34.7  | 39.6  | 34.1  | 33.3  | 29.2  | 39.3  | 40.3  | 40.3  |
| Pfdn2  | 11.9  | 12.2  | 13.3  | 14.6  | 13.4  | 15.3  | 12.3  | 11.4  | 9.4   | 15.6  | 14.1  | 14.6  |
| Pfdn4  | 32.1  | 25.9  | 25.3  | 25.9  | 22.7  | 25.5  | 22.4  | 22.4  | 25.0  | 26.2  | 31.5  | 27.4  |
| Pfdn5  | 170.9 | 141.4 | 162.3 | 177.3 | 134.4 | 181.2 | 169.1 | 172.7 | 132.9 | 160.1 | 165.9 | 179.9 |
| Pfkfb1 | 0.3   | 0.7   | 0.8   | 0.3   | 0.4   | 0.4   | 0.8   | 0.4   | 0.7   | 0.5   | 0.4   | 0.4   |
| Pfkfb2 | 6.2   | 5.7   | 5.2   | 6.1   | 4.3   | 4.9   | 4.2   | 4.2   | 3.9   | 5.4   | 5.5   | 5.4   |
| Pfkfb3 | 4.8   | 4.4   | 2.7   | 5.3   | 5.1   | 4.6   | 5.2   | 3.0   | 4.9   | 5.0   | 5.1   | 4.6   |
| Pfkfb4 | 1.8   | 1.9   | 1.7   | 2.0   | 2.6   | 2.2   | 2.4   | 2.1   | 2.1   | 1.6   | 2.0   | 1.6   |

Online Table 1

|         |       |       |       |       |       |       |       |       |       |       |       |       |
|---------|-------|-------|-------|-------|-------|-------|-------|-------|-------|-------|-------|-------|
| Pfkl    | 21.1  | 21.7  | 22.6  | 17.5  | 27.1  | 21.8  | 27.8  | 19.7  | 28.5  | 26.5  | 22.2  | 32.4  |
| Pfkm    | 15.5  | 16.1  | 16.2  | 16.9  | 14.2  | 19.3  | 15.3  | 14.3  | 12.9  | 15.0  | 13.7  | 14.8  |
| Pfkp    | 17.8  | 17.6  | 15.1  | 21.1  | 23.4  | 19.7  | 16.5  | 14.2  | 14.3  | 11.4  | 15.0  | 13.5  |
| Pfn1    | 264.7 | 204.9 | 204.4 | 339.9 | 348.3 | 243.0 | 305.8 | 272.8 | 282.7 | 278.9 | 276.0 | 232.4 |
| Pfn2    | 37.3  | 32.8  | 30.5  | 44.7  | 30.7  | 47.4  | 33.8  | 32.9  | 30.0  | 38.3  | 38.9  | 40.3  |
| Pfn4    | 0.2   | 0.4   | 0.4   | 0.3   | 0.1   | 0.4   | 0.1   | 0.3   | 0.1   | 0.3   | 0.3   | 0.5   |
| Pgam1   | 207.9 | 175.6 | 126.6 | 224.3 | 220.6 | 212.4 | 190.6 | 155.2 | 177.0 | 181.4 | 179.1 | 166.0 |
| Pgam2   | 3.2   | 3.3   | 5.5   | 1.3   | 2.0   | 2.4   | 1.7   | 2.5   | 2.9   | 1.9   | 2.1   | 4.6   |
| Pgam5   | 16.5  | 12.7  | 10.6  | 13.3  | 12.0  | 15.0  | 12.8  | 11.3  | 12.3  | 14.4  | 12.6  | 11.6  |
| Pgap1   | 0.5   | 0.7   | 0.7   | 0.8   | 0.9   | 0.7   | 0.6   | 0.9   | 0.9   | 1.1   | 1.0   | 0.9   |
| Pgap2   | 20.7  | 20.3  | 16.2  | 20.0  | 17.4  | 22.1  | 16.5  | 17.0  | 15.9  | 16.6  | 15.7  | 16.0  |
| Pgap3   | 0.7   | 0.7   | 0.9   | 0.8   | 0.8   | 0.8   | 0.8   | 0.9   | 0.9   | 0.9   | 0.6   | 0.5   |
| Pgbd1   | 0.3   | 0.3   | 0.2   | 0.2   | 0.1   | 0.2   | 0.2   | 0.3   | 0.1   | 0.3   | 0.2   | 0.3   |
| Pgbd5   | 0.1   | 0.2   | 0.3   | 0.2   | 0.2   | 0.1   | 0.2   | 0.2   | 0.1   | 0.0   | 0.2   | 0.2   |
| Pgd     | 61.6  | 66.2  | 47.0  | 109.9 | 99.5  | 96.2  | 61.5  | 66.9  | 41.3  | 53.9  | 53.6  | 45.4  |
| Pgf     | 4.5   | 1.5   | 3.5   | 0.9   | 0.8   | 0.8   | 1.8   | 5.7   | 3.3   | 0.7   | 0.9   | 1.5   |
| Pggt1b  | 7.6   | 7.8   | 8.5   | 7.8   | 8.6   | 8.6   | 7.4   | 6.7   | 7.9   | 7.2   | 7.6   | 8.3   |
| Pgk1    | 198.8 | 157.4 | 114.3 | 195.4 | 250.7 | 157.3 | 160.9 | 133.7 | 173.3 | 158.5 | 153.3 | 162.2 |
| Pgls    | 54.9  | 39.7  | 31.8  | 44.8  | 39.3  | 41.4  | 42.1  | 39.9  | 39.6  | 49.4  | 36.5  | 37.5  |
| Pglyrp1 | 0.1   | 0.1   | 0.0   | 0.0   | 0.0   | 0.1   | 0.3   | 0.0   | 0.1   | 0.1   | 0.0   | 0.0   |
| Pglyrp3 | 0.3   | 0.1   | 0.0   | 0.3   | 0.1   | 0.0   | 0.1   | 0.1   | 0.1   | 0.3   | 0.2   | 0.1   |
| Pgm1    | 7.2   | 8.0   | 7.7   | 9.3   | 8.5   | 8.0   | 8.4   | 8.4   | 7.7   | 8.8   | 8.8   | 9.5   |
| Pgm2    | 36.3  | 34.6  | 30.4  | 40.4  | 32.9  | 45.0  | 33.7  | 33.9  | 29.5  | 33.8  | 33.4  | 33.8  |
| Pgm2l1  | 0.7   | 0.6   | 0.8   | 2.0   | 2.4   | 0.8   | 0.7   | 0.8   | 0.6   | 0.5   | 0.7   | 0.6   |
| Pgm3    | 10.3  | 9.3   | 8.5   | 11.2  | 9.4   | 9.8   | 10.1  | 9.3   | 8.9   | 9.6   | 11.3  | 11.0  |
| Pgm5    | 0.1   | 0.1   | 0.1   | 0.2   | 0.1   | 0.1   | 0.1   | 0.2   | 0.0   | 0.1   | 0.0   | 0.1   |
| Pgp     | 15.2  | 13.2  | 9.5   | 9.7   | 12.1  | 10.3  | 15.9  | 12.8  | 14.8  | 14.6  | 12.4  | 11.5  |
| Pgpep1  | 9.6   | 9.1   | 7.1   | 8.4   | 6.7   | 10.4  | 7.0   | 7.0   | 7.3   | 8.2   | 8.5   | 8.6   |
| Pgpep1l | 3.3   | 2.8   | 1.4   | 2.7   | 2.8   | 4.7   | 2.0   | 3.3   | 2.3   | 2.2   | 2.2   | 1.1   |
| Pgr     | 0.0   | 0.0   | 0.0   | 0.0   | 0.0   | 0.0   | 0.0   | 0.0   | 0.0   | 0.0   | 0.0   | 0.0   |
| Pgrmc1  | 98.8  | 94.3  | 76.1  | 110.1 | 76.3  | 122.4 | 68.6  | 67.5  | 75.1  | 112.4 | 96.5  | 93.0  |
| Pgrmc2  | 18.3  | 17.4  | 17.8  | 17.8  | 13.7  | 15.8  | 17.6  | 15.1  | 17.7  | 18.7  | 19.3  | 19.4  |
| Pgs1    | 15.9  | 17.7  | 14.6  | 15.5  | 18.3  | 12.7  | 20.2  | 16.8  | 18.5  | 17.0  | 17.0  | 16.2  |
| Phactr1 | 3.7   | 4.7   | 5.1   | 5.3   | 4.0   | 5.1   | 4.4   | 4.5   | 3.8   | 2.5   | 3.0   | 3.4   |
| Phactr2 | 6.6   | 5.3   | 4.8   | 9.8   | 4.7   | 7.6   | 5.6   | 4.0   | 4.1   | 3.6   | 4.8   | 4.8   |
| Phactr3 | 0.0   | 0.0   | 0.0   | 0.0   | 0.0   | 0.0   | 0.0   | 0.0   | 0.0   | 0.0   | 0.0   | 0.0   |
| Phactr4 | 1.6   | 2.1   | 2.1   | 2.1   | 2.0   | 2.0   | 2.9   | 2.1   | 1.9   | 1.5   | 1.6   | 1.4   |
| Phax    | 26.3  | 23.7  | 26.8  | 26.4  | 22.6  | 24.6  | 25.6  | 25.6  | 22.3  | 28.3  | 30.3  | 31.4  |
| Phb     | 58.5  | 51.4  | 41.8  | 61.3  | 48.0  | 51.6  | 54.0  | 47.0  | 48.0  | 53.0  | 52.4  | 44.3  |
| Phb2    | 50.3  | 44.1  | 40.4  | 47.9  | 45.1  | 46.9  | 47.5  | 49.0  | 44.7  | 44.9  | 50.0  | 42.1  |
| Phc1    | 1.9   | 1.9   | 2.1   | 1.8   | 1.7   | 2.2   | 2.5   | 2.5   | 2.2   | 1.8   | 1.9   | 1.8   |
| Phc2    | 10.5  | 10.4  | 9.6   | 11.5  | 14.2  | 9.5   | 15.2  | 11.5  | 13.5  | 14.9  | 12.5  | 12.4  |
| Phc3    | 4.5   | 5.4   | 5.3   | 4.7   | 4.6   | 4.7   | 4.6   | 4.7   | 4.0   | 4.3   | 4.5   | 4.5   |
| Phex    | 0.0   | 0.0   | 0.0   | 0.0   | 0.0   | 0.0   | 0.0   | 0.0   | 0.0   | 0.0   | 0.0   | 0.0   |
| Phf1    | 7.6   | 10.6  | 10.0  | 8.6   | 7.6   | 9.0   | 9.0   | 7.6   | 10.1  | 8.8   | 6.7   | 8.2   |
| Phf10   | 36.2  | 38.4  | 41.3  | 33.2  | 27.4  | 32.2  | 29.4  | 38.6  | 33.3  | 31.6  | 35.3  | 38.2  |
| Phf11a  | 1.5   | 0.7   | 1.6   | 2.2   | 1.3   | 1.1   | 0.8   | 0.7   | 0.6   | 0.4   | 0.3   | 0.9   |
| Phf11b  | 2.3   | 1.2   | 1.6   | 4.9   | 2.2   | 1.4   | 0.6   | 0.4   | 0.5   | 0.5   | 0.5   | 0.8   |
| Phf11c  | 0.8   | 0.6   | 0.6   | 0.8   | 0.7   | 0.6   | 0.4   | 0.6   | 0.4   | 0.5   | 0.2   | 0.4   |
| Phf11d  | 7.8   | 4.9   | 8.9   | 13.3  | 5.2   | 6.9   | 3.7   | 3.0   | 2.5   | 1.4   | 2.4   | 6.0   |
| Phf12   | 1.8   | 3.0   | 3.1   | 2.2   | 2.6   | 2.1   | 2.3   | 3.0   | 2.4   | 1.9   | 2.6   | 2.0   |
| Phf13   | 4.0   | 5.5   | 4.8   | 2.5   | 4.3   | 4.6   | 5.2   | 3.7   | 5.1   | 4.8   | 4.7   | 3.7   |
| Phf14   | 8.8   | 9.1   | 10.3  | 9.3   | 7.6   | 8.0   | 8.5   | 9.6   | 7.8   | 8.7   | 9.1   | 11.0  |
| Phf15   | 3.0   | 2.5   | 3.2   | 4.5   | 4.8   | 2.5   | 2.8   | 2.0   | 1.5   | 3.8   | 2.7   | 2.5   |
| Phf16   | 2.4   | 1.8   | 1.4   | 1.8   | 1.8   | 2.2   | 1.4   | 1.4   | 1.2   | 2.3   | 2.1   | 2.0   |
| Phf17   | 21.3  | 26.3  | 26.4  | 20.2  | 17.9  | 21.7  | 20.5  | 23.6  | 25.9  | 26.1  | 31.6  | 32.3  |
| Phf19   | 0.3   | 0.4   | 0.7   | 0.3   | 0.7   | 0.3   | 1.0   | 0.4   | 0.7   | 0.3   | 0.4   | 0.5   |

Online Table 1

|          |       |       |       |      |       |      |       |       |       |       |       |       |
|----------|-------|-------|-------|------|-------|------|-------|-------|-------|-------|-------|-------|
| Phf2     | 4.0   | 5.4   | 5.9   | 4.7  | 4.6   | 5.4  | 5.3   | 5.3   | 5.0   | 4.7   | 5.0   | 4.3   |
| Phf20    | 5.8   | 7.0   | 6.8   | 5.4  | 6.2   | 6.9  | 6.7   | 6.5   | 6.7   | 6.8   | 6.7   | 7.8   |
| Phf2011  | 5.4   | 5.7   | 6.2   | 6.0  | 5.8   | 5.4  | 6.6   | 6.9   | 5.8   | 6.9   | 7.5   | 6.9   |
| Phf21a   | 4.2   | 4.4   | 5.4   | 4.3  | 3.8   | 4.6  | 4.0   | 4.9   | 3.7   | 3.7   | 4.0   | 4.0   |
| Phf21b   | 0.1   | 0.1   | 0.1   | 0.0  | 0.0   | 0.1  | 0.1   | 0.1   | 0.0   | 0.0   | 0.0   | 0.2   |
| Phf23    | 18.8  | 19.4  | 19.2  | 19.6 | 20.8  | 17.9 | 22.4  | 21.9  | 22.7  | 21.5  | 20.3  | 22.6  |
| Phf3     | 20.1  | 22.1  | 22.6  | 19.4 | 17.2  | 19.4 | 21.3  | 20.2  | 18.0  | 19.2  | 23.1  | 24.2  |
| Phf5a    | 11.5  | 10.4  | 8.9   | 11.2 | 10.8  | 9.2  | 10.1  | 10.2  | 11.0  | 11.8  | 8.5   | 9.5   |
| Phf6     | 3.5   | 4.6   | 5.0   | 4.6  | 4.4   | 4.0  | 3.9   | 4.2   | 3.7   | 4.5   | 5.5   | 4.5   |
| Phf7     | 1.6   | 2.0   | 1.9   | 1.3  | 1.5   | 1.8  | 1.6   | 1.7   | 1.4   | 1.6   | 1.6   | 1.7   |
| Phf8     | 11.3  | 11.0  | 9.7   | 9.2  | 9.2   | 6.7  | 10.9  | 8.3   | 10.9  | 8.9   | 11.0  | 9.9   |
| Phgdh    | 65.8  | 42.5  | 28.7  | 52.2 | 30.4  | 55.9 | 46.1  | 73.6  | 57.3  | 51.1  | 60.6  | 33.1  |
| Phip     | 5.1   | 6.3   | 7.2   | 5.2  | 7.1   | 5.3  | 5.6   | 6.3   | 5.9   | 6.7   | 6.9   | 7.1   |
| Phka1    | 3.6   | 4.0   | 3.9   | 3.8  | 3.5   | 4.2  | 3.6   | 3.7   | 3.4   | 2.8   | 3.6   | 3.4   |
| Phka2    | 2.5   | 2.7   | 3.1   | 2.6  | 4.1   | 2.2  | 2.9   | 3.1   | 2.9   | 2.8   | 2.7   | 2.6   |
| Phkb     | 12.4  | 12.0  | 10.7  | 12.8 | 10.5  | 14.1 | 10.9  | 12.9  | 11.4  | 11.1  | 12.2  | 11.3  |
| Phkg1    | 0.6   | 0.6   | 1.2   | 0.7  | 0.5   | 1.3  | 0.4   | 1.0   | 0.5   | 0.5   | 0.5   | 0.8   |
| Phkg2    | 6.9   | 5.5   | 4.4   | 6.3  | 5.6   | 6.4  | 5.6   | 4.9   | 6.2   | 5.6   | 5.5   | 4.8   |
| Phlda1   | 1.5   | 1.3   | 0.8   | 1.3  | 2.6   | 1.0  | 1.2   | 0.5   | 1.0   | 2.3   | 1.4   | 1.0   |
| Phlda2   | 0.3   | 0.1   | 0.0   | 0.1  | 0.2   | 0.0  | 0.1   | 0.0   | 0.0   | 0.1   | 0.4   | 0.0   |
| Phlda3   | 116.9 | 129.0 | 114.8 | 88.7 | 105.2 | 94.2 | 124.1 | 150.8 | 157.1 | 146.1 | 130.3 | 135.9 |
| Phldb1   | 29.6  | 29.3  | 26.0  | 30.2 | 27.5  | 30.5 | 39.1  | 34.3  | 30.9  | 28.9  | 34.7  | 28.1  |
| Phldb2   | 94.8  | 126.4 | 142.5 | 79.2 | 106.1 | 74.6 | 132.8 | 131.1 | 144.8 | 111.4 | 136.6 | 168.7 |
| Phldb3   | 0.6   | 0.3   | 0.3   | 1.1  | 0.6   | 0.5  | 0.6   | 0.2   | 0.3   | 1.1   | 0.8   | 0.4   |
| Phlpp1   | 1.8   | 2.1   | 1.7   | 2.1  | 1.7   | 2.0  | 2.1   | 1.6   | 2.5   | 2.1   | 2.3   | 2.0   |
| Phlpp2   | 1.3   | 1.8   | 1.6   | 1.2  | 1.5   | 1.2  | 1.8   | 1.7   | 1.9   | 1.6   | 1.7   | 1.4   |
| Phospho1 | 0.1   | 0.2   | 0.1   | 0.3  | 0.2   | 0.3  | 0.1   | 0.2   | 0.2   | 0.1   | 0.1   | 0.2   |
| Phospho2 | 11.9  | 12.9  | 10.9  | 13.6 | 11.4  | 12.2 | 8.9   | 10.3  | 10.7  | 12.3  | 11.3  | 13.2  |
| Phox2a   | 0.0   | 0.0   | 0.0   | 0.0  | 0.1   | 0.2  | 0.0   | 0.0   | 0.0   | 0.1   | 0.1   | 0.0   |
| Phpt1    | 10.0  | 9.6   | 10.6  | 8.5  | 6.9   | 9.2  | 7.3   | 12.7  | 8.4   | 13.5  | 10.6  | 10.2  |
| Phrf1    | 7.0   | 8.1   | 8.0   | 8.0  | 8.0   | 7.4  | 9.2   | 8.7   | 7.7   | 7.4   | 7.3   | 7.9   |
| Phtf1    | 29.1  | 27.4  | 25.5  | 32.0 | 26.2  | 34.9 | 29.9  | 23.8  | 25.4  | 26.3  | 32.0  | 29.4  |
| Phtf2    | 3.2   | 2.9   | 3.0   | 2.8  | 3.3   | 2.6  | 2.8   | 2.5   | 3.0   | 3.2   | 3.2   | 3.0   |
| Phxr4    | 0.3   | 1.0   | 0.9   | 0.7  | 0.5   | 0.4  | 0.9   | 0.6   | 0.3   | 0.5   | 0.7   | 0.3   |
| Phyh     | 10.8  | 10.9  | 15.0  | 10.8 | 8.8   | 12.9 | 8.6   | 14.9  | 8.6   | 6.8   | 8.3   | 10.7  |
| Phyhd1   | 14.4  | 9.6   | 9.2   | 11.1 | 7.2   | 15.5 | 11.2  | 22.6  | 19.1  | 13.4  | 14.0  | 13.8  |
| Phyhip   | 0.6   | 0.8   | 0.9   | 0.4  | 0.5   | 0.3  | 0.5   | 0.6   | 0.3   | 0.6   | 0.4   | 0.6   |
| Phyhipl  | 0.8   | 2.0   | 4.6   | 1.0  | 1.5   | 1.3  | 2.0   | 4.0   | 3.2   | 1.8   | 2.1   | 2.4   |
| Pi15     | 0.4   | 0.5   | 2.5   | 0.3  | 0.7   | 0.3  | 0.9   | 3.8   | 2.2   | 0.6   | 0.8   | 1.3   |
| Pi16     | 0.7   | 1.0   | 2.7   | 0.3  | 0.4   | 0.1  | 0.3   | 2.7   | 0.4   | 0.3   | 0.6   | 0.5   |
| Pi4k2a   | 10.1  | 10.3  | 8.6   | 9.6  | 10.6  | 10.4 | 10.0  | 8.8   | 9.2   | 8.7   | 9.0   | 8.5   |
| Pi4k2b   | 14.9  | 16.5  | 15.6  | 15.0 | 13.6  | 14.5 | 15.0  | 12.9  | 13.7  | 13.1  | 14.5  | 15.6  |
| Pi4ka    | 16.0  | 14.8  | 13.6  | 18.9 | 16.3  | 16.9 | 16.5  | 14.1  | 13.9  | 14.0  | 14.9  | 14.6  |
| Pi4kb    | 14.8  | 15.2  | 15.0  | 14.4 | 13.1  | 14.9 | 13.3  | 15.2  | 14.2  | 14.2  | 14.1  | 14.4  |
| Pianp    | 0.0   | 0.0   | 0.1   | 0.0  | 0.0   | 0.0  | 0.1   | 0.0   | 0.0   | 0.1   | 0.0   | 0.1   |
| Pias1    | 5.5   | 7.0   | 7.1   | 6.0  | 5.3   | 5.7  | 6.3   | 6.6   | 6.0   | 5.9   | 6.3   | 6.4   |
| Pias2    | 9.4   | 9.7   | 10.2  | 9.8  | 9.8   | 9.5  | 9.5   | 8.5   | 7.9   | 9.8   | 9.7   | 10.0  |
| Pias3    | 6.6   | 7.1   | 7.0   | 5.8  | 6.0   | 6.1  | 7.1   | 6.8   | 7.2   | 6.4   | 6.7   | 6.5   |
| Pias4    | 6.4   | 7.9   | 6.0   | 6.3  | 7.7   | 7.0  | 5.7   | 7.5   | 6.9   | 7.3   | 5.9   | 6.1   |
| Pibf1    | 5.5   | 5.1   | 5.8   | 5.3  | 5.2   | 5.6  | 4.7   | 4.6   | 4.8   | 5.8   | 6.1   | 5.7   |
| Picalm   | 54.6  | 63.4  | 79.9  | 64.3 | 79.6  | 57.8 | 65.0  | 76.6  | 67.3  | 69.7  | 81.7  | 83.6  |
| Pick1    | 3.0   | 2.2   | 2.4   | 3.1  | 2.2   | 3.0  | 2.4   | 3.2   | 2.0   | 2.7   | 2.4   | 2.2   |
| Pid1     | 10.1  | 8.7   | 9.3   | 13.0 | 18.2  | 6.7  | 10.4  | 8.0   | 11.3  | 8.7   | 9.0   | 9.4   |
| Piezo1   | 23.8  | 19.6  | 15.9  | 19.1 | 19.4  | 19.0 | 24.5  | 15.0  | 18.4  | 31.8  | 25.2  | 17.2  |
| Piezo2   | 1.8   | 3.2   | 3.5   | 1.5  | 3.5   | 1.7  | 6.8   | 5.1   | 7.5   | 9.3   | 8.2   | 9.9   |
| Pif1     | 0.3   | 0.6   | 0.8   | 0.0  | 0.6   | 0.1  | 1.0   | 0.4   | 1.2   | 0.3   | 0.7   | 0.4   |
| Piga     | 1.2   | 1.6   | 2.0   | 1.0  | 1.5   | 1.0  | 1.5   | 1.8   | 2.1   | 1.8   | 1.4   | 1.6   |

Online Table 1

|          |      |      |      |      |      |      |      |      |      |      |      |      |
|----------|------|------|------|------|------|------|------|------|------|------|------|------|
| Pigb     | 3.5  | 3.3  | 3.1  | 3.5  | 2.7  | 3.4  | 3.1  | 2.9  | 2.8  | 2.9  | 2.7  | 2.5  |
| Pigc     | 5.6  | 6.8  | 6.3  | 5.6  | 6.1  | 6.6  | 5.8  | 6.5  | 7.7  | 6.6  | 6.5  | 7.3  |
| Pigf     | 23.3 | 24.5 | 23.0 | 22.4 | 24.2 | 25.5 | 24.3 | 25.1 | 23.0 | 23.8 | 29.4 | 25.9 |
| Pigg     | 7.1  | 8.0  | 6.6  | 7.4  | 6.2  | 7.9  | 6.1  | 6.0  | 7.1  | 6.4  | 6.7  | 6.7  |
| Pigh     | 7.8  | 8.2  | 8.2  | 9.0  | 7.4  | 9.3  | 9.6  | 8.7  | 9.0  | 9.2  | 10.5 | 9.0  |
| Pigk     | 34.4 | 30.4 | 27.6 | 32.4 | 28.8 | 36.4 | 27.6 | 26.8 | 28.3 | 27.6 | 28.6 | 29.5 |
| Pigl     | 1.5  | 1.8  | 1.5  | 1.9  | 1.7  | 2.1  | 1.1  | 1.8  | 1.4  | 1.5  | 1.9  | 1.3  |
| Pigm     | 2.6  | 2.7  | 2.2  | 2.8  | 2.9  | 2.6  | 2.6  | 2.4  | 2.7  | 2.6  | 2.4  | 2.3  |
| Pign     | 9.5  | 10.6 | 10.9 | 9.2  | 10.8 | 8.3  | 10.5 | 10.9 | 11.2 | 11.1 | 11.2 | 11.1 |
| Pigo     | 0.8  | 1.3  | 1.0  | 0.8  | 1.2  | 0.8  | 1.3  | 1.8  | 1.8  | 1.2  | 0.8  | 1.0  |
| Pigp     | 33.5 | 34.9 | 31.2 | 27.7 | 28.9 | 28.0 | 28.1 | 30.5 | 36.0 | 35.3 | 31.6 | 35.0 |
| Pigq     | 8.7  | 7.9  | 7.5  | 10.8 | 8.4  | 9.5  | 7.7  | 8.5  | 7.5  | 6.9  | 7.3  | 7.4  |
| Pigs     | 22.1 | 18.1 | 16.7 | 21.0 | 23.1 | 23.5 | 21.4 | 23.9 | 21.5 | 19.2 | 18.0 | 17.7 |
| Pigt     | 6.7  | 6.7  | 8.4  | 8.1  | 8.3  | 8.3  | 8.9  | 8.2  | 6.8  | 6.7  | 6.8  | 6.7  |
| Pigu     | 8.2  | 7.1  | 8.9  | 7.9  | 9.5  | 8.4  | 10.2 | 11.9 | 9.5  | 8.3  | 9.9  | 8.7  |
| Pigv     | 3.5  | 2.9  | 2.1  | 3.8  | 3.3  | 2.8  | 3.1  | 3.1  | 3.8  | 3.3  | 3.1  | 3.0  |
| Pigw     | 0.5  | 0.7  | 0.7  | 1.0  | 0.9  | 0.9  | 0.8  | 1.0  | 0.8  | 0.9  | 0.9  | 0.9  |
| Pigx     | 13.5 | 11.2 | 12.1 | 13.7 | 9.6  | 12.8 | 9.4  | 10.5 | 12.3 | 11.4 | 12.8 | 12.7 |
| Pigy     | 16.0 | 17.5 | 17.5 | 12.8 | 14.1 | 15.7 | 16.4 | 15.9 | 21.2 | 27.1 | 19.4 | 19.3 |
| Pigz     | 0.1  | 0.2  | 0.2  | 0.4  | 0.4  | 0.0  | 0.4  | 0.3  | 0.1  | 0.1  | 0.2  | 0.2  |
| Pih1d1   | 19.0 | 15.6 | 17.7 | 17.4 | 17.0 | 18.0 | 17.5 | 19.1 | 19.0 | 14.9 | 16.0 | 14.8 |
| Pih1d2   | 0.7  | 0.9  | 0.6  | 0.8  | 0.8  | 1.3  | 0.7  | 0.7  | 0.7  | 0.7  | 0.9  | 0.5  |
| Pik3ap1  | 1.6  | 0.0  | 0.0  | 8.9  | 18.4 | 0.0  | 2.7  | 0.3  | 0.4  | 1.5  | 0.4  | 1.2  |
| Pik3c2a  | 17.5 | 17.1 | 15.2 | 18.1 | 20.1 | 15.9 | 16.9 | 15.6 | 16.4 | 17.5 | 21.4 | 18.7 |
| Pik3c2b  | 0.2  | 0.2  | 0.2  | 0.3  | 0.1  | 0.3  | 0.2  | 0.1  | 0.1  | 0.1  | 0.1  | 0.1  |
| Pik3c3   | 11.6 | 13.0 | 13.4 | 10.3 | 11.9 | 11.2 | 9.8  | 11.5 | 10.7 | 11.4 | 11.8 | 11.5 |
| Pik3ca   | 14.1 | 14.9 | 13.4 | 14.4 | 14.0 | 15.3 | 12.3 | 12.0 | 13.7 | 15.0 | 15.8 | 15.6 |
| Pik3cb   | 4.2  | 3.0  | 2.5  | 4.5  | 5.7  | 3.8  | 3.5  | 2.9  | 4.1  | 4.1  | 5.1  | 3.7  |
| Pik3cd   | 1.4  | 1.6  | 1.3  | 2.2  | 3.2  | 1.6  | 1.6  | 1.2  | 1.1  | 1.3  | 1.2  | 1.1  |
| Pik3cg   | 0.3  | 0.0  | 0.0  | 1.5  | 3.2  | 0.0  | 0.3  | 0.1  | 0.1  | 0.2  | 0.1  | 0.2  |
| Pik3ip1  | 8.4  | 9.0  | 11.1 | 7.7  | 4.9  | 13.2 | 4.1  | 9.5  | 6.4  | 9.0  | 6.2  | 7.2  |
| Pik3r1   | 15.4 | 19.5 | 26.8 | 17.7 | 23.8 | 15.2 | 22.6 | 24.1 | 21.6 | 16.6 | 19.4 | 23.8 |
| Pik3r2   | 14.3 | 14.1 | 12.3 | 14.5 | 11.7 | 15.2 | 15.6 | 16.3 | 14.6 | 16.1 | 14.0 | 14.4 |
| Pik3r3   | 9.3  | 8.6  | 11.1 | 10.5 | 12.6 | 7.2  | 12.7 | 13.7 | 12.9 | 16.4 | 16.9 | 17.5 |
| Pik3r4   | 10.3 | 10.9 | 11.4 | 9.8  | 9.7  | 10.0 | 9.7  | 10.2 | 9.7  | 8.9  | 8.6  | 9.5  |
| Pik3r5   | 0.6  | 0.2  | 0.1  | 2.5  | 4.8  | 0.3  | 0.8  | 0.2  | 0.2  | 0.4  | 0.2  | 0.5  |
| Pik3r6   | 0.1  | 0.0  | 0.0  | 0.3  | 0.8  | 0.0  | 0.1  | 0.1  | 0.0  | 0.0  | 0.0  | 0.0  |
| Pikfyve  | 6.9  | 7.3  | 6.7  | 6.6  | 6.3  | 6.8  | 5.7  | 6.5  | 6.1  | 6.3  | 6.6  | 6.7  |
| Pilra    | 1.2  | 0.1  | 0.2  | 8.0  | 18.4 | 0.1  | 2.2  | 0.2  | 0.7  | 1.3  | 0.5  | 1.2  |
| Pilrb1   | 0.5  | 0.0  | 0.0  | 5.3  | 9.7  | 0.0  | 0.8  | 0.0  | 0.1  | 0.8  | 0.1  | 0.6  |
| Pilrb2   | 0.3  | 0.0  | 0.0  | 3.0  | 5.0  | 0.0  | 0.5  | 0.1  | 0.1  | 0.3  | 0.0  | 0.3  |
| Pim1     | 7.2  | 8.1  | 9.5  | 7.9  | 10.4 | 6.1  | 6.7  | 8.8  | 7.4  | 7.8  | 6.0  | 7.7  |
| Pim2     | 1.0  | 1.2  | 1.0  | 1.1  | 1.3  | 1.1  | 1.6  | 0.9  | 1.0  | 1.0  | 1.0  | 0.7  |
| Pim3     | 6.5  | 8.0  | 6.4  | 3.6  | 4.3  | 5.1  | 5.6  | 6.9  | 8.5  | 9.2  | 6.8  | 7.4  |
| Pin1     | 12.6 | 10.9 | 7.8  | 12.3 | 10.4 | 10.1 | 10.4 | 8.8  | 9.8  | 10.8 | 10.2 | 8.6  |
| Pin1-ps1 | 0.0  | 0.3  | 0.0  | 0.1  | 0.0  | 0.0  | 0.0  | 0.0  | 0.1  | 0.1  | 0.0  | 0.0  |
| Pin4     | 60.3 | 49.2 | 50.5 | 63.3 | 47.5 | 59.3 | 44.7 | 39.5 | 35.0 | 49.7 | 54.6 | 53.3 |
| Pink1    | 49.0 | 41.4 | 35.0 | 53.7 | 34.8 | 63.8 | 43.1 | 35.6 | 41.1 | 42.7 | 40.2 | 44.7 |
| Pinx1    | 8.2  | 6.1  | 7.5  | 12.0 | 7.5  | 8.2  | 8.0  | 7.1  | 4.9  | 6.5  | 8.6  | 7.9  |
| Pion     | 1.4  | 1.0  | 1.2  | 2.6  | 6.1  | 1.7  | 1.4  | 0.7  | 0.9  | 1.1  | 1.0  | 1.1  |
| Pip4k2a  | 13.1 | 14.3 | 14.2 | 19.8 | 15.4 | 15.6 | 15.0 | 12.0 | 14.0 | 12.5 | 15.6 | 15.8 |
| Pip4k2b  | 17.6 | 18.2 | 16.7 | 19.9 | 17.0 | 18.9 | 17.7 | 14.3 | 14.8 | 15.7 | 17.0 | 15.1 |
| Pip4k2c  | 13.0 | 11.6 | 11.7 | 15.4 | 11.7 | 16.5 | 11.7 | 9.5  | 10.9 | 10.9 | 9.7  | 11.2 |
| Pip5k1a  | 16.2 | 15.1 | 16.4 | 15.6 | 14.0 | 14.3 | 16.8 | 16.5 | 17.1 | 16.6 | 15.8 | 17.3 |
| Pip5k1b  | 0.0  | 0.0  | 0.0  | 0.1  | 0.0  | 0.0  | 0.1  | 0.1  | 0.0  | 0.0  | 0.0  | 0.0  |
| Pip5k1c  | 14.2 | 13.3 | 10.8 | 19.0 | 15.7 | 16.6 | 15.7 | 11.8 | 12.4 | 11.3 | 13.0 | 10.8 |
| Pipox    | 0.1  | 0.0  | 0.0  | 0.0  | 0.0  | 0.0  | 0.0  | 0.0  | 0.0  | 0.0  | 0.0  | 0.0  |

Online Table 1



|          |       |       |       |       |       |       |       |       |       |       |       |       |
|----------|-------|-------|-------|-------|-------|-------|-------|-------|-------|-------|-------|-------|
| Pir      | 21.2  | 23.2  | 22.9  | 21.6  | 15.4  | 24.3  | 19.9  | 23.0  | 19.1  | 13.3  | 15.6  | 17.9  |
| Pira1    | 0.0   | 0.0   | 0.0   | 0.2   | 0.1   | 0.0   | 0.0   | 0.0   | 0.0   | 0.0   | 0.0   | 0.0   |
| Pira11   | 0.0   | 0.0   | 0.0   | 2.0   | 2.8   | 0.0   | 0.4   | 0.0   | 0.1   | 0.2   | 0.1   | 0.2   |
| Pira2    | 0.2   | 0.0   | 0.0   | 1.8   | 2.9   | 0.0   | 0.3   | 0.1   | 0.1   | 0.2   | 0.0   | 0.2   |
| Pira4    | 0.2   | 0.0   | 0.0   | 1.6   | 0.0   | 0.0   | 0.2   | 0.0   | 0.0   | 0.1   | 0.1   | 0.1   |
| Pira6    | 0.2   | 0.0   | 0.0   | 1.6   | 2.1   | 0.0   | 0.2   | 0.0   | 0.0   | 0.2   | 0.1   | 0.2   |
| Pira7    | 0.0   | 0.0   | 0.0   | 0.0   | 1.9   | 0.0   | 0.0   | 0.0   | 0.0   | 0.0   | 0.0   | 0.0   |
| Pisd     | 20.1  | 16.8  | 15.5  | 23.7  | 20.8  | 19.3  | 18.4  | 16.9  | 19.2  | 18.2  | 17.8  | 17.1  |
| Pisd-ps1 | 35.9  | 37.1  | 30.4  | 31.8  | 29.4  | 40.5  | 32.0  | 22.5  | 33.5  | 29.9  | 29.9  | 26.7  |
| Pisd-ps2 | 8.2   | 9.1   | 6.9   | 7.8   | 7.4   | 11.0  | 6.5   | 5.7   | 9.7   | 6.6   | 5.8   | 7.1   |
| Pithd1   | 8.7   | 9.8   | 8.7   | 9.9   | 8.4   | 10.7  | 9.4   | 9.4   | 9.4   | 7.8   | 9.2   | 9.1   |
| Pitpna   | 30.8  | 24.7  | 24.2  | 39.8  | 38.0  | 28.8  | 35.6  | 27.1  | 27.1  | 30.4  | 35.2  | 34.0  |
| Pitpnb   | 10.7  | 13.1  | 13.3  | 12.3  | 12.8  | 12.5  | 14.7  | 14.1  | 13.8  | 13.1  | 14.3  | 12.7  |
| Pitpnc1  | 1.4   | 1.4   | 1.4   | 1.7   | 1.9   | 1.3   | 1.0   | 0.8   | 0.9   | 1.4   | 1.4   | 1.0   |
| Pitpnm1  | 6.9   | 6.8   | 6.0   | 7.9   | 7.3   | 8.7   | 6.4   | 5.1   | 5.9   | 5.0   | 5.5   | 4.9   |
| Pitpnm2  | 1.7   | 2.1   | 2.0   | 1.6   | 1.7   | 2.1   | 1.8   | 1.9   | 1.6   | 1.7   | 1.5   | 1.4   |
| Pitpnm3  | 0.0   | 0.0   | 0.1   | 0.0   | 0.0   | 0.0   | 0.0   | 0.0   | 0.0   | 0.0   | 0.0   | 0.0   |
| Pitrm1   | 22.6  | 21.2  | 22.9  | 25.1  | 23.0  | 27.1  | 23.0  | 22.1  | 21.5  | 18.6  | 24.8  | 21.1  |
| Pitx1    | 0.0   | 0.0   | 0.0   | 0.0   | 0.0   | 0.0   | 0.0   | 0.0   | 0.1   | 0.0   | 0.0   | 0.0   |
| Pitx2    | 0.1   | 0.1   | 0.0   | 0.2   | 0.0   | 0.3   | 0.1   | 0.1   | 0.1   | 0.3   | 0.3   | 0.3   |
| Piwil2   | 0.4   | 0.3   | 0.2   | 0.3   | 0.2   | 0.2   | 0.2   | 0.3   | 0.1   | 0.3   | 0.2   | 0.2   |
| Piwil4   | 0.2   | 0.2   | 0.1   | 0.4   | 0.2   | 0.2   | 0.2   | 0.1   | 0.1   | 0.2   | 0.1   | 0.1   |
| Pja1     | 23.3  | 21.2  | 20.3  | 24.7  | 18.4  | 25.0  | 20.9  | 19.6  | 19.7  | 25.0  | 24.7  | 22.3  |
| Pja2     | 39.1  | 43.2  | 41.4  | 44.6  | 38.0  | 45.3  | 44.1  | 38.1  | 37.7  | 41.0  | 46.1  | 47.1  |
| Pkd1     | 11.2  | 11.7  | 11.0  | 10.2  | 12.3  | 12.1  | 16.3  | 15.1  | 15.9  | 10.5  | 10.6  | 10.3  |
| Pkd1I2   | 0.0   | 0.0   | 0.0   | 0.0   | 0.1   | 0.1   | 0.0   | 0.0   | 0.0   | 0.0   | 0.0   | 0.0   |
| Pkd1I3   | 0.0   | 0.0   | 0.0   | 0.0   | 0.0   | 0.0   | 0.0   | 0.0   | 0.0   | 0.0   | 0.0   | 0.0   |
| Pkd2     | 43.8  | 38.9  | 41.9  | 47.9  | 41.6  | 49.8  | 51.3  | 40.1  | 43.3  | 34.5  | 42.3  | 45.1  |
| Pkd2I2   | 0.2   | 0.3   | 0.2   | 0.1   | 0.4   | 0.2   | 0.2   | 0.2   | 0.2   | 0.5   | 0.3   | 0.3   |
| Pkdcc    | 1.7   | 2.9   | 2.6   | 1.6   | 2.1   | 1.7   | 2.4   | 3.0   | 3.8   | 7.4   | 3.1   | 3.3   |
| Pkdrej   | 0.1   | 0.2   | 0.1   | 0.1   | 0.1   | 0.2   | 0.0   | 0.1   | 0.1   | 0.1   | 0.1   | 0.1   |
| Pkhd1    | 0.1   | 0.0   | 0.0   | 0.1   | 0.0   | 0.0   | 0.0   | 0.0   | 0.0   | 0.0   | 0.0   | 0.0   |
| Pkhd1I1  | 9.7   | 2.8   | 1.4   | 0.6   | 0.5   | 0.5   | 0.3   | 1.5   | 1.1   | 20.7  | 9.5   | 4.2   |
| Pkia     | 13.8  | 11.4  | 11.6  | 10.9  | 8.8   | 10.6  | 10.1  | 8.8   | 12.1  | 12.8  | 13.1  | 16.6  |
| Pkib     | 0.2   | 0.0   | 0.0   | 0.2   | 0.2   | 0.0   | 0.1   | 0.0   | 0.0   | 0.0   | 0.0   | 0.0   |
| Pkig     | 34.3  | 42.4  | 39.6  | 30.8  | 31.8  | 27.5  | 33.1  | 30.7  | 44.3  | 28.1  | 28.4  | 35.2  |
| Pkm      | 432.4 | 382.5 | 327.7 | 588.7 | 614.5 | 425.3 | 421.9 | 405.2 | 310.0 | 398.1 | 382.0 | 351.3 |
| Pkmyt1   | 0.5   | 1.1   | 1.6   | 0.6   | 1.2   | 0.8   | 2.7   | 1.9   | 2.4   | 0.8   | 1.1   | 0.7   |
| Pkn1     | 20.4  | 15.2  | 11.6  | 20.2  | 16.7  | 17.7  | 16.2  | 12.8  | 14.3  | 14.6  | 14.6  | 13.7  |
| Pkn2     | 20.1  | 22.5  | 20.9  | 18.5  | 16.3  | 20.5  | 17.6  | 17.9  | 19.1  | 18.8  | 22.8  | 21.2  |
| Pkn3     | 0.6   | 0.8   | 1.2   | 0.4   | 0.8   | 0.6   | 1.0   | 0.5   | 0.8   | 0.5   | 0.6   | 0.5   |
| Pknox1   | 3.4   | 4.0   | 3.6   | 3.9   | 3.8   | 3.7   | 3.1   | 3.3   | 3.6   | 4.9   | 4.1   | 3.9   |
| Pknox2   | 3.8   | 5.2   | 8.7   | 3.5   | 5.1   | 2.5   | 5.9   | 8.9   | 5.9   | 3.0   | 3.7   | 4.6   |
| Pkp1     | 0.4   | 0.0   | 0.1   | 0.0   | 0.0   | 0.0   | 0.0   | 0.2   | 0.0   | 0.2   | 0.0   | 0.1   |
| Pkp2     | 2.1   | 0.6   | 0.3   | 1.9   | 0.8   | 1.5   | 0.5   | 0.3   | 0.6   | 3.1   | 1.7   | 0.9   |
| Pkp3     | 0.5   | 0.4   | 0.2   | 0.2   | 0.4   | 0.3   | 0.1   | 0.1   | 0.2   | 0.2   | 0.2   | 0.2   |
| Pkp4     | 9.0   | 9.3   | 9.3   | 10.6  | 10.1  | 10.3  | 11.2  | 7.6   | 8.5   | 8.4   | 11.6  | 9.3   |
| Pla1a    | 20.9  | 17.6  | 12.4  | 27.2  | 18.9  | 28.4  | 14.9  | 3.8   | 9.5   | 17.0  | 13.8  | 17.2  |
| Pla2g12a | 16.1  | 11.7  | 9.3   | 17.1  | 10.5  | 17.4  | 10.1  | 9.2   | 8.9   | 11.9  | 10.7  | 10.7  |
| Pla2g15  | 11.9  | 10.8  | 11.8  | 12.2  | 14.3  | 12.4  | 14.2  | 11.9  | 15.9  | 17.6  | 14.4  | 18.8  |
| Pla2g16  | 6.3   | 6.0   | 7.1   | 7.2   | 6.1   | 7.2   | 5.9   | 7.6   | 6.5   | 6.0   | 6.3   | 7.7   |
| Pla2g2c  | 0.0   | 0.0   | 0.0   | 0.0   | 0.0   | 0.0   | 0.0   | 0.0   | 0.0   | 0.0   | 0.0   | 0.0   |
| Pla2g2e  | 1.8   | 1.2   | 0.4   | 1.3   | 1.3   | 2.4   | 0.6   | 0.8   | 0.2   | 0.4   | 0.5   | 0.2   |
| Pla2g3   | 0.1   | 0.0   | 0.0   | 0.0   | 0.0   | 0.0   | 0.0   | 0.1   | 0.0   | 0.0   | 0.0   | 0.0   |
| Pla2g4a  | 18.6  | 12.4  | 11.2  | 18.5  | 22.3  | 14.8  | 9.6   | 10.3  | 8.5   | 18.9  | 15.5  | 14.6  |
| Pla2g4b  | 0.3   | 0.2   | 0.4   | 0.3   | 0.2   | 0.2   | 0.4   | 0.3   | 0.4   | 0.3   | 0.3   | 0.2   |
| Pla2g4c  | 0.0   | 0.0   | 0.0   | 0.0   | 0.1   | 0.0   | 0.1   | 0.1   | 0.0   | 0.1   | 0.1   | 0.1   |

Online Table 1

|         |       |      |      |       |      |      |      |      |      |      |      |       |
|---------|-------|------|------|-------|------|------|------|------|------|------|------|-------|
| Pla2g4f | 0.0   | 0.0  | 0.0  | 0.0   | 0.0  | 0.0  | 0.0  | 0.0  | 0.0  | 0.0  | 0.1  | 0.0   |
| Pla2g5  | 1.1   | 0.4  | 0.3  | 0.8   | 0.5  | 0.6  | 0.1  | 0.2  | 0.1  | 0.2  | 0.1  | 0.3   |
| Pla2g6  | 4.5   | 4.7  | 3.4  | 5.2   | 4.0  | 4.5  | 4.6  | 3.8  | 4.3  | 4.5  | 4.7  | 3.7   |
| Pla2g7  | 2.7   | 0.1  | 0.3  | 5.8   | 9.8  | 0.1  | 0.6  | 0.8  | 0.4  | 0.7  | 0.3  | 0.5   |
| Pla2r1  | 9.6   | 8.8  | 8.1  | 9.1   | 8.4  | 12.0 | 9.1  | 7.9  | 8.8  | 6.3  | 7.8  | 7.7   |
| Plaa    | 16.2  | 14.1 | 13.7 | 17.1  | 14.5 | 15.6 | 15.6 | 13.4 | 13.4 | 14.4 | 17.1 | 16.6  |
| Plac8   | 6.6   | 16.5 | 32.6 | 5.3   | 15.2 | 11.6 | 69.8 | 35.0 | 62.6 | 93.6 | 87.0 | 109.2 |
| Plac9a  | 103.1 | 75.1 | 59.8 | 106.2 | 55.7 | 95.5 | 67.3 | 58.5 | 52.9 | 31.4 | 57.4 | 42.6  |
| Plac9b  | 33.2  | 20.3 | 17.6 | 37.2  | 19.2 | 28.9 | 20.0 | 33.0 | 16.6 | 8.7  | 21.3 | 12.8  |
| Plag1   | 0.5   | 0.2  | 0.1  | 0.4   | 0.2  | 0.6  | 0.3  | 0.3  | 0.3  | 0.4  | 0.7  | 0.6   |
| Plagl1  | 0.1   | 0.1  | 0.1  | 0.2   | 0.2  | 0.1  | 0.2  | 0.5  | 0.6  | 0.7  | 0.7  | 0.6   |
| Plagl2  | 0.5   | 0.7  | 0.8  | 0.6   | 1.2  | 0.7  | 0.8  | 0.9  | 0.7  | 0.5  | 0.8  | 0.6   |
| Plat    | 14.7  | 10.1 | 12.7 | 8.4   | 9.5  | 8.5  | 8.5  | 14.6 | 7.6  | 18.2 | 10.5 | 14.6  |
| Plau    | 6.8   | 7.0  | 5.5  | 10.3  | 16.2 | 5.0  | 5.5  | 3.4  | 4.4  | 12.5 | 6.2  | 3.8   |
| Plaur   | 6.0   | 2.5  | 1.5  | 8.8   | 11.9 | 4.3  | 7.1  | 2.9  | 4.4  | 10.6 | 7.7  | 5.1   |
| Plb1    | 0.2   | 0.1  | 0.2  | 0.4   | 0.1  | 0.1  | 0.2  | 0.1  | 0.1  | 0.2  | 0.1  | 0.1   |
| Plbd1   | 0.1   | 0.0  | 0.0  | 0.1   | 1.3  | 0.0  | 0.3  | 0.1  | 0.1  | 0.0  | 0.0  | 0.1   |
| Plbd2   | 14.8  | 13.0 | 12.8 | 13.8  | 14.8 | 14.4 | 14.1 | 14.0 | 13.7 | 11.6 | 10.8 | 12.0  |
| Plcb1   | 1.5   | 1.3  | 1.4  | 1.1   | 0.9  | 1.0  | 1.2  | 1.3  | 1.1  | 1.2  | 1.7  | 1.5   |
| Plcb2   | 0.1   | 0.0  | 0.0  | 1.3   | 1.8  | 0.0  | 0.1  | 0.0  | 0.0  | 0.1  | 0.0  | 0.1   |
| Plcb3   | 19.6  | 21.2 | 22.5 | 21.5  | 20.2 | 21.3 | 22.5 | 18.0 | 18.1 | 16.0 | 20.1 | 18.4  |
| Plcb4   | 22.1  | 21.2 | 24.1 | 17.4  | 18.2 | 18.4 | 22.3 | 24.8 | 24.6 | 15.3 | 27.7 | 22.7  |
| Plcd1   | 16.3  | 14.3 | 15.4 | 15.0  | 11.7 | 17.2 | 15.5 | 14.7 | 15.0 | 14.0 | 13.5 | 14.4  |
| Plcd3   | 2.8   | 3.2  | 2.1  | 1.6   | 2.0  | 2.4  | 2.0  | 2.1  | 2.1  | 2.2  | 1.7  | 1.8   |
| Plcd4   | 0.0   | 0.1  | 0.0  | 0.0   | 0.1  | 0.0  | 0.0  | 0.1  | 0.0  | 0.3  | 0.1  | 0.1   |
| Plce1   | 1.7   | 2.3  | 3.4  | 1.1   | 1.5  | 1.5  | 2.1  | 3.4  | 3.2  | 4.4  | 3.9  | 4.4   |
| Plcg1   | 15.1  | 13.4 | 11.9 | 13.9  | 9.9  | 14.9 | 12.1 | 12.1 | 11.4 | 10.5 | 11.8 | 11.3  |
| Plcg2   | 5.7   | 3.5  | 3.2  | 11.7  | 14.1 | 5.5  | 5.6  | 2.1  | 2.5  | 4.6  | 3.9  | 4.3   |
| Plch1   | 0.0   | 0.0  | 0.0  | 0.0   | 0.0  | 0.0  | 0.1  | 0.0  | 0.0  | 0.2  | 0.0  | 0.0   |
| Plch2   | 0.1   | 0.2  | 0.2  | 0.1   | 0.1  | 0.2  | 0.1  | 0.1  | 0.2  | 0.1  | 0.1  | 0.2   |
| Plcl1   | 2.8   | 3.4  | 4.5  | 2.2   | 2.7  | 2.4  | 2.8  | 4.7  | 3.9  | 6.0  | 4.7  | 4.6   |
| Plcl2   | 1.4   | 2.2  | 2.5  | 2.7   | 2.6  | 2.0  | 1.5  | 2.3  | 1.3  | 1.1  | 1.3  | 1.4   |
| Plcxd1  | 0.5   | 0.4  | 0.4  | 0.3   | 0.3  | 0.5  | 0.5  | 0.2  | 0.5  | 0.3  | 0.4  | 0.3   |
| Plcxd2  | 2.8   | 3.9  | 3.5  | 2.6   | 3.3  | 2.4  | 4.7  | 3.3  | 6.2  | 4.3  | 4.7  | 5.3   |
| Plcxd3  | 0.0   | 0.0  | 0.0  | 0.0   | 0.0  | 0.0  | 0.0  | 0.0  | 0.0  | 0.0  | 0.0  | 0.0   |
| Pld1    | 5.2   | 5.1  | 5.2  | 3.5   | 4.5  | 4.2  | 4.2  | 4.4  | 4.3  | 5.2  | 5.7  | 5.0   |
| Pld2    | 4.7   | 5.5  | 5.8  | 4.6   | 6.1  | 5.2  | 5.6  | 7.1  | 6.9  | 5.8  | 5.9  | 5.6   |
| Pld3    | 62.2  | 57.2 | 64.1 | 71.5  | 66.3 | 72.8 | 53.4 | 65.0 | 49.3 | 51.1 | 47.7 | 56.3  |
| Pld4    | 2.4   | 0.1  | 0.2  | 20.3  | 40.6 | 0.1  | 5.5  | 0.6  | 0.7  | 2.3  | 0.7  | 1.1   |
| Pld6    | 0.1   | 0.3  | 0.1  | 0.1   | 0.1  | 0.2  | 0.3  | 0.2  | 0.1  | 0.1  | 0.2  | 0.1   |
| Plec    | 36.4  | 37.8 | 33.6 | 33.3  | 44.2 | 30.7 | 49.5 | 42.6 | 42.3 | 32.5 | 35.5 | 26.9  |
| Plek    | 2.6   | 0.8  | 1.2  | 14.3  | 22.6 | 1.1  | 3.9  | 1.1  | 1.4  | 2.7  | 1.6  | 2.3   |
| Plek2   | 0.2   | 0.2  | 0.2  | 0.3   | 0.4  | 0.0  | 0.1  | 0.1  | 0.0  | 0.3  | 0.1  | 0.1   |
| Plekha1 | 7.2   | 6.9  | 7.1  | 8.5   | 7.6  | 7.3  | 7.7  | 7.9  | 8.3  | 7.5  | 9.0  | 9.0   |
| Plekha2 | 16.1  | 17.1 | 14.2 | 20.0  | 19.3 | 18.6 | 17.8 | 11.3 | 19.7 | 15.1 | 16.7 | 16.7  |
| Plekha3 | 20.7  | 18.0 | 18.7 | 27.8  | 19.8 | 22.3 | 23.4 | 17.9 | 18.3 | 18.0 | 22.9 | 20.4  |
| Plekha4 | 1.3   | 1.3  | 1.9  | 1.0   | 1.1  | 1.3  | 0.7  | 1.2  | 1.1  | 1.0  | 0.4  | 1.2   |
| Plekha5 | 2.0   | 2.7  | 3.3  | 2.0   | 1.8  | 2.3  | 2.3  | 2.4  | 2.2  | 2.0  | 2.0  | 2.3   |
| Plekha6 | 0.4   | 0.6  | 1.2  | 0.3   | 0.4  | 0.3  | 0.2  | 0.4  | 0.2  | 0.1  | 0.2  | 0.1   |
| Plekha7 | 9.5   | 11.1 | 11.0 | 5.0   | 7.4  | 4.0  | 11.9 | 12.4 | 10.2 | 9.1  | 12.4 | 11.5  |
| Plekha8 | 2.7   | 3.3  | 3.6  | 2.6   | 2.7  | 2.2  | 2.7  | 3.3  | 3.3  | 3.0  | 3.1  | 3.4   |
| Plekha1 | 0.3   | 0.3  | 0.6  | 0.1   | 0.4  | 0.1  | 0.3  | 0.2  | 0.5  | 0.9  | 0.4  | 0.6   |
| Plekha2 | 25.5  | 21.8 | 16.7 | 32.5  | 25.0 | 28.5 | 18.7 | 12.1 | 14.3 | 22.7 | 20.1 | 16.5  |
| Plekha3 | 0.0   | 0.0  | 0.0  | 0.0   | 0.0  | 0.0  | 0.0  | 0.0  | 0.0  | 0.0  | 0.0  | 0.0   |
| Plekha4 | 15.9  | 13.4 | 13.5 | 17.1  | 15.2 | 12.4 | 16.6 | 15.8 | 17.1 | 18.3 | 17.3 | 18.8  |
| Plekha5 | 3.6   | 3.6  | 3.8  | 4.1   | 4.8  | 3.0  | 3.4  | 3.9  | 4.5  | 3.5  | 3.5  | 3.5   |
| Plekha6 | 1.1   | 1.1  | 1.4  | 1.1   | 1.8  | 0.8  | 1.2  | 1.0  | 0.7  | 0.8  | 1.0  | 0.8   |

Online Table 1

|         |       |       |       |       |       |       |       |       |       |       |       |       |
|---------|-------|-------|-------|-------|-------|-------|-------|-------|-------|-------|-------|-------|
| Plekhg2 | 9.7   | 18.9  | 20.3  | 8.6   | 12.1  | 9.6   | 17.3  | 18.4  | 21.3  | 11.8  | 14.1  | 12.0  |
| Plekhg3 | 5.5   | 6.4   | 6.5   | 4.9   | 6.5   | 5.1   | 9.2   | 7.8   | 9.2   | 12.9  | 11.3  | 9.3   |
| Plekhg4 | 0.0   | 0.0   | 0.1   | 0.0   | 0.1   | 0.1   | 0.1   | 0.1   | 0.1   | 0.2   | 0.2   | 0.1   |
| Plekhg5 | 6.3   | 9.4   | 10.2  | 4.4   | 6.4   | 6.3   | 9.2   | 11.4  | 10.9  | 7.4   | 7.7   | 9.3   |
| Plekhg6 | 0.1   | 0.2   | 0.1   | 0.2   | 0.2   | 0.1   | 0.2   | 0.1   | 0.2   | 0.2   | 0.1   | 0.2   |
| Plekhh1 | 0.2   | 0.3   | 0.2   | 0.2   | 0.2   | 0.2   | 0.2   | 0.2   | 0.2   | 0.2   | 0.2   | 0.1   |
| Plekhh2 | 4.4   | 6.5   | 6.4   | 4.0   | 3.9   | 4.2   | 3.5   | 3.8   | 3.2   | 6.3   | 4.3   | 3.3   |
| Plekhh3 | 2.9   | 2.7   | 2.4   | 2.5   | 2.0   | 2.8   | 3.2   | 4.3   | 4.0   | 3.0   | 3.0   | 2.3   |
| Plekhj1 | 11.9  | 10.4  | 10.2  | 12.4  | 11.2  | 13.2  | 11.0  | 10.9  | 13.0  | 11.9  | 11.8  | 11.5  |
| Plekhn1 | 2.5   | 3.2   | 3.5   | 3.6   | 4.9   | 3.0   | 3.1   | 3.1   | 2.9   | 2.5   | 2.5   | 2.5   |
| Plekhn2 | 6.5   | 6.4   | 6.0   | 7.7   | 6.5   | 7.5   | 7.4   | 6.9   | 6.4   | 6.0   | 6.2   | 6.8   |
| Plekhn3 | 3.2   | 4.2   | 3.9   | 3.9   | 5.0   | 3.1   | 3.6   | 3.6   | 3.5   | 3.1   | 3.1   | 3.4   |
| Plekho1 | 1.1   | 1.5   | 1.3   | 1.2   | 1.7   | 1.4   | 1.1   | 1.1   | 0.7   | 0.7   | 0.7   | 0.8   |
| Plekho2 | 5.4   | 4.6   | 4.0   | 12.3  | 14.6  | 7.4   | 6.8   | 5.6   | 6.1   | 10.4  | 11.3  | 8.2   |
| Plekho3 | 26.7  | 26.1  | 20.6  | 32.0  | 31.1  | 25.9  | 32.5  | 29.7  | 30.5  | 24.9  | 27.5  | 26.1  |
| Plekhs1 | 0.2   | 0.2   | 0.0   | 0.4   | 0.1   | 0.2   | 0.0   | 0.0   | 0.1   | 0.0   | 0.0   | 0.0   |
| Plgrkt  | 33.0  | 30.7  | 27.8  | 29.3  | 25.4  | 32.6  | 28.6  | 23.6  | 28.0  | 27.8  | 28.3  | 27.2  |
| Plin1   | 0.0   | 0.0   | 0.0   | 0.0   | 0.0   | 0.0   | 0.0   | 0.0   | 0.0   | 0.0   | 0.0   | 0.0   |
| Plin2   | 49.4  | 42.7  | 30.8  | 100.5 | 89.0  | 50.7  | 39.5  | 38.1  | 35.7  | 52.0  | 40.9  | 37.6  |
| Plin3   | 48.2  | 43.5  | 35.4  | 53.0  | 36.1  | 55.4  | 33.1  | 35.3  | 33.5  | 34.8  | 37.4  | 34.5  |
| Plin4   | 1.5   | 0.8   | 0.7   | 1.3   | 0.3   | 1.5   | 0.2   | 0.6   | 0.2   | 0.2   | 0.3   | 0.4   |
| Plin5   | 0.0   | 0.1   | 0.0   | 0.0   | 0.0   | 0.0   | 0.0   | 0.0   | 0.0   | 0.0   | 0.0   | 0.0   |
| Plk1    | 1.7   | 2.9   | 6.2   | 0.6   | 5.3   | 0.3   | 7.7   | 2.2   | 5.6   | 1.9   | 3.6   | 3.1   |
| Plk1s1  | 16.5  | 12.8  | 14.9  | 15.3  | 11.2  | 17.4  | 12.5  | 11.5  | 10.6  | 13.3  | 14.7  | 15.0  |
| Plk2    | 47.8  | 23.9  | 19.8  | 47.9  | 42.8  | 34.6  | 34.7  | 18.3  | 24.3  | 55.3  | 42.9  | 30.7  |
| Plk3    | 4.2   | 3.5   | 2.9   | 4.7   | 7.3   | 3.5   | 5.3   | 2.7   | 3.6   | 6.3   | 3.8   | 3.6   |
| Plk4    | 3.0   | 4.4   | 5.4   | 2.5   | 5.0   | 2.7   | 5.6   | 3.2   | 4.9   | 3.1   | 4.2   | 3.5   |
| Plk5    | 0.0   | 0.1   | 0.0   | 0.0   | 0.0   | 0.0   | 0.0   | 0.0   | 0.0   | 0.0   | 0.0   | 0.0   |
| Plip    | 0.3   | 0.4   | 0.1   | 0.2   | 0.1   | 0.2   | 0.1   | 0.1   | 0.1   | 0.1   | 0.1   | 0.2   |
| Pln     | 0.1   | 0.1   | 0.1   | 0.0   | 0.0   | 0.0   | 0.1   | 0.1   | 0.0   | 0.0   | 0.0   | 0.1   |
| Plod1   | 25.5  | 24.6  | 24.0  | 24.5  | 27.7  | 24.8  | 22.9  | 25.3  | 24.1  | 22.2  | 19.8  | 19.3  |
| Plod2   | 277.2 | 338.9 | 386.7 | 219.0 | 245.0 | 245.2 | 253.7 | 292.0 | 326.1 | 295.8 | 319.7 | 396.1 |
| Plod3   | 74.1  | 82.7  | 85.8  | 86.8  | 81.9  | 91.2  | 97.7  | 107.1 | 99.5  | 76.1  | 78.1  | 76.5  |
| Plp1    | 0.2   | 0.1   | 0.1   | 0.1   | 0.1   | 0.1   | 0.2   | 0.5   | 0.2   | 0.3   | 0.1   | 0.2   |
| Plp2    | 38.7  | 34.8  | 33.7  | 55.2  | 55.6  | 48.7  | 51.1  | 63.0  | 43.7  | 37.5  | 50.1  | 41.0  |
| Plrg1   | 28.0  | 30.4  | 26.8  | 28.8  | 26.7  | 29.0  | 25.5  | 27.9  | 24.1  | 29.0  | 28.1  | 24.9  |
| Pls1    | 0.3   | 0.2   | 0.2   | 0.0   | 0.2   | 0.2   | 0.0   | 0.0   | 0.0   | 0.1   | 0.1   | 0.1   |
| Pls3    | 123.9 | 104.3 | 88.5  | 98.9  | 94.9  | 97.2  | 94.4  | 90.6  | 111.7 | 113.1 | 120.8 | 137.1 |
| Plscr1  | 13.2  | 11.7  | 12.4  | 9.6   | 14.5  | 10.1  | 12.7  | 10.7  | 12.8  | 20.0  | 15.7  | 16.8  |
| Plscr2  | 31.0  | 30.5  | 26.8  | 28.0  | 33.3  | 20.5  | 30.7  | 23.5  | 34.4  | 50.8  | 42.1  | 40.3  |
| Plscr3  | 8.6   | 8.8   | 8.8   | 9.9   | 9.0   | 8.6   | 9.9   | 12.8  | 9.7   | 8.6   | 9.3   | 6.9   |
| Plscr4  | 5.4   | 6.6   | 8.0   | 7.6   | 6.2   | 7.9   | 7.3   | 6.6   | 6.2   | 4.9   | 6.3   | 7.4   |
| Pltp    | 47.5  | 29.5  | 28.7  | 27.0  | 27.9  | 36.5  | 20.0  | 23.0  | 24.6  | 22.4  | 20.7  | 28.7  |
| Plvap   | 0.7   | 0.1   | 0.3   | 0.3   | 0.6   | 0.3   | 0.3   | 0.6   | 0.3   | 0.2   | 0.1   | 0.2   |
| Plxdc1  | 0.1   | 0.0   | 0.0   | 0.7   | 0.8   | 0.0   | 0.1   | 0.0   | 0.0   | 0.0   | 0.1   | 0.0   |
| Plxdc2  | 27.4  | 26.8  | 34.3  | 31.2  | 31.5  | 31.4  | 40.9  | 38.1  | 39.2  | 37.7  | 37.7  | 40.2  |
| Plxna1  | 18.3  | 18.0  | 16.3  | 23.5  | 25.5  | 21.7  | 26.3  | 20.0  | 22.9  | 19.3  | 20.1  | 16.0  |
| Plxna2  | 2.0   | 1.8   | 3.4   | 1.4   | 2.3   | 1.2   | 3.0   | 6.3   | 4.1   | 2.6   | 2.5   | 5.0   |
| Plxna3  | 0.8   | 1.1   | 1.4   | 0.9   | 0.7   | 2.2   | 0.9   | 0.9   | 1.0   | 1.0   | 0.9   | 0.6   |
| Plxna4  | 1.8   | 1.4   | 2.2   | 0.9   | 1.3   | 0.8   | 1.5   | 3.2   | 2.0   | 6.5   | 3.9   | 2.8   |
| Plxnb1  | 0.5   | 0.4   | 0.6   | 0.2   | 0.5   | 0.3   | 0.5   | 0.5   | 0.9   | 1.9   | 1.0   | 0.9   |
| Plxnb2  | 79.8  | 72.7  | 68.8  | 71.6  | 78.6  | 76.1  | 83.6  | 66.5  | 70.9  | 79.0  | 70.2  | 70.9  |
| Plxnb3  | 0.1   | 0.1   | 0.1   | 0.1   | 0.1   | 0.1   | 0.1   | 0.2   | 0.1   | 0.1   | 0.2   | 0.1   |
| Plxnc1  | 0.6   | 0.8   | 1.5   | 2.4   | 3.6   | 0.3   | 0.6   | 1.2   | 0.6   | 0.7   | 0.4   | 0.7   |
| Plxnd1  | 1.6   | 1.7   | 2.6   | 1.8   | 3.6   | 1.3   | 2.0   | 2.7   | 2.7   | 1.8   | 1.3   | 1.9   |
| Pm20d1  | 2.0   | 1.8   | 1.7   | 0.4   | 1.1   | 0.4   | 0.7   | 0.5   | 0.4   | 0.4   | 0.4   | 0.6   |
| Pm20d2  | 2.1   | 1.3   | 1.7   | 0.9   | 0.6   | 1.2   | 0.6   | 0.7   | 0.4   | 0.7   | 0.6   | 0.9   |

Online Table 1

|         |      |       |       |      |      |      |       |       |       |       |       |       |
|---------|------|-------|-------|------|------|------|-------|-------|-------|-------|-------|-------|
| Pmaip1  | 12.1 | 9.0   | 8.4   | 10.8 | 13.5 | 9.9  | 9.4   | 1.9   | 6.3   | 16.0  | 10.3  | 12.2  |
| Pmel    | 0.5  | 0.4   | 0.6   | 0.3  | 0.2  | 0.6  | 0.3   | 0.5   | 0.5   | 0.4   | 0.5   | 0.2   |
| Pmepa1  | 21.6 | 24.2  | 22.8  | 30.7 | 26.7 | 32.0 | 39.9  | 27.7  | 33.1  | 24.4  | 32.4  | 33.1  |
| Pmf1    | 3.0  | 3.3   | 4.5   | 3.7  | 4.2  | 1.5  | 6.3   | 3.7   | 3.9   | 2.6   | 3.5   | 3.2   |
| Pml     | 6.0  | 6.8   | 7.4   | 5.9  | 7.5  | 6.3  | 8.4   | 4.9   | 5.8   | 6.4   | 5.3   | 6.2   |
| Pmm1    | 43.1 | 36.9  | 43.3  | 31.3 | 35.2 | 35.3 | 38.0  | 43.6  | 40.8  | 51.4  | 42.7  | 46.3  |
| Pmm2    | 12.0 | 9.5   | 9.7   | 14.5 | 12.4 | 11.3 | 14.9  | 10.3  | 11.3  | 12.1  | 13.2  | 13.4  |
| Pmp2    | 0.1  | 0.1   | 0.0   | 0.0  | 0.0  | 0.0  | 0.2   | 0.2   | 0.3   | 0.4   | 1.0   | 0.2   |
| Pmp22   | 90.8 | 115.2 | 147.3 | 72.9 | 95.1 | 81.0 | 182.2 | 242.6 | 234.4 | 106.7 | 171.4 | 163.3 |
| Pmpca   | 19.8 | 18.6  | 17.4  | 22.3 | 19.4 | 19.6 | 21.1  | 17.7  | 17.9  | 17.6  | 20.5  | 18.1  |
| Pmpcb   | 45.0 | 37.8  | 39.6  | 42.9 | 36.9 | 42.4 | 37.4  | 38.5  | 36.0  | 39.0  | 43.4  | 40.2  |
| Pms1    | 1.6  | 1.9   | 2.4   | 2.0  | 1.8  | 2.1  | 2.0   | 2.4   | 1.7   | 2.0   | 2.3   | 2.1   |
| Pms2    | 1.9  | 2.3   | 2.3   | 1.8  | 2.0  | 1.6  | 2.4   | 2.3   | 2.0   | 2.2   | 2.5   | 2.1   |
| Pmvk    | 8.4  | 12.6  | 13.4  | 6.5  | 7.6  | 8.3  | 17.9  | 21.0  | 17.8  | 6.1   | 16.4  | 8.1   |
| Pnck    | 0.7  | 0.4   | 0.3   | 0.0  | 0.3  | 0.8  | 0.6   | 0.2   | 0.2   | 0.8   | 0.7   | 0.5   |
| Pnkd    | 22.3 | 21.1  | 17.5  | 16.4 | 17.3 | 23.4 | 18.3  | 18.7  | 19.0  | 22.0  | 20.4  | 19.2  |
| Pnkp    | 10.5 | 11.8  | 9.6   | 9.4  | 11.7 | 10.7 | 10.4  | 10.4  | 12.0  | 10.5  | 9.1   | 9.7   |
| Pnlc1   | 0.5  | 0.4   | 0.2   | 0.1  | 0.2  | 0.4  | 0.3   | 0.4   | 0.4   | 0.3   | 0.2   | 0.2   |
| Pnma1   | 0.1  | 0.1   | 0.3   | 0.1  | 0.2  | 0.2  | 0.2   | 0.3   | 0.2   | 0.3   | 0.4   | 0.2   |
| Pnma2   | 0.4  | 0.6   | 0.3   | 0.4  | 0.3  | 0.2  | 0.4   | 0.4   | 0.3   | 0.7   | 0.4   | 0.3   |
| Pnmal2  | 0.1  | 0.3   | 0.4   | 0.1  | 0.2  | 0.2  | 0.2   | 0.4   | 0.2   | 0.4   | 0.2   | 0.3   |
| Pnn     | 13.5 | 13.7  | 17.9  | 15.8 | 13.2 | 12.7 | 17.1  | 14.2  | 13.4  | 13.8  | 18.8  | 18.6  |
| Pno1    | 32.1 | 24.3  | 18.5  | 29.7 | 27.6 | 27.9 | 21.1  | 18.9  | 19.5  | 23.7  | 26.4  | 23.0  |
| Pnp     | 59.1 | 68.7  | 79.1  | 42.3 | 61.3 | 33.2 | 53.4  | 68.9  | 58.6  | 69.2  | 61.2  | 67.6  |
| Pnp2    | 8.6  | 9.0   | 12.9  | 7.7  | 7.7  | 5.7  | 8.7   | 11.3  | 8.0   | 9.7   | 11.7  | 11.6  |
| Pnpla1  | 0.0  | 0.0   | 0.0   | 0.0  | 0.0  | 0.1  | 0.0   | 0.0   | 0.0   | 0.0   | 0.0   | 0.0   |
| Pnpla2  | 6.9  | 6.4   | 4.7   | 9.2  | 6.3  | 8.9  | 5.4   | 5.0   | 4.4   | 5.0   | 6.4   | 4.2   |
| Pnpla3  | 0.0  | 0.0   | 0.1   | 0.0  | 0.0  | 0.1  | 0.1   | 0.1   | 0.0   | 0.0   | 0.1   | 0.0   |
| Pnpla6  | 3.9  | 3.9   | 3.5   | 3.9  | 3.2  | 4.4  | 3.5   | 3.1   | 3.1   | 3.6   | 3.3   | 2.8   |
| Pnpla7  | 4.0  | 3.4   | 3.2   | 6.2  | 5.2  | 4.0  | 3.1   | 2.4   | 2.4   | 4.3   | 3.5   | 3.1   |
| Pnpla8  | 19.5 | 19.5  | 18.8  | 19.8 | 16.3 | 21.6 | 17.5  | 17.6  | 19.8  | 18.9  | 23.9  | 22.6  |
| Pnpo    | 2.8  | 2.9   | 2.4   | 2.1  | 2.7  | 2.2  | 1.9   | 2.5   | 2.2   | 4.1   | 2.6   | 3.4   |
| Pnpt1   | 9.6  | 10.8  | 10.7  | 11.5 | 9.7  | 8.1  | 9.0   | 9.7   | 9.4   | 10.7  | 10.2  | 11.0  |
| Pnrc1   | 23.2 | 27.5  | 30.5  | 26.5 | 28.0 | 27.9 | 26.7  | 24.1  | 24.0  | 28.6  | 25.7  | 24.6  |
| Pnrc2   | 28.9 | 30.0  | 38.1  | 34.8 | 28.8 | 30.7 | 32.7  | 37.5  | 36.1  | 32.2  | 39.3  | 43.1  |
| Poc1a   | 1.2  | 1.7   | 2.3   | 1.0  | 1.9  | 0.5  | 2.2   | 1.5   | 1.9   | 1.3   | 1.5   | 1.4   |
| Poc1b   | 0.8  | 1.2   | 1.4   | 0.9  | 1.2  | 1.2  | 0.9   | 1.5   | 1.2   | 1.2   | 1.2   | 1.2   |
| Poc5    | 4.7  | 5.5   | 6.1   | 4.2  | 4.6  | 3.9  | 4.8   | 4.1   | 5.3   | 5.3   | 5.3   | 5.0   |
| Podn    | 2.5  | 9.8   | 18.1  | 0.8  | 2.7  | 1.3  | 2.4   | 14.5  | 6.6   | 9.2   | 4.9   | 5.3   |
| Podn1   | 0.3  | 0.4   | 0.3   | 0.3  | 0.3  | 0.4  | 0.5   | 0.6   | 0.7   | 0.3   | 0.3   | 0.4   |
| Podxl   | 0.2  | 0.1   | 0.2   | 0.1  | 0.1  | 0.1  | 0.2   | 0.4   | 0.2   | 0.7   | 0.3   | 0.3   |
| Podxl2  | 2.3  | 2.6   | 2.1   | 3.9  | 2.4  | 5.1  | 1.7   | 1.8   | 1.9   | 4.0   | 2.5   | 2.7   |
| Pofut1  | 21.6 | 20.3  | 17.0  | 24.4 | 19.2 | 28.9 | 19.8  | 19.5  | 18.4  | 17.6  | 17.5  | 16.5  |
| Pofut2  | 44.7 | 43.1  | 45.9  | 50.2 | 49.7 | 52.6 | 55.0  | 50.0  | 50.9  | 55.5  | 51.8  | 53.6  |
| Pogk    | 6.3  | 5.1   | 4.2   | 7.1  | 5.7  | 7.3  | 4.9   | 4.3   | 4.9   | 4.2   | 5.2   | 4.6   |
| Poglut1 | 31.1 | 26.8  | 23.5  | 30.9 | 25.0 | 30.6 | 25.0  | 23.7  | 23.4  | 25.3  | 26.0  | 27.0  |
| Pogz    | 1.1  | 1.3   | 1.5   | 1.0  | 1.3  | 1.2  | 1.4   | 1.5   | 1.3   | 1.2   | 1.3   | 1.0   |
| Pola1   | 2.4  | 3.5   | 3.7   | 1.8  | 4.1  | 1.6  | 4.2   | 2.5   | 2.9   | 2.1   | 3.3   | 2.4   |
| Pola2   | 3.6  | 3.8   | 4.7   | 3.1  | 3.9  | 3.3  | 4.6   | 3.9   | 3.9   | 2.7   | 4.7   | 3.1   |
| Polb    | 24.6 | 26.7  | 23.9  | 22.9 | 22.2 | 22.4 | 18.1  | 15.9  | 17.0  | 20.5  | 20.4  | 20.4  |
| Pold1   | 1.8  | 3.0   | 3.4   | 2.0  | 3.8  | 1.9  | 3.6   | 2.3   | 3.3   | 2.3   | 2.5   | 1.9   |
| Pold2   | 6.4  | 8.9   | 9.6   | 7.1  | 6.2  | 8.2  | 10.1  | 10.7  | 8.9   | 5.9   | 7.9   | 6.4   |
| Pold3   | 2.6  | 2.8   | 3.2   | 3.3  | 3.1  | 2.7  | 2.9   | 3.1   | 2.6   | 2.4   | 2.6   | 2.8   |
| Pold4   | 40.2 | 32.8  | 30.8  | 35.0 | 31.6 | 40.5 | 39.9  | 34.5  | 40.3  | 39.5  | 40.6  | 42.5  |
| Poldip2 | 30.0 | 31.7  | 33.1  | 29.9 | 27.4 | 24.9 | 32.2  | 35.6  | 33.2  | 27.7  | 28.9  | 31.8  |
| Poldip3 | 20.9 | 24.5  | 22.1  | 20.9 | 22.9 | 21.1 | 23.8  | 26.9  | 25.0  | 23.6  | 23.8  | 23.8  |
| Pole    | 1.2  | 1.6   | 2.5   | 0.9  | 2.3  | 0.7  | 3.0   | 1.6   | 2.0   | 0.9   | 1.7   | 1.2   |

Online Table 1

|          |       |       |       |       |       |       |       |      |       |       |       |       |
|----------|-------|-------|-------|-------|-------|-------|-------|------|-------|-------|-------|-------|
| Pole2    | 0.9   | 1.8   | 2.9   | 0.5   | 1.9   | 0.5   | 2.1   | 1.8  | 2.4   | 1.7   | 1.9   | 1.6   |
| Pole3    | 46.2  | 42.8  | 51.3  | 60.5  | 34.6  | 39.5  | 48.2  | 41.2 | 29.3  | 37.2  | 53.5  | 47.7  |
| Pole4    | 17.8  | 19.3  | 15.0  | 20.9  | 20.7  | 19.3  | 16.9  | 14.3 | 18.0  | 15.2  | 17.4  | 12.4  |
| Polg     | 9.4   | 10.0  | 9.5   | 8.8   | 9.6   | 7.9   | 10.9  | 10.1 | 11.2  | 10.2  | 9.3   | 9.4   |
| Polg2    | 1.5   | 1.2   | 1.5   | 1.1   | 1.5   | 1.5   | 1.1   | 1.1  | 1.4   | 1.7   | 1.3   | 1.3   |
| Polh     | 9.0   | 9.4   | 10.8  | 6.9   | 10.6  | 8.5   | 11.7  | 8.8  | 9.7   | 8.5   | 9.9   | 8.2   |
| Poli     | 3.3   | 2.9   | 2.9   | 3.5   | 2.3   | 3.4   | 2.7   | 2.2  | 1.9   | 2.4   | 2.7   | 2.3   |
| Polk     | 14.6  | 13.8  | 12.5  | 14.7  | 12.4  | 13.2  | 12.1  | 8.4  | 11.2  | 13.2  | 14.8  | 13.1  |
| Poll     | 3.4   | 4.1   | 3.5   | 4.2   | 4.0   | 4.2   | 3.3   | 3.6  | 3.9   | 3.6   | 3.3   | 3.1   |
| Polm     | 1.3   | 1.5   | 1.5   | 1.0   | 1.3   | 1.3   | 1.4   | 1.3  | 1.2   | 1.6   | 1.1   | 1.4   |
| Poln     | 0.1   | 0.3   | 0.2   | 0.2   | 0.1   | 0.4   | 0.2   | 0.3  | 0.1   | 0.2   | 0.2   | 0.2   |
| Polq     | 0.3   | 0.4   | 0.7   | 0.2   | 0.6   | 0.1   | 0.9   | 0.4  | 0.7   | 0.4   | 0.6   | 0.3   |
| Polr1a   | 7.8   | 6.4   | 5.7   | 9.0   | 7.4   | 7.3   | 7.6   | 6.8  | 5.4   | 7.0   | 7.0   | 6.9   |
| Polr1b   | 2.8   | 2.2   | 2.0   | 2.5   | 3.0   | 2.3   | 2.7   | 2.6  | 2.4   | 3.3   | 2.7   | 2.6   |
| Polr1c   | 18.8  | 16.6  | 15.6  | 15.0  | 16.4  | 16.0  | 15.0  | 16.1 | 14.8  | 19.1  | 15.4  | 16.2  |
| Polr1d   | 97.9  | 77.3  | 73.8  | 90.1  | 77.4  | 90.9  | 73.5  | 69.6 | 72.1  | 95.5  | 90.1  | 85.8  |
| Polr1e   | 3.8   | 3.4   | 3.3   | 3.8   | 3.3   | 3.1   | 3.0   | 3.1  | 2.6   | 3.2   | 3.1   | 2.3   |
| Polr2a   | 2.5   | 3.0   | 3.2   | 2.1   | 2.9   | 2.3   | 4.0   | 3.1  | 3.1   | 3.3   | 2.6   | 3.1   |
| Polr2b   | 20.1  | 19.1  | 20.2  | 18.3  | 17.7  | 20.7  | 16.9  | 21.3 | 17.4  | 19.0  | 19.7  | 20.9  |
| Polr2c   | 24.6  | 23.1  | 21.3  | 23.4  | 22.6  | 23.8  | 23.6  | 20.5 | 20.1  | 22.4  | 22.6  | 22.5  |
| Polr2d   | 15.2  | 15.6  | 16.3  | 14.8  | 16.7  | 14.4  | 19.1  | 19.1 | 18.1  | 16.9  | 17.9  | 16.4  |
| Polr2e   | 30.5  | 28.1  | 25.6  | 30.9  | 25.4  | 33.2  | 26.8  | 22.1 | 20.6  | 25.8  | 25.2  | 26.0  |
| Polr2f   | 42.2  | 40.8  | 42.9  | 51.4  | 43.8  | 44.5  | 43.2  | 40.6 | 39.5  | 37.2  | 45.7  | 42.2  |
| Polr2g   | 54.1  | 40.4  | 29.7  | 46.9  | 41.9  | 49.8  | 35.3  | 35.9 | 33.3  | 50.2  | 37.9  | 38.2  |
| Polr2h   | 16.8  | 13.2  | 13.2  | 13.0  | 13.1  | 15.9  | 13.8  | 12.6 | 14.6  | 17.0  | 14.3  | 14.2  |
| Polr2i   | 12.3  | 11.6  | 12.4  | 13.6  | 9.8   | 14.9  | 14.1  | 15.3 | 12.6  | 12.6  | 11.6  | 13.1  |
| Polr2j   | 38.5  | 41.4  | 40.6  | 44.1  | 40.3  | 44.5  | 48.3  | 46.7 | 39.7  | 42.0  | 42.6  | 48.2  |
| Polr2k   | 42.8  | 37.9  | 33.2  | 42.8  | 32.7  | 48.8  | 29.7  | 29.3 | 33.1  | 38.4  | 45.9  | 43.3  |
| Polr2l   | 56.8  | 62.2  | 48.3  | 51.6  | 55.1  | 60.3  | 54.2  | 52.0 | 55.2  | 60.6  | 53.9  | 52.0  |
| Polr2m   | 60.9  | 54.6  | 56.0  | 74.3  | 50.9  | 63.6  | 57.8  | 57.6 | 49.6  | 55.4  | 67.8  | 58.8  |
| Polr3a   | 5.7   | 4.9   | 4.9   | 6.1   | 5.8   | 5.6   | 5.5   | 4.9  | 4.9   | 5.1   | 5.3   | 4.9   |
| Polr3b   | 4.2   | 2.9   | 3.2   | 4.3   | 3.8   | 3.8   | 4.1   | 4.3  | 3.3   | 4.0   | 4.3   | 4.2   |
| Polr3c   | 9.2   | 10.2  | 10.5  | 10.8  | 9.5   | 9.5   | 10.9  | 11.3 | 9.5   | 8.5   | 11.1  | 9.0   |
| Polr3d   | 14.6  | 14.2  | 14.2  | 14.8  | 14.0  | 12.7  | 17.6  | 15.4 | 15.0  | 14.2  | 17.9  | 17.4  |
| Polr3e   | 5.2   | 4.6   | 3.8   | 5.8   | 5.4   | 5.5   | 5.5   | 4.7  | 4.7   | 4.8   | 5.5   | 5.0   |
| Polr3f   | 5.1   | 6.0   | 6.7   | 5.7   | 5.1   | 5.3   | 5.2   | 5.7  | 5.3   | 5.1   | 5.1   | 5.5   |
| Polr3g   | 2.2   | 2.3   | 2.6   | 1.8   | 1.5   | 2.9   | 1.7   | 2.3  | 1.7   | 1.9   | 1.9   | 1.7   |
| Polr3gl  | 8.2   | 9.2   | 12.8  | 8.3   | 6.2   | 8.8   | 6.7   | 8.3  | 6.7   | 6.5   | 8.7   | 10.1  |
| Polr3h   | 7.1   | 6.1   | 4.5   | 7.1   | 5.2   | 7.2   | 6.6   | 5.5  | 5.4   | 6.6   | 6.3   | 5.5   |
| Polr3k   | 7.6   | 8.1   | 7.1   | 9.7   | 8.6   | 8.8   | 7.0   | 8.2  | 7.9   | 9.7   | 8.8   | 8.4   |
| Polrmt   | 3.9   | 3.6   | 3.4   | 3.6   | 3.3   | 3.8   | 3.9   | 3.7  | 3.8   | 3.6   | 3.6   | 3.4   |
| Pom121   | 0.7   | 1.2   | 1.2   | 0.9   | 1.4   | 1.2   | 1.4   | 1.2  | 1.1   | 1.1   | 0.8   | 0.8   |
| Pom121I2 | 0.0   | 0.0   | 0.1   | 0.1   | 0.0   | 0.0   | 0.0   | 0.0  | 0.1   | 0.1   | 0.0   | 0.1   |
| Pomc     | 0.9   | 0.6   | 0.6   | 0.2   | 0.8   | 0.5   | 0.7   | 0.4  | 0.8   | 0.4   | 0.3   | 0.5   |
| Pomgnt1  | 27.1  | 24.6  | 21.4  | 27.1  | 22.9  | 26.2  | 25.9  | 20.3 | 26.4  | 26.0  | 24.3  | 22.8  |
| Pomp     | 139.1 | 111.0 | 104.0 | 145.5 | 121.2 | 139.5 | 111.7 | 93.9 | 100.6 | 126.8 | 117.3 | 118.8 |
| Pomt1    | 5.8   | 5.9   | 6.5   | 5.8   | 5.4   | 6.8   | 7.3   | 6.8  | 7.0   | 6.2   | 6.9   | 6.2   |
| Pomt2    | 4.1   | 3.6   | 3.2   | 3.1   | 3.5   | 3.6   | 3.8   | 4.3  | 3.5   | 3.9   | 3.3   | 3.2   |
| Pon1     | 0.0   | 0.0   | 0.0   | 0.0   | 0.0   | 0.1   | 0.0   | 0.0  | 0.0   | 0.0   | 0.0   | 0.1   |
| Pon2     | 67.8  | 54.9  | 53.8  | 97.0  | 66.1  | 92.4  | 64.5  | 46.9 | 51.3  | 57.9  | 62.0  | 68.2  |
| Pon3     | 29.3  | 26.4  | 29.9  | 28.7  | 31.0  | 27.9  | 22.6  | 25.4 | 21.6  | 22.1  | 22.8  | 28.9  |
| Pop1     | 4.5   | 5.3   | 4.3   | 4.4   | 4.7   | 5.1   | 4.2   | 3.4  | 3.7   | 4.7   | 4.4   | 4.2   |
| Pop4     | 34.5  | 27.6  | 25.6  | 32.1  | 30.9  | 24.4  | 32.5  | 22.2 | 26.5  | 26.2  | 34.5  | 27.4  |
| Pop5     | 8.2   | 8.1   | 7.2   | 9.7   | 8.5   | 5.6   | 7.1   | 5.6  | 8.8   | 10.3  | 8.1   | 8.1   |
| Pop7     | 9.0   | 9.1   | 6.3   | 10.7  | 9.6   | 8.5   | 10.2  | 10.6 | 9.4   | 10.2  | 7.8   | 9.5   |
| Popdc2   | 2.2   | 1.0   | 0.6   | 2.4   | 1.2   | 1.2   | 1.3   | 0.3  | 1.3   | 1.5   | 1.8   | 1.0   |
| Popdc3   | 0.4   | 0.1   | 0.0   | 0.2   | 0.0   | 0.3   | 0.0   | 0.0  | 0.0   | 0.0   | 0.0   | 0.0   |

Online Table 1

|          |        |       |       |        |       |        |       |       |       |       |        |       |
|----------|--------|-------|-------|--------|-------|--------|-------|-------|-------|-------|--------|-------|
| Por      | 13.6   | 14.6  | 14.5  | 18.9   | 19.8  | 16.8   | 20.7  | 16.3  | 16.9  | 16.8  | 15.5   | 16.0  |
| Porcn    | 1.3    | 1.0   | 1.3   | 1.6    | 1.1   | 1.7    | 1.5   | 1.3   | 1.6   | 1.2   | 1.3    | 1.7   |
| Postn    | 172.2  | 214.7 | 415.7 | 186.5  | 375.7 | 246.2  | 157.8 | 422.7 | 308.4 | 256.1 | 293.9  | 344.5 |
| Pot1a    | 3.7    | 4.6   | 4.4   | 2.8    | 3.7   | 3.1    | 3.4   | 3.7   | 4.2   | 3.9   | 4.0    | 3.8   |
| Pot1b    | 0.9    | 1.2   | 1.1   | 0.6    | 0.9   | 0.8    | 0.8   | 0.8   | 0.9   | 1.0   | 0.7    | 0.8   |
| Pou2f1   | 0.8    | 0.8   | 0.9   | 0.7    | 0.8   | 0.9    | 0.8   | 0.7   | 0.7   | 0.7   | 0.9    | 0.7   |
| Pou2f2   | 0.1    | 0.0   | 0.0   | 0.8    | 1.9   | 0.0    | 0.3   | 0.0   | 0.1   | 0.1   | 0.1    | 0.1   |
| Pou2f3   | 0.1    | 0.1   | 0.1   | 0.2    | 0.1   | 0.4    | 0.1   | 0.1   | 0.1   | 0.0   | 0.0    | 0.1   |
| Pou3f1   | 0.1    | 0.0   | 0.1   | 0.0    | 0.0   | 0.0    | 0.0   | 0.0   | 0.0   | 0.1   | 0.0    | 0.1   |
| Pou3f3   | 0.0    | 0.1   | 0.0   | 0.0    | 0.0   | 0.1    | 0.0   | 0.0   | 0.0   | 0.0   | 0.0    | 0.0   |
| Pou3f4   | 0.0    | 0.0   | 0.0   | 0.0    | 0.0   | 0.0    | 0.0   | 0.0   | 0.0   | 0.0   | 0.1    | 0.0   |
| Pou4f1   | 0.0    | 0.1   | 0.0   | 0.0    | 0.0   | 0.0    | 0.0   | 0.0   | 0.0   | 0.0   | 0.0    | 0.0   |
| Pou5f1   | 0.0    | 0.0   | 0.1   | 0.0    | 0.1   | 0.0    | 0.1   | 0.0   | 0.0   | 0.0   | 0.0    | 0.0   |
| Pou5f2   | 0.0    | 0.1   | 0.0   | 0.0    | 0.1   | 0.0    | 0.0   | 0.1   | 0.0   | 0.1   | 0.0    | 0.1   |
| Pou6f1   | 3.3    | 3.1   | 3.1   | 3.3    | 2.5   | 3.4    | 3.1   | 2.6   | 2.6   | 2.4   | 2.4    | 2.3   |
| Pp2d1    | 0.3    | 0.8   | 2.1   | 1.9    | 1.0   | 1.6    | 1.4   | 1.7   | 1.4   | 1.8   | 1.9    | 2.4   |
| Ppa1     | 38.7   | 32.7  | 29.4  | 41.2   | 33.9  | 34.1   | 32.2  | 30.9  | 30.0  | 34.0  | 36.8   | 29.3  |
| Ppa2     | 15.5   | 12.9  | 13.8  | 15.6   | 12.4  | 13.7   | 10.8  | 13.4  | 13.2  | 16.5  | 15.9   | 13.0  |
| Ppan     | 9.2    | 8.2   | 7.1   | 10.8   | 10.0  | 8.7    | 10.2  | 8.8   | 8.8   | 9.1   | 10.1   | 7.6   |
| Ppap2a   | 60.4   | 68.2  | 86.2  | 59.0   | 64.9  | 54.9   | 67.7  | 96.8  | 90.6  | 82.5  | 81.5   | 72.0  |
| Ppap2b   | 32.0   | 59.5  | 84.2  | 25.1   | 51.0  | 28.8   | 59.3  | 56.1  | 53.9  | 40.6  | 37.3   | 51.2  |
| Ppap2c   | 18.3   | 11.4  | 9.0   | 19.9   | 14.3  | 21.7   | 11.3  | 12.6  | 11.3  | 12.2  | 9.8    | 10.8  |
| Ppapdc1b | 18.1   | 14.2  | 17.5  | 19.9   | 18.2  | 18.0   | 20.5  | 22.9  | 21.4  | 16.8  | 21.4   | 18.8  |
| Ppapdc2  | 1.6    | 1.9   | 1.4   | 1.4    | 1.7   | 1.9    | 1.6   | 2.0   | 2.0   | 1.8   | 2.0    | 2.5   |
| Ppapdc3  | 3.4    | 2.7   | 2.8   | 3.0    | 2.7   | 3.5    | 3.0   | 2.6   | 3.3   | 3.1   | 2.6    | 2.8   |
| Ppara    | 0.3    | 0.6   | 0.6   | 0.3    | 0.3   | 0.3    | 0.3   | 0.4   | 0.4   | 0.3   | 0.2    | 0.4   |
| Ppard    | 2.7    | 3.2   | 2.6   | 2.5    | 2.7   | 2.5    | 2.8   | 3.1   | 2.3   | 2.8   | 2.6    | 2.6   |
| Pparg    | 1.7    | 1.3   | 0.8   | 3.6    | 2.0   | 3.8    | 1.5   | 0.5   | 1.6   | 0.9   | 1.0    | 1.2   |
| Ppargc1a | 0.0    | 0.0   | 0.0   | 0.0    | 0.0   | 0.0    | 0.0   | 0.0   | 0.0   | 0.0   | 0.0    | 0.0   |
| Ppargc1b | 0.0    | 0.0   | 0.0   | 0.1    | 0.0   | 0.0    | 0.1   | 0.0   | 0.0   | 0.0   | 0.0    | 0.0   |
| Ppat     | 2.5    | 2.9   | 3.0   | 2.5    | 2.4   | 2.2    | 2.6   | 2.8   | 2.3   | 2.7   | 2.9    | 2.5   |
| Ppcdc    | 4.4    | 3.7   | 3.5   | 5.0    | 4.4   | 5.0    | 4.0   | 3.9   | 3.9   | 4.2   | 4.4    | 3.7   |
| Ppcs     | 6.6    | 6.1   | 5.2   | 6.2    | 4.9   | 6.3    | 5.1   | 4.8   | 5.2   | 5.8   | 4.9    | 5.7   |
| Ppdpf    | 14.4   | 14.6  | 17.5  | 19.8   | 12.0  | 22.0   | 15.8  | 18.8  | 15.0  | 15.6  | 16.3   | 14.1  |
| Ppef1    | 1.7    | 0.5   | 0.3   | 2.3    | 1.2   | 0.7    | 0.7   | 0.6   | 0.4   | 0.4   | 0.4    | 0.3   |
| Ppef2    | 0.0    | 0.0   | 0.0   | 0.1    | 0.0   | 0.1    | 0.0   | 0.0   | 0.0   | 0.0   | 0.0    | 0.0   |
| Ppfia1   | 16.7   | 16.4  | 17.0  | 18.5   | 16.8  | 18.1   | 19.0  | 16.0  | 17.6  | 17.4  | 19.1   | 20.1  |
| Ppfia2   | 0.0    | 0.0   | 0.0   | 0.0    | 0.0   | 0.0    | 0.0   | 0.0   | 0.0   | 0.0   | 0.0    | 0.0   |
| Ppfia3   | 0.2    | 0.1   | 0.1   | 0.1    | 0.2   | 0.1    | 0.2   | 0.1   | 0.2   | 0.1   | 0.1    | 0.1   |
| Ppfia4   | 0.1    | 0.0   | 0.0   | 0.2    | 0.5   | 0.0    | 0.1   | 0.0   | 0.0   | 0.0   | 0.1    | 0.0   |
| Ppflbp1  | 185.3  | 188.0 | 202.3 | 211.4  | 161.2 | 211.6  | 228.9 | 187.5 | 195.4 | 212.4 | 246.9  | 261.2 |
| Ppflbp2  | 2.5    | 1.8   | 1.8   | 5.3    | 9.0   | 1.8    | 2.2   | 1.7   | 1.2   | 1.9   | 1.5    | 2.3   |
| Pphln1   | 6.8    | 7.5   | 7.8   | 7.8    | 7.3   | 6.9    | 6.9   | 7.4   | 6.4   | 6.9   | 7.3    | 7.9   |
| Ppia     | 1117.3 | 886.9 | 761.5 | 1181.8 | 978.2 | 1160.5 | 991.2 | 990.9 | 916.2 | 863.4 | 1033.5 | 841.8 |
| Ppib     | 213.8  | 182.2 | 188.5 | 213.0  | 182.3 | 181.4  | 197.0 | 187.5 | 175.8 | 203.3 | 188.0  | 218.1 |
| Ppic     | 94.6   | 61.3  | 80.9  | 102.4  | 91.4  | 75.7   | 79.5  | 88.7  | 78.1  | 88.0  | 78.1   | 85.5  |
| Ppid     | 45.5   | 41.5  | 39.2  | 51.5   | 35.4  | 46.6   | 36.5  | 27.6  | 26.8  | 41.8  | 44.7   | 41.6  |
| Ppie     | 13.1   | 10.5  | 9.1   | 13.1   | 9.5   | 11.0   | 8.9   | 11.0  | 11.1  | 11.4  | 10.0   | 10.3  |
| Ppif     | 2.5    | 3.1   | 2.1   | 1.6    | 2.2   | 2.0    | 2.2   | 2.7   | 2.2   | 3.0   | 2.7    | 1.8   |
| Ppifos   | 0.3    | 0.2   | 0.5   | 0.0    | 0.2   | 0.4    | 0.3   | 0.2   | 0.2   | 0.2   | 0.1    | 0.1   |
| Ppig     | 9.9    | 8.8   | 11.7  | 13.5   | 8.5   | 10.6   | 10.5  | 9.6   | 6.6   | 8.5   | 12.0   | 12.8  |
| Ppih     | 6.0    | 7.8   | 9.1   | 4.9    | 7.9   | 6.5    | 7.2   | 8.9   | 8.0   | 7.5   | 8.0    | 7.3   |
| Ppil1    | 7.8    | 9.9   | 10.4  | 10.4   | 10.6  | 9.7    | 11.0  | 11.7  | 10.7  | 11.2  | 11.6   | 10.9  |
| Ppil2    | 28.4   | 29.2  | 30.2  | 30.9   | 28.9  | 31.3   | 29.2  | 31.6  | 26.4  | 31.1  | 35.9   | 33.3  |
| Ppil3    | 33.2   | 26.6  | 24.6  | 28.2   | 25.1  | 30.2   | 25.3  | 24.7  | 24.6  | 26.9  | 28.2   | 28.2  |
| Ppil4    | 10.3   | 10.8  | 13.2  | 11.1   | 10.0  | 10.1   | 11.5  | 11.4  | 10.0  | 11.0  | 12.8   | 14.0  |
| Ppil6    | 0.3    | 0.2   | 0.2   | 0.3    | 0.1   | 0.2    | 0.0   | 0.0   | 0.1   | 0.1   | 0.0    | 0.0   |

Online Table 1

|            |      |      |      |      |      |      |      |       |      |      |       |      |
|------------|------|------|------|------|------|------|------|-------|------|------|-------|------|
| Ppip5k1    | 4.9  | 4.7  | 3.6  | 4.5  | 3.6  | 5.8  | 2.9  | 3.1   | 2.6  | 4.4  | 4.0   | 4.0  |
| Ppip5k2    | 4.3  | 4.3  | 4.3  | 4.9  | 4.8  | 3.9  | 3.8  | 4.8   | 4.9  | 4.8  | 4.9   | 5.0  |
| Ppl        | 4.7  | 3.3  | 3.4  | 0.8  | 1.1  | 0.7  | 2.8  | 5.4   | 2.6  | 3.4  | 5.9   | 5.2  |
| Ppm1a      | 46.4 | 42.4 | 38.5 | 47.7 | 34.8 | 48.9 | 44.1 | 35.2  | 36.0 | 35.0 | 40.6  | 41.1 |
| Ppm1b      | 25.7 | 24.8 | 24.0 | 27.7 | 23.1 | 26.3 | 26.2 | 19.0  | 22.2 | 22.4 | 25.7  | 24.0 |
| Ppm1d      | 3.5  | 3.9  | 6.4  | 2.9  | 4.1  | 3.2  | 4.3  | 4.5   | 4.1  | 5.2  | 4.4   | 5.6  |
| Ppm1e      | 0.0  | 0.0  | 0.1  | 0.0  | 0.1  | 0.0  | 0.0  | 0.1   | 0.1  | 0.1  | 0.1   | 0.1  |
| Ppm1f      | 21.9 | 22.1 | 17.2 | 20.2 | 19.1 | 20.8 | 18.0 | 15.7  | 17.0 | 21.5 | 18.8  | 17.5 |
| Ppm1g      | 26.3 | 23.4 | 27.6 | 28.1 | 26.6 | 24.7 | 33.9 | 26.7  | 23.7 | 23.9 | 28.3  | 31.2 |
| Ppm1h      | 4.4  | 4.0  | 3.2  | 5.5  | 5.1  | 4.9  | 3.0  | 2.6   | 2.6  | 2.9  | 2.9   | 3.0  |
| Ppm1j      | 0.5  | 0.3  | 0.4  | 0.3  | 0.4  | 0.7  | 0.2  | 0.4   | 0.3  | 0.3  | 0.2   | 0.4  |
| Ppm1k      | 4.6  | 5.7  | 5.8  | 4.2  | 4.2  | 4.9  | 4.5  | 3.0   | 3.9  | 4.6  | 4.8   | 4.3  |
| Ppm1l      | 0.3  | 0.4  | 0.3  | 0.4  | 0.2  | 0.3  | 0.3  | 0.5   | 0.4  | 1.1  | 0.6   | 0.2  |
| Ppm1m      | 12.5 | 15.4 | 15.2 | 13.4 | 13.5 | 14.7 | 12.5 | 12.7  | 14.1 | 13.2 | 14.2  | 14.1 |
| Ppme1      | 21.1 | 19.5 | 16.7 | 22.2 | 17.7 | 19.8 | 23.2 | 17.4  | 17.7 | 20.5 | 22.0  | 20.8 |
| Ppox       | 7.3  | 9.0  | 6.6  | 6.3  | 6.9  | 7.1  | 6.6  | 7.3   | 8.4  | 7.0  | 6.2   | 5.4  |
| Ppp1ca     | 95.3 | 90.7 | 93.9 | 87.9 | 94.6 | 83.5 | 89.4 | 107.0 | 99.5 | 98.7 | 101.4 | 92.8 |
| Ppp1cb     | 36.6 | 39.3 | 45.1 | 46.5 | 39.4 | 45.1 | 36.1 | 36.7  | 37.8 | 39.1 | 44.5  | 47.0 |
| Ppp1cc     | 58.3 | 71.0 | 68.5 | 52.3 | 65.2 | 54.0 | 65.8 | 83.3  | 81.2 | 79.8 | 77.6  | 75.7 |
| Ppp1r10    | 5.4  | 5.7  | 5.9  | 6.2  | 6.2  | 5.0  | 6.9  | 6.1   | 5.8  | 6.4  | 7.0   | 6.2  |
| Ppp1r11    | 25.4 | 17.3 | 17.8 | 31.2 | 18.6 | 26.8 | 22.1 | 16.9  | 16.0 | 20.8 | 22.5  | 20.3 |
| Ppp1r12a   | 28.1 | 26.0 | 29.7 | 30.2 | 22.7 | 25.3 | 29.1 | 26.4  | 25.9 | 30.3 | 36.7  | 35.1 |
| Ppp1r12b   | 3.6  | 3.1  | 2.7  | 3.2  | 2.1  | 2.7  | 2.6  | 2.0   | 2.8  | 3.0  | 3.2   | 3.3  |
| Ppp1r12c   | 24.2 | 21.7 | 19.2 | 27.0 | 23.7 | 25.7 | 22.1 | 16.6  | 21.0 | 21.6 | 21.0  | 20.4 |
| Ppp1r13b   | 2.3  | 3.1  | 2.9  | 2.3  | 3.0  | 2.3  | 2.5  | 2.3   | 2.7  | 2.8  | 2.6   | 2.5  |
| Ppp1r13l   | 0.5  | 0.5  | 0.3  | 0.4  | 0.6  | 0.5  | 1.0  | 0.5   | 0.6  | 0.9  | 0.6   | 0.5  |
| Ppp1r14a   | 20.8 | 14.5 | 10.5 | 24.1 | 10.1 | 23.2 | 12.8 | 8.7   | 10.6 | 4.5  | 6.5   | 4.4  |
| Ppp1r14b   | 74.9 | 64.0 | 55.3 | 71.8 | 72.3 | 66.1 | 67.6 | 93.6  | 72.3 | 82.6 | 76.2  | 65.6 |
| Ppp1r14c   | 0.0  | 0.0  | 0.0  | 0.0  | 0.0  | 0.0  | 0.0  | 0.0   | 0.0  | 0.0  | 0.0   | 0.0  |
| Ppp1r15a   | 18.4 | 13.8 | 12.0 | 23.9 | 11.5 | 19.3 | 16.0 | 11.6  | 12.6 | 18.3 | 15.2  | 15.2 |
| Ppp1r15b   | 10.0 | 9.7  | 9.8  | 7.5  | 9.8  | 9.1  | 10.3 | 10.8  | 10.7 | 9.5  | 9.9   | 8.7  |
| Ppp1r16a   | 6.1  | 5.9  | 5.4  | 6.7  | 6.0  | 7.9  | 6.0  | 6.2   | 6.5  | 5.5  | 5.6   | 5.5  |
| Ppp1r16b   | 0.3  | 0.2  | 0.2  | 0.1  | 0.1  | 0.1  | 0.2  | 0.3   | 0.3  | 0.0  | 0.1   | 0.0  |
| Ppp1r18    | 14.3 | 14.5 | 13.1 | 19.8 | 19.0 | 14.5 | 17.4 | 14.7  | 15.6 | 15.4 | 14.6  | 15.1 |
| Ppp1r1a    | 0.1  | 0.0  | 0.0  | 0.0  | 0.1  | 0.0  | 0.1  | 0.0   | 0.1  | 0.1  | 0.0   | 0.0  |
| Ppp1r1b    | 0.1  | 0.0  | 0.0  | 0.0  | 0.0  | 0.0  | 0.0  | 0.0   | 0.1  | 0.0  | 0.0   | 0.1  |
| Ppp1r1c    | 0.0  | 0.0  | 0.0  | 0.0  | 0.0  | 0.0  | 0.0  | 0.0   | 0.0  | 0.0  | 0.0   | 0.0  |
| Ppp1r2     | 33.6 | 31.6 | 35.1 | 36.7 | 26.8 | 32.8 | 26.3 | 26.8  | 26.1 | 24.3 | 31.8  | 27.5 |
| Ppp1r21    | 7.1  | 8.1  | 7.7  | 7.4  | 8.9  | 7.3  | 7.7  | 6.8   | 6.9  | 7.9  | 7.8   | 8.1  |
| Ppp1r26    | 1.0  | 1.3  | 1.1  | 1.1  | 0.6  | 1.3  | 0.8  | 0.8   | 0.6  | 0.9  | 0.8   | 0.8  |
| Ppp1r27    | 0.2  | 0.2  | 0.0  | 0.5  | 0.2  | 0.2  | 0.0  | 0.1   | 0.1  | 0.2  | 0.1   | 0.2  |
| Ppp1r2-ps3 | 0.3  | 0.4  | 0.6  | 0.1  | 0.2  | 0.3  | 0.3  | 0.4   | 0.3  | 0.1  | 0.2   | 0.3  |
| Ppp1r32    | 0.0  | 0.1  | 0.0  | 0.0  | 0.0  | 0.1  | 0.0  | 0.0   | 0.0  | 0.1  | 0.0   | 0.0  |
| Ppp1r35    | 6.3  | 7.1  | 4.3  | 5.8  | 5.4  | 5.3  | 5.2  | 6.2   | 6.5  | 7.3  | 6.0   | 5.8  |
| Ppp1r36    | 0.4  | 0.4  | 0.4  | 0.1  | 0.3  | 0.4  | 0.3  | 0.2   | 0.5  | 0.1  | 0.4   | 0.4  |
| Ppp1r37    | 15.4 | 16.7 | 14.5 | 15.4 | 13.7 | 15.4 | 14.8 | 14.9  | 15.4 | 14.1 | 13.3  | 14.6 |
| Ppp1r3a    | 0.0  | 0.0  | 0.0  | 0.0  | 0.0  | 0.0  | 0.0  | 0.0   | 0.0  | 0.0  | 0.0   | 0.0  |
| Ppp1r3b    | 2.4  | 3.0  | 3.0  | 2.2  | 2.8  | 2.9  | 2.8  | 2.3   | 2.9  | 2.2  | 2.5   | 2.4  |
| Ppp1r3c    | 0.7  | 1.3  | 2.7  | 0.6  | 0.6  | 1.3  | 0.6  | 1.2   | 0.9  | 1.2  | 0.6   | 1.1  |
| Ppp1r3d    | 0.6  | 0.5  | 0.2  | 1.1  | 0.5  | 0.7  | 0.4  | 0.4   | 0.4  | 1.7  | 0.9   | 0.6  |
| Ppp1r3e    | 0.2  | 0.1  | 0.2  | 0.2  | 0.3  | 0.2  | 0.2  | 0.4   | 0.4  | 0.5  | 0.1   | 0.3  |
| Ppp1r3f    | 0.5  | 0.6  | 0.6  | 0.7  | 0.4  | 0.4  | 0.5  | 0.5   | 0.5  | 0.8  | 0.6   | 0.6  |
| Ppp1r7     | 9.9  | 9.0  | 9.3  | 10.6 | 8.5  | 8.9  | 8.3  | 10.2  | 9.1  | 7.9  | 9.2   | 9.2  |
| Ppp1r8     | 14.4 | 12.4 | 13.5 | 14.2 | 12.1 | 14.7 | 13.3 | 12.9  | 12.5 | 14.2 | 14.6  | 13.9 |
| Ppp1r9a    | 1.5  | 1.6  | 1.6  | 1.1  | 0.7  | 1.8  | 0.9  | 0.8   | 0.7  | 1.1  | 0.9   | 1.0  |
| Ppp1r9b    | 21.0 | 22.6 | 23.5 | 25.0 | 21.8 | 22.7 | 22.6 | 20.2  | 19.5 | 19.0 | 20.3  | 20.4 |
| Ppp2ca     | 80.1 | 77.4 | 77.5 | 75.7 | 77.5 | 76.7 | 75.6 | 84.6  | 76.4 | 81.9 | 86.5  | 83.4 |

Online Table 1

|           |      |      |      |      |      |      |      |      |      |      |      |      |
|-----------|------|------|------|------|------|------|------|------|------|------|------|------|
| Ppp2cb    | 40.7 | 39.0 | 29.6 | 38.5 | 34.6 | 38.1 | 35.6 | 32.9 | 38.4 | 37.5 | 39.6 | 37.3 |
| Ppp2r1a   | 62.7 | 55.1 | 47.8 | 58.7 | 59.1 | 56.8 | 60.1 | 58.5 | 59.9 | 60.7 | 61.0 | 51.9 |
| Ppp2r1b   | 9.2  | 11.2 | 10.3 | 9.5  | 10.7 | 9.9  | 8.6  | 9.1  | 8.5  | 9.2  | 9.0  | 9.3  |
| Ppp2r2a   | 3.7  | 4.7  | 4.9  | 4.7  | 4.4  | 3.6  | 5.5  | 4.7  | 4.7  | 4.9  | 5.0  | 5.2  |
| Ppp2r2b   | 0.2  | 0.1  | 0.0  | 0.1  | 0.0  | 0.0  | 0.0  | 0.1  | 0.2  | 2.6  | 0.7  | 0.4  |
| Ppp2r2c   | 1.6  | 0.8  | 0.6  | 1.3  | 0.9  | 1.4  | 0.4  | 0.1  | 0.1  | 0.2  | 0.3  | 0.3  |
| Ppp2r2d   | 14.1 | 13.0 | 13.8 | 13.4 | 12.5 | 13.3 | 14.0 | 13.2 | 13.1 | 11.1 | 14.4 | 14.7 |
| Ppp2r3a   | 3.8  | 4.6  | 5.1  | 3.2  | 3.6  | 4.0  | 4.5  | 5.0  | 4.4  | 3.1  | 4.0  | 4.5  |
| Ppp2r3c   | 13.5 | 12.0 | 10.6 | 14.3 | 11.9 | 12.9 | 10.2 | 10.2 | 9.7  | 11.2 | 12.1 | 12.3 |
| Ppp2r3d   | 0.7  | 0.8  | 0.6  | 0.5  | 1.0  | 0.5  | 0.8  | 0.9  | 0.9  | 0.9  | 0.7  | 0.8  |
| Ppp2r4    | 23.6 | 22.5 | 21.4 | 25.0 | 26.9 | 26.4 | 26.8 | 23.7 | 25.7 | 24.7 | 23.6 | 22.3 |
| Ppp2r5a   | 14.5 | 14.5 | 14.4 | 16.4 | 16.1 | 14.7 | 13.9 | 14.7 | 14.5 | 18.8 | 17.0 | 16.4 |
| Ppp2r5b   | 16.6 | 16.3 | 13.2 | 15.4 | 13.4 | 16.1 | 15.7 | 12.3 | 16.8 | 18.3 | 15.8 | 12.4 |
| Ppp2r5c   | 39.5 | 43.7 | 48.0 | 42.2 | 41.9 | 41.9 | 40.0 | 42.2 | 38.0 | 38.0 | 45.0 | 44.1 |
| Ppp2r5d   | 21.3 | 24.1 | 26.1 | 20.3 | 22.3 | 22.0 | 23.6 | 23.5 | 23.5 | 22.6 | 24.5 | 21.9 |
| Ppp2r5e   | 5.4  | 6.8  | 6.2  | 5.8  | 5.1  | 5.5  | 6.1  | 5.0  | 5.1  | 5.5  | 6.3  | 5.8  |
| Ppp3ca    | 26.0 | 22.0 | 26.4 | 25.2 | 25.6 | 24.6 | 25.3 | 28.0 | 22.8 | 30.5 | 27.8 | 30.3 |
| Ppp3cb    | 7.3  | 8.0  | 9.2  | 7.9  | 7.7  | 8.0  | 7.7  | 9.0  | 9.4  | 8.6  | 9.3  | 9.9  |
| Ppp3cc    | 7.8  | 8.9  | 8.6  | 6.4  | 6.2  | 5.6  | 7.8  | 7.9  | 7.7  | 8.6  | 8.8  | 10.3 |
| Ppp3r1    | 33.0 | 32.7 | 29.6 | 31.5 | 30.3 | 29.3 | 28.8 | 24.5 | 28.5 | 36.0 | 36.7 | 37.3 |
| Ppp4c     | 37.4 | 37.7 | 34.2 | 33.0 | 39.8 | 31.9 | 37.2 | 37.1 | 37.3 | 38.8 | 35.1 | 32.6 |
| Ppp4r1    | 17.3 | 16.9 | 14.0 | 19.6 | 19.9 | 16.9 | 21.4 | 21.3 | 23.1 | 17.6 | 20.0 | 17.0 |
| Ppp4r1-ps | 0.4  | 0.4  | 0.3  | 0.7  | 0.4  | 0.5  | 0.5  | 0.5  | 0.5  | 0.4  | 0.4  | 0.4  |
| Ppp4r2    | 26.0 | 27.6 | 29.5 | 25.5 | 24.9 | 25.5 | 24.5 | 25.8 | 24.2 | 27.1 | 30.2 | 31.2 |
| Ppp4r4    | 0.4  | 0.6  | 0.5  | 0.4  | 0.4  | 0.7  | 0.4  | 0.5  | 0.5  | 0.3  | 0.5  | 0.4  |
| Ppp5c     | 19.2 | 18.0 | 18.1 | 17.9 | 19.2 | 17.4 | 21.9 | 19.3 | 17.2 | 18.8 | 18.0 | 16.9 |
| Ppp6c     | 28.6 | 28.6 | 26.3 | 31.7 | 26.3 | 27.6 | 24.4 | 26.2 | 24.9 | 26.2 | 26.2 | 25.2 |
| Ppp6r1    | 18.2 | 17.7 | 18.7 | 20.5 | 21.0 | 17.2 | 19.1 | 18.9 | 18.8 | 17.7 | 17.2 | 16.9 |
| Ppp6r2    | 8.0  | 8.4  | 8.1  | 7.6  | 6.5  | 7.7  | 8.1  | 9.1  | 8.6  | 8.3  | 7.4  | 8.1  |
| Ppp6r3    | 15.9 | 18.7 | 20.5 | 15.5 | 18.0 | 15.5 | 17.8 | 20.6 | 19.9 | 17.8 | 20.5 | 20.1 |
| Pprc1     | 2.3  | 2.7  | 2.7  | 2.3  | 3.2  | 2.8  | 3.7  | 3.2  | 3.3  | 2.6  | 3.0  | 2.1  |
| Ppi1      | 61.7 | 46.5 | 41.7 | 74.2 | 55.0 | 69.4 | 37.3 | 35.8 | 37.6 | 45.6 | 43.7 | 52.1 |
| Ppi2      | 6.9  | 7.1  | 7.0  | 8.7  | 11.5 | 8.0  | 6.2  | 7.3  | 7.0  | 7.1  | 6.1  | 5.9  |
| Pptc7     | 4.6  | 5.0  | 4.4  | 5.6  | 5.0  | 5.1  | 5.3  | 4.7  | 5.2  | 5.4  | 5.2  | 5.7  |
| Ppwd1     | 2.9  | 3.7  | 3.3  | 2.6  | 3.0  | 3.1  | 2.8  | 3.2  | 3.0  | 2.9  | 3.0  | 2.5  |
| Ppyr1     | 0.1  | 0.0  | 0.0  | 0.0  | 0.1  | 0.0  | 0.2  | 0.1  | 0.0  | 0.1  | 0.1  | 0.1  |
| Pqbp1     | 34.7 | 36.6 | 45.0 | 47.1 | 31.1 | 36.8 | 45.1 | 40.4 | 30.1 | 33.8 | 51.3 | 48.3 |
| Pqlc1     | 4.7  | 5.2  | 4.0  | 6.0  | 8.2  | 5.5  | 6.0  | 4.3  | 5.8  | 6.1  | 5.0  | 4.3  |
| Pqlc2     | 2.7  | 2.3  | 2.4  | 3.9  | 3.5  | 2.8  | 3.2  | 2.6  | 2.9  | 2.6  | 2.2  | 1.9  |
| Pqlc3     | 32.1 | 27.2 | 34.7 | 33.4 | 28.3 | 40.2 | 24.9 | 34.3 | 22.2 | 29.1 | 27.9 | 32.9 |
| Pradc1    | 1.6  | 2.2  | 2.3  | 1.6  | 1.8  | 1.6  | 2.3  | 2.2  | 2.4  | 2.1  | 2.4  | 2.0  |
| Praf2     | 58.8 | 52.0 | 53.8 | 72.7 | 50.7 | 67.3 | 60.8 | 63.3 | 49.2 | 48.6 | 63.7 | 54.8 |
| Pram1     | 0.1  | 0.2  | 0.1  | 0.3  | 0.6  | 0.0  | 0.2  | 0.1  | 0.1  | 0.1  | 0.1  | 0.0  |
| Pramef12  | 0.2  | 0.1  | 0.0  | 0.1  | 0.1  | 0.1  | 0.2  | 0.1  | 0.2  | 0.1  | 0.1  | 0.3  |
| Pramef8   | 6.8  | 6.4  | 6.0  | 6.4  | 5.9  | 5.9  | 6.0  | 5.9  | 6.3  | 6.5  | 6.6  | 6.2  |
| Prc1      | 5.2  | 8.9  | 16.0 | 1.5  | 12.6 | 1.8  | 21.3 | 8.2  | 15.9 | 7.9  | 14.1 | 10.2 |
| Prcc      | 9.7  | 10.2 | 10.8 | 10.2 | 9.2  | 9.6  | 10.9 | 11.2 | 9.8  | 10.2 | 11.2 | 9.6  |
| Prcp      | 6.8  | 7.7  | 8.6  | 6.2  | 8.3  | 6.8  | 8.5  | 12.3 | 9.0  | 8.1  | 9.0  | 9.2  |
| Prdm1     | 0.0  | 0.0  | 0.0  | 0.1  | 0.0  | 0.0  | 0.1  | 0.0  | 0.0  | 0.0  | 0.0  | 0.0  |
| Prdm10    | 0.8  | 1.0  | 1.0  | 0.9  | 1.1  | 0.8  | 1.2  | 1.4  | 1.1  | 0.7  | 1.3  | 1.0  |
| Prdm11    | 0.4  | 0.7  | 0.4  | 0.4  | 0.4  | 0.5  | 0.4  | 0.5  | 0.5  | 0.3  | 0.1  | 0.4  |
| Prdm15    | 1.6  | 2.1  | 1.6  | 1.7  | 2.0  | 2.0  | 2.0  | 1.9  | 1.9  | 2.1  | 2.1  | 2.0  |
| Prdm16    | 0.4  | 0.4  | 0.5  | 0.5  | 0.4  | 0.5  | 0.4  | 0.4  | 0.4  | 0.5  | 0.3  | 0.4  |
| Prdm2     | 6.1  | 7.5  | 6.5  | 6.8  | 6.0  | 5.8  | 6.5  | 6.3  | 6.0  | 5.9  | 6.3  | 6.3  |
| Prdm4     | 8.4  | 8.4  | 8.4  | 7.7  | 8.0  | 7.3  | 8.4  | 8.9  | 8.1  | 7.3  | 8.7  | 7.4  |
| Prdm5     | 11.0 | 10.7 | 14.4 | 9.8  | 9.0  | 12.0 | 10.0 | 12.5 | 11.2 | 10.5 | 12.5 | 13.5 |
| Prdm6     | 0.2  | 0.3  | 0.2  | 0.1  | 0.1  | 0.2  | 0.1  | 0.1  | 0.0  | 0.1  | 0.0  | 0.0  |

Online Table 1



|          |       |       |       |        |        |       |       |       |       |       |       |       |
|----------|-------|-------|-------|--------|--------|-------|-------|-------|-------|-------|-------|-------|
| Prdm8    | 0.1   | 0.2   | 0.1   | 0.2    | 0.1    | 0.1   | 0.1   | 0.1   | 0.1   | 0.1   | 0.0   | 0.0   |
| Prdm9    | 0.3   | 0.4   | 0.6   | 0.5    | 0.3    | 0.6   | 0.4   | 0.4   | 0.3   | 0.4   | 0.4   | 0.4   |
| Prdx1    | 758.4 | 597.9 | 406.4 | 1314.7 | 1874.2 | 807.1 | 471.7 | 403.0 | 396.2 | 665.1 | 484.4 | 487.9 |
| Prdx2    | 312.0 | 250.5 | 237.6 | 273.6  | 264.1  | 273.0 | 256.6 | 247.2 | 219.7 | 288.8 | 271.3 | 273.9 |
| Prdx3    | 43.4  | 36.8  | 30.5  | 38.2   | 33.3   | 39.1  | 31.1  | 38.2  | 37.3  | 35.2  | 34.1  | 36.2  |
| Prdx4    | 117.2 | 118.6 | 116.2 | 122.4  | 146.9  | 135.2 | 117.2 | 134.3 | 132.4 | 112.9 | 109.2 | 115.1 |
| Prdx5    | 297.9 | 286.9 | 271.9 | 322.1  | 293.9  | 264.0 | 307.6 | 252.4 | 249.1 | 249.5 | 250.0 | 274.9 |
| Prdx6    | 77.0  | 58.4  | 40.7  | 105.9  | 75.8   | 96.8  | 41.7  | 48.3  | 39.7  | 65.8  | 50.2  | 40.6  |
| Prdx6b   | 0.1   | 0.0   | 0.0   | 0.0    | 0.1    | 0.0   | 0.0   | 0.0   | 0.0   | 0.0   | 0.0   | 0.0   |
| Preb     | 6.2   | 7.1   | 6.7   | 6.7    | 7.6    | 7.1   | 7.6   | 6.7   | 6.5   | 6.8   | 7.1   | 6.7   |
| Prelid1  | 158.9 | 135.6 | 128.2 | 168.7  | 154.8  | 154.1 | 177.1 | 173.8 | 157.1 | 141.3 | 179.2 | 157.9 |
| Prelid2  | 5.7   | 6.5   | 4.0   | 3.7    | 3.6    | 7.4   | 5.2   | 3.3   | 4.8   | 3.9   | 4.7   | 4.4   |
| Prelp    | 311.4 | 314.1 | 326.6 | 376.7  | 323.0  | 298.6 | 393.0 | 173.1 | 205.6 | 191.1 | 230.9 | 250.7 |
| Prep     | 23.4  | 13.9  | 14.2  | 20.9   | 18.4   | 18.4  | 19.1  | 19.0  | 15.1  | 16.8  | 20.2  | 17.0  |
| Prepl    | 8.5   | 7.4   | 7.0   | 8.3    | 8.1    | 7.5   | 7.4   | 6.7   | 7.7   | 10.5  | 9.6   | 8.0   |
| Prex1    | 1.2   | 0.9   | 0.8   | 5.0    | 8.0    | 1.4   | 1.5   | 0.6   | 0.5   | 0.8   | 0.6   | 0.7   |
| Prex2    | 12.6  | 15.1  | 14.9  | 12.3   | 7.8    | 12.1  | 11.4  | 7.9   | 13.6  | 7.3   | 11.2  | 11.5  |
| Prg2     | 0.0   | 0.1   | 0.0   | 0.0    | 0.0    | 0.1   | 0.1   | 0.0   | 0.0   | 0.0   | 0.0   | 0.1   |
| Prg4     | 0.5   | 0.4   | 0.2   | 0.2    | 0.3    | 0.2   | 0.1   | 0.4   | 0.3   | 0.3   | 0.2   | 0.2   |
| Prickle1 | 0.9   | 1.6   | 1.9   | 0.5    | 0.6    | 0.4   | 1.1   | 1.9   | 2.4   | 5.4   | 2.8   | 3.4   |
| Prickle2 | 2.2   | 2.5   | 3.0   | 1.5    | 2.0    | 1.7   | 1.8   | 2.1   | 2.0   | 2.3   | 1.8   | 1.9   |
| Prickle3 | 3.8   | 3.7   | 3.9   | 5.1    | 5.3    | 4.0   | 4.4   | 5.1   | 4.7   | 4.1   | 4.4   | 3.6   |
| Prim1    | 2.6   | 4.1   | 5.1   | 1.6    | 4.9    | 2.3   | 5.0   | 2.9   | 4.4   | 2.2   | 3.6   | 2.9   |
| Prim2    | 7.7   | 9.4   | 11.9  | 8.0    | 9.2    | 5.6   | 13.1  | 9.5   | 8.2   | 6.3   | 9.1   | 8.8   |
| Prkaa1   | 10.8  | 11.9  | 13.2  | 12.8   | 11.8   | 12.3  | 12.7  | 13.4  | 12.2  | 12.3  | 15.0  | 14.7  |
| Prkaa2   | 0.5   | 0.6   | 0.5   | 0.4    | 0.3    | 0.6   | 0.2   | 0.2   | 0.1   | 0.3   | 0.2   | 0.3   |
| Prkab1   | 5.5   | 5.6   | 6.3   | 7.0    | 6.8    | 5.5   | 6.9   | 7.9   | 6.1   | 7.8   | 8.0   | 7.8   |
| Prkab2   | 14.2  | 13.6  | 11.2  | 15.7   | 11.8   | 17.7  | 13.4  | 8.4   | 13.9  | 10.9  | 14.0  | 14.0  |
| Prkaca   | 31.5  | 33.6  | 32.6  | 32.0   | 28.4   | 34.2  | 31.6  | 28.4  | 28.8  | 27.1  | 28.8  | 28.4  |
| Prkacb   | 26.4  | 26.3  | 25.2  | 33.7   | 28.1   | 29.8  | 28.3  | 21.1  | 24.8  | 24.3  | 25.8  | 28.3  |
| Prkag1   | 32.9  | 31.4  | 29.9  | 28.3   | 28.5   | 27.6  | 31.4  | 30.8  | 29.4  | 31.5  | 33.4  | 30.3  |
| Prkag2   | 6.0   | 4.0   | 2.9   | 6.3    | 4.0    | 4.5   | 5.0   | 2.8   | 4.1   | 5.8   | 5.6   | 3.9   |
| Prkag3   | 0.0   | 0.0   | 0.0   | 0.0    | 0.0    | 0.0   | 0.0   | 0.0   | 0.0   | 0.0   | 0.0   | 0.1   |
| Prkar1a  | 101.9 | 112.7 | 119.8 | 88.5   | 106.2  | 93.8  | 115.3 | 109.7 | 130.8 | 138.6 | 123.6 | 160.5 |
| Prkar1b  | 3.0   | 3.2   | 1.6   | 3.7    | 1.3    | 5.9   | 1.3   | 0.5   | 0.8   | 2.9   | 2.5   | 2.3   |
| Prkar2a  | 11.1  | 10.2  | 8.7   | 14.2   | 9.6    | 12.2  | 12.5  | 8.5   | 9.3   | 10.4  | 12.8  | 10.4  |
| Prkar2b  | 9.3   | 11.3  | 11.5  | 14.5   | 14.3   | 16.9  | 9.6   | 10.0  | 9.2   | 8.0   | 7.1   | 7.8   |
| Prkca    | 3.2   | 3.7   | 4.4   | 3.1    | 3.9    | 2.9   | 3.9   | 3.8   | 3.2   | 4.0   | 4.6   | 3.8   |
| Prkcb    | 0.9   | 0.0   | 0.1   | 6.5    | 13.1   | 0.0   | 1.8   | 0.1   | 0.3   | 0.9   | 0.3   | 0.8   |
| Prkcd    | 22.1  | 24.2  | 24.1  | 28.4   | 34.3   | 22.6  | 23.2  | 19.3  | 24.0  | 27.0  | 23.9  | 24.7  |
| Prkcdbp  | 48.3  | 38.6  | 49.3  | 41.1   | 30.8   | 36.5  | 53.1  | 118.7 | 69.9  | 49.2  | 58.8  | 48.3  |
| Prkce    | 2.0   | 2.7   | 2.8   | 2.0    | 1.9    | 1.9   | 2.4   | 2.6   | 2.5   | 2.2   | 2.0   | 2.3   |
| Prkcg    | 0.1   | 0.1   | 0.1   | 0.1    | 0.1    | 0.1   | 0.2   | 0.1   | 0.2   | 0.1   | 0.1   | 0.1   |
| Prkch    | 0.6   | 0.2   | 0.3   | 2.3    | 3.6    | 0.2   | 0.6   | 0.5   | 0.4   | 0.4   | 0.3   | 0.4   |
| Prkci    | 12.8  | 13.8  | 13.5  | 10.7   | 9.1    | 13.8  | 10.5  | 11.7  | 12.4  | 12.3  | 13.5  | 12.1  |
| Prkccq   | 0.7   | 0.5   | 0.2   | 0.9    | 0.5    | 0.5   | 0.4   | 0.4   | 0.5   | 0.2   | 0.5   | 0.2   |
| Prkcsh   | 91.3  | 77.9  | 74.1  | 98.9   | 84.0   | 95.6  | 83.6  | 83.9  | 76.9  | 85.0  | 79.3  | 74.5  |
| Prkcz    | 1.4   | 0.9   | 0.7   | 1.7    | 0.7    | 2.0   | 0.9   | 0.6   | 0.7   | 2.3   | 1.5   | 0.9   |
| Prkd1    | 3.5   | 3.3   | 3.4   | 1.4    | 2.0    | 1.6   | 3.2   | 2.5   | 4.0   | 4.2   | 4.1   | 3.9   |
| Prkd2    | 2.4   | 3.0   | 3.8   | 2.8    | 2.7    | 3.6   | 3.3   | 2.3   | 2.6   | 2.4   | 2.3   | 2.6   |
| Prkd3    | 10.4  | 11.2  | 12.4  | 9.5    | 8.9    | 11.0  | 9.6   | 11.6  | 11.5  | 11.0  | 11.2  | 12.3  |
| Prkdc    | 2.6   | 3.0   | 3.0   | 2.3    | 2.6    | 2.8   | 2.2   | 2.9   | 2.3   | 2.0   | 2.5   | 2.2   |
| Prkg1    | 14.5  | 22.6  | 28.0  | 17.3   | 20.0   | 15.4  | 26.5  | 27.0  | 27.7  | 18.3  | 23.9  | 28.4  |
| Prkg2    | 0.2   | 0.1   | 0.1   | 0.2    | 0.3    | 0.2   | 0.2   | 0.1   | 0.2   | 0.8   | 0.5   | 0.4   |
| Prkra    | 19.5  | 21.0  | 19.8  | 16.9   | 16.2   | 17.8  | 17.0  | 20.8  | 19.2  | 19.3  | 18.9  | 19.7  |
| Prkrip1  | 10.1  | 9.2   | 9.1   | 12.1   | 8.4    | 9.3   | 10.1  | 9.8   | 8.7   | 10.1  | 11.2  | 11.3  |
| Prkrir   | 18.1  | 16.6  | 17.3  | 17.5   | 16.3   | 17.0  | 19.5  | 19.2  | 19.2  | 19.9  | 22.2  | 21.2  |

Online Table 1

|           |       |       |       |       |       |       |       |       |       |       |       |       |
|-----------|-------|-------|-------|-------|-------|-------|-------|-------|-------|-------|-------|-------|
| Prkx      | 10.9  | 9.9   | 6.9   | 12.9  | 12.4  | 8.8   | 9.5   | 7.2   | 8.9   | 7.4   | 10.2  | 8.7   |
| Prl       | 0.4   | 0.1   | 0.0   | 0.0   | 0.0   | 0.0   | 0.0   | 0.1   | 0.1   | 0.1   | 0.1   | 0.1   |
| Prl2c2    | 0.3   | 0.3   | 0.0   | 0.5   | 0.5   | 1.8   | 0.1   | 0.4   | 0.3   | 0.5   | 0.4   | 0.2   |
| Prl2c3    | 0.0   | 0.0   | 0.2   | 0.5   | 0.8   | 1.8   | 0.2   | 0.0   | 0.0   | 0.0   | 0.0   | 0.0   |
| Prl2c4    | 0.2   | 0.3   | 0.0   | 0.0   | 0.0   | 0.0   | 0.0   | 0.5   | 0.3   | 0.4   | 0.6   | 0.1   |
| Prl2c5    | 0.0   | 0.0   | 0.1   | 0.1   | 0.1   | 0.0   | 0.0   | 0.0   | 0.0   | 0.0   | 0.0   | 0.0   |
| Prl3a1    | 2.7   | 1.6   | 0.3   | 1.4   | 0.2   | 1.4   | 0.3   | 0.4   | 0.1   | 0.2   | 0.4   | 0.3   |
| Prl7a1    | 0.8   | 0.4   | 0.4   | 0.5   | 0.4   | 0.7   | 0.0   | 0.5   | 0.0   | 0.2   | 0.0   | 0.2   |
| Prl7a2    | 0.1   | 0.0   | 0.0   | 0.0   | 0.0   | 0.2   | 0.1   | 0.0   | 0.0   | 0.0   | 0.0   | 0.0   |
| Prl7b1    | 0.1   | 0.0   | 0.0   | 0.0   | 0.1   | 0.0   | 0.0   | 0.0   | 0.0   | 0.0   | 0.0   | 0.0   |
| Prl7d1    | 0.1   | 0.0   | 0.1   | 0.0   | 0.1   | 0.0   | 0.0   | 0.0   | 0.0   | 0.0   | 0.1   | 0.0   |
| Prl8a9    | 0.1   | 0.0   | 0.1   | 0.0   | 0.0   | 0.0   | 0.0   | 0.1   | 0.0   | 0.0   | 0.0   | 0.1   |
| Prlr      | 0.1   | 0.0   | 0.0   | 0.0   | 0.0   | 0.0   | 0.0   | 0.0   | 0.0   | 0.0   | 0.0   | 0.0   |
| Prmt1     | 22.3  | 21.8  | 21.5  | 19.2  | 22.8  | 22.2  | 22.3  | 23.9  | 20.6  | 23.4  | 23.4  | 20.0  |
| Prmt10    | 6.5   | 6.3   | 5.2   | 6.2   | 5.3   | 6.8   | 4.6   | 5.0   | 4.8   | 5.0   | 5.6   | 6.0   |
| Prmt2     | 20.9  | 18.6  | 15.2  | 22.0  | 19.8  | 21.4  | 20.5  | 17.6  | 19.1  | 17.5  | 20.8  | 18.3  |
| Prmt3     | 11.7  | 10.2  | 8.3   | 11.6  | 9.6   | 10.2  | 11.0  | 9.7   | 10.4  | 11.7  | 12.6  | 10.1  |
| Prmt5     | 15.5  | 12.7  | 11.8  | 15.7  | 13.2  | 16.1  | 14.7  | 13.5  | 12.0  | 15.3  | 16.9  | 13.4  |
| Prmt6     | 2.9   | 2.5   | 2.6   | 3.3   | 3.2   | 3.2   | 3.1   | 3.4   | 3.7   | 4.2   | 3.9   | 3.6   |
| Prmt7     | 9.4   | 9.8   | 8.0   | 9.6   | 8.7   | 9.6   | 9.5   | 8.9   | 9.3   | 8.8   | 8.6   | 9.1   |
| Prnd      | 3.9   | 1.1   | 2.1   | 2.0   | 2.0   | 0.7   | 2.6   | 4.6   | 2.9   | 0.5   | 0.8   | 0.7   |
| Prnp      | 329.9 | 220.5 | 171.8 | 346.3 | 198.5 | 242.7 | 183.9 | 172.9 | 193.3 | 242.9 | 230.8 | 234.2 |
| Prob1     | 0.1   | 0.2   | 0.2   | 0.1   | 0.1   | 0.4   | 0.1   | 0.2   | 0.1   | 0.1   | 0.1   | 0.1   |
| Proca1    | 0.4   | 0.4   | 0.4   | 0.9   | 0.4   | 0.4   | 0.3   | 0.6   | 0.3   | 0.4   | 0.5   | 0.9   |
| Procr     | 19.9  | 12.5  | 8.6   | 48.2  | 49.4  | 36.2  | 11.2  | 6.4   | 4.7   | 12.1  | 8.4   | 7.6   |
| Prodh     | 0.7   | 0.8   | 0.4   | 1.5   | 0.5   | 0.9   | 0.5   | 0.3   | 0.3   | 0.3   | 0.2   | 0.3   |
| Prokr1    | 0.0   | 0.1   | 0.0   | 0.1   | 0.2   | 0.0   | 0.0   | 0.0   | 0.0   | 0.0   | 0.0   | 0.0   |
| Prokr2    | 0.0   | 0.1   | 0.0   | 0.0   | 0.0   | 0.0   | 0.1   | 0.1   | 0.0   | 0.0   | 0.0   | 0.0   |
| Prom1     | 0.0   | 0.0   | 0.0   | 0.1   | 0.0   | 0.0   | 0.0   | 0.0   | 0.0   | 0.0   | 0.0   | 0.0   |
| Prorsd1   | 6.7   | 6.1   | 5.7   | 6.6   | 6.3   | 7.6   | 5.1   | 5.4   | 6.0   | 7.4   | 7.0   | 7.1   |
| Pros1     | 26.4  | 29.0  | 36.7  | 21.4  | 34.2  | 21.9  | 27.2  | 26.4  | 28.2  | 33.1  | 26.3  | 33.0  |
| Prosapip1 | 3.2   | 4.0   | 3.4   | 3.9   | 2.9   | 4.4   | 3.3   | 2.6   | 2.4   | 2.3   | 2.6   | 2.3   |
| Prosc     | 13.8  | 12.1  | 9.8   | 12.4  | 10.7  | 13.4  | 10.1  | 9.1   | 10.0  | 12.6  | 11.8  | 10.0  |
| Proser1   | 0.4   | 0.3   | 0.7   | 0.2   | 0.6   | 0.5   | 0.7   | 0.5   | 0.5   | 0.3   | 0.4   | 0.3   |
| Proser2   | 0.0   | 0.0   | 0.0   | 0.0   | 0.0   | 0.0   | 0.0   | 0.0   | 0.0   | 0.0   | 0.0   | 0.0   |
| Prox1     | 0.1   | 0.1   | 0.1   | 0.1   | 0.1   | 0.2   | 0.2   | 0.1   | 0.1   | 0.1   | 0.1   | 0.1   |
| Prox2     | 0.5   | 0.7   | 0.7   | 0.5   | 0.4   | 0.6   | 0.5   | 0.7   | 0.6   | 0.4   | 0.5   | 0.7   |
| Proz      | 0.2   | 0.1   | 0.1   | 0.0   | 0.1   | 0.1   | 0.1   | 0.1   | 0.1   | 0.1   | 0.1   | 0.1   |
| Prpf18    | 11.3  | 12.2  | 12.8  | 9.7   | 10.3  | 10.1  | 10.0  | 12.3  | 11.5  | 12.5  | 13.4  | 12.8  |
| Prpf19    | 8.4   | 6.9   | 6.2   | 8.1   | 7.1   | 7.6   | 6.3   | 6.3   | 6.3   | 7.6   | 6.9   | 6.9   |
| Prpf3     | 7.0   | 8.4   | 8.8   | 10.3  | 8.0   | 8.3   | 8.5   | 7.9   | 7.0   | 8.1   | 9.3   | 9.2   |
| Prpf31    | 13.2  | 11.8  | 11.9  | 16.3  | 12.7  | 13.1  | 11.9  | 11.8  | 9.8   | 11.2  | 12.9  | 11.9  |
| Prpf38a   | 16.2  | 14.4  | 14.5  | 16.5  | 12.6  | 13.7  | 13.1  | 12.9  | 11.7  | 14.1  | 14.4  | 14.8  |
| Prpf38b   | 12.4  | 13.2  | 21.1  | 15.6  | 13.8  | 12.2  | 19.7  | 15.9  | 13.4  | 15.1  | 18.5  | 21.8  |
| Prpf39    | 4.9   | 5.4   | 7.4   | 5.8   | 5.9   | 5.2   | 6.0   | 5.8   | 5.2   | 6.7   | 6.8   | 6.7   |
| Prpf4     | 3.3   | 4.0   | 3.8   | 3.5   | 4.1   | 3.7   | 3.9   | 3.7   | 3.4   | 3.6   | 3.9   | 3.7   |
| Prpf40a   | 26.2  | 27.2  | 28.4  | 28.8  | 26.1  | 24.6  | 26.7  | 26.1  | 22.5  | 24.5  | 31.3  | 31.1  |
| Prpf40b   | 3.9   | 4.0   | 4.7   | 2.4   | 2.8   | 4.8   | 3.1   | 3.7   | 3.7   | 3.3   | 3.1   | 3.5   |
| Prpf4b    | 16.5  | 16.7  | 18.8  | 16.3  | 16.5  | 14.6  | 18.0  | 16.9  | 16.8  | 18.4  | 21.0  | 21.3  |
| Prpf6     | 29.9  | 29.4  | 29.4  | 34.2  | 26.6  | 32.4  | 29.4  | 29.4  | 23.6  | 28.7  | 29.6  | 31.4  |
| Prpf8     | 27.6  | 28.6  | 30.7  | 27.2  | 29.8  | 27.7  | 26.9  | 30.4  | 25.4  | 27.1  | 26.6  | 27.2  |
| Prph      | 0.1   | 0.2   | 0.1   | 0.1   | 0.4   | 0.1   | 0.1   | 0.1   | 0.1   | 0.5   | 0.3   | 0.2   |
| Prph2     | 0.1   | 0.0   | 0.0   | 0.0   | 0.0   | 0.0   | 0.0   | 0.0   | 0.0   | 0.0   | 0.0   | 0.0   |
| Prps1     | 6.3   | 6.6   | 6.1   | 5.3   | 5.5   | 5.5   | 6.3   | 5.9   | 5.9   | 6.0   | 5.8   | 5.5   |
| Prps1i3   | 6.2   | 6.7   | 6.7   | 5.3   | 5.9   | 5.7   | 6.4   | 6.4   | 6.8   | 7.2   | 8.0   | 6.9   |
| Prps2     | 17.4  | 16.6  | 15.8  | 17.1  | 16.9  | 19.6  | 13.6  | 10.4  | 12.6  | 17.3  | 16.0  | 15.7  |
| Prpsap1   | 25.3  | 24.2  | 20.8  | 21.2  | 20.2  | 20.0  | 21.5  | 21.8  | 21.6  | 21.6  | 19.4  | 19.4  |

Online Table 1

|         |       |       |       |       |       |       |       |       |       |       |       |       |
|---------|-------|-------|-------|-------|-------|-------|-------|-------|-------|-------|-------|-------|
| Prpsap2 | 8.4   | 8.2   | 6.8   | 8.3   | 7.7   | 9.8   | 6.4   | 7.5   | 8.0   | 9.0   | 8.5   | 8.2   |
| Prr11   | 0.5   | 0.9   | 1.7   | 0.3   | 1.0   | 0.2   | 1.5   | 0.5   | 1.2   | 0.6   | 0.9   | 0.7   |
| Prr12   | 0.5   | 1.1   | 1.1   | 0.5   | 0.7   | 0.9   | 1.0   | 0.9   | 1.1   | 0.8   | 0.6   | 0.7   |
| Prr13   | 88.3  | 83.8  | 69.7  | 160.6 | 94.1  | 127.3 | 86.2  | 77.5  | 64.9  | 68.9  | 80.8  | 68.9  |
| Prr14   | 8.7   | 8.8   | 9.5   | 8.4   | 8.2   | 7.3   | 11.0  | 10.0  | 9.8   | 8.2   | 9.2   | 8.3   |
| Prr14l  | 5.8   | 6.7   | 5.6   | 4.7   | 5.7   | 4.9   | 5.2   | 5.9   | 6.0   | 6.6   | 6.2   | 6.4   |
| Prr15   | 0.3   | 0.6   | 0.2   | 0.3   | 0.5   | 0.2   | 0.2   | 1.3   | 0.9   | 7.7   | 2.6   | 1.1   |
| Prr15l  | 0.1   | 0.1   | 0.0   | 0.0   | 0.1   | 0.0   | 0.1   | 0.1   | 0.1   | 0.4   | 0.3   | 0.1   |
| Prr16   | 0.3   | 0.5   | 0.7   | 0.1   | 0.3   | 0.1   | 0.3   | 0.3   | 0.1   | 0.2   | 0.1   | 0.4   |
| Prr18   | 0.0   | 0.0   | 0.0   | 0.0   | 0.1   | 0.1   | 0.0   | 0.0   | 0.0   | 0.0   | 0.0   | 0.0   |
| Prr22   | 0.0   | 0.1   | 0.0   | 0.0   | 0.0   | 0.0   | 0.1   | 0.1   | 0.1   | 0.1   | 0.0   | 0.1   |
| Prr24   | 3.3   | 3.0   | 2.9   | 4.4   | 2.8   | 3.3   | 3.6   | 3.4   | 4.0   | 3.1   | 3.1   | 3.1   |
| Prr3    | 3.8   | 4.5   | 5.0   | 3.2   | 3.7   | 3.5   | 4.0   | 4.1   | 4.0   | 3.5   | 3.4   | 4.2   |
| Prr5    | 1.9   | 1.8   | 1.7   | 1.3   | 1.4   | 1.5   | 2.5   | 1.7   | 1.7   | 2.1   | 2.5   | 1.4   |
| Prr5l   | 0.2   | 0.2   | 0.2   | 0.2   | 0.2   | 0.1   | 0.1   | 0.0   | 0.1   | 0.2   | 0.2   | 0.1   |
| Prr7    | 0.5   | 0.4   | 0.3   | 0.2   | 0.8   | 0.5   | 0.2   | 0.8   | 0.9   | 0.8   | 0.3   | 0.4   |
| Prrc1   | 9.1   | 11.1  | 10.5  | 9.0   | 9.4   | 10.0  | 10.1  | 11.7  | 11.1  | 8.9   | 10.4  | 9.4   |
| Prrc2a  | 6.0   | 10.2  | 10.2  | 6.9   | 9.0   | 7.1   | 11.6  | 8.3   | 9.1   | 7.6   | 7.5   | 6.2   |
| Prrc2b  | 10.4  | 12.3  | 11.3  | 10.3  | 10.3  | 11.2  | 12.3  | 9.0   | 10.2  | 10.1  | 9.3   | 8.5   |
| Prrc2c  | 13.1  | 14.9  | 17.4  | 14.9  | 16.3  | 12.9  | 18.9  | 15.2  | 14.0  | 13.1  | 14.9  | 14.6  |
| Prrg1   | 0.7   | 0.7   | 2.3   | 1.0   | 1.2   | 1.0   | 1.3   | 1.9   | 0.8   | 0.6   | 0.9   | 1.2   |
| Prrg2   | 5.4   | 5.6   | 5.6   | 7.6   | 6.4   | 7.4   | 6.5   | 6.3   | 7.3   | 6.3   | 6.7   | 7.0   |
| Prrg3   | 5.8   | 5.4   | 6.0   | 5.0   | 4.3   | 4.5   | 6.1   | 5.9   | 4.2   | 3.7   | 4.2   | 4.9   |
| Prrg4   | 3.8   | 3.2   | 3.0   | 3.7   | 3.7   | 4.4   | 2.9   | 1.0   | 1.9   | 1.5   | 1.9   | 1.5   |
| Prrt1   | 0.9   | 0.0   | 0.0   | 0.0   | 0.1   | 0.0   | 3.2   | 0.0   | 0.0   | 0.0   | 0.0   | 0.0   |
| Prrt2   | 0.1   | 0.7   | 1.1   | 0.1   | 0.3   | 0.3   | 0.5   | 0.6   | 0.6   | 0.2   | 0.2   | 0.3   |
| Prrt3   | 0.0   | 0.0   | 0.0   | 0.1   | 0.1   | 0.1   | 0.0   | 0.1   | 0.0   | 0.0   | 0.1   | 0.1   |
| Prrt4   | 0.4   | 0.3   | 0.2   | 0.3   | 0.2   | 0.4   | 0.7   | 0.5   | 0.5   | 0.2   | 0.3   | 0.3   |
| Prrx1   | 11.5  | 17.0  | 20.1  | 14.6  | 15.4  | 18.4  | 16.7  | 17.1  | 19.9  | 16.8  | 16.6  | 22.8  |
| Prrx2   | 3.0   | 4.0   | 5.9   | 0.8   | 3.0   | 1.8   | 4.4   | 6.7   | 5.4   | 6.5   | 7.3   | 7.2   |
| Prss12  | 4.5   | 2.4   | 1.8   | 1.1   | 1.5   | 1.2   | 1.6   | 2.6   | 1.8   | 7.0   | 5.3   | 4.5   |
| Prss16  | 0.1   | 0.1   | 0.1   | 0.2   | 0.3   | 0.1   | 0.1   | 0.0   | 0.1   | 0.2   | 0.0   | 0.2   |
| Prss23  | 246.8 | 176.3 | 122.7 | 228.8 | 139.0 | 211.8 | 231.8 | 162.2 | 280.6 | 248.1 | 321.1 | 260.2 |
| Prss27  | 0.3   | 0.2   | 0.4   | 0.1   | 0.3   | 0.2   | 0.1   | 0.2   | 0.2   | 0.2   | 0.1   | 0.2   |
| Prss30  | 0.0   | 0.0   | 0.0   | 0.0   | 0.1   | 0.0   | 0.0   | 0.0   | 0.0   | 0.0   | 0.0   | 0.0   |
| Prss33  | 0.0   | 0.0   | 0.1   | 0.0   | 0.0   | 0.0   | 0.0   | 0.0   | 0.1   | 0.0   | 0.0   | 0.0   |
| Prss35  | 0.1   | 0.1   | 0.2   | 0.0   | 0.0   | 0.0   | 0.1   | 0.1   | 0.1   | 0.3   | 0.2   | 0.4   |
| Prss36  | 1.5   | 1.4   | 1.0   | 1.5   | 0.9   | 2.0   | 1.0   | 0.9   | 0.9   | 1.6   | 1.0   | 1.0   |
| Prss45  | 0.1   | 0.1   | 0.0   | 0.0   | 0.1   | 0.2   | 0.0   | 0.0   | 0.1   | 0.0   | 0.0   | 0.0   |
| Prss46  | 0.1   | 0.0   | 0.1   | 0.3   | 0.2   | 0.1   | 0.1   | 0.0   | 0.1   | 0.2   | 0.2   | 0.2   |
| Prss48  | 0.1   | 0.0   | 0.0   | 0.0   | 0.0   | 0.1   | 0.0   | 0.0   | 0.0   | 0.0   | 0.0   | 0.0   |
| Prss50  | 0.0   | 0.0   | 0.0   | 0.0   | 0.0   | 0.0   | 0.0   | 0.0   | 0.0   | 0.0   | 0.0   | 0.0   |
| Prss53  | 1.1   | 1.0   | 1.2   | 1.1   | 1.2   | 1.4   | 1.0   | 1.3   | 1.2   | 1.1   | 1.1   | 0.9   |
| Prss57  | 13.0  | 8.8   | 8.2   | 19.0  | 10.0  | 13.9  | 17.0  | 9.5   | 12.1  | 9.1   | 12.6  | 15.2  |
| Prss8   | 0.0   | 0.1   | 0.1   | 0.0   | 0.0   | 0.0   | 0.0   | 0.0   | 0.0   | 0.0   | 0.1   | 0.0   |
| Prtg    | 0.0   | 0.0   | 0.0   | 0.1   | 0.0   | 0.0   | 0.0   | 0.0   | 0.0   | 0.0   | 0.0   | 0.0   |
| Prtn3   | 0.1   | 0.0   | 0.1   | 0.0   | 0.0   | 0.0   | 0.0   | 0.0   | 0.0   | 0.1   | 0.0   | 0.1   |
| Prune   | 7.5   | 8.5   | 8.5   | 7.0   | 6.4   | 9.5   | 8.5   | 9.1   | 8.4   | 7.7   | 8.2   | 8.3   |
| Prune2  | 1.5   | 0.9   | 0.4   | 1.3   | 1.1   | 1.8   | 0.8   | 0.5   | 0.4   | 0.3   | 0.8   | 0.4   |
| Prx     | 0.3   | 0.3   | 0.3   | 0.2   | 0.3   | 0.2   | 0.3   | 0.3   | 0.4   | 0.4   | 0.3   | 0.2   |
| Psap    | 360.2 | 300.4 | 278.8 | 481.5 | 535.1 | 413.8 | 260.2 | 309.1 | 289.8 | 330.6 | 290.7 | 296.1 |
| Psat1   | 11.0  | 7.3   | 7.4   | 5.0   | 5.0   | 4.1   | 9.3   | 28.3  | 11.6  | 10.9  | 17.3  | 6.9   |
| Psd     | 0.3   | 0.3   | 0.3   | 0.3   | 0.4   | 0.3   | 0.4   | 0.4   | 0.5   | 0.5   | 0.4   | 0.4   |
| Psd2    | 1.6   | 1.6   | 0.8   | 1.9   | 1.4   | 2.0   | 0.8   | 0.4   | 0.4   | 0.7   | 0.7   | 0.6   |
| Psd3    | 10.0  | 14.2  | 15.4  | 8.9   | 12.0  | 8.9   | 12.9  | 15.4  | 14.8  | 8.3   | 11.2  | 13.1  |
| Psd4    | 0.3   | 0.0   | 0.0   | 2.3   | 4.4   | 0.0   | 0.5   | 0.1   | 0.1   | 0.3   | 0.2   | 0.3   |
| Psen1   | 25.6  | 26.5  | 24.2  | 31.1  | 26.6  | 25.3  | 32.9  | 28.9  | 26.0  | 28.2  | 29.1  | 27.9  |

Online Table 1

|         |       |       |       |       |       |       |       |       |       |       |       |       |
|---------|-------|-------|-------|-------|-------|-------|-------|-------|-------|-------|-------|-------|
| Psen2   | 12.0  | 12.3  | 10.1  | 17.4  | 15.2  | 15.9  | 13.8  | 11.2  | 11.3  | 16.2  | 12.9  | 12.0  |
| Psenen  | 53.7  | 38.7  | 44.4  | 60.8  | 44.4  | 52.1  | 43.0  | 47.0  | 41.5  | 48.5  | 46.3  | 50.2  |
| Psg17   | 0.0   | 0.1   | 0.1   | 0.2   | 0.1   | 0.0   | 0.1   | 0.0   | 0.0   | 0.0   | 0.1   | 0.0   |
| Psg23   | 0.2   | 0.4   | 0.2   | 0.3   | 0.3   | 0.2   | 0.3   | 0.3   | 0.1   | 0.3   | 0.2   | 0.1   |
| Psg29   | 0.0   | 0.0   | 0.0   | 0.0   | 0.0   | 0.0   | 0.0   | 0.0   | 0.0   | 0.0   | 0.0   | 0.0   |
| Psip1   | 12.6  | 15.2  | 24.2  | 12.3  | 12.3  | 15.7  | 20.8  | 21.1  | 15.8  | 19.7  | 23.8  | 24.1  |
| Pskh1   | 8.8   | 9.8   | 10.2  | 8.9   | 9.0   | 10.9  | 9.6   | 9.5   | 9.4   | 11.1  | 10.2  | 9.8   |
| Psma1   | 77.8  | 71.9  | 64.6  | 83.3  | 74.2  | 78.8  | 70.0  | 70.0  | 74.6  | 73.4  | 76.1  | 71.5  |
| Psma2   | 155.5 | 142.2 | 119.0 | 161.1 | 127.2 | 139.9 | 128.7 | 123.8 | 118.7 | 141.6 | 143.6 | 139.3 |
| Psma3   | 111.7 | 98.0  | 86.1  | 115.4 | 95.4  | 101.1 | 87.8  | 94.6  | 92.9  | 100.8 | 108.2 | 101.2 |
| Psma4   | 148.5 | 122.1 | 128.0 | 144.5 | 115.7 | 128.5 | 132.5 | 127.9 | 117.1 | 131.2 | 152.8 | 155.2 |
| Psma5   | 55.9  | 48.4  | 44.8  | 51.5  | 51.7  | 49.8  | 42.3  | 49.9  | 50.7  | 53.0  | 51.7  | 47.4  |
| Psma6   | 87.6  | 75.7  | 68.4  | 81.4  | 83.5  | 70.7  | 71.3  | 70.4  | 71.3  | 76.3  | 71.2  | 70.5  |
| Psma7   | 130.6 | 104.4 | 93.0  | 133.7 | 107.5 | 111.5 | 109.1 | 103.5 | 104.4 | 132.0 | 122.3 | 115.7 |
| Psma8   | 2.0   | 1.2   | 1.0   | 2.1   | 1.4   | 1.4   | 1.5   | 0.7   | 0.8   | 0.7   | 0.7   | 0.6   |
| Psemb1  | 137.8 | 120.5 | 108.6 | 123.9 | 121.0 | 123.9 | 118.3 | 128.0 | 125.9 | 137.6 | 137.9 | 132.0 |
| Psemb10 | 10.3  | 7.9   | 8.3   | 18.4  | 18.2  | 8.2   | 11.7  | 7.7   | 9.8   | 11.1  | 8.4   | 10.9  |
| Psemb11 | 0.0   | 0.0   | 0.0   | 0.0   | 0.1   | 0.0   | 0.0   | 0.0   | 0.0   | 0.0   | 0.0   | 0.0   |
| Psemb2  | 98.2  | 83.1  | 86.7  | 109.0 | 96.1  | 95.4  | 112.8 | 111.4 | 92.9  | 103.0 | 113.7 | 101.3 |
| Psemb3  | 150.0 | 127.3 | 110.5 | 146.5 | 125.1 | 131.9 | 130.9 | 130.7 | 121.1 | 120.4 | 127.8 | 119.0 |
| Psemb4  | 143.6 | 131.0 | 101.9 | 113.6 | 119.6 | 120.3 | 115.6 | 118.7 | 129.6 | 133.2 | 109.6 | 116.4 |
| Psemb5  | 75.5  | 68.8  | 50.8  | 72.6  | 75.2  | 73.2  | 62.4  | 62.9  | 66.2  | 68.8  | 59.1  | 59.0  |
| Psemb6  | 94.8  | 86.8  | 83.4  | 101.1 | 86.1  | 97.9  | 86.8  | 82.9  | 80.4  | 88.1  | 86.6  | 82.6  |
| Psemb7  | 127.2 | 111.0 | 97.7  | 116.3 | 103.2 | 112.3 | 95.1  | 104.8 | 99.0  | 104.3 | 108.3 | 104.8 |
| Psemb8  | 7.3   | 6.9   | 10.7  | 13.5  | 17.8  | 6.6   | 7.0   | 5.1   | 4.8   | 5.8   | 4.4   | 6.7   |
| Psemb9  | 2.4   | 3.9   | 4.9   | 2.7   | 3.8   | 2.3   | 2.1   | 1.5   | 1.4   | 1.7   | 1.4   | 2.7   |
| Psmc1   | 98.4  | 85.5  | 80.5  | 96.8  | 75.4  | 86.8  | 84.1  | 78.1  | 74.5  | 77.2  | 89.8  | 89.2  |
| Psmc2   | 56.0  | 56.6  | 55.6  | 60.7  | 57.1  | 56.5  | 59.9  | 57.2  | 55.5  | 57.4  | 58.0  | 59.7  |
| Psmc3   | 106.3 | 97.1  | 92.2  | 114.0 | 93.2  | 104.3 | 102.7 | 96.8  | 92.9  | 96.1  | 107.9 | 100.4 |
| Psmc3ip | 1.8   | 3.2   | 3.6   | 1.3   | 2.7   | 1.6   | 3.3   | 2.4   | 3.1   | 1.7   | 2.9   | 2.5   |
| Psmc4   | 76.8  | 62.6  | 57.5  | 82.4  | 62.2  | 73.1  | 71.9  | 65.7  | 61.6  | 64.9  | 71.9  | 70.7  |
| Psmc5   | 64.0  | 60.8  | 55.7  | 64.6  | 56.4  | 60.4  | 61.1  | 57.9  | 62.0  | 60.6  | 64.6  | 61.2  |
| Psmc6   | 121.1 | 109.6 | 93.6  | 131.3 | 92.5  | 114.1 | 93.7  | 86.2  | 92.5  | 100.4 | 108.2 | 106.1 |
| Psmd1   | 57.0  | 47.8  | 49.8  | 59.4  | 55.5  | 50.4  | 57.7  | 57.6  | 51.7  | 52.5  | 58.7  | 57.9  |
| Psmd10  | 19.2  | 15.8  | 14.2  | 20.6  | 20.6  | 19.1  | 16.9  | 15.7  | 13.6  | 14.8  | 18.5  | 17.6  |
| Psmd11  | 33.3  | 26.7  | 27.7  | 39.1  | 30.9  | 39.6  | 31.4  | 32.0  | 27.2  | 29.0  | 31.7  | 29.7  |
| Psmd12  | 42.7  | 41.8  | 38.2  | 45.2  | 41.3  | 40.0  | 44.3  | 40.5  | 40.4  | 42.9  | 49.7  | 42.9  |
| Psmd13  | 48.0  | 41.6  | 34.2  | 44.7  | 45.7  | 42.0  | 44.3  | 41.5  | 40.9  | 41.5  | 42.1  | 43.1  |
| Psmd14  | 67.7  | 57.7  | 46.7  | 66.3  | 58.5  | 59.4  | 57.4  | 52.3  | 55.5  | 61.3  | 62.8  | 62.1  |
| Psmd2   | 119.0 | 104.3 | 89.1  | 122.3 | 108.5 | 112.7 | 99.7  | 101.7 | 92.7  | 97.6  | 99.1  | 98.3  |
| Psmd3   | 28.0  | 28.3  | 27.5  | 31.4  | 30.3  | 27.0  | 35.6  | 35.7  | 34.0  | 30.5  | 30.7  | 28.1  |
| Psmd4   | 96.6  | 89.8  | 84.4  | 106.0 | 77.7  | 94.4  | 91.6  | 87.9  | 82.4  | 86.8  | 88.7  | 90.5  |
| Psmd5   | 29.9  | 25.9  | 20.0  | 29.9  | 25.2  | 27.4  | 24.2  | 21.3  | 21.8  | 25.4  | 25.2  | 20.9  |
| Psmd6   | 75.4  | 68.0  | 58.9  | 70.2  | 62.3  | 70.3  | 65.6  | 59.7  | 68.5  | 73.0  | 71.5  | 69.1  |
| Psmd7   | 58.0  | 62.1  | 67.3  | 82.6  | 66.9  | 65.7  | 85.9  | 75.7  | 61.9  | 63.7  | 73.9  | 76.7  |
| Psmd8   | 181.9 | 116.8 | 92.9  | 199.9 | 121.9 | 170.6 | 116.3 | 95.9  | 96.2  | 122.6 | 126.3 | 120.3 |
| Psmd9   | 8.7   | 8.0   | 8.5   | 8.8   | 8.2   | 7.9   | 8.9   | 8.2   | 8.9   | 8.9   | 9.4   | 9.1   |
| Psme1   | 39.0  | 39.8  | 53.6  | 45.2  | 47.0  | 37.5  | 43.6  | 46.2  | 38.6  | 38.9  | 39.7  | 49.3  |
| Psme2   | 87.5  | 74.1  | 65.2  | 92.0  | 87.0  | 80.6  | 74.3  | 55.3  | 69.7  | 70.8  | 57.7  | 75.4  |
| Psme3   | 18.7  | 17.6  | 17.3  | 21.6  | 17.9  | 19.1  | 18.5  | 18.3  | 16.6  | 16.7  | 17.5  | 17.7  |
| Psme4   | 18.9  | 21.6  | 16.6  | 16.5  | 20.8  | 16.5  | 15.4  | 20.3  | 18.7  | 17.6  | 20.4  | 17.9  |
| Psmf1   | 6.9   | 6.5   | 5.4   | 7.8   | 6.0   | 7.6   | 6.5   | 6.2   | 5.9   | 5.9   | 5.9   | 5.8   |
| Psmg1   | 13.9  | 14.3  | 12.3  | 12.8  | 12.5  | 14.7  | 12.6  | 14.7  | 12.5  | 15.0  | 13.7  | 13.3  |
| Psmg2   | 13.9  | 15.1  | 12.9  | 11.5  | 13.0  | 13.6  | 12.0  | 11.0  | 13.2  | 14.5  | 13.3  | 12.3  |
| Psmg3   | 7.0   | 6.8   | 5.6   | 6.6   | 8.6   | 7.1   | 7.1   | 7.9   | 8.6   | 7.5   | 5.7   | 6.0   |
| Psmg4   | 9.5   | 8.9   | 6.5   | 7.8   | 10.9  | 10.1  | 9.0   | 8.4   | 8.2   | 8.5   | 6.8   | 7.3   |
| Pspc1   | 7.1   | 7.5   | 8.8   | 6.6   | 6.6   | 7.8   | 9.7   | 6.8   | 6.0   | 8.1   | 8.3   | 9.5   |

Online Table 1

|         |       |       |       |       |       |       |       |       |       |       |       |       |
|---------|-------|-------|-------|-------|-------|-------|-------|-------|-------|-------|-------|-------|
| Psph    | 27.1  | 18.0  | 11.8  | 25.6  | 13.6  | 21.7  | 20.1  | 21.4  | 19.7  | 18.9  | 25.6  | 14.6  |
| Pspn    | 1.0   | 0.0   | 0.4   | 0.3   | 0.3   | 0.8   | 0.1   | 0.3   | 0.3   | 0.0   | 0.0   | 0.2   |
| Psrc1   | 17.6  | 19.5  | 22.1  | 13.0  | 15.2  | 20.0  | 14.5  | 13.2  | 14.6  | 31.5  | 18.7  | 19.6  |
| Pstk    | 7.8   | 6.9   | 5.6   | 6.5   | 5.7   | 8.8   | 6.8   | 6.0   | 7.6   | 6.8   | 7.2   | 6.0   |
| Pstpip1 | 7.6   | 5.5   | 5.6   | 14.2  | 14.5  | 6.0   | 9.9   | 5.9   | 6.7   | 8.9   | 9.6   | 6.5   |
| Pstpip2 | 0.5   | 0.3   | 0.4   | 0.4   | 0.6   | 0.2   | 0.6   | 0.3   | 0.2   | 0.3   | 0.5   | 0.3   |
| Ptafr   | 0.1   | 0.0   | 0.1   | 2.2   | 1.9   | 0.0   | 0.3   | 0.2   | 0.1   | 0.2   | 0.0   | 0.0   |
| Ptar1   | 6.7   | 5.7   | 4.9   | 6.2   | 5.8   | 5.9   | 6.2   | 6.1   | 6.4   | 6.9   | 7.8   | 6.7   |
| Ptbp1   | 39.2  | 38.0  | 34.6  | 46.0  | 48.4  | 36.1  | 51.2  | 45.6  | 42.7  | 43.8  | 48.1  | 37.9  |
| Ptbp2   | 3.4   | 4.7   | 5.6   | 4.2   | 4.1   | 4.2   | 4.1   | 4.3   | 4.2   | 3.9   | 4.5   | 4.8   |
| Ptbp3   | 8.8   | 13.6  | 14.9  | 13.0  | 16.3  | 10.9  | 14.2  | 15.0  | 13.7  | 11.8  | 14.1  | 14.4  |
| Ptcd1   | 7.1   | 5.7   | 5.4   | 6.3   | 5.5   | 6.7   | 6.4   | 6.1   | 6.2   | 6.8   | 6.6   | 7.1   |
| Ptcd2   | 9.7   | 9.0   | 6.9   | 9.9   | 9.5   | 10.4  | 8.3   | 8.0   | 8.1   | 9.2   | 8.7   | 7.2   |
| Ptcd3   | 16.9  | 16.4  | 14.7  | 14.7  | 14.7  | 14.9  | 15.3  | 15.5  | 14.8  | 17.7  | 17.3  | 15.3  |
| Ptch1   | 1.2   | 1.4   | 1.7   | 1.3   | 1.2   | 1.3   | 1.3   | 1.3   | 1.2   | 1.4   | 1.0   | 1.0   |
| Ptch2   | 0.0   | 0.1   | 0.1   | 0.0   | 0.0   | 0.0   | 0.0   | 0.1   | 0.1   | 0.0   | 0.0   | 0.0   |
| Ptchd1  | 0.1   | 0.0   | 0.0   | 0.7   | 1.0   | 0.1   | 0.1   | 0.1   | 0.0   | 0.1   | 0.0   | 0.1   |
| Ptchd2  | 0.0   | 0.0   | 0.0   | 0.0   | 0.0   | 0.0   | 0.0   | 0.0   | 0.0   | 0.0   | 0.0   | 0.0   |
| Ptchd4  | 0.4   | 0.2   | 0.2   | 0.3   | 0.2   | 0.2   | 0.1   | 0.1   | 0.1   | 0.2   | 0.1   | 0.2   |
| Ptcra   | 0.0   | 0.1   | 0.1   | 0.2   | 0.0   | 0.0   | 0.1   | 0.0   | 0.0   | 0.0   | 0.0   | 0.0   |
| Ptdss1  | 27.1  | 22.8  | 19.7  | 26.7  | 21.2  | 25.3  | 22.2  | 20.9  | 21.2  | 21.4  | 22.8  | 23.4  |
| Ptdss2  | 6.3   | 7.5   | 7.9   | 5.3   | 7.2   | 8.2   | 7.4   | 8.7   | 7.8   | 9.0   | 7.4   | 8.5   |
| Pten    | 23.0  | 25.0  | 26.6  | 24.4  | 23.7  | 24.8  | 20.4  | 24.5  | 22.3  | 24.6  | 25.1  | 26.7  |
| Pter    | 7.6   | 6.1   | 5.1   | 6.8   | 4.5   | 5.9   | 5.7   | 5.4   | 5.0   | 5.9   | 7.0   | 6.3   |
| Ptgds   | 0.0   | 0.3   | 0.0   | 0.4   | 0.0   | 0.0   | 0.0   | 0.1   | 0.2   | 0.1   | 0.0   | 0.1   |
| Ptger1  | 8.1   | 4.5   | 2.9   | 7.4   | 6.6   | 6.3   | 6.1   | 5.5   | 5.6   | 5.7   | 5.5   | 5.5   |
| Ptger2  | 0.1   | 0.0   | 0.0   | 0.4   | 1.1   | 0.1   | 0.1   | 0.0   | 0.0   | 0.3   | 0.1   | 0.2   |
| Ptger3  | 0.1   | 0.1   | 0.0   | 0.0   | 0.0   | 0.0   | 0.0   | 0.0   | 0.0   | 0.0   | 0.0   | 0.0   |
| Ptger4  | 3.2   | 6.8   | 10.0  | 3.2   | 9.0   | 3.2   | 9.6   | 10.7  | 9.2   | 9.3   | 8.8   | 8.6   |
| Ptges   | 1.4   | 1.8   | 2.3   | 1.2   | 1.1   | 1.2   | 1.1   | 1.3   | 0.9   | 2.3   | 1.9   | 2.1   |
| Ptges2  | 7.7   | 7.3   | 6.0   | 6.5   | 6.0   | 5.6   | 6.5   | 7.6   | 6.7   | 7.1   | 6.2   | 6.4   |
| Ptges3  | 83.1  | 85.2  | 79.9  | 94.2  | 87.9  | 96.2  | 80.2  | 77.6  | 80.2  | 97.1  | 95.8  | 95.9  |
| Ptges3l | 5.9   | 4.5   | 4.1   | 4.8   | 5.0   | 5.6   | 5.4   | 4.1   | 5.2   | 5.9   | 6.1   | 5.4   |
| Ptgrfr  | 0.0   | 0.1   | 0.3   | 0.0   | 0.1   | 0.0   | 0.0   | 0.3   | 0.1   | 0.2   | 0.2   | 0.1   |
| Ptgrfn  | 27.3  | 27.9  | 33.2  | 25.4  | 29.8  | 29.3  | 30.1  | 29.5  | 27.4  | 25.1  | 24.9  | 27.9  |
| Ptgir   | 3.0   | 5.1   | 6.0   | 7.5   | 8.2   | 4.3   | 4.0   | 4.6   | 3.1   | 2.5   | 2.0   | 2.3   |
| Ptgis   | 148.9 | 147.3 | 125.5 | 69.7  | 102.2 | 94.9  | 114.7 | 184.1 | 124.7 | 162.2 | 135.4 | 127.9 |
| Ptgr1   | 24.6  | 25.4  | 22.9  | 22.4  | 24.2  | 26.4  | 17.8  | 19.1  | 20.0  | 18.6  | 19.0  | 18.8  |
| Ptgr2   | 22.1  | 20.5  | 20.3  | 23.7  | 19.5  | 24.4  | 18.8  | 17.6  | 16.9  | 21.3  | 21.1  | 22.5  |
| Ptgs1   | 7.5   | 4.3   | 3.9   | 5.4   | 6.0   | 3.1   | 3.9   | 4.1   | 4.2   | 23.2  | 12.1  | 7.9   |
| Ptgs2   | 9.5   | 3.2   | 2.0   | 7.5   | 9.5   | 4.8   | 7.6   | 1.8   | 4.1   | 15.0  | 12.3  | 8.4   |
| Pth1r   | 0.6   | 3.1   | 6.2   | 0.4   | 1.2   | 1.1   | 3.1   | 5.4   | 4.4   | 1.7   | 2.8   | 3.4   |
| Pth2r   | 0.0   | 0.0   | 0.0   | 0.0   | 0.0   | 0.0   | 0.0   | 0.0   | 0.0   | 0.0   | 0.0   | 0.0   |
| Pthlh   | 0.0   | 0.0   | 0.0   | 0.1   | 0.0   | 0.0   | 0.0   | 0.0   | 0.0   | 0.0   | 0.0   | 0.0   |
| Ptk2    | 23.9  | 19.3  | 16.1  | 20.1  | 18.4  | 21.2  | 19.7  | 17.1  | 18.5  | 18.9  | 20.9  | 19.7  |
| Ptk2b   | 17.9  | 17.5  | 13.1  | 22.3  | 25.2  | 19.0  | 17.0  | 11.3  | 14.3  | 29.8  | 21.7  | 17.3  |
| Ptk7    | 27.6  | 37.6  | 38.5  | 21.4  | 33.2  | 28.2  | 42.7  | 33.8  | 42.4  | 43.3  | 32.2  | 32.2  |
| Ptma    | 208.7 | 170.6 | 266.6 | 292.0 | 250.1 | 265.1 | 227.4 | 233.4 | 169.2 | 278.9 | 270.6 | 272.4 |
| Ptms    | 60.8  | 69.1  | 100.4 | 73.9  | 69.2  | 64.1  | 115.1 | 118.6 | 100.9 | 82.8  | 111.8 | 104.1 |
| Ptn     | 0.5   | 0.9   | 2.2   | 0.1   | 0.6   | 0.2   | 1.1   | 7.0   | 5.4   | 1.4   | 3.5   | 3.2   |
| Ptov1   | 16.7  | 19.5  | 19.2  | 15.2  | 15.9  | 16.8  | 18.0  | 21.7  | 22.5  | 19.8  | 19.1  | 17.1  |
| Ptp4a1  | 6.9   | 6.4   | 6.0   | 6.4   | 6.4   | 7.5   | 6.4   | 5.7   | 4.6   | 6.7   | 7.2   | 6.1   |
| Ptp4a2  | 84.5  | 68.9  | 60.5  | 89.9  | 76.0  | 84.1  | 67.9  | 63.8  | 67.2  | 73.4  | 83.0  | 71.3  |
| Ptp4a3  | 7.0   | 6.1   | 5.7   | 7.5   | 5.8   | 8.5   | 4.8   | 4.1   | 4.9   | 6.0   | 4.7   | 4.3   |
| Ptpdc1  | 4.9   | 5.4   | 5.5   | 4.6   | 4.5   | 6.7   | 4.9   | 4.3   | 4.6   | 3.9   | 4.7   | 4.6   |
| Ptpla   | 22.5  | 13.6  | 13.7  | 20.9  | 17.6  | 17.1  | 24.5  | 22.8  | 25.2  | 26.4  | 26.0  | 21.5  |
| Ptplad1 | 24.1  | 20.3  | 19.0  | 21.6  | 20.0  | 19.8  | 18.7  | 17.7  | 18.0  | 29.7  | 23.7  | 22.1  |

Online Table 1

|         |       |       |       |       |       |       |       |       |       |       |       |       |
|---------|-------|-------|-------|-------|-------|-------|-------|-------|-------|-------|-------|-------|
| Ptplad2 | 21.8  | 16.2  | 16.0  | 12.7  | 15.1  | 13.8  | 15.9  | 13.3  | 16.5  | 22.9  | 23.0  | 22.2  |
| Ptplb   | 2.0   | 2.1   | 2.5   | 2.8   | 3.3   | 2.0   | 2.8   | 2.9   | 3.0   | 3.8   | 3.0   | 3.5   |
| Ptpm1   | 20.5  | 15.5  | 13.4  | 20.4  | 15.2  | 17.8  | 15.7  | 14.5  | 15.9  | 15.2  | 16.8  | 15.6  |
| Ptpn1   | 6.6   | 7.6   | 9.6   | 8.0   | 11.7  | 5.1   | 8.2   | 9.9   | 9.1   | 9.0   | 7.2   | 9.0   |
| Ptpn11  | 80.0  | 61.3  | 48.2  | 91.6  | 63.9  | 81.2  | 64.5  | 42.3  | 51.7  | 57.0  | 60.6  | 60.4  |
| Ptpn12  | 11.7  | 11.7  | 13.4  | 13.0  | 15.8  | 9.0   | 14.4  | 14.8  | 12.7  | 12.1  | 15.7  | 15.0  |
| Ptpn13  | 2.5   | 3.0   | 3.2   | 1.8   | 2.0   | 1.8   | 2.5   | 3.4   | 3.5   | 26.0  | 13.4  | 6.7   |
| Ptpn14  | 7.0   | 6.3   | 7.0   | 4.4   | 5.2   | 5.4   | 5.9   | 5.7   | 5.2   | 9.6   | 7.2   | 7.1   |
| Ptpn18  | 0.2   | 0.0   | 0.1   | 2.1   | 2.8   | 0.0   | 0.3   | 0.0   | 0.1   | 0.2   | 0.1   | 0.1   |
| Ptpn2   | 12.5  | 12.1  | 15.2  | 14.7  | 13.9  | 11.9  | 17.1  | 12.2  | 12.3  | 13.8  | 15.5  | 16.9  |
| Ptpn21  | 4.9   | 4.8   | 4.4   | 6.7   | 3.9   | 6.3   | 5.9   | 4.3   | 4.3   | 4.3   | 4.9   | 5.0   |
| Ptpn22  | 0.1   | 0.1   | 0.0   | 0.7   | 1.6   | 0.1   | 0.2   | 0.0   | 0.0   | 0.1   | 0.0   | 0.1   |
| Ptpn23  | 3.1   | 3.5   | 3.5   | 3.2   | 3.7   | 3.8   | 4.3   | 3.0   | 3.3   | 3.1   | 3.0   | 2.7   |
| Ptpn3   | 1.2   | 1.0   | 1.1   | 1.0   | 0.9   | 1.4   | 0.9   | 0.8   | 0.7   | 1.5   | 1.2   | 1.1   |
| Ptpn4   | 2.0   | 1.7   | 1.3   | 1.8   | 1.6   | 1.8   | 1.4   | 1.5   | 1.2   | 1.9   | 1.6   | 1.7   |
| Ptpn5   | 0.0   | 0.0   | 0.0   | 0.0   | 0.0   | 0.0   | 0.0   | 0.0   | 0.0   | 0.0   | 0.0   | 0.0   |
| Ptpn6   | 2.6   | 0.4   | 0.4   | 19.0  | 32.2  | 0.3   | 5.2   | 0.6   | 0.9   | 2.1   | 1.4   | 2.2   |
| Ptpn7   | 0.4   | 0.1   | 0.1   | 4.3   | 5.8   | 0.0   | 0.7   | 0.1   | 0.1   | 0.5   | 0.2   | 0.5   |
| Ptpn9   | 25.5  | 26.0  | 23.9  | 21.7  | 24.1  | 23.2  | 27.4  | 22.8  | 26.8  | 30.4  | 25.1  | 26.7  |
| Ptpra   | 41.9  | 42.5  | 45.9  | 57.0  | 48.3  | 47.8  | 55.9  | 45.4  | 45.9  | 44.4  | 49.4  | 54.9  |
| Ptprb   | 4.0   | 2.0   | 3.7   | 4.0   | 4.9   | 4.1   | 6.2   | 7.5   | 5.7   | 4.0   | 5.1   | 4.2   |
| Ptprc   | 1.2   | 0.1   | 0.1   | 10.3  | 17.4  | 0.0   | 2.2   | 0.3   | 0.4   | 1.2   | 0.4   | 1.0   |
| Ptprcap | 0.1   | 0.2   | 0.1   | 0.1   | 0.2   | 0.1   | 0.3   | 0.1   | 0.5   | 0.0   | 0.2   | 0.3   |
| Ptprd   | 1.9   | 2.2   | 3.1   | 1.8   | 1.7   | 1.8   | 2.4   | 3.2   | 3.3   | 6.3   | 4.6   | 3.9   |
| Ptpre   | 0.8   | 0.1   | 0.2   | 3.1   | 4.2   | 0.4   | 0.9   | 0.3   | 0.3   | 0.4   | 0.4   | 0.4   |
| Ptprf   | 16.2  | 18.8  | 18.8  | 7.3   | 13.5  | 9.6   | 21.0  | 17.5  | 20.8  | 18.3  | 16.8  | 14.0  |
| Ptprg   | 11.8  | 10.6  | 10.5  | 11.4  | 10.5  | 11.3  | 12.2  | 8.5   | 9.8   | 10.5  | 10.0  | 10.3  |
| Ptpnj   | 8.8   | 8.1   | 7.7   | 13.6  | 17.1  | 7.7   | 10.4  | 6.4   | 7.4   | 7.8   | 7.4   | 8.4   |
| Ptpnk   | 6.1   | 2.5   | 2.0   | 3.1   | 1.9   | 1.7   | 2.7   | 1.9   | 2.5   | 4.3   | 4.9   | 3.5   |
| Ptpnm   | 13.1  | 12.2  | 11.7  | 16.0  | 10.5  | 16.2  | 15.1  | 14.1  | 14.7  | 10.4  | 11.4  | 12.6  |
| Ptpnn   | 2.1   | 2.6   | 3.0   | 2.7   | 5.2   | 2.8   | 3.9   | 5.4   | 3.0   | 3.4   | 2.2   | 2.1   |
| Ptpn2   | 0.1   | 0.1   | 0.0   | 0.0   | 0.0   | 0.1   | 0.1   | 0.0   | 0.0   | 0.0   | 0.0   | 0.0   |
| Ptpno   | 0.1   | 0.0   | 0.0   | 1.4   | 1.9   | 0.0   | 0.2   | 0.0   | 0.0   | 0.1   | 0.1   | 0.1   |
| Ptpnq   | 8.2   | 2.4   | 1.2   | 5.2   | 1.1   | 2.3   | 1.0   | 0.5   | 0.8   | 6.6   | 4.2   | 2.1   |
| Ptpnr   | 17.7  | 18.7  | 19.8  | 18.7  | 19.3  | 24.3  | 18.8  | 18.0  | 18.0  | 23.6  | 19.3  | 18.5  |
| Ptpnt   | 0.1   | 0.0   | 0.0   | 0.0   | 0.0   | 0.0   | 0.0   | 0.0   | 0.0   | 0.0   | 0.0   | 0.0   |
| Ptpnu   | 0.6   | 0.7   | 0.8   | 0.3   | 0.5   | 0.5   | 0.9   | 0.5   | 0.6   | 0.3   | 0.4   | 0.4   |
| Ptpnv   | 0.1   | 0.2   | 0.2   | 0.1   | 0.3   | 0.1   | 0.1   | 0.1   | 0.3   | 0.7   | 0.2   | 0.2   |
| Ptpnz1  | 1.2   | 0.1   | 0.1   | 1.4   | 0.1   | 0.7   | 0.1   | 0.1   | 0.0   | 0.2   | 0.3   | 0.1   |
| Ptrf    | 135.3 | 118.7 | 110.1 | 114.0 | 95.9  | 122.2 | 126.1 | 130.2 | 110.6 | 131.2 | 150.2 | 127.9 |
| Ptrh1   | 31.2  | 18.0  | 12.2  | 21.0  | 20.3  | 24.7  | 22.0  | 15.0  | 19.1  | 21.0  | 18.0  | 20.7  |
| Ptrh2   | 4.6   | 5.1   | 3.9   | 4.4   | 4.4   | 4.1   | 4.7   | 5.2   | 5.1   | 5.5   | 4.7   | 4.6   |
| Ptrhd1  | 1.5   | 1.3   | 1.0   | 1.8   | 1.8   | 1.7   | 1.5   | 1.5   | 1.7   | 1.4   | 1.5   | 1.5   |
| Pts     | 19.5  | 17.1  | 15.8  | 13.8  | 16.4  | 14.3  | 20.5  | 19.2  | 17.1  | 17.0  | 21.7  | 19.5  |
| Pttg1   | 37.5  | 34.7  | 33.2  | 34.4  | 25.9  | 39.0  | 25.1  | 25.3  | 25.1  | 23.1  | 25.0  | 28.3  |
| Pttg1ip | 64.8  | 62.4  | 58.2  | 78.3  | 60.0  | 73.8  | 67.4  | 72.7  | 75.9  | 64.5  | 67.9  | 67.1  |
| Ptx3    | 206.3 | 175.3 | 204.9 | 172.6 | 239.7 | 84.5  | 226.8 | 145.4 | 143.1 | 124.2 | 138.6 | 139.0 |
| Puf60   | 46.6  | 47.3  | 40.6  | 47.4  | 42.0  | 40.8  | 49.2  | 48.6  | 48.1  | 49.4  | 49.3  | 46.5  |
| Pum1    | 9.3   | 12.4  | 12.5  | 10.1  | 10.1  | 10.7  | 11.3  | 10.7  | 11.1  | 10.8  | 11.2  | 10.6  |
| Pum2    | 13.2  | 14.6  | 15.5  | 13.1  | 14.7  | 13.1  | 13.8  | 13.1  | 13.7  | 14.0  | 14.7  | 15.6  |
| Pura    | 12.6  | 10.4  | 9.9   | 13.1  | 9.5   | 12.1  | 11.6  | 9.5   | 9.4   | 10.0  | 9.0   | 10.3  |
| Purb    | 8.2   | 8.3   | 8.0   | 7.7   | 8.0   | 7.3   | 7.3   | 7.0   | 7.6   | 8.8   | 9.1   | 8.5   |
| Purg    | 2.8   | 2.9   | 3.0   | 4.1   | 2.3   | 4.4   | 3.0   | 2.8   | 2.9   | 3.4   | 2.3   | 2.7   |
| Pus1    | 9.0   | 8.1   | 6.8   | 8.9   | 9.0   | 7.7   | 8.6   | 7.4   | 8.1   | 8.5   | 8.7   | 7.0   |
| Pus10   | 4.5   | 4.0   | 4.0   | 3.7   | 3.9   | 4.0   | 3.3   | 4.3   | 3.8   | 3.6   | 3.8   | 4.1   |
| Pus3    | 4.8   | 4.5   | 3.2   | 5.3   | 4.1   | 4.9   | 4.1   | 4.0   | 3.8   | 4.1   | 4.1   | 3.9   |
| Pus7    | 11.6  | 10.1  | 8.4   | 10.3  | 9.3   | 11.2  | 9.7   | 8.4   | 9.2   | 10.9  | 10.7  | 10.9  |

Online Table 1

|         |      |      |      |      |      |      |      |      |      |      |      |      |
|---------|------|------|------|------|------|------|------|------|------|------|------|------|
| Pus7l   | 1.5  | 1.3  | 1.4  | 1.1  | 1.5  | 0.8  | 1.4  | 1.8  | 1.3  | 1.8  | 1.3  | 1.2  |
| Pusl1   | 10.2 | 7.9  | 6.5  | 13.3 | 9.8  | 12.2 | 11.0 | 7.8  | 9.7  | 8.8  | 9.7  | 9.0  |
| Pvalb   | 0.0  | 0.0  | 0.2  | 0.1  | 0.1  | 0.4  | 0.1  | 0.4  | 0.0  | 0.0  | 0.1  | 0.0  |
| Pvr     | 10.2 | 8.9  | 7.7  | 9.8  | 9.3  | 8.4  | 11.5 | 8.5  | 7.6  | 8.9  | 12.1 | 8.2  |
| Pvr1    | 1.6  | 1.9  | 1.9  | 1.5  | 2.1  | 2.1  | 2.8  | 1.8  | 1.9  | 1.6  | 1.5  | 1.3  |
| Pvr12   | 12.8 | 13.7 | 17.3 | 8.9  | 14.4 | 8.4  | 19.2 | 16.7 | 20.3 | 28.9 | 17.9 | 18.2 |
| Pvr13   | 12.6 | 12.0 | 11.7 | 8.6  | 11.8 | 11.1 | 15.7 | 13.6 | 15.7 | 12.0 | 15.7 | 14.3 |
| Pvr14   | 0.1  | 0.0  | 0.1  | 0.2  | 0.1  | 0.0  | 0.0  | 0.0  | 0.0  | 0.1  | 0.1  | 0.0  |
| Pvt1    | 6.9  | 6.3  | 5.1  | 6.9  | 5.2  | 7.8  | 5.2  | 4.7  | 4.7  | 6.0  | 4.8  | 4.4  |
| Pwp1    | 10.5 | 9.2  | 8.9  | 10.7 | 9.8  | 10.0 | 9.5  | 8.8  | 8.2  | 9.5  | 10.0 | 9.2  |
| Pwp2    | 6.3  | 5.2  | 3.4  | 6.6  | 6.2  | 6.7  | 5.7  | 3.9  | 4.8  | 5.3  | 4.2  | 4.4  |
| Pwwp2a  | 1.6  | 2.2  | 2.6  | 1.6  | 2.4  | 1.5  | 2.0  | 2.4  | 2.1  | 2.1  | 2.2  | 2.1  |
| Pwwp2b  | 4.6  | 4.6  | 3.9  | 4.7  | 4.0  | 5.9  | 3.1  | 2.1  | 2.1  | 3.1  | 3.3  | 2.8  |
| Pxdc1   | 36.7 | 33.4 | 20.3 | 29.8 | 27.2 | 29.7 | 26.8 | 21.7 | 24.0 | 17.5 | 28.2 | 15.4 |
| Pxdn    | 12.1 | 11.8 | 15.1 | 8.3  | 13.1 | 8.8  | 14.6 | 26.3 | 20.2 | 16.8 | 14.2 | 13.6 |
| Pxk     | 10.2 | 11.7 | 11.5 | 10.4 | 9.8  | 9.2  | 11.5 | 9.3  | 10.8 | 14.7 | 13.0 | 10.9 |
| Pxmp2   | 0.6  | 0.8  | 0.7  | 0.9  | 0.5  | 0.4  | 0.7  | 0.6  | 0.8  | 0.8  | 0.9  | 0.4  |
| Pxmp4   | 9.8  | 9.2  | 9.6  | 9.8  | 7.8  | 8.9  | 8.9  | 9.9  | 9.6  | 8.7  | 10.2 | 10.6 |
| Pxn     | 14.8 | 16.9 | 16.2 | 12.6 | 16.1 | 13.8 | 15.4 | 19.4 | 16.6 | 15.9 | 16.7 | 13.9 |
| Pycard  | 1.8  | 1.4  | 0.8  | 1.9  | 3.8  | 1.7  | 1.1  | 1.0  | 1.3  | 1.4  | 0.7  | 0.8  |
| Pycr1   | 5.0  | 3.5  | 3.5  | 4.4  | 3.1  | 5.0  | 3.4  | 4.4  | 3.5  | 2.7  | 3.7  | 2.9  |
| Pycr2   | 15.8 | 12.2 | 8.5  | 11.9 | 13.6 | 11.6 | 13.4 | 12.2 | 13.7 | 16.6 | 12.3 | 11.0 |
| Pycr1   | 9.3  | 9.0  | 6.9  | 10.8 | 8.5  | 10.1 | 9.2  | 8.4  | 9.7  | 10.5 | 9.5  | 8.8  |
| Pydc3   | 0.0  | 0.0  | 0.0  | 0.2  | 0.0  | 0.0  | 0.0  | 0.0  | 0.0  | 0.0  | 0.0  | 0.0  |
| Pygb    | 15.9 | 15.8 | 20.4 | 15.7 | 15.0 | 16.1 | 16.3 | 21.7 | 18.4 | 21.5 | 20.5 | 18.7 |
| Pygl    | 9.4  | 15.8 | 15.3 | 10.6 | 15.3 | 13.6 | 7.7  | 6.1  | 7.0  | 12.6 | 9.4  | 11.3 |
| Pygm    | 2.0  | 2.9  | 3.5  | 1.9  | 1.6  | 1.9  | 0.9  | 0.4  | 0.6  | 0.5  | 0.4  | 0.5  |
| Pygo1   | 4.8  | 4.4  | 4.8  | 5.1  | 3.0  | 5.9  | 3.9  | 3.5  | 2.8  | 3.3  | 3.4  | 4.5  |
| Pygo2   | 11.1 | 13.1 | 10.2 | 9.4  | 11.3 | 10.2 | 11.7 | 10.7 | 12.7 | 12.6 | 10.4 | 9.9  |
| Pyhin1  | 0.1  | 0.0  | 0.0  | 0.2  | 0.2  | 0.1  | 0.1  | 0.0  | 0.0  | 0.0  | 0.1  | 0.0  |
| Pyroxd1 | 3.5  | 2.6  | 2.5  | 3.5  | 2.7  | 2.3  | 2.3  | 2.8  | 2.7  | 2.7  | 3.0  | 3.2  |
| Pyroxd2 | 1.8  | 2.1  | 2.2  | 1.1  | 1.0  | 1.4  | 1.4  | 1.9  | 2.1  | 1.9  | 1.3  | 1.5  |
| Pyurf   | 1.6  | 1.4  | 1.5  | 2.4  | 1.5  | 1.9  | 1.5  | 1.8  | 1.1  | 1.9  | 1.8  | 1.6  |
| Qars    | 28.4 | 26.9 | 27.6 | 23.6 | 27.5 | 27.4 | 25.0 | 29.5 | 27.4 | 29.6 | 29.1 | 27.8 |
| Qdpr    | 16.7 | 15.6 | 14.7 | 15.9 | 16.9 | 16.0 | 12.5 | 14.7 | 13.1 | 14.6 | 12.6 | 13.0 |
| Qk      | 25.8 | 27.1 | 29.8 | 38.7 | 26.8 | 33.0 | 29.7 | 26.0 | 23.0 | 24.2 | 32.7 | 28.7 |
| Qpct    | 12.4 | 14.0 | 10.5 | 13.4 | 10.7 | 12.7 | 8.0  | 7.2  | 7.9  | 7.2  | 8.4  | 7.5  |
| Qpctl   | 6.0  | 5.6  | 5.8  | 6.0  | 7.1  | 5.6  | 7.4  | 7.6  | 6.6  | 6.9  | 6.8  | 6.8  |
| Qrfp    | 0.0  | 0.1  | 0.0  | 0.0  | 0.1  | 0.0  | 0.1  | 0.1  | 0.0  | 0.1  | 0.1  | 0.1  |
| Qrich1  | 28.2 | 30.6 | 31.6 | 33.4 | 28.4 | 31.6 | 33.5 | 36.2 | 31.4 | 29.3 | 34.6 | 31.2 |
| Qrich2  | 0.0  | 0.0  | 0.0  | 0.0  | 0.0  | 0.2  | 0.0  | 0.0  | 0.0  | 0.1  | 0.0  | 0.0  |
| Qrsl1   | 3.5  | 3.0  | 2.8  | 3.0  | 2.9  | 2.8  | 3.1  | 2.4  | 2.4  | 2.8  | 3.1  | 2.5  |
| Qser1   | 2.3  | 2.6  | 2.3  | 2.8  | 2.2  | 2.7  | 2.4  | 1.8  | 1.9  | 2.2  | 2.5  | 2.1  |
| Qsox1   | 55.0 | 44.7 | 42.6 | 48.3 | 48.3 | 53.0 | 45.3 | 44.0 | 47.0 | 50.7 | 45.1 | 48.1 |
| Qsox2   | 6.8  | 6.1  | 6.0  | 7.0  | 5.8  | 7.3  | 6.6  | 7.2  | 7.7  | 5.5  | 6.8  | 5.4  |
| Qtrt1   | 5.3  | 4.0  | 4.1  | 5.0  | 4.4  | 4.3  | 4.3  | 4.8  | 3.9  | 5.3  | 5.1  | 4.0  |
| Qtrtd1  | 2.5  | 2.4  | 2.4  | 2.6  | 2.6  | 2.3  | 2.2  | 2.6  | 2.3  | 2.2  | 3.0  | 2.4  |
| R3hcc1  | 13.4 | 10.7 | 9.3  | 18.7 | 9.3  | 16.4 | 13.3 | 10.9 | 9.3  | 10.9 | 13.8 | 13.5 |
| R3hcc1l | 5.9  | 6.3  | 6.2  | 5.9  | 6.0  | 5.1  | 6.0  | 6.1  | 6.3  | 5.7  | 6.3  | 6.8  |
| R3hdm1  | 3.1  | 3.7  | 4.2  | 4.1  | 3.9  | 3.8  | 3.8  | 4.1  | 3.2  | 3.3  | 4.4  | 3.6  |
| R3hdm2  | 4.6  | 5.6  | 5.9  | 6.0  | 4.5  | 5.3  | 5.9  | 5.1  | 4.2  | 3.5  | 4.8  | 4.7  |
| R3hdm4  | 14.9 | 13.7 | 13.6 | 15.3 | 15.0 | 15.7 | 15.6 | 15.7 | 13.8 | 13.6 | 13.3 | 12.2 |
| R74862  | 2.9  | 2.1  | 1.5  | 2.5  | 1.7  | 1.8  | 1.6  | 1.7  | 1.9  | 2.7  | 2.3  | 1.8  |
| Rab1    | 61.0 | 58.5 | 60.6 | 70.5 | 70.2 | 65.9 | 67.6 | 67.5 | 63.9 | 65.4 | 75.4 | 75.6 |
| Rab10   | 33.9 | 31.1 | 34.9 | 44.1 | 37.8 | 34.1 | 39.0 | 35.8 | 36.9 | 36.6 | 43.2 | 40.4 |
| Rab11a  | 34.8 | 31.2 | 26.9 | 35.9 | 33.7 | 31.8 | 30.7 | 33.3 | 30.8 | 37.3 | 40.9 | 34.6 |
| Rab11b  | 9.4  | 9.5  | 9.6  | 11.4 | 11.0 | 9.3  | 11.3 | 11.3 | 9.9  | 11.3 | 10.4 | 9.7  |

Online Table 1

|           |       |       |       |       |       |       |       |       |       |       |       |       |
|-----------|-------|-------|-------|-------|-------|-------|-------|-------|-------|-------|-------|-------|
| Rab11fip1 | 1.1   | 0.7   | 0.6   | 1.0   | 0.8   | 0.9   | 0.5   | 0.4   | 0.4   | 1.5   | 0.9   | 0.8   |
| Rab11fip2 | 4.1   | 4.3   | 5.0   | 3.1   | 3.3   | 3.9   | 4.3   | 4.6   | 4.9   | 4.9   | 5.3   | 4.7   |
| Rab11fip3 | 5.6   | 6.6   | 7.0   | 6.6   | 5.5   | 6.3   | 7.1   | 5.7   | 5.9   | 5.6   | 5.8   | 6.1   |
| Rab11fip4 | 0.0   | 0.2   | 0.0   | 0.0   | 0.0   | 0.0   | 0.0   | 0.0   | 0.0   | 0.0   | 0.0   | 0.0   |
| Rab11fip5 | 22.7  | 19.4  | 13.7  | 21.4  | 17.3  | 23.6  | 16.5  | 12.7  | 15.0  | 18.1  | 17.5  | 14.9  |
| Rab12     | 35.0  | 32.2  | 34.4  | 37.0  | 31.0  | 37.3  | 34.6  | 32.2  | 31.3  | 31.8  | 33.3  | 36.4  |
| Rab13     | 18.8  | 15.7  | 19.3  | 17.2  | 16.9  | 22.2  | 16.7  | 17.2  | 15.9  | 18.0  | 19.3  | 20.9  |
| Rab14     | 23.4  | 27.2  | 26.8  | 26.5  | 29.1  | 25.8  | 25.9  | 26.0  | 26.8  | 28.6  | 29.4  | 30.9  |
| Rab15     | 0.6   | 1.4   | 1.8   | 0.5   | 1.1   | 0.6   | 1.3   | 0.9   | 1.2   | 0.9   | 0.9   | 1.4   |
| Rab18     | 32.2  | 39.4  | 45.2  | 43.3  | 42.8  | 42.5  | 37.4  | 41.1  | 39.4  | 44.3  | 48.1  | 49.3  |
| Rab19     | 0.3   | 0.2   | 0.3   | 0.2   | 0.5   | 0.0   | 0.2   | 0.1   | 0.1   | 0.0   | 0.0   | 0.1   |
| Rab1b     | 37.5  | 33.5  | 28.4  | 43.7  | 41.4  | 32.4  | 38.2  | 36.7  | 35.1  | 35.4  | 36.4  | 31.5  |
| Rab20     | 2.6   | 2.6   | 3.2   | 3.9   | 4.9   | 2.7   | 4.1   | 2.7   | 4.0   | 6.7   | 2.9   | 5.3   |
| Rab21     | 30.9  | 32.2  | 30.9  | 36.6  | 33.4  | 36.2  | 36.0  | 29.8  | 32.8  | 34.8  | 38.2  | 40.4  |
| Rab22a    | 24.3  | 19.6  | 18.5  | 26.0  | 20.2  | 24.1  | 20.4  | 19.0  | 21.7  | 22.4  | 21.9  | 22.2  |
| Rab23     | 4.5   | 6.0   | 6.9   | 4.8   | 6.2   | 4.8   | 6.2   | 7.0   | 4.8   | 4.2   | 5.3   | 4.9   |
| Rab24     | 17.9  | 15.8  | 14.3  | 13.1  | 14.7  | 17.7  | 15.6  | 14.2  | 16.7  | 15.3  | 14.5  | 16.0  |
| Rab25     | 0.0   | 0.0   | 0.1   | 0.1   | 0.0   | 0.0   | 0.0   | 0.0   | 0.0   | 0.0   | 0.0   | 0.0   |
| Rab26     | 0.6   | 0.6   | 0.7   | 0.8   | 0.4   | 1.0   | 0.3   | 0.5   | 0.5   | 0.3   | 0.4   | 0.2   |
| Rab27a    | 0.3   | 0.2   | 0.5   | 0.3   | 0.3   | 0.3   | 0.4   | 0.4   | 0.4   | 0.9   | 0.5   | 0.5   |
| Rab27b    | 0.3   | 0.2   | 0.2   | 0.3   | 0.2   | 0.3   | 0.1   | 0.1   | 0.1   | 0.3   | 0.3   | 0.4   |
| Rab28     | 38.1  | 30.1  | 25.6  | 36.7  | 24.8  | 33.5  | 28.2  | 26.5  | 30.0  | 24.4  | 26.9  | 30.3  |
| Rab2a     | 76.4  | 74.4  | 83.7  | 90.3  | 72.1  | 78.0  | 83.7  | 78.2  | 76.2  | 84.7  | 97.0  | 99.0  |
| Rab2b     | 10.0  | 7.7   | 7.0   | 9.2   | 8.3   | 10.7  | 9.0   | 8.6   | 7.7   | 7.0   | 8.4   | 8.2   |
| Rab30     | 10.6  | 10.2  | 7.9   | 12.5  | 10.2  | 13.1  | 11.4  | 9.1   | 10.4  | 8.8   | 11.6  | 10.0  |
| Rab31     | 57.7  | 70.6  | 67.2  | 75.4  | 94.0  | 55.2  | 101.3 | 83.2  | 104.6 | 86.3  | 77.6  | 101.0 |
| Rab32     | 9.8   | 9.3   | 9.0   | 11.3  | 11.9  | 9.0   | 11.7  | 14.0  | 10.4  | 15.7  | 15.9  | 11.1  |
| Rab33a    | 0.1   | 0.0   | 0.1   | 0.1   | 0.0   | 0.0   | 0.3   | 0.2   | 0.0   | 0.0   | 0.0   | 0.0   |
| Rab33b    | 10.3  | 9.8   | 9.7   | 11.6  | 10.2  | 10.2  | 11.7  | 10.4  | 12.2  | 11.5  | 13.9  | 11.1  |
| Rab34     | 53.5  | 54.2  | 49.8  | 40.6  | 40.2  | 47.2  | 49.7  | 57.0  | 58.3  | 57.3  | 52.5  | 51.9  |
| Rab35     | 15.4  | 15.4  | 16.9  | 17.2  | 17.3  | 16.8  | 19.6  | 16.8  | 18.4  | 16.1  | 19.0  | 17.6  |
| Rab36     | 0.7   | 0.7   | 0.7   | 0.7   | 0.5   | 1.1   | 0.7   | 0.6   | 0.6   | 0.4   | 0.5   | 0.4   |
| Rab37     | 0.0   | 0.1   | 0.1   | 0.1   | 0.1   | 0.1   | 0.0   | 0.0   | 0.1   | 0.1   | 0.1   | 0.1   |
| Rab38     | 0.2   | 0.1   | 0.1   | 0.0   | 0.0   | 0.0   | 0.1   | 0.1   | 0.1   | 0.4   | 0.3   | 0.1   |
| Rab39     | 0.0   | 0.0   | 0.0   | 0.0   | 0.1   | 0.0   | 0.1   | 0.0   | 0.0   | 0.1   | 0.0   | 0.0   |
| Rab39b    | 0.3   | 0.3   | 0.5   | 0.5   | 0.2   | 0.3   | 0.5   | 0.8   | 0.6   | 0.3   | 0.6   | 0.6   |
| Rab3a     | 5.5   | 5.7   | 4.9   | 5.7   | 4.1   | 7.0   | 4.6   | 3.6   | 4.7   | 4.8   | 5.8   | 4.6   |
| Rab3b     | 0.1   | 0.1   | 0.0   | 0.3   | 0.1   | 0.2   | 0.0   | 0.0   | 0.1   | 0.2   | 0.1   | 0.1   |
| Rab3c     | 0.1   | 0.1   | 0.1   | 0.2   | 0.1   | 0.1   | 0.2   | 0.1   | 0.1   | 0.1   | 0.2   | 0.2   |
| Rab3d     | 7.1   | 6.2   | 6.8   | 6.8   | 5.4   | 7.6   | 3.5   | 5.3   | 3.3   | 4.6   | 4.8   | 3.7   |
| Rab3gap1  | 16.0  | 13.7  | 13.8  | 16.0  | 14.0  | 14.4  | 13.0  | 12.2  | 13.7  | 17.5  | 15.8  | 17.0  |
| Rab3gap2  | 13.1  | 11.3  | 9.4   | 14.6  | 13.5  | 13.0  | 11.9  | 9.8   | 10.8  | 11.9  | 12.7  | 11.8  |
| Rab3il1   | 4.2   | 7.0   | 7.1   | 9.7   | 7.8   | 5.8   | 4.8   | 8.4   | 6.2   | 2.5   | 4.2   | 4.0   |
| Rab3ip    | 21.1  | 20.6  | 16.9  | 25.4  | 18.5  | 26.4  | 20.0  | 14.9  | 14.5  | 13.8  | 17.0  | 14.4  |
| Rab40b    | 2.6   | 4.7   | 5.9   | 1.4   | 2.4   | 2.1   | 3.1   | 3.5   | 3.9   | 5.4   | 3.5   | 4.0   |
| Rab40c    | 4.1   | 3.4   | 3.4   | 3.3   | 4.3   | 3.5   | 3.0   | 3.2   | 3.3   | 4.5   | 3.3   | 3.7   |
| Rab42     | 1.3   | 1.6   | 1.2   | 1.2   | 1.5   | 0.9   | 1.0   | 1.2   | 0.9   | 1.3   | 1.0   | 0.7   |
| Rab43     | 10.0  | 8.7   | 8.1   | 13.1  | 9.8   | 12.2  | 9.2   | 7.9   | 8.1   | 9.1   | 9.0   | 8.8   |
| Rab44     | 0.0   | 0.0   | 0.0   | 0.0   | 0.0   | 0.0   | 0.0   | 0.0   | 0.0   | 0.0   | 0.0   | 0.0   |
| Rab4a     | 5.1   | 3.1   | 3.7   | 3.7   | 2.7   | 4.4   | 3.9   | 4.0   | 3.9   | 3.5   | 3.9   | 4.3   |
| Rab4b     | 17.9  | 18.8  | 18.1  | 18.6  | 19.6  | 16.9  | 21.6  | 23.9  | 22.4  | 18.4  | 18.2  | 20.2  |
| Rab5a     | 38.6  | 38.4  | 39.7  | 41.0  | 37.0  | 39.4  | 39.2  | 37.3  | 39.6  | 39.6  | 46.9  | 46.9  |
| Rab5b     | 44.8  | 45.8  | 43.3  | 53.2  | 40.5  | 51.0  | 46.4  | 41.8  | 41.8  | 40.4  | 45.0  | 45.0  |
| Rab5c     | 78.1  | 69.6  | 66.6  | 93.2  | 86.0  | 85.8  | 79.9  | 71.1  | 68.6  | 74.5  | 75.3  | 73.0  |
| Rab6a     | 29.9  | 26.6  | 26.5  | 33.4  | 26.3  | 30.4  | 31.2  | 28.1  | 29.8  | 30.5  | 34.0  | 33.0  |
| Rab6b     | 3.4   | 3.1   | 3.0   | 5.0   | 2.4   | 3.9   | 3.8   | 3.0   | 2.9   | 3.3   | 2.7   | 2.8   |
| Rab7      | 155.2 | 129.6 | 121.3 | 177.0 | 146.6 | 163.7 | 138.8 | 118.9 | 111.4 | 133.0 | 140.2 | 150.3 |

Online Table 1



|          |       |       |       |       |       |       |       |       |       |       |       |       |
|----------|-------|-------|-------|-------|-------|-------|-------|-------|-------|-------|-------|-------|
| Rab7I1   | 24.6  | 28.9  | 33.4  | 23.4  | 27.1  | 21.1  | 20.6  | 23.8  | 25.4  | 19.9  | 21.3  | 28.9  |
| Rab8a    | 33.7  | 30.3  | 36.0  | 43.0  | 33.1  | 35.9  | 40.7  | 37.3  | 32.0  | 31.7  | 38.2  | 40.2  |
| Rab8b    | 9.0   | 12.2  | 16.9  | 15.6  | 20.3  | 8.4   | 19.2  | 19.9  | 16.2  | 12.6  | 13.8  | 17.6  |
| Rab9     | 20.4  | 28.1  | 39.7  | 21.4  | 21.2  | 18.0  | 26.5  | 34.6  | 28.3  | 27.5  | 33.0  | 37.2  |
| Rabac1   | 134.1 | 106.2 | 76.4  | 129.8 | 102.2 | 125.2 | 103.3 | 90.0  | 118.0 | 111.2 | 91.8  | 89.2  |
| Rabep1   | 22.6  | 18.6  | 17.1  | 23.7  | 19.1  | 21.9  | 18.3  | 14.9  | 16.7  | 18.1  | 21.0  | 20.8  |
| Rabep2   | 7.0   | 6.8   | 7.2   | 6.0   | 6.6   | 6.1   | 6.6   | 8.1   | 8.2   | 7.4   | 7.2   | 6.4   |
| Rabepk   | 8.5   | 7.7   | 8.1   | 7.9   | 6.7   | 8.4   | 8.2   | 8.0   | 7.1   | 7.7   | 8.0   | 7.3   |
| Rabgap1  | 23.6  | 23.6  | 23.0  | 21.2  | 22.0  | 22.2  | 24.1  | 21.3  | 21.4  | 23.2  | 25.0  | 25.6  |
| Rabgap1I | 13.0  | 11.7  | 12.6  | 11.5  | 9.1   | 12.7  | 11.6  | 9.3   | 10.8  | 11.9  | 13.2  | 14.0  |
| Rabgef1  | 12.3  | 12.7  | 10.1  | 12.5  | 12.0  | 13.1  | 12.9  | 9.5   | 10.7  | 11.2  | 11.6  | 11.1  |
| Rabggta  | 4.4   | 3.7   | 2.5   | 5.1   | 3.8   | 4.2   | 4.1   | 2.8   | 4.0   | 3.8   | 3.6   | 3.1   |
| Rabggtb  | 39.4  | 32.6  | 31.2  | 34.2  | 30.5  | 36.7  | 31.1  | 28.0  | 29.3  | 31.6  | 31.8  | 33.6  |
| Rabif    | 10.6  | 10.6  | 9.0   | 11.0  | 11.1  | 10.5  | 10.1  | 11.6  | 11.6  | 13.3  | 11.8  | 11.6  |
| Rabl2    | 2.3   | 2.6   | 2.5   | 1.7   | 2.3   | 2.6   | 2.9   | 3.1   | 2.7   | 2.5   | 2.5   | 2.5   |
| Rabl3    | 2.3   | 2.3   | 2.8   | 2.8   | 2.8   | 1.9   | 2.0   | 2.6   | 2.7   | 2.4   | 2.4   | 2.1   |
| Rabl5    | 14.7  | 13.0  | 10.7  | 18.1  | 12.2  | 15.4  | 10.2  | 11.3  | 9.2   | 10.5  | 11.3  | 11.5  |
| Rabl6    | 19.6  | 20.0  | 22.9  | 20.2  | 17.6  | 20.1  | 19.2  | 21.7  | 18.0  | 19.8  | 22.3  | 22.6  |
| Rac1     | 106.8 | 104.8 | 106.3 | 121.3 | 116.0 | 112.8 | 121.3 | 123.6 | 120.4 | 111.5 | 133.2 | 120.7 |
| Rac2     | 1.3   | 0.0   | 0.1   | 11.1  | 21.9  | 0.0   | 3.6   | 0.2   | 0.7   | 1.6   | 0.4   | 1.2   |
| Rac3     | 2.1   | 3.0   | 2.6   | 4.0   | 2.4   | 5.0   | 2.1   | 1.7   | 2.3   | 3.2   | 2.5   | 2.1   |
| Racgap1  | 2.9   | 6.1   | 9.1   | 1.9   | 7.6   | 1.9   | 10.7  | 4.6   | 7.4   | 4.6   | 8.1   | 4.9   |
| Rad1     | 6.7   | 7.0   | 5.9   | 5.9   | 6.0   | 6.1   | 5.9   | 5.2   | 6.3   | 6.2   | 6.2   | 6.8   |
| Rad17    | 10.9  | 12.9  | 13.1  | 12.7  | 11.3  | 12.2  | 11.6  | 11.0  | 12.2  | 12.1  | 12.6  | 13.5  |
| Rad18    | 2.9   | 4.3   | 5.6   | 2.1   | 4.1   | 2.6   | 3.9   | 3.9   | 3.7   | 2.9   | 3.6   | 4.0   |
| Rad21    | 12.9  | 14.3  | 19.2  | 13.0  | 16.2  | 13.1  | 19.4  | 15.0  | 16.3  | 15.5  | 17.5  | 17.8  |
| Rad23a   | 20.7  | 21.3  | 21.5  | 22.0  | 21.1  | 23.8  | 21.6  | 22.6  | 23.6  | 21.8  | 21.4  | 21.1  |
| Rad23b   | 59.7  | 60.2  | 64.5  | 72.2  | 53.9  | 63.9  | 65.1  | 69.2  | 62.8  | 69.6  | 74.5  | 75.2  |
| Rad50    | 12.9  | 12.0  | 14.6  | 15.4  | 12.5  | 13.2  | 13.7  | 11.8  | 9.8   | 9.6   | 13.0  | 13.0  |
| Rad51    | 1.3   | 3.0   | 4.5   | 0.9   | 4.2   | 0.7   | 5.3   | 2.1   | 3.1   | 2.3   | 2.6   | 1.9   |
| Rad51ap1 | 1.3   | 2.6   | 4.1   | 0.8   | 3.8   | 0.3   | 3.7   | 2.0   | 2.9   | 1.3   | 2.7   | 2.0   |
| Rad51b   | 1.5   | 1.4   | 1.8   | 0.9   | 1.1   | 0.7   | 0.8   | 0.4   | 0.5   | 0.5   | 0.4   | 0.7   |
| Rad51c   | 0.1   | 0.4   | 0.7   | 0.1   | 0.4   | 0.2   | 0.5   | 0.4   | 0.2   | 0.1   | 0.3   | 0.3   |
| Rad51d   | 2.3   | 2.0   | 1.9   | 2.0   | 1.7   | 2.5   | 1.6   | 1.8   | 1.9   | 2.1   | 2.1   | 1.9   |
| Rad52    | 4.9   | 5.1   | 4.1   | 4.1   | 4.3   | 5.0   | 4.4   | 4.6   | 4.8   | 4.8   | 5.9   | 5.8   |
| Rad54b   | 0.7   | 1.0   | 1.9   | 0.4   | 1.1   | 0.5   | 1.6   | 0.5   | 1.3   | 0.6   | 1.1   | 0.9   |
| Rad54I   | 0.5   | 1.1   | 1.6   | 0.2   | 1.4   | 0.2   | 1.8   | 0.8   | 1.4   | 0.6   | 1.2   | 0.7   |
| Rad54I2  | 2.5   | 2.8   | 3.1   | 2.8   | 2.4   | 2.5   | 2.9   | 2.7   | 2.7   | 2.6   | 2.5   | 2.7   |
| Rad9a    | 9.1   | 9.1   | 8.0   | 9.7   | 9.0   | 8.2   | 8.4   | 9.2   | 9.3   | 9.2   | 8.8   | 7.3   |
| Rad9b    | 0.8   | 1.6   | 0.9   | 0.4   | 0.5   | 0.7   | 0.8   | 0.6   | 0.7   | 0.9   | 0.7   | 0.5   |
| Radil    | 0.6   | 0.5   | 0.5   | 0.5   | 0.6   | 1.1   | 0.6   | 0.6   | 0.5   | 0.4   | 0.5   | 0.5   |
| Rae1     | 17.2  | 14.2  | 12.6  | 16.4  | 13.1  | 17.6  | 13.8  | 14.2  | 14.2  | 14.5  | 15.5  | 13.5  |
| Rae1a    | 2.1   | 0.8   | 0.8   | 1.6   | 1.4   | 1.8   | 0.7   | 0.2   | 0.2   | 1.0   | 0.7   | 0.5   |
| Rae1b    | 0.0   | 0.0   | 0.0   | 0.0   | 0.0   | 0.0   | 0.0   | 0.0   | 0.0   | 0.0   | 0.0   | 0.0   |
| Rae1c    | 1.9   | 0.8   | 0.7   | 0.6   | 1.8   | 1.9   | 1.2   | 0.3   | 0.6   | 0.9   | 1.3   | 0.8   |
| Rae1d    | 5.7   | 5.1   | 6.4   | 5.9   | 6.4   | 5.1   | 5.1   | 2.7   | 3.6   | 3.0   | 5.1   | 3.9   |
| Rae1e    | 8.0   | 3.9   | 5.4   | 6.6   | 6.3   | 5.1   | 3.0   | 1.8   | 2.5   | 4.0   | 3.5   | 4.1   |
| Raf1     | 20.0  | 20.1  | 19.4  | 19.6  | 21.1  | 16.9  | 20.1  | 22.1  | 20.9  | 18.2  | 20.6  | 19.9  |
| Rai1     | 2.0   | 3.0   | 2.5   | 2.1   | 2.5   | 2.5   | 2.9   | 2.5   | 3.0   | 2.7   | 2.4   | 2.1   |
| Rai14    | 61.6  | 62.7  | 55.9  | 67.1  | 62.3  | 40.5  | 61.9  | 33.8  | 60.3  | 67.6  | 74.9  | 101.1 |
| Rai2     | 2.5   | 4.2   | 8.1   | 2.0   | 3.3   | 2.5   | 4.4   | 7.2   | 3.6   | 2.2   | 2.4   | 5.3   |
| Rala     | 26.7  | 23.4  | 24.5  | 32.6  | 23.8  | 26.8  | 27.1  | 25.7  | 24.6  | 25.2  | 31.7  | 29.1  |
| Ralb     | 24.0  | 22.7  | 22.6  | 24.0  | 31.6  | 21.2  | 28.7  | 30.4  | 31.4  | 28.3  | 27.5  | 29.6  |
| Ralbp1   | 36.5  | 34.3  | 34.8  | 38.2  | 33.7  | 34.2  | 37.5  | 33.7  | 32.7  | 30.3  | 36.4  | 38.5  |
| Ralgapa1 | 7.2   | 7.8   | 6.7   | 6.3   | 6.3   | 7.6   | 5.9   | 6.0   | 6.7   | 7.3   | 7.6   | 6.9   |
| Ralgapa2 | 2.8   | 2.0   | 2.6   | 5.8   | 9.6   | 2.0   | 2.8   | 2.3   | 1.9   | 2.6   | 2.1   | 2.4   |
| Ralgapb  | 13.1  | 12.8  | 11.3  | 13.1  | 12.0  | 13.4  | 11.7  | 11.8  | 12.4  | 11.8  | 12.4  | 11.9  |

Online Table 1

|          |       |      |      |       |       |       |       |      |      |       |       |      |
|----------|-------|------|------|-------|-------|-------|-------|------|------|-------|-------|------|
| Ralgds   | 7.9   | 6.7  | 7.0  | 8.1   | 7.7   | 8.3   | 7.9   | 5.7  | 6.3  | 6.8   | 7.4   | 6.3  |
| Ralgps1  | 1.4   | 1.3  | 1.0  | 1.2   | 1.4   | 1.8   | 1.3   | 1.4  | 1.0  | 0.9   | 1.1   | 1.0  |
| Ralgps2  | 5.1   | 7.7  | 7.7  | 4.7   | 7.1   | 3.1   | 7.4   | 5.8  | 10.0 | 5.7   | 6.4   | 8.0  |
| Raly     | 76.1  | 73.3 | 65.6 | 81.3  | 66.6  | 65.6  | 73.5  | 66.4 | 71.9 | 61.2  | 78.5  | 65.7 |
| Ramp1    | 0.1   | 0.1  | 0.2  | 0.3   | 0.2   | 0.1   | 0.2   | 0.1  | 0.4  | 0.5   | 0.4   | 0.5  |
| Ramp2    | 1.5   | 3.6  | 6.2  | 1.2   | 1.6   | 1.0   | 1.7   | 6.4  | 1.5  | 0.6   | 1.1   | 1.8  |
| Ramp3    | 0.0   | 0.0  | 0.1  | 0.0   | 0.0   | 0.0   | 0.1   | 0.0  | 0.1  | 0.0   | 0.1   | 0.0  |
| Ran      | 120.5 | 99.2 | 76.7 | 118.3 | 109.2 | 111.0 | 95.6  | 88.4 | 95.4 | 100.2 | 97.3  | 80.1 |
| Ranbp1   | 90.1  | 80.0 | 93.8 | 112.5 | 83.5  | 87.7  | 114.5 | 92.0 | 78.9 | 79.9  | 109.3 | 92.0 |
| Ranbp10  | 4.5   | 4.8  | 4.4  | 4.8   | 4.8   | 4.0   | 5.0   | 5.0  | 4.7  | 4.4   | 4.7   | 4.5  |
| Ranbp17  | 0.5   | 0.5  | 0.4  | 0.5   | 0.4   | 0.4   | 0.6   | 0.5  | 0.5  | 0.4   | 0.6   | 0.4  |
| Ranbp2   | 26.5  | 26.3 | 23.1 | 23.9  | 26.1  | 24.0  | 21.9  | 22.3 | 21.7 | 26.1  | 27.5  | 25.7 |
| Ranbp3   | 20.2  | 20.1 | 18.0 | 20.5  | 19.4  | 22.5  | 19.6  | 20.5 | 19.7 | 19.8  | 19.5  | 19.2 |
| Ranbp3l  | 0.0   | 0.0  | 0.0  | 0.1   | 0.0   | 0.0   | 0.0   | 0.0  | 0.0  | 0.0   | 0.0   | 0.0  |
| Ranbp6   | 3.1   | 3.9  | 3.8  | 2.9   | 3.2   | 4.2   | 2.6   | 3.3  | 3.7  | 4.1   | 3.7   | 3.8  |
| Ranbp9   | 16.9  | 17.8 | 18.9 | 18.1  | 14.6  | 21.2  | 15.1  | 14.3 | 13.7 | 14.4  | 16.0  | 16.1 |
| Rangap1  | 17.9  | 19.2 | 21.3 | 19.5  | 24.4  | 17.3  | 25.2  | 18.1 | 21.0 | 18.8  | 20.7  | 18.2 |
| Rangrf   | 7.9   | 7.3  | 5.4  | 7.4   | 5.7   | 4.7   | 6.3   | 6.5  | 7.1  | 7.0   | 7.4   | 5.1  |
| Rap1a    | 29.7  | 29.6 | 37.0 | 35.6  | 40.5  | 31.7  | 39.9  | 36.9 | 37.5 | 37.8  | 45.1  | 42.7 |
| Rap1b    | 55.8  | 57.7 | 59.1 | 73.2  | 83.0  | 58.0  | 64.0  | 59.5 | 56.4 | 59.8  | 73.4  | 68.0 |
| Rap1gap  | 1.1   | 1.1  | 0.9  | 0.9   | 0.7   | 1.0   | 0.6   | 0.4  | 0.5  | 0.6   | 0.6   | 0.6  |
| Rap1gap2 | 2.2   | 2.3  | 2.1  | 2.9   | 4.5   | 2.4   | 5.5   | 2.5  | 4.1  | 3.8   | 3.7   | 4.0  |
| Rap1gds1 | 20.1  | 18.8 | 15.3 | 23.0  | 21.8  | 22.1  | 18.8  | 16.0 | 17.2 | 17.2  | 18.7  | 15.9 |
| Rap2a    | 10.4  | 12.0 | 10.7 | 11.7  | 14.9  | 8.5   | 10.4  | 9.9  | 11.8 | 15.9  | 12.4  | 11.0 |
| Rap2b    | 17.6  | 17.3 | 18.7 | 18.9  | 18.8  | 19.3  | 15.8  | 19.0 | 16.2 | 16.1  | 16.4  | 18.0 |
| Rap2c    | 7.9   | 8.7  | 10.7 | 10.8  | 10.4  | 9.8   | 9.4   | 8.7  | 8.7  | 11.5  | 11.0  | 11.5 |
| Rapgef1  | 18.1  | 15.4 | 12.5 | 18.3  | 14.2  | 17.4  | 17.6  | 14.3 | 14.6 | 13.0  | 14.7  | 13.0 |
| Rapgef2  | 7.1   | 7.5  | 7.8  | 7.5   | 7.4   | 6.4   | 8.2   | 7.6  | 7.0  | 7.2   | 7.2   | 7.8  |
| Rapgef3  | 12.4  | 10.1 | 8.2  | 11.8  | 8.9   | 14.0  | 11.0  | 9.0  | 10.1 | 14.0  | 12.2  | 11.9 |
| Rapgef4  | 0.5   | 0.3  | 0.1  | 0.3   | 0.4   | 0.2   | 0.4   | 0.2  | 0.3  | 0.4   | 0.3   | 0.4  |
| Rapgef5  | 2.3   | 1.1  | 1.2  | 4.9   | 6.2   | 0.4   | 1.5   | 0.5  | 0.6  | 0.5   | 0.4   | 0.7  |
| Rapgef6  | 6.3   | 9.2  | 9.3  | 6.0   | 6.4   | 6.2   | 6.8   | 7.4  | 7.9  | 7.6   | 8.0   | 9.7  |
| Rapgef11 | 0.3   | 0.6  | 0.5  | 0.3   | 0.3   | 0.3   | 0.4   | 0.4  | 0.5  | 0.4   | 0.3   | 0.3  |
| Raph1    | 4.6   | 5.5  | 4.3  | 5.2   | 4.9   | 4.9   | 4.5   | 3.1  | 3.5  | 3.0   | 3.5   | 3.2  |
| Rapsn    | 2.4   | 1.5  | 0.9  | 2.7   | 1.5   | 2.7   | 1.4   | 0.5  | 1.0  | 1.2   | 0.9   | 1.5  |
| Rara     | 3.3   | 5.8  | 6.3  | 4.5   | 4.5   | 5.1   | 5.4   | 8.3  | 5.9  | 4.4   | 5.0   | 5.2  |
| Rarb     | 1.4   | 1.4  | 0.8  | 0.8   | 1.0   | 0.8   | 0.8   | 0.5  | 1.3  | 1.2   | 0.9   | 1.5  |
| Rarg     | 12.0  | 14.0 | 13.1 | 12.0  | 11.0  | 11.8  | 12.5  | 13.4 | 14.2 | 12.5  | 12.9  | 13.5 |
| Rarres1  | 0.9   | 0.6  | 1.0  | 0.4   | 0.9   | 0.2   | 0.4   | 0.9  | 0.6  | 1.4   | 0.4   | 1.2  |
| Rarres2  | 4.6   | 4.8  | 12.0 | 2.7   | 6.0   | 2.4   | 3.5   | 4.5  | 5.0  | 3.7   | 2.3   | 3.5  |
| Rars     | 76.0  | 58.3 | 50.3 | 88.4  | 59.8  | 76.9  | 58.6  | 49.0 | 44.5 | 54.4  | 67.7  | 56.6 |
| Rars2    | 8.1   | 9.2  | 8.8  | 8.1   | 8.6   | 8.4   | 8.3   | 9.5  | 9.2  | 8.2   | 10.0  | 9.2  |
| Rasa1    | 18.4  | 16.5 | 16.3 | 19.5  | 19.0  | 17.7  | 16.5  | 14.0 | 17.2 | 20.5  | 19.5  | 20.8 |
| Rasa2    | 4.3   | 5.3  | 5.2  | 5.3   | 5.3   | 5.1   | 5.8   | 5.0  | 5.6  | 5.4   | 5.8   | 5.8  |
| Rasa3    | 34.5  | 62.2 | 86.5 | 33.8  | 50.4  | 34.8  | 51.5  | 74.9 | 52.6 | 46.3  | 42.2  | 64.1 |
| Rasa4    | 12.6  | 13.3 | 9.3  | 21.5  | 15.4  | 20.4  | 15.3  | 11.8 | 16.9 | 9.5   | 13.8  | 9.3  |
| Rasal1   | 0.2   | 0.2  | 0.1  | 0.1   | 0.1   | 0.1   | 0.0   | 0.0  | 0.1  | 0.1   | 0.1   | 0.0  |
| Rasal2   | 3.7   | 3.7  | 4.1  | 3.2   | 3.5   | 3.0   | 4.2   | 4.2  | 4.1  | 4.6   | 4.3   | 5.3  |
| Rasal3   | 0.1   | 0.0  | 0.0  | 0.6   | 1.4   | 0.0   | 0.3   | 0.0  | 0.0  | 0.0   | 0.0   | 0.1  |
| Rasd1    | 0.0   | 0.0  | 0.1  | 0.1   | 0.0   | 0.3   | 0.0   | 0.0  | 0.1  | 0.1   | 0.0   | 0.1  |
| Rasd2    | 0.0   | 0.0  | 0.0  | 0.1   | 0.0   | 0.0   | 0.0   | 0.0  | 0.0  | 0.0   | 0.0   | 0.0  |
| Rasef    | 0.0   | 0.0  | 0.0  | 0.0   | 0.0   | 0.0   | 0.0   | 0.0  | 0.0  | 0.0   | 0.0   | 0.0  |
| Rasgef1a | 0.3   | 0.1  | 0.1  | 0.4   | 0.1   | 0.3   | 0.1   | 0.1  | 0.0  | 0.0   | 0.1   | 0.1  |
| Rasgef1b | 0.6   | 0.1  | 0.2  | 4.8   | 5.5   | 0.1   | 0.8   | 0.2  | 0.3  | 0.6   | 0.2   | 0.5  |
| Rasgef1c | 0.0   | 0.1  | 0.2  | 0.0   | 0.1   | 0.0   | 0.1   | 0.2  | 0.0  | 0.1   | 0.1   | 0.0  |
| Rasgrf2  | 0.1   | 0.0  | 0.0  | 0.0   | 0.0   | 0.0   | 0.0   | 0.1  | 0.2  | 1.2   | 0.5   | 0.3  |
| Rasgrp1  | 0.0   | 0.0  | 0.0  | 0.0   | 0.0   | 0.0   | 0.0   | 0.0  | 0.0  | 0.0   | 0.1   | 0.0  |

Online Table 1

|              |      |      |      |      |      |      |      |      |      |      |      |      |
|--------------|------|------|------|------|------|------|------|------|------|------|------|------|
| Rasgrp2      | 0.4  | 0.4  | 0.4  | 0.5  | 0.2  | 0.2  | 0.8  | 0.5  | 0.8  | 0.2  | 0.4  | 0.2  |
| Rasgrp3      | 3.0  | 1.4  | 1.1  | 2.8  | 1.4  | 2.5  | 1.7  | 2.0  | 2.1  | 2.5  | 2.7  | 1.2  |
| Rasgrp4      | 0.2  | 0.1  | 0.1  | 0.2  | 0.5  | 0.1  | 0.2  | 0.2  | 0.2  | 0.1  | 0.2  | 0.2  |
| Rasip1       | 0.2  | 0.2  | 0.2  | 0.3  | 0.1  | 0.0  | 0.1  | 0.3  | 0.3  | 0.1  | 0.2  | 0.1  |
| Rasl10a      | 0.5  | 0.2  | 0.3  | 0.5  | 0.3  | 0.5  | 0.3  | 0.2  | 0.3  | 0.3  | 0.2  | 0.2  |
| Rasl10b      | 0.1  | 0.0  | 0.1  | 0.0  | 0.0  | 0.0  | 0.1  | 0.1  | 0.0  | 0.2  | 0.1  | 0.1  |
| Rasl11a      | 9.9  | 22.0 | 28.4 | 4.9  | 11.4 | 4.1  | 11.2 | 10.2 | 15.9 | 50.8 | 20.6 | 31.6 |
| Rasl11b      | 1.7  | 0.9  | 2.1  | 1.3  | 3.4  | 1.5  | 2.5  | 2.9  | 2.2  | 2.9  | 1.5  | 2.7  |
| Rasl12       | 1.8  | 3.5  | 4.2  | 2.0  | 3.9  | 1.9  | 3.6  | 5.1  | 4.2  | 1.9  | 2.1  | 3.2  |
| Rasl2-9      | 0.0  | 0.1  | 0.0  | 0.1  | 0.0  | 0.1  | 0.0  | 0.1  | 0.0  | 0.1  | 0.0  | 0.1  |
| Rassf1       | 18.9 | 11.9 | 9.9  | 19.5 | 22.1 | 13.4 | 23.4 | 15.7 | 18.6 | 19.4 | 20.8 | 16.5 |
| Rassf10      | 0.0  | 0.0  | 0.0  | 0.0  | 0.0  | 0.0  | 0.0  | 0.0  | 0.0  | 0.0  | 0.0  | 0.0  |
| Rassf2       | 0.4  | 0.2  | 0.5  | 1.9  | 2.6  | 0.1  | 0.5  | 1.0  | 0.4  | 0.3  | 0.2  | 0.2  |
| Rassf3       | 18.7 | 14.1 | 8.8  | 24.2 | 19.0 | 21.9 | 15.6 | 6.1  | 10.4 | 14.0 | 15.8 | 12.6 |
| Rassf4       | 0.8  | 0.1  | 0.1  | 3.8  | 9.3  | 0.1  | 1.3  | 0.4  | 0.3  | 1.0  | 0.4  | 0.5  |
| Rassf5       | 3.7  | 2.5  | 2.2  | 4.0  | 4.7  | 3.5  | 2.8  | 1.7  | 2.1  | 3.3  | 2.8  | 2.3  |
| Rassf6       | 2.5  | 2.1  | 2.1  | 3.5  | 4.0  | 2.6  | 3.6  | 1.3  | 2.0  | 2.0  | 2.7  | 1.5  |
| Rassf7       | 1.8  | 1.1  | 1.1  | 1.6  | 1.2  | 2.0  | 0.7  | 1.0  | 1.5  | 1.3  | 1.7  | 1.1  |
| Rassf8       | 13.9 | 12.6 | 12.0 | 14.5 | 9.8  | 14.0 | 11.8 | 11.6 | 12.0 | 12.3 | 15.9 | 15.6 |
| Rassf9       | 0.0  | 0.0  | 0.1  | 0.0  | 0.0  | 0.0  | 0.0  | 0.1  | 0.1  | 0.1  | 0.1  | 0.0  |
| Raver1       | 1.5  | 2.9  | 3.2  | 2.9  | 3.2  | 1.9  | 3.6  | 3.7  | 3.5  | 2.9  | 2.6  | 2.5  |
| Raver1-fdx11 | 1.3  | 0.6  | 1.2  | 0.4  | 1.1  | 1.2  | 0.9  | 0.7  | 0.7  | 1.5  | 1.0  | 0.8  |
| Raver2       | 0.7  | 0.8  | 0.7  | 0.6  | 0.5  | 1.3  | 0.7  | 0.5  | 0.6  | 0.5  | 0.6  | 0.6  |
| Rax          | 0.0  | 0.0  | 0.1  | 0.0  | 0.1  | 0.0  | 0.1  | 0.0  | 0.0  | 0.1  | 0.1  | 0.0  |
| Rb1          | 6.3  | 8.7  | 8.9  | 7.0  | 7.5  | 6.8  | 7.2  | 7.2  | 6.5  | 5.9  | 8.5  | 7.3  |
| Rb1cc1       | 16.0 | 17.0 | 17.3 | 16.4 | 15.4 | 15.4 | 15.0 | 15.6 | 16.2 | 16.1 | 19.6 | 19.2 |
| Rbak         | 2.2  | 2.4  | 2.8  | 2.3  | 2.2  | 2.4  | 2.6  | 2.0  | 2.3  | 3.0  | 2.7  | 3.0  |
| Rbbp4        | 30.5 | 30.7 | 28.4 | 28.9 | 27.5 | 30.3 | 26.0 | 26.7 | 28.2 | 31.9 | 31.3 | 29.8 |
| Rbbp5        | 7.0  | 7.3  | 7.7  | 7.8  | 7.4  | 7.8  | 6.6  | 7.5  | 6.5  | 7.2  | 7.5  | 7.0  |
| Rbbp6        | 6.8  | 7.7  | 9.2  | 8.0  | 7.4  | 6.6  | 9.1  | 7.8  | 6.7  | 7.3  | 8.2  | 8.2  |
| Rbbp7        | 47.0 | 51.9 | 48.9 | 40.9 | 46.1 | 38.0 | 49.6 | 46.2 | 51.6 | 62.1 | 61.0 | 55.4 |
| Rbbp8        | 5.3  | 5.4  | 5.4  | 6.5  | 5.8  | 5.1  | 6.6  | 5.1  | 5.7  | 6.1  | 6.0  | 5.3  |
| Rbbp9        | 8.8  | 10.8 | 12.9 | 10.7 | 9.1  | 12.5 | 9.9  | 11.7 | 10.1 | 11.9 | 12.0 | 13.6 |
| Rbck1        | 19.8 | 19.3 | 17.4 | 16.6 | 19.4 | 21.5 | 21.1 | 22.5 | 19.4 | 20.4 | 17.7 | 17.1 |
| Rbfa         | 17.1 | 15.6 | 15.1 | 18.2 | 14.1 | 16.1 | 16.9 | 15.4 | 13.7 | 16.7 | 16.6 | 17.0 |
| Rbfox1       | 0.1  | 0.0  | 0.1  | 0.1  | 0.0  | 0.1  | 0.1  | 0.1  | 0.0  | 0.0  | 0.1  | 0.0  |
| Rbfox2       | 17.1 | 19.5 | 19.3 | 15.9 | 18.9 | 16.5 | 22.0 | 23.2 | 20.8 | 21.5 | 21.0 | 19.6 |
| Rbfox3       | 0.0  | 0.0  | 0.0  | 0.0  | 0.0  | 0.0  | 0.0  | 0.0  | 0.0  | 0.0  | 0.0  | 0.0  |
| Rbks         | 1.8  | 1.6  | 0.9  | 1.6  | 1.5  | 2.2  | 1.8  | 1.4  | 1.5  | 1.4  | 0.9  | 1.4  |
| Rbl1         | 2.1  | 2.6  | 3.2  | 1.7  | 3.0  | 2.4  | 2.8  | 2.4  | 2.3  | 1.8  | 2.5  | 2.2  |
| Rbl2         | 10.6 | 11.0 | 13.0 | 12.0 | 10.0 | 13.4 | 10.3 | 11.5 | 10.5 | 12.4 | 11.9 | 12.9 |
| Rbm10        | 5.7  | 5.8  | 7.6  | 5.6  | 5.9  | 6.1  | 7.0  | 8.7  | 7.4  | 7.3  | 7.7  | 7.1  |
| Rbm11        | 0.1  | 0.0  | 0.0  | 0.2  | 0.0  | 0.2  | 0.2  | 0.0  | 0.0  | 0.1  | 0.0  | 0.1  |
| Rbm12        | 4.1  | 4.5  | 4.9  | 4.0  | 5.0  | 4.4  | 4.4  | 5.6  | 5.5  | 4.5  | 5.2  | 5.3  |
| Rbm12b1      | 4.1  | 5.7  | 4.9  | 4.3  | 4.7  | 5.3  | 4.2  | 4.4  | 5.1  | 5.3  | 4.6  | 5.2  |
| Rbm12b2      | 4.3  | 5.6  | 5.8  | 4.4  | 5.0  | 5.3  | 4.2  | 4.9  | 5.0  | 5.6  | 5.3  | 5.8  |
| Rbm14        | 3.9  | 4.3  | 4.9  | 4.7  | 5.2  | 4.5  | 5.5  | 5.7  | 5.1  | 5.1  | 4.5  | 3.8  |
| Rbm15        | 4.9  | 5.7  | 5.6  | 4.7  | 6.1  | 4.6  | 6.0  | 5.6  | 5.9  | 6.0  | 5.3  | 5.2  |
| Rbm15b       | 9.2  | 9.8  | 10.5 | 8.6  | 8.5  | 11.1 | 9.6  | 11.4 | 11.9 | 10.8 | 10.4 | 10.7 |
| Rbm17        | 52.3 | 46.5 | 53.1 | 56.0 | 43.9 | 53.1 | 56.2 | 48.1 | 39.2 | 46.9 | 55.4 | 57.7 |
| Rbm18        | 10.6 | 10.4 | 11.6 | 12.1 | 12.0 | 10.7 | 11.6 | 11.3 | 12.2 | 13.3 | 12.7 | 13.3 |
| Rbm19        | 4.9  | 3.9  | 3.4  | 5.7  | 4.6  | 4.2  | 4.2  | 4.0  | 3.6  | 4.1  | 3.8  | 3.3  |
| Rbm20        | 0.1  | 0.1  | 0.1  | 0.1  | 0.1  | 0.1  | 0.1  | 0.1  | 0.1  | 0.3  | 0.2  | 0.2  |
| Rbm22        | 10.5 | 11.9 | 13.2 | 11.5 | 10.9 | 11.2 | 12.8 | 13.6 | 12.8 | 12.4 | 13.8 | 14.1 |
| Rbm24        | 0.0  | 0.0  | 0.0  | 0.0  | 0.0  | 0.0  | 0.0  | 0.0  | 0.0  | 0.0  | 0.0  | 0.0  |
| Rbm25        | 22.4 | 23.6 | 28.0 | 26.4 | 21.1 | 20.3 | 29.0 | 24.7 | 19.6 | 21.2 | 30.6 | 29.5 |
| Rbm26        | 5.4  | 6.2  | 8.4  | 5.6  | 6.4  | 5.9  | 7.5  | 6.8  | 5.5  | 7.4  | 7.9  | 7.0  |

Online Table 1

|        |       |       |       |       |       |       |       |       |       |       |       |       |
|--------|-------|-------|-------|-------|-------|-------|-------|-------|-------|-------|-------|-------|
| Rbm27  | 4.4   | 5.1   | 5.5   | 5.2   | 4.5   | 4.2   | 4.9   | 5.1   | 4.2   | 4.6   | 5.0   | 5.5   |
| Rbm28  | 27.8  | 20.9  | 19.4  | 29.1  | 19.2  | 25.9  | 21.2  | 20.2  | 19.2  | 25.8  | 25.7  | 19.4  |
| Rbm3   | 51.0  | 27.3  | 39.8  | 46.9  | 36.0  | 30.1  | 51.4  | 40.0  | 33.4  | 25.3  | 46.3  | 48.6  |
| Rbm33  | 2.4   | 3.2   | 3.2   | 2.7   | 2.6   | 2.5   | 2.9   | 2.6   | 2.5   | 2.6   | 2.6   | 2.7   |
| Rbm34  | 4.2   | 4.8   | 4.6   | 5.1   | 4.4   | 4.9   | 4.4   | 4.3   | 4.2   | 4.5   | 5.3   | 4.6   |
| Rbm38  | 0.5   | 0.6   | 0.5   | 1.0   | 1.2   | 0.6   | 0.7   | 0.5   | 0.4   | 1.1   | 0.7   | 0.4   |
| Rbm39  | 53.7  | 58.5  | 68.9  | 54.7  | 51.0  | 49.6  | 55.9  | 67.1  | 57.2  | 66.8  | 68.0  | 70.6  |
| Rbm4   | 4.4   | 5.0   | 4.4   | 5.4   | 4.9   | 4.2   | 5.5   | 6.4   | 5.3   | 4.8   | 5.1   | 4.1   |
| Rbm41  | 2.4   | 3.2   | 3.6   | 2.4   | 2.6   | 2.0   | 2.7   | 3.4   | 3.0   | 2.5   | 3.7   | 3.8   |
| Rbm42  | 30.9  | 31.9  | 25.9  | 32.9  | 28.6  | 29.1  | 29.7  | 31.6  | 30.5  | 29.9  | 27.9  | 26.5  |
| Rbm43  | 11.6  | 9.0   | 9.5   | 12.1  | 10.5  | 11.6  | 9.3   | 7.2   | 7.6   | 9.0   | 10.6  | 10.2  |
| Rbm44  | 0.1   | 0.3   | 0.2   | 0.1   | 0.2   | 0.1   | 0.2   | 0.1   | 0.1   | 0.1   | 0.1   | 0.1   |
| Rbm45  | 23.8  | 21.7  | 21.4  | 21.3  | 20.5  | 21.1  | 22.5  | 22.3  | 21.5  | 23.4  | 23.4  | 23.2  |
| Rbm46  | 0.3   | 0.4   | 0.4   | 0.1   | 0.2   | 0.0   | 0.2   | 0.4   | 0.4   | 0.2   | 0.3   | 0.2   |
| Rbm47  | 0.7   | 0.7   | 0.5   | 1.2   | 1.3   | 0.7   | 0.5   | 0.3   | 0.3   | 0.5   | 0.5   | 0.6   |
| Rbm48  | 1.9   | 1.9   | 3.0   | 2.1   | 2.1   | 2.1   | 2.0   | 2.0   | 1.6   | 2.4   | 2.2   | 2.4   |
| Rbm4b  | 2.8   | 3.6   | 3.8   | 2.9   | 2.5   | 3.3   | 3.0   | 3.7   | 2.7   | 3.4   | 3.8   | 3.5   |
| Rbm5   | 25.7  | 29.2  | 35.1  | 28.3  | 26.5  | 26.3  | 29.3  | 35.0  | 31.8  | 30.2  | 34.3  | 36.1  |
| Rbm6   | 18.8  | 19.1  | 21.1  | 18.4  | 16.2  | 17.6  | 17.2  | 18.8  | 17.7  | 18.6  | 21.0  | 22.4  |
| Rbm7   | 25.4  | 23.7  | 26.9  | 30.7  | 22.0  | 27.5  | 24.1  | 25.8  | 23.5  | 26.1  | 30.3  | 29.4  |
| Rbm8a  | 17.5  | 17.1  | 19.5  | 21.0  | 14.1  | 17.5  | 17.8  | 16.9  | 15.4  | 17.8  | 20.1  | 21.5  |
| Rbms1  | 43.7  | 47.0  | 47.5  | 46.6  | 43.3  | 37.9  | 57.8  | 51.2  | 53.5  | 48.7  | 58.0  | 54.8  |
| Rbms2  | 12.6  | 12.0  | 12.3  | 11.4  | 10.2  | 12.0  | 12.3  | 14.2  | 13.0  | 11.6  | 13.5  | 12.8  |
| Rbms3  | 22.7  | 28.6  | 32.7  | 22.8  | 25.2  | 22.5  | 32.5  | 33.3  | 31.5  | 25.6  | 31.0  | 31.2  |
| Rbmx   | 6.8   | 8.1   | 9.9   | 6.0   | 7.3   | 5.4   | 8.1   | 9.1   | 8.2   | 5.5   | 7.1   | 7.0   |
| Rbmx2  | 2.3   | 2.6   | 2.7   | 1.6   | 2.9   | 2.1   | 3.7   | 2.7   | 2.7   | 2.8   | 3.2   | 2.6   |
| Rbmx11 | 16.7  | 15.4  | 17.7  | 16.7  | 15.3  | 16.3  | 18.5  | 15.7  | 16.3  | 20.6  | 18.8  | 19.1  |
| Rbp1   | 33.7  | 23.4  | 29.9  | 36.7  | 36.6  | 27.5  | 57.1  | 20.9  | 58.6  | 67.5  | 51.4  | 73.7  |
| Rbp4   | 0.0   | 0.0   | 0.0   | 0.1   | 0.0   | 0.0   | 0.0   | 0.0   | 0.1   | 0.0   | 0.0   | 0.0   |
| Rbpj   | 23.5  | 16.8  | 14.2  | 29.4  | 22.0  | 34.2  | 11.8  | 8.1   | 8.3   | 13.8  | 12.3  | 11.5  |
| Rbpjl  | 0.0   | 0.0   | 0.0   | 0.0   | 0.0   | 0.0   | 0.0   | 0.0   | 0.0   | 0.1   | 0.0   | 0.0   |
| Rbpms  | 9.1   | 11.1  | 12.1  | 10.2  | 7.3   | 8.9   | 10.8  | 9.6   | 7.8   | 10.9  | 10.2  | 9.4   |
| Rbpms2 | 2.4   | 2.7   | 2.6   | 3.1   | 2.0   | 3.7   | 2.4   | 2.1   | 2.4   | 1.8   | 1.8   | 2.0   |
| Rbx1   | 38.7  | 35.2  | 34.8  | 40.8  | 34.1  | 34.7  | 35.5  | 35.8  | 39.2  | 42.8  | 40.0  | 39.6  |
| Rc3h1  | 4.5   | 5.5   | 5.5   | 4.7   | 5.4   | 5.0   | 4.9   | 5.7   | 4.9   | 5.4   | 5.7   | 5.3   |
| Rc3h2  | 11.0  | 12.8  | 11.4  | 12.8  | 10.8  | 11.9  | 11.1  | 10.1  | 10.4  | 10.7  | 12.7  | 11.9  |
| Rcan1  | 11.5  | 7.3   | 6.2   | 12.9  | 8.9   | 10.4  | 9.8   | 6.9   | 6.9   | 9.7   | 10.4  | 8.3   |
| Rcan2  | 12.4  | 12.1  | 9.2   | 10.1  | 4.5   | 11.3  | 3.1   | 2.9   | 3.3   | 6.3   | 5.4   | 5.4   |
| Rcan3  | 6.5   | 5.8   | 4.8   | 7.4   | 5.6   | 8.5   | 5.9   | 5.1   | 5.8   | 4.3   | 5.2   | 5.5   |
| Rcbtb1 | 12.3  | 11.7  | 10.6  | 10.3  | 9.4   | 13.7  | 8.7   | 8.9   | 9.7   | 10.2  | 11.5  | 10.6  |
| Rcbtb2 | 11.4  | 12.4  | 11.8  | 12.6  | 10.2  | 14.4  | 9.9   | 11.4  | 11.0  | 11.3  | 10.7  | 12.5  |
| Rcc1   | 3.3   | 3.2   | 3.2   | 3.3   | 4.2   | 2.6   | 5.2   | 3.6   | 4.1   | 3.7   | 3.5   | 3.3   |
| Rcc2   | 16.6  | 15.4  | 14.8  | 18.1  | 19.7  | 17.7  | 18.6  | 25.1  | 19.8  | 18.9  | 18.3  | 14.6  |
| Rccd1  | 2.2   | 2.3   | 1.8   | 2.1   | 2.2   | 1.6   | 1.4   | 1.4   | 2.4   | 1.8   | 2.1   | 1.7   |
| Rce1   | 7.1   | 8.3   | 7.3   | 7.9   | 7.9   | 5.8   | 9.0   | 10.3  | 9.9   | 8.0   | 8.8   | 6.9   |
| Rchy1  | 15.0  | 12.6  | 11.6  | 12.9  | 10.9  | 12.0  | 10.4  | 10.4  | 10.8  | 16.6  | 11.3  | 12.7  |
| Rcl1   | 6.8   | 7.1   | 7.3   | 6.7   | 8.0   | 6.6   | 8.2   | 7.9   | 7.7   | 8.3   | 7.4   | 7.0   |
| Rcn1   | 117.6 | 94.5  | 100.9 | 139.0 | 94.0  | 137.6 | 117.2 | 101.0 | 100.6 | 118.5 | 121.6 | 130.4 |
| Rcn2   | 115.6 | 86.3  | 85.2  | 100.3 | 88.2  | 112.5 | 94.1  | 75.6  | 89.3  | 102.7 | 105.4 | 104.9 |
| Rcn3   | 272.8 | 246.5 | 308.6 | 326.7 | 276.3 | 306.0 | 364.5 | 339.6 | 317.6 | 338.4 | 312.6 | 351.8 |
| Rcor1  | 7.3   | 10.5  | 9.7   | 8.0   | 8.2   | 7.5   | 9.6   | 9.2   | 9.0   | 8.5   | 9.4   | 8.2   |
| Rcor2  | 0.6   | 1.0   | 0.8   | 0.5   | 0.3   | 0.5   | 0.4   | 1.3   | 0.6   | 0.5   | 0.6   | 0.3   |
| Rcor3  | 3.5   | 3.6   | 4.9   | 4.0   | 3.6   | 4.2   | 4.4   | 5.9   | 4.8   | 3.4   | 4.1   | 3.8   |
| Rcsd1  | 6.0   | 7.6   | 8.8   | 9.4   | 10.2  | 6.1   | 6.9   | 6.0   | 5.4   | 5.8   | 5.3   | 6.8   |
| Rcvrn  | 0.0   | 0.0   | 0.0   | 0.0   | 0.0   | 0.1   | 0.0   | 0.0   | 0.1   | 0.1   | 0.1   | 0.0   |
| Rd3    | 0.1   | 0.0   | 0.0   | 0.0   | 0.0   | 0.0   | 0.0   | 0.0   | 0.1   | 0.0   | 0.1   | 0.0   |
| Rdh1   | 0.0   | 0.0   | 0.0   | 0.0   | 0.0   | 0.0   | 0.0   | 0.0   | 0.0   | 0.0   | 0.0   | 0.0   |

Online Table 1

|        |       |      |      |       |      |      |       |      |      |      |       |      |
|--------|-------|------|------|-------|------|------|-------|------|------|------|-------|------|
| Rdh10  | 1.9   | 1.6  | 1.5  | 2.2   | 2.6  | 1.5  | 2.3   | 1.6  | 2.5  | 3.9  | 3.0   | 2.4  |
| Rdh11  | 16.8  | 18.7 | 16.9 | 13.9  | 14.8 | 15.2 | 20.4  | 16.8 | 19.0 | 13.0 | 17.5  | 13.1 |
| Rdh12  | 0.3   | 0.8  | 0.9  | 0.5   | 0.6  | 0.6  | 0.6   | 0.6  | 0.4  | 0.6  | 0.3   | 0.5  |
| Rdh13  | 3.7   | 3.8  | 3.1  | 4.7   | 3.9  | 4.2  | 4.0   | 3.4  | 3.7  | 3.1  | 3.6   | 3.2  |
| Rdh14  | 12.6  | 11.1 | 10.7 | 11.3  | 10.7 | 10.0 | 9.8   | 11.5 | 11.7 | 13.2 | 13.8  | 13.8 |
| Rdh16  | 0.0   | 0.0  | 0.0  | 0.0   | 0.0  | 0.0  | 0.0   | 0.0  | 0.0  | 0.0  | 0.0   | 0.0  |
| Rdh19  | 0.0   | 0.0  | 0.0  | 0.0   | 0.0  | 0.0  | 0.0   | 0.0  | 0.0  | 0.0  | 0.0   | 0.0  |
| Rdh5   | 2.0   | 2.1  | 2.5  | 1.3   | 2.8  | 2.7  | 2.2   | 3.2  | 2.2  | 2.0  | 2.5   | 2.5  |
| Rdh9   | 0.2   | 0.1  | 0.1  | 0.1   | 0.1  | 0.0  | 0.1   | 0.1  | 0.0  | 0.1  | 0.1   | 0.0  |
| Rdm1   | 1.7   | 3.6  | 2.4  | 0.6   | 2.5  | 3.2  | 2.7   | 2.0  | 3.3  | 4.2  | 5.1   | 2.8  |
| Rdx    | 43.9  | 47.7 | 57.3 | 50.6  | 40.7 | 46.1 | 46.5  | 47.9 | 42.1 | 45.3 | 56.8  | 59.6 |
| Rec8   | 0.0   | 0.1  | 0.1  | 0.0   | 0.0  | 0.0  | 0.1   | 0.0  | 0.1  | 0.3  | 0.2   | 0.0  |
| Reck   | 18.7  | 17.6 | 21.3 | 11.3  | 10.5 | 15.4 | 13.2  | 13.9 | 13.0 | 13.3 | 14.4  | 16.9 |
| Recql  | 9.9   | 10.6 | 10.0 | 9.5   | 11.0 | 9.1  | 10.9  | 8.4  | 9.7  | 9.0  | 9.8   | 9.5  |
| Recql4 | 0.3   | 0.4  | 0.6  | 0.2   | 0.4  | 0.2  | 0.8   | 0.5  | 0.4  | 0.3  | 0.3   | 0.3  |
| Recql5 | 3.3   | 3.2  | 3.5  | 2.7   | 3.0  | 2.7  | 3.1   | 3.4  | 3.5  | 3.1  | 2.9   | 3.5  |
| Reep1  | 0.3   | 0.2  | 0.2  | 0.2   | 0.1  | 0.4  | 0.2   | 0.2  | 0.3  | 0.8  | 0.4   | 0.2  |
| Reep2  | 0.6   | 0.3  | 0.5  | 0.3   | 0.6  | 0.6  | 0.3   | 0.1  | 0.3  | 0.5  | 0.4   | 0.4  |
| Reep3  | 11.0  | 9.2  | 9.2  | 14.8  | 11.9 | 14.4 | 10.3  | 11.4 | 8.9  | 8.8  | 11.0  | 9.8  |
| Reep4  | 6.2   | 5.5  | 7.1  | 5.5   | 7.2  | 5.0  | 8.8   | 6.2  | 7.2  | 6.3  | 6.6   | 5.3  |
| Reep5  | 57.9  | 50.4 | 42.4 | 73.4  | 56.7 | 60.6 | 51.7  | 44.1 | 44.6 | 47.7 | 52.4  | 51.7 |
| Reep6  | 0.4   | 0.4  | 0.6  | 0.5   | 0.5  | 0.4  | 0.5   | 0.3  | 0.3  | 0.4  | 0.4   | 0.3  |
| Reg4   | 0.0   | 0.0  | 0.0  | 0.0   | 0.1  | 0.1  | 0.0   | 0.1  | 0.0  | 0.1  | 0.0   | 0.0  |
| Rel    | 0.6   | 0.6  | 0.6  | 0.7   | 1.2  | 0.8  | 0.8   | 0.7  | 0.7  | 0.6  | 0.7   | 0.8  |
| Rela   | 15.0  | 16.8 | 15.1 | 20.5  | 18.9 | 16.5 | 21.4  | 15.2 | 15.5 | 13.2 | 14.1  | 13.9 |
| Relb   | 11.0  | 9.6  | 9.0  | 9.6   | 13.5 | 10.5 | 13.0  | 9.3  | 10.4 | 9.1  | 7.4   | 9.2  |
| Rel1   | 5.4   | 6.4  | 7.0  | 6.3   | 5.2  | 6.7  | 6.1   | 5.8  | 7.6  | 4.9  | 6.6   | 6.8  |
| Rel2   | 0.1   | 0.0  | 0.1  | 0.1   | 0.1  | 0.1  | 0.0   | 0.1  | 0.2  | 0.2  | 0.1   | 0.0  |
| Reln   | 0.0   | 0.0  | 0.0  | 0.1   | 0.0  | 0.0  | 0.0   | 0.0  | 0.0  | 0.0  | 0.0   | 0.0  |
| Relt   | 0.8   | 0.9  | 1.0  | 1.2   | 1.4  | 1.2  | 1.5   | 1.3  | 1.0  | 1.1  | 1.2   | 0.9  |
| Rem1   | 1.0   | 0.5  | 0.8  | 0.8   | 0.5  | 1.5  | 0.7   | 0.6  | 0.5  | 2.0  | 1.0   | 1.3  |
| Rem2   | 0.0   | 0.0  | 0.0  | 0.0   | 0.0  | 0.0  | 0.0   | 0.0  | 0.0  | 0.0  | 0.0   | 0.0  |
| Renbp  | 43.5  | 28.9 | 23.3 | 46.9  | 35.2 | 46.2 | 24.6  | 21.3 | 20.5 | 33.6 | 26.4  | 33.1 |
| Rep15  | 3.1   | 3.6  | 3.7  | 3.6   | 3.1  | 4.9  | 4.9   | 3.9  | 4.7  | 6.3  | 5.6   | 6.3  |
| Repin1 | 5.7   | 5.9  | 5.6  | 5.3   | 5.4  | 7.2  | 4.5   | 5.5  | 5.3  | 4.5  | 4.6   | 4.2  |
| Reps1  | 10.9  | 11.1 | 9.4  | 9.9   | 10.0 | 10.3 | 10.8  | 10.0 | 10.4 | 12.2 | 11.5  | 10.3 |
| Reps2  | 0.6   | 1.1  | 1.8  | 0.8   | 1.2  | 0.4  | 0.8   | 1.4  | 1.0  | 0.8  | 0.6   | 0.9  |
| Rer1   | 100.7 | 84.2 | 74.1 | 95.4  | 85.7 | 87.3 | 89.4  | 75.2 | 85.8 | 91.7 | 95.9  | 98.3 |
| Rere   | 2.4   | 3.1  | 3.6  | 2.3   | 2.1  | 2.9  | 3.0   | 2.9  | 2.7  | 3.6  | 3.0   | 3.2  |
| Rerg   | 1.8   | 2.2  | 1.8  | 1.7   | 1.4  | 1.4  | 1.3   | 0.9  | 1.2  | 1.5  | 0.8   | 1.7  |
| Rest   | 13.0  | 11.4 | 13.3 | 12.9  | 13.1 | 13.2 | 13.6  | 13.1 | 12.0 | 14.6 | 15.0  | 14.5 |
| Ret    | 0.1   | 0.1  | 0.1  | 0.1   | 0.1  | 0.1  | 0.1   | 0.2  | 0.1  | 0.1  | 0.0   | 0.1  |
| Retsat | 6.6   | 6.9  | 6.5  | 9.0   | 7.4  | 8.5  | 6.5   | 6.0  | 5.9  | 7.3  | 5.3   | 6.3  |
| Rev1   | 5.6   | 6.1  | 5.8  | 4.5   | 5.1  | 4.8  | 4.9   | 5.8  | 5.1  | 5.8  | 4.9   | 5.4  |
| Rev3l  | 2.6   | 3.8  | 4.6  | 2.3   | 2.5  | 2.6  | 2.2   | 3.8  | 2.6  | 2.6  | 2.5   | 2.7  |
| Rex2   | 0.2   | 0.2  | 0.2  | 0.2   | 0.1  | 0.2  | 0.1   | 0.1  | 0.1  | 0.1  | 0.2   | 0.1  |
| Rexo1  | 2.1   | 2.4  | 3.0  | 2.2   | 2.5  | 2.3  | 2.9   | 2.9  | 2.8  | 2.7  | 2.4   | 2.2  |
| Rexo2  | 101.6 | 83.0 | 88.6 | 117.5 | 87.6 | 99.3 | 100.9 | 95.4 | 90.1 | 95.9 | 111.6 | 98.0 |
| Rexo4  | 11.9  | 11.8 | 12.5 | 12.5  | 11.6 | 11.3 | 12.8  | 13.1 | 10.4 | 12.1 | 12.6  | 12.1 |
| Rfc1   | 10.1  | 12.4 | 13.1 | 10.3  | 10.4 | 13.1 | 11.3  | 12.1 | 10.4 | 10.4 | 11.3  | 11.0 |
| Rfc2   | 12.6  | 13.8 | 14.5 | 11.8  | 13.8 | 11.1 | 13.7  | 12.5 | 12.0 | 10.8 | 12.4  | 10.8 |
| Rfc3   | 5.4   | 6.8  | 7.9  | 6.1   | 7.1  | 4.4  | 7.3   | 5.5  | 6.8  | 6.6  | 6.7   | 5.8  |
| Rfc4   | 4.8   | 5.2  | 5.4  | 3.1   | 5.7  | 3.7  | 4.4   | 3.9  | 5.5  | 3.7  | 3.9   | 2.7  |
| Rfc5   | 2.7   | 3.0  | 4.9  | 2.0   | 3.6  | 1.7  | 5.7   | 4.7  | 3.9  | 3.1  | 3.3   | 3.4  |
| Rfesd  | 6.2   | 4.8  | 3.8  | 5.6   | 4.1  | 6.8  | 4.1   | 3.8  | 4.6  | 5.9  | 5.9   | 6.3  |
| Rffl   | 2.3   | 2.7  | 3.2  | 1.9   | 2.3  | 1.9  | 2.7   | 3.1  | 2.9  | 2.9  | 2.2   | 2.9  |
| Rfk    | 23.7  | 18.1 | 15.3 | 27.0  | 18.3 | 27.1 | 15.7  | 14.3 | 14.4 | 18.1 | 19.0  | 18.1 |

Online Table 1

|        |      |      |      |      |      |      |      |      |      |      |      |      |
|--------|------|------|------|------|------|------|------|------|------|------|------|------|
| Rfng   | 2.2  | 3.0  | 2.7  | 2.3  | 2.2  | 2.7  | 2.5  | 2.0  | 2.4  | 2.2  | 2.4  | 2.2  |
| Rft1   | 9.7  | 8.5  | 9.6  | 9.8  | 8.5  | 9.3  | 7.8  | 8.0  | 8.7  | 8.3  | 9.3  | 9.6  |
| Rftn1  | 33.3 | 46.2 | 42.4 | 32.7 | 37.3 | 27.9 | 44.8 | 37.3 | 45.9 | 38.5 | 37.7 | 42.9 |
| Rftn2  | 4.2  | 3.3  | 3.5  | 6.5  | 3.4  | 5.0  | 3.9  | 4.4  | 3.8  | 2.9  | 4.2  | 4.5  |
| Rfwd2  | 31.6 | 27.9 | 24.3 | 28.3 | 25.3 | 31.2 | 22.9 | 23.9 | 25.1 | 25.8 | 30.5 | 26.1 |
| Rfwd3  | 8.2  | 9.6  | 9.5  | 7.8  | 9.3  | 7.7  | 8.1  | 8.0  | 8.4  | 7.9  | 8.4  | 7.6  |
| Rfx1   | 1.1  | 1.7  | 1.4  | 1.1  | 1.6  | 1.1  | 1.8  | 1.3  | 1.6  | 1.4  | 1.2  | 0.8  |
| Rfx2   | 0.2  | 0.1  | 0.2  | 0.0  | 0.1  | 0.1  | 0.1  | 0.1  | 0.1  | 0.1  | 0.1  | 0.1  |
| Rfx3   | 0.1  | 0.3  | 0.2  | 0.1  | 0.2  | 0.1  | 0.1  | 0.2  | 0.2  | 0.3  | 0.2  | 0.2  |
| Rfx5   | 4.2  | 5.0  | 7.1  | 5.0  | 5.2  | 5.1  | 5.0  | 5.0  | 5.1  | 4.8  | 4.2  | 4.6  |
| Rfx7   | 2.7  | 3.9  | 3.8  | 2.6  | 3.1  | 3.1  | 3.0  | 3.5  | 3.0  | 3.2  | 3.3  | 2.7  |
| Rfx8   | 0.0  | 0.1  | 0.0  | 0.1  | 0.0  | 0.0  | 0.0  | 0.0  | 0.0  | 0.0  | 0.0  | 0.0  |
| Rfxank | 1.2  | 1.6  | 1.7  | 1.2  | 1.4  | 1.6  | 1.2  | 1.6  | 1.3  | 1.2  | 1.1  | 1.4  |
| Rfxap  | 4.0  | 3.1  | 3.2  | 3.9  | 3.0  | 3.8  | 4.1  | 3.1  | 3.6  | 4.2  | 4.8  | 4.5  |
| Rgag1  | 0.1  | 0.1  | 0.1  | 0.1  | 0.0  | 0.1  | 0.1  | 0.1  | 0.0  | 0.0  | 0.0  | 0.1  |
| Rgag4  | 2.1  | 2.0  | 1.7  | 2.3  | 3.2  | 2.9  | 1.8  | 0.9  | 1.6  | 1.3  | 1.7  | 1.4  |
| Rgcc   | 0.7  | 2.8  | 5.6  | 0.3  | 0.7  | 0.2  | 1.2  | 4.2  | 3.3  | 2.2  | 1.5  | 2.3  |
| Rgl1   | 21.3 | 32.9 | 34.1 | 21.2 | 21.8 | 18.4 | 21.9 | 23.1 | 23.7 | 23.3 | 23.6 | 27.3 |
| Rgl2   | 7.1  | 6.4  | 5.2  | 8.1  | 8.1  | 6.5  | 6.2  | 5.2  | 6.0  | 5.3  | 5.1  | 4.5  |
| Rgl3   | 1.6  | 1.7  | 1.9  | 1.0  | 1.3  | 1.3  | 1.2  | 1.6  | 2.3  | 1.4  | 1.3  | 1.4  |
| Rgma   | 0.7  | 1.7  | 2.4  | 0.8  | 0.9  | 0.8  | 1.1  | 2.4  | 1.4  | 0.8  | 0.9  | 0.9  |
| Rgmb   | 4.4  | 5.6  | 5.5  | 4.5  | 4.5  | 5.8  | 5.5  | 5.5  | 5.6  | 6.4  | 4.8  | 5.4  |
| Rgn    | 0.1  | 0.1  | 0.0  | 0.0  | 0.0  | 0.1  | 0.0  | 0.0  | 0.1  | 0.2  | 0.1  | 0.2  |
| Rgp1   | 4.6  | 4.9  | 4.5  | 4.4  | 4.9  | 5.1  | 5.0  | 4.5  | 5.0  | 4.4  | 5.0  | 4.4  |
| Rgs1   | 0.4  | 0.0  | 0.1  | 5.8  | 8.4  | 0.1  | 1.4  | 0.2  | 0.3  | 1.5  | 0.3  | 0.8  |
| Rgs10  | 16.4 | 14.9 | 21.0 | 27.2 | 30.4 | 19.8 | 18.1 | 18.6 | 17.4 | 17.9 | 18.5 | 16.8 |
| Rgs11  | 0.5  | 0.3  | 0.4  | 0.7  | 0.7  | 0.4  | 0.7  | 0.3  | 0.7  | 0.9  | 0.5  | 0.4  |
| Rgs12  | 9.9  | 7.8  | 7.2  | 9.9  | 12.1 | 8.1  | 11.4 | 5.8  | 7.5  | 8.4  | 7.5  | 7.4  |
| Rgs14  | 0.1  | 0.0  | 0.0  | 0.6  | 1.8  | 0.0  | 0.1  | 0.0  | 0.0  | 0.1  | 0.0  | 0.1  |
| Rgs16  | 1.4  | 1.7  | 3.7  | 1.5  | 3.9  | 1.1  | 4.1  | 2.6  | 3.1  | 9.1  | 3.6  | 4.8  |
| Rgs17  | 0.3  | 0.6  | 0.7  | 0.4  | 0.7  | 0.4  | 0.5  | 0.4  | 0.8  | 0.3  | 0.4  | 0.6  |
| Rgs18  | 0.0  | 0.0  | 0.0  | 1.4  | 1.7  | 0.0  | 0.1  | 0.0  | 0.0  | 0.1  | 0.0  | 0.0  |
| Rgs19  | 11.9 | 9.6  | 10.6 | 13.8 | 15.4 | 11.3 | 12.4 | 13.3 | 12.0 | 11.3 | 12.9 | 10.1 |
| Rgs2   | 0.7  | 0.3  | 0.3  | 4.8  | 6.9  | 0.2  | 0.8  | 0.3  | 0.4  | 0.9  | 0.2  | 0.6  |
| Rgs20  | 0.0  | 0.0  | 0.1  | 0.1  | 0.1  | 0.2  | 0.4  | 0.0  | 0.0  | 0.0  | 0.2  | 0.1  |
| Rgs22  | 0.0  | 0.0  | 0.0  | 0.0  | 0.0  | 0.0  | 0.0  | 0.0  | 0.0  | 0.0  | 0.0  | 0.0  |
| Rgs3   | 11.9 | 10.2 | 12.6 | 12.4 | 15.3 | 8.6  | 11.8 | 10.4 | 10.6 | 8.1  | 8.5  | 9.9  |
| Rgs4   | 7.3  | 8.9  | 13.6 | 5.5  | 5.4  | 6.8  | 3.3  | 10.1 | 5.9  | 2.7  | 5.5  | 3.8  |
| Rgs5   | 0.6  | 0.6  | 0.8  | 0.9  | 0.9  | 0.1  | 0.2  | 0.6  | 0.5  | 0.4  | 0.6  | 0.5  |
| Rgs6   | 0.2  | 0.1  | 0.2  | 0.2  | 0.1  | 0.2  | 0.0  | 0.1  | 0.1  | 0.0  | 0.0  | 0.1  |
| Rgs7   | 0.0  | 0.1  | 0.1  | 0.0  | 0.0  | 0.0  | 0.0  | 0.0  | 0.0  | 0.0  | 0.0  | 0.0  |
| Rgs7bp | 0.0  | 0.0  | 0.0  | 0.0  | 0.0  | 0.0  | 0.0  | 0.0  | 0.0  | 0.0  | 0.0  | 0.0  |
| Rgs8   | 0.0  | 0.0  | 0.0  | 0.0  | 0.0  | 0.0  | 0.0  | 0.0  | 0.0  | 0.0  | 0.0  | 0.0  |
| Rgs9   | 0.3  | 0.3  | 0.2  | 0.3  | 0.4  | 0.3  | 0.3  | 0.2  | 0.2  | 0.1  | 0.2  | 0.1  |
| Rgs9bp | 0.0  | 0.0  | 0.0  | 0.0  | 0.0  | 0.0  | 0.0  | 0.0  | 0.0  | 0.0  | 0.0  | 0.0  |
| Rgs1   | 0.0  | 0.0  | 0.1  | 0.0  | 0.0  | 0.0  | 0.0  | 0.0  | 0.0  | 0.0  | 0.0  | 0.0  |
| Rhag   | 0.0  | 0.0  | 0.0  | 0.0  | 0.0  | 0.0  | 0.0  | 0.0  | 0.0  | 0.0  | 0.0  | 0.0  |
| Rhbdd1 | 24.4 | 17.8 | 14.1 | 26.8 | 15.6 | 25.2 | 18.3 | 19.2 | 15.9 | 14.9 | 19.3 | 14.6 |
| Rhbdd2 | 2.7  | 2.8  | 2.2  | 2.6  | 2.2  | 3.0  | 2.6  | 1.9  | 2.2  | 2.3  | 2.1  | 2.3  |
| Rhbdd3 | 4.1  | 3.6  | 2.6  | 3.4  | 3.2  | 4.3  | 3.2  | 2.9  | 4.3  | 3.3  | 2.9  | 3.4  |
| Rhbdf1 | 15.3 | 15.2 | 15.1 | 16.8 | 16.2 | 13.9 | 23.8 | 23.0 | 24.0 | 16.7 | 17.9 | 15.1 |
| Rhbdf2 | 4.9  | 5.1  | 5.0  | 4.0  | 6.7  | 3.8  | 3.7  | 3.5  | 2.5  | 4.1  | 3.8  | 3.2  |
| Rhbd1  | 2.8  | 4.1  | 3.5  | 2.0  | 1.8  | 2.6  | 1.8  | 1.9  | 2.3  | 3.9  | 2.6  | 2.6  |
| Rhbd2  | 0.5  | 0.3  | 0.8  | 0.4  | 0.8  | 0.4  | 0.2  | 0.1  | 0.2  | 0.2  | 0.2  | 0.2  |
| Rhbd3  | 0.4  | 0.5  | 0.7  | 0.2  | 0.3  | 0.5  | 0.4  | 0.7  | 0.5  | 1.0  | 0.7  | 0.9  |
| Rhd    | 0.2  | 0.1  | 0.1  | 0.1  | 0.2  | 0.1  | 0.2  | 0.1  | 0.1  | 0.1  | 0.0  | 0.0  |
| Rheb   | 51.2 | 42.8 | 40.5 | 57.4 | 47.6 | 49.6 | 46.8 | 37.1 | 47.9 | 53.4 | 51.2 | 51.4 |

Online Table 1

|         |       |       |       |       |       |       |       |       |       |       |       |       |
|---------|-------|-------|-------|-------|-------|-------|-------|-------|-------|-------|-------|-------|
| Rhebl1  | 0.7   | 1.0   | 0.9   | 1.0   | 0.9   | 1.1   | 0.5   | 0.7   | 1.3   | 0.9   | 0.9   | 0.8   |
| Rhno1   | 6.1   | 6.1   | 7.2   | 6.6   | 6.5   | 7.2   | 8.4   | 7.6   | 6.5   | 6.7   | 7.5   | 6.7   |
| Rho     | 0.1   | 0.1   | 0.0   | 0.0   | 0.0   | 0.1   | 0.0   | 0.1   | 0.1   | 0.1   | 0.1   | 0.1   |
| Rhoa    | 148.3 | 127.7 | 126.7 | 196.2 | 146.6 | 165.4 | 182.3 | 167.6 | 157.1 | 146.7 | 197.0 | 168.7 |
| Rhob    | 29.0  | 28.3  | 24.5  | 32.3  | 33.9  | 26.1  | 32.4  | 38.5  | 41.0  | 33.7  | 30.0  | 23.9  |
| Rhobtb1 | 1.9   | 3.1   | 4.9   | 1.7   | 1.5   | 1.7   | 1.3   | 3.0   | 1.9   | 1.7   | 1.5   | 2.0   |
| Rhobtb2 | 1.9   | 2.0   | 2.2   | 1.8   | 2.0   | 2.0   | 1.9   | 2.3   | 2.1   | 2.4   | 2.1   | 2.1   |
| Rhobtb3 | 16.3  | 16.4  | 14.1  | 15.2  | 10.3  | 19.2  | 11.6  | 14.1  | 15.9  | 11.6  | 15.0  | 13.4  |
| Rhoc    | 163.9 | 121.6 | 105.3 | 184.0 | 135.9 | 174.1 | 160.4 | 131.0 | 126.6 | 144.8 | 159.6 | 148.4 |
| Rhod    | 22.5  | 18.5  | 16.8  | 21.2  | 20.4  | 23.0  | 18.5  | 15.9  | 18.9  | 21.2  | 18.0  | 20.4  |
| Rhof    | 0.1   | 0.2   | 0.2   | 0.5   | 0.9   | 0.2   | 0.4   | 0.3   | 0.2   | 0.3   | 0.1   | 0.1   |
| Rhog    | 16.4  | 17.5  | 15.1  | 21.6  | 26.7  | 19.7  | 17.9  | 16.2  | 15.8  | 17.1  | 15.8  | 15.9  |
| Rhoh    | 0.0   | 0.0   | 0.0   | 0.1   | 0.1   | 0.0   | 0.0   | 0.0   | 0.0   | 0.0   | 0.0   | 0.0   |
| Rhoj    | 38.1  | 29.5  | 31.7  | 29.7  | 32.0  | 25.6  | 32.9  | 31.1  | 31.0  | 49.7  | 45.6  | 40.5  |
| Rhoq    | 44.1  | 41.8  | 40.7  | 50.0  | 45.5  | 50.1  | 41.5  | 43.7  | 41.5  | 37.7  | 45.1  | 46.3  |
| Rhot1   | 13.4  | 13.3  | 11.4  | 13.3  | 12.7  | 13.1  | 12.1  | 13.2  | 13.5  | 14.0  | 13.3  | 13.9  |
| Rhot2   | 5.1   | 5.5   | 5.2   | 5.8   | 4.8   | 6.0   | 4.6   | 4.0   | 5.1   | 4.7   | 4.8   | 4.0   |
| Rhou    | 9.6   | 11.8  | 16.7  | 7.2   | 9.2   | 8.4   | 9.5   | 17.2  | 15.7  | 17.6  | 14.4  | 15.7  |
| Rhov    | 0.1   | 0.0   | 0.1   | 0.5   | 0.4   | 0.1   | 0.0   | 0.0   | 0.0   | 0.1   | 0.0   | 0.0   |
| Rhox5   | 19.9  | 27.5  | 23.3  | 30.9  | 29.3  | 39.4  | 37.5  | 29.4  | 31.1  | 14.0  | 31.2  | 17.8  |
| Rhpn1   | 0.2   | 0.4   | 0.1   | 0.1   | 0.1   | 0.3   | 0.2   | 0.2   | 0.1   | 0.4   | 0.2   | 0.0   |
| Rhpn2   | 0.8   | 0.5   | 0.6   | 0.3   | 0.2   | 0.2   | 0.2   | 0.7   | 0.3   | 1.2   | 0.8   | 0.5   |
| Rian    | 31.4  | 26.6  | 25.4  | 32.6  | 27.3  | 32.8  | 42.3  | 43.3  | 56.4  | 55.3  | 65.6  | 41.9  |
| Ribc1   | 0.8   | 1.0   | 0.8   | 1.2   | 0.9   | 0.8   | 0.7   | 1.1   | 0.7   | 1.0   | 1.0   | 0.9   |
| Ribc2   | 0.1   | 0.1   | 0.1   | 0.0   | 0.0   | 0.2   | 0.0   | 0.1   | 0.0   | 0.0   | 0.1   | 0.1   |
| Ric3    | 1.8   | 0.8   | 0.8   | 1.9   | 0.7   | 1.7   | 1.2   | 0.8   | 0.5   | 0.4   | 0.5   | 0.4   |
| Ric8    | 24.4  | 19.6  | 15.9  | 25.2  | 19.8  | 24.2  | 21.5  | 20.7  | 20.9  | 21.2  | 21.6  | 19.6  |
| Ric8b   | 4.0   | 4.1   | 3.8   | 3.7   | 3.7   | 3.8   | 3.8   | 3.8   | 3.6   | 3.6   | 3.7   | 4.0   |
| Rictor  | 7.0   | 7.6   | 6.8   | 6.5   | 6.8   | 6.8   | 7.3   | 6.3   | 7.6   | 7.1   | 7.3   | 7.8   |
| Rif1    | 3.2   | 4.1   | 4.7   | 2.3   | 3.2   | 2.9   | 3.0   | 3.4   | 3.3   | 2.8   | 3.5   | 3.5   |
| Riiaad1 | 7.6   | 5.7   | 3.3   | 7.9   | 5.4   | 6.4   | 3.9   | 3.1   | 3.9   | 4.0   | 3.4   | 3.1   |
| Rilp    | 1.5   | 0.8   | 0.9   | 1.3   | 1.0   | 1.0   | 1.4   | 1.3   | 1.4   | 0.7   | 1.9   | 1.3   |
| Rilpl1  | 17.9  | 16.2  | 17.6  | 19.8  | 12.6  | 21.4  | 16.2  | 16.3  | 17.3  | 16.3  | 16.8  | 18.3  |
| Rilpl2  | 9.7   | 9.4   | 8.6   | 10.6  | 12.0  | 9.3   | 9.3   | 11.3  | 10.0  | 9.7   | 7.3   | 9.1   |
| Rimbp3  | 0.0   | 0.0   | 0.0   | 0.0   | 0.0   | 0.0   | 0.0   | 0.0   | 0.0   | 0.0   | 0.0   | 0.0   |
| Rimkla  | 0.0   | 0.0   | 0.0   | 0.0   | 0.0   | 0.0   | 0.0   | 0.0   | 0.0   | 0.0   | 0.0   | 0.0   |
| Rimklb  | 0.0   | 0.0   | 0.0   | 0.0   | 0.0   | 0.0   | 0.0   | 0.0   | 0.0   | 0.0   | 0.0   | 0.0   |
| Rims1   | 0.3   | 0.2   | 0.3   | 0.3   | 0.2   | 0.3   | 0.1   | 0.1   | 0.1   | 0.0   | 0.1   | 0.1   |
| Rims2   | 0.0   | 0.0   | 0.0   | 0.0   | 0.0   | 0.0   | 0.0   | 0.0   | 0.0   | 0.0   | 0.0   | 0.0   |
| Rims3   | 0.1   | 0.1   | 0.0   | 0.0   | 0.1   | 0.2   | 0.0   | 0.0   | 0.1   | 0.0   | 0.0   | 0.0   |
| Rims4   | 0.0   | 0.1   | 0.1   | 0.0   | 0.1   | 0.0   | 0.1   | 0.1   | 0.0   | 0.0   | 0.0   | 0.0   |
| Rin1    | 6.3   | 3.2   | 2.3   | 5.2   | 3.4   | 4.9   | 4.3   | 3.5   | 2.7   | 5.4   | 4.9   | 3.3   |
| Rin2    | 4.1   | 4.9   | 7.3   | 4.3   | 4.6   | 4.0   | 3.1   | 5.4   | 3.8   | 6.4   | 4.4   | 6.1   |
| Rin3    | 0.3   | 0.2   | 0.2   | 0.8   | 1.4   | 0.2   | 0.9   | 0.7   | 0.6   | 0.3   | 0.6   | 0.5   |
| Ring1   | 5.9   | 5.2   | 6.1   | 5.8   | 5.2   | 5.6   | 5.5   | 6.5   | 7.4   | 5.8   | 5.0   | 4.1   |
| Rinl    | 0.3   | 0.3   | 0.2   | 1.7   | 2.4   | 0.1   | 0.5   | 0.2   | 0.1   | 0.3   | 0.2   | 0.3   |
| Rint1   | 10.2  | 11.0  | 9.0   | 11.1  | 9.3   | 10.6  | 8.8   | 9.4   | 8.8   | 9.8   | 9.7   | 10.0  |
| Riok1   | 8.2   | 7.8   | 9.1   | 7.5   | 6.9   | 7.6   | 8.5   | 8.0   | 7.7   | 8.7   | 9.6   | 9.1   |
| Riok2   | 13.4  | 14.3  | 11.7  | 14.8  | 10.1  | 13.9  | 10.4  | 9.4   | 8.2   | 11.0  | 11.4  | 10.4  |
| Riok3   | 29.9  | 27.2  | 23.0  | 34.0  | 32.6  | 29.9  | 23.1  | 21.5  | 23.3  | 24.1  | 25.4  | 24.2  |
| Ripk1   | 15.0  | 13.7  | 15.0  | 16.0  | 15.0  | 13.6  | 15.3  | 16.1  | 14.8  | 14.0  | 16.5  | 17.8  |
| Ripk2   | 13.1  | 14.0  | 14.5  | 13.9  | 24.0  | 11.5  | 23.7  | 13.7  | 19.3  | 18.6  | 18.7  | 18.8  |
| Ripk3   | 12.7  | 12.6  | 9.2   | 12.8  | 14.0  | 12.8  | 14.2  | 8.5   | 11.5  | 16.1  | 13.0  | 11.8  |
| Ripk4   | 0.0   | 0.0   | 0.0   | 0.0   | 0.0   | 0.0   | 0.0   | 0.0   | 0.0   | 0.0   | 0.0   | 0.0   |
| Ripply3 | 0.1   | 0.3   | 0.2   | 0.1   | 0.1   | 0.0   | 0.1   | 0.1   | 0.1   | 0.0   | 0.0   | 0.0   |
| Rit1    | 18.3  | 15.9  | 15.3  | 22.4  | 16.7  | 20.2  | 19.2  | 15.8  | 17.7  | 18.2  | 18.9  | 17.7  |
| Rit2    | 0.0   | 0.0   | 0.0   | 0.0   | 0.0   | 0.0   | 0.0   | 0.0   | 0.0   | 0.0   | 0.0   | 0.0   |

Online Table 1

|          |         |         |         |        |         |        |        |         |         |         |        |        |
|----------|---------|---------|---------|--------|---------|--------|--------|---------|---------|---------|--------|--------|
| Rlf      | 7.1     | 7.8     | 7.2     | 6.3    | 7.2     | 7.0    | 6.6    | 7.0     | 8.2     | 7.2     | 7.6    | 8.5    |
| Rlim     | 16.0    | 17.2    | 17.8    | 19.0   | 18.3    | 17.2   | 16.4   | 19.2    | 16.5    | 18.6    | 20.3   | 20.1   |
| Rln1     | 0.2     | 0.5     | 0.5     | 0.1    | 0.4     | 0.3    | 0.0    | 0.1     | 0.1     | 0.0     | 0.3    | 0.0    |
| Rln3     | 0.2     | 0.0     | 0.0     | 0.6    | 0.2     | 0.0    | 0.0    | 0.1     | 0.1     | 0.0     | 0.0    | 0.1    |
| Rltpr    | 0.0     | 0.0     | 0.0     | 0.0    | 0.0     | 0.0    | 0.1    | 0.1     | 0.1     | 0.1     | 0.0    | 0.0    |
| Rmdn1    | 5.1     | 5.3     | 3.9     | 4.3    | 3.9     | 5.3    | 3.7    | 3.9     | 3.9     | 5.0     | 4.7    | 4.8    |
| Rmdn2    | 6.0     | 6.1     | 9.6     | 8.1    | 7.3     | 5.4    | 8.9    | 6.1     | 7.4     | 7.3     | 7.9    | 9.5    |
| Rmdn3    | 11.3    | 11.5    | 10.8    | 13.2   | 10.1    | 13.8   | 12.3   | 10.1    | 10.4    | 12.6    | 11.8   | 10.5   |
| Rmi1     | 4.3     | 4.9     | 5.1     | 5.8    | 6.2     | 4.5    | 4.2    | 5.0     | 5.1     | 5.2     | 5.2    | 5.4    |
| Rmi2     | 0.0     | 0.1     | 0.1     | 0.0    | 0.1     | 0.0    | 0.1    | 0.1     | 0.1     | 0.0     | 0.1    | 0.0    |
| Rmnd1    | 5.0     | 4.8     | 4.1     | 5.6    | 4.2     | 5.0    | 4.6    | 4.1     | 4.1     | 4.0     | 5.1    | 5.1    |
| Rmnd5a   | 10.9    | 12.6    | 12.6    | 10.3   | 12.1    | 11.3   | 9.9    | 12.0    | 13.4    | 11.3    | 12.4   | 12.4   |
| Rmnd5b   | 10.6    | 11.2    | 8.1     | 11.3   | 10.1    | 11.0   | 11.0   | 8.7     | 10.0    | 9.9     | 9.6    | 8.9    |
| Rmrp     | 13901.2 | 12873.3 | 13315.8 | 7095.6 | 13618.9 | 8687.1 | 9228.5 | 14497.7 | 21791.7 | 16337.5 | 7835.1 | 9254.6 |
| Rn4.5s   | 785.0   | 1010.3  | 1075.9  | 651.9  | 1659.5  | 692.1  | 868.7  | 1406.8  | 3124.0  | 1492.8  | 650.5  | 888.4  |
| Rn45s    | 12.1    | 18.1    | 14.5    | 20.3   | 18.2    | 16.1   | 13.5   | 23.7    | 48.6    | 31.2    | 20.5   | 13.8   |
| Rnase1   | 0.2     | 0.0     | 0.1     | 0.0    | 0.0     | 0.0    | 0.1    | 0.0     | 0.1     | 0.0     | 0.1    | 0.0    |
| Rnase10  | 0.6     | 0.8     | 1.2     | 0.6    | 0.6     | 0.4    | 0.4    | 0.4     | 0.6     | 0.7     | 0.7    | 0.5    |
| Rnase4   | 158.6   | 144.0   | 147.7   | 127.1  | 160.1   | 120.9  | 138.8  | 167.1   | 127.2   | 148.7   | 160.5  | 132.7  |
| Rnase6   | 0.1     | 0.0     | 0.0     | 1.1    | 1.9     | 0.0    | 0.1    | 0.1     | 0.1     | 0.0     | 0.0    | 0.2    |
| Rnaseh1  | 8.6     | 8.8     | 10.0    | 10.7   | 8.4     | 8.7    | 10.6   | 8.1     | 8.1     | 8.5     | 10.5   | 9.2    |
| Rnaseh2a | 4.4     | 4.4     | 5.3     | 4.3    | 4.0     | 4.0    | 5.0    | 5.8     | 4.8     | 5.5     | 4.8    | 5.0    |
| Rnaseh2b | 8.6     | 7.9     | 8.9     | 7.8    | 8.8     | 6.2    | 9.1    | 9.3     | 8.6     | 6.7     | 7.9    | 7.6    |
| Rnaseh2c | 23.9    | 27.8    | 20.5    | 21.5   | 25.6    | 25.0   | 20.3   | 20.4    | 25.1    | 25.8    | 19.5   | 20.4   |
| Rnasek   | 92.4    | 80.1    | 71.0    | 116.9  | 92.7    | 98.6   | 85.3   | 71.2    | 70.2    | 82.1    | 70.3   | 76.5   |
| Rnasek   | 2.0     | 2.0     | 3.3     | 3.1    | 2.2     | 2.5    | 1.5    | 1.7     | 1.6     | 2.2     | 2.2    | 2.3    |
| Rnaset2a | 41.0    | 37.4    | 35.9    | 67.8   | 54.0    | 48.2   | 44.2   | 38.2    | 32.7    | 36.7    | 38.4   | 41.4   |
| Rnaset2b | 27.4    | 18.7    | 18.4    | 32.8   | 25.6    | 25.1   | 22.5   | 19.1    | 17.9    | 19.9    | 19.3   | 20.4   |
| Rnd1     | 30.4    | 20.5    | 13.5    | 29.8   | 18.9    | 27.8   | 17.0   | 6.0     | 12.4    | 21.9    | 18.7   | 16.5   |
| Rnd2     | 5.7     | 8.2     | 5.3     | 5.9    | 4.2     | 6.6    | 5.5    | 5.9     | 4.6     | 3.8     | 4.4    | 4.8    |
| Rnd3     | 71.4    | 55.3    | 46.3    | 85.0   | 52.8    | 67.1   | 57.4   | 46.2    | 57.1    | 100.0   | 83.4   | 65.6   |
| Rnf10    | 29.6    | 29.8    | 24.8    | 29.7   | 25.5    | 31.8   | 28.8   | 26.2    | 27.5    | 24.3    | 26.2   | 23.6   |
| Rnf103   | 10.3    | 9.9     | 9.1     | 10.8   | 9.7     | 10.1   | 9.8    | 8.7     | 10.2    | 9.6     | 9.4    | 10.9   |
| Rnf11    | 66.7    | 62.3    | 54.4    | 86.6   | 63.5    | 79.9   | 62.1   | 52.8    | 57.9    | 59.2    | 73.2   | 66.6   |
| Rnf111   | 7.5     | 8.3     | 7.4     | 7.7    | 8.3     | 6.9    | 9.0    | 7.3     | 8.1     | 7.7     | 9.0    | 7.9    |
| Rnf112   | 0.1     | 0.0     | 0.1     | 0.0    | 0.1     | 0.0    | 0.0    | 0.2     | 0.1     | 0.1     | 0.2    | 0.1    |
| Rnf113a1 | 1.8     | 1.2     | 1.8     | 2.1    | 1.6     | 2.3    | 1.8    | 1.4     | 1.0     | 1.5     | 2.0    | 1.3    |
| Rnf113a2 | 7.1     | 8.3     | 8.3     | 6.8    | 7.9     | 7.2    | 8.6    | 7.1     | 6.9     | 9.1     | 9.1    | 10.8   |
| Rnf114   | 14.9    | 13.5    | 13.9    | 15.9   | 15.2    | 13.7   | 13.2   | 12.9    | 14.9    | 14.9    | 14.5   | 16.1   |
| Rnf115   | 11.3    | 11.3    | 13.2    | 14.6   | 16.6    | 12.3   | 11.7   | 12.6    | 11.7    | 14.2    | 13.9   | 16.3   |
| Rnf121   | 8.2     | 7.9     | 8.2     | 9.0    | 9.7     | 9.4    | 9.0    | 9.9     | 9.3     | 9.1     | 8.8    | 9.4    |
| Rnf122   | 1.2     | 1.4     | 1.6     | 1.2    | 1.2     | 1.3    | 1.1    | 1.5     | 1.3     | 1.8     | 1.2    | 1.5    |
| Rnf123   | 7.3     | 6.1     | 5.5     | 7.1    | 6.5     | 6.9    | 6.7    | 6.2     | 6.8     | 5.7     | 5.7    | 6.1    |
| Rnf125   | 0.7     | 1.1     | 1.5     | 0.7    | 0.9     | 1.2    | 1.3    | 1.6     | 1.0     | 1.0     | 1.0    | 1.7    |
| Rnf126   | 7.6     | 7.7     | 7.2     | 6.6    | 8.4     | 7.9    | 10.7   | 9.1     | 10.7    | 9.3     | 7.5    | 7.3    |
| Rnf128   | 3.5     | 0.8     | 0.6     | 9.4    | 13.4    | 2.2    | 2.4    | 0.9     | 1.7     | 5.7     | 5.1    | 4.0    |
| Rnf13    | 44.4    | 37.8    | 42.0    | 59.1   | 46.7    | 53.9   | 41.8   | 39.9    | 41.3    | 38.5    | 47.8   | 47.3   |
| Rnf130   | 36.7    | 35.9    | 30.9    | 45.8   | 41.9    | 43.5   | 29.6   | 27.2    | 27.8    | 30.4    | 30.0   | 34.4   |
| Rnf135   | 4.5     | 4.7     | 4.4     | 5.5    | 5.4     | 4.8    | 3.9    | 4.2     | 4.3     | 4.1     | 3.8    | 3.5    |
| Rnf138   | 3.8     | 4.2     | 4.3     | 3.4    | 3.2     | 4.3    | 3.1    | 3.5     | 3.7     | 4.6     | 4.2    | 3.9    |
| Rnf139   | 6.2     | 6.5     | 6.9     | 5.3    | 6.5     | 7.2    | 6.5    | 7.0     | 7.5     | 8.0     | 7.9    | 7.5    |
| Rnf14    | 33.9    | 31.3    | 26.9    | 32.3   | 29.1    | 32.3   | 28.0   | 24.2    | 29.4    | 26.8    | 28.2   | 26.9   |
| Rnf141   | 30.2    | 26.0    | 21.1    | 30.9   | 22.7    | 32.4   | 19.5   | 16.4    | 20.0    | 18.4    | 20.5   | 21.3   |
| Rnf144a  | 0.2     | 0.1     | 0.3     | 0.2    | 0.2     | 0.0    | 0.2    | 0.5     | 0.4     | 0.2     | 0.1    | 0.1    |
| Rnf144b  | 0.3     | 0.1     | 0.1     | 0.3    | 0.1     | 0.1    | 0.0    | 0.0     | 0.1     | 0.2     | 0.2    | 0.1    |
| Rnf145   | 17.9    | 12.7    | 12.2    | 14.8   | 16.2    | 13.4   | 20.3   | 14.5    | 17.7    | 16.9    | 20.4   | 16.0   |
| Rnf146   | 12.7    | 13.3    | 14.3    | 14.3   | 12.2    | 14.4   | 13.4   | 13.6    | 12.4    | 13.1    | 15.0   | 14.1   |

Online Table 1



|        |       |       |       |       |       |       |       |       |       |       |       |       |
|--------|-------|-------|-------|-------|-------|-------|-------|-------|-------|-------|-------|-------|
| Rnf149 | 23.9  | 19.8  | 19.1  | 34.0  | 33.8  | 23.0  | 23.6  | 17.6  | 18.3  | 28.8  | 23.5  | 26.6  |
| Rnf150 | 2.9   | 3.7   | 5.7   | 4.2   | 5.5   | 2.3   | 3.9   | 5.2   | 4.5   | 4.0   | 2.9   | 4.1   |
| Rnf151 | 0.0   | 0.0   | 0.1   | 0.1   | 0.0   | 0.1   | 0.0   | 0.0   | 0.1   | 0.1   | 0.0   | 0.0   |
| Rnf152 | 0.0   | 0.0   | 0.0   | 0.0   | 0.0   | 0.0   | 0.1   | 0.0   | 0.0   | 0.0   | 0.0   | 0.1   |
| Rnf157 | 1.0   | 1.5   | 1.4   | 1.6   | 1.1   | 1.9   | 1.1   | 0.9   | 0.9   | 0.9   | 1.1   | 1.1   |
| Rnf165 | 0.0   | 0.0   | 0.0   | 0.0   | 0.0   | 0.0   | 0.0   | 0.0   | 0.0   | 0.0   | 0.0   | 0.0   |
| Rnf166 | 16.4  | 16.2  | 16.5  | 17.5  | 15.5  | 20.4  | 15.8  | 15.2  | 15.3  | 15.9  | 16.3  | 13.3  |
| Rnf167 | 11.0  | 11.2  | 9.2   | 11.6  | 9.5   | 12.2  | 9.7   | 10.4  | 9.6   | 11.5  | 8.6   | 11.1  |
| Rnf168 | 6.1   | 5.9   | 6.9   | 6.7   | 6.3   | 5.9   | 6.6   | 6.3   | 6.0   | 6.1   | 7.6   | 6.9   |
| Rnf169 | 7.2   | 8.3   | 8.0   | 6.7   | 7.2   | 7.4   | 6.4   | 5.9   | 7.4   | 8.3   | 7.0   | 6.7   |
| Rnf17  | 1.1   | 1.0   | 1.1   | 0.8   | 0.9   | 1.6   | 0.8   | 0.9   | 0.8   | 1.0   | 1.1   | 0.8   |
| Rnf170 | 8.9   | 9.6   | 11.1  | 9.2   | 7.8   | 7.5   | 7.4   | 9.8   | 8.9   | 7.1   | 9.0   | 9.7   |
| Rnf180 | 0.1   | 0.0   | 0.0   | 0.4   | 0.6   | 0.0   | 0.1   | 0.0   | 0.0   | 0.1   | 0.0   | 0.1   |
| Rnf181 | 118.4 | 135.3 | 129.4 | 111.6 | 114.4 | 117.7 | 140.4 | 144.6 | 143.3 | 138.4 | 144.0 | 137.5 |
| Rnf182 | 0.2   | 0.2   | 0.2   | 0.1   | 0.2   | 0.4   | 0.1   | 0.1   | 0.1   | 0.1   | 0.2   | 0.1   |
| Rnf183 | 0.0   | 0.0   | 0.0   | 0.0   | 0.2   | 0.1   | 0.1   | 0.0   | 0.0   | 0.1   | 0.0   | 0.0   |
| Rnf185 | 9.9   | 7.8   | 7.5   | 9.8   | 7.7   | 9.7   | 7.8   | 7.7   | 7.5   | 9.1   | 9.0   | 9.0   |
| Rnf187 | 51.2  | 38.5  | 33.0  | 46.5  | 37.1  | 48.6  | 39.1  | 38.4  | 37.5  | 43.4  | 36.0  | 39.4  |
| Rnf19a | 13.3  | 13.2  | 13.2  | 13.7  | 14.2  | 11.5  | 14.6  | 15.0  | 15.4  | 15.0  | 15.9  | 15.2  |
| Rnf19b | 13.8  | 15.0  | 15.0  | 18.4  | 24.0  | 10.3  | 19.6  | 18.5  | 21.9  | 17.2  | 17.0  | 20.5  |
| Rnf2   | 9.6   | 12.2  | 15.8  | 10.4  | 10.0  | 9.8   | 10.9  | 12.2  | 12.1  | 12.2  | 14.2  | 14.8  |
| Rnf20  | 30.0  | 26.7  | 28.3  | 32.0  | 24.6  | 27.7  | 27.9  | 23.1  | 22.0  | 26.0  | 31.5  | 32.1  |
| Rnf207 | 0.4   | 0.4   | 0.6   | 0.4   | 0.2   | 0.7   | 0.2   | 0.3   | 0.3   | 0.3   | 0.3   | 0.5   |
| Rnf208 | 0.1   | 0.1   | 0.0   | 0.0   | 0.0   | 0.0   | 0.0   | 0.0   | 0.1   | 0.1   | 0.1   | 0.0   |
| Rnf214 | 9.7   | 11.2  | 12.6  | 11.6  | 9.3   | 10.3  | 11.8  | 10.5  | 10.1  | 9.2   | 11.0  | 12.0  |
| Rnf215 | 12.5  | 11.5  | 11.7  | 12.0  | 11.9  | 12.5  | 15.9  | 14.5  | 16.7  | 12.6  | 12.2  | 13.3  |
| Rnf216 | 7.2   | 8.8   | 8.6   | 7.1   | 7.7   | 7.5   | 8.4   | 8.2   | 7.5   | 8.3   | 8.2   | 7.7   |
| Rnf217 | 5.7   | 4.4   | 3.8   | 4.2   | 3.5   | 4.6   | 4.6   | 4.3   | 4.9   | 5.5   | 4.9   | 4.9   |
| Rnf219 | 3.2   | 3.1   | 3.3   | 2.4   | 3.1   | 2.6   | 3.3   | 3.2   | 3.0   | 2.9   | 2.9   | 3.2   |
| Rnf220 | 5.8   | 6.1   | 6.3   | 6.8   | 5.7   | 6.3   | 6.7   | 6.3   | 6.2   | 5.1   | 5.8   | 5.0   |
| Rnf222 | 0.0   | 0.0   | 0.0   | 0.0   | 0.0   | 0.0   | 0.0   | 0.0   | 0.0   | 0.0   | 0.0   | 0.0   |
| Rnf223 | 0.1   | 0.0   | 0.1   | 0.0   | 0.0   | 0.0   | 0.0   | 0.0   | 0.1   | 0.0   | 0.0   | 0.1   |
| Rnf24  | 2.3   | 2.3   | 1.9   | 2.6   | 2.4   | 2.6   | 1.9   | 1.7   | 1.6   | 2.0   | 2.2   | 1.5   |
| Rnf25  | 17.8  | 15.4  | 14.9  | 17.5  | 13.7  | 17.2  | 14.0  | 14.6  | 12.4  | 14.9  | 14.1  | 14.9  |
| Rnf26  | 9.4   | 10.1  | 9.3   | 8.0   | 9.7   | 10.5  | 11.3  | 9.9   | 9.4   | 7.9   | 7.8   | 8.1   |
| Rnf31  | 3.2   | 3.6   | 4.1   | 3.6   | 4.0   | 3.6   | 3.4   | 3.6   | 4.0   | 3.1   | 3.1   | 2.9   |
| Rnf32  | 0.5   | 0.6   | 0.7   | 0.9   | 0.1   | 0.6   | 0.1   | 0.3   | 0.2   | 0.3   | 0.2   | 0.2   |
| Rnf34  | 14.8  | 15.0  | 15.9  | 15.7  | 14.3  | 16.9  | 14.6  | 17.4  | 15.2  | 16.0  | 18.9  | 17.2  |
| Rnf38  | 3.0   | 3.4   | 3.6   | 4.3   | 3.7   | 3.8   | 3.8   | 3.4   | 3.1   | 2.8   | 3.4   | 3.0   |
| Rnf39  | 0.2   | 0.1   | 0.1   | 0.1   | 0.1   | 0.1   | 0.2   | 0.1   | 0.0   | 0.2   | 0.1   | 0.2   |
| Rnf4   | 36.1  | 35.6  | 32.8  | 36.3  | 34.3  | 32.5  | 36.7  | 40.2  | 40.8  | 36.1  | 40.7  | 37.6  |
| Rnf40  | 9.3   | 10.8  | 11.9  | 10.1  | 11.0  | 9.8   | 11.9  | 12.0  | 11.0  | 11.9  | 10.2  | 11.5  |
| Rnf41  | 11.8  | 11.0  | 9.1   | 12.0  | 11.3  | 11.8  | 11.1  | 10.3  | 11.6  | 11.5  | 11.6  | 11.0  |
| Rnf43  | 0.0   | 0.0   | 0.1   | 0.0   | 0.0   | 0.0   | 0.0   | 0.0   | 0.0   | 0.0   | 0.0   | 0.0   |
| Rnf44  | 3.7   | 4.7   | 4.7   | 3.8   | 4.7   | 4.3   | 5.1   | 4.3   | 5.2   | 4.1   | 4.4   | 3.3   |
| Rnf5   | 7.4   | 9.1   | 9.3   | 8.4   | 10.6  | 9.7   | 9.0   | 8.0   | 7.9   | 9.5   | 12.2  | 8.3   |
| Rnf6   | 25.4  | 28.1  | 30.5  | 27.5  | 26.0  | 24.8  | 25.8  | 27.6  | 27.3  | 24.3  | 30.7  | 28.8  |
| Rnf7   | 47.1  | 45.5  | 42.6  | 54.5  | 45.3  | 54.7  | 46.7  | 43.2  | 46.4  | 51.5  | 52.0  | 52.3  |
| Rnf8   | 8.8   | 8.9   | 7.4   | 6.8   | 6.9   | 8.3   | 7.5   | 7.0   | 7.4   | 8.2   | 7.9   | 7.1   |
| Rnft1  | 9.3   | 10.5  | 11.1  | 9.8   | 9.7   | 8.8   | 11.0  | 10.7  | 12.1  | 12.8  | 14.1  | 13.3  |
| Rnft2  | 0.6   | 0.7   | 0.5   | 0.4   | 0.4   | 0.9   | 0.4   | 0.7   | 0.4   | 0.5   | 0.5   | 0.4   |
| Rngtt  | 4.9   | 5.6   | 5.7   | 4.9   | 5.4   | 5.6   | 4.0   | 4.7   | 4.9   | 4.9   | 5.3   | 5.3   |
| Rnh1   | 67.6  | 51.4  | 38.7  | 73.4  | 67.2  | 57.4  | 52.0  | 55.4  | 57.1  | 59.1  | 54.7  | 51.7  |
| Rnls   | 1.5   | 1.1   | 1.0   | 1.0   | 1.2   | 0.8   | 1.4   | 1.0   | 0.9   | 1.0   | 1.2   | 1.0   |
| Rnmt   | 7.6   | 7.5   | 6.4   | 8.4   | 6.8   | 7.5   | 6.0   | 6.0   | 5.9   | 8.1   | 7.7   | 7.3   |
| Rnmt1  | 3.4   | 3.6   | 2.9   | 4.2   | 2.9   | 4.4   | 3.1   | 3.0   | 2.3   | 3.1   | 2.7   | 2.7   |
| Rnpc3  | 5.2   | 5.6   | 5.4   | 6.3   | 5.8   | 4.9   | 5.0   | 5.5   | 6.0   | 5.3   | 7.7   | 6.8   |

Online Table 1

|          |        |        |       |        |        |        |       |        |        |        |        |        |
|----------|--------|--------|-------|--------|--------|--------|-------|--------|--------|--------|--------|--------|
| Rnpep    | 14.8   | 13.9   | 12.0  | 16.1   | 17.9   | 13.7   | 13.8  | 13.2   | 12.1   | 15.5   | 13.0   | 12.5   |
| Rnpepl1  | 1.8    | 2.1    | 2.2   | 2.1    | 2.6    | 1.9    | 2.3   | 2.6    | 2.7    | 2.2    | 2.3    | 1.6    |
| Rnps1    | 30.7   | 32.5   | 30.5  | 32.0   | 30.0   | 32.2   | 36.5  | 32.8   | 29.9   | 28.6   | 34.5   | 28.4   |
| Rnu11    | 40.6   | 14.2   | 41.7  | 14.5   | 42.8   | 43.7   | 44.4  | 70.5   | 52.6   | 78.6   | 56.7   | 66.4   |
| Rnu12    | 214.5  | 261.0  | 685.4 | 193.7  | 319.8  | 167.8  | 212.9 | 367.6  | 491.1  | 255.2  | 204.1  | 463.4  |
| Rnu73b   | 441.8  | 1135.7 | 542.2 | 189.5  | 917.6  | 0.0    | 72.6  | 606.3  | 2156.2 | 1242.8 | 0.0    | 977.8  |
| Robo1    | 8.1    | 8.6    | 10.3  | 10.4   | 11.1   | 10.5   | 11.4  | 7.2    | 6.5    | 5.6    | 6.4    | 7.4    |
| Robo2    | 0.3    | 0.1    | 0.1   | 0.2    | 0.2    | 0.1    | 0.2   | 0.1    | 0.1    | 0.1    | 0.1    | 0.1    |
| Robo3    | 0.0    | 0.2    | 0.1   | 0.0    | 0.1    | 0.1    | 0.0   | 0.0    | 0.1    | 0.1    | 0.1    | 0.0    |
| Robo4    | 0.7    | 0.2    | 0.3   | 0.1    | 0.1    | 0.0    | 0.4   | 0.5    | 0.5    | 0.1    | 0.0    | 0.2    |
| Rock1    | 19.1   | 20.6   | 21.6  | 21.8   | 19.6   | 17.4   | 19.6  | 17.1   | 18.7   | 19.3   | 22.5   | 24.5   |
| Rock2    | 71.0   | 69.7   | 55.1  | 90.4   | 58.7   | 83.9   | 62.4  | 44.8   | 50.0   | 51.4   | 72.0   | 58.4   |
| Rogdi    | 5.4    | 4.9    | 6.0   | 4.2    | 3.9    | 5.2    | 3.2   | 5.2    | 3.7    | 3.6    | 3.3    | 3.5    |
| Rom1     | 5.5    | 6.2    | 4.9   | 5.2    | 5.9    | 4.8    | 5.0   | 4.0    | 4.7    | 4.5    | 5.4    | 5.3    |
| Romo1    | 99.0   | 92.1   | 80.8  | 90.0   | 91.7   | 101.2  | 78.6  | 90.2   | 101.1  | 98.6   | 87.4   | 93.0   |
| Ropn1l   | 4.6    | 4.2    | 2.4   | 4.1    | 3.2    | 4.5    | 2.4   | 3.5    | 3.1    | 3.2    | 3.2    | 3.3    |
| Ror1     | 1.4    | 2.1    | 2.8   | 1.0    | 1.8    | 1.0    | 2.1   | 4.8    | 3.1    | 4.9    | 3.7    | 4.7    |
| Ror2     | 0.9    | 1.5    | 1.6   | 0.9    | 1.2    | 1.1    | 3.0   | 1.8    | 2.2    | 2.1    | 1.7    | 1.9    |
| Rora     | 13.8   | 14.2   | 13.2  | 16.5   | 11.8   | 14.3   | 13.0  | 11.1   | 10.9   | 9.7    | 10.6   | 14.1   |
| Rorb     | 0.0    | 0.0    | 0.0   | 0.0    | 0.0    | 0.0    | 0.0   | 0.0    | 0.0    | 0.0    | 0.0    | 0.0    |
| Rorc     | 0.5    | 0.2    | 0.1   | 0.1    | 0.0    | 0.2    | 0.0   | 0.2    | 0.1    | 0.8    | 0.4    | 0.1    |
| Rp1      | 0.0    | 0.0    | 0.0   | 0.0    | 0.0    | 0.0    | 0.0   | 0.0    | 0.0    | 0.0    | 0.0    | 0.0    |
| Rp1l1    | 0.0    | 0.0    | 0.0   | 0.0    | 0.0    | 0.0    | 0.0   | 0.0    | 0.0    | 0.0    | 0.0    | 0.0    |
| Rp2h     | 7.0    | 7.3    | 7.5   | 8.5    | 7.4    | 8.4    | 5.2   | 5.7    | 5.6    | 6.1    | 7.2    | 6.8    |
| Rp9      | 26.6   | 23.4   | 23.3  | 28.5   | 20.0   | 26.6   | 22.1  | 23.2   | 18.0   | 20.5   | 24.4   | 25.2   |
| Rpa1     | 19.5   | 21.1   | 22.0  | 19.0   | 20.0   | 20.2   | 21.8  | 17.0   | 21.3   | 17.1   | 18.5   | 18.5   |
| Rpa2     | 4.9    | 5.7    | 7.2   | 3.1    | 7.3    | 3.9    | 6.9   | 5.8    | 5.9    | 5.0    | 6.4    | 4.5    |
| Rpa3     | 16.4   | 22.7   | 21.7  | 20.6   | 21.9   | 20.4   | 25.5  | 22.7   | 22.1   | 19.9   | 22.7   | 19.7   |
| Rpain    | 6.4    | 7.0    | 6.2   | 6.1    | 5.4    | 7.1    | 4.6   | 8.1    | 6.0    | 7.6    | 7.3    | 7.6    |
| Rpap1    | 3.3    | 4.1    | 3.8   | 2.9    | 3.0    | 3.0    | 4.1   | 3.7    | 4.0    | 2.7    | 3.0    | 2.7    |
| Rpap2    | 13.2   | 12.3   | 12.5  | 13.0   | 10.4   | 14.6   | 9.5   | 11.9   | 10.6   | 12.2   | 12.1   | 11.2   |
| Rpap3    | 12.5   | 13.5   | 13.4  | 12.7   | 11.1   | 12.8   | 11.7  | 11.7   | 9.8    | 11.8   | 13.0   | 12.4   |
| Rpe      | 19.1   | 17.2   | 19.5  | 21.1   | 20.0   | 20.7   | 18.3  | 17.0   | 15.3   | 18.4   | 21.9   | 23.2   |
| Rpf1     | 13.2   | 12.6   | 13.4  | 15.7   | 11.6   | 11.4   | 13.9  | 13.2   | 11.7   | 13.7   | 14.6   | 12.5   |
| Rpf2     | 10.8   | 8.7    | 7.8   | 11.5   | 8.7    | 9.7    | 8.4   | 8.0    | 7.2    | 9.6    | 9.2    | 10.1   |
| Rpgr     | 1.4    | 1.3    | 1.1   | 1.6    | 1.0    | 1.5    | 0.9   | 1.0    | 0.8    | 1.0    | 1.1    | 1.0    |
| Rpgrip1  | 0.1    | 0.1    | 0.2   | 0.1    | 0.1    | 0.1    | 0.1   | 0.1    | 0.1    | 0.1    | 0.1    | 0.1    |
| Rpgrip1l | 4.6    | 5.4    | 5.9   | 5.5    | 4.0    | 5.5    | 3.9   | 3.5    | 3.3    | 4.5    | 5.3    | 5.1    |
| Rph3a    | 0.0    | 0.1    | 0.0   | 0.2    | 0.0    | 0.1    | 0.0   | 0.0    | 0.0    | 0.0    | 0.0    | 0.0    |
| Rph3al   | 0.0    | 0.0    | 0.2   | 0.0    | 0.1    | 0.3    | 0.1   | 0.2    | 0.0    | 0.1    | 0.0    | 0.1    |
| Rpia     | 6.6    | 6.0    | 5.6   | 5.8    | 5.5    | 4.9    | 6.4   | 5.4    | 5.0    | 5.4    | 7.4    | 5.1    |
| Rpl10    | 1256.4 | 1003.7 | 912.8 | 1001.4 | 1006.3 | 1124.7 | 976.6 | 1143.4 | 1130.2 | 1197.2 | 1143.4 | 1107.3 |
| Rpl10a   | 438.6  | 348.5  | 354.8 | 331.1  | 347.1  | 335.2  | 338.7 | 507.4  | 383.1  | 444.8  | 475.6  | 396.5  |
| Rpl11    | 786.5  | 627.0  | 666.8 | 649.0  | 656.2  | 728.0  | 640.9 | 715.8  | 628.3  | 738.3  | 690.0  | 683.6  |
| Rpl12    | 1161.9 | 888.5  | 884.4 | 943.2  | 851.2  | 1017.9 | 838.8 | 1100.0 | 829.0  | 1046.1 | 1025.7 | 956.3  |
| Rpl13    | 767.2  | 627.8  | 545.4 | 531.3  | 605.4  | 627.7  | 551.6 | 715.8  | 685.4  | 741.7  | 633.8  | 614.8  |
| Rpl13a   | 1000.4 | 777.1  | 758.0 | 803.0  | 718.6  | 845.1  | 756.0 | 933.8  | 772.6  | 910.4  | 856.8  | 865.5  |
| Rpl14    | 493.5  | 372.9  | 374.5 | 434.5  | 372.5  | 472.0  | 374.0 | 473.4  | 354.2  | 435.0  | 504.9  | 440.4  |
| Rpl15    | 275.2  | 223.5  | 208.0 | 198.8  | 220.9  | 236.2  | 209.3 | 257.5  | 245.5  | 264.7  | 256.6  | 235.4  |
| Rpl17    | 937.6  | 745.9  | 919.4 | 842.8  | 713.4  | 891.4  | 826.8 | 949.9  | 695.3  | 858.4  | 1032.3 | 1032.0 |
| Rpl18    | 500.4  | 421.9  | 392.2 | 376.7  | 411.6  | 409.3  | 408.6 | 486.1  | 430.6  | 488.4  | 465.4  | 412.8  |
| Rpl18a   | 426.2  | 359.0  | 391.7 | 401.5  | 354.4  | 420.5  | 387.0 | 514.5  | 372.8  | 412.1  | 442.3  | 396.8  |
| Rpl19    | 1117.1 | 886.2  | 887.8 | 1017.6 | 869.1  | 1012.8 | 897.3 | 1055.8 | 832.6  | 1030.4 | 1100.3 | 1003.9 |
| Rpl21    | 334.5  | 263.8  | 310.8 | 297.0  | 240.1  | 312.2  | 287.7 | 336.4  | 247.2  | 295.1  | 363.3  | 353.9  |
| Rpl22    | 112.1  | 87.0   | 88.1  | 100.6  | 88.6   | 113.6  | 87.9  | 106.6  | 83.9   | 99.6   | 110.4  | 106.1  |
| Rpl22l1  | 47.1   | 46.6   | 47.4  | 19.0   | 38.5   | 23.1   | 18.6  | 46.0   | 43.5   | 53.0   | 34.7   | 34.8   |
| Rpl23    | 656.4  | 513.0  | 576.2 | 572.5  | 514.6  | 609.1  | 533.0 | 616.6  | 495.5  | 588.6  | 635.2  | 665.2  |

Online Table 1

|            |        |        |        |        |        |        |        |        |        |        |        |        |
|------------|--------|--------|--------|--------|--------|--------|--------|--------|--------|--------|--------|--------|
| Rpl23a     | 1537.8 | 1292.2 | 1349.2 | 1420.3 | 1137.8 | 1409.2 | 1266.2 | 1616.2 | 1187.1 | 1348.1 | 1594.7 | 1412.1 |
| Rpl24      | 668.0  | 544.8  | 522.1  | 501.4  | 470.6  | 546.8  | 477.1  | 552.0  | 471.1  | 562.2  | 590.4  | 564.4  |
| Rpl26      | 114.4  | 95.5   | 65.6   | 115.3  | 62.9   | 84.4   | 84.6   | 84.2   | 67.0   | 86.8   | 109.1  | 62.5   |
| Rpl27      | 358.2  | 318.8  | 272.4  | 268.4  | 286.7  | 331.0  | 258.4  | 321.4  | 302.7  | 328.3  | 317.9  | 289.4  |
| Rpl27a     | 547.9  | 445.0  | 468.4  | 446.2  | 428.8  | 516.5  | 463.8  | 578.1  | 472.5  | 540.4  | 547.1  | 555.2  |
| Rpl28      | 714.7  | 594.0  | 702.2  | 717.0  | 597.2  | 755.6  | 613.3  | 778.8  | 525.7  | 650.7  | 708.8  | 668.8  |
| Rpl29      | 410.9  | 351.4  | 368.0  | 353.2  | 346.5  | 361.8  | 334.5  | 477.7  | 343.6  | 362.3  | 433.5  | 361.7  |
| Rpl3       | 515.7  | 391.5  | 395.3  | 385.1  | 394.7  | 378.6  | 388.7  | 506.0  | 431.9  | 493.6  | 466.4  | 454.8  |
| Rpl30      | 25.6   | 19.1   | 19.6   | 17.8   | 32.5   | 22.7   | 14.6   | 16.8   | 16.9   | 30.7   | 13.9   | 12.4   |
| Rpl31      | 332.0  | 290.6  | 302.1  | 298.5  | 271.9  | 327.2  | 278.0  | 378.1  | 287.1  | 301.6  | 340.5  | 305.8  |
| Rpl31-ps12 | 21.9   | 16.5   | 16.5   | 14.8   | 17.5   | 17.0   | 14.9   | 19.4   | 18.4   | 18.8   | 14.1   | 19.8   |
| Rpl32      | 1221.8 | 975.7  | 994.2  | 1018.1 | 916.5  | 1155.2 | 922.5  | 1142.1 | 895.2  | 1046.5 | 1169.8 | 1010.2 |
| Rpl34      | 12.9   | 14.8   | 9.4    | 11.5   | 15.0   | 9.5    | 10.7   | 13.0   | 16.5   | 11.3   | 14.3   | 12.2   |
| Rpl34-ps1  | 734.6  | 639.6  | 579.1  | 531.0  | 618.3  | 678.6  | 533.7  | 717.7  | 666.3  | 716.9  | 648.2  | 619.0  |
| Rpl35      | 1312.6 | 999.2  | 1138.7 | 1257.2 | 1023.5 | 1370.1 | 1124.0 | 1393.8 | 962.5  | 1101.2 | 1315.1 | 1205.1 |
| Rpl35a     | 690.6  | 564.3  | 545.0  | 523.2  | 544.7  | 589.9  | 486.5  | 593.7  | 536.9  | 648.8  | 603.7  | 610.2  |
| Rpl36      | 606.3  | 499.2  | 432.2  | 479.5  | 495.9  | 531.9  | 460.7  | 520.5  | 490.4  | 584.4  | 490.6  | 499.1  |
| Rpl36a     | 519.0  | 396.6  | 414.3  | 427.8  | 409.6  | 468.5  | 395.0  | 512.8  | 392.0  | 472.4  | 491.2  | 455.2  |
| Rpl36al    | 259.3  | 194.7  | 191.6  | 246.5  | 220.2  | 261.4  | 243.7  | 245.5  | 208.4  | 246.7  | 300.2  | 275.5  |
| Rpl37      | 193.4  | 158.7  | 145.0  | 132.8  | 152.5  | 169.2  | 136.2  | 171.6  | 162.2  | 178.1  | 172.5  | 171.7  |
| Rpl37a     | 915.1  | 758.0  | 637.7  | 682.2  | 685.6  | 764.5  | 625.3  | 743.4  | 695.5  | 781.7  | 742.1  | 693.9  |
| Rpl38      | 1359.8 | 1068.6 | 880.5  | 1114.8 | 1015.5 | 1214.4 | 922.1  | 1099.6 | 1016.6 | 1197.6 | 1112.5 | 1002.6 |
| Rpl39      | 1403.3 | 1257.6 | 1090.9 | 937.5  | 1112.0 | 1201.3 | 887.5  | 1211.8 | 1192.1 | 1344.2 | 1113.7 | 1193.7 |
| Rpl39l     | 2.5    | 0.8    | 1.3    | 0.4    | 0.6    | 0.8    | 0.3    | 0.7    | 0.6    | 1.2    | 1.4    | 0.6    |
| Rpl3l      | 0.0    | 0.1    | 0.1    | 0.1    | 0.1    | 0.0    | 0.1    | 0.0    | 0.0    | 0.0    | 0.0    | 0.1    |
| Rpl4       | 780.1  | 580.8  | 626.2  | 672.6  | 596.6  | 731.7  | 628.8  | 746.6  | 572.1  | 681.4  | 738.7  | 697.0  |
| Rpl41      | 1855.5 | 1507.4 | 1491.4 | 1515.2 | 1338.2 | 1706.4 | 1351.4 | 1905.7 | 1447.2 | 1644.2 | 1639.7 | 1533.2 |
| Rpl5       | 399.5  | 302.0  | 307.4  | 338.2  | 300.5  | 351.0  | 303.1  | 369.0  | 300.6  | 353.4  | 398.0  | 371.6  |
| Rpl6       | 604.0  | 475.4  | 431.2  | 463.8  | 465.3  | 524.9  | 459.5  | 527.1  | 464.2  | 541.6  | 557.5  | 470.9  |
| Rpl7       | 1008.3 | 822.0  | 804.5  | 697.7  | 726.3  | 821.4  | 728.0  | 914.4  | 772.1  | 878.0  | 904.7  | 866.3  |
| Rpl7a      | 593.4  | 518.7  | 547.7  | 513.4  | 490.7  | 559.8  | 537.6  | 680.4  | 536.1  | 570.0  | 646.8  | 580.9  |
| Rpl7l1     | 23.9   | 23.0   | 21.9   | 24.6   | 21.3   | 24.0   | 22.2   | 23.6   | 20.7   | 22.9   | 23.4   | 22.2   |
| Rpl8       | 581.1  | 494.0  | 456.0  | 465.2  | 492.7  | 504.1  | 481.2  | 584.1  | 509.1  | 550.9  | 512.3  | 496.2  |
| Rpl9       | 944.2  | 883.8  | 755.8  | 592.5  | 720.5  | 717.7  | 604.6  | 728.8  | 804.7  | 856.0  | 735.6  | 796.1  |
| Rplp0      | 1246.1 | 1034.4 | 935.2  | 982.6  | 921.4  | 1174.2 | 941.3  | 1180.9 | 963.0  | 1077.3 | 1021.6 | 977.1  |
| Rplp1      | 2149.8 | 1644.2 | 1227.5 | 1874.6 | 1534.2 | 2165.5 | 1377.5 | 1726.3 | 1523.6 | 1661.1 | 1438.3 | 1297.3 |
| Rplp2      | 509.7  | 406.6  | 345.3  | 389.4  | 405.7  | 450.3  | 361.8  | 415.8  | 383.0  | 437.0  | 378.4  | 364.8  |
| Rplp2-ps1  | 7.6    | 7.0    | 3.6    | 5.0    | 5.4    | 4.2    | 3.6    | 3.9    | 6.0    | 5.5    | 4.4    | 3.1    |
| Rpn1       | 59.0   | 54.8   | 54.7   | 67.9   | 60.9   | 68.0   | 68.1   | 65.3   | 59.8   | 59.0   | 61.0   | 58.9   |
| Rpn2       | 169.2  | 157.7  | 153.0  | 177.1  | 155.6  | 183.2  | 157.8  | 153.8  | 151.8  | 135.9  | 143.0  | 141.4  |
| Rpp14      | 10.2   | 8.0    | 7.0    | 11.9   | 9.3    | 10.1   | 8.4    | 7.1    | 8.3    | 9.6    | 8.9    | 7.8    |
| Rpp21      | 12.4   | 10.2   | 9.3    | 13.1   | 12.2   | 14.9   | 13.5   | 11.5   | 10.9   | 11.4   | 10.4   | 8.3    |
| Rpp25      | 0.2    | 0.0    | 0.3    | 0.1    | 0.2    | 0.2    | 0.3    | 0.7    | 0.3    | 0.4    | 0.4    | 0.4    |
| Rpp25l     | 9.7    | 8.1    | 7.1    | 6.9    | 8.8    | 9.2    | 7.6    | 10.5   | 9.4    | 11.0   | 9.1    | 9.2    |
| Rpp30      | 9.1    | 9.6    | 9.3    | 11.5   | 8.3    | 10.8   | 9.1    | 8.0    | 9.3    | 8.5    | 10.7   | 9.7    |
| Rpp38      | 6.8    | 5.6    | 5.2    | 6.6    | 6.1    | 6.4    | 5.7    | 5.4    | 4.7    | 5.4    | 6.5    | 6.3    |
| Rpp40      | 1.4    | 1.8    | 1.6    | 1.5    | 1.5    | 1.7    | 1.4    | 1.5    | 1.3    | 1.5    | 1.5    | 1.3    |
| Rpph1      | 7669.1 | 6363.4 | 7262.8 | 6999.4 | 8444.7 | 7602.4 | 6792.8 | 8908.7 | 7670.9 | 7687.2 | 6646.2 | 5615.8 |
| Rprd1a     | 8.6    | 9.1    | 8.9    | 8.1    | 7.3    | 7.6    | 7.4    | 7.5    | 10.3   | 9.6    | 9.4    | 11.0   |
| Rprd1b     | 3.8    | 5.1    | 5.8    | 3.9    | 4.2    | 3.9    | 4.9    | 4.8    | 4.5    | 4.2    | 4.7    | 4.2    |
| Rprd2      | 3.1    | 3.5    | 4.1    | 3.1    | 3.5    | 3.4    | 3.4    | 3.5    | 3.2    | 3.3    | 3.1    | 3.3    |
| Rprl1      | 1.9    | 0.3    | 0.6    | 0.0    | 1.0    | 0.1    | 1.3    | 0.3    | 1.5    | 0.6    | 0.2    | 0.5    |
| Rprl2      | 0.5    | 0.9    | 0.3    | 1.4    | 0.3    | 0.1    | 0.0    | 1.0    | 0.2    | 0.5    | 1.6    | 1.2    |
| Rprl3      | 3.2    | 2.6    | 0.8    | 2.0    | 0.8    | 0.6    | 4.2    | 6.6    | 0.8    | 1.2    | 2.7    | 0.0    |
| Rprm       | 2.6    | 1.1    | 0.6    | 1.5    | 1.1    | 1.5    | 1.4    | 0.3    | 0.9    | 0.7    | 0.9    | 1.1    |
| Rps10      | 783.9  | 629.7  | 609.7  | 693.9  | 638.7  | 769.2  | 649.8  | 764.2  | 653.7  | 729.8  | 702.0  | 633.5  |
| Rps11      | 802.8  | 606.8  | 613.0  | 672.5  | 600.8  | 669.8  | 644.8  | 753.6  | 633.8  | 695.0  | 705.4  | 653.0  |

Online Table 1

|            |        |        |        |        |        |        |        |        |        |        |        |        |
|------------|--------|--------|--------|--------|--------|--------|--------|--------|--------|--------|--------|--------|
| Rps12      | 1943.4 | 1550.4 | 1603.5 | 1658.3 | 1395.9 | 1833.4 | 1515.7 | 1985.6 | 1484.9 | 1568.7 | 1740.3 | 1664.1 |
| Rps13      | 503.6  | 420.7  | 336.6  | 345.5  | 413.4  | 429.0  | 319.3  | 400.7  | 433.6  | 471.8  | 407.2  | 397.7  |
| Rps14      | 671.2  | 556.9  | 464.2  | 421.9  | 510.7  | 544.7  | 422.3  | 580.1  | 565.4  | 616.2  | 514.3  | 479.3  |
| Rps15      | 918.7  | 825.5  | 834.8  | 789.7  | 722.5  | 883.4  | 776.2  | 965.4  | 770.8  | 861.1  | 840.9  | 775.5  |
| Rps15a     | 53.3   | 44.9   | 39.5   | 33.0   | 39.1   | 39.8   | 32.3   | 42.2   | 41.9   | 47.2   | 43.5   | 45.4   |
| Rps15a-ps4 | 1.5    | 1.6    | 1.1    | 1.0    | 1.4    | 0.9    | 1.1    | 1.4    | 1.3    | 2.1    | 0.8    | 1.1    |
| Rps15a-ps6 | 5.5    | 3.8    | 4.2    | 3.8    | 4.0    | 3.8    | 3.3    | 4.9    | 4.2    | 4.5    | 4.6    | 4.1    |
| Rps16      | 559.4  | 548.7  | 580.6  | 495.2  | 537.2  | 564.9  | 582.6  | 761.3  | 591.5  | 585.4  | 611.2  | 589.6  |
| Rps17      | 1005.2 | 820.9  | 760.6  | 723.3  | 714.7  | 811.8  | 704.4  | 817.6  | 756.3  | 886.2  | 866.4  | 771.2  |
| Rps18      | 1221.8 | 992.4  | 887.0  | 838.0  | 880.2  | 942.6  | 813.2  | 1046.2 | 883.3  | 1013.5 | 1057.8 | 951.0  |
| Rps19      | 789.9  | 711.6  | 608.3  | 543.5  | 637.0  | 662.4  | 565.9  | 695.7  | 660.7  | 732.3  | 644.8  | 602.3  |
| Rps19bp1   | 13.9   | 10.5   | 9.1    | 12.0   | 11.8   | 12.6   | 11.3   | 10.3   | 12.2   | 13.9   | 11.8   | 11.9   |
| Rps19-ps3  | 5.6    | 5.0    | 4.0    | 5.9    | 5.2    | 5.7    | 4.9    | 5.0    | 4.9    | 4.9    | 5.3    | 4.7    |
| Rps2       | 1333.4 | 1101.2 | 939.1  | 933.2  | 959.4  | 1016.2 | 1012.1 | 1247.8 | 1046.3 | 1154.4 | 1150.9 | 1041.5 |
| Rps20      | 1511.5 | 1164.2 | 973.3  | 1010.5 | 1060.2 | 1180.0 | 938.3  | 1147.8 | 1219.8 | 1210.5 | 1047.2 | 1057.4 |
| Rps21      | 902.8  | 706.6  | 618.5  | 644.9  | 670.8  | 835.2  | 593.3  | 641.7  | 711.7  | 878.6  | 587.7  | 666.7  |
| Rps23      | 437.2  | 368.0  | 376.2  | 392.1  | 373.8  | 443.4  | 362.0  | 464.4  | 379.8  | 436.3  | 460.5  | 425.4  |
| Rps24      | 1005.7 | 812.9  | 943.6  | 941.4  | 731.0  | 957.6  | 762.4  | 1082.0 | 673.6  | 810.0  | 1076.8 | 923.3  |
| Rps25      | 647.2  | 507.7  | 505.8  | 517.7  | 497.1  | 550.2  | 462.5  | 610.6  | 459.5  | 550.0  | 609.8  | 572.4  |
| Rps26      | 815.2  | 645.9  | 697.7  | 746.3  | 666.2  | 809.1  | 716.7  | 889.8  | 660.0  | 774.0  | 877.6  | 812.8  |
| Rps27      | 5.8    | 4.5    | 3.5    | 7.2    | 4.4    | 5.2    | 5.1    | 6.1    | 2.6    | 43.8   | 5.1    | 6.2    |
| Rps27a     | 636.0  | 508.9  | 456.6  | 469.5  | 542.0  | 562.7  | 425.1  | 532.0  | 512.4  | 622.3  | 545.7  | 587.2  |
| Rps27l     | 283.9  | 229.2  | 195.5  | 231.3  | 224.0  | 246.9  | 199.4  | 206.8  | 216.0  | 268.2  | 277.2  | 236.9  |
| Rps28      | 904.8  | 761.1  | 625.0  | 679.8  | 726.3  | 842.8  | 612.3  | 800.1  | 748.1  | 881.9  | 698.6  | 616.2  |
| Rps29      | 1065.1 | 946.7  | 744.7  | 761.9  | 959.4  | 990.4  | 703.1  | 948.9  | 1036.0 | 1074.5 | 798.1  | 796.2  |
| Rps3       | 377.9  | 304.3  | 287.2  | 305.3  | 302.8  | 339.8  | 269.6  | 330.2  | 281.4  | 328.4  | 318.2  | 298.9  |
| Rps3a1     | 1121.1 | 928.2  | 952.6  | 842.3  | 839.4  | 946.1  | 853.3  | 1016.2 | 877.2  | 985.4  | 1054.8 | 1035.4 |
| Rps4x      | 969.6  | 758.6  | 708.5  | 647.7  | 685.1  | 781.4  | 639.6  | 858.8  | 744.4  | 786.1  | 797.5  | 742.9  |
| Rps4y2     | 27.6   | 30.2   | 29.5   | 33.7   | 28.5   | 28.9   | 36.6   | 35.8   | 29.1   | 30.7   | 36.0   | 30.1   |
| Rps5       | 721.4  | 590.9  | 510.6  | 553.8  | 563.3  | 632.0  | 516.4  | 704.8  | 550.6  | 590.4  | 595.8  | 514.8  |
| Rps6       | 547.1  | 430.0  | 449.7  | 489.5  | 407.7  | 510.4  | 444.2  | 520.1  | 392.0  | 457.6  | 556.7  | 513.6  |
| Rps6ka1    | 1.1    | 0.8    | 1.2    | 4.9    | 8.1    | 0.8    | 1.5    | 0.7    | 0.7    | 1.2    | 0.8    | 1.0    |
| Rps6ka2    | 3.7    | 3.7    | 3.4    | 3.9    | 4.2    | 3.9    | 3.9    | 3.9    | 4.2    | 3.1    | 3.4    | 3.0    |
| Rps6ka3    | 3.7    | 3.7    | 3.6    | 3.7    | 5.0    | 2.9    | 3.5    | 4.2    | 3.8    | 4.8    | 3.4    | 4.0    |
| Rps6ka4    | 17.3   | 16.8   | 16.5   | 18.7   | 18.0   | 16.4   | 21.1   | 20.6   | 19.7   | 16.9   | 17.1   | 16.8   |
| Rps6ka5    | 1.3    | 1.0    | 1.5    | 1.0    | 1.2    | 0.9    | 1.2    | 1.3    | 1.3    | 1.4    | 1.6    | 1.0    |
| Rps6ka6    | 0.0    | 0.0    | 0.0    | 0.0    | 0.0    | 0.0    | 0.1    | 0.1    | 0.0    | 0.0    | 0.1    | 0.1    |
| Rps6kb1    | 10.5   | 9.8    | 13.6   | 11.0   | 10.3   | 9.3    | 12.7   | 12.5   | 11.6   | 10.9   | 12.8   | 13.4   |
| Rps6kb2    | 3.5    | 3.9    | 2.8    | 3.3    | 2.9    | 2.3    | 4.2    | 3.1    | 3.8    | 3.6    | 3.4    | 3.6    |
| Rps6kc1    | 14.1   | 13.4   | 12.5   | 15.6   | 12.1   | 15.1   | 14.9   | 11.7   | 12.4   | 12.4   | 13.3   | 13.4   |
| Rps6kl1    | 0.0    | 0.0    | 0.0    | 0.1    | 0.0    | 0.0    | 0.0    | 0.0    | 0.1    | 0.0    | 0.0    | 0.0    |
| Rps7       | 624.7  | 508.3  | 503.0  | 466.2  | 473.1  | 534.0  | 456.0  | 577.7  | 508.0  | 581.5  | 553.7  | 532.5  |
| Rps8       | 915.2  | 799.8  | 699.2  | 637.4  | 755.4  | 783.6  | 691.9  | 897.2  | 863.0  | 887.1  | 795.0  | 767.5  |
| Rps9       | 775.3  | 581.8  | 559.6  | 638.5  | 635.7  | 691.0  | 624.3  | 719.3  | 612.1  | 693.7  | 650.9  | 624.8  |
| Rpsa       | 667.4  | 614.1  | 589.8  | 583.4  | 553.0  | 631.0  | 587.5  | 739.0  | 576.6  | 574.3  | 599.1  | 544.3  |
| Rptor      | 4.5    | 4.6    | 4.4    | 5.2    | 4.7    | 4.4    | 5.3    | 4.6    | 4.7    | 3.9    | 4.2    | 3.7    |
| Rpusd1     | 3.3    | 3.2    | 3.6    | 4.1    | 3.0    | 3.4    | 2.7    | 3.5    | 3.1    | 3.6    | 2.8    | 2.6    |
| Rpusd2     | 0.4    | 0.4    | 0.5    | 0.5    | 0.6    | 0.6    | 0.5    | 0.4    | 0.4    | 0.3    | 0.4    | 0.3    |
| Rpusd3     | 3.3    | 2.9    | 2.0    | 2.2    | 2.1    | 3.4    | 3.2    | 2.6    | 2.1    | 1.9    | 2.1    | 2.4    |
| Rpusd4     | 5.6    | 5.1    | 4.5    | 5.5    | 5.0    | 5.2    | 5.3    | 4.6    | 5.3    | 4.8    | 4.7    | 4.3    |
| Rqcd1      | 8.2    | 8.5    | 7.9    | 8.5    | 9.1    | 8.2    | 8.4    | 8.6    | 8.5    | 7.6    | 8.2    | 6.0    |
| Rrad       | 0.7    | 0.6    | 0.7    | 1.8    | 1.9    | 0.7    | 1.0    | 1.9    | 0.9    | 0.9    | 0.6    | 0.9    |
| Rraga      | 20.8   | 17.3   | 19.9   | 19.9   | 23.4   | 18.8   | 17.5   | 21.2   | 21.2   | 20.3   | 20.3   | 21.1   |
| Rragb      | 0.5    | 0.3    | 0.3    | 0.3    | 0.1    | 0.5    | 0.2    | 0.2    | 0.0    | 0.4    | 0.3    | 0.3    |
| Rragc      | 38.8   | 34.0   | 30.5   | 42.1   | 38.2   | 40.0   | 35.2   | 30.9   | 33.4   | 32.3   | 36.9   | 37.3   |
| Rragd      | 5.9    | 2.6    | 1.2    | 7.1    | 1.9    | 10.8   | 0.7    | 0.7    | 0.7    | 0.9    | 0.8    | 1.0    |
| Rras       | 53.3   | 62.2   | 69.9   | 73.2   | 65.1   | 75.5   | 85.7   | 75.9   | 69.6   | 53.0   | 76.9   | 70.2   |

Online Table 1

|          |       |      |      |       |       |       |       |      |      |       |       |       |
|----------|-------|------|------|-------|-------|-------|-------|------|------|-------|-------|-------|
| Rras2    | 108.7 | 96.3 | 75.1 | 89.1  | 67.8  | 77.3  | 103.9 | 94.2 | 98.9 | 113.8 | 140.5 | 105.7 |
| Rrbp1    | 80.5  | 77.3 | 96.1 | 93.6  | 79.5  | 86.4  | 105.3 | 97.6 | 82.5 | 77.4  | 93.7  | 103.0 |
| Rreb1    | 1.1   | 1.4  | 1.6  | 1.1   | 1.7   | 1.1   | 1.4   | 1.5  | 1.4  | 1.5   | 1.3   | 1.3   |
| Rrm1     | 49.7  | 61.0 | 56.4 | 47.8  | 49.0  | 57.7  | 59.7  | 55.6 | 50.1 | 72.8  | 75.9  | 60.9  |
| Rrm2     | 14.2  | 18.7 | 22.6 | 7.1   | 27.4  | 6.9   | 32.0  | 11.9 | 20.1 | 11.7  | 17.9  | 10.9  |
| Rrm2b    | 10.1  | 9.4  | 10.1 | 13.2  | 8.4   | 12.0  | 9.1   | 7.8  | 7.8  | 8.4   | 11.4  | 11.0  |
| Rrn3     | 27.6  | 25.9 | 24.3 | 28.3  | 25.1  | 26.7  | 24.7  | 21.9 | 23.9 | 25.2  | 25.9  | 25.9  |
| Rrnad1   | 4.6   | 5.1  | 4.6  | 3.8   | 4.6   | 4.8   | 4.4   | 4.7  | 5.1  | 5.4   | 4.6   | 4.8   |
| Rrp1     | 57.7  | 52.2 | 53.2 | 69.4  | 51.9  | 61.8  | 58.6  | 55.2 | 47.3 | 57.1  | 59.0  | 60.1  |
| Rrp12    | 4.4   | 3.0  | 2.3  | 4.8   | 3.6   | 3.7   | 3.1   | 2.7  | 2.2  | 3.4   | 3.6   | 2.7   |
| Rrp15    | 15.9  | 13.5 | 11.8 | 19.1  | 12.6  | 14.8  | 17.0  | 13.3 | 13.3 | 12.9  | 14.8  | 12.5  |
| Rrp1b    | 1.9   | 2.0  | 2.0  | 1.9   | 2.1   | 2.0   | 2.0   | 2.1  | 1.9  | 1.7   | 1.8   | 1.8   |
| Rrp36    | 17.3  | 15.0 | 12.9 | 17.9  | 15.7  | 15.2  | 16.7  | 15.5 | 14.4 | 16.8  | 17.0  | 14.3  |
| Rrp7a    | 32.5  | 28.6 | 28.0 | 36.0  | 31.8  | 31.3  | 37.2  | 34.9 | 32.1 | 32.1  | 36.8  | 30.6  |
| Rrp8     | 6.7   | 6.2  | 4.9  | 6.9   | 5.2   | 5.7   | 5.0   | 5.2  | 5.3  | 6.5   | 6.6   | 6.0   |
| Rrp9     | 14.4  | 13.6 | 10.0 | 15.1  | 12.7  | 12.5  | 15.6  | 11.3 | 11.4 | 12.6  | 14.6  | 11.9  |
| Rrs1     | 7.6   | 7.7  | 7.4  | 8.0   | 7.1   | 8.2   | 8.9   | 7.3  | 7.9  | 10.2  | 7.8   | 9.5   |
| Rs1      | 0.0   | 0.0  | 0.0  | 0.0   | 0.0   | 0.0   | 0.0   | 0.0  | 0.0  | 0.0   | 0.0   | 0.0   |
| Rsad1    | 1.1   | 1.2  | 0.9  | 1.0   | 0.8   | 1.5   | 0.6   | 1.0  | 0.8  | 0.6   | 0.6   | 0.7   |
| Rsad2    | 2.0   | 0.2  | 0.3  | 2.4   | 0.3   | 0.8   | 0.2   | 0.1  | 0.1  | 0.1   | 0.2   | 0.6   |
| Rsb1     | 1.3   | 1.6  | 1.5  | 1.3   | 1.7   | 1.6   | 1.7   | 1.4  | 1.6  | 2.0   | 1.8   | 1.9   |
| Rsb1l    | 1.4   | 1.7  | 1.9  | 2.1   | 2.1   | 1.9   | 1.6   | 1.7  | 1.4  | 1.6   | 1.8   | 2.1   |
| Rsc1a1   | 0.0   | 2.0  | 0.5  | 0.0   | 0.0   | 0.0   | 0.0   | 0.4  | 0.0  | 0.0   | 0.4   | 0.0   |
| Rsf1     | 3.7   | 4.2  | 5.2  | 4.2   | 3.7   | 4.0   | 3.9   | 4.1  | 3.5  | 4.8   | 4.9   | 4.8   |
| Rsg1     | 0.3   | 0.5  | 0.5  | 0.2   | 0.8   | 0.4   | 0.6   | 0.5  | 0.7  | 0.5   | 0.6   | 0.5   |
| Rsl1     | 2.7   | 2.5  | 2.7  | 3.3   | 3.2   | 2.0   | 2.0   | 2.1  | 2.2  | 2.3   | 1.9   | 2.1   |
| Rsl1d1   | 49.9  | 44.2 | 38.7 | 49.1  | 42.6  | 42.5  | 40.9  | 38.3 | 36.3 | 53.8  | 51.2  | 46.7  |
| Rsl24d1  | 23.4  | 19.7 | 18.5 | 25.2  | 22.3  | 22.6  | 20.3  | 18.4 | 17.9 | 23.6  | 22.3  | 19.7  |
| Rslcan18 | 1.1   | 1.1  | 1.2  | 1.0   | 0.9   | 1.4   | 1.0   | 1.1  | 1.0  | 1.2   | 1.0   | 0.8   |
| Rsph1    | 2.2   | 2.3  | 2.5  | 3.5   | 1.9   | 3.5   | 1.6   | 1.2  | 1.4  | 1.9   | 3.1   | 2.5   |
| Rsph3a   | 19.9  | 17.0 | 15.8 | 21.5  | 13.9  | 22.4  | 15.2  | 14.6 | 11.9 | 15.3  | 17.3  | 16.5  |
| Rsph3b   | 21.5  | 18.4 | 17.1 | 23.6  | 15.1  | 24.4  | 16.3  | 15.0 | 12.8 | 16.2  | 17.8  | 16.9  |
| Rsph4a   | 0.0   | 0.0  | 0.0  | 0.0   | 0.0   | 0.1   | 0.0   | 0.0  | 0.0  | 0.0   | 0.0   | 0.0   |
| Rsph6a   | 0.1   | 0.0  | 0.0  | 0.0   | 0.0   | 0.0   | 0.0   | 0.0  | 0.0  | 0.0   | 0.1   | 0.0   |
| Rsph9    | 4.0   | 4.0  | 3.2  | 3.1   | 2.7   | 5.3   | 3.3   | 4.6  | 3.3  | 4.1   | 2.8   | 3.1   |
| Rspo1    | 0.4   | 1.0  | 2.2  | 0.4   | 0.1   | 0.2   | 0.6   | 2.6  | 3.5  | 33.7  | 13.2  | 7.7   |
| Rspo2    | 0.0   | 0.0  | 0.0  | 0.0   | 0.0   | 0.0   | 0.0   | 0.0  | 0.0  | 0.1   | 0.2   | 0.0   |
| Rspo3    | 2.3   | 1.5  | 1.7  | 0.9   | 0.3   | 0.3   | 0.7   | 1.4  | 1.6  | 15.2  | 9.4   | 7.8   |
| Rspry1   | 9.8   | 10.7 | 10.4 | 9.5   | 9.9   | 9.4   | 9.0   | 10.5 | 11.0 | 10.1  | 11.7  | 12.0  |
| Rsrc1    | 12.2  | 10.9 | 13.6 | 12.7  | 10.5  | 12.3  | 13.1  | 13.2 | 10.1 | 10.0  | 13.3  | 13.4  |
| Rsrc2    | 20.9  | 21.7 | 32.6 | 22.0  | 20.3  | 19.5  | 27.5  | 28.7 | 21.3 | 26.9  | 30.8  | 33.6  |
| Rsu1     | 76.9  | 66.2 | 73.3 | 84.9  | 71.8  | 65.0  | 89.8  | 74.7 | 70.0 | 65.4  | 89.9  | 73.1  |
| Rtbdn    | 0.0   | 0.2  | 0.1  | 0.1   | 0.1   | 0.1   | 0.0   | 0.1  | 0.2  | 0.1   | 0.0   | 0.3   |
| Rtca     | 20.4  | 19.3 | 16.6 | 20.8  | 18.3  | 20.9  | 18.7  | 17.6 | 18.0 | 17.0  | 19.7  | 19.0  |
| Rtel1    | 2.8   | 2.8  | 3.0  | 2.2   | 3.1   | 2.0   | 3.6   | 3.1  | 3.6  | 2.3   | 2.8   | 2.3   |
| Rtf1     | 7.2   | 7.1  | 8.8  | 7.9   | 6.6   | 8.0   | 8.5   | 8.0  | 6.7  | 6.7   | 8.4   | 9.1   |
| Rtfdc1   | 36.2  | 31.9 | 28.9 | 41.4  | 31.1  | 34.3  | 28.7  | 29.2 | 26.2 | 28.8  | 28.8  | 29.5  |
| Rtkn     | 6.4   | 6.6  | 6.8  | 5.4   | 6.5   | 5.5   | 8.6   | 9.5  | 8.2  | 6.1   | 7.7   | 6.5   |
| Rtkn2    | 0.8   | 0.8  | 0.8  | 0.7   | 0.7   | 1.2   | 0.4   | 0.5  | 0.3  | 0.2   | 0.5   | 0.3   |
| Rtl1     | 0.7   | 0.6  | 0.4  | 0.4   | 0.6   | 0.6   | 0.8   | 0.7  | 0.9  | 1.0   | 1.1   | 0.7   |
| Rtn1     | 3.8   | 3.4  | 3.7  | 5.0   | 6.2   | 2.3   | 4.7   | 3.4  | 3.2  | 3.1   | 3.6   | 2.3   |
| Rtn2     | 2.9   | 4.3  | 4.6  | 1.3   | 3.8   | 2.1   | 5.1   | 5.7  | 4.7  | 6.4   | 4.9   | 4.6   |
| Rtn3     | 38.1  | 39.7 | 34.9 | 37.9  | 39.4  | 36.6  | 36.0  | 38.7 | 40.2 | 38.7  | 45.1  | 36.2  |
| Rtn4     | 101.5 | 92.0 | 68.2 | 138.6 | 116.5 | 122.5 | 75.1  | 76.2 | 80.3 | 78.8  | 84.6  | 75.1  |
| Rtn4ip1  | 2.1   | 2.9  | 2.5  | 2.6   | 2.3   | 3.1   | 2.1   | 2.3  | 2.0  | 2.3   | 2.0   | 2.1   |
| Rtn4r    | 0.9   | 0.8  | 1.1  | 1.5   | 1.4   | 1.8   | 0.8   | 1.4  | 0.9  | 0.6   | 0.6   | 0.7   |
| Rtn4r1   | 0.1   | 0.4  | 0.5  | 0.5   | 0.5   | 0.2   | 0.5   | 0.5  | 0.7  | 0.3   | 0.4   | 0.4   |

Online Table 1

|         |        |        |        |        |        |        |        |        |        |        |        |        |
|---------|--------|--------|--------|--------|--------|--------|--------|--------|--------|--------|--------|--------|
| Rtn4r12 | 0.2    | 0.3    | 0.9    | 0.2    | 0.2    | 0.1    | 0.2    | 0.7    | 0.8    | 0.7    | 0.1    | 0.6    |
| Rtp4    | 4.3    | 1.5    | 2.5    | 5.2    | 3.9    | 2.6    | 2.1    | 1.0    | 2.0    | 1.0    | 1.5    | 5.7    |
| Rttt    | 0.9    | 1.0    | 1.3    | 0.7    | 1.1    | 0.9    | 0.8    | 1.0    | 1.2    | 0.9    | 0.9    | 0.9    |
| Rufy1   | 9.3    | 7.8    | 8.9    | 8.8    | 6.9    | 8.2    | 7.1    | 8.7    | 8.1    | 7.6    | 8.9    | 10.0   |
| Rufy2   | 2.7    | 2.6    | 3.0    | 2.7    | 2.2    | 3.2    | 2.4    | 2.8    | 2.4    | 2.3    | 3.0    | 2.9    |
| Rufy3   | 2.0    | 2.4    | 2.1    | 2.2    | 2.0    | 2.0    | 1.9    | 2.2    | 1.9    | 1.8    | 1.8    | 2.3    |
| Rufy4   | 0.2    | 0.1    | 0.1    | 0.2    | 0.1    | 0.2    | 0.5    | 0.2    | 0.2    | 0.2    | 0.4    | 0.1    |
| Rundc1  | 3.0    | 3.5    | 3.4    | 3.6    | 3.3    | 3.4    | 3.3    | 3.4    | 3.1    | 3.2    | 2.9    | 3.9    |
| Rundc3a | 0.9    | 0.7    | 0.7    | 0.9    | 1.2    | 1.1    | 0.7    | 1.0    | 0.9    | 1.0    | 0.9    | 0.8    |
| Rundc3b | 0.1    | 0.0    | 0.0    | 0.1    | 0.0    | 0.0    | 0.0    | 0.0    | 0.0    | 0.0    | 0.0    | 0.0    |
| Runx1   | 2.3    | 2.8    | 4.7    | 3.2    | 5.7    | 2.1    | 6.4    | 8.8    | 6.4    | 6.8    | 6.3    | 7.0    |
| Runx1t1 | 1.9    | 2.4    | 2.8    | 1.9    | 1.5    | 2.3    | 1.9    | 2.0    | 2.1    | 1.2    | 2.0    | 2.3    |
| Runx2   | 0.7    | 1.3    | 1.4    | 1.2    | 1.5    | 1.2    | 1.7    | 1.3    | 1.3    | 1.1    | 1.0    | 1.0    |
| Runx3   | 0.0    | 0.0    | 0.0    | 0.1    | 0.2    | 0.0    | 0.0    | 0.0    | 0.0    | 0.0    | 0.0    | 0.0    |
| Rusc1   | 4.8    | 4.5    | 4.0    | 6.5    | 4.4    | 5.7    | 4.2    | 4.6    | 4.4    | 4.0    | 4.2    | 4.4    |
| Rusc2   | 13.8   | 13.0   | 9.4    | 16.2   | 12.0   | 14.9   | 13.5   | 8.0    | 11.2   | 14.3   | 13.9   | 10.3   |
| Ruvbl1  | 25.6   | 21.1   | 19.9   | 26.7   | 19.0   | 24.4   | 21.7   | 18.2   | 17.7   | 22.3   | 22.6   | 20.6   |
| Ruvbl2  | 17.0   | 16.6   | 15.5   | 17.8   | 15.3   | 17.6   | 17.7   | 13.6   | 13.7   | 15.0   | 16.6   | 14.5   |
| Rwdd1   | 57.1   | 48.1   | 47.8   | 53.0   | 42.9   | 52.0   | 50.2   | 47.7   | 43.6   | 48.2   | 60.4   | 54.6   |
| Rwdd2a  | 1.1    | 1.1    | 1.0    | 1.5    | 1.1    | 2.3    | 0.7    | 1.1    | 0.7    | 1.1    | 1.1    | 1.1    |
| Rwdd2b  | 2.0    | 1.5    | 1.8    | 1.8    | 1.8    | 1.8    | 2.7    | 2.1    | 1.9    | 2.2    | 2.5    | 2.0    |
| Rwdd3   | 1.1    | 1.5    | 1.6    | 2.1    | 1.1    | 2.4    | 1.5    | 1.5    | 1.2    | 1.3    | 1.8    | 1.6    |
| Rwdd4a  | 9.3    | 8.5    | 8.7    | 10.5   | 7.8    | 9.9    | 8.8    | 9.6    | 7.1    | 8.8    | 10.4   | 9.3    |
| Rxfp3   | 0.1    | 0.1    | 0.0    | 0.1    | 0.1    | 0.0    | 0.3    | 0.2    | 0.3    | 0.2    | 0.2    | 0.1    |
| Rxfp4   | 0.2    | 0.1    | 0.0    | 0.2    | 0.1    | 0.0    | 0.1    | 0.0    | 0.1    | 0.1    | 0.1    | 0.0    |
| Rxra    | 12.3   | 17.8   | 20.2   | 13.3   | 12.9   | 14.5   | 13.3   | 16.1   | 14.8   | 11.9   | 11.6   | 13.1   |
| Rxrb    | 6.4    | 7.1    | 6.5    | 6.7    | 6.6    | 8.2    | 6.4    | 8.0    | 8.2    | 9.0    | 6.1    | 6.9    |
| Rxrg    | 0.1    | 0.0    | 0.0    | 0.2    | 0.0    | 0.0    | 0.0    | 0.0    | 0.0    | 0.0    | 0.0    | 0.0    |
| Rybp    | 3.4    | 3.7    | 4.2    | 3.9    | 4.6    | 3.5    | 3.9    | 3.5    | 4.0    | 4.6    | 4.7    | 4.9    |
| Ryk     | 50.5   | 48.0   | 47.8   | 62.7   | 44.7   | 66.9   | 59.6   | 58.3   | 58.3   | 63.2   | 70.9   | 61.8   |
| Ryr1    | 0.0    | 0.0    | 0.0    | 0.0    | 0.0    | 0.0    | 0.0    | 0.0    | 0.0    | 0.0    | 0.0    | 0.0    |
| Ryr2    | 0.0    | 0.0    | 0.0    | 0.0    | 0.0    | 0.0    | 0.0    | 0.0    | 0.0    | 0.0    | 0.0    | 0.0    |
| Ryr3    | 0.0    | 0.0    | 0.0    | 0.0    | 0.0    | 0.0    | 0.0    | 0.0    | 0.0    | 0.0    | 0.0    | 0.0    |
| S100a1  | 22.4   | 18.3   | 22.8   | 30.0   | 24.0   | 23.2   | 26.9   | 16.1   | 15.9   | 91.6   | 61.6   | 49.2   |
| S100a10 | 350.9  | 284.7  | 213.8  | 312.9  | 298.4  | 300.2  | 366.2  | 433.6  | 350.8  | 365.6  | 467.4  | 312.7  |
| S100a11 | 261.0  | 290.8  | 305.7  | 342.4  | 291.1  | 288.5  | 426.4  | 416.7  | 292.8  | 257.8  | 341.8  | 313.1  |
| S100a13 | 69.6   | 62.4   | 53.6   | 80.7   | 67.1   | 74.1   | 73.2   | 47.9   | 59.7   | 60.8   | 60.4   | 68.6   |
| S100a14 | 0.2    | 0.3    | 0.3    | 0.1    | 0.2    | 0.0    | 0.1    | 0.0    | 0.2    | 0.4    | 0.1    | 0.1    |
| S100a16 | 56.9   | 44.7   | 38.5   | 50.8   | 42.6   | 46.6   | 55.1   | 43.1   | 46.5   | 57.2   | 51.1   | 42.4   |
| S100a3  | 2.8    | 2.1    | 1.1    | 3.2    | 1.7    | 3.0    | 1.7    | 0.3    | 0.7    | 1.9    | 1.6    | 0.7    |
| S100a4  | 3342.9 | 2308.5 | 1885.0 | 2696.6 | 2247.6 | 2563.8 | 2422.8 | 1690.1 | 1698.7 | 1774.8 | 2316.4 | 2116.9 |
| S100a5  | 0.2    | 0.0    | 0.1    | 0.2    | 0.1    | 0.1    | 0.1    | 0.0    | 0.1    | 0.3    | 0.4    | 0.0    |
| S100a6  | 2962.2 | 2032.3 | 1333.3 | 2201.0 | 1786.8 | 2529.7 | 1944.5 | 1264.9 | 1658.0 | 2826.6 | 2217.9 | 2017.0 |
| S100a7a | 3.3    | 2.8    | 2.3    | 2.1    | 1.6    | 3.3    | 0.8    | 1.0    | 1.0    | 1.8    | 0.9    | 1.0    |
| S100a8  | 2.7    | 1.8    | 1.7    | 2.0    | 1.1    | 0.5    | 0.3    | 0.0    | 0.1    | 0.9    | 0.2    | 0.5    |
| S100b   | 6.3    | 2.2    | 1.9    | 1.7    | 1.1    | 2.3    | 1.1    | 1.6    | 0.8    | 0.9    | 0.9    | 2.1    |
| S100pbp | 8.9    | 9.7    | 10.3   | 6.0    | 7.9    | 7.5    | 9.4    | 10.8   | 10.1   | 9.8    | 9.0    | 9.3    |
| S1pr1   | 1.0    | 0.3    | 0.5    | 2.5    | 4.2    | 0.1    | 0.8    | 1.0    | 0.7    | 0.7    | 0.5    | 0.8    |
| S1pr2   | 12.4   | 13.7   | 13.7   | 17.0   | 19.4   | 16.2   | 16.6   | 18.0   | 15.3   | 11.9   | 13.0   | 9.8    |
| S1pr3   | 0.2    | 0.3    | 0.5    | 0.1    | 0.8    | 0.3    | 1.2    | 1.1    | 0.6    | 4.2    | 3.6    | 2.1    |
| S1pr4   | 0.0    | 0.0    | 0.0    | 0.0    | 0.0    | 0.0    | 0.0    | 0.0    | 0.0    | 0.0    | 0.0    | 0.0    |
| S1pr5   | 0.6    | 0.6    | 0.3    | 0.2    | 0.3    | 0.1    | 0.3    | 0.6    | 0.4    | 0.5    | 0.4    | 0.4    |
| Saa3    | 3.2    | 6.0    | 10.5   | 4.7    | 37.7   | 0.6    | 8.1    | 8.9    | 8.1    | 28.2   | 3.0    | 16.3   |
| Saal1   | 1.7    | 1.8    | 1.7    | 1.8    | 1.8    | 2.1    | 1.8    | 1.6    | 1.6    | 1.5    | 1.7    | 1.7    |
| Sac3d1  | 6.7    | 5.8    | 5.1    | 6.5    | 7.7    | 6.1    | 6.3    | 5.3    | 7.7    | 8.2    | 5.7    | 5.0    |
| Sacm1l  | 26.9   | 28.0   | 26.3   | 28.0   | 27.7   | 28.5   | 26.6   | 25.1   | 30.8   | 30.0   | 34.6   | 32.8   |
| Sacs    | 1.6    | 1.3    | 0.9    | 0.8    | 1.1    | 1.2    | 1.1    | 1.1    | 1.0    | 1.0    | 1.4    | 1.0    |

Online Table 1

|         |       |      |      |       |      |      |       |      |      |       |      |       |
|---------|-------|------|------|-------|------|------|-------|------|------|-------|------|-------|
| Sae1    | 43.6  | 42.2 | 42.8 | 41.0  | 42.6 | 43.2 | 44.2  | 41.0 | 46.8 | 37.3  | 43.9 | 43.3  |
| Safb    | 9.6   | 10.8 | 13.7 | 11.1  | 11.4 | 11.3 | 14.2  | 12.7 | 10.7 | 10.5  | 12.0 | 13.2  |
| Safb2   | 5.2   | 5.8  | 7.5  | 7.6   | 6.6  | 6.2  | 8.2   | 6.6  | 5.8  | 6.6   | 6.2  | 6.7   |
| Sag     | 0.1   | 0.1  | 0.1  | 0.0   | 0.2  | 0.0  | 0.1   | 0.1  | 0.1  | 0.1   | 0.3  | 0.1   |
| Sall2   | 2.9   | 4.0  | 4.0  | 3.0   | 3.1  | 3.4  | 3.4   | 3.7  | 3.3  | 3.8   | 3.6  | 3.5   |
| Sall3   | 0.0   | 0.0  | 0.1  | 0.1   | 0.0  | 0.0  | 0.0   | 0.0  | 0.0  | 0.0   | 0.0  | 0.0   |
| Samd1   | 4.1   | 4.7  | 5.4  | 3.8   | 4.8  | 4.7  | 5.7   | 7.4  | 5.6  | 5.0   | 4.7  | 4.6   |
| Samd10  | 0.9   | 0.4  | 0.2  | 0.4   | 0.5  | 0.6  | 0.2   | 0.4  | 0.3  | 0.4   | 0.4  | 0.3   |
| Samd11  | 2.2   | 2.2  | 1.7  | 3.4   | 2.7  | 2.8  | 2.5   | 2.5  | 1.7  | 2.1   | 2.6  | 1.7   |
| Samd12  | 2.0   | 1.0  | 0.7  | 0.7   | 0.9  | 1.2  | 0.2   | 0.3  | 0.4  | 1.3   | 0.9  | 0.5   |
| Samd14  | 2.1   | 2.8  | 3.0  | 1.7   | 1.9  | 2.0  | 2.5   | 3.1  | 3.6  | 2.1   | 2.2  | 2.1   |
| Samd4   | 31.7  | 23.2 | 14.3 | 40.2  | 21.2 | 34.8 | 22.4  | 10.6 | 14.7 | 18.8  | 20.9 | 18.1  |
| Samd4b  | 4.4   | 5.0  | 3.8  | 4.5   | 4.8  | 4.6  | 6.0   | 4.7  | 4.9  | 4.9   | 4.4  | 4.1   |
| Samd5   | 1.8   | 1.8  | 2.5  | 1.3   | 3.4  | 1.5  | 3.8   | 3.5  | 3.4  | 3.5   | 3.8  | 3.2   |
| Samd8   | 7.8   | 8.1  | 7.5  | 7.5   | 7.7  | 7.4  | 7.4   | 7.2  | 7.8  | 7.6   | 8.1  | 8.6   |
| Samd9l  | 11.3  | 8.3  | 10.2 | 14.8  | 12.6 | 8.7  | 8.8   | 8.2  | 7.5  | 9.9   | 10.2 | 14.9  |
| Samhd1  | 12.5  | 13.2 | 14.1 | 12.3  | 13.1 | 7.6  | 10.1  | 11.8 | 9.4  | 8.7   | 9.7  | 8.9   |
| Samm50  | 35.8  | 29.8 | 25.3 | 32.2  | 30.8 | 35.1 | 30.9  | 28.3 | 29.7 | 31.8  | 28.6 | 30.5  |
| Samsn1  | 0.3   | 0.0  | 0.0  | 1.9   | 3.7  | 0.0  | 0.6   | 0.1  | 0.1  | 0.4   | 0.1  | 0.3   |
| Sap130  | 3.4   | 4.5  | 5.2  | 4.4   | 4.5  | 3.6  | 5.4   | 5.8  | 4.1  | 3.6   | 4.4  | 3.5   |
| Sap18   | 16.4  | 12.0 | 6.8  | 15.7  | 9.5  | 12.1 | 9.5   | 6.0  | 7.4  | 21.1  | 15.4 | 9.9   |
| Sap25   | 0.0   | 0.1  | 0.3  | 0.6   | 0.1  | 0.1  | 0.5   | 0.1  | 0.5  | 0.5   | 0.4  | 0.3   |
| Sap30   | 3.3   | 3.6  | 2.7  | 5.1   | 6.0  | 3.1  | 3.0   | 1.8  | 2.5  | 4.4   | 3.3  | 3.4   |
| Sap30bp | 14.7  | 12.5 | 14.7 | 17.9  | 12.8 | 14.8 | 16.2  | 15.1 | 11.9 | 13.4  | 15.6 | 15.6  |
| Sap30l  | 16.3  | 12.1 | 11.4 | 12.5  | 11.7 | 15.8 | 12.0  | 12.7 | 11.7 | 13.7  | 14.3 | 13.5  |
| Sapcd1  | 0.0   | 0.1  | 0.1  | 0.1   | 0.1  | 0.1  | 0.0   | 0.0  | 0.0  | 0.3   | 0.0  | 0.0   |
| Sapcd2  | 0.1   | 0.2  | 0.3  | 0.1   | 0.3  | 0.1  | 0.4   | 0.2  | 0.6  | 0.2   | 0.1  | 0.2   |
| Sar1a   | 95.6  | 82.9 | 69.8 | 94.9  | 83.2 | 81.9 | 91.3  | 84.8 | 90.8 | 85.3  | 92.0 | 91.4  |
| Sar1b   | 36.8  | 32.6 | 34.8 | 45.6  | 34.9 | 42.1 | 34.7  | 33.2 | 32.8 | 37.7  | 42.2 | 41.2  |
| Sardh   | 10.0  | 11.6 | 12.8 | 6.5   | 6.9  | 6.5  | 7.6   | 12.7 | 8.1  | 8.9   | 7.2  | 8.8   |
| Sarm1   | 0.1   | 0.2  | 0.2  | 0.2   | 0.1  | 0.1  | 0.3   | 0.2  | 0.2  | 0.1   | 0.1  | 0.1   |
| Sarnp   | 52.2  | 46.1 | 52.8 | 50.1  | 39.9 | 47.4 | 45.4  | 46.8 | 39.2 | 47.9  | 56.8 | 58.1  |
| Sars    | 61.2  | 39.1 | 35.6 | 61.7  | 39.2 | 57.1 | 41.5  | 49.1 | 40.1 | 43.5  | 49.4 | 43.5  |
| Sars2   | 2.9   | 2.8  | 2.5  | 2.4   | 2.7  | 2.2  | 3.5   | 3.5  | 3.3  | 3.4   | 2.9  | 2.6   |
| Sart1   | 11.4  | 10.4 | 10.9 | 13.1  | 10.0 | 12.5 | 12.2  | 10.5 | 9.4  | 10.1  | 11.9 | 10.8  |
| Sart3   | 5.5   | 6.1  | 6.7  | 6.6   | 6.6  | 6.8  | 7.5   | 7.3  | 7.1  | 7.6   | 7.0  | 6.5   |
| Sash1   | 22.9  | 27.6 | 28.5 | 30.2  | 28.0 | 23.0 | 24.7  | 21.9 | 23.3 | 14.7  | 17.7 | 22.8  |
| Sash3   | 0.3   | 0.0  | 0.0  | 1.8   | 2.9  | 0.0  | 0.4   | 0.1  | 0.1  | 0.2   | 0.0  | 0.2   |
| Sass6   | 0.8   | 0.9  | 1.4  | 0.6   | 1.1  | 0.6  | 1.1   | 1.0  | 1.0  | 0.8   | 1.3  | 0.9   |
| Sai1    | 108.3 | 72.2 | 58.8 | 102.2 | 98.1 | 89.0 | 101.3 | 66.3 | 97.3 | 113.3 | 99.0 | 117.3 |
| Sai2    | 4.4   | 5.3  | 7.5  | 4.7   | 3.8  | 4.8  | 4.8   | 5.1  | 5.2  | 3.8   | 3.4  | 5.4   |
| Satb1   | 0.2   | 0.2  | 0.2  | 0.3   | 0.1  | 0.4  | 0.2   | 0.2  | 0.1  | 0.3   | 0.3  | 0.2   |
| Satb2   | 0.1   | 0.1  | 0.2  | 0.2   | 0.1  | 0.1  | 0.1   | 0.1  | 0.1  | 0.1   | 0.1  | 0.1   |
| Sav1    | 28.2  | 28.7 | 31.2 | 32.1  | 29.7 | 33.1 | 32.9  | 27.2 | 29.6 | 23.3  | 31.3 | 30.9  |
| Saysd1  | 4.0   | 3.0  | 3.5  | 3.3   | 3.4  | 3.7  | 3.8   | 3.2  | 3.6  | 3.8   | 3.6  | 3.1   |
| Sbds    | 61.9  | 46.8 | 52.3 | 87.9  | 50.4 | 67.5 | 61.2  | 49.9 | 47.7 | 49.5  | 61.8 | 64.9  |
| Sbf1    | 8.9   | 11.7 | 9.4  | 9.2   | 9.8  | 9.7  | 10.7  | 10.3 | 11.5 | 9.4   | 8.8  | 7.8   |
| Sbf2    | 12.7  | 12.6 | 13.2 | 13.2  | 11.3 | 13.6 | 12.6  | 11.8 | 12.1 | 9.4   | 11.6 | 11.7  |
| Sbk1    | 1.8   | 1.8  | 1.7  | 1.3   | 1.7  | 1.3  | 1.4   | 1.5  | 1.5  | 1.7   | 1.1  | 1.3   |
| Sbk2    | 0.2   | 0.1  | 0.1  | 0.1   | 0.1  | 0.2  | 0.0   | 0.0  | 0.0  | 0.0   | 0.1  | 0.0   |
| Sbno1   | 10.1  | 10.3 | 10.0 | 10.8  | 10.9 | 10.7 | 9.8   | 9.5  | 9.8  | 10.4  | 10.7 | 10.8  |
| Sbno2   | 14.6  | 17.2 | 19.1 | 13.2  | 21.1 | 10.2 | 19.1  | 19.0 | 20.9 | 19.0  | 16.3 | 18.6  |
| Sbpl    | 0.0   | 0.1  | 0.0  | 0.0   | 0.1  | 0.0  | 0.0   | 0.0  | 0.0  | 0.0   | 0.0  | 0.1   |
| Sbsn    | 14.5  | 12.2 | 15.1 | 7.4   | 12.7 | 6.8  | 11.1  | 9.9  | 7.7  | 33.0  | 24.6 | 16.7  |
| Sbspon  | 0.0   | 0.1  | 0.0  | 0.0   | 0.0  | 0.1  | 0.0   | 0.0  | 0.0  | 0.0   | 0.0  | 0.0   |
| Sc4mol  | 51.8  | 62.4 | 52.3 | 20.0  | 35.4 | 34.9 | 87.2  | 92.7 | 82.2 | 30.0  | 90.2 | 38.4  |
| Sc5d    | 40.6  | 49.7 | 53.2 | 25.3  | 32.5 | 31.8 | 70.1  | 71.3 | 66.8 | 29.2  | 69.9 | 40.1  |

Online Table 1

|          |        |        |        |        |        |        |       |       |       |        |        |       |
|----------|--------|--------|--------|--------|--------|--------|-------|-------|-------|--------|--------|-------|
| Scaf1    | 7.4    | 8.2    | 8.2    | 7.7    | 7.7    | 7.4    | 9.5   | 7.8   | 9.0   | 7.7    | 7.7    | 7.2   |
| Scaf11   | 18.1   | 19.4   | 20.5   | 17.5   | 18.2   | 17.6   | 18.8  | 20.5  | 18.4  | 18.4   | 20.5   | 20.5  |
| Scaf4    | 2.1    | 2.4    | 2.5    | 2.4    | 2.8    | 2.0    | 3.3   | 2.0   | 2.2   | 2.1    | 2.3    | 2.0   |
| Scaf8    | 8.6    | 8.2    | 9.0    | 7.9    | 7.9    | 8.3    | 9.3   | 8.9   | 9.2   | 8.5    | 9.6    | 9.1   |
| Scai     | 1.0    | 1.2    | 1.4    | 0.9    | 0.8    | 1.1    | 0.9   | 1.3   | 1.0   | 1.2    | 1.3    | 1.3   |
| Scamp1   | 15.9   | 13.6   | 14.6   | 16.2   | 14.6   | 17.5   | 13.4  | 9.9   | 12.8  | 15.8   | 15.2   | 16.1  |
| Scamp2   | 13.1   | 11.6   | 9.0    | 16.1   | 15.6   | 16.2   | 14.0  | 12.8  | 13.0  | 14.9   | 12.6   | 11.1  |
| Scamp3   | 25.2   | 25.7   | 24.6   | 30.8   | 28.1   | 27.2   | 29.7  | 30.5  | 26.1  | 26.2   | 28.4   | 24.8  |
| Scamp4   | 15.4   | 12.9   | 11.9   | 16.2   | 15.4   | 13.9   | 17.9  | 16.3  | 15.6  | 13.9   | 14.6   | 11.2  |
| Scamp5   | 7.9    | 6.2    | 4.6    | 9.1    | 7.3    | 6.7    | 5.8   | 5.6   | 5.2   | 6.7    | 5.5    | 5.2   |
| Scand1   | 30.2   | 18.3   | 19.4   | 15.3   | 18.6   | 14.0   | 21.3  | 26.9  | 24.9  | 34.9   | 20.7   | 25.8  |
| Scap     | 15.2   | 15.5   | 15.8   | 14.1   | 15.9   | 15.5   | 16.3  | 13.6  | 13.2  | 14.5   | 11.8   | 11.6  |
| Scaper   | 5.5    | 6.3    | 7.1    | 5.5    | 4.8    | 6.5    | 5.4   | 6.0   | 5.4   | 5.3    | 6.2    | 6.1   |
| Scara3   | 6.9    | 9.7    | 13.5   | 4.9    | 6.3    | 7.3    | 8.0   | 11.1  | 8.2   | 8.9    | 8.1    | 10.1  |
| Scara5   | 0.4    | 1.5    | 3.5    | 0.2    | 0.6    | 0.7    | 0.1   | 4.7   | 0.7   | 0.5    | 0.6    | 0.6   |
| Scarb1   | 4.1    | 4.8    | 4.9    | 2.5    | 4.4    | 4.0    | 6.6   | 5.9   | 5.8   | 2.8    | 5.3    | 3.3   |
| Scarb2   | 115.3  | 90.7   | 91.1   | 100.1  | 99.0   | 93.4   | 81.2  | 77.9  | 121.3 | 128.7  | 98.4   | 155.5 |
| Scarf1   | 0.3    | 0.2    | 0.2    | 0.4    | 0.2    | 0.2    | 0.1   | 0.2   | 0.1   | 0.1    | 0.0    | 0.1   |
| Scarf2   | 10.6   | 8.3    | 6.4    | 9.6    | 7.8    | 11.2   | 10.7  | 8.1   | 9.9   | 9.8    | 7.6    | 8.0   |
| Scarna10 | 265.1  | 795.0  | 301.2  | 94.7   | 489.4  | 108.6  | 72.6  | 519.7 | 862.5 | 517.8  | 0.0    | 488.9 |
| Scarna13 | 208.1  | 189.8  | 175.4  | 109.6  | 162.1  | 143.2  | 126.8 | 197.8 | 141.7 | 188.5  | 172.3  | 130.3 |
| Scarna17 | 560.2  | 1804.2 | 0.0    | 0.0    | 0.0    | 692.8  | 0.0   | 538.7 | 0.0   | 0.0    | 738.7  | 514.1 |
| Scarna2  | 1949.5 | 0.0    | 2119.8 | 1342.7 | 2556.4 | 2011.5 | 516.7 | 0.0   | 326.0 | 1120.7 | 1733.1 | 893.0 |
| Scarna3a | 43.8   | 75.6   | 63.0   | 9.4    | 67.6   | 23.1   | 50.5  | 78.8  | 160.1 | 98.9   | 52.5   | 49.7  |
| Scarna3b | 23.0   | 7.0    | 16.8   | 0.0    | 19.6   | 0.0    | 0.0   | 26.8  | 17.7  | 9.8    | 4.6    | 0.0   |
| Scarna6  | 39.7   | 51.6   | 43.2   | 22.4   | 56.0   | 38.2   | 26.7  | 42.2  | 72.6  | 58.6   | 34.5   | 29.2  |
| Sccpdh   | 29.1   | 26.4   | 24.1   | 28.0   | 23.2   | 30.3   | 23.1  | 20.4  | 23.8  | 25.1   | 27.1   | 25.3  |
| Scd1     | 18.2   | 34.9   | 42.7   | 12.7   | 13.4   | 19.8   | 33.0  | 81.7  | 42.0  | 11.9   | 37.1   | 15.2  |
| Scd2     | 84.3   | 163.2  | 157.6  | 44.4   | 79.4   | 85.2   | 180.8 | 276.1 | 184.7 | 45.1   | 153.5  | 59.4  |
| Scd3     | 0.9    | 1.9    | 1.9    | 0.6    | 0.8    | 1.1    | 2.2   | 3.7   | 2.2   | 0.4    | 1.5    | 0.6   |
| Scd4     | 0.3    | 0.5    | 0.7    | 0.1    | 0.2    | 0.3    | 0.7   | 1.1   | 0.6   | 0.2    | 0.4    | 0.3   |
| Scel     | 90.9   | 132.8  | 166.0  | 87.8   | 87.6   | 70.9   | 133.1 | 155.6 | 117.6 | 90.8   | 136.4  | 145.0 |
| Scfd1    | 41.0   | 41.4   | 36.2   | 36.9   | 35.1   | 37.3   | 36.8  | 39.8  | 39.7  | 41.1   | 43.0   | 43.6  |
| Scfd2    | 3.9    | 3.9    | 3.7    | 3.6    | 3.6    | 3.5    | 3.3   | 2.7   | 3.3   | 3.5    | 3.6    | 3.6   |
| Scg2     | 0.7    | 1.7    | 2.7    | 1.0    | 0.8    | 1.5    | 1.3   | 5.6   | 3.9   | 0.7    | 0.8    | 2.5   |
| Scg3     | 0.1    | 0.1    | 0.0    | 0.0    | 0.0    | 0.0    | 0.1   | 0.0   | 0.1   | 0.0    | 0.1    | 0.0   |
| Scgb1a1  | 0.1    | 0.1    | 0.2    | 0.2    | 0.1    | 0.2    | 0.3   | 0.7   | 0.1   | 0.2    | 0.9    | 0.4   |
| Scgb1b30 | 0.0    | 0.0    | 0.1    | 0.0    | 0.0    | 0.1    | 0.0   | 0.0   | 0.1   | 0.1    | 0.2    | 0.0   |
| Scgb3a1  | 0.2    | 0.3    | 1.1    | 0.7    | 0.5    | 0.3    | 0.0   | 0.3   | 0.2   | 0.2    | 0.2    | 0.2   |
| Scgn     | 0.2    | 0.1    | 0.0    | 0.2    | 0.1    | 0.0    | 0.1   | 0.0   | 0.0   | 0.0    | 0.1    | 0.0   |
| Schip1   | 7.8    | 5.4    | 5.1    | 7.3    | 7.0    | 5.7    | 8.2   | 5.5   | 8.2   | 9.3    | 9.6    | 7.3   |
| Scimp    | 0.3    | 0.0    | 0.0    | 0.8    | 1.6    | 0.0    | 0.3   | 0.1   | 0.1   | 0.1    | 0.0    | 0.0   |
| Scin     | 0.7    | 0.6    | 1.4    | 0.2    | 0.8    | 0.2    | 0.7   | 1.1   | 0.4   | 1.0    | 1.4    | 1.6   |
| Sclt1    | 3.2    | 3.2    | 3.1    | 3.2    | 2.7    | 3.0    | 2.6   | 3.1   | 2.8   | 4.0    | 4.0    | 3.9   |
| Scly     | 8.1    | 7.8    | 6.6    | 10.9   | 9.4    | 11.3   | 7.5   | 5.7   | 6.5   | 5.5    | 6.7    | 6.3   |
| Scmh1    | 8.9    | 6.7    | 6.1    | 8.2    | 6.0    | 8.9    | 6.2   | 4.8   | 4.8   | 6.8    | 6.7    | 5.4   |
| Scml2    | 0.3    | 0.7    | 0.9    | 0.1    | 0.8    | 0.3    | 0.7   | 0.4   | 0.5   | 0.3    | 0.5    | 0.3   |
| Scml4    | 0.6    | 0.6    | 0.4    | 1.4    | 0.8    | 0.9    | 0.7   | 0.4   | 0.4   | 0.3    | 0.3    | 0.2   |
| Scn11a   | 0.0    | 0.0    | 0.0    | 0.0    | 0.0    | 0.0    | 0.0   | 0.0   | 0.0   | 0.0    | 0.0    | 0.0   |
| Scn1a    | 0.0    | 0.0    | 0.0    | 0.0    | 0.0    | 0.0    | 0.0   | 0.0   | 0.0   | 0.0    | 0.0    | 0.0   |
| Scn1b    | 31.0   | 30.8   | 29.9   | 30.3   | 29.5   | 31.9   | 24.9  | 21.2  | 23.6  | 23.8   | 20.7   | 25.6  |
| Scn2a1   | 0.8    | 0.9    | 1.3    | 0.8    | 0.7    | 1.2    | 0.9   | 1.0   | 0.9   | 0.9    | 1.2    | 0.9   |
| Scn2b    | 0.1    | 0.1    | 0.2    | 0.0    | 0.0    | 0.0    | 0.0   | 0.1   | 0.0   | 0.0    | 0.0    | 0.1   |
| Scn3a    | 0.0    | 0.0    | 0.0    | 0.0    | 0.0    | 0.0    | 0.0   | 0.0   | 0.0   | 0.0    | 0.0    | 0.0   |
| Scn3b    | 1.3    | 0.7    | 0.7    | 0.7    | 1.6    | 0.4    | 0.9   | 0.5   | 0.4   | 1.5    | 0.8    | 0.6   |
| Scn4a    | 0.0    | 0.0    | 0.0    | 0.0    | 0.0    | 0.0    | 0.0   | 0.0   | 0.0   | 0.0    | 0.0    | 0.0   |
| Scn4b    | 0.1    | 0.2    | 0.1    | 0.1    | 0.3    | 0.1    | 0.1   | 0.0   | 0.1   | 0.0    | 0.1    | 0.1   |

Online Table 1



|         |       |       |       |       |       |       |       |       |       |       |       |       |
|---------|-------|-------|-------|-------|-------|-------|-------|-------|-------|-------|-------|-------|
| Scn5a   | 0.0   | 0.0   | 0.0   | 0.0   | 0.0   | 0.0   | 0.0   | 0.0   | 0.0   | 0.0   | 0.0   | 0.0   |
| Scn7a   | 4.8   | 10.4  | 22.9  | 3.0   | 8.4   | 1.8   | 7.3   | 14.0  | 13.3  | 4.2   | 5.1   | 10.8  |
| Scn8a   | 0.0   | 0.0   | 0.0   | 0.0   | 0.0   | 0.0   | 0.0   | 0.0   | 0.0   | 0.0   | 0.0   | 0.0   |
| Scn9a   | 0.0   | 0.0   | 0.0   | 0.0   | 0.0   | 0.0   | 0.0   | 0.0   | 0.0   | 0.0   | 0.0   | 0.0   |
| Scnm1   | 15.2  | 15.4  | 15.7  | 23.2  | 13.5  | 17.0  | 16.2  | 17.4  | 14.0  | 15.5  | 19.4  | 17.3  |
| Scnn1a  | 0.3   | 0.2   | 0.2   | 0.3   | 0.3   | 0.2   | 0.1   | 0.2   | 0.2   | 0.2   | 0.3   | 0.2   |
| Sco1    | 3.5   | 2.8   | 3.0   | 3.8   | 3.3   | 3.0   | 3.2   | 2.8   | 3.0   | 3.5   | 3.6   | 3.3   |
| Sco2    | 10.4  | 7.9   | 6.6   | 12.7  | 9.9   | 10.0  | 11.7  | 11.8  | 10.0  | 10.4  | 10.1  | 8.6   |
| Scoc    | 40.2  | 39.0  | 39.9  | 49.2  | 40.8  | 50.2  | 34.6  | 29.8  | 35.9  | 47.4  | 50.8  | 44.7  |
| Scp2    | 49.8  | 59.0  | 71.9  | 44.8  | 44.7  | 42.2  | 37.1  | 64.9  | 48.2  | 53.2  | 49.1  | 54.1  |
| Scpep1  | 80.8  | 72.3  | 69.4  | 94.7  | 67.4  | 119.1 | 53.6  | 79.8  | 61.1  | 64.6  | 82.8  | 65.6  |
| Scrib   | 4.5   | 4.9   | 4.7   | 3.8   | 4.4   | 4.6   | 4.6   | 4.2   | 5.0   | 4.5   | 4.3   | 3.9   |
| Scrn1   | 35.5  | 25.2  | 22.5  | 37.4  | 18.9  | 36.6  | 27.7  | 31.4  | 23.6  | 26.5  | 33.0  | 32.4  |
| Scrn2   | 2.8   | 3.4   | 2.5   | 1.9   | 2.0   | 3.2   | 2.1   | 3.3   | 2.6   | 2.9   | 2.6   | 2.9   |
| Scrn3   | 4.2   | 5.1   | 5.1   | 4.2   | 3.3   | 5.3   | 3.8   | 4.5   | 4.2   | 6.0   | 5.7   | 5.3   |
| Sct     | 0.1   | 0.2   | 0.5   | 0.0   | 0.1   | 0.0   | 0.4   | 0.0   | 0.0   | 0.1   | 0.0   | 0.2   |
| Sctr    | 0.1   | 0.1   | 0.0   | 0.1   | 0.0   | 0.2   | 0.0   | 0.0   | 0.0   | 0.0   | 0.0   | 0.0   |
| Scube1  | 0.0   | 0.1   | 0.0   | 0.0   | 0.0   | 0.1   | 0.1   | 0.0   | 0.0   | 0.1   | 0.0   | 0.0   |
| Scube2  | 0.1   | 0.1   | 0.3   | 0.2   | 0.2   | 0.2   | 0.2   | 0.3   | 0.2   | 0.1   | 0.0   | 0.2   |
| Scube3  | 0.1   | 0.1   | 0.2   | 0.2   | 0.2   | 0.1   | 0.1   | 0.2   | 0.2   | 0.7   | 0.1   | 0.2   |
| Scx     | 15.0  | 4.2   | 2.6   | 2.9   | 2.3   | 3.5   | 1.8   | 2.1   | 1.2   | 3.5   | 2.8   | 4.1   |
| Scyl1   | 35.2  | 33.4  | 33.3  | 40.6  | 36.5  | 35.4  | 41.2  | 38.6  | 37.8  | 37.0  | 39.4  | 38.4  |
| Scyl2   | 13.1  | 12.8  | 12.4  | 13.2  | 12.5  | 13.1  | 11.5  | 11.5  | 11.5  | 11.7  | 11.9  | 12.5  |
| Scyl3   | 3.6   | 4.1   | 3.9   | 3.3   | 4.2   | 3.4   | 3.2   | 3.8   | 4.3   | 3.9   | 3.2   | 3.8   |
| Sdad1   | 4.1   | 3.5   | 3.1   | 4.3   | 3.6   | 4.1   | 4.1   | 3.7   | 3.1   | 3.6   | 4.3   | 3.6   |
| Sdc1    | 35.0  | 32.0  | 30.9  | 21.0  | 30.1  | 28.0  | 35.9  | 32.4  | 35.8  | 35.9  | 33.6  | 42.4  |
| Sdc2    | 73.2  | 63.6  | 67.0  | 87.3  | 55.0  | 83.1  | 67.3  | 58.8  | 78.6  | 71.2  | 85.5  | 89.2  |
| Sdc3    | 30.8  | 29.3  | 26.8  | 48.5  | 49.1  | 40.0  | 38.1  | 26.6  | 30.1  | 20.0  | 22.9  | 24.5  |
| Sdc4    | 67.4  | 64.8  | 69.6  | 47.1  | 70.2  | 36.5  | 57.9  | 51.6  | 56.2  | 187.9 | 85.4  | 99.7  |
| Sdcbp   | 82.0  | 69.2  | 57.2  | 96.0  | 102.3 | 81.6  | 65.5  | 59.7  | 63.7  | 73.7  | 80.5  | 69.4  |
| Sdcbp2  | 0.5   | 0.2   | 0.6   | 0.2   | 0.3   | 0.4   | 0.1   | 0.3   | 0.2   | 0.2   | 0.0   | 0.3   |
| Sdccag3 | 31.6  | 27.4  | 24.8  | 32.9  | 28.5  | 29.3  | 30.1  | 26.5  | 27.7  | 26.0  | 29.9  | 27.2  |
| Sdccag8 | 11.4  | 11.3  | 10.8  | 11.9  | 9.6   | 11.6  | 9.1   | 10.8  | 8.3   | 8.9   | 10.7  | 10.5  |
| Sde2    | 8.6   | 9.5   | 8.7   | 8.3   | 8.1   | 7.8   | 8.6   | 8.5   | 7.7   | 8.2   | 8.9   | 8.4   |
| Sdf2    | 50.6  | 46.1  | 41.3  | 45.9  | 46.9  | 42.4  | 47.7  | 44.1  | 50.4  | 56.3  | 50.7  | 52.6  |
| Sdf2l1  | 41.6  | 33.8  | 29.8  | 47.6  | 37.8  | 39.9  | 34.8  | 30.9  | 34.7  | 36.4  | 34.8  | 34.0  |
| Sdf4    | 39.3  | 32.2  | 38.6  | 42.3  | 34.1  | 37.5  | 39.6  | 38.9  | 33.7  | 35.7  | 36.3  | 43.2  |
| Sdha    | 63.3  | 59.6  | 55.5  | 62.7  | 61.1  | 64.0  | 58.6  | 60.5  | 55.8  | 59.7  | 60.8  | 63.1  |
| Sdhaf1  | 7.6   | 6.8   | 6.5   | 8.1   | 6.5   | 8.5   | 9.2   | 8.0   | 6.3   | 8.6   | 10.6  | 8.3   |
| Sdhaf2  | 14.9  | 13.5  | 12.0  | 16.7  | 12.5  | 15.8  | 12.5  | 11.3  | 11.4  | 14.8  | 16.1  | 14.5  |
| Sdhab   | 67.8  | 57.8  | 51.2  | 65.6  | 60.4  | 62.1  | 52.3  | 55.6  | 48.6  | 54.4  | 58.9  | 56.4  |
| Sdhc    | 65.8  | 61.1  | 50.7  | 64.4  | 57.5  | 62.3  | 50.1  | 51.7  | 57.7  | 62.5  | 55.8  | 50.4  |
| Sdhhd   | 51.4  | 44.6  | 41.0  | 42.3  | 50.3  | 44.8  | 44.3  | 41.8  | 49.6  | 50.3  | 45.1  | 45.8  |
| Sdk1    | 1.4   | 1.4   | 1.7   | 1.1   | 1.6   | 1.0   | 1.3   | 0.8   | 1.1   | 2.1   | 1.0   | 1.3   |
| Sdk2    | 0.0   | 0.0   | 0.0   | 0.0   | 0.0   | 0.0   | 0.0   | 0.0   | 0.0   | 0.0   | 0.0   | 0.0   |
| Sdpr    | 101.4 | 58.4  | 46.2  | 75.5  | 42.8  | 55.2  | 78.5  | 52.2  | 64.5  | 87.2  | 99.6  | 79.5  |
| Sdr39u1 | 4.7   | 5.4   | 6.0   | 5.0   | 4.0   | 4.8   | 3.6   | 4.4   | 4.4   | 4.4   | 4.4   | 6.0   |
| Sdr42e1 | 2.3   | 2.4   | 2.2   | 2.2   | 2.0   | 2.4   | 2.0   | 1.6   | 1.7   | 1.9   | 1.6   | 2.4   |
| Sds     | 0.1   | 0.0   | 0.0   | 0.0   | 0.0   | 0.1   | 0.1   | 0.1   | 0.2   | 0.1   | 0.1   | 0.0   |
| Sdsl    | 10.9  | 10.0  | 5.7   | 9.0   | 7.1   | 6.7   | 4.8   | 3.5   | 4.9   | 7.0   | 4.6   | 4.8   |
| Sebox   | 0.1   | 0.0   | 0.0   | 0.0   | 0.1   | 0.1   | 0.0   | 0.0   | 0.0   | 0.1   | 0.0   | 0.0   |
| Sec1    | 0.0   | 0.0   | 0.1   | 0.0   | 0.0   | 0.1   | 0.0   | 0.0   | 0.0   | 0.1   | 0.0   | 0.1   |
| Sec11a  | 45.1  | 43.4  | 42.7  | 50.3  | 43.2  | 45.5  | 45.7  | 52.0  | 49.9  | 54.0  | 50.7  | 54.1  |
| Sec11c  | 78.4  | 53.2  | 45.7  | 85.3  | 62.3  | 67.3  | 56.4  | 37.4  | 41.6  | 59.6  | 57.9  | 63.0  |
| Sec13   | 132.7 | 117.3 | 105.0 | 130.0 | 111.1 | 113.5 | 122.9 | 123.5 | 111.7 | 118.5 | 130.5 | 124.5 |
| Sec14l1 | 18.7  | 16.3  | 15.0  | 17.9  | 16.9  | 19.0  | 17.3  | 17.5  | 15.7  | 14.4  | 15.9  | 12.8  |
| Sec14l2 | 0.7   | 0.3   | 0.3   | 0.6   | 0.5   | 0.7   | 0.8   | 0.8   | 0.6   | 0.2   | 0.6   | 0.5   |

Online Table 1

|           |       |       |       |       |       |       |       |       |       |       |       |       |
|-----------|-------|-------|-------|-------|-------|-------|-------|-------|-------|-------|-------|-------|
| Sec14I5   | 0.1   | 0.2   | 0.1   | 0.0   | 0.3   | 0.1   | 0.1   | 0.0   | 0.0   | 0.2   | 0.0   | 0.1   |
| Sec16a    | 18.3  | 20.4  | 18.9  | 17.8  | 19.4  | 17.8  | 19.5  | 19.3  | 18.0  | 16.4  | 19.0  | 17.1  |
| Sec16b    | 1.9   | 1.2   | 1.8   | 1.6   | 1.3   | 1.2   | 1.8   | 2.1   | 1.8   | 1.8   | 1.8   | 1.6   |
| Sec22a    | 5.9   | 5.1   | 5.0   | 5.6   | 5.3   | 5.7   | 4.6   | 4.8   | 5.3   | 5.3   | 7.1   | 5.4   |
| Sec22b    | 58.4  | 55.8  | 54.1  | 60.9  | 52.0  | 58.4  | 51.9  | 55.7  | 49.9  | 48.9  | 52.3  | 52.2  |
| Sec22c    | 1.1   | 0.9   | 0.8   | 1.0   | 0.9   | 1.0   | 0.9   | 0.8   | 0.9   | 0.8   | 1.0   | 0.8   |
| Sec23a    | 61.7  | 53.4  | 47.6  | 69.3  | 52.5  | 65.8  | 57.9  | 52.0  | 53.3  | 51.8  | 68.2  | 60.6  |
| Sec23b    | 24.8  | 23.4  | 21.9  | 26.4  | 24.1  | 21.4  | 24.5  | 23.9  | 24.0  | 23.9  | 25.2  | 23.7  |
| Sec23ip   | 22.2  | 21.0  | 22.4  | 18.6  | 20.3  | 18.6  | 21.9  | 23.1  | 20.1  | 20.3  | 24.4  | 23.2  |
| Sec24a    | 2.3   | 2.8   | 2.5   | 2.4   | 2.8   | 2.6   | 2.8   | 2.7   | 2.4   | 2.6   | 3.0   | 2.3   |
| Sec24b    | 4.1   | 5.1   | 4.7   | 4.3   | 4.4   | 4.5   | 5.3   | 5.1   | 4.9   | 4.0   | 5.2   | 3.6   |
| Sec24c    | 23.3  | 24.8  | 20.0  | 21.8  | 23.0  | 23.1  | 22.7  | 21.6  | 22.6  | 21.3  | 24.0  | 19.3  |
| Sec24d    | 38.6  | 36.6  | 37.7  | 38.3  | 37.7  | 37.5  | 40.3  | 45.7  | 42.5  | 36.4  | 42.1  | 38.8  |
| Sec31a    | 74.7  | 74.0  | 71.8  | 78.9  | 70.2  | 74.0  | 81.1  | 87.8  | 75.4  | 72.8  | 82.4  | 78.6  |
| Sec31b    | 0.2   | 0.4   | 0.3   | 0.3   | 0.2   | 0.4   | 0.2   | 0.3   | 0.2   | 0.2   | 0.1   | 0.2   |
| Sec61a1   | 63.8  | 57.9  | 54.1  | 64.7  | 64.4  | 57.4  | 66.8  | 76.1  | 69.1  | 69.9  | 66.8  | 66.2  |
| Sec61a2   | 8.9   | 10.0  | 8.6   | 9.8   | 8.3   | 10.2  | 7.6   | 8.3   | 8.0   | 8.4   | 8.3   | 7.4   |
| Sec61b    | 121.8 | 98.8  | 90.4  | 109.6 | 104.7 | 108.2 | 95.2  | 109.2 | 112.0 | 121.7 | 111.8 | 101.8 |
| Sec61g    | 139.9 | 108.8 | 115.4 | 138.6 | 104.4 | 116.5 | 108.1 | 110.1 | 101.6 | 118.6 | 134.0 | 148.6 |
| Sec62     | 64.8  | 57.6  | 70.7  | 90.1  | 54.7  | 73.0  | 68.8  | 59.4  | 52.4  | 60.1  | 75.9  | 85.5  |
| Sec63     | 14.6  | 13.2  | 13.6  | 15.7  | 14.3  | 12.4  | 16.5  | 13.6  | 13.7  | 15.6  | 17.3  | 17.2  |
| Secisbp2  | 4.9   | 4.8   | 3.4   | 5.4   | 4.6   | 4.5   | 4.3   | 5.2   | 4.9   | 4.5   | 4.8   | 4.6   |
| Secisbp2l | 20.9  | 21.2  | 19.7  | 24.2  | 20.9  | 20.3  | 21.9  | 19.0  | 20.9  | 18.0  | 22.8  | 21.7  |
| Sectm1a   | 0.0   | 0.0   | 0.0   | 0.0   | 0.0   | 0.0   | 0.0   | 0.0   | 0.0   | 0.0   | 0.0   | 0.0   |
| Seh1l     | 11.6  | 10.9  | 10.7  | 11.8  | 11.5  | 11.9  | 11.6  | 11.2  | 11.0  | 12.9  | 12.5  | 11.4  |
| Sel1l     | 43.3  | 43.3  | 43.5  | 45.5  | 41.8  | 42.6  | 44.1  | 46.1  | 45.7  | 37.0  | 43.3  | 40.4  |
| Sel1l3    | 0.0   | 0.0   | 0.0   | 0.0   | 0.1   | 0.0   | 0.0   | 0.0   | 0.0   | 0.0   | 0.0   | 0.0   |
| Sele      | 0.2   | 0.2   | 0.1   | 0.4   | 0.4   | 0.1   | 0.3   | 0.1   | 0.1   | 0.2   | 0.2   | 0.2   |
| Selenbp1  | 5.1   | 6.7   | 9.3   | 2.1   | 2.1   | 4.6   | 2.4   | 7.4   | 3.4   | 2.4   | 2.2   | 3.2   |
| Selenbp2  | 1.8   | 2.3   | 3.2   | 0.5   | 0.7   | 1.5   | 0.7   | 2.6   | 1.2   | 0.9   | 0.6   | 0.9   |
| Selk      | 82.0  | 57.2  | 51.8  | 93.8  | 63.8  | 83.4  | 55.3  | 49.7  | 50.5  | 67.7  | 70.4  | 75.5  |
| Selm      | 94.7  | 59.8  | 50.5  | 91.3  | 57.8  | 88.4  | 82.6  | 74.8  | 68.7  | 77.0  | 77.5  | 75.9  |
| Selp      | 0.8   | 0.2   | 0.8   | 0.2   | 0.5   | 0.2   | 0.3   | 0.2   | 0.2   | 0.5   | 0.1   | 0.7   |
| Selplg    | 0.6   | 0.0   | 0.0   | 5.2   | 8.9   | 0.0   | 1.6   | 0.1   | 0.2   | 0.5   | 0.2   | 0.4   |
| Selrc1    | 1.3   | 1.0   | 1.0   | 1.4   | 1.2   | 1.0   | 0.9   | 1.5   | 1.1   | 1.3   | 0.8   | 1.1   |
| Sema3a    | 0.7   | 0.2   | 0.0   | 0.6   | 0.2   | 0.5   | 0.3   | 0.2   | 0.4   | 2.8   | 2.1   | 0.7   |
| Sema3b    | 4.7   | 2.6   | 2.1   | 6.0   | 1.9   | 5.0   | 1.3   | 2.0   | 1.9   | 2.8   | 3.0   | 2.6   |
| Sema3c    | 8.0   | 4.6   | 4.2   | 10.9  | 6.1   | 6.8   | 3.5   | 5.4   | 2.4   | 5.9   | 5.3   | 3.2   |
| Sema3d    | 25.6  | 16.7  | 21.0  | 20.6  | 16.3  | 12.9  | 19.0  | 26.2  | 19.1  | 16.5  | 25.0  | 23.8  |
| Sema3e    | 4.2   | 1.5   | 0.4   | 1.6   | 0.6   | 2.4   | 0.6   | 0.3   | 0.7   | 3.0   | 2.8   | 1.7   |
| Sema3f    | 4.2   | 2.4   | 2.5   | 1.0   | 0.4   | 0.7   | 0.9   | 2.8   | 2.2   | 12.2  | 5.6   | 4.1   |
| Sema3g    | 0.1   | 0.1   | 0.2   | 0.1   | 0.2   | 0.0   | 0.1   | 0.1   | 0.1   | 0.0   | 0.1   | 0.1   |
| Sema4a    | 0.2   | 0.2   | 0.3   | 0.4   | 0.7   | 0.1   | 0.1   | 0.1   | 0.2   | 0.6   | 0.3   | 0.1   |
| Sema4b    | 0.9   | 0.9   | 1.0   | 1.1   | 2.5   | 0.6   | 1.3   | 1.1   | 1.3   | 1.8   | 1.0   | 1.2   |
| Sema4c    | 3.8   | 4.4   | 4.3   | 3.3   | 4.6   | 3.5   | 4.3   | 4.5   | 4.9   | 4.4   | 3.6   | 3.8   |
| Sema4d    | 0.6   | 0.0   | 0.1   | 5.2   | 10.0  | 0.1   | 1.0   | 0.2   | 0.2   | 0.5   | 0.2   | 0.3   |
| Sema4f    | 0.2   | 0.1   | 0.0   | 0.1   | 0.0   | 0.1   | 0.0   | 0.1   | 0.0   | 0.0   | 0.2   | 0.1   |
| Sema4g    | 0.3   | 0.6   | 0.5   | 0.2   | 0.3   | 0.3   | 0.2   | 0.3   | 0.2   | 0.4   | 0.3   | 0.2   |
| Sema5a    | 0.3   | 0.4   | 0.4   | 0.2   | 0.2   | 0.3   | 0.4   | 0.6   | 0.3   | 0.6   | 0.5   | 0.5   |
| Sema5b    | 0.0   | 0.0   | 0.0   | 0.0   | 0.0   | 0.0   | 0.0   | 0.0   | 0.0   | 0.0   | 0.0   | 0.0   |
| Sema6a    | 0.1   | 0.5   | 0.8   | 0.1   | 0.5   | 0.2   | 0.6   | 0.5   | 0.5   | 0.3   | 0.2   | 0.2   |
| Sema6b    | 0.1   | 0.2   | 0.2   | 0.4   | 0.5   | 0.1   | 0.3   | 0.1   | 0.1   | 0.0   | 0.1   | 0.1   |
| Sema6c    | 0.5   | 0.6   | 0.5   | 0.2   | 0.3   | 0.4   | 0.5   | 0.5   | 0.6   | 0.5   | 0.5   | 0.5   |
| Sema6d    | 4.6   | 9.9   | 12.3  | 3.5   | 5.9   | 3.0   | 5.8   | 7.6   | 7.0   | 3.8   | 4.2   | 5.0   |
| Sema7a    | 0.5   | 0.1   | 0.1   | 0.3   | 0.6   | 0.2   | 1.7   | 0.5   | 1.0   | 1.7   | 1.3   | 1.1   |
| Senp1     | 3.2   | 3.2   | 3.1   | 3.4   | 3.0   | 3.1   | 3.6   | 3.3   | 3.2   | 2.3   | 3.0   | 2.9   |
| Senp2     | 10.2  | 10.7  | 10.4  | 11.4  | 9.9   | 12.0  | 9.2   | 8.5   | 9.6   | 8.7   | 9.8   | 9.2   |

Online Table 1

|              |        |        |       |        |        |        |        |       |       |       |       |       |
|--------------|--------|--------|-------|--------|--------|--------|--------|-------|-------|-------|-------|-------|
| Senp3        | 28.1   | 27.1   | 25.2  | 25.7   | 25.6   | 27.6   | 25.5   | 24.7  | 24.1  | 26.9  | 25.0  | 23.3  |
| Senp5        | 10.2   | 10.3   | 8.9   | 9.9    | 10.3   | 10.6   | 9.0    | 8.4   | 9.1   | 10.3  | 11.0  | 9.2   |
| Senp6        | 19.7   | 21.4   | 20.3  | 21.8   | 19.2   | 22.0   | 20.1   | 19.4  | 20.4  | 19.8  | 23.9  | 21.9  |
| Senp7        | 2.7    | 2.8    | 3.3   | 2.4    | 2.1    | 2.3    | 2.3    | 3.1   | 2.7   | 3.5   | 3.3   | 3.5   |
| Senp8        | 2.1    | 2.5    | 2.7   | 2.7    | 2.1    | 2.6    | 1.7    | 2.6   | 2.4   | 2.5   | 2.8   | 2.3   |
| Sephs1       | 5.5    | 5.9    | 6.2   | 5.3    | 5.7    | 4.6    | 6.9    | 6.6   | 6.5   | 5.6   | 6.5   | 6.4   |
| Sephs2       | 20.0   | 17.4   | 15.7  | 19.3   | 23.4   | 17.4   | 19.0   | 15.3  | 14.5  | 17.9  | 17.6  | 15.5  |
| Sepn1        | 17.1   | 17.3   | 16.6  | 13.6   | 16.7   | 17.6   | 18.6   | 18.0  | 19.9  | 16.7  | 15.7  | 14.6  |
| Sepp1        | 36.3   | 32.9   | 53.2  | 53.3   | 45.0   | 33.2   | 37.9   | 48.0  | 40.9  | 77.0  | 59.9  | 80.6  |
| Sepsecs      | 4.8    | 4.7    | 4.4   | 4.8    | 4.1    | 4.5    | 4.7    | 4.1   | 4.7   | 4.4   | 4.2   | 4.8   |
| Sepw1        | 75.6   | 49.1   | 48.7  | 89.0   | 48.5   | 90.8   | 53.7   | 53.6  | 46.4  | 60.2  | 57.7  | 59.2  |
| Serac1       | 0.9    | 1.0    | 1.1   | 0.8    | 1.1    | 1.2    | 0.9    | 1.0   | 0.8   | 0.9   | 0.8   | 0.8   |
| Serbp1       | 33.6   | 29.1   | 37.3  | 39.5   | 29.1   | 30.7   | 37.2   | 36.2  | 28.2  | 34.2  | 42.5  | 43.1  |
| Serf1        | 40.5   | 34.8   | 41.5  | 51.0   | 32.8   | 46.5   | 35.4   | 38.3  | 30.7  | 37.4  | 45.9  | 46.5  |
| Serf2        | 154.0  | 126.6  | 112.9 | 192.2  | 136.0  | 180.2  | 143.0  | 127.0 | 124.0 | 131.9 | 139.2 | 148.9 |
| Sergef       | 3.9    | 3.4    | 3.3   | 3.0    | 3.2    | 3.5    | 3.1    | 3.4   | 2.7   | 3.0   | 3.0   | 2.8   |
| Serhl        | 10.8   | 9.1    | 9.2   | 9.7    | 6.9    | 9.4    | 9.3    | 10.5  | 9.0   | 8.8   | 8.8   | 9.4   |
| Serinc1      | 129.3  | 112.4  | 111.2 | 158.6  | 111.9  | 145.1  | 115.1  | 107.1 | 104.9 | 123.0 | 143.9 | 144.3 |
| Serinc2      | 0.5    | 0.4    | 0.2   | 1.2    | 0.4    | 1.8    | 0.2    | 0.2   | 0.1   | 0.2   | 0.3   | 0.1   |
| Serinc3      | 129.7  | 115.5  | 114.5 | 152.2  | 136.0  | 143.1  | 120.5  | 126.3 | 123.0 | 128.8 | 123.8 | 139.0 |
| Serinc4      | 22.0   | 15.7   | 13.0  | 24.5   | 19.3   | 24.4   | 15.0   | 13.5  | 16.2  | 19.1  | 18.4  | 18.8  |
| Serinc5      | 3.1    | 4.1    | 4.6   | 2.4    | 3.8    | 2.7    | 4.0    | 5.7   | 5.5   | 5.4   | 5.1   | 5.2   |
| Serp1        | 103.3  | 92.8   | 92.4  | 112.3  | 109.9  | 101.2  | 93.9   | 99.2  | 108.2 | 124.6 | 131.9 | 125.4 |
| Serp2        | 0.8    | 0.1    | 0.1   | 0.4    | 0.2    | 0.4    | 0.3    | 0.2   | 0.0   | 0.6   | 0.4   | 0.3   |
| Serpina11    | 0.0    | 0.0    | 0.0   | 0.0    | 0.1    | 0.2    | 0.0    | 0.0   | 0.0   | 0.0   | 0.0   | 0.1   |
| Serpina12    | 0.3    | 0.4    | 0.3   | 0.3    | 0.3    | 0.4    | 0.3    | 0.3   | 0.3   | 0.2   | 0.2   | 0.3   |
| Serpina3a    | 0.0    | 0.1    | 0.0   | 0.0    | 0.0    | 0.0    | 0.0    | 0.0   | 0.0   | 0.0   | 0.0   | 0.0   |
| Serpina3b    | 0.1    | 0.1    | 0.0   | 0.0    | 0.0    | 0.0    | 0.0    | 0.0   | 0.0   | 0.0   | 0.0   | 0.0   |
| Serpina3c    | 2.3    | 2.2    | 2.9   | 1.3    | 2.5    | 1.1    | 1.3    | 2.2   | 1.2   | 0.7   | 1.0   | 1.6   |
| Serpina3f    | 0.2    | 0.4    | 1.1   | 0.2    | 0.8    | 0.1    | 0.3    | 1.0   | 0.3   | 0.2   | 0.1   | 0.4   |
| Serpina3g    | 5.0    | 5.6    | 14.5  | 1.4    | 13.7   | 0.6    | 7.2    | 11.0  | 5.2   | 4.2   | 2.6   | 5.8   |
| Serpina3h    | 3.7    | 4.5    | 10.2  | 1.4    | 5.3    | 0.6    | 2.8    | 10.7  | 3.2   | 0.7   | 0.8   | 2.1   |
| Serpina3i    | 2.2    | 2.2    | 5.9   | 1.1    | 4.9    | 0.3    | 2.5    | 4.1   | 1.8   | 1.2   | 0.7   | 2.0   |
| Serpina3j    | 0.0    | 0.0    | 0.0   | 0.0    | 0.0    | 0.0    | 0.0    | 0.0   | 0.0   | 0.0   | 0.0   | 0.0   |
| Serpina3k    | 0.0    | 0.0    | 0.1   | 0.0    | 0.0    | 0.0    | 0.0    | 0.1   | 0.0   | 0.0   | 0.0   | 0.0   |
| Serpina3m    | 0.2    | 0.9    | 2.7   | 0.0    | 0.6    | 0.0    | 0.4    | 0.7   | 0.2   | 0.5   | 0.3   | 0.5   |
| Serpina3n    | 69.9   | 163.6  | 547.7 | 23.7   | 163.4  | 18.6   | 89.9   | 302.8 | 79.3  | 66.6  | 57.7  | 140.7 |
| Serpina4-ps1 | 0.0    | 0.1    | 0.2   | 0.0    | 0.0    | 0.1    | 0.0    | 0.0   | 0.0   | 0.0   | 0.0   | 0.1   |
| Serpina5     | 0.1    | 0.1    | 0.1   | 0.0    | 0.1    | 0.0    | 0.0    | 0.1   | 0.0   | 0.0   | 0.1   | 0.0   |
| Serpina9     | 2.5    | 2.1    | 1.3   | 0.9    | 1.1    | 1.3    | 1.0    | 2.2   | 1.3   | 1.2   | 1.8   | 0.9   |
| Serpina12    | 0.1    | 0.0    | 0.0   | 0.2    | 0.2    | 0.0    | 0.0    | 0.0   | 0.0   | 0.0   | 0.0   | 0.0   |
| Serpina1a    | 32.5   | 16.0   | 13.7  | 16.0   | 17.9   | 15.8   | 17.7   | 24.5  | 27.3  | 22.3  | 26.8  | 34.3  |
| Serpina1b    | 1.5    | 1.5    | 1.1   | 1.7    | 1.4    | 1.9    | 0.2    | 0.7   | 0.7   | 0.9   | 0.6   | 0.8   |
| Serpina1c    | 0.9    | 0.4    | 0.1   | 1.5    | 0.2    | 1.1    | 0.0    | 0.1   | 0.0   | 0.2   | 0.2   | 0.1   |
| Serpina2     | 0.0    | 0.0    | 0.1   | 0.2    | 0.1    | 0.0    | 0.4    | 0.0   | 0.2   | 0.3   | 0.2   | 0.2   |
| Serpina6a    | 387.2  | 283.0  | 230.1 | 356.8  | 277.1  | 365.5  | 270.6  | 245.9 | 274.5 | 243.2 | 304.8 | 326.1 |
| Serpina6b    | 87.8   | 33.5   | 27.1  | 42.3   | 24.1   | 45.0   | 19.2   | 16.0  | 27.0  | 76.4  | 66.5  | 56.3  |
| Serpina6c    | 8.9    | 3.8    | 1.4   | 7.1    | 2.5    | 4.8    | 1.1    | 0.8   | 0.8   | 1.4   | 2.9   | 1.2   |
| Serpina8     | 4.2    | 3.5    | 4.7   | 1.4    | 3.0    | 1.6    | 3.3    | 3.2   | 3.1   | 3.0   | 4.6   | 4.2   |
| Serpina9     | 26.4   | 20.6   | 23.8  | 26.4   | 32.3   | 23.2   | 25.9   | 31.7  | 54.5  | 33.0  | 42.6  | 54.6  |
| Serpina9b    | 295.4  | 133.1  | 58.7  | 225.3  | 109.0  | 240.2  | 60.1   | 48.2  | 43.8  | 87.4  | 129.2 | 99.8  |
| Serpina9c    | 0.1    | 0.0    | 0.0   | 0.3    | 0.0    | 0.0    | 0.0    | 0.0   | 0.0   | 0.0   | 0.0   | 0.0   |
| Serpina1     | 0.1    | 0.0    | 0.1   | 0.1    | 0.0    | 0.0    | 0.0    | 0.1   | 0.0   | 0.0   | 0.0   | 0.0   |
| Serpina1     | 1.5    | 1.2    | 0.8   | 2.1    | 3.7    | 1.2    | 2.8    | 1.4   | 1.8   | 2.3   | 1.4   | 1.4   |
| Serpina1     | 1136.3 | 1360.5 | 912.0 | 1589.6 | 1106.2 | 1667.2 | 1306.9 | 740.8 | 806.3 | 799.2 | 891.7 | 769.0 |
| Serpina2     | 126.0  | 158.0  | 165.5 | 93.6   | 164.6  | 118.0  | 105.7  | 110.5 | 93.2  | 76.0  | 82.0  | 97.7  |
| Serpina3     | 2.4    | 3.5    | 2.0   | 1.3    | 1.4    | 0.6    | 1.4    | 1.8   | 0.6   | 1.4   | 1.1   | 0.8   |

Online Table 1

|          |        |        |        |       |       |       |        |        |        |        |        |        |
|----------|--------|--------|--------|-------|-------|-------|--------|--------|--------|--------|--------|--------|
| Serpinf1 | 183.4  | 207.8  | 306.5  | 244.4 | 188.0 | 277.2 | 250.4  | 355.3  | 299.4  | 238.6  | 261.1  | 238.5  |
| Serpinf2 | 0.0    | 0.1    | 0.1    | 0.1   | 0.0   | 0.0   | 0.0    | 0.0    | 0.1    | 0.1    | 0.0    | 0.0    |
| Serping1 | 173.8  | 240.3  | 355.5  | 178.4 | 215.4 | 137.7 | 190.2  | 261.7  | 189.0  | 141.3  | 124.4  | 183.1  |
| Serpinh1 | 1054.5 | 1201.6 | 1295.3 | 964.9 | 975.8 | 908.3 | 1254.5 | 1671.3 | 1586.9 | 1384.1 | 1463.4 | 1275.9 |
| Serpini1 | 4.5    | 4.7    | 6.2    | 4.2   | 5.6   | 4.7   | 3.6    | 5.0    | 2.8    | 4.0    | 4.3    | 5.8    |
| Sertad1  | 16.3   | 13.7   | 12.2   | 16.4  | 16.4  | 12.9  | 19.3   | 16.8   | 18.0   | 20.2   | 17.5   | 14.1   |
| Sertad2  | 5.8    | 6.2    | 5.1    | 5.8   | 5.8   | 5.9   | 5.9    | 6.4    | 6.3    | 5.2    | 6.4    | 5.4    |
| Sertad3  | 4.0    | 4.2    | 3.8    | 2.6   | 3.0   | 4.0   | 4.3    | 4.8    | 4.0    | 3.1    | 3.1    | 3.8    |
| Sertad4  | 1.7    | 1.8    | 3.4    | 1.4   | 2.9   | 1.7   | 4.4    | 10.6   | 5.3    | 3.2    | 4.2    | 3.4    |
| Sesn1    | 6.5    | 7.5    | 9.2    | 5.4   | 6.3   | 6.9   | 5.2    | 7.8    | 7.7    | 8.1    | 7.9    | 7.1    |
| Sesn2    | 10.3   | 11.5   | 9.1    | 8.0   | 9.6   | 9.2   | 10.3   | 9.2    | 10.5   | 12.0   | 10.0   | 7.1    |
| Sesn3    | 8.7    | 11.9   | 14.5   | 6.8   | 9.0   | 7.2   | 10.1   | 12.6   | 10.8   | 13.7   | 12.6   | 12.2   |
| Sestd1   | 5.6    | 6.0    | 5.4    | 5.4   | 4.9   | 6.2   | 4.9    | 4.1    | 4.3    | 4.4    | 4.9    | 5.1    |
| Set      | 63.4   | 57.3   | 67.1   | 76.2  | 61.5  | 62.2  | 72.4   | 64.7   | 58.7   | 68.5   | 75.2   | 70.8   |
| Setbp1   | 2.2    | 3.3    | 4.3    | 2.6   | 2.3   | 2.9   | 3.3    | 4.0    | 3.8    | 3.3    | 2.9    | 4.0    |
| Setd1a   | 2.2    | 2.5    | 2.5    | 1.9   | 2.2   | 2.1   | 2.9    | 2.3    | 2.1    | 2.0    | 2.3    | 1.7    |
| Setd1b   | 0.1    | 0.3    | 0.4    | 0.3   | 0.3   | 0.1   | 0.4    | 0.4    | 0.3    | 0.3    | 0.2    | 0.2    |
| Setd2    | 9.1    | 10.3   | 11.2   | 7.5   | 8.4   | 7.7   | 9.4    | 10.3   | 8.6    | 8.6    | 10.0   | 9.8    |
| Setd3    | 64.1   | 52.6   | 48.9   | 75.5  | 51.6  | 72.7  | 54.5   | 43.5   | 45.3   | 47.3   | 55.3   | 55.9   |
| Setd4    | 0.7    | 1.1    | 0.8    | 0.5   | 0.9   | 1.1   | 1.1    | 0.8    | 1.2    | 0.7    | 0.7    | 0.8    |
| Setd5    | 9.4    | 12.6   | 14.0   | 8.9   | 10.8  | 10.1  | 13.5   | 14.5   | 12.6   | 9.7    | 10.7   | 11.1   |
| Setd6    | 6.7    | 7.1    | 6.9    | 8.4   | 5.1   | 9.8   | 5.4    | 6.8    | 4.7    | 5.9    | 6.8    | 5.8    |
| Setd7    | 20.5   | 22.4   | 24.2   | 26.9  | 20.7  | 23.1  | 17.7   | 20.1   | 17.8   | 22.1   | 19.6   | 20.9   |
| Setd8    | 28.5   | 29.8   | 31.5   | 34.3  | 25.4  | 33.3  | 31.3   | 29.6   | 23.1   | 22.6   | 32.6   | 28.5   |
| Setdb1   | 6.7    | 7.2    | 7.2    | 5.5   | 7.3   | 6.4   | 6.4    | 7.6    | 6.7    | 6.2    | 6.6    | 6.5    |
| Setdb2   | 2.2    | 2.1    | 3.0    | 3.0   | 2.2   | 1.7   | 2.2    | 2.3    | 2.1    | 1.8    | 2.7    | 2.1    |
| Setmar   | 1.1    | 1.2    | 1.5    | 1.1   | 1.1   | 1.6   | 1.3    | 1.4    | 1.1    | 1.2    | 1.5    | 1.2    |
| Setx     | 11.4   | 12.2   | 11.2   | 10.5  | 10.6  | 10.0  | 10.9   | 11.7   | 11.0   | 10.4   | 12.7   | 10.9   |
| Sez6l1   | 0.0    | 0.0    | 0.0    | 0.0   | 0.0   | 0.0   | 0.0    | 0.0    | 0.1    | 0.4    | 0.1    | 0.1    |
| Sez6l2   | 0.0    | 0.0    | 0.0    | 0.2   | 1.1   | 0.0   | 0.3    | 0.1    | 0.1    | 0.1    | 0.0    | 0.1    |
| Sf1      | 8.1    | 9.7    | 9.6    | 9.3   | 9.9   | 9.0   | 10.8   | 9.3    | 9.1    | 8.7    | 9.9    | 8.7    |
| Sf3a1    | 7.8    | 9.1    | 8.6    | 9.7   | 7.9   | 8.3   | 9.7    | 8.5    | 7.7    | 8.0    | 9.7    | 8.4    |
| Sf3a2    | 1.9    | 2.4    | 2.8    | 3.5   | 3.3   | 3.0   | 3.6    | 3.3    | 2.3    | 2.2    | 2.8    | 1.9    |
| Sf3a3    | 28.3   | 23.9   | 23.7   | 27.8  | 23.2  | 23.6  | 22.4   | 23.1   | 19.5   | 21.1   | 22.9   | 22.8   |
| Sf3b1    | 48.7   | 46.1   | 42.7   | 50.1  | 49.0  | 43.6  | 43.9   | 40.4   | 45.2   | 49.8   | 48.6   | 48.4   |
| Sf3b2    | 57.9   | 56.6   | 61.9   | 67.4  | 53.5  | 68.2  | 62.3   | 62.3   | 48.3   | 54.0   | 59.8   | 59.9   |
| Sf3b3    | 26.5   | 26.3   | 28.9   | 27.1  | 30.0  | 26.8  | 32.1   | 33.6   | 28.7   | 29.7   | 29.9   | 26.5   |
| Sf3b4    | 9.6    | 10.3   | 9.6    | 13.4  | 12.2  | 11.2  | 11.7   | 9.9    | 9.9    | 10.8   | 10.2   | 8.6    |
| Sf3b5    | 58.1   | 51.4   | 47.3   | 60.4  | 58.6  | 64.1  | 56.6   | 57.5   | 52.6   | 58.4   | 53.4   | 46.2   |
| Sfi1     | 3.5    | 3.1    | 3.0    | 3.0   | 2.8   | 3.4   | 2.6    | 2.5    | 3.2    | 2.5    | 3.1    | 2.7    |
| Sfmbt1   | 1.5    | 1.7    | 1.7    | 1.7   | 2.1   | 1.7   | 1.7    | 1.4    | 1.7    | 1.8    | 1.7    | 1.8    |
| Sfmbt2   | 0.3    | 0.3    | 0.2    | 0.5   | 0.3   | 0.4   | 0.2    | 0.2    | 0.2    | 0.4    | 0.5    | 0.3    |
| Sfn      | 2.0    | 1.2    | 1.0    | 2.3   | 1.7   | 1.4   | 1.4    | 1.3    | 1.2    | 1.4    | 1.3    | 1.3    |
| Sfpi1    | 1.7    | 0.0    | 0.0    | 10.5  | 20.9  | 0.0   | 2.7    | 0.3    | 0.5    | 1.3    | 0.5    | 1.4    |
| Sfpq     | 15.2   | 16.6   | 20.5   | 17.2  | 16.3  | 12.7  | 18.8   | 17.3   | 16.0   | 18.5   | 21.5   | 17.1   |
| Sfr1     | 70.4   | 68.5   | 81.5   | 76.8  | 61.5  | 72.5  | 81.9   | 93.8   | 67.2   | 67.9   | 91.8   | 88.6   |
| Sfrp1    | 44.4   | 141.5  | 460.5  | 31.5  | 122.7 | 51.2  | 202.6  | 435.6  | 280.2  | 232.1  | 224.0  | 348.9  |
| Sfrp2    | 4.3    | 4.5    | 18.7   | 1.2   | 2.2   | 0.9   | 2.0    | 25.0   | 6.9    | 4.6    | 3.0    | 5.9    |
| Sfrp4    | 1.6    | 0.7    | 0.3    | 0.5   | 0.1   | 0.5   | 0.1    | 0.1    | 0.1    | 0.5    | 0.6    | 0.3    |
| Sfrp5    | 0.0    | 0.0    | 0.1    | 0.0   | 0.0   | 0.0   | 0.0    | 0.0    | 0.0    | 0.0    | 0.0    | 0.0    |
| Sfrs18   | 11.3   | 12.7   | 17.5   | 12.1  | 10.6  | 11.6  | 13.7   | 13.2   | 12.9   | 11.3   | 12.9   | 13.9   |
| Sfswap   | 7.5    | 7.4    | 8.6    | 7.0   | 7.2   | 6.3   | 9.6    | 9.6    | 8.4    | 7.2    | 7.7    | 7.5    |
| Sft2d1   | 15.3   | 16.1   | 12.7   | 16.0  | 18.0  | 16.1  | 14.6   | 13.6   | 22.3   | 19.0   | 15.9   | 14.4   |
| Sft2d2   | 15.6   | 13.0   | 10.7   | 14.6  | 11.2  | 14.9  | 10.1   | 9.4    | 9.9    | 15.0   | 13.1   | 12.6   |
| Sft2d3   | 1.5    | 1.8    | 1.4    | 1.7   | 1.4   | 1.8   | 1.8    | 1.8    | 1.7    | 1.6    | 1.9    | 1.9    |
| Sftpb    | 0.0    | 0.1    | 0.0    | 0.0   | 0.0   | 0.0   | 0.0    | 0.0    | 0.0    | 0.0    | 0.0    | 0.0    |
| Sfxn1    | 13.1   | 12.3   | 8.8    | 12.5  | 10.3  | 14.5  | 10.4   | 11.0   | 11.1   | 11.8   | 12.5   | 10.0   |

Online Table 1

|          |       |       |       |       |       |       |       |       |       |       |       |       |
|----------|-------|-------|-------|-------|-------|-------|-------|-------|-------|-------|-------|-------|
| Sfxn2    | 2.3   | 1.7   | 1.4   | 2.3   | 2.4   | 1.6   | 2.1   | 2.4   | 2.4   | 2.0   | 2.3   | 2.4   |
| Sfxn3    | 13.4  | 15.0  | 11.9  | 15.0  | 14.2  | 13.8  | 15.0  | 17.2  | 13.4  | 12.8  | 13.3  | 9.7   |
| Sfxn4    | 1.2   | 0.9   | 1.2   | 1.0   | 0.7   | 1.5   | 0.6   | 0.8   | 0.8   | 0.6   | 0.7   | 1.0   |
| Sfxn5    | 0.9   | 1.0   | 1.2   | 1.4   | 1.6   | 1.2   | 1.1   | 1.0   | 1.1   | 1.5   | 0.7   | 1.0   |
| Sgca     | 0.1   | 0.1   | 0.1   | 0.1   | 0.0   | 0.3   | 0.2   | 0.0   | 0.1   | 0.1   | 0.0   | 0.0   |
| Sgcb     | 14.2  | 14.8  | 20.1  | 17.5  | 15.0  | 15.6  | 13.3  | 17.0  | 13.6  | 10.9  | 13.2  | 16.5  |
| Sgcd     | 6.6   | 4.2   | 6.2   | 4.7   | 4.8   | 6.0   | 4.5   | 3.4   | 4.7   | 5.5   | 6.7   | 4.7   |
| Sgce     | 62.0  | 58.5  | 61.9  | 60.5  | 56.5  | 62.8  | 69.7  | 74.9  | 67.0  | 54.0  | 64.3  | 66.9  |
| Sgcg     | 0.0   | 0.0   | 0.0   | 0.0   | 0.0   | 0.0   | 0.0   | 0.0   | 0.0   | 0.0   | 0.0   | 0.0   |
| Sgcz     | 0.0   | 0.0   | 0.0   | 0.0   | 0.0   | 0.0   | 0.0   | 0.0   | 0.0   | 0.0   | 0.0   | 0.0   |
| Sgip1    | 0.2   | 0.1   | 0.1   | 0.2   | 0.2   | 0.4   | 0.1   | 0.1   | 0.0   | 0.0   | 0.0   | 0.0   |
| Sgk1     | 13.8  | 18.3  | 20.7  | 15.1  | 23.1  | 10.4  | 36.6  | 35.7  | 26.6  | 42.0  | 33.2  | 37.6  |
| Sgk2     | 0.0   | 0.0   | 0.0   | 0.0   | 0.0   | 0.0   | 0.0   | 0.0   | 0.0   | 0.0   | 0.0   | 0.0   |
| Sgk3     | 2.8   | 3.0   | 3.1   | 2.8   | 3.5   | 2.2   | 2.7   | 2.8   | 2.9   | 3.2   | 3.4   | 3.2   |
| Sgms1    | 6.6   | 5.8   | 6.2   | 8.6   | 7.5   | 7.0   | 9.2   | 8.1   | 7.3   | 7.9   | 9.9   | 6.5   |
| Sgms2    | 8.6   | 7.9   | 5.8   | 7.5   | 6.7   | 9.7   | 8.5   | 6.2   | 5.9   | 5.8   | 8.4   | 6.6   |
| Sgol1    | 0.7   | 1.8   | 2.3   | 0.4   | 2.1   | 0.3   | 2.6   | 1.0   | 2.0   | 1.1   | 1.5   | 1.4   |
| Sgol2    | 1.4   | 2.6   | 4.5   | 0.5   | 3.1   | 0.9   | 3.9   | 1.6   | 2.8   | 1.5   | 2.7   | 1.7   |
| Sgpl1    | 48.7  | 44.4  | 33.6  | 54.2  | 52.8  | 51.4  | 37.5  | 30.0  | 35.0  | 46.7  | 39.5  | 41.4  |
| Sgpp1    | 15.6  | 17.8  | 22.7  | 21.0  | 15.5  | 19.6  | 17.7  | 20.2  | 18.2  | 19.7  | 21.4  | 24.1  |
| Sgpp2    | 0.1   | 0.1   | 0.1   | 0.1   | 0.0   | 0.1   | 0.1   | 0.0   | 0.0   | 0.1   | 0.1   | 0.1   |
| Sgsh     | 13.9  | 11.9  | 11.2  | 15.2  | 11.7  | 18.3  | 12.0  | 10.0  | 9.9   | 11.5  | 11.1  | 10.5  |
| Sgsm1    | 1.2   | 1.7   | 1.3   | 1.1   | 1.0   | 2.1   | 1.8   | 1.3   | 1.0   | 1.0   | 1.1   | 0.8   |
| Sgsm2    | 3.4   | 3.9   | 3.5   | 3.0   | 3.0   | 4.4   | 2.8   | 3.6   | 3.2   | 3.3   | 3.1   | 3.0   |
| Sgsm3    | 4.8   | 4.2   | 3.4   | 4.4   | 4.1   | 5.5   | 4.3   | 4.4   | 3.9   | 4.1   | 3.7   | 3.8   |
| Sgta     | 24.1  | 24.6  | 24.4  | 26.9  | 24.9  | 27.3  | 28.7  | 27.1  | 22.6  | 21.7  | 23.5  | 22.1  |
| Sgtb     | 3.1   | 3.1   | 3.0   | 2.9   | 1.9   | 3.5   | 3.1   | 3.3   | 3.2   | 3.3   | 3.4   | 3.5   |
| Sh2b1    | 4.6   | 4.4   | 4.2   | 4.6   | 4.6   | 5.0   | 5.2   | 4.5   | 5.1   | 5.2   | 4.6   | 4.2   |
| Sh2b2    | 1.0   | 1.2   | 1.7   | 1.2   | 2.1   | 1.0   | 2.3   | 1.9   | 2.0   | 1.6   | 1.4   | 1.3   |
| Sh2b3    | 7.2   | 6.6   | 5.9   | 6.0   | 8.4   | 7.1   | 7.3   | 5.9   | 7.1   | 6.7   | 6.3   | 6.1   |
| Sh2d1b1  | 0.2   | 0.0   | 0.0   | 1.2   | 5.1   | 0.0   | 0.7   | 0.0   | 0.1   | 0.6   | 0.2   | 0.6   |
| Sh2d2a   | 0.0   | 0.0   | 0.0   | 0.0   | 0.0   | 0.0   | 0.0   | 0.0   | 0.0   | 0.0   | 0.0   | 0.0   |
| Sh2d3c   | 0.3   | 0.3   | 0.3   | 1.0   | 1.0   | 0.1   | 0.2   | 0.3   | 0.3   | 0.2   | 0.1   | 0.1   |
| Sh2d4a   | 6.5   | 5.1   | 5.5   | 9.1   | 4.9   | 6.4   | 5.5   | 4.5   | 5.1   | 2.2   | 4.4   | 2.7   |
| Sh2d4b   | 0.1   | 0.1   | 0.2   | 0.0   | 0.1   | 0.1   | 0.2   | 0.0   | 0.0   | 0.0   | 0.0   | 0.0   |
| Sh2d5    | 0.0   | 0.0   | 0.1   | 0.0   | 0.1   | 0.0   | 0.1   | 0.0   | 0.1   | 0.1   | 0.1   | 0.1   |
| Sh2d7    | 0.1   | 0.0   | 0.1   | 0.1   | 0.1   | 0.1   | 0.0   | 0.0   | 0.1   | 0.1   | 0.0   | 0.0   |
| Sh3bgr   | 1.7   | 1.8   | 1.1   | 1.6   | 0.9   | 1.8   | 1.1   | 0.5   | 1.3   | 2.9   | 3.6   | 1.7   |
| Sh3bgrl  | 70.9  | 78.2  | 105.2 | 112.3 | 94.3  | 100.9 | 87.8  | 79.3  | 94.8  | 101.1 | 126.4 | 128.0 |
| Sh3bgrl2 | 0.6   | 0.2   | 0.5   | 2.7   | 2.9   | 0.2   | 0.5   | 0.4   | 0.2   | 0.7   | 0.2   | 0.6   |
| Sh3bgrl3 | 155.2 | 129.5 | 116.3 | 233.8 | 260.4 | 177.5 | 179.1 | 128.4 | 122.7 | 131.5 | 143.1 | 134.7 |
| Sh3bp1   | 4.2   | 4.8   | 4.2   | 4.8   | 5.1   | 3.5   | 4.2   | 3.5   | 3.4   | 3.6   | 3.1   | 2.9   |
| Sh3bp2   | 4.4   | 5.0   | 5.1   | 7.1   | 10.8  | 3.7   | 7.2   | 7.5   | 6.2   | 4.5   | 4.8   | 4.5   |
| Sh3bp4   | 3.2   | 3.5   | 2.7   | 3.7   | 3.4   | 3.5   | 3.5   | 3.4   | 3.6   | 5.2   | 4.8   | 2.9   |
| Sh3bp5   | 16.9  | 17.1  | 24.3  | 17.2  | 18.4  | 18.6  | 21.6  | 19.8  | 17.2  | 15.0  | 16.5  | 19.1  |
| Sh3bp5l  | 8.6   | 8.1   | 7.8   | 8.2   | 7.9   | 7.3   | 9.1   | 9.3   | 10.0  | 7.8   | 9.0   | 7.7   |
| Sh3d19   | 21.0  | 21.5  | 21.9  | 29.7  | 20.3  | 28.0  | 20.8  | 17.1  | 14.2  | 16.8  | 18.4  | 16.4  |
| Sh3d21   | 0.8   | 0.9   | 0.8   | 0.3   | 0.3   | 1.0   | 0.4   | 1.0   | 0.4   | 1.4   | 1.1   | 1.2   |
| Sh3gl1   | 21.7  | 23.4  | 25.1  | 23.2  | 26.6  | 20.0  | 30.5  | 33.3  | 32.2  | 25.6  | 24.4  | 24.2  |
| Sh3gl3   | 1.4   | 0.8   | 0.4   | 1.5   | 0.8   | 2.3   | 0.7   | 0.3   | 0.5   | 0.6   | 1.5   | 0.9   |
| Sh3glb1  | 48.9  | 49.2  | 47.0  | 60.4  | 48.8  | 52.5  | 53.3  | 47.6  | 50.1  | 46.1  | 63.3  | 58.1  |
| Sh3glb2  | 25.7  | 21.5  | 17.7  | 27.4  | 19.4  | 24.4  | 19.1  | 17.7  | 18.4  | 26.8  | 24.0  | 19.0  |
| Sh3kbp1  | 2.4   | 1.7   | 1.8   | 5.2   | 4.8   | 4.1   | 3.7   | 2.2   | 2.3   | 8.1   | 7.8   | 5.4   |
| Sh3pxd2a | 26.2  | 23.5  | 22.1  | 26.9  | 27.2  | 28.9  | 28.4  | 25.5  | 24.1  | 21.8  | 24.5  | 22.1  |
| Sh3pxd2b | 3.2   | 4.8   | 4.7   | 4.4   | 6.7   | 4.6   | 4.2   | 4.6   | 4.8   | 5.1   | 4.0   | 5.0   |
| Sh3rf1   | 7.2   | 7.2   | 6.4   | 7.6   | 8.0   | 6.4   | 8.9   | 4.7   | 6.7   | 13.9  | 10.0  | 10.5  |
| Sh3rf2   | 0.1   | 0.1   | 0.1   | 0.1   | 0.1   | 0.1   | 0.1   | 0.1   | 0.0   | 0.2   | 0.2   | 0.1   |

Online Table 1

|         |       |       |       |       |       |       |       |       |       |       |       |       |
|---------|-------|-------|-------|-------|-------|-------|-------|-------|-------|-------|-------|-------|
| Sh3rf3  | 0.9   | 1.5   | 1.9   | 1.1   | 1.3   | 0.7   | 1.5   | 2.4   | 1.7   | 1.4   | 1.4   | 1.3   |
| Sh3tc1  | 0.8   | 0.3   | 0.3   | 1.0   | 1.6   | 0.6   | 0.3   | 0.3   | 0.3   | 0.9   | 0.3   | 0.3   |
| Sh3tc2  | 7.4   | 7.0   | 5.4   | 5.5   | 5.3   | 6.1   | 6.0   | 6.8   | 8.0   | 8.7   | 8.6   | 6.5   |
| Sh3yl1  | 4.0   | 4.3   | 4.6   | 2.4   | 3.3   | 3.6   | 3.3   | 3.3   | 3.0   | 3.1   | 3.0   | 2.8   |
| Shank1  | 0.0   | 0.0   | 0.0   | 0.0   | 0.0   | 0.0   | 0.0   | 0.0   | 0.0   | 0.0   | 0.0   | 0.0   |
| Shank2  | 0.1   | 0.1   | 0.2   | 0.1   | 0.1   | 0.3   | 0.1   | 0.2   | 0.1   | 0.0   | 0.1   | 0.1   |
| Shank3  | 0.4   | 0.5   | 0.4   | 0.6   | 0.3   | 0.4   | 0.7   | 0.4   | 0.6   | 0.5   | 0.4   | 0.5   |
| Sharpin | 13.2  | 11.4  | 12.6  | 16.1  | 12.6  | 14.2  | 14.5  | 14.2  | 11.8  | 12.1  | 12.8  | 11.5  |
| Shb     | 6.6   | 5.2   | 4.8   | 3.8   | 4.1   | 3.1   | 4.8   | 4.2   | 4.7   | 9.5   | 5.8   | 4.5   |
| Shc1    | 60.0  | 63.7  | 61.9  | 53.7  | 64.6  | 57.3  | 60.5  | 58.3  | 58.8  | 79.9  | 63.2  | 63.3  |
| Shc2    | 17.6  | 13.7  | 11.0  | 24.6  | 11.4  | 28.8  | 10.7  | 9.5   | 8.3   | 9.3   | 11.3  | 11.4  |
| Shc3    | 0.4   | 0.3   | 0.3   | 0.4   | 0.3   | 0.6   | 0.2   | 0.1   | 0.1   | 0.1   | 0.0   | 0.2   |
| Shc4    | 0.6   | 0.4   | 0.3   | 0.6   | 0.5   | 0.8   | 0.5   | 0.4   | 0.5   | 0.8   | 0.8   | 0.8   |
| Shcbp1  | 1.2   | 3.3   | 5.8   | 0.5   | 4.3   | 0.3   | 5.2   | 2.0   | 3.9   | 2.0   | 3.6   | 2.3   |
| Shd     | 0.1   | 0.1   | 0.2   | 0.1   | 0.0   | 0.1   | 0.0   | 0.0   | 0.2   | 0.0   | 0.0   | 0.1   |
| She     | 0.1   | 0.1   | 0.1   | 0.0   | 0.0   | 0.0   | 0.1   | 0.1   | 0.1   | 0.1   | 0.0   | 0.0   |
| Shf     | 1.4   | 2.3   | 2.6   | 1.2   | 1.6   | 1.5   | 2.1   | 3.1   | 2.5   | 2.1   | 2.5   | 2.5   |
| Shfm1   | 261.0 | 201.9 | 236.9 | 260.8 | 204.0 | 237.4 | 248.0 | 223.1 | 194.1 | 238.7 | 250.4 | 277.5 |
| Shisa2  | 0.3   | 0.6   | 0.4   | 0.2   | 0.2   | 0.2   | 0.1   | 0.1   | 0.1   | 0.1   | 0.2   | 0.1   |
| Shisa4  | 20.5  | 18.6  | 18.1  | 24.6  | 17.3  | 32.6  | 17.3  | 19.3  | 17.1  | 23.2  | 24.3  | 14.9  |
| Shisa5  | 98.4  | 91.4  | 85.1  | 129.7 | 102.7 | 112.9 | 101.8 | 96.0  | 93.1  | 81.0  | 83.2  | 91.9  |
| Shisa6  | 0.0   | 0.1   | 0.1   | 0.0   | 0.1   | 0.0   | 0.1   | 0.2   | 0.2   | 0.0   | 0.1   | 0.2   |
| Shisa9  | 0.0   | 0.0   | 0.0   | 0.0   | 0.0   | 0.0   | 0.0   | 0.0   | 0.0   | 0.0   | 0.0   | 0.0   |
| Shkbp1  | 3.0   | 2.6   | 2.6   | 3.8   | 3.0   | 2.6   | 2.6   | 3.0   | 3.0   | 3.3   | 2.4   | 2.7   |
| Shmt1   | 1.6   | 1.6   | 1.6   | 0.6   | 1.3   | 0.9   | 1.5   | 1.0   | 1.1   | 1.4   | 1.2   | 1.6   |
| Shmt2   | 19.2  | 13.5  | 12.8  | 18.7  | 12.9  | 18.7  | 18.6  | 22.4  | 16.5  | 11.9  | 16.5  | 11.3  |
| Shoc2   | 19.1  | 19.0  | 18.9  | 20.7  | 18.6  | 20.6  | 21.3  | 19.6  | 20.6  | 18.7  | 24.4  | 22.3  |
| Shox2   | 2.7   | 1.6   | 1.8   | 3.3   | 1.9   | 1.8   | 2.2   | 2.3   | 2.4   | 2.3   | 1.8   | 1.7   |
| Shpk    | 2.1   | 2.3   | 1.8   | 1.7   | 2.3   | 1.8   | 1.8   | 1.6   | 1.8   | 1.6   | 1.5   | 1.6   |
| Shprh   | 6.4   | 6.4   | 6.2   | 6.8   | 5.5   | 6.6   | 5.4   | 5.9   | 5.7   | 7.0   | 6.4   | 6.0   |
| Shq1    | 2.8   | 2.4   | 1.9   | 2.4   | 2.4   | 2.5   | 1.8   | 1.8   | 2.0   | 2.3   | 1.9   | 1.9   |
| Shroom1 | 1.3   | 1.2   | 1.6   | 0.7   | 0.9   | 1.2   | 1.1   | 1.4   | 1.3   | 1.1   | 1.5   | 1.1   |
| Shroom2 | 6.8   | 6.0   | 4.9   | 4.1   | 3.9   | 3.6   | 4.0   | 3.1   | 3.4   | 7.8   | 6.5   | 5.4   |
| Shroom3 | 4.6   | 5.4   | 5.5   | 3.4   | 3.6   | 2.5   | 3.5   | 3.8   | 3.7   | 6.6   | 4.3   | 3.8   |
| Shroom4 | 0.9   | 1.0   | 1.0   | 0.5   | 0.6   | 0.7   | 0.8   | 0.7   | 0.8   | 1.3   | 0.8   | 0.8   |
| Siae    | 6.8   | 7.1   | 8.1   | 6.1   | 6.8   | 8.3   | 5.8   | 7.6   | 6.9   | 6.2   | 5.6   | 6.7   |
| Siah1a  | 5.1   | 5.0   | 5.4   | 5.3   | 4.6   | 5.9   | 4.6   | 4.6   | 6.0   | 5.9   | 5.3   | 5.8   |
| Siah1b  | 1.1   | 1.0   | 1.2   | 0.7   | 1.1   | 0.6   | 1.5   | 1.3   | 1.1   | 1.2   | 2.0   | 1.0   |
| Siah2   | 3.5   | 3.6   | 2.8   | 3.5   | 3.4   | 2.8   | 3.4   | 3.1   | 3.7   | 3.2   | 3.9   | 2.8   |
| Sidt1   | 0.0   | 0.0   | 0.0   | 0.0   | 0.0   | 0.0   | 0.0   | 0.0   | 0.0   | 0.0   | 0.0   | 0.0   |
| Sidt2   | 34.7  | 38.2  | 34.8  | 33.2  | 36.2  | 35.1  | 39.6  | 33.8  | 37.1  | 35.9  | 34.4  | 33.2  |
| Sigirr  | 0.1   | 0.1   | 0.0   | 0.0   | 0.1   | 0.0   | 0.0   | 0.1   | 0.2   | 0.0   | 0.0   | 0.0   |
| Siglec1 | 0.1   | 0.0   | 0.0   | 0.4   | 0.4   | 0.0   | 0.0   | 0.0   | 0.0   | 0.1   | 0.0   | 0.0   |
| Siglec5 | 0.0   | 0.0   | 0.1   | 0.0   | 0.0   | 0.0   | 0.0   | 0.1   | 0.1   | 0.0   | 0.0   | 0.0   |
| Siglece | 0.2   | 0.0   | 0.0   | 1.4   | 5.7   | 0.0   | 1.3   | 0.1   | 0.1   | 0.4   | 0.2   | 0.2   |
| Siglecg | 16.3  | 15.9  | 7.1   | 15.4  | 11.2  | 12.1  | 15.6  | 5.5   | 8.9   | 5.0   | 9.9   | 5.7   |
| Sigmar1 | 18.9  | 18.2  | 17.0  | 19.7  | 19.8  | 16.2  | 30.1  | 29.6  | 23.9  | 17.7  | 23.4  | 18.7  |
| Sik1    | 3.2   | 4.0   | 3.5   | 2.7   | 2.5   | 3.9   | 2.2   | 3.3   | 3.0   | 3.0   | 2.2   | 2.8   |
| Sik2    | 5.3   | 6.3   | 6.2   | 5.7   | 5.5   | 6.0   | 5.3   | 5.3   | 4.6   | 5.2   | 4.9   | 4.8   |
| Sik3    | 3.1   | 3.5   | 3.3   | 2.7   | 2.7   | 3.6   | 3.3   | 2.8   | 2.9   | 2.9   | 3.1   | 2.6   |
| Sike1   | 10.5  | 9.2   | 9.8   | 9.9   | 9.5   | 9.2   | 8.6   | 9.6   | 10.0  | 9.2   | 9.3   | 9.3   |
| Sil1    | 50.2  | 41.8  | 40.0  | 56.3  | 36.8  | 59.9  | 45.0  | 41.2  | 36.7  | 38.8  | 40.6  | 46.7  |
| Sim2    | 0.0   | 0.0   | 0.0   | 0.0   | 0.0   | 0.0   | 0.0   | 0.0   | 0.0   | 0.3   | 0.2   | 0.0   |
| Simc1   | 3.3   | 3.4   | 3.2   | 3.0   | 2.7   | 3.4   | 4.0   | 3.1   | 3.0   | 3.1   | 4.0   | 3.7   |
| Sin3a   | 6.9   | 8.1   | 9.9   | 7.2   | 7.6   | 7.3   | 9.0   | 10.6  | 8.2   | 7.7   | 8.5   | 8.7   |
| Sin3b   | 71.2  | 68.9  | 57.7  | 66.1  | 59.2  | 59.1  | 59.1  | 63.0  | 63.2  | 62.5  | 56.0  | 59.1  |
| Sipa1   | 2.7   | 3.7   | 3.6   | 3.6   | 6.1   | 2.7   | 4.4   | 4.0   | 4.5   | 3.9   | 3.5   | 3.1   |

Online Table 1

|         |       |       |       |       |       |       |       |       |       |       |       |       |
|---------|-------|-------|-------|-------|-------|-------|-------|-------|-------|-------|-------|-------|
| Sipa111 | 20.6  | 23.4  | 22.7  | 18.7  | 20.0  | 16.4  | 34.1  | 27.9  | 33.4  | 26.6  | 32.1  | 31.1  |
| Sipa112 | 2.7   | 3.0   | 3.1   | 2.6   | 4.8   | 1.9   | 4.7   | 3.6   | 3.9   | 5.5   | 4.4   | 4.1   |
| Sipa113 | 0.8   | 1.2   | 1.0   | 0.8   | 1.1   | 1.0   | 1.6   | 0.9   | 1.0   | 1.0   | 1.1   | 0.7   |
| Sirpa   | 12.7  | 10.5  | 12.1  | 32.7  | 40.4  | 11.7  | 11.4  | 9.8   | 8.1   | 8.5   | 7.2   | 9.5   |
| Sirpb1a | 0.1   | 0.0   | 0.0   | 0.2   | 1.9   | 0.0   | 0.1   | 0.0   | 0.0   | 0.0   | 0.0   | 0.0   |
| Sirpb1b | 0.3   | 0.0   | 0.0   | 0.3   | 3.0   | 0.0   | 0.1   | 0.0   | 0.0   | 0.0   | 0.0   | 0.0   |
| Sirt1   | 3.2   | 2.8   | 2.7   | 2.4   | 2.7   | 2.8   | 2.1   | 2.8   | 2.7   | 3.1   | 2.7   | 3.1   |
| Sirt2   | 43.4  | 38.3  | 35.6  | 50.6  | 40.8  | 49.3  | 40.1  | 39.5  | 33.1  | 36.8  | 39.3  | 43.2  |
| Sirt3   | 4.8   | 4.4   | 3.4   | 5.6   | 3.6   | 5.9   | 3.4   | 3.2   | 4.1   | 3.4   | 3.0   | 3.1   |
| Sirt4   | 2.6   | 3.1   | 3.7   | 2.6   | 3.3   | 3.5   | 2.7   | 3.4   | 3.1   | 2.7   | 2.8   | 2.8   |
| Sirt5   | 3.3   | 2.9   | 3.1   | 4.6   | 2.8   | 4.0   | 4.0   | 3.4   | 3.1   | 2.7   | 2.7   | 3.8   |
| Sirt6   | 3.2   | 3.0   | 3.2   | 3.5   | 3.7   | 3.9   | 3.1   | 3.3   | 3.2   | 3.5   | 2.6   | 2.8   |
| Sirt7   | 6.5   | 7.3   | 5.3   | 7.9   | 7.9   | 6.0   | 6.2   | 6.6   | 7.1   | 6.5   | 7.0   | 6.4   |
| Siva1   | 33.3  | 28.7  | 24.3  | 24.3  | 24.9  | 32.4  | 22.3  | 20.3  | 25.4  | 31.3  | 26.2  | 24.3  |
| Six1    | 1.0   | 1.1   | 0.8   | 1.5   | 1.0   | 1.4   | 1.3   | 0.9   | 1.0   | 1.4   | 1.7   | 1.8   |
| Six2    | 0.2   | 0.1   | 0.0   | 0.4   | 0.2   | 0.2   | 0.3   | 0.1   | 0.1   | 0.1   | 0.1   | 0.0   |
| Six4    | 2.1   | 2.3   | 2.0   | 2.4   | 2.3   | 2.4   | 1.7   | 1.9   | 1.7   | 2.3   | 2.0   | 2.1   |
| Six5    | 1.9   | 2.3   | 2.3   | 1.8   | 1.7   | 2.0   | 2.1   | 2.8   | 2.6   | 2.3   | 2.1   | 1.8   |
| Ska1    | 0.2   | 0.6   | 1.1   | 0.1   | 0.9   | 0.1   | 0.9   | 0.5   | 1.0   | 0.3   | 0.7   | 0.3   |
| Ska2    | 6.7   | 7.7   | 7.9   | 6.2   | 6.1   | 4.6   | 8.6   | 6.0   | 7.2   | 7.7   | 9.3   | 7.1   |
| Ska3    | 1.2   | 2.0   | 2.1   | 0.7   | 2.1   | 0.6   | 2.6   | 1.3   | 2.2   | 1.2   | 1.9   | 1.1   |
| Skap1   | 0.1   | 0.1   | 0.2   | 0.2   | 0.2   | 0.3   | 0.2   | 0.0   | 0.1   | 0.2   | 0.2   | 0.1   |
| Skap2   | 28.0  | 20.9  | 21.6  | 39.1  | 43.3  | 24.1  | 27.1  | 22.7  | 25.7  | 40.3  | 33.8  | 37.0  |
| Ski     | 22.9  | 29.8  | 29.3  | 21.3  | 25.6  | 21.7  | 31.9  | 31.4  | 31.3  | 24.6  | 25.1  | 23.7  |
| Skida1  | 0.5   | 0.6   | 0.7   | 0.8   | 0.3   | 0.5   | 0.6   | 1.0   | 0.7   | 0.8   | 0.6   | 0.7   |
| Skil    | 11.1  | 10.7  | 10.7  | 12.1  | 13.8  | 9.7   | 12.6  | 11.2  | 12.7  | 11.1  | 12.4  | 13.4  |
| Skiv2l  | 10.7  | 11.2  | 10.9  | 9.4   | 10.0  | 10.4  | 10.3  | 12.3  | 10.9  | 10.1  | 8.9   | 9.4   |
| Skiv2l2 | 19.9  | 20.9  | 20.0  | 21.1  | 18.9  | 19.4  | 17.8  | 19.4  | 16.5  | 18.4  | 18.9  | 19.2  |
| Skor1   | 0.0   | 0.0   | 0.1   | 0.0   | 0.0   | 0.0   | 0.0   | 0.0   | 0.0   | 0.0   | 0.0   | 0.0   |
| Skor2   | 0.0   | 0.0   | 0.0   | 0.0   | 0.0   | 0.0   | 0.0   | 0.0   | 0.0   | 0.0   | 0.0   | 0.0   |
| Skp1a   | 210.4 | 195.4 | 168.8 | 174.7 | 176.8 | 185.3 | 137.3 | 143.8 | 154.7 | 212.2 | 191.7 | 186.5 |
| Skp2    | 1.3   | 1.7   | 2.5   | 1.2   | 1.8   | 1.2   | 2.2   | 2.2   | 1.9   | 1.7   | 2.4   | 1.5   |
| Sla     | 0.5   | 0.4   | 0.2   | 1.6   | 3.1   | 0.2   | 1.8   | 1.0   | 1.2   | 0.5   | 0.4   | 0.9   |
| Sla2    | 14.4  | 12.6  | 9.3   | 12.3  | 14.8  | 10.5  | 12.2  | 11.5  | 14.1  | 16.3  | 13.9  | 13.7  |
| Slain1  | 0.1   | 0.1   | 0.0   | 0.0   | 0.0   | 0.2   | 0.1   | 0.0   | 0.0   | 0.0   | 0.0   | 0.0   |
| Slain2  | 17.9  | 15.3  | 13.0  | 22.6  | 15.4  | 18.5  | 14.9  | 12.7  | 12.8  | 14.4  | 16.6  | 16.0  |
| Slamf6  | 0.0   | 0.0   | 0.0   | 0.0   | 0.0   | 0.0   | 0.0   | 0.0   | 0.0   | 0.0   | 0.0   | 0.0   |
| Slamf7  | 0.1   | 0.0   | 0.1   | 0.8   | 1.1   | 0.0   | 0.3   | 0.1   | 0.1   | 0.1   | 0.0   | 0.1   |
| Slamf8  | 0.2   | 0.1   | 0.2   | 0.5   | 1.3   | 0.2   | 0.5   | 0.1   | 0.2   | 0.3   | 0.1   | 0.1   |
| Slamf9  | 3.0   | 0.3   | 0.2   | 14.2  | 31.3  | 0.1   | 6.8   | 0.5   | 1.3   | 3.4   | 1.1   | 3.8   |
| Slbp    | 10.5  | 16.7  | 20.0  | 10.0  | 16.8  | 11.7  | 19.6  | 14.3  | 18.7  | 16.1  | 19.2  | 17.4  |
| Slc10a1 | 0.5   | 0.3   | 0.4   | 0.2   | 0.5   | 0.4   | 0.1   | 0.2   | 0.3   | 0.4   | 0.5   | 0.3   |
| Slc10a3 | 16.2  | 15.9  | 17.4  | 18.7  | 16.5  | 15.9  | 18.3  | 16.5  | 15.2  | 16.6  | 15.7  | 17.4  |
| Slc10a6 | 0.6   | 2.2   | 3.8   | 0.1   | 0.6   | 0.2   | 0.3   | 0.9   | 0.6   | 0.4   | 0.4   | 0.5   |
| Slc10a7 | 4.0   | 4.0   | 4.2   | 4.2   | 4.2   | 4.5   | 4.9   | 5.2   | 4.6   | 4.2   | 5.0   | 4.9   |
| Slc11a1 | 3.0   | 0.4   | 0.3   | 18.4  | 40.1  | 0.6   | 3.4   | 0.6   | 0.9   | 2.1   | 1.4   | 1.6   |
| Slc11a2 | 11.9  | 9.8   | 9.1   | 13.7  | 14.1  | 10.8  | 10.0  | 9.6   | 8.0   | 7.7   | 7.6   | 7.4   |
| Slc12a1 | 0.0   | 0.0   | 0.0   | 0.0   | 0.0   | 0.0   | 0.0   | 0.0   | 0.0   | 0.0   | 0.0   | 0.0   |
| Slc12a2 | 3.6   | 2.8   | 2.9   | 2.8   | 3.0   | 2.4   | 2.7   | 2.9   | 2.6   | 3.1   | 2.8   | 3.0   |
| Slc12a4 | 29.7  | 28.4  | 26.6  | 28.8  | 29.2  | 26.9  | 34.0  | 30.3  | 34.1  | 31.4  | 29.7  | 28.6  |
| Slc12a5 | 0.1   | 0.1   | 0.1   | 0.1   | 0.1   | 0.2   | 0.1   | 0.0   | 0.0   | 0.0   | 0.0   | 0.1   |
| Slc12a6 | 8.4   | 8.5   | 7.9   | 8.7   | 10.5  | 8.4   | 8.7   | 8.2   | 8.5   | 8.0   | 8.8   | 7.7   |
| Slc12a7 | 2.1   | 2.0   | 1.7   | 2.3   | 3.3   | 1.9   | 1.9   | 1.6   | 1.8   | 2.3   | 2.1   | 1.9   |
| Slc12a8 | 1.8   | 1.6   | 1.5   | 0.8   | 1.0   | 0.6   | 1.1   | 1.1   | 0.9   | 1.1   | 1.6   | 1.2   |
| Slc12a9 | 1.5   | 2.2   | 2.3   | 2.0   | 2.7   | 2.2   | 1.9   | 2.6   | 2.6   | 2.3   | 1.8   | 1.9   |
| Slc13a3 | 0.0   | 0.0   | 0.0   | 0.0   | 0.1   | 0.0   | 0.1   | 0.1   | 0.0   | 0.0   | 0.0   | 0.0   |
| Slc13a4 | 0.3   | 0.7   | 0.7   | 0.0   | 0.0   | 0.1   | 0.2   | 0.3   | 0.1   | 0.1   | 0.2   | 0.2   |

Online Table 1

|              |      |      |      |      |      |      |      |      |      |      |      |      |
|--------------|------|------|------|------|------|------|------|------|------|------|------|------|
| Slc13a5      | 0.0  | 0.1  | 0.0  | 0.1  | 0.0  | 0.1  | 0.1  | 0.1  | 0.1  | 0.0  | 0.2  | 0.1  |
| Slc14a2      | 0.0  | 0.1  | 0.0  | 0.1  | 0.0  | 0.1  | 0.1  | 0.0  | 0.0  | 0.0  | 0.0  | 0.0  |
| Slc15a1      | 0.1  | 0.0  | 0.0  | 0.1  | 0.1  | 0.0  | 0.1  | 0.0  | 0.0  | 0.0  | 0.1  | 0.1  |
| Slc15a2      | 0.1  | 0.0  | 0.0  | 0.0  | 0.0  | 0.1  | 0.0  | 0.1  | 0.0  | 0.0  | 0.1  | 0.1  |
| Slc15a3      | 2.2  | 0.5  | 0.9  | 12.1 | 25.5 | 1.3  | 4.1  | 0.5  | 0.8  | 1.9  | 0.7  | 1.9  |
| Slc15a4      | 12.0 | 11.9 | 7.6  | 13.3 | 14.2 | 12.8 | 10.5 | 9.6  | 9.5  | 10.4 | 9.0  | 9.9  |
| Slc15a5      | 0.0  | 0.0  | 0.0  | 0.0  | 0.0  | 0.0  | 0.0  | 0.0  | 0.0  | 0.0  | 0.0  | 0.0  |
| Slc16a1      | 9.1  | 9.3  | 11.1 | 5.4  | 4.8  | 5.7  | 4.6  | 5.9  | 5.0  | 9.2  | 7.4  | 7.0  |
| Slc16a10     | 1.5  | 1.4  | 2.0  | 1.5  | 2.5  | 0.9  | 0.9  | 0.8  | 0.7  | 0.7  | 0.6  | 0.8  |
| Slc16a11     | 0.0  | 0.0  | 0.0  | 0.3  | 0.0  | 0.0  | 0.1  | 0.1  | 0.1  | 0.2  | 0.2  | 0.1  |
| Slc16a12     | 0.0  | 0.0  | 0.0  | 0.0  | 0.0  | 0.0  | 0.0  | 0.0  | 0.0  | 0.0  | 0.0  | 0.0  |
| Slc16a13     | 0.8  | 0.7  | 0.6  | 0.9  | 0.6  | 1.3  | 0.7  | 0.7  | 0.6  | 1.2  | 0.8  | 0.8  |
| Slc16a2      | 4.5  | 5.4  | 8.5  | 4.5  | 6.7  | 3.5  | 5.4  | 5.8  | 3.8  | 3.0  | 2.3  | 3.9  |
| Slc16a3      | 3.8  | 4.4  | 2.8  | 4.8  | 12.5 | 4.9  | 7.3  | 2.9  | 6.4  | 5.1  | 4.2  | 5.3  |
| Slc16a4      | 3.0  | 3.5  | 4.6  | 1.6  | 2.6  | 1.4  | 2.0  | 4.2  | 4.3  | 8.8  | 7.1  | 6.3  |
| Slc16a5      | 0.6  | 0.4  | 0.4  | 0.4  | 0.5  | 0.4  | 0.5  | 0.4  | 0.5  | 0.4  | 0.5  | 0.2  |
| Slc16a6      | 0.4  | 0.3  | 0.5  | 0.7  | 0.9  | 0.4  | 0.4  | 0.5  | 0.3  | 0.3  | 0.5  | 0.5  |
| Slc16a7      | 0.2  | 0.2  | 0.3  | 0.3  | 0.4  | 0.0  | 0.3  | 0.3  | 0.2  | 0.3  | 0.2  | 0.2  |
| Slc16a8      | 0.0  | 0.1  | 0.0  | 0.2  | 0.0  | 0.0  | 0.0  | 0.1  | 0.1  | 0.1  | 0.0  | 0.0  |
| Slc16a9      | 2.1  | 2.6  | 3.9  | 2.1  | 2.1  | 3.2  | 2.7  | 2.5  | 2.4  | 2.4  | 2.0  | 2.7  |
| Slc17a5      | 4.4  | 4.9  | 4.9  | 5.1  | 5.0  | 5.7  | 4.0  | 4.9  | 4.2  | 4.7  | 4.7  | 4.7  |
| Slc17a7      | 0.0  | 0.1  | 0.1  | 0.1  | 0.1  | 0.1  | 0.0  | 0.0  | 0.0  | 0.0  | 0.0  | 0.0  |
| Slc17a8      | 0.0  | 0.0  | 0.0  | 0.0  | 0.0  | 0.0  | 0.0  | 0.0  | 0.0  | 0.0  | 0.0  | 0.0  |
| Slc17a9      | 1.7  | 0.9  | 0.6  | 2.2  | 1.0  | 1.0  | 0.9  | 0.5  | 0.7  | 0.7  | 1.1  | 1.0  |
| Slc18a1      | 0.2  | 0.1  | 0.1  | 0.2  | 0.2  | 0.2  | 0.1  | 0.1  | 0.2  | 0.1  | 0.2  | 0.2  |
| Slc18a2      | 0.5  | 1.0  | 0.9  | 0.7  | 0.7  | 0.7  | 1.0  | 1.2  | 0.9  | 0.9  | 1.4  | 0.9  |
| Slc18b1      | 2.5  | 3.2  | 3.0  | 2.9  | 2.9  | 3.7  | 3.0  | 3.0  | 2.7  | 3.3  | 2.7  | 2.9  |
| Slc19a1      | 1.4  | 1.9  | 1.5  | 1.8  | 1.5  | 1.6  | 2.2  | 2.5  | 2.2  | 1.4  | 1.7  | 1.7  |
| Slc19a2      | 14.0 | 13.4 | 11.8 | 11.8 | 12.9 | 15.8 | 10.7 | 9.1  | 11.4 | 16.0 | 12.3 | 11.2 |
| Slc19a3      | 0.5  | 0.4  | 0.3  | 0.3  | 0.2  | 0.4  | 0.3  | 0.2  | 0.3  | 0.1  | 0.3  | 0.2  |
| Slc1a1       | 0.0  | 0.0  | 0.0  | 0.0  | 0.0  | 0.0  | 0.0  | 0.0  | 0.0  | 0.0  | 0.0  | 0.0  |
| Slc1a2       | 0.1  | 0.2  | 0.2  | 0.4  | 0.3  | 0.2  | 0.1  | 0.2  | 0.1  | 0.3  | 0.3  | 0.1  |
| Slc1a3       | 7.4  | 13.7 | 21.9 | 9.2  | 11.8 | 6.4  | 12.9 | 26.9 | 15.1 | 8.9  | 12.1 | 12.1 |
| Slc1a4       | 14.0 | 9.8  | 8.6  | 15.3 | 12.8 | 14.6 | 16.7 | 17.3 | 16.4 | 9.9  | 14.0 | 9.9  |
| Slc1a5       | 19.0 | 22.6 | 29.1 | 11.8 | 13.3 | 18.8 | 21.2 | 38.7 | 33.4 | 11.2 | 15.9 | 15.6 |
| Slc1a6       | 16.8 | 17.3 | 10.0 | 21.4 | 12.2 | 26.7 | 21.8 | 8.6  | 23.3 | 16.5 | 18.1 | 18.4 |
| Slc1a7       | 0.1  | 0.1  | 0.1  | 0.0  | 0.1  | 0.0  | 0.1  | 0.1  | 0.1  | 0.1  | 0.1  | 0.1  |
| Slc20a1      | 13.0 | 10.6 | 8.6  | 17.7 | 14.6 | 13.1 | 14.9 | 13.3 | 15.3 | 13.2 | 11.8 | 11.9 |
| Slc20a2      | 10.8 | 8.3  | 6.4  | 15.3 | 8.7  | 12.3 | 11.8 | 7.8  | 8.9  | 10.7 | 10.1 | 8.8  |
| Slc22a13     | 0.0  | 0.0  | 0.0  | 0.1  | 0.0  | 0.0  | 0.0  | 0.0  | 0.0  | 0.0  | 0.0  | 0.0  |
| Slc22a13b-ps | 0.0  | 0.1  | 0.1  | 0.0  | 0.1  | 0.0  | 0.0  | 0.0  | 0.0  | 0.0  | 0.0  | 0.0  |
| Slc22a14     | 0.1  | 0.0  | 0.0  | 0.1  | 0.0  | 0.0  | 0.0  | 0.0  | 0.0  | 0.1  | 0.0  | 0.0  |
| Slc22a15     | 1.3  | 1.0  | 1.1  | 1.3  | 1.0  | 1.0  | 1.3  | 0.8  | 1.0  | 0.9  | 1.0  | 1.2  |
| Slc22a17     | 2.0  | 2.6  | 2.7  | 1.6  | 1.9  | 2.1  | 2.0  | 2.1  | 2.8  | 3.0  | 1.6  | 1.9  |
| Slc22a18     | 10.5 | 6.8  | 4.9  | 10.2 | 7.7  | 10.6 | 5.2  | 3.8  | 3.5  | 4.3  | 3.3  | 4.7  |
| Slc22a2      | 0.2  | 0.2  | 0.2  | 0.0  | 0.2  | 0.2  | 0.2  | 0.1  | 0.0  | 0.0  | 0.1  | 0.1  |
| Slc22a21     | 0.9  | 0.8  | 0.9  | 1.1  | 0.8  | 0.7  | 0.9  | 0.5  | 0.7  | 0.9  | 0.9  | 1.0  |
| Slc22a23     | 3.5  | 3.1  | 1.5  | 7.0  | 2.8  | 7.1  | 2.5  | 3.1  | 2.1  | 2.1  | 2.2  | 1.2  |
| Slc22a27     | 0.0  | 0.0  | 0.0  | 0.0  | 0.0  | 0.0  | 0.0  | 0.0  | 0.0  | 0.0  | 0.0  | 0.0  |
| Slc22a3      | 0.1  | 0.1  | 0.0  | 0.2  | 0.2  | 0.1  | 0.0  | 0.0  | 0.0  | 0.0  | 0.1  | 0.0  |
| Slc22a4      | 0.9  | 0.4  | 0.2  | 0.9  | 1.5  | 0.9  | 0.5  | 0.3  | 0.3  | 0.4  | 0.2  | 0.6  |
| Slc22a5      | 5.1  | 4.3  | 3.3  | 4.5  | 4.1  | 5.2  | 3.9  | 3.6  | 4.1  | 5.5  | 3.6  | 4.0  |
| Slc23a1      | 0.0  | 0.1  | 0.2  | 0.1  | 0.0  | 0.0  | 0.1  | 0.1  | 0.1  | 0.1  | 0.1  | 0.1  |
| Slc23a2      | 4.7  | 4.5  | 4.4  | 6.2  | 7.3  | 4.6  | 4.5  | 4.2  | 4.5  | 3.9  | 3.6  | 4.1  |
| Slc23a3      | 0.0  | 0.1  | 0.0  | 0.0  | 0.0  | 0.0  | 0.0  | 0.0  | 0.0  | 0.1  | 0.0  | 0.0  |
| Slc24a1      | 0.0  | 0.0  | 0.0  | 0.0  | 0.0  | 0.0  | 0.0  | 0.0  | 0.0  | 0.0  | 0.0  | 0.0  |
| Slc24a2      | 0.0  | 0.0  | 0.0  | 0.0  | 0.0  | 0.0  | 0.0  | 0.0  | 0.0  | 0.0  | 0.0  | 0.0  |

Online Table 1



|          |       |       |       |       |       |       |       |       |       |       |       |       |
|----------|-------|-------|-------|-------|-------|-------|-------|-------|-------|-------|-------|-------|
| Slc24a3  | 3.7   | 3.5   | 3.3   | 3.0   | 2.4   | 3.1   | 2.6   | 2.5   | 3.2   | 3.5   | 3.8   | 3.6   |
| Slc24a4  | 0.0   | 0.0   | 0.0   | 0.0   | 0.0   | 0.0   | 0.0   | 0.0   | 0.0   | 0.0   | 0.0   | 0.0   |
| Slc24a5  | 1.4   | 1.0   | 0.6   | 2.5   | 1.2   | 2.7   | 0.8   | 0.7   | 0.4   | 0.4   | 0.6   | 0.4   |
| Slc24a6  | 5.3   | 4.7   | 3.8   | 6.8   | 6.5   | 6.2   | 4.1   | 2.7   | 3.9   | 3.3   | 2.4   | 3.5   |
| Slc25a1  | 55.5  | 66.2  | 57.5  | 41.8  | 43.9  | 59.8  | 59.1  | 62.5  | 53.6  | 41.5  | 58.4  | 44.7  |
| Slc25a10 | 2.5   | 1.8   | 2.2   | 1.9   | 2.8   | 1.7   | 2.3   | 2.3   | 2.2   | 1.8   | 1.9   | 1.8   |
| Slc25a11 | 31.5  | 29.9  | 26.1  | 29.2  | 31.1  | 28.8  | 28.7  | 29.4  | 30.6  | 31.0  | 27.2  | 27.1  |
| Slc25a12 | 11.3  | 12.2  | 11.6  | 10.6  | 11.6  | 10.9  | 10.2  | 11.2  | 11.0  | 9.6   | 9.3   | 10.1  |
| Slc25a13 | 1.6   | 1.0   | 1.1   | 1.3   | 2.6   | 1.0   | 1.4   | 0.9   | 1.0   | 2.7   | 2.4   | 1.4   |
| Slc25a14 | 3.0   | 2.9   | 2.4   | 3.2   | 2.5   | 2.8   | 2.0   | 1.6   | 2.1   | 2.2   | 2.5   | 3.0   |
| Slc25a15 | 3.8   | 3.8   | 3.7   | 3.0   | 2.9   | 4.0   | 2.9   | 2.5   | 2.7   | 3.3   | 3.0   | 3.6   |
| Slc25a16 | 6.5   | 6.9   | 6.8   | 7.3   | 6.6   | 7.5   | 6.2   | 7.0   | 7.3   | 7.5   | 7.2   | 7.7   |
| Slc25a17 | 22.3  | 23.9  | 23.6  | 21.7  | 23.3  | 20.8  | 25.0  | 21.8  | 24.2  | 22.8  | 27.0  | 25.6  |
| Slc25a18 | 0.1   | 0.0   | 0.1   | 0.0   | 0.1   | 0.1   | 0.1   | 0.0   | 0.1   | 0.2   | 0.0   | 0.0   |
| Slc25a19 | 4.6   | 3.7   | 3.8   | 6.4   | 4.6   | 6.5   | 3.0   | 4.2   | 4.1   | 4.8   | 3.3   | 3.7   |
| Slc25a2  | 0.0   | 0.2   | 0.1   | 0.0   | 0.1   | 0.1   | 0.1   | 0.1   | 0.1   | 0.2   | 0.1   | 0.0   |
| Slc25a20 | 18.3  | 16.2  | 14.2  | 17.8  | 16.6  | 16.5  | 13.2  | 15.7  | 15.1  | 18.5  | 17.7  | 18.0  |
| Slc25a21 | 0.0   | 0.0   | 0.0   | 0.0   | 0.0   | 0.0   | 0.0   | 0.0   | 0.0   | 0.0   | 0.0   | 0.0   |
| Slc25a22 | 2.4   | 3.1   | 2.0   | 2.9   | 3.0   | 3.0   | 2.9   | 2.6   | 2.7   | 2.4   | 2.1   | 2.0   |
| Slc25a23 | 0.7   | 1.1   | 1.2   | 0.8   | 0.7   | 1.3   | 0.6   | 0.8   | 0.7   | 1.7   | 0.7   | 0.8   |
| Slc25a24 | 12.1  | 8.8   | 9.2   | 17.2  | 13.2  | 14.2  | 12.2  | 11.7  | 11.5  | 11.4  | 15.1  | 11.8  |
| Slc25a25 | 5.2   | 4.3   | 3.1   | 4.3   | 5.7   | 3.9   | 4.5   | 3.4   | 4.3   | 5.9   | 5.0   | 4.2   |
| Slc25a26 | 2.2   | 1.8   | 1.7   | 2.3   | 2.2   | 2.6   | 1.5   | 1.7   | 2.5   | 2.7   | 2.2   | 2.0   |
| Slc25a27 | 0.4   | 0.5   | 0.5   | 0.2   | 0.4   | 0.4   | 0.2   | 0.4   | 0.3   | 0.4   | 0.2   | 0.3   |
| Slc25a28 | 3.8   | 3.6   | 4.4   | 4.2   | 3.8   | 4.0   | 4.5   | 3.8   | 4.3   | 5.2   | 4.7   | 5.1   |
| Slc25a29 | 1.2   | 1.0   | 0.9   | 0.5   | 1.1   | 0.7   | 1.0   | 1.0   | 0.9   | 1.0   | 0.8   | 0.8   |
| Slc25a3  | 193.9 | 156.6 | 127.6 | 158.9 | 162.2 | 163.4 | 134.9 | 145.1 | 151.7 | 158.8 | 159.3 | 140.1 |
| Slc25a30 | 8.1   | 8.5   | 9.1   | 8.1   | 10.4  | 9.1   | 13.3  | 10.8  | 13.5  | 11.0  | 13.4  | 11.7  |
| Slc25a31 | 0.1   | 0.1   | 0.1   | 0.0   | 0.0   | 0.2   | 0.3   | 0.0   | 0.0   | 0.1   | 0.0   | 0.1   |
| Slc25a32 | 6.3   | 5.3   | 5.4   | 6.7   | 6.3   | 4.8   | 5.8   | 5.1   | 6.5   | 7.0   | 6.9   | 7.1   |
| Slc25a33 | 3.5   | 2.4   | 1.5   | 3.8   | 2.9   | 3.9   | 1.6   | 1.8   | 2.0   | 2.5   | 2.2   | 1.8   |
| Slc25a34 | 0.1   | 0.0   | 0.0   | 0.0   | 0.1   | 0.0   | 0.1   | 0.1   | 0.0   | 0.0   | 0.0   | 0.0   |
| Slc25a35 | 0.9   | 1.7   | 1.6   | 1.2   | 1.2   | 1.4   | 1.2   | 1.6   | 1.2   | 0.7   | 0.9   | 0.7   |
| Slc25a36 | 12.8  | 13.8  | 14.1  | 15.0  | 14.6  | 15.9  | 12.5  | 13.7  | 13.3  | 16.0  | 15.2  | 15.1  |
| Slc25a37 | 7.2   | 7.6   | 6.0   | 7.6   | 9.1   | 8.9   | 7.7   | 4.4   | 5.5   | 6.4   | 5.9   | 5.7   |
| Slc25a38 | 9.5   | 7.6   | 7.5   | 8.3   | 8.0   | 7.8   | 8.3   | 8.0   | 10.5  | 8.3   | 9.5   | 8.4   |
| Slc25a39 | 67.3  | 57.7  | 46.9  | 64.3  | 55.9  | 68.7  | 51.6  | 55.9  | 51.5  | 55.7  | 54.3  | 45.8  |
| Slc25a4  | 351.7 | 259.3 | 245.8 | 313.6 | 271.5 | 346.7 | 290.5 | 279.9 | 277.4 | 317.9 | 300.8 | 308.2 |
| Slc25a40 | 5.1   | 6.4   | 7.0   | 4.5   | 5.6   | 6.1   | 6.2   | 5.0   | 6.5   | 5.5   | 7.1   | 6.6   |
| Slc25a41 | 0.0   | 0.0   | 0.0   | 0.0   | 0.1   | 0.2   | 0.0   | 0.0   | 0.0   | 0.0   | 0.0   | 0.0   |
| Slc25a42 | 1.0   | 1.1   | 1.1   | 0.7   | 1.0   | 1.0   | 1.0   | 0.8   | 0.9   | 1.0   | 0.8   | 0.9   |
| Slc25a43 | 1.9   | 1.2   | 1.2   | 1.6   | 1.7   | 1.8   | 1.7   | 0.7   | 1.0   | 1.2   | 1.2   | 0.8   |
| Slc25a44 | 6.8   | 7.1   | 7.4   | 6.9   | 6.9   | 7.1   | 7.4   | 7.3   | 7.6   | 6.8   | 7.1   | 7.0   |
| Slc25a45 | 4.0   | 4.0   | 4.2   | 6.2   | 6.2   | 4.3   | 5.2   | 4.4   | 4.2   | 3.7   | 3.5   | 3.0   |
| Slc25a46 | 14.0  | 13.9  | 14.6  | 16.1  | 13.8  | 16.0  | 14.4  | 12.9  | 13.0  | 15.4  | 18.2  | 16.1  |
| Slc25a47 | 0.4   | 0.5   | 0.4   | 0.8   | 0.5   | 0.6   | 0.6   | 0.5   | 0.5   | 0.5   | 0.5   | 0.3   |
| Slc25a5  | 102.1 | 81.8  | 76.4  | 99.3  | 112.4 | 83.1  | 80.1  | 76.8  | 74.8  | 96.9  | 91.2  | 80.1  |
| Slc25a51 | 16.6  | 15.9  | 14.4  | 15.1  | 15.5  | 15.7  | 15.2  | 16.6  | 16.8  | 16.0  | 16.8  | 15.8  |
| Slc25a53 | 0.3   | 0.3   | 0.2   | 0.4   | 0.3   | 0.3   | 0.3   | 0.3   | 0.3   | 0.3   | 0.2   | 0.1   |
| Slc26a1  | 0.5   | 0.5   | 0.5   | 0.5   | 0.5   | 0.6   | 0.6   | 0.7   | 0.5   | 0.5   | 0.4   | 0.4   |
| Slc26a10 | 0.0   | 0.2   | 0.0   | 0.0   | 0.0   | 0.1   | 0.1   | 0.2   | 0.0   | 0.1   | 0.0   | 0.0   |
| Slc26a11 | 4.3   | 4.5   | 4.3   | 3.8   | 3.2   | 4.2   | 3.6   | 3.7   | 4.3   | 4.8   | 4.4   | 4.0   |
| Slc26a2  | 3.1   | 2.9   | 2.7   | 3.0   | 3.5   | 2.7   | 3.2   | 3.2   | 3.2   | 2.9   | 3.0   | 2.8   |
| Slc26a5  | 0.0   | 0.0   | 0.0   | 0.0   | 0.0   | 0.0   | 0.0   | 0.0   | 0.0   | 0.0   | 0.0   | 0.0   |
| Slc26a6  | 0.7   | 0.8   | 0.8   | 1.1   | 0.8   | 0.6   | 1.0   | 1.2   | 1.1   | 0.8   | 0.8   | 0.7   |
| Slc26a7  | 0.0   | 0.0   | 0.0   | 0.0   | 0.0   | 0.0   | 0.0   | 0.0   | 0.0   | 0.0   | 0.0   | 0.0   |
| Slc27a1  | 2.3   | 1.9   | 1.9   | 3.3   | 3.9   | 3.1   | 1.2   | 2.2   | 1.7   | 2.4   | 1.2   | 1.7   |

Online Table 1

|             |      |      |      |      |      |      |      |      |      |      |      |      |
|-------------|------|------|------|------|------|------|------|------|------|------|------|------|
| Slc27a3     | 3.5  | 6.5  | 7.3  | 1.8  | 4.7  | 2.7  | 5.7  | 10.1 | 6.8  | 3.5  | 3.6  | 2.9  |
| Slc27a4     | 8.9  | 9.2  | 8.5  | 8.7  | 8.8  | 7.7  | 9.9  | 10.2 | 10.3 | 10.0 | 10.4 | 8.6  |
| Slc27a5     | 0.0  | 0.1  | 0.0  | 0.0  | 0.0  | 0.0  | 0.1  | 0.0  | 0.0  | 0.0  | 0.0  | 0.0  |
| Slc27a6     | 0.1  | 0.3  | 0.1  | 0.1  | 0.0  | 0.1  | 0.0  | 0.1  | 0.1  | 0.1  | 0.3  | 0.1  |
| Slc28a1     | 0.0  | 0.0  | 0.1  | 0.0  | 0.0  | 0.0  | 0.0  | 0.0  | 0.0  | 0.0  | 0.0  | 0.0  |
| Slc28a2     | 0.1  | 0.0  | 0.0  | 0.1  | 0.4  | 0.0  | 0.2  | 0.1  | 0.0  | 0.1  | 0.1  | 0.2  |
| Slc28a3     | 0.0  | 0.0  | 0.0  | 0.0  | 0.0  | 0.0  | 0.0  | 0.0  | 0.0  | 0.0  | 0.0  | 0.0  |
| Slc29a1     | 12.4 | 13.9 | 16.0 | 13.0 | 16.6 | 18.6 | 21.4 | 25.5 | 21.1 | 18.8 | 18.7 | 16.9 |
| Slc29a2     | 0.2  | 0.3  | 0.2  | 0.3  | 0.2  | 0.3  | 0.1  | 0.3  | 0.2  | 0.2  | 0.2  | 0.1  |
| Slc29a3     | 3.5  | 4.3  | 4.3  | 5.0  | 5.0  | 5.0  | 4.7  | 4.7  | 4.2  | 4.1  | 4.1  | 3.5  |
| Slc29a4     | 0.1  | 0.0  | 0.0  | 0.0  | 0.1  | 0.0  | 0.1  | 0.0  | 0.0  | 0.0  | 0.0  | 0.0  |
| Slc2a1      | 11.1 | 11.9 | 11.5 | 12.7 | 17.5 | 16.6 | 16.6 | 9.0  | 13.8 | 14.2 | 12.7 | 11.6 |
| Slc2a10     | 5.7  | 5.2  | 4.6  | 5.1  | 5.4  | 5.3  | 6.1  | 6.3  | 6.0  | 4.1  | 4.9  | 4.6  |
| Slc2a12     | 0.1  | 0.1  | 0.2  | 0.1  | 0.1  | 0.1  | 0.1  | 0.2  | 0.1  | 0.2  | 0.1  | 0.2  |
| Slc2a13     | 1.9  | 1.6  | 1.8  | 1.6  | 1.4  | 1.3  | 2.2  | 1.5  | 1.9  | 2.2  | 2.3  | 2.7  |
| Slc2a2      | 0.3  | 0.3  | 0.3  | 0.8  | 0.3  | 0.3  | 0.4  | 0.5  | 0.3  | 0.4  | 0.4  | 0.5  |
| Slc2a3      | 0.8  | 1.1  | 1.2  | 0.6  | 0.8  | 0.9  | 0.8  | 0.9  | 0.7  | 1.9  | 1.0  | 0.8  |
| Slc2a4      | 0.0  | 0.0  | 0.0  | 0.0  | 0.0  | 0.0  | 0.0  | 0.0  | 0.0  | 0.0  | 0.0  | 0.0  |
| Slc2a4rg-ps | 0.7  | 0.8  | 0.4  | 0.5  | 0.6  | 0.5  | 0.6  | 0.5  | 0.6  | 0.3  | 0.7  | 0.3  |
| Slc2a5      | 0.1  | 0.0  | 0.0  | 0.1  | 0.0  | 0.1  | 0.0  | 0.1  | 0.0  | 0.0  | 0.1  | 0.0  |
| Slc2a6      | 7.0  | 5.8  | 6.5  | 12.6 | 16.2 | 7.1  | 9.1  | 8.7  | 4.8  | 2.8  | 4.8  | 3.5  |
| Slc2a8      | 5.8  | 5.2  | 5.4  | 3.5  | 4.7  | 4.7  | 5.4  | 5.6  | 5.9  | 5.7  | 4.0  | 4.4  |
| Slc2a9      | 1.4  | 1.2  | 1.2  | 2.1  | 2.2  | 1.5  | 1.5  | 0.8  | 1.0  | 1.1  | 1.0  | 1.0  |
| Slc30a1     | 4.4  | 4.0  | 4.7  | 4.6  | 4.9  | 3.8  | 4.5  | 4.1  | 4.5  | 6.0  | 4.9  | 4.9  |
| Slc30a4     | 14.2 | 12.9 | 11.4 | 12.2 | 11.4 | 13.4 | 10.8 | 11.7 | 11.9 | 12.0 | 13.1 | 12.2 |
| Slc30a5     | 20.1 | 18.9 | 18.6 | 18.7 | 20.4 | 18.5 | 19.2 | 20.0 | 20.4 | 21.4 | 21.4 | 21.6 |
| Slc30a6     | 7.3  | 7.9  | 7.0  | 7.4  | 7.1  | 7.1  | 7.6  | 7.5  | 8.5  | 7.9  | 8.6  | 8.6  |
| Slc30a7     | 6.1  | 6.8  | 6.8  | 5.7  | 6.6  | 5.5  | 7.1  | 7.6  | 7.0  | 7.1  | 7.5  | 7.2  |
| Slc30a9     | 30.7 | 28.8 | 23.2 | 29.2 | 24.8 | 26.9 | 25.6 | 20.7 | 24.7 | 26.7 | 28.0 | 27.6 |
| Slc31a1     | 9.0  | 12.3 | 12.2 | 9.3  | 10.8 | 7.6  | 10.0 | 13.3 | 10.5 | 10.3 | 10.4 | 10.7 |
| Slc31a2     | 13.3 | 9.9  | 8.3  | 14.8 | 13.4 | 11.6 | 8.5  | 9.7  | 10.0 | 13.6 | 10.6 | 10.3 |
| Slc33a1     | 20.7 | 18.0 | 15.5 | 17.4 | 19.2 | 18.3 | 15.1 | 13.7 | 19.1 | 20.7 | 18.5 | 18.5 |
| Slc35a1     | 28.9 | 26.2 | 20.1 | 25.7 | 22.4 | 26.7 | 18.4 | 17.6 | 22.5 | 22.9 | 22.1 | 19.3 |
| Slc35a2     | 21.5 | 19.3 | 17.5 | 20.9 | 21.3 | 20.4 | 20.5 | 24.3 | 22.8 | 20.3 | 20.2 | 20.1 |
| Slc35a3     | 6.7  | 7.6  | 7.3  | 6.6  | 7.2  | 6.9  | 6.2  | 6.4  | 7.2  | 6.6  | 7.6  | 8.1  |
| Slc35a4     | 10.5 | 10.2 | 8.8  | 11.3 | 11.9 | 11.5 | 10.7 | 11.2 | 10.5 | 10.5 | 8.6  | 7.8  |
| Slc35a5     | 10.6 | 10.5 | 9.9  | 12.9 | 9.9  | 11.7 | 9.9  | 9.1  | 9.8  | 10.7 | 11.2 | 11.8 |
| Slc35b1     | 60.5 | 50.7 | 44.4 | 63.2 | 46.4 | 55.3 | 51.3 | 51.3 | 51.1 | 48.0 | 51.4 | 50.2 |
| Slc35b2     | 16.2 | 17.3 | 14.7 | 15.0 | 15.7 | 18.2 | 19.8 | 19.0 | 18.7 | 20.1 | 16.2 | 17.8 |
| Slc35b3     | 7.0  | 5.9  | 5.6  | 6.2  | 7.0  | 6.5  | 6.5  | 5.2  | 7.5  | 6.6  | 6.8  | 6.3  |
| Slc35b4     | 6.4  | 6.0  | 6.8  | 6.6  | 7.2  | 6.0  | 7.4  | 9.6  | 8.6  | 8.5  | 7.2  | 6.8  |
| Slc35c1     | 1.2  | 1.4  | 0.9  | 1.5  | 1.9  | 1.2  | 1.3  | 1.6  | 1.1  | 1.3  | 1.3  | 1.0  |
| Slc35c2     | 14.3 | 11.4 | 7.1  | 19.0 | 14.0 | 14.1 | 11.7 | 9.3  | 9.6  | 10.6 | 9.9  | 9.7  |
| Slc35d1     | 0.9  | 0.8  | 1.0  | 1.0  | 0.8  | 0.8  | 1.0  | 0.7  | 0.6  | 1.3  | 1.0  | 1.0  |
| Slc35d2     | 2.5  | 3.0  | 2.4  | 2.5  | 2.6  | 2.4  | 2.5  | 2.2  | 2.7  | 2.0  | 2.8  | 2.6  |
| Slc35d3     | 0.0  | 0.0  | 0.0  | 0.0  | 0.0  | 0.0  | 0.0  | 0.0  | 0.0  | 0.0  | 0.0  | 0.0  |
| Slc35e1     | 12.2 | 11.4 | 11.0 | 11.8 | 11.6 | 11.9 | 11.9 | 10.2 | 9.8  | 9.2  | 10.6 | 9.8  |
| Slc35e2     | 2.5  | 2.3  | 2.7  | 3.0  | 2.5  | 3.2  | 2.8  | 2.5  | 2.4  | 2.8  | 2.5  | 2.6  |
| Slc35e3     | 9.1  | 8.1  | 8.1  | 9.3  | 7.6  | 9.0  | 7.5  | 7.0  | 6.8  | 7.6  | 7.0  | 7.3  |
| Slc35e4     | 7.6  | 4.5  | 3.4  | 9.3  | 6.7  | 8.1  | 5.3  | 5.3  | 5.2  | 6.5  | 5.9  | 4.2  |
| Slc35f1     | 0.2  | 0.1  | 0.2  | 0.3  | 0.5  | 0.4  | 0.3  | 0.1  | 0.2  | 0.1  | 0.1  | 0.1  |
| Slc35f2     | 0.0  | 0.0  | 0.0  | 0.1  | 0.0  | 0.0  | 0.0  | 0.0  | 0.0  | 0.0  | 0.0  | 0.0  |
| Slc35f3     | 0.0  | 0.0  | 0.0  | 0.0  | 0.0  | 0.0  | 0.0  | 0.0  | 0.0  | 0.0  | 0.0  | 0.0  |
| Slc35f5     | 19.1 | 18.9 | 16.4 | 18.7 | 18.3 | 19.3 | 17.6 | 18.1 | 21.2 | 18.5 | 19.0 | 18.7 |
| Slc35f6     | 11.4 | 11.0 | 8.9  | 13.6 | 12.5 | 14.2 | 11.5 | 10.9 | 11.2 | 11.0 | 10.7 | 11.0 |
| Slc35g1     | 0.8  | 0.7  | 0.9  | 0.8  | 0.8  | 0.7  | 0.6  | 0.5  | 0.4  | 0.6  | 0.5  | 0.5  |
| Slc35g2     | 0.4  | 0.7  | 0.5  | 0.4  | 0.5  | 0.5  | 0.5  | 0.7  | 0.8  | 0.4  | 0.3  | 0.5  |

Online Table 1

|          |       |       |       |       |      |       |       |       |       |       |       |       |
|----------|-------|-------|-------|-------|------|-------|-------|-------|-------|-------|-------|-------|
| Slc35g3  | 0.1   | 0.0   | 0.1   | 0.1   | 0.1  | 0.0   | 0.1   | 0.0   | 0.1   | 0.1   | 0.2   | 0.0   |
| Slc36a1  | 2.2   | 2.7   | 2.3   | 2.8   | 3.4  | 3.0   | 2.6   | 2.4   | 2.7   | 2.2   | 2.3   | 1.8   |
| Slc36a2  | 0.1   | 0.1   | 0.1   | 0.0   | 0.1  | 0.0   | 0.1   | 0.1   | 0.1   | 0.1   | 0.0   | 0.0   |
| Slc36a4  | 7.8   | 7.8   | 10.3  | 8.4   | 8.5  | 6.3   | 9.6   | 8.4   | 8.9   | 7.9   | 9.9   | 8.7   |
| Slc37a1  | 0.0   | 0.0   | 0.0   | 0.2   | 0.2  | 0.0   | 0.1   | 0.0   | 0.0   | 0.0   | 0.0   | 0.0   |
| Slc37a2  | 1.2   | 1.1   | 1.7   | 3.3   | 7.1  | 0.8   | 1.2   | 1.0   | 1.1   | 1.0   | 1.0   | 0.9   |
| Slc37a3  | 7.2   | 6.9   | 7.2   | 7.8   | 7.4  | 7.2   | 6.5   | 7.4   | 6.2   | 6.6   | 6.7   | 6.8   |
| Slc37a4  | 4.5   | 4.2   | 3.7   | 5.3   | 4.0  | 5.8   | 4.0   | 4.3   | 4.6   | 3.7   | 4.4   | 3.9   |
| Slc38a1  | 3.5   | 1.7   | 1.3   | 3.5   | 2.6  | 3.7   | 2.1   | 1.5   | 1.8   | 4.6   | 3.5   | 2.4   |
| Slc38a10 | 57.3  | 46.3  | 45.2  | 69.1  | 57.6 | 67.1  | 62.8  | 49.6  | 50.9  | 55.8  | 52.8  | 59.6  |
| Slc38a11 | 0.0   | 0.0   | 0.0   | 0.0   | 0.0  | 0.0   | 0.0   | 0.0   | 0.0   | 0.0   | 0.0   | 0.0   |
| Slc38a2  | 27.0  | 27.4  | 29.9  | 25.8  | 31.2 | 24.6  | 33.2  | 37.0  | 39.5  | 49.7  | 42.7  | 38.9  |
| Slc38a4  | 0.0   | 0.0   | 0.0   | 0.0   | 0.0  | 0.1   | 0.0   | 0.0   | 0.0   | 0.0   | 0.0   | 0.0   |
| Slc38a5  | 0.0   | 0.0   | 0.0   | 0.0   | 0.0  | 0.0   | 0.0   | 0.0   | 0.0   | 0.0   | 0.0   | 0.0   |
| Slc38a6  | 1.8   | 1.9   | 1.8   | 2.1   | 2.0  | 1.9   | 1.4   | 1.6   | 1.4   | 1.3   | 1.0   | 1.4   |
| Slc38a7  | 5.7   | 4.8   | 3.5   | 7.4   | 4.7  | 6.8   | 5.1   | 5.5   | 4.7   | 4.4   | 5.0   | 4.7   |
| Slc38a8  | 0.0   | 0.0   | 0.0   | 0.0   | 0.1  | 0.0   | 0.0   | 0.0   | 0.0   | 0.0   | 0.0   | 0.0   |
| Slc38a9  | 1.2   | 1.3   | 1.3   | 1.3   | 1.2  | 1.2   | 1.0   | 1.0   | 1.1   | 1.1   | 1.0   | 1.0   |
| Slc39a1  | 73.6  | 70.9  | 80.6  | 84.4  | 82.7 | 66.5  | 96.9  | 104.5 | 94.0  | 89.3  | 92.2  | 97.3  |
| Slc39a10 | 4.9   | 3.8   | 3.8   | 4.8   | 5.6  | 3.5   | 4.9   | 4.9   | 5.4   | 14.0  | 7.7   | 7.3   |
| Slc39a11 | 11.8  | 10.5  | 9.4   | 11.8  | 12.4 | 13.6  | 9.5   | 9.0   | 8.5   | 11.2  | 9.9   | 8.6   |
| Slc39a13 | 34.8  | 32.2  | 27.0  | 44.2  | 36.3 | 35.0  | 46.1  | 32.9  | 38.8  | 30.6  | 36.5  | 32.2  |
| Slc39a14 | 15.3  | 19.5  | 26.2  | 11.9  | 28.5 | 11.9  | 30.5  | 36.6  | 29.8  | 20.6  | 20.5  | 24.3  |
| Slc39a2  | 0.1   | 0.1   | 0.1   | 0.2   | 0.1  | 0.1   | 0.0   | 0.0   | 0.0   | 0.1   | 0.1   | 0.1   |
| Slc39a3  | 4.8   | 5.0   | 4.1   | 4.6   | 5.1  | 5.1   | 5.1   | 6.1   | 6.5   | 5.7   | 5.2   | 5.4   |
| Slc39a4  | 1.2   | 0.2   | 0.3   | 2.4   | 4.3  | 1.5   | 0.5   | 0.0   | 0.0   | 0.3   | 0.1   | 0.1   |
| Slc39a5  | 0.0   | 0.0   | 0.0   | 0.0   | 0.0  | 0.0   | 0.0   | 0.0   | 0.0   | 0.0   | 0.0   | 0.0   |
| Slc39a6  | 28.2  | 25.8  | 21.3  | 28.4  | 28.5 | 26.0  | 31.0  | 22.4  | 25.3  | 25.0  | 26.8  | 27.3  |
| Slc39a7  | 105.4 | 84.4  | 77.3  | 117.7 | 83.2 | 103.6 | 97.8  | 90.0  | 87.5  | 84.6  | 92.3  | 92.1  |
| Slc39a8  | 4.6   | 3.6   | 2.0   | 3.4   | 2.8  | 4.0   | 3.4   | 2.4   | 2.2   | 5.8   | 5.8   | 4.0   |
| Slc39a9  | 4.0   | 4.7   | 4.9   | 5.1   | 5.8  | 4.7   | 5.2   | 6.0   | 5.2   | 5.1   | 4.9   | 5.1   |
| Slc3a1   | 0.1   | 0.1   | 0.0   | 0.3   | 0.2  | 0.1   | 0.1   | 0.1   | 0.1   | 0.1   | 0.1   | 0.2   |
| Slc3a2   | 30.3  | 22.5  | 23.2  | 36.8  | 30.0 | 32.4  | 27.2  | 38.3  | 28.5  | 24.4  | 28.0  | 22.5  |
| Slc40a1  | 0.9   | 0.3   | 0.1   | 6.2   | 8.5  | 0.3   | 0.2   | 0.3   | 0.3   | 0.5   | 0.3   | 0.4   |
| Slc41a1  | 8.8   | 10.3  | 12.7  | 8.6   | 9.1  | 9.7   | 10.4  | 12.3  | 9.8   | 8.0   | 8.3   | 9.4   |
| Slc41a2  | 7.5   | 6.3   | 6.2   | 9.0   | 9.9  | 6.8   | 9.3   | 8.7   | 7.3   | 6.9   | 8.6   | 8.3   |
| Slc41a3  | 3.3   | 2.9   | 3.1   | 4.1   | 3.9  | 4.4   | 3.6   | 3.5   | 4.9   | 3.7   | 3.4   | 3.9   |
| Slc43a1  | 0.1   | 0.2   | 0.6   | 0.1   | 0.2  | 0.2   | 0.4   | 0.7   | 0.8   | 1.0   | 1.0   | 0.5   |
| Slc43a2  | 1.3   | 1.2   | 1.4   | 2.7   | 4.2  | 1.0   | 1.1   | 1.1   | 0.7   | 0.9   | 0.8   | 1.1   |
| Slc43a3  | 14.8  | 24.8  | 40.7  | 9.5   | 21.2 | 11.7  | 24.4  | 27.4  | 36.0  | 21.2  | 23.3  | 44.2  |
| Slc44a1  | 16.4  | 19.1  | 21.8  | 13.0  | 14.6 | 14.1  | 11.6  | 20.5  | 16.1  | 13.6  | 14.8  | 15.6  |
| Slc44a2  | 89.4  | 123.0 | 135.1 | 80.7  | 97.2 | 99.6  | 134.8 | 204.5 | 162.3 | 99.0  | 120.7 | 116.6 |
| Slc44a3  | 0.2   | 0.5   | 0.9   | 0.1   | 0.3  | 0.3   | 0.3   | 0.6   | 0.4   | 0.7   | 0.6   | 0.7   |
| Slc44a4  | 0.1   | 0.0   | 0.0   | 0.0   | 0.0  | 0.1   | 0.0   | 0.0   | 0.0   | 0.0   | 0.0   | 0.0   |
| Slc44a5  | 0.0   | 0.0   | 0.0   | 0.0   | 0.0  | 0.0   | 0.1   | 0.0   | 0.0   | 0.0   | 0.0   | 0.0   |
| Slc45a1  | 0.0   | 0.0   | 0.0   | 0.0   | 0.0  | 0.1   | 0.0   | 0.0   | 0.0   | 0.0   | 0.0   | 0.0   |
| Slc45a2  | 0.0   | 0.0   | 0.0   | 0.0   | 0.0  | 0.0   | 0.0   | 0.0   | 0.0   | 0.0   | 0.0   | 0.0   |
| Slc45a3  | 3.1   | 5.0   | 5.8   | 2.3   | 4.2  | 2.5   | 7.5   | 8.3   | 10.4  | 4.9   | 5.4   | 8.3   |
| Slc45a4  | 2.9   | 3.1   | 3.2   | 2.9   | 3.8  | 2.7   | 2.8   | 3.4   | 3.1   | 2.6   | 3.4   | 2.1   |
| Slc46a1  | 2.2   | 1.8   | 1.4   | 3.2   | 2.0  | 2.6   | 2.0   | 1.9   | 2.1   | 2.3   | 1.7   | 1.5   |
| Slc46a2  | 0.0   | 0.0   | 0.1   | 0.0   | 0.0  | 0.0   | 0.0   | 0.0   | 0.0   | 0.0   | 0.0   | 0.0   |
| Slc46a3  | 1.3   | 1.6   | 1.4   | 1.4   | 0.9  | 1.3   | 0.9   | 1.0   | 0.9   | 0.9   | 0.8   | 1.0   |
| Slc47a1  | 0.1   | 0.0   | 0.0   | 0.0   | 0.0  | 0.0   | 0.0   | 0.1   | 0.0   | 0.0   | 0.0   | 0.0   |
| Slc48a1  | 86.3  | 82.7  | 67.8  | 103.1 | 84.1 | 113.7 | 67.6  | 78.1  | 60.3  | 109.9 | 91.1  | 83.0  |
| Slc4a10  | 0.0   | 0.0   | 0.0   | 0.0   | 0.0  | 0.0   | 0.0   | 0.0   | 0.0   | 0.0   | 0.0   | 0.0   |
| Slc4a11  | 0.5   | 0.6   | 0.5   | 0.6   | 0.4  | 0.8   | 0.5   | 0.5   | 0.4   | 0.3   | 0.3   | 0.4   |
| Slc4a1ap | 11.8  | 12.8  | 13.5  | 13.8  | 11.0 | 13.1  | 12.3  | 11.8  | 10.2  | 10.7  | 12.0  | 15.0  |

Online Table 1

|          |      |      |      |      |      |      |      |      |      |      |      |      |
|----------|------|------|------|------|------|------|------|------|------|------|------|------|
| Slc4a2   | 30.2 | 25.1 | 17.5 | 30.3 | 25.1 | 27.2 | 27.4 | 24.2 | 28.3 | 29.0 | 27.6 | 24.1 |
| Slc4a3   | 3.0  | 3.1  | 2.8  | 2.6  | 2.3  | 3.1  | 3.1  | 3.2  | 3.5  | 2.6  | 2.1  | 2.3  |
| Slc4a4   | 3.6  | 3.6  | 4.8  | 0.7  | 1.4  | 1.0  | 3.1  | 6.5  | 3.0  | 4.6  | 3.8  | 3.9  |
| Slc4a5   | 0.0  | 0.0  | 0.0  | 0.0  | 0.0  | 0.0  | 0.1  | 0.0  | 0.0  | 0.1  | 0.0  | 0.0  |
| Slc4a7   | 3.5  | 3.5  | 3.2  | 3.8  | 4.7  | 3.2  | 3.2  | 2.5  | 3.1  | 3.8  | 4.2  | 3.1  |
| Slc4a8   | 0.0  | 0.0  | 0.0  | 0.0  | 0.0  | 0.0  | 0.0  | 0.0  | 0.0  | 0.0  | 0.0  | 0.0  |
| Slc4a9   | 0.0  | 0.0  | 0.0  | 0.0  | 0.0  | 0.0  | 0.0  | 0.0  | 0.0  | 0.0  | 0.0  | 0.0  |
| Slc50a1  | 25.3 | 26.5 | 29.2 | 27.9 | 22.5 | 29.2 | 30.1 | 38.1 | 31.6 | 28.6 | 28.0 | 29.2 |
| Slc51a   | 0.0  | 0.0  | 0.0  | 0.0  | 0.0  | 0.0  | 0.0  | 0.0  | 0.0  | 0.1  | 0.0  | 0.0  |
| Slc51b   | 0.0  | 0.0  | 0.0  | 0.0  | 0.1  | 0.0  | 0.0  | 0.0  | 0.1  | 0.2  | 0.2  | 0.0  |
| Slc52a2  | 2.6  | 2.3  | 2.6  | 3.0  | 2.7  | 3.0  | 2.1  | 2.3  | 2.5  | 2.2  | 1.9  | 2.2  |
| Slc52a3  | 0.1  | 0.0  | 0.0  | 0.1  | 0.1  | 0.0  | 0.1  | 0.0  | 0.0  | 0.0  | 0.0  | 0.0  |
| Slc5a1   | 0.1  | 0.0  | 0.0  | 0.0  | 0.0  | 0.0  | 0.0  | 0.0  | 0.0  | 0.0  | 0.0  | 0.0  |
| Slc5a11  | 0.0  | 0.1  | 0.0  | 0.1  | 0.1  | 0.0  | 0.1  | 0.0  | 0.1  | 0.0  | 0.1  | 0.0  |
| Slc5a12  | 0.0  | 0.0  | 0.0  | 0.0  | 0.1  | 0.0  | 0.0  | 0.0  | 0.0  | 0.0  | 0.0  | 0.0  |
| Slc5a2   | 0.0  | 0.0  | 0.0  | 0.0  | 0.0  | 0.0  | 0.0  | 0.0  | 0.0  | 0.0  | 0.0  | 0.0  |
| Slc5a3   | 4.4  | 9.6  | 11.1 | 5.0  | 5.2  | 8.3  | 4.6  | 8.8  | 4.8  | 6.1  | 4.8  | 4.4  |
| Slc5a4b  | 0.1  | 0.0  | 0.0  | 0.0  | 0.0  | 0.0  | 0.0  | 0.0  | 0.0  | 0.0  | 0.0  | 0.0  |
| Slc5a5   | 0.0  | 0.0  | 0.0  | 0.0  | 0.0  | 0.0  | 0.0  | 0.0  | 0.0  | 0.0  | 0.0  | 0.0  |
| Slc5a6   | 0.8  | 0.7  | 0.9  | 1.2  | 0.9  | 1.2  | 1.0  | 0.9  | 0.8  | 0.8  | 0.7  | 0.7  |
| Slc5a7   | 0.0  | 0.0  | 0.0  | 0.0  | 0.0  | 0.0  | 0.0  | 0.0  | 0.0  | 0.0  | 0.0  | 0.0  |
| Slc5a8   | 0.2  | 0.2  | 0.1  | 0.2  | 0.3  | 0.1  | 0.1  | 0.0  | 0.1  | 0.2  | 0.2  | 0.2  |
| Slc6a1   | 0.0  | 0.0  | 0.0  | 0.0  | 0.0  | 0.0  | 0.0  | 0.0  | 0.0  | 0.0  | 0.0  | 0.0  |
| Slc6a12  | 0.2  | 0.0  | 0.0  | 0.1  | 0.1  | 0.1  | 0.1  | 0.0  | 0.1  | 0.0  | 0.1  | 0.0  |
| Slc6a17  | 0.1  | 0.1  | 0.1  | 0.2  | 0.1  | 0.2  | 0.1  | 0.0  | 0.1  | 0.4  | 0.3  | 0.3  |
| Slc6a18  | 0.0  | 0.0  | 0.0  | 0.0  | 0.0  | 0.0  | 0.0  | 0.0  | 0.0  | 0.0  | 0.0  | 0.0  |
| Slc6a19  | 0.0  | 0.0  | 0.0  | 0.0  | 0.0  | 0.0  | 0.0  | 0.0  | 0.0  | 0.0  | 0.0  | 0.0  |
| Slc6a2   | 0.0  | 0.0  | 0.0  | 0.0  | 0.0  | 0.0  | 0.0  | 0.0  | 0.0  | 0.0  | 0.0  | 0.0  |
| Slc6a20a | 0.0  | 0.0  | 0.0  | 0.0  | 0.0  | 0.0  | 0.0  | 0.0  | 0.0  | 0.0  | 0.0  | 0.0  |
| Slc6a20b | 0.0  | 0.0  | 0.0  | 0.0  | 0.0  | 0.0  | 0.0  | 0.1  | 0.1  | 0.1  | 0.1  | 0.0  |
| Slc6a4   | 0.0  | 0.0  | 0.0  | 0.2  | 0.0  | 0.0  | 0.0  | 0.0  | 0.0  | 0.0  | 0.0  | 0.0  |
| Slc6a6   | 27.5 | 29.6 | 24.8 | 54.8 | 46.9 | 35.7 | 38.4 | 24.6 | 25.0 | 27.8 | 35.5 | 25.5 |
| Slc6a7   | 0.4  | 0.3  | 0.2  | 0.2  | 0.3  | 0.2  | 0.3  | 0.3  | 0.3  | 0.1  | 0.1  | 0.2  |
| Slc6a8   | 19.4 | 18.5 | 16.8 | 22.2 | 21.2 | 23.6 | 20.0 | 16.1 | 19.0 | 19.2 | 17.5 | 19.3 |
| Slc6a9   | 5.0  | 4.1  | 3.7  | 6.2  | 3.8  | 6.6  | 4.6  | 8.5  | 5.7  | 3.5  | 4.2  | 2.8  |
| Slc7a1   | 8.6  | 7.1  | 5.8  | 9.8  | 8.1  | 9.3  | 9.1  | 9.1  | 8.8  | 5.8  | 8.0  | 5.3  |
| Slc7a10  | 0.0  | 0.0  | 0.1  | 0.3  | 0.0  | 0.1  | 0.0  | 0.1  | 0.1  | 0.1  | 0.0  | 0.1  |
| Slc7a11  | 5.1  | 2.8  | 3.1  | 10.4 | 11.7 | 5.7  | 2.5  | 4.4  | 1.9  | 1.5  | 2.4  | 1.3  |
| Slc7a13  | 0.5  | 0.3  | 0.3  | 0.5  | 0.5  | 0.4  | 0.3  | 0.2  | 0.2  | 0.2  | 0.5  | 0.3  |
| Slc7a14  | 0.1  | 0.2  | 0.2  | 0.2  | 0.2  | 0.1  | 0.1  | 0.2  | 0.2  | 0.2  | 0.2  | 0.2  |
| Slc7a2   | 6.0  | 5.4  | 10.4 | 3.0  | 5.7  | 5.2  | 5.2  | 10.0 | 7.0  | 8.0  | 5.0  | 9.4  |
| Slc7a3   | 0.5  | 0.3  | 0.2  | 0.3  | 0.1  | 0.3  | 0.3  | 0.4  | 0.3  | 0.4  | 0.5  | 0.3  |
| Slc7a4   | 0.3  | 0.2  | 0.3  | 0.4  | 0.3  | 0.5  | 0.2  | 0.1  | 0.2  | 0.3  | 0.2  | 0.2  |
| Slc7a5   | 9.8  | 5.4  | 4.5  | 8.4  | 4.5  | 7.6  | 7.5  | 14.6 | 10.9 | 5.6  | 9.3  | 4.4  |
| Slc7a6   | 12.7 | 15.6 | 15.5 | 11.9 | 15.1 | 9.7  | 17.1 | 19.0 | 18.4 | 14.8 | 15.8 | 15.2 |
| Slc7a6os | 10.8 | 11.2 | 12.6 | 11.2 | 9.9  | 9.5  | 12.1 | 12.5 | 12.7 | 12.7 | 11.7 | 13.5 |
| Slc7a7   | 3.1  | 2.5  | 2.4  | 3.1  | 4.9  | 3.8  | 3.8  | 3.1  | 3.7  | 2.7  | 4.0  | 3.2  |
| Slc7a8   | 0.4  | 0.1  | 0.1  | 0.6  | 1.6  | 0.1  | 0.4  | 0.2  | 0.3  | 0.1  | 0.2  | 0.2  |
| Slc8a1   | 3.0  | 5.9  | 8.7  | 3.6  | 6.1  | 2.9  | 8.2  | 10.4 | 9.8  | 5.9  | 6.6  | 8.4  |
| Slc8a2   | 0.0  | 0.0  | 0.0  | 0.0  | 0.0  | 0.0  | 0.0  | 0.0  | 0.0  | 0.1  | 0.0  | 0.0  |
| Slc8a3   | 0.2  | 0.2  | 0.2  | 0.2  | 0.1  | 0.2  | 0.2  | 0.1  | 0.1  | 0.1  | 0.1  | 0.1  |
| Slc9a1   | 2.5  | 3.2  | 4.2  | 3.3  | 3.8  | 3.2  | 4.5  | 4.1  | 3.9  | 2.9  | 2.6  | 2.6  |
| Slc9a2   | 0.0  | 0.0  | 0.0  | 0.1  | 0.0  | 0.1  | 0.0  | 0.0  | 0.0  | 0.0  | 0.0  | 0.0  |
| Slc9a3r1 | 9.6  | 7.6  | 7.7  | 5.2  | 6.7  | 3.3  | 2.9  | 8.1  | 7.8  | 92.0 | 37.7 | 20.4 |
| Slc9a3r2 | 22.9 | 28.9 | 28.2 | 19.7 | 22.2 | 20.9 | 29.4 | 27.4 | 31.1 | 28.7 | 27.9 | 26.0 |
| Slc9a4   | 0.0  | 0.0  | 0.0  | 0.1  | 0.0  | 0.0  | 0.0  | 0.1  | 0.0  | 0.0  | 0.0  | 0.0  |
| Slc9a5   | 0.5  | 0.8  | 0.8  | 0.5  | 0.8  | 0.7  | 0.8  | 0.5  | 0.6  | 0.6  | 0.5  | 0.4  |

Online Table 1

|            |       |      |      |      |      |      |      |      |      |      |      |      |
|------------|-------|------|------|------|------|------|------|------|------|------|------|------|
| Slc9a6     | 4.9   | 5.5  | 4.8  | 5.0  | 5.6  | 5.2  | 4.8  | 4.7  | 5.3  | 5.1  | 5.3  | 5.2  |
| Slc9a7     | 3.7   | 1.8  | 1.6  | 3.5  | 1.7  | 3.3  | 1.3  | 0.9  | 0.7  | 1.1  | 1.5  | 1.1  |
| Slc9a8     | 3.5   | 2.7  | 2.3  | 3.5  | 3.6  | 3.0  | 4.1  | 3.7  | 4.0  | 3.1  | 3.0  | 3.1  |
| Slc9a9     | 2.1   | 2.1  | 1.9  | 2.6  | 2.3  | 1.9  | 2.3  | 2.2  | 2.0  | 1.2  | 1.6  | 1.5  |
| Slc9b1     | 0.1   | 0.1  | 0.1  | 0.0  | 0.0  | 0.1  | 0.0  | 0.1  | 0.2  | 0.0  | 0.1  | 0.1  |
| Slc9b2     | 0.1   | 0.1  | 0.1  | 0.3  | 0.2  | 0.3  | 0.1  | 0.1  | 0.0  | 0.1  | 0.2  | 0.2  |
| Slco1a1    | 0.0   | 0.0  | 0.0  | 0.0  | 0.0  | 0.0  | 0.0  | 0.0  | 0.0  | 0.0  | 0.0  | 0.0  |
| Slco1a4    | 0.0   | 0.0  | 0.0  | 0.1  | 0.0  | 0.0  | 0.0  | 0.0  | 0.0  | 0.0  | 0.0  | 0.0  |
| Slco1a5    | 0.2   | 0.1  | 0.1  | 0.2  | 0.2  | 0.1  | 0.1  | 0.0  | 0.1  | 0.2  | 0.1  | 0.0  |
| Slco1c1    | 0.0   | 0.0  | 0.0  | 0.0  | 0.0  | 0.0  | 0.0  | 0.0  | 0.0  | 0.0  | 0.0  | 0.0  |
| Slco2a1    | 7.1   | 5.2  | 2.6  | 3.8  | 3.1  | 3.9  | 5.0  | 3.3  | 3.5  | 6.8  | 6.7  | 5.3  |
| Slco2b1    | 0.0   | 0.0  | 0.1  | 0.0  | 0.0  | 0.0  | 0.0  | 0.0  | 0.1  | 0.0  | 0.0  | 0.0  |
| Slco3a1    | 7.9   | 6.9  | 5.7  | 10.1 | 12.2 | 6.8  | 10.0 | 5.5  | 5.8  | 6.4  | 7.5  | 6.0  |
| Slco4a1    | 0.2   | 0.0  | 0.0  | 0.8  | 1.3  | 0.0  | 0.2  | 0.1  | 0.1  | 0.1  | 0.0  | 0.1  |
| Slco5a1    | 0.1   | 0.1  | 0.1  | 0.1  | 0.2  | 0.1  | 0.1  | 0.1  | 0.1  | 0.1  | 0.1  | 0.1  |
| Slfn10-ps  | 0.5   | 0.3  | 0.5  | 1.0  | 1.5  | 0.4  | 0.6  | 0.2  | 0.3  | 0.3  | 0.5  | 0.4  |
| Slfn14-ps  | 0.0   | 0.0  | 0.0  | 0.0  | 0.0  | 0.0  | 0.0  | 0.0  | 0.0  | 0.1  | 0.0  | 0.0  |
| Slfn2      | 3.5   | 0.9  | 1.1  | 9.9  | 11.7 | 2.2  | 4.1  | 1.0  | 1.3  | 2.7  | 1.2  | 3.7  |
| Slfn3      | 0.7   | 0.5  | 0.7  | 0.6  | 1.0  | 0.3  | 0.6  | 0.5  | 0.2  | 0.2  | 0.6  | 0.4  |
| Slfn4      | 0.0   | 0.0  | 0.1  | 0.2  | 0.1  | 0.0  | 0.1  | 0.0  | 0.0  | 0.0  | 0.0  | 0.0  |
| Slfn5      | 16.2  | 20.0 | 32.9 | 24.4 | 18.8 | 16.8 | 16.8 | 30.9 | 17.9 | 8.1  | 11.5 | 18.5 |
| Slfn8      | 3.3   | 2.2  | 4.0  | 4.0  | 2.9  | 2.6  | 2.2  | 1.5  | 1.3  | 0.9  | 1.6  | 3.6  |
| Slfn9      | 2.5   | 3.2  | 5.5  | 1.9  | 5.4  | 1.3  | 6.1  | 3.1  | 3.0  | 1.6  | 3.8  | 3.4  |
| Slfnl1     | 0.1   | 0.1  | 0.1  | 0.0  | 0.0  | 0.0  | 0.0  | 0.0  | 0.0  | 0.1  | 0.0  | 0.0  |
| Slirp      | 100.3 | 85.6 | 59.7 | 78.8 | 80.9 | 92.2 | 59.8 | 74.4 | 78.5 | 72.1 | 80.1 | 75.8 |
| Slit1      | 0.4   | 0.4  | 0.3  | 0.2  | 0.4  | 0.4  | 0.3  | 0.1  | 0.1  | 0.2  | 0.1  | 0.1  |
| Slit2      | 17.3  | 14.6 | 12.8 | 16.8 | 19.4 | 14.9 | 23.7 | 25.1 | 26.5 | 33.0 | 33.0 | 24.7 |
| Slit3      | 5.9   | 10.7 | 14.5 | 2.7  | 6.5  | 3.0  | 15.0 | 17.4 | 21.5 | 29.8 | 21.1 | 22.6 |
| Slitrk2    | 0.1   | 0.1  | 0.1  | 0.1  | 0.1  | 0.0  | 0.1  | 0.0  | 0.1  | 0.0  | 0.1  | 0.1  |
| Slitrk5    | 0.0   | 0.0  | 0.0  | 0.0  | 0.0  | 0.0  | 0.0  | 0.0  | 0.0  | 0.0  | 0.0  | 0.0  |
| Slitrk6    | 0.1   | 0.0  | 0.0  | 0.0  | 0.0  | 0.0  | 0.0  | 0.1  | 0.0  | 0.0  | 0.0  | 0.0  |
| Slk        | 14.2  | 15.3 | 15.6 | 16.1 | 14.0 | 13.0 | 13.6 | 14.1 | 12.3 | 12.9 | 16.2 | 15.3 |
| Slmap      | 11.2  | 12.3 | 12.0 | 14.8 | 13.1 | 12.7 | 13.1 | 10.3 | 10.9 | 11.6 | 13.7 | 13.7 |
| Slmo1      | 0.1   | 0.1  | 0.0  | 0.1  | 0.1  | 0.1  | 0.0  | 0.0  | 0.0  | 0.0  | 0.0  | 0.0  |
| Slmo2      | 33.3  | 30.1 | 31.9 | 40.4 | 30.7 | 33.5 | 38.3 | 32.2 | 28.9 | 32.7 | 40.4 | 34.8 |
| Slpi       | 0.4   | 0.3  | 0.3  | 0.5  | 0.3  | 0.1  | 0.6  | 0.7  | 0.5  | 2.5  | 1.3  | 0.9  |
| Sltm       | 15.2  | 13.0 | 13.9 | 17.4 | 12.8 | 12.5 | 17.1 | 12.4 | 11.2 | 12.3 | 16.8 | 15.9 |
| Slu7       | 27.0  | 19.8 | 21.5 | 31.5 | 20.6 | 29.0 | 21.2 | 18.1 | 14.7 | 18.3 | 23.1 | 22.7 |
| Slx1b      | 1.3   | 1.4  | 1.2  | 1.1  | 0.9  | 1.4  | 1.2  | 1.4  | 1.1  | 1.2  | 1.2  | 0.9  |
| Slx4       | 3.2   | 4.1  | 4.4  | 3.4  | 3.7  | 3.0  | 4.5  | 4.1  | 3.7  | 3.1  | 3.8  | 3.4  |
| Slx4ip     | 2.5   | 3.3  | 3.0  | 2.9  | 3.0  | 3.0  | 3.2  | 3.0  | 2.9  | 2.5  | 2.9  | 2.5  |
| Smad1      | 8.4   | 9.9  | 12.8 | 8.2  | 9.5  | 8.1  | 10.7 | 12.0 | 10.5 | 9.1  | 9.9  | 10.8 |
| Smad2      | 8.0   | 8.6  | 8.0  | 7.5  | 7.7  | 7.6  | 8.3  | 7.9  | 8.3  | 6.9  | 8.1  | 7.7  |
| Smad3      | 16.0  | 14.2 | 11.7 | 16.9 | 13.6 | 16.3 | 17.3 | 10.6 | 13.9 | 17.5 | 16.8 | 16.4 |
| Smad4      | 20.1  | 21.7 | 22.2 | 20.8 | 20.3 | 23.6 | 20.6 | 20.5 | 21.6 | 20.2 | 23.9 | 21.6 |
| Smad5      | 8.0   | 8.9  | 8.5  | 6.9  | 7.9  | 7.0  | 8.1  | 8.9  | 8.3  | 7.9  | 8.2  | 8.2  |
| Smad6      | 35.7  | 47.1 | 53.3 | 27.5 | 31.1 | 26.1 | 43.3 | 38.7 | 48.6 | 33.1 | 34.9 | 45.1 |
| Smad7      | 14.6  | 16.4 | 16.8 | 8.7  | 13.0 | 11.0 | 15.7 | 12.3 | 16.1 | 14.7 | 11.7 | 15.3 |
| Smad9      | 1.4   | 1.7  | 2.1  | 1.1  | 1.0  | 1.8  | 1.2  | 1.0  | 1.1  | 1.4  | 1.3  | 1.3  |
| Smagp      | 0.4   | 0.1  | 0.0  | 1.4  | 1.8  | 0.2  | 0.3  | 0.1  | 0.3  | 0.4  | 0.0  | 0.2  |
| Smap1      | 28.0  | 25.9 | 23.6 | 28.6 | 22.8 | 27.5 | 23.9 | 24.1 | 21.2 | 23.7 | 28.9 | 26.0 |
| Smap2      | 4.3   | 4.7  | 5.2  | 6.3  | 6.0  | 5.3  | 4.8  | 4.6  | 5.1  | 5.6  | 5.5  | 5.1  |
| Smarca1    | 0.6   | 1.2  | 2.5  | 0.4  | 0.7  | 1.0  | 1.0  | 1.7  | 1.1  | 1.0  | 1.3  | 1.4  |
| Smarca2    | 25.6  | 24.3 | 32.0 | 26.1 | 18.8 | 24.2 | 21.5 | 24.6 | 16.6 | 21.5 | 23.0 | 26.8 |
| Smarca4    | 17.4  | 17.7 | 18.9 | 19.3 | 18.7 | 17.2 | 21.2 | 20.2 | 18.2 | 18.5 | 20.2 | 18.0 |
| Smarca5    | 19.2  | 20.3 | 23.2 | 18.9 | 19.4 | 18.1 | 21.1 | 21.8 | 18.8 | 21.1 | 24.5 | 24.4 |
| Smarca5-ps | 0.6   | 0.4  | 0.4  | 0.7  | 0.6  | 0.5  | 0.5  | 0.5  | 0.3  | 0.5  | 0.4  | 0.7  |

Online Table 1

|          |      |      |      |      |      |      |      |      |      |      |      |      |
|----------|------|------|------|------|------|------|------|------|------|------|------|------|
| Smarcad1 | 7.4  | 8.2  | 8.1  | 6.5  | 7.7  | 7.1  | 7.3  | 8.0  | 7.5  | 8.8  | 8.9  | 9.1  |
| Smarcal1 | 3.4  | 3.4  | 3.0  | 3.4  | 2.8  | 3.9  | 2.7  | 3.2  | 2.6  | 2.7  | 2.7  | 2.9  |
| Smarcb1  | 19.5 | 22.4 | 21.9 | 17.3 | 19.5 | 16.8 | 21.2 | 26.0 | 23.7 | 21.7 | 20.4 | 21.9 |
| Smarcc1  | 10.8 | 11.2 | 12.8 | 11.4 | 10.6 | 10.7 | 12.2 | 11.8 | 10.7 | 12.0 | 12.8 | 12.2 |
| Smarcc2  | 31.5 | 32.1 | 38.0 | 39.5 | 28.5 | 36.4 | 36.6 | 35.8 | 29.8 | 28.2 | 34.5 | 35.8 |
| Smarcd1  | 1.7  | 2.2  | 2.4  | 1.9  | 2.1  | 1.6  | 2.2  | 2.8  | 2.3  | 1.9  | 2.1  | 1.8  |
| Smarcd2  | 16.5 | 21.4 | 23.7 | 16.2 | 19.3 | 15.8 | 20.2 | 26.5 | 22.0 | 17.1 | 18.4 | 19.1 |
| Smarcd3  | 10.2 | 12.6 | 12.4 | 13.8 | 9.9  | 11.7 | 14.5 | 13.6 | 16.0 | 9.8  | 12.6 | 14.0 |
| Smarce1  | 28.6 | 28.5 | 33.8 | 35.3 | 25.2 | 25.1 | 29.2 | 34.7 | 26.9 | 31.2 | 36.4 | 34.5 |
| Smc1a    | 27.7 | 27.7 | 34.8 | 29.8 | 25.8 | 24.7 | 31.7 | 28.6 | 22.7 | 24.2 | 30.7 | 32.2 |
| Smc1b    | 0.0  | 0.0  | 0.0  | 0.1  | 0.0  | 0.0  | 0.1  | 0.0  | 0.1  | 0.0  | 0.1  | 0.1  |
| Smc2     | 4.8  | 8.0  | 12.7 | 3.3  | 10.1 | 3.1  | 10.4 | 5.8  | 8.3  | 5.3  | 8.9  | 7.4  |
| Smc3     | 14.3 | 17.1 | 20.5 | 12.9 | 14.2 | 12.7 | 17.9 | 17.4 | 15.0 | 15.0 | 19.1 | 17.9 |
| Smc4     | 17.2 | 26.2 | 34.0 | 19.2 | 22.8 | 19.9 | 27.9 | 26.2 | 32.3 | 25.6 | 31.8 | 32.9 |
| Smc5     | 10.6 | 13.7 | 15.2 | 9.7  | 12.4 | 11.2 | 14.3 | 13.5 | 16.3 | 11.7 | 14.5 | 16.3 |
| Smc6     | 18.0 | 20.9 | 21.7 | 17.6 | 15.4 | 16.9 | 20.1 | 19.0 | 20.3 | 17.6 | 24.1 | 22.8 |
| Smchd1   | 8.3  | 9.9  | 11.1 | 7.6  | 9.4  | 8.0  | 9.0  | 10.2 | 9.2  | 9.4  | 10.3 | 10.4 |
| Smcr7    | 4.6  | 3.7  | 3.4  | 4.0  | 3.6  | 4.7  | 3.9  | 4.2  | 4.8  | 3.9  | 3.4  | 3.4  |
| Smcr7l   | 6.1  | 6.1  | 5.2  | 7.1  | 6.4  | 6.0  | 5.8  | 5.6  | 6.7  | 6.0  | 5.9  | 5.7  |
| Smcr8    | 6.7  | 7.2  | 7.1  | 8.3  | 9.1  | 7.2  | 7.9  | 7.2  | 7.0  | 7.3  | 7.3  | 7.0  |
| Smek1    | 5.7  | 6.5  | 8.1  | 7.1  | 7.4  | 6.3  | 7.5  | 8.1  | 7.4  | 7.4  | 7.8  | 8.9  |
| Smek2    | 12.3 | 14.4 | 16.9 | 13.5 | 13.1 | 13.7 | 12.0 | 14.9 | 13.6 | 14.2 | 17.0 | 17.3 |
| Smg1     | 6.8  | 7.4  | 6.2  | 6.1  | 6.7  | 6.7  | 6.4  | 6.0  | 6.5  | 6.1  | 6.4  | 5.8  |
| Smg5     | 18.8 | 17.7 | 14.2 | 22.0 | 17.6 | 20.7 | 23.8 | 18.4 | 19.6 | 15.1 | 20.6 | 17.6 |
| Smg6     | 7.0  | 6.8  | 7.8  | 6.6  | 6.1  | 6.3  | 7.8  | 5.9  | 6.3  | 5.1  | 6.2  | 7.1  |
| Smg7     | 8.8  | 10.1 | 10.4 | 9.9  | 9.2  | 10.0 | 11.5 | 10.0 | 8.5  | 7.4  | 10.6 | 8.9  |
| Smg8     | 6.0  | 6.2  | 6.3  | 5.4  | 6.1  | 5.5  | 6.2  | 6.3  | 6.1  | 6.8  | 5.7  | 7.3  |
| Smg9     | 3.0  | 3.1  | 2.2  | 4.3  | 4.3  | 2.7  | 4.2  | 3.5  | 3.9  | 3.1  | 3.2  | 3.4  |
| Smim1    | 16.9 | 17.6 | 15.8 | 14.4 | 12.7 | 18.3 | 18.1 | 18.8 | 18.0 | 25.4 | 22.3 | 16.8 |
| Smim11   | 34.5 | 31.7 | 37.8 | 35.9 | 25.6 | 35.1 | 35.3 | 31.1 | 30.0 | 29.7 | 38.8 | 38.7 |
| Smim12   | 15.7 | 12.6 | 12.9 | 14.5 | 14.5 | 15.5 | 14.7 | 14.9 | 13.3 | 15.8 | 17.6 | 12.9 |
| Smim13   | 5.2  | 5.1  | 4.9  | 5.3  | 5.0  | 5.0  | 4.4  | 5.3  | 5.3  | 4.7  | 5.0  | 5.4  |
| Smim14   | 59.1 | 44.3 | 32.2 | 61.1 | 39.5 | 67.0 | 34.3 | 31.0 | 33.5 | 43.8 | 40.2 | 40.3 |
| Smim15   | 30.2 | 28.7 | 33.4 | 36.2 | 35.9 | 35.0 | 36.6 | 32.5 | 38.3 | 34.9 | 43.3 | 44.4 |
| Smim3    | 4.3  | 3.6  | 3.3  | 4.0  | 6.5  | 3.5  | 7.0  | 5.7  | 6.7  | 8.4  | 7.0  | 7.7  |
| Smim4    | 14.5 | 9.4  | 9.7  | 11.5 | 12.3 | 11.6 | 7.4  | 6.7  | 9.6  | 14.1 | 5.6  | 8.6  |
| Smim5    | 0.1  | 0.1  | 0.1  | 0.1  | 0.2  | 0.2  | 0.3  | 0.1  | 0.2  | 0.1  | 0.4  | 0.2  |
| Smim6    | 0.2  | 0.2  | 0.4  | 0.5  | 0.3  | 0.2  | 0.3  | 0.3  | 0.0  | 0.1  | 0.3  | 0.5  |
| Smim7    | 22.8 | 18.7 | 15.6 | 20.3 | 20.4 | 20.2 | 20.0 | 19.1 | 23.1 | 22.1 | 19.3 | 20.0 |
| Smim8    | 7.7  | 8.6  | 10.3 | 8.3  | 7.0  | 9.1  | 7.8  | 8.6  | 6.7  | 7.8  | 9.6  | 10.3 |
| Smim9    | 0.0  | 0.1  | 0.2  | 0.1  | 0.1  | 0.1  | 0.0  | 0.1  | 0.0  | 0.0  | 0.0  | 0.1  |
| Smlr1    | 0.1  | 0.1  | 0.1  | 0.0  | 0.0  | 0.0  | 0.0  | 0.0  | 0.0  | 0.0  | 0.0  | 0.0  |
| Smn1     | 6.0  | 6.6  | 5.1  | 7.8  | 5.8  | 4.9  | 7.3  | 7.2  | 6.3  | 6.6  | 6.8  | 5.7  |
| Smndc1   | 6.6  | 6.9  | 7.5  | 10.4 | 7.6  | 9.0  | 8.1  | 7.0  | 6.3  | 7.4  | 9.3  | 8.4  |
| Smo      | 25.2 | 22.4 | 21.3 | 19.8 | 17.9 | 23.4 | 22.9 | 24.6 | 23.5 | 26.6 | 23.6 | 23.2 |
| Smoc1    | 10.4 | 16.2 | 16.7 | 5.2  | 13.1 | 9.5  | 21.9 | 7.0  | 18.1 | 15.6 | 16.5 | 25.3 |
| Smoc2    | 17.6 | 10.8 | 16.6 | 26.9 | 18.9 | 14.6 | 25.9 | 15.7 | 13.4 | 9.5  | 9.1  | 10.3 |
| Smok4a   | 0.0  | 0.1  | 0.0  | 0.0  | 0.0  | 0.0  | 0.0  | 0.0  | 0.0  | 0.0  | 0.0  | 0.0  |
| Smox     | 5.8  | 4.9  | 3.9  | 9.0  | 8.6  | 5.9  | 5.7  | 3.9  | 4.0  | 4.6  | 3.7  | 4.3  |
| Smpd1    | 50.3 | 40.6 | 34.4 | 55.3 | 37.1 | 57.2 | 37.0 | 30.3 | 34.5 | 39.1 | 37.7 | 36.5 |
| Smpd2    | 9.2  | 10.9 | 8.0  | 8.4  | 7.9  | 9.6  | 9.4  | 9.5  | 11.2 | 10.5 | 9.9  | 10.8 |
| Smpd3    | 22.5 | 10.7 | 5.9  | 14.0 | 6.5  | 15.1 | 4.5  | 3.0  | 3.3  | 39.8 | 18.7 | 10.0 |
| Smpd4    | 3.5  | 3.5  | 3.7  | 3.9  | 3.9  | 4.0  | 4.1  | 4.0  | 3.7  | 2.9  | 3.7  | 3.1  |
| Smpd5    | 0.3  | 0.2  | 0.2  | 0.5  | 0.5  | 0.4  | 0.3  | 0.2  | 0.3  | 0.6  | 0.5  | 0.2  |
| Smpdl3a  | 49.0 | 35.6 | 36.7 | 57.1 | 45.9 | 42.2 | 31.4 | 40.8 | 36.1 | 25.5 | 34.2 | 37.5 |
| Smpdl3b  | 0.5  | 0.6  | 0.7  | 1.0  | 2.2  | 0.2  | 0.5  | 0.2  | 0.2  | 1.0  | 0.2  | 0.5  |
| Sms      | 4.7  | 3.9  | 3.3  | 5.5  | 5.2  | 4.8  | 4.5  | 2.7  | 3.1  | 3.8  | 3.7  | 3.8  |

Online Table 1

|          |      |       |       |      |       |      |       |       |       |       |       |       |
|----------|------|-------|-------|------|-------|------|-------|-------|-------|-------|-------|-------|
| Smtn     | 12.1 | 13.5  | 13.7  | 7.7  | 12.9  | 9.6  | 19.5  | 12.5  | 16.0  | 18.4  | 18.2  | 12.6  |
| Smtnl2   | 0.7  | 2.7   | 4.0   | 0.2  | 0.9   | 0.1  | 1.2   | 5.0   | 2.2   | 0.8   | 0.8   | 1.1   |
| Smu1     | 26.5 | 25.8  | 23.6  | 25.1 | 22.1  | 25.6 | 23.9  | 22.4  | 21.8  | 24.0  | 24.3  | 25.9  |
| Smug1    | 2.1  | 2.1   | 1.8   | 2.2  | 2.2   | 2.1  | 1.8   | 2.1   | 2.2   | 1.9   | 1.9   | 1.6   |
| Smurf1   | 16.8 | 17.4  | 15.7  | 16.1 | 18.4  | 18.9 | 24.4  | 17.7  | 19.9  | 14.4  | 18.0  | 17.4  |
| Smurf2   | 30.5 | 26.8  | 24.2  | 37.3 | 26.7  | 46.4 | 25.3  | 19.5  | 22.0  | 33.3  | 29.0  | 28.0  |
| Smyd1    | 0.2  | 0.1   | 0.1   | 0.2  | 0.1   | 0.1  | 0.1   | 0.1   | 0.1   | 0.3   | 0.1   | 0.1   |
| Smyd2    | 31.9 | 27.6  | 23.5  | 35.8 | 27.3  | 31.8 | 26.9  | 25.9  | 25.3  | 25.8  | 28.1  | 26.6  |
| Smyd3    | 2.4  | 2.2   | 1.9   | 2.6  | 1.7   | 2.9  | 1.3   | 1.8   | 1.5   | 1.7   | 1.9   | 2.0   |
| Smyd4    | 2.8  | 2.6   | 2.0   | 2.8  | 2.5   | 3.4  | 2.3   | 1.6   | 2.1   | 2.1   | 2.1   | 2.1   |
| Smyd5    | 9.1  | 7.2   | 5.2   | 9.8  | 8.9   | 9.3  | 8.6   | 7.4   | 6.2   | 6.5   | 8.3   | 5.8   |
| Snai1    | 5.5  | 11.8  | 16.6  | 5.9  | 11.8  | 7.1  | 14.2  | 17.7  | 14.7  | 8.0   | 9.5   | 9.5   |
| Snai2    | 2.3  | 4.2   | 7.0   | 2.5  | 4.7   | 4.3  | 4.2   | 6.0   | 4.4   | 3.6   | 4.6   | 4.4   |
| Snap23   | 27.3 | 29.1  | 26.3  | 32.9 | 29.1  | 26.8 | 26.4  | 28.0  | 24.7  | 29.4  | 33.7  | 32.1  |
| Snap29   | 20.6 | 20.4  | 17.9  | 22.0 | 19.4  | 18.2 | 25.5  | 18.6  | 20.2  | 18.1  | 26.0  | 22.9  |
| Snap47   | 63.6 | 57.5  | 46.5  | 60.2 | 46.7  | 58.6 | 46.3  | 48.0  | 42.4  | 51.4  | 50.0  | 45.7  |
| Snap91   | 0.2  | 0.1   | 0.0   | 0.2  | 0.0   | 0.2  | 0.2   | 0.0   | 0.0   | 0.1   | 0.1   | 0.1   |
| Snapc1   | 7.6  | 9.4   | 9.3   | 7.9  | 7.9   | 9.5  | 8.6   | 8.9   | 8.8   | 8.5   | 9.4   | 9.5   |
| Snapc2   | 10.3 | 10.8  | 9.4   | 8.3  | 9.0   | 10.2 | 10.4  | 9.2   | 11.1  | 11.0  | 10.1  | 9.0   |
| Snapc3   | 8.8  | 10.1  | 10.9  | 7.8  | 8.0   | 8.1  | 9.7   | 10.3  | 9.8   | 8.7   | 10.2  | 9.9   |
| Snapc4   | 2.6  | 2.2   | 2.3   | 3.3  | 2.5   | 2.7  | 2.9   | 2.2   | 2.4   | 2.1   | 2.0   | 1.7   |
| Snapc5   | 25.8 | 22.5  | 26.3  | 25.1 | 21.7  | 22.8 | 23.0  | 29.1  | 21.6  | 22.6  | 28.1  | 26.6  |
| Snopin   | 40.0 | 34.5  | 30.6  | 43.7 | 32.1  | 39.6 | 35.6  | 34.5  | 35.3  | 36.3  | 38.9  | 38.7  |
| Snca     | 0.1  | 0.0   | 0.0   | 0.0  | 0.1   | 0.0  | 0.0   | 0.0   | 0.0   | 0.0   | 0.0   | 0.0   |
| Sncaip   | 0.2  | 0.1   | 0.4   | 0.1  | 0.2   | 0.1  | 0.3   | 0.5   | 0.4   | 0.1   | 0.2   | 0.1   |
| Sncg     | 5.5  | 3.7   | 4.1   | 5.8  | 4.6   | 5.9  | 2.0   | 4.8   | 0.8   | 2.2   | 4.0   | 2.7   |
| Snd1     | 57.6 | 53.3  | 50.2  | 52.0 | 53.0  | 44.1 | 60.8  | 68.2  | 60.4  | 59.1  | 68.0  | 57.6  |
| Sned1    | 0.3  | 0.9   | 1.3   | 0.2  | 0.5   | 0.2  | 1.5   | 1.5   | 2.2   | 2.8   | 2.7   | 2.1   |
| Snf8     | 24.7 | 27.1  | 26.6  | 26.5 | 26.3  | 27.1 | 26.6  | 29.6  | 26.5  | 26.5  | 30.0  | 26.0  |
| Snhg1    | 30.8 | 21.1  | 19.6  | 15.8 | 25.6  | 22.5 | 30.3  | 24.9  | 27.2  | 32.1  | 32.0  | 31.8  |
| Snhg10   | 1.8  | 1.4   | 1.0   | 2.0  | 0.8   | 1.8  | 1.8   | 1.0   | 4.3   | 1.5   | 0.9   | 1.8   |
| Snhg11   | 1.8  | 2.4   | 1.2   | 2.2  | 1.3   | 1.9  | 0.8   | 0.4   | 0.4   | 0.2   | 0.5   | 0.3   |
| Snhg12   | 42.1 | 30.4  | 25.4  | 33.4 | 29.9  | 57.4 | 33.7  | 29.3  | 31.6  | 31.3  | 36.1  | 31.9  |
| Snhg3    | 5.5  | 6.3   | 6.9   | 9.7  | 7.4   | 7.8  | 7.4   | 8.0   | 7.8   | 9.7   | 8.8   | 8.3   |
| Snhg4    | 2.0  | 1.4   | 1.5   | 1.6  | 2.1   | 2.1  | 2.1   | 2.0   | 1.9   | 2.3   | 2.5   | 1.9   |
| Snhg5    | 12.2 | 9.6   | 10.9  | 10.9 | 8.7   | 9.3  | 12.1  | 11.8  | 13.4  | 13.8  | 15.7  | 13.3  |
| Snhg6    | 56.7 | 43.4  | 34.6  | 41.9 | 37.7  | 46.8 | 38.0  | 44.6  | 52.6  | 50.9  | 44.5  | 44.7  |
| Snhg7    | 3.0  | 3.2   | 2.4   | 4.4  | 3.2   | 3.7  | 4.3   | 2.4   | 2.8   | 2.6   | 2.3   | 2.5   |
| Snhg8    | 9.6  | 6.0   | 7.0   | 5.8  | 7.4   | 8.2  | 5.1   | 6.2   | 6.5   | 6.9   | 8.5   | 6.5   |
| Snhg9    | 19.6 | 8.0   | 7.1   | 8.6  | 6.5   | 11.9 | 10.1  | 8.7   | 14.0  | 9.3   | 7.7   | 11.0  |
| Snip1    | 8.5  | 7.7   | 7.9   | 8.3  | 8.5   | 6.7  | 7.3   | 8.2   | 9.1   | 10.2  | 9.3   | 8.8   |
| Snn      | 11.3 | 7.0   | 5.1   | 12.7 | 8.0   | 10.5 | 9.2   | 6.8   | 7.9   | 11.3  | 11.9  | 9.5   |
| Snora15  | 4.0  | 4.8   | 0.0   | 0.0  | 16.7  | 10.0 | 0.0   | 12.2  | 16.2  | 9.0   | 6.4   | 7.7   |
| Snora16a | 36.2 | 39.5  | 50.5  | 20.7 | 29.8  | 24.4 | 33.5  | 44.2  | 65.5  | 34.8  | 33.5  | 79.8  |
| Snora17  | 56.3 | 34.3  | 51.5  | 20.4 | 65.5  | 27.7 | 42.1  | 54.5  | 58.4  | 54.2  | 41.5  | 50.4  |
| Snora21  | 21.6 | 21.2  | 33.4  | 6.6  | 53.3  | 3.2  | 12.1  | 13.0  | 87.2  | 47.9  | 28.8  | 47.3  |
| Snora23  | 34.1 | 37.1  | 44.4  | 18.8 | 43.6  | 20.9 | 34.7  | 35.8  | 51.0  | 60.7  | 37.7  | 63.5  |
| Snora24  | 0.0  | 27.6  | 19.1  | 3.6  | 13.0  | 0.0  | 0.0   | 14.0  | 51.6  | 13.7  | 1.5   | 0.0   |
| Snora26  | 43.4 | 48.8  | 71.5  | 3.1  | 40.7  | 6.9  | 17.7  | 44.2  | 102.1 | 55.1  | 3.0   | 54.9  |
| Snora28  | 61.3 | 102.2 | 133.7 | 29.5 | 186.0 | 61.4 | 115.8 | 120.0 | 201.6 | 127.8 | 51.5  | 130.4 |
| Snora3   | 16.8 | 36.9  | 13.9  | 26.2 | 45.5  | 21.3 | 20.0  | 24.3  | 20.6  | 3.8   | 48.3  | 42.9  |
| Snora30  | 12.2 | 22.5  | 9.7   | 38.0 | 34.9  | 15.3 | 5.8   | 6.2   | 43.0  | 13.8  | 20.0  | 58.1  |
| Snora31  | 4.8  | 11.6  | 0.0   | 0.0  | 23.7  | 12.0 | 4.6   | 4.9   | 19.3  | 10.8  | 0.0   | 45.9  |
| Snora33  | 20.4 | 16.7  | 26.8  | 25.2 | 16.6  | 25.5 | 6.4   | 0.0   | 20.4  | 15.4  | 22.4  | 32.2  |
| Snora34  | 62.0 | 53.4  | 12.0  | 0.0  | 39.9  | 23.1 | 18.0  | 22.5  | 70.8  | 70.1  | 11.7  | 10.7  |
| Snora43  | 7.0  | 4.2   | 9.0   | 2.4  | 4.6   | 6.7  | 10.8  | 11.1  | 10.9  | 15.9  | 0.0   | 1.8   |
| Snora44  | 60.9 | 111.4 | 153.0 | 39.3 | 96.0  | 48.2 | 60.0  | 105.5 | 108.7 | 180.6 | 146.3 | 133.7 |

Online Table 1

|          |        |        |        |        |         |        |        |        |         |         |        |        |
|----------|--------|--------|--------|--------|---------|--------|--------|--------|---------|---------|--------|--------|
| Snora47  | 0.0    | 0.0    | 0.0    | 0.0    | 6.8     | 3.4    | 7.3    | 6.3    | 19.2    | 0.0     | 0.0    | 2.7    |
| Snora52  | 6.1    | 12.4   | 19.0   | 2.7    | 14.1    | 5.2    | 8.4    | 6.4    | 4.2     | 11.6    | 9.7    | 10.3   |
| Snora5c  | 17.1   | 21.0   | 33.2   | 20.7   | 34.1    | 10.6   | 7.9    | 77.1   | 25.5    | 58.0    | 0.0    | 40.1   |
| Snora62  | 19.9   | 18.1   | 27.2   | 9.9    | 29.8    | 9.5    | 25.2   | 20.7   | 23.1    | 14.1    | 15.8   | 37.3   |
| Snora64  | 15.2   | 9.3    | 20.3   | 4.9    | 22.4    | 28.9   | 18.8   | 7.8    | 38.8    | 64.5    | 18.3   | 18.6   |
| Snora65  | 0.0    | 4.4    | 0.0    | 0.0    | 3.1     | 4.6    | 7.2    | 7.5    | 7.4     | 4.1     | 5.8    | 0.0    |
| Snora68  | 132.7  | 101.0  | 62.7   | 0.0    | 112.9   | 114.2  | 56.2   | 91.9   | 182.4   | 138.9   | 17.4   | 85.7   |
| Snora69  | 0.0    | 7.6    | 0.0    | 0.0    | 5.3     | 7.9    | 0.0    | 3.2    | 6.4     | 10.5    | 0.0    | 0.0    |
| Snora70  | 24.0   | 73.0   | 54.6   | 22.4   | 84.5    | 30.6   | 56.1   | 40.1   | 173.4   | 89.8    | 76.4   | 72.3   |
| Snora74a | 932.0  | 947.3  | 859.3  | 582.1  | 1101.6  | 831.7  | 622.4  | 881.0  | 1352.6  | 1047.6  | 586.4  | 773.5  |
| Snora78  | 410.4  | 359.2  | 244.2  | 211.6  | 312.5   | 226.6  | 196.9  | 210.9  | 451.3   | 423.4   | 147.1  | 195.7  |
| Snora7a  | 834.0  | 983.8  | 1207.7 | 498.5  | 1200.2  | 617.8  | 699.9  | 936.8  | 1749.3  | 1333.6  | 504.4  | 966.0  |
| Snora81  | 13.1   | 30.9   | 31.6   | 5.3    | 35.9    | 24.2   | 38.3   | 33.1   | 49.6    | 47.8    | 47.5   | 42.5   |
| Snord100 | 751.9  | 161.5  | 336.8  | 265.1  | 340.8   | 308.2  | 203.6  | 612.0  | 1227.5  | 734.3   | 0.0    | 231.2  |
| Snord104 | 1494.2 | 1733.6 | 2058.4 | 1309.3 | 2392.6  | 1136.3 | 1416.3 | 3215.4 | 3052.0  | 2499.2  | 1433.1 | 3083.9 |
| Snord110 | 2211.4 | 0.0    | 1436.0 | 454.3  | 2588.7  | 0.0    | 0.0    | 1680.3 | 4040.0  | 1508.8  | 0.0    | 3630.5 |
| Snord116 | 1.7    | 0.0    | 0.0    | 0.0    | 0.0     | 0.0    | 0.0    | 2.8    | 1.7     | 1.9     | 0.0    | 1.9    |
| Snord12  | 483.5  | 623.8  | 321.9  | 0.0    | 650.0   | 0.0    | 0.0    | 941.0  | 792.6   | 1130.7  | 0.0    | 1486.2 |
| Snord15a | 202.0  | 216.7  | 230.7  | 88.4   | 228.3   | 136.3  | 146.0  | 196.2  | 413.5   | 235.4   | 166.3  | 263.5  |
| Snord15b | 665.0  | 1047.5 | 960.2  | 251.2  | 899.4   | 538.6  | 550.7  | 707.0  | 1470.9  | 1088.2  | 739.5  | 1148.9 |
| Snord16a | 330.5  | 117.8  | 117.8  | 165.6  | 386.9   | 77.8   | 183.0  | 156.5  | 449.3   | 538.8   | 56.5   | 233.1  |
| Snord17  | 449.8  | 372.3  | 342.8  | 335.5  | 466.2   | 368.2  | 289.1  | 404.1  | 731.6   | 537.0   | 332.6  | 378.0  |
| Snord1c  | 87.0   | 0.0    | 92.2   | 0.0    | 62.7    | 0.0    | 36.9   | 42.9   | 127.1   | 202.3   | 0.0    | 0.0    |
| Snord22  | 1253.3 | 1601.5 | 1098.0 | 427.0  | 1388.3  | 689.5  | 584.6  | 921.3  | 2780.0  | 2068.0  | 888.4  | 1750.7 |
| Snord32a | 1401.9 | 1437.3 | 1267.5 | 1123.6 | 1809.1  | 697.7  | 1346.9 | 1516.8 | 2605.0  | 2241.5  | 932.7  | 1999.2 |
| Snord33  | 337.8  | 504.8  | 486.2  | 242.2  | 633.0   | 0.0    | 397.1  | 516.0  | 1229.0  | 922.9   | 242.1  | 565.9  |
| Snord34  | 967.0  | 831.8  | 858.4  | 0.0    | 1733.4  | 198.4  | 1039.7 | 784.2  | 2536.2  | 753.8   | 0.0    | 743.1  |
| Snord35a | 451.1  | 586.7  | 308.0  | 41.9   | 686.9   | 244.9  | 176.1  | 286.7  | 737.2   | 701.8   | 197.8  | 383.5  |
| Snord35b | 22.4   | 0.0    | 0.0    | 0.0    | 67.4    | 82.9   | 0.0    | 0.0    | 22.0    | 0.0     | 0.0    | 0.0    |
| Snord47  | 0.0    | 949.1  | 731.2  | 0.0    | 368.8   | 1586.0 | 0.0    | 1606.6 | 5441.2  | 4077.1  | 3727.6 | 2881.1 |
| Snord49a | 2520.8 | 5773.5 | 2750.2 | 0.0    | 5349.6  | 346.4  | 1339.4 | 4848.5 | 7547.0  | 5176.8  | 2955.0 | 3856.0 |
| Snord49b | 6303.1 | 8126.3 | 6160.1 | 4534.7 | 10908.6 | 1796.5 | 2518.4 | 9124.3 | 21914.8 | 11248.3 | 2526.6 | 9807.5 |
| Snord55  | 173.9  | 221.4  | 122.9  | 48.1   | 658.0   | 53.4   | 147.4  | 128.7  | 508.3   | 455.3   | 180.8  | 160.3  |
| Snord57  | 242.4  | 312.6  | 955.9  | 0.0    | 1123.0  | 0.0    | 774.9  | 1169.8 | 2408.2  | 1687.3  | 1263.3 | 1337.4 |
| Snord67  | 0.0    | 63.1   | 7.8    | 0.0    | 8.1     | 0.0    | 0.0    | 10.2   | 0.0     | 11.6    | 17.4   | 9.5    |
| Snord8   | 0.0    | 59.5   | 29.7   | 11.6   | 68.7    | 0.0    | 17.7   | 0.0    | 19.1    | 65.4    | 16.4   | 63.0   |
| Snord82  | 751.9  | 2261.4 | 926.2  | 0.0    | 1022.6  | 0.0    | 101.8  | 1224.0 | 2700.4  | 1174.9  | 606.6  | 2196.5 |
| Snord83b | 2768.3 | 1946.9 | 2415.6 | 789.1  | 2975.9  | 1113.8 | 1289.1 | 2493.3 | 5439.1  | 3447.7  | 1207.6 | 2023.8 |
| Snord87  | 0.0    | 82.1   | 133.2  | 0.0    | 0.0     | 0.0    | 0.0    | 63.1   | 249.9   | 375.1   | 141.3  | 0.0    |
| Snord89  | 142.7  | 193.4  | 157.1  | 122.7  | 423.8   | 0.0    | 58.7   | 206.9  | 371.6   | 221.4   | 91.0   | 349.3  |
| Snord95  | 0.0    | 0.0    | 0.0    | 0.0    | 0.0     | 0.0    | 0.0    | 122.4  | 245.5   | 0.0     | 0.0    | 0.0    |
| Snord99  | 0.0    | 1848.4 | 471.6  | 0.0    | 0.0     | 0.0    | 573.7  | 0.0    | 0.0     | 1619.3  | 0.0    | 657.8  |
| Snph     | 0.0    | 0.0    | 0.0    | 0.0    | 0.0     | 0.1    | 0.0    | 0.0    | 0.0     | 0.1     | 0.0    | 0.0    |
| Snrk     | 10.2   | 10.8   | 10.5   | 8.7    | 9.2     | 9.6    | 9.8    | 10.7   | 11.7    | 9.7     | 9.9    | 10.8   |
| Snrnp200 | 22.1   | 21.5   | 21.7   | 23.1   | 21.8    | 23.9   | 20.8   | 21.9   | 18.3    | 20.8    | 21.2   | 20.6   |
| Snrnp25  | 11.8   | 13.2   | 8.4    | 13.0   | 8.7     | 12.6   | 10.6   | 10.2   | 9.6     | 6.4     | 8.7    | 7.9    |
| Snrnp27  | 52.7   | 40.5   | 45.9   | 60.9   | 38.9    | 56.1   | 41.1   | 42.1   | 34.2    | 41.9    | 50.3   | 50.9   |
| Snrnp35  | 4.1    | 3.9    | 4.0    | 5.2    | 3.4     | 4.2    | 3.8    | 3.8    | 4.4     | 4.1     | 4.0    | 4.4    |
| Snrnp40  | 10.0   | 10.4   | 11.2   | 8.0    | 10.0    | 7.8    | 10.5   | 12.4   | 10.7    | 10.2    | 11.7   | 10.3   |
| Snrnp48  | 12.2   | 11.8   | 12.7   | 10.7   | 10.5    | 12.0   | 9.4    | 10.4   | 9.7     | 13.2    | 14.1   | 13.2   |
| Snrnp70  | 49.8   | 53.1   | 64.6   | 59.4   | 55.0    | 50.8   | 75.4   | 64.2   | 57.3    | 53.1    | 65.3   | 58.1   |
| Snrpa    | 20.4   | 20.9   | 21.1   | 23.8   | 21.5    | 23.3   | 19.6   | 24.0   | 19.8    | 22.3    | 21.7   | 18.7   |
| Snrpa1   | 23.7   | 18.7   | 16.7   | 30.1   | 21.1    | 22.5   | 25.1   | 14.2   | 15.6    | 16.1    | 18.2   | 15.5   |
| Snrpb    | 74.6   | 74.1   | 60.0   | 64.2   | 72.8    | 63.2   | 67.5   | 62.5   | 76.5    | 78.2    | 61.9   | 57.6   |
| Snrpb2   | 20.6   | 21.5   | 21.0   | 23.9   | 21.8    | 23.0   | 20.8   | 20.3   | 19.7    | 27.2    | 21.9   | 24.1   |
| Snrpc    | 32.0   | 32.7   | 31.4   | 36.7   | 32.4    | 35.9   | 34.7   | 32.5   | 32.5    | 33.8    | 33.7   | 30.2   |
| Snrpd1   | 34.9   | 32.9   | 38.8   | 35.6   | 31.0    | 34.0   | 35.3   | 32.7   | 29.5    | 41.1    | 46.0   | 40.6   |

Online Table 1



|        |       |       |       |       |       |       |       |       |       |       |       |       |
|--------|-------|-------|-------|-------|-------|-------|-------|-------|-------|-------|-------|-------|
| Snrpd2 | 114.2 | 100.6 | 77.0  | 106.4 | 88.4  | 105.3 | 88.1  | 97.2  | 82.8  | 87.0  | 87.2  | 78.6  |
| Snrpd3 | 30.4  | 29.4  | 30.6  | 34.0  | 35.2  | 34.2  | 28.4  | 33.4  | 24.6  | 31.8  | 34.6  | 39.7  |
| Snrpe  | 89.2  | 84.2  | 66.7  | 74.7  | 89.8  | 75.3  | 61.4  | 74.4  | 79.2  | 92.1  | 76.6  | 68.2  |
| Snrpf  | 22.6  | 18.5  | 21.5  | 23.5  | 19.2  | 22.3  | 22.6  | 25.9  | 18.1  | 21.5  | 25.2  | 25.6  |
| Snrpg  | 99.4  | 83.3  | 82.1  | 79.5  | 83.1  | 77.1  | 68.0  | 78.7  | 79.8  | 89.3  | 92.1  | 71.0  |
| Snrpn  | 13.5  | 10.0  | 8.6   | 12.5  | 8.5   | 12.6  | 10.1  | 8.2   | 8.4   | 8.2   | 11.2  | 8.8   |
| Snta1  | 6.8   | 7.3   | 6.3   | 4.4   | 4.4   | 5.0   | 5.8   | 6.6   | 11.4  | 12.5  | 8.9   | 10.0  |
| Sntb1  | 0.4   | 0.7   | 1.5   | 0.1   | 0.9   | 0.3   | 0.7   | 2.1   | 1.0   | 0.3   | 0.5   | 1.0   |
| Sntb2  | 15.3  | 18.7  | 18.1  | 13.1  | 14.9  | 12.7  | 13.6  | 13.2  | 12.6  | 18.6  | 13.2  | 15.9  |
| Sntg1  | 0.4   | 0.2   | 0.0   | 0.8   | 0.1   | 0.4   | 0.1   | 0.0   | 0.1   | 0.1   | 0.1   | 0.0   |
| Sntg2  | 0.6   | 0.6   | 0.9   | 0.1   | 0.0   | 0.1   | 0.0   | 0.5   | 0.2   | 0.3   | 0.3   | 0.4   |
| Snupn  | 10.4  | 9.7   | 8.8   | 10.9  | 9.2   | 10.0  | 7.3   | 7.3   | 7.6   | 12.2  | 10.5  | 10.1  |
| Snurf  | 0.9   | 0.7   | 0.6   | 1.0   | 0.5   | 0.8   | 0.7   | 0.7   | 0.6   | 0.8   | 1.2   | 0.8   |
| Snw1   | 53.5  | 48.4  | 51.0  | 59.7  | 39.3  | 52.8  | 38.7  | 38.9  | 32.5  | 40.7  | 43.4  | 45.8  |
| Snx1   | 48.3  | 51.2  | 48.5  | 61.3  | 55.2  | 51.8  | 49.6  | 49.4  | 48.6  | 50.1  | 55.4  | 55.7  |
| Snx10  | 25.4  | 20.2  | 19.5  | 28.6  | 25.5  | 22.5  | 19.4  | 19.8  | 17.6  | 22.6  | 26.9  | 21.5  |
| Snx11  | 9.4   | 8.8   | 6.9   | 8.9   | 9.1   | 9.8   | 9.4   | 7.4   | 9.4   | 7.3   | 8.3   | 8.0   |
| Snx12  | 24.5  | 24.2  | 22.3  | 24.1  | 22.8  | 24.7  | 23.7  | 23.8  | 23.8  | 23.1  | 24.8  | 26.6  |
| Snx13  | 10.4  | 11.7  | 12.2  | 10.8  | 10.8  | 10.6  | 11.0  | 11.2  | 12.9  | 11.7  | 13.1  | 14.8  |
| Snx14  | 17.5  | 19.6  | 18.6  | 15.5  | 17.3  | 16.5  | 18.3  | 18.0  | 19.6  | 18.7  | 20.0  | 19.9  |
| Snx15  | 7.2   | 8.0   | 7.0   | 9.5   | 8.4   | 8.6   | 7.5   | 8.3   | 8.3   | 7.2   | 7.0   | 5.6   |
| Snx16  | 4.6   | 5.0   | 4.3   | 5.3   | 4.0   | 5.8   | 3.5   | 3.5   | 3.5   | 4.9   | 5.4   | 4.3   |
| Snx17  | 32.2  | 30.6  | 25.2  | 32.3  | 28.6  | 32.2  | 25.2  | 27.8  | 27.8  | 28.4  | 25.6  | 25.2  |
| Snx18  | 33.0  | 31.1  | 29.7  | 29.3  | 32.1  | 30.7  | 33.4  | 27.7  | 27.9  | 28.5  | 31.5  | 31.8  |
| Snx19  | 12.0  | 11.8  | 11.8  | 11.7  | 10.9  | 11.0  | 12.6  | 11.9  | 12.2  | 11.1  | 10.8  | 11.8  |
| Snx2   | 43.9  | 37.8  | 37.0  | 45.9  | 40.9  | 37.6  | 36.3  | 35.2  | 31.6  | 37.7  | 41.6  | 41.1  |
| Snx20  | 0.6   | 0.1   | 0.1   | 4.9   | 8.3   | 0.1   | 0.7   | 0.1   | 0.1   | 1.0   | 0.2   | 0.7   |
| Snx21  | 9.3   | 9.4   | 8.5   | 9.2   | 7.3   | 10.3  | 8.6   | 9.6   | 10.1  | 9.3   | 8.9   | 8.6   |
| Snx22  | 38.5  | 32.7  | 33.2  | 38.8  | 30.6  | 31.9  | 29.6  | 34.5  | 33.0  | 33.1  | 33.3  | 36.7  |
| Snx24  | 11.4  | 10.4  | 8.3   | 9.8   | 9.4   | 11.3  | 9.2   | 8.4   | 9.0   | 10.8  | 9.7   | 8.6   |
| Snx25  | 9.4   | 12.8  | 9.8   | 8.0   | 9.3   | 11.1  | 10.5  | 8.6   | 10.9  | 8.0   | 9.6   | 10.0  |
| Snx27  | 8.1   | 8.4   | 8.0   | 7.4   | 8.2   | 7.7   | 7.6   | 7.2   | 7.5   | 7.6   | 7.4   | 6.5   |
| Snx29  | 1.8   | 2.0   | 1.9   | 3.1   | 2.4   | 2.1   | 1.5   | 1.9   | 1.9   | 2.6   | 2.3   | 2.1   |
| Snx3   | 65.5  | 59.9  | 53.5  | 73.0  | 60.5  | 66.9  | 63.4  | 57.1  | 53.8  | 61.6  | 65.5  | 63.0  |
| Snx30  | 7.6   | 6.8   | 5.1   | 9.4   | 7.6   | 7.8   | 6.7   | 4.2   | 6.8   | 6.7   | 6.3   | 6.0   |
| Snx31  | 0.0   | 0.1   | 0.1   | 0.1   | 0.1   | 0.1   | 0.1   | 0.0   | 0.1   | 0.1   | 0.1   | 0.0   |
| Snx32  | 7.0   | 6.6   | 6.6   | 6.9   | 4.9   | 9.4   | 4.6   | 5.3   | 5.1   | 5.7   | 5.6   | 6.0   |
| Snx33  | 13.8  | 14.2  | 14.0  | 13.2  | 11.4  | 13.4  | 12.0  | 13.4  | 12.9  | 14.4  | 13.4  | 13.3  |
| Snx4   | 36.7  | 35.4  | 40.4  | 41.0  | 35.1  | 37.1  | 39.8  | 40.6  | 37.0  | 35.7  | 45.9  | 41.8  |
| Snx5   | 39.0  | 29.9  | 26.9  | 36.6  | 34.8  | 36.8  | 24.3  | 33.7  | 27.1  | 32.4  | 34.5  | 31.5  |
| Snx6   | 34.9  | 35.8  | 34.5  | 36.3  | 35.3  | 37.1  | 33.1  | 33.3  | 36.3  | 38.2  | 39.1  | 36.0  |
| Snx7   | 31.5  | 28.2  | 31.3  | 24.7  | 28.5  | 19.8  | 38.9  | 31.1  | 38.9  | 44.8  | 54.0  | 41.6  |
| Snx8   | 6.8   | 6.2   | 4.3   | 10.0  | 7.5   | 6.4   | 5.6   | 4.9   | 5.0   | 5.2   | 4.8   | 5.0   |
| Snx9   | 48.6  | 41.4  | 42.9  | 48.6  | 42.2  | 56.4  | 54.3  | 41.5  | 45.7  | 53.5  | 46.8  | 54.9  |
| Soat1  | 13.6  | 14.3  | 17.0  | 17.0  | 20.2  | 15.2  | 18.0  | 14.3  | 15.3  | 23.7  | 19.0  | 19.6  |
| Soat2  | 0.3   | 0.1   | 0.1   | 0.3   | 0.2   | 0.6   | 0.2   | 0.6   | 0.2   | 0.1   | 0.2   | 0.1   |
| Sobp   | 0.8   | 1.3   | 1.2   | 0.8   | 1.1   | 0.8   | 1.1   | 1.0   | 1.0   | 0.6   | 0.7   | 0.9   |
| Socs1  | 0.6   | 0.5   | 0.6   | 0.3   | 0.5   | 0.4   | 0.5   | 1.1   | 1.1   | 0.6   | 0.3   | 0.6   |
| Socs2  | 17.4  | 20.3  | 22.8  | 14.4  | 15.1  | 16.9  | 16.9  | 20.4  | 16.7  | 15.0  | 12.0  | 19.8  |
| Socs3  | 5.2   | 12.4  | 19.1  | 3.8   | 10.7  | 2.0   | 12.6  | 24.9  | 17.9  | 17.9  | 11.9  | 16.2  |
| Socs4  | 8.2   | 7.5   | 7.4   | 7.6   | 8.1   | 7.1   | 7.8   | 6.7   | 6.4   | 5.9   | 7.6   | 7.3   |
| Socs5  | 22.2  | 24.7  | 24.7  | 15.8  | 22.2  | 17.8  | 21.1  | 20.9  | 23.9  | 26.8  | 23.7  | 28.4  |
| Socs6  | 7.8   | 7.4   | 6.2   | 8.9   | 7.3   | 9.1   | 6.7   | 6.7   | 7.1   | 7.5   | 8.0   | 7.3   |
| Socs7  | 3.6   | 3.2   | 2.6   | 3.7   | 3.1   | 3.4   | 2.9   | 2.1   | 2.6   | 3.5   | 3.2   | 3.0   |
| Sod1   | 361.3 | 292.9 | 262.8 | 361.2 | 284.2 | 384.5 | 267.4 | 254.1 | 242.5 | 340.8 | 295.8 | 289.5 |
| Sod2   | 21.1  | 18.7  | 27.7  | 22.9  | 35.1  | 16.2  | 27.2  | 25.9  | 20.4  | 18.3  | 19.3  | 20.6  |
| Sod3   | 66.8  | 63.2  | 96.6  | 107.5 | 81.8  | 52.7  | 98.1  | 90.2  | 69.8  | 45.2  | 43.2  | 68.5  |

Online Table 1

|        |        |        |        |        |        |        |        |        |        |        |        |        |
|--------|--------|--------|--------|--------|--------|--------|--------|--------|--------|--------|--------|--------|
| Soga2  | 1.0    | 1.0    | 0.7    | 1.1    | 0.8    | 1.2    | 0.8    | 0.6    | 0.7    | 0.8    | 0.7    | 0.6    |
| Soga3  | 0.1    | 0.0    | 0.0    | 0.0    | 0.0    | 0.0    | 0.1    | 0.0    | 0.0    | 0.0    | 0.0    | 0.0    |
| Sohlh2 | 0.1    | 0.0    | 0.0    | 0.0    | 0.0    | 0.0    | 0.0    | 0.0    | 0.0    | 0.1    | 0.1    | 0.0    |
| Solh   | 0.9    | 1.2    | 1.2    | 1.2    | 1.6    | 1.2    | 1.6    | 1.6    | 1.6    | 1.3    | 1.1    | 1.0    |
| Son    | 35.5   | 39.3   | 38.5   | 34.1   | 37.1   | 33.3   | 34.8   | 38.2   | 38.9   | 38.4   | 38.4   | 40.3   |
| Sorbs1 | 10.8   | 12.7   | 12.0   | 11.9   | 10.3   | 14.0   | 16.0   | 9.0    | 18.4   | 11.6   | 15.7   | 14.5   |
| Sorbs2 | 11.1   | 11.6   | 12.0   | 16.3   | 9.9    | 20.0   | 8.7    | 6.4    | 7.6    | 2.4    | 5.5    | 6.1    |
| Sorbs3 | 12.7   | 17.9   | 17.2   | 10.2   | 8.7    | 11.1   | 15.3   | 15.0   | 12.1   | 17.5   | 15.8   | 13.9   |
| Sorcs1 | 0.1    | 0.0    | 0.0    | 0.1    | 0.0    | 0.1    | 0.0    | 0.0    | 0.0    | 0.5    | 0.2    | 0.1    |
| Sorcs2 | 0.2    | 0.2    | 0.3    | 0.1    | 0.3    | 0.2    | 0.3    | 1.1    | 0.6    | 1.4    | 1.2    | 0.7    |
| Sorcs3 | 0.0    | 0.0    | 0.0    | 0.1    | 0.0    | 0.0    | 0.0    | 0.0    | 0.0    | 0.0    | 0.0    | 0.0    |
| Sord   | 9.7    | 11.6   | 12.5   | 7.8    | 8.5    | 11.8   | 5.1    | 14.0   | 8.3    | 8.3    | 10.0   | 8.6    |
| Sorl1  | 0.4    | 0.3    | 0.4    | 1.0    | 2.4    | 0.4    | 0.3    | 0.2    | 0.2    | 0.3    | 0.2    | 0.3    |
| Sort1  | 2.3    | 1.7    | 1.5    | 1.5    | 1.1    | 2.2    | 0.6    | 1.5    | 1.1    | 3.5    | 1.9    | 1.2    |
| Sos1   | 2.8    | 3.7    | 3.7    | 3.3    | 3.0    | 3.6    | 3.2    | 2.8    | 3.0    | 2.8    | 3.4    | 3.1    |
| Sos2   | 6.0    | 6.9    | 6.1    | 6.1    | 6.0    | 6.2    | 6.3    | 5.2    | 6.1    | 5.5    | 6.5    | 6.6    |
| Sost   | 0.0    | 0.0    | 0.0    | 0.0    | 0.0    | 0.0    | 0.0    | 0.0    | 0.0    | 0.0    | 0.0    | 0.0    |
| Sowahb | 0.0    | 0.0    | 0.0    | 0.0    | 0.0    | 0.0    | 0.0    | 0.0    | 0.0    | 0.0    | 0.0    | 0.0    |
| Sowahc | 1.9    | 2.2    | 3.1    | 2.3    | 2.6    | 2.4    | 2.6    | 2.5    | 2.1    | 2.9    | 2.6    | 2.9    |
| Sowahd | 0.1    | 0.1    | 0.2    | 0.0    | 0.1    | 0.0    | 0.0    | 0.4    | 0.4    | 0.4    | 0.5    | 0.1    |
| Sox10  | 0.1    | 0.0    | 0.0    | 0.0    | 0.0    | 0.0    | 0.0    | 0.0    | 0.0    | 0.0    | 0.0    | 0.0    |
| Sox11  | 0.1    | 0.0    | 0.0    | 0.1    | 0.1    | 0.0    | 0.1    | 0.0    | 0.1    | 0.7    | 1.0    | 0.4    |
| Sox12  | 1.0    | 1.2    | 1.6    | 1.0    | 1.0    | 0.8    | 1.4    | 2.1    | 1.9    | 1.7    | 1.4    | 1.2    |
| Sox13  | 1.2    | 1.5    | 1.4    | 0.8    | 1.0    | 1.3    | 1.1    | 1.1    | 1.3    | 0.9    | 1.0    | 0.9    |
| Sox15  | 0.4    | 0.1    | 1.2    | 0.1    | 1.1    | 0.1    | 0.0    | 0.3    | 0.1    | 1.6    | 0.0    | 1.1    |
| Sox17  | 0.2    | 0.1    | 0.1    | 0.0    | 0.0    | 0.0    | 0.1    | 0.2    | 0.2    | 0.0    | 0.1    | 0.0    |
| Sox18  | 0.3    | 0.0    | 0.2    | 0.1    | 0.0    | 0.1    | 0.2    | 0.4    | 0.4    | 0.1    | 0.2    | 0.2    |
| Sox21  | 0.0    | 0.0    | 0.0    | 0.0    | 0.0    | 0.0    | 0.0    | 0.0    | 0.0    | 0.0    | 0.0    | 0.0    |
| Sox2ot | 0.0    | 0.0    | 0.0    | 0.0    | 0.0    | 0.0    | 0.0    | 0.0    | 0.0    | 0.0    | 0.0    | 0.0    |
| Sox30  | 0.0    | 0.1    | 0.1    | 0.1    | 0.0    | 0.1    | 0.0    | 0.0    | 0.0    | 0.1    | 0.0    | 0.0    |
| Sox4   | 23.8   | 18.4   | 17.3   | 25.6   | 14.2   | 23.5   | 13.4   | 16.1   | 14.5   | 24.7   | 17.8   | 16.7   |
| Sox5   | 1.8    | 2.4    | 2.9    | 1.7    | 2.3    | 1.9    | 2.3    | 2.3    | 2.5    | 1.9    | 2.0    | 2.3    |
| Sox6   | 0.6    | 0.3    | 0.5    | 0.1    | 0.1    | 0.1    | 0.2    | 0.5    | 0.2    | 0.5    | 0.4    | 0.4    |
| Sox7   | 0.3    | 0.2    | 0.3    | 0.4    | 0.4    | 0.2    | 0.2    | 0.2    | 0.3    | 0.1    | 0.1    | 0.1    |
| Sox8   | 0.5    | 0.3    | 0.5    | 0.5    | 0.4    | 0.4    | 0.2    | 0.6    | 0.4    | 0.5    | 0.7    | 0.4    |
| Sox9   | 3.0    | 4.6    | 6.3    | 3.5    | 5.6    | 3.2    | 8.8    | 8.4    | 6.5    | 3.6    | 5.0    | 4.2    |
| Sp1    | 5.5    | 6.8    | 7.4    | 5.4    | 6.9    | 7.0    | 6.7    | 8.2    | 7.3    | 7.7    | 8.0    | 7.8    |
| Sp100  | 17.3   | 17.7   | 23.8   | 31.3   | 22.9   | 21.7   | 16.8   | 14.0   | 14.5   | 15.0   | 14.5   | 20.7   |
| Sp110  | 7.8    | 7.5    | 9.9    | 14.5   | 10.9   | 8.2    | 8.5    | 6.0    | 6.1    | 6.3    | 5.7    | 8.9    |
| Sp140  | 5.8    | 6.4    | 8.2    | 4.7    | 6.6    | 4.7    | 4.0    | 4.9    | 4.3    | 4.8    | 4.6    | 6.0    |
| Sp2    | 0.3    | 0.5    | 0.5    | 0.6    | 0.7    | 0.5    | 0.9    | 0.8    | 0.7    | 0.5    | 0.5    | 0.4    |
| Sp3    | 23.3   | 28.0   | 38.5   | 23.7   | 23.1   | 22.0   | 24.5   | 35.2   | 27.8   | 28.3   | 30.5   | 34.4   |
| Sp4    | 1.1    | 1.4    | 1.7    | 1.2    | 1.2    | 1.0    | 1.1    | 1.5    | 1.2    | 1.2    | 1.3    | 1.5    |
| Sp6    | 0.2    | 0.3    | 0.3    | 0.2    | 0.2    | 0.3    | 0.2    | 0.1    | 0.2    | 0.1    | 0.1    | 0.2    |
| Sp7    | 0.0    | 0.0    | 0.0    | 0.0    | 0.0    | 0.0    | 0.0    | 0.0    | 0.0    | 0.0    | 0.0    | 0.0    |
| Sp9    | 0.2    | 0.2    | 0.1    | 0.1    | 0.1    | 0.1    | 0.1    | 0.0    | 0.0    | 0.1    | 0.1    | 0.0    |
| Spa17  | 2.0    | 1.7    | 2.6    | 3.4    | 1.3    | 3.1    | 1.7    | 1.9    | 1.2    | 0.9    | 0.7    | 2.7    |
| Spaca1 | 3.9    | 1.7    | 1.9    | 1.3    | 1.3    | 1.8    | 2.5    | 0.7    | 1.2    | 1.3    | 2.5    | 2.3    |
| Spaca4 | 0.0    | 0.2    | 0.1    | 0.0    | 0.0    | 0.0    | 0.0    | 0.0    | 0.1    | 0.1    | 0.0    | 0.1    |
| Spag1  | 1.0    | 1.3    | 1.2    | 0.9    | 1.2    | 0.9    | 0.9    | 1.0    | 0.9    | 0.8    | 0.8    | 1.0    |
| Spag17 | 0.0    | 0.0    | 0.0    | 0.0    | 0.0    | 0.0    | 0.0    | 0.0    | 0.0    | 0.0    | 0.0    | 0.0    |
| Spag4  | 1.7    | 1.3    | 1.4    | 1.3    | 1.3    | 2.1    | 1.5    | 0.7    | 1.8    | 1.1    | 1.4    | 0.8    |
| Spag5  | 1.6    | 2.6    | 4.2    | 0.7    | 3.9    | 0.6    | 4.7    | 1.7    | 3.8    | 2.1    | 3.3    | 2.6    |
| Spag7  | 27.1   | 25.9   | 30.1   | 33.2   | 24.1   | 26.4   | 37.8   | 35.3   | 31.0   | 28.6   | 33.9   | 31.5   |
| Spag8  | 0.1    | 0.0    | 0.0    | 0.2    | 0.0    | 0.1    | 0.1    | 0.1    | 0.1    | 0.0    | 0.2    | 0.0    |
| Spag9  | 35.6   | 31.6   | 30.8   | 33.9   | 30.6   | 34.4   | 31.5   | 32.2   | 30.9   | 28.6   | 34.3   | 32.5   |
| Sparc  | 2867.6 | 2556.9 | 2779.0 | 2529.8 | 2068.2 | 2430.0 | 2233.5 | 3049.5 | 2577.1 | 2828.8 | 2747.2 | 2734.5 |

Online Table 1

|            |       |      |      |       |       |       |      |      |       |       |       |       |
|------------|-------|------|------|-------|-------|-------|------|------|-------|-------|-------|-------|
| Sparc1     | 1.9   | 1.6  | 5.3  | 0.5   | 0.7   | 0.4   | 2.5  | 4.4  | 3.6   | 0.4   | 0.7   | 0.7   |
| Spast      | 7.6   | 8.1  | 7.8  | 7.8   | 7.1   | 8.3   | 7.1  | 7.7  | 7.3   | 7.6   | 8.5   | 8.1   |
| Spata1     | 1.3   | 1.0  | 1.4  | 1.7   | 0.9   | 1.8   | 1.4  | 0.9  | 1.3   | 1.0   | 1.8   | 1.2   |
| Spata13    | 2.0   | 1.1  | 0.9  | 2.5   | 2.4   | 1.8   | 1.7  | 1.3  | 1.3   | 1.7   | 1.8   | 1.5   |
| Spata17    | 0.2   | 0.3  | 0.1  | 0.3   | 0.0   | 0.6   | 0.2  | 0.2  | 0.1   | 0.1   | 0.1   | 0.2   |
| Spata18    | 0.0   | 0.1  | 0.0  | 0.0   | 0.0   | 0.0   | 0.0  | 0.0  | 0.0   | 0.0   | 0.0   | 0.0   |
| Spata2     | 2.4   | 2.8  | 2.7  | 1.8   | 3.0   | 2.5   | 3.0  | 3.0  | 2.9   | 2.2   | 2.8   | 2.1   |
| Spata20    | 0.0   | 0.0  | 0.0  | 0.0   | 0.0   | 0.0   | 0.0  | 0.0  | 0.0   | 0.0   | 0.0   | 0.0   |
| Spata24    | 4.2   | 3.2  | 5.1  | 2.5   | 3.1   | 4.6   | 3.9  | 4.5  | 4.2   | 2.4   | 3.3   | 2.6   |
| Spata25    | 0.1   | 0.0  | 0.0  | 0.1   | 0.1   | 0.1   | 0.1  | 0.0  | 0.0   | 0.0   | 0.1   | 0.1   |
| Spata2l    | 0.5   | 0.5  | 0.8  | 0.5   | 0.8   | 0.9   | 0.7  | 0.8  | 0.7   | 0.8   | 0.4   | 0.5   |
| Spata31d1d | 0.0   | 0.0  | 0.0  | 0.0   | 0.0   | 0.0   | 0.0  | 0.0  | 0.0   | 0.0   | 0.0   | 0.0   |
| Spata4     | 0.2   | 0.1  | 0.2  | 0.5   | 0.0   | 0.2   | 0.2  | 0.1  | 0.1   | 0.1   | 0.2   | 0.1   |
| Spata5     | 11.6  | 14.8 | 14.3 | 11.3  | 12.1  | 8.3   | 13.5 | 14.4 | 16.3  | 11.1  | 13.1  | 14.5  |
| Spata5l1   | 1.2   | 1.3  | 1.4  | 0.8   | 1.2   | 1.7   | 1.3  | 1.2  | 1.3   | 1.8   | 0.8   | 1.2   |
| Spata6     | 14.0  | 16.2 | 14.1 | 15.5  | 13.0  | 17.6  | 14.8 | 14.2 | 12.7  | 10.9  | 14.1  | 12.2  |
| Spata7     | 2.7   | 2.8  | 3.6  | 3.0   | 2.5   | 4.3   | 2.7  | 2.9  | 2.6   | 2.0   | 2.6   | 3.0   |
| Spata9     | 0.2   | 0.3  | 0.5  | 0.3   | 0.2   | 0.3   | 0.2  | 0.3  | 0.3   | 0.3   | 0.3   | 0.1   |
| Spatc1     | 0.0   | 0.1  | 0.0  | 0.0   | 0.0   | 0.0   | 0.0  | 0.0  | 0.0   | 0.0   | 0.0   | 0.0   |
| Spatc1l    | 0.0   | 0.1  | 0.0  | 0.0   | 0.0   | 0.0   | 0.0  | 0.0  | 0.0   | 0.0   | 0.0   | 0.0   |
| Spats1     | 0.4   | 0.1  | 0.4  | 0.1   | 0.2   | 0.3   | 0.1  | 0.1  | 0.1   | 0.1   | 0.2   | 0.1   |
| Spats2     | 8.6   | 9.9  | 9.7  | 8.5   | 9.4   | 8.0   | 9.1  | 9.6  | 9.6   | 9.4   | 10.5  | 10.9  |
| Spats2l    | 1.9   | 2.3  | 2.8  | 1.8   | 1.8   | 1.6   | 2.0  | 2.3  | 2.1   | 2.9   | 3.0   | 2.5   |
| Spc24      | 1.1   | 2.0  | 3.4  | 0.5   | 3.1   | 0.5   | 4.5  | 2.1  | 3.9   | 1.3   | 2.4   | 2.2   |
| Spc25      | 7.8   | 11.8 | 16.8 | 6.8   | 16.2  | 5.9   | 15.7 | 5.9  | 12.2  | 9.4   | 12.2  | 8.8   |
| Spcs1      | 110.1 | 94.2 | 85.1 | 125.8 | 104.1 | 119.8 | 96.6 | 98.9 | 106.3 | 125.1 | 103.6 | 113.0 |
| Spcs2      | 26.7  | 25.5 | 23.6 | 30.6  | 26.1  | 26.1  | 24.4 | 27.6 | 27.8  | 29.8  | 29.3  | 29.5  |
| Spcs3      | 27.8  | 23.1 | 25.4 | 24.8  | 26.0  | 22.1  | 23.4 | 24.0 | 26.1  | 23.5  | 25.0  | 29.6  |
| Spdef      | 0.0   | 0.0  | 0.0  | 0.0   | 0.0   | 0.0   | 0.0  | 0.0  | 0.0   | 0.0   | 0.0   | 0.0   |
| Spdl1      | 1.4   | 2.1  | 3.6  | 1.7   | 3.3   | 1.1   | 4.0  | 2.0  | 3.2   | 1.5   | 2.4   | 2.3   |
| Spdya      | 0.1   | 0.1  | 0.2  | 0.0   | 0.1   | 0.1   | 0.2  | 0.1  | 0.1   | 0.1   | 0.1   | 0.0   |
| Specc1     | 7.7   | 11.8 | 13.1 | 7.8   | 12.8  | 5.2   | 10.9 | 11.9 | 17.4  | 9.8   | 9.1   | 17.7  |
| Specc1l    | 21.4  | 22.3 | 24.2 | 21.4  | 21.0  | 22.1  | 25.9 | 24.0 | 23.9  | 18.8  | 23.7  | 25.0  |
| Speer1-ps1 | 0.1   | 0.0  | 0.0  | 0.1   | 0.2   | 0.0   | 0.1  | 0.2  | 0.0   | 0.0   | 0.0   | 0.0   |
| Speer3     | 1.4   | 0.9  | 0.6  | 0.8   | 0.3   | 0.3   | 0.7  | 0.5  | 0.4   | 1.0   | 1.1   | 0.6   |
| Speer4a    | 0.3   | 0.1  | 0.2  | 0.0   | 0.1   | 0.1   | 0.0  | 0.1  | 0.0   | 0.1   | 0.2   | 0.1   |
| Speer4b    | 0.2   | 0.1  | 0.4  | 0.0   | 0.2   | 0.1   | 0.0  | 0.1  | 0.2   | 0.2   | 0.3   | 0.2   |
| Speer4f    | 0.0   | 0.0  | 0.0  | 0.0   | 0.0   | 0.0   | 0.0  | 0.0  | 0.0   | 0.0   | 0.0   | 0.0   |
| Speer7-ps1 | 0.2   | 0.5  | 0.5  | 0.0   | 0.0   | 0.1   | 0.1  | 0.2  | 0.0   | 0.2   | 0.1   | 0.0   |
| Speer8-ps1 | 0.0   | 0.0  | 0.1  | 0.0   | 0.0   | 0.1   | 0.0  | 0.0  | 0.0   | 0.0   | 0.1   | 0.1   |
| Spf1       | 1.4   | 1.2  | 1.0  | 1.0   | 1.3   | 2.1   | 1.1  | 1.2  | 1.4   | 1.3   | 1.3   | 0.9   |
| Spf2       | 0.0   | 0.0  | 0.0  | 0.1   | 0.0   | 0.0   | 0.0  | 0.0  | 0.0   | 0.1   | 0.0   | 0.0   |
| Speg       | 3.0   | 2.5  | 2.6  | 7.0   | 8.4   | 2.6   | 3.1  | 2.9  | 3.7   | 6.2   | 4.3   | 4.3   |
| Spfen      | 1.0   | 1.6  | 1.9  | 1.2   | 1.6   | 1.2   | 2.0  | 1.4  | 1.6   | 1.3   | 1.3   | 1.3   |
| Spg11      | 10.5  | 9.7  | 8.8  | 10.7  | 9.3   | 11.8  | 7.5  | 9.2  | 8.0   | 8.5   | 9.2   | 8.9   |
| Spg20      | 36.1  | 33.7 | 29.6 | 46.5  | 27.9  | 40.5  | 35.0 | 29.3 | 32.2  | 28.6  | 34.6  | 35.9  |
| Spg21      | 29.4  | 20.3 | 18.5 | 29.3  | 21.6  | 29.7  | 21.4 | 21.4 | 20.7  | 24.2  | 22.7  | 23.2  |
| Spg7       | 24.8  | 19.5 | 17.6 | 27.7  | 21.6  | 24.3  | 21.6 | 20.8 | 20.6  | 22.9  | 22.7  | 21.8  |
| Sphk1      | 7.0   | 7.4  | 6.7  | 7.9   | 11.0  | 7.7   | 10.6 | 7.9  | 7.7   | 9.0   | 6.1   | 8.4   |
| Sphk2      | 7.4   | 8.5  | 9.3  | 8.2   | 6.7   | 9.3   | 7.3  | 8.1  | 7.2   | 6.8   | 6.7   | 6.9   |
| Sphkap     | 0.0   | 0.0  | 0.1  | 0.0   | 0.0   | 0.0   | 0.0  | 0.0  | 0.0   | 0.0   | 0.0   | 0.0   |
| Spib       | 0.0   | 0.0  | 0.1  | 0.0   | 0.1   | 0.0   | 0.1  | 0.0  | 0.0   | 0.0   | 0.0   | 0.0   |
| Spic       | 0.0   | 0.0  | 0.0  | 0.0   | 0.0   | 0.0   | 0.0  | 0.0  | 0.0   | 0.0   | 0.0   | 0.0   |
| Spice1     | 1.6   | 2.3  | 2.1  | 1.5   | 1.7   | 2.2   | 1.8  | 2.2  | 1.9   | 1.9   | 2.6   | 1.6   |
| Spin1      | 28.2  | 25.3 | 28.2 | 21.9  | 25.5  | 23.4  | 27.8 | 28.9 | 28.2  | 30.8  | 29.3  | 32.7  |
| Spin2      | 1.2   | 1.2  | 2.0  | 1.2   | 1.0   | 1.4   | 1.4  | 1.2  | 0.9   | 1.1   | 1.6   | 1.3   |
| Spin4      | 0.5   | 0.7  | 1.0  | 0.4   | 0.6   | 0.6   | 0.8  | 0.9  | 0.8   | 0.9   | 0.7   | 1.1   |

Online Table 1

|         |       |       |       |       |       |       |       |       |       |       |       |       |
|---------|-------|-------|-------|-------|-------|-------|-------|-------|-------|-------|-------|-------|
| Spink10 | 0.3   | 0.3   | 0.6   | 0.1   | 0.3   | 0.4   | 0.2   | 0.1   | 0.1   | 0.2   | 0.3   | 0.2   |
| Spink2  | 0.1   | 0.3   | 0.5   | 0.0   | 0.1   | 0.0   | 0.2   | 0.1   | 0.0   | 0.0   | 0.0   | 0.5   |
| Spink5  | 0.0   | 0.0   | 0.0   | 0.1   | 0.0   | 0.0   | 0.0   | 0.0   | 0.0   | 0.0   | 0.0   | 0.0   |
| Spink8  | 0.1   | 0.1   | 0.1   | 0.0   | 0.0   | 0.0   | 0.0   | 0.0   | 0.1   | 0.0   | 0.3   | 0.0   |
| Spint1  | 0.2   | 0.1   | 0.1   | 0.3   | 0.5   | 0.1   | 0.1   | 0.1   | 0.1   | 0.4   | 0.1   | 0.1   |
| Spint2  | 1.0   | 0.4   | 0.2   | 0.5   | 0.2   | 1.1   | 0.3   | 0.5   | 0.5   | 1.4   | 1.5   | 0.5   |
| Spint4  | 0.0   | 0.0   | 0.0   | 0.3   | 0.0   | 0.0   | 0.2   | 0.1   | 0.0   | 0.0   | 0.0   | 0.0   |
| Spire1  | 7.7   | 5.3   | 3.3   | 7.3   | 4.6   | 8.1   | 4.4   | 3.0   | 3.0   | 5.1   | 5.5   | 4.3   |
| Spire2  | 1.0   | 0.6   | 0.6   | 1.3   | 0.8   | 0.7   | 1.4   | 2.3   | 2.2   | 2.1   | 1.5   | 1.3   |
| Spn     | 1.5   | 0.2   | 0.4   | 8.4   | 28.4  | 0.1   | 5.6   | 0.3   | 1.3   | 2.9   | 1.2   | 3.5   |
| Spns1   | 11.7  | 11.0  | 9.4   | 11.6  | 11.8  | 12.0  | 10.1  | 10.1  | 10.9  | 11.1  | 8.1   | 9.3   |
| Spns2   | 1.7   | 3.3   | 3.8   | 2.5   | 2.3   | 3.0   | 1.4   | 1.5   | 1.6   | 0.7   | 0.5   | 0.8   |
| Spns3   | 0.3   | 0.2   | 0.2   | 0.5   | 0.4   | 0.6   | 0.2   | 0.4   | 0.3   | 0.0   | 0.1   | 0.2   |
| Spock2  | 0.1   | 0.1   | 0.1   | 0.1   | 0.1   | 0.1   | 0.0   | 0.1   | 0.1   | 0.2   | 0.1   | 0.1   |
| Spock3  | 0.0   | 0.0   | 0.0   | 0.0   | 0.0   | 0.0   | 0.0   | 0.0   | 0.0   | 0.0   | 0.0   | 0.0   |
| Spon1   | 0.5   | 0.7   | 2.0   | 0.5   | 0.5   | 0.2   | 0.8   | 1.6   | 0.4   | 0.5   | 0.4   | 0.7   |
| Spon2   | 8.0   | 6.2   | 4.3   | 6.4   | 5.5   | 4.5   | 6.0   | 4.5   | 4.6   | 3.7   | 4.5   | 2.1   |
| Spop    | 24.7  | 23.6  | 22.8  | 27.3  | 25.4  | 25.2  | 23.0  | 21.2  | 19.1  | 21.8  | 22.1  | 22.1  |
| Spopl   | 7.3   | 6.5   | 6.2   | 7.1   | 6.4   | 7.9   | 6.1   | 5.5   | 6.1   | 6.1   | 6.6   | 5.9   |
| Spp1    | 71.0  | 1.2   | 3.7   | 445.6 | 485.5 | 1.0   | 35.5  | 12.0  | 9.9   | 50.8  | 23.0  | 47.4  |
| Sppl2a  | 16.8  | 16.2  | 16.7  | 22.6  | 22.2  | 21.6  | 18.3  | 16.1  | 16.7  | 17.1  | 19.7  | 18.1  |
| Sppl2b  | 4.1   | 4.0   | 3.6   | 4.3   | 4.7   | 3.7   | 5.1   | 5.3   | 4.7   | 4.7   | 4.4   | 3.2   |
| Sppl3   | 9.5   | 10.2  | 9.3   | 9.5   | 10.7  | 10.8  | 11.3  | 10.7  | 12.6  | 11.0  | 10.4  | 10.0  |
| Spr     | 21.0  | 16.4  | 13.1  | 20.9  | 19.9  | 20.9  | 16.8  | 13.4  | 16.8  | 19.9  | 16.2  | 15.4  |
| Spred1  | 18.3  | 21.5  | 20.4  | 20.1  | 24.7  | 20.7  | 21.7  | 16.7  | 23.2  | 27.3  | 22.1  | 22.9  |
| Spred2  | 2.1   | 2.7   | 2.3   | 2.9   | 2.7   | 2.9   | 2.2   | 1.8   | 1.6   | 2.4   | 2.3   | 1.8   |
| Spred3  | 2.1   | 2.1   | 1.7   | 2.4   | 2.3   | 2.1   | 1.8   | 1.3   | 1.4   | 1.8   | 1.4   | 1.4   |
| Sprn    | 0.1   | 0.3   | 0.6   | 0.0   | 0.0   | 0.1   | 0.1   | 0.2   | 0.1   | 0.1   | 0.1   | 0.2   |
| Sprr1a  | 0.2   | 0.1   | 0.5   | 0.3   | 0.4   | 0.2   | 0.4   | 0.7   | 0.3   | 0.4   | 0.2   | 0.1   |
| Sprr2a1 | 0.0   | 0.0   | 0.0   | 0.0   | 0.0   | 0.0   | 0.0   | 0.0   | 0.0   | 0.0   | 0.0   | 0.0   |
| Sprr2a2 | 0.0   | 0.0   | 0.0   | 0.0   | 0.0   | 0.0   | 0.0   | 0.0   | 0.0   | 0.0   | 0.0   | 0.0   |
| Sprr3   | 0.7   | 0.2   | 0.1   | 0.9   | 0.4   | 0.2   | 0.7   | 0.0   | 0.5   | 0.6   | 0.4   | 0.3   |
| Sprtn   | 7.6   | 7.7   | 7.6   | 7.5   | 6.7   | 6.7   | 8.1   | 6.8   | 7.1   | 6.9   | 8.4   | 7.7   |
| Spry1   | 15.2  | 25.2  | 30.1  | 19.2  | 21.5  | 15.6  | 26.7  | 32.7  | 39.6  | 20.9  | 22.7  | 26.6  |
| Spry2   | 12.8  | 14.6  | 17.9  | 11.4  | 12.8  | 8.1   | 15.0  | 12.2  | 14.5  | 17.5  | 14.7  | 17.6  |
| Spry4   | 1.9   | 2.2   | 2.2   | 1.7   | 2.3   | 1.8   | 2.0   | 1.5   | 1.6   | 3.3   | 1.8   | 1.6   |
| Spryd3  | 13.7  | 13.2  | 10.6  | 13.8  | 13.7  | 14.1  | 13.1  | 13.7  | 14.0  | 13.3  | 14.3  | 14.7  |
| Spryd4  | 5.5   | 5.7   | 3.8   | 5.1   | 5.2   | 6.1   | 5.2   | 4.5   | 5.5   | 5.0   | 5.9   | 5.6   |
| Spryd7  | 12.8  | 11.0  | 11.2  | 11.3  | 11.9  | 10.8  | 12.6  | 12.8  | 10.8  | 11.3  | 12.2  | 14.0  |
| Spsb1   | 7.7   | 9.6   | 12.3  | 6.6   | 10.3  | 5.6   | 9.7   | 12.0  | 8.9   | 14.6  | 10.9  | 11.6  |
| Spsb2   | 6.7   | 6.4   | 6.2   | 5.4   | 6.6   | 6.2   | 6.1   | 5.7   | 6.7   | 9.1   | 5.6   | 6.8   |
| Spsb3   | 12.0  | 12.5  | 11.5  | 12.1  | 11.8  | 13.5  | 13.4  | 12.4  | 13.5  | 12.3  | 11.8  | 11.9  |
| Spsb4   | 0.2   | 0.2   | 0.1   | 0.1   | 0.3   | 0.1   | 0.5   | 0.1   | 0.3   | 0.3   | 0.2   | 0.0   |
| Spta1   | 8.1   | 6.7   | 6.2   | 8.5   | 6.8   | 8.7   | 6.5   | 8.8   | 4.7   | 2.8   | 5.1   | 3.3   |
| Sptan1  | 170.8 | 144.2 | 122.2 | 153.5 | 131.3 | 146.7 | 155.9 | 172.8 | 147.1 | 134.2 | 174.5 | 145.9 |
| Sptb    | 0.2   | 0.2   | 0.1   | 0.1   | 0.1   | 0.1   | 0.1   | 0.1   | 0.1   | 0.2   | 0.2   | 0.1   |
| Sptbn1  | 341.6 | 269.8 | 256.3 | 324.5 | 249.1 | 319.0 | 287.8 | 269.2 | 247.5 | 217.9 | 296.6 | 274.6 |
| Sptbn2  | 0.6   | 0.5   | 0.5   | 1.2   | 0.9   | 0.8   | 1.2   | 0.7   | 0.7   | 0.5   | 0.5   | 0.4   |
| Sptbn4  | 0.0   | 0.1   | 0.0   | 0.0   | 0.1   | 0.0   | 0.0   | 0.0   | 0.0   | 0.1   | 0.1   | 0.0   |
| Sptlc1  | 19.3  | 15.1  | 14.0  | 20.0  | 17.5  | 15.9  | 17.7  | 16.3  | 17.8  | 18.7  | 18.9  | 16.9  |
| Sptlc2  | 23.1  | 26.0  | 23.4  | 23.1  | 26.6  | 17.6  | 25.5  | 28.5  | 27.4  | 31.2  | 29.3  | 26.0  |
| Sptssa  | 15.6  | 15.1  | 15.8  | 17.8  | 18.1  | 18.0  | 15.1  | 15.9  | 16.7  | 16.3  | 16.6  | 17.6  |
| Spty2d1 | 8.0   | 7.9   | 8.1   | 8.2   | 8.0   | 7.2   | 8.1   | 7.8   | 7.1   | 7.7   | 8.0   | 8.1   |
| Sqle    | 16.9  | 18.9  | 19.0  | 6.8   | 14.7  | 9.5   | 35.7  | 40.1  | 34.1  | 15.8  | 36.4  | 16.4  |
| Sqrdl   | 45.9  | 36.2  | 28.2  | 46.1  | 35.1  | 45.8  | 30.3  | 28.2  | 23.4  | 27.1  | 26.9  | 27.1  |
| Sqstm1  | 546.4 | 377.7 | 243.2 | 809.2 | 455.8 | 786.9 | 326.3 | 263.0 | 258.9 | 365.3 | 339.9 | 333.0 |
| Sra1    | 79.4  | 82.3  | 74.9  | 65.2  | 63.5  | 68.6  | 64.2  | 77.0  | 68.2  | 74.6  | 73.0  | 78.6  |

Online Table 1

|          |       |       |       |       |       |       |       |       |       |       |       |       |
|----------|-------|-------|-------|-------|-------|-------|-------|-------|-------|-------|-------|-------|
| Srbd1    | 5.2   | 5.3   | 6.3   | 5.6   | 5.5   | 5.4   | 5.0   | 5.9   | 5.0   | 5.6   | 5.8   | 6.2   |
| Src      | 10.8  | 12.1  | 13.2  | 9.2   | 10.6  | 11.3  | 12.4  | 12.0  | 12.6  | 12.1  | 12.0  | 10.9  |
| Srcin1   | 0.0   | 0.0   | 0.0   | 0.0   | 0.0   | 0.0   | 0.0   | 0.0   | 0.0   | 0.0   | 0.0   | 0.0   |
| Srcrb4d  | 0.4   | 0.4   | 0.3   | 0.4   | 0.4   | 0.4   | 0.3   | 0.5   | 0.3   | 0.3   | 0.5   | 0.4   |
| Srd5a1   | 0.7   | 0.6   | 0.6   | 0.6   | 0.7   | 0.8   | 0.6   | 0.6   | 0.6   | 0.7   | 0.6   | 0.5   |
| Srd5a3   | 12.6  | 11.1  | 8.8   | 13.2  | 10.5  | 13.8  | 8.6   | 9.3   | 9.8   | 10.3  | 8.1   | 10.2  |
| Srebf1   | 12.1  | 16.3  | 15.0  | 11.1  | 13.6  | 15.4  | 19.3  | 19.4  | 21.3  | 12.8  | 13.4  | 11.7  |
| Srebf2   | 7.8   | 10.5  | 12.3  | 5.6   | 10.4  | 6.9   | 17.0  | 19.3  | 17.0  | 9.2   | 12.9  | 8.6   |
| Srek1    | 8.8   | 11.0  | 12.5  | 9.8   | 9.1   | 8.6   | 10.1  | 10.9  | 7.9   | 8.6   | 12.0  | 11.2  |
| Srek1ip1 | 6.0   | 6.7   | 8.4   | 7.6   | 6.4   | 7.2   | 6.7   | 8.1   | 7.3   | 8.9   | 9.6   | 10.1  |
| Srf      | 8.0   | 7.5   | 7.0   | 8.4   | 8.0   | 5.4   | 10.3  | 6.8   | 9.4   | 8.5   | 9.4   | 7.5   |
| Srfbp1   | 11.2  | 11.4  | 9.4   | 12.0  | 8.9   | 9.6   | 8.9   | 9.6   | 8.9   | 9.4   | 11.0  | 11.4  |
| Srgap1   | 0.5   | 0.6   | 0.7   | 0.3   | 0.5   | 0.4   | 0.5   | 0.7   | 0.5   | 0.7   | 0.6   | 0.5   |
| Srgap2   | 7.2   | 9.4   | 8.9   | 5.7   | 7.1   | 6.0   | 7.5   | 9.6   | 9.0   | 7.7   | 9.0   | 7.5   |
| Srgap3   | 4.8   | 6.2   | 4.7   | 6.4   | 5.1   | 9.0   | 4.1   | 2.9   | 2.3   | 3.5   | 3.9   | 3.2   |
| Srgn     | 1.4   | 0.8   | 1.4   | 7.6   | 18.8  | 0.3   | 2.0   | 0.6   | 0.6   | 1.7   | 0.6   | 1.2   |
| Sri      | 33.9  | 33.7  | 36.8  | 42.0  | 35.6  | 36.5  | 38.8  | 36.6  | 35.7  | 32.3  | 37.6  | 38.4  |
| Srl      | 0.4   | 0.5   | 0.5   | 0.3   | 0.4   | 0.4   | 0.2   | 0.5   | 0.4   | 0.3   | 0.3   | 0.2   |
| Srm      | 32.7  | 28.9  | 24.8  | 31.3  | 27.3  | 28.2  | 32.3  | 31.9  | 28.1  | 30.9  | 33.6  | 24.1  |
| Srms     | 0.0   | 0.0   | 0.0   | 0.0   | 0.0   | 0.0   | 0.0   | 0.0   | 0.0   | 0.0   | 0.0   | 0.0   |
| Srp14    | 196.0 | 153.2 | 138.6 | 223.0 | 159.2 | 206.9 | 144.3 | 145.4 | 138.3 | 170.7 | 173.0 | 175.3 |
| Srp19    | 60.9  | 51.0  | 62.5  | 72.0  | 56.7  | 57.5  | 64.3  | 60.4  | 48.2  | 56.1  | 65.0  | 70.5  |
| Srp54a   | 43.2  | 40.1  | 44.8  | 46.1  | 41.7  | 43.7  | 50.0  | 43.7  | 45.1  | 42.3  | 51.7  | 58.0  |
| Srp54b   | 30.3  | 24.9  | 29.3  | 29.0  | 28.5  | 28.8  | 30.7  | 27.0  | 30.5  | 28.6  | 31.1  | 35.3  |
| Srp54c   | 45.1  | 44.2  | 51.6  | 50.5  | 49.9  | 41.9  | 64.8  | 50.6  | 48.0  | 42.6  | 62.0  | 61.7  |
| Srp68    | 17.7  | 20.4  | 21.2  | 19.4  | 17.4  | 19.5  | 18.1  | 21.4  | 17.4  | 19.6  | 19.2  | 20.0  |
| Srp72    | 41.2  | 37.4  | 36.4  | 38.0  | 37.4  | 37.4  | 33.6  | 38.2  | 32.1  | 41.0  | 42.1  | 38.1  |
| Srp9     | 76.7  | 54.5  | 48.2  | 69.4  | 56.1  | 61.7  | 53.8  | 51.5  | 51.0  | 61.8  | 62.7  | 60.0  |
| Srpk1    | 21.3  | 20.8  | 20.6  | 20.2  | 19.1  | 21.6  | 23.0  | 21.8  | 19.1  | 20.3  | 24.0  | 21.2  |
| Srpk2    | 11.3  | 10.4  | 11.0  | 12.4  | 9.6   | 11.9  | 10.2  | 8.9   | 8.3   | 10.3  | 10.6  | 11.6  |
| Srpk3    | 0.0   | 0.0   | 0.0   | 0.1   | 0.5   | 0.1   | 0.1   | 0.0   | 0.1   | 0.0   | 0.0   | 0.0   |
| Srpr     | 51.5  | 46.1  | 43.4  | 55.9  | 46.3  | 46.8  | 49.2  | 47.3  | 46.0  | 47.7  | 49.7  | 49.3  |
| Srprb    | 22.6  | 19.8  | 17.3  | 27.4  | 18.6  | 20.3  | 23.9  | 22.6  | 20.8  | 20.7  | 23.2  | 21.6  |
| Srpx     | 0.7   | 2.8   | 4.9   | 0.6   | 1.1   | 0.4   | 1.2   | 2.9   | 3.8   | 11.3  | 7.3   | 4.1   |
| Srpx2    | 39.2  | 49.8  | 60.8  | 76.7  | 66.4  | 53.1  | 75.7  | 75.6  | 73.0  | 34.1  | 39.8  | 50.3  |
| Srr      | 12.8  | 11.2  | 11.2  | 12.9  | 9.7   | 13.0  | 9.8   | 10.0  | 9.3   | 9.1   | 10.3  | 10.2  |
| Srrd     | 6.1   | 5.3   | 4.1   | 4.2   | 5.5   | 6.2   | 4.6   | 5.3   | 5.4   | 6.1   | 5.2   | 5.0   |
| Srrm1    | 5.1   | 5.7   | 7.0   | 6.7   | 5.9   | 6.7   | 8.1   | 6.5   | 5.5   | 5.4   | 6.1   | 6.0   |
| Srrm2    | 12.6  | 16.3  | 18.7  | 11.8  | 14.3  | 12.4  | 18.2  | 16.5  | 15.5  | 14.4  | 13.8  | 13.2  |
| Srrm3    | 0.0   | 0.1   | 0.2   | 0.0   | 0.0   | 0.0   | 0.0   | 0.2   | 0.1   | 0.1   | 0.1   | 0.2   |
| Srrm4    | 0.0   | 0.0   | 0.1   | 0.1   | 0.1   | 0.1   | 0.0   | 0.0   | 0.0   | 0.1   | 0.1   | 0.1   |
| Srrt     | 21.9  | 21.2  | 23.9  | 24.4  | 22.0  | 19.6  | 27.6  | 24.7  | 21.9  | 24.0  | 25.1  | 24.5  |
| Srsf1    | 18.7  | 16.6  | 21.5  | 19.7  | 18.7  | 16.8  | 20.8  | 19.3  | 19.2  | 19.7  | 22.5  | 22.3  |
| Srsf10   | 21.2  | 23.2  | 26.7  | 25.0  | 23.4  | 23.3  | 23.3  | 23.6  | 23.6  | 25.3  | 30.0  | 28.6  |
| Srsf11   | 18.8  | 18.5  | 23.3  | 20.3  | 17.2  | 18.6  | 21.3  | 18.6  | 16.1  | 17.1  | 20.9  | 21.8  |
| Srsf12   | 0.2   | 0.2   | 0.2   | 0.1   | 0.1   | 0.1   | 0.0   | 0.0   | 0.1   | 0.1   | 0.0   | 0.1   |
| Srsf2    | 32.0  | 29.7  | 31.2  | 33.1  | 33.2  | 28.2  | 40.2  | 33.5  | 37.7  | 30.9  | 34.6  | 31.5  |
| Srsf3    | 28.6  | 27.2  | 28.5  | 27.5  | 28.9  | 27.3  | 32.4  | 27.8  | 31.4  | 32.5  | 34.1  | 32.3  |
| Srsf4    | 7.7   | 9.1   | 11.7  | 8.2   | 8.3   | 8.3   | 9.2   | 10.2  | 8.6   | 8.3   | 9.9   | 8.5   |
| Srsf5    | 114.9 | 110.6 | 129.8 | 123.6 | 102.1 | 102.7 | 123.3 | 122.1 | 124.7 | 124.9 | 121.5 | 142.1 |
| Srsf6    | 26.6  | 25.7  | 24.3  | 24.6  | 25.4  | 23.9  | 27.2  | 28.1  | 28.1  | 30.4  | 30.2  | 28.9  |
| Srsf7    | 13.1  | 14.0  | 15.5  | 15.2  | 15.7  | 15.5  | 16.1  | 15.5  | 16.0  | 18.3  | 17.6  | 14.7  |
| Srsf9    | 28.0  | 23.1  | 25.7  | 24.0  | 26.9  | 24.5  | 26.7  | 24.9  | 24.6  | 30.7  | 26.7  | 29.5  |
| Srxn1    | 80.0  | 45.5  | 28.2  | 136.8 | 83.7  | 101.1 | 35.8  | 30.6  | 22.4  | 34.8  | 33.0  | 27.5  |
| Ss18     | 26.2  | 27.2  | 29.1  | 30.9  | 32.0  | 25.2  | 37.1  | 27.8  | 33.0  | 30.6  | 37.4  | 31.2  |
| Ss18l1   | 1.5   | 1.7   | 1.8   | 1.6   | 1.7   | 1.7   | 1.5   | 1.4   | 1.7   | 1.4   | 1.9   | 1.6   |
| Ssb      | 75.5  | 69.5  | 76.0  | 80.4  | 65.8  | 70.1  | 71.2  | 67.0  | 59.8  | 76.3  | 85.7  | 86.0  |

Online Table 1

|            |       |       |       |       |       |       |       |       |       |       |       |       |
|------------|-------|-------|-------|-------|-------|-------|-------|-------|-------|-------|-------|-------|
| Ssbp1      | 18.9  | 16.1  | 21.1  | 21.1  | 15.6  | 19.3  | 19.1  | 17.2  | 14.9  | 16.7  | 22.4  | 21.0  |
| Ssbp2      | 4.0   | 4.0   | 5.5   | 3.7   | 4.2   | 2.9   | 4.1   | 4.6   | 4.0   | 3.8   | 4.7   | 4.9   |
| Ssbp3      | 8.2   | 7.7   | 8.6   | 7.3   | 6.8   | 7.9   | 6.8   | 9.1   | 7.9   | 13.1  | 11.3  | 8.8   |
| Ssbp4      | 7.6   | 8.2   | 8.3   | 8.0   | 9.1   | 7.0   | 7.8   | 11.0  | 8.7   | 9.6   | 7.2   | 7.4   |
| Ssc5d      | 1.2   | 1.5   | 2.2   | 1.2   | 1.1   | 1.4   | 1.2   | 1.8   | 1.2   | 1.4   | 1.0   | 0.9   |
| Ssfa2      | 26.7  | 33.3  | 33.9  | 34.9  | 26.4  | 32.6  | 22.7  | 23.9  | 22.4  | 21.1  | 21.4  | 23.6  |
| Ssh1       | 3.6   | 4.5   | 3.7   | 4.0   | 4.2   | 4.2   | 5.4   | 4.8   | 5.1   | 4.3   | 4.0   | 4.0   |
| Ssh2       | 1.6   | 3.0   | 4.4   | 2.5   | 3.7   | 2.0   | 2.0   | 3.6   | 2.5   | 2.4   | 1.9   | 2.5   |
| Ssh3       | 9.7   | 10.0  | 10.4  | 7.9   | 8.1   | 8.4   | 6.9   | 7.3   | 7.2   | 9.9   | 8.6   | 9.6   |
| Ssna1      | 32.6  | 25.7  | 20.9  | 28.4  | 27.8  | 24.6  | 23.3  | 22.8  | 27.8  | 28.0  | 27.5  | 24.0  |
| Sspn       | 13.2  | 14.5  | 16.5  | 14.0  | 9.9   | 17.2  | 12.7  | 12.4  | 12.4  | 12.6  | 13.5  | 14.4  |
| Sspo       | 0.0   | 0.0   | 0.0   | 0.0   | 0.0   | 0.0   | 0.0   | 0.0   | 0.0   | 0.0   | 0.0   | 0.0   |
| Ssr1       | 27.4  | 25.3  | 27.2  | 35.3  | 27.8  | 29.6  | 30.2  | 28.1  | 26.0  | 28.6  | 31.7  | 33.7  |
| Ssr2       | 67.7  | 59.7  | 61.6  | 65.5  | 62.1  | 63.6  | 61.5  | 75.9  | 67.5  | 67.4  | 69.2  | 63.4  |
| Ssr3       | 177.9 | 169.7 | 172.5 | 195.1 | 179.2 | 174.6 | 187.9 | 192.2 | 196.3 | 208.5 | 220.0 | 222.4 |
| Ssr4       | 160.7 | 128.9 | 117.6 | 152.4 | 128.6 | 128.6 | 123.4 | 137.1 | 123.4 | 129.9 | 134.9 | 131.4 |
| Ssrp1      | 40.7  | 38.7  | 45.8  | 40.3  | 36.3  | 39.8  | 41.8  | 39.1  | 33.4  | 35.4  | 42.2  | 41.0  |
| Sssca1     | 16.8  | 12.8  | 13.7  | 16.5  | 13.4  | 15.3  | 12.3  | 12.7  | 12.2  | 13.7  | 14.7  | 13.4  |
| Sstr2      | 0.0   | 0.0   | 0.0   | 0.0   | 0.1   | 0.1   | 0.1   | 0.1   | 0.0   | 0.3   | 0.0   | 0.0   |
| Sstr3      | 0.0   | 0.0   | 0.1   | 0.0   | 0.0   | 0.0   | 0.1   | 0.0   | 0.0   | 0.0   | 0.0   | 0.0   |
| Sstr5      | 0.0   | 0.0   | 0.0   | 0.1   | 0.1   | 0.1   | 0.0   | 0.0   | 0.0   | 0.0   | 0.0   | 0.0   |
| Ssu72      | 37.2  | 36.4  | 36.8  | 37.5  | 36.3  | 38.0  | 38.6  | 37.0  | 33.5  | 34.4  | 39.2  | 39.8  |
| Ssx2ip     | 4.4   | 4.2   | 4.7   | 3.0   | 3.6   | 4.0   | 3.7   | 3.5   | 3.3   | 5.8   | 4.8   | 3.6   |
| Ssxb1      | 0.0   | 0.0   | 0.0   | 0.0   | 0.0   | 0.0   | 0.0   | 0.0   | 0.0   | 0.0   | 0.0   | 0.0   |
| Ssxb10     | 0.0   | 0.0   | 0.1   | 0.0   | 0.1   | 0.0   | 0.1   | 0.0   | 0.0   | 0.0   | 0.0   | 0.0   |
| Ssxb2      | 0.0   | 0.0   | 0.1   | 0.0   | 0.0   | 0.0   | 0.0   | 0.0   | 0.0   | 0.0   | 0.0   | 0.0   |
| Ssxb3      | 0.0   | 0.0   | 0.1   | 0.0   | 0.0   | 0.0   | 0.0   | 0.0   | 0.0   | 0.0   | 0.0   | 0.0   |
| Ssxb5      | 0.1   | 0.0   | 0.1   | 0.0   | 0.1   | 0.0   | 0.1   | 0.0   | 0.0   | 0.0   | 0.0   | 0.0   |
| Ssxb8      | 0.0   | 0.3   | 0.1   | 0.0   | 0.0   | 0.0   | 0.0   | 0.0   | 0.0   | 0.0   | 0.0   | 0.0   |
| Ssxb9      | 0.0   | 0.0   | 0.0   | 0.0   | 0.0   | 0.0   | 0.0   | 0.0   | 0.0   | 0.0   | 0.0   | 0.0   |
| St13       | 172.7 | 152.5 | 166.7 | 201.0 | 135.0 | 179.5 | 145.0 | 122.7 | 116.6 | 161.1 | 180.1 | 195.4 |
| St14       | 0.8   | 0.6   | 0.5   | 0.6   | 0.7   | 0.7   | 0.4   | 0.2   | 0.1   | 0.3   | 0.2   | 0.3   |
| St18       | 0.1   | 0.0   | 0.0   | 0.3   | 0.7   | 0.0   | 0.1   | 0.0   | 0.0   | 0.0   | 0.0   | 0.0   |
| St3gal1    | 4.9   | 7.9   | 9.9   | 3.8   | 7.4   | 3.1   | 8.2   | 14.3  | 11.5  | 10.4  | 7.5   | 7.4   |
| St3gal2    | 9.2   | 9.7   | 7.8   | 9.5   | 9.4   | 9.9   | 10.6  | 8.7   | 9.2   | 9.2   | 9.1   | 9.0   |
| St3gal3    | 20.3  | 18.3  | 13.9  | 19.9  | 17.1  | 19.4  | 22.9  | 16.2  | 19.9  | 17.1  | 22.0  | 17.8  |
| St3gal4    | 8.6   | 9.2   | 11.1  | 5.4   | 10.2  | 7.6   | 12.0  | 21.6  | 10.9  | 10.1  | 10.4  | 9.6   |
| St3gal5    | 10.1  | 7.5   | 7.7   | 17.0  | 15.6  | 10.2  | 12.4  | 9.6   | 11.4  | 13.6  | 13.7  | 16.2  |
| St3gal6    | 3.0   | 3.1   | 2.4   | 2.9   | 5.1   | 2.0   | 1.6   | 2.0   | 1.7   | 3.5   | 2.3   | 2.0   |
| St5        | 20.5  | 22.3  | 20.0  | 19.1  | 21.4  | 13.4  | 26.4  | 21.8  | 27.1  | 21.8  | 21.1  | 24.6  |
| St6gal1    | 0.5   | 0.2   | 0.5   | 0.7   | 1.5   | 0.3   | 0.6   | 0.9   | 1.2   | 0.6   | 0.5   | 1.1   |
| St6galnac1 | 0.0   | 0.1   | 0.1   | 0.0   | 0.0   | 0.0   | 0.0   | 0.0   | 0.0   | 0.0   | 0.1   | 0.0   |
| St6galnac2 | 0.3   | 0.7   | 1.8   | 0.3   | 0.7   | 0.3   | 0.8   | 0.8   | 0.7   | 0.4   | 0.7   | 0.6   |
| St6galnac3 | 0.1   | 0.0   | 0.0   | 0.0   | 0.0   | 0.0   | 0.0   | 0.0   | 0.0   | 0.0   | 0.0   | 0.0   |
| St6galnac4 | 5.2   | 4.9   | 4.6   | 6.5   | 5.8   | 6.1   | 6.7   | 4.7   | 6.6   | 5.9   | 5.6   | 5.4   |
| St6galnac5 | 0.0   | 0.0   | 0.0   | 0.0   | 0.0   | 0.0   | 0.0   | 0.0   | 0.0   | 0.0   | 0.0   | 0.0   |
| St6galnac6 | 21.0  | 23.7  | 19.8  | 19.3  | 20.1  | 24.3  | 23.5  | 19.3  | 25.1  | 18.4  | 19.7  | 18.8  |
| St7        | 9.6   | 7.1   | 6.3   | 7.5   | 6.3   | 7.4   | 8.5   | 7.5   | 6.7   | 6.4   | 7.7   | 7.1   |
| St7l       | 3.3   | 3.6   | 3.1   | 3.5   | 3.6   | 3.5   | 3.2   | 3.1   | 3.3   | 3.7   | 3.8   | 3.8   |
| St8sia1    | 0.0   | 0.0   | 0.0   | 0.0   | 0.1   | 0.0   | 0.0   | 0.0   | 0.0   | 0.0   | 0.0   | 0.0   |
| St8sia2    | 0.0   | 0.0   | 0.0   | 0.0   | 0.0   | 0.0   | 0.0   | 0.1   | 0.1   | 0.0   | 0.0   | 0.0   |
| St8sia4    | 0.4   | 0.0   | 0.2   | 0.5   | 0.4   | 0.0   | 0.0   | 0.1   | 0.2   | 0.0   | 0.0   | 0.0   |
| St8sia6    | 0.1   | 0.0   | 0.0   | 0.1   | 0.0   | 0.0   | 0.1   | 0.0   | 0.0   | 0.0   | 0.0   | 0.0   |
| Stab1      | 1.3   | 0.1   | 0.2   | 5.4   | 9.0   | 0.2   | 0.9   | 0.5   | 0.5   | 0.8   | 0.3   | 0.8   |
| Stab2      | 0.0   | 0.0   | 0.0   | 0.0   | 0.0   | 0.0   | 0.0   | 0.0   | 0.0   | 0.0   | 0.0   | 0.0   |
| Stac       | 1.9   | 1.5   | 1.2   | 1.3   | 0.6   | 1.3   | 0.6   | 0.8   | 0.6   | 0.8   | 1.3   | 1.4   |
| Stac2      | 0.0   | 0.0   | 0.1   | 0.1   | 0.1   | 0.1   | 0.0   | 0.0   | 0.0   | 0.0   | 0.0   | 0.0   |

Online Table 1

|          |      |      |      |      |      |      |      |      |      |      |      |      |
|----------|------|------|------|------|------|------|------|------|------|------|------|------|
| Stac3    | 0.1  | 0.1  | 0.2  | 0.0  | 0.0  | 0.0  | 0.2  | 0.0  | 0.1  | 0.2  | 0.1  | 0.2  |
| Stag1    | 7.1  | 7.8  | 8.2  | 6.9  | 7.2  | 6.0  | 8.4  | 9.7  | 8.9  | 9.2  | 9.4  | 9.7  |
| Stag2    | 19.6 | 21.6 | 20.7 | 18.9 | 17.5 | 19.7 | 17.5 | 17.8 | 18.2 | 20.7 | 21.4 | 23.5 |
| Stag3    | 0.2  | 0.3  | 0.2  | 0.2  | 0.2  | 0.2  | 0.2  | 0.2  | 0.2  | 0.2  | 0.1  | 0.1  |
| Stam     | 13.0 | 12.6 | 11.1 | 14.4 | 11.5 | 13.7 | 11.6 | 10.3 | 11.3 | 12.5 | 14.3 | 13.2 |
| Stam2    | 14.2 | 12.4 | 11.7 | 14.3 | 13.5 | 13.1 | 12.9 | 13.0 | 12.7 | 13.1 | 14.7 | 14.9 |
| Stambp   | 3.6  | 5.7  | 6.1  | 5.1  | 4.6  | 5.2  | 5.1  | 5.1  | 4.3  | 4.6  | 5.0  | 5.1  |
| Stambpl1 | 12.9 | 14.8 | 14.0 | 12.2 | 13.4 | 10.7 | 13.0 | 12.9 | 13.2 | 8.2  | 12.4 | 11.8 |
| Stap1    | 3.0  | 0.0  | 0.2  | 20.5 | 47.8 | 0.0  | 6.4  | 0.4  | 1.4  | 3.8  | 1.3  | 4.2  |
| Stap2    | 1.4  | 0.6  | 0.7  | 0.6  | 0.6  | 0.8  | 0.6  | 0.5  | 0.4  | 1.1  | 0.7  | 0.3  |
| Star     | 2.3  | 2.3  | 1.2  | 2.7  | 2.6  | 5.2  | 1.9  | 1.1  | 1.1  | 6.2  | 3.7  | 2.3  |
| Stard10  | 6.4  | 4.8  | 6.9  | 2.5  | 3.2  | 4.5  | 3.6  | 5.7  | 5.1  | 8.5  | 4.4  | 5.8  |
| Stard13  | 7.4  | 8.5  | 7.2  | 7.2  | 6.7  | 7.5  | 9.0  | 10.1 | 11.7 | 9.4  | 9.7  | 9.4  |
| Stard3   | 6.4  | 5.8  | 5.7  | 8.2  | 7.9  | 7.4  | 6.9  | 6.5  | 7.7  | 7.9  | 7.2  | 6.3  |
| Stard3nl | 31.3 | 27.2 | 18.3 | 25.4 | 28.8 | 26.4 | 23.1 | 21.8 | 30.6 | 28.6 | 27.7 | 23.9 |
| Stard4   | 3.5  | 6.3  | 6.5  | 1.2  | 3.9  | 2.0  | 7.0  | 10.6 | 8.2  | 3.4  | 7.0  | 3.7  |
| Stard5   | 7.2  | 7.1  | 7.3  | 6.4  | 6.2  | 5.0  | 7.3  | 7.8  | 6.5  | 6.4  | 6.1  | 6.2  |
| Stard6   | 5.0  | 4.9  | 4.7  | 4.6  | 3.1  | 4.7  | 3.4  | 3.5  | 3.5  | 4.0  | 3.9  | 3.8  |
| Stard7   | 14.1 | 15.6 | 12.7 | 12.6 | 11.7 | 13.6 | 11.0 | 11.6 | 12.9 | 12.9 | 10.7 | 12.5 |
| Stard8   | 4.4  | 6.5  | 6.7  | 4.3  | 5.5  | 4.2  | 5.0  | 4.1  | 5.2  | 3.6  | 4.1  | 4.3  |
| Stat1    | 15.0 | 11.1 | 17.9 | 17.2 | 16.6 | 11.8 | 13.2 | 13.4 | 13.7 | 16.6 | 14.2 | 22.1 |
| Stat2    | 10.6 | 8.7  | 12.7 | 10.8 | 10.1 | 8.4  | 10.5 | 9.8  | 9.4  | 3.9  | 6.7  | 11.3 |
| Stat3    | 49.1 | 66.8 | 72.9 | 40.9 | 61.9 | 34.5 | 66.1 | 69.0 | 64.9 | 59.4 | 59.6 | 60.5 |
| Stat4    | 0.1  | 0.0  | 0.0  | 0.4  | 0.2  | 0.0  | 0.1  | 0.1  | 0.0  | 0.1  | 0.1  | 0.0  |
| Stat5a   | 3.9  | 4.1  | 4.3  | 3.4  | 3.5  | 3.6  | 4.5  | 3.8  | 4.0  | 3.1  | 2.8  | 3.7  |
| Stat5b   | 8.6  | 9.6  | 10.1 | 8.3  | 8.3  | 8.0  | 9.5  | 8.8  | 9.3  | 7.0  | 7.5  | 8.3  |
| Stat6    | 33.6 | 37.4 | 34.0 | 43.6 | 39.4 | 36.7 | 42.0 | 39.2 | 39.8 | 32.4 | 36.2 | 37.5 |
| Stau1    | 23.3 | 27.4 | 27.8 | 25.6 | 24.7 | 27.6 | 31.1 | 28.5 | 27.2 | 26.3 | 27.5 | 29.3 |
| Stau2    | 7.3  | 6.5  | 5.7  | 6.9  | 6.0  | 7.7  | 4.4  | 4.0  | 4.3  | 5.2  | 5.5  | 5.1  |
| Stbd1    | 11.8 | 7.7  | 5.5  | 9.7  | 8.7  | 11.6 | 13.5 | 5.5  | 24.6 | 22.0 | 22.5 | 26.4 |
| Stc1     | 0.1  | 0.1  | 0.5  | 0.0  | 0.0  | 0.0  | 0.1  | 0.1  | 0.1  | 0.1  | 0.1  | 0.1  |
| Stc2     | 4.2  | 3.2  | 2.4  | 6.1  | 4.2  | 4.1  | 4.0  | 5.4  | 2.9  | 2.5  | 2.8  | 2.3  |
| Steap1   | 10.1 | 9.7  | 8.7  | 9.0  | 11.5 | 7.7  | 12.7 | 8.8  | 8.0  | 14.6 | 10.2 | 10.4 |
| Steap2   | 16.9 | 16.5 | 13.1 | 21.5 | 17.4 | 20.6 | 20.0 | 10.6 | 12.2 | 18.1 | 17.1 | 16.1 |
| Steap3   | 2.4  | 5.8  | 10.4 | 2.7  | 3.8  | 2.6  | 3.0  | 9.6  | 3.8  | 3.0  | 2.6  | 3.2  |
| Steap4   | 1.5  | 0.6  | 2.8  | 0.1  | 0.4  | 0.0  | 0.4  | 3.1  | 1.2  | 3.1  | 1.3  | 1.7  |
| Stil     | 0.5  | 0.9  | 1.0  | 0.4  | 1.2  | 0.2  | 1.2  | 0.6  | 0.9  | 0.5  | 0.8  | 0.5  |
| Stim1    | 23.7 | 25.4 | 17.5 | 26.9 | 18.5 | 29.3 | 17.2 | 13.4 | 15.5 | 18.1 | 16.8 | 13.2 |
| Stim2    | 11.7 | 11.0 | 12.1 | 12.2 | 10.5 | 11.7 | 12.9 | 11.6 | 10.6 | 12.8 | 13.7 | 11.9 |
| Stip1    | 64.5 | 68.8 | 65.4 | 70.2 | 54.4 | 54.4 | 62.4 | 57.5 | 55.3 | 66.4 | 71.9 | 66.7 |
| Stk10    | 2.5  | 2.1  | 1.8  | 4.5  | 6.5  | 1.7  | 3.0  | 2.7  | 1.7  | 3.5  | 3.1  | 2.5  |
| Stk11    | 32.3 | 32.0 | 30.0 | 37.5 | 31.9 | 38.4 | 31.4 | 29.6 | 28.9 | 27.8 | 30.1 | 30.5 |
| Stk11ip  | 1.9  | 1.7  | 1.7  | 2.4  | 2.4  | 2.1  | 2.2  | 2.0  | 2.0  | 2.1  | 1.7  | 1.7  |
| Stk16    | 10.7 | 9.9  | 9.6  | 10.6 | 9.7  | 11.3 | 10.0 | 10.6 | 9.9  | 9.9  | 9.6  | 9.9  |
| Stk17b   | 8.8  | 6.6  | 10.6 | 13.5 | 19.4 | 10.1 | 9.7  | 6.5  | 8.8  | 9.9  | 7.6  | 12.7 |
| Stk19    | 10.1 | 7.5  | 5.5  | 10.6 | 9.2  | 9.2  | 8.1  | 8.8  | 8.6  | 9.0  | 8.9  | 7.5  |
| Stk24    | 19.0 | 22.0 | 20.7 | 21.7 | 19.3 | 19.3 | 21.6 | 16.9 | 19.0 | 20.0 | 20.9 | 20.0 |
| Stk25    | 29.4 | 26.6 | 27.5 | 28.8 | 26.8 | 29.7 | 31.3 | 27.0 | 31.3 | 24.1 | 28.3 | 29.0 |
| Sik3     | 16.4 | 17.3 | 21.9 | 19.3 | 14.2 | 17.1 | 20.3 | 19.3 | 17.5 | 16.1 | 23.8 | 22.7 |
| Stk30    | 1.2  | 0.8  | 0.7  | 0.8  | 0.4  | 1.5  | 0.6  | 0.7  | 0.3  | 0.5  | 0.5  | 0.6  |
| Stk31    | 0.1  | 0.1  | 0.0  | 0.1  | 0.0  | 0.0  | 0.1  | 0.0  | 0.0  | 0.0  | 0.0  | 0.0  |
| Stk32a   | 0.0  | 0.0  | 0.1  | 0.0  | 0.0  | 0.0  | 0.0  | 0.0  | 0.0  | 0.0  | 0.0  | 0.0  |
| Stk32b   | 0.1  | 0.1  | 0.2  | 0.1  | 0.1  | 0.1  | 0.1  | 0.1  | 0.0  | 0.0  | 0.0  | 0.0  |
| Stk32c   | 0.5  | 0.6  | 0.5  | 0.9  | 0.3  | 0.6  | 0.6  | 0.2  | 0.4  | 0.1  | 0.2  | 0.2  |
| Stk33    | 0.1  | 0.1  | 0.2  | 0.1  | 0.1  | 0.1  | 0.2  | 0.2  | 0.1  | 0.0  | 0.1  | 0.0  |
| Stk35    | 2.8  | 3.4  | 3.4  | 2.5  | 2.8  | 3.0  | 2.6  | 3.0  | 2.7  | 2.8  | 2.6  | 2.5  |
| Stk36    | 1.1  | 1.0  | 0.9  | 1.0  | 0.9  | 1.3  | 0.6  | 0.8  | 0.7  | 0.9  | 0.8  | 0.7  |

Online Table 1

|           |      |      |      |      |      |      |      |      |      |      |      |      |
|-----------|------|------|------|------|------|------|------|------|------|------|------|------|
| Stk38     | 18.2 | 19.8 | 22.0 | 18.4 | 18.6 | 18.5 | 18.0 | 18.9 | 19.6 | 15.7 | 20.2 | 19.4 |
| Stk38l    | 8.6  | 7.3  | 7.5  | 8.4  | 8.7  | 6.8  | 6.0  | 5.5  | 4.8  | 5.4  | 5.6  | 6.0  |
| Stk39     | 19.8 | 12.9 | 10.8 | 19.4 | 11.3 | 16.3 | 13.2 | 8.7  | 12.5 | 20.3 | 18.4 | 16.4 |
| Stk4      | 13.0 | 12.8 | 10.4 | 17.4 | 13.6 | 13.4 | 12.0 | 10.0 | 10.0 | 10.6 | 13.1 | 10.7 |
| Stk40     | 5.3  | 5.5  | 5.3  | 6.2  | 7.0  | 4.1  | 5.4  | 5.2  | 4.7  | 5.7  | 6.0  | 4.1  |
| Stmn1     | 18.0 | 24.6 | 39.4 | 11.3 | 37.7 | 10.9 | 38.6 | 13.3 | 31.1 | 22.6 | 31.8 | 21.3 |
| Stmn1-rs1 | 0.0  | 0.0  | 0.1  | 0.0  | 0.1  | 0.0  | 0.1  | 0.0  | 0.0  | 0.0  | 0.3  | 0.0  |
| Stmn2     | 0.2  | 0.0  | 0.0  | 0.0  | 0.0  | 0.1  | 0.1  | 0.0  | 0.0  | 0.0  | 0.0  | 0.1  |
| Stmn4     | 0.0  | 0.0  | 0.0  | 0.0  | 0.2  | 0.0  | 0.1  | 0.0  | 0.1  | 0.0  | 0.1  | 0.0  |
| Stmnd1    | 0.0  | 0.0  | 0.0  | 0.0  | 0.0  | 0.0  | 0.1  | 0.0  | 0.0  | 0.0  | 0.0  | 0.0  |
| Stom      | 24.5 | 22.0 | 18.3 | 35.7 | 36.1 | 29.4 | 22.2 | 15.3 | 19.5 | 29.0 | 24.1 | 22.4 |
| Stoml1    | 14.8 | 13.4 | 11.9 | 15.6 | 12.1 | 17.5 | 13.7 | 11.6 | 14.0 | 10.8 | 11.9 | 13.0 |
| Stoml2    | 19.7 | 21.0 | 19.9 | 16.1 | 19.3 | 19.6 | 17.4 | 23.0 | 17.7 | 21.0 | 21.3 | 20.7 |
| Ston1     | 27.4 | 23.5 | 15.4 | 37.7 | 31.8 | 26.8 | 37.8 | 15.3 | 27.4 | 27.3 | 28.0 | 25.4 |
| Ston2     | 0.6  | 0.8  | 1.1  | 0.3  | 0.6  | 0.4  | 0.8  | 1.7  | 0.7  | 0.5  | 1.1  | 0.6  |
| Stox1     | 0.2  | 0.1  | 0.4  | 0.1  | 0.1  | 0.1  | 0.0  | 0.1  | 0.1  | 0.0  | 0.1  | 0.1  |
| Stox2     | 3.6  | 3.8  | 3.5  | 3.5  | 3.5  | 3.4  | 3.7  | 2.9  | 3.0  | 2.8  | 3.3  | 3.4  |
| Stpg1     | 0.1  | 0.1  | 0.1  | 0.1  | 0.0  | 0.1  | 0.0  | 0.1  | 0.0  | 0.0  | 0.1  | 0.1  |
| Stpg2     | 0.1  | 0.0  | 0.0  | 0.1  | 0.0  | 0.0  | 0.0  | 0.0  | 0.0  | 0.0  | 0.1  | 0.0  |
| Stra13    | 10.5 | 10.2 | 10.6 | 15.0 | 12.6 | 10.6 | 8.9  | 12.0 | 9.8  | 10.7 | 12.6 | 9.4  |
| Stra6     | 0.0  | 0.0  | 0.0  | 0.0  | 0.0  | 0.0  | 0.0  | 0.0  | 0.0  | 0.0  | 0.0  | 0.0  |
| Strada    | 5.5  | 5.8  | 6.1  | 5.6  | 5.3  | 5.6  | 6.0  | 6.2  | 5.7  | 5.5  | 6.0  | 4.7  |
| Stradb    | 9.9  | 9.0  | 6.7  | 7.9  | 6.9  | 9.7  | 6.3  | 5.2  | 6.7  | 7.1  | 6.9  | 7.1  |
| Strap     | 51.7 | 47.3 | 41.6 | 49.6 | 46.2 | 49.8 | 44.7 | 42.2 | 41.2 | 47.9 | 48.2 | 44.8 |
| Strbp     | 2.5  | 2.0  | 2.0  | 2.2  | 1.9  | 2.6  | 1.3  | 1.3  | 1.2  | 1.9  | 2.0  | 2.0  |
| Strip1    | 8.6  | 9.3  | 10.1 | 9.4  | 9.1  | 9.3  | 11.9 | 10.3 | 10.4 | 9.4  | 9.3  | 9.5  |
| Strip2    | 0.1  | 0.3  | 0.8  | 0.1  | 0.3  | 0.0  | 0.2  | 0.5  | 0.2  | 0.1  | 0.2  | 0.3  |
| Strn      | 7.7  | 8.7  | 9.2  | 8.9  | 7.9  | 7.6  | 8.8  | 8.8  | 8.9  | 9.2  | 10.0 | 10.1 |
| Strn3     | 55.5 | 63.6 | 63.3 | 59.1 | 42.3 | 56.7 | 49.5 | 47.6 | 52.5 | 50.3 | 61.2 | 63.0 |
| Strn4     | 15.9 | 16.1 | 13.9 | 16.7 | 15.1 | 15.1 | 15.2 | 12.4 | 15.4 | 13.2 | 14.4 | 13.4 |
| Stf3a     | 95.7 | 81.8 | 84.1 | 93.4 | 87.8 | 88.9 | 89.7 | 99.3 | 88.2 | 95.3 | 96.5 | 95.2 |
| Stf3b     | 52.2 | 50.8 | 46.4 | 50.5 | 51.2 | 51.4 | 56.3 | 60.9 | 55.4 | 54.6 | 57.4 | 53.9 |
| Stub1     | 36.4 | 37.2 | 33.3 | 37.7 | 31.5 | 38.9 | 39.9 | 42.4 | 38.9 | 37.1 | 35.5 | 33.2 |
| Stx11     | 1.8  | 1.8  | 1.9  | 1.4  | 2.6  | 2.6  | 2.3  | 2.4  | 2.3  | 2.1  | 2.1  | 1.8  |
| Stx12     | 33.6 | 32.9 | 33.5 | 35.5 | 33.6 | 34.3 | 35.2 | 31.3 | 33.7 | 34.5 | 40.1 | 38.4 |
| Stx16     | 9.0  | 10.4 | 9.9  | 10.7 | 9.6  | 11.3 | 9.1  | 9.1  | 9.3  | 9.4  | 9.4  | 8.8  |
| Stx17     | 5.2  | 4.7  | 4.6  | 5.4  | 4.1  | 5.5  | 5.0  | 5.2  | 5.0  | 4.6  | 5.1  | 4.8  |
| Stx18     | 16.5 | 16.5 | 15.3 | 13.2 | 12.4 | 12.3 | 14.3 | 16.8 | 13.9 | 14.8 | 18.1 | 16.6 |
| Stx19     | 0.0  | 0.2  | 0.0  | 0.0  | 0.2  | 0.3  | 0.1  | 0.2  | 0.1  | 0.0  | 0.0  | 0.0  |
| Stx1a     | 0.9  | 1.6  | 1.7  | 1.7  | 1.5  | 1.2  | 1.9  | 1.7  | 2.1  | 1.7  | 1.7  | 1.3  |
| Stx1b     | 0.0  | 0.0  | 0.2  | 0.0  | 0.0  | 0.1  | 0.0  | 0.0  | 0.0  | 0.1  | 0.0  | 0.1  |
| Stx2      | 23.3 | 23.7 | 21.3 | 25.9 | 22.6 | 22.7 | 25.3 | 30.6 | 25.5 | 18.6 | 25.3 | 22.6 |
| Stx3      | 5.0  | 3.5  | 3.4  | 5.5  | 6.1  | 5.6  | 4.0  | 2.8  | 3.6  | 5.2  | 4.3  | 4.6  |
| Stx4a     | 12.8 | 15.4 | 17.8 | 16.7 | 16.7 | 17.8 | 15.7 | 16.7 | 15.1 | 15.2 | 15.6 | 15.6 |
| Stx5a     | 31.3 | 33.2 | 28.6 | 31.6 | 27.6 | 30.9 | 28.4 | 32.1 | 32.3 | 34.1 | 31.2 | 31.1 |
| Stx6      | 12.4 | 11.4 | 11.2 | 10.8 | 11.9 | 10.3 | 11.5 | 11.3 | 10.9 | 12.1 | 11.3 | 10.8 |
| Stx7      | 31.4 | 28.9 | 26.5 | 39.3 | 30.4 | 36.8 | 31.0 | 22.8 | 28.3 | 29.8 | 35.9 | 36.6 |
| Stx8      | 7.9  | 6.6  | 5.8  | 7.9  | 5.4  | 7.6  | 5.9  | 5.7  | 5.3  | 5.5  | 6.0  | 6.5  |
| Stxbp1    | 5.1  | 5.8  | 5.9  | 5.8  | 5.4  | 6.1  | 7.0  | 5.2  | 5.2  | 4.2  | 5.0  | 4.3  |
| Stxbp2    | 7.0  | 5.1  | 5.0  | 6.4  | 7.6  | 5.1  | 3.6  | 2.7  | 2.8  | 7.6  | 4.4  | 4.6  |
| Stxbp3a   | 12.0 | 12.1 | 12.6 | 11.7 | 12.8 | 11.1 | 10.9 | 11.0 | 12.4 | 13.8 | 13.8 | 14.7 |
| Stxbp3b   | 0.4  | 0.4  | 0.3  | 0.5  | 0.3  | 0.6  | 0.8  | 0.3  | 0.4  | 0.8  | 0.5  | 0.4  |
| Stxbp4    | 3.5  | 3.6  | 3.8  | 3.3  | 2.8  | 4.1  | 3.0  | 3.3  | 3.1  | 3.5  | 3.4  | 3.5  |
| Stxbp5    | 4.9  | 5.1  | 4.2  | 5.3  | 4.7  | 5.3  | 3.8  | 3.6  | 3.5  | 4.0  | 4.1  | 3.7  |
| Stxbp5l   | 0.0  | 0.0  | 0.0  | 0.0  | 0.0  | 0.0  | 0.0  | 0.0  | 0.0  | 0.0  | 0.0  | 0.0  |
| Stxbp6    | 0.2  | 0.3  | 0.3  | 0.2  | 0.2  | 0.1  | 0.1  | 0.1  | 0.1  | 0.3  | 0.3  | 0.1  |
| Styk1     | 2.1  | 1.0  | 0.7  | 2.3  | 1.0  | 1.5  | 0.9  | 0.3  | 0.6  | 1.2  | 1.4  | 0.6  |

Online Table 1



|          |       |       |       |       |       |       |       |       |       |       |       |       |
|----------|-------|-------|-------|-------|-------|-------|-------|-------|-------|-------|-------|-------|
| Styx     | 5.2   | 5.8   | 5.9   | 7.4   | 5.3   | 6.7   | 4.5   | 4.6   | 5.5   | 5.4   | 6.1   | 6.6   |
| Styx1    | 0.5   | 0.4   | 0.2   | 0.1   | 0.1   | 0.2   | 0.1   | 0.1   | 0.1   | 0.0   | 0.2   | 0.1   |
| Sub1     | 15.4  | 15.3  | 17.2  | 14.0  | 14.2  | 12.5  | 16.4  | 16.7  | 15.9  | 18.4  | 19.4  | 18.7  |
| Sucla2   | 42.5  | 37.6  | 36.5  | 44.4  | 32.8  | 39.1  | 29.5  | 33.5  | 32.2  | 37.8  | 38.7  | 39.9  |
| Suclg1   | 29.3  | 27.2  | 27.8  | 35.1  | 27.0  | 29.2  | 26.3  | 27.4  | 24.9  | 30.1  | 28.7  | 29.6  |
| Suclg2   | 26.3  | 23.3  | 25.8  | 21.7  | 20.6  | 23.8  | 20.2  | 22.7  | 19.1  | 25.3  | 22.6  | 24.1  |
| Sucnr1   | 3.5   | 5.0   | 3.2   | 6.4   | 1.4   | 4.6   | 1.1   | 0.5   | 0.7   | 0.7   | 0.6   | 0.4   |
| Suco     | 12.2  | 12.9  | 12.2  | 11.3  | 13.4  | 11.4  | 14.3  | 11.8  | 15.2  | 13.9  | 16.3  | 15.4  |
| Suds3    | 29.6  | 28.2  | 27.8  | 30.4  | 25.3  | 31.6  | 25.4  | 25.9  | 23.1  | 29.3  | 26.2  | 29.3  |
| Sufu     | 1.9   | 2.4   | 2.3   | 2.0   | 2.5   | 1.6   | 3.0   | 2.4   | 2.5   | 2.7   | 1.8   | 1.8   |
| Sugp1    | 9.3   | 11.3  | 11.9  | 12.5  | 9.3   | 10.2  | 10.3  | 10.9  | 9.2   | 9.7   | 11.9  | 10.7  |
| Sugp2    | 6.1   | 6.2   | 5.8   | 5.3   | 5.3   | 5.3   | 5.7   | 5.2   | 6.2   | 5.4   | 5.0   | 4.5   |
| Sugt1    | 39.4  | 37.1  | 32.0  | 33.6  | 30.7  | 34.6  | 32.3  | 30.3  | 32.5  | 36.2  | 37.6  | 39.0  |
| Sulf1    | 111.2 | 83.3  | 71.9  | 105.7 | 92.3  | 88.0  | 94.1  | 95.5  | 67.7  | 131.5 | 111.0 | 95.3  |
| Sulf2    | 29.7  | 26.1  | 31.4  | 26.8  | 26.1  | 31.5  | 36.1  | 41.2  | 27.8  | 34.4  | 36.6  | 33.4  |
| Sult1a1  | 0.7   | 0.2   | 0.1   | 0.8   | 0.3   | 0.5   | 0.1   | 0.1   | 0.1   | 0.2   | 0.0   | 0.0   |
| Sult2b1  | 0.3   | 0.1   | 0.1   | 0.1   | 0.2   | 0.0   | 0.0   | 0.2   | 0.1   | 0.2   | 0.2   | 0.1   |
| Sult4a1  | 3.4   | 1.4   | 0.8   | 3.6   | 1.1   | 2.3   | 1.4   | 0.3   | 0.5   | 0.6   | 1.0   | 0.4   |
| Sult5a1  | 0.0   | 0.1   | 0.3   | 0.1   | 0.0   | 0.1   | 0.1   | 0.1   | 0.0   | 0.0   | 0.1   | 0.0   |
| Sult6b1  | 0.1   | 0.1   | 0.2   | 0.2   | 0.3   | 0.1   | 0.1   | 0.2   | 0.3   | 0.1   | 0.1   | 0.2   |
| Sumf1    | 53.4  | 39.4  | 35.0  | 58.5  | 43.9  | 60.1  | 42.0  | 38.5  | 39.1  | 38.8  | 42.8  | 48.3  |
| Sumf2    | 8.4   | 9.0   | 9.0   | 8.4   | 7.9   | 10.4  | 9.9   | 11.1  | 9.1   | 9.0   | 8.7   | 8.1   |
| Sumo1    | 90.6  | 87.4  | 100.8 | 91.7  | 87.4  | 91.5  | 85.0  | 77.9  | 75.7  | 91.8  | 86.7  | 106.4 |
| Sumo2    | 102.7 | 101.7 | 138.9 | 128.6 | 113.2 | 131.9 | 128.7 | 141.0 | 112.9 | 126.5 | 156.7 | 148.6 |
| Sumo3    | 17.8  | 17.0  | 17.2  | 18.2  | 17.2  | 16.7  | 17.3  | 19.4  | 16.2  | 19.3  | 18.7  | 19.8  |
| Sun1     | 17.6  | 16.1  | 16.1  | 17.3  | 15.3  | 17.6  | 16.4  | 16.7  | 16.5  | 14.5  | 16.6  | 15.1  |
| Sun2     | 17.1  | 15.0  | 14.1  | 20.3  | 18.8  | 21.9  | 18.3  | 11.7  | 16.5  | 15.3  | 14.3  | 15.1  |
| Suox     | 9.6   | 9.0   | 8.0   | 10.3  | 6.1   | 9.1   | 7.3   | 5.4   | 6.1   | 7.9   | 7.1   | 6.7   |
| Supt16   | 26.9  | 23.4  | 26.7  | 27.1  | 25.6  | 26.7  | 26.1  | 24.3  | 20.2  | 22.8  | 27.1  | 29.5  |
| Supt20   | 8.7   | 10.8  | 10.9  | 8.0   | 10.0  | 8.7   | 12.5  | 10.8  | 11.3  | 9.1   | 11.9  | 10.0  |
| Supt3    | 2.3   | 3.6   | 3.6   | 2.4   | 2.9   | 3.6   | 3.5   | 3.1   | 3.0   | 2.0   | 2.5   | 3.4   |
| Supt4a   | 32.1  | 26.2  | 24.0  | 29.6  | 25.2  | 28.1  | 25.1  | 28.6  | 25.3  | 32.0  | 27.2  | 28.8  |
| Supt5    | 52.3  | 49.8  | 47.9  | 61.2  | 42.4  | 45.6  | 45.8  | 38.7  | 39.0  | 43.4  | 45.6  | 46.5  |
| Supt6    | 17.5  | 17.3  | 20.1  | 20.0  | 18.6  | 18.2  | 20.2  | 20.3  | 17.3  | 20.7  | 21.3  | 24.3  |
| Supt7l   | 6.0   | 6.1   | 6.3   | 6.9   | 5.7   | 6.0   | 5.6   | 5.8   | 5.2   | 6.1   | 5.4   | 5.6   |
| Supv3l1  | 6.9   | 6.5   | 6.5   | 5.7   | 6.0   | 7.7   | 6.2   | 6.5   | 6.0   | 6.2   | 7.1   | 6.5   |
| Surf1    | 27.7  | 25.4  | 23.5  | 28.9  | 22.8  | 26.9  | 24.4  | 24.7  | 22.1  | 27.0  | 28.8  | 29.0  |
| Surf2    | 18.6  | 15.4  | 16.0  | 19.4  | 11.7  | 19.4  | 18.1  | 16.5  | 12.6  | 15.1  | 18.2  | 18.2  |
| Surf4    | 136.2 | 124.9 | 114.2 | 148.3 | 137.4 | 123.2 | 153.5 | 147.7 | 144.4 | 143.5 | 152.3 | 138.2 |
| Surf6    | 7.8   | 7.1   | 7.1   | 9.4   | 7.9   | 7.8   | 8.0   | 7.3   | 6.8   | 7.1   | 7.6   | 8.5   |
| Susd1    | 0.7   | 0.6   | 0.4   | 0.6   | 1.1   | 0.7   | 0.4   | 0.4   | 0.2   | 0.4   | 0.3   | 0.3   |
| Susd2    | 3.7   | 4.2   | 4.5   | 5.4   | 7.6   | 5.6   | 7.1   | 3.2   | 4.2   | 1.8   | 2.6   | 1.3   |
| Susd3    | 0.3   | 0.0   | 0.0   | 2.1   | 5.9   | 0.0   | 0.5   | 0.1   | 0.1   | 0.1   | 0.1   | 0.1   |
| Susd4    | 0.2   | 0.2   | 0.1   | 0.0   | 0.0   | 0.2   | 0.0   | 0.1   | 0.1   | 0.3   | 0.1   | 0.1   |
| Susd5    | 0.0   | 0.0   | 0.0   | 0.0   | 0.0   | 0.0   | 0.1   | 0.0   | 0.0   | 0.0   | 0.0   | 0.0   |
| Suv39h1  | 2.5   | 2.5   | 2.6   | 1.8   | 3.2   | 1.7   | 3.3   | 2.7   | 3.3   | 2.5   | 2.3   | 2.1   |
| Suv39h2  | 0.4   | 0.3   | 0.5   | 0.3   | 0.4   | 0.3   | 0.4   | 0.3   | 0.3   | 0.3   | 0.4   | 0.4   |
| Suv420h1 | 5.7   | 6.4   | 7.0   | 6.7   | 7.2   | 5.4   | 7.1   | 8.0   | 7.6   | 7.3   | 8.0   | 7.8   |
| Suv420h2 | 1.3   | 2.3   | 2.0   | 1.2   | 2.0   | 1.5   | 1.2   | 1.4   | 2.2   | 1.8   | 1.5   | 1.4   |
| Suz12    | 5.3   | 5.8   | 6.4   | 4.1   | 5.6   | 5.3   | 4.9   | 4.8   | 4.5   | 5.1   | 6.3   | 5.6   |
| Sv2a     | 0.2   | 0.2   | 0.2   | 0.1   | 0.1   | 0.1   | 0.1   | 0.2   | 0.3   | 1.4   | 0.5   | 0.3   |
| Sv2b     | 0.1   | 0.0   | 0.0   | 0.1   | 0.0   | 0.0   | 0.0   | 0.0   | 0.0   | 0.0   | 0.0   | 0.0   |
| Sv2c     | 0.0   | 0.1   | 0.0   | 0.0   | 0.0   | 0.1   | 0.0   | 0.0   | 0.0   | 0.0   | 0.0   | 0.0   |
| Svep1    | 34.4  | 73.7  | 104.5 | 27.1  | 49.6  | 27.6  | 44.0  | 72.5  | 50.6  | 36.1  | 38.0  | 39.1  |
| Svil     | 6.8   | 7.1   | 8.7   | 6.5   | 7.1   | 5.5   | 7.8   | 7.0   | 7.2   | 9.8   | 10.1  | 9.6   |
| Svip     | 0.6   | 0.1   | 0.3   | 0.2   | 0.1   | 0.3   | 0.0   | 0.1   | 0.1   | 0.2   | 0.2   | 0.1   |
| Svop     | 3.7   | 2.7   | 1.5   | 2.2   | 2.5   | 2.4   | 1.4   | 0.4   | 0.9   | 1.8   | 1.3   | 1.8   |

Online Table 1

|           |       |       |       |       |       |       |       |       |       |       |       |       |
|-----------|-------|-------|-------|-------|-------|-------|-------|-------|-------|-------|-------|-------|
| Svopl     | 0.0   | 0.0   | 0.0   | 0.0   | 0.0   | 0.0   | 0.1   | 0.0   | 0.0   | 0.0   | 0.0   | 0.0   |
| Swap70    | 9.6   | 10.0  | 9.6   | 16.1  | 14.8  | 11.4  | 8.9   | 8.7   | 9.3   | 9.4   | 7.9   | 9.7   |
| Swi5      | 225.8 | 192.4 | 240.2 | 225.7 | 175.2 | 219.2 | 227.8 | 223.7 | 185.1 | 214.4 | 239.9 | 261.2 |
| Swsap1    | 2.6   | 2.0   | 2.2   | 3.6   | 2.6   | 3.1   | 3.0   | 2.8   | 2.3   | 2.3   | 2.7   | 2.4   |
| Swt1      | 3.4   | 4.2   | 4.5   | 3.8   | 3.6   | 3.6   | 2.7   | 3.4   | 3.0   | 4.3   | 5.2   | 4.2   |
| Syap1     | 29.1  | 26.2  | 29.0  | 33.2  | 29.2  | 31.4  | 26.6  | 27.3  | 26.0  | 30.0  | 34.1  | 34.0  |
| Sybu      | 0.1   | 0.1   | 0.2   | 0.0   | 0.0   | 0.0   | 0.1   | 0.1   | 0.1   | 0.1   | 0.1   | 0.1   |
| Syce1     | 0.5   | 0.3   | 0.2   | 0.5   | 0.1   | 0.2   | 0.2   | 0.3   | 0.2   | 0.3   | 0.4   | 0.1   |
| Syce2     | 1.2   | 1.9   | 2.9   | 2.8   | 2.6   | 1.6   | 2.8   | 0.8   | 1.9   | 1.9   | 1.6   | 2.2   |
| Sycp1     | 0.0   | 0.0   | 0.0   | 0.0   | 0.0   | 0.0   | 0.0   | 0.0   | 0.0   | 0.0   | 0.0   | 0.0   |
| Sycp1-ps1 | 0.0   | 0.0   | 0.0   | 0.0   | 0.0   | 0.0   | 0.0   | 0.0   | 0.0   | 0.0   | 0.0   | 0.0   |
| Sycp2     | 0.0   | 0.0   | 0.0   | 0.0   | 0.0   | 0.0   | 0.0   | 0.0   | 0.0   | 0.1   | 0.0   | 0.0   |
| Sycp3     | 0.3   | 1.0   | 0.7   | 0.9   | 0.5   | 1.4   | 0.1   | 0.4   | 0.3   | 0.2   | 0.9   | 1.0   |
| Syde1     | 21.6  | 21.9  | 19.6  | 25.1  | 20.0  | 24.1  | 25.9  | 21.2  | 23.2  | 21.2  | 22.1  | 19.1  |
| Syde2     | 1.1   | 1.1   | 1.1   | 1.2   | 0.8   | 1.2   | 1.0   | 1.2   | 1.4   | 1.6   | 1.4   | 1.4   |
| Syf2      | 51.5  | 52.5  | 52.1  | 64.2  | 39.1  | 50.0  | 46.8  | 47.6  | 43.6  | 46.7  | 54.3  | 56.1  |
| Syk       | 2.9   | 2.3   | 1.7   | 6.7   | 12.1  | 3.3   | 4.9   | 2.7   | 2.3   | 1.9   | 2.3   | 2.4   |
| Sympk     | 21.6  | 21.3  | 17.7  | 21.2  | 20.3  | 21.9  | 18.1  | 17.3  | 17.9  | 18.3  | 18.1  | 15.0  |
| Syn1      | 0.2   | 0.3   | 0.1   | 0.2   | 0.4   | 0.2   | 0.4   | 0.2   | 0.3   | 0.3   | 0.2   | 0.1   |
| Syn2      | 1.8   | 1.8   | 1.2   | 2.0   | 1.1   | 1.8   | 0.7   | 0.3   | 0.4   | 0.7   | 0.6   | 0.5   |
| Syn3      | 0.2   | 0.2   | 0.1   | 0.2   | 0.1   | 0.2   | 0.2   | 0.2   | 0.1   | 0.2   | 0.2   | 0.2   |
| Syna      | 0.1   | 0.1   | 0.1   | 0.2   | 0.1   | 0.2   | 0.1   | 0.0   | 0.0   | 0.0   | 0.0   | 0.1   |
| Synb      | 0.0   | 0.0   | 0.0   | 0.1   | 0.0   | 0.0   | 0.0   | 0.0   | 0.0   | 0.0   | 0.0   | 0.0   |
| Sync      | 7.6   | 6.4   | 5.6   | 8.4   | 5.7   | 9.7   | 6.7   | 6.1   | 6.6   | 6.8   | 8.5   | 7.0   |
| Syncrip   | 21.0  | 18.8  | 20.2  | 21.6  | 22.8  | 17.8  | 23.7  | 24.4  | 19.7  | 23.8  | 27.1  | 25.2  |
| Syndig1   | 0.2   | 0.1   | 0.2   | 0.0   | 0.0   | 0.1   | 0.1   | 0.0   | 0.1   | 0.0   | 0.0   | 0.0   |
| Syne1     | 2.6   | 2.3   | 2.3   | 3.4   | 3.6   | 2.5   | 2.6   | 2.7   | 1.9   | 2.0   | 2.1   | 2.0   |
| Syne2     | 5.7   | 7.4   | 6.5   | 4.1   | 5.3   | 6.0   | 5.4   | 5.2   | 5.8   | 12.4  | 8.7   | 9.8   |
| Syne3     | 2.6   | 2.8   | 3.8   | 2.2   | 3.0   | 2.1   | 2.9   | 5.0   | 2.5   | 1.8   | 2.7   | 2.8   |
| Syne4     | 0.0   | 0.1   | 0.0   | 0.0   | 0.0   | 0.0   | 0.1   | 0.0   | 0.1   | 0.1   | 0.0   | 0.0   |
| Syngr1    | 2.6   | 0.8   | 0.4   | 4.6   | 2.0   | 3.1   | 0.3   | 0.4   | 0.2   | 1.1   | 0.8   | 0.6   |
| Syngr2    | 40.4  | 42.0  | 38.0  | 42.8  | 43.8  | 39.5  | 48.1  | 51.2  | 53.0  | 53.0  | 48.6  | 47.2  |
| Syngr3    | 0.1   | 0.1   | 0.1   | 0.1   | 0.1   | 0.0   | 0.0   | 0.0   | 0.1   | 0.0   | 0.1   | 0.0   |
| Syngr4    | 0.1   | 0.1   | 0.0   | 0.0   | 0.0   | 0.0   | 0.0   | 0.0   | 0.3   | 0.1   | 0.1   | 0.0   |
| Synj1     | 1.7   | 2.3   | 2.4   | 2.0   | 2.6   | 1.9   | 2.0   | 2.1   | 2.2   | 2.3   | 2.0   | 1.9   |
| Synj2     | 3.5   | 3.5   | 5.1   | 3.7   | 4.2   | 4.0   | 4.0   | 5.5   | 4.5   | 5.0   | 4.2   | 5.3   |
| Synj2bp   | 7.8   | 6.7   | 6.2   | 11.6  | 7.1   | 9.6   | 7.5   | 5.9   | 6.2   | 7.6   | 9.6   | 8.7   |
| Synm      | 1.3   | 1.5   | 1.3   | 1.3   | 1.4   | 1.3   | 1.0   | 0.6   | 0.5   | 0.6   | 0.7   | 0.5   |
| Synpo     | 46.5  | 42.8  | 35.5  | 57.0  | 56.1  | 42.3  | 75.4  | 42.6  | 63.6  | 49.6  | 53.9  | 55.1  |
| Synpo2    | 6.2   | 7.6   | 7.8   | 16.4  | 9.4   | 11.0  | 10.6  | 4.9   | 8.2   | 4.8   | 7.7   | 9.4   |
| Synpo2l   | 0.1   | 0.1   | 0.0   | 0.1   | 0.0   | 0.1   | 0.1   | 0.1   | 0.1   | 0.1   | 0.0   | 0.1   |
| Synpr     | 0.3   | 0.1   | 0.1   | 0.0   | 0.2   | 0.0   | 0.1   | 0.2   | 0.2   | 0.7   | 0.3   | 0.3   |
| Synrg     | 5.5   | 4.5   | 3.6   | 7.3   | 4.6   | 5.6   | 4.2   | 3.4   | 3.1   | 4.6   | 4.0   | 3.6   |
| Syp       | 0.1   | 0.3   | 0.3   | 0.4   | 0.5   | 0.2   | 0.2   | 0.2   | 0.2   | 0.1   | 0.1   | 0.2   |
| Sypl      | 6.1   | 5.7   | 5.5   | 6.5   | 6.2   | 7.0   | 5.5   | 5.5   | 6.1   | 5.9   | 6.5   | 6.1   |
| Sypl2     | 0.0   | 0.0   | 0.0   | 0.0   | 0.0   | 0.0   | 0.0   | 0.0   | 0.0   | 0.0   | 0.0   | 0.0   |
| Sys1      | 11.2  | 9.5   | 8.3   | 10.2  | 9.1   | 9.6   | 9.8   | 9.9   | 10.6  | 12.7  | 9.9   | 11.2  |
| Syt1      | 0.3   | 0.0   | 0.0   | 0.1   | 0.0   | 0.0   | 0.0   | 0.0   | 0.3   | 0.0   | 0.0   | 0.3   |
| Syt11     | 3.6   | 3.4   | 3.3   | 4.2   | 4.6   | 3.7   | 2.9   | 3.7   | 2.7   | 3.6   | 2.9   | 3.5   |
| Syt12     | 0.7   | 0.7   | 0.6   | 0.7   | 0.5   | 0.8   | 0.6   | 0.4   | 0.4   | 0.7   | 0.7   | 0.5   |
| Syt13     | 5.1   | 5.7   | 4.3   | 7.3   | 7.5   | 7.7   | 9.2   | 6.3   | 5.7   | 1.5   | 2.9   | 2.3   |
| Syt14     | 0.5   | 0.2   | 0.1   | 0.8   | 0.1   | 0.3   | 0.3   | 0.1   | 0.1   | 0.1   | 0.1   | 0.1   |
| Syt15     | 0.0   | 0.0   | 0.1   | 0.0   | 0.1   | 0.0   | 0.1   | 0.1   | 0.0   | 0.0   | 0.0   | 0.0   |
| Syt17     | 10.1  | 13.1  | 12.1  | 6.5   | 8.2   | 11.4  | 10.8  | 10.2  | 8.4   | 5.7   | 7.9   | 9.4   |
| Syt3      | 0.1   | 0.1   | 0.1   | 0.1   | 0.1   | 0.2   | 0.1   | 0.1   | 0.1   | 0.1   | 0.0   | 0.1   |
| Syt4      | 0.0   | 0.0   | 0.0   | 0.1   | 0.0   | 0.0   | 0.0   | 0.0   | 0.0   | 0.0   | 0.0   | 0.0   |
| Syt5      | 0.1   | 0.0   | 0.0   | 0.1   | 0.1   | 0.2   | 0.3   | 0.0   | 0.1   | 0.1   | 0.0   | 0.1   |

Online Table 1

|        |       |       |       |       |       |       |       |       |       |       |       |       |
|--------|-------|-------|-------|-------|-------|-------|-------|-------|-------|-------|-------|-------|
| Syt6   | 0.1   | 0.2   | 0.2   | 0.0   | 0.1   | 0.0   | 0.2   | 0.0   | 0.1   | 0.1   | 0.1   | 0.2   |
| Syt7   | 0.0   | 0.0   | 0.0   | 0.0   | 0.0   | 0.0   | 0.0   | 0.0   | 0.0   | 0.0   | 0.0   | 0.0   |
| Syt8   | 0.0   | 0.1   | 0.0   | 0.2   | 0.2   | 0.0   | 0.2   | 0.2   | 0.3   | 0.1   | 0.1   | 0.1   |
| Syt9   | 0.1   | 0.1   | 0.0   | 0.0   | 0.0   | 0.1   | 0.1   | 0.0   | 0.0   | 0.0   | 0.0   | 0.0   |
| Syt11  | 1.1   | 0.5   | 0.6   | 0.4   | 0.6   | 0.5   | 0.6   | 0.3   | 0.8   | 8.4   | 2.3   | 1.2   |
| Syt12  | 0.9   | 0.7   | 0.7   | 1.5   | 1.0   | 0.7   | 2.0   | 0.7   | 1.2   | 0.8   | 1.2   | 1.2   |
| Syt13  | 0.0   | 0.0   | 0.0   | 0.0   | 0.1   | 0.0   | 0.0   | 0.0   | 0.0   | 0.1   | 0.0   | 0.0   |
| Syt14  | 3.3   | 3.4   | 3.6   | 3.0   | 2.7   | 3.5   | 3.7   | 2.9   | 2.6   | 2.6   | 3.4   | 3.6   |
| Syt15  | 0.2   | 0.2   | 0.1   | 0.1   | 0.1   | 0.2   | 0.0   | 0.1   | 0.0   | 0.2   | 0.1   | 0.1   |
| Syvn1  | 3.0   | 5.1   | 4.1   | 3.3   | 4.4   | 3.9   | 4.8   | 4.2   | 5.2   | 4.5   | 4.2   | 3.2   |
| Szrd1  | 18.1  | 17.1  | 17.0  | 20.5  | 20.9  | 17.7  | 19.5  | 19.4  | 19.2  | 20.6  | 19.3  | 19.3  |
| Szt2   | 1.2   | 1.6   | 1.6   | 1.1   | 1.5   | 1.5   | 1.6   | 1.4   | 1.7   | 1.3   | 1.3   | 1.0   |
| T2     | 0.0   | 0.0   | 0.0   | 0.1   | 0.1   | 0.0   | 0.0   | 0.0   | 0.0   | 0.0   | 0.1   | 0.1   |
| Tab1   | 4.2   | 3.5   | 3.3   | 4.4   | 3.8   | 4.8   | 3.3   | 4.3   | 3.5   | 3.6   | 3.9   | 3.1   |
| Tab2   | 15.1  | 14.8  | 17.4  | 15.3  | 14.1  | 13.4  | 14.7  | 15.0  | 13.8  | 12.1  | 16.3  | 15.7  |
| Tab3   | 1.4   | 1.8   | 1.8   | 1.8   | 1.4   | 1.6   | 1.8   | 1.6   | 1.3   | 1.4   | 1.6   | 1.8   |
| Tac4   | 0.1   | 0.1   | 0.1   | 0.1   | 0.2   | 0.0   | 0.1   | 0.0   | 0.1   | 0.0   | 0.2   | 0.1   |
| Tacc1  | 18.6  | 23.9  | 28.2  | 22.4  | 27.4  | 19.7  | 25.8  | 24.7  | 24.6  | 21.4  | 22.1  | 27.7  |
| Tacc2  | 4.2   | 4.1   | 4.4   | 4.8   | 3.8   | 5.3   | 4.8   | 4.7   | 3.9   | 5.0   | 4.9   | 3.9   |
| Tacc3  | 3.8   | 6.0   | 8.9   | 2.0   | 9.0   | 2.1   | 11.1  | 4.0   | 8.9   | 4.3   | 7.0   | 4.9   |
| Taco1  | 4.7   | 5.7   | 5.4   | 5.3   | 4.6   | 6.2   | 4.9   | 4.9   | 4.1   | 4.4   | 4.9   | 5.0   |
| Tada1  | 6.8   | 6.6   | 6.7   | 6.7   | 6.2   | 6.2   | 6.9   | 7.2   | 7.1   | 6.8   | 7.4   | 7.6   |
| Tada2a | 4.7   | 4.7   | 5.7   | 3.6   | 3.9   | 4.4   | 4.4   | 5.2   | 4.3   | 5.0   | 5.3   | 5.2   |
| Tada2b | 3.8   | 3.6   | 4.1   | 4.4   | 4.1   | 4.1   | 4.6   | 4.1   | 4.0   | 3.8   | 4.8   | 4.2   |
| Tada3  | 8.9   | 11.3  | 11.2  | 9.5   | 11.0  | 10.7  | 12.9  | 11.5  | 11.0  | 10.2  | 12.9  | 10.8  |
| Taf1   | 10.7  | 10.7  | 11.5  | 10.4  | 9.2   | 10.0  | 10.9  | 9.3   | 9.2   | 9.6   | 11.4  | 10.6  |
| Taf10  | 74.4  | 65.8  | 60.9  | 69.2  | 64.2  | 63.3  | 68.1  | 76.8  | 63.1  | 68.2  | 64.6  | 65.8  |
| Taf11  | 13.8  | 14.8  | 14.2  | 13.0  | 13.5  | 16.2  | 14.9  | 16.2  | 14.2  | 14.3  | 15.2  | 14.8  |
| Taf12  | 18.7  | 18.0  | 19.3  | 21.1  | 18.4  | 18.1  | 21.1  | 20.4  | 17.8  | 19.2  | 23.7  | 20.5  |
| Taf13  | 26.4  | 22.6  | 19.6  | 26.8  | 22.5  | 20.6  | 20.3  | 17.3  | 19.3  | 24.4  | 25.5  | 25.2  |
| Taf15  | 7.0   | 7.4   | 8.2   | 7.9   | 8.3   | 7.1   | 7.4   | 8.3   | 6.8   | 7.6   | 7.9   | 8.8   |
| Taf1a  | 2.9   | 2.4   | 2.7   | 3.9   | 2.5   | 3.0   | 2.4   | 2.5   | 2.2   | 2.3   | 2.7   | 2.5   |
| Taf1b  | 7.4   | 6.3   | 6.7   | 7.2   | 5.5   | 6.5   | 6.6   | 6.2   | 5.7   | 4.7   | 6.4   | 6.3   |
| Taf1c  | 2.0   | 1.9   | 1.8   | 2.3   | 1.9   | 1.9   | 1.9   | 2.1   | 2.3   | 2.0   | 1.7   | 1.7   |
| Taf1d  | 15.4  | 14.0  | 17.3  | 12.1  | 15.5  | 13.5  | 17.3  | 15.9  | 13.2  | 17.0  | 18.5  | 16.8  |
| Taf2   | 8.6   | 9.6   | 9.1   | 8.4   | 9.0   | 8.4   | 8.5   | 8.9   | 8.7   | 8.8   | 9.9   | 8.8   |
| Taf3   | 1.6   | 1.6   | 2.2   | 2.4   | 1.7   | 2.1   | 1.6   | 2.0   | 1.2   | 1.5   | 1.9   | 1.5   |
| Taf4a  | 1.0   | 1.6   | 1.5   | 1.2   | 1.5   | 1.4   | 1.8   | 1.4   | 1.4   | 1.5   | 1.5   | 1.1   |
| Taf4b  | 1.6   | 1.6   | 1.2   | 1.5   | 1.4   | 1.6   | 1.4   | 1.3   | 1.3   | 1.5   | 1.7   | 1.3   |
| Taf5   | 1.3   | 1.4   | 1.3   | 1.2   | 1.2   | 1.2   | 1.6   | 1.4   | 1.4   | 1.6   | 1.4   | 1.4   |
| Taf5l  | 4.0   | 3.8   | 3.5   | 3.5   | 4.8   | 3.6   | 4.9   | 4.8   | 3.9   | 4.1   | 4.6   | 3.9   |
| Taf6   | 11.6  | 13.2  | 14.8  | 12.8  | 11.6  | 13.1  | 12.1  | 12.8  | 11.4  | 11.9  | 13.1  | 12.4  |
| Taf6l  | 2.2   | 2.5   | 2.7   | 2.9   | 2.6   | 2.5   | 3.4   | 2.8   | 2.0   | 2.3   | 2.4   | 2.3   |
| Taf7   | 1.4   | 1.4   | 1.9   | 1.4   | 1.6   | 1.2   | 1.9   | 1.9   | 2.1   | 2.7   | 2.3   | 2.6   |
| Taf7l  | 0.1   | 0.0   | 0.0   | 0.0   | 0.0   | 0.0   | 0.0   | 0.0   | 0.0   | 0.0   | 0.1   | 0.0   |
| Taf8   | 3.4   | 3.6   | 3.7   | 4.1   | 4.0   | 3.7   | 4.1   | 4.6   | 4.1   | 3.5   | 4.2   | 4.1   |
| Taf9   | 65.7  | 56.0  | 54.2  | 63.3  | 59.6  | 56.8  | 57.9  | 57.4  | 52.6  | 58.9  | 64.9  | 57.2  |
| Taf9b  | 3.5   | 5.2   | 6.8   | 4.4   | 5.1   | 3.4   | 5.4   | 6.0   | 5.0   | 4.8   | 5.8   | 6.1   |
| Tagap  | 3.1   | 3.0   | 2.6   | 2.5   | 2.8   | 3.0   | 3.1   | 2.1   | 2.4   | 2.1   | 2.2   | 2.0   |
| Tagap1 | 6.2   | 6.1   | 5.2   | 5.2   | 5.2   | 6.7   | 6.2   | 4.2   | 5.0   | 4.9   | 5.1   | 4.5   |
| Tagln  | 441.1 | 284.2 | 203.2 | 439.2 | 380.3 | 343.0 | 493.8 | 247.2 | 432.6 | 521.8 | 676.2 | 445.3 |
| Tagln2 | 61.0  | 45.9  | 41.0  | 81.1  | 127.3 | 58.6  | 108.9 | 58.2  | 69.7  | 70.5  | 62.2  | 61.6  |
| Tagln3 | 0.2   | 0.1   | 0.1   | 0.0   | 0.2   | 0.3   | 0.3   | 0.1   | 0.3   | 0.1   | 0.1   | 0.2   |
| Tal1   | 0.6   | 0.1   | 0.1   | 0.1   | 0.0   | 0.0   | 0.1   | 0.1   | 0.0   | 0.0   | 0.0   | 0.1   |
| Tal2   | 0.1   | 0.1   | 0.0   | 0.0   | 0.0   | 0.0   | 0.2   | 0.0   | 0.1   | 0.0   | 0.1   | 0.0   |
| Taldo1 | 195.1 | 174.9 | 95.4  | 321.5 | 216.5 | 313.4 | 97.3  | 99.7  | 70.7  | 117.4 | 101.9 | 87.7  |
| Tamm41 | 5.0   | 4.2   | 4.4   | 4.3   | 3.3   | 3.6   | 5.1   | 5.6   | 4.9   | 4.6   | 5.2   | 5.0   |

Online Table 1

|          |      |      |      |      |      |      |      |      |      |      |      |      |
|----------|------|------|------|------|------|------|------|------|------|------|------|------|
| Tanc1    | 8.2  | 7.2  | 6.6  | 8.7  | 7.3  | 8.4  | 8.0  | 7.5  | 7.2  | 10.0 | 10.1 | 8.7  |
| Tanc2    | 1.0  | 1.1  | 1.1  | 1.2  | 1.9  | 0.9  | 1.1  | 0.9  | 1.0  | 1.2  | 1.1  | 1.0  |
| Tango2   | 11.0 | 14.3 | 15.6 | 9.0  | 12.9 | 9.3  | 13.5 | 16.3 | 16.2 | 12.3 | 12.9 | 13.8 |
| Tango6   | 2.1  | 2.0  | 1.7  | 1.9  | 1.8  | 2.1  | 2.1  | 2.0  | 1.9  | 2.2  | 1.6  | 1.9  |
| Tank     | 18.2 | 19.1 | 19.1 | 21.2 | 25.0 | 15.2 | 21.4 | 17.7 | 18.1 | 19.8 | 23.0 | 21.8 |
| Taok1    | 15.2 | 17.5 | 18.0 | 15.5 | 16.1 | 15.1 | 14.5 | 15.4 | 14.8 | 15.5 | 17.4 | 17.2 |
| Taok2    | 11.4 | 12.2 | 13.7 | 12.8 | 12.1 | 11.6 | 14.3 | 13.6 | 13.0 | 11.7 | 12.6 | 13.0 |
| Taok3    | 7.5  | 6.7  | 7.3  | 10.6 | 10.3 | 8.3  | 7.8  | 6.2  | 5.7  | 8.0  | 8.0  | 8.3  |
| Tap1     | 12.0 | 12.3 | 11.1 | 10.7 | 11.1 | 10.5 | 8.8  | 7.7  | 8.4  | 8.6  | 7.4  | 10.3 |
| Tap2     | 11.5 | 13.6 | 13.6 | 12.6 | 14.9 | 14.6 | 12.0 | 13.1 | 12.6 | 10.7 | 8.8  | 12.0 |
| Tapbp    | 50.7 | 44.2 | 55.5 | 61.9 | 73.1 | 49.4 | 44.9 | 53.3 | 43.3 | 44.8 | 40.0 | 44.6 |
| Tapbpl   | 3.3  | 2.4  | 2.8  | 4.2  | 3.7  | 3.3  | 3.4  | 2.6  | 2.5  | 3.0  | 3.2  | 2.6  |
| Tap1     | 7.1  | 8.4  | 8.6  | 6.9  | 6.7  | 8.0  | 6.7  | 7.8  | 8.9  | 7.1  | 8.7  | 8.4  |
| Tarbp2   | 6.4  | 5.1  | 4.3  | 5.0  | 6.5  | 6.1  | 6.6  | 6.3  | 7.4  | 6.5  | 7.3  | 6.4  |
| Tardbp   | 12.9 | 13.6 | 12.2 | 13.6 | 14.9 | 11.7 | 13.4 | 13.3 | 13.7 | 13.6 | 14.7 | 14.0 |
| Tarm1    | 0.1  | 0.0  | 0.0  | 0.0  | 1.2  | 0.0  | 0.0  | 0.0  | 0.0  | 0.0  | 0.1  | 0.0  |
| Tars     | 52.3 | 42.8 | 39.1 | 52.3 | 42.1 | 47.8 | 51.8 | 55.9 | 43.7 | 44.0 | 60.5 | 48.9 |
| Tars2    | 9.4  | 8.7  | 7.7  | 9.8  | 7.9  | 9.7  | 8.7  | 7.7  | 7.5  | 7.9  | 7.5  | 7.3  |
| Tarsl2   | 3.9  | 3.5  | 2.7  | 3.5  | 2.4  | 4.5  | 2.5  | 2.0  | 2.6  | 2.5  | 3.0  | 3.2  |
| Tas1r1   | 0.1  | 0.1  | 0.1  | 0.1  | 0.1  | 0.2  | 0.1  | 0.1  | 0.0  | 0.3  | 0.1  | 0.1  |
| Tas1r3   | 0.1  | 0.2  | 0.2  | 0.2  | 0.4  | 0.3  | 0.2  | 0.2  | 0.3  | 0.3  | 0.2  | 0.2  |
| Tas2r108 | 0.1  | 0.1  | 0.0  | 0.0  | 0.0  | 0.1  | 0.0  | 0.0  | 0.1  | 0.1  | 0.0  | 0.1  |
| Tas2r135 | 0.0  | 0.0  | 0.1  | 0.0  | 0.0  | 0.0  | 0.0  | 0.0  | 0.0  | 0.0  | 0.0  | 0.0  |
| Tas2r137 | 0.0  | 0.2  | 0.0  | 0.0  | 0.1  | 0.1  | 0.1  | 0.0  | 0.0  | 0.0  | 0.1  | 0.0  |
| Tasp1    | 3.1  | 3.9  | 5.1  | 3.1  | 3.1  | 3.0  | 3.8  | 4.6  | 4.6  | 4.7  | 3.8  | 4.5  |
| Tatdn1   | 5.3  | 5.7  | 5.2  | 5.2  | 5.3  | 6.1  | 5.0  | 5.1  | 5.7  | 6.2  | 6.1  | 5.8  |
| Tatdn2   | 17.0 | 11.1 | 9.6  | 20.4 | 15.5 | 13.5 | 15.6 | 9.6  | 11.5 | 12.8 | 15.7 | 13.5 |
| Tatdn3   | 4.5  | 4.1  | 3.9  | 2.8  | 3.8  | 4.5  | 3.0  | 4.6  | 4.4  | 3.4  | 3.1  | 4.2  |
| Tax1bp1  | 76.6 | 76.9 | 76.0 | 74.9 | 69.2 | 72.8 | 73.0 | 71.0 | 65.7 | 79.3 | 84.4 | 87.9 |
| Tax1bp3  | 44.7 | 44.3 | 43.3 | 37.3 | 47.5 | 38.6 | 48.8 | 46.0 | 58.6 | 58.9 | 54.8 | 53.1 |
| Taz      | 12.6 | 12.4 | 11.5 | 10.5 | 11.1 | 13.8 | 9.3  | 9.1  | 14.1 | 11.3 | 10.8 | 11.4 |
| Tbata    | 0.0  | 0.1  | 0.0  | 0.0  | 0.1  | 0.2  | 0.1  | 0.0  | 0.0  | 0.1  | 0.0  | 0.0  |
| Tbc1d1   | 7.7  | 7.4  | 6.7  | 8.5  | 9.4  | 7.4  | 10.3 | 6.7  | 8.3  | 7.8  | 8.9  | 8.4  |
| Tbc1d10a | 17.2 | 16.7 | 12.9 | 13.7 | 18.0 | 15.4 | 19.5 | 15.3 | 19.9 | 20.8 | 18.3 | 16.6 |
| Tbc1d10b | 15.5 | 15.6 | 15.3 | 18.1 | 17.1 | 16.0 | 18.8 | 14.8 | 14.5 | 12.8 | 13.6 | 14.9 |
| Tbc1d10c | 0.1  | 0.1  | 0.1  | 0.1  | 0.1  | 0.2  | 0.1  | 0.1  | 0.0  | 0.1  | 0.1  | 0.1  |
| Tbc1d12  | 4.7  | 4.7  | 4.1  | 4.6  | 4.2  | 5.2  | 4.3  | 3.7  | 4.6  | 4.7  | 4.8  | 5.0  |
| Tbc1d13  | 12.5 | 11.8 | 11.6 | 13.6 | 13.7 | 11.7 | 12.5 | 12.9 | 11.8 | 12.3 | 11.9 | 11.7 |
| Tbc1d14  | 2.5  | 3.6  | 3.2  | 3.2  | 4.1  | 3.2  | 3.0  | 4.2  | 3.6  | 3.6  | 3.0  | 3.2  |
| Tbc1d15  | 6.5  | 7.0  | 7.8  | 8.3  | 8.8  | 8.8  | 7.0  | 6.9  | 6.8  | 9.1  | 8.9  | 9.6  |
| Tbc1d16  | 1.3  | 1.0  | 1.2  | 1.2  | 0.8  | 1.2  | 1.0  | 1.2  | 1.2  | 1.9  | 1.3  | 1.2  |
| Tbc1d17  | 14.9 | 12.1 | 10.9 | 16.7 | 12.4 | 15.4 | 14.2 | 13.2 | 12.7 | 12.8 | 12.1 | 12.8 |
| Tbc1d19  | 10.2 | 9.6  | 7.7  | 10.6 | 8.7  | 9.6  | 8.7  | 7.3  | 8.9  | 8.7  | 8.4  | 8.1  |
| Tbc1d2   | 2.3  | 1.2  | 0.8  | 1.1  | 1.1  | 1.5  | 0.9  | 0.5  | 0.5  | 2.5  | 1.4  | 1.0  |
| Tbc1d20  | 21.1 | 19.7 | 14.7 | 20.8 | 19.9 | 16.8 | 20.5 | 20.6 | 21.6 | 19.9 | 19.0 | 21.5 |
| Tbc1d22a | 10.1 | 8.7  | 7.1  | 10.2 | 9.5  | 11.5 | 8.4  | 8.9  | 9.2  | 9.1  | 9.3  | 8.1  |
| Tbc1d22b | 2.5  | 3.3  | 3.2  | 2.9  | 2.7  | 2.7  | 3.0  | 2.6  | 3.1  | 2.1  | 2.4  | 1.8  |
| Tbc1d23  | 16.3 | 19.9 | 18.4 | 18.1 | 16.2 | 16.7 | 16.7 | 13.6 | 17.6 | 16.0 | 17.2 | 19.1 |
| Tbc1d24  | 3.7  | 3.6  | 3.0  | 4.1  | 3.1  | 4.7  | 2.8  | 2.7  | 2.5  | 2.9  | 2.5  | 2.7  |
| Tbc1d25  | 1.7  | 1.6  | 1.5  | 1.8  | 2.1  | 1.1  | 1.8  | 1.9  | 1.7  | 1.5  | 1.7  | 1.4  |
| Tbc1d2b  | 11.7 | 12.5 | 14.6 | 10.4 | 11.7 | 11.7 | 11.7 | 11.6 | 11.0 | 15.4 | 13.7 | 13.1 |
| Tbc1d30  | 0.1  | 0.0  | 0.0  | 0.0  | 0.1  | 0.0  | 0.0  | 0.0  | 0.0  | 0.0  | 0.0  | 0.0  |
| Tbc1d4   | 0.8  | 1.0  | 1.9  | 0.6  | 1.7  | 0.7  | 1.8  | 1.9  | 1.4  | 1.1  | 1.4  | 1.1  |
| Tbc1d5   | 6.0  | 6.4  | 7.3  | 6.2  | 6.2  | 6.3  | 6.6  | 6.8  | 5.8  | 6.0  | 6.4  | 7.0  |
| Tbc1d7   | 10.8 | 12.2 | 10.5 | 10.7 | 8.6  | 11.3 | 11.0 | 10.5 | 10.1 | 8.2  | 10.1 | 10.0 |
| Tbc1d8   | 2.2  | 1.8  | 1.8  | 1.6  | 1.8  | 1.3  | 1.5  | 1.5  | 1.3  | 1.8  | 1.9  | 1.6  |
| Tbc1d8b  | 5.3  | 5.3  | 6.1  | 6.7  | 6.2  | 6.1  | 5.8  | 6.7  | 5.9  | 6.1  | 7.9  | 6.9  |

Online Table 1

|         |       |       |       |       |       |       |       |       |       |       |       |       |
|---------|-------|-------|-------|-------|-------|-------|-------|-------|-------|-------|-------|-------|
| Tbc1d9  | 1.7   | 0.6   | 0.5   | 3.6   | 4.4   | 2.0   | 1.3   | 0.7   | 0.8   | 0.8   | 0.9   | 0.7   |
| Tbc1d9b | 25.3  | 22.8  | 23.3  | 28.3  | 23.3  | 31.4  | 27.4  | 22.8  | 23.0  | 23.6  | 22.8  | 24.5  |
| Tbca    | 223.2 | 171.6 | 157.1 | 233.3 | 163.3 | 208.0 | 150.3 | 163.8 | 142.2 | 165.6 | 204.4 | 194.8 |
| Tbcb    | 41.6  | 40.5  | 34.9  | 42.9  | 38.2  | 40.0  | 39.2  | 47.1  | 41.9  | 41.9  | 45.5  | 40.7  |
| Tbcc    | 7.5   | 7.0   | 5.2   | 7.9   | 6.8   | 8.5   | 6.3   | 6.5   | 8.2   | 7.6   | 6.9   | 6.8   |
| Tbccd1  | 6.1   | 5.1   | 4.8   | 5.3   | 4.9   | 5.2   | 4.1   | 4.8   | 5.6   | 4.8   | 4.9   | 5.4   |
| Tbcd    | 22.6  | 19.1  | 16.4  | 24.6  | 19.3  | 21.6  | 17.4  | 19.2  | 17.4  | 16.2  | 17.5  | 16.8  |
| Tbce    | 12.6  | 11.8  | 10.3  | 11.9  | 11.5  | 10.9  | 12.5  | 11.0  | 12.6  | 10.0  | 12.4  | 11.2  |
| Tbcel   | 13.8  | 12.4  | 9.9   | 16.6  | 10.7  | 14.2  | 9.3   | 8.5   | 9.4   | 9.9   | 10.0  | 10.0  |
| Tbck    | 7.8   | 7.9   | 8.1   | 7.2   | 7.4   | 8.2   | 6.7   | 7.8   | 7.5   | 7.8   | 8.3   | 7.7   |
| Tbk1    | 15.3  | 16.8  | 17.4  | 18.9  | 19.5  | 16.7  | 16.4  | 15.6  | 16.2  | 16.4  | 18.0  | 18.2  |
| Tbkbp1  | 0.9   | 1.1   | 1.3   | 1.0   | 1.3   | 0.6   | 0.9   | 1.3   | 0.8   | 0.9   | 0.8   | 0.6   |
| Tbl1x   | 31.3  | 27.1  | 25.5  | 25.0  | 21.4  | 29.9  | 23.9  | 21.8  | 24.6  | 25.1  | 27.0  | 23.2  |
| Tbl1xr1 | 7.7   | 8.7   | 11.7  | 7.4   | 8.7   | 7.8   | 7.9   | 11.3  | 8.5   | 7.8   | 8.2   | 9.2   |
| Tbl2    | 3.4   | 4.4   | 6.2   | 3.8   | 4.5   | 3.7   | 5.7   | 7.0   | 5.6   | 4.4   | 4.5   | 4.7   |
| Tbl3    | 12.0  | 11.7  | 8.6   | 11.2  | 10.7  | 11.2  | 10.3  | 9.7   | 9.3   | 9.5   | 9.9   | 8.8   |
| Tbp     | 6.3   | 7.1   | 8.0   | 6.4   | 7.4   | 7.8   | 6.8   | 7.7   | 6.5   | 7.5   | 8.6   | 7.7   |
| Tbpl1   | 9.4   | 10.0  | 9.4   | 10.1  | 10.9  | 9.8   | 9.5   | 10.8  | 10.2  | 9.3   | 10.8  | 9.6   |
| Tbrg1   | 73.5  | 66.1  | 62.9  | 70.6  | 55.7  | 62.9  | 61.1  | 65.2  | 56.2  | 65.1  | 71.2  | 66.1  |
| Tbrg3   | 0.2   | 0.3   | 0.3   | 0.1   | 0.3   | 0.2   | 0.2   | 0.2   | 0.1   | 0.2   | 0.2   | 0.2   |
| Tbrg4   | 3.8   | 3.6   | 2.8   | 3.5   | 4.0   | 3.6   | 4.6   | 4.4   | 3.7   | 3.7   | 4.0   | 2.4   |
| Tbx1    | 0.0   | 0.0   | 0.0   | 0.0   | 0.0   | 0.0   | 0.0   | 0.0   | 0.0   | 0.0   | 0.0   | 0.0   |
| Tbx10   | 0.0   | 0.0   | 0.0   | 0.1   | 0.1   | 0.0   | 0.0   | 0.0   | 0.1   | 0.1   | 0.2   | 0.0   |
| Tbx15   | 1.6   | 0.6   | 0.5   | 2.3   | 0.8   | 1.3   | 1.0   | 0.4   | 0.4   | 0.4   | 0.7   | 0.5   |
| Tbx18   | 18.5  | 16.4  | 13.1  | 12.8  | 11.8  | 10.2  | 17.6  | 17.9  | 20.4  | 16.8  | 21.8  | 23.6  |
| Tbx2    | 1.0   | 1.3   | 1.2   | 0.7   | 0.9   | 0.8   | 0.9   | 0.9   | 0.9   | 1.5   | 0.8   | 1.0   |
| Tbx20   | 120.3 | 165.8 | 176.8 | 103.5 | 143.6 | 107.0 | 162.7 | 103.0 | 116.9 | 72.7  | 101.6 | 125.8 |
| Tbx3    | 0.2   | 0.1   | 0.1   | 0.1   | 0.1   | 0.1   | 0.2   | 0.1   | 0.2   | 0.7   | 0.5   | 0.3   |
| Tbx4    | 0.5   | 0.2   | 0.3   | 0.1   | 0.1   | 0.2   | 0.1   | 0.1   | 0.1   | 0.5   | 0.1   | 0.2   |
| Tbx5    | 0.7   | 0.3   | 0.4   | 0.0   | 0.0   | 0.1   | 0.1   | 0.3   | 0.1   | 0.6   | 0.5   | 0.6   |
| Tbx6    | 0.1   | 0.3   | 0.3   | 0.4   | 0.3   | 0.3   | 0.4   | 0.0   | 0.4   | 0.3   | 0.1   | 0.2   |
| Tbxa2r  | 3.6   | 5.7   | 5.7   | 2.5   | 4.2   | 3.3   | 7.6   | 10.8  | 10.9  | 5.9   | 6.4   | 6.2   |
| Tbxas1  | 0.6   | 0.0   | 0.0   | 4.8   | 7.4   | 0.1   | 0.9   | 0.1   | 0.0   | 0.7   | 0.2   | 0.4   |
| Tc2n    | 0.1   | 0.2   | 0.1   | 0.1   | 0.0   | 0.0   | 0.1   | 0.1   | 0.1   | 0.1   | 0.0   | 0.0   |
| Tcaim   | 2.1   | 2.5   | 2.3   | 2.9   | 2.2   | 2.6   | 2.5   | 2.1   | 2.8   | 2.8   | 3.3   | 3.3   |
| Tcam1   | 0.1   | 0.1   | 0.1   | 0.1   | 0.0   | 0.2   | 0.0   | 0.0   | 0.0   | 0.0   | 0.0   | 0.1   |
| Tcea1   | 27.1  | 27.4  | 25.8  | 27.9  | 25.0  | 30.2  | 24.7  | 27.3  | 24.7  | 29.1  | 33.2  | 28.4  |
| Tcea2   | 1.6   | 2.9   | 1.9   | 2.3   | 1.5   | 2.3   | 2.2   | 1.2   | 1.9   | 2.1   | 1.5   | 2.2   |
| Tcea3   | 23.5  | 22.3  | 28.5  | 21.2  | 13.6  | 28.5  | 17.5  | 20.3  | 16.7  | 19.8  | 20.2  | 24.8  |
| Tceal1  | 6.7   | 7.4   | 10.4  | 9.4   | 6.0   | 12.1  | 7.2   | 7.6   | 7.7   | 8.6   | 9.6   | 10.1  |
| Tceal3  | 0.8   | 0.5   | 1.2   | 0.4   | 0.2   | 0.8   | 0.3   | 0.4   | 0.3   | 1.8   | 1.5   | 1.2   |
| Tceal5  | 0.1   | 0.2   | 0.1   | 0.0   | 0.2   | 0.1   | 0.1   | 0.0   | 0.0   | 0.4   | 0.2   | 0.1   |
| Tceal6  | 0.1   | 0.1   | 0.1   | 0.0   | 0.1   | 0.0   | 0.1   | 0.0   | 0.0   | 0.3   | 0.1   | 0.1   |
| Tceal8  | 31.0  | 25.7  | 35.1  | 37.0  | 25.8  | 34.9  | 40.1  | 38.7  | 28.5  | 34.0  | 47.0  | 41.3  |
| Tceanc  | 1.4   | 2.7   | 3.2   | 1.1   | 1.3   | 1.2   | 1.4   | 1.8   | 1.6   | 1.5   | 1.2   | 1.5   |
| Tceanc2 | 3.5   | 2.8   | 2.7   | 3.4   | 3.0   | 3.3   | 2.7   | 2.7   | 2.7   | 2.9   | 3.0   | 3.1   |
| Tceb1   | 45.4  | 49.1  | 40.4  | 46.5  | 49.0  | 40.1  | 39.7  | 40.7  | 46.4  | 48.2  | 55.7  | 45.9  |
| Tceb2   | 355.5 | 325.5 | 263.7 | 346.3 | 308.4 | 361.3 | 306.9 | 328.1 | 360.6 | 326.3 | 338.3 | 307.9 |
| Tceb3   | 27.3  | 26.0  | 25.5  | 32.4  | 24.5  | 26.5  | 25.5  | 24.0  | 20.6  | 23.3  | 26.5  | 25.8  |
| Tcerg1  | 9.0   | 9.6   | 10.1  | 8.8   | 9.0   | 8.5   | 12.3  | 9.4   | 8.9   | 8.9   | 10.0  | 10.1  |
| Tcerg1l | 0.1   | 0.0   | 0.1   | 0.0   | 0.0   | 0.0   | 0.0   | 0.1   | 0.1   | 0.0   | 0.0   | 0.0   |
| Tcf12   | 20.6  | 21.5  | 22.3  | 19.2  | 17.7  | 19.1  | 19.5  | 22.1  | 20.0  | 18.3  | 20.8  | 18.2  |
| Tcf15   | 0.0   | 0.0   | 0.0   | 0.0   | 0.1   | 0.1   | 0.0   | 0.0   | 0.0   | 0.0   | 0.1   | 0.0   |
| Tcf19   | 3.8   | 5.4   | 7.9   | 2.5   | 7.7   | 2.1   | 8.9   | 5.7   | 5.6   | 4.2   | 5.5   | 3.7   |
| Tcf20   | 30.2  | 30.9  | 25.9  | 26.8  | 25.9  | 32.7  | 33.5  | 34.1  | 33.6  | 31.1  | 39.8  | 33.0  |
| Tcf21   | 80.6  | 164.9 | 230.5 | 63.2  | 120.0 | 61.9  | 106.6 | 129.4 | 104.0 | 70.7  | 67.6  | 111.5 |
| Tcf23   | 0.1   | 0.1   | 0.1   | 0.1   | 0.1   | 0.1   | 0.1   | 0.1   | 0.1   | 0.2   | 0.1   | 0.1   |

Online Table 1

|          |       |       |       |       |       |       |       |       |       |       |       |       |
|----------|-------|-------|-------|-------|-------|-------|-------|-------|-------|-------|-------|-------|
| Tcf25    | 111.0 | 105.5 | 103.9 | 119.9 | 100.8 | 113.4 | 122.3 | 107.0 | 110.3 | 93.4  | 114.5 | 107.9 |
| Tcf3     | 7.3   | 8.5   | 8.8   | 7.2   | 7.3   | 8.9   | 8.4   | 10.1  | 8.4   | 8.0   | 7.0   | 6.9   |
| Tcf4     | 9.0   | 12.4  | 16.0  | 12.4  | 11.5  | 11.0  | 12.3  | 15.9  | 12.3  | 10.5  | 11.1  | 11.7  |
| Tcf7     | 0.0   | 0.2   | 0.0   | 0.0   | 0.1   | 0.0   | 0.0   | 0.1   | 0.0   | 0.1   | 0.1   | 0.1   |
| Tcf7l1   | 0.6   | 1.0   | 1.5   | 0.6   | 0.9   | 0.7   | 0.9   | 1.4   | 1.2   | 0.9   | 1.0   | 0.6   |
| Tcf7l2   | 1.2   | 1.8   | 2.2   | 1.5   | 1.4   | 1.6   | 1.7   | 2.1   | 1.4   | 1.5   | 1.8   | 1.3   |
| Tcf15    | 0.5   | 0.1   | 0.3   | 0.5   | 0.3   | 0.4   | 0.5   | 0.2   | 0.4   | 0.7   | 1.0   | 0.7   |
| Tchh     | 0.2   | 0.1   | 0.1   | 0.3   | 0.1   | 0.3   | 0.2   | 0.1   | 0.2   | 0.4   | 0.2   | 0.2   |
| Tchp     | 3.0   | 2.3   | 2.8   | 2.3   | 2.6   | 3.2   | 3.0   | 2.6   | 2.2   | 2.6   | 3.1   | 2.6   |
| Tcirg1   | 11.5  | 10.1  | 9.1   | 18.6  | 25.1  | 7.9   | 12.9  | 8.4   | 12.6  | 10.1  | 8.1   | 9.7   |
| Tcn2     | 91.2  | 80.8  | 78.4  | 98.7  | 84.0  | 107.0 | 70.1  | 67.7  | 62.5  | 72.4  | 71.7  | 75.4  |
| Tcof1    | 3.7   | 4.1   | 4.6   | 3.6   | 5.1   | 3.4   | 5.2   | 4.8   | 4.1   | 3.3   | 4.2   | 3.9   |
| Tcp1     | 114.0 | 98.5  | 85.9  | 100.1 | 95.8  | 97.6  | 98.3  | 91.7  | 99.0  | 105.5 | 113.5 | 100.4 |
| Tcp10a   | 0.1   | 0.0   | 0.2   | 0.2   | 0.1   | 0.0   | 0.0   | 0.1   | 0.1   | 0.0   | 0.1   | 0.0   |
| Tcp10b   | 0.1   | 0.1   | 0.4   | 0.1   | 0.1   | 0.0   | 0.2   | 0.1   | 0.0   | 0.1   | 0.1   | 0.1   |
| Tcp10c   | 0.1   | 0.0   | 0.1   | 0.0   | 0.0   | 0.0   | 0.0   | 0.1   | 0.0   | 0.0   | 0.1   | 0.0   |
| Tcp11    | 0.1   | 0.0   | 0.0   | 0.0   | 0.0   | 0.0   | 0.0   | 0.0   | 0.0   | 0.0   | 0.0   | 0.0   |
| Tcp11l1  | 3.6   | 3.5   | 2.7   | 5.2   | 3.8   | 4.0   | 2.0   | 2.0   | 1.6   | 1.3   | 1.9   | 2.2   |
| Tcp11l2  | 4.7   | 7.3   | 6.6   | 5.0   | 5.0   | 4.8   | 5.1   | 5.5   | 5.7   | 8.9   | 6.4   | 8.0   |
| Tcta     | 22.8  | 20.9  | 16.2  | 24.4  | 19.9  | 24.4  | 23.3  | 22.0  | 26.9  | 23.4  | 23.1  | 21.5  |
| Tcte2    | 0.9   | 0.3   | 0.2   | 0.7   | 0.5   | 0.9   | 0.2   | 0.2   | 0.3   | 0.4   | 0.7   | 0.3   |
| Tcte3    | 0.1   | 0.0   | 0.2   | 0.1   | 0.1   | 0.1   | 0.2   | 0.2   | 0.1   | 0.2   | 0.1   | 0.0   |
| Tctex1d2 | 10.3  | 8.9   | 9.0   | 9.3   | 11.0  | 11.8  | 9.3   | 9.6   | 9.5   | 10.4  | 9.1   | 9.0   |
| Tctex1d4 | 0.4   | 0.3   | 0.1   | 0.8   | 0.3   | 0.3   | 0.3   | 0.1   | 0.1   | 0.4   | 0.1   | 0.3   |
| Tctn1    | 4.4   | 5.2   | 4.5   | 5.1   | 4.6   | 6.7   | 4.3   | 4.5   | 3.9   | 3.1   | 3.3   | 3.2   |
| Tctn2    | 3.9   | 3.9   | 4.1   | 4.6   | 3.3   | 5.5   | 3.4   | 4.2   | 3.1   | 4.3   | 3.9   | 3.7   |
| Tctn3    | 2.7   | 2.5   | 2.2   | 2.4   | 2.2   | 3.7   | 2.0   | 2.2   | 2.3   | 2.5   | 1.8   | 2.4   |
| Tdg      | 2.4   | 1.6   | 2.0   | 2.6   | 2.2   | 2.8   | 2.2   | 2.0   | 1.1   | 1.8   | 1.4   | 2.3   |
| Tdo2     | 0.0   | 0.0   | 0.0   | 0.0   | 0.0   | 0.0   | 0.1   | 0.1   | 0.0   | 0.0   | 0.0   | 0.0   |
| Tdp1     | 3.5   | 3.6   | 3.8   | 3.5   | 3.5   | 3.9   | 3.1   | 3.1   | 3.4   | 3.8   | 4.3   | 3.3   |
| Tdp2     | 8.8   | 11.2  | 10.5  | 6.7   | 9.9   | 7.8   | 10.2  | 8.7   | 11.7  | 11.1  | 11.5  | 11.7  |
| Tdrd1    | 0.2   | 0.2   | 0.1   | 0.2   | 0.2   | 0.4   | 0.2   | 0.1   | 0.1   | 0.1   | 0.3   | 0.1   |
| Tdrd12   | 0.0   | 0.0   | 0.0   | 0.0   | 0.0   | 0.0   | 0.0   | 0.0   | 0.1   | 0.1   | 0.0   | 0.0   |
| Tdrd3    | 14.0  | 13.5  | 14.2  | 14.9  | 10.2  | 14.2  | 10.6  | 12.3  | 10.6  | 10.3  | 13.1  | 13.1  |
| Tdrd5    | 0.0   | 0.0   | 0.0   | 0.0   | 0.1   | 0.1   | 0.0   | 0.0   | 0.0   | 0.0   | 0.0   | 0.0   |
| Tdrd6    | 0.0   | 0.0   | 0.0   | 0.0   | 0.0   | 0.0   | 0.0   | 0.0   | 0.0   | 0.0   | 0.0   | 0.0   |
| Tdrd7    | 25.3  | 19.5  | 16.8  | 26.9  | 19.1  | 26.8  | 17.4  | 13.7  | 16.1  | 15.7  | 18.2  | 20.4  |
| Tdrd9    | 0.0   | 0.0   | 0.0   | 0.0   | 0.1   | 0.0   | 0.0   | 0.0   | 0.0   | 0.0   | 0.0   | 0.0   |
| Tdrkh    | 0.6   | 0.5   | 0.3   | 0.7   | 0.4   | 1.0   | 0.6   | 0.1   | 0.2   | 1.0   | 0.5   | 0.4   |
| Tead1    | 9.4   | 12.4  | 11.8  | 10.1  | 9.2   | 9.6   | 13.3  | 10.5  | 11.8  | 9.6   | 10.6  | 10.5  |
| Tead2    | 12.4  | 13.9  | 14.4  | 9.2   | 8.7   | 12.6  | 14.1  | 15.6  | 14.6  | 11.1  | 11.8  | 11.6  |
| Tead3    | 5.5   | 6.6   | 7.7   | 5.2   | 5.6   | 5.5   | 8.3   | 7.6   | 9.0   | 6.6   | 6.7   | 6.8   |
| Tead4    | 0.7   | 0.3   | 0.2   | 0.5   | 0.4   | 0.3   | 0.6   | 0.4   | 0.4   | 0.6   | 0.6   | 0.4   |
| Tec      | 2.4   | 1.2   | 1.2   | 4.1   | 5.8   | 1.0   | 1.5   | 1.0   | 1.4   | 7.3   | 3.2   | 3.5   |
| Tecpr1   | 8.3   | 7.7   | 6.6   | 10.7  | 8.7   | 8.9   | 7.7   | 6.2   | 7.4   | 6.7   | 6.8   | 5.8   |
| Tecpr2   | 1.8   | 2.3   | 1.8   | 1.5   | 2.0   | 1.7   | 1.8   | 1.9   | 2.0   | 1.9   | 2.1   | 1.9   |
| Tecr     | 67.9  | 71.9  | 72.7  | 72.1  | 55.0  | 69.4  | 92.6  | 115.2 | 80.4  | 53.4  | 82.2  | 61.2  |
| Tecta    | 0.0   | 0.0   | 0.0   | 0.0   | 0.0   | 0.0   | 0.0   | 0.0   | 0.0   | 0.0   | 0.0   | 0.0   |
| Tectb    | 0.0   | 0.0   | 0.0   | 0.0   | 0.1   | 0.0   | 0.0   | 0.1   | 0.0   | 0.0   | 0.0   | 0.0   |
| Tef      | 20.7  | 23.4  | 24.1  | 18.4  | 16.3  | 22.0  | 17.2  | 22.2  | 19.4  | 17.2  | 15.7  | 17.4  |
| Tefm     | 5.2   | 5.5   | 4.6   | 5.9   | 4.5   | 5.9   | 5.4   | 4.5   | 5.3   | 5.6   | 5.4   | 5.4   |
| Tek      | 4.1   | 4.8   | 8.9   | 1.4   | 3.8   | 1.1   | 5.0   | 11.8  | 7.1   | 5.4   | 6.0   | 7.3   |
| Tekt2    | 0.3   | 0.2   | 0.5   | 0.4   | 0.3   | 0.4   | 0.5   | 0.4   | 0.5   | 0.6   | 0.3   | 0.2   |
| Tekt5    | 0.0   | 0.1   | 0.1   | 0.0   | 0.0   | 0.0   | 0.0   | 0.0   | 0.0   | 0.0   | 0.0   | 0.0   |
| Telo2    | 2.9   | 3.0   | 2.7   | 3.0   | 2.5   | 3.8   | 2.7   | 3.1   | 3.2   | 2.3   | 2.0   | 1.9   |
| Ten1     | 8.0   | 8.2   | 6.6   | 8.4   | 9.2   | 6.6   | 9.2   | 11.7  | 9.5   | 11.5  | 9.6   | 9.1   |
| Tenc1    | 6.9   | 7.8   | 7.6   | 8.9   | 6.1   | 9.0   | 7.8   | 8.8   | 8.1   | 5.9   | 6.4   | 6.1   |

Online Table 1

|         |      |      |      |      |      |       |      |      |      |      |      |      |
|---------|------|------|------|------|------|-------|------|------|------|------|------|------|
| Tenm1   | 0.0  | 0.0  | 0.0  | 0.0  | 0.0  | 0.0   | 0.0  | 0.0  | 0.0  | 0.0  | 0.0  | 0.0  |
| Tenm2   | 0.0  | 0.0  | 0.0  | 0.0  | 0.0  | 0.0   | 0.0  | 0.0  | 0.0  | 0.0  | 0.0  | 0.0  |
| Tenm3   | 1.6  | 3.2  | 5.2  | 1.0  | 3.6  | 0.7   | 4.4  | 8.0  | 7.3  | 4.9  | 4.2  | 4.4  |
| Tenm4   | 0.1  | 0.1  | 0.1  | 0.2  | 0.0  | 0.1   | 0.0  | 0.0  | 0.0  | 0.0  | 0.1  | 0.1  |
| Tep1    | 7.2  | 6.7  | 6.3  | 6.9  | 9.6  | 7.0   | 6.3  | 6.7  | 6.1  | 4.7  | 5.1  | 4.9  |
| Terc    | 6.1  | 4.4  | 2.9  | 3.3  | 4.4  | 5.5   | 3.2  | 3.1  | 3.5  | 7.3  | 2.9  | 4.4  |
| Terf1   | 4.6  | 6.6  | 7.2  | 5.2  | 5.8  | 6.1   | 7.4  | 5.2  | 5.5  | 4.8  | 5.4  | 6.1  |
| Terf2   | 5.7  | 5.6  | 6.0  | 5.1  | 5.1  | 5.6   | 5.8  | 5.7  | 5.1  | 5.6  | 5.8  | 5.1  |
| Terf2ip | 6.4  | 5.7  | 6.0  | 6.8  | 5.4  | 6.4   | 6.5  | 6.0  | 6.1  | 7.4  | 6.7  | 7.1  |
| Tert    | 1.2  | 1.9  | 1.7  | 0.9  | 1.2  | 1.7   | 1.2  | 1.2  | 1.3  | 1.5  | 1.2  | 1.1  |
| Tes     | 8.9  | 3.6  | 1.6  | 12.8 | 10.9 | 10.6  | 7.3  | 2.3  | 4.0  | 17.6 | 13.6 | 6.7  |
| Tesc    | 0.2  | 0.1  | 0.0  | 0.2  | 0.0  | 0.1   | 0.1  | 0.0  | 0.1  | 0.6  | 0.7  | 0.0  |
| Tesk1   | 6.6  | 6.4  | 5.3  | 7.2  | 6.5  | 7.5   | 7.6  | 6.2  | 6.7  | 7.2  | 6.7  | 5.7  |
| Tesk2   | 1.8  | 1.8  | 2.2  | 1.2  | 1.4  | 1.8   | 2.1  | 2.4  | 2.2  | 1.7  | 2.4  | 2.1  |
| Tet1    | 0.0  | 0.1  | 0.2  | 0.0  | 0.1  | 0.1   | 0.0  | 0.1  | 0.1  | 0.1  | 0.1  | 0.0  |
| Tet2    | 1.0  | 1.3  | 1.4  | 1.0  | 1.3  | 1.2   | 1.2  | 1.4  | 1.1  | 1.4  | 1.4  | 1.6  |
| Tet3    | 1.4  | 1.9  | 2.0  | 1.3  | 1.8  | 1.4   | 1.6  | 2.2  | 1.8  | 1.8  | 1.6  | 1.5  |
| Tex10   | 6.0  | 6.6  | 5.0  | 6.2  | 6.2  | 5.9   | 6.4  | 5.6  | 5.8  | 7.8  | 6.6  | 5.0  |
| Tex11   | 0.5  | 0.4  | 0.3  | 0.2  | 0.2  | 0.4   | 0.2  | 0.4  | 0.2  | 0.1  | 0.1  | 0.2  |
| Tex14   | 0.1  | 0.0  | 0.0  | 0.0  | 0.0  | 0.1   | 0.1  | 0.0  | 0.0  | 0.0  | 0.0  | 0.1  |
| Tex15   | 0.4  | 0.5  | 0.5  | 0.2  | 0.4  | 0.3   | 0.3  | 0.1  | 0.2  | 0.4  | 0.6  | 0.4  |
| Tex19.1 | 0.0  | 0.0  | 0.0  | 0.1  | 0.0  | 0.0   | 0.0  | 0.0  | 0.0  | 0.0  | 0.0  | 0.0  |
| Tex2    | 14.8 | 15.4 | 12.4 | 16.4 | 13.3 | 14.4  | 12.3 | 9.8  | 10.4 | 12.1 | 12.7 | 11.8 |
| Tex22   | 0.2  | 0.1  | 0.1  | 0.0  | 0.1  | 0.2   | 0.2  | 0.0  | 0.1  | 0.1  | 0.1  | 0.0  |
| Tex26   | 0.0  | 0.1  | 0.2  | 0.1  | 0.1  | 0.3   | 0.1  | 0.2  | 0.1  | 0.2  | 0.0  | 0.1  |
| Tex261  | 32.2 | 29.4 | 26.8 | 36.4 | 29.4 | 34.1  | 30.9 | 27.5 | 26.1 | 26.4 | 25.7 | 23.9 |
| Tex264  | 49.9 | 38.1 | 33.2 | 62.4 | 39.9 | 57.8  | 49.1 | 40.1 | 44.7 | 47.4 | 45.2 | 44.7 |
| Tex30   | 1.4  | 2.3  | 2.1  | 1.3  | 3.0  | 1.2   | 1.8  | 1.8  | 2.6  | 2.8  | 3.6  | 2.1  |
| Tex35   | 0.0  | 0.0  | 0.0  | 0.1  | 0.0  | 0.0   | 0.0  | 0.1  | 0.1  | 0.0  | 0.0  | 0.1  |
| Tex38   | 0.0  | 0.1  | 0.0  | 0.1  | 0.0  | 0.2   | 0.0  | 0.0  | 0.0  | 0.0  | 0.0  | 0.1  |
| Tex9    | 1.1  | 1.0  | 1.4  | 1.0  | 0.8  | 1.1   | 1.2  | 1.0  | 0.9  | 0.7  | 1.2  | 0.9  |
| Tfam    | 6.5  | 6.7  | 6.0  | 5.6  | 5.7  | 5.9   | 5.6  | 5.5  | 5.5  | 6.3  | 6.2  | 6.2  |
| Tfap2a  | 0.0  | 0.0  | 0.0  | 0.0  | 0.0  | 0.1   | 0.0  | 0.0  | 0.0  | 0.0  | 0.0  | 0.0  |
| Tfap2e  | 0.0  | 0.1  | 0.0  | 0.1  | 0.0  | 0.0   | 0.0  | 0.0  | 0.0  | 0.0  | 0.1  | 0.0  |
| Tfap4   | 0.5  | 0.8  | 0.7  | 1.0  | 0.8  | 1.0   | 0.7  | 0.6  | 0.5  | 0.7  | 0.4  | 0.6  |
| Tfb1m   | 3.4  | 3.2  | 2.5  | 3.2  | 2.7  | 3.9   | 2.4  | 2.6  | 3.7  | 2.7  | 3.0  | 2.3  |
| Tfb2m   | 10.2 | 10.5 | 9.4  | 11.6 | 10.4 | 11.4  | 11.1 | 11.0 | 10.2 | 12.4 | 12.7 | 13.6 |
| Tfcp2   | 4.6  | 4.9  | 4.9  | 4.1  | 4.3  | 4.6   | 4.3  | 4.5  | 4.0  | 4.6  | 4.6  | 4.4  |
| Tfcp211 | 0.8  | 0.5  | 0.3  | 0.5  | 0.5  | 0.4   | 0.3  | 0.4  | 0.3  | 0.9  | 0.9  | 0.4  |
| Tfdp1   | 37.3 | 41.0 | 44.8 | 36.3 | 39.0 | 35.8  | 46.6 | 37.2 | 36.0 | 35.6 | 43.6 | 38.8 |
| Tfdp2   | 10.1 | 9.6  | 8.0  | 9.5  | 7.0  | 8.5   | 8.0  | 6.9  | 7.4  | 7.6  | 9.0  | 8.1  |
| Tfe3    | 9.3  | 10.2 | 10.6 | 10.5 | 11.5 | 9.4   | 12.2 | 12.9 | 10.5 | 10.5 | 10.2 | 10.0 |
| Tfeb    | 2.8  | 3.6  | 3.3  | 2.0  | 3.2  | 2.4   | 3.7  | 3.6  | 3.6  | 4.1  | 3.2  | 3.6  |
| Tfec    | 3.5  | 1.1  | 0.5  | 11.2 | 4.1  | 5.3   | 1.5  | 0.6  | 0.4  | 0.5  | 0.6  | 0.6  |
| Tfg     | 32.0 | 37.0 | 35.8 | 35.8 | 33.6 | 31.7  | 40.7 | 44.1 | 38.6 | 35.5 | 43.5 | 40.6 |
| Tfip11  | 8.0  | 10.0 | 9.7  | 9.2  | 9.6  | 9.2   | 11.3 | 10.2 | 8.8  | 9.5  | 9.0  | 8.8  |
| Tfpi    | 68.0 | 67.3 | 56.8 | 87.3 | 63.6 | 104.6 | 67.4 | 50.3 | 63.1 | 72.2 | 73.7 | 71.8 |
| Tfpi2   | 3.4  | 3.3  | 3.4  | 3.0  | 3.8  | 3.5   | 2.8  | 2.2  | 1.9  | 1.8  | 2.4  | 2.4  |
| Tfpt    | 10.4 | 8.5  | 7.6  | 12.0 | 8.5  | 9.1   | 8.5  | 8.5  | 7.6  | 8.9  | 9.7  | 9.0  |
| Tfr2    | 0.2  | 0.2  | 0.2  | 0.3  | 0.2  | 0.2   | 0.3  | 0.2  | 0.5  | 0.6  | 0.5  | 0.4  |
| Tfrc    | 6.4  | 6.3  | 3.9  | 9.5  | 7.5  | 8.2   | 3.9  | 5.0  | 3.3  | 4.9  | 5.3  | 4.1  |
| Tg      | 2.1  | 1.6  | 0.9  | 2.5  | 2.5  | 1.3   | 3.0  | 3.3  | 3.4  | 1.2  | 2.0  | 1.5  |
| Tgds    | 8.4  | 9.2  | 8.0  | 6.8  | 9.2  | 8.3   | 8.2  | 9.0  | 10.0 | 9.4  | 10.0 | 9.1  |
| Tgfa    | 1.6  | 2.0  | 1.6  | 1.3  | 1.1  | 1.6   | 0.7  | 1.2  | 0.7  | 0.7  | 0.9  | 0.7  |
| Tgfb1   | 1.3  | 1.5  | 1.4  | 2.9  | 4.4  | 2.3   | 2.0  | 2.3  | 1.8  | 2.5  | 1.6  | 2.0  |
| Tgfb1i1 | 7.5  | 7.5  | 7.8  | 10.1 | 10.3 | 7.7   | 17.1 | 11.4 | 14.2 | 8.0  | 13.6 | 9.1  |
| Tgfb2   | 14.3 | 13.5 | 16.6 | 14.9 | 11.7 | 10.1  | 9.1  | 10.9 | 10.0 | 7.8  | 8.7  | 11.8 |

Online Table 1

|          |       |       |       |       |       |       |       |       |        |       |        |        |
|----------|-------|-------|-------|-------|-------|-------|-------|-------|--------|-------|--------|--------|
| Tgfb3    | 40.3  | 39.3  | 41.8  | 37.1  | 28.8  | 32.6  | 38.6  | 41.9  | 40.9   | 49.5  | 56.9   | 48.4   |
| Tgfbi    | 1.0   | 0.2   | 0.8   | 4.8   | 20.6  | 0.1   | 4.7   | 1.6   | 0.7    | 1.3   | 0.6    | 0.8    |
| Tgfbr1   | 8.1   | 8.1   | 8.4   | 11.0  | 13.4  | 7.3   | 5.9   | 5.3   | 6.3    | 10.5  | 8.8    | 8.9    |
| Tgfbr2   | 24.8  | 23.5  | 25.9  | 25.2  | 27.9  | 21.1  | 26.1  | 27.1  | 25.7   | 30.4  | 24.4   | 26.7   |
| Tgfbr3   | 5.5   | 6.9   | 11.4  | 4.0   | 5.8   | 5.8   | 6.6   | 6.9   | 5.7    | 8.7   | 6.3    | 6.7    |
| Tgfbrap1 | 5.4   | 5.3   | 4.5   | 5.8   | 4.9   | 5.8   | 5.5   | 4.9   | 4.9    | 4.0   | 4.8    | 4.3    |
| Tgif1    | 23.2  | 21.2  | 20.0  | 29.0  | 29.5  | 28.2  | 25.3  | 29.6  | 21.5   | 23.9  | 22.8   | 21.7   |
| Tgif2    | 0.9   | 1.2   | 1.1   | 0.8   | 1.0   | 0.7   | 1.1   | 1.2   | 1.1    | 1.1   | 1.1    | 1.0    |
| Tgm1     | 0.0   | 0.0   | 0.1   | 0.0   | 0.0   | 0.0   | 0.1   | 0.2   | 0.0    | 0.0   | 0.1    | 0.1    |
| Tgm2     | 22.3  | 14.1  | 11.6  | 25.9  | 16.2  | 19.9  | 18.0  | 16.3  | 27.7   | 28.3  | 23.1   | 23.8   |
| Tgm3     | 0.0   | 0.0   | 0.0   | 0.0   | 0.0   | 0.0   | 0.0   | 0.0   | 0.0    | 0.0   | 0.0    | 0.0    |
| Tgm4     | 2.9   | 2.6   | 1.8   | 2.2   | 2.3   | 2.6   | 1.9   | 1.8   | 2.0    | 1.7   | 1.9    | 1.7    |
| Tgoln1   | 61.3  | 51.7  | 43.1  | 76.5  | 56.5  | 64.6  | 43.7  | 37.6  | 36.0   | 44.4  | 42.8   | 45.2   |
| Tgoln2   | 72.2  | 53.8  | 49.5  | 76.7  | 55.0  | 63.5  | 47.6  | 37.2  | 37.3   | 47.6  | 45.2   | 52.3   |
| Tgs1     | 4.1   | 4.7   | 4.9   | 3.9   | 4.9   | 4.3   | 4.3   | 4.1   | 4.0    | 5.0   | 4.7    | 4.6    |
| Tgtp1    | 1.7   | 0.9   | 1.2   | 1.4   | 1.7   | 0.7   | 0.8   | 0.3   | 0.6    | 4.9   | 1.4    | 2.4    |
| Tgtp2    | 1.7   | 1.1   | 1.6   | 1.8   | 2.1   | 1.1   | 1.0   | 0.4   | 0.8    | 4.0   | 1.6    | 2.6    |
| Tha1     | 0.3   | 0.3   | 0.7   | 0.3   | 0.6   | 0.6   | 0.5   | 0.8   | 0.9    | 0.7   | 0.4    | 1.2    |
| Thada    | 2.8   | 2.9   | 2.9   | 2.8   | 3.0   | 2.6   | 2.8   | 2.8   | 2.5    | 3.1   | 2.9    | 2.6    |
| Thap1    | 3.2   | 3.6   | 3.4   | 3.0   | 3.3   | 3.0   | 3.4   | 2.9   | 2.7    | 3.4   | 3.9    | 3.6    |
| Thap11   | 10.9  | 12.3  | 9.7   | 8.8   | 10.6  | 11.8  | 9.6   | 12.9  | 11.8   | 12.8  | 10.3   | 10.3   |
| Thap2    | 1.5   | 2.0   | 1.9   | 1.4   | 1.9   | 1.9   | 2.1   | 2.2   | 2.1    | 2.0   | 2.1    | 1.9    |
| Thap3    | 5.5   | 5.4   | 4.7   | 5.0   | 4.6   | 7.0   | 5.1   | 5.7   | 5.6    | 7.3   | 4.4    | 4.6    |
| Thap4    | 15.2  | 15.3  | 12.3  | 13.1  | 11.6  | 14.6  | 13.5  | 11.3  | 11.4   | 13.7  | 13.1   | 11.9   |
| Thap6    | 2.2   | 2.0   | 2.0   | 2.1   | 2.1   | 1.9   | 1.6   | 2.1   | 1.8    | 2.0   | 2.3    | 1.7    |
| Thap7    | 10.9  | 9.3   | 10.3  | 13.5  | 10.8  | 14.0  | 13.8  | 13.0  | 12.1   | 12.8  | 11.5   | 11.5   |
| Thbd     | 11.5  | 5.6   | 4.1   | 11.0  | 4.4   | 12.2  | 8.1   | 8.6   | 17.2   | 30.1  | 20.7   | 17.7   |
| Thbs1    | 523.6 | 267.1 | 244.0 | 530.5 | 459.5 | 379.5 | 844.4 | 282.6 | 1068.5 | 988.7 | 1078.9 | 1279.1 |
| Thbs2    | 53.1  | 106.5 | 137.9 | 43.8  | 86.5  | 36.6  | 76.2  | 106.9 | 113.5  | 101.7 | 74.9   | 122.6  |
| Thbs3    | 0.9   | 1.9   | 2.9   | 0.8   | 1.6   | 0.9   | 2.3   | 3.8   | 2.7    | 1.4   | 2.0    | 1.9    |
| Thbs4    | 0.0   | 0.0   | 0.1   | 0.0   | 0.0   | 0.0   | 0.0   | 0.2   | 0.0    | 0.0   | 0.0    | 0.0    |
| Them4    | 4.1   | 4.0   | 3.6   | 4.5   | 3.0   | 4.9   | 3.3   | 3.6   | 4.1    | 3.3   | 5.0    | 3.5    |
| Them6    | 0.6   | 0.6   | 0.8   | 0.6   | 0.8   | 0.5   | 0.7   | 0.9   | 1.0    | 0.5   | 0.4    | 0.7    |
| Themis   | 0.0   | 0.0   | 0.0   | 0.0   | 0.0   | 0.0   | 0.0   | 0.0   | 0.0    | 0.0   | 0.0    | 0.0    |
| Themis2  | 0.1   | 0.0   | 0.0   | 1.5   | 2.8   | 0.0   | 0.3   | 0.1   | 0.1    | 0.2   | 0.0    | 0.1    |
| Thg1l    | 6.7   | 4.4   | 6.5   | 7.3   | 5.8   | 5.5   | 8.8   | 6.9   | 5.0    | 6.5   | 7.2    | 8.4    |
| Thnsl1   | 2.5   | 2.2   | 2.1   | 2.4   | 2.0   | 3.1   | 1.3   | 1.7   | 2.2    | 2.1   | 2.0    | 2.0    |
| Thnsl2   | 8.1   | 10.5  | 8.9   | 7.6   | 6.4   | 8.5   | 10.4  | 9.8   | 11.4   | 7.9   | 9.2    | 9.8    |
| Thoc1    | 9.3   | 9.0   | 8.9   | 9.8   | 8.1   | 7.7   | 8.1   | 8.5   | 8.4    | 8.0   | 9.2    | 9.7    |
| Thoc2    | 7.5   | 8.6   | 10.6  | 10.0  | 8.2   | 8.5   | 7.9   | 8.8   | 7.7    | 8.8   | 10.6   | 10.5   |
| Thoc3    | 9.5   | 8.3   | 8.4   | 9.6   | 7.8   | 7.9   | 9.4   | 8.2   | 8.5    | 9.9   | 10.1   | 8.0    |
| Thoc5    | 17.4  | 15.0  | 14.1  | 17.3  | 14.5  | 16.8  | 15.5  | 15.3  | 13.5   | 13.1  | 14.4   | 14.6   |
| Thoc6    | 6.9   | 7.3   | 5.7   | 6.9   | 6.9   | 6.0   | 5.8   | 7.4   | 7.6    | 7.1   | 5.9    | 6.4    |
| Thoc7    | 57.5  | 51.8  | 42.1  | 46.9  | 41.0  | 49.7  | 45.9  | 42.4  | 43.8   | 50.9  | 52.5   | 51.0   |
| Thop1    | 9.1   | 8.7   | 7.8   | 7.4   | 7.9   | 10.7  | 9.1   | 10.1  | 7.5    | 8.3   | 8.4    | 7.2    |
| Thpo     | 0.3   | 0.2   | 0.2   | 0.2   | 0.0   | 0.1   | 0.2   | 0.3   | 0.2    | 0.1   | 0.1    | 0.1    |
| Thra     | 9.2   | 12.0  | 14.4  | 8.6   | 7.3   | 12.0  | 10.0  | 13.1  | 11.2   | 10.3  | 10.1   | 10.0   |
| Thrap3   | 33.3  | 30.3  | 38.0  | 36.1  | 29.3  | 31.4  | 38.1  | 38.7  | 30.1   | 30.8  | 37.6   | 41.3   |
| Thrb     | 1.5   | 2.1   | 2.2   | 2.3   | 1.5   | 2.8   | 1.0   | 1.1   | 1.0    | 1.8   | 1.7    | 1.5    |
| Thrsp    | 0.1   | 0.0   | 0.1   | 0.0   | 0.0   | 0.2   | 0.1   | 0.1   | 0.0    | 0.0   | 0.1    | 0.0    |
| Thsd1    | 0.3   | 0.3   | 0.5   | 0.3   | 0.4   | 0.2   | 0.3   | 0.5   | 0.3    | 0.4   | 0.2    | 0.3    |
| Thsd4    | 0.1   | 0.1   | 0.0   | 0.1   | 0.0   | 0.1   | 0.1   | 0.1   | 0.1    | 0.5   | 0.2    | 0.1    |
| Thsd7a   | 7.1   | 9.4   | 14.0  | 8.5   | 8.9   | 10.0  | 11.4  | 16.3  | 12.0   | 5.8   | 8.2    | 10.7   |
| Thsd7b   | 0.8   | 1.5   | 2.1   | 0.5   | 0.6   | 0.3   | 0.4   | 1.1   | 0.3    | 0.3   | 0.5    | 0.4    |
| Thtpa    | 4.2   | 3.5   | 3.7   | 4.1   | 3.1   | 4.4   | 3.2   | 4.5   | 3.7    | 4.3   | 3.9    | 4.0    |
| Thumpd1  | 15.4  | 14.5  | 13.2  | 16.1  | 13.6  | 15.3  | 14.2  | 13.7  | 13.1   | 14.8  | 14.6   | 14.1   |
| Thumpd2  | 4.0   | 3.8   | 4.6   | 2.7   | 3.5   | 2.8   | 3.4   | 3.4   | 3.5    | 4.7   | 3.8    | 4.4    |

Online Table 1



|          |       |       |        |       |       |       |        |        |        |        |        |        |
|----------|-------|-------|--------|-------|-------|-------|--------|--------|--------|--------|--------|--------|
| Thumpd3  | 14.7  | 13.7  | 11.9   | 15.5  | 13.8  | 16.7  | 12.4   | 10.3   | 10.3   | 13.7   | 14.6   | 15.8   |
| Thy1     | 11.2  | 11.8  | 14.1   | 4.9   | 7.2   | 17.4  | 6.2    | 9.2    | 5.4    | 15.1   | 18.6   | 10.5   |
| Thyn1    | 41.5  | 37.9  | 34.0   | 37.8  | 31.1  | 38.0  | 29.5   | 23.7   | 26.8   | 36.5   | 35.1   | 30.7   |
| Tia1     | 4.7   | 4.8   | 4.9    | 5.6   | 4.5   | 5.2   | 4.6    | 4.8    | 5.0    | 4.9    | 5.5    | 4.9    |
| Tial1    | 3.4   | 3.6   | 4.0    | 3.4   | 4.3   | 3.8   | 4.9    | 4.6    | 4.7    | 4.4    | 4.5    | 4.3    |
| Tiam1    | 12.1  | 17.8  | 26.1   | 6.9   | 15.9  | 6.6   | 20.3   | 25.4   | 21.2   | 13.7   | 17.1   | 20.3   |
| Tiam2    | 0.7   | 0.7   | 0.7    | 0.4   | 0.7   | 0.7   | 0.7    | 0.7    | 0.6    | 0.6    | 0.9    | 0.5    |
| Ticam1   | 3.8   | 4.2   | 4.3    | 3.8   | 4.5   | 3.5   | 4.2    | 4.1    | 3.4    | 3.8    | 4.0    | 3.8    |
| Ticam2   | 0.1   | 0.0   | 0.0    | 0.3   | 0.4   | 0.0   | 0.1    | 0.0    | 0.0    | 0.1    | 0.1    | 0.1    |
| Ticrr    | 0.1   | 0.3   | 0.4    | 0.0   | 0.3   | 0.1   | 0.4    | 0.2    | 0.3    | 0.2    | 0.3    | 0.2    |
| Tie1     | 0.5   | 0.1   | 0.2    | 0.3   | 0.2   | 0.1   | 0.4    | 0.7    | 0.5    | 0.1    | 0.0    | 0.1    |
| Tifa     | 6.0   | 9.7   | 11.8   | 6.3   | 10.9  | 4.8   | 6.3    | 6.4    | 7.1    | 6.2    | 6.1    | 8.8    |
| Tifab    | 0.1   | 0.0   | 0.0    | 0.5   | 1.4   | 0.0   | 0.2    | 0.0    | 0.0    | 0.0    | 0.0    | 0.0    |
| Tigd2    | 4.9   | 5.7   | 5.4    | 5.8   | 5.1   | 5.0   | 4.7    | 4.3    | 4.8    | 4.4    | 5.3    | 5.1    |
| Tigd3    | 0.1   | 0.1   | 0.1    | 0.0   | 0.1   | 0.1   | 0.1    | 0.1    | 0.1    | 0.2    | 0.1    | 0.1    |
| Tigd4    | 0.0   | 0.1   | 0.0    | 0.0   | 0.0   | 0.0   | 0.0    | 0.0    | 0.0    | 0.1    | 0.0    | 0.0    |
| Tigd5    | 0.9   | 1.1   | 0.9    | 1.0   | 1.0   | 0.8   | 1.0    | 1.0    | 1.0    | 1.0    | 0.7    | 0.8    |
| Tigit    | 0.0   | 0.0   | 0.0    | 0.3   | 0.0   | 0.0   | 0.1    | 0.0    | 0.0    | 0.0    | 0.1    | 0.0    |
| Timeless | 0.8   | 1.3   | 2.2    | 0.8   | 1.6   | 0.3   | 1.9    | 1.7    | 1.3    | 0.8    | 1.2    | 1.0    |
| Timm10   | 12.9  | 8.3   | 7.4    | 10.6  | 9.9   | 11.2  | 10.9   | 10.4   | 8.3    | 11.4   | 9.6    | 10.2   |
| Timm10b  | 17.8  | 16.8  | 13.7   | 20.3  | 19.0  | 14.0  | 16.7   | 18.4   | 18.2   | 16.2   | 17.4   | 13.3   |
| Timm13   | 18.2  | 15.1  | 12.6   | 17.5  | 17.7  | 18.2  | 18.0   | 16.7   | 16.9   | 18.9   | 18.2   | 13.5   |
| Timm17a  | 77.9  | 67.9  | 66.8   | 81.9  | 72.3  | 74.3  | 81.4   | 64.8   | 72.5   | 78.1   | 83.6   | 82.8   |
| Timm17b  | 9.5   | 10.3  | 8.4    | 8.3   | 8.5   | 7.7   | 9.3    | 10.7   | 10.2   | 10.8   | 9.3    | 10.6   |
| Timm21   | 15.3  | 13.0  | 15.6   | 14.2  | 11.6  | 18.0  | 12.5   | 14.3   | 14.2   | 13.8   | 15.9   | 15.6   |
| Timm22   | 7.9   | 7.4   | 6.0    | 8.0   | 7.3   | 7.7   | 7.2    | 6.8    | 7.6    | 8.6    | 7.3    | 7.4    |
| Timm23   | 88.1  | 75.7  | 72.1   | 89.5  | 72.5  | 78.1  | 72.9   | 67.0   | 63.4   | 64.6   | 69.2   | 70.9   |
| Timm44   | 18.9  | 17.6  | 17.1   | 17.1  | 15.0  | 16.4  | 15.2   | 14.3   | 15.6   | 16.4   | 16.8   | 15.7   |
| Timm50   | 13.7  | 13.4  | 10.7   | 14.3  | 13.2  | 13.8  | 13.3   | 11.8   | 13.1   | 13.3   | 11.9   | 10.8   |
| Timm8a1  | 10.0  | 6.8   | 6.1    | 10.7  | 9.8   | 7.8   | 7.1    | 7.9    | 6.8    | 9.2    | 7.3    | 7.3    |
| Timm8b   | 91.0  | 69.8  | 65.7   | 100.4 | 71.1  | 84.9  | 55.5   | 67.6   | 55.4   | 83.8   | 88.9   | 79.4   |
| Timm9    | 9.2   | 7.6   | 6.1    | 7.8   | 8.6   | 7.2   | 8.1    | 6.9    | 8.1    | 8.6    | 8.7    | 6.9    |
| Timmdc1  | 17.8  | 16.6  | 15.0   | 17.8  | 13.9  | 18.8  | 16.2   | 14.9   | 13.7   | 16.6   | 17.2   | 16.7   |
| Timp1    | 487.0 | 394.3 | 441.0  | 349.8 | 508.2 | 344.9 | 857.5  | 498.7  | 503.2  | 772.2  | 649.1  | 823.3  |
| Timp2    | 310.8 | 182.0 | 156.2  | 326.7 | 200.0 | 333.8 | 218.1  | 174.6  | 166.1  | 266.8  | 238.5  | 233.1  |
| Timp3    | 794.7 | 771.6 | 1044.6 | 487.0 | 729.1 | 418.2 | 1136.4 | 1325.8 | 1241.5 | 1141.2 | 1211.1 | 1457.6 |
| Timp4    | 0.1   | 0.0   | 0.1    | 0.0   | 0.0   | 0.1   | 0.0    | 0.0    | 0.0    | 0.0    | 0.0    | 0.0    |
| Tinagl1  | 78.8  | 29.3  | 13.2   | 25.5  | 12.1  | 23.2  | 18.6   | 17.5   | 26.2   | 106.6  | 73.3   | 55.0   |
| Tinf2    | 3.6   | 5.1   | 5.9    | 2.5   | 4.8   | 3.4   | 5.2    | 5.0    | 5.4    | 4.7    | 4.2    | 3.7    |
| Tiparp   | 6.0   | 6.7   | 6.1    | 5.2   | 6.0   | 4.8   | 5.9    | 8.0    | 9.1    | 10.4   | 9.1    | 9.0    |
| Tipin    | 15.0  | 19.6  | 22.2   | 14.9  | 17.7  | 14.5  | 21.4   | 15.9   | 16.4   | 14.7   | 20.4   | 18.7   |
| Tiprl    | 8.2   | 8.5   | 7.6    | 8.0   | 8.1   | 7.4   | 8.6    | 7.1    | 8.3    | 8.1    | 8.6    | 8.6    |
| Tirap    | 3.0   | 2.6   | 3.1    | 2.6   | 3.3   | 2.5   | 3.6    | 3.4    | 3.2    | 2.7    | 3.2    | 2.9    |
| Tjap1    | 6.7   | 7.7   | 6.1    | 6.6   | 6.5   | 6.6   | 7.9    | 6.4    | 6.8    | 6.5    | 6.4    | 5.5    |
| Tjp1     | 11.0  | 11.3  | 12.7   | 10.8  | 9.9   | 10.5  | 13.0   | 15.3   | 12.3   | 14.4   | 14.9   | 15.7   |
| Tjp2     | 5.1   | 3.2   | 3.2    | 5.4   | 4.8   | 4.0   | 3.8    | 3.0    | 2.6    | 6.3    | 5.2    | 4.1    |
| Tjp3     | 0.1   | 0.0   | 0.0    | 0.2   | 0.1   | 0.0   | 0.0    | 0.0    | 0.0    | 0.0    | 0.0    | 0.0    |
| Tk1      | 1.9   | 4.1   | 6.0    | 0.9   | 5.6   | 0.7   | 8.7    | 5.0    | 7.2    | 3.4    | 5.8    | 3.5    |
| Tk2      | 14.2  | 10.9  | 10.1   | 16.8  | 11.4  | 17.3  | 10.8   | 7.5    | 9.8    | 10.6   | 8.5    | 11.7   |
| Tkt      | 87.1  | 79.5  | 73.9   | 102.2 | 92.1  | 104.3 | 84.9   | 86.2   | 69.5   | 64.5   | 79.2   | 67.8   |
| Tktl1    | 0.0   | 0.0   | 0.0    | 0.0   | 0.0   | 0.2   | 0.0    | 0.0    | 0.0    | 0.1    | 0.0    | 0.1    |
| Tlcd1    | 3.7   | 5.2   | 5.9    | 2.8   | 2.9   | 4.2   | 5.6    | 7.8    | 8.1    | 4.1    | 5.8    | 4.7    |
| Tlcd2    | 9.5   | 14.2  | 11.5   | 5.4   | 6.9   | 12.8  | 9.4    | 15.2   | 10.1   | 5.4    | 10.4   | 6.2    |
| Tle1     | 2.4   | 1.6   | 1.4    | 2.9   | 2.6   | 2.4   | 1.6    | 2.5    | 1.5    | 3.0    | 2.0    | 1.7    |
| Tle2     | 1.0   | 1.9   | 2.4    | 0.7   | 1.1   | 1.0   | 1.6    | 1.8    | 2.8    | 1.2    | 1.2    | 1.8    |
| Tle3     | 5.3   | 6.7   | 6.0    | 5.4   | 6.0   | 5.1   | 7.2    | 5.3    | 5.9    | 6.3    | 5.9    | 4.7    |
| Tle4     | 1.7   | 1.7   | 1.5    | 2.2   | 2.1   | 1.1   | 1.1    | 0.8    | 1.1    | 0.9    | 1.0    | 0.8    |

Online Table 1

|         |       |       |       |       |       |       |       |       |       |       |       |       |
|---------|-------|-------|-------|-------|-------|-------|-------|-------|-------|-------|-------|-------|
| Tle6    | 10.7  | 12.8  | 10.2  | 12.1  | 8.9   | 12.2  | 11.6  | 11.5  | 11.4  | 6.7   | 9.8   | 8.7   |
| Tlk1    | 12.5  | 12.7  | 12.8  | 17.1  | 12.6  | 14.1  | 13.2  | 12.2  | 11.7  | 11.1  | 14.5  | 12.9  |
| Tlk2    | 10.8  | 10.0  | 9.9   | 11.1  | 8.6   | 10.8  | 10.0  | 10.3  | 8.8   | 9.2   | 10.5  | 11.0  |
| Tll1    | 0.7   | 0.3   | 0.2   | 0.5   | 0.3   | 1.6   | 0.7   | 0.5   | 0.5   | 2.3   | 2.1   | 1.0   |
| Tll2    | 0.0   | 0.0   | 0.0   | 0.0   | 0.0   | 0.0   | 0.0   | 0.0   | 0.0   | 0.0   | 0.0   | 0.0   |
| Tln1    | 80.3  | 68.4  | 60.6  | 80.3  | 90.7  | 60.8  | 82.7  | 67.4  | 77.3  | 78.2  | 75.4  | 67.8  |
| Tln2    | 33.2  | 32.5  | 33.2  | 36.1  | 31.7  | 26.3  | 35.1  | 41.9  | 31.7  | 19.5  | 25.0  | 27.5  |
| Tlr1    | 0.2   | 0.3   | 0.3   | 0.5   | 1.3   | 0.1   | 0.4   | 0.1   | 0.3   | 0.2   | 0.1   | 0.2   |
| Tlr13   | 1.4   | 0.0   | 0.1   | 9.4   | 15.1  | 0.0   | 1.2   | 0.1   | 0.2   | 0.7   | 0.4   | 0.7   |
| Tlr2    | 5.2   | 5.0   | 8.0   | 7.0   | 14.0  | 5.3   | 4.6   | 6.4   | 3.3   | 4.1   | 3.0   | 4.8   |
| Tlr3    | 3.4   | 3.6   | 4.6   | 5.0   | 4.6   | 4.1   | 4.2   | 3.6   | 3.2   | 2.7   | 3.2   | 3.7   |
| Tlr4    | 12.8  | 11.5  | 10.1  | 16.0  | 14.8  | 12.8  | 8.2   | 7.7   | 7.5   | 13.0  | 10.5  | 11.3  |
| Tlr5    | 1.6   | 2.1   | 1.4   | 1.3   | 1.3   | 1.8   | 1.4   | 1.7   | 1.5   | 1.1   | 1.7   | 1.4   |
| Tlr6    | 1.3   | 1.1   | 1.0   | 1.7   | 1.3   | 1.3   | 1.2   | 1.2   | 1.2   | 1.0   | 1.3   | 1.3   |
| Tlr7    | 0.3   | 0.0   | 0.0   | 2.6   | 2.9   | 0.0   | 0.2   | 0.1   | 0.0   | 0.2   | 0.1   | 0.3   |
| Tlr8    | 0.3   | 0.0   | 0.0   | 2.1   | 2.3   | 0.0   | 0.2   | 0.0   | 0.0   | 0.1   | 0.1   | 0.1   |
| Tlr9    | 0.0   | 0.1   | 0.0   | 0.2   | 0.4   | 0.0   | 0.1   | 0.0   | 0.1   | 0.0   | 0.0   | 0.0   |
| Tm2d1   | 20.1  | 22.5  | 20.2  | 22.3  | 23.3  | 22.5  | 21.0  | 22.8  | 25.7  | 22.9  | 25.9  | 23.5  |
| Tm2d2   | 83.2  | 75.5  | 64.8  | 68.4  | 75.6  | 73.1  | 72.5  | 61.5  | 69.9  | 82.6  | 72.6  | 70.6  |
| Tm2d3   | 17.7  | 13.9  | 16.7  | 18.7  | 15.0  | 21.3  | 13.8  | 16.4  | 15.2  | 18.2  | 15.8  | 16.3  |
| Tm4sf1  | 75.7  | 58.2  | 46.2  | 36.5  | 40.7  | 47.0  | 35.2  | 36.9  | 50.3  | 60.7  | 56.5  | 58.1  |
| Tm4sf19 | 0.1   | 0.0   | 0.1   | 0.0   | 0.3   | 0.0   | 0.1   | 0.0   | 0.1   | 0.2   | 0.2   | 0.2   |
| Tm4sf20 | 0.0   | 0.1   | 0.1   | 0.1   | 0.1   | 0.0   | 0.0   | 0.1   | 0.0   | 0.1   | 0.0   | 0.1   |
| Tm4sf4  | 0.1   | 0.1   | 0.0   | 0.1   | 0.1   | 0.0   | 0.0   | 0.1   | 0.1   | 0.1   | 0.2   | 0.0   |
| Tm6sf1  | 0.9   | 0.2   | 0.2   | 3.5   | 6.6   | 0.1   | 1.0   | 0.3   | 0.3   | 0.7   | 0.3   | 0.6   |
| Tm6sf2  | 0.1   | 0.0   | 0.1   | 0.0   | 0.1   | 0.0   | 0.0   | 0.0   | 0.1   | 0.1   | 0.2   | 0.0   |
| Tm7sf2  | 3.6   | 4.8   | 4.8   | 2.2   | 2.2   | 3.0   | 8.2   | 14.6  | 10.5  | 3.6   | 9.0   | 3.9   |
| Tm7sf3  | 15.9  | 15.6  | 14.5  | 16.3  | 12.3  | 22.2  | 11.5  | 12.7  | 13.3  | 14.8  | 13.4  | 14.5  |
| Tm9sf1  | 27.0  | 26.9  | 23.5  | 29.3  | 27.5  | 27.6  | 27.6  | 27.3  | 28.3  | 26.4  | 23.6  | 24.8  |
| Tm9sf2  | 58.4  | 56.4  | 53.5  | 57.4  | 56.6  | 58.4  | 55.2  | 58.9  | 63.7  | 63.2  | 61.3  | 64.6  |
| Tm9sf3  | 51.2  | 46.7  | 50.2  | 65.2  | 57.1  | 58.6  | 56.2  | 50.5  | 54.3  | 65.1  | 63.4  | 65.5  |
| Tm9sf4  | 25.5  | 23.9  | 24.1  | 24.6  | 23.0  | 24.4  | 25.8  | 24.4  | 21.9  | 21.7  | 22.0  | 22.7  |
| Tma16   | 9.1   | 5.7   | 5.4   | 10.5  | 10.4  | 7.0   | 6.4   | 5.2   | 5.4   | 6.7   | 8.1   | 6.8   |
| Tma7    | 170.0 | 156.7 | 165.4 | 191.9 | 150.2 | 160.4 | 152.5 | 157.5 | 144.2 | 169.5 | 195.1 | 171.6 |
| Tmbim1  | 97.7  | 78.6  | 65.5  | 96.4  | 77.8  | 84.5  | 85.1  | 81.6  | 79.3  | 67.5  | 77.8  | 71.5  |
| Tmbim4  | 59.4  | 53.8  | 43.6  | 60.3  | 60.3  | 54.3  | 44.7  | 44.5  | 42.5  | 64.3  | 54.0  | 50.9  |
| Tmbim6  | 159.5 | 152.1 | 141.3 | 175.7 | 168.3 | 151.8 | 169.1 | 168.0 | 178.9 | 169.1 | 162.3 | 158.8 |
| Tmc3    | 0.3   | 0.1   | 0.2   | 0.1   | 0.1   | 0.2   | 0.2   | 0.2   | 0.1   | 0.1   | 0.1   | 0.1   |
| Tmc4    | 0.6   | 0.7   | 1.1   | 0.6   | 0.4   | 0.5   | 0.5   | 0.6   | 0.7   | 0.8   | 0.8   | 0.5   |
| Tmc5    | 0.0   | 0.0   | 0.0   | 0.0   | 0.0   | 0.0   | 0.0   | 0.0   | 0.0   | 0.0   | 0.0   | 0.0   |
| Tmc6    | 11.7  | 11.2  | 9.2   | 10.2  | 9.5   | 10.2  | 9.8   | 13.1  | 11.6  | 13.2  | 10.2  | 10.4  |
| Tmc7    | 1.1   | 1.8   | 1.3   | 1.1   | 1.2   | 1.5   | 0.8   | 1.1   | 0.9   | 0.7   | 0.8   | 0.7   |
| Tmc8    | 0.1   | 0.1   | 0.1   | 0.1   | 0.1   | 0.2   | 0.3   | 0.1   | 0.1   | 0.2   | 0.1   | 0.2   |
| Tmcc1   | 5.1   | 4.9   | 4.2   | 5.5   | 4.4   | 4.5   | 4.5   | 4.5   | 4.4   | 4.5   | 4.9   | 4.7   |
| Tmcc2   | 6.6   | 7.4   | 6.6   | 7.7   | 7.7   | 9.7   | 8.2   | 6.1   | 6.8   | 5.2   | 6.7   | 5.5   |
| Tmcc3   | 3.2   | 4.3   | 4.5   | 3.6   | 3.8   | 3.2   | 3.8   | 3.6   | 3.7   | 2.8   | 2.9   | 3.5   |
| Tmco1   | 16.4  | 15.1  | 14.9  | 18.7  | 15.3  | 15.0  | 14.1  | 12.5  | 14.0  | 19.1  | 17.3  | 18.2  |
| Tmco3   | 14.6  | 11.7  | 10.9  | 16.8  | 13.5  | 16.0  | 14.4  | 10.6  | 12.1  | 12.4  | 13.7  | 13.1  |
| Tmco4   | 2.5   | 2.9   | 3.1   | 3.1   | 2.9   | 3.1   | 2.9   | 2.9   | 3.0   | 3.3   | 3.6   | 3.1   |
| Tmco6   | 3.5   | 3.6   | 3.8   | 2.8   | 3.1   | 3.9   | 3.0   | 4.8   | 4.7   | 3.5   | 3.3   | 3.3   |
| Tmed1   | 10.4  | 14.0  | 15.7  | 10.6  | 12.6  | 10.7  | 13.4  | 16.0  | 17.7  | 16.2  | 11.9  | 15.9  |
| Tmed10  | 44.4  | 40.4  | 43.2  | 54.6  | 50.2  | 52.9  | 47.9  | 46.9  | 48.0  | 48.3  | 48.7  | 51.8  |
| Tmed2   | 207.5 | 169.8 | 172.8 | 241.9 | 188.3 | 200.1 | 223.1 | 195.1 | 191.8 | 211.7 | 239.1 | 234.6 |
| Tmed3   | 139.4 | 119.7 | 124.6 | 145.8 | 123.8 | 125.1 | 142.4 | 118.6 | 126.1 | 137.8 | 143.3 | 153.6 |
| Tmed4   | 39.6  | 34.2  | 29.4  | 43.1  | 32.2  | 47.9  | 28.8  | 30.7  | 30.4  | 36.3  | 34.4  | 32.9  |
| Tmed5   | 14.8  | 14.9  | 15.8  | 24.7  | 16.9  | 19.9  | 16.4  | 13.8  | 12.9  | 14.4  | 22.4  | 19.1  |
| Tmed7   | 38.3  | 36.1  | 38.6  | 44.4  | 37.2  | 48.0  | 36.3  | 37.6  | 37.1  | 41.6  | 46.4  | 48.6  |

Online Table 1

|          |      |      |      |       |       |       |      |      |       |       |      |      |
|----------|------|------|------|-------|-------|-------|------|------|-------|-------|------|------|
| Tmed8    | 5.3  | 5.6  | 5.0  | 5.5   | 5.5   | 5.1   | 4.5  | 3.8  | 4.2   | 4.6   | 4.2  | 4.2  |
| Tmed9    | 94.0 | 97.0 | 85.7 | 104.8 | 100.5 | 105.0 | 95.0 | 95.0 | 102.6 | 103.7 | 91.0 | 92.9 |
| Tmeff1   | 19.5 | 16.4 | 13.4 | 21.5  | 18.3  | 19.1  | 15.3 | 5.3  | 8.7   | 14.3  | 16.7 | 16.5 |
| Tmeff2   | 5.5  | 2.9  | 2.5  | 2.8   | 2.4   | 2.6   | 4.8  | 3.1  | 3.2   | 9.6   | 8.1  | 7.6  |
| Tmem100  | 0.0  | 0.0  | 0.1  | 0.0   | 0.0   | 0.0   | 0.0  | 0.0  | 0.0   | 0.0   | 0.0  | 0.1  |
| Tmem101  | 5.7  | 5.6  | 4.7  | 6.4   | 5.5   | 6.4   | 4.8  | 6.1  | 5.0   | 6.6   | 5.0  | 5.7  |
| Tmem104  | 4.6  | 4.2  | 3.2  | 5.3   | 4.9   | 5.4   | 4.6  | 3.9  | 3.4   | 4.1   | 3.0  | 2.7  |
| Tmem106a | 3.9  | 4.5  | 4.0  | 9.0   | 8.6   | 6.0   | 4.5  | 3.8  | 4.0   | 2.6   | 2.7  | 3.4  |
| Tmem106b | 30.5 | 30.0 | 36.2 | 33.7  | 27.4  | 36.8  | 32.6 | 35.0 | 30.6  | 30.3  | 36.9 | 37.3 |
| Tmem106c | 15.3 | 15.3 | 12.3 | 16.4  | 12.8  | 22.1  | 11.9 | 12.0 | 11.6  | 13.8  | 13.7 | 14.0 |
| Tmem107  | 2.1  | 3.1  | 2.7  | 2.6   | 3.2   | 3.6   | 2.7  | 3.1  | 3.2   | 2.0   | 2.7  | 3.2  |
| Tmem108  | 1.1  | 0.6  | 0.6  | 0.3   | 0.2   | 0.1   | 0.2  | 0.7  | 0.4   | 6.8   | 3.0  | 1.3  |
| Tmem109  | 15.9 | 14.6 | 14.3 | 17.4  | 18.1  | 17.8  | 17.2 | 16.1 | 16.9  | 16.4  | 15.0 | 12.2 |
| Tmem11   | 11.1 | 9.4  | 10.8 | 16.0  | 10.1  | 13.9  | 14.3 | 12.7 | 12.4  | 12.3  | 13.2 | 14.1 |
| Tmem110  | 3.9  | 3.9  | 4.0  | 3.4   | 3.6   | 4.0   | 4.5  | 4.3  | 4.8   | 3.8   | 4.1  | 4.3  |
| Tmem115  | 19.1 | 17.1 | 13.6 | 18.8  | 18.0  | 19.8  | 19.0 | 16.9 | 19.9  | 18.9  | 18.1 | 16.1 |
| Tmem116  | 0.7  | 0.6  | 0.3  | 0.8   | 0.4   | 0.8   | 0.3  | 0.3  | 0.2   | 0.6   | 0.3  | 0.6  |
| Tmem117  | 2.6  | 0.8  | 0.3  | 0.7   | 0.2   | 1.8   | 0.3  | 0.2  | 0.1   | 0.6   | 0.7  | 0.6  |
| Tmem119  | 8.3  | 9.8  | 11.7 | 8.7   | 6.5   | 4.6   | 10.9 | 13.3 | 16.0  | 9.8   | 7.9  | 11.6 |
| Tmem120a | 13.6 | 11.8 | 11.2 | 14.6  | 13.7  | 13.0  | 13.8 | 15.0 | 13.0  | 14.4  | 14.7 | 13.3 |
| Tmem120b | 2.3  | 1.6  | 1.4  | 2.2   | 1.7   | 1.6   | 2.0  | 2.5  | 2.3   | 1.6   | 1.9  | 1.5  |
| Tmem121  | 0.9  | 0.9  | 1.0  | 0.7   | 1.1   | 0.9   | 1.0  | 0.9  | 1.1   | 0.9   | 0.9  | 1.3  |
| Tmem123  | 25.8 | 27.2 | 38.9 | 34.9  | 42.4  | 30.0  | 41.4 | 40.9 | 50.7  | 36.3  | 42.7 | 57.2 |
| Tmem125  | 0.0  | 0.0  | 0.0  | 0.0   | 0.0   | 0.0   | 0.0  | 0.0  | 0.0   | 0.2   | 0.2  | 0.0  |
| Tmem126a | 59.4 | 58.1 | 40.8 | 68.6  | 52.6  | 68.3  | 45.3 | 41.4 | 54.2  | 46.4  | 53.2 | 44.8 |
| Tmem126b | 22.9 | 21.0 | 19.5 | 25.1  | 19.8  | 21.8  | 19.8 | 13.4 | 21.1  | 22.5  | 21.5 | 23.3 |
| Tmem127  | 25.9 | 24.1 | 24.0 | 26.6  | 24.7  | 22.9  | 25.4 | 23.1 | 23.4  | 25.7  | 25.3 | 26.5 |
| Tmem128  | 31.4 | 33.9 | 28.0 | 28.1  | 31.4  | 28.1  | 32.2 | 31.4 | 37.8  | 30.2  | 32.6 | 30.6 |
| Tmem129  | 16.5 | 15.0 | 13.9 | 15.9  | 13.7  | 16.4  | 16.7 | 12.2 | 16.3  | 12.6  | 14.3 | 13.2 |
| Tmem130  | 0.0  | 0.0  | 0.0  | 0.0   | 0.0   | 0.0   | 0.0  | 0.0  | 0.0   | 0.0   | 0.1  | 0.1  |
| Tmem131  | 4.8  | 5.6  | 6.0  | 5.5   | 6.2   | 5.5   | 6.5  | 5.0  | 4.9   | 4.9   | 5.3  | 4.4  |
| Tmem132a | 9.0  | 7.5  | 7.4  | 10.4  | 10.6  | 11.4  | 9.1  | 8.6  | 9.5   | 10.5  | 7.9  | 6.1  |
| Tmem132b | 0.0  | 0.0  | 0.0  | 0.1   | 0.0   | 0.1   | 0.0  | 0.0  | 0.0   | 0.0   | 0.0  | 0.0  |
| Tmem132c | 0.1  | 0.1  | 0.2  | 0.1   | 0.1   | 0.1   | 0.0  | 0.0  | 0.0   | 0.0   | 0.0  | 0.1  |
| Tmem132d | 0.0  | 0.0  | 0.0  | 0.0   | 0.0   | 0.0   | 0.0  | 0.0  | 0.0   | 0.0   | 0.0  | 0.0  |
| Tmem132e | 0.1  | 0.2  | 0.0  | 0.3   | 0.2   | 0.4   | 0.4  | 0.1  | 0.2   | 0.1   | 0.1  | 0.0  |
| Tmem134  | 32.7 | 27.3 | 24.2 | 30.1  | 30.2  | 36.8  | 27.1 | 28.4 | 27.1  | 30.1  | 25.5 | 26.2 |
| Tmem135  | 9.6  | 10.5 | 10.4 | 7.6   | 9.3   | 7.9   | 8.2  | 9.5  | 9.1   | 8.7   | 9.2  | 9.0  |
| Tmem136  | 0.3  | 0.7  | 0.6  | 0.4   | 0.3   | 0.9   | 0.8  | 0.7  | 0.5   | 0.5   | 0.3  | 0.5  |
| Tmem138  | 5.5  | 4.8  | 2.6  | 2.9   | 4.6   | 5.2   | 3.9  | 3.5  | 4.6   | 5.3   | 3.6  | 3.4  |
| Tmem140  | 0.9  | 0.5  | 0.6  | 1.8   | 1.2   | 1.5   | 0.7  | 0.6  | 0.8   | 0.7   | 0.5  | 1.0  |
| Tmem141  | 10.8 | 8.1  | 7.4  | 11.7  | 9.3   | 11.7  | 7.4  | 7.8  | 7.0   | 8.4   | 9.8  | 9.0  |
| Tmem143  | 6.5  | 6.6  | 5.3  | 7.5   | 5.2   | 8.2   | 5.7  | 6.2  | 6.3   | 6.2   | 5.8  | 5.4  |
| Tmem144  | 1.4  | 1.4  | 1.2  | 1.0   | 1.4   | 1.4   | 0.9  | 0.7  | 0.9   | 1.0   | 1.0  | 0.9  |
| Tmem147  | 41.8 | 36.2 | 30.1 | 37.4  | 36.8  | 37.9  | 38.0 | 40.7 | 35.9  | 41.6  | 37.2 | 31.8 |
| Tmem14a  | 4.9  | 5.3  | 4.8  | 4.8   | 5.5   | 7.0   | 4.6  | 4.8  | 5.1   | 6.0   | 6.7  | 6.6  |
| Tmem14c  | 57.1 | 58.6 | 60.9 | 58.0  | 64.0  | 56.1  | 64.4 | 62.2 | 66.1  | 60.8  | 60.8 | 65.4 |
| Tmem150a | 10.6 | 13.3 | 15.5 | 10.3  | 12.0  | 12.2  | 16.6 | 20.9 | 21.8  | 16.1  | 15.8 | 16.5 |
| Tmem150b | 0.4  | 0.3  | 0.3  | 0.3   | 0.6   | 0.3   | 0.4  | 0.2  | 0.4   | 0.3   | 0.6  | 0.4  |
| Tmem150c | 0.2  | 0.2  | 0.1  | 0.1   | 0.2   | 0.0   | 0.1  | 0.0  | 0.0   | 0.0   | 0.1  | 0.1  |
| Tmem151a | 16.5 | 11.4 | 9.4  | 13.0  | 8.9   | 12.6  | 14.7 | 13.0 | 10.2  | 15.5  | 15.3 | 13.8 |
| Tmem151b | 0.0  | 0.0  | 0.0  | 0.1   | 0.0   | 0.0   | 0.0  | 0.0  | 0.0   | 0.0   | 0.0  | 0.0  |
| Tmem154  | 3.0  | 1.2  | 1.7  | 1.5   | 1.3   | 1.2   | 1.0  | 1.2  | 0.9   | 2.1   | 1.9  | 1.5  |
| Tmem158  | 0.6  | 0.3  | 0.2  | 0.8   | 0.8   | 0.7   | 0.4  | 0.7  | 0.5   | 0.6   | 0.4  | 0.4  |
| Tmem159  | 35.9 | 36.4 | 39.8 | 44.8  | 42.4  | 45.1  | 51.1 | 50.7 | 46.2  | 38.4  | 49.3 | 42.1 |
| Tmem160  | 57.7 | 59.6 | 51.4 | 50.4  | 49.2  | 43.3  | 57.8 | 45.4 | 56.8  | 53.8  | 53.7 | 64.3 |
| Tmem161a | 11.2 | 9.7  | 10.0 | 11.0  | 8.5   | 12.9  | 10.2 | 10.5 | 10.4  | 9.8   | 9.8  | 9.7  |

Online Table 1

|             |       |      |      |       |       |      |      |      |      |      |      |      |
|-------------|-------|------|------|-------|-------|------|------|------|------|------|------|------|
| Tmem161b    | 2.8   | 3.1  | 3.2  | 2.4   | 3.4   | 2.9  | 3.1  | 2.9  | 2.8  | 2.4  | 2.4  | 2.5  |
| Tmem163     | 0.1   | 0.0  | 0.0  | 0.0   | 0.1   | 0.0  | 0.0  | 0.0  | 0.0  | 0.0  | 0.0  | 0.0  |
| Tmem164     | 6.7   | 7.7  | 8.1  | 7.3   | 9.3   | 5.6  | 6.3  | 8.9  | 7.3  | 6.1  | 6.2  | 6.8  |
| Tmem165     | 29.2  | 29.4 | 30.7 | 25.9  | 27.3  | 28.3 | 30.0 | 29.8 | 35.8 | 34.0 | 34.8 | 34.7 |
| Tmem167     | 6.9   | 7.1  | 6.2  | 6.8   | 7.5   | 6.4  | 6.3  | 7.0  | 7.8  | 8.1  | 8.5  | 7.4  |
| Tmem167b    | 37.6  | 31.0 | 30.9 | 37.8  | 31.3  | 36.6 | 30.1 | 30.5 | 31.3 | 33.6 | 37.7 | 37.3 |
| Tmem168     | 8.7   | 9.3  | 9.9  | 9.8   | 10.9  | 9.6  | 10.8 | 10.9 | 13.2 | 12.1 | 12.6 | 12.8 |
| Tmem169     | 0.1   | 0.2  | 0.4  | 0.2   | 0.1   | 0.1  | 0.1  | 0.1  | 0.1  | 0.0  | 0.0  | 0.1  |
| Tmem17      | 1.6   | 0.7  | 1.5  | 1.5   | 1.1   | 1.4  | 1.9  | 2.1  | 2.5  | 1.0  | 1.6  | 1.8  |
| Tmem170     | 1.1   | 1.7  | 1.6  | 1.4   | 1.1   | 1.5  | 1.2  | 1.1  | 1.5  | 1.3  | 1.5  | 1.0  |
| Tmem170b    | 2.1   | 2.9  | 2.7  | 2.1   | 2.4   | 2.1  | 2.1  | 2.1  | 2.2  | 2.0  | 2.0  | 1.9  |
| Tmem171     | 0.2   | 0.0  | 0.0  | 1.7   | 2.3   | 0.1  | 0.1  | 0.0  | 0.1  | 0.2  | 0.0  | 0.1  |
| Tmem173     | 6.7   | 7.1  | 9.3  | 9.7   | 13.8  | 4.8  | 9.3  | 8.6  | 8.1  | 12.4 | 8.9  | 8.3  |
| Tmem175     | 7.5   | 6.5  | 6.5  | 7.6   | 6.7   | 7.1  | 6.8  | 6.9  | 7.2  | 6.4  | 7.3  | 7.1  |
| Tmem176a    | 67.1  | 59.5 | 58.3 | 74.0  | 73.0  | 53.7 | 62.0 | 37.0 | 52.0 | 54.3 | 34.1 | 54.4 |
| Tmem176b    | 112.1 | 82.1 | 85.5 | 113.7 | 106.2 | 71.3 | 87.3 | 63.6 | 77.9 | 93.2 | 58.8 | 83.8 |
| Tmem177     | 2.2   | 2.0  | 1.8  | 2.1   | 1.9   | 2.0  | 1.7  | 1.7  | 1.8  | 1.7  | 1.8  | 1.8  |
| Tmem178     | 0.2   | 1.0  | 1.4  | 0.2   | 0.7   | 0.1  | 0.4  | 1.0  | 1.8  | 0.3  | 0.3  | 0.9  |
| Tmem178b    | 0.0   | 0.0  | 0.0  | 0.0   | 0.0   | 0.1  | 0.0  | 0.0  | 0.0  | 0.0  | 0.0  | 0.0  |
| Tmem179     | 0.4   | 0.1  | 0.1  | 0.9   | 0.1   | 1.2  | 0.1  | 0.1  | 0.1  | 0.4  | 0.2  | 0.1  |
| Tmem179b    | 19.5  | 21.5 | 18.4 | 20.7  | 20.8  | 22.0 | 23.0 | 21.0 | 23.5 | 22.0 | 18.2 | 23.9 |
| Tmem18      | 9.4   | 10.2 | 10.5 | 9.6   | 9.6   | 9.3  | 8.6  | 9.2  | 9.1  | 8.7  | 8.6  | 9.8  |
| Tmem180     | 0.2   | 0.1  | 0.1  | 0.3   | 0.5   | 0.2  | 0.4  | 0.2  | 0.1  | 0.1  | 0.1  | 0.1  |
| Tmem181a    | 19.0  | 18.0 | 17.0 | 18.6  | 18.0  | 20.9 | 17.8 | 17.2 | 17.4 | 15.6 | 14.8 | 15.6 |
| Tmem181b-ps | 6.0   | 5.9  | 5.1  | 6.0   | 6.4   | 6.6  | 5.9  | 5.5  | 6.0  | 5.0  | 5.3  | 5.1  |
| Tmem181c-ps | 4.7   | 4.7  | 4.2  | 4.0   | 4.9   | 5.3  | 4.4  | 4.3  | 4.5  | 4.1  | 4.0  | 4.3  |
| Tmem183a    | 15.5  | 15.3 | 12.8 | 13.0  | 13.6  | 16.0 | 14.4 | 13.0 | 17.0 | 15.1 | 16.3 | 14.9 |
| Tmem184a    | 1.7   | 1.3  | 1.4  | 1.3   | 0.8   | 1.2  | 1.1  | 1.7  | 1.2  | 1.1  | 2.0  | 0.7  |
| Tmem184b    | 24.1  | 27.1 | 22.2 | 30.5  | 27.7  | 28.0 | 27.4 | 20.2 | 21.1 | 19.5 | 21.1 | 18.6 |
| Tmem184c    | 27.2  | 26.8 | 29.9 | 24.8  | 24.8  | 25.1 | 28.7 | 27.1 | 24.7 | 28.7 | 32.4 | 32.8 |
| Tmem185b    | 5.5   | 5.3  | 4.9  | 5.2   | 5.9   | 4.9  | 5.3  | 5.9  | 6.2  | 6.5  | 5.9  | 5.6  |
| Tmem186     | 3.5   | 3.2  | 4.1  | 4.8   | 3.8   | 3.4  | 4.2  | 3.3  | 3.4  | 3.5  | 3.9  | 4.1  |
| Tmem189     | 23.2  | 21.4 | 21.2 | 29.9  | 29.0  | 23.0 | 24.5 | 23.3 | 23.0 | 19.1 | 24.2 | 20.9 |
| Tmem19      | 11.4  | 13.0 | 13.9 | 9.6   | 14.1  | 10.7 | 12.9 | 12.3 | 14.4 | 11.9 | 12.4 | 12.5 |
| Tmem191c    | 0.2   | 0.1  | 0.1  | 0.1   | 0.2   | 0.3  | 0.1  | 0.3  | 0.2  | 0.1  | 0.0  | 0.2  |
| Tmem192     | 16.9  | 10.8 | 9.7  | 18.3  | 13.6  | 14.9 | 12.5 | 9.7  | 8.5  | 11.1 | 10.9 | 10.8 |
| Tmem194     | 1.1   | 1.4  | 1.8  | 0.8   | 1.7   | 0.9  | 2.0  | 1.2  | 1.5  | 1.1  | 1.6  | 1.5  |
| Tmem194b    | 0.6   | 0.9  | 1.1  | 0.4   | 0.9   | 0.7  | 0.6  | 0.7  | 0.8  | 0.6  | 0.5  | 0.7  |
| Tmem198     | 0.4   | 0.4  | 0.3  | 0.5   | 0.4   | 0.4  | 0.4  | 0.4  | 0.4  | 0.2  | 0.3  | 0.2  |
| Tmem198b    | 8.0   | 8.2  | 9.2  | 6.4   | 8.1   | 7.1  | 8.8  | 9.4  | 9.4  | 9.2  | 8.4  | 9.7  |
| Tmem199     | 18.9  | 16.2 | 13.8 | 17.0  | 15.1  | 17.9 | 12.8 | 11.1 | 13.0 | 13.2 | 14.3 | 14.8 |
| Tmem2       | 4.5   | 4.4  | 5.4  | 3.2   | 4.8   | 3.1  | 5.4  | 5.7  | 5.5  | 9.7  | 7.1  | 6.0  |
| Tmem200a    | 0.6   | 0.8  | 1.2  | 0.6   | 1.2   | 0.9  | 2.7  | 0.7  | 1.9  | 1.8  | 1.8  | 2.0  |
| Tmem200b    | 1.1   | 1.0  | 1.3  | 0.5   | 0.4   | 0.7  | 0.9  | 1.1  | 1.5  | 1.2  | 0.9  | 0.6  |
| Tmem200c    | 0.0   | 0.0  | 0.0  | 0.0   | 0.0   | 0.0  | 0.0  | 0.0  | 0.0  | 0.0  | 0.0  | 0.0  |
| Tmem201     | 2.1   | 2.7  | 2.4  | 2.4   | 2.3   | 3.0  | 2.7  | 2.4  | 2.6  | 2.5  | 2.0  | 2.1  |
| Tmem202     | 2.8   | 1.8  | 1.4  | 4.7   | 1.7   | 3.3  | 1.7  | 1.5  | 1.6  | 3.7  | 2.2  | 3.1  |
| Tmem203     | 7.4   | 8.0  | 7.0  | 7.8   | 8.3   | 10.7 | 7.3  | 7.5  | 7.6  | 10.5 | 5.3  | 7.4  |
| Tmem204     | 7.7   | 7.8  | 6.2  | 13.0  | 11.7  | 8.5  | 11.5 | 6.5  | 7.8  | 7.4  | 5.2  | 6.3  |
| Tmem205     | 34.7  | 29.4 | 20.3 | 32.9  | 29.6  | 39.6 | 20.8 | 24.7 | 30.2 | 30.4 | 25.1 | 21.8 |
| Tmem206     | 2.2   | 1.9  | 1.6  | 3.8   | 3.3   | 2.5  | 2.1  | 1.5  | 1.8  | 2.2  | 1.9  | 1.8  |
| Tmem208     | 26.6  | 23.0 | 20.3 | 26.2  | 30.1  | 26.1 | 28.8 | 28.7 | 31.0 | 34.0 | 28.4 | 28.9 |
| Tmem209     | 8.8   | 8.0  | 7.4  | 10.7  | 8.4   | 9.3  | 8.4  | 7.9  | 7.9  | 7.1  | 8.4  | 7.2  |
| Tmem214     | 17.5  | 15.1 | 15.4 | 20.1  | 15.5  | 16.6 | 18.4 | 17.9 | 17.0 | 16.3 | 19.1 | 16.9 |
| Tmem215     | 0.0   | 0.1  | 0.1  | 0.0   | 0.0   | 0.0  | 0.1  | 0.0  | 0.1  | 0.1  | 0.1  | 0.1  |
| Tmem216     | 4.4   | 4.4  | 3.9  | 4.9   | 3.9   | 4.3  | 3.2  | 3.7  | 4.1  | 4.0  | 3.9  | 3.1  |
| Tmem217     | 0.1   | 0.3  | 0.0  | 0.0   | 0.0   | 0.1  | 0.0  | 0.0  | 0.1  | 0.1  | 0.1  | 0.1  |

Online Table 1

|          |       |       |       |       |       |       |       |       |       |       |       |       |
|----------|-------|-------|-------|-------|-------|-------|-------|-------|-------|-------|-------|-------|
| Tmem218  | 14.9  | 13.0  | 12.4  | 14.8  | 10.4  | 15.8  | 12.5  | 8.7   | 12.4  | 11.8  | 14.1  | 15.2  |
| Tmem219  | 20.3  | 15.5  | 14.9  | 15.6  | 17.0  | 18.1  | 14.9  | 16.2  | 17.3  | 15.9  | 14.2  | 16.2  |
| Tmem220  | 2.0   | 2.9   | 2.8   | 2.8   | 2.1   | 2.5   | 1.4   | 2.0   | 1.8   | 1.5   | 1.9   | 1.3   |
| Tmem221  | 0.1   | 0.0   | 0.0   | 0.4   | 0.3   | 0.0   | 0.1   | 0.0   | 0.1   | 0.2   | 0.0   | 0.1   |
| Tmem222  | 15.8  | 14.8  | 13.8  | 15.5  | 15.1  | 16.7  | 16.4  | 14.3  | 15.7  | 16.6  | 15.4  | 14.9  |
| Tmem223  | 25.5  | 23.5  | 22.9  | 32.2  | 22.3  | 29.9  | 25.0  | 25.2  | 22.1  | 22.9  | 23.7  | 23.7  |
| Tmem229b | 1.1   | 1.0   | 1.5   | 1.9   | 2.6   | 1.1   | 1.4   | 1.2   | 1.1   | 1.2   | 1.2   | 1.0   |
| Tmem230  | 15.3  | 14.8  | 13.5  | 14.2  | 15.2  | 13.0  | 12.0  | 12.2  | 13.4  | 14.5  | 14.1  | 13.6  |
| Tmem231  | 3.9   | 3.7   | 3.5   | 3.3   | 2.4   | 5.4   | 3.7   | 3.4   | 2.7   | 3.6   | 3.4   | 3.5   |
| Tmem232  | 0.0   | 0.0   | 0.1   | 0.0   | 0.0   | 0.0   | 0.0   | 0.0   | 0.0   | 0.0   | 0.0   | 0.0   |
| Tmem234  | 37.6  | 32.9  | 29.9  | 32.5  | 37.7  | 32.2  | 33.0  | 40.5  | 34.1  | 35.6  | 36.7  | 34.9  |
| Tmem236  | 0.0   | 0.0   | 0.0   | 0.0   | 0.0   | 0.0   | 0.0   | 0.0   | 0.0   | 0.0   | 0.0   | 0.0   |
| Tmem237  | 12.0  | 10.6  | 11.7  | 10.7  | 10.5  | 11.7  | 14.1  | 14.0  | 12.1  | 12.7  | 13.3  | 12.8  |
| Tmem238  | 1.3   | 0.7   | 0.5   | 0.9   | 0.8   | 0.9   | 1.4   | 1.0   | 0.8   | 1.4   | 0.8   | 1.2   |
| Tmem239  | 0.1   | 0.1   | 0.1   | 0.0   | 0.0   | 0.1   | 0.0   | 0.0   | 0.0   | 0.0   | 0.0   | 0.0   |
| Tmem240  | 0.2   | 0.0   | 0.1   | 0.1   | 0.2   | 0.3   | 0.1   | 0.2   | 0.2   | 0.2   | 0.3   | 0.1   |
| Tmem241  | 2.0   | 2.5   | 2.1   | 2.2   | 1.8   | 1.8   | 1.3   | 1.8   | 1.8   | 1.7   | 2.0   | 2.0   |
| Tmem242  | 51.8  | 43.9  | 41.2  | 49.2  | 42.8  | 55.0  | 41.2  | 41.9  | 42.5  | 49.6  | 48.1  | 51.9  |
| Tmem243  | 2.1   | 2.7   | 3.1   | 4.0   | 5.0   | 3.1   | 2.9   | 2.2   | 1.9   | 2.4   | 2.1   | 2.4   |
| Tmem245  | 6.2   | 5.3   | 4.9   | 5.7   | 4.8   | 6.2   | 5.0   | 4.3   | 4.4   | 5.5   | 5.3   | 4.4   |
| Tmem246  | 2.2   | 1.8   | 1.7   | 2.2   | 1.3   | 2.7   | 1.9   | 2.1   | 2.1   | 1.3   | 1.2   | 1.5   |
| Tmem248  | 26.1  | 24.2  | 21.2  | 27.4  | 21.8  | 27.2  | 24.9  | 22.0  | 20.4  | 19.5  | 21.8  | 21.7  |
| Tmem25   | 0.1   | 0.1   | 0.1   | 0.0   | 0.0   | 0.2   | 0.0   | 0.0   | 0.0   | 0.1   | 0.1   | 0.0   |
| Tmem251  | 5.2   | 4.6   | 4.7   | 6.4   | 6.0   | 6.5   | 4.9   | 4.7   | 5.3   | 6.0   | 5.1   | 5.2   |
| Tmem253  | 0.5   | 0.3   | 0.8   | 1.0   | 0.5   | 0.8   | 0.2   | 0.6   | 0.5   | 0.3   | 0.3   | 0.5   |
| Tmem254a | 0.7   | 1.2   | 0.9   | 1.1   | 0.7   | 0.5   | 0.6   | 0.8   | 0.8   | 0.5   | 0.9   | 0.5   |
| Tmem254b | 11.1  | 11.3  | 12.6  | 9.7   | 11.0  | 11.0  | 12.7  | 12.3  | 12.4  | 8.4   | 11.8  | 10.6  |
| Tmem254c | 3.9   | 1.5   | 2.1   | 3.0   | 0.4   | 2.9   | 0.2   | 6.1   | 1.5   | 2.8   | 3.5   | 0.4   |
| Tmem255a | 0.1   | 0.1   | 0.2   | 0.1   | 0.1   | 0.1   | 0.1   | 0.1   | 0.0   | 0.1   | 0.1   | 0.1   |
| Tmem255b | 0.0   | 0.0   | 0.1   | 0.0   | 0.1   | 0.0   | 0.0   | 0.1   | 0.0   | 0.0   | 0.1   | 0.1   |
| Tmem256  | 73.3  | 64.7  | 51.3  | 55.3  | 71.8  | 73.0  | 57.0  | 73.1  | 73.6  | 60.7  | 58.3  | 54.8  |
| Tmem258  | 161.3 | 157.8 | 147.4 | 165.3 | 152.4 | 161.3 | 162.9 | 162.0 | 160.8 | 150.2 | 177.4 | 164.3 |
| Tmem259  | 34.2  | 33.3  | 32.2  | 35.0  | 33.1  | 30.3  | 44.9  | 39.3  | 40.6  | 33.5  | 35.8  | 32.0  |
| Tmem26   | 0.0   | 0.0   | 0.0   | 0.0   | 0.0   | 0.0   | 0.0   | 0.0   | 0.0   | 0.0   | 0.0   | 0.0   |
| Tmem27   | 0.0   | 0.0   | 0.1   | 0.0   | 0.0   | 0.1   | 0.0   | 0.1   | 0.0   | 0.1   | 0.0   | 0.0   |
| Tmem29   | 6.0   | 5.7   | 6.0   | 5.8   | 5.2   | 4.7   | 7.5   | 7.6   | 6.8   | 5.9   | 7.5   | 6.7   |
| Tmem30a  | 48.9  | 49.3  | 49.5  | 59.1  | 54.7  | 62.8  | 48.3  | 41.2  | 51.5  | 53.0  | 54.4  | 58.8  |
| Tmem30b  | 0.0   | 0.0   | 0.0   | 0.0   | 0.0   | 0.0   | 0.0   | 0.0   | 0.0   | 0.1   | 0.1   | 0.1   |
| Tmem33   | 14.1  | 14.9  | 14.4  | 19.9  | 13.8  | 17.9  | 14.1  | 10.9  | 13.4  | 16.7  | 17.3  | 15.9  |
| Tmem35   | 0.4   | 0.7   | 1.1   | 0.2   | 1.2   | 0.6   | 0.5   | 0.4   | 0.5   | 1.3   | 1.5   | 0.6   |
| Tmem37   | 24.7  | 17.0  | 6.3   | 47.8  | 17.6  | 41.7  | 12.5  | 6.7   | 9.0   | 11.4  | 9.7   | 6.2   |
| Tmem38a  | 3.6   | 3.0   | 2.6   | 4.0   | 3.8   | 3.3   | 4.1   | 4.1   | 3.6   | 4.0   | 3.8   | 3.6   |
| Tmem38b  | 7.2   | 7.4   | 8.6   | 10.1  | 8.3   | 6.3   | 7.8   | 8.2   | 11.1  | 8.6   | 8.7   | 9.7   |
| Tmem39a  | 12.6  | 13.6  | 12.4  | 10.3  | 14.5  | 9.9   | 13.7  | 14.9  | 17.8  | 14.1  | 13.8  | 13.7  |
| Tmem39b  | 1.1   | 1.6   | 1.2   | 1.2   | 1.3   | 1.2   | 1.7   | 1.8   | 1.6   | 1.5   | 1.6   | 1.1   |
| Tmem40   | 0.7   | 0.4   | 0.5   | 0.6   | 0.4   | 0.3   | 0.4   | 0.5   | 0.3   | 0.3   | 0.2   | 0.3   |
| Tmem41a  | 5.1   | 5.3   | 3.1   | 8.0   | 5.1   | 5.3   | 4.8   | 3.6   | 4.5   | 6.0   | 4.7   | 4.7   |
| Tmem41b  | 11.9  | 12.5  | 11.4  | 11.1  | 9.8   | 11.2  | 12.7  | 12.1  | 12.6  | 11.5  | 14.3  | 11.3  |
| Tmem42   | 4.2   | 2.6   | 2.7   | 3.4   | 3.4   | 3.1   | 2.6   | 3.1   | 3.5   | 3.3   | 3.8   | 3.9   |
| Tmem43   | 55.4  | 49.4  | 49.5  | 66.7  | 52.5  | 67.7  | 50.3  | 63.0  | 45.9  | 42.3  | 46.1  | 42.6  |
| Tmem44   | 0.3   | 0.2   | 0.3   | 0.2   | 0.2   | 0.3   | 0.3   | 0.2   | 0.3   | 0.4   | 0.3   | 0.2   |
| Tmem45a  | 112.5 | 153.7 | 208.7 | 72.5  | 140.0 | 63.0  | 159.6 | 175.3 | 157.4 | 141.7 | 152.4 | 182.3 |
| Tmem45b  | 0.1   | 0.1   | 0.1   | 0.0   | 0.1   | 0.1   | 0.3   | 0.1   | 0.1   | 0.3   | 0.0   | 0.1   |
| Tmem47   | 0.7   | 0.7   | 1.3   | 0.8   | 1.2   | 1.5   | 2.6   | 2.1   | 2.5   | 1.8   | 2.7   | 1.9   |
| Tmem48   | 5.4   | 6.0   | 6.2   | 7.1   | 6.9   | 6.2   | 7.2   | 5.0   | 5.8   | 5.5   | 6.3   | 4.5   |
| Tmem5    | 54.0  | 43.5  | 39.3  | 47.1  | 40.2  | 48.5  | 46.0  | 37.3  | 44.5  | 45.0  | 48.4  | 47.4  |
| Tmem50a  | 100.8 | 80.7  | 78.8  | 121.1 | 89.5  | 108.7 | 93.4  | 83.2  | 84.6  | 91.8  | 92.4  | 100.6 |

Online Table 1

|           |       |       |       |       |       |       |       |       |       |       |       |       |
|-----------|-------|-------|-------|-------|-------|-------|-------|-------|-------|-------|-------|-------|
| Tmem50b   | 11.7  | 9.2   | 8.3   | 11.3  | 11.3  | 8.6   | 11.7  | 9.4   | 10.1  | 10.1  | 12.6  | 9.9   |
| Tmem51    | 0.3   | 0.3   | 0.3   | 0.4   | 0.7   | 0.1   | 0.3   | 0.2   | 0.4   | 0.5   | 0.6   | 0.2   |
| Tmem51as1 | 0.0   | 0.0   | 0.0   | 0.0   | 0.0   | 0.0   | 0.0   | 0.0   | 0.0   | 0.0   | 0.0   | 0.0   |
| Tmem52    | 0.1   | 0.0   | 0.0   | 0.0   | 0.0   | 0.0   | 0.0   | 0.1   | 0.0   | 0.1   | 0.0   | 0.1   |
| Tmem52b   | 0.0   | 0.0   | 0.0   | 0.0   | 0.0   | 0.0   | 0.1   | 0.0   | 0.0   | 0.0   | 0.0   | 0.1   |
| Tmem53    | 7.7   | 6.7   | 7.7   | 7.0   | 5.6   | 6.0   | 7.3   | 6.7   | 8.6   | 7.6   | 5.4   | 6.8   |
| Tmem54    | 0.5   | 0.2   | 0.2   | 0.3   | 0.3   | 0.1   | 0.3   | 0.0   | 0.2   | 0.0   | 0.1   | 0.2   |
| Tmem55a   | 13.7  | 13.2  | 13.8  | 15.6  | 12.5  | 16.2  | 12.0  | 13.5  | 12.9  | 14.7  | 15.2  | 14.7  |
| Tmem55b   | 19.9  | 21.1  | 16.9  | 18.0  | 17.0  | 19.4  | 18.8  | 18.3  | 18.0  | 17.5  | 17.1  | 16.1  |
| Tmem56    | 0.3   | 0.1   | 0.1   | 0.7   | 0.1   | 0.5   | 0.2   | 0.1   | 0.1   | 0.2   | 0.1   | 0.2   |
| Tmem57    | 13.6  | 13.7  | 13.8  | 14.6  | 11.8  | 14.3  | 15.7  | 14.6  | 13.5  | 13.9  | 16.9  | 15.0  |
| Tmem59    | 191.1 | 179.9 | 146.9 | 187.7 | 188.9 | 198.0 | 164.1 | 148.2 | 192.8 | 196.7 | 157.4 | 178.9 |
| Tmem59l   | 2.3   | 1.9   | 0.6   | 0.7   | 0.8   | 3.4   | 2.2   | 1.0   | 0.7   | 1.0   | 1.5   | 1.2   |
| Tmem60    | 11.6  | 10.6  | 9.9   | 11.0  | 11.5  | 12.6  | 9.3   | 9.1   | 10.4  | 13.9  | 9.6   | 9.4   |
| Tmem62    | 6.8   | 7.7   | 6.1   | 6.6   | 5.1   | 6.1   | 7.3   | 6.7   | 8.9   | 6.5   | 7.6   | 7.8   |
| Tmem63a   | 14.0  | 14.8  | 14.5  | 11.9  | 15.9  | 11.8  | 22.4  | 18.9  | 18.9  | 18.4  | 18.6  | 15.2  |
| Tmem63b   | 9.6   | 9.2   | 9.5   | 10.2  | 9.0   | 10.0  | 10.7  | 8.7   | 10.0  | 10.6  | 10.6  | 8.4   |
| Tmem63c   | 0.0   | 0.0   | 0.0   | 0.1   | 0.0   | 0.0   | 0.0   | 0.0   | 0.0   | 0.0   | 0.0   | 0.0   |
| Tmem64    | 9.3   | 12.0  | 14.6  | 7.4   | 10.4  | 7.6   | 11.3  | 15.7  | 17.0  | 11.4  | 12.0  | 13.4  |
| Tmem65    | 12.3  | 13.1  | 13.6  | 11.4  | 10.3  | 13.7  | 13.0  | 11.3  | 13.2  | 11.4  | 13.9  | 13.3  |
| Tmem66    | 129.9 | 118.4 | 84.6  | 144.1 | 113.6 | 136.3 | 111.8 | 89.6  | 113.0 | 125.8 | 103.6 | 115.7 |
| Tmem67    | 2.4   | 2.9   | 2.6   | 2.4   | 2.3   | 2.4   | 2.3   | 2.6   | 2.1   | 2.2   | 2.9   | 2.4   |
| Tmem68    | 5.6   | 5.8   | 6.3   | 6.4   | 6.9   | 6.4   | 6.1   | 5.5   | 5.8   | 6.6   | 6.3   | 6.5   |
| Tmem69    | 2.5   | 1.8   | 2.2   | 2.6   | 2.2   | 2.4   | 2.1   | 1.9   | 1.6   | 2.1   | 2.1   | 2.2   |
| Tmem70    | 16.2  | 15.7  | 12.8  | 13.5  | 15.1  | 11.8  | 15.1  | 13.1  | 15.7  | 18.3  | 18.0  | 14.8  |
| Tmem71    | 1.1   | 0.7   | 0.3   | 1.3   | 1.2   | 0.9   | 0.5   | 0.2   | 0.3   | 0.1   | 0.2   | 0.2   |
| Tmem72    | 0.0   | 0.0   | 0.0   | 0.0   | 0.0   | 0.0   | 0.0   | 0.0   | 0.0   | 0.0   | 0.0   | 0.0   |
| Tmem74    | 0.1   | 0.2   | 0.0   | 0.0   | 0.1   | 0.1   | 0.3   | 0.0   | 0.2   | 0.1   | 0.2   | 0.0   |
| Tmem74b   | 0.2   | 0.0   | 0.0   | 0.2   | 0.0   | 0.2   | 0.2   | 0.1   | 0.1   | 0.1   | 0.1   | 0.1   |
| Tmem79    | 1.0   | 0.6   | 0.6   | 1.1   | 1.1   | 1.0   | 0.8   | 0.7   | 0.6   | 0.7   | 0.8   | 0.6   |
| Tmem8     | 0.6   | 0.6   | 0.4   | 1.6   | 0.9   | 0.8   | 0.6   | 0.3   | 0.3   | 0.8   | 0.7   | 0.5   |
| Tmem80    | 7.5   | 6.2   | 5.3   | 8.4   | 6.2   | 6.9   | 6.1   | 6.2   | 6.5   | 6.2   | 8.1   | 6.3   |
| Tmem81    | 1.2   | 1.5   | 1.2   | 1.3   | 1.2   | 1.3   | 1.1   | 1.2   | 1.1   | 1.3   | 0.9   | 1.1   |
| Tmem82    | 0.1   | 0.0   | 0.1   | 0.1   | 0.2   | 0.1   | 0.0   | 0.0   | 0.0   | 0.1   | 0.1   | 0.1   |
| Tmem86a   | 2.6   | 2.1   | 3.0   | 3.7   | 5.0   | 2.7   | 2.4   | 2.8   | 3.4   | 3.7   | 2.0   | 3.4   |
| Tmem86b   | 0.4   | 0.3   | 0.2   | 0.2   | 0.4   | 0.1   | 0.3   | 0.2   | 0.1   | 0.3   | 0.3   | 0.1   |
| Tmem87a   | 8.5   | 9.7   | 10.1  | 9.5   | 10.1  | 9.2   | 9.8   | 12.2  | 10.6  | 10.6  | 10.1  | 11.6  |
| Tmem87b   | 15.5  | 15.2  | 14.8  | 15.4  | 12.8  | 16.4  | 13.9  | 12.4  | 14.7  | 14.9  | 13.9  | 16.4  |
| Tmem88    | 3.4   | 3.3   | 3.0   | 3.2   | 2.7   | 4.1   | 3.4   | 3.6   | 3.5   | 4.1   | 4.6   | 4.3   |
| Tmem88b   | 0.1   | 0.2   | 0.2   | 0.1   | 0.1   | 0.1   | 0.1   | 0.3   | 0.2   | 0.1   | 0.1   | 0.1   |
| Tmem8b    | 0.9   | 1.1   | 0.7   | 0.7   | 0.5   | 1.1   | 0.5   | 0.5   | 0.5   | 0.4   | 0.5   | 0.5   |
| Tmem8c    | 0.1   | 0.2   | 0.2   | 0.1   | 0.1   | 0.0   | 0.0   | 0.1   | 0.1   | 0.0   | 0.0   | 0.0   |
| Tmem9     | 12.7  | 13.8  | 13.1  | 11.6  | 11.5  | 13.7  | 13.2  | 15.9  | 13.7  | 12.0  | 12.6  | 11.5  |
| Tmem91    | 0.3   | 0.2   | 0.1   | 0.2   | 0.3   | 0.6   | 0.0   | 0.6   | 0.3   | 0.1   | 0.5   | 0.3   |
| Tmem95    | 0.0   | 0.1   | 0.2   | 0.1   | 0.1   | 0.1   | 0.1   | 0.2   | 0.1   | 0.4   | 0.1   | 0.4   |
| Tmem97    | 23.5  | 24.1  | 24.5  | 15.4  | 22.6  | 16.8  | 35.7  | 38.5  | 33.1  | 18.6  | 33.4  | 19.6  |
| Tmem98    | 69.9  | 62.0  | 48.6  | 50.3  | 47.4  | 51.0  | 48.0  | 47.3  | 57.8  | 82.1  | 63.2  | 66.1  |
| Tmem9b    | 29.4  | 30.9  | 27.4  | 30.3  | 29.1  | 28.4  | 27.7  | 26.7  | 30.0  | 28.3  | 28.0  | 29.7  |
| Tmf1      | 26.8  | 25.0  | 22.4  | 26.8  | 24.4  | 24.4  | 23.8  | 21.8  | 20.7  | 22.5  | 29.0  | 26.6  |
| Tmie      | 0.2   | 0.1   | 0.1   | 0.0   | 0.0   | 0.1   | 0.0   | 0.0   | 0.0   | 0.0   | 0.0   | 0.0   |
| Tmigd1    | 0.0   | 0.2   | 0.0   | 0.1   | 0.1   | 0.0   | 0.0   | 0.0   | 0.0   | 0.0   | 0.1   | 0.0   |
| Tmod1     | 0.3   | 0.1   | 0.1   | 0.1   | 0.1   | 0.3   | 0.1   | 0.0   | 0.0   | 0.0   | 0.1   | 0.1   |
| Tmod2     | 0.8   | 0.9   | 1.2   | 0.8   | 0.7   | 1.2   | 1.0   | 1.4   | 0.8   | 0.6   | 0.9   | 0.8   |
| Tmod3     | 46.3  | 43.7  | 45.5  | 53.5  | 40.8  | 49.0  | 41.2  | 40.1  | 34.8  | 31.7  | 41.1  | 41.9  |
| Tmod4     | 0.0   | 0.2   | 0.0   | 0.0   | 0.0   | 0.0   | 0.1   | 0.1   | 0.1   | 0.1   | 0.1   | 0.0   |
| Tmpo      | 20.5  | 19.4  | 22.6  | 13.2  | 12.2  | 14.3  | 18.6  | 22.6  | 18.5  | 11.8  | 19.0  | 12.0  |
| Tmppe     | 1.7   | 1.9   | 1.9   | 2.1   | 2.3   | 1.7   | 2.3   | 2.0   | 1.9   | 2.3   | 1.8   | 1.7   |

Online Table 1

|           |        |       |       |        |        |       |        |        |        |        |        |        |
|-----------|--------|-------|-------|--------|--------|-------|--------|--------|--------|--------|--------|--------|
| Tmprss11e | 0.0    | 0.0   | 0.1   | 0.0    | 0.0    | 0.0   | 0.0    | 0.0    | 0.0    | 0.0    | 0.0    | 0.0    |
| Tmprss2   | 0.0    | 0.0   | 0.0   | 0.0    | 0.0    | 0.0   | 0.0    | 0.0    | 0.0    | 0.0    | 0.0    | 0.0    |
| Tmprss5   | 0.0    | 0.0   | 0.0   | 0.0    | 0.1    | 0.0   | 0.0    | 0.0    | 0.0    | 0.0    | 0.0    | 0.0    |
| Tmprss6   | 0.1    | 0.0   | 0.1   | 0.1    | 0.0    | 0.1   | 0.0    | 0.1    | 0.0    | 0.0    | 0.0    | 0.0    |
| Tmprss7   | 0.1    | 0.1   | 0.1   | 0.1    | 0.2    | 0.1   | 0.1    | 0.0    | 0.2    | 0.2    | 0.2    | 0.1    |
| Tmprss9   | 0.0    | 0.0   | 0.0   | 0.0    | 0.1    | 0.0   | 0.0    | 0.0    | 0.0    | 0.0    | 0.0    | 0.1    |
| Tmsb10    | 457.4  | 346.0 | 368.8 | 557.8  | 309.2  | 472.3 | 420.9  | 635.3  | 412.3  | 426.2  | 524.3  | 456.4  |
| Tmsb15b1  | 0.7    | 0.2   | 0.4   | 1.1    | 0.8    | 1.3   | 0.0    | 0.5    | 0.2    | 0.7    | 0.9    | 1.2    |
| Tmsb15b2  | 0.0    | 0.0   | 0.1   | 0.0    | 0.0    | 0.0   | 0.1    | 0.0    | 0.0    | 0.0    | 0.0    | 0.0    |
| Tmsb15l   | 1.7    | 1.2   | 0.6   | 0.4    | 0.4    | 0.8   | 0.8    | 1.0    | 0.9    | 1.9    | 1.3    | 1.2    |
| Tmsb4x    | 1096.7 | 938.6 | 797.3 | 1102.8 | 1919.7 | 725.9 | 1345.9 | 1461.5 | 2466.6 | 2210.3 | 1924.8 | 1995.3 |
| Tmtc1     | 0.7    | 1.7   | 3.1   | 0.9    | 0.8    | 0.8   | 0.7    | 1.7    | 0.9    | 0.6    | 0.9    | 0.9    |
| Tmtc2     | 0.4    | 0.3   | 0.4   | 0.2    | 0.3    | 0.2   | 0.4    | 0.4    | 0.3    | 1.2    | 0.5    | 0.5    |
| Tmtc3     | 10.9   | 12.0  | 11.8  | 11.5   | 12.5   | 10.7  | 12.4   | 9.9    | 11.4   | 11.2   | 12.8   | 11.0   |
| Tmtc4     | 3.1    | 3.4   | 3.4   | 4.0    | 3.1    | 3.6   | 4.4    | 5.1    | 4.7    | 3.0    | 4.6    | 4.4    |
| Tmub1     | 2.4    | 1.7   | 2.0   | 2.7    | 1.6    | 4.0   | 1.7    | 1.9    | 2.0    | 2.8    | 2.2    | 2.0    |
| Tmub2     | 12.8   | 13.4  | 11.9  | 13.3   | 11.9   | 15.2  | 12.4   | 12.8   | 14.4   | 12.4   | 12.4   | 12.8   |
| Tmx1      | 14.4   | 15.7  | 19.4  | 17.4   | 17.4   | 18.9  | 16.4   | 15.8   | 16.9   | 16.4   | 18.3   | 20.4   |
| Tmx2      | 29.4   | 27.9  | 20.4  | 34.7   | 25.3   | 35.2  | 25.5   | 23.9   | 24.2   | 24.8   | 25.5   | 24.5   |
| Tmx3      | 19.5   | 20.5  | 21.2  | 20.9   | 20.0   | 22.0  | 18.1   | 22.4   | 20.0   | 18.9   | 23.5   | 22.6   |
| Tmx4      | 10.0   | 10.5  | 11.0  | 13.4   | 11.5   | 11.8  | 11.5   | 8.6    | 10.2   | 10.0   | 11.5   | 10.6   |
| Tnc       | 24.9   | 33.1  | 47.9  | 20.3   | 28.6   | 16.2  | 41.1   | 42.3   | 31.6   | 16.6   | 26.9   | 27.6   |
| Tnf       | 0.9    | 0.1   | 0.1   | 6.9    | 13.3   | 0.1   | 2.7    | 0.3    | 0.4    | 0.8    | 0.2    | 0.7    |
| Tnfaip1   | 26.3   | 27.5  | 24.8  | 26.0   | 28.4   | 21.5  | 33.2   | 30.2   | 34.9   | 23.7   | 27.4   | 26.0   |
| Tnfaip2   | 28.0   | 33.4  | 41.0  | 36.2   | 55.4   | 26.0  | 44.0   | 42.5   | 38.6   | 43.5   | 36.0   | 40.4   |
| Tnfaip3   | 4.6    | 2.7   | 2.6   | 4.6    | 6.0    | 6.3   | 2.9    | 1.5    | 2.2    | 2.4    | 2.6    | 2.3    |
| Tnfaip6   | 4.6    | 6.0   | 7.4   | 1.5    | 5.0    | 2.1   | 6.8    | 5.7    | 5.7    | 4.4    | 4.0    | 5.8    |
| Tnfaip8   | 2.1    | 2.0   | 3.4   | 3.4    | 6.6    | 1.4   | 2.6    | 2.6    | 2.6    | 5.7    | 3.2    | 3.3    |
| Tnfaip8l1 | 0.5    | 0.4   | 0.5   | 0.2    | 0.5    | 0.2   | 0.7    | 0.4    | 0.5    | 0.2    | 0.1    | 0.2    |
| Tnfaip8l2 | 1.0    | 0.1   | 0.2   | 5.2    | 7.8    | 0.0   | 1.2    | 0.1    | 0.1    | 0.6    | 0.3    | 0.8    |
| Tnfaip8l3 | 0.0    | 0.0   | 0.0   | 0.0    | 0.0    | 0.0   | 0.0    | 0.0    | 0.0    | 0.0    | 0.0    | 0.0    |
| Tnfrsf10b | 12.3   | 12.6  | 12.4  | 10.8   | 13.1   | 13.2  | 13.8   | 10.6   | 12.6   | 12.7   | 13.6   | 11.4   |
| Tnfrsf11a | 0.1    | 0.0   | 0.0   | 0.8    | 1.5    | 0.0   | 0.1    | 0.1    | 0.1    | 0.1    | 0.1    | 0.1    |
| Tnfrsf11b | 26.7   | 22.3  | 15.3  | 37.5   | 33.3   | 27.0  | 32.3   | 8.1    | 25.0   | 21.8   | 26.1   | 25.6   |
| Tnfrsf12a | 63.6   | 43.0  | 26.6  | 59.1   | 55.4   | 40.7  | 73.1   | 38.7   | 61.1   | 88.4   | 63.7   | 54.9   |
| Tnfrsf13b | 0.0    | 0.0   | 0.0   | 0.1    | 0.4    | 0.0   | 0.0    | 0.0    | 0.2    | 0.0    | 0.0    | 0.0    |
| Tnfrsf13c | 0.0    | 0.0   | 0.0   | 0.0    | 0.0    | 0.0   | 0.0    | 0.0    | 0.0    | 0.0    | 0.0    | 0.0    |
| Tnfrsf14  | 2.4    | 2.2   | 2.7   | 3.8    | 2.1    | 3.1   | 2.5    | 2.8    | 3.0    | 1.6    | 1.9    | 1.9    |
| Tnfrsf18  | 0.6    | 1.7   | 1.7   | 0.5    | 2.5    | 1.5   | 1.1    | 0.5    | 0.7    | 0.6    | 0.8    | 0.7    |
| Tnfrsf19  | 0.0    | 0.0   | 0.1   | 0.1    | 0.0    | 0.0   | 0.0    | 0.0    | 0.0    | 0.0    | 0.0    | 0.0    |
| Tnfrsf1a  | 40.6   | 46.9  | 53.4  | 35.3   | 49.4   | 36.3  | 50.8   | 55.5   | 52.8   | 48.0   | 44.2   | 46.7   |
| Tnfrsf1b  | 17.9   | 15.0  | 14.4  | 20.7   | 29.5   | 12.4  | 20.9   | 13.9   | 17.9   | 16.1   | 14.3   | 18.4   |
| Tnfrsf21  | 1.1    | 0.6   | 0.6   | 2.0    | 1.9    | 1.1   | 1.0    | 0.6    | 0.6    | 1.2    | 0.8    | 0.6    |
| Tnfrsf22  | 1.8    | 1.6   | 1.1   | 1.9    | 1.6    | 1.8   | 1.8    | 1.5    | 1.7    | 1.3    | 1.9    | 1.7    |
| Tnfrsf23  | 9.6    | 7.6   | 6.2   | 13.3   | 10.4   | 9.5   | 9.8    | 5.7    | 6.1    | 9.5    | 8.7    | 9.2    |
| Tnfrsf25  | 0.6    | 1.4   | 0.8   | 0.6    | 0.7    | 0.7   | 1.3    | 1.9    | 1.6    | 0.8    | 0.9    | 0.9    |
| Tnfrsf26  | 44.0   | 35.8  | 25.5  | 44.1   | 41.7   | 37.8  | 29.2   | 15.2   | 20.2   | 29.3   | 27.2   | 29.0   |
| Tnfrsf4   | 0.2    | 0.1   | 0.1   | 0.2    | 0.1    | 0.2   | 0.1    | 0.0    | 0.2    | 0.0    | 0.1    | 0.1    |
| Tnfrsf8   | 0.1    | 0.1   | 0.0   | 0.0    | 0.1    | 0.1   | 0.2    | 0.2    | 0.0    | 0.1    | 0.1    | 0.1    |
| Tnfrsf9   | 0.1    | 0.1   | 0.1   | 0.2    | 0.2    | 0.3   | 0.0    | 0.0    | 0.1    | 0.1    | 0.0    | 0.0    |
| Tnfsf10   | 0.0    | 0.0   | 0.0   | 0.0    | 0.0    | 0.1   | 0.0    | 0.1    | 0.0    | 0.0    | 0.0    | 0.0    |
| Tnfsf11   | 0.0    | 0.1   | 0.1   | 0.0    | 0.0    | 0.0   | 0.1    | 0.1    | 0.1    | 0.1    | 0.1    | 0.1    |
| Tnfsf12   | 6.9    | 7.2   | 7.0   | 9.0    | 7.2    | 9.1   | 7.5    | 7.6    | 7.4    | 7.5    | 7.2    | 7.0    |
| Tnfsf13   | 1.1    | 2.6   | 1.8   | 3.6    | 2.2    | 1.6   | 1.6    | 2.1    | 1.8    | 3.3    | 2.4    | 2.0    |
| Tnfsf13b  | 0.7    | 0.7   | 1.0   | 1.1    | 1.4    | 0.3   | 1.3    | 0.8    | 0.7    | 1.4    | 0.8    | 1.6    |
| Tnfsf14   | 0.1    | 0.0   | 0.0   | 0.3    | 0.9    | 0.0   | 0.0    | 0.0    | 0.0    | 0.0    | 0.0    | 0.1    |
| Tnfsf15   | 0.8    | 0.5   | 0.7   | 0.2    | 0.1    | 0.1   | 0.0    | 0.1    | 0.1    | 0.3    | 0.2    | 0.9    |

Online Table 1

|          |      |       |       |      |      |      |       |       |       |      |       |       |
|----------|------|-------|-------|------|------|------|-------|-------|-------|------|-------|-------|
| Tnfsf18  | 2.8  | 0.9   | 0.2   | 2.6  | 1.0  | 1.1  | 0.3   | 0.2   | 0.2   | 0.4  | 0.6   | 0.3   |
| Tnfsf4   | 0.1  | 0.2   | 0.1   | 0.5  | 0.5  | 0.3  | 0.2   | 0.0   | 0.2   | 0.1  | 0.2   | 0.1   |
| Tnfsf8   | 0.0  | 0.0   | 0.0   | 0.2  | 0.2  | 0.0  | 0.1   | 0.0   | 0.0   | 0.0  | 0.1   | 0.0   |
| Tnfsf9   | 1.6  | 2.0   | 2.9   | 2.9  | 4.5  | 2.3  | 1.8   | 2.0   | 1.7   | 1.8  | 1.5   | 2.3   |
| Tnik     | 0.3  | 0.7   | 0.8   | 0.3  | 0.3  | 0.4  | 0.2   | 0.4   | 0.3   | 0.2  | 0.2   | 0.4   |
| Tnip1    | 19.7 | 15.6  | 24.0  | 31.4 | 41.4 | 19.8 | 31.4  | 20.5  | 18.4  | 15.9 | 17.5  | 23.5  |
| Tnip2    | 10.4 | 13.0  | 15.1  | 10.7 | 13.2 | 8.7  | 15.9  | 13.4  | 14.5  | 10.8 | 11.5  | 13.9  |
| Tnip3    | 0.3  | 0.0   | 0.0   | 1.8  | 4.2  | 0.0  | 0.6   | 0.1   | 0.1   | 0.4  | 0.2   | 0.4   |
| Tnk1     | 2.3  | 2.6   | 2.6   | 2.7  | 2.1  | 2.7  | 2.8   | 3.7   | 2.7   | 2.5  | 2.1   | 2.1   |
| Tnk2     | 7.9  | 6.9   | 4.9   | 7.7  | 5.8  | 6.8  | 7.5   | 4.9   | 7.4   | 9.4  | 7.9   | 5.2   |
| Tnks     | 13.5 | 19.1  | 20.5  | 13.1 | 15.2 | 12.4 | 16.7  | 19.2  | 21.2  | 14.5 | 14.8  | 16.6  |
| Tnks1bp1 | 50.5 | 54.2  | 53.1  | 45.7 | 48.8 | 35.4 | 70.1  | 67.1  | 61.4  | 59.3 | 62.5  | 56.4  |
| Tnks2    | 28.6 | 32.0  | 28.6  | 25.2 | 28.1 | 32.1 | 24.0  | 24.7  | 29.1  | 32.7 | 31.4  | 31.2  |
| Tnmd     | 0.1  | 0.0   | 0.1   | 0.0  | 0.1  | 0.3  | 0.2   | 0.3   | 0.2   | 0.5  | 1.2   | 0.3   |
| Tnn      | 0.0  | 0.0   | 0.0   | 0.0  | 0.0  | 0.0  | 0.0   | 0.0   | 0.0   | 0.0  | 0.0   | 0.0   |
| Tnnc1    | 2.5  | 2.3   | 2.0   | 1.4  | 1.1  | 2.4  | 1.6   | 1.9   | 0.9   | 1.1  | 1.2   | 1.2   |
| Tnnc2    | 0.2  | 0.0   | 0.3   | 0.0  | 0.2  | 0.1  | 0.1   | 0.1   | 0.1   | 0.1  | 0.0   | 0.0   |
| Tnni1    | 0.2  | 0.2   | 0.0   | 0.2  | 0.1  | 0.1  | 0.1   | 0.3   | 0.1   | 0.1  | 0.2   | 0.2   |
| Tnni3    | 0.2  | 0.4   | 0.3   | 0.1  | 0.1  | 0.1  | 0.6   | 0.4   | 0.2   | 0.2  | 0.6   | 0.2   |
| Tnni3k   | 0.2  | 0.1   | 0.0   | 0.2  | 0.2  | 0.1  | 0.1   | 0.2   | 0.1   | 0.1  | 0.1   | 0.1   |
| Tnnt1    | 0.2  | 0.2   | 0.7   | 0.4  | 0.3  | 0.4  | 0.2   | 0.7   | 0.3   | 0.1  | 0.1   | 0.2   |
| Tnnt2    | 8.2  | 7.5   | 8.6   | 2.9  | 2.3  | 3.1  | 2.9   | 14.8  | 2.6   | 6.3  | 9.2   | 11.4  |
| Tnnt3    | 0.5  | 0.5   | 0.6   | 0.3  | 0.6  | 0.7  | 0.2   | 0.2   | 0.4   | 0.3  | 0.7   | 0.4   |
| Tnpo1    | 29.7 | 29.6  | 25.1  | 29.3 | 28.4 | 33.7 | 26.2  | 27.9  | 25.5  | 28.3 | 30.8  | 28.3  |
| Tnpo2    | 34.3 | 29.3  | 24.2  | 33.6 | 31.4 | 32.1 | 32.8  | 25.7  | 30.8  | 28.9 | 32.5  | 29.3  |
| Tnpo3    | 21.5 | 20.0  | 19.8  | 19.0 | 19.6 | 20.1 | 20.6  | 21.5  | 19.0  | 22.1 | 23.5  | 21.2  |
| Tnr      | 0.0  | 0.0   | 0.0   | 0.0  | 0.0  | 0.0  | 0.0   | 0.0   | 0.0   | 0.0  | 0.0   | 0.0   |
| Tnrc18   | 3.9  | 7.1   | 7.1   | 3.4  | 4.7  | 2.9  | 7.2   | 6.8   | 8.3   | 7.3  | 5.8   | 5.7   |
| Tnrc6a   | 9.2  | 10.8  | 11.2  | 11.1 | 10.0 | 9.5  | 10.5  | 10.3  | 9.7   | 8.8  | 9.9   | 10.1  |
| Tnrc6b   | 3.1  | 4.1   | 4.3   | 3.5  | 3.2  | 3.5  | 3.5   | 3.8   | 3.1   | 3.3  | 3.3   | 3.4   |
| Tnrc6c   | 3.1  | 3.6   | 4.4   | 3.4  | 3.3  | 3.2  | 4.0   | 3.8   | 3.8   | 3.6  | 3.5   | 3.8   |
| Tns1     | 68.2 | 72.8  | 52.2  | 74.0 | 55.7 | 67.0 | 80.6  | 45.5  | 64.4  | 42.4 | 52.5  | 47.7  |
| Tns3     | 68.3 | 100.0 | 104.4 | 81.5 | 89.7 | 77.3 | 121.0 | 111.4 | 115.4 | 87.7 | 100.5 | 106.2 |
| Tns4     | 0.9  | 0.8   | 1.0   | 0.1  | 0.2  | 0.1  | 0.2   | 0.4   | 0.2   | 0.3  | 0.4   | 0.4   |
| Tnxb     | 1.2  | 1.3   | 0.9   | 1.1  | 0.6  | 1.1  | 0.4   | 0.6   | 0.2   | 0.4  | 0.4   | 0.2   |
| Tob1     | 5.1  | 6.0   | 7.3   | 5.8  | 4.9  | 5.3  | 5.3   | 6.8   | 4.8   | 5.5  | 5.7   | 5.5   |
| Tob2     | 3.8  | 4.5   | 4.4   | 4.5  | 4.5  | 4.6  | 5.0   | 4.8   | 4.4   | 3.9  | 4.2   | 3.3   |
| Toe1     | 5.9  | 6.1   | 5.6   | 4.8  | 6.0  | 4.6  | 6.3   | 5.8   | 5.9   | 6.2  | 5.3   | 6.6   |
| Tollip   | 27.5 | 25.9  | 22.3  | 28.2 | 25.4 | 27.6 | 25.5  | 21.2  | 24.4  | 24.3 | 23.5  | 23.0  |
| Tom1     | 15.1 | 12.0  | 10.8  | 17.9 | 13.2 | 15.6 | 13.2  | 12.3  | 11.6  | 12.4 | 11.9  | 12.9  |
| Tom111   | 5.6  | 5.2   | 5.5   | 4.8  | 3.6  | 5.0  | 3.5   | 4.3   | 3.8   | 4.2  | 5.1   | 5.1   |
| Tom112   | 11.7 | 12.6  | 10.8  | 11.7 | 10.5 | 11.6 | 11.5  | 9.6   | 11.1  | 12.9 | 10.0  | 10.2  |
| Tomm20   | 24.3 | 19.2  | 17.3  | 23.2 | 20.7 | 23.4 | 20.7  | 17.9  | 20.7  | 28.5 | 25.2  | 23.6  |
| Tomm22   | 74.5 | 68.7  | 63.7  | 73.8 | 68.2 | 66.7 | 65.7  | 65.2  | 68.9  | 73.3 | 67.4  | 69.4  |
| Tomm34   | 14.7 | 16.0  | 13.2  | 18.0 | 14.8 | 17.9 | 15.4  | 14.7  | 13.5  | 18.4 | 15.9  | 15.4  |
| Tomm40   | 28.0 | 24.8  | 19.2  | 27.0 | 25.7 | 25.2 | 26.8  | 22.9  | 23.1  | 24.3 | 24.7  | 21.2  |
| Tomm40l  | 6.3  | 5.7   | 4.4   | 6.5  | 5.9  | 7.0  | 5.9   | 4.9   | 5.9   | 4.7  | 5.5   | 5.1   |
| Tomm5    | 57.5 | 43.5  | 35.6  | 52.9 | 51.0 | 53.2 | 47.1  | 43.5  | 48.2  | 54.7 | 51.8  | 42.0  |
| Tomm6    | 26.6 | 23.9  | 19.3  | 26.9 | 26.3 | 22.2 | 21.4  | 26.9  | 22.9  | 24.8 | 25.2  | 23.2  |
| Tomm7    | 47.3 | 37.3  | 30.7  | 44.4 | 41.4 | 47.2 | 32.9  | 33.2  | 32.4  | 39.1 | 38.7  | 38.1  |
| Tomm70a  | 28.7 | 26.2  | 22.7  | 27.7 | 25.3 | 26.8 | 25.4  | 22.7  | 24.3  | 27.6 | 29.0  | 26.6  |
| Tomt     | 0.8  | 1.1   | 0.8   | 1.3  | 1.1  | 0.9  | 0.9   | 0.5   | 0.7   | 1.4  | 0.7   | 1.0   |
| Tonsl    | 0.5  | 0.7   | 1.4   | 0.4  | 1.3  | 0.6  | 1.4   | 0.8   | 1.4   | 0.8  | 0.9   | 0.9   |
| Top1     | 27.8 | 24.5  | 30.9  | 33.6 | 25.6 | 28.0 | 26.7  | 24.2  | 21.2  | 28.5 | 31.7  | 34.0  |
| Top1mt   | 6.3  | 5.0   | 4.3   | 5.8  | 4.3  | 6.4  | 4.9   | 4.5   | 3.9   | 3.5  | 5.6   | 5.1   |
| Top2a    | 9.0  | 18.2  | 30.0  | 3.1  | 24.2 | 3.2  | 28.9  | 12.2  | 24.2  | 12.7 | 20.6  | 15.0  |
| Top2b    | 29.9 | 32.9  | 33.8  | 29.9 | 28.6 | 28.8 | 28.8  | 29.7  | 29.6  | 30.9 | 34.8  | 33.5  |

Online Table 1



|          |       |       |       |       |       |       |       |       |       |       |       |       |
|----------|-------|-------|-------|-------|-------|-------|-------|-------|-------|-------|-------|-------|
| Top3a    | 2.3   | 1.9   | 2.1   | 2.2   | 2.9   | 1.9   | 2.3   | 2.1   | 2.0   | 1.9   | 1.8   | 2.0   |
| Top3b    | 15.9  | 16.4  | 14.9  | 15.6  | 13.5  | 14.8  | 13.6  | 13.2  | 13.7  | 15.4  | 14.6  | 14.4  |
| Topbp1   | 10.9  | 14.0  | 15.7  | 8.8   | 14.7  | 9.0   | 15.9  | 11.2  | 13.1  | 10.8  | 13.6  | 11.0  |
| Topors   | 17.6  | 18.6  | 21.9  | 19.5  | 15.7  | 16.2  | 17.7  | 17.1  | 15.3  | 18.6  | 20.2  | 21.8  |
| Tor1a    | 13.6  | 11.0  | 11.5  | 13.6  | 12.1  | 12.5  | 14.5  | 14.1  | 12.7  | 12.5  | 13.4  | 13.2  |
| Tor1aip1 | 14.7  | 14.2  | 15.1  | 17.3  | 15.8  | 15.2  | 18.9  | 16.8  | 15.9  | 12.2  | 15.3  | 16.7  |
| Tor1aip2 | 75.5  | 65.6  | 58.4  | 76.3  | 69.0  | 83.2  | 75.8  | 65.1  | 77.1  | 73.9  | 76.4  | 79.1  |
| Tor1b    | 25.0  | 23.9  | 22.5  | 23.5  | 25.4  | 25.0  | 23.2  | 24.5  | 24.8  | 27.6  | 25.4  | 24.8  |
| Tor2a    | 5.9   | 6.2   | 7.9   | 5.2   | 8.1   | 5.2   | 7.6   | 10.2  | 9.9   | 8.8   | 6.3   | 8.6   |
| Tor3a    | 15.5  | 11.0  | 12.7  | 22.9  | 16.0  | 19.4  | 12.5  | 11.7  | 10.1  | 9.9   | 11.2  | 14.2  |
| Tor4a    | 4.2   | 2.5   | 2.6   | 7.6   | 6.5   | 5.2   | 3.1   | 1.6   | 1.7   | 6.8   | 3.9   | 3.4   |
| Tox      | 0.1   | 0.1   | 0.2   | 0.0   | 0.0   | 0.0   | 0.1   | 0.1   | 0.1   | 0.1   | 0.0   | 0.1   |
| Tox4     | 14.9  | 15.8  | 15.6  | 16.1  | 15.3  | 15.0  | 14.7  | 15.4  | 14.2  | 16.1  | 16.1  | 15.8  |
| Tpbg     | 0.8   | 1.2   | 1.7   | 0.4   | 0.9   | 0.6   | 1.5   | 3.2   | 2.0   | 2.4   | 2.5   | 1.5   |
| Tpcn1    | 5.5   | 4.9   | 4.7   | 5.7   | 5.5   | 5.3   | 5.5   | 4.6   | 5.1   | 4.1   | 4.5   | 3.7   |
| Tpcn2    | 1.9   | 2.3   | 2.1   | 2.8   | 2.8   | 1.6   | 2.6   | 2.4   | 3.0   | 1.9   | 2.7   | 1.6   |
| Tpd52    | 12.7  | 11.6  | 7.9   | 24.5  | 25.0  | 18.6  | 9.7   | 5.9   | 6.4   | 11.1  | 11.9  | 9.2   |
| Tpd52l1  | 1.4   | 0.5   | 0.5   | 0.7   | 0.6   | 1.1   | 0.9   | 1.2   | 0.6   | 1.2   | 1.2   | 0.9   |
| Tpd52l2  | 37.5  | 36.8  | 33.4  | 36.4  | 31.9  | 38.4  | 37.6  | 35.8  | 34.5  | 37.2  | 41.9  | 37.7  |
| Tpgs1    | 10.4  | 10.5  | 10.1  | 10.5  | 10.4  | 9.5   | 11.0  | 13.8  | 11.0  | 12.6  | 10.1  | 10.0  |
| Tpgs2    | 4.5   | 3.7   | 3.6   | 4.4   | 3.8   | 4.9   | 3.4   | 3.7   | 3.2   | 3.9   | 4.6   | 3.3   |
| Tph2     | 0.1   | 0.0   | 0.0   | 0.0   | 0.0   | 0.0   | 0.1   | 0.1   | 0.0   | 0.0   | 0.1   | 0.1   |
| Tpi1     | 144.0 | 133.2 | 126.8 | 145.2 | 151.8 | 159.5 | 150.8 | 122.3 | 130.9 | 159.8 | 149.0 | 159.6 |
| Tpk1     | 3.7   | 3.3   | 1.8   | 3.8   | 2.8   | 3.7   | 1.9   | 1.8   | 2.0   | 2.5   | 2.5   | 2.0   |
| Tpm1     | 412.9 | 322.5 | 280.7 | 530.8 | 406.1 | 400.8 | 534.9 | 298.6 | 435.2 | 618.2 | 731.7 | 552.7 |
| Tpm2     | 58.3  | 47.1  | 42.0  | 69.7  | 47.1  | 58.2  | 108.5 | 43.5  | 73.7  | 91.0  | 137.8 | 98.9  |
| Tpm3     | 154.6 | 124.6 | 127.2 | 211.5 | 158.0 | 140.8 | 171.5 | 144.8 | 126.0 | 120.8 | 160.0 | 145.7 |
| Tpm4     | 561.8 | 570.7 | 545.1 | 743.4 | 596.8 | 598.5 | 737.8 | 571.8 | 643.2 | 533.4 | 741.6 | 641.7 |
| Tpmt     | 2.4   | 2.9   | 3.3   | 2.2   | 2.2   | 2.8   | 2.5   | 2.9   | 2.5   | 1.5   | 2.9   | 2.3   |
| Tpp1     | 42.4  | 37.9  | 31.2  | 46.1  | 39.6  | 51.4  | 25.5  | 29.9  | 21.5  | 31.9  | 28.0  | 28.7  |
| Tpp2     | 23.6  | 24.2  | 22.0  | 25.4  | 29.4  | 21.5  | 22.4  | 24.1  | 23.3  | 25.6  | 26.1  | 24.2  |
| Tppp     | 0.2   | 0.2   | 0.3   | 0.3   | 0.1   | 0.1   | 0.1   | 0.2   | 0.1   | 0.3   | 0.4   | 0.2   |
| Tppp3    | 0.7   | 0.5   | 0.6   | 1.2   | 0.8   | 0.6   | 0.4   | 0.5   | 0.5   | 0.3   | 0.4   | 0.7   |
| Tpr      | 39.6  | 37.8  | 39.6  | 41.9  | 36.4  | 35.7  | 38.6  | 37.7  | 32.0  | 34.3  | 44.3  | 42.8  |
| Tpra1    | 8.1   | 9.6   | 8.5   | 10.8  | 11.0  | 12.7  | 8.7   | 9.4   | 8.6   | 7.8   | 8.5   | 6.9   |
| Tprgl    | 66.4  | 54.5  | 45.7  | 69.4  | 55.3  | 67.2  | 56.0  | 52.8  | 60.6  | 63.5  | 65.1  | 59.6  |
| Tprkb    | 12.1  | 9.4   | 9.4   | 11.6  | 8.8   | 10.1  | 9.1   | 9.0   | 8.2   | 9.8   | 10.4  | 9.7   |
| Tprn     | 2.6   | 2.4   | 1.9   | 2.3   | 2.0   | 2.7   | 2.7   | 2.0   | 1.7   | 2.9   | 2.2   | 2.1   |
| Tpst1    | 24.6  | 28.7  | 37.5  | 14.1  | 24.3  | 20.1  | 28.0  | 30.7  | 25.6  | 26.5  | 25.5  | 26.1  |
| Tpst2    | 21.6  | 18.1  | 16.9  | 22.5  | 22.3  | 16.2  | 28.9  | 19.3  | 24.3  | 27.6  | 25.0  | 22.8  |
| Tpt1     | 781.8 | 665.3 | 680.5 | 635.9 | 709.2 | 729.3 | 626.0 | 853.7 | 789.5 | 856.6 | 811.8 | 820.5 |
| Tpte     | 0.0   | 0.0   | 0.0   | 0.0   | 0.0   | 0.0   | 0.0   | 0.0   | 0.0   | 0.0   | 0.0   | 0.0   |
| Tpx2     | 3.7   | 6.3   | 10.9  | 2.4   | 9.2   | 2.0   | 13.0  | 5.3   | 9.6   | 4.9   | 8.8   | 6.2   |
| Tra2a    | 30.0  | 27.9  | 32.8  | 31.9  | 30.3  | 24.2  | 30.6  | 30.6  | 30.4  | 34.6  | 35.7  | 36.7  |
| Tra2b    | 20.1  | 20.9  | 28.0  | 27.6  | 24.5  | 21.3  | 25.8  | 27.5  | 23.6  | 25.6  | 29.0  | 28.2  |
| Trabd    | 8.1   | 8.3   | 6.9   | 7.8   | 8.9   | 8.0   | 8.5   | 9.0   | 9.7   | 9.6   | 8.5   | 9.5   |
| Trabd2b  | 1.0   | 0.9   | 1.5   | 0.7   | 1.5   | 0.8   | 1.6   | 2.3   | 2.4   | 1.6   | 1.7   | 2.4   |
| Tradd    | 11.3  | 11.0  | 8.9   | 8.4   | 11.8  | 10.2  | 9.1   | 12.2  | 11.9  | 11.8  | 10.1  | 10.7  |
| Traf1    | 0.4   | 0.1   | 0.1   | 1.5   | 3.5   | 0.5   | 0.6   | 0.1   | 0.2   | 0.4   | 0.1   | 0.1   |
| Traf2    | 8.1   | 8.1   | 9.2   | 9.0   | 9.8   | 8.7   | 9.0   | 10.3  | 9.8   | 6.2   | 7.7   | 8.7   |
| Traf3    | 13.5  | 10.5  | 9.3   | 15.9  | 14.2  | 13.7  | 12.1  | 8.0   | 9.3   | 8.8   | 9.5   | 8.9   |
| Traf3ip1 | 2.4   | 2.5   | 3.2   | 2.6   | 2.2   | 2.5   | 2.9   | 2.8   | 2.2   | 2.8   | 2.6   | 3.1   |
| Traf3ip2 | 6.5   | 7.1   | 6.3   | 4.5   | 4.9   | 4.5   | 6.0   | 6.1   | 5.1   | 5.2   | 6.3   | 4.3   |
| Traf3ip3 | 0.2   | 0.2   | 0.2   | 0.5   | 1.6   | 0.2   | 0.3   | 0.3   | 0.2   | 0.3   | 0.2   | 0.2   |
| Traf4    | 6.7   | 7.9   | 7.2   | 6.9   | 8.1   | 7.0   | 7.7   | 8.2   | 8.2   | 9.1   | 8.3   | 6.1   |
| Traf5    | 2.3   | 2.2   | 1.8   | 2.6   | 3.3   | 2.4   | 3.5   | 2.4   | 3.2   | 3.3   | 4.1   | 3.2   |
| Traf6    | 3.4   | 3.5   | 3.1   | 3.4   | 3.2   | 3.8   | 3.0   | 3.1   | 3.0   | 3.2   | 3.0   | 3.2   |

Online Table 1

|          |      |      |      |      |      |      |      |      |      |       |      |      |
|----------|------|------|------|------|------|------|------|------|------|-------|------|------|
| Traf7    | 29.7 | 33.8 | 28.6 | 24.9 | 28.9 | 28.4 | 31.9 | 33.9 | 34.9 | 28.1  | 31.9 | 27.6 |
| Trafd1   | 23.3 | 26.5 | 25.6 | 22.7 | 22.9 | 22.6 | 20.3 | 24.9 | 22.1 | 21.1  | 20.7 | 21.7 |
| Traip    | 0.5  | 1.1  | 1.2  | 0.4  | 1.2  | 0.3  | 1.8  | 0.7  | 1.3  | 0.7   | 1.0  | 0.8  |
| Trak1    | 7.6  | 8.7  | 8.7  | 7.7  | 7.6  | 7.4  | 8.1  | 9.3  | 6.9  | 6.4   | 8.8  | 6.2  |
| Trak2    | 23.4 | 19.5 | 17.9 | 24.0 | 20.6 | 21.7 | 21.5 | 16.7 | 19.2 | 16.7  | 20.7 | 19.4 |
| Tram1    | 49.0 | 45.8 | 48.7 | 60.3 | 57.1 | 53.5 | 53.9 | 60.8 | 52.1 | 57.8  | 66.1 | 59.7 |
| Tram111  | 1.3  | 1.4  | 1.6  | 1.1  | 1.3  | 1.5  | 1.7  | 1.5  | 1.2  | 1.0   | 1.2  | 1.0  |
| Tram2    | 3.3  | 3.4  | 3.3  | 2.4  | 3.7  | 1.8  | 4.1  | 3.5  | 4.0  | 3.0   | 3.0  | 2.2  |
| Trank1   | 0.1  | 0.2  | 0.1  | 0.1  | 0.1  | 0.1  | 0.0  | 0.1  | 0.1  | 0.1   | 0.1  | 0.0  |
| Trap1    | 36.2 | 32.8 | 30.6 | 39.1 | 34.0 | 41.6 | 30.2 | 29.7 | 27.5 | 28.9  | 32.4 | 28.3 |
| Trappc1  | 30.0 | 29.3 | 29.3 | 30.5 | 29.5 | 27.4 | 31.4 | 36.7 | 30.6 | 29.8  | 38.4 | 32.2 |
| Trappc10 | 10.9 | 10.7 | 10.1 | 11.1 | 10.7 | 11.4 | 9.8  | 10.4 | 10.5 | 9.4   | 10.5 | 9.1  |
| Trappc11 | 13.9 | 14.4 | 13.2 | 15.0 | 14.0 | 14.5 | 11.8 | 12.6 | 13.4 | 13.3  | 13.1 | 14.3 |
| Trappc12 | 11.4 | 11.6 | 11.2 | 12.5 | 11.4 | 10.9 | 11.3 | 11.5 | 10.6 | 10.9  | 10.6 | 11.4 |
| Trappc13 | 18.2 | 19.2 | 16.5 | 18.3 | 18.2 | 19.5 | 17.4 | 18.5 | 19.2 | 20.7  | 19.6 | 19.9 |
| Trappc2  | 22.7 | 22.7 | 17.4 | 23.7 | 20.5 | 23.2 | 16.0 | 14.5 | 17.9 | 19.3  | 20.7 | 20.6 |
| Trappc2l | 56.2 | 47.4 | 35.1 | 51.8 | 41.2 | 53.8 | 38.2 | 37.9 | 42.2 | 50.9  | 46.4 | 41.8 |
| Trappc3  | 44.9 | 40.0 | 35.2 | 46.7 | 41.7 | 41.3 | 38.0 | 38.7 | 38.5 | 43.9  | 41.3 | 39.0 |
| Trappc4  | 46.5 | 40.4 | 26.6 | 45.6 | 37.4 | 37.0 | 35.9 | 33.7 | 40.0 | 37.1  | 36.6 | 32.6 |
| Trappc5  | 9.6  | 9.3  | 7.8  | 11.3 | 8.6  | 11.1 | 10.5 | 9.4  | 10.4 | 10.0  | 10.5 | 10.9 |
| Trappc6a | 36.8 | 27.4 | 18.2 | 31.3 | 25.3 | 31.7 | 18.1 | 21.2 | 23.8 | 24.2  | 24.6 | 21.6 |
| Trappc6b | 51.3 | 45.8 | 41.9 | 54.2 | 41.1 | 47.4 | 44.6 | 32.5 | 42.7 | 40.0  | 46.7 | 53.3 |
| Trappc8  | 16.5 | 17.3 | 14.2 | 16.6 | 17.7 | 16.5 | 14.0 | 13.4 | 16.4 | 15.2  | 16.4 | 16.6 |
| Trappc9  | 17.4 | 17.8 | 14.5 | 15.8 | 15.7 | 18.2 | 15.6 | 14.5 | 13.2 | 13.7  | 14.0 | 13.3 |
| Trcg1    | 0.0  | 0.0  | 0.0  | 0.0  | 0.0  | 0.0  | 0.0  | 0.0  | 0.0  | 0.0   | 0.0  | 0.0  |
| Trdmt1   | 1.2  | 1.2  | 1.5  | 1.8  | 1.2  | 1.8  | 1.2  | 1.4  | 1.2  | 1.2   | 1.5  | 1.0  |
| Trdn     | 0.1  | 0.1  | 0.0  | 0.1  | 0.0  | 0.1  | 0.1  | 0.0  | 0.0  | 0.0   | 0.1  | 0.0  |
| Trem1    | 0.2  | 0.0  | 0.0  | 1.3  | 2.7  | 0.0  | 0.2  | 0.0  | 0.0  | 0.1   | 0.1  | 0.2  |
| Trem2    | 3.6  | 0.1  | 0.1  | 35.3 | 37.4 | 0.0  | 2.4  | 0.8  | 0.3  | 2.4   | 0.5  | 1.7  |
| Trem3    | 0.0  | 0.0  | 0.0  | 0.3  | 0.5  | 0.1  | 0.1  | 0.0  | 0.0  | 0.0   | 0.1  | 0.0  |
| Trem14   | 0.4  | 0.0  | 0.0  | 0.6  | 2.6  | 0.0  | 0.3  | 0.0  | 0.0  | 0.2   | 0.0  | 0.0  |
| Tref1    | 0.2  | 0.4  | 0.6  | 0.3  | 0.9  | 0.4  | 0.4  | 0.6  | 0.3  | 0.4   | 0.3  | 0.2  |
| Trex1    | 8.3  | 7.8  | 7.4  | 9.8  | 10.1 | 7.5  | 9.0  | 11.2 | 9.1  | 8.2   | 7.6  | 8.7  |
| Trf      | 77.7 | 57.7 | 74.9 | 35.8 | 47.8 | 29.6 | 45.4 | 38.1 | 50.9 | 186.0 | 85.6 | 82.8 |
| Triap1   | 17.0 | 18.6 | 13.6 | 18.3 | 20.2 | 16.6 | 16.9 | 12.9 | 18.7 | 17.2  | 16.0 | 17.5 |
| Trib1    | 2.8  | 4.2  | 4.4  | 1.4  | 4.0  | 0.9  | 3.1  | 3.6  | 3.3  | 7.1   | 4.2  | 4.3  |
| Trib2    | 15.2 | 12.9 | 8.9  | 17.0 | 12.3 | 25.2 | 7.9  | 4.7  | 6.3  | 11.1  | 7.9  | 7.6  |
| Trib3    | 10.3 | 5.4  | 3.1  | 9.8  | 4.2  | 10.5 | 3.9  | 13.1 | 10.0 | 4.0   | 7.3  | 4.5  |
| Tril     | 0.1  | 0.3  | 0.5  | 0.1  | 0.2  | 0.1  | 0.2  | 0.8  | 0.6  | 0.2   | 0.1  | 0.2  |
| Trim10   | 0.0  | 0.0  | 0.0  | 0.0  | 0.0  | 0.0  | 0.0  | 0.0  | 0.0  | 0.0   | 0.0  | 0.0  |
| Trim11   | 16.3 | 16.6 | 15.7 | 13.4 | 13.9 | 14.0 | 16.0 | 13.0 | 15.1 | 16.9  | 15.0 | 13.9 |
| Trim12a  | 10.4 | 8.3  | 8.2  | 8.8  | 9.9  | 7.4  | 9.0  | 8.7  | 9.3  | 9.9   | 12.1 | 11.2 |
| Trim12c  | 13.5 | 11.8 | 13.0 | 13.1 | 13.5 | 10.1 | 8.7  | 9.7  | 10.6 | 10.5  | 12.4 | 14.2 |
| Trim13   | 4.8  | 4.8  | 4.6  | 4.3  | 4.5  | 5.4  | 5.7  | 5.2  | 4.6  | 4.0   | 4.5  | 5.8  |
| Trim14   | 0.2  | 0.3  | 0.2  | 1.2  | 1.1  | 0.1  | 0.1  | 0.3  | 0.0  | 0.0   | 0.0  | 0.1  |
| Trim15   | 0.1  | 0.1  | 0.2  | 0.1  | 0.1  | 0.1  | 0.0  | 0.2  | 0.1  | 0.1   | 0.0  | 0.0  |
| Trim16   | 24.4 | 24.8 | 15.2 | 29.1 | 26.7 | 20.4 | 27.2 | 18.9 | 22.3 | 20.9  | 24.2 | 20.6 |
| Trim17   | 0.2  | 0.3  | 0.2  | 0.0  | 0.2  | 0.3  | 0.1  | 0.2  | 0.2  | 0.1   | 0.2  | 0.1  |
| Trim2    | 5.6  | 5.0  | 5.8  | 5.9  | 4.6  | 6.6  | 4.9  | 6.2  | 4.4  | 6.6   | 6.4  | 5.5  |
| Trim21   | 4.8  | 3.8  | 4.0  | 5.0  | 5.0  | 4.0  | 3.4  | 3.3  | 3.3  | 4.2   | 3.6  | 5.3  |
| Trim23   | 5.5  | 7.0  | 6.7  | 5.9  | 5.4  | 6.4  | 4.5  | 5.5  | 5.8  | 6.8   | 6.6  | 6.7  |
| Trim24   | 6.4  | 6.5  | 6.2  | 5.8  | 5.9  | 5.3  | 6.1  | 4.5  | 6.6  | 7.1   | 8.0  | 7.9  |
| Trim25   | 5.5  | 5.2  | 6.2  | 6.5  | 7.4  | 5.1  | 5.1  | 4.2  | 4.6  | 4.3   | 4.0  | 5.6  |
| Trim26   | 11.8 | 12.1 | 10.5 | 12.8 | 10.5 | 13.0 | 11.3 | 9.8  | 9.7  | 10.5  | 12.1 | 11.8 |
| Trim27   | 7.6  | 7.1  | 6.5  | 6.6  | 7.1  | 6.5  | 7.9  | 7.5  | 7.3  | 8.1   | 8.2  | 6.3  |
| Trim28   | 26.2 | 31.3 | 27.3 | 22.7 | 25.8 | 25.2 | 28.5 | 31.3 | 31.6 | 32.1  | 29.4 | 26.7 |
| Trim29   | 0.2  | 0.1  | 0.1  | 0.2  | 0.1  | 0.1  | 0.1  | 0.1  | 0.1  | 0.1   | 0.2  | 0.1  |

Online Table 1

|         |      |      |      |      |      |      |      |      |      |      |      |      |
|---------|------|------|------|------|------|------|------|------|------|------|------|------|
| Trim3   | 12.6 | 13.9 | 13.4 | 12.4 | 11.4 | 15.1 | 13.1 | 13.1 | 13.5 | 10.5 | 12.0 | 11.1 |
| Trim30a | 7.1  | 6.5  | 7.7  | 8.6  | 7.3  | 5.8  | 5.7  | 4.5  | 3.9  | 3.0  | 4.0  | 7.8  |
| Trim30b | 0.0  | 0.0  | 0.0  | 0.0  | 0.0  | 0.0  | 0.0  | 0.0  | 0.1  | 0.0  | 0.1  | 0.0  |
| Trim30d | 3.8  | 3.7  | 4.2  | 4.2  | 3.1  | 3.3  | 3.9  | 2.3  | 2.6  | 2.8  | 2.5  | 4.9  |
| Trim32  | 9.4  | 9.9  | 8.6  | 7.1  | 8.4  | 8.3  | 7.2  | 7.7  | 9.5  | 9.6  | 8.1  | 8.0  |
| Trim33  | 4.7  | 5.1  | 5.1  | 4.6  | 4.5  | 5.0  | 4.4  | 4.5  | 4.4  | 5.4  | 5.5  | 5.4  |
| Trim34a | 5.9  | 4.3  | 5.2  | 6.5  | 4.5  | 5.1  | 4.0  | 3.0  | 4.2  | 3.8  | 4.3  | 6.3  |
| Trim34b | 3.0  | 1.9  | 2.2  | 2.2  | 2.2  | 2.3  | 1.9  | 1.4  | 2.2  | 1.6  | 1.8  | 3.2  |
| Trim35  | 52.4 | 50.3 | 42.0 | 56.4 | 47.5 | 49.5 | 45.0 | 55.3 | 50.6 | 50.0 | 49.0 | 41.1 |
| Trim36  | 0.0  | 0.1  | 0.0  | 0.1  | 0.1  | 0.0  | 0.1  | 0.0  | 0.0  | 0.0  | 0.0  | 0.0  |
| Trim37  | 8.0  | 6.6  | 6.1  | 7.5  | 6.5  | 9.3  | 5.6  | 5.3  | 4.6  | 5.2  | 5.7  | 5.3  |
| Trim38  | 0.1  | 0.1  | 0.1  | 0.1  | 0.1  | 0.0  | 0.0  | 0.1  | 0.1  | 0.1  | 0.1  | 0.1  |
| Trim39  | 4.6  | 3.9  | 4.3  | 5.7  | 3.8  | 4.6  | 4.7  | 3.5  | 4.0  | 3.7  | 4.1  | 3.9  |
| Trim41  | 9.3  | 9.0  | 8.8  | 11.4 | 9.1  | 10.0 | 9.6  | 7.7  | 8.9  | 8.7  | 9.3  | 9.9  |
| Trim43a | 0.1  | 0.3  | 0.2  | 0.0  | 0.2  | 0.0  | 0.1  | 0.1  | 0.0  | 0.1  | 0.3  | 0.0  |
| Trim43b | 0.1  | 0.3  | 0.1  | 0.1  | 0.2  | 0.1  | 0.2  | 0.2  | 0.1  | 0.1  | 0.1  | 0.0  |
| Trim43c | 0.3  | 0.4  | 0.2  | 0.2  | 0.2  | 0.1  | 0.2  | 0.2  | 0.2  | 0.1  | 0.4  | 0.1  |
| Trim44  | 22.4 | 21.4 | 22.6 | 23.2 | 19.3 | 21.5 | 21.4 | 20.1 | 20.3 | 22.1 | 24.3 | 26.0 |
| Trim45  | 3.1  | 2.8  | 2.3  | 2.9  | 1.9  | 3.6  | 1.3  | 1.4  | 1.6  | 2.4  | 2.2  | 2.1  |
| Trim46  | 2.9  | 2.5  | 2.2  | 2.9  | 2.3  | 3.3  | 2.8  | 3.5  | 3.6  | 2.2  | 2.3  | 2.0  |
| Trim47  | 16.4 | 16.5 | 17.6 | 19.6 | 21.9 | 19.8 | 16.8 | 23.1 | 21.0 | 16.0 | 14.6 | 14.7 |
| Trim50  | 0.0  | 0.0  | 0.0  | 0.0  | 0.0  | 0.0  | 0.0  | 0.0  | 0.0  | 0.1  | 0.0  | 0.0  |
| Trim54  | 0.2  | 0.0  | 0.0  | 0.1  | 0.0  | 0.1  | 0.0  | 0.0  | 0.0  | 0.0  | 0.0  | 0.0  |
| Trim56  | 10.1 | 8.3  | 8.4  | 13.5 | 10.9 | 10.7 | 9.0  | 7.5  | 7.6  | 7.5  | 8.3  | 8.7  |
| Trim59  | 5.0  | 8.9  | 9.3  | 4.7  | 7.7  | 5.5  | 8.7  | 8.6  | 10.5 | 9.8  | 11.4 | 9.8  |
| Trim6   | 0.3  | 0.2  | 0.4  | 0.3  | 0.2  | 0.2  | 0.4  | 0.1  | 0.3  | 0.3  | 0.2  | 0.2  |
| Trim62  | 0.5  | 0.8  | 1.0  | 0.5  | 0.7  | 0.7  | 0.8  | 0.8  | 0.8  | 0.5  | 0.7  | 0.5  |
| Trim63  | 0.5  | 0.3  | 0.4  | 0.2  | 0.1  | 0.3  | 0.0  | 0.1  | 0.0  | 0.0  | 0.1  | 0.1  |
| Trim65  | 0.6  | 0.6  | 0.5  | 0.8  | 0.6  | 0.6  | 0.7  | 0.4  | 0.6  | 0.8  | 0.4  | 0.6  |
| Trim66  | 0.3  | 0.2  | 0.2  | 0.4  | 0.1  | 0.3  | 0.1  | 0.3  | 0.2  | 0.1  | 0.2  | 0.1  |
| Trim68  | 3.6  | 3.7  | 4.1  | 3.1  | 2.9  | 3.8  | 3.2  | 3.4  | 3.7  | 2.8  | 3.4  | 3.5  |
| Trim69  | 0.1  | 0.3  | 0.1  | 0.3  | 0.2  | 0.1  | 0.2  | 0.0  | 0.1  | 0.2  | 0.2  | 0.1  |
| Trim7   | 2.3  | 3.2  | 3.3  | 1.5  | 2.2  | 3.2  | 3.0  | 2.5  | 2.3  | 1.9  | 2.9  | 2.2  |
| Trim71  | 0.0  | 0.0  | 0.0  | 0.1  | 0.0  | 0.1  | 0.0  | 0.1  | 0.1  | 0.0  | 0.1  | 0.0  |
| Trim72  | 0.1  | 0.0  | 0.0  | 0.0  | 0.1  | 0.0  | 0.0  | 0.0  | 0.0  | 0.0  | 0.0  | 0.1  |
| Trim75  | 0.1  | 0.0  | 0.0  | 0.1  | 0.0  | 0.0  | 0.0  | 0.0  | 0.0  | 0.1  | 0.0  | 0.0  |
| Trim8   | 9.2  | 7.9  | 8.1  | 9.7  | 12.1 | 8.0  | 10.1 | 9.1  | 9.1  | 10.1 | 8.5  | 8.0  |
| Trim9   | 0.0  | 0.0  | 0.0  | 0.0  | 0.0  | 0.0  | 0.0  | 0.0  | 0.0  | 0.0  | 0.0  | 0.0  |
| Trio    | 8.1  | 7.7  | 7.0  | 7.5  | 8.3  | 7.4  | 9.1  | 6.6  | 7.2  | 8.7  | 8.2  | 7.3  |
| Triobp  | 15.1 | 18.1 | 16.3 | 15.1 | 14.4 | 13.3 | 20.4 | 15.9 | 20.0 | 14.3 | 15.4 | 16.1 |
| Trip10  | 21.2 | 23.9 | 25.6 | 22.4 | 18.9 | 23.4 | 25.6 | 25.5 | 22.4 | 20.0 | 22.5 | 22.2 |
| Trip11  | 12.0 | 12.6 | 13.0 | 11.9 | 12.3 | 10.6 | 12.9 | 12.7 | 12.1 | 12.5 | 14.6 | 14.9 |
| Trip12  | 33.6 | 35.6 | 34.4 | 31.0 | 33.1 | 32.2 | 30.5 | 32.8 | 31.7 | 32.7 | 35.1 | 35.3 |
| Trip13  | 1.3  | 2.5  | 3.5  | 0.9  | 2.7  | 0.8  | 3.7  | 2.7  | 2.6  | 2.1  | 2.2  | 2.0  |
| Trip4   | 8.3  | 8.9  | 8.9  | 7.9  | 7.7  | 8.2  | 7.2  | 8.1  | 7.2  | 8.3  | 7.8  | 8.6  |
| Trip6   | 22.1 | 24.5 | 21.0 | 20.5 | 19.0 | 20.0 | 22.8 | 21.7 | 22.6 | 20.6 | 19.3 | 17.4 |
| Triqk   | 5.7  | 6.2  | 4.3  | 5.0  | 5.5  | 7.3  | 5.4  | 5.6  | 6.1  | 5.9  | 6.7  | 6.5  |
| Trit1   | 4.4  | 4.2  | 3.1  | 4.0  | 3.2  | 4.7  | 3.3  | 3.2  | 3.7  | 4.6  | 3.9  | 4.1  |
| Trmt1   | 14.5 | 12.6 | 11.3 | 12.0 | 11.7 | 14.7 | 12.2 | 11.2 | 12.1 | 13.5 | 12.9 | 11.5 |
| Trmt10a | 3.4  | 2.4  | 2.4  | 3.1  | 2.9  | 2.3  | 3.1  | 2.4  | 2.2  | 2.7  | 3.3  | 2.4  |
| Trmt10b | 3.0  | 3.3  | 3.4  | 3.7  | 2.8  | 3.2  | 2.6  | 2.8  | 2.8  | 3.1  | 3.2  | 3.0  |
| Trmt10c | 8.7  | 9.1  | 8.7  | 10.6 | 9.1  | 9.1  | 8.7  | 7.2  | 7.6  | 9.5  | 11.1 | 9.7  |
| Trmt11  | 2.6  | 3.2  | 2.8  | 2.6  | 2.3  | 2.9  | 2.0  | 2.2  | 1.9  | 2.5  | 2.5  | 2.8  |
| Trmt112 | 26.0 | 24.1 | 22.2 | 26.1 | 23.3 | 27.0 | 22.4 | 25.0 | 24.8 | 25.2 | 23.3 | 25.0 |
| Trmt12  | 1.9  | 2.0  | 1.6  | 2.1  | 1.4  | 1.8  | 1.8  | 1.8  | 2.1  | 1.6  | 1.5  | 1.9  |
| Trmt13  | 2.6  | 2.1  | 1.9  | 2.3  | 1.9  | 2.0  | 1.7  | 1.4  | 1.9  | 1.6  | 1.4  | 1.9  |
| Trmt1l  | 12.5 | 14.5 | 13.8 | 13.0 | 12.6 | 13.6 | 13.9 | 12.7 | 12.2 | 13.2 | 14.6 | 14.1 |

Online Table 1

|           |      |      |      |      |      |      |      |      |      |       |      |      |
|-----------|------|------|------|------|------|------|------|------|------|-------|------|------|
| Trmt2a    | 8.8  | 9.2  | 8.1  | 10.6 | 8.1  | 9.8  | 9.1  | 8.5  | 8.6  | 8.5   | 9.3  | 8.3  |
| Trmt2b    | 7.3  | 6.6  | 7.0  | 7.5  | 6.9  | 6.7  | 6.1  | 6.6  | 6.5  | 7.7   | 6.6  | 9.0  |
| Trmt44    | 2.0  | 1.9  | 1.7  | 2.2  | 2.2  | 2.3  | 1.5  | 1.6  | 1.8  | 2.1   | 1.9  | 1.7  |
| Trmt5     | 8.7  | 8.7  | 6.8  | 7.6  | 6.9  | 7.5  | 7.5  | 6.0  | 6.8  | 6.6   | 7.5  | 7.8  |
| Trmt6     | 7.2  | 6.4  | 7.6  | 9.2  | 6.7  | 7.1  | 7.4  | 7.6  | 6.4  | 7.3   | 8.2  | 8.6  |
| Trmt61a   | 4.1  | 2.3  | 1.8  | 3.9  | 3.9  | 3.6  | 3.7  | 2.8  | 2.8  | 3.3   | 2.8  | 2.8  |
| Trmt61b   | 2.1  | 2.4  | 1.6  | 2.9  | 2.4  | 2.3  | 2.8  | 2.3  | 2.9  | 3.0   | 2.2  | 1.9  |
| Trmu      | 4.0  | 3.1  | 3.3  | 3.3  | 3.3  | 3.3  | 2.9  | 3.5  | 4.1  | 3.5   | 3.3  | 3.4  |
| Trnau1ap  | 27.0 | 22.3 | 18.7 | 21.1 | 22.0 | 23.5 | 20.5 | 19.8 | 19.8 | 21.3  | 21.8 | 20.1 |
| Trnp1     | 26.5 | 17.1 | 12.4 | 29.4 | 15.5 | 33.2 | 18.1 | 15.2 | 19.5 | 19.2  | 19.2 | 21.3 |
| Trnt1     | 13.6 | 14.4 | 13.6 | 11.7 | 12.8 | 13.6 | 13.8 | 12.9 | 13.3 | 12.8  | 15.1 | 16.5 |
| Tro       | 0.4  | 0.8  | 1.0  | 0.5  | 0.3  | 0.7  | 0.9  | 0.9  | 0.8  | 0.5   | 0.7  | 0.5  |
| Troap     | 0.4  | 0.6  | 1.1  | 0.1  | 0.9  | 0.1  | 1.8  | 0.7  | 1.5  | 0.3   | 0.6  | 0.5  |
| Trove2    | 5.2  | 5.2  | 5.9  | 5.9  | 4.7  | 6.6  | 5.7  | 5.7  | 5.0  | 6.3   | 6.9  | 6.6  |
| Trp53     | 21.4 | 20.2 | 19.2 | 25.8 | 28.2 | 23.5 | 27.1 | 22.4 | 19.8 | 18.6  | 20.5 | 17.1 |
| Trp53bp1  | 7.4  | 8.4  | 9.2  | 7.9  | 7.8  | 8.3  | 7.3  | 8.3  | 7.0  | 8.8   | 8.0  | 8.5  |
| Trp53bp2  | 5.2  | 6.3  | 5.6  | 4.6  | 4.1  | 4.3  | 5.0  | 4.9  | 4.9  | 6.0   | 6.7  | 5.4  |
| Trp53i11  | 2.0  | 1.5  | 1.9  | 1.5  | 1.5  | 1.9  | 1.3  | 1.5  | 1.8  | 0.8   | 0.7  | 0.8  |
| Trp53i13  | 4.8  | 5.5  | 4.6  | 6.0  | 5.6  | 6.3  | 5.4  | 5.7  | 5.6  | 5.4   | 4.3  | 4.8  |
| Trp53inp1 | 42.2 | 55.9 | 61.8 | 40.4 | 39.7 | 50.9 | 33.5 | 34.7 | 39.7 | 50.8  | 48.8 | 51.7 |
| Trp53inp2 | 31.1 | 41.7 | 41.0 | 36.5 | 38.6 | 35.8 | 37.9 | 29.4 | 28.8 | 20.9  | 25.3 | 20.3 |
| Trp53rk   | 0.8  | 0.9  | 0.7  | 0.6  | 0.9  | 0.8  | 0.9  | 0.8  | 0.8  | 0.9   | 0.9  | 0.9  |
| Trp53tg5  | 0.0  | 0.0  | 0.0  | 0.0  | 0.0  | 0.0  | 0.0  | 0.1  | 0.0  | 0.0   | 0.1  | 0.0  |
| Trp63     | 0.0  | 0.0  | 0.0  | 0.1  | 0.1  | 0.0  | 0.0  | 0.0  | 0.0  | 0.0   | 0.0  | 0.0  |
| Trp73     | 0.0  | 0.0  | 0.0  | 0.0  | 0.0  | 0.0  | 0.0  | 0.0  | 0.0  | 0.0   | 0.0  | 0.0  |
| Trpc1     | 3.6  | 3.6  | 3.2  | 3.5  | 2.9  | 2.7  | 3.3  | 3.0  | 3.9  | 2.7   | 4.3  | 3.1  |
| Trpc2     | 0.5  | 0.4  | 0.7  | 0.4  | 0.5  | 0.6  | 0.5  | 0.6  | 0.5  | 0.6   | 0.4  | 0.3  |
| Trpc4ap   | 32.5 | 34.4 | 32.3 | 33.8 | 35.3 | 32.1 | 35.1 | 37.6 | 33.7 | 37.9  | 35.2 | 35.5 |
| Trpc5     | 0.0  | 0.0  | 0.0  | 0.0  | 0.0  | 0.0  | 0.0  | 0.0  | 0.0  | 0.0   | 0.0  | 0.0  |
| Trpc6     | 0.0  | 0.1  | 0.0  | 0.0  | 0.0  | 0.0  | 0.0  | 0.0  | 0.0  | 0.1   | 0.0  | 0.1  |
| Trpc7     | 0.0  | 0.0  | 0.0  | 0.0  | 0.0  | 0.0  | 0.0  | 0.0  | 0.0  | 0.1   | 0.1  | 0.0  |
| Trpm2     | 0.0  | 0.0  | 0.0  | 0.2  | 0.6  | 0.0  | 0.1  | 0.0  | 0.0  | 0.1   | 0.0  | 0.0  |
| Trpm3     | 0.1  | 0.0  | 0.0  | 0.1  | 0.0  | 0.1  | 0.1  | 0.0  | 0.1  | 0.1   | 0.1  | 0.1  |
| Trpm4     | 2.2  | 2.4  | 2.3  | 1.9  | 2.5  | 2.6  | 2.2  | 2.9  | 3.2  | 2.3   | 2.3  | 2.3  |
| Trpm5     | 0.0  | 0.1  | 0.0  | 0.0  | 0.0  | 0.1  | 0.1  | 0.1  | 0.0  | 0.0   | 0.0  | 0.0  |
| Trpm6     | 0.5  | 0.5  | 0.6  | 0.2  | 0.5  | 0.3  | 0.4  | 0.5  | 0.5  | 0.4   | 0.4  | 0.5  |
| Trpm7     | 15.1 | 14.7 | 14.0 | 14.0 | 15.0 | 14.0 | 13.9 | 14.8 | 14.7 | 16.7  | 16.6 | 16.9 |
| Trps1     | 2.5  | 3.0  | 3.9  | 2.7  | 3.3  | 2.6  | 2.4  | 4.1  | 2.5  | 2.7   | 2.4  | 3.4  |
| Trpi1     | 3.5  | 4.7  | 4.9  | 3.8  | 2.7  | 4.5  | 3.7  | 3.5  | 4.3  | 3.4   | 3.5  | 3.4  |
| Trpv1     | 0.0  | 0.0  | 0.0  | 0.1  | 0.0  | 0.0  | 0.0  | 0.0  | 0.0  | 0.0   | 0.0  | 0.0  |
| Trpv2     | 2.0  | 1.5  | 1.2  | 8.1  | 11.0 | 2.0  | 3.2  | 1.4  | 2.0  | 2.1   | 2.8  | 2.0  |
| Trpv3     | 0.0  | 0.0  | 0.0  | 0.0  | 0.0  | 0.0  | 0.0  | 0.0  | 0.0  | 0.0   | 0.0  | 0.0  |
| Trpv4     | 0.2  | 0.3  | 0.7  | 0.1  | 0.4  | 0.2  | 0.2  | 0.4  | 0.3  | 0.2   | 0.2  | 0.2  |
| Trpv6     | 0.0  | 0.0  | 0.0  | 0.0  | 0.0  | 0.0  | 0.0  | 0.0  | 0.0  | 0.0   | 0.0  | 0.0  |
| Trrap     | 7.2  | 9.0  | 8.8  | 6.7  | 8.0  | 8.0  | 8.4  | 9.0  | 7.9  | 7.7   | 6.9  | 6.5  |
| Trub1     | 1.9  | 1.7  | 1.5  | 1.6  | 1.7  | 1.9  | 1.8  | 1.3  | 1.6  | 1.5   | 1.8  | 1.4  |
| Trub2     | 5.8  | 4.8  | 3.8  | 6.2  | 4.8  | 5.8  | 4.9  | 4.6  | 4.6  | 4.7   | 4.6  | 4.0  |
| Tsacc     | 2.6  | 3.0  | 3.1  | 3.9  | 2.3  | 2.6  | 1.9  | 2.0  | 2.0  | 2.8   | 2.2  | 2.1  |
| Tsc1      | 4.3  | 4.6  | 4.4  | 4.2  | 4.0  | 4.3  | 4.0  | 4.1  | 3.6  | 3.7   | 4.2  | 4.1  |
| Tsc2      | 13.6 | 14.2 | 12.2 | 14.1 | 13.5 | 15.6 | 13.6 | 12.0 | 12.4 | 10.6  | 11.1 | 9.3  |
| Tsc22d1   | 49.7 | 31.3 | 26.5 | 53.5 | 35.1 | 46.3 | 36.6 | 41.7 | 50.4 | 126.1 | 73.6 | 57.2 |
| Tsc22d2   | 15.9 | 16.9 | 13.6 | 16.9 | 11.3 | 18.4 | 14.3 | 9.5  | 12.3 | 12.1  | 15.7 | 12.8 |
| Tsc22d3   | 12.3 | 10.5 | 8.3  | 12.5 | 9.1  | 14.2 | 11.2 | 14.4 | 15.6 | 7.9   | 13.6 | 8.4  |
| Tsc22d4   | 10.2 | 10.9 | 12.6 | 12.7 | 13.2 | 11.6 | 11.8 | 14.0 | 13.6 | 13.6  | 11.1 | 10.8 |
| Tsen15    | 13.0 | 14.0 | 14.4 | 14.7 | 15.2 | 14.9 | 16.2 | 16.6 | 15.4 | 15.5  | 17.7 | 16.2 |
| Tsen2     | 4.5  | 4.4  | 3.6  | 4.3  | 4.0  | 4.9  | 3.7  | 4.1  | 3.3  | 3.6   | 4.0  | 3.0  |
| Tsen34    | 43.0 | 41.1 | 40.8 | 38.3 | 34.6 | 43.3 | 40.9 | 43.0 | 41.7 | 42.6  | 38.4 | 37.5 |

Online Table 1

|          |       |      |      |       |       |       |      |      |       |       |       |      |
|----------|-------|------|------|-------|-------|-------|------|------|-------|-------|-------|------|
| Tsen54   | 6.4   | 6.1  | 5.6  | 7.3   | 7.2   | 5.7   | 5.9  | 5.4  | 6.9   | 6.3   | 5.5   | 4.8  |
| Tsfm     | 9.8   | 8.2  | 7.8  | 8.4   | 8.7   | 9.6   | 8.9  | 7.0  | 9.7   | 8.4   | 6.8   | 6.5  |
| Tsg101   | 46.9  | 51.8 | 43.9 | 51.1  | 41.7  | 47.0  | 41.5 | 41.2 | 40.6  | 41.8  | 47.8  | 39.9 |
| Tsga10   | 0.9   | 1.2  | 1.1  | 0.7   | 0.9   | 1.1   | 1.0  | 0.8  | 0.7   | 0.8   | 0.8   | 1.2  |
| Tsga14   | 2.2   | 2.4  | 1.9  | 2.6   | 2.4   | 2.7   | 2.0  | 1.9  | 1.9   | 2.4   | 2.4   | 2.1  |
| Tshr     | 0.2   | 0.1  | 0.3  | 0.2   | 0.3   | 0.2   | 0.2  | 0.1  | 0.2   | 0.1   | 0.1   | 0.1  |
| Tshz1    | 4.3   | 4.9  | 5.9  | 5.9   | 4.2   | 6.9   | 4.8  | 4.6  | 4.1   | 4.3   | 4.5   | 4.9  |
| Tshz2    | 0.6   | 1.0  | 1.3  | 0.8   | 0.3   | 0.5   | 0.4  | 0.9  | 0.3   | 1.7   | 1.9   | 0.9  |
| Tshz3    | 2.1   | 3.3  | 3.7  | 2.5   | 2.7   | 2.7   | 3.8  | 3.3  | 3.1   | 3.2   | 3.6   | 2.9  |
| Tsks     | 0.0   | 0.0  | 0.0  | 0.0   | 0.0   | 0.0   | 0.1  | 0.0  | 0.0   | 0.0   | 0.0   | 0.1  |
| Tsku     | 23.3  | 21.2 | 16.2 | 22.7  | 24.4  | 22.1  | 29.7 | 24.7 | 21.3  | 18.6  | 20.0  | 18.1 |
| Tslp     | 1.6   | 2.0  | 1.4  | 2.5   | 1.4   | 3.5   | 0.8  | 0.9  | 0.9   | 1.0   | 0.9   | 0.4  |
| Tsn      | 27.2  | 25.8 | 22.4 | 27.8  | 25.7  | 28.1  | 22.4 | 23.1 | 23.5  | 25.8  | 24.1  | 23.4 |
| Tsnax    | 40.2  | 38.3 | 34.1 | 43.5  | 35.7  | 44.3  | 32.7 | 27.5 | 31.1  | 35.2  | 33.9  | 32.7 |
| Tsnaxip1 | 0.0   | 0.0  | 0.1  | 0.0   | 0.0   | 0.0   | 0.0  | 0.1  | 0.0   | 0.0   | 0.0   | 0.0  |
| Tspan1   | 0.0   | 0.1  | 0.0  | 0.0   | 0.0   | 0.0   | 0.1  | 0.0  | 0.1   | 0.0   | 0.1   | 0.0  |
| Tspan10  | 0.0   | 0.0  | 0.0  | 0.0   | 0.0   | 0.0   | 0.0  | 0.0  | 0.0   | 0.0   | 0.0   | 0.0  |
| Tspan11  | 0.0   | 0.0  | 0.0  | 0.0   | 0.0   | 0.0   | 0.0  | 0.0  | 0.0   | 0.0   | 0.0   | 0.0  |
| Tspan12  | 5.6   | 7.9  | 7.1  | 7.1   | 7.6   | 6.0   | 6.7  | 5.1  | 7.9   | 5.2   | 7.0   | 6.5  |
| Tspan13  | 0.3   | 0.1  | 0.1  | 0.3   | 0.2   | 0.0   | 0.2  | 0.7  | 0.5   | 0.2   | 0.1   | 0.1  |
| Tspan14  | 3.9   | 4.8  | 4.2  | 5.6   | 8.2   | 3.3   | 4.4  | 4.8  | 5.8   | 4.2   | 4.4   | 3.6  |
| Tspan15  | 0.6   | 0.3  | 0.3  | 0.5   | 0.2   | 0.4   | 0.3  | 0.3  | 0.3   | 0.3   | 0.3   | 0.2  |
| Tspan17  | 38.8  | 38.2 | 29.6 | 48.8  | 36.9  | 39.5  | 35.8 | 36.8 | 36.1  | 28.2  | 31.6  | 29.3 |
| Tspan18  | 0.3   | 0.4  | 0.7  | 0.1   | 0.6   | 0.3   | 0.6  | 0.6  | 0.7   | 0.4   | 0.3   | 0.6  |
| Tspan2   | 2.5   | 2.3  | 2.1  | 2.6   | 2.0   | 3.3   | 2.5  | 1.4  | 2.2   | 3.7   | 4.7   | 2.8  |
| Tspan3   | 90.7  | 79.7 | 79.2 | 75.2  | 74.9  | 84.9  | 83.2 | 95.0 | 104.0 | 106.2 | 104.2 | 94.9 |
| Tspan31  | 65.2  | 58.9 | 57.0 | 71.4  | 65.9  | 60.2  | 63.8 | 64.4 | 58.1  | 68.2  | 65.7  | 61.8 |
| Tspan32  | 2.1   | 1.9  | 1.2  | 1.7   | 1.5   | 1.1   | 1.8  | 2.0  | 1.9   | 1.3   | 2.2   | 1.0  |
| Tspan33  | 0.1   | 0.0  | 0.1  | 0.1   | 0.0   | 0.0   | 0.1  | 0.0  | 0.0   | 0.4   | 0.1   | 0.1  |
| Tspan4   | 64.7  | 81.9 | 74.2 | 61.5  | 81.1  | 62.2  | 82.0 | 97.4 | 97.1  | 97.9  | 67.4  | 79.4 |
| Tspan5   | 7.0   | 6.8  | 5.4  | 5.0   | 4.0   | 5.8   | 4.1  | 4.1  | 4.2   | 12.2  | 7.9   | 7.2  |
| Tspan6   | 34.3  | 37.1 | 36.6 | 30.4  | 36.2  | 29.9  | 36.6 | 32.1 | 42.4  | 36.7  | 38.2  | 41.5 |
| Tspan7   | 5.2   | 8.8  | 12.5 | 3.2   | 7.3   | 2.7   | 4.4  | 7.4  | 7.1   | 3.5   | 4.6   | 4.9  |
| Tspan8   | 0.1   | 0.0  | 0.0  | 0.0   | 0.0   | 0.0   | 0.0  | 0.2  | 0.0   | 0.8   | 0.6   | 0.4  |
| Tspan9   | 24.9  | 25.6 | 25.0 | 35.6  | 24.3  | 37.8  | 26.3 | 25.4 | 24.7  | 18.0  | 17.5  | 18.0 |
| Tspo     | 113.0 | 84.6 | 65.9 | 123.0 | 123.6 | 120.2 | 77.2 | 82.7 | 87.4  | 83.0  | 62.8  | 75.3 |
| Tspyl1   | 26.2  | 29.1 | 26.2 | 26.5  | 26.3  | 24.5  | 23.2 | 22.7 | 26.7  | 29.5  | 26.6  | 27.2 |
| Tspyl2   | 18.2  | 16.7 | 20.4 | 22.7  | 12.6  | 22.3  | 17.8 | 14.8 | 15.0  | 15.9  | 17.8  | 18.7 |
| Tspyl3   | 1.6   | 2.7  | 2.3  | 2.1   | 2.2   | 2.4   | 1.8  | 2.3  | 2.2   | 2.0   | 1.7   | 2.2  |
| Tspyl4   | 4.0   | 2.4  | 1.8  | 4.6   | 1.9   | 4.4   | 2.2  | 2.6  | 2.2   | 2.0   | 3.2   | 2.2  |
| Tspyl5   | 0.9   | 1.2  | 1.1  | 0.9   | 0.6   | 1.0   | 0.8  | 1.1  | 0.9   | 1.0   | 1.3   | 1.0  |
| Tsr1     | 14.3  | 9.5  | 9.2  | 14.6  | 12.7  | 11.7  | 11.8 | 8.8  | 9.6   | 12.6  | 12.7  | 12.1 |
| Tsr2     | 4.8   | 4.9  | 5.0  | 7.5   | 4.7   | 6.6   | 6.7  | 4.9  | 4.9   | 5.7   | 5.9   | 6.1  |
| Tsr3     | 14.1  | 10.4 | 10.4 | 17.7  | 9.7   | 13.9  | 12.0 | 11.0 | 9.6   | 11.0  | 10.9  | 12.9 |
| Tssc1    | 8.6   | 7.9  | 7.3  | 9.8   | 7.9   | 7.9   | 6.9  | 8.4  | 7.8   | 8.2   | 8.0   | 7.0  |
| Tssc4    | 14.0  | 11.2 | 9.4  | 10.9  | 10.1  | 11.0  | 12.7 | 11.2 | 11.8  | 14.1  | 12.4  | 10.7 |
| Tssk1    | 0.0   | 0.2  | 0.0  | 0.3   | 0.0   | 0.0   | 0.1  | 0.1  | 0.0   | 0.1   | 0.1   | 0.1  |
| Tssk2    | 0.0   | 0.1  | 0.0  | 0.1   | 0.1   | 0.1   | 0.1  | 0.0  | 0.1   | 0.1   | 0.0   | 0.1  |
| Tssk3    | 0.0   | 0.0  | 0.0  | 0.0   | 0.0   | 0.1   | 0.1  | 0.0  | 0.0   | 0.0   | 0.0   | 0.0  |
| Tssk4    | 0.0   | 0.3  | 0.2  | 0.2   | 0.1   | 0.1   | 0.3  | 0.1  | 0.2   | 0.1   | 0.2   | 0.2  |
| Tssk6    | 0.2   | 0.1  | 0.3  | 0.3   | 0.3   | 0.3   | 0.1  | 0.5  | 0.4   | 0.2   | 0.2   | 0.2  |
| Tst      | 4.1   | 5.1  | 5.8  | 2.0   | 2.0   | 3.4   | 2.8  | 4.6  | 3.8   | 5.5   | 4.6   | 4.1  |
| Tsta3    | 14.0  | 13.1 | 11.1 | 13.3  | 12.0  | 15.1  | 13.2 | 13.0 | 12.9  | 11.2  | 12.7  | 12.5 |
| Tstd1    | 0.0   | 0.1  | 0.1  | 0.6   | 0.1   | 0.0   | 0.1  | 0.1  | 0.2   | 0.5   | 0.3   | 0.0  |
| Tstd2    | 10.4  | 11.0 | 8.9  | 10.2  | 10.7  | 10.7  | 9.5  | 9.6  | 9.3   | 9.2   | 9.9   | 9.2  |
| Tstd3    | 7.2   | 7.0  | 5.8  | 8.5   | 7.7   | 6.6   | 6.4  | 5.8  | 5.4   | 5.9   | 7.3   | 6.5  |
| Ttbk1    | 0.1   | 0.0  | 0.0  | 0.1   | 0.0   | 0.1   | 0.1  | 0.0  | 0.0   | 0.0   | 0.0   | 0.0  |

Online Table 1

|         |      |      |      |      |      |      |      |      |      |      |      |      |
|---------|------|------|------|------|------|------|------|------|------|------|------|------|
| Ttbk2   | 3.4  | 4.5  | 4.2  | 3.0  | 3.3  | 3.6  | 3.4  | 3.6  | 3.8  | 3.1  | 4.2  | 3.8  |
| Ttc1    | 28.8 | 20.4 | 19.4 | 31.5 | 20.1 | 29.6 | 17.4 | 15.4 | 15.4 | 20.0 | 21.4 | 22.6 |
| Ttc12   | 4.5  | 2.6  | 2.7  | 4.3  | 3.0  | 5.0  | 3.0  | 2.5  | 2.4  | 2.8  | 3.2  | 3.1  |
| Ttc13   | 28.0 | 19.4 | 18.4 | 25.8 | 20.5 | 28.3 | 21.2 | 18.6 | 16.7 | 19.8 | 23.3 | 21.2 |
| Ttc14   | 5.5  | 5.5  | 6.3  | 4.9  | 5.0  | 5.1  | 4.8  | 5.1  | 5.5  | 5.4  | 6.1  | 6.0  |
| Ttc16   | 0.2  | 0.3  | 0.2  | 0.2  | 0.1  | 0.3  | 0.2  | 0.1  | 0.2  | 0.3  | 0.4  | 0.2  |
| Ttc17   | 7.0  | 7.6  | 8.0  | 8.6  | 7.6  | 8.2  | 8.6  | 8.9  | 7.1  | 7.6  | 7.8  | 8.2  |
| Ttc18   | 0.1  | 0.1  | 0.1  | 0.1  | 0.1  | 0.1  | 0.1  | 0.1  | 0.1  | 0.0  | 0.1  | 0.1  |
| Ttc19   | 6.2  | 7.8  | 7.8  | 6.7  | 6.5  | 5.5  | 7.0  | 6.5  | 7.9  | 6.9  | 7.5  | 8.2  |
| Ttc21a  | 0.0  | 0.0  | 0.0  | 0.0  | 0.0  | 0.1  | 0.0  | 0.0  | 0.0  | 0.0  | 0.0  | 0.0  |
| Ttc21b  | 7.6  | 8.5  | 9.4  | 5.8  | 6.7  | 7.9  | 7.7  | 8.6  | 7.6  | 7.8  | 8.2  | 8.1  |
| Ttc22   | 0.0  | 0.0  | 0.0  | 0.0  | 0.0  | 0.0  | 0.0  | 0.0  | 0.0  | 0.1  | 0.0  | 0.0  |
| Ttc23   | 8.5  | 8.5  | 8.1  | 7.6  | 6.2  | 9.0  | 6.2  | 7.8  | 7.1  | 7.1  | 6.3  | 7.4  |
| Ttc23l  | 0.1  | 0.0  | 0.0  | 0.0  | 0.0  | 0.0  | 0.0  | 0.0  | 0.0  | 0.0  | 0.1  | 0.0  |
| Ttc25   | 0.2  | 0.2  | 0.3  | 0.3  | 0.3  | 0.4  | 0.2  | 0.2  | 0.1  | 0.1  | 0.2  | 0.3  |
| Ttc26   | 2.1  | 1.8  | 1.8  | 1.7  | 1.3  | 2.2  | 1.5  | 1.6  | 1.4  | 1.6  | 1.7  | 1.4  |
| Ttc27   | 5.1  | 4.8  | 3.4  | 5.4  | 5.0  | 5.8  | 5.0  | 4.4  | 4.2  | 5.9  | 4.7  | 4.2  |
| Ttc28   | 2.7  | 3.9  | 3.9  | 3.3  | 3.5  | 3.2  | 4.2  | 3.4  | 3.7  | 3.0  | 3.1  | 2.8  |
| Ttc3    | 17.6 | 19.7 | 19.5 | 15.6 | 15.8 | 19.0 | 15.2 | 18.3 | 17.0 | 16.9 | 19.0 | 16.8 |
| Ttc30a1 | 1.1  | 0.8  | 1.2  | 1.1  | 0.8  | 0.9  | 1.0  | 0.9  | 1.0  | 1.0  | 0.8  | 1.0  |
| Ttc30a2 | 0.2  | 0.3  | 0.3  | 0.3  | 0.2  | 0.3  | 0.3  | 0.3  | 0.2  | 0.2  | 0.3  | 0.3  |
| Ttc30b  | 4.5  | 4.7  | 5.4  | 4.4  | 3.6  | 5.0  | 3.7  | 4.8  | 4.2  | 5.1  | 4.6  | 5.3  |
| Ttc32   | 1.5  | 1.2  | 1.1  | 2.2  | 2.3  | 1.1  | 1.6  | 1.0  | 1.8  | 1.0  | 1.8  | 1.9  |
| Ttc33   | 19.1 | 16.5 | 18.5 | 22.2 | 17.2 | 22.4 | 15.3 | 15.6 | 15.5 | 18.8 | 16.8 | 20.3 |
| Ttc34   | 0.0  | 0.0  | 0.0  | 0.1  | 0.0  | 0.1  | 0.0  | 0.0  | 0.0  | 0.0  | 0.0  | 0.0  |
| Ttc36   | 0.0  | 0.1  | 0.1  | 0.0  | 0.0  | 0.0  | 0.1  | 0.0  | 0.0  | 0.1  | 0.1  | 0.0  |
| Ttc37   | 13.8 | 12.6 | 9.6  | 13.5 | 11.5 | 12.1 | 9.7  | 10.5 | 9.6  | 10.7 | 12.7 | 10.9 |
| Ttc38   | 3.8  | 4.5  | 4.6  | 3.3  | 3.4  | 4.5  | 3.5  | 4.3  | 3.6  | 3.4  | 3.4  | 3.9  |
| Ttc39a  | 0.2  | 0.2  | 0.3  | 0.1  | 0.1  | 0.2  | 0.2  | 0.2  | 0.1  | 0.1  | 0.1  | 0.2  |
| Ttc39b  | 11.3 | 13.7 | 11.9 | 16.7 | 14.0 | 15.6 | 17.6 | 12.2 | 13.2 | 12.7 | 15.0 | 13.2 |
| Ttc39c  | 4.1  | 4.1  | 3.7  | 3.8  | 3.4  | 5.4  | 3.2  | 4.2  | 3.8  | 4.2  | 3.7  | 4.4  |
| Ttc39d  | 0.1  | 0.1  | 0.0  | 0.0  | 0.0  | 0.1  | 0.0  | 0.1  | 0.0  | 0.0  | 0.1  | 0.1  |
| Ttc4    | 9.6  | 9.6  | 8.6  | 9.6  | 8.4  | 9.6  | 8.2  | 8.7  | 8.6  | 10.1 | 9.0  | 9.3  |
| Ttc5    | 14.6 | 12.9 | 11.8 | 14.3 | 12.8 | 16.0 | 11.7 | 12.9 | 12.0 | 13.1 | 10.7 | 12.0 |
| Ttc7    | 7.9  | 9.2  | 9.1  | 6.5  | 8.8  | 7.1  | 8.9  | 7.2  | 8.3  | 6.4  | 6.6  | 7.7  |
| Ttc7b   | 6.1  | 5.1  | 5.1  | 7.0  | 5.9  | 6.0  | 5.8  | 4.3  | 5.9  | 5.8  | 5.1  | 6.1  |
| Ttc8    | 8.4  | 8.1  | 9.3  | 8.8  | 6.8  | 8.9  | 9.1  | 7.8  | 8.5  | 8.1  | 8.9  | 8.7  |
| Ttc9    | 11.7 | 9.5  | 8.0  | 14.2 | 8.2  | 17.7 | 11.3 | 8.4  | 9.2  | 11.7 | 12.2 | 13.1 |
| Ttc9c   | 8.7  | 8.7  | 9.1  | 8.2  | 8.8  | 8.4  | 8.4  | 8.6  | 8.1  | 8.5  | 10.5 | 8.2  |
| Ttf1    | 6.3  | 6.6  | 7.2  | 6.6  | 5.6  | 6.2  | 5.1  | 5.9  | 5.0  | 6.3  | 6.4  | 7.0  |
| Ttf2    | 7.0  | 7.6  | 7.5  | 7.7  | 7.5  | 7.5  | 7.8  | 6.8  | 7.2  | 7.2  | 7.2  | 6.6  |
| Tti1    | 4.8  | 5.0  | 5.8  | 4.7  | 4.8  | 4.6  | 4.6  | 5.2  | 4.7  | 5.4  | 4.9  | 4.6  |
| Tti2    | 5.0  | 4.3  | 4.2  | 4.6  | 4.0  | 4.7  | 4.2  | 5.0  | 4.3  | 4.3  | 4.8  | 4.4  |
| Ttk     | 0.8  | 1.7  | 2.9  | 0.3  | 2.4  | 0.4  | 2.9  | 1.4  | 2.1  | 1.2  | 2.1  | 1.4  |
| Ttl     | 5.9  | 4.5  | 4.0  | 6.3  | 4.6  | 6.0  | 6.7  | 4.5  | 5.9  | 4.9  | 5.9  | 5.6  |
| Ttl1    | 7.8  | 7.5  | 7.8  | 7.4  | 7.3  | 8.4  | 6.5  | 7.2  | 5.8  | 7.6  | 7.9  | 6.1  |
| Ttl11   | 0.4  | 0.2  | 0.2  | 0.5  | 0.5  | 0.3  | 0.4  | 0.2  | 0.4  | 0.5  | 0.4  | 0.4  |
| Ttl12   | 11.9 | 10.7 | 8.6  | 12.6 | 9.9  | 12.9 | 10.8 | 9.7  | 9.0  | 10.4 | 9.7  | 8.6  |
| Ttl13   | 0.2  | 0.1  | 0.1  | 0.2  | 0.1  | 0.4  | 0.1  | 0.2  | 0.2  | 0.2  | 0.2  | 0.1  |
| Ttl2    | 0.0  | 0.0  | 0.0  | 0.0  | 0.0  | 0.0  | 0.0  | 0.0  | 0.0  | 0.0  | 0.0  | 0.0  |
| Ttl3    | 0.6  | 0.8  | 0.6  | 0.9  | 1.0  | 0.9  | 0.8  | 0.5  | 1.1  | 1.4  | 1.0  | 0.6  |
| Ttl4    | 2.3  | 2.5  | 2.5  | 2.3  | 2.5  | 1.5  | 3.0  | 2.8  | 2.7  | 2.5  | 2.4  | 1.8  |
| Ttl5    | 2.8  | 3.1  | 3.6  | 3.4  | 3.0  | 3.1  | 3.2  | 4.2  | 2.6  | 2.6  | 3.9  | 3.1  |
| Ttl7    | 6.6  | 5.9  | 5.0  | 8.9  | 4.4  | 8.5  | 5.0  | 4.1  | 4.2  | 6.0  | 5.4  | 5.5  |
| Ttl9    | 0.2  | 0.2  | 0.3  | 0.1  | 0.4  | 0.1  | 0.2  | 0.1  | 0.1  | 0.3  | 0.2  | 0.1  |
| Ttn     | 0.0  | 0.0  | 0.0  | 0.0  | 0.0  | 0.0  | 0.0  | 0.0  | 0.0  | 0.0  | 0.0  | 0.0  |
| Ttpa    | 0.1  | 0.1  | 0.1  | 0.1  | 0.0  | 0.1  | 0.0  | 0.0  | 0.1  | 0.1  | 0.2  | 0.0  |

Online Table 1

|            |       |       |       |       |       |       |       |       |       |       |       |       |
|------------|-------|-------|-------|-------|-------|-------|-------|-------|-------|-------|-------|-------|
| Ttpal      | 13.7  | 14.1  | 12.4  | 11.6  | 12.7  | 11.7  | 11.1  | 12.3  | 12.2  | 12.5  | 11.5  | 12.2  |
| Ttyh1      | 0.2   | 0.1   | 0.1   | 0.1   | 0.1   | 0.1   | 0.1   | 0.1   | 0.1   | 0.1   | 0.1   | 0.1   |
| Ttyh2      | 12.0  | 8.9   | 4.9   | 15.6  | 12.2  | 12.3  | 11.8  | 6.2   | 8.5   | 9.5   | 9.2   | 8.0   |
| Ttyh3      | 1.5   | 2.0   | 1.9   | 1.5   | 1.7   | 1.7   | 1.5   | 2.4   | 2.2   | 1.7   | 1.6   | 1.2   |
| Tub        | 0.0   | 0.0   | 0.0   | 0.1   | 0.0   | 0.0   | 0.1   | 0.0   | 0.0   | 0.0   | 0.0   | 0.0   |
| Tuba1a     | 392.7 | 397.0 | 343.7 | 506.9 | 326.2 | 381.8 | 495.1 | 483.9 | 454.7 | 240.4 | 426.3 | 252.2 |
| Tuba1b     | 138.7 | 132.9 | 137.6 | 169.3 | 163.7 | 127.5 | 216.7 | 158.0 | 187.1 | 136.2 | 164.2 | 121.9 |
| Tuba1c     | 244.4 | 225.9 | 193.6 | 290.7 | 260.7 | 231.3 | 348.5 | 257.4 | 295.6 | 184.3 | 236.4 | 152.5 |
| Tuba3b     | 0.0   | 0.0   | 0.0   | 0.0   | 0.0   | 0.0   | 0.0   | 0.0   | 0.0   | 0.0   | 0.0   | 0.0   |
| Tuba4a     | 17.9  | 12.9  | 9.7   | 29.6  | 19.4  | 19.6  | 18.0  | 9.4   | 9.2   | 18.0  | 15.4  | 11.5  |
| Tuba8      | 0.0   | 0.0   | 0.0   | 0.0   | 0.1   | 0.0   | 0.0   | 0.0   | 0.0   | 0.0   | 0.0   | 0.0   |
| Tubb2a     | 128.7 | 106.2 | 81.4  | 158.6 | 137.1 | 123.9 | 134.4 | 117.3 | 134.3 | 128.9 | 139.6 | 110.3 |
| Tubb2a-ps2 | 0.5   | 0.0   | 0.0   | 0.3   | 0.1   | 0.1   | 0.4   | 0.2   | 0.2   | 0.3   | 0.4   | 0.2   |
| Tubb2b     | 67.6  | 46.0  | 34.9  | 75.3  | 59.7  | 58.6  | 59.9  | 55.7  | 61.1  | 55.5  | 65.2  | 44.2  |
| Tubb3      | 112.4 | 118.5 | 84.5  | 174.0 | 202.3 | 92.9  | 269.1 | 224.3 | 210.3 | 148.0 | 216.0 | 133.7 |
| Tubb4a     | 8.4   | 14.2  | 12.8  | 10.4  | 12.2  | 7.8   | 15.1  | 17.7  | 7.3   | 7.1   | 9.8   | 7.4   |
| Tubb4b     | 120.7 | 103.0 | 117.1 | 125.5 | 150.6 | 94.4  | 152.4 | 95.5  | 126.1 | 163.7 | 145.6 | 109.3 |
| Tubb5      | 163.5 | 139.9 | 165.5 | 158.8 | 196.4 | 137.6 | 234.2 | 198.7 | 202.4 | 206.9 | 206.2 | 162.9 |
| Tubb6      | 36.9  | 38.1  | 45.9  | 33.0  | 63.2  | 20.1  | 86.8  | 51.9  | 67.9  | 57.2  | 70.3  | 48.9  |
| Tubd1      | 3.7   | 4.6   | 5.6   | 3.2   | 3.6   | 2.9   | 4.5   | 4.3   | 4.2   | 3.9   | 4.1   | 4.2   |
| Tube1      | 0.3   | 0.6   | 0.5   | 0.3   | 0.4   | 0.5   | 0.4   | 0.2   | 0.3   | 0.2   | 0.2   | 0.3   |
| Tubg1      | 9.8   | 11.6  | 10.7  | 8.8   | 10.8  | 10.4  | 14.1  | 11.0  | 9.9   | 9.6   | 10.8  | 8.4   |
| Tubg2      | 3.0   | 3.2   | 3.0   | 3.9   | 2.4   | 3.7   | 3.0   | 2.1   | 2.3   | 2.1   | 1.8   | 2.2   |
| Tubgcp2    | 12.8  | 12.7  | 13.2  | 13.2  | 12.6  | 11.7  | 13.2  | 12.2  | 10.9  | 10.1  | 12.1  | 11.1  |
| Tubgcp3    | 7.4   | 8.2   | 9.0   | 8.6   | 8.0   | 8.6   | 9.3   | 8.9   | 8.9   | 6.7   | 8.6   | 7.7   |
| Tubgcp4    | 10.0  | 9.9   | 8.8   | 11.2  | 10.8  | 11.7  | 9.2   | 8.4   | 8.9   | 8.8   | 8.8   | 7.9   |
| Tubgcp5    | 6.9   | 7.5   | 6.7   | 6.6   | 6.6   | 6.5   | 6.1   | 5.5   | 5.9   | 6.9   | 6.2   | 6.9   |
| Tubgcp6    | 3.4   | 3.7   | 4.2   | 3.9   | 4.0   | 4.1   | 4.2   | 3.9   | 3.9   | 3.3   | 3.7   | 3.6   |
| Tufm       | 26.6  | 27.4  | 25.3  | 26.9  | 28.8  | 27.4  | 28.9  | 29.1  | 25.6  | 29.1  | 30.6  | 26.6  |
| Tuft1      | 9.9   | 6.7   | 4.0   | 5.5   | 5.3   | 5.1   | 5.0   | 3.5   | 4.4   | 9.7   | 8.8   | 5.7   |
| Tug1       | 15.2  | 16.5  | 19.0  | 17.4  | 17.7  | 17.0  | 16.7  | 20.8  | 18.0  | 20.0  | 22.3  | 20.3  |
| Tulp1      | 0.0   | 0.1   | 0.0   | 0.0   | 0.0   | 0.0   | 0.0   | 0.1   | 0.0   | 0.1   | 0.2   | 0.1   |
| Tulp2      | 0.3   | 0.4   | 0.1   | 0.1   | 0.2   | 0.3   | 0.2   | 0.4   | 0.2   | 0.1   | 0.2   | 0.0   |
| Tulp3      | 11.0  | 12.3  | 13.3  | 8.7   | 11.0  | 10.7  | 11.9  | 12.9  | 12.8  | 11.0  | 12.3  | 12.5  |
| Tulp4      | 41.7  | 42.0  | 37.5  | 41.5  | 35.9  | 40.4  | 38.3  | 31.8  | 27.3  | 36.7  | 38.2  | 36.8  |
| Tusc1      | 0.7   | 1.5   | 1.2   | 0.6   | 0.8   | 1.8   | 1.2   | 1.3   | 1.2   | 0.9   | 1.0   | 1.7   |
| Tusc2      | 11.3  | 10.3  | 9.5   | 14.3  | 9.4   | 14.3  | 11.1  | 10.1  | 7.8   | 10.0  | 10.9  | 9.4   |
| Tusc3      | 48.8  | 40.7  | 30.3  | 44.9  | 39.6  | 50.2  | 43.9  | 36.9  | 42.6  | 42.7  | 42.6  | 40.2  |
| Tusc5      | 0.6   | 0.3   | 0.2   | 1.0   | 0.3   | 0.9   | 0.3   | 0.2   | 0.2   | 0.1   | 0.3   | 0.2   |
| Tut1       | 7.5   | 7.0   | 7.4   | 8.5   | 6.8   | 7.5   | 8.4   | 6.3   | 6.4   | 7.3   | 7.5   | 7.3   |
| Tvp23a     | 7.1   | 8.1   | 8.0   | 6.7   | 6.5   | 8.9   | 7.8   | 8.1   | 7.5   | 5.9   | 6.9   | 7.4   |
| Tvp23b     | 43.5  | 39.6  | 34.8  | 43.9  | 33.9  | 40.3  | 32.0  | 28.0  | 32.5  | 37.9  | 41.6  | 38.3  |
| Twf1       | 45.8  | 44.2  | 46.3  | 52.8  | 47.9  | 51.0  | 49.7  | 48.9  | 46.2  | 45.7  | 52.3  | 51.9  |
| Twf2       | 9.8   | 10.6  | 8.7   | 13.3  | 16.7  | 10.5  | 10.2  | 9.7   | 9.1   | 9.7   | 8.2   | 9.3   |
| Twist1     | 6.6   | 6.4   | 8.2   | 4.8   | 5.6   | 6.4   | 8.5   | 6.5   | 7.8   | 15.5  | 10.9  | 11.6  |
| Twist2     | 2.5   | 1.9   | 2.9   | 1.1   | 1.3   | 0.9   | 2.2   | 2.1   | 2.1   | 2.5   | 2.9   | 2.2   |
| Twistnb    | 6.9   | 7.7   | 7.2   | 7.7   | 7.5   | 6.8   | 6.9   | 7.8   | 7.4   | 8.1   | 9.2   | 8.4   |
| Twsg1      | 32.2  | 31.6  | 35.8  | 32.9  | 31.9  | 38.0  | 32.1  | 27.8  | 32.1  | 35.3  | 33.5  | 38.1  |
| Txk        | 0.0   | 0.1   | 0.0   | 0.0   | 0.0   | 0.1   | 0.1   | 0.1   | 0.0   | 0.2   | 0.1   | 0.0   |
| Txlna      | 20.6  | 21.8  | 21.9  | 21.3  | 21.7  | 19.1  | 22.8  | 22.6  | 20.7  | 21.7  | 23.7  | 21.3  |
| Txlnb      | 0.9   | 0.5   | 0.5   | 1.1   | 0.6   | 1.9   | 0.2   | 0.3   | 0.2   | 0.4   | 0.5   | 0.2   |
| Txlng      | 2.0   | 2.5   | 2.9   | 2.9   | 2.5   | 2.3   | 2.5   | 2.6   | 2.5   | 3.2   | 3.8   | 3.1   |
| Txn1       | 131.4 | 119.3 | 98.2  | 155.2 | 136.6 | 153.5 | 101.2 | 116.8 | 116.1 | 125.9 | 120.3 | 99.4  |
| Txn2       | 48.9  | 43.2  | 38.6  | 62.3  | 49.1  | 55.5  | 50.6  | 47.2  | 40.4  | 45.4  | 52.6  | 42.0  |
| Txndc11    | 8.4   | 9.2   | 7.3   | 9.1   | 9.1   | 8.7   | 9.4   | 8.8   | 9.3   | 8.1   | 8.5   | 7.7   |
| Txndc12    | 36.6  | 32.4  | 36.4  | 39.9  | 36.6  | 38.9  | 34.6  | 35.1  | 34.6  | 38.6  | 38.4  | 35.0  |
| Txndc15    | 39.9  | 37.9  | 41.8  | 41.9  | 38.3  | 46.1  | 38.4  | 35.8  | 38.3  | 43.6  | 35.8  | 43.7  |

Online Table 1

|         |        |        |        |        |       |        |        |        |       |        |        |        |
|---------|--------|--------|--------|--------|-------|--------|--------|--------|-------|--------|--------|--------|
| Txndc16 | 22.5   | 18.3   | 18.3   | 21.1   | 17.9  | 26.5   | 16.1   | 15.8   | 14.9  | 16.2   | 17.7   | 21.4   |
| Txndc17 | 88.1   | 66.7   | 62.3   | 89.3   | 62.5  | 80.6   | 64.9   | 63.1   | 60.9  | 64.0   | 78.3   | 67.5   |
| Txndc2  | 0.2    | 0.2    | 0.2    | 0.2    | 0.2   | 0.2    | 0.2    | 0.2    | 0.1   | 0.3    | 0.1    | 0.1    |
| Txndc5  | 182.6  | 160.1  | 158.1  | 182.2  | 155.5 | 187.1  | 190.7  | 181.1  | 173.5 | 175.1  | 184.2  | 187.8  |
| Txndc9  | 17.2   | 15.7   | 13.8   | 18.6   | 15.8  | 17.4   | 15.2   | 13.5   | 13.7  | 17.2   | 17.2   | 17.1   |
| Txnip   | 19.4   | 21.4   | 24.5   | 48.7   | 59.2  | 25.9   | 53.8   | 51.3   | 54.4  | 57.2   | 47.0   | 60.6   |
| Txnl1   | 39.5   | 40.7   | 36.6   | 42.7   | 40.2  | 45.3   | 41.0   | 36.9   | 41.6  | 43.3   | 43.7   | 44.7   |
| Txnl4a  | 61.8   | 45.5   | 39.0   | 60.0   | 53.4  | 60.2   | 51.0   | 45.5   | 48.3  | 51.6   | 52.4   | 43.6   |
| Txnl4b  | 4.3    | 4.5    | 4.6    | 6.3    | 4.4   | 4.7    | 3.9    | 4.7    | 3.9   | 3.6    | 4.9    | 4.2    |
| Txnrd1  | 64.6   | 36.3   | 25.4   | 97.7   | 65.4  | 73.1   | 38.0   | 26.7   | 25.5  | 46.2   | 36.9   | 31.5   |
| Txnrd2  | 2.6    | 2.9    | 3.0    | 4.4    | 4.0   | 3.5    | 3.4    | 2.3    | 3.1   | 3.2    | 2.4    | 3.2    |
| Txnrd3  | 2.6    | 3.0    | 2.1    | 2.8    | 2.1   | 3.4    | 3.1    | 4.1    | 3.2   | 2.5    | 3.1    | 3.5    |
| Tyk2    | 3.6    | 4.7    | 4.6    | 3.8    | 5.0   | 4.5    | 3.4    | 4.3    | 4.4   | 4.0    | 3.5    | 4.1    |
| Tymp    | 0.4    | 0.3    | 0.1    | 0.3    | 0.3   | 0.2    | 0.4    | 0.1    | 0.4   | 0.5    | 0.1    | 0.3    |
| Tyms    | 5.8    | 7.1    | 8.2    | 4.5    | 7.5   | 3.8    | 7.6    | 7.3    | 7.7   | 5.5    | 6.4    | 5.8    |
| Tyms-ps | 0.2    | 0.2    | 0.5    | 0.1    | 0.3   | 0.1    | 0.4    | 0.2    | 0.2   | 0.2    | 0.2    | 0.1    |
| Tyr     | 0.0    | 0.0    | 0.0    | 0.0    | 0.0   | 0.0    | 0.0    | 0.0    | 0.0   | 0.0    | 0.0    | 0.0    |
| Tyro3   | 4.6    | 5.6    | 6.0    | 3.7    | 4.1   | 4.6    | 5.2    | 6.1    | 5.6   | 3.8    | 3.9    | 3.7    |
| Tyrbp   | 15.1   | 0.4    | 0.6    | 133.1  | 177.6 | 0.1    | 17.5   | 3.2    | 2.5   | 9.8    | 2.4    | 6.7    |
| Tysnd1  | 21.6   | 20.8   | 16.8   | 19.6   | 20.5  | 19.8   | 21.3   | 17.8   | 19.7  | 20.9   | 19.0   | 19.2   |
| Tyw1    | 12.5   | 10.7   | 9.4    | 11.9   | 10.4  | 12.6   | 10.5   | 10.0   | 9.4   | 11.1   | 10.2   | 9.5    |
| Tyw3    | 0.4    | 0.4    | 0.4    | 0.5    | 0.5   | 0.5    | 0.6    | 0.5    | 0.4   | 0.5    | 0.5    | 0.6    |
| Tyw5    | 7.1    | 8.6    | 8.2    | 6.7    | 6.8   | 9.2    | 8.0    | 5.4    | 7.6   | 7.7    | 8.3    | 7.7    |
| U05342  | 1.0    | 0.6    | 0.7    | 2.1    | 0.2   | 0.2    | 0.3    | 0.9    | 0.2   | 1.2    | 0.8    | 0.3    |
| U2af1   | 29.3   | 29.4   | 33.4   | 36.5   | 33.8  | 31.6   | 37.5   | 39.3   | 33.7  | 39.1   | 39.9   | 33.9   |
| U2af114 | 16.4   | 12.1   | 13.4   | 21.9   | 12.1  | 19.3   | 17.3   | 14.7   | 13.9  | 14.1   | 13.6   | 12.9   |
| U2af2   | 42.6   | 39.3   | 37.2   | 44.5   | 41.5  | 39.4   | 41.4   | 39.8   | 38.5  | 40.6   | 40.1   | 37.3   |
| U2surp  | 9.8    | 9.9    | 11.3   | 10.8   | 9.3   | 10.1   | 10.2   | 9.7    | 8.3   | 9.9    | 11.7   | 11.5   |
| Uaca    | 10.1   | 11.1   | 12.6   | 10.4   | 9.6   | 8.1    | 10.5   | 12.5   | 9.3   | 13.4   | 11.1   | 13.5   |
| Uap1    | 43.0   | 43.3   | 38.4   | 39.6   | 36.3  | 38.6   | 37.9   | 35.1   | 33.3  | 29.6   | 38.3   | 34.4   |
| Uap111  | 44.0   | 24.2   | 19.4   | 46.5   | 34.8  | 39.4   | 18.0   | 22.3   | 16.3  | 28.4   | 18.1   | 25.4   |
| Uba1    | 83.6   | 76.5   | 69.1   | 86.1   | 85.6  | 80.3   | 80.1   | 76.9   | 69.8  | 74.3   | 78.0   | 75.6   |
| Uba1y   | 0.0    | 0.0    | 0.0    | 0.0    | 0.0   | 0.0    | 0.0    | 0.0    | 0.0   | 0.0    | 0.0    | 0.0    |
| Uba2    | 34.0   | 32.9   | 36.3   | 31.9   | 31.9  | 30.2   | 36.9   | 36.8   | 36.1  | 33.4   | 40.0   | 36.1   |
| Uba3    | 41.0   | 39.4   | 36.1   | 43.0   | 33.6  | 43.0   | 36.8   | 37.9   | 35.0  | 37.4   | 45.5   | 39.2   |
| Uba5    | 34.3   | 30.1   | 29.6   | 33.9   | 30.3  | 31.2   | 30.1   | 28.9   | 28.9  | 31.9   | 35.1   | 35.2   |
| Uba52   | 1247.5 | 1027.6 | 1038.9 | 1173.2 | 967.4 | 1134.3 | 1054.0 | 1272.4 | 912.0 | 1077.8 | 1091.7 | 1048.6 |
| Uba6    | 7.6    | 8.4    | 8.0    | 7.8    | 8.2   | 8.7    | 7.0    | 7.2    | 8.3   | 8.6    | 9.7    | 9.1    |
| Uba7    | 5.7    | 5.3    | 6.9    | 6.6    | 7.2   | 6.4    | 4.9    | 4.4    | 5.7   | 4.1    | 3.4    | 4.9    |
| Ubac1   | 9.7    | 8.5    | 7.0    | 7.0    | 7.2   | 8.2    | 8.1    | 7.7    | 7.4   | 8.0    | 8.0    | 8.4    |
| Ubac2   | 10.0   | 9.0    | 8.0    | 10.3   | 9.6   | 9.3    | 7.6    | 9.8    | 9.3   | 9.8    | 9.2    | 7.7    |
| Ubald1  | 5.5    | 6.1    | 5.2    | 7.0    | 7.5   | 5.8    | 7.2    | 5.9    | 6.9   | 6.5    | 6.4    | 6.2    |
| Ubald2  | 12.7   | 7.1    | 5.7    | 4.7    | 10.1  | 7.8    | 6.3    | 7.0    | 10.2  | 8.9    | 10.4   | 8.7    |
| Ubap1   | 27.2   | 25.1   | 21.4   | 32.0   | 23.0  | 29.9   | 20.9   | 18.9   | 18.6  | 18.0   | 21.2   | 20.0   |
| Ubap2   | 8.5    | 9.5    | 10.0   | 9.7    | 8.8   | 8.3    | 10.8   | 8.5    | 7.9   | 6.5    | 8.8    | 6.7    |
| Ubap2l  | 22.6   | 24.4   | 27.7   | 26.3   | 23.8  | 22.5   | 28.6   | 27.1   | 20.3  | 21.7   | 25.2   | 23.5   |
| Ubash3b | 1.3    | 1.1    | 1.1    | 2.9    | 4.8   | 1.1    | 2.5    | 1.1    | 1.3   | 2.9    | 1.5    | 1.5    |
| Ubb     | 542.5  | 508.0  | 518.0  | 684.7  | 580.9 | 637.9  | 659.1  | 612.9  | 506.9 | 590.8  | 618.4  | 549.3  |
| Ubc     | 356.6  | 353.6  | 298.1  | 399.6  | 349.0 | 386.2  | 389.6  | 319.8  | 374.9 | 408.2  | 371.2  | 370.5  |
| Ube2a   | 15.9   | 15.8   | 14.1   | 15.0   | 16.4  | 13.6   | 14.6   | 13.7   | 15.7  | 17.7   | 16.9   | 16.8   |
| Ube2b   | 29.6   | 32.1   | 34.2   | 29.8   | 33.2  | 33.8   | 30.8   | 27.8   | 31.3  | 40.0   | 37.3   | 36.2   |
| Ube2c   | 5.3    | 10.4   | 16.1   | 1.9    | 14.0  | 1.5    | 23.2   | 6.4    | 16.9  | 7.3    | 14.9   | 7.1    |
| Ube2cbp | 0.1    | 0.2    | 0.1    | 0.2    | 0.2   | 0.3    | 0.0    | 0.1    | 0.2   | 0.2    | 0.2    | 0.1    |
| Ube2d1  | 7.4    | 7.8    | 7.9    | 9.6    | 8.8   | 9.1    | 10.1   | 7.7    | 7.4   | 8.3    | 7.6    | 8.4    |
| Ube2d2a | 32.3   | 32.8   | 31.4   | 33.2   | 33.5  | 34.9   | 31.2   | 30.0   | 35.7  | 33.7   | 34.9   | 34.5   |
| Ube2d2b | 0.1    | 0.1    | 0.0    | 0.1    | 0.0   | 0.1    | 0.0    | 0.1    | 0.0   | 0.0    | 0.1    | 0.1    |
| Ube2d3  | 56.8   | 64.1   | 77.9   | 84.7   | 75.2  | 73.3   | 82.6   | 78.7   | 72.4  | 70.8   | 90.4   | 86.6   |

Online Table 1



|         |       |      |      |       |      |       |      |      |      |      |      |      |
|---------|-------|------|------|-------|------|-------|------|------|------|------|------|------|
| Ube2e1  | 28.3  | 22.5 | 22.9 | 32.2  | 23.5 | 29.5  | 24.3 | 19.7 | 20.5 | 27.6 | 28.8 | 29.1 |
| Ube2e2  | 10.6  | 11.9 | 15.0 | 10.4  | 13.8 | 12.7  | 16.4 | 14.3 | 12.4 | 12.1 | 15.2 | 18.5 |
| Ube2e3  | 16.2  | 20.7 | 20.3 | 13.8  | 18.0 | 17.1  | 20.9 | 21.6 | 22.4 | 21.4 | 18.9 | 20.0 |
| Ube2f   | 31.5  | 29.4 | 25.5 | 36.0  | 35.8 | 29.6  | 32.4 | 26.2 | 27.0 | 26.8 | 29.2 | 27.7 |
| Ube2g1  | 7.1   | 8.9  | 8.5  | 7.4   | 8.7  | 8.2   | 8.6  | 9.1  | 8.9  | 9.5  | 9.9  | 9.6  |
| Ube2g2  | 29.4  | 23.1 | 21.4 | 32.9  | 27.7 | 26.9  | 31.6 | 26.5 | 26.9 | 26.3 | 30.8 | 25.7 |
| Ube2h   | 49.1  | 57.5 | 57.0 | 41.5  | 39.3 | 46.9  | 37.9 | 43.0 | 44.4 | 51.9 | 48.4 | 51.6 |
| Ube2i   | 78.6  | 66.6 | 59.3 | 77.1  | 68.6 | 75.4  | 68.1 | 60.2 | 64.3 | 75.5 | 71.2 | 67.5 |
| Ube2j1  | 29.0  | 29.6 | 31.7 | 35.0  | 31.0 | 32.2  | 32.2 | 32.7 | 31.6 | 32.5 | 36.1 | 35.3 |
| Ube2j2  | 3.0   | 2.1  | 2.6  | 2.1   | 3.0  | 2.4   | 2.9  | 3.0  | 3.4  | 2.7  | 2.5  | 2.3  |
| Ube2k   | 7.0   | 7.2  | 8.1  | 9.3   | 7.9  | 8.1   | 7.3  | 7.0  | 7.4  | 7.8  | 8.3  | 8.7  |
| Ube2l3  | 49.7  | 43.7 | 39.2 | 57.4  | 46.5 | 49.6  | 42.8 | 43.5 | 40.6 | 47.0 | 50.2 | 43.9 |
| Ube2l6  | 21.8  | 19.1 | 20.5 | 27.2  | 23.8 | 14.9  | 18.6 | 17.5 | 15.4 | 22.5 | 17.2 | 22.5 |
| Ube2m   | 59.2  | 51.8 | 45.5 | 60.1  | 53.4 | 60.1  | 57.6 | 55.7 | 53.2 | 49.6 | 56.6 | 49.7 |
| Ube2n   | 17.0  | 15.7 | 17.4 | 18.5  | 17.0 | 17.6  | 18.2 | 17.4 | 16.5 | 18.2 | 20.6 | 18.1 |
| Ube2o   | 7.7   | 8.5  | 7.9  | 7.8   | 8.1  | 8.0   | 10.2 | 7.0  | 8.7  | 7.8  | 7.8  | 6.6  |
| Ube2q1  | 18.1  | 18.2 | 16.4 | 19.6  | 18.9 | 14.9  | 17.8 | 17.4 | 18.1 | 20.5 | 17.5 | 18.1 |
| Ube2q2  | 12.1  | 10.3 | 12.9 | 13.1  | 11.9 | 14.3  | 11.4 | 11.7 | 11.0 | 14.2 | 13.9 | 14.4 |
| Ube2ql1 | 0.0   | 0.0  | 0.0  | 0.1   | 0.0  | 0.1   | 0.0  | 0.0  | 0.0  | 0.1  | 0.0  | 0.0  |
| Ube2r2  | 27.9  | 25.9 | 26.9 | 31.6  | 24.5 | 30.0  | 27.8 | 27.0 | 25.4 | 24.9 | 31.6 | 28.7 |
| Ube2s   | 74.6  | 60.5 | 64.8 | 63.9  | 69.0 | 56.4  | 85.6 | 58.8 | 77.9 | 68.8 | 78.9 | 66.0 |
| Ube2t   | 1.2   | 2.7  | 3.3  | 0.3   | 3.7  | 0.6   | 4.1  | 1.2  | 3.7  | 1.5  | 2.8  | 2.2  |
| Ube2u   | 0.0   | 0.1  | 0.0  | 0.0   | 0.1  | 0.1   | 0.0  | 0.0  | 0.0  | 0.0  | 0.0  | 0.0  |
| Ube2v1  | 50.4  | 44.5 | 40.2 | 59.1  | 45.0 | 52.7  | 53.5 | 49.2 | 44.0 | 50.5 | 55.2 | 46.4 |
| Ube2v2  | 5.6   | 7.3  | 7.4  | 7.5   | 6.9  | 7.1   | 6.6  | 6.9  | 6.3  | 7.3  | 7.9  | 7.8  |
| Ube2w   | 13.7  | 15.7 | 15.2 | 17.4  | 15.6 | 16.6  | 14.4 | 14.6 | 17.3 | 19.5 | 19.2 | 20.7 |
| Ube2z   | 21.8  | 22.2 | 20.9 | 22.3  | 22.7 | 22.5  | 27.3 | 24.2 | 27.4 | 24.1 | 24.0 | 24.1 |
| Ube3a   | 13.9  | 15.7 | 15.3 | 14.2  | 14.0 | 14.2  | 14.6 | 13.2 | 14.2 | 16.3 | 16.7 | 18.0 |
| Ube3b   | 13.9  | 16.1 | 14.6 | 12.2  | 14.6 | 13.2  | 15.9 | 14.6 | 16.2 | 13.1 | 13.7 | 12.0 |
| Ube3c   | 16.9  | 15.9 | 14.6 | 16.1  | 15.6 | 15.2  | 16.5 | 17.7 | 17.8 | 17.3 | 17.6 | 18.7 |
| Ube4a   | 9.5   | 9.6  | 9.0  | 10.9  | 10.1 | 9.4   | 8.9  | 9.9  | 9.1  | 9.3  | 9.9  | 9.0  |
| Ube4b   | 12.5  | 14.8 | 14.6 | 12.1  | 13.7 | 12.1  | 14.9 | 16.1 | 14.4 | 14.2 | 14.5 | 13.5 |
| Ubfd1   | 15.2  | 17.5 | 15.3 | 14.2  | 16.8 | 12.7  | 15.2 | 17.9 | 18.0 | 19.7 | 17.5 | 17.2 |
| Ubiad1  | 4.1   | 4.3  | 4.0  | 3.8   | 4.4  | 4.2   | 4.6  | 5.3  | 4.9  | 4.4  | 4.3  | 3.7  |
| Ubl3    | 19.9  | 16.6 | 15.1 | 28.9  | 22.6 | 26.1  | 16.7 | 15.2 | 15.1 | 17.1 | 16.3 | 17.2 |
| Ubl4    | 9.0   | 8.4  | 8.4  | 7.9   | 8.8  | 7.2   | 8.4  | 10.2 | 9.3  | 7.9  | 8.9  | 7.9  |
| Ubl5    | 36.5  | 31.1 | 32.7 | 36.7  | 29.7 | 34.5  | 29.7 | 32.1 | 30.4 | 31.2 | 32.5 | 30.6 |
| Ubl7    | 18.8  | 20.6 | 18.3 | 20.4  | 16.5 | 21.3  | 17.3 | 18.8 | 16.8 | 14.8 | 16.1 | 15.7 |
| Ublcp1  | 19.8  | 21.6 | 21.0 | 20.4  | 19.2 | 21.4  | 18.2 | 20.4 | 19.6 | 20.5 | 23.3 | 22.9 |
| Ubn1    | 8.9   | 10.1 | 10.2 | 8.3   | 9.0  | 8.6   | 9.1  | 9.2  | 9.3  | 9.6  | 9.2  | 10.2 |
| Ubn2    | 1.3   | 1.8  | 1.9  | 1.4   | 1.6  | 1.3   | 1.5  | 1.7  | 1.5  | 1.5  | 1.5  | 1.5  |
| Ubox5   | 1.4   | 1.7  | 1.6  | 2.0   | 1.7  | 1.6   | 1.4  | 1.4  | 1.5  | 1.8  | 1.4  | 1.3  |
| Ubp1    | 12.5  | 14.3 | 14.2 | 12.9  | 13.1 | 12.5  | 15.1 | 13.7 | 15.0 | 11.3 | 13.8 | 12.4 |
| Ubqln1  | 29.5  | 27.2 | 27.6 | 35.8  | 29.7 | 29.4  | 32.3 | 27.9 | 28.4 | 30.4 | 33.9 | 30.0 |
| Ubqln2  | 2.3   | 2.8  | 2.6  | 3.8   | 2.9  | 3.0   | 4.0  | 2.6  | 2.9  | 2.8  | 3.2  | 2.2  |
| Ubqln4  | 9.4   | 9.1  | 7.8  | 11.3  | 9.6  | 9.9   | 9.8  | 8.2  | 8.5  | 9.0  | 9.1  | 8.2  |
| Ubr1    | 8.7   | 11.8 | 12.3 | 8.4   | 10.6 | 7.9   | 12.5 | 13.9 | 14.3 | 10.9 | 11.4 | 13.1 |
| Ubr2    | 9.8   | 10.6 | 10.3 | 10.0  | 9.8  | 10.2  | 10.7 | 11.0 | 10.3 | 9.8  | 10.4 | 10.1 |
| Ubr3    | 9.8   | 9.2  | 10.4 | 9.6   | 9.6  | 9.2   | 10.0 | 9.6  | 9.2  | 9.9  | 10.3 | 10.6 |
| Ubr4    | 15.4  | 16.8 | 15.1 | 16.4  | 15.8 | 17.3  | 18.4 | 13.7 | 14.9 | 13.8 | 13.1 | 12.1 |
| Ubr5    | 43.2  | 57.1 | 51.6 | 41.3  | 40.4 | 43.3  | 48.9 | 42.6 | 49.6 | 47.6 | 49.7 | 56.1 |
| Ubr7    | 10.5  | 12.3 | 12.3 | 9.4   | 9.9  | 11.1  | 9.2  | 10.2 | 10.7 | 12.2 | 10.9 | 10.6 |
| Ubsd1   | 29.1  | 25.8 | 18.1 | 28.2  | 28.4 | 24.6  | 28.4 | 24.0 | 25.6 | 26.5 | 23.7 | 22.0 |
| Ubsd2   | 8.1   | 9.5  | 11.5 | 7.3   | 8.3  | 7.7   | 9.8  | 15.4 | 12.9 | 10.6 | 11.5 | 11.4 |
| Ubif    | 21.2  | 22.1 | 27.3 | 21.6  | 19.9 | 21.0  | 23.7 | 26.9 | 23.3 | 21.2 | 24.8 | 24.3 |
| Ubxn1   | 107.3 | 88.0 | 95.7 | 135.0 | 78.3 | 129.8 | 89.9 | 86.2 | 65.1 | 76.5 | 98.8 | 99.7 |
| Ubxn10  | 0.0   | 0.0  | 0.0  | 0.1   | 0.0  | 0.0   | 0.0  | 0.0  | 0.0  | 0.0  | 0.0  | 0.0  |

Online Table 1

|           |      |      |      |      |      |      |      |      |      |      |      |      |
|-----------|------|------|------|------|------|------|------|------|------|------|------|------|
| Ubxn11    | 1.0  | 0.6  | 0.5  | 0.9  | 0.5  | 2.0  | 0.6  | 0.5  | 0.4  | 0.7  | 0.7  | 0.5  |
| Ubxn2a    | 23.7 | 20.1 | 21.5 | 25.9 | 18.0 | 27.6 | 18.6 | 14.8 | 15.6 | 20.5 | 21.5 | 22.9 |
| Ubxn2b    | 2.7  | 2.2  | 2.3  | 3.3  | 2.3  | 3.0  | 2.0  | 2.3  | 2.3  | 2.9  | 2.7  | 3.0  |
| Ubxn4     | 42.6 | 37.9 | 37.6 | 51.7 | 36.5 | 44.7 | 41.6 | 35.0 | 35.4 | 42.7 | 48.5 | 49.2 |
| Ubxn6     | 27.6 | 26.6 | 24.3 | 28.0 | 24.4 | 27.0 | 25.6 | 27.1 | 27.9 | 25.9 | 24.8 | 28.1 |
| Ubxn7     | 5.5  | 6.6  | 7.2  | 5.0  | 5.1  | 5.4  | 5.4  | 5.8  | 5.6  | 7.3  | 6.6  | 6.4  |
| Ubxn8     | 5.6  | 4.1  | 5.1  | 7.5  | 5.3  | 5.2  | 7.6  | 6.1  | 5.8  | 6.5  | 7.8  | 7.8  |
| Uchl1     | 42.1 | 20.7 | 15.1 | 55.6 | 54.4 | 60.5 | 17.6 | 22.6 | 10.2 | 14.8 | 17.3 | 12.2 |
| Uchl3     | 12.3 | 10.7 | 11.3 | 12.0 | 12.1 | 13.4 | 10.1 | 10.4 | 9.4  | 9.6  | 11.4 | 12.3 |
| Uchl4     | 0.2  | 0.3  | 0.1  | 0.2  | 0.4  | 0.4  | 0.3  | 0.2  | 0.1  | 0.2  | 0.1  | 0.0  |
| Uchl5     | 6.7  | 7.5  | 6.0  | 9.5  | 8.5  | 9.3  | 6.8  | 6.2  | 5.9  | 7.3  | 6.9  | 7.3  |
| Uck1      | 13.9 | 12.5 | 11.1 | 13.2 | 12.1 | 12.6 | 13.1 | 13.1 | 14.6 | 15.5 | 14.6 | 13.6 |
| Uck2      | 34.4 | 34.4 | 41.4 | 29.5 | 34.0 | 31.8 | 41.8 | 49.7 | 37.0 | 49.5 | 47.6 | 43.8 |
| Uckl1     | 14.4 | 13.9 | 11.0 | 13.5 | 13.4 | 14.0 | 10.9 | 12.7 | 14.8 | 13.6 | 13.7 | 14.0 |
| Ucn2      | 0.1  | 0.0  | 0.0  | 0.0  | 0.1  | 0.0  | 0.0  | 0.1  | 0.0  | 0.0  | 0.0  | 0.1  |
| Ucp2      | 0.6  | 0.1  | 0.2  | 5.1  | 9.8  | 0.1  | 1.3  | 0.4  | 0.3  | 1.0  | 0.5  | 0.6  |
| Uevld     | 8.0  | 8.1  | 8.5  | 7.5  | 7.5  | 9.6  | 7.2  | 6.6  | 7.3  | 7.0  | 7.7  | 7.8  |
| Ufc1      | 76.5 | 63.8 | 55.5 | 75.8 | 60.8 | 66.2 | 56.3 | 57.2 | 61.4 | 74.6 | 61.5 | 74.8 |
| Ufd1l     | 21.7 | 18.1 | 16.4 | 21.7 | 19.6 | 19.2 | 20.3 | 18.2 | 19.7 | 18.2 | 19.7 | 19.9 |
| Ufl1      | 10.4 | 10.2 | 10.1 | 9.8  | 7.9  | 10.1 | 7.9  | 8.5  | 8.4  | 8.8  | 10.8 | 10.9 |
| Ufm1      | 24.6 | 18.9 | 16.6 | 30.7 | 19.4 | 26.3 | 21.4 | 16.3 | 18.1 | 21.9 | 24.9 | 24.8 |
| Ufsp1     | 3.3  | 2.8  | 2.6  | 2.7  | 2.9  | 3.5  | 2.6  | 1.9  | 2.0  | 3.3  | 1.5  | 2.5  |
| Ufsp2     | 35.5 | 30.9 | 35.9 | 38.5 | 33.3 | 32.5 | 33.1 | 34.5 | 29.9 | 31.6 | 36.6 | 39.3 |
| Ugcg      | 41.5 | 62.2 | 82.6 | 49.9 | 65.7 | 49.4 | 82.4 | 80.4 | 73.1 | 37.1 | 52.7 | 63.3 |
| Ugdh      | 45.9 | 52.3 | 52.9 | 34.1 | 44.9 | 38.5 | 46.5 | 44.5 | 40.8 | 46.8 | 46.4 | 49.4 |
| Uggt1     | 29.7 | 27.2 | 28.0 | 24.5 | 29.0 | 26.8 | 26.9 | 30.8 | 25.6 | 25.7 | 27.8 | 26.3 |
| Uggt2     | 2.5  | 2.7  | 3.1  | 2.0  | 2.3  | 2.5  | 2.5  | 2.7  | 2.7  | 3.4  | 3.1  | 2.9  |
| Ugp2      | 58.7 | 71.4 | 76.4 | 51.2 | 62.3 | 46.1 | 44.5 | 58.3 | 54.4 | 49.7 | 50.9 | 59.4 |
| Ugt1a1    | 0.0  | 0.0  | 0.0  | 0.0  | 0.0  | 0.0  | 0.0  | 0.0  | 0.1  | 0.2  | 0.0  | 0.0  |
| Ugt1a10   | 0.1  | 0.1  | 0.0  | 0.0  | 0.1  | 0.1  | 0.0  | 0.1  | 0.0  | 0.2  | 0.1  | 0.0  |
| Ugt1a2    | 0.0  | 0.1  | 0.0  | 0.0  | 0.0  | 0.0  | 0.0  | 0.0  | 0.0  | 0.1  | 0.0  | 0.0  |
| Ugt1a5    | 0.0  | 0.0  | 0.0  | 0.0  | 0.0  | 0.0  | 0.0  | 0.1  | 0.0  | 0.2  | 0.0  | 0.0  |
| Ugt1a6a   | 9.8  | 11.8 | 16.5 | 9.1  | 13.0 | 10.8 | 7.3  | 20.4 | 9.7  | 18.0 | 16.9 | 10.9 |
| Ugt1a6b   | 4.7  | 4.9  | 6.1  | 2.3  | 5.4  | 3.4  | 3.7  | 9.4  | 4.0  | 9.8  | 7.8  | 5.2  |
| Ugt1a7c   | 15.5 | 11.6 | 13.5 | 10.1 | 16.2 | 9.4  | 8.7  | 23.2 | 12.4 | 44.0 | 23.2 | 17.8 |
| Ugt1a9    | 0.0  | 0.1  | 0.0  | 0.0  | 0.1  | 0.1  | 0.0  | 0.1  | 0.0  | 0.1  | 0.0  | 0.0  |
| Ugt2b35   | 0.0  | 0.0  | 0.0  | 0.1  | 0.0  | 0.0  | 0.0  | 0.0  | 0.0  | 0.0  | 0.0  | 0.0  |
| Uhmk1     | 17.9 | 18.9 | 13.1 | 19.8 | 20.5 | 15.5 | 14.3 | 13.3 | 14.6 | 17.7 | 15.9 | 16.8 |
| Uhrf1     | 3.4  | 6.9  | 9.7  | 1.7  | 9.9  | 1.8  | 11.7 | 6.5  | 7.5  | 4.2  | 7.1  | 4.3  |
| Uhrf1bp1  | 3.6  | 4.1  | 4.1  | 3.1  | 3.9  | 2.6  | 4.3  | 5.3  | 4.4  | 3.5  | 3.9  | 3.6  |
| Uhrf1bp1l | 11.2 | 10.9 | 11.0 | 11.3 | 12.3 | 10.1 | 12.3 | 11.4 | 11.1 | 14.0 | 13.3 | 14.3 |
| Uhrf2     | 16.6 | 20.3 | 23.9 | 16.6 | 19.2 | 18.5 | 17.9 | 20.0 | 21.9 | 21.5 | 23.2 | 22.3 |
| Uimc1     | 14.2 | 14.2 | 16.7 | 13.0 | 12.3 | 13.8 | 13.9 | 14.6 | 12.3 | 12.2 | 15.3 | 15.4 |
| Ulbp1     | 7.7  | 9.3  | 7.8  | 2.7  | 8.8  | 4.9  | 8.0  | 4.9  | 5.9  | 5.0  | 6.9  | 4.1  |
| Ulk1      | 2.7  | 3.9  | 3.9  | 2.5  | 3.0  | 3.2  | 3.1  | 3.3  | 3.4  | 3.5  | 3.2  | 2.7  |
| Ulk2      | 21.8 | 22.0 | 18.3 | 23.0 | 17.7 | 23.2 | 19.2 | 17.2 | 20.2 | 18.1 | 20.2 | 19.0 |
| Ulk3      | 1.4  | 1.7  | 1.3  | 1.8  | 1.5  | 1.2  | 1.5  | 1.2  | 1.4  | 1.1  | 1.2  | 0.9  |
| Ulk4      | 0.6  | 0.9  | 0.7  | 0.7  | 0.5  | 0.7  | 0.7  | 0.8  | 0.6  | 0.5  | 0.5  | 0.7  |
| Umps      | 9.2  | 9.1  | 9.6  | 7.5  | 8.9  | 7.6  | 12.6 | 9.6  | 11.6 | 9.7  | 10.3 | 11.2 |
| Unc119    | 13.8 | 12.2 | 8.8  | 15.8 | 13.5 | 13.4 | 12.7 | 11.8 | 11.0 | 15.2 | 12.2 | 11.6 |
| Unc119b   | 9.9  | 9.9  | 9.8  | 8.5  | 9.3  | 9.7  | 10.0 | 9.5  | 10.5 | 10.4 | 8.8  | 9.4  |
| Unc13a    | 0.1  | 0.1  | 0.1  | 0.1  | 0.1  | 0.2  | 0.2  | 0.1  | 0.2  | 0.2  | 0.1  | 0.2  |
| Unc13b    | 1.0  | 0.7  | 0.4  | 0.7  | 0.5  | 0.7  | 0.4  | 0.6  | 0.6  | 1.4  | 0.9  | 0.7  |
| Unc13c    | 0.1  | 0.1  | 0.0  | 0.0  | 0.1  | 0.1  | 0.1  | 0.0  | 0.0  | 0.4  | 0.2  | 0.1  |
| Unc13d    | 0.2  | 0.0  | 0.1  | 0.9  | 1.2  | 0.2  | 0.2  | 0.1  | 0.0  | 0.1  | 0.1  | 0.1  |
| Unc45a    | 11.2 | 10.6 | 8.9  | 11.6 | 10.6 | 11.3 | 10.8 | 11.0 | 10.3 | 11.5 | 10.1 | 9.5  |
| Unc45b    | 0.0  | 0.0  | 0.0  | 0.0  | 0.0  | 0.0  | 0.0  | 0.0  | 0.0  | 0.1  | 0.0  | 0.0  |

Online Table 1

|         |       |       |       |       |       |       |       |       |       |       |       |       |
|---------|-------|-------|-------|-------|-------|-------|-------|-------|-------|-------|-------|-------|
| Unc50   | 29.1  | 29.3  | 22.5  | 28.5  | 27.2  | 29.9  | 24.2  | 25.3  | 30.0  | 27.2  | 29.1  | 25.3  |
| Unc5a   | 0.7   | 0.7   | 0.7   | 0.9   | 0.7   | 0.7   | 1.0   | 0.9   | 0.6   | 0.6   | 0.5   | 0.5   |
| Unc5b   | 50.5  | 66.3  | 65.8  | 46.8  | 65.9  | 49.6  | 89.6  | 70.5  | 87.6  | 73.8  | 64.4  | 77.7  |
| Unc5c   | 0.3   | 0.2   | 0.4   | 0.2   | 0.2   | 0.2   | 0.3   | 0.4   | 0.2   | 0.2   | 0.2   | 0.3   |
| Unc5d   | 0.0   | 0.0   | 0.0   | 0.0   | 0.0   | 0.0   | 0.0   | 0.0   | 0.0   | 0.0   | 0.0   | 0.0   |
| Unc79   | 0.1   | 0.3   | 0.4   | 0.1   | 0.1   | 0.1   | 0.1   | 0.1   | 0.1   | 0.0   | 0.1   | 0.1   |
| Unc80   | 0.0   | 0.0   | 0.0   | 0.0   | 0.0   | 0.0   | 0.0   | 0.0   | 0.0   | 0.0   | 0.0   | 0.0   |
| Unc93a  | 0.0   | 0.1   | 0.0   | 0.0   | 0.0   | 0.0   | 0.0   | 0.1   | 0.0   | 0.0   | 0.0   | 0.0   |
| Unc93b1 | 12.2  | 17.5  | 16.6  | 26.2  | 36.8  | 16.3  | 15.5  | 15.5  | 13.5  | 9.7   | 8.6   | 9.9   |
| Ung     | 0.3   | 0.5   | 0.7   | 0.6   | 0.7   | 0.3   | 0.7   | 0.8   | 0.5   | 0.5   | 0.8   | 0.5   |
| Unk     | 1.8   | 1.8   | 1.7   | 1.8   | 1.8   | 1.3   | 2.0   | 2.0   | 1.9   | 1.8   | 1.4   | 1.5   |
| Unkl    | 2.2   | 3.3   | 3.3   | 3.0   | 2.3   | 2.6   | 3.0   | 2.5   | 3.1   | 3.1   | 2.8   | 2.8   |
| Upb1    | 0.0   | 0.0   | 0.0   | 0.0   | 0.0   | 0.0   | 0.1   | 0.0   | 0.0   | 0.0   | 0.0   | 0.0   |
| Upf1    | 10.2  | 9.8   | 12.4  | 10.9  | 10.9  | 10.4  | 15.3  | 13.4  | 12.8  | 10.2  | 11.2  | 11.9  |
| Upf2    | 11.0  | 10.0  | 12.0  | 13.7  | 11.2  | 10.0  | 14.2  | 10.7  | 9.4   | 10.5  | 12.8  | 16.0  |
| Upf3a   | 32.3  | 32.5  | 39.8  | 38.7  | 26.9  | 31.1  | 35.1  | 30.4  | 26.0  | 28.6  | 35.4  | 38.7  |
| Upf3b   | 8.4   | 7.1   | 10.4  | 7.8   | 7.2   | 7.7   | 9.9   | 8.0   | 5.7   | 7.5   | 9.7   | 10.5  |
| Upk1a   | 0.1   | 0.3   | 0.1   | 0.0   | 0.1   | 0.1   | 0.1   | 0.1   | 0.1   | 0.0   | 0.1   | 0.0   |
| Upk1b   | 64.6  | 13.4  | 3.8   | 15.3  | 6.0   | 8.2   | 4.3   | 7.4   | 11.7  | 233.9 | 116.7 | 51.5  |
| Upk3b   | 51.3  | 33.1  | 21.6  | 16.5  | 12.2  | 6.8   | 18.7  | 31.8  | 23.4  | 199.5 | 99.0  | 53.3  |
| Upk3bl  | 0.1   | 0.0   | 0.1   | 0.0   | 0.0   | 0.0   | 0.0   | 0.1   | 0.0   | 0.0   | 0.0   | 0.0   |
| Upp1    | 0.3   | 0.1   | 0.2   | 0.4   | 0.3   | 0.1   | 0.2   | 0.2   | 0.3   | 0.1   | 0.2   | 0.1   |
| Upp2    | 0.0   | 0.0   | 0.1   | 0.1   | 0.1   | 0.1   | 0.0   | 0.0   | 0.1   | 0.1   | 0.1   | 0.1   |
| Uprt    | 7.1   | 6.2   | 5.8   | 8.5   | 6.6   | 6.8   | 7.0   | 4.8   | 6.2   | 6.3   | 7.9   | 8.2   |
| Uqcc    | 8.1   | 7.8   | 8.3   | 9.8   | 8.3   | 9.1   | 8.6   | 7.7   | 8.8   | 9.1   | 8.8   | 9.6   |
| Uqcr10  | 133.9 | 102.0 | 85.7  | 114.1 | 104.0 | 105.7 | 94.3  | 94.9  | 104.3 | 131.6 | 105.3 | 108.9 |
| Uqcr11  | 222.3 | 175.2 | 135.2 | 185.0 | 186.3 | 214.3 | 171.9 | 166.9 | 168.9 | 205.2 | 167.5 | 165.6 |
| Uqcrb   | 219.2 | 182.2 | 205.9 | 230.9 | 166.0 | 189.7 | 174.9 | 174.1 | 156.6 | 171.7 | 197.8 | 229.6 |
| Uqcrc1  | 51.6  | 48.4  | 43.8  | 48.8  | 47.3  | 45.9  | 46.1  | 48.1  | 46.5  | 46.9  | 44.6  | 43.8  |
| Uqcrc2  | 47.7  | 44.3  | 41.5  | 45.5  | 41.6  | 43.6  | 39.2  | 43.0  | 43.1  | 48.1  | 48.0  | 44.0  |
| Uqcrfs1 | 41.7  | 33.3  | 29.8  | 30.3  | 32.7  | 28.6  | 29.1  | 32.1  | 34.8  | 41.1  | 29.8  | 33.3  |
| Uqcrh   | 274.5 | 217.5 | 225.6 | 227.3 | 189.7 | 236.1 | 210.3 | 242.6 | 201.7 | 253.4 | 253.9 | 268.8 |
| Uqcrq   | 100.4 | 72.0  | 71.1  | 79.1  | 84.1  | 78.4  | 71.6  | 99.9  | 84.3  | 83.8  | 85.0  | 75.2  |
| Urb1    | 2.0   | 1.6   | 1.5   | 1.6   | 1.8   | 1.8   | 1.8   | 1.4   | 1.4   | 1.8   | 1.4   | 1.5   |
| Urb2    | 3.4   | 3.3   | 2.6   | 3.0   | 3.8   | 2.8   | 3.3   | 3.1   | 3.1   | 3.2   | 3.5   | 2.9   |
| Urgcp   | 8.2   | 8.4   | 7.1   | 7.7   | 7.2   | 7.5   | 8.0   | 7.1   | 8.1   | 8.7   | 6.6   | 7.5   |
| Uri1    | 11.1  | 9.3   | 9.5   | 12.0  | 9.0   | 10.3  | 9.6   | 10.5  | 8.9   | 10.1  | 10.1  | 10.8  |
| Urm1    | 12.6  | 10.8  | 8.9   | 14.5  | 11.1  | 12.8  | 12.3  | 11.0  | 11.1  | 13.2  | 11.8  | 9.8   |
| Uroc1   | 0.0   | 0.0   | 0.0   | 0.0   | 0.0   | 0.0   | 0.0   | 0.0   | 0.0   | 0.0   | 0.0   | 0.0   |
| Urod    | 22.9  | 22.6  | 21.2  | 19.7  | 19.3  | 26.2  | 17.4  | 22.3  | 18.5  | 21.2  | 17.3  | 20.7  |
| Uros    | 9.0   | 8.7   | 7.0   | 8.5   | 7.3   | 7.7   | 8.2   | 7.8   | 8.5   | 9.0   | 9.8   | 9.3   |
| Usb1    | 7.3   | 6.7   | 6.6   | 7.7   | 8.3   | 6.3   | 7.5   | 6.6   | 6.6   | 6.7   | 7.5   | 6.6   |
| Use1    | 73.4  | 55.4  | 52.7  | 53.3  | 47.7  | 67.6  | 50.9  | 60.0  | 60.0  | 63.1  | 59.0  | 65.8  |
| Usf1    | 9.9   | 8.4   | 9.5   | 9.9   | 10.0  | 10.2  | 10.1  | 9.7   | 9.6   | 12.4  | 9.8   | 10.6  |
| Usf2    | 12.8  | 11.3  | 12.8  | 15.0  | 11.3  | 13.9  | 11.8  | 12.0  | 10.1  | 10.3  | 11.5  | 11.0  |
| Ush1c   | 0.0   | 0.0   | 0.0   | 0.1   | 0.0   | 0.1   | 0.0   | 0.0   | 0.0   | 0.0   | 0.0   | 0.0   |
| Ush1g   | 0.0   | 0.0   | 0.0   | 0.0   | 0.0   | 0.0   | 0.0   | 0.0   | 0.0   | 0.0   | 0.1   | 0.0   |
| Ush2a   | 0.0   | 0.0   | 0.0   | 0.0   | 0.0   | 0.0   | 0.0   | 0.0   | 0.0   | 0.0   | 0.0   | 0.0   |
| Ushbp1  | 0.1   | 0.0   | 0.1   | 0.0   | 0.1   | 0.0   | 0.1   | 0.1   | 0.2   | 0.0   | 0.0   | 0.0   |
| Usmg5   | 184.8 | 191.3 | 158.4 | 175.9 | 167.6 | 179.4 | 142.4 | 159.8 | 164.7 | 198.8 | 204.6 | 183.2 |
| Uso1    | 15.0  | 15.1  | 14.6  | 15.7  | 17.3  | 15.8  | 17.0  | 15.1  | 14.6  | 16.9  | 18.4  | 19.1  |
| Usp1    | 5.7   | 6.2   | 8.9   | 4.7   | 7.0   | 5.1   | 9.6   | 8.1   | 7.0   | 6.3   | 8.7   | 8.0   |
| Usp10   | 7.7   | 7.3   | 6.8   | 7.6   | 7.6   | 7.3   | 9.1   | 6.6   | 7.5   | 6.9   | 7.3   | 6.7   |
| Usp11   | 1.4   | 1.2   | 1.9   | 1.4   | 1.3   | 1.3   | 1.4   | 1.6   | 1.6   | 2.0   | 1.5   | 1.6   |
| Usp12   | 11.5  | 14.0  | 13.5  | 11.0  | 12.6  | 9.0   | 13.2  | 11.0  | 13.7  | 13.7  | 14.1  | 14.4  |
| Usp13   | 1.0   | 1.2   | 1.2   | 0.8   | 0.9   | 1.3   | 1.2   | 1.3   | 1.5   | 2.1   | 1.7   | 1.6   |
| Usp14   | 18.4  | 18.2  | 14.8  | 19.8  | 19.1  | 20.0  | 16.0  | 15.0  | 17.7  | 19.9  | 19.8  | 18.6  |

Online Table 1

|         |      |      |      |      |      |      |      |      |      |      |      |      |
|---------|------|------|------|------|------|------|------|------|------|------|------|------|
| Usp15   | 28.8 | 24.4 | 24.6 | 27.7 | 24.2 | 25.7 | 23.2 | 23.0 | 20.4 | 26.6 | 29.6 | 27.8 |
| Usp16   | 29.1 | 24.7 | 23.7 | 30.1 | 27.1 | 21.3 | 28.6 | 26.9 | 25.1 | 24.1 | 31.8 | 30.1 |
| Usp17la | 0.0  | 0.1  | 0.1  | 0.0  | 0.0  | 0.0  | 0.1  | 0.1  | 0.0  | 0.0  | 0.1  | 0.0  |
| Usp18   | 8.2  | 2.7  | 3.6  | 8.0  | 3.1  | 4.0  | 3.6  | 1.6  | 2.4  | 1.1  | 3.2  | 6.3  |
| Usp19   | 26.4 | 26.4 | 25.1 | 25.6 | 25.0 | 26.0 | 24.2 | 24.6 | 27.4 | 27.8 | 24.6 | 25.3 |
| Usp2    | 1.0  | 1.1  | 1.1  | 0.3  | 0.9  | 0.8  | 0.8  | 0.6  | 0.8  | 0.9  | 0.9  | 0.8  |
| Usp20   | 2.6  | 2.8  | 2.5  | 3.0  | 2.3  | 2.9  | 2.3  | 2.2  | 2.1  | 3.2  | 2.1  | 2.0  |
| Usp21   | 5.5  | 7.4  | 8.2  | 5.4  | 6.9  | 6.2  | 5.7  | 6.9  | 7.7  | 7.5  | 5.5  | 6.5  |
| Usp22   | 17.8 | 18.6 | 15.1 | 18.3 | 15.4 | 20.8 | 16.2 | 16.1 | 14.0 | 15.0 | 16.0 | 12.5 |
| Usp24   | 10.6 | 10.5 | 8.8  | 9.4  | 9.9  | 9.9  | 9.0  | 8.7  | 8.5  | 8.0  | 9.2  | 8.4  |
| Usp25   | 18.1 | 18.2 | 20.2 | 19.7 | 19.0 | 18.0 | 19.9 | 18.5 | 20.1 | 21.5 | 23.8 | 25.0 |
| Usp27x  | 1.0  | 0.7  | 1.1  | 1.0  | 0.8  | 0.9  | 0.8  | 0.9  | 0.9  | 1.0  | 0.7  | 0.9  |
| Usp28   | 1.9  | 2.6  | 2.7  | 2.2  | 2.2  | 2.3  | 2.5  | 2.7  | 2.5  | 2.2  | 2.7  | 2.1  |
| Usp29   | 0.0  | 0.0  | 0.0  | 0.0  | 0.0  | 0.0  | 0.0  | 0.0  | 0.0  | 0.0  | 0.0  | 0.0  |
| Usp3    | 8.6  | 7.6  | 9.2  | 7.9  | 7.8  | 8.3  | 7.8  | 8.3  | 6.4  | 8.2  | 9.0  | 8.1  |
| Usp30   | 9.2  | 8.5  | 7.9  | 9.7  | 7.3  | 10.3 | 9.1  | 7.8  | 8.1  | 8.5  | 8.5  | 9.0  |
| Usp31   | 3.7  | 4.4  | 3.8  | 3.8  | 3.7  | 3.5  | 3.4  | 3.2  | 3.8  | 3.7  | 3.9  | 3.2  |
| Usp32   | 10.2 | 11.5 | 10.8 | 9.9  | 10.1 | 9.6  | 9.0  | 8.4  | 8.5  | 9.7  | 10.9 | 10.2 |
| Usp33   | 15.8 | 15.7 | 16.3 | 16.8 | 14.6 | 16.4 | 16.4 | 14.8 | 16.1 | 17.8 | 18.7 | 19.4 |
| Usp34   | 6.5  | 7.3  | 6.2  | 6.5  | 6.8  | 6.7  | 7.0  | 6.4  | 6.3  | 6.8  | 6.9  | 6.4  |
| Usp35   | 2.0  | 1.9  | 1.6  | 1.5  | 1.7  | 1.4  | 1.7  | 1.5  | 1.7  | 1.6  | 1.3  | 1.9  |
| Usp36   | 2.1  | 2.1  | 2.2  | 2.2  | 2.0  | 1.9  | 2.3  | 2.3  | 2.5  | 2.1  | 2.1  | 1.9  |
| Usp37   | 1.7  | 2.5  | 2.8  | 1.8  | 2.4  | 1.8  | 2.4  | 2.4  | 2.3  | 2.4  | 2.7  | 2.2  |
| Usp38   | 6.6  | 6.6  | 5.1  | 6.4  | 6.3  | 6.1  | 6.0  | 6.0  | 6.5  | 6.8  | 7.1  | 7.0  |
| Usp39   | 18.8 | 18.8 | 18.4 | 20.3 | 17.3 | 18.2 | 18.8 | 20.7 | 17.3 | 18.9 | 20.7 | 17.7 |
| Usp4    | 28.6 | 26.0 | 22.8 | 28.7 | 26.4 | 28.0 | 27.6 | 26.3 | 26.9 | 25.8 | 28.5 | 26.4 |
| Usp40   | 8.2  | 8.9  | 9.8  | 7.4  | 7.6  | 8.7  | 8.6  | 10.4 | 9.9  | 10.5 | 9.8  | 9.7  |
| Usp42   | 2.1  | 2.7  | 3.5  | 2.4  | 2.4  | 2.2  | 3.0  | 3.2  | 3.3  | 2.2  | 2.9  | 2.7  |
| Usp44   | 0.0  | 0.0  | 0.0  | 0.0  | 0.0  | 0.0  | 0.0  | 0.0  | 0.0  | 0.0  | 0.0  | 0.0  |
| Usp45   | 5.8  | 7.3  | 7.5  | 6.7  | 6.8  | 6.4  | 6.1  | 6.2  | 6.5  | 6.1  | 7.3  | 6.9  |
| Usp46   | 22.0 | 23.8 | 19.8 | 19.3 | 17.1 | 21.4 | 18.2 | 23.5 | 18.5 | 17.9 | 22.4 | 19.0 |
| Usp47   | 39.9 | 41.6 | 39.5 | 39.5 | 36.3 | 38.2 | 40.4 | 38.4 | 39.1 | 39.1 | 46.0 | 45.1 |
| Usp48   | 7.7  | 7.9  | 8.6  | 8.3  | 8.3  | 8.7  | 7.9  | 8.7  | 8.4  | 7.9  | 8.7  | 8.8  |
| Usp49   | 1.3  | 1.8  | 1.4  | 1.5  | 1.5  | 1.0  | 1.4  | 1.3  | 1.7  | 1.3  | 1.8  | 1.3  |
| Usp5    | 38.2 | 33.6 | 28.6 | 39.7 | 35.2 | 36.6 | 39.2 | 35.3 | 36.4 | 37.3 | 35.1 | 33.6 |
| Usp50   | 0.0  | 0.0  | 0.0  | 0.0  | 0.0  | 0.0  | 0.0  | 0.0  | 0.0  | 0.0  | 0.1  | 0.0  |
| Usp51   | 0.1  | 0.0  | 0.0  | 0.1  | 0.1  | 0.0  | 0.2  | 0.1  | 0.0  | 0.1  | 0.0  | 0.0  |
| Usp53   | 9.4  | 7.6  | 6.0  | 11.3 | 6.8  | 9.0  | 8.5  | 6.7  | 9.4  | 15.6 | 15.8 | 14.6 |
| Usp54   | 3.1  | 2.7  | 2.6  | 3.0  | 2.2  | 2.8  | 2.4  | 2.1  | 1.8  | 2.6  | 2.8  | 2.7  |
| Usp6nl  | 3.5  | 3.9  | 3.8  | 3.5  | 3.6  | 3.6  | 4.1  | 3.1  | 3.5  | 3.4  | 3.7  | 4.0  |
| Usp7    | 16.7 | 17.9 | 17.4 | 18.5 | 16.8 | 16.4 | 17.5 | 17.1 | 16.2 | 15.7 | 18.3 | 17.6 |
| Usp8    | 28.9 | 29.4 | 30.4 | 34.5 | 28.3 | 29.4 | 28.1 | 28.5 | 26.1 | 29.9 | 31.8 | 34.3 |
| Usp9x   | 45.2 | 53.5 | 49.3 | 44.4 | 47.2 | 48.0 | 44.6 | 49.1 | 51.1 | 47.6 | 52.5 | 50.8 |
| Usp9y   | 0.0  | 0.0  | 0.0  | 0.0  | 0.0  | 0.0  | 0.1  | 0.0  | 0.0  | 0.0  | 0.0  | 0.0  |
| Uspi1   | 5.1  | 4.9  | 4.0  | 5.5  | 5.5  | 5.2  | 5.0  | 4.6  | 4.9  | 6.0  | 5.2  | 4.5  |
| Ust     | 5.2  | 5.6  | 6.1  | 6.0  | 6.3  | 4.9  | 4.9  | 4.6  | 4.8  | 3.9  | 4.3  | 5.1  |
| Utf1    | 0.0  | 0.0  | 0.0  | 0.0  | 0.0  | 0.0  | 0.0  | 0.0  | 0.0  | 0.0  | 0.0  | 0.0  |
| Utp11l  | 33.2 | 33.1 | 35.0 | 38.1 | 32.5 | 32.6 | 39.0 | 32.1 | 29.3 | 33.5 | 40.2 | 38.9 |
| Utp14a  | 9.6  | 7.0  | 6.6  | 9.1  | 7.4  | 8.6  | 6.6  | 6.4  | 5.6  | 7.3  | 7.7  | 7.1  |
| Utp14b  | 2.5  | 3.3  | 2.9  | 1.6  | 2.4  | 1.9  | 4.2  | 3.9  | 2.9  | 1.5  | 2.8  | 2.0  |
| Utp15   | 3.9  | 3.5  | 3.5  | 3.9  | 4.7  | 4.5  | 3.4  | 3.2  | 3.4  | 3.5  | 3.6  | 3.1  |
| Utp18   | 10.3 | 8.9  | 7.8  | 9.5  | 9.4  | 9.0  | 9.8  | 10.0 | 8.6  | 10.3 | 10.8 | 9.6  |
| Utp20   | 8.9  | 7.6  | 6.8  | 7.5  | 8.5  | 8.4  | 7.2  | 6.5  | 6.3  | 7.4  | 7.4  | 7.2  |
| Utp23   | 2.4  | 2.7  | 2.8  | 2.3  | 2.7  | 2.9  | 2.5  | 2.6  | 2.6  | 2.7  | 2.6  | 3.2  |
| Utp3    | 31.5 | 25.7 | 28.1 | 36.1 | 27.4 | 30.3 | 32.4 | 24.7 | 24.0 | 29.1 | 34.1 | 35.9 |
| Utp6    | 19.0 | 17.1 | 17.9 | 23.7 | 17.8 | 20.9 | 19.2 | 17.6 | 15.3 | 20.1 | 20.1 | 20.7 |
| Utrn    | 24.3 | 22.3 | 20.9 | 23.6 | 20.3 | 26.1 | 20.3 | 17.6 | 17.5 | 21.1 | 23.3 | 21.0 |

Online Table 1

|          |        |        |        |        |        |        |        |        |        |        |        |        |
|----------|--------|--------|--------|--------|--------|--------|--------|--------|--------|--------|--------|--------|
| Uty      | 5.3    | 5.6    | 6.2    | 5.9    | 5.7    | 6.0    | 4.2    | 5.0    | 4.7    | 6.2    | 5.2    | 5.9    |
| Uvrag    | 21.7   | 23.4   | 23.4   | 20.9   | 22.8   | 17.5   | 23.0   | 18.3   | 25.0   | 20.7   | 21.4   | 23.0   |
| Uvssa    | 3.2    | 3.9    | 4.7    | 3.2    | 2.8    | 3.9    | 3.3    | 3.8    | 3.0    | 2.6    | 3.3    | 3.8    |
| Uxs1     | 26.8   | 20.4   | 21.1   | 22.7   | 21.2   | 20.7   | 24.1   | 22.1   | 17.8   | 18.6   | 21.7   | 21.1   |
| Uxt      | 13.4   | 12.5   | 11.1   | 12.7   | 12.3   | 11.7   | 11.6   | 11.9   | 11.6   | 10.3   | 9.8    | 10.4   |
| Vac14    | 5.5    | 4.4    | 4.3    | 6.4    | 5.4    | 5.4    | 5.5    | 5.2    | 5.2    | 3.8    | 4.2    | 3.9    |
| Vamp1    | 0.3    | 0.2    | 0.2    | 0.2    | 0.3    | 0.3    | 0.2    | 0.3    | 0.2    | 0.2    | 0.2    | 0.1    |
| Vamp2    | 2.6    | 2.4    | 2.8    | 2.2    | 2.3    | 2.7    | 3.4    | 3.3    | 3.0    | 2.4    | 1.8    | 2.8    |
| Vamp3    | 48.9   | 47.4   | 42.6   | 46.0   | 46.4   | 43.0   | 44.3   | 47.3   | 49.8   | 45.8   | 53.0   | 41.3   |
| Vamp4    | 5.1    | 6.5    | 7.2    | 5.6    | 5.3    | 6.5    | 4.5    | 5.3    | 5.6    | 5.5    | 6.4    | 6.8    |
| Vamp5    | 18.5   | 30.4   | 28.6   | 15.4   | 25.9   | 20.1   | 37.0   | 51.6   | 46.2   | 32.5   | 36.8   | 32.2   |
| Vamp8    | 48.5   | 33.9   | 34.6   | 65.8   | 44.7   | 38.8   | 48.5   | 41.7   | 42.5   | 53.9   | 53.1   | 52.8   |
| Vangl1   | 5.7    | 6.0    | 6.5    | 6.4    | 6.1    | 6.1    | 8.6    | 7.7    | 7.6    | 6.0    | 6.8    | 6.7    |
| Vangl2   | 1.2    | 1.5    | 1.2    | 0.6    | 0.7    | 1.1    | 1.2    | 1.9    | 1.7    | 1.1    | 0.9    | 1.0    |
| Vapa     | 84.8   | 84.1   | 72.9   | 86.8   | 86.7   | 72.5   | 91.6   | 86.1   | 99.5   | 80.5   | 102.3  | 92.2   |
| Vapb     | 18.1   | 15.2   | 12.5   | 18.9   | 15.0   | 17.8   | 14.7   | 13.0   | 12.6   | 15.2   | 15.6   | 14.1   |
| Vars     | 15.1   | 13.3   | 12.3   | 13.1   | 12.1   | 14.3   | 15.1   | 14.9   | 14.5   | 12.5   | 13.5   | 10.5   |
| Vars2    | 3.5    | 3.9    | 3.5    | 3.2    | 2.7    | 4.1    | 3.2    | 4.0    | 3.3    | 2.7    | 2.7    | 2.6    |
| Vash1    | 1.4    | 1.2    | 1.7    | 1.1    | 1.2    | 0.8    | 0.9    | 2.4    | 1.4    | 0.6    | 0.4    | 0.6    |
| Vash2    | 0.3    | 0.6    | 1.0    | 0.1    | 0.4    | 0.5    | 0.6    | 1.1    | 0.9    | 0.3    | 0.6    | 0.5    |
| Vasn     | 16.8   | 19.0   | 19.3   | 15.7   | 17.3   | 17.7   | 23.6   | 21.0   | 21.0   | 23.8   | 19.6   | 17.8   |
| Vasp     | 22.9   | 25.4   | 23.3   | 26.8   | 37.2   | 20.0   | 29.6   | 27.3   | 33.8   | 28.9   | 28.1   | 24.7   |
| Vat1     | 111.0  | 82.3   | 60.6   | 136.1  | 85.9   | 135.8  | 79.5   | 83.0   | 72.1   | 80.1   | 79.0   | 78.8   |
| Vat1l    | 4.6    | 0.3    | 0.0    | 1.1    | 0.2    | 0.2    | 0.1    | 0.6    | 0.6    | 28.1   | 14.5   | 3.4    |
| Vaultrc5 | 106.0  | 94.0   | 89.6   | 111.6  | 140.9  | 92.9   | 71.8   | 104.1  | 152.4  | 78.4   | 70.3   | 121.0  |
| Vav1     | 0.6    | 0.0    | 0.1    | 5.7    | 11.1   | 0.0    | 1.6    | 0.1    | 0.2    | 0.7    | 0.2    | 0.7    |
| Vav2     | 11.7   | 14.2   | 12.8   | 8.2    | 10.7   | 7.2    | 17.5   | 19.7   | 15.2   | 15.9   | 18.6   | 16.2   |
| Vav3     | 0.6    | 0.8    | 1.3    | 1.6    | 2.4    | 0.2    | 0.6    | 2.1    | 1.1    | 1.0    | 0.8    | 1.0    |
| Vax2     | 4.1    | 2.3    | 1.0    | 4.2    | 1.9    | 4.5    | 1.4    | 1.1    | 1.1    | 1.3    | 1.1    | 1.1    |
| Vbp1     | 23.5   | 27.6   | 27.4   | 25.3   | 26.8   | 24.7   | 25.0   | 25.7   | 29.4   | 29.8   | 30.4   | 30.9   |
| Vcam1    | 212.8  | 170.3  | 212.1  | 177.1  | 285.3  | 146.5  | 144.1  | 141.5  | 150.9  | 206.9  | 134.6  | 247.3  |
| Vcan     | 2.9    | 4.9    | 8.7    | 1.4    | 6.3    | 1.6    | 8.9    | 20.8   | 7.3    | 6.8    | 8.8    | 6.3    |
| Vcl      | 94.0   | 101.0  | 84.6   | 86.5   | 86.0   | 73.7   | 104.6  | 69.7   | 104.5  | 106.2  | 117.4  | 98.3   |
| Vcp      | 244.6  | 217.7  | 202.7  | 244.3  | 225.5  | 226.8  | 240.3  | 241.5  | 224.9  | 245.7  | 251.3  | 245.7  |
| Vcpip1   | 6.8    | 7.7    | 8.2    | 8.0    | 8.8    | 8.0    | 7.6    | 8.0    | 7.3    | 9.1    | 8.9    | 9.1    |
| Vdac1    | 110.6  | 106.8  | 98.5   | 112.2  | 110.8  | 116.4  | 104.3  | 97.8   | 96.5   | 122.5  | 124.9  | 106.4  |
| Vdac2    | 191.0  | 159.7  | 134.2  | 192.2  | 175.5  | 198.8  | 175.0  | 136.4  | 168.8  | 185.0  | 187.0  | 186.1  |
| Vdac3    | 112.9  | 87.3   | 64.6   | 96.2   | 82.1   | 97.3   | 71.8   | 76.7   | 84.5   | 80.3   | 82.8   | 76.2   |
| Vdr      | 0.9    | 1.6    | 2.1    | 1.3    | 2.0    | 0.7    | 3.4    | 3.0    | 3.1    | 3.6    | 3.3    | 2.9    |
| Vegfa    | 53.8   | 65.2   | 57.5   | 53.2   | 51.6   | 60.4   | 106.7  | 77.8   | 100.4  | 53.7   | 77.1   | 69.8   |
| Vegfb    | 6.2    | 6.1    | 5.3    | 7.2    | 5.0    | 8.8    | 4.6    | 5.0    | 4.8    | 4.1    | 5.5    | 3.9    |
| Vegfc    | 16.3   | 23.3   | 23.1   | 10.9   | 22.0   | 7.6    | 19.9   | 15.0   | 22.4   | 14.2   | 14.1   | 17.3   |
| Veph1    | 0.3    | 0.1    | 0.1    | 0.3    | 0.2    | 0.2    | 0.2    | 0.1    | 0.1    | 0.1    | 0.2    | 0.1    |
| VeZF1    | 10.9   | 10.0   | 10.0   | 12.4   | 9.2    | 11.9   | 9.7    | 9.1    | 8.9    | 9.4    | 12.0   | 10.4   |
| VeZt     | 6.3    | 5.1    | 5.2    | 5.9    | 5.8    | 6.3    | 6.7    | 5.7    | 6.7    | 6.2    | 6.7    | 7.3    |
| Vgf      | 0.3    | 0.5    | 0.4    | 1.0    | 0.3    | 0.7    | 0.5    | 0.1    | 0.4    | 0.5    | 0.4    | 0.1    |
| Vgl3     | 65.7   | 94.8   | 88.7   | 83.6   | 73.2   | 84.8   | 87.0   | 84.7   | 84.4   | 70.5   | 93.3   | 83.4   |
| Vgl4     | 8.9    | 9.3    | 9.6    | 11.9   | 10.0   | 11.2   | 9.5    | 10.9   | 9.9    | 14.0   | 8.8    | 9.6    |
| Vhl      | 10.0   | 10.1   | 9.5    | 7.7    | 9.6    | 8.0    | 8.9    | 9.5    | 11.3   | 10.6   | 10.2   | 11.0   |
| Vil1     | 0.0    | 0.0    | 0.0    | 0.0    | 0.0    | 0.0    | 0.0    | 0.0    | 0.0    | 0.1    | 0.0    | 0.0    |
| Vill     | 2.0    | 2.3    | 1.8    | 0.7    | 1.9    | 1.6    | 0.9    | 2.0    | 1.2    | 2.3    | 2.3    | 2.4    |
| Vim      | 1650.9 | 1202.6 | 1111.5 | 1427.9 | 1324.0 | 1453.6 | 1163.1 | 1246.8 | 1028.0 | 1065.0 | 1197.5 | 1038.4 |
| Vimp     | 84.1   | 76.4   | 79.7   | 90.3   | 77.7   | 74.4   | 98.8   | 73.1   | 89.4   | 86.1   | 94.2   | 98.8   |
| Vipas39  | 19.0   | 18.1   | 15.8   | 20.1   | 17.9   | 18.3   | 15.0   | 15.8   | 15.3   | 16.9   | 15.8   | 18.1   |
| Vipr1    | 0.0    | 0.0    | 0.1    | 0.1    | 0.1    | 0.0    | 0.0    | 0.0    | 0.0    | 0.0    | 0.0    | 0.0    |
| Vipr2    | 0.1    | 0.2    | 0.3    | 0.1    | 0.1    | 0.2    | 0.1    | 0.2    | 0.1    | 0.0    | 0.0    | 0.0    |
| Vit      | 5.8    | 2.5    | 3.4    | 2.7    | 2.1    | 2.2    | 1.7    | 3.7    | 0.7    | 2.6    | 3.6    | 1.9    |

Online Table 1

|             |      |      |      |      |      |      |      |      |      |      |      |      |
|-------------|------|------|------|------|------|------|------|------|------|------|------|------|
| Vkorc1      | 76.3 | 72.0 | 65.8 | 79.7 | 71.3 | 72.7 | 69.3 | 72.4 | 67.5 | 80.5 | 73.2 | 78.1 |
| Vkorc1I1    | 6.7  | 8.7  | 8.5  | 8.6  | 7.5  | 7.1  | 8.2  | 8.4  | 11.3 | 9.1  | 10.6 | 8.3  |
| Vldlr       | 3.7  | 4.0  | 3.6  | 3.3  | 2.0  | 3.8  | 2.7  | 3.7  | 4.0  | 4.5  | 4.0  | 3.6  |
| Vma21       | 4.9  | 4.9  | 7.4  | 9.1  | 6.9  | 7.0  | 6.5  | 5.5  | 5.1  | 6.0  | 7.7  | 7.9  |
| Vmac        | 8.0  | 7.0  | 6.3  | 8.6  | 7.5  | 9.0  | 7.4  | 6.3  | 5.9  | 7.8  | 7.6  | 7.0  |
| Vmn1r45     | 0.1  | 0.0  | 0.0  | 0.0  | 0.0  | 0.0  | 0.0  | 0.0  | 0.0  | 0.0  | 0.0  | 0.0  |
| Vmn1r51     | 0.0  | 0.0  | 0.0  | 0.1  | 0.0  | 0.0  | 0.0  | 0.1  | 0.0  | 0.0  | 0.1  | 0.0  |
| Vmn1r53     | 0.1  | 0.1  | 0.1  | 0.0  | 0.1  | 0.0  | 0.1  | 0.1  | 0.1  | 0.1  | 0.2  | 0.0  |
| Vmn1r58     | 1.2  | 1.9  | 1.7  | 1.0  | 1.9  | 1.2  | 1.8  | 1.2  | 1.4  | 1.6  | 1.2  | 1.3  |
| Vmn1r65     | 0.0  | 0.0  | 0.0  | 0.1  | 0.0  | 0.0  | 0.0  | 0.0  | 0.0  | 0.0  | 0.0  | 0.0  |
| Vmn1r90     | 0.0  | 0.0  | 0.0  | 0.0  | 0.0  | 0.0  | 0.0  | 0.0  | 0.0  | 0.0  | 0.0  | 0.0  |
| Vmn2r1      | 0.1  | 0.1  | 0.1  | 0.1  | 0.0  | 0.0  | 0.0  | 0.1  | 0.1  | 0.0  | 0.1  | 0.0  |
| Vmn2r2      | 0.0  | 0.0  | 0.0  | 0.0  | 0.0  | 0.0  | 0.0  | 0.0  | 0.0  | 0.0  | 0.0  | 0.0  |
| Vmn2r29     | 0.8  | 1.4  | 1.1  | 0.7  | 1.0  | 1.2  | 0.7  | 0.9  | 0.8  | 1.6  | 1.6  | 1.2  |
| Vmn2r3      | 0.0  | 0.0  | 0.0  | 0.0  | 0.0  | 0.0  | 0.0  | 0.0  | 0.0  | 0.0  | 0.0  | 0.0  |
| Vmn2r30     | 0.0  | 0.0  | 0.0  | 0.0  | 0.0  | 0.0  | 0.0  | 0.0  | 0.0  | 0.0  | 0.0  | 0.0  |
| Vmn2r31     | 0.0  | 0.0  | 0.0  | 0.0  | 0.0  | 0.0  | 0.1  | 0.0  | 0.0  | 0.0  | 0.0  | 0.0  |
| Vmn2r33     | 0.0  | 0.0  | 0.0  | 0.0  | 0.0  | 0.0  | 0.0  | 0.0  | 0.0  | 0.0  | 0.0  | 0.0  |
| Vmn2r34     | 0.0  | 0.0  | 0.0  | 0.0  | 0.0  | 0.0  | 0.0  | 0.0  | 0.0  | 0.0  | 0.0  | 0.0  |
| Vmn2r37     | 0.0  | 0.0  | 0.0  | 0.0  | 0.0  | 0.0  | 0.0  | 0.0  | 0.0  | 0.0  | 0.0  | 0.0  |
| Vmn2r38     | 0.0  | 0.0  | 0.0  | 0.0  | 0.0  | 0.0  | 0.0  | 0.0  | 0.0  | 0.0  | 0.0  | 0.0  |
| Vmn2r39     | 0.0  | 0.0  | 0.0  | 0.0  | 0.0  | 0.0  | 0.0  | 0.0  | 0.0  | 0.0  | 0.0  | 0.0  |
| Vmn2r4      | 0.0  | 0.0  | 0.0  | 0.0  | 0.0  | 0.0  | 0.0  | 0.0  | 0.0  | 0.0  | 0.0  | 0.0  |
| Vmn2r43     | 0.0  | 0.0  | 0.0  | 0.0  | 0.0  | 0.0  | 0.0  | 0.0  | 0.0  | 0.0  | 0.0  | 0.0  |
| Vmn2r44     | 0.0  | 0.0  | 0.0  | 0.0  | 0.0  | 0.0  | 0.0  | 0.0  | 0.0  | 0.0  | 0.0  | 0.0  |
| Vmn2r45     | 0.0  | 0.0  | 0.0  | 0.0  | 0.0  | 0.0  | 0.0  | 0.0  | 0.0  | 0.0  | 0.0  | 0.0  |
| Vmn2r46     | 0.0  | 0.1  | 0.1  | 0.1  | 0.1  | 0.1  | 0.1  | 0.1  | 0.2  | 0.1  | 0.1  | 0.1  |
| Vmn2r47     | 0.0  | 0.0  | 0.0  | 0.0  | 0.0  | 0.0  | 0.0  | 0.0  | 0.0  | 0.0  | 0.0  | 0.0  |
| Vmn2r57     | 0.2  | 0.1  | 0.2  | 0.1  | 0.1  | 0.1  | 0.1  | 0.1  | 0.1  | 0.1  | 0.1  | 0.0  |
| Vmn2r62     | 0.0  | 0.0  | 0.0  | 0.0  | 0.0  | 0.0  | 0.0  | 0.0  | 0.0  | 0.0  | 0.0  | 0.0  |
| Vmn2r63     | 0.0  | 0.0  | 0.0  | 0.0  | 0.0  | 0.0  | 0.0  | 0.0  | 0.0  | 0.0  | 0.0  | 0.0  |
| Vmn2r-ps129 | 0.0  | 0.0  | 0.0  | 0.1  | 0.0  | 0.0  | 0.0  | 0.0  | 0.0  | 0.0  | 0.0  | 0.1  |
| Vmo1        | 1.1  | 1.1  | 0.8  | 2.0  | 0.7  | 1.4  | 1.1  | 1.5  | 0.7  | 0.9  | 1.0  | 1.0  |
| Vmp1        | 50.1 | 58.1 | 60.9 | 57.8 | 55.5 | 56.7 | 54.3 | 63.4 | 64.1 | 52.6 | 62.6 | 63.4 |
| Vnn1        | 8.9  | 4.0  | 3.5  | 5.4  | 3.8  | 4.1  | 2.6  | 1.2  | 1.8  | 9.1  | 5.9  | 3.0  |
| Vnn3        | 0.3  | 0.1  | 0.1  | 0.1  | 0.2  | 0.0  | 0.0  | 0.0  | 0.0  | 0.1  | 0.0  | 0.0  |
| Vopp1       | 36.5 | 27.7 | 22.3 | 41.7 | 28.3 | 38.3 | 28.5 | 16.5 | 24.2 | 28.3 | 27.2 | 27.9 |
| Vprbp       | 7.5  | 6.7  | 7.0  | 6.2  | 5.6  | 7.2  | 6.4  | 6.9  | 6.7  | 6.8  | 7.5  | 6.5  |
| Vpreb1      | 0.3  | 0.6  | 0.1  | 0.1  | 0.3  | 0.1  | 0.1  | 0.3  | 0.3  | 0.6  | 0.3  | 0.1  |
| Vpreb2      | 0.4  | 0.3  | 0.1  | 0.0  | 0.4  | 0.1  | 0.1  | 0.3  | 0.1  | 0.3  | 0.1  | 0.0  |
| Vpreb3      | 0.1  | 0.0  | 0.0  | 0.0  | 0.2  | 0.3  | 0.2  | 0.0  | 0.1  | 0.0  | 0.0  | 0.0  |
| Vps11       | 14.2 | 11.4 | 11.1 | 14.7 | 12.5 | 16.2 | 10.5 | 10.9 | 10.2 | 12.5 | 10.5 | 11.6 |
| Vps13a      | 5.9  | 5.9  | 5.8  | 6.2  | 5.5  | 6.8  | 4.4  | 5.8  | 4.5  | 6.5  | 7.0  | 5.4  |
| Vps13b      | 5.7  | 6.3  | 6.4  | 5.3  | 5.9  | 6.0  | 5.5  | 5.8  | 5.5  | 5.3  | 5.8  | 5.6  |
| Vps13c      | 4.1  | 4.5  | 4.4  | 3.8  | 5.0  | 4.2  | 3.3  | 4.0  | 3.2  | 3.6  | 3.3  | 3.7  |
| Vps13d      | 10.6 | 11.3 | 10.4 | 9.7  | 10.9 | 9.9  | 11.1 | 11.2 | 11.4 | 10.0 | 10.1 | 11.2 |
| Vps16       | 13.5 | 13.6 | 13.0 | 13.0 | 13.9 | 14.5 | 13.8 | 12.4 | 12.7 | 11.3 | 11.5 | 12.4 |
| Vps18       | 8.0  | 6.9  | 6.3  | 10.4 | 9.6  | 9.4  | 7.7  | 6.2  | 6.4  | 7.6  | 6.1  | 6.6  |
| Vps25       | 30.2 | 28.0 | 28.4 | 31.0 | 24.3 | 30.7 | 22.6 | 29.5 | 24.0 | 27.1 | 25.4 | 26.4 |
| Vps26a      | 39.4 | 37.1 | 32.9 | 50.3 | 36.0 | 41.9 | 35.8 | 31.7 | 29.8 | 37.1 | 40.9 | 43.5 |
| Vps26b      | 10.2 | 9.9  | 9.5  | 9.7  | 8.4  | 9.3  | 8.9  | 9.4  | 8.9  | 9.2  | 9.1  | 8.9  |
| Vps28       | 49.1 | 47.0 | 46.0 | 60.3 | 49.5 | 61.6 | 50.6 | 50.0 | 46.6 | 46.8 | 49.6 | 49.1 |
| Vps29       | 62.8 | 58.0 | 47.9 | 69.5 | 63.3 | 63.7 | 56.9 | 49.0 | 51.2 | 57.7 | 60.4 | 58.7 |
| Vps33a      | 9.1  | 8.6  | 8.3  | 11.5 | 8.5  | 9.2  | 8.4  | 7.9  | 7.9  | 7.3  | 8.0  | 8.4  |
| Vps33b      | 5.4  | 5.3  | 4.5  | 4.4  | 4.6  | 5.1  | 4.8  | 4.8  | 4.9  | 5.1  | 4.7  | 4.6  |
| Vps35       | 82.0 | 76.6 | 62.7 | 81.4 | 72.3 | 88.9 | 58.4 | 59.1 | 64.2 | 77.7 | 74.0 | 73.6 |
| Vps36       | 33.5 | 33.4 | 32.0 | 33.3 | 33.2 | 30.3 | 32.0 | 29.3 | 29.9 | 36.5 | 37.1 | 34.0 |

Online Table 1

|        |       |      |       |       |      |       |      |      |      |       |       |       |
|--------|-------|------|-------|-------|------|-------|------|------|------|-------|-------|-------|
| Vps37a | 8.2   | 8.4  | 8.1   | 9.0   | 7.9  | 8.3   | 8.0  | 6.9  | 7.5  | 8.9   | 8.8   | 9.0   |
| Vps37b | 2.4   | 1.7  | 1.9   | 2.0   | 2.2  | 1.9   | 2.2  | 2.6  | 2.7  | 3.2   | 2.1   | 2.2   |
| Vps37c | 5.5   | 5.4  | 5.3   | 5.5   | 5.9  | 5.5   | 6.0  | 5.8  | 5.7  | 5.6   | 5.7   | 5.4   |
| Vps37d | 1.6   | 1.7  | 1.6   | 1.0   | 1.1  | 2.1   | 1.4  | 1.9  | 1.9  | 1.8   | 1.5   | 1.9   |
| Vps39  | 14.0  | 13.7 | 12.7  | 15.9  | 12.6 | 15.0  | 11.9 | 12.4 | 10.8 | 10.9  | 12.1  | 11.8  |
| Vps41  | 64.7  | 51.2 | 49.2  | 67.5  | 50.0 | 61.9  | 43.7 | 44.5 | 41.4 | 49.7  | 53.4  | 56.0  |
| Vps45  | 6.7   | 6.9  | 5.5   | 7.7   | 6.5  | 7.8   | 4.8  | 5.3  | 5.6  | 6.5   | 5.4   | 6.5   |
| Vps4a  | 29.3  | 30.4 | 28.2  | 30.2  | 26.3 | 29.4  | 31.4 | 29.6 | 28.8 | 28.3  | 35.7  | 31.5  |
| Vps4b  | 19.8  | 21.1 | 21.5  | 22.6  | 24.1 | 20.6  | 21.4 | 21.3 | 23.0 | 22.0  | 23.2  | 23.9  |
| Vps51  | 4.9   | 5.1  | 5.2   | 5.3   | 5.3  | 5.5   | 4.9  | 6.5  | 5.9  | 6.2   | 5.2   | 5.1   |
| Vps52  | 16.4  | 16.7 | 16.9  | 15.3  | 16.9 | 16.8  | 16.1 | 16.7 | 17.0 | 16.3  | 13.8  | 15.3  |
| Vps53  | 16.7  | 14.7 | 13.7  | 18.0  | 16.6 | 16.0  | 15.1 | 16.2 | 14.1 | 17.8  | 17.9  | 18.1  |
| Vps54  | 6.4   | 6.9  | 7.3   | 6.2   | 6.0  | 5.0   | 6.0  | 6.7  | 7.8  | 7.2   | 8.1   | 7.8   |
| Vps72  | 9.8   | 9.2  | 10.5  | 11.1  | 9.5  | 12.2  | 10.4 | 11.5 | 10.3 | 10.2  | 11.7  | 10.6  |
| Vps8   | 12.0  | 10.8 | 9.9   | 10.6  | 10.2 | 12.6  | 9.9  | 10.0 | 10.2 | 10.3  | 10.8  | 11.1  |
| Vps9d1 | 2.9   | 3.6  | 3.5   | 2.5   | 3.4  | 3.7   | 3.8  | 3.8  | 3.6  | 2.8   | 2.9   | 3.0   |
| Vrk1   | 2.3   | 2.4  | 2.6   | 1.8   | 2.4  | 2.1   | 2.7  | 1.8  | 2.0  | 1.8   | 2.2   | 2.0   |
| Vrk2   | 9.2   | 8.6  | 7.6   | 8.5   | 8.5  | 9.3   | 6.9  | 7.1  | 8.2  | 7.1   | 8.4   | 8.4   |
| Vrk3   | 5.7   | 5.6  | 6.2   | 7.2   | 6.4  | 5.5   | 6.1  | 7.0  | 5.8  | 5.8   | 4.7   | 5.7   |
| Vsig10 | 1.6   | 2.0  | 2.4   | 2.1   | 1.6  | 1.7   | 2.6  | 1.8  | 1.9  | 1.8   | 1.7   | 2.2   |
| Vsig8  | 0.1   | 0.1  | 0.0   | 0.1   | 0.1  | 0.1   | 0.1  | 0.1  | 0.0  | 0.1   | 0.0   | 0.0   |
| Vstm2a | 0.1   | 0.1  | 0.1   | 0.1   | 0.1  | 0.0   | 0.0  | 0.0  | 0.0  | 0.0   | 0.0   | 0.1   |
| Vstm2b | 0.0   | 0.0  | 0.1   | 0.0   | 0.1  | 0.0   | 0.2  | 0.4  | 0.4  | 0.0   | 0.1   | 0.1   |
| Vstm4  | 0.3   | 0.2  | 0.3   | 0.2   | 0.1  | 0.4   | 0.2  | 0.5  | 0.7  | 0.5   | 0.5   | 0.4   |
| Vstm5  | 1.3   | 0.9  | 0.6   | 0.9   | 0.6  | 1.2   | 0.7  | 0.5  | 0.5  | 0.6   | 0.6   | 0.8   |
| Vta1   | 31.4  | 30.3 | 24.1  | 29.1  | 28.1 | 29.4  | 24.3 | 23.6 | 25.6 | 28.4  | 29.2  | 26.9  |
| Vtcn1  | 0.0   | 0.0  | 0.0   | 0.0   | 0.0  | 0.0   | 0.0  | 0.0  | 0.1  | 0.1   | 0.0   | 0.0   |
| Vti1a  | 8.7   | 9.0  | 9.2   | 8.3   | 6.9  | 8.2   | 8.6  | 9.4  | 6.8  | 6.6   | 8.1   | 8.2   |
| Vti1b  | 91.1  | 67.0 | 59.9  | 103.0 | 67.5 | 93.4  | 77.0 | 63.9 | 69.7 | 77.1  | 81.0  | 87.1  |
| Vtn    | 0.0   | 0.1  | 0.0   | 0.0   | 0.0  | 0.0   | 0.0  | 0.1  | 0.1  | 0.0   | 0.0   | 0.0   |
| Vwa1   | 1.2   | 1.0  | 1.0   | 1.0   | 1.3  | 1.3   | 1.6  | 1.2  | 1.5  | 1.3   | 0.8   | 1.0   |
| Vwa2   | 0.0   | 0.0  | 0.0   | 0.0   | 0.0  | 0.0   | 0.0  | 0.0  | 0.0  | 0.0   | 0.0   | 0.0   |
| Vwa3a  | 0.0   | 0.0  | 0.1   | 0.0   | 0.0  | 0.0   | 0.0  | 0.0  | 0.0  | 0.0   | 0.0   | 0.0   |
| Vwa5a  | 41.1  | 36.3 | 36.3  | 44.5  | 41.7 | 41.7  | 32.1 | 38.3 | 33.9 | 37.4  | 38.3  | 38.1  |
| Vwa5b2 | 0.0   | 0.0  | 0.0   | 0.0   | 0.0  | 0.0   | 0.0  | 0.0  | 0.0  | 0.0   | 0.0   | 0.0   |
| Vwa7   | 0.2   | 0.1  | 0.1   | 0.0   | 0.1  | 0.1   | 0.1  | 0.0  | 0.0  | 0.2   | 0.0   | 0.1   |
| Vwa8   | 12.8  | 9.8  | 9.1   | 12.3  | 10.1 | 11.9  | 8.3  | 10.3 | 7.5  | 9.7   | 9.2   | 9.2   |
| Vwa9   | 7.3   | 7.7  | 8.6   | 7.3   | 8.3  | 7.5   | 8.5  | 9.5  | 8.4  | 8.2   | 8.6   | 8.0   |
| Vwce   | 0.0   | 0.0  | 0.1   | 0.0   | 0.0  | 0.0   | 0.0  | 0.0  | 0.0  | 0.0   | 0.0   | 0.0   |
| Vwf    | 0.1   | 0.0  | 0.1   | 0.3   | 0.4  | 0.0   | 0.1  | 0.1  | 0.0  | 0.1   | 0.0   | 0.0   |
| Wac    | 14.5  | 15.2 | 18.1  | 16.3  | 13.6 | 14.8  | 16.8 | 16.0 | 14.7 | 14.7  | 17.9  | 17.4  |
| Wapal  | 22.3  | 22.0 | 23.3  | 22.1  | 22.2 | 19.1  | 20.0 | 21.0 | 19.5 | 20.4  | 23.8  | 22.8  |
| Wars   | 23.7  | 22.7 | 14.6  | 28.4  | 18.2 | 25.0  | 22.8 | 23.5 | 22.0 | 16.4  | 21.5  | 16.4  |
| Wars2  | 1.4   | 1.2  | 1.3   | 1.1   | 1.2  | 1.3   | 1.0  | 1.3  | 1.1  | 1.5   | 1.6   | 1.2   |
| Was    | 0.3   | 0.0  | 0.0   | 3.5   | 4.6  | 0.0   | 0.7  | 0.1  | 0.1  | 0.3   | 0.1   | 0.4   |
| Wasf1  | 0.1   | 0.3  | 0.4   | 0.2   | 0.1  | 0.3   | 0.3  | 0.4  | 0.3  | 0.5   | 0.3   | 0.4   |
| Wasf2  | 10.1  | 13.1 | 13.5  | 12.5  | 12.7 | 10.2  | 14.2 | 15.3 | 13.3 | 10.0  | 12.3  | 11.3  |
| Wasf3  | 2.4   | 2.6  | 2.1   | 3.7   | 1.8  | 4.3   | 2.6  | 1.4  | 1.5  | 1.1   | 1.6   | 1.5   |
| Wash   | 9.0   | 8.5  | 6.8   | 9.9   | 8.0  | 9.1   | 7.3  | 8.0  | 8.4  | 8.3   | 7.9   | 8.3   |
| Wasl   | 3.1   | 4.8  | 5.0   | 4.0   | 3.5  | 4.1   | 4.0  | 3.5  | 3.6  | 4.1   | 4.0   | 4.5   |
| Wbp1   | 27.1  | 29.9 | 27.8  | 26.9  | 25.6 | 33.2  | 27.0 | 27.1 | 28.6 | 27.8  | 26.8  | 23.8  |
| Wbp11  | 8.0   | 9.2  | 10.8  | 10.0  | 10.0 | 9.8   | 11.3 | 10.2 | 8.8  | 8.8   | 10.3  | 9.3   |
| Wbp1l  | 22.7  | 24.1 | 24.2  | 19.9  | 22.0 | 21.3  | 23.5 | 23.9 | 23.6 | 22.4  | 21.4  | 22.1  |
| Wbp2   | 24.5  | 22.9 | 19.9  | 28.0  | 23.5 | 30.4  | 23.3 | 21.7 | 19.4 | 22.1  | 23.1  | 20.4  |
| Wbp4   | 19.6  | 19.2 | 17.6  | 19.6  | 15.0 | 20.7  | 16.8 | 16.4 | 16.5 | 16.8  | 20.1  | 18.9  |
| Wbp5   | 110.8 | 81.9 | 105.8 | 131.3 | 92.2 | 113.9 | 98.7 | 88.9 | 78.2 | 118.6 | 137.9 | 135.4 |
| Wbp7   | 0.9   | 1.2  | 1.2   | 0.8   | 1.2  | 1.0   | 1.4  | 1.2  | 1.4  | 1.0   | 1.0   | 1.0   |

Online Table 1

|         |       |       |      |       |       |      |       |       |       |       |       |       |
|---------|-------|-------|------|-------|-------|------|-------|-------|-------|-------|-------|-------|
| Wbscr16 | 4.0   | 4.0   | 3.2  | 3.7   | 4.0   | 4.2  | 3.7   | 4.5   | 4.1   | 4.0   | 3.8   | 4.1   |
| Wbscr17 | 0.4   | 0.4   | 0.6  | 0.8   | 0.7   | 0.7  | 1.0   | 1.0   | 1.0   | 0.9   | 0.7   | 0.7   |
| Wbscr22 | 12.7  | 12.4  | 11.9 | 15.3  | 13.2  | 15.8 | 13.1  | 14.6  | 13.3  | 12.7  | 12.8  | 13.3  |
| Wbscr27 | 3.4   | 3.4   | 3.8  | 4.1   | 2.6   | 5.0  | 2.8   | 3.6   | 2.5   | 2.2   | 3.2   | 2.8   |
| Wdfy1   | 5.6   | 4.5   | 3.8  | 4.5   | 4.9   | 5.2  | 5.0   | 3.6   | 4.3   | 5.0   | 4.7   | 4.5   |
| Wdfy2   | 5.3   | 7.1   | 7.0  | 5.6   | 7.3   | 5.1  | 5.7   | 6.8   | 5.2   | 5.4   | 5.2   | 5.0   |
| Wdfy3   | 5.2   | 6.3   | 6.2  | 5.6   | 6.6   | 5.6  | 7.1   | 5.5   | 5.6   | 5.3   | 5.5   | 5.2   |
| Wdfy4   | 0.2   | 0.0   | 0.0  | 1.4   | 2.2   | 0.0  | 0.2   | 0.0   | 0.1   | 0.1   | 0.1   | 0.1   |
| Wdhd1   | 1.1   | 1.7   | 1.9  | 0.7   | 1.7   | 0.6  | 2.3   | 1.5   | 1.7   | 1.1   | 1.6   | 0.9   |
| Wdpcp   | 4.9   | 4.1   | 4.6  | 4.7   | 3.7   | 5.4  | 3.2   | 4.2   | 3.3   | 3.8   | 3.6   | 3.5   |
| Wdr1    | 127.6 | 102.0 | 83.0 | 142.6 | 142.7 | 98.2 | 134.4 | 101.7 | 118.0 | 116.1 | 143.3 | 118.8 |
| Wdr11   | 8.3   | 8.3   | 8.4  | 8.7   | 8.9   | 8.6  | 8.4   | 8.8   | 8.4   | 7.7   | 7.7   | 7.8   |
| Wdr12   | 9.4   | 6.6   | 5.3  | 9.5   | 7.4   | 8.9  | 5.9   | 5.0   | 5.8   | 7.4   | 6.9   | 6.7   |
| Wdr13   | 9.3   | 8.3   | 7.8  | 9.9   | 8.3   | 9.3  | 10.0  | 8.0   | 9.5   | 8.9   | 10.6  | 8.8   |
| Wdr16   | 0.0   | 0.0   | 0.1  | 0.0   | 0.0   | 0.0  | 0.0   | 0.0   | 0.0   | 0.0   | 0.0   | 0.0   |
| Wdr17   | 0.3   | 0.1   | 0.1  | 0.1   | 0.0   | 0.3  | 0.0   | 0.0   | 0.0   | 0.0   | 0.0   | 0.0   |
| Wdr18   | 11.5  | 10.7  | 7.3  | 11.9  | 10.9  | 11.4 | 10.0  | 9.2   | 9.7   | 10.4  | 9.7   | 8.9   |
| Wdr19   | 5.0   | 5.5   | 5.7  | 4.6   | 4.0   | 6.9  | 4.1   | 5.1   | 4.2   | 5.0   | 5.0   | 5.2   |
| Wdr20a  | 5.4   | 5.0   | 5.8  | 6.0   | 4.9   | 5.7  | 5.7   | 6.1   | 4.8   | 5.1   | 6.6   | 6.3   |
| Wdr20b  | 0.6   | 0.5   | 0.5  | 0.8   | 0.5   | 0.6  | 0.5   | 0.5   | 0.6   | 0.5   | 0.4   | 0.5   |
| Wdr24   | 6.4   | 6.4   | 5.7  | 7.4   | 5.6   | 7.7  | 6.0   | 6.9   | 6.3   | 6.0   | 5.6   | 6.1   |
| Wdr25   | 1.3   | 1.5   | 1.2  | 1.1   | 1.3   | 1.4  | 1.1   | 1.0   | 1.1   | 1.2   | 1.1   | 1.4   |
| Wdr26   | 19.4  | 21.4  | 20.3 | 18.6  | 21.1  | 19.1 | 18.1  | 17.3  | 19.0  | 19.8  | 18.6  | 19.7  |
| Wdr27   | 0.0   | 0.0   | 0.0  | 0.1   | 0.0   | 0.1  | 0.0   | 0.0   | 0.0   | 0.0   | 0.0   | 0.0   |
| Wdr3    | 9.5   | 8.7   | 7.6  | 9.2   | 10.2  | 9.3  | 9.3   | 8.5   | 8.7   | 10.2  | 9.9   | 8.5   |
| Wdr31   | 0.2   | 0.2   | 0.4  | 0.1   | 0.2   | 0.6  | 0.2   | 0.2   | 0.2   | 0.2   | 0.1   | 0.3   |
| Wdr33   | 16.0  | 16.0  | 15.2 | 14.0  | 13.5  | 15.1 | 13.3  | 14.3  | 14.4  | 12.7  | 15.1  | 17.9  |
| Wdr34   | 4.0   | 3.0   | 3.6  | 3.2   | 3.0   | 4.2  | 4.2   | 3.2   | 3.0   | 3.6   | 3.8   | 3.8   |
| Wdr35   | 13.5  | 11.5  | 11.9 | 8.9   | 9.9   | 10.8 | 7.7   | 7.9   | 7.1   | 11.8  | 10.4  | 9.5   |
| Wdr36   | 19.5  | 19.4  | 14.6 | 18.8  | 17.3  | 18.7 | 17.2  | 17.2  | 16.5  | 18.9  | 19.0  | 15.0  |
| Wdr37   | 4.6   | 5.2   | 5.2  | 4.8   | 4.9   | 3.8  | 4.7   | 4.8   | 4.5   | 5.5   | 4.7   | 4.5   |
| Wdr38   | 0.2   | 0.0   | 0.0  | 0.2   | 0.1   | 0.0  | 0.2   | 0.1   | 0.2   | 0.0   | 0.1   | 0.1   |
| Wdr4    | 3.0   | 2.3   | 1.9  | 2.1   | 2.8   | 2.5  | 2.7   | 2.3   | 2.5   | 2.6   | 2.3   | 1.9   |
| Wdr41   | 7.5   | 6.7   | 5.8  | 8.0   | 7.5   | 7.0  | 6.9   | 7.4   | 6.4   | 7.4   | 7.1   | 6.4   |
| Wdr43   | 15.9  | 13.2  | 13.6 | 18.0  | 14.3  | 13.9 | 16.4  | 16.0  | 12.9  | 15.1  | 18.2  | 17.0  |
| Wdr44   | 2.9   | 3.0   | 2.8  | 3.0   | 2.9   | 2.3  | 2.9   | 2.7   | 3.4   | 2.9   | 3.8   | 4.2   |
| Wdr45   | 14.9  | 11.0  | 10.5 | 13.3  | 11.7  | 15.3 | 9.5   | 12.5  | 10.6  | 14.6  | 11.6  | 12.1  |
| Wdr45b  | 20.2  | 21.5  | 19.2 | 18.9  | 20.0  | 18.4 | 20.5  | 22.4  | 19.5  | 19.7  | 19.9  | 19.1  |
| Wdr46   | 8.9   | 8.0   | 6.6  | 9.3   | 8.7   | 9.7  | 8.2   | 8.0   | 6.7   | 7.2   | 7.5   | 7.5   |
| Wdr47   | 4.5   | 4.6   | 3.4  | 4.6   | 4.3   | 4.4  | 3.8   | 3.1   | 4.6   | 4.4   | 5.4   | 4.3   |
| Wdr48   | 16.2  | 15.8  | 14.8 | 18.5  | 15.3  | 17.4 | 15.3  | 15.4  | 14.4  | 15.6  | 18.1  | 16.6  |
| Wdr5    | 10.2  | 9.9   | 8.9  | 9.8   | 8.9   | 8.2  | 9.3   | 9.5   | 9.5   | 9.0   | 9.3   | 8.9   |
| Wdr52   | 0.0   | 0.0   | 0.0  | 0.0   | 0.0   | 0.0  | 0.0   | 0.0   | 0.0   | 0.0   | 0.0   | 0.0   |
| Wdr53   | 7.3   | 8.1   | 7.1  | 7.2   | 7.0   | 5.5  | 5.1   | 5.8   | 5.8   | 6.6   | 7.1   | 6.4   |
| Wdr54   | 0.8   | 0.7   | 1.3  | 0.4   | 0.6   | 1.2  | 0.5   | 0.7   | 1.1   | 0.8   | 0.7   | 0.6   |
| Wdr55   | 8.9   | 10.4  | 8.1  | 10.3  | 9.6   | 8.4  | 9.1   | 10.4  | 8.1   | 9.5   | 9.8   | 9.0   |
| Wdr59   | 2.1   | 2.6   | 2.2  | 2.0   | 2.3   | 2.0  | 2.5   | 2.5   | 2.3   | 2.2   | 2.1   | 2.3   |
| Wdr5b   | 1.8   | 2.7   | 2.9  | 1.7   | 2.5   | 2.3  | 2.1   | 2.8   | 2.5   | 2.1   | 1.7   | 3.0   |
| Wdr6    | 18.8  | 19.3  | 19.5 | 13.7  | 16.9  | 15.6 | 18.3  | 19.3  | 21.1  | 20.6  | 16.1  | 16.9  |
| Wdr60   | 5.7   | 5.9   | 6.6  | 6.9   | 5.0   | 6.5  | 6.9   | 5.7   | 4.7   | 5.3   | 6.3   | 6.8   |
| Wdr61   | 52.8  | 48.4  | 41.7 | 41.5  | 42.5  | 47.3 | 42.0  | 37.3  | 39.9  | 43.4  | 41.2  | 44.6  |
| Wdr62   | 0.8   | 0.7   | 0.9  | 0.8   | 0.9   | 0.2  | 1.3   | 0.8   | 0.9   | 0.4   | 0.6   | 0.5   |
| Wdr63   | 0.1   | 0.0   | 0.0  | 0.0   | 0.0   | 0.0  | 0.0   | 0.0   | 0.0   | 0.0   | 0.1   | 0.1   |
| Wdr65   | 0.1   | 0.1   | 0.1  | 0.2   | 0.0   | 0.1  | 0.0   | 0.0   | 0.0   | 0.0   | 0.0   | 0.0   |
| Wdr67   | 7.2   | 7.5   | 8.8  | 5.7   | 6.7   | 7.9  | 7.4   | 6.3   | 6.7   | 5.4   | 7.3   | 5.7   |
| Wdr69   | 0.1   | 0.3   | 0.1  | 0.1   | 0.1   | 0.0  | 0.0   | 0.1   | 0.1   | 0.0   | 0.0   | 0.1   |
| Wdr7    | 10.3  | 10.0  | 9.1  | 11.7  | 9.0   | 11.4 | 8.1   | 7.7   | 7.6   | 8.4   | 8.8   | 9.6   |

Online Table 1



|         |       |       |       |       |       |       |       |        |       |       |       |       |
|---------|-------|-------|-------|-------|-------|-------|-------|--------|-------|-------|-------|-------|
| Wdr70   | 5.9   | 6.3   | 6.9   | 7.3   | 5.7   | 7.1   | 6.7   | 5.5    | 4.8   | 6.4   | 5.1   | 5.4   |
| Wdr72   | 0.0   | 0.0   | 0.0   | 0.0   | 0.0   | 0.0   | 0.0   | 0.0    | 0.0   | 0.1   | 0.1   | 0.1   |
| Wdr73   | 4.3   | 3.7   | 3.6   | 4.3   | 3.4   | 4.4   | 3.0   | 3.8    | 3.6   | 3.9   | 3.2   | 3.7   |
| Wdr74   | 16.2  | 14.2  | 11.4  | 16.1  | 12.7  | 14.4  | 15.3  | 12.1   | 11.7  | 12.6  | 16.0  | 13.0  |
| Wdr75   | 16.1  | 14.9  | 12.4  | 15.1  | 15.2  | 14.2  | 15.2  | 15.1   | 13.9  | 16.6  | 15.8  | 14.8  |
| Wdr76   | 0.7   | 1.0   | 1.4   | 0.6   | 1.1   | 0.9   | 1.5   | 0.9    | 0.9   | 0.7   | 0.9   | 0.7   |
| Wdr77   | 8.6   | 6.4   | 5.6   | 8.0   | 8.3   | 7.2   | 7.3   | 7.8    | 7.3   | 8.5   | 8.5   | 6.6   |
| Wdr78   | 2.2   | 2.2   | 2.2   | 1.9   | 1.7   | 2.7   | 1.4   | 2.0    | 1.3   | 2.0   | 2.2   | 1.8   |
| Wdr8    | 9.3   | 7.9   | 5.8   | 6.8   | 7.4   | 8.5   | 6.0   | 6.3    | 7.3   | 6.9   | 6.6   | 5.6   |
| Wdr81   | 7.2   | 6.7   | 5.6   | 8.2   | 9.0   | 8.1   | 7.6   | 5.7    | 7.0   | 7.5   | 6.1   | 6.1   |
| Wdr82   | 15.0  | 16.8  | 15.8  | 14.4  | 15.0  | 15.8  | 15.1  | 17.0   | 18.1  | 15.6  | 16.8  | 16.0  |
| Wdr83   | 8.3   | 9.0   | 7.1   | 8.9   | 7.3   | 9.6   | 7.7   | 7.7    | 8.5   | 7.2   | 7.1   | 7.2   |
| Wdr85   | 2.5   | 2.7   | 2.8   | 3.3   | 2.2   | 3.2   | 2.4   | 2.7    | 2.6   | 2.8   | 3.0   | 3.2   |
| Wdr89   | 1.7   | 1.4   | 1.1   | 1.3   | 1.1   | 1.0   | 1.2   | 1.6    | 1.1   | 1.0   | 1.4   | 1.3   |
| Wdr90   | 0.5   | 0.7   | 1.0   | 0.3   | 0.7   | 0.5   | 1.0   | 0.6    | 0.9   | 0.4   | 0.6   | 0.5   |
| Wdr91   | 5.0   | 4.3   | 4.9   | 7.1   | 6.9   | 4.6   | 5.2   | 4.7    | 3.8   | 5.8   | 4.8   | 4.1   |
| Wdr92   | 9.2   | 8.7   | 8.0   | 9.3   | 9.2   | 8.3   | 9.1   | 7.3    | 7.6   | 15.2  | 10.2  | 11.5  |
| Wdr93   | 0.3   | 0.3   | 0.3   | 0.2   | 0.2   | 0.5   | 0.3   | 0.2    | 0.1   | 0.2   | 0.1   | 0.1   |
| Wdr95   | 0.1   | 0.1   | 0.1   | 0.1   | 0.0   | 0.0   | 0.0   | 0.1    | 0.1   | 0.0   | 0.0   | 0.0   |
| Wdr96   | 0.3   | 0.3   | 0.3   | 0.5   | 0.3   | 0.3   | 0.4   | 0.4    | 0.3   | 0.2   | 0.4   | 0.4   |
| Wdsub1  | 6.7   | 6.8   | 7.5   | 6.6   | 5.7   | 6.5   | 5.6   | 7.7    | 7.1   | 6.7   | 7.3   | 7.6   |
| Wdtc1   | 5.6   | 5.3   | 5.2   | 4.8   | 4.4   | 5.6   | 4.6   | 5.4    | 5.0   | 5.6   | 5.2   | 4.1   |
| Wdyhv1  | 7.2   | 5.9   | 5.9   | 6.6   | 6.6   | 6.3   | 5.2   | 5.6    | 5.0   | 4.4   | 4.7   | 4.9   |
| Wee1    | 3.0   | 4.0   | 4.7   | 2.7   | 3.5   | 4.2   | 4.2   | 2.8    | 3.3   | 3.0   | 3.5   | 2.9   |
| Wfdc1   | 0.6   | 0.1   | 0.3   | 0.5   | 0.0   | 0.5   | 0.1   | 0.1    | 0.2   | 0.2   | 0.1   | 0.3   |
| Wfdc12  | 0.0   | 0.1   | 0.4   | 0.0   | 0.1   | 0.0   | 0.1   | 0.4    | 0.1   | 0.1   | 0.2   | 0.2   |
| Wfdc15a | 0.2   | 0.3   | 0.0   | 0.0   | 0.4   | 0.0   | 0.0   | 0.4    | 0.1   | 0.0   | 0.0   | 0.1   |
| Wfdc17  | 7.4   | 0.3   | 1.0   | 42.0  | 36.3  | 0.0   | 8.2   | 2.9    | 0.9   | 2.0   | 1.9   | 2.5   |
| Wfdc18  | 0.1   | 0.2   | 0.0   | 0.0   | 0.3   | 0.1   | 0.0   | 0.2    | 0.2   | 0.4   | 0.1   | 0.1   |
| Wfdc3   | 0.3   | 0.1   | 0.0   | 0.1   | 0.1   | 0.1   | 0.0   | 0.0    | 0.0   | 0.2   | 0.1   | 0.1   |
| Wfdc5   | 0.0   | 0.1   | 0.0   | 0.0   | 0.0   | 0.0   | 0.0   | 0.0    | 0.0   | 0.0   | 0.0   | 0.1   |
| Wfdc6a  | 0.1   | 0.1   | 0.1   | 0.2   | 0.1   | 0.1   | 0.0   | 0.0    | 0.0   | 0.0   | 0.0   | 0.0   |
| Wfikkn1 | 0.1   | 0.1   | 0.2   | 0.1   | 0.1   | 0.2   | 0.3   | 0.2    | 0.1   | 0.3   | 0.2   | 0.1   |
| Wfikkn2 | 0.3   | 0.3   | 0.5   | 0.5   | 0.2   | 0.3   | 0.3   | 0.5    | 0.3   | 0.3   | 0.1   | 0.3   |
| Wfs1    | 8.6   | 7.8   | 6.9   | 9.9   | 7.3   | 8.3   | 9.4   | 8.4    | 7.4   | 6.8   | 8.2   | 7.0   |
| Whamm   | 4.3   | 4.6   | 4.8   | 6.2   | 4.2   | 5.2   | 4.1   | 3.5    | 4.1   | 4.6   | 4.4   | 4.4   |
| Whrn    | 0.5   | 0.6   | 0.4   | 1.5   | 0.5   | 0.6   | 0.6   | 0.7    | 0.8   | 1.4   | 0.3   | 0.6   |
| Whsc1   | 6.1   | 6.3   | 7.1   | 5.0   | 6.9   | 5.5   | 6.9   | 4.9    | 6.3   | 6.2   | 7.1   | 5.9   |
| Whsc111 | 8.7   | 11.4  | 11.8  | 10.1  | 9.5   | 9.8   | 11.8  | 9.7    | 9.0   | 10.0  | 11.0  | 11.2  |
| Wibg    | 7.8   | 7.7   | 8.5   | 11.7  | 6.2   | 6.9   | 8.1   | 9.0    | 6.6   | 6.9   | 7.3   | 7.8   |
| Wif1    | 0.1   | 0.1   | 0.2   | 0.0   | 0.0   | 0.0   | 0.0   | 0.0    | 0.0   | 0.0   | 0.0   | 0.1   |
| Wipf1   | 5.4   | 5.6   | 5.0   | 8.0   | 7.2   | 5.5   | 5.4   | 3.6    | 4.6   | 4.3   | 4.2   | 4.4   |
| Wipf2   | 0.8   | 1.0   | 1.0   | 1.2   | 0.8   | 0.9   | 1.1   | 1.0    | 0.8   | 0.9   | 0.9   | 0.8   |
| Wipf3   | 0.0   | 0.0   | 0.0   | 0.0   | 0.0   | 0.0   | 0.1   | 0.0    | 0.0   | 0.0   | 0.0   | 0.0   |
| Wipi1   | 37.9  | 47.1  | 50.7  | 34.6  | 44.0  | 36.2  | 57.6  | 57.4   | 52.9  | 42.6  | 51.6  | 53.6  |
| Wipi2   | 28.2  | 24.2  | 21.9  | 27.6  | 22.8  | 28.5  | 24.0  | 25.2   | 23.7  | 24.3  | 23.7  | 23.6  |
| Wisp1   | 91.2  | 74.1  | 55.7  | 110.7 | 113.5 | 88.4  | 139.0 | 132.2  | 169.9 | 109.8 | 137.2 | 134.0 |
| Wisp2   | 889.6 | 848.1 | 849.2 | 916.1 | 791.4 | 853.7 | 954.4 | 1006.2 | 992.8 | 674.4 | 749.7 | 835.5 |
| Wiz     | 1.2   | 1.7   | 1.7   | 1.7   | 1.4   | 1.7   | 1.4   | 1.7    | 1.6   | 1.4   | 1.6   | 1.4   |
| Wls     | 219.2 | 174.5 | 132.7 | 214.8 | 146.1 | 209.2 | 152.3 | 140.7  | 182.5 | 197.7 | 188.3 | 197.3 |
| Wnk1    | 19.9  | 22.8  | 18.9  | 22.3  | 22.0  | 21.7  | 23.8  | 15.2   | 17.4  | 15.9  | 20.3  | 16.5  |
| Wnk2    | 0.0   | 0.0   | 0.0   | 0.0   | 0.0   | 0.1   | 0.0   | 0.0    | 0.0   | 0.0   | 0.0   | 0.0   |
| Wnk3    | 0.4   | 0.4   | 0.3   | 0.3   | 0.4   | 0.4   | 0.4   | 0.4    | 0.4   | 0.4   | 0.6   | 0.4   |
| Wnk4    | 0.0   | 0.0   | 0.1   | 0.1   | 0.1   | 0.1   | 0.1   | 0.1    | 0.1   | 0.1   | 0.1   | 0.1   |
| Wnt10a  | 0.2   | 0.0   | 0.0   | 0.1   | 0.0   | 0.0   | 0.0   | 0.0    | 0.0   | 0.1   | 0.0   | 0.0   |
| Wnt10b  | 0.1   | 0.1   | 0.0   | 0.1   | 0.1   | 0.0   | 0.0   | 0.0    | 0.0   | 0.0   | 0.0   | 0.0   |
| Wnt11   | 0.2   | 0.4   | 0.4   | 0.1   | 0.3   | 0.2   | 0.3   | 0.4    | 0.3   | 1.1   | 0.7   | 0.4   |

Online Table 1

|         |      |      |      |      |      |      |      |      |      |      |      |      |
|---------|------|------|------|------|------|------|------|------|------|------|------|------|
| Wnt16   | 0.2  | 0.1  | 0.2  | 0.1  | 0.1  | 0.0  | 0.3  | 0.5  | 0.2  | 0.2  | 0.6  | 0.5  |
| Wnt2    | 0.1  | 0.0  | 0.1  | 0.2  | 0.0  | 0.1  | 0.3  | 0.0  | 0.0  | 0.6  | 0.4  | 0.3  |
| Wnt2b   | 0.2  | 0.3  | 0.1  | 0.2  | 0.2  | 0.2  | 0.4  | 0.1  | 0.2  | 0.9  | 0.1  | 0.4  |
| Wnt3    | 0.0  | 0.0  | 0.0  | 0.1  | 0.0  | 0.0  | 0.0  | 0.0  | 0.0  | 0.0  | 0.0  | 0.0  |
| Wnt4    | 0.2  | 0.4  | 0.3  | 0.1  | 0.3  | 0.2  | 0.2  | 0.4  | 0.5  | 2.2  | 1.1  | 1.0  |
| Wnt5a   | 3.8  | 2.8  | 4.9  | 4.1  | 4.1  | 3.3  | 4.2  | 5.4  | 4.2  | 3.5  | 3.2  | 3.7  |
| Wnt5b   | 0.5  | 0.6  | 0.9  | 0.7  | 0.6  | 0.5  | 0.8  | 0.7  | 0.4  | 0.9  | 0.7  | 0.8  |
| Wnt6    | 0.0  | 0.0  | 0.0  | 0.0  | 0.1  | 0.0  | 0.0  | 0.0  | 0.0  | 0.0  | 0.0  | 0.0  |
| Wnt7b   | 0.1  | 0.0  | 0.0  | 0.0  | 0.0  | 0.0  | 0.0  | 0.0  | 0.0  | 0.0  | 0.0  | 0.0  |
| Wnt8a   | 0.0  | 0.0  | 0.0  | 0.0  | 0.0  | 0.0  | 0.1  | 0.0  | 0.0  | 0.0  | 0.0  | 0.0  |
| Wnt8b   | 0.0  | 0.0  | 0.0  | 0.0  | 0.0  | 0.1  | 0.0  | 0.0  | 0.0  | 0.0  | 0.0  | 0.0  |
| Wnt9a   | 6.1  | 4.4  | 3.3  | 3.1  | 2.7  | 3.3  | 3.3  | 3.6  | 2.9  | 5.0  | 4.4  | 3.7  |
| Wrap53  | 3.2  | 3.6  | 4.0  | 3.6  | 3.7  | 3.3  | 3.4  | 3.3  | 3.1  | 2.9  | 2.7  | 2.9  |
| Wrb     | 7.1  | 6.4  | 4.9  | 8.2  | 6.2  | 8.1  | 7.0  | 6.2  | 6.9  | 8.4  | 8.2  | 7.3  |
| Wrn     | 5.6  | 6.0  | 5.9  | 4.9  | 5.0  | 5.8  | 5.0  | 4.9  | 4.8  | 5.0  | 5.5  | 5.4  |
| Wrnip1  | 11.8 | 12.0 | 10.5 | 7.8  | 9.5  | 10.7 | 11.1 | 10.2 | 12.0 | 12.4 | 11.6 | 12.5 |
| Wsb1    | 24.0 | 20.3 | 19.1 | 20.9 | 26.6 | 17.9 | 22.4 | 18.7 | 23.4 | 26.2 | 24.6 | 22.6 |
| Wsb2    | 87.1 | 70.5 | 51.6 | 85.6 | 69.0 | 75.6 | 78.3 | 59.9 | 68.2 | 75.4 | 77.7 | 67.5 |
| Wscd1   | 0.1  | 0.0  | 0.1  | 0.0  | 0.0  | 0.0  | 0.1  | 0.2  | 0.1  | 0.0  | 0.0  | 0.0  |
| Wscd2   | 0.7  | 0.4  | 0.6  | 0.5  | 0.4  | 0.4  | 0.9  | 1.4  | 0.7  | 0.3  | 0.5  | 0.7  |
| Wt1     | 0.2  | 0.0  | 0.0  | 0.1  | 0.1  | 0.0  | 0.1  | 0.3  | 0.7  | 9.0  | 4.1  | 2.6  |
| Wtap    | 21.3 | 19.7 | 21.1 | 20.4 | 22.7 | 17.5 | 21.9 | 24.1 | 23.9 | 24.0 | 26.7 | 24.3 |
| Wtip    | 7.2  | 7.0  | 6.0  | 6.6  | 6.2  | 7.0  | 6.7  | 8.6  | 9.6  | 10.3 | 7.5  | 8.0  |
| Wwc1    | 7.6  | 6.4  | 4.4  | 5.2  | 3.2  | 5.2  | 4.2  | 2.8  | 4.0  | 3.7  | 4.8  | 3.2  |
| Wwc2    | 37.3 | 34.9 | 27.6 | 36.8 | 30.5 | 36.0 | 37.1 | 26.7 | 38.0 | 39.1 | 37.8 | 36.2 |
| Wwox    | 4.3  | 4.0  | 4.0  | 3.3  | 3.2  | 5.3  | 2.8  | 3.4  | 2.8  | 3.6  | 3.6  | 3.3  |
| Wwp1    | 28.4 | 24.9 | 22.8 | 32.1 | 24.0 | 28.1 | 21.9 | 17.6 | 19.9 | 18.9 | 27.1 | 23.6 |
| Wwp2    | 8.3  | 6.0  | 5.4  | 10.6 | 8.2  | 9.0  | 8.0  | 7.4  | 6.9  | 6.8  | 7.9  | 7.7  |
| Wwtr1   | 52.7 | 47.4 | 47.8 | 61.8 | 46.2 | 50.1 | 51.8 | 38.6 | 41.3 | 50.7 | 58.2 | 54.0 |
| Xab2    | 10.9 | 13.3 | 13.8 | 11.4 | 11.8 | 12.6 | 13.5 | 13.1 | 11.9 | 11.4 | 10.9 | 12.9 |
| Xaf1    | 4.8  | 2.7  | 3.0  | 5.7  | 3.0  | 3.3  | 2.4  | 2.6  | 2.4  | 1.9  | 2.4  | 4.7  |
| Xbp1    | 48.1 | 45.9 | 40.6 | 47.5 | 45.7 | 39.7 | 44.2 | 56.8 | 55.0 | 53.7 | 56.1 | 53.3 |
| Xcr1    | 0.1  | 0.0  | 0.0  | 0.1  | 0.1  | 0.0  | 0.0  | 0.1  | 0.0  | 0.1  | 0.0  | 0.0  |
| Xdh     | 33.7 | 26.7 | 34.7 | 35.2 | 27.5 | 30.6 | 16.4 | 25.4 | 16.7 | 33.1 | 19.3 | 30.2 |
| Xiap    | 6.1  | 7.1  | 8.4  | 6.4  | 6.5  | 6.5  | 5.7  | 7.0  | 7.2  | 6.6  | 7.4  | 8.3  |
| Xirp1   | 0.0  | 0.0  | 0.0  | 0.0  | 0.0  | 0.0  | 0.0  | 0.0  | 0.0  | 0.0  | 0.0  | 0.0  |
| Xirp2   | 0.0  | 0.0  | 0.0  | 0.0  | 0.0  | 0.0  | 0.0  | 0.0  | 0.0  | 0.0  | 0.0  | 0.0  |
| Xist    | 0.0  | 0.0  | 0.0  | 0.0  | 0.0  | 0.0  | 0.0  | 0.0  | 0.0  | 0.0  | 0.0  | 0.0  |
| Xk      | 0.4  | 0.2  | 0.3  | 0.3  | 0.3  | 0.5  | 0.3  | 0.3  | 0.3  | 0.5  | 0.3  | 0.3  |
| Xkr4    | 1.0  | 1.0  | 1.2  | 0.9  | 0.9  | 0.7  | 1.2  | 1.9  | 1.9  | 0.7  | 1.0  | 0.8  |
| Xkr5    | 0.1  | 0.3  | 0.6  | 0.1  | 0.3  | 0.0  | 0.6  | 0.4  | 0.4  | 0.1  | 0.3  | 0.2  |
| Xkr6    | 0.2  | 0.4  | 0.2  | 0.2  | 0.2  | 0.3  | 0.1  | 0.2  | 0.2  | 0.4  | 0.2  | 0.2  |
| Xkr8    | 3.8  | 3.3  | 2.7  | 3.7  | 3.1  | 4.1  | 3.2  | 2.4  | 2.1  | 3.2  | 2.9  | 3.3  |
| Xkrx    | 0.0  | 0.0  | 0.0  | 0.0  | 0.0  | 0.1  | 0.0  | 0.0  | 0.0  | 0.0  | 0.0  | 0.0  |
| Xlr     | 5.6  | 5.9  | 5.8  | 5.4  | 4.0  | 5.6  | 5.2  | 4.9  | 3.5  | 4.1  | 6.7  | 6.4  |
| Xlr3a   | 1.3  | 2.1  | 0.7  | 1.8  | 1.0  | 3.2  | 0.6  | 1.1  | 0.8  | 0.4  | 1.1  | 1.0  |
| Xlr3b   | 1.8  | 3.2  | 1.3  | 2.0  | 2.5  | 3.7  | 0.9  | 1.7  | 1.7  | 0.9  | 1.2  | 1.4  |
| Xlr3c   | 1.0  | 1.8  | 0.7  | 1.1  | 1.2  | 1.8  | 0.6  | 1.0  | 1.0  | 0.5  | 0.7  | 0.8  |
| Xlr4a   | 0.5  | 0.7  | 0.4  | 0.5  | 0.7  | 1.4  | 0.3  | 0.9  | 0.8  | 0.0  | 0.5  | 0.4  |
| Xlr4b   | 0.2  | 0.3  | 0.2  | 0.2  | 0.4  | 0.8  | 0.2  | 0.4  | 0.3  | 0.1  | 0.3  | 0.2  |
| Xlr4c   | 0.1  | 0.3  | 0.1  | 0.2  | 0.2  | 0.2  | 0.1  | 0.2  | 0.1  | 0.0  | 0.1  | 0.2  |
| Xpa     | 20.7 | 15.3 | 17.9 | 17.1 | 11.5 | 13.8 | 13.5 | 15.8 | 12.4 | 14.3 | 18.6 | 20.5 |
| Xpc     | 10.2 | 8.4  | 8.4  | 15.6 | 8.4  | 12.5 | 7.5  | 6.2  | 5.9  | 7.9  | 7.9  | 8.1  |
| Xpnpep1 | 33.9 | 31.4 | 28.9 | 32.0 | 31.9 | 29.1 | 35.1 | 33.7 | 30.0 | 31.4 | 33.7 | 31.5 |
| Xpnpep2 | 0.1  | 0.0  | 0.0  | 0.0  | 0.0  | 0.0  | 0.0  | 0.0  | 0.0  | 0.0  | 0.1  | 0.0  |
| Xpnpep3 | 3.0  | 2.9  | 2.8  | 3.3  | 2.7  | 3.6  | 2.7  | 3.0  | 2.2  | 2.7  | 2.7  | 2.9  |
| Xpo1    | 15.6 | 24.0 | 25.1 | 18.4 | 20.3 | 23.9 | 17.3 | 18.1 | 19.0 | 18.9 | 20.8 | 19.3 |

Online Table 1

|          |       |       |       |       |       |       |       |       |       |       |       |       |
|----------|-------|-------|-------|-------|-------|-------|-------|-------|-------|-------|-------|-------|
| Xpo4     | 3.8   | 4.5   | 4.6   | 3.3   | 4.5   | 3.3   | 3.8   | 4.1   | 4.3   | 3.5   | 4.3   | 4.2   |
| Xpo5     | 19.7  | 17.8  | 18.0  | 18.3  | 18.3  | 17.7  | 18.7  | 18.1  | 16.1  | 17.0  | 18.2  | 16.5  |
| Xpo6     | 10.1  | 10.5  | 9.8   | 9.5   | 10.3  | 10.2  | 10.7  | 9.8   | 10.0  | 8.0   | 8.9   | 7.8   |
| Xpo7     | 3.4   | 3.2   | 3.0   | 3.5   | 2.9   | 3.6   | 2.9   | 3.0   | 2.9   | 3.1   | 3.1   | 3.2   |
| Xpot     | 22.4  | 18.4  | 17.0  | 24.6  | 19.8  | 23.2  | 19.1  | 25.7  | 22.6  | 21.2  | 24.6  | 21.0  |
| Xpr1     | 5.4   | 5.2   | 4.8   | 5.7   | 5.7   | 6.2   | 5.3   | 5.2   | 4.6   | 4.8   | 5.3   | 4.9   |
| Xrcc1    | 7.6   | 8.3   | 10.2  | 7.0   | 8.8   | 7.8   | 8.8   | 7.8   | 7.7   | 7.9   | 8.2   | 7.2   |
| Xrcc2    | 0.9   | 1.4   | 1.2   | 0.8   | 1.6   | 1.1   | 1.4   | 1.0   | 1.3   | 0.9   | 1.2   | 0.8   |
| Xrcc3    | 1.2   | 1.5   | 1.0   | 1.3   | 1.0   | 1.0   | 1.2   | 1.6   | 1.3   | 1.3   | 1.1   | 0.8   |
| Xrcc4    | 6.4   | 5.8   | 5.9   | 7.0   | 6.3   | 6.1   | 7.2   | 7.2   | 6.4   | 7.4   | 8.3   | 8.5   |
| Xrcc5    | 13.4  | 10.8  | 9.3   | 11.9  | 8.6   | 12.6  | 7.6   | 9.0   | 8.5   | 10.6  | 10.1  | 10.0  |
| Xrcc6    | 10.5  | 10.4  | 11.1  | 11.0  | 10.2  | 10.6  | 9.9   | 9.5   | 8.4   | 9.8   | 10.1  | 9.7   |
| Xrcc6bp1 | 2.8   | 2.8   | 3.1   | 2.8   | 3.7   | 3.5   | 3.2   | 2.7   | 2.6   | 2.8   | 2.5   | 1.7   |
| Xrn1     | 3.5   | 4.0   | 4.0   | 3.0   | 3.8   | 3.6   | 3.7   | 3.6   | 2.8   | 3.9   | 4.0   | 4.4   |
| Xrn2     | 30.0  | 26.2  | 26.0  | 28.0  | 26.1  | 27.1  | 29.7  | 27.7  | 24.0  | 28.0  | 31.7  | 31.3  |
| Xrra1    | 0.2   | 0.2   | 0.1   | 0.2   | 0.3   | 0.2   | 0.1   | 0.1   | 0.1   | 0.2   | 0.1   | 0.1   |
| Xylb     | 0.3   | 0.2   | 0.2   | 0.7   | 0.2   | 0.4   | 0.1   | 0.1   | 0.1   | 0.3   | 0.1   | 0.1   |
| Xylt1    | 0.4   | 0.4   | 0.3   | 0.8   | 1.3   | 0.4   | 0.7   | 1.0   | 0.6   | 0.8   | 0.5   | 0.4   |
| Xylt2    | 6.1   | 4.7   | 5.6   | 10.8  | 16.9  | 5.1   | 7.6   | 6.3   | 6.0   | 5.5   | 4.6   | 5.4   |
| Yae1d1   | 8.4   | 8.1   | 7.8   | 9.6   | 8.3   | 10.8  | 7.8   | 8.3   | 7.3   | 8.7   | 10.7  | 9.8   |
| Yaf2     | 18.3  | 17.1  | 17.7  | 23.6  | 16.6  | 22.4  | 21.1  | 14.8  | 15.2  | 18.1  | 20.8  | 20.9  |
| Yap1     | 35.9  | 36.2  | 28.7  | 41.6  | 30.4  | 42.1  | 30.7  | 22.8  | 27.9  | 33.0  | 31.6  | 31.5  |
| Yars     | 25.0  | 20.3  | 15.5  | 22.9  | 19.2  | 23.2  | 21.4  | 24.2  | 21.7  | 18.6  | 22.6  | 18.0  |
| Yars2    | 7.7   | 5.6   | 4.3   | 5.8   | 6.2   | 6.5   | 5.3   | 5.1   | 5.7   | 8.0   | 6.6   | 5.8   |
| Ybey     | 1.0   | 1.0   | 1.0   | 1.3   | 0.9   | 1.3   | 0.8   | 1.3   | 1.1   | 1.0   | 1.1   | 0.9   |
| Ybx1     | 178.5 | 148.7 | 164.3 | 210.6 | 158.8 | 188.4 | 190.4 | 194.0 | 130.5 | 145.0 | 209.2 | 180.2 |
| Ydjc     | 3.3   | 3.0   | 1.6   | 3.7   | 2.9   | 4.2   | 3.3   | 2.1   | 3.1   | 2.7   | 2.7   | 2.4   |
| Yeats2   | 6.9   | 8.2   | 9.0   | 5.1   | 7.6   | 6.2   | 7.5   | 8.3   | 8.0   | 7.6   | 7.3   | 7.1   |
| Yeats4   | 14.9  | 13.2  | 14.1  | 16.5  | 15.8  | 13.6  | 16.9  | 16.4  | 16.1  | 14.7  | 16.6  | 15.7  |
| Yes1     | 9.5   | 10.4  | 9.5   | 7.8   | 6.8   | 9.5   | 9.2   | 9.2   | 9.4   | 9.1   | 11.1  | 10.7  |
| Yif1a    | 47.2  | 41.8  | 36.8  | 50.1  | 39.6  | 44.8  | 48.8  | 45.0  | 47.0  | 43.0  | 47.1  | 42.6  |
| Yif1b    | 42.6  | 39.8  | 31.5  | 44.1  | 34.5  | 38.6  | 39.0  | 45.3  | 45.7  | 30.9  | 36.6  | 36.6  |
| Yipf1    | 23.1  | 19.8  | 18.8  | 22.5  | 20.1  | 22.0  | 19.7  | 21.8  | 22.7  | 23.9  | 23.2  | 21.7  |
| Yipf2    | 10.2  | 10.1  | 10.9  | 9.7   | 9.0   | 11.3  | 9.4   | 11.4  | 9.1   | 10.0  | 11.6  | 10.0  |
| Yipf3    | 39.7  | 36.8  | 34.3  | 36.3  | 38.0  | 36.7  | 41.1  | 39.9  | 39.1  | 42.5  | 40.2  | 37.5  |
| Yipf4    | 33.3  | 30.5  | 30.6  | 34.2  | 31.1  | 30.5  | 34.4  | 31.1  | 35.8  | 40.3  | 37.6  | 40.3  |
| Yipf5    | 28.0  | 32.6  | 37.1  | 37.0  | 35.2  | 34.8  | 36.6  | 41.3  | 35.4  | 36.5  | 39.9  | 40.8  |
| Yipf6    | 5.9   | 6.4   | 6.3   | 8.1   | 7.1   | 6.9   | 5.8   | 5.7   | 5.9   | 6.4   | 7.2   | 6.3   |
| Ykt6     | 38.4  | 35.5  | 34.0  | 40.3  | 37.8  | 36.6  | 35.0  | 40.2  | 37.6  | 36.6  | 35.0  | 36.8  |
| Ylpm1    | 1.8   | 2.3   | 2.4   | 2.4   | 2.1   | 2.2   | 2.7   | 2.1   | 1.7   | 2.0   | 2.3   | 2.4   |
| Yme1l1   | 34.4  | 38.9  | 39.7  | 35.5  | 37.0  | 35.6  | 32.4  | 37.1  | 36.4  | 38.9  | 43.4  | 43.5  |
| Yod1     | 1.8   | 1.7   | 2.3   | 1.7   | 1.7   | 1.8   | 1.6   | 1.9   | 1.7   | 1.5   | 2.0   | 2.3   |
| Ypel1    | 1.5   | 0.8   | 1.2   | 1.2   | 0.9   | 1.5   | 0.9   | 1.3   | 1.1   | 0.8   | 1.1   | 0.9   |
| Ypel2    | 4.3   | 4.4   | 5.4   | 3.2   | 3.8   | 4.6   | 3.3   | 6.0   | 5.2   | 6.3   | 5.2   | 5.8   |
| Ypel3    | 35.2  | 36.6  | 39.5  | 32.8  | 30.1  | 40.5  | 31.0  | 43.1  | 38.5  | 37.3  | 34.1  | 38.8  |
| Ypel4    | 0.7   | 1.3   | 1.1   | 0.6   | 0.5   | 1.2   | 0.2   | 1.4   | 0.9   | 0.6   | 0.8   | 1.4   |
| Ypel5    | 35.8  | 28.8  | 25.6  | 38.6  | 31.3  | 37.0  | 28.6  | 27.2  | 34.9  | 34.2  | 32.9  | 36.6  |
| Yrdc     | 9.6   | 8.1   | 6.0   | 9.3   | 7.8   | 6.8   | 8.3   | 7.8   | 10.2  | 9.0   | 8.7   | 8.4   |
| Ythdc1   | 15.1  | 15.0  | 19.6  | 18.7  | 14.7  | 14.4  | 16.8  | 15.0  | 13.8  | 16.0  | 19.3  | 19.7  |
| Ythdc2   | 2.5   | 2.8   | 2.6   | 2.1   | 2.3   | 2.7   | 2.5   | 2.7   | 2.4   | 2.6   | 3.0   | 2.8   |
| Ythdf1   | 11.8  | 12.4  | 12.0  | 12.3  | 12.0  | 11.3  | 11.9  | 11.8  | 11.0  | 12.9  | 11.9  | 11.2  |
| Ythdf2   | 13.0  | 12.5  | 12.4  | 13.1  | 13.3  | 12.1  | 12.5  | 13.5  | 13.8  | 13.8  | 14.6  | 13.8  |
| Ythdf3   | 10.0  | 11.6  | 13.3  | 11.1  | 12.0  | 12.5  | 11.5  | 12.2  | 11.4  | 11.6  | 13.5  | 13.3  |
| Ywhab    | 45.4  | 56.0  | 58.8  | 52.9  | 64.1  | 50.8  | 63.4  | 64.8  | 62.0  | 58.6  | 62.2  | 63.6  |
| Ywhae    | 87.8  | 105.3 | 108.9 | 121.1 | 102.8 | 112.8 | 128.8 | 125.3 | 101.2 | 100.8 | 127.7 | 109.4 |
| Ywhag    | 70.9  | 74.9  | 68.2  | 88.6  | 86.4  | 85.0  | 89.1  | 77.1  | 82.1  | 90.2  | 92.0  | 79.0  |
| Ywhah    | 46.1  | 39.5  | 41.6  | 66.6  | 64.1  | 45.8  | 54.4  | 46.6  | 47.2  | 38.3  | 45.0  | 45.0  |

Online Table 1

|         |       |       |      |       |       |       |       |       |       |       |       |       |
|---------|-------|-------|------|-------|-------|-------|-------|-------|-------|-------|-------|-------|
| Ywhaq   | 105.9 | 100.6 | 93.6 | 110.1 | 101.6 | 113.3 | 102.4 | 102.2 | 105.6 | 108.4 | 116.9 | 100.2 |
| Ywhaz   | 99.9  | 94.8  | 99.5 | 114.0 | 110.4 | 104.3 | 124.8 | 116.9 | 106.4 | 106.9 | 129.6 | 112.6 |
| Yy1     | 14.9  | 17.4  | 19.2 | 13.3  | 15.6  | 15.9  | 16.5  | 17.3  | 15.8  | 17.9  | 17.5  | 18.2  |
| Yy2     | 0.2   | 0.3   | 0.6  | 0.4   | 0.4   | 0.3   | 0.5   | 0.4   | 0.5   | 0.3   | 0.2   | 0.5   |
| Zadh2   | 3.9   | 4.6   | 4.6  | 4.8   | 4.9   | 5.3   | 4.4   | 5.3   | 4.5   | 5.0   | 4.5   | 4.8   |
| Zan     | 0.0   | 0.0   | 0.0  | 0.0   | 0.0   | 0.0   | 0.0   | 0.0   | 0.0   | 0.0   | 0.0   | 0.0   |
| Zap70   | 0.0   | 0.0   | 0.0  | 0.1   | 0.0   | 0.1   | 0.1   | 0.0   | 0.0   | 0.0   | 0.0   | 0.0   |
| Zbed3   | 2.0   | 2.6   | 2.9  | 2.9   | 2.1   | 2.4   | 2.6   | 3.3   | 2.5   | 2.8   | 2.8   | 2.4   |
| Zbed4   | 1.8   | 2.4   | 2.0  | 1.8   | 2.4   | 1.5   | 2.0   | 2.1   | 2.3   | 2.1   | 2.5   | 2.1   |
| Zbed6   | 7.5   | 9.0   | 9.3  | 7.1   | 9.9   | 7.0   | 10.2  | 10.9  | 9.9   | 9.0   | 9.3   | 9.4   |
| Zbp1    | 9.2   | 6.2   | 9.3  | 10.0  | 8.8   | 3.0   | 5.7   | 3.4   | 3.0   | 2.4   | 2.0   | 7.0   |
| Zbtb1   | 8.4   | 9.3   | 9.9  | 9.3   | 8.3   | 7.4   | 10.1  | 10.9  | 10.5  | 10.4  | 11.0  | 11.6  |
| Zbtb10  | 1.6   | 1.8   | 1.9  | 1.3   | 1.5   | 1.6   | 1.5   | 1.5   | 1.6   | 1.6   | 1.9   | 1.6   |
| Zbtb11  | 5.6   | 5.5   | 5.2  | 5.5   | 5.2   | 5.9   | 4.7   | 5.0   | 4.7   | 5.7   | 6.0   | 6.0   |
| Zbtb12  | 1.8   | 1.4   | 1.3  | 1.2   | 1.2   | 1.6   | 0.8   | 1.5   | 0.9   | 1.5   | 1.5   | 1.0   |
| Zbtb14  | 5.6   | 5.4   | 6.6  | 6.8   | 5.8   | 5.8   | 5.9   | 5.9   | 5.6   | 4.7   | 6.5   | 5.8   |
| Zbtb16  | 0.0   | 0.1   | 0.3  | 0.0   | 0.1   | 0.0   | 0.0   | 0.1   | 0.0   | 0.0   | 0.0   | 0.0   |
| Zbtb17  | 3.6   | 3.9   | 3.7  | 4.5   | 4.1   | 4.7   | 3.8   | 4.3   | 3.6   | 4.2   | 3.5   | 3.5   |
| Zbtb18  | 5.8   | 5.8   | 4.8  | 8.2   | 5.8   | 7.8   | 5.6   | 4.3   | 5.3   | 4.4   | 6.9   | 4.8   |
| Zbtb2   | 4.1   | 4.4   | 6.2  | 4.7   | 5.0   | 4.3   | 4.9   | 5.3   | 6.0   | 4.9   | 5.1   | 4.7   |
| Zbtb20  | 8.8   | 10.1  | 9.6  | 8.1   | 5.7   | 8.0   | 6.5   | 7.4   | 5.5   | 4.9   | 6.0   | 5.1   |
| Zbtb21  | 3.1   | 3.3   | 2.8  | 3.7   | 3.4   | 3.8   | 2.9   | 2.7   | 2.4   | 2.9   | 2.7   | 2.5   |
| Zbtb22  | 5.5   | 5.6   | 6.1  | 6.5   | 5.7   | 5.5   | 7.0   | 6.7   | 8.0   | 5.6   | 6.4   | 6.7   |
| Zbtb24  | 5.7   | 5.2   | 5.6  | 4.3   | 4.5   | 5.1   | 4.3   | 4.7   | 4.3   | 5.3   | 5.4   | 5.8   |
| Zbtb25  | 2.7   | 2.6   | 3.0  | 2.9   | 2.5   | 3.4   | 2.7   | 3.1   | 2.5   | 2.6   | 2.8   | 2.4   |
| Zbtb26  | 1.6   | 2.4   | 2.5  | 1.7   | 2.2   | 2.3   | 1.5   | 2.1   | 2.4   | 2.3   | 2.4   | 2.6   |
| Zbtb3   | 0.7   | 1.1   | 1.1  | 0.8   | 1.0   | 0.9   | 1.3   | 1.4   | 0.8   | 1.2   | 1.3   | 1.1   |
| Zbtb32  | 0.3   | 0.2   | 0.3  | 0.7   | 0.3   | 0.4   | 0.3   | 0.3   | 0.2   | 0.1   | 0.1   | 0.3   |
| Zbtb33  | 1.5   | 1.9   | 2.4  | 1.4   | 1.6   | 1.3   | 1.6   | 1.5   | 1.5   | 2.0   | 1.8   | 2.6   |
| Zbtb34  | 0.5   | 0.5   | 0.6  | 0.5   | 0.8   | 0.5   | 0.7   | 0.7   | 0.7   | 0.7   | 0.6   | 0.6   |
| Zbtb37  | 1.8   | 1.8   | 2.0  | 1.6   | 1.8   | 2.0   | 1.5   | 2.1   | 1.9   | 1.8   | 2.0   | 1.8   |
| Zbtb38  | 32.6  | 31.5  | 29.4 | 39.3  | 31.2  | 36.4  | 40.9  | 31.7  | 29.5  | 28.1  | 37.7  | 34.2  |
| Zbtb39  | 0.8   | 0.7   | 1.1  | 0.8   | 1.0   | 0.9   | 1.2   | 0.8   | 1.0   | 1.1   | 0.9   | 1.0   |
| Zbtb4   | 16.3  | 16.9  | 16.2 | 18.3  | 14.1  | 19.5  | 15.6  | 13.6  | 14.2  | 12.2  | 14.0  | 14.5  |
| Zbtb40  | 1.9   | 2.3   | 1.6  | 2.1   | 2.3   | 2.0   | 2.0   | 1.8   | 1.9   | 2.0   | 2.0   | 1.9   |
| Zbtb41  | 8.3   | 8.1   | 7.8  | 9.8   | 7.0   | 9.8   | 6.8   | 7.1   | 7.0   | 8.7   | 10.0  | 9.1   |
| Zbtb42  | 0.9   | 1.0   | 0.9  | 1.3   | 1.3   | 1.2   | 1.0   | 0.9   | 1.1   | 1.2   | 1.3   | 0.7   |
| Zbtb43  | 4.0   | 4.0   | 3.7  | 4.5   | 4.2   | 4.4   | 4.2   | 3.8   | 3.8   | 3.8   | 3.9   | 4.1   |
| Zbtb44  | 3.6   | 3.9   | 4.0  | 3.4   | 3.5   | 3.6   | 3.5   | 3.0   | 3.4   | 3.5   | 3.6   | 3.6   |
| Zbtb45  | 1.2   | 0.9   | 0.8  | 1.3   | 1.3   | 1.2   | 1.0   | 1.4   | 1.2   | 1.1   | 1.2   | 0.9   |
| Zbtb46  | 1.9   | 2.3   | 2.1  | 1.5   | 1.8   | 2.2   | 2.0   | 1.9   | 2.1   | 2.8   | 1.8   | 1.8   |
| Zbtb48  | 1.7   | 1.6   | 1.6  | 1.6   | 1.8   | 1.4   | 1.5   | 1.9   | 1.6   | 1.3   | 1.6   | 1.2   |
| Zbtb49  | 1.2   | 1.3   | 1.3  | 1.2   | 1.6   | 1.4   | 1.5   | 1.6   | 1.4   | 1.4   | 1.2   | 1.2   |
| Zbtb5   | 2.4   | 2.6   | 2.4  | 2.1   | 2.2   | 1.9   | 2.5   | 2.4   | 2.7   | 2.8   | 2.1   | 2.8   |
| Zbtb6   | 3.2   | 4.0   | 4.8  | 3.6   | 4.2   | 4.3   | 3.9   | 4.2   | 4.1   | 4.2   | 4.8   | 5.3   |
| Zbtb7a  | 6.9   | 8.5   | 8.0  | 7.5   | 9.0   | 7.8   | 10.3  | 8.2   | 8.5   | 6.9   | 7.6   | 7.8   |
| Zbtb7b  | 12.7  | 12.3  | 10.8 | 15.2  | 14.0  | 13.2  | 12.2  | 13.1  | 12.3  | 11.3  | 11.6  | 11.3  |
| Zbtb7c  | 5.0   | 5.7   | 6.1  | 6.2   | 5.9   | 6.0   | 6.7   | 6.0   | 5.4   | 6.0   | 4.9   | 5.4   |
| Zbtb8a  | 1.2   | 2.2   | 3.3  | 0.5   | 1.4   | 0.9   | 2.2   | 2.8   | 3.0   | 1.7   | 2.3   | 2.2   |
| Zbtb8b  | 0.5   | 0.9   | 0.8  | 0.3   | 0.8   | 0.4   | 0.7   | 0.3   | 0.7   | 0.7   | 0.6   | 1.0   |
| Zbtb8os | 27.1  | 31.2  | 32.5 | 28.0  | 24.5  | 33.8  | 27.9  | 28.5  | 26.2  | 30.3  | 34.8  | 31.6  |
| Zbtb9   | 3.5   | 3.8   | 3.8  | 3.2   | 3.7   | 3.2   | 3.5   | 3.6   | 3.6   | 3.9   | 3.7   | 3.6   |
| Zbtbd6  | 0.1   | 0.2   | 0.3  | 0.1   | 0.3   | 0.2   | 0.4   | 0.2   | 0.3   | 0.3   | 0.2   | 0.3   |
| Zc2hc1a | 17.3  | 18.3  | 18.3 | 20.0  | 13.2  | 18.6  | 18.2  | 13.5  | 19.4  | 16.3  | 18.9  | 23.9  |
| Zc2hc1c | 0.4   | 0.4   | 0.4  | 0.3   | 0.3   | 0.5   | 0.3   | 0.3   | 0.4   | 0.5   | 0.5   | 0.5   |
| Zc3h10  | 4.1   | 3.6   | 3.4  | 3.5   | 4.3   | 4.5   | 3.6   | 2.9   | 4.0   | 4.6   | 4.0   | 3.4   |
| Zc3h11a | 21.4  | 24.6  | 23.9 | 18.5  | 22.5  | 20.3  | 23.7  | 25.1  | 23.9  | 23.4  | 23.4  | 24.3  |

Online Table 1

|          |      |      |      |      |      |      |      |      |      |      |      |      |
|----------|------|------|------|------|------|------|------|------|------|------|------|------|
| Zc3h12a  | 3.4  | 3.9  | 5.1  | 3.4  | 6.8  | 3.1  | 5.9  | 5.2  | 5.6  | 3.6  | 3.4  | 4.1  |
| Zc3h12b  | 1.3  | 1.4  | 1.6  | 1.2  | 1.2  | 1.4  | 1.6  | 1.6  | 1.3  | 1.2  | 1.2  | 1.3  |
| Zc3h12c  | 2.6  | 2.6  | 2.9  | 2.5  | 3.7  | 2.3  | 2.8  | 2.5  | 2.2  | 2.4  | 2.2  | 2.6  |
| Zc3h12d  | 0.1  | 0.0  | 0.0  | 0.8  | 1.4  | 0.0  | 0.2  | 0.0  | 0.0  | 0.1  | 0.1  | 0.0  |
| Zc3h13   | 12.1 | 10.9 | 13.5 | 14.9 | 10.5 | 12.2 | 13.0 | 10.7 | 8.8  | 10.2 | 13.8 | 14.2 |
| Zc3h14   | 33.1 | 34.8 | 31.8 | 31.5 | 26.2 | 36.1 | 27.8 | 26.4 | 25.3 | 27.4 | 32.1 | 30.0 |
| Zc3h15   | 56.8 | 56.9 | 54.6 | 60.7 | 48.7 | 56.3 | 53.6 | 51.4 | 49.8 | 55.4 | 60.6 | 66.3 |
| Zc3h18   | 15.2 | 16.2 | 17.8 | 19.5 | 15.1 | 16.2 | 20.2 | 16.1 | 14.7 | 16.1 | 17.7 | 18.3 |
| Zc3h3    | 1.5  | 1.9  | 1.5  | 1.8  | 1.6  | 1.7  | 1.7  | 1.5  | 1.3  | 1.5  | 1.3  | 1.3  |
| Zc3h4    | 5.4  | 5.8  | 6.5  | 5.1  | 5.3  | 5.3  | 6.4  | 6.3  | 5.8  | 5.6  | 5.6  | 6.1  |
| Zc3h6    | 2.0  | 2.1  | 2.7  | 1.7  | 1.3  | 2.2  | 1.6  | 2.2  | 1.8  | 1.6  | 2.2  | 2.1  |
| Zc3h7a   | 16.2 | 18.3 | 16.3 | 15.9 | 18.1 | 12.8 | 17.4 | 14.7 | 18.7 | 15.8 | 19.2 | 18.6 |
| Zc3h7b   | 14.3 | 15.0 | 13.3 | 16.1 | 13.1 | 16.7 | 14.8 | 13.1 | 12.6 | 13.2 | 12.5 | 12.0 |
| Zc3h8    | 1.5  | 1.8  | 1.2  | 1.6  | 1.2  | 1.4  | 1.1  | 1.1  | 1.4  | 1.8  | 1.2  | 1.4  |
| Zc3hav1  | 18.6 | 15.4 | 17.0 | 19.9 | 18.1 | 16.8 | 16.4 | 15.9 | 14.9 | 12.1 | 13.1 | 16.1 |
| Zc3hav1l | 0.7  | 1.1  | 1.1  | 0.8  | 0.7  | 1.0  | 0.9  | 1.0  | 1.0  | 0.8  | 0.8  | 0.7  |
| Zc3hc1   | 6.8  | 6.5  | 7.1  | 6.0  | 6.3  | 7.1  | 5.4  | 6.6  | 6.8  | 6.4  | 6.5  | 5.2  |
| Zc4h2    | 4.1  | 4.0  | 3.4  | 4.3  | 2.8  | 4.3  | 3.0  | 3.6  | 3.9  | 3.3  | 3.6  | 4.0  |
| Zcchc10  | 2.1  | 3.3  | 3.5  | 2.1  | 2.6  | 2.8  | 3.2  | 2.6  | 2.1  | 2.9  | 2.2  | 2.6  |
| Zcchc11  | 2.5  | 3.8  | 3.9  | 1.9  | 2.9  | 2.8  | 2.5  | 3.0  | 2.8  | 3.5  | 3.0  | 2.8  |
| Zcchc14  | 3.9  | 5.6  | 5.3  | 3.8  | 4.8  | 3.9  | 5.8  | 5.6  | 6.1  | 5.7  | 4.8  | 4.9  |
| Zcchc17  | 33.9 | 24.1 | 25.2 | 36.7 | 22.6 | 26.7 | 24.1 | 24.0 | 20.0 | 25.4 | 29.2 | 28.4 |
| Zcchc18  | 0.2  | 0.1  | 0.3  | 0.0  | 0.1  | 0.2  | 0.3  | 0.2  | 0.2  | 0.1  | 0.1  | 0.2  |
| Zcchc2   | 3.5  | 3.6  | 3.4  | 4.2  | 3.9  | 4.0  | 3.6  | 2.6  | 3.1  | 3.6  | 3.3  | 3.3  |
| Zcchc24  | 17.7 | 18.8 | 19.4 | 16.5 | 15.7 | 19.6 | 16.7 | 17.7 | 17.0 | 19.5 | 18.2 | 18.1 |
| Zcchc3   | 1.6  | 1.4  | 1.9  | 0.9  | 1.4  | 0.8  | 1.8  | 2.3  | 2.0  | 3.5  | 2.5  | 2.3  |
| Zcchc4   | 2.9  | 2.9  | 2.6  | 2.9  | 2.7  | 3.1  | 2.2  | 2.4  | 2.4  | 3.0  | 2.6  | 2.9  |
| Zcchc5   | 0.0  | 0.0  | 0.0  | 0.1  | 0.0  | 0.1  | 0.0  | 0.1  | 0.2  | 0.1  | 0.0  | 0.0  |
| Zcchc6   | 20.5 | 19.7 | 21.1 | 23.4 | 19.2 | 21.0 | 19.4 | 16.7 | 15.9 | 17.4 | 19.3 | 20.7 |
| Zcchc7   | 9.3  | 8.7  | 9.8  | 9.3  | 7.1  | 7.3  | 7.4  | 9.0  | 6.8  | 8.4  | 9.2  | 10.8 |
| Zcchc8   | 3.3  | 3.9  | 4.7  | 3.4  | 3.8  | 3.2  | 3.7  | 4.3  | 4.2  | 3.8  | 4.0  | 4.1  |
| Zcchc9   | 15.8 | 14.0 | 12.8 | 14.6 | 12.5 | 13.9 | 12.8 | 13.1 | 12.8 | 13.0 | 15.6 | 13.7 |
| Zcrb1    | 40.1 | 32.3 | 40.8 | 54.6 | 38.9 | 45.0 | 45.0 | 38.1 | 32.0 | 36.3 | 46.3 | 45.7 |
| Zcwpw1   | 0.7  | 0.6  | 1.1  | 0.7  | 0.5  | 1.0  | 0.5  | 0.3  | 0.6  | 0.4  | 0.5  | 0.6  |
| Zdbf2    | 0.0  | 0.0  | 0.0  | 0.0  | 0.0  | 0.0  | 0.0  | 0.0  | 0.0  | 0.1  | 0.1  | 0.0  |
| Zdhhc1   | 5.2  | 5.7  | 5.3  | 6.7  | 5.4  | 6.8  | 6.1  | 6.2  | 4.7  | 5.1  | 4.5  | 6.0  |
| Zdhhc12  | 3.8  | 4.2  | 4.8  | 2.9  | 4.1  | 3.4  | 3.9  | 4.5  | 5.4  | 7.2  | 5.1  | 5.1  |
| Zdhhc13  | 8.1  | 7.0  | 7.7  | 7.1  | 8.5  | 6.2  | 8.8  | 8.3  | 8.8  | 8.3  | 9.8  | 8.0  |
| Zdhhc14  | 1.5  | 1.4  | 1.0  | 2.0  | 1.7  | 1.8  | 1.8  | 1.0  | 1.4  | 1.1  | 1.1  | 1.4  |
| Zdhhc15  | 0.7  | 1.0  | 1.3  | 0.4  | 0.8  | 0.6  | 0.6  | 0.8  | 0.6  | 0.5  | 0.4  | 0.6  |
| Zdhhc16  | 6.4  | 7.3  | 5.3  | 7.4  | 7.2  | 5.1  | 8.9  | 10.4 | 9.8  | 6.6  | 7.9  | 6.9  |
| Zdhhc17  | 6.0  | 6.5  | 6.4  | 5.3  | 5.4  | 5.8  | 5.3  | 6.2  | 6.8  | 6.6  | 6.1  | 7.0  |
| Zdhhc18  | 7.4  | 8.7  | 6.6  | 9.0  | 10.3 | 8.4  | 8.5  | 6.1  | 7.9  | 7.0  | 7.0  | 6.4  |
| Zdhhc2   | 33.4 | 23.3 | 27.2 | 36.1 | 48.5 | 37.9 | 38.3 | 31.7 | 37.6 | 35.0 | 52.0 | 36.7 |
| Zdhhc20  | 12.3 | 14.2 | 15.8 | 14.3 | 14.7 | 13.4 | 14.3 | 14.1 | 14.4 | 15.8 | 16.3 | 17.5 |
| Zdhhc21  | 3.3  | 3.8  | 3.9  | 3.6  | 3.9  | 4.1  | 3.5  | 3.3  | 3.5  | 3.2  | 4.2  | 3.8  |
| Zdhhc24  | 4.3  | 3.9  | 3.6  | 4.7  | 3.9  | 4.2  | 4.0  | 3.5  | 4.3  | 4.5  | 4.1  | 4.2  |
| Zdhhc3   | 7.7  | 6.0  | 5.5  | 7.1  | 6.7  | 6.5  | 6.7  | 6.8  | 6.3  | 6.6  | 6.8  | 6.4  |
| Zdhhc4   | 10.0 | 8.4  | 7.8  | 11.6 | 8.3  | 10.7 | 10.4 | 10.4 | 8.2  | 8.3  | 9.3  | 8.1  |
| Zdhhc5   | 22.2 | 21.6 | 21.9 | 24.1 | 23.9 | 23.0 | 26.4 | 22.9 | 23.3 | 23.7 | 25.8 | 23.9 |
| Zdhhc6   | 21.8 | 22.5 | 23.9 | 23.4 | 22.6 | 24.6 | 22.3 | 23.6 | 19.5 | 21.5 | 24.2 | 22.4 |
| Zdhhc7   | 8.8  | 9.5  | 9.0  | 9.5  | 9.4  | 8.8  | 10.7 | 10.4 | 11.0 | 8.4  | 9.4  | 8.3  |
| Zdhhc8   | 5.0  | 6.3  | 5.7  | 6.0  | 5.3  | 6.3  | 7.8  | 5.9  | 7.0  | 4.4  | 5.3  | 4.4  |
| Zdhhc9   | 5.4  | 4.8  | 4.0  | 5.2  | 4.9  | 4.4  | 5.6  | 4.7  | 4.9  | 4.2  | 5.4  | 3.3  |
| Zeb1     | 17.9 | 17.3 | 19.0 | 24.0 | 15.7 | 22.6 | 18.2 | 17.1 | 15.2 | 13.9 | 17.7 | 18.2 |
| Zeb2     | 26.3 | 25.7 | 28.1 | 44.3 | 31.7 | 31.6 | 31.2 | 26.3 | 23.3 | 21.7 | 28.4 | 30.7 |
| Zer1     | 4.9  | 5.7  | 5.3  | 4.7  | 4.8  | 5.6  | 5.0  | 5.4  | 5.5  | 5.6  | 4.8  | 4.7  |

Online Table 1

|           |      |      |      |      |      |      |      |      |      |      |      |      |
|-----------|------|------|------|------|------|------|------|------|------|------|------|------|
| Zfand1    | 8.4  | 8.5  | 7.9  | 6.5  | 5.9  | 8.1  | 6.5  | 6.8  | 5.9  | 7.8  | 7.5  | 9.0  |
| Zfand2a   | 17.4 | 13.0 | 9.3  | 24.4 | 18.1 | 17.2 | 16.2 | 8.6  | 13.2 | 14.4 | 14.5 | 13.2 |
| Zfand2b   | 7.4  | 8.7  | 6.5  | 7.5  | 7.0  | 8.1  | 8.8  | 9.4  | 10.0 | 7.5  | 9.0  | 7.6  |
| Zfand3    | 40.0 | 37.1 | 31.7 | 42.7 | 31.8 | 48.1 | 36.3 | 30.9 | 33.4 | 32.2 | 36.5 | 33.1 |
| Zfand4    | 0.3  | 0.4  | 0.6  | 0.2  | 0.5  | 0.2  | 0.5  | 0.3  | 0.4  | 0.3  | 0.4  | 0.2  |
| Zfand5    | 5.6  | 5.2  | 4.9  | 6.9  | 6.3  | 5.8  | 5.2  | 5.7  | 6.3  | 7.3  | 6.4  | 6.6  |
| Zfand6    | 18.2 | 20.6 | 17.9 | 19.1 | 20.3 | 21.5 | 15.0 | 18.1 | 16.1 | 20.3 | 19.6 | 20.1 |
| Zfa-ps    | 0.2  | 0.3  | 0.2  | 0.3  | 0.3  | 0.2  | 0.2  | 0.2  | 0.2  | 0.3  | 0.2  | 0.3  |
| Zfat      | 1.5  | 1.5  | 1.3  | 1.3  | 1.4  | 1.2  | 1.6  | 1.4  | 1.6  | 1.6  | 2.0  | 1.6  |
| Zfc3h1    | 10.8 | 11.7 | 11.0 | 9.6  | 9.8  | 10.5 | 9.4  | 10.2 | 10.2 | 9.8  | 10.9 | 10.9 |
| Zfhx2     | 0.0  | 0.0  | 0.0  | 0.0  | 0.0  | 0.0  | 0.0  | 0.0  | 0.0  | 0.0  | 0.0  | 0.0  |
| Zfhx2as   | 0.0  | 0.0  | 0.0  | 0.1  | 0.0  | 0.1  | 0.0  | 0.0  | 0.0  | 0.0  | 0.0  | 0.0  |
| Zfhx3     | 1.4  | 2.2  | 2.0  | 2.0  | 2.2  | 2.0  | 2.8  | 2.1  | 2.3  | 2.0  | 2.3  | 1.7  |
| Zfhx4     | 0.2  | 0.2  | 0.2  | 0.1  | 0.1  | 0.2  | 0.2  | 0.2  | 0.2  | 0.5  | 0.5  | 0.4  |
| Zfml      | 15.5 | 15.8 | 14.4 | 14.4 | 14.7 | 13.8 | 12.6 | 13.4 | 14.1 | 17.4 | 17.9 | 15.8 |
| Zfp1      | 2.3  | 2.3  | 2.5  | 1.9  | 2.0  | 2.0  | 2.3  | 3.3  | 2.3  | 2.9  | 2.6  | 3.7  |
| Zfp101    | 2.0  | 1.9  | 2.4  | 1.7  | 2.1  | 1.5  | 2.1  | 2.0  | 2.4  | 2.4  | 2.2  | 2.7  |
| Zfp105    | 4.1  | 3.3  | 3.9  | 3.5  | 3.0  | 3.0  | 3.2  | 3.8  | 3.5  | 3.6  | 4.0  | 4.5  |
| Zfp106    | 31.2 | 24.7 | 22.3 | 36.8 | 23.7 | 35.4 | 23.0 | 20.4 | 17.3 | 19.5 | 23.6 | 23.0 |
| Zfp108    | 1.6  | 1.6  | 2.2  | 1.3  | 1.3  | 2.4  | 1.6  | 1.8  | 1.3  | 1.9  | 1.8  | 1.7  |
| Zfp109    | 1.4  | 1.5  | 2.0  | 1.8  | 1.4  | 1.9  | 1.2  | 1.4  | 1.2  | 1.5  | 1.9  | 1.7  |
| Zfp11     | 1.0  | 1.2  | 1.6  | 1.1  | 1.1  | 1.4  | 1.1  | 1.3  | 1.3  | 1.3  | 1.4  | 1.3  |
| Zfp110    | 10.9 | 9.8  | 9.4  | 9.9  | 8.0  | 10.2 | 7.4  | 10.0 | 9.9  | 10.6 | 10.7 | 11.4 |
| Zfp111    | 1.4  | 1.4  | 1.8  | 1.4  | 1.4  | 1.9  | 1.7  | 1.8  | 1.5  | 1.5  | 1.7  | 1.7  |
| Zfp112    | 1.0  | 1.0  | 1.4  | 0.8  | 0.9  | 1.5  | 1.2  | 1.3  | 1.1  | 1.2  | 1.3  | 1.3  |
| Zfp113    | 1.1  | 1.3  | 1.3  | 1.0  | 0.9  | 1.3  | 0.9  | 1.2  | 1.1  | 1.5  | 1.4  | 1.2  |
| Zfp114    | 0.2  | 0.2  | 0.4  | 0.3  | 0.1  | 0.4  | 0.2  | 0.2  | 0.2  | 0.2  | 0.3  | 0.2  |
| Zfp119a   | 1.9  | 2.7  | 2.5  | 1.6  | 2.3  | 2.6  | 1.5  | 2.0  | 2.2  | 2.5  | 2.4  | 2.0  |
| Zfp119b   | 1.3  | 1.3  | 1.6  | 1.1  | 1.7  | 1.2  | 1.4  | 1.4  | 1.8  | 1.9  | 1.7  | 1.6  |
| Zfp12     | 3.4  | 3.5  | 3.4  | 3.2  | 3.1  | 3.5  | 3.1  | 3.9  | 3.7  | 4.2  | 3.8  | 4.3  |
| Zfp120    | 3.2  | 3.7  | 4.9  | 3.4  | 4.0  | 3.1  | 3.1  | 3.8  | 4.3  | 3.8  | 3.9  | 4.9  |
| Zfp128    | 1.3  | 0.9  | 1.4  | 1.1  | 0.8  | 1.0  | 1.0  | 0.9  | 1.0  | 1.0  | 0.8  | 1.0  |
| Zfp13     | 1.8  | 2.1  | 2.2  | 2.4  | 1.8  | 2.3  | 2.1  | 2.4  | 1.7  | 1.6  | 2.2  | 1.6  |
| Zfp131    | 17.6 | 16.8 | 16.4 | 20.3 | 14.6 | 17.3 | 15.3 | 15.7 | 15.1 | 14.4 | 18.5 | 16.8 |
| Zfp133-ps | 0.8  | 0.7  | 0.9  | 1.3  | 0.4  | 0.6  | 0.8  | 0.6  | 0.5  | 1.2  | 0.7  | 0.5  |
| Zfp14     | 2.2  | 2.0  | 2.1  | 2.0  | 1.7  | 2.6  | 1.7  | 2.0  | 1.5  | 2.1  | 1.7  | 1.9  |
| Zfp142    | 1.1  | 1.3  | 1.2  | 1.4  | 1.4  | 1.4  | 1.6  | 1.4  | 1.1  | 1.1  | 1.3  | 1.1  |
| Zfp143    | 5.3  | 5.3  | 4.6  | 5.9  | 5.1  | 5.1  | 5.3  | 5.0  | 5.1  | 5.4  | 6.0  | 5.5  |
| Zfp146    | 19.7 | 15.3 | 15.8 | 21.3 | 18.3 | 18.7 | 19.1 | 19.8 | 15.9 | 18.8 | 19.7 | 23.0 |
| Zfp148    | 6.0  | 6.7  | 7.7  | 6.0  | 5.8  | 6.8  | 5.9  | 8.1  | 7.1  | 7.1  | 8.0  | 7.8  |
| Zfp157    | 2.0  | 1.7  | 2.0  | 2.0  | 1.8  | 1.6  | 1.5  | 1.9  | 1.9  | 2.1  | 2.2  | 2.1  |
| Zfp160    | 2.4  | 2.5  | 2.6  | 3.0  | 2.6  | 2.6  | 2.6  | 3.1  | 2.9  | 2.9  | 3.3  | 3.4  |
| Zfp169    | 1.3  | 1.3  | 1.6  | 1.3  | 1.5  | 1.5  | 1.2  | 1.5  | 1.2  | 1.2  | 1.2  | 1.4  |
| Zfp174    | 0.9  | 1.1  | 1.2  | 0.9  | 0.9  | 1.0  | 1.1  | 0.9  | 1.0  | 0.9  | 0.8  | 1.0  |
| Zfp180    | 8.0  | 7.9  | 6.2  | 7.8  | 6.9  | 7.1  | 6.6  | 6.5  | 6.6  | 6.6  | 8.4  | 6.5  |
| Zfp182    | 1.9  | 2.2  | 2.2  | 2.4  | 1.8  | 2.0  | 1.7  | 1.9  | 1.8  | 2.0  | 2.6  | 2.8  |
| Zfp184    | 0.7  | 0.6  | 0.8  | 0.5  | 0.3  | 0.4  | 0.4  | 0.6  | 0.4  | 0.8  | 0.5  | 0.3  |
| Zfp185    | 0.2  | 0.1  | 0.1  | 0.0  | 0.1  | 0.0  | 0.1  | 0.2  | 0.1  | 1.2  | 0.6  | 0.3  |
| Zfp189    | 2.7  | 2.8  | 3.4  | 2.1  | 2.0  | 2.2  | 2.2  | 3.1  | 2.4  | 2.5  | 2.6  | 2.6  |
| Zfp191    | 8.0  | 8.5  | 10.4 | 8.6  | 9.4  | 7.7  | 8.1  | 9.2  | 9.2  | 11.8 | 11.0 | 11.7 |
| Zfp2      | 1.5  | 1.3  | 1.5  | 1.6  | 1.3  | 1.7  | 0.9  | 1.3  | 1.3  | 1.8  | 2.1  | 1.5  |
| Zfp202    | 1.4  | 1.0  | 0.9  | 1.3  | 0.9  | 1.1  | 0.8  | 0.9  | 0.8  | 1.2  | 1.2  | 0.9  |
| Zfp207    | 41.5 | 41.9 | 50.9 | 48.3 | 45.1 | 38.4 | 50.9 | 48.3 | 42.8 | 41.9 | 50.9 | 47.1 |
| Zfp212    | 2.2  | 2.5  | 2.8  | 2.7  | 2.5  | 2.5  | 2.4  | 2.7  | 3.0  | 2.9  | 2.8  | 2.8  |
| Zfp213    | 2.7  | 2.4  | 2.2  | 2.9  | 2.7  | 2.8  | 2.0  | 2.8  | 2.4  | 3.0  | 2.6  | 2.5  |
| Zfp217    | 3.0  | 3.2  | 4.4  | 3.0  | 3.9  | 2.8  | 3.5  | 3.0  | 3.1  | 3.1  | 3.0  | 3.1  |
| Zfp219    | 10.2 | 10.8 | 8.6  | 10.8 | 10.2 | 12.1 | 10.3 | 8.5  | 8.7  | 10.5 | 8.0  | 7.7  |

Online Table 1

|         |      |      |      |      |      |      |      |      |      |      |      |      |
|---------|------|------|------|------|------|------|------|------|------|------|------|------|
| Zfp229  | 2.4  | 2.6  | 2.9  | 2.4  | 2.3  | 2.4  | 1.9  | 2.6  | 2.4  | 2.4  | 2.9  | 2.8  |
| Zfp235  | 1.7  | 2.1  | 2.4  | 2.0  | 1.6  | 1.5  | 1.3  | 2.1  | 1.8  | 1.7  | 2.0  | 1.8  |
| Zfp236  | 2.8  | 3.3  | 3.6  | 2.9  | 3.0  | 3.1  | 3.2  | 3.7  | 3.3  | 3.1  | 3.4  | 3.0  |
| Zfp239  | 0.8  | 0.8  | 0.7  | 0.3  | 0.5  | 1.1  | 0.5  | 0.8  | 0.4  | 0.6  | 0.9  | 0.6  |
| Zfp248  | 1.2  | 1.3  | 1.3  | 0.9  | 1.0  | 1.1  | 0.9  | 1.1  | 1.1  | 1.2  | 1.6  | 1.2  |
| Zfp251  | 8.5  | 7.8  | 8.7  | 8.6  | 7.7  | 10.3 | 7.8  | 8.2  | 8.5  | 8.3  | 8.0  | 9.0  |
| Zfp259  | 11.0 | 8.1  | 7.3  | 10.8 | 9.5  | 9.9  | 8.8  | 8.0  | 8.5  | 8.7  | 8.7  | 8.2  |
| Zfp26   | 2.1  | 2.3  | 2.7  | 2.2  | 2.4  | 2.4  | 2.2  | 2.8  | 2.5  | 2.4  | 3.0  | 2.6  |
| Zfp260  | 15.7 | 17.1 | 18.6 | 17.2 | 16.3 | 17.4 | 15.1 | 19.2 | 19.2 | 19.2 | 20.2 | 22.1 |
| Zfp263  | 5.1  | 5.0  | 4.9  | 5.4  | 7.4  | 5.2  | 5.0  | 4.7  | 4.8  | 6.4  | 5.6  | 5.5  |
| Zfp266  | 13.6 | 13.2 | 13.8 | 11.8 | 11.7 | 14.5 | 11.2 | 14.5 | 11.8 | 13.5 | 15.4 | 13.9 |
| Zfp27   | 3.2  | 3.3  | 3.4  | 3.8  | 2.9  | 3.4  | 3.6  | 3.6  | 2.8  | 3.1  | 3.6  | 3.1  |
| Zfp273  | 1.8  | 1.2  | 1.6  | 1.0  | 1.4  | 1.2  | 1.1  | 1.4  | 1.5  | 1.3  | 1.4  | 1.7  |
| Zfp275  | 10.1 | 9.2  | 10.3 | 9.8  | 11.0 | 9.7  | 10.1 | 10.0 | 9.6  | 10.4 | 10.8 | 10.8 |
| Zfp276  | 2.9  | 2.7  | 2.7  | 2.6  | 3.2  | 2.9  | 3.1  | 3.0  | 3.8  | 3.1  | 2.9  | 2.6  |
| Zfp277  | 10.2 | 10.9 | 10.6 | 8.4  | 9.9  | 10.2 | 9.6  | 9.9  | 8.9  | 10.6 | 10.1 | 9.9  |
| Zfp28   | 1.5  | 1.5  | 1.9  | 1.7  | 1.6  | 1.9  | 1.4  | 1.5  | 1.3  | 1.7  | 1.3  | 1.5  |
| Zfp280b | 3.6  | 4.5  | 3.9  | 3.1  | 3.2  | 3.6  | 4.0  | 3.9  | 4.4  | 4.0  | 4.7  | 3.3  |
| Zfp280c | 2.8  | 3.1  | 3.1  | 2.6  | 2.5  | 3.0  | 3.0  | 3.0  | 2.4  | 2.9  | 3.2  | 2.4  |
| Zfp280d | 3.9  | 4.8  | 5.0  | 4.2  | 4.1  | 4.2  | 4.2  | 5.3  | 4.6  | 5.1  | 5.3  | 5.0  |
| Zfp281  | 6.5  | 7.9  | 11.2 | 5.8  | 8.7  | 4.8  | 8.7  | 10.6 | 9.9  | 11.7 | 9.4  | 10.7 |
| Zfp282  | 2.5  | 2.2  | 2.9  | 2.8  | 2.4  | 2.2  | 2.4  | 3.1  | 3.1  | 2.5  | 2.5  | 2.4  |
| Zfp286  | 1.6  | 1.6  | 1.8  | 1.4  | 1.0  | 1.5  | 1.4  | 1.7  | 1.2  | 1.2  | 1.8  | 1.5  |
| Zfp287  | 1.8  | 1.8  | 2.2  | 1.8  | 1.7  | 2.6  | 1.9  | 1.9  | 1.8  | 1.6  | 2.0  | 2.0  |
| Zfp292  | 2.9  | 3.8  | 3.6  | 2.8  | 3.0  | 4.0  | 2.9  | 3.6  | 3.1  | 3.8  | 4.0  | 4.1  |
| Zfp296  | 1.1  | 1.2  | 0.8  | 1.1  | 1.2  | 1.5  | 0.9  | 0.5  | 0.4  | 0.4  | 0.8  | 0.7  |
| Zfp3    | 1.9  | 1.7  | 2.0  | 2.1  | 1.5  | 2.2  | 1.3  | 1.2  | 1.1  | 1.6  | 1.5  | 1.4  |
| Zfp30   | 1.8  | 1.8  | 2.0  | 1.8  | 1.1  | 2.1  | 1.2  | 1.3  | 1.5  | 1.6  | 1.4  | 1.2  |
| Zfp300  | 0.2  | 0.2  | 0.4  | 0.4  | 0.2  | 0.4  | 0.3  | 0.4  | 0.3  | 0.3  | 0.3  | 0.4  |
| Zfp316  | 2.5  | 2.1  | 2.0  | 1.8  | 1.7  | 1.8  | 1.8  | 1.9  | 1.7  | 1.8  | 2.2  | 2.0  |
| Zfp317  | 8.6  | 8.3  | 8.3  | 8.2  | 7.5  | 9.9  | 6.8  | 8.0  | 7.8  | 8.6  | 9.2  | 8.9  |
| Zfp318  | 3.5  | 3.9  | 4.5  | 3.7  | 3.2  | 3.2  | 3.7  | 3.7  | 3.5  | 3.6  | 3.9  | 3.9  |
| Zfp319  | 2.0  | 1.9  | 2.0  | 2.6  | 2.3  | 2.2  | 2.4  | 2.4  | 2.2  | 2.1  | 1.6  | 1.5  |
| Zfp322a | 6.1  | 6.4  | 7.0  | 5.7  | 5.9  | 6.5  | 5.3  | 6.3  | 5.8  | 6.6  | 7.2  | 7.2  |
| Zfp324  | 2.8  | 3.3  | 3.3  | 2.5  | 2.9  | 3.3  | 3.4  | 3.4  | 3.6  | 3.1  | 3.6  | 3.2  |
| Zfp326  | 3.5  | 4.0  | 4.7  | 4.5  | 3.9  | 3.5  | 5.3  | 4.3  | 3.5  | 4.7  | 4.6  | 4.4  |
| Zfp329  | 2.4  | 2.6  | 2.5  | 2.4  | 2.2  | 2.4  | 2.0  | 2.4  | 2.2  | 2.2  | 2.3  | 2.5  |
| Zfp330  | 25.9 | 21.5 | 20.6 | 21.1 | 21.7 | 22.0 | 20.2 | 16.9 | 19.0 | 23.4 | 21.4 | 23.5 |
| Zfp334  | 4.8  | 5.1  | 5.7  | 4.3  | 4.0  | 5.0  | 4.6  | 5.1  | 4.2  | 5.5  | 5.7  | 5.3  |
| Zfp335  | 3.0  | 3.5  | 3.0  | 3.5  | 3.3  | 2.9  | 4.3  | 3.0  | 4.2  | 3.3  | 3.5  | 3.1  |
| Zfp341  | 0.3  | 0.3  | 0.5  | 0.2  | 0.3  | 0.3  | 0.4  | 0.4  | 0.3  | 0.3  | 0.4  | 0.3  |
| Zfp345  | 0.1  | 0.0  | 0.1  | 0.0  | 0.0  | 0.1  | 0.1  | 0.1  | 0.1  | 0.1  | 0.1  | 0.0  |
| Zfp346  | 5.4  | 5.2  | 5.3  | 5.9  | 4.6  | 5.0  | 4.0  | 4.6  | 4.3  | 4.7  | 4.0  | 4.8  |
| Zfp35   | 5.4  | 5.5  | 5.4  | 5.1  | 5.1  | 5.2  | 5.0  | 5.2  | 5.1  | 5.1  | 5.6  | 5.2  |
| Zfp354a | 1.3  | 1.5  | 1.4  | 1.4  | 1.3  | 1.3  | 1.2  | 1.2  | 1.3  | 1.4  | 1.6  | 1.2  |
| Zfp354b | 0.9  | 1.3  | 1.4  | 1.4  | 1.1  | 1.3  | 1.1  | 1.0  | 0.9  | 1.2  | 1.2  | 1.3  |
| Zfp354c | 1.8  | 1.5  | 2.6  | 1.8  | 1.3  | 2.4  | 1.7  | 2.4  | 1.9  | 2.3  | 2.2  | 2.4  |
| Zfp358  | 6.0  | 5.4  | 6.4  | 6.6  | 4.8  | 8.7  | 6.0  | 6.9  | 5.4  | 7.0  | 7.0  | 5.4  |
| Zfp36   | 6.6  | 10.7 | 10.3 | 6.6  | 8.9  | 6.8  | 9.2  | 10.0 | 12.3 | 20.6 | 10.6 | 9.9  |
| Zfp362  | 0.9  | 1.2  | 1.3  | 1.1  | 1.4  | 1.3  | 1.2  | 1.0  | 1.1  | 1.1  | 1.3  | 0.9  |
| Zfp365  | 12.2 | 11.6 | 10.1 | 12.5 | 9.7  | 14.2 | 7.8  | 7.3  | 6.9  | 8.8  | 9.8  | 8.3  |
| Zfp367  | 5.0  | 6.4  | 8.6  | 6.9  | 7.6  | 7.7  | 7.9  | 4.9  | 6.7  | 4.3  | 7.1  | 6.3  |
| Zfp369  | 3.0  | 3.5  | 3.4  | 2.6  | 2.9  | 3.2  | 2.4  | 3.5  | 2.9  | 2.9  | 2.6  | 2.5  |
| Zfp3611 | 5.4  | 10.5 | 17.2 | 4.8  | 11.3 | 6.8  | 10.3 | 15.0 | 11.3 | 12.7 | 7.5  | 9.7  |
| Zfp3612 | 18.6 | 24.5 | 32.0 | 18.7 | 23.0 | 19.1 | 17.6 | 22.2 | 16.6 | 18.1 | 16.0 | 14.7 |
| Zfp37   | 5.4  | 3.7  | 4.0  | 5.3  | 3.0  | 3.5  | 3.5  | 3.4  | 3.3  | 5.2  | 5.8  | 5.6  |
| Zfp382  | 2.1  | 2.6  | 2.7  | 1.9  | 2.1  | 2.4  | 2.9  | 2.4  | 2.6  | 2.1  | 2.6  | 2.1  |

Online Table 1

|         |      |      |      |      |      |      |      |      |      |      |      |      |
|---------|------|------|------|------|------|------|------|------|------|------|------|------|
| Zfp383  | 1.3  | 1.2  | 1.3  | 0.8  | 1.0  | 1.4  | 0.8  | 1.7  | 1.2  | 1.3  | 1.3  | 1.3  |
| Zfp384  | 4.6  | 5.6  | 6.1  | 5.7  | 5.2  | 4.4  | 5.3  | 5.6  | 4.9  | 4.3  | 4.9  | 4.5  |
| Zfp385a | 1.5  | 2.6  | 2.5  | 1.5  | 2.3  | 1.9  | 2.4  | 2.5  | 2.1  | 2.5  | 2.3  | 1.4  |
| Zfp385b | 0.1  | 0.0  | 0.0  | 0.2  | 0.0  | 0.0  | 0.1  | 0.1  | 0.0  | 0.0  | 0.0  | 0.0  |
| Zfp385c | 3.4  | 3.8  | 3.2  | 3.7  | 3.6  | 4.0  | 3.6  | 3.8  | 3.9  | 3.3  | 4.0  | 3.3  |
| Zfp386  | 9.1  | 8.9  | 9.5  | 9.5  | 8.5  | 10.3 | 9.4  | 10.8 | 8.7  | 9.6  | 12.8 | 12.0 |
| Zfp389  | 0.5  | 0.3  | 0.3  | 0.1  | 0.3  | 0.3  | 0.3  | 0.2  | 0.1  | 0.2  | 0.6  | 0.3  |
| Zfp39   | 2.0  | 1.6  | 2.5  | 1.5  | 1.7  | 1.5  | 2.0  | 2.1  | 1.9  | 1.9  | 2.2  | 2.2  |
| Zfp395  | 0.0  | 0.1  | 0.4  | 0.0  | 0.1  | 0.1  | 0.1  | 0.2  | 0.2  | 0.5  | 0.2  | 0.2  |
| Zfp397  | 5.8  | 6.8  | 6.6  | 5.8  | 5.8  | 6.4  | 4.5  | 5.6  | 6.2  | 5.7  | 6.7  | 6.2  |
| Zfp398  | 1.4  | 1.3  | 1.3  | 1.1  | 1.1  | 1.9  | 1.0  | 1.6  | 1.1  | 1.4  | 1.8  | 1.3  |
| Zfp40   | 2.0  | 2.4  | 2.3  | 2.5  | 2.5  | 2.3  | 2.0  | 2.2  | 2.1  | 2.3  | 2.9  | 2.7  |
| Zfp407  | 3.3  | 3.3  | 3.0  | 3.4  | 3.6  | 3.1  | 4.0  | 3.9  | 3.6  | 3.8  | 3.7  | 3.7  |
| Zfp408  | 2.5  | 2.4  | 2.2  | 2.7  | 2.3  | 2.6  | 2.7  | 2.6  | 2.6  | 2.4  | 2.7  | 2.5  |
| Zfp41   | 1.2  | 1.7  | 1.7  | 1.0  | 1.1  | 1.4  | 1.3  | 1.5  | 1.3  | 1.0  | 1.2  | 0.9  |
| Zfp410  | 11.9 | 12.7 | 11.0 | 9.8  | 11.0 | 11.6 | 9.9  | 10.5 | 11.4 | 11.7 | 11.3 | 12.1 |
| Zfp414  | 5.5  | 7.3  | 6.8  | 8.3  | 6.2  | 7.5  | 9.1  | 9.4  | 8.5  | 5.7  | 8.4  | 7.3  |
| Zfp418  | 0.6  | 0.9  | 0.9  | 0.8  | 0.7  | 0.8  | 0.9  | 0.8  | 0.8  | 0.8  | 0.9  | 0.6  |
| Zfp420  | 1.6  | 1.5  | 1.4  | 1.6  | 0.9  | 1.5  | 0.8  | 1.0  | 1.0  | 1.2  | 1.5  | 1.3  |
| Zfp422  | 4.1  | 4.3  | 5.0  | 4.2  | 4.1  | 4.2  | 4.3  | 5.2  | 4.2  | 4.6  | 5.2  | 5.1  |
| Zfp423  | 0.4  | 0.5  | 1.0  | 0.4  | 0.5  | 0.4  | 0.4  | 1.0  | 0.6  | 0.6  | 0.6  | 0.6  |
| Zfp426  | 9.0  | 8.1  | 6.7  | 8.1  | 7.6  | 8.2  | 6.3  | 6.8  | 6.7  | 8.2  | 7.5  | 7.6  |
| Zfp428  | 1.5  | 1.6  | 1.3  | 1.1  | 1.4  | 1.1  | 1.2  | 1.3  | 1.2  | 2.2  | 0.8  | 1.6  |
| Zfp429  | 1.9  | 2.0  | 1.9  | 1.3  | 2.6  | 2.1  | 1.6  | 1.7  | 1.9  | 2.1  | 2.2  | 1.9  |
| Zfp433  | 1.8  | 1.8  | 1.6  | 1.7  | 1.9  | 2.0  | 1.3  | 2.1  | 2.3  | 2.3  | 2.1  | 2.1  |
| Zfp438  | 1.5  | 1.5  | 1.4  | 2.0  | 1.5  | 1.7  | 1.2  | 1.3  | 1.2  | 1.3  | 1.4  | 1.4  |
| Zfp442  | 2.8  | 3.5  | 4.0  | 2.8  | 3.1  | 3.4  | 2.5  | 3.2  | 2.6  | 3.9  | 3.2  | 4.1  |
| Zfp444  | 1.5  | 1.4  | 1.2  | 1.6  | 1.4  | 1.7  | 1.4  | 1.5  | 1.5  | 1.8  | 1.4  | 1.3  |
| Zfp445  | 9.5  | 10.4 | 9.4  | 8.5  | 9.7  | 9.2  | 7.9  | 8.6  | 10.3 | 9.7  | 9.6  | 11.0 |
| Zfp446  | 0.8  | 0.6  | 0.6  | 0.6  | 0.6  | 0.6  | 0.7  | 0.6  | 0.7  | 0.7  | 0.6  | 0.5  |
| Zfp449  | 4.5  | 5.2  | 5.2  | 4.7  | 4.7  | 5.0  | 5.3  | 5.0  | 5.3  | 5.5  | 6.7  | 6.1  |
| Zfp451  | 5.3  | 7.4  | 8.6  | 5.0  | 7.1  | 5.9  | 6.7  | 7.4  | 6.8  | 6.3  | 7.2  | 8.1  |
| Zfp454  | 0.7  | 0.8  | 0.9  | 1.0  | 0.4  | 0.9  | 0.7  | 0.6  | 0.4  | 0.4  | 0.7  | 0.9  |
| Zfp455  | 0.8  | 0.8  | 0.9  | 0.7  | 0.9  | 0.7  | 0.5  | 0.7  | 0.7  | 0.6  | 0.6  | 1.1  |
| Zfp456  | 0.8  | 0.9  | 0.9  | 0.9  | 1.2  | 0.7  | 0.6  | 0.6  | 0.8  | 1.1  | 0.7  | 0.8  |
| Zfp457  | 0.0  | 0.1  | 0.1  | 0.0  | 0.1  | 0.0  | 0.0  | 0.0  | 0.0  | 0.1  | 0.0  | 0.0  |
| Zfp458  | 0.9  | 1.1  | 1.1  | 0.9  | 1.0  | 1.1  | 1.1  | 1.1  | 0.7  | 0.9  | 1.1  | 0.9  |
| Zfp459  | 0.2  | 0.1  | 0.1  | 0.3  | 0.2  | 0.3  | 0.2  | 0.1  | 0.1  | 0.1  | 0.1  | 0.1  |
| Zfp46   | 7.5  | 8.1  | 9.8  | 7.9  | 7.7  | 7.6  | 8.1  | 9.8  | 8.4  | 7.4  | 8.1  | 8.1  |
| Zfp462  | 1.9  | 1.7  | 1.7  | 2.0  | 1.4  | 1.9  | 2.0  | 2.0  | 1.7  | 2.2  | 2.9  | 1.6  |
| Zfp467  | 0.7  | 1.5  | 2.3  | 0.8  | 1.7  | 1.1  | 0.9  | 1.4  | 1.8  | 1.5  | 0.9  | 1.3  |
| Zfp472  | 1.2  | 1.1  | 1.4  | 1.7  | 2.1  | 1.1  | 1.3  | 1.7  | 1.3  | 1.5  | 1.4  | 1.6  |
| Zfp473  | 0.1  | 0.2  | 0.3  | 0.1  | 0.3  | 0.2  | 0.2  | 0.2  | 0.2  | 0.2  | 0.2  | 0.2  |
| Zfp474  | 0.2  | 0.1  | 0.1  | 0.1  | 0.2  | 0.1  | 0.2  | 0.0  | 0.2  | 0.3  | 0.2  | 0.2  |
| Zfp488  | 7.1  | 10.0 | 7.9  | 5.8  | 8.6  | 6.7  | 8.3  | 6.2  | 5.8  | 7.1  | 6.5  | 5.5  |
| Zfp493  | 0.6  | 0.4  | 0.5  | 0.6  | 0.4  | 0.7  | 0.4  | 0.4  | 0.5  | 0.6  | 0.5  | 0.7  |
| Zfp503  | 1.1  | 1.3  | 2.1  | 1.0  | 1.3  | 1.3  | 1.4  | 1.7  | 2.0  | 4.3  | 3.1  | 2.5  |
| Zfp507  | 6.0  | 6.1  | 6.9  | 6.0  | 5.2  | 6.3  | 5.6  | 6.5  | 6.1  | 6.1  | 6.6  | 6.2  |
| Zfp51   | 4.1  | 3.6  | 3.9  | 4.0  | 3.4  | 5.0  | 3.1  | 3.6  | 3.5  | 4.4  | 4.4  | 4.2  |
| Zfp511  | 7.0  | 7.0  | 6.7  | 7.9  | 7.3  | 7.5  | 7.7  | 6.6  | 7.5  | 7.4  | 9.1  | 8.2  |
| Zfp512  | 7.2  | 7.6  | 7.7  | 7.4  | 7.0  | 8.5  | 5.3  | 7.2  | 6.1  | 6.5  | 6.2  | 6.6  |
| Zfp513  | 3.6  | 3.1  | 4.5  | 3.6  | 3.6  | 3.5  | 3.7  | 3.9  | 3.8  | 3.3  | 3.6  | 3.5  |
| Zfp516  | 4.8  | 5.5  | 4.9  | 3.9  | 4.6  | 4.8  | 4.1  | 5.2  | 5.0  | 6.3  | 5.3  | 5.0  |
| Zfp518a | 2.6  | 2.8  | 3.2  | 2.9  | 2.9  | 3.2  | 2.4  | 3.0  | 2.5  | 2.9  | 3.4  | 3.1  |
| Zfp518b | 4.7  | 4.2  | 4.7  | 4.0  | 3.8  | 4.6  | 4.1  | 4.4  | 4.1  | 3.6  | 4.3  | 3.9  |
| Zfp52   | 4.1  | 4.5  | 4.9  | 3.7  | 4.5  | 4.7  | 5.1  | 4.2  | 4.7  | 7.3  | 5.7  | 6.3  |
| Zfp521  | 10.7 | 14.2 | 18.0 | 11.1 | 10.1 | 11.6 | 14.4 | 21.9 | 15.4 | 8.1  | 12.5 | 11.1 |

Online Table 1



|        |      |      |      |      |      |      |      |      |      |      |      |      |
|--------|------|------|------|------|------|------|------|------|------|------|------|------|
| Zfp523 | 5.2  | 5.7  | 5.5  | 4.8  | 4.9  | 5.7  | 5.9  | 5.5  | 5.6  | 4.8  | 4.9  | 5.1  |
| Zfp524 | 3.9  | 4.3  | 4.0  | 3.6  | 2.9  | 3.1  | 4.4  | 5.9  | 3.6  | 4.6  | 5.5  | 4.8  |
| Zfp526 | 2.8  | 3.6  | 3.8  | 3.6  | 3.0  | 3.3  | 4.3  | 4.1  | 3.6  | 2.9  | 4.0  | 3.5  |
| Zfp53  | 2.7  | 2.7  | 2.6  | 2.1  | 2.7  | 2.5  | 2.5  | 2.3  | 3.1  | 3.3  | 3.2  | 3.9  |
| Zfp532 | 4.3  | 5.2  | 6.5  | 3.0  | 3.5  | 3.8  | 4.8  | 5.9  | 5.4  | 6.6  | 5.9  | 5.6  |
| Zfp534 | 0.0  | 0.0  | 0.0  | 0.0  | 0.1  | 0.1  | 0.0  | 0.1  | 0.0  | 0.0  | 0.0  | 0.0  |
| Zfp536 | 0.0  | 0.0  | 0.0  | 0.0  | 0.0  | 0.0  | 0.0  | 0.0  | 0.0  | 0.0  | 0.0  | 0.0  |
| Zfp54  | 1.9  | 3.0  | 3.0  | 1.5  | 2.4  | 2.3  | 1.9  | 1.9  | 2.1  | 2.3  | 1.9  | 2.4  |
| Zfp541 | 0.0  | 0.0  | 0.0  | 0.0  | 0.0  | 0.0  | 0.0  | 0.0  | 0.0  | 0.0  | 0.0  | 0.0  |
| Zfp551 | 1.5  | 1.6  | 1.2  | 1.6  | 1.1  | 1.9  | 1.3  | 1.4  | 1.6  | 1.9  | 1.6  | 1.8  |
| Zfp553 | 3.7  | 3.8  | 4.0  | 3.5  | 3.2  | 3.8  | 3.2  | 3.7  | 3.2  | 4.4  | 4.1  | 3.6  |
| Zfp558 | 0.9  | 0.8  | 1.0  | 0.7  | 0.8  | 0.9  | 0.6  | 0.7  | 0.6  | 0.8  | 0.9  | 0.8  |
| Zfp560 | 1.4  | 1.4  | 1.2  | 1.4  | 1.3  | 1.6  | 1.3  | 1.4  | 1.4  | 1.3  | 1.7  | 1.2  |
| Zfp563 | 0.8  | 0.8  | 0.9  | 0.9  | 0.9  | 1.0  | 0.7  | 0.9  | 1.0  | 1.0  | 1.0  | 1.1  |
| Zfp566 | 0.9  | 0.7  | 0.8  | 1.4  | 0.9  | 1.1  | 0.5  | 0.7  | 0.8  | 0.9  | 1.4  | 1.0  |
| Zfp568 | 2.8  | 2.5  | 2.1  | 2.7  | 2.6  | 2.1  | 2.8  | 2.2  | 3.1  | 2.8  | 2.9  | 2.3  |
| Zfp57  | 4.5  | 3.1  | 2.6  | 2.3  | 2.2  | 2.4  | 1.9  | 3.2  | 3.0  | 4.8  | 3.0  | 2.5  |
| Zfp574 | 2.1  | 2.7  | 2.3  | 1.8  | 2.6  | 2.3  | 3.0  | 3.0  | 3.0  | 2.8  | 2.7  | 2.1  |
| Zfp575 | 0.4  | 0.4  | 0.4  | 0.5  | 0.5  | 0.4  | 0.4  | 0.6  | 0.4  | 0.2  | 0.4  | 0.2  |
| Zfp579 | 4.9  | 7.1  | 5.0  | 2.8  | 3.1  | 3.2  | 4.5  | 5.2  | 4.2  | 7.8  | 6.9  | 4.0  |
| Zfp58  | 2.3  | 2.1  | 2.3  | 2.3  | 2.2  | 2.0  | 1.7  | 2.1  | 2.2  | 2.4  | 1.8  | 2.0  |
| Zfp580 | 0.8  | 0.5  | 1.2  | 1.1  | 0.8  | 0.9  | 0.6  | 1.1  | 1.1  | 1.0  | 1.3  | 0.5  |
| Zfp583 | 1.6  | 1.6  | 2.4  | 2.0  | 1.3  | 2.1  | 1.7  | 1.7  | 1.5  | 1.6  | 2.0  | 1.5  |
| Zfp59  | 2.3  | 2.2  | 2.3  | 1.8  | 1.9  | 1.9  | 1.5  | 1.7  | 1.6  | 2.3  | 2.0  | 2.1  |
| Zfp592 | 3.2  | 3.7  | 4.1  | 2.9  | 3.6  | 3.2  | 3.9  | 4.2  | 3.5  | 2.9  | 3.1  | 2.9  |
| Zfp593 | 3.4  | 3.1  | 2.3  | 2.7  | 3.6  | 4.0  | 3.7  | 3.2  | 3.7  | 3.6  | 4.2  | 3.0  |
| Zfp595 | 1.3  | 1.7  | 1.7  | 1.4  | 1.6  | 1.1  | 1.2  | 1.2  | 1.3  | 1.6  | 1.6  | 1.7  |
| Zfp597 | 2.8  | 3.2  | 3.3  | 2.4  | 3.0  | 2.4  | 2.7  | 2.6  | 3.1  | 3.5  | 3.1  | 3.3  |
| Zfp598 | 6.4  | 7.0  | 6.4  | 6.3  | 6.6  | 7.3  | 7.8  | 7.6  | 8.1  | 6.7  | 6.9  | 6.4  |
| Zfp599 | 0.9  | 0.6  | 0.7  | 0.5  | 0.5  | 0.6  | 0.8  | 0.4  | 0.7  | 0.7  | 1.2  | 0.8  |
| Zfp60  | 4.0  | 4.5  | 4.6  | 4.2  | 3.7  | 4.3  | 3.7  | 5.1  | 4.6  | 5.1  | 5.2  | 5.2  |
| Zfp600 | 0.2  | 0.2  | 0.1  | 0.2  | 0.1  | 0.2  | 0.1  | 0.1  | 0.1  | 0.1  | 0.1  | 0.1  |
| Zfp605 | 2.7  | 2.3  | 2.7  | 1.9  | 1.6  | 2.6  | 1.7  | 2.3  | 1.9  | 2.2  | 2.9  | 2.8  |
| Zfp606 | 2.0  | 2.0  | 2.4  | 1.3  | 2.1  | 2.4  | 1.9  | 2.1  | 2.4  | 2.5  | 2.4  | 2.4  |
| Zfp607 | 1.6  | 1.8  | 1.7  | 1.2  | 2.0  | 1.4  | 1.4  | 1.8  | 1.7  | 1.7  | 1.6  | 1.7  |
| Zfp608 | 1.1  | 1.5  | 2.7  | 1.1  | 1.6  | 0.9  | 1.6  | 2.4  | 2.3  | 2.0  | 2.0  | 2.3  |
| Zfp609 | 1.3  | 1.8  | 1.6  | 1.2  | 1.4  | 1.3  | 1.5  | 1.4  | 1.4  | 1.2  | 1.4  | 1.3  |
| Zfp61  | 2.5  | 2.7  | 3.5  | 2.5  | 2.6  | 2.8  | 2.3  | 2.9  | 2.8  | 3.2  | 2.9  | 2.8  |
| Zfp612 | 0.6  | 0.7  | 0.6  | 0.5  | 0.3  | 1.0  | 0.4  | 0.3  | 0.3  | 1.0  | 0.8  | 0.5  |
| Zfp617 | 7.4  | 6.3  | 7.1  | 5.8  | 6.2  | 6.4  | 5.7  | 6.9  | 6.0  | 6.9  | 7.7  | 7.4  |
| Zfp618 | 0.6  | 0.6  | 0.6  | 0.9  | 1.4  | 0.7  | 0.8  | 0.5  | 0.7  | 0.5  | 0.6  | 0.8  |
| Zfp619 | 0.5  | 0.4  | 0.4  | 0.5  | 0.5  | 0.3  | 0.6  | 0.6  | 0.5  | 0.4  | 0.3  | 0.5  |
| Zfp62  | 8.6  | 10.0 | 11.7 | 9.0  | 8.2  | 9.4  | 8.0  | 10.3 | 9.3  | 10.6 | 11.3 | 11.1 |
| Zfp622 | 10.3 | 9.0  | 8.6  | 9.9  | 8.5  | 9.0  | 9.3  | 10.1 | 9.2  | 12.5 | 10.1 | 11.5 |
| Zfp623 | 8.1  | 8.9  | 8.8  | 8.4  | 7.3  | 9.0  | 8.0  | 8.5  | 7.9  | 8.9  | 8.1  | 8.9  |
| Zfp628 | 0.4  | 0.3  | 0.5  | 0.4  | 0.4  | 0.4  | 0.4  | 0.5  | 0.4  | 0.4  | 0.4  | 0.3  |
| Zfp629 | 2.9  | 3.5  | 3.7  | 2.8  | 2.8  | 3.4  | 3.3  | 3.5  | 3.3  | 3.2  | 2.9  | 3.3  |
| Zfp637 | 21.5 | 18.0 | 17.1 | 16.6 | 15.4 | 16.9 | 16.8 | 21.1 | 19.8 | 21.2 | 21.5 | 18.9 |
| Zfp639 | 10.4 | 11.2 | 9.7  | 12.8 | 10.8 | 11.2 | 8.6  | 10.5 | 11.0 | 9.7  | 12.1 | 11.8 |
| Zfp64  | 6.3  | 6.3  | 5.5  | 7.3  | 6.0  | 6.0  | 6.9  | 6.6  | 5.8  | 5.8  | 6.6  | 5.7  |
| Zfp641 | 0.8  | 0.8  | 0.8  | 1.0  | 0.6  | 0.9  | 0.7  | 0.7  | 0.7  | 0.5  | 0.6  | 0.7  |
| Zfp644 | 11.5 | 11.2 | 11.1 | 11.8 | 10.3 | 11.4 | 11.4 | 12.0 | 12.7 | 12.4 | 15.2 | 13.9 |
| Zfp646 | 5.4  | 5.9  | 6.4  | 5.9  | 5.3  | 6.0  | 6.2  | 6.5  | 5.2  | 4.9  | 5.2  | 6.1  |
| Zfp647 | 1.2  | 1.2  | 1.3  | 1.2  | 1.0  | 1.2  | 1.1  | 1.5  | 1.2  | 1.4  | 1.7  | 1.0  |
| Zfp651 | 6.7  | 4.9  | 4.8  | 5.6  | 4.1  | 6.2  | 5.0  | 5.0  | 4.9  | 6.3  | 5.4  | 5.1  |
| Zfp652 | 16.0 | 14.8 | 14.1 | 21.6 | 14.4 | 19.4 | 14.5 | 12.5 | 10.6 | 11.4 | 14.0 | 13.4 |
| Zfp653 | 1.2  | 1.2  | 1.0  | 1.5  | 1.3  | 1.5  | 1.5  | 1.7  | 1.4  | 1.1  | 1.4  | 1.2  |

Online Table 1

|           |      |      |      |      |      |      |      |      |      |      |      |      |
|-----------|------|------|------|------|------|------|------|------|------|------|------|------|
| Zfp654    | 0.9  | 1.4  | 1.8  | 1.2  | 1.5  | 1.1  | 1.1  | 1.3  | 1.5  | 1.9  | 1.7  | 2.0  |
| Zfp655    | 13.5 | 12.7 | 10.7 | 12.1 | 11.6 | 13.2 | 11.4 | 10.6 | 11.3 | 13.8 | 12.5 | 13.8 |
| Zfp658    | 1.0  | 0.9  | 1.1  | 0.8  | 0.8  | 0.7  | 0.9  | 1.2  | 0.9  | 1.1  | 1.0  | 1.1  |
| Zfp661    | 1.2  | 1.3  | 1.4  | 1.3  | 1.3  | 1.4  | 1.4  | 1.3  | 1.0  | 0.9  | 1.5  | 1.1  |
| Zfp664    | 16.0 | 15.9 | 14.7 | 17.9 | 14.8 | 18.7 | 13.7 | 13.8 | 13.0 | 14.9 | 15.8 | 13.5 |
| Zfp667    | 1.0  | 1.2  | 1.0  | 0.8  | 0.9  | 1.4  | 0.9  | 1.3  | 1.1  | 1.2  | 0.9  | 1.0  |
| Zfp668    | 1.6  | 1.7  | 1.8  | 1.7  | 1.7  | 1.9  | 2.2  | 2.0  | 2.1  | 1.8  | 1.9  | 1.8  |
| Zfp672    | 7.6  | 8.3  | 9.1  | 6.7  | 6.8  | 7.7  | 6.0  | 7.2  | 9.4  | 8.1  | 7.0  | 6.1  |
| Zfp677    | 2.5  | 2.9  | 3.0  | 2.8  | 2.7  | 3.3  | 1.9  | 2.6  | 2.2  | 3.4  | 3.5  | 3.7  |
| Zfp68     | 9.8  | 10.4 | 11.6 | 9.3  | 8.7  | 10.1 | 8.5  | 11.0 | 10.8 | 10.0 | 10.7 | 12.0 |
| Zfp687    | 2.7  | 3.1  | 2.7  | 2.4  | 2.6  | 2.7  | 2.9  | 3.1  | 2.5  | 2.5  | 2.6  | 2.1  |
| Zfp688    | 6.6  | 6.5  | 6.8  | 6.3  | 5.6  | 7.1  | 4.7  | 5.3  | 6.4  | 6.1  | 6.8  | 6.0  |
| Zfp689    | 1.1  | 1.0  | 1.1  | 1.0  | 1.1  | 1.1  | 1.5  | 1.3  | 1.4  | 1.0  | 1.1  | 0.7  |
| Zfp69     | 0.3  | 0.2  | 0.4  | 0.2  | 0.3  | 0.4  | 0.3  | 0.4  | 0.2  | 0.2  | 0.2  | 0.3  |
| Zfp691    | 1.6  | 1.5  | 1.4  | 2.1  | 0.9  | 1.6  | 2.0  | 1.5  | 1.6  | 1.8  | 1.9  | 1.4  |
| Zfp692    | 2.8  | 3.2  | 3.2  | 3.1  | 2.5  | 3.1  | 2.9  | 2.4  | 3.1  | 2.2  | 2.4  | 2.2  |
| Zfp697    | 3.6  | 4.1  | 4.0  | 3.8  | 3.8  | 2.7  | 4.2  | 3.3  | 3.5  | 6.0  | 5.3  | 5.6  |
| Zfp7      | 1.7  | 1.1  | 1.7  | 2.2  | 1.9  | 1.7  | 2.3  | 1.6  | 1.8  | 2.3  | 2.4  | 1.8  |
| Zfp703    | 0.3  | 0.3  | 0.2  | 0.5  | 0.6  | 0.5  | 0.4  | 0.5  | 0.4  | 0.5  | 0.3  | 0.1  |
| Zfp704    | 2.8  | 3.1  | 3.1  | 2.6  | 2.7  | 2.5  | 2.5  | 2.2  | 2.1  | 2.5  | 2.4  | 2.4  |
| Zfp706    | 8.3  | 8.9  | 8.1  | 8.0  | 8.6  | 8.1  | 8.1  | 9.5  | 9.2  | 11.4 | 10.1 | 9.8  |
| Zfp707    | 1.2  | 1.4  | 1.2  | 1.1  | 1.2  | 1.3  | 0.8  | 1.3  | 1.3  | 1.4  | 1.3  | 1.1  |
| Zfp708    | 0.9  | 1.0  | 1.2  | 0.8  | 1.3  | 1.5  | 1.1  | 1.1  | 1.2  | 1.4  | 1.5  | 1.5  |
| Zfp709    | 2.0  | 2.4  | 2.3  | 2.4  | 2.2  | 2.3  | 1.6  | 2.2  | 2.2  | 2.6  | 2.2  | 2.8  |
| Zfp710    | 2.9  | 2.6  | 2.9  | 4.7  | 5.6  | 2.6  | 3.4  | 2.6  | 3.0  | 2.6  | 2.8  | 2.6  |
| Zfp712    | 0.7  | 0.5  | 0.7  | 0.6  | 0.8  | 0.8  | 0.6  | 0.6  | 0.8  | 0.7  | 0.8  | 1.0  |
| Zfp715    | 5.9  | 6.1  | 5.6  | 5.4  | 6.9  | 6.0  | 5.8  | 5.0  | 5.4  | 5.7  | 5.6  | 5.9  |
| Zfp719    | 3.8  | 3.5  | 3.5  | 3.3  | 3.6  | 3.7  | 3.2  | 3.7  | 3.9  | 4.0  | 3.9  | 3.7  |
| Zfp71-rs1 | 3.3  | 3.9  | 4.0  | 3.4  | 3.5  | 4.0  | 2.6  | 3.6  | 3.2  | 3.9  | 3.7  | 3.9  |
| Zfp72     | 1.3  | 1.3  | 1.7  | 1.6  | 1.5  | 1.7  | 1.5  | 1.5  | 1.4  | 1.5  | 1.5  | 1.7  |
| Zfp738    | 2.8  | 2.6  | 3.1  | 2.9  | 2.9  | 3.2  | 2.2  | 2.7  | 2.9  | 3.3  | 3.3  | 3.1  |
| Zfp74     | 2.9  | 3.1  | 3.3  | 2.7  | 2.4  | 3.5  | 2.1  | 3.0  | 2.9  | 2.3  | 2.8  | 2.9  |
| Zfp740    | 11.2 | 11.9 | 10.2 | 9.9  | 10.5 | 10.8 | 10.3 | 9.3  | 11.7 | 10.7 | 10.2 | 10.8 |
| Zfp746    | 4.8  | 5.4  | 4.9  | 5.2  | 5.0  | 5.4  | 5.2  | 5.2  | 5.4  | 5.4  | 5.7  | 4.9  |
| Zfp747    | 1.6  | 1.6  | 1.9  | 1.9  | 2.0  | 1.7  | 2.1  | 2.0  | 1.9  | 2.0  | 1.8  | 2.2  |
| Zfp748    | 2.7  | 2.6  | 3.7  | 3.1  | 2.7  | 3.9  | 2.8  | 3.2  | 3.2  | 3.1  | 4.2  | 2.9  |
| Zfp750    | 0.1  | 0.1  | 0.1  | 0.0  | 0.1  | 0.0  | 0.2  | 0.1  | 0.0  | 0.1  | 0.1  | 0.0  |
| Zfp758    | 1.4  | 3.0  | 4.0  | 2.5  | 3.1  | 2.9  | 2.4  | 3.1  | 3.5  | 3.9  | 4.4  | 4.5  |
| Zfp759    | 1.7  | 1.7  | 2.2  | 1.4  | 1.8  | 1.8  | 1.2  | 1.7  | 1.5  | 1.6  | 1.9  | 2.1  |
| Zfp760    | 2.5  | 2.9  | 2.6  | 2.1  | 2.6  | 2.9  | 1.9  | 2.2  | 2.6  | 2.9  | 3.1  | 2.6  |
| Zfp763    | 1.2  | 1.1  | 1.4  | 0.9  | 1.0  | 1.4  | 1.0  | 1.2  | 1.6  | 1.7  | 1.4  | 2.0  |
| Zfp764    | 2.1  | 2.5  | 3.2  | 2.9  | 2.9  | 2.7  | 3.3  | 3.2  | 2.9  | 2.9  | 2.9  | 3.4  |
| Zfp768    | 4.7  | 4.6  | 5.4  | 5.5  | 5.3  | 6.0  | 6.1  | 5.7  | 6.5  | 5.3  | 5.2  | 5.6  |
| Zfp770    | 1.7  | 2.1  | 2.3  | 2.4  | 2.4  | 2.9  | 1.8  | 1.8  | 2.1  | 2.5  | 2.4  | 1.9  |
| Zfp771    | 13.8 | 9.4  | 9.7  | 7.0  | 7.9  | 7.0  | 10.7 | 14.0 | 12.9 | 16.3 | 12.8 | 14.2 |
| Zfp772    | 1.6  | 2.0  | 1.9  | 1.2  | 1.9  | 1.9  | 1.6  | 1.8  | 1.7  | 1.5  | 1.5  | 1.7  |
| Zfp773    | 0.0  | 0.0  | 0.1  | 0.2  | 0.1  | 0.1  | 0.0  | 0.1  | 0.0  | 0.0  | 0.1  | 0.1  |
| Zfp775    | 1.6  | 1.8  | 1.5  | 1.3  | 0.9  | 1.5  | 1.3  | 1.2  | 1.2  | 1.0  | 1.2  | 1.2  |
| Zfp777    | 4.1  | 4.4  | 4.5  | 4.4  | 4.2  | 4.5  | 5.3  | 5.2  | 5.1  | 4.5  | 4.9  | 5.3  |
| Zfp78     | 0.5  | 0.6  | 0.8  | 0.7  | 0.6  | 0.6  | 0.6  | 0.6  | 0.6  | 0.7  | 0.8  | 0.9  |
| Zfp780b   | 2.9  | 3.6  | 3.0  | 3.0  | 3.1  | 3.0  | 2.2  | 2.7  | 2.6  | 2.8  | 2.8  | 3.1  |
| Zfp781    | 2.2  | 2.4  | 2.4  | 2.4  | 2.0  | 2.2  | 1.7  | 2.2  | 1.9  | 2.6  | 2.2  | 2.2  |
| Zfp783    | 0.6  | 0.5  | 0.6  | 0.2  | 0.3  | 0.4  | 0.3  | 0.7  | 0.4  | 0.4  | 0.3  | 0.3  |
| Zfp784    | 0.6  | 0.8  | 0.8  | 0.8  | 0.7  | 0.9  | 0.7  | 1.0  | 0.6  | 0.9  | 1.2  | 0.8  |
| Zfp786    | 0.2  | 0.2  | 0.2  | 0.3  | 0.2  | 0.2  | 0.2  | 0.2  | 0.2  | 0.2  | 0.3  | 0.2  |
| Zfp787    | 3.9  | 3.4  | 3.0  | 3.5  | 3.8  | 3.7  | 3.5  | 3.3  | 3.3  | 3.7  | 2.9  | 3.1  |
| Zfp788    | 2.0  | 1.6  | 1.8  | 1.5  | 1.6  | 2.0  | 1.6  | 1.6  | 1.6  | 2.0  | 1.8  | 2.1  |

Online Table 1

|           |      |      |      |      |      |      |      |      |      |      |      |      |
|-----------|------|------|------|------|------|------|------|------|------|------|------|------|
| Zfp790    | 4.8  | 5.2  | 5.0  | 5.7  | 4.3  | 4.9  | 4.1  | 4.2  | 4.6  | 5.0  | 5.4  | 5.7  |
| Zfp791    | 0.8  | 0.7  | 0.9  | 0.7  | 0.5  | 0.8  | 0.6  | 0.6  | 0.6  | 0.5  | 0.5  | 0.7  |
| Zfp799    | 2.8  | 2.9  | 3.7  | 2.5  | 2.7  | 3.0  | 2.7  | 3.6  | 3.2  | 3.5  | 3.6  | 3.1  |
| Zfp800    | 3.6  | 3.7  | 3.5  | 4.1  | 3.4  | 3.8  | 3.4  | 3.3  | 3.1  | 3.5  | 4.3  | 3.7  |
| Zfp804b   | 0.0  | 0.0  | 0.0  | 0.0  | 0.0  | 0.0  | 0.0  | 0.0  | 0.0  | 0.0  | 0.0  | 0.0  |
| Zfp808    | 1.1  | 1.7  | 2.2  | 1.4  | 1.6  | 1.8  | 1.2  | 1.5  | 1.4  | 1.5  | 2.4  | 1.7  |
| Zfp809    | 18.6 | 13.4 | 14.4 | 12.1 | 13.9 | 11.5 | 18.1 | 12.3 | 22.5 | 20.7 | 22.3 | 27.9 |
| Zfp81     | 1.9  | 3.1  | 3.0  | 2.4  | 2.9  | 2.3  | 2.2  | 2.7  | 2.8  | 3.0  | 3.1  | 2.7  |
| Zfp810    | 4.1  | 4.1  | 4.7  | 3.3  | 3.5  | 2.7  | 3.7  | 4.8  | 4.8  | 4.4  | 5.0  | 5.3  |
| Zfp811    | 0.2  | 0.4  | 0.2  | 0.0  | 0.6  | 0.1  | 0.2  | 0.1  | 0.2  | 0.2  | 0.3  | 0.2  |
| Zfp82     | 1.7  | 2.4  | 2.0  | 2.0  | 2.2  | 2.0  | 1.4  | 2.2  | 2.2  | 1.4  | 1.8  | 1.7  |
| Zfp820    | 1.0  | 1.9  | 2.4  | 1.8  | 1.6  | 2.3  | 1.6  | 2.0  | 1.9  | 1.5  | 2.4  | 2.6  |
| Zfp821    | 2.2  | 2.9  | 3.2  | 2.9  | 2.5  | 2.7  | 2.6  | 3.4  | 3.1  | 2.7  | 2.5  | 2.9  |
| Zfp825    | 6.7  | 9.2  | 9.1  | 6.2  | 7.0  | 7.4  | 5.9  | 7.7  | 6.2  | 7.2  | 6.8  | 7.0  |
| Zfp827    | 0.4  | 0.2  | 0.4  | 0.4  | 0.3  | 0.4  | 0.4  | 0.7  | 0.5  | 0.8  | 0.8  | 0.5  |
| Zfp828    | 7.7  | 6.6  | 7.8  | 8.2  | 7.0  | 7.4  | 7.7  | 8.0  | 6.8  | 8.1  | 8.7  | 7.7  |
| Zfp830    | 3.9  | 4.6  | 4.8  | 4.7  | 4.1  | 4.9  | 4.2  | 4.1  | 3.9  | 4.6  | 4.9  | 5.1  |
| Zfp839    | 2.8  | 3.0  | 2.9  | 2.5  | 2.7  | 2.2  | 3.0  | 2.3  | 2.4  | 2.5  | 2.3  | 2.6  |
| Zfp84     | 2.6  | 2.8  | 3.2  | 3.0  | 3.0  | 2.3  | 3.1  | 3.4  | 3.1  | 3.8  | 3.7  | 3.6  |
| Zfp846    | 2.0  | 1.8  | 1.7  | 2.2  | 1.6  | 2.1  | 1.7  | 1.9  | 1.8  | 1.7  | 1.8  | 2.2  |
| Zfp85-rs1 | 1.2  | 1.1  | 1.8  | 1.0  | 1.1  | 1.7  | 1.4  | 1.5  | 1.2  | 1.2  | 1.0  | 1.8  |
| Zfp862    | 0.8  | 0.8  | 0.9  | 0.6  | 0.7  | 0.6  | 0.7  | 0.9  | 0.8  | 0.6  | 0.6  | 0.8  |
| Zfp865    | 1.3  | 1.5  | 2.0  | 1.9  | 1.3  | 1.8  | 1.9  | 2.0  | 1.8  | 1.4  | 1.6  | 1.3  |
| Zfp866    | 3.6  | 3.5  | 3.9  | 3.5  | 3.5  | 3.0  | 3.4  | 4.0  | 3.5  | 3.2  | 4.0  | 4.0  |
| Zfp867    | 4.0  | 3.4  | 3.9  | 3.0  | 2.9  | 3.1  | 2.4  | 3.5  | 3.4  | 3.3  | 3.6  | 3.9  |
| Zfp868    | 2.4  | 2.6  | 2.7  | 2.8  | 2.7  | 2.3  | 2.5  | 3.1  | 2.8  | 3.6  | 2.7  | 3.3  |
| Zfp869    | 8.1  | 7.0  | 7.9  | 8.3  | 7.0  | 7.3  | 7.1  | 7.2  | 7.3  | 8.6  | 7.9  | 8.0  |
| Zfp87     | 3.5  | 3.5  | 3.5  | 2.9  | 3.8  | 3.8  | 3.6  | 4.1  | 3.3  | 4.0  | 3.5  | 3.9  |
| Zfp870    | 1.7  | 1.2  | 1.6  | 1.2  | 1.4  | 1.6  | 1.5  | 1.5  | 1.3  | 1.5  | 1.5  | 1.6  |
| Zfp871    | 3.3  | 4.1  | 4.5  | 3.9  | 4.0  | 3.8  | 3.4  | 3.6  | 3.4  | 3.8  | 3.9  | 3.9  |
| Zfp872    | 0.2  | 0.1  | 0.1  | 0.1  | 0.1  | 0.1  | 0.2  | 0.1  | 0.1  | 0.1  | 0.1  | 0.1  |
| Zfp873    | 1.1  | 1.2  | 1.0  | 1.7  | 1.0  | 1.1  | 0.9  | 1.1  | 1.1  | 1.2  | 1.4  | 1.1  |
| Zfp874a   | 7.6  | 6.9  | 6.8  | 7.4  | 6.4  | 6.4  | 5.0  | 4.5  | 5.5  | 8.5  | 6.8  | 6.6  |
| Zfp874b   | 3.8  | 3.4  | 2.7  | 4.0  | 3.6  | 3.8  | 1.9  | 2.3  | 2.4  | 3.6  | 3.0  | 3.0  |
| Zfp879    | 0.3  | 0.2  | 0.3  | 0.2  | 0.2  | 0.6  | 0.2  | 0.3  | 0.1  | 0.3  | 0.4  | 0.3  |
| Zfp882    | 0.5  | 0.5  | 0.6  | 0.5  | 0.5  | 0.6  | 0.6  | 0.7  | 0.6  | 0.5  | 0.7  | 0.7  |
| Zfp9      | 5.3  | 6.0  | 6.3  | 6.2  | 5.5  | 6.0  | 5.8  | 7.3  | 6.7  | 5.7  | 7.7  | 7.3  |
| Zfp90     | 4.2  | 4.0  | 4.1  | 4.2  | 3.9  | 4.4  | 4.1  | 4.6  | 3.8  | 4.6  | 5.2  | 4.8  |
| Zfp91     | 20.9 | 18.7 | 21.0 | 24.9 | 19.7 | 21.2 | 20.7 | 18.1 | 17.6 | 17.9 | 20.2 | 22.0 |
| Zfp92     | 0.0  | 0.0  | 0.0  | 0.0  | 0.0  | 0.0  | 0.0  | 0.0  | 0.0  | 0.0  | 0.0  | 0.0  |
| Zfp93     | 2.7  | 3.2  | 3.1  | 3.0  | 2.4  | 3.2  | 2.4  | 2.7  | 2.8  | 2.7  | 2.9  | 3.2  |
| Zfp930    | 3.2  | 3.2  | 2.8  | 3.0  | 3.1  | 3.7  | 2.1  | 2.8  | 2.3  | 2.8  | 3.7  | 3.4  |
| Zfp931    | 3.1  | 3.0  | 2.2  | 4.0  | 2.7  | 3.5  | 2.8  | 2.3  | 2.6  | 4.3  | 3.9  | 3.5  |
| Zfp932    | 7.0  | 7.9  | 6.7  | 5.6  | 6.2  | 7.9  | 4.7  | 5.5  | 5.3  | 6.4  | 8.6  | 6.4  |
| Zfp933    | 3.9  | 3.3  | 3.5  | 4.9  | 3.3  | 4.1  | 3.0  | 3.2  | 2.6  | 3.1  | 3.4  | 3.3  |
| Zfp934    | 1.3  | 2.0  | 2.6  | 1.2  | 2.0  | 2.2  | 1.7  | 1.9  | 1.6  | 1.8  | 2.5  | 2.0  |
| Zfp935    | 3.6  | 4.2  | 4.5  | 3.7  | 4.5  | 3.8  | 3.1  | 4.5  | 4.4  | 4.4  | 4.6  | 5.2  |
| Zfp936    | 0.0  | 0.0  | 0.0  | 0.0  | 0.0  | 0.0  | 0.0  | 0.0  | 0.0  | 0.0  | 0.0  | 0.0  |
| Zfp937    | 2.2  | 2.4  | 2.9  | 2.1  | 1.9  | 2.4  | 2.1  | 2.8  | 2.2  | 2.6  | 2.7  | 2.8  |
| Zfp938    | 3.0  | 2.8  | 2.7  | 3.9  | 3.2  | 3.0  | 2.6  | 2.6  | 3.1  | 3.7  | 3.5  | 3.7  |
| Zfp939    | 1.1  | 1.0  | 0.9  | 0.9  | 0.9  | 0.9  | 0.5  | 0.9  | 0.7  | 0.8  | 1.1  | 0.8  |
| Zfp94     | 1.1  | 1.1  | 1.0  | 1.8  | 1.0  | 1.9  | 0.9  | 1.2  | 0.9  | 1.2  | 0.9  | 1.2  |
| Zfp940    | 0.3  | 0.5  | 0.5  | 0.5  | 0.4  | 0.4  | 0.3  | 0.4  | 0.3  | 0.4  | 0.5  | 0.6  |
| Zfp941    | 0.4  | 0.2  | 0.1  | 0.3  | 0.2  | 0.3  | 0.3  | 0.2  | 0.1  | 0.4  | 0.3  | 0.2  |
| Zfp942    | 3.3  | 4.4  | 4.9  | 4.6  | 4.9  | 5.3  | 4.0  | 4.1  | 4.3  | 4.7  | 5.1  | 5.5  |
| Zfp943    | 3.3  | 4.1  | 5.1  | 3.5  | 4.5  | 3.9  | 3.5  | 4.3  | 4.2  | 4.3  | 5.8  | 4.9  |
| Zfp944    | 2.9  | 4.3  | 4.3  | 3.7  | 3.8  | 3.7  | 3.3  | 3.5  | 3.3  | 4.3  | 4.1  | 4.1  |

Online Table 1

|          |      |      |      |      |      |      |      |      |      |      |      |      |
|----------|------|------|------|------|------|------|------|------|------|------|------|------|
| Zfp945   | 2.2  | 1.9  | 2.2  | 1.9  | 1.7  | 1.9  | 1.9  | 2.4  | 2.2  | 2.4  | 2.9  | 2.6  |
| Zfp946   | 1.2  | 1.8  | 2.2  | 2.2  | 1.9  | 1.9  | 1.8  | 2.5  | 2.0  | 1.7  | 2.7  | 2.0  |
| Zfp947   | 1.1  | 1.7  | 1.5  | 1.9  | 1.5  | 1.8  | 1.2  | 1.7  | 1.2  | 1.6  | 2.0  | 2.1  |
| Zfp948   | 6.3  | 6.8  | 8.3  | 7.2  | 8.5  | 6.5  | 10.0 | 6.8  | 8.1  | 6.9  | 9.6  | 9.8  |
| Zfp949   | 2.1  | 2.0  | 2.5  | 2.1  | 1.9  | 2.2  | 1.8  | 2.6  | 2.6  | 2.4  | 1.9  | 2.9  |
| Zfp951   | 2.6  | 1.8  | 1.7  | 2.3  | 1.9  | 2.5  | 1.7  | 2.4  | 1.7  | 2.2  | 2.1  | 2.2  |
| Zfp952   | 3.1  | 2.9  | 3.1  | 2.5  | 3.1  | 3.0  | 2.2  | 3.0  | 2.9  | 2.6  | 2.8  | 3.4  |
| Zfp953   | 0.8  | 1.0  | 1.1  | 0.7  | 0.9  | 0.6  | 0.8  | 0.8  | 0.8  | 0.9  | 1.1  | 0.9  |
| Zfp954   | 4.9  | 3.9  | 4.3  | 3.7  | 3.9  | 3.7  | 3.7  | 4.1  | 3.8  | 4.1  | 4.4  | 4.5  |
| Zfp955a  | 6.5  | 6.5  | 6.7  | 6.0  | 5.9  | 5.8  | 6.1  | 5.5  | 6.4  | 5.8  | 5.9  | 7.4  |
| Zfp955b  | 7.2  | 6.9  | 7.1  | 6.0  | 6.2  | 6.5  | 6.3  | 5.3  | 6.1  | 5.9  | 6.5  | 7.9  |
| Zfp956   | 1.8  | 1.9  | 1.8  | 1.8  | 1.4  | 1.9  | 1.3  | 1.5  | 1.8  | 1.4  | 1.7  | 1.7  |
| Zfp957   | 0.1  | 0.0  | 0.0  | 0.0  | 0.0  | 0.0  | 0.0  | 0.0  | 0.0  | 0.0  | 0.0  | 0.0  |
| Zfp958   | 3.9  | 4.8  | 5.1  | 4.4  | 4.3  | 4.1  | 3.7  | 4.1  | 4.3  | 6.5  | 5.5  | 5.4  |
| Zfp959   | 1.5  | 1.6  | 1.8  | 1.7  | 1.6  | 1.3  | 1.3  | 2.2  | 1.7  | 2.0  | 1.6  | 1.8  |
| Zfp960   | 5.4  | 5.8  | 5.7  | 4.9  | 5.1  | 4.5  | 3.6  | 5.2  | 4.8  | 4.8  | 5.7  | 5.6  |
| Zfp961   | 1.7  | 2.1  | 2.6  | 1.9  | 1.9  | 1.8  | 1.5  | 2.0  | 2.3  | 2.0  | 2.0  | 2.1  |
| Zfp963   | 1.5  | 1.6  | 1.7  | 1.4  | 1.2  | 1.2  | 1.8  | 1.8  | 1.3  | 1.7  | 1.3  | 1.4  |
| Zfp964   | 1.5  | 1.4  | 1.5  | 1.1  | 1.0  | 1.4  | 1.1  | 0.9  | 1.5  | 1.5  | 1.3  | 1.5  |
| Zfp97    | 4.9  | 5.3  | 5.1  | 4.3  | 4.8  | 4.7  | 3.5  | 4.4  | 4.5  | 4.5  | 5.6  | 5.0  |
| Zfpl1    | 15.1 | 14.9 | 13.8 | 16.9 | 12.9 | 15.5 | 14.6 | 16.8 | 15.7 | 13.6 | 13.8 | 15.4 |
| Zfpm1    | 3.6  | 3.9  | 3.6  | 2.5  | 2.4  | 2.8  | 3.4  | 3.2  | 3.1  | 7.7  | 5.4  | 4.9  |
| Zfpm2    | 3.4  | 4.0  | 4.0  | 6.4  | 4.3  | 6.2  | 4.1  | 3.4  | 3.6  | 4.1  | 4.2  | 3.7  |
| Zfr      | 29.6 | 30.9 | 30.4 | 33.9 | 28.2 | 31.8 | 30.9 | 33.0 | 26.9 | 33.4 | 39.2 | 36.7 |
| Zfr2     | 1.5  | 1.9  | 2.2  | 1.6  | 0.9  | 2.5  | 1.1  | 1.6  | 1.8  | 1.4  | 1.0  | 1.3  |
| Zfx      | 8.6  | 8.3  | 7.2  | 7.6  | 7.3  | 7.9  | 7.0  | 6.5  | 7.5  | 9.0  | 10.0 | 10.1 |
| Zfyve1   | 13.4 | 13.6 | 13.1 | 12.1 | 12.4 | 12.9 | 12.0 | 12.6 | 13.9 | 13.3 | 13.1 | 13.0 |
| Zfyve16  | 10.7 | 9.7  | 8.5  | 9.9  | 9.6  | 9.1  | 8.4  | 8.2  | 9.0  | 11.0 | 11.2 | 10.3 |
| Zfyve19  | 3.4  | 3.9  | 3.7  | 3.9  | 3.9  | 3.8  | 4.2  | 4.3  | 3.9  | 4.0  | 4.5  | 3.9  |
| Zfyve20  | 9.9  | 10.3 | 8.9  | 10.8 | 9.5  | 9.1  | 9.6  | 9.0  | 8.9  | 8.8  | 9.8  | 9.8  |
| Zfyve21  | 12.4 | 15.8 | 12.5 | 9.7  | 12.1 | 13.5 | 12.9 | 15.3 | 16.1 | 14.8 | 12.1 | 13.0 |
| Zfyve26  | 2.6  | 3.2  | 2.9  | 2.8  | 3.0  | 2.9  | 2.5  | 3.0  | 2.7  | 2.3  | 2.2  | 2.1  |
| Zfyve27  | 4.0  | 3.9  | 3.1  | 4.9  | 4.3  | 4.4  | 4.0  | 3.8  | 4.1  | 3.8  | 3.8  | 3.7  |
| Zfyve28  | 0.3  | 0.3  | 0.6  | 0.2  | 0.4  | 0.2  | 0.6  | 1.0  | 1.1  | 0.6  | 0.8  | 0.8  |
| Zfyve9   | 13.3 | 11.4 | 9.8  | 11.9 | 8.8  | 13.4 | 9.3  | 10.5 | 9.3  | 10.1 | 10.8 | 10.7 |
| Zglp1    | 0.1  | 0.0  | 0.1  | 0.0  | 0.1  | 0.1  | 0.1  | 0.1  | 0.0  | 0.1  | 0.0  | 0.0  |
| Zgpat    | 10.5 | 9.1  | 8.8  | 9.7  | 8.9  | 10.6 | 7.9  | 8.3  | 10.9 | 11.4 | 8.8  | 8.5  |
| Zhx1     | 24.9 | 24.6 | 22.0 | 30.8 | 21.4 | 25.0 | 22.0 | 19.0 | 19.8 | 21.8 | 24.8 | 25.3 |
| Zhx2     | 6.0  | 8.1  | 9.9  | 6.9  | 6.2  | 6.9  | 6.4  | 8.2  | 7.0  | 4.9  | 5.9  | 6.5  |
| Zhx3     | 4.8  | 5.7  | 6.4  | 5.4  | 4.4  | 4.2  | 5.0  | 5.2  | 4.4  | 4.0  | 4.4  | 5.1  |
| Zic1     | 0.0  | 0.0  | 0.0  | 0.0  | 0.0  | 0.0  | 0.0  | 0.0  | 0.1  | 0.1  | 0.1  | 0.1  |
| Zic3     | 0.2  | 0.1  | 0.0  | 0.0  | 0.0  | 0.0  | 0.0  | 0.0  | 0.0  | 0.0  | 0.0  | 0.0  |
| Zic5     | 0.1  | 0.0  | 0.0  | 0.0  | 0.0  | 0.0  | 0.0  | 0.0  | 0.0  | 0.1  | 0.0  | 0.0  |
| Zik1     | 1.4  | 1.5  | 1.2  | 1.3  | 1.6  | 1.4  | 1.5  | 1.3  | 1.4  | 1.3  | 1.4  | 1.5  |
| Zim1     | 0.0  | 0.0  | 0.0  | 0.0  | 0.0  | 0.0  | 0.0  | 0.0  | 0.0  | 0.2  | 0.2  | 0.1  |
| Zkscan1  | 6.0  | 5.9  | 6.8  | 5.7  | 5.4  | 5.8  | 5.1  | 6.6  | 5.6  | 6.8  | 6.1  | 7.0  |
| Zkscan14 | 3.1  | 3.2  | 2.7  | 3.6  | 3.0  | 4.4  | 2.3  | 2.4  | 2.3  | 3.4  | 3.0  | 3.2  |
| Zkscan16 | 0.0  | 0.1  | 0.0  | 0.0  | 0.0  | 0.1  | 0.0  | 0.1  | 0.0  | 0.0  | 0.0  | 0.0  |
| Zkscan17 | 3.9  | 4.3  | 4.7  | 3.3  | 4.0  | 4.6  | 4.2  | 4.9  | 4.5  | 4.4  | 4.5  | 3.6  |
| Zkscan2  | 0.1  | 0.1  | 0.1  | 0.1  | 0.1  | 0.2  | 0.1  | 0.0  | 0.0  | 0.0  | 0.0  | 0.1  |
| Zkscan3  | 12.3 | 12.7 | 11.8 | 10.0 | 9.6  | 9.9  | 10.0 | 11.8 | 13.3 | 13.9 | 12.4 | 12.4 |
| Zkscan4  | 1.5  | 1.9  | 1.6  | 1.3  | 1.2  | 1.6  | 1.3  | 1.2  | 1.6  | 1.7  | 1.3  | 1.5  |
| Zkscan5  | 3.6  | 3.8  | 4.1  | 4.0  | 3.4  | 3.9  | 4.0  | 4.4  | 3.4  | 4.4  | 4.3  | 4.3  |
| Zkscan6  | 3.6  | 3.5  | 3.4  | 2.6  | 3.9  | 4.3  | 3.5  | 3.5  | 3.5  | 4.9  | 4.2  | 4.2  |
| Zkscan7  | 2.2  | 2.4  | 2.7  | 2.0  | 1.8  | 1.7  | 1.6  | 2.5  | 2.1  | 2.5  | 1.8  | 2.2  |
| Zkscan8  | 3.1  | 3.4  | 3.9  | 3.7  | 3.1  | 3.3  | 3.4  | 3.5  | 3.1  | 3.7  | 3.8  | 3.8  |
| Zmat1    | 1.0  | 1.3  | 1.5  | 1.0  | 0.9  | 1.2  | 1.0  | 1.2  | 1.0  | 1.3  | 1.5  | 1.6  |

Online Table 1

|          |      |      |      |      |      |      |      |      |      |      |      |      |
|----------|------|------|------|------|------|------|------|------|------|------|------|------|
| Zmat2    | 27.7 | 23.2 | 27.6 | 37.6 | 22.7 | 28.7 | 23.6 | 24.4 | 17.9 | 21.4 | 27.3 | 26.8 |
| Zmat3    | 6.1  | 6.6  | 5.7  | 6.5  | 6.7  | 7.5  | 6.4  | 5.3  | 5.9  | 7.1  | 5.7  | 5.2  |
| Zmat4    | 0.0  | 0.0  | 0.0  | 0.0  | 0.0  | 0.0  | 0.0  | 0.0  | 0.0  | 0.0  | 0.0  | 0.1  |
| Zmat5    | 11.3 | 10.6 | 6.8  | 13.0 | 13.4 | 10.3 | 9.2  | 10.9 | 10.1 | 10.0 | 10.8 | 9.3  |
| Zmiz1    | 1.1  | 1.7  | 2.0  | 1.6  | 2.2  | 1.3  | 2.8  | 2.3  | 2.5  | 1.9  | 1.9  | 1.6  |
| Zmiz2    | 1.2  | 2.2  | 1.3  | 1.8  | 2.2  | 1.6  | 1.5  | 1.3  | 1.5  | 1.4  | 1.3  | 0.9  |
| Zmpste24 | 24.1 | 23.8 | 22.1 | 26.3 | 22.9 | 24.2 | 24.0 | 22.3 | 21.3 | 23.4 | 25.2 | 24.6 |
| Zmym1    | 2.5  | 3.4  | 3.6  | 3.4  | 3.6  | 3.3  | 3.6  | 2.9  | 3.0  | 3.2  | 3.4  | 2.9  |
| Zmym2    | 10.9 | 11.8 | 11.8 | 10.9 | 10.8 | 11.3 | 10.3 | 11.3 | 11.7 | 11.6 | 13.0 | 13.4 |
| Zmym3    | 3.5  | 4.5  | 6.4  | 2.5  | 3.9  | 4.3  | 3.9  | 5.3  | 4.7  | 4.6  | 4.7  | 3.8  |
| Zmym4    | 6.0  | 7.0  | 6.5  | 5.5  | 5.3  | 5.4  | 5.8  | 6.1  | 5.8  | 6.4  | 6.3  | 6.8  |
| Zmym5    | 4.5  | 4.9  | 5.4  | 4.4  | 4.3  | 4.5  | 4.4  | 4.7  | 5.0  | 4.8  | 4.7  | 5.3  |
| Zmym6    | 5.5  | 6.3  | 6.1  | 5.1  | 4.9  | 6.5  | 4.2  | 4.8  | 5.1  | 5.7  | 4.9  | 6.0  |
| Zmynd10  | 0.1  | 0.0  | 0.1  | 0.2  | 0.1  | 0.2  | 0.0  | 0.0  | 0.1  | 0.0  | 0.0  | 0.0  |
| Zmynd11  | 23.3 | 21.1 | 22.6 | 26.9 | 19.1 | 24.4 | 22.0 | 22.8 | 21.1 | 21.3 | 24.9 | 25.8 |
| Zmynd12  | 0.3  | 0.2  | 0.1  | 0.6  | 0.2  | 0.5  | 0.1  | 0.2  | 0.1  | 0.2  | 0.1  | 0.5  |
| Zmynd15  | 0.8  | 0.4  | 0.8  | 1.8  | 3.9  | 0.8  | 1.0  | 0.6  | 0.5  | 0.8  | 0.4  | 0.9  |
| Zmynd19  | 11.9 | 9.7  | 9.3  | 9.5  | 10.3 | 9.5  | 10.8 | 10.6 | 10.4 | 9.7  | 11.4 | 8.7  |
| Zmynd8   | 12.1 | 13.5 | 14.3 | 15.8 | 13.5 | 13.5 | 14.0 | 14.2 | 12.5 | 11.8 | 11.9 | 11.0 |
| Znf41-ps | 4.7  | 4.9  | 5.4  | 5.6  | 5.0  | 7.0  | 3.8  | 4.4  | 4.1  | 4.7  | 5.3  | 5.6  |
| Znf512b  | 3.2  | 3.6  | 4.0  | 2.5  | 2.9  | 2.5  | 3.6  | 3.1  | 3.9  | 3.4  | 2.9  | 2.8  |
| Znfx1    | 15.7 | 16.5 | 17.4 | 22.8 | 18.3 | 15.7 | 16.4 | 14.6 | 14.2 | 10.7 | 13.6 | 15.2 |
| Znhit1   | 17.4 | 16.6 | 15.1 | 22.8 | 14.9 | 18.4 | 17.0 | 17.6 | 14.7 | 16.7 | 19.7 | 18.5 |
| Znhit2   | 11.6 | 10.2 | 7.7  | 10.9 | 8.4  | 12.0 | 9.6  | 9.4  | 10.3 | 10.6 | 9.3  | 8.6  |
| Znhit3   | 4.8  | 6.2  | 5.3  | 5.5  | 5.5  | 5.1  | 5.0  | 5.1  | 4.7  | 5.0  | 3.7  | 5.0  |
| Znhit6   | 4.3  | 3.7  | 3.4  | 4.3  | 3.6  | 3.9  | 3.1  | 2.3  | 2.8  | 4.0  | 3.7  | 4.1  |
| Znrd1    | 11.5 | 10.5 | 9.6  | 12.3 | 9.5  | 11.9 | 9.9  | 13.4 | 9.7  | 13.5 | 11.0 | 12.8 |
| Znrd1as  | 10.5 | 11.5 | 11.3 | 11.2 | 6.9  | 10.7 | 6.8  | 9.2  | 5.0  | 7.0  | 6.9  | 9.1  |
| Znrf1    | 5.8  | 4.6  | 4.3  | 6.0  | 6.2  | 5.8  | 4.4  | 4.0  | 4.4  | 4.3  | 4.3  | 3.4  |
| Znrf2    | 21.1 | 17.2 | 14.4 | 21.8 | 16.3 | 18.3 | 16.0 | 12.6 | 14.8 | 17.4 | 17.5 | 21.6 |
| Znrf3    | 0.9  | 0.8  | 0.8  | 0.7  | 0.7  | 0.8  | 1.0  | 0.7  | 0.7  | 0.8  | 0.7  | 0.8  |
| Zp1      | 0.0  | 0.0  | 0.0  | 0.0  | 0.0  | 0.0  | 0.0  | 0.0  | 0.0  | 0.0  | 0.0  | 0.0  |
| Zp3      | 0.1  | 0.0  | 0.0  | 0.0  | 0.0  | 0.2  | 0.1  | 0.2  | 0.1  | 0.0  | 0.1  | 0.0  |
| Zpbp     | 0.1  | 0.1  | 0.0  | 0.1  | 0.0  | 0.1  | 0.1  | 0.1  | 0.1  | 0.1  | 0.1  | 0.1  |
| Zpbp2    | 0.1  | 0.1  | 0.1  | 0.1  | 0.0  | 0.1  | 0.2  | 0.2  | 0.0  | 0.1  | 0.0  | 0.0  |
| Zpld1    | 0.0  | 0.0  | 0.0  | 0.0  | 0.0  | 0.0  | 0.0  | 0.0  | 0.0  | 0.0  | 0.0  | 0.0  |
| Zranb1   | 11.4 | 12.1 | 13.7 | 10.7 | 9.8  | 12.1 | 9.4  | 12.1 | 11.5 | 11.0 | 12.0 | 13.3 |
| Zranb2   | 33.8 | 30.7 | 36.8 | 40.6 | 28.1 | 39.3 | 31.3 | 25.8 | 24.7 | 30.7 | 40.6 | 37.9 |
| Zranb3   | 1.0  | 1.5  | 1.6  | 1.9  | 2.5  | 1.0  | 1.7  | 1.5  | 1.4  | 1.2  | 1.2  | 1.0  |
| Zrsr1    | 6.2  | 5.1  | 6.7  | 5.7  | 4.1  | 7.0  | 4.9  | 5.7  | 4.4  | 5.7  | 5.7  | 7.7  |
| Zrsr2    | 7.7  | 7.2  | 9.9  | 9.5  | 7.1  | 7.6  | 8.5  | 8.8  | 5.5  | 7.7  | 9.1  | 10.8 |
| Zscan12  | 2.7  | 2.4  | 2.6  | 2.2  | 2.2  | 2.3  | 2.0  | 2.5  | 2.2  | 2.3  | 2.5  | 3.1  |
| Zscan18  | 0.8  | 1.0  | 0.5  | 1.0  | 0.6  | 0.9  | 0.5  | 0.4  | 0.5  | 0.8  | 0.7  | 0.6  |
| Zscan2   | 1.1  | 0.9  | 1.5  | 1.3  | 1.2  | 1.1  | 0.8  | 1.4  | 0.9  | 1.2  | 1.0  | 1.0  |
| Zscan20  | 1.6  | 1.4  | 1.4  | 1.5  | 1.3  | 1.5  | 1.2  | 1.2  | 1.4  | 1.3  | 1.4  | 1.1  |
| Zscan21  | 5.7  | 6.0  | 6.1  | 7.2  | 5.7  | 6.4  | 5.4  | 7.2  | 6.1  | 6.4  | 6.8  | 7.9  |
| Zscan22  | 1.2  | 1.3  | 1.3  | 1.5  | 1.1  | 1.1  | 0.9  | 1.1  | 0.7  | 1.3  | 1.4  | 1.3  |
| Zscan25  | 4.1  | 3.9  | 2.9  | 3.6  | 3.8  | 3.3  | 3.9  | 3.5  | 3.6  | 3.8  | 3.3  | 3.2  |
| Zscan26  | 12.1 | 12.3 | 13.0 | 12.7 | 10.5 | 12.9 | 9.5  | 11.3 | 10.7 | 13.2 | 12.3 | 12.6 |
| Zscan29  | 4.0  | 3.8  | 3.6  | 4.7  | 4.1  | 3.9  | 4.1  | 3.4  | 3.5  | 3.4  | 3.9  | 3.8  |
| Zswim1   | 3.0  | 3.2  | 2.7  | 3.0  | 2.8  | 3.4  | 2.9  | 3.3  | 2.6  | 2.6  | 3.0  | 2.6  |
| Zswim3   | 1.7  | 2.1  | 1.8  | 1.7  | 1.9  | 1.5  | 2.0  | 1.9  | 1.7  | 1.7  | 1.8  | 1.9  |
| Zswim4   | 4.2  | 3.9  | 3.6  | 4.0  | 5.5  | 3.6  | 4.7  | 3.7  | 3.6  | 4.6  | 3.7  | 3.0  |
| Zswim5   | 0.1  | 0.0  | 0.0  | 0.1  | 0.0  | 0.0  | 0.1  | 0.0  | 0.0  | 0.0  | 0.0  | 0.0  |
| Zswim6   | 8.0  | 9.0  | 9.4  | 8.3  | 9.9  | 7.7  | 12.5 | 7.7  | 9.7  | 9.4  | 9.9  | 10.6 |
| Zswim7   | 6.1  | 7.2  | 7.3  | 4.0  | 5.2  | 6.1  | 7.8  | 7.9  | 6.7  | 6.8  | 6.9  | 8.0  |
| Zswim8   | 11.9 | 12.3 | 12.5 | 13.0 | 11.6 | 11.5 | 15.3 | 12.8 | 14.2 | 12.5 | 12.9 | 11.8 |

Online Table 1

|        |      |      |      |      |      |      |      |      |      |      |      |      |
|--------|------|------|------|------|------|------|------|------|------|------|------|------|
| Zufsp  | 4.5  | 5.7  | 4.8  | 5.5  | 4.6  | 3.7  | 4.0  | 4.0  | 4.0  | 5.0  | 5.3  | 4.6  |
| Zw10   | 6.9  | 6.2  | 5.9  | 6.4  | 7.3  | 7.0  | 6.6  | 5.6  | 6.1  | 6.4  | 6.2  | 5.9  |
| Zwilch | 3.1  | 4.5  | 6.0  | 2.2  | 5.2  | 1.7  | 5.4  | 3.0  | 4.5  | 2.4  | 3.8  | 2.6  |
| Zwint  | 30.9 | 25.4 | 21.0 | 41.0 | 26.4 | 33.6 | 27.8 | 17.4 | 17.3 | 23.2 | 23.8 | 23.2 |
| Zxda   | 1.2  | 1.5  | 1.4  | 1.2  | 1.2  | 1.5  | 1.4  | 1.2  | 1.3  | 1.4  | 1.4  | 1.2  |
| Zxdb   | 1.7  | 2.0  | 2.1  | 1.8  | 1.7  | 2.1  | 2.0  | 1.8  | 2.1  | 2.3  | 2.2  | 1.8  |
| Zxdc   | 2.7  | 2.8  | 2.4  | 2.7  | 2.4  | 2.6  | 2.1  | 2.5  | 2.3  | 3.0  | 2.5  | 2.8  |
| Zyg11a | 0.0  | 0.0  | 0.0  | 0.0  | 0.0  | 0.0  | 0.0  | 0.0  | 0.0  | 0.0  | 0.0  | 0.0  |
| Zyg11b | 9.2  | 9.5  | 9.2  | 8.9  | 8.1  | 9.7  | 8.0  | 9.0  | 9.0  | 9.1  | 9.5  | 9.3  |
| Zyx    | 33.1 | 35.5 | 34.4 | 28.4 | 36.2 | 30.1 | 48.4 | 47.1 | 45.6 | 59.3 | 66.5 | 30.5 |
| Zzef1  | 7.4  | 8.1  | 7.0  | 7.2  | 7.9  | 6.6  | 8.2  | 6.8  | 8.1  | 8.2  | 7.7  | 7.9  |
| Zzz3   | 12.4 | 11.7 | 11.3 | 11.1 | 10.2 | 12.2 | 11.3 | 10.8 | 10.7 | 12.2 | 13.1 | 12.5 |

| Excluded genes |      |      |      |      |      |      |      |      |      |      |      |      |
|----------------|------|------|------|------|------|------|------|------|------|------|------|------|
|                | 1    | 2    | 3    | 4    | 5    | 6    | 7    | 8    | 9    | 10   | 11   | 12   |
| gene           | A D0 | A D0 | A D0 | B D1 | B D1 | B D1 | C D3 | C D3 | C D3 | D D7 | D D7 | D D7 |
| 42433          | 0.0  | 0.0  | 0.0  | 0.0  | 0.0  | 0.0  | 0.0  | 0.0  | 0.0  | 0.0  | 0.0  | 0.0  |
| 42439          | 0.0  | 0.0  | 0.0  | 0.0  | 0.0  | 0.0  | 0.0  | 0.0  | 0.0  | 0.0  | 0.0  | 0.0  |
| 42625          | 0.0  | 0.0  | 0.0  | 0.0  | 0.0  | 0.0  | 0.0  | 0.0  | 0.0  | 0.1  | 0.0  | 0.0  |
| 0610008F07Rik  | 0.0  | 0.1  | 0.0  | 0.0  | 0.0  | 0.0  | 0.0  | 0.0  | 0.0  | 0.0  | 0.0  | 0.0  |
| 0610009B14Rik  | 0.0  | 0.0  | 0.0  | 0.0  | 0.0  | 0.0  | 0.1  | 0.0  | 0.0  | 0.0  | 0.0  | 0.0  |
| 0610031O16Rik  | 0.0  | 0.0  | 0.0  | 0.0  | 0.1  | 0.0  | 0.0  | 0.0  | 0.0  | 0.1  | 0.0  | 0.0  |
| 0610040J01Rik  | 0.0  | 0.0  | 0.0  | 0.0  | 0.0  | 0.0  | 0.0  | 0.0  | 0.0  | 0.0  | 0.0  | 0.0  |
| 1110028F18Rik  | 0.0  | 0.0  | 0.0  | 0.0  | 0.0  | 0.0  | 0.0  | 0.0  | 0.0  | 0.0  | 0.0  | 0.0  |
| 1110032F04Rik  | 0.0  | 0.0  | 0.0  | 0.0  | 0.0  | 0.0  | 0.0  | 0.0  | 0.0  | 0.0  | 0.0  | 0.0  |
| 1300015D01Rik  | 0.0  | 0.0  | 0.0  | 0.0  | 0.0  | 0.0  | 0.0  | 0.0  | 0.0  | 0.0  | 0.0  | 0.0  |
| 1500012K07Rik  | 0.0  | 0.0  | 0.0  | 0.0  | 0.0  | 0.0  | 0.0  | 0.0  | 0.0  | 0.0  | 0.0  | 0.0  |
| 1600002D24Rik  | 0.0  | 0.0  | 0.0  | 0.0  | 0.0  | 0.0  | 0.0  | 0.0  | 0.0  | 0.0  | 0.0  | 0.0  |
| 1600019K03Rik  | 0.0  | 0.0  | 0.0  | 0.1  | 0.0  | 0.6  | 0.0  | 0.0  | 0.0  | 0.0  | 0.0  | 0.0  |
| 1600029I14Rik  | 0.0  | 0.0  | 0.0  | 0.0  | 0.0  | 0.0  | 0.0  | 0.0  | 0.0  | 0.0  | 0.0  | 0.1  |
| 1600029O15Rik  | 0.0  | 0.0  | 0.0  | 0.0  | 0.0  | 0.0  | 0.0  | 0.0  | 0.0  | 0.0  | 0.0  | 0.0  |
| 1700001D01Rik  | 0.0  | 0.1  | 0.0  | 0.0  | 0.0  | 0.0  | 0.0  | 0.0  | 0.0  | 0.0  | 0.0  | 0.0  |
| 1700001F09Rik  | 0.1  | 0.0  | 0.0  | 0.0  | 0.0  | 0.0  | 0.0  | 0.0  | 0.0  | 0.0  | 0.0  | 0.0  |
| 1700003D09Rik  | 0.0  | 0.0  | 0.0  | 0.0  | 0.0  | 0.0  | 0.0  | 0.0  | 0.0  | 0.0  | 0.0  | 0.0  |
| 1700003G18Rik  | 0.1  | 0.0  | 0.0  | 0.0  | 0.1  | 0.0  | 0.0  | 0.2  | 0.0  | 0.0  | 0.0  | 0.0  |
| 1700006F04Rik  | 0.0  | 0.0  | 0.0  | 0.0  | 0.0  | 0.0  | 0.0  | 0.0  | 0.0  | 0.0  | 0.0  | 0.0  |
| 1700006H21Rik  | 0.1  | 0.1  | 0.0  | 0.0  | 0.0  | 0.1  | 0.0  | 0.0  | 0.0  | 0.0  | 0.0  | 0.0  |
| 1700007F19Rik  | 0.0  | 0.0  | 0.0  | 0.0  | 0.0  | 0.0  | 0.0  | 0.0  | 0.0  | 0.0  | 0.0  | 0.0  |
| 1700007K09Rik  | 0.0  | 0.0  | 0.0  | 0.0  | 0.1  | 0.0  | 0.0  | 0.1  | 0.1  | 0.0  | 0.0  | 0.0  |
| 1700009C05Rik  | 0.0  | 0.0  | 0.1  | 0.0  | 0.0  | 0.0  | 0.0  | 0.0  | 0.0  | 0.0  | 0.0  | 0.0  |
| 1700010B08Rik  | 0.0  | 0.0  | 0.0  | 0.0  | 0.0  | 0.0  | 0.0  | 0.0  | 0.0  | 0.0  | 0.0  | 0.0  |
| 1700010D01Rik  | 0.0  | 0.0  | 0.0  | 0.0  | 0.0  | 0.0  | 0.1  | 0.0  | 0.0  | 0.0  | 0.0  | 0.0  |
| 1700010I02Rik  | 0.0  | 0.0  | 0.0  | 0.0  | 0.0  | 0.0  | 0.0  | 0.2  | 0.0  | 0.0  | 0.2  | 0.0  |
| 1700011E24Rik  | 0.0  | 0.1  | 0.0  | 0.2  | 0.0  | 0.0  | 0.0  | 0.0  | 0.0  | 0.0  | 0.1  | 0.0  |
| 1700011H14Rik  | 0.0  | 0.0  | 0.0  | 0.0  | 0.0  | 0.1  | 0.0  | 0.0  | 0.0  | 0.0  | 0.0  | 0.0  |
| 1700011I03Rik  | 0.0  | 0.0  | 0.1  | 0.2  | 0.0  | 0.0  | 0.0  | 0.0  | 0.0  | 0.0  | 0.0  | 0.0  |
| 1700011M02Rik  | 0.0  | 0.0  | 0.0  | 0.0  | 0.0  | 0.0  | 0.0  | 0.0  | 0.0  | 0.0  | 0.0  | 0.0  |
| 1700012B07Rik  | 0.0  | 0.0  | 0.0  | 0.0  | 0.0  | 0.0  | 0.0  | 0.0  | 0.0  | 0.0  | 0.1  | 0.1  |
| 1700012B09Rik  | 0.0  | 0.1  | 0.0  | 0.0  | 0.1  | 0.2  | 0.0  | 0.0  | 0.1  | 0.1  | 0.0  | 0.0  |
| 1700012I11Rik  | 0.0  | 0.0  | 0.1  | 0.0  | 0.0  | 0.0  | 0.0  | 0.0  | 0.0  | 0.0  | 0.0  | 0.0  |
| 1700012L04Rik  | 0.0  | 0.0  | 0.0  | 0.0  | 0.0  | 0.1  | 0.0  | 0.0  | 0.1  | 0.0  | 0.0  | 0.0  |
| 1700013F07Rik  | 0.0  | 0.0  | 0.1  | 0.0  | 0.1  | 0.0  | 0.0  | 0.0  | 0.1  | 0.1  | 0.0  | 0.1  |
| 1700013G24Rik  | 0.0  | 0.0  | 0.0  | 0.1  | 0.0  | 0.0  | 0.0  | 0.0  | 0.1  | 0.0  | 0.0  | 0.0  |
| 1700013H16Rik  | 0.0  | 0.1  | 0.0  | 0.0  | 0.0  | 0.0  | 0.0  | 0.1  | 0.0  | 0.0  | 0.0  | 0.0  |
| 1700015E13Rik  | 0.0  | 0.1  | 0.0  | 0.0  | 0.0  | 0.0  | 0.0  | 0.0  | 0.0  | 0.0  | 0.0  | 0.0  |
| 1700015G11Rik  | 0.0  | 0.0  | 0.0  | 0.2  | 0.0  | 0.0  | 0.0  | 0.0  | 0.0  | 0.0  | 0.0  | 0.0  |
| 1700016D06Rik  | 0.0  | 0.0  | 0.0  | 0.0  | 0.0  | 0.0  | 0.0  | 0.0  | 0.1  | 0.0  | 0.0  | 0.0  |
| 1700016H13Rik  | 0.0  | 0.1  | 0.0  | 0.0  | 0.0  | 0.0  | 0.0  | 0.0  | 0.0  | 0.0  | 0.0  | 0.0  |
| 1700016L21Rik  | 0.0  | 0.0  | 0.0  | 0.0  | 0.0  | 0.0  | 0.0  | 0.0  | 0.0  | 0.0  | 0.0  | 0.0  |
| 1700017D01Rik  | 0.0  | 0.0  | 0.0  | 0.0  | 0.0  | 0.0  | 0.0  | 0.0  | 0.0  | 0.0  | 0.0  | 0.0  |
| 1700017G19Rik  | 0.1  | 0.0  | 0.0  | 0.0  | 0.0  | 0.0  | 0.0  | 0.0  | 0.0  | 0.0  | 0.0  | 0.0  |
| 1700018B08Rik  | 0.0  | 0.0  | 0.0  | 0.0  | 0.0  | 0.0  | 0.0  | 0.0  | 0.0  | 0.0  | 0.0  | 0.0  |
| 1700018C11Rik  | 0.0  | 0.0  | 0.1  | 0.0  | 0.0  | 0.0  | 0.0  | 0.0  | 0.0  | 0.0  | 0.0  | 0.0  |
| 1700018F24Rik  | 0.0  | 0.0  | 0.0  | 0.0  | 0.0  | 0.0  | 0.0  | 0.0  | 0.0  | 0.0  | 0.0  | 0.0  |
| 1700019B03Rik  | 0.0  | 0.0  | 0.0  | 0.0  | 0.0  | 0.0  | 0.0  | 0.0  | 0.1  | 0.0  | 0.0  | 0.0  |
| 1700019D03Rik  | 0.0  | 0.0  | 0.1  | 0.0  | 0.0  | 0.0  | 0.0  | 0.0  | 0.0  | 0.0  | 0.0  | 0.0  |
| 1700019G24Rik  | 0.0  | 0.0  | 0.0  | 0.1  | 0.1  | 0.0  | 0.1  | 0.0  | 0.0  | 0.1  | 0.0  | 0.0  |
| 1700019M22Rik  | 0.0  | 0.0  | 0.0  | 0.0  | 0.0  | 0.0  | 0.0  | 0.0  | 0.0  | 0.0  | 0.0  | 0.0  |
| 1700019N19Rik  | 0.0  | 0.0  | 0.1  | 0.0  | 0.0  | 0.1  | 0.0  | 0.0  | 0.0  | 0.0  | 0.0  | 0.0  |
| 1700020A23Rik  | 0.0  | 0.0  | 0.2  | 0.0  | 0.0  | 0.0  | 0.0  | 0.0  | 0.1  | 0.2  | 0.0  | 0.0  |

Excluded Genes

|               |     |     |     |     |     |     |     |     |     |     |     |     |
|---------------|-----|-----|-----|-----|-----|-----|-----|-----|-----|-----|-----|-----|
| 1700020N01Rik | 0.0 | 0.0 | 0.0 | 0.0 | 0.0 | 0.0 | 0.0 | 0.0 | 0.0 | 0.0 | 0.0 | 0.0 |
| 1700021F07Rik | 0.1 | 0.0 | 0.0 | 0.0 | 0.0 | 0.0 | 0.0 | 0.0 | 0.0 | 0.0 | 0.0 | 0.0 |
| 1700021N21Rik | 0.0 | 0.0 | 0.1 | 0.0 | 0.0 | 0.0 | 0.0 | 0.0 | 0.0 | 0.0 | 0.0 | 0.0 |
| 1700022A21Rik | 0.0 | 0.0 | 0.0 | 0.0 | 0.0 | 0.0 | 0.0 | 0.0 | 0.0 | 0.0 | 0.0 | 0.0 |
| 1700022P22Rik | 0.1 | 0.0 | 0.0 | 0.0 | 0.0 | 0.0 | 0.0 | 0.0 | 0.0 | 0.0 | 0.0 | 0.0 |
| 1700023E05Rik | 0.0 | 0.0 | 0.0 | 0.0 | 0.0 | 0.0 | 0.0 | 0.0 | 0.0 | 0.0 | 0.0 | 0.0 |
| 1700023L04Rik | 0.1 | 0.0 | 0.0 | 0.0 | 0.0 | 0.1 | 0.0 | 0.0 | 0.0 | 0.0 | 0.0 | 0.0 |
| 1700024F13Rik | 0.0 | 0.1 | 0.0 | 0.0 | 0.0 | 0.0 | 0.1 | 0.0 | 0.0 | 0.1 | 0.0 | 0.0 |
| 1700024P03Rik | 0.0 | 0.0 | 0.0 | 0.0 | 0.0 | 0.0 | 0.0 | 0.2 | 0.0 | 0.0 | 0.0 | 0.0 |
| 1700025F22Rik | 0.0 | 0.0 | 0.0 | 0.0 | 0.0 | 0.0 | 0.0 | 0.0 | 0.0 | 0.0 | 0.0 | 0.0 |
| 1700025M24Rik | 0.1 | 0.0 | 0.0 | 0.0 | 0.0 | 0.0 | 0.0 | 0.0 | 0.0 | 0.0 | 0.0 | 0.0 |
| 1700026D11Rik | 0.0 | 0.0 | 0.0 | 0.0 | 0.0 | 0.0 | 0.0 | 0.0 | 0.0 | 0.1 | 0.0 | 0.0 |
| 1700027I24Rik | 0.1 | 0.0 | 0.0 | 0.0 | 0.0 | 0.0 | 0.0 | 0.0 | 0.1 | 0.0 | 0.0 | 0.0 |
| 1700028M03Rik | 0.0 | 0.0 | 0.2 | 0.0 | 0.0 | 0.0 | 0.0 | 0.0 | 0.0 | 0.0 | 0.0 | 0.1 |
| 1700029J03Rik | 0.1 | 0.0 | 0.0 | 0.0 | 0.0 | 0.0 | 0.0 | 0.1 | 0.0 | 0.0 | 0.0 | 0.1 |
| 1700029M20Rik | 0.0 | 0.0 | 0.0 | 0.0 | 0.0 | 0.0 | 0.0 | 0.0 | 0.0 | 0.0 | 0.0 | 0.0 |
| 1700029P11Rik | 0.0 | 0.0 | 0.0 | 0.0 | 0.0 | 0.0 | 0.0 | 0.0 | 0.0 | 0.1 | 0.0 | 0.0 |
| 1700030A11Rik | 0.0 | 0.0 | 0.0 | 0.0 | 0.0 | 0.0 | 0.0 | 0.0 | 0.0 | 0.0 | 0.0 | 0.0 |
| 1700030F04Rik | 0.0 | 0.0 | 0.0 | 0.0 | 0.0 | 0.1 | 0.0 | 0.0 | 0.0 | 0.0 | 0.0 | 0.0 |
| 1700030F18Rik | 0.1 | 0.0 | 0.0 | 0.0 | 0.1 | 0.0 | 0.0 | 0.0 | 0.0 | 0.0 | 0.0 | 0.0 |
| 1700030M09Rik | 0.0 | 0.0 | 0.0 | 0.0 | 0.1 | 0.1 | 0.0 | 0.0 | 0.0 | 0.0 | 0.0 | 0.0 |
| 1700030N03Rik | 0.0 | 0.0 | 0.0 | 0.0 | 0.1 | 0.0 | 0.0 | 0.0 | 0.0 | 0.0 | 0.2 | 0.0 |
| 1700030O20Rik | 0.0 | 0.0 | 0.0 | 0.0 | 0.0 | 0.0 | 0.0 | 0.0 | 0.0 | 0.0 | 0.0 | 0.0 |
| 1700031A10Rik | 0.0 | 0.0 | 0.0 | 0.0 | 0.0 | 0.0 | 0.0 | 0.0 | 0.0 | 0.0 | 0.0 | 0.0 |
| 1700036G14Rik | 0.0 | 0.0 | 0.0 | 0.0 | 0.0 | 0.0 | 0.0 | 0.0 | 0.0 | 0.0 | 0.0 | 0.0 |
| 1700040N02Rik | 0.0 | 0.0 | 0.0 | 0.1 | 0.0 | 0.0 | 0.0 | 0.0 | 0.0 | 0.0 | 0.0 | 0.0 |
| 1700042B14Rik | 0.0 | 0.0 | 0.0 | 0.1 | 0.0 | 0.0 | 0.0 | 0.0 | 0.0 | 0.1 | 0.0 | 0.1 |
| 1700045H11Rik | 0.0 | 0.0 | 0.0 | 0.0 | 0.0 | 0.0 | 0.0 | 0.0 | 0.0 | 0.0 | 0.0 | 0.0 |
| 1700047E10Rik | 0.0 | 0.0 | 0.0 | 0.0 | 0.0 | 0.0 | 0.0 | 0.0 | 0.0 | 0.1 | 0.0 | 0.0 |
| 1700049L16Rik | 0.0 | 0.0 | 0.0 | 0.0 | 0.0 | 0.0 | 0.0 | 0.0 | 0.0 | 0.0 | 0.0 | 0.1 |
| 1700051A21Rik | 0.0 | 0.0 | 0.0 | 0.0 | 0.0 | 0.1 | 0.0 | 0.0 | 0.0 | 0.0 | 0.0 | 0.0 |
| 1700054M17Rik | 0.0 | 0.0 | 0.0 | 0.0 | 0.0 | 0.0 | 0.1 | 0.0 | 0.0 | 0.0 | 0.0 | 0.0 |
| 1700060C20Rik | 0.0 | 0.0 | 0.0 | 0.0 | 0.0 | 0.0 | 0.0 | 0.0 | 0.1 | 0.0 | 0.0 | 0.0 |
| 1700064M15Rik | 0.0 | 0.0 | 0.0 | 0.0 | 0.1 | 0.0 | 0.0 | 0.0 | 0.0 | 0.0 | 0.0 | 0.1 |
| 1700065D16Rik | 0.1 | 0.2 | 0.0 | 0.0 | 0.0 | 0.0 | 0.0 | 0.1 | 0.0 | 0.0 | 0.0 | 0.0 |
| 1700065I17Rik | 0.0 | 0.0 | 0.0 | 0.0 | 0.0 | 0.0 | 0.0 | 0.0 | 0.0 | 0.0 | 0.0 | 0.0 |
| 1700065J11Rik | 0.0 | 0.1 | 0.0 | 0.0 | 0.0 | 0.1 | 0.0 | 0.1 | 0.0 | 0.1 | 0.0 | 0.0 |
| 1700065J18Rik | 0.0 | 0.1 | 0.0 | 0.0 | 0.0 | 0.0 | 0.0 | 0.0 | 0.0 | 0.0 | 0.0 | 0.0 |
| 1700066N21Rik | 0.0 | 0.0 | 0.0 | 0.0 | 0.2 | 0.0 | 0.0 | 0.0 | 0.0 | 0.0 | 0.0 | 0.0 |
| 1700067G17Rik | 0.0 | 0.0 | 0.0 | 0.0 | 0.0 | 0.0 | 0.0 | 0.0 | 0.0 | 0.0 | 0.0 | 0.0 |
| 1700069L16Rik | 0.0 | 0.0 | 0.0 | 0.0 | 0.0 | 0.0 | 0.0 | 0.0 | 0.0 | 0.1 | 0.0 | 0.0 |
| 1700072B07Rik | 0.0 | 0.1 | 0.0 | 0.0 | 0.0 | 0.0 | 0.0 | 0.0 | 0.0 | 0.0 | 0.0 | 0.0 |
| 1700072O05Rik | 0.0 | 0.0 | 0.0 | 0.0 | 0.0 | 0.0 | 0.0 | 0.0 | 0.0 | 0.7 | 0.0 | 0.0 |
| 1700074H08Rik | 0.0 | 0.1 | 0.0 | 0.0 | 0.1 | 0.0 | 0.0 | 0.1 | 0.1 | 0.0 | 0.0 | 0.0 |
| 1700081H04Rik | 0.0 | 0.0 | 0.0 | 0.0 | 0.0 | 0.0 | 0.0 | 0.0 | 0.0 | 0.0 | 0.1 | 0.0 |
| 1700085C21Rik | 0.0 | 0.0 | 0.0 | 0.0 | 0.0 | 0.0 | 0.0 | 0.0 | 0.0 | 0.0 | 0.0 | 0.0 |
| 1700086L19Rik | 0.0 | 0.0 | 0.0 | 0.0 | 0.1 | 0.0 | 0.0 | 0.0 | 0.1 | 0.0 | 0.0 | 0.0 |
| 1700091H14Rik | 0.1 | 0.0 | 0.0 | 0.0 | 0.0 | 0.0 | 0.0 | 0.0 | 0.0 | 0.0 | 0.0 | 0.0 |
| 1700092C02Rik | 0.0 | 0.0 | 0.0 | 0.0 | 0.1 | 0.0 | 0.0 | 0.0 | 0.0 | 0.0 | 0.0 | 0.0 |
| 1700092E19Rik | 0.0 | 0.0 | 0.0 | 0.0 | 0.0 | 0.0 | 0.0 | 0.0 | 0.0 | 0.0 | 0.0 | 0.0 |
| 1700092M07Rik | 0.0 | 0.2 | 0.0 | 0.2 | 0.1 | 0.0 | 0.0 | 0.0 | 0.1 | 0.0 | 0.0 | 0.5 |
| 1700095A21Rik | 0.0 | 0.0 | 0.0 | 0.0 | 0.0 | 0.0 | 0.0 | 0.0 | 0.0 | 0.0 | 0.0 | 0.0 |
| 1700095B10Rik | 0.0 | 0.0 | 0.0 | 0.0 | 0.0 | 0.0 | 0.0 | 0.0 | 0.0 | 0.0 | 0.0 | 0.0 |
| 1700096J18Rik | 0.0 | 0.0 | 0.0 | 0.0 | 0.3 | 0.0 | 0.0 | 0.0 | 0.1 | 0.0 | 0.0 | 0.0 |
| 1700097N02Rik | 0.0 | 0.0 | 0.1 | 0.0 | 0.0 | 0.0 | 0.0 | 0.0 | 0.0 | 0.0 | 0.0 | 0.1 |
| 1700100L14Rik | 0.0 | 0.0 | 0.0 | 0.0 | 0.1 | 0.0 | 0.0 | 0.0 | 0.0 | 0.0 | 0.0 | 0.0 |
| 1700102H20Rik | 0.0 | 0.3 | 0.0 | 0.0 | 0.0 | 0.0 | 0.1 | 0.0 | 0.0 | 0.0 | 0.1 | 0.0 |

Excluded Genes



|               |     |     |     |     |     |     |     |     |     |     |     |     |
|---------------|-----|-----|-----|-----|-----|-----|-----|-----|-----|-----|-----|-----|
| 1700104A03Rik | 0.0 | 0.0 | 0.0 | 0.0 | 0.0 | 0.0 | 0.0 | 0.0 | 0.0 | 0.0 | 0.0 | 0.0 |
| 1700108J01Rik | 0.0 | 0.0 | 0.0 | 0.0 | 0.0 | 0.0 | 0.0 | 0.0 | 0.0 | 0.0 | 0.0 | 0.0 |
| 1700109G14Rik | 0.0 | 0.0 | 0.0 | 0.0 | 0.0 | 0.0 | 0.0 | 0.0 | 0.0 | 0.0 | 0.0 | 0.0 |
| 1700110I01Rik | 0.0 | 0.0 | 0.0 | 0.0 | 0.0 | 0.0 | 0.0 | 0.0 | 0.0 | 0.0 | 0.0 | 0.0 |
| 1700110K17Rik | 0.1 | 0.0 | 0.0 | 0.1 | 0.0 | 0.0 | 0.0 | 0.0 | 0.0 | 0.0 | 0.0 | 0.0 |
| 1700112H15Rik | 0.0 | 0.0 | 0.0 | 0.0 | 0.0 | 0.0 | 0.0 | 0.0 | 0.0 | 0.0 | 0.0 | 0.0 |
| 1700112J05Rik | 0.0 | 0.1 | 0.0 | 0.0 | 0.0 | 0.0 | 0.0 | 0.0 | 0.0 | 0.0 | 0.2 | 0.0 |
| 1700113H08Rik | 0.0 | 0.1 | 0.0 | 0.0 | 0.0 | 0.0 | 0.0 | 0.0 | 0.0 | 0.0 | 0.0 | 0.0 |
| 1700119H24Rik | 0.0 | 0.0 | 0.1 | 0.0 | 0.0 | 0.0 | 0.0 | 0.0 | 0.1 | 0.0 | 0.0 | 0.0 |
| 1700120E14Rik | 0.0 | 0.0 | 0.0 | 0.0 | 0.0 | 0.0 | 0.0 | 0.0 | 0.0 | 0.0 | 0.0 | 0.0 |
| 1700122O11Rik | 0.0 | 0.0 | 0.0 | 0.0 | 0.0 | 0.0 | 0.0 | 0.0 | 0.0 | 0.0 | 0.0 | 0.0 |
| 1700123K08Rik | 0.0 | 0.0 | 0.0 | 0.0 | 0.0 | 0.0 | 0.0 | 0.0 | 0.0 | 0.0 | 0.0 | 0.0 |
| 1700123O21Rik | 0.0 | 0.0 | 0.0 | 0.0 | 0.1 | 0.0 | 0.0 | 0.0 | 0.0 | 0.0 | 0.0 | 0.0 |
| 1700126H18Rik | 0.0 | 0.0 | 0.0 | 0.0 | 0.0 | 0.0 | 0.0 | 0.0 | 0.0 | 0.0 | 0.0 | 0.0 |
| 1700128A07Rik | 0.0 | 0.1 | 0.0 | 0.0 | 0.0 | 0.0 | 0.0 | 0.0 | 0.0 | 0.0 | 0.2 | 0.0 |
| 1810006J02Rik | 0.0 | 0.0 | 0.0 | 0.0 | 0.0 | 0.0 | 0.0 | 0.0 | 0.0 | 0.0 | 0.0 | 0.0 |
| 1810009J06Rik | 0.0 | 0.0 | 0.0 | 0.0 | 0.0 | 0.0 | 0.0 | 0.0 | 0.0 | 0.0 | 0.0 | 0.0 |
| 1810013A23Rik | 0.0 | 0.0 | 0.1 | 0.0 | 0.1 | 0.0 | 0.0 | 0.0 | 0.0 | 0.1 | 0.0 | 0.0 |
| 1810035I16Rik | 0.0 | 0.0 | 0.0 | 0.0 | 0.0 | 0.0 | 0.0 | 0.0 | 0.0 | 0.0 | 0.0 | 0.0 |
| 1810046K07Rik | 0.0 | 0.0 | 0.0 | 0.0 | 0.0 | 0.0 | 0.0 | 0.0 | 0.0 | 0.0 | 0.0 | 0.0 |
| 1810053B23Rik | 0.0 | 0.0 | 0.0 | 0.0 | 0.0 | 0.0 | 0.0 | 0.0 | 0.1 | 0.0 | 0.0 | 0.0 |
| 2010005H15Rik | 0.0 | 0.0 | 0.0 | 0.0 | 0.1 | 0.0 | 0.0 | 0.1 | 0.0 | 0.1 | 0.0 | 0.0 |
| 2010106C02Rik | 0.1 | 0.0 | 0.0 | 0.2 | 0.0 | 0.2 | 0.7 | 0.0 | 0.1 | 0.0 | 0.0 | 0.0 |
| 2010106E10Rik | 0.1 | 0.0 | 0.0 | 0.0 | 0.0 | 0.0 | 0.0 | 0.0 | 0.0 | 0.0 | 0.0 | 0.0 |
| 2010109I03Rik | 0.0 | 0.0 | 0.0 | 0.0 | 0.0 | 0.0 | 0.0 | 0.0 | 0.0 | 0.0 | 0.0 | 0.0 |
| 2010308F09Rik | 0.0 | 0.0 | 0.0 | 0.3 | 0.0 | 0.0 | 0.0 | 0.0 | 0.0 | 0.2 | 0.0 | 0.0 |
| 2210409E12Rik | 0.0 | 0.0 | 0.0 | 0.0 | 0.0 | 0.0 | 0.0 | 0.0 | 0.0 | 0.0 | 0.2 | 0.0 |
| 2210414B05Rik | 0.0 | 0.0 | 0.0 | 0.0 | 0.0 | 0.0 | 0.0 | 0.0 | 0.0 | 0.0 | 0.0 | 0.0 |
| 2210417A02Rik | 0.0 | 0.0 | 0.0 | 0.1 | 0.0 | 0.0 | 0.0 | 0.0 | 0.0 | 0.0 | 0.0 | 0.0 |
| 2210420H20Rik | 0.0 | 0.0 | 0.0 | 0.0 | 0.0 | 0.0 | 0.0 | 0.0 | 0.0 | 0.0 | 0.0 | 0.0 |
| 2300002M23Rik | 0.0 | 0.0 | 0.0 | 0.0 | 0.0 | 0.0 | 0.0 | 0.0 | 0.0 | 0.0 | 0.0 | 0.0 |
| 2300005B03Rik | 0.1 | 0.0 | 0.0 | 0.0 | 0.0 | 0.0 | 0.0 | 0.0 | 0.0 | 0.1 | 0.0 | 0.1 |
| 2310002D06Rik | 0.2 | 0.0 | 0.0 | 0.0 | 0.0 | 0.0 | 0.1 | 0.0 | 0.0 | 0.0 | 0.0 | 0.0 |
| 2310002J15Rik | 0.0 | 0.0 | 0.0 | 0.0 | 0.0 | 0.0 | 0.0 | 0.0 | 0.0 | 0.0 | 0.0 | 0.0 |
| 2310002L09Rik | 0.0 | 0.0 | 0.0 | 0.0 | 0.0 | 0.0 | 0.0 | 0.0 | 0.0 | 0.0 | 0.0 | 0.0 |
| 2310007L24Rik | 0.0 | 0.0 | 0.0 | 0.0 | 0.0 | 0.0 | 0.0 | 0.0 | 0.0 | 0.0 | 0.0 | 0.0 |
| 2310015B20Rik | 0.0 | 0.0 | 0.0 | 0.0 | 0.1 | 0.0 | 0.0 | 0.0 | 0.0 | 0.0 | 0.4 | 0.3 |
| 2310034O05Rik | 0.1 | 0.0 | 0.0 | 0.0 | 0.0 | 0.0 | 0.0 | 0.0 | 0.0 | 0.0 | 0.0 | 0.0 |
| 2310042E22Rik | 0.1 | 0.0 | 0.0 | 0.0 | 0.0 | 0.0 | 0.0 | 0.0 | 0.0 | 0.0 | 0.0 | 0.0 |
| 2310043O21Rik | 0.0 | 0.0 | 0.0 | 0.0 | 0.0 | 0.0 | 0.0 | 0.0 | 0.0 | 0.0 | 0.0 | 0.0 |
| 2310050B05Rik | 0.0 | 0.0 | 0.0 | 0.6 | 0.0 | 0.0 | 0.0 | 0.0 | 0.0 | 0.0 | 0.0 | 0.0 |
| 2310050C09Rik | 0.0 | 0.0 | 0.0 | 0.0 | 0.0 | 0.0 | 0.0 | 0.0 | 0.0 | 0.0 | 0.0 | 0.0 |
| 2310069G16Rik | 0.1 | 0.1 | 0.0 | 0.0 | 0.0 | 0.0 | 0.0 | 0.0 | 0.0 | 0.1 | 0.0 | 0.0 |
| 2310081J21Rik | 0.0 | 0.0 | 0.0 | 0.0 | 0.0 | 0.0 | 0.0 | 0.1 | 0.0 | 0.0 | 0.0 | 0.0 |
| 2410007B07Rik | 0.0 | 0.0 | 0.0 | 0.0 | 0.0 | 0.0 | 0.0 | 0.0 | 0.0 | 0.0 | 0.0 | 0.0 |
| 2410012E07Rik | 0.0 | 0.0 | 0.0 | 0.0 | 0.0 | 0.0 | 0.0 | 0.0 | 0.0 | 0.0 | 0.0 | 0.0 |
| 2410017I17Rik | 0.0 | 0.0 | 0.0 | 0.0 | 0.0 | 0.0 | 0.0 | 0.0 | 0.0 | 0.0 | 0.0 | 0.0 |
| 2410124H12Rik | 0.0 | 0.0 | 0.0 | 0.0 | 0.1 | 0.1 | 0.0 | 0.0 | 0.0 | 0.0 | 0.0 | 0.0 |
| 2410137F16Rik | 0.0 | 0.0 | 0.0 | 0.0 | 0.0 | 0.0 | 0.0 | 0.0 | 0.0 | 0.0 | 0.0 | 0.0 |
| 2410137M14Rik | 0.0 | 0.0 | 0.0 | 0.0 | 0.0 | 0.0 | 0.0 | 0.0 | 0.0 | 0.0 | 0.0 | 0.0 |
| 2510003D18Rik | 0.0 | 0.0 | 0.1 | 0.0 | 0.0 | 0.0 | 0.0 | 0.0 | 0.0 | 0.1 | 0.0 | 0.0 |
| 2610016A17Rik | 0.0 | 0.2 | 0.0 | 0.0 | 0.2 | 0.0 | 0.0 | 0.0 | 0.0 | 0.0 | 0.0 | 0.0 |
| 2610017I09Rik | 0.0 | 0.0 | 0.0 | 0.0 | 0.0 | 0.0 | 0.0 | 0.0 | 0.0 | 0.0 | 0.0 | 0.0 |
| 2610028E06Rik | 0.0 | 0.0 | 0.0 | 0.0 | 0.0 | 0.0 | 0.0 | 0.0 | 0.0 | 0.0 | 0.0 | 0.0 |
| 2610028H24Rik | 0.0 | 0.0 | 0.0 | 0.0 | 0.0 | 0.0 | 0.0 | 0.0 | 0.0 | 0.0 | 0.0 | 0.0 |
| 2610034M16Rik | 0.0 | 0.0 | 0.0 | 0.0 | 0.0 | 0.0 | 0.0 | 0.0 | 0.0 | 0.0 | 0.0 | 0.1 |
| 2610100L16Rik | 0.0 | 0.0 | 0.0 | 0.0 | 0.0 | 0.0 | 0.0 | 0.0 | 0.0 | 0.0 | 0.0 | 0.0 |

Excluded Genes

|               |     |     |     |     |     |     |     |     |     |     |     |     |
|---------------|-----|-----|-----|-----|-----|-----|-----|-----|-----|-----|-----|-----|
| 2610206C17Rik | 0.0 | 0.0 | 0.0 | 0.0 | 0.0 | 0.0 | 0.0 | 0.0 | 0.0 | 0.0 | 0.0 | 0.0 |
| 2610316D01Rik | 0.0 | 0.0 | 0.0 | 0.0 | 0.0 | 0.0 | 0.0 | 0.0 | 0.0 | 0.0 | 0.0 | 0.0 |
| 2610528J11Rik | 0.0 | 0.0 | 0.0 | 0.0 | 0.0 | 0.0 | 0.0 | 0.0 | 0.0 | 0.0 | 0.0 | 0.0 |
| 2700046A07Rik | 0.0 | 0.0 | 0.0 | 0.0 | 0.0 | 0.0 | 0.0 | 0.0 | 0.0 | 0.0 | 0.0 | 0.0 |
| 2700086A05Rik | 0.0 | 0.0 | 0.0 | 0.0 | 0.0 | 0.0 | 0.0 | 0.0 | 0.0 | 0.1 | 0.0 | 0.0 |
| 2700089I24Rik | 0.0 | 0.0 | 0.0 | 0.0 | 0.0 | 0.0 | 0.0 | 0.0 | 0.0 | 0.0 | 0.0 | 0.0 |
| 2810011L19Rik | 0.0 | 0.0 | 0.0 | 0.0 | 0.0 | 0.0 | 0.0 | 0.0 | 0.0 | 0.0 | 0.0 | 0.0 |
| 2810404M03Rik | 0.0 | 0.0 | 0.0 | 0.0 | 0.1 | 0.0 | 0.2 | 0.0 | 0.0 | 0.1 | 0.0 | 0.0 |
| 2810471M01Rik | 0.0 | 0.0 | 0.0 | 0.0 | 0.0 | 0.0 | 0.0 | 0.0 | 0.0 | 0.0 | 0.0 | 0.0 |
| 2900052N01Rik | 0.0 | 0.0 | 0.0 | 0.0 | 0.0 | 0.0 | 0.0 | 0.0 | 0.0 | 0.0 | 0.0 | 0.0 |
| 2900055J20Rik | 0.2 | 0.0 | 0.0 | 0.0 | 0.0 | 0.1 | 0.0 | 0.1 | 0.0 | 0.0 | 0.0 | 0.0 |
| 2900079G21Rik | 0.0 | 0.0 | 0.0 | 0.0 | 0.0 | 0.0 | 0.0 | 0.0 | 0.0 | 0.0 | 0.0 | 0.0 |
| 2900092D14Rik | 0.0 | 0.0 | 0.0 | 0.0 | 0.0 | 0.0 | 0.0 | 0.0 | 0.0 | 0.0 | 0.0 | 0.0 |
| 3110039M20Rik | 0.1 | 0.0 | 0.0 | 0.0 | 0.1 | 0.1 | 0.0 | 0.1 | 0.0 | 0.0 | 0.0 | 0.0 |
| 3110079O15Rik | 0.0 | 0.0 | 0.0 | 0.0 | 0.0 | 0.0 | 0.0 | 0.0 | 0.0 | 0.0 | 0.1 | 0.0 |
| 3110099E03Rik | 0.1 | 0.0 | 0.0 | 0.0 | 0.0 | 0.0 | 0.0 | 0.0 | 0.0 | 0.0 | 0.0 | 0.0 |
| 3830417A13Rik | 0.1 | 0.0 | 0.0 | 0.3 | 0.0 | 0.0 | 0.0 | 0.0 | 0.0 | 0.0 | 0.0 | 0.0 |
| 4732456N10Rik | 0.0 | 0.0 | 0.0 | 0.0 | 0.0 | 0.0 | 0.0 | 0.0 | 0.0 | 0.0 | 0.0 | 0.0 |
| 4833423E24Rik | 0.0 | 0.0 | 0.0 | 0.0 | 0.0 | 0.0 | 0.0 | 0.0 | 0.0 | 0.0 | 0.0 | 0.0 |
| 4833424O15Rik | 0.0 | 0.0 | 0.0 | 0.0 | 0.0 | 0.0 | 0.0 | 0.0 | 0.0 | 0.0 | 0.0 | 0.0 |
| 4833428L15Rik | 0.0 | 0.0 | 0.0 | 0.0 | 0.0 | 0.0 | 0.0 | 0.0 | 0.0 | 0.0 | 0.0 | 0.0 |
| 4921508D12Rik | 0.1 | 0.0 | 0.0 | 0.1 | 0.0 | 0.0 | 0.1 | 0.0 | 0.0 | 0.0 | 0.0 | 0.0 |
| 4921509O07Rik | 0.0 | 0.0 | 0.0 | 0.0 | 0.0 | 0.0 | 0.1 | 0.0 | 0.0 | 0.0 | 0.0 | 0.0 |
| 4921511M17Rik | 0.0 | 0.0 | 0.0 | 0.0 | 0.0 | 0.0 | 0.0 | 0.0 | 0.0 | 0.0 | 0.0 | 0.0 |
| 4921515E04Rik | 0.0 | 0.0 | 0.0 | 0.0 | 0.0 | 0.0 | 0.0 | 0.0 | 0.0 | 0.0 | 0.0 | 0.0 |
| 4921524L21Rik | 0.0 | 0.0 | 0.0 | 0.0 | 0.0 | 0.0 | 0.0 | 0.0 | 0.0 | 0.0 | 0.0 | 0.0 |
| 4921531P14Rik | 0.0 | 0.0 | 0.0 | 0.0 | 0.1 | 0.0 | 0.0 | 0.0 | 0.0 | 0.3 | 0.0 | 0.0 |
| 4921533I20Rik | 0.0 | 0.0 | 0.0 | 0.0 | 0.0 | 0.0 | 0.0 | 0.0 | 0.0 | 0.0 | 0.0 | 0.0 |
| 4930401C15Rik | 0.0 | 0.0 | 0.0 | 0.0 | 0.1 | 0.0 | 0.0 | 0.0 | 0.0 | 0.0 | 0.0 | 0.0 |
| 4930402F06Rik | 0.0 | 0.0 | 0.0 | 0.0 | 0.0 | 0.0 | 0.0 | 0.0 | 0.0 | 0.0 | 0.0 | 0.0 |
| 4930405A10Rik | 0.0 | 0.1 | 0.0 | 0.0 | 0.0 | 0.0 | 0.0 | 0.0 | 0.0 | 0.0 | 0.0 | 0.0 |
| 4930405D11Rik | 0.0 | 0.0 | 0.0 | 0.0 | 0.0 | 0.0 | 0.0 | 0.0 | 0.0 | 0.0 | 0.0 | 0.0 |
| 4930407I10Rik | 0.0 | 0.0 | 0.0 | 0.0 | 0.0 | 0.0 | 0.0 | 0.0 | 0.0 | 0.0 | 0.0 | 0.0 |
| 4930408F14Rik | 0.0 | 0.0 | 0.0 | 0.1 | 0.0 | 0.0 | 0.0 | 0.0 | 0.0 | 0.0 | 0.0 | 0.0 |
| 4930412B13Rik | 0.0 | 0.0 | 0.0 | 0.0 | 0.0 | 0.0 | 0.0 | 0.0 | 0.0 | 0.0 | 0.0 | 0.0 |
| 4930412O13Rik | 0.0 | 0.0 | 0.0 | 0.0 | 0.0 | 0.0 | 0.0 | 0.0 | 0.0 | 0.0 | 0.0 | 0.0 |
| 4930413F20Rik | 0.0 | 0.0 | 0.1 | 0.0 | 0.0 | 0.0 | 0.0 | 0.0 | 0.0 | 0.0 | 0.0 | 0.0 |
| 4930415F15Rik | 0.0 | 0.1 | 0.0 | 0.0 | 0.0 | 0.1 | 0.0 | 0.0 | 0.0 | 0.0 | 0.0 | 0.0 |
| 4930417O13Rik | 0.0 | 0.0 | 0.0 | 0.0 | 0.0 | 0.0 | 0.0 | 0.0 | 0.0 | 0.0 | 0.0 | 0.0 |
| 4930419G24Rik | 0.0 | 0.0 | 0.0 | 0.0 | 0.0 | 0.0 | 0.0 | 0.0 | 0.0 | 0.0 | 0.0 | 0.0 |
| 4930426D05Rik | 0.0 | 0.0 | 0.0 | 0.1 | 0.0 | 0.0 | 0.0 | 0.0 | 0.0 | 0.0 | 0.0 | 0.0 |
| 4930428D18Rik | 0.0 | 0.0 | 0.0 | 0.0 | 0.0 | 0.0 | 0.0 | 0.0 | 0.0 | 0.0 | 0.0 | 0.0 |
| 4930429D17Rik | 0.0 | 0.0 | 0.0 | 0.0 | 0.0 | 0.0 | 0.0 | 0.0 | 0.0 | 0.0 | 0.0 | 0.0 |
| 4930429F11Rik | 0.0 | 0.0 | 0.0 | 0.0 | 0.0 | 0.0 | 0.0 | 0.0 | 0.0 | 0.0 | 0.0 | 0.0 |
| 4930430A15Rik | 0.0 | 0.0 | 0.0 | 0.0 | 0.0 | 0.0 | 0.0 | 0.0 | 0.0 | 0.0 | 0.0 | 0.0 |
| 4930430D24Rik | 0.0 | 0.0 | 0.0 | 0.0 | 0.0 | 0.0 | 0.0 | 0.0 | 0.0 | 0.0 | 0.0 | 0.0 |
| 4930430J02Rik | 0.0 | 0.0 | 0.0 | 0.0 | 0.2 | 0.0 | 0.0 | 0.0 | 0.0 | 0.0 | 0.0 | 0.0 |
| 4930432J09Rik | 0.0 | 0.0 | 0.0 | 0.0 | 0.0 | 0.0 | 0.0 | 0.0 | 0.0 | 0.0 | 0.0 | 0.0 |
| 4930432M17Rik | 0.0 | 0.0 | 0.0 | 0.0 | 0.0 | 0.0 | 0.0 | 0.0 | 0.0 | 0.0 | 0.0 | 0.0 |
| 4930433I11Rik | 0.0 | 0.0 | 0.0 | 0.0 | 0.0 | 0.0 | 0.0 | 0.0 | 0.0 | 0.0 | 0.0 | 0.0 |
| 4930433N12Rik | 0.0 | 0.0 | 0.0 | 0.0 | 0.0 | 0.0 | 0.0 | 0.0 | 0.0 | 0.0 | 0.0 | 0.0 |
| 4930438E09Rik | 0.0 | 0.0 | 0.0 | 0.0 | 0.0 | 0.0 | 0.0 | 0.1 | 0.0 | 0.1 | 0.0 | 0.1 |
| 4930444F02Rik | 0.0 | 0.1 | 0.0 | 0.0 | 0.0 | 0.0 | 0.0 | 0.0 | 0.0 | 0.0 | 0.0 | 0.0 |
| 4930444M15Rik | 0.0 | 0.0 | 0.0 | 0.0 | 0.0 | 0.0 | 0.0 | 0.0 | 0.0 | 0.0 | 0.0 | 0.0 |
| 4930444P10Rik | 0.1 | 0.1 | 0.0 | 0.0 | 0.0 | 0.0 | 0.0 | 0.0 | 0.1 | 0.0 | 0.0 | 0.0 |
| 4930447J18Rik | 0.0 | 0.0 | 0.0 | 0.0 | 0.0 | 0.0 | 0.0 | 0.0 | 0.0 | 0.0 | 0.0 | 0.0 |
| 4930448H16Rik | 0.0 | 0.0 | 0.1 | 0.1 | 0.0 | 0.1 | 0.2 | 0.0 | 0.0 | 0.0 | 0.0 | 0.1 |

Excluded Genes

|               |     |     |     |     |     |     |     |     |     |     |     |     |
|---------------|-----|-----|-----|-----|-----|-----|-----|-----|-----|-----|-----|-----|
| 4930448I18Rik | 0.1 | 0.0 | 0.0 | 0.0 | 0.0 | 0.0 | 0.0 | 0.0 | 0.0 | 0.0 | 0.0 | 0.0 |
| 4930449E01Rik | 0.1 | 0.0 | 0.0 | 0.0 | 0.0 | 0.0 | 0.0 | 0.0 | 0.0 | 0.0 | 0.0 | 0.0 |
| 4930451C15Rik | 0.0 | 0.0 | 0.0 | 0.0 | 0.0 | 0.0 | 0.0 | 0.0 | 0.0 | 0.0 | 0.1 | 0.0 |
| 4930455B14Rik | 0.0 | 0.0 | 0.0 | 0.0 | 0.0 | 0.0 | 0.0 | 0.0 | 0.0 | 0.0 | 0.0 | 0.0 |
| 4930455D15Rik | 0.0 | 0.0 | 0.1 | 0.0 | 0.0 | 0.0 | 0.0 | 0.0 | 0.0 | 0.0 | 0.0 | 0.0 |
| 4930455H04Rik | 0.0 | 0.0 | 0.0 | 0.0 | 0.0 | 0.0 | 0.0 | 0.0 | 0.0 | 0.0 | 0.0 | 0.0 |
| 4930456L15Rik | 0.0 | 0.0 | 0.0 | 0.0 | 0.0 | 0.0 | 0.0 | 0.0 | 0.0 | 0.0 | 0.0 | 0.0 |
| 4930459L07Rik | 0.0 | 0.0 | 0.0 | 0.0 | 0.0 | 0.0 | 0.0 | 0.0 | 0.0 | 0.0 | 0.0 | 0.0 |
| 4930461G14Rik | 0.2 | 0.0 | 0.0 | 0.2 | 0.0 | 0.0 | 0.0 | 0.0 | 0.0 | 0.0 | 0.0 | 0.0 |
| 4930467K11Rik | 0.0 | 0.0 | 0.2 | 0.0 | 0.0 | 0.0 | 0.0 | 0.0 | 0.0 | 0.0 | 0.0 | 0.1 |
| 4930468A15Rik | 0.0 | 0.0 | 0.0 | 0.0 | 0.0 | 0.0 | 0.0 | 0.0 | 0.0 | 0.0 | 0.0 | 0.0 |
| 4930469G21Rik | 0.0 | 0.0 | 0.0 | 0.1 | 0.0 | 0.0 | 0.0 | 0.0 | 0.0 | 0.0 | 0.0 | 0.0 |
| 4930471C04Rik | 0.0 | 0.0 | 0.0 | 0.1 | 0.0 | 0.0 | 0.0 | 0.0 | 0.0 | 0.0 | 0.0 | 0.0 |
| 4930471G03Rik | 0.0 | 0.0 | 0.0 | 0.0 | 0.1 | 0.0 | 0.0 | 0.0 | 0.0 | 0.0 | 0.0 | 0.0 |
| 4930474G06Rik | 0.0 | 0.0 | 0.0 | 0.0 | 0.0 | 0.0 | 0.0 | 0.0 | 0.0 | 0.0 | 0.0 | 0.0 |
| 4930474H20Rik | 0.0 | 0.0 | 0.0 | 0.0 | 0.0 | 0.0 | 0.0 | 0.0 | 0.0 | 0.0 | 0.0 | 0.0 |
| 4930474M22Rik | 0.0 | 0.0 | 0.0 | 0.0 | 0.1 | 0.0 | 0.0 | 0.0 | 0.1 | 0.0 | 0.0 | 0.0 |
| 4930474N09Rik | 0.0 | 0.0 | 0.0 | 0.0 | 0.0 | 0.0 | 0.0 | 0.0 | 0.0 | 0.0 | 0.0 | 0.0 |
| 4930483O08Rik | 0.0 | 0.0 | 0.0 | 0.0 | 0.1 | 0.1 | 0.0 | 0.0 | 0.0 | 0.0 | 0.0 | 0.0 |
| 4930486I03Rik | 0.0 | 0.0 | 0.1 | 0.0 | 0.0 | 0.0 | 0.0 | 0.0 | 0.0 | 0.0 | 0.0 | 0.0 |
| 4930500L23Rik | 0.0 | 0.0 | 0.0 | 0.0 | 0.0 | 0.0 | 0.0 | 0.1 | 0.0 | 0.0 | 0.0 | 0.0 |
| 4930503E14Rik | 0.0 | 0.0 | 0.0 | 0.0 | 0.0 | 0.0 | 0.0 | 0.0 | 0.0 | 0.0 | 0.0 | 0.0 |
| 4930503E24Rik | 0.0 | 0.0 | 0.0 | 0.0 | 0.0 | 0.0 | 0.0 | 0.0 | 0.1 | 0.0 | 0.0 | 0.0 |
| 4930503H13Rik | 0.0 | 0.0 | 0.0 | 0.0 | 0.0 | 0.0 | 0.0 | 0.0 | 0.0 | 0.0 | 0.0 | 0.0 |
| 4930505G20Rik | 0.0 | 0.0 | 0.0 | 0.0 | 0.0 | 0.0 | 0.0 | 0.0 | 0.0 | 0.0 | 0.0 | 0.0 |
| 4930511A02Rik | 0.0 | 0.0 | 0.0 | 0.0 | 0.0 | 0.0 | 0.0 | 0.0 | 0.0 | 0.0 | 0.0 | 0.0 |
| 4930511E03Rik | 0.0 | 0.0 | 0.0 | 0.0 | 0.0 | 0.0 | 0.0 | 0.0 | 0.0 | 0.0 | 0.0 | 0.0 |
| 4930513D17Rik | 0.0 | 0.0 | 0.0 | 0.0 | 0.0 | 0.0 | 0.0 | 0.1 | 0.0 | 0.0 | 0.0 | 0.0 |
| 4930513O06Rik | 0.0 | 0.1 | 0.0 | 0.0 | 0.0 | 0.0 | 0.0 | 0.0 | 0.0 | 0.0 | 0.0 | 0.0 |
| 4930517E11Rik | 0.0 | 0.0 | 0.0 | 0.0 | 0.0 | 0.0 | 0.0 | 0.0 | 0.0 | 0.0 | 0.0 | 0.0 |
| 4930519F16Rik | 0.0 | 0.0 | 0.1 | 0.0 | 0.0 | 0.0 | 0.1 | 0.0 | 0.0 | 0.0 | 0.0 | 0.0 |
| 4930520P13Rik | 0.0 | 0.0 | 0.0 | 0.0 | 0.0 | 0.0 | 0.0 | 0.0 | 0.0 | 0.1 | 0.0 | 0.0 |
| 4930522H14Rik | 0.0 | 0.0 | 0.0 | 0.0 | 0.0 | 0.0 | 0.0 | 0.0 | 0.0 | 0.0 | 0.0 | 0.0 |
| 4930522O17Rik | 0.0 | 0.0 | 0.0 | 0.0 | 0.0 | 0.1 | 0.0 | 0.0 | 0.0 | 0.0 | 0.0 | 0.0 |
| 4930524O05Rik | 0.1 | 0.0 | 0.0 | 0.0 | 0.0 | 0.0 | 0.0 | 0.0 | 0.0 | 0.0 | 0.0 | 0.0 |
| 4930524O08Rik | 0.0 | 0.0 | 0.0 | 0.0 | 0.0 | 0.0 | 0.0 | 0.0 | 0.0 | 0.0 | 0.0 | 0.0 |
| 4930525D18Rik | 0.0 | 0.0 | 0.0 | 0.0 | 0.0 | 0.0 | 0.0 | 0.0 | 0.0 | 0.0 | 0.0 | 0.0 |
| 4930526D03Rik | 0.1 | 0.0 | 0.0 | 0.0 | 0.0 | 0.0 | 0.0 | 0.0 | 0.0 | 0.0 | 0.0 | 0.0 |
| 4930526L06Rik | 0.0 | 0.0 | 0.0 | 0.0 | 0.1 | 0.0 | 0.0 | 0.0 | 0.0 | 0.0 | 0.0 | 0.0 |
| 4930527F14Rik | 0.0 | 0.0 | 0.0 | 0.1 | 0.0 | 0.0 | 0.0 | 0.0 | 0.0 | 0.0 | 0.0 | 0.0 |
| 4930527G23Rik | 0.0 | 0.0 | 0.0 | 0.0 | 0.0 | 0.0 | 0.0 | 0.0 | 0.0 | 0.0 | 0.0 | 0.0 |
| 4930529M08Rik | 0.0 | 0.0 | 0.0 | 0.1 | 0.0 | 0.0 | 0.0 | 0.0 | 0.0 | 0.0 | 0.0 | 0.1 |
| 4930533P14Rik | 0.0 | 0.0 | 0.0 | 0.0 | 0.0 | 0.0 | 0.0 | 0.0 | 0.0 | 0.0 | 0.0 | 0.0 |
| 4930539N22Rik | 0.0 | 0.0 | 0.0 | 0.0 | 0.0 | 0.0 | 0.0 | 0.0 | 0.0 | 0.0 | 0.0 | 0.0 |
| 4930542C21Rik | 0.0 | 0.0 | 0.0 | 0.0 | 0.0 | 0.0 | 0.0 | 0.0 | 0.0 | 0.0 | 0.0 | 0.0 |
| 4930542D17Rik | 0.0 | 0.0 | 0.0 | 0.0 | 0.0 | 0.0 | 0.0 | 0.0 | 0.0 | 0.0 | 0.0 | 0.0 |
| 4930542H20Rik | 0.0 | 0.0 | 0.0 | 0.0 | 0.0 | 0.0 | 0.0 | 0.0 | 0.0 | 0.0 | 0.0 | 0.0 |
| 4930543E12Rik | 0.0 | 0.0 | 0.0 | 0.0 | 0.0 | 0.0 | 0.0 | 0.0 | 0.0 | 0.0 | 0.0 | 0.0 |
| 4930544D05Rik | 0.0 | 0.0 | 0.0 | 0.0 | 0.1 | 0.0 | 0.0 | 0.0 | 0.0 | 0.0 | 0.0 | 0.0 |
| 4930544G11Rik | 0.0 | 0.0 | 0.0 | 0.0 | 0.0 | 0.0 | 0.0 | 0.0 | 0.0 | 0.0 | 0.0 | 0.0 |
| 4930544M13Rik | 0.0 | 0.0 | 0.0 | 0.0 | 0.0 | 0.0 | 0.0 | 0.0 | 0.0 | 0.0 | 0.0 | 0.0 |
| 4930545L23Rik | 0.0 | 0.0 | 0.0 | 0.0 | 0.0 | 0.0 | 0.0 | 0.0 | 0.0 | 0.0 | 0.0 | 0.0 |
| 4930546K05Rik | 0.0 | 0.0 | 0.0 | 0.0 | 0.0 | 0.0 | 0.0 | 0.0 | 0.0 | 0.0 | 0.0 | 0.0 |
| 4930547E14Rik | 0.0 | 0.0 | 0.0 | 0.0 | 0.0 | 0.0 | 0.0 | 0.0 | 0.1 | 0.0 | 0.0 | 0.0 |
| 4930548G14Rik | 0.0 | 0.0 | 0.0 | 0.0 | 0.0 | 0.0 | 0.0 | 0.0 | 0.0 | 0.0 | 0.0 | 0.0 |
| 4930548H24Rik | 0.0 | 0.0 | 0.0 | 0.0 | 0.0 | 0.0 | 0.0 | 0.0 | 0.0 | 0.1 | 0.0 | 0.0 |
| 4930550L24Rik | 0.0 | 0.0 | 0.0 | 0.1 | 0.0 | 0.0 | 0.0 | 0.0 | 0.0 | 0.0 | 0.0 | 0.0 |

Excluded Genes

|               |     |     |     |     |     |     |     |     |     |     |     |     |
|---------------|-----|-----|-----|-----|-----|-----|-----|-----|-----|-----|-----|-----|
| 4930552N02Rik | 0.0 | 0.0 | 0.0 | 0.0 | 0.0 | 0.0 | 0.0 | 0.0 | 0.0 | 0.0 | 0.0 | 0.0 |
| 4930553E22Rik | 0.0 | 0.0 | 0.0 | 0.2 | 0.0 | 0.0 | 0.0 | 0.0 | 0.0 | 0.0 | 0.0 | 0.0 |
| 4930555B11Rik | 0.0 | 0.0 | 0.0 | 0.0 | 0.0 | 0.0 | 0.0 | 0.0 | 0.0 | 0.0 | 0.0 | 0.0 |
| 4930556C24Rik | 0.0 | 0.0 | 0.0 | 0.0 | 0.0 | 0.0 | 0.0 | 0.0 | 0.1 | 0.0 | 0.1 | 0.0 |
| 4930556G01Rik | 0.0 | 0.0 | 0.0 | 0.0 | 0.0 | 0.0 | 0.0 | 0.0 | 0.0 | 0.0 | 0.0 | 0.0 |
| 4930557A04Rik | 0.0 | 0.0 | 0.0 | 0.0 | 0.0 | 0.0 | 0.0 | 0.0 | 0.0 | 0.0 | 0.0 | 0.0 |
| 4930557J02Rik | 0.0 | 0.0 | 0.0 | 0.0 | 0.0 | 0.0 | 0.0 | 0.0 | 0.0 | 0.0 | 0.0 | 0.0 |
| 4930558C23Rik | 0.0 | 0.0 | 0.0 | 0.0 | 0.0 | 0.0 | 0.0 | 0.0 | 0.0 | 0.1 | 0.0 | 0.0 |
| 4930558K02Rik | 0.0 | 0.0 | 0.0 | 0.0 | 0.0 | 0.0 | 0.0 | 0.0 | 0.0 | 0.0 | 0.0 | 0.0 |
| 4930563F08Rik | 0.0 | 0.0 | 0.0 | 0.0 | 0.0 | 0.0 | 0.0 | 0.0 | 0.0 | 0.0 | 0.0 | 0.0 |
| 4930564B18Rik | 0.0 | 0.0 | 0.0 | 0.0 | 0.0 | 0.0 | 0.0 | 0.0 | 0.0 | 0.0 | 0.0 | 0.0 |
| 4930564D02Rik | 0.0 | 0.0 | 0.0 | 0.0 | 0.0 | 0.0 | 0.0 | 0.0 | 0.1 | 0.0 | 0.0 | 0.1 |
| 4930564G21Rik | 0.0 | 0.1 | 0.0 | 0.0 | 0.0 | 0.0 | 0.0 | 0.0 | 0.0 | 0.0 | 0.0 | 0.0 |
| 4930564K09Rik | 0.0 | 0.0 | 0.0 | 0.0 | 0.0 | 0.0 | 0.0 | 0.0 | 0.0 | 0.0 | 0.0 | 0.0 |
| 4930565D16Rik | 0.0 | 0.0 | 0.0 | 0.1 | 0.0 | 0.0 | 0.0 | 0.0 | 0.0 | 0.0 | 0.0 | 0.0 |
| 4930567H12Rik | 0.0 | 0.0 | 0.0 | 0.0 | 0.0 | 0.0 | 0.0 | 0.0 | 0.0 | 0.0 | 0.0 | 0.0 |
| 4930567H17Rik | 0.0 | 0.0 | 0.0 | 0.0 | 0.0 | 0.0 | 0.0 | 0.0 | 0.0 | 0.0 | 0.0 | 0.0 |
| 4930568E12Rik | 0.0 | 0.0 | 0.0 | 0.0 | 0.0 | 0.0 | 0.0 | 0.0 | 0.0 | 0.0 | 0.0 | 0.0 |
| 4930568G15Rik | 0.0 | 0.0 | 0.0 | 0.0 | 0.0 | 0.0 | 0.0 | 0.0 | 0.0 | 0.0 | 0.0 | 0.0 |
| 4930572O03Rik | 0.0 | 0.0 | 0.0 | 0.0 | 0.0 | 0.0 | 0.0 | 0.0 | 0.0 | 0.0 | 0.0 | 0.0 |
| 4930572O13Rik | 0.0 | 0.0 | 0.0 | 0.0 | 0.0 | 0.0 | 0.0 | 0.0 | 0.0 | 0.0 | 0.0 | 0.0 |
| 4930573O16Rik | 0.0 | 0.0 | 0.0 | 0.0 | 0.0 | 0.2 | 0.0 | 0.0 | 0.0 | 0.0 | 0.0 | 0.0 |
| 4930578C19Rik | 0.0 | 0.0 | 0.0 | 0.0 | 0.0 | 0.0 | 0.0 | 0.0 | 0.1 | 0.0 | 0.0 | 0.0 |
| 4930578I06Rik | 0.0 | 0.1 | 0.0 | 0.1 | 0.0 | 0.0 | 0.0 | 0.0 | 0.0 | 0.0 | 0.0 | 0.0 |
| 4930578N18Rik | 0.0 | 0.0 | 0.0 | 0.0 | 0.0 | 0.0 | 0.0 | 0.0 | 0.0 | 0.0 | 0.0 | 0.0 |
| 4930579F01Rik | 0.0 | 0.1 | 0.0 | 0.0 | 0.0 | 0.0 | 0.0 | 0.0 | 0.0 | 0.0 | 0.0 | 0.0 |
| 4930583K01Rik | 0.0 | 0.0 | 0.0 | 0.0 | 0.0 | 0.1 | 0.0 | 0.0 | 0.0 | 0.0 | 0.0 | 0.0 |
| 4930584F24Rik | 0.0 | 0.0 | 0.0 | 0.0 | 0.0 | 0.0 | 0.0 | 0.0 | 0.0 | 0.0 | 0.0 | 0.0 |
| 4930590L20Rik | 0.0 | 0.0 | 0.2 | 0.0 | 0.0 | 0.0 | 0.0 | 0.0 | 0.0 | 0.0 | 0.0 | 0.1 |
| 4930593A02Rik | 0.0 | 0.0 | 0.0 | 0.0 | 0.0 | 0.0 | 0.0 | 0.0 | 0.0 | 0.0 | 0.0 | 0.0 |
| 4930593A02Rik | 0.0 | 0.0 | 0.0 | 0.0 | 0.0 | 0.0 | 0.0 | 0.0 | 0.0 | 0.0 | 0.0 | 0.0 |
| 4931406B18Rik | 0.0 | 0.0 | 0.0 | 0.0 | 0.0 | 0.0 | 0.0 | 0.0 | 0.0 | 0.0 | 0.0 | 0.0 |
| 4931409K22Rik | 0.0 | 0.0 | 0.0 | 0.0 | 0.0 | 0.0 | 0.0 | 0.0 | 0.0 | 0.0 | 0.0 | 0.0 |
| 4931417E11Rik | 0.0 | 0.0 | 0.0 | 0.0 | 0.0 | 0.0 | 0.0 | 0.0 | 0.0 | 0.0 | 0.0 | 0.0 |
| 4931423N10Rik | 0.0 | 0.0 | 0.0 | 0.0 | 0.0 | 0.0 | 0.0 | 0.0 | 0.0 | 0.0 | 0.0 | 0.0 |
| 4931428L18Rik | 0.0 | 0.1 | 0.0 | 0.0 | 0.0 | 0.0 | 0.0 | 0.0 | 0.0 | 0.0 | 0.0 | 0.0 |
| 4931429I11Rik | 0.0 | 0.0 | 0.0 | 0.0 | 0.0 | 0.0 | 0.0 | 0.0 | 0.0 | 0.0 | 0.0 | 0.0 |
| 4931429L15Rik | 0.0 | 0.0 | 0.0 | 0.0 | 0.0 | 0.0 | 0.0 | 0.0 | 0.0 | 0.0 | 0.0 | 0.0 |
| 4931440J10Rik | 0.0 | 0.0 | 0.0 | 0.0 | 0.0 | 0.1 | 0.0 | 0.0 | 0.1 | 0.0 | 0.0 | 0.1 |
| 4932411E22Rik | 0.0 | 0.0 | 0.0 | 0.0 | 0.0 | 0.0 | 0.0 | 0.0 | 0.0 | 0.0 | 0.0 | 0.0 |
| 4932411N23Rik | 0.0 | 0.0 | 0.0 | 0.0 | 0.0 | 0.0 | 0.0 | 0.0 | 0.0 | 0.0 | 0.0 | 0.0 |
| 4932412D23Rik | 0.0 | 0.0 | 0.0 | 0.0 | 0.0 | 0.0 | 0.0 | 0.0 | 0.0 | 0.0 | 0.0 | 0.0 |
| 4932414J04Rik | 0.0 | 0.0 | 0.0 | 0.0 | 0.0 | 0.0 | 0.0 | 0.0 | 0.0 | 0.0 | 0.0 | 0.0 |
| 4932414N04Rik | 0.0 | 0.0 | 0.0 | 0.0 | 0.0 | 0.0 | 0.0 | 0.0 | 0.0 | 0.0 | 0.0 | 0.0 |
| 4932415M13Rik | 0.0 | 0.0 | 0.0 | 0.0 | 0.0 | 0.0 | 0.0 | 0.0 | 0.0 | 0.0 | 0.0 | 0.0 |
| 4932416K20Rik | 0.0 | 0.0 | 0.0 | 0.0 | 0.0 | 0.0 | 0.0 | 0.0 | 0.0 | 0.0 | 0.0 | 0.0 |
| 4932443I19Rik | 0.0 | 0.0 | 0.0 | 0.0 | 0.0 | 0.0 | 0.0 | 0.1 | 0.0 | 0.0 | 0.0 | 0.1 |
| 4933400C23Rik | 0.0 | 0.0 | 0.0 | 0.0 | 0.0 | 0.0 | 0.0 | 0.0 | 0.0 | 0.0 | 0.0 | 0.0 |
| 4933400L20Rik | 0.0 | 0.0 | 0.0 | 0.0 | 0.0 | 0.0 | 0.0 | 0.0 | 0.3 | 0.0 | 0.0 | 0.0 |
| 4933401D09Rik | 0.0 | 0.0 | 0.0 | 0.0 | 0.0 | 0.0 | 0.1 | 0.0 | 0.0 | 0.0 | 0.0 | 0.0 |
| 4933401H06Rik | 0.0 | 0.0 | 0.0 | 0.0 | 0.0 | 0.0 | 0.0 | 0.0 | 0.0 | 0.1 | 0.0 | 0.0 |
| 4933402J07Rik | 0.0 | 0.0 | 0.0 | 0.0 | 0.0 | 0.0 | 0.0 | 0.0 | 0.0 | 0.0 | 0.0 | 0.0 |
| 4933402J15Rik | 0.0 | 0.0 | 0.0 | 0.1 | 0.0 | 0.0 | 0.0 | 0.0 | 0.0 | 0.0 | 0.0 | 0.0 |
| 4933402P03Rik | 0.0 | 0.0 | 0.0 | 0.0 | 0.0 | 0.0 | 0.0 | 0.0 | 0.0 | 0.0 | 0.0 | 0.0 |
| 4933405E24Rik | 0.0 | 0.0 | 0.0 | 0.0 | 0.0 | 0.0 | 0.0 | 0.0 | 0.0 | 0.0 | 0.0 | 0.0 |
| 4933406G16Rik | 0.0 | 0.0 | 0.0 | 0.0 | 0.0 | 0.0 | 0.0 | 0.0 | 0.0 | 0.0 | 0.0 | 0.0 |
| 4933406J08Rik | 0.0 | 0.0 | 0.0 | 0.0 | 0.0 | 0.0 | 0.0 | 0.0 | 0.0 | 0.0 | 0.0 | 0.0 |

Excluded Genes

|               |     |     |     |     |     |     |     |     |     |     |     |     |
|---------------|-----|-----|-----|-----|-----|-----|-----|-----|-----|-----|-----|-----|
| 4933406J10Rik | 0.0 | 0.0 | 0.0 | 0.0 | 0.0 | 0.0 | 0.0 | 0.0 | 0.0 | 0.0 | 0.1 | 0.0 |
| 4933407G14Rik | 0.0 | 0.0 | 0.0 | 0.0 | 0.0 | 0.0 | 0.0 | 0.0 | 0.0 | 0.0 | 0.0 | 0.0 |
| 4933407I05Rik | 0.0 | 0.0 | 0.0 | 0.0 | 0.0 | 0.0 | 0.0 | 0.0 | 0.0 | 0.0 | 0.0 | 0.0 |
| 4933407L21Rik | 0.0 | 0.0 | 0.0 | 0.0 | 0.0 | 0.0 | 0.0 | 0.0 | 0.0 | 0.0 | 0.0 | 0.0 |
| 4933409G03Rik | 0.0 | 0.0 | 0.0 | 0.1 | 0.0 | 0.0 | 0.0 | 0.0 | 0.0 | 0.0 | 0.0 | 0.0 |
| 4933413G19Rik | 0.0 | 0.0 | 0.0 | 0.0 | 0.0 | 0.0 | 0.0 | 0.0 | 0.0 | 0.0 | 0.0 | 0.0 |
| 4933415F23Rik | 0.0 | 0.0 | 0.0 | 0.0 | 0.0 | 0.0 | 0.0 | 0.0 | 0.0 | 0.0 | 0.0 | 0.0 |
| 4933416C03Rik | 0.0 | 0.0 | 0.0 | 0.0 | 0.0 | 0.0 | 0.0 | 0.0 | 0.0 | 0.0 | 0.0 | 0.0 |
| 4933416E03Rik | 0.0 | 0.0 | 0.0 | 0.0 | 0.0 | 0.0 | 0.0 | 0.0 | 0.0 | 0.0 | 0.0 | 0.0 |
| 4933416I08Rik | 0.0 | 0.0 | 0.0 | 0.0 | 0.0 | 0.1 | 0.0 | 0.0 | 0.0 | 0.0 | 0.0 | 0.0 |
| 4933422H20Rik | 0.0 | 0.0 | 0.0 | 0.1 | 0.0 | 0.1 | 0.0 | 0.0 | 0.0 | 0.0 | 0.0 | 0.0 |
| 4933425B07Rik | 0.0 | 0.0 | 0.0 | 0.0 | 0.0 | 0.0 | 0.0 | 0.0 | 0.0 | 0.0 | 0.0 | 0.0 |
| 4933425L06Rik | 0.0 | 0.0 | 0.0 | 0.0 | 0.0 | 0.0 | 0.0 | 0.0 | 0.0 | 0.0 | 0.0 | 0.0 |
| 4933427I22Rik | 0.0 | 0.0 | 0.0 | 0.0 | 0.0 | 0.0 | 0.0 | 0.0 | 0.0 | 0.0 | 0.0 | 0.0 |
| 4933428C19Rik | 0.0 | 0.0 | 0.0 | 0.0 | 0.0 | 0.0 | 0.0 | 0.0 | 0.0 | 0.0 | 0.0 | 0.0 |
| 4933429O19Rik | 0.0 | 0.0 | 0.0 | 0.0 | 0.0 | 0.0 | 0.0 | 0.0 | 0.0 | 0.0 | 0.0 | 0.0 |
| 4933430M04Rik | 0.0 | 0.0 | 0.0 | 0.0 | 0.0 | 0.0 | 0.0 | 0.0 | 0.0 | 0.1 | 0.0 | 0.1 |
| 4933430N04Rik | 0.0 | 0.0 | 0.0 | 0.0 | 0.0 | 0.0 | 0.0 | 0.0 | 0.0 | 0.0 | 0.0 | 0.0 |
| 4933432I03Rik | 0.0 | 0.0 | 0.0 | 0.0 | 0.0 | 0.0 | 0.0 | 0.0 | 0.0 | 0.0 | 0.0 | 0.0 |
| 4933433C11Rik | 0.0 | 0.0 | 0.1 | 0.0 | 0.0 | 0.0 | 0.0 | 0.0 | 0.0 | 0.0 | 0.0 | 0.1 |
| 4933434I20Rik | 0.0 | 0.0 | 0.0 | 0.0 | 0.0 | 0.0 | 0.0 | 0.0 | 0.0 | 0.0 | 0.0 | 0.0 |
| 4933436H12Rik | 0.0 | 0.0 | 0.0 | 0.0 | 0.0 | 0.1 | 0.0 | 0.0 | 0.0 | 0.0 | 0.0 | 0.0 |
| 4933438K21Rik | 0.0 | 0.1 | 0.0 | 0.0 | 0.0 | 0.0 | 0.0 | 0.0 | 0.0 | 0.0 | 0.0 | 0.0 |
| 5031425F14Rik | 0.0 | 0.0 | 0.0 | 0.0 | 0.1 | 0.0 | 0.0 | 0.0 | 0.0 | 0.0 | 0.0 | 0.0 |
| 5033403H07Rik | 0.0 | 0.0 | 0.0 | 0.0 | 0.0 | 0.2 | 0.0 | 0.0 | 0.0 | 0.0 | 0.0 | 0.0 |
| 5033404E19Rik | 0.0 | 0.0 | 0.0 | 0.1 | 0.0 | 0.0 | 0.0 | 0.0 | 0.0 | 0.0 | 0.0 | 0.0 |
| 5330413P13Rik | 0.0 | 0.0 | 0.0 | 0.0 | 0.0 | 0.0 | 0.0 | 0.0 | 0.0 | 0.0 | 0.0 | 0.0 |
| 5330434G04Rik | 0.0 | 0.0 | 0.0 | 0.0 | 0.0 | 0.0 | 0.0 | 0.0 | 0.0 | 0.0 | 0.0 | 0.0 |
| 5330439B14Rik | 0.0 | 0.0 | 0.0 | 0.0 | 0.0 | 0.0 | 0.0 | 0.0 | 0.0 | 0.0 | 0.0 | 0.0 |
| 5430421N21Rik | 0.0 | 0.0 | 0.0 | 0.0 | 0.0 | 0.0 | 0.0 | 0.0 | 0.0 | 0.0 | 0.0 | 0.0 |
| 5430425J12Rik | 0.0 | 0.0 | 0.0 | 0.0 | 0.0 | 0.0 | 0.0 | 0.0 | 0.0 | 0.0 | 0.0 | 0.0 |
| 5430428K19Rik | 0.0 | 0.0 | 0.0 | 0.0 | 0.0 | 0.0 | 0.1 | 0.0 | 0.0 | 0.0 | 0.0 | 0.0 |
| 5430440P10Rik | 0.0 | 0.0 | 0.0 | 0.0 | 0.0 | 0.0 | 0.0 | 0.0 | 0.0 | 0.0 | 0.0 | 0.0 |
| 5730403I07Rik | 0.0 | 0.0 | 0.0 | 0.0 | 0.0 | 0.0 | 0.0 | 0.0 | 0.0 | 0.0 | 0.0 | 0.0 |
| 5730420D15Rik | 0.0 | 0.1 | 0.0 | 0.0 | 0.0 | 0.0 | 0.0 | 0.1 | 0.0 | 0.0 | 0.0 | 0.0 |
| 5730522E02Rik | 0.0 | 0.0 | 0.0 | 0.0 | 0.0 | 0.0 | 0.0 | 0.0 | 0.0 | 0.0 | 0.0 | 0.0 |
| 5830403M04Rik | 0.0 | 0.0 | 0.0 | 0.0 | 0.0 | 0.0 | 0.0 | 0.0 | 0.0 | 0.0 | 0.0 | 0.0 |
| 5830411N06Rik | 0.0 | 0.0 | 0.0 | 0.0 | 0.0 | 0.0 | 0.0 | 0.0 | 0.0 | 0.0 | 0.0 | 0.0 |
| 5830428M24Rik | 0.0 | 0.1 | 0.0 | 0.0 | 0.0 | 0.0 | 0.0 | 0.0 | 0.0 | 0.0 | 0.0 | 0.0 |
| 5830416I19Rik | 0.0 | 0.0 | 0.0 | 0.0 | 0.0 | 0.0 | 0.0 | 0.0 | 0.0 | 0.0 | 0.0 | 0.0 |
| 5930412G12Rik | 0.0 | 0.0 | 0.0 | 0.1 | 0.0 | 0.0 | 0.0 | 0.0 | 0.0 | 0.0 | 0.0 | 0.0 |
| 5930438M14Rik | 0.0 | 0.0 | 0.0 | 0.0 | 0.0 | 0.0 | 0.0 | 0.0 | 0.0 | 0.0 | 0.0 | 0.0 |
| 6030440G07Rik | 0.0 | 0.0 | 0.0 | 0.0 | 0.1 | 0.0 | 0.0 | 0.0 | 0.0 | 0.0 | 0.0 | 0.0 |
| 6330410L21Rik | 0.0 | 0.0 | 0.0 | 0.0 | 0.0 | 0.0 | 0.0 | 0.0 | 0.0 | 0.0 | 0.0 | 0.0 |
| 6330415B21Rik | 0.0 | 0.0 | 0.0 | 0.0 | 0.0 | 0.0 | 0.0 | 0.0 | 0.0 | 0.0 | 0.0 | 0.0 |
| 7420461P10Rik | 0.0 | 0.0 | 0.0 | 0.0 | 0.0 | 0.1 | 0.0 | 0.1 | 0.0 | 0.0 | 0.0 | 0.0 |
| 7530416G11Rik | 0.0 | 0.0 | 0.0 | 0.1 | 0.0 | 0.0 | 0.0 | 0.0 | 0.0 | 0.0 | 0.0 | 0.0 |
| 8430437L04Rik | 0.0 | 0.0 | 0.0 | 0.0 | 0.0 | 0.0 | 0.0 | 0.0 | 0.0 | 0.0 | 0.0 | 0.0 |
| 9030204H09Rik | 0.0 | 0.0 | 0.0 | 0.0 | 0.0 | 0.2 | 0.0 | 0.0 | 0.0 | 0.0 | 0.1 | 0.0 |
| 9030404E10Rik | 0.0 | 0.0 | 0.0 | 0.0 | 0.0 | 0.0 | 0.0 | 0.0 | 0.0 | 0.0 | 0.0 | 0.0 |
| 9030619P08Rik | 0.0 | 0.0 | 0.0 | 0.0 | 0.0 | 0.0 | 0.0 | 0.0 | 0.0 | 0.0 | 0.0 | 0.0 |
| 9130015L21Rik | 0.0 | 0.0 | 0.0 | 0.0 | 0.0 | 0.0 | 0.0 | 0.0 | 0.0 | 0.0 | 0.0 | 0.0 |
| 9130204L05Rik | 0.0 | 0.1 | 0.0 | 0.0 | 0.0 | 0.0 | 0.0 | 0.0 | 0.0 | 0.0 | 0.0 | 0.0 |
| 9130230L23Rik | 0.0 | 0.0 | 0.0 | 0.0 | 0.0 | 0.0 | 0.0 | 0.0 | 0.0 | 0.0 | 0.0 | 0.0 |
| 9230105E05Rik | 0.0 | 0.0 | 0.0 | 0.0 | 0.0 | 0.0 | 0.0 | 0.0 | 0.0 | 0.0 | 0.0 | 0.0 |
| 9230112D13Rik | 0.0 | 0.0 | 0.0 | 0.0 | 0.0 | 0.0 | 0.0 | 0.0 | 0.0 | 0.0 | 0.0 | 0.1 |
| 9330158H04Rik | 0.0 | 0.0 | 0.0 | 0.0 | 0.0 | 0.0 | 0.0 | 0.0 | 0.0 | 0.0 | 0.0 | 0.0 |

Excluded Genes

|               |     |     |     |     |     |     |     |     |     |     |     |     |
|---------------|-----|-----|-----|-----|-----|-----|-----|-----|-----|-----|-----|-----|
| 9330178D15Rik | 0.0 | 0.0 | 0.0 | 0.0 | 0.0 | 0.0 | 0.0 | 0.0 | 0.0 | 0.0 | 0.0 | 0.0 |
| 9430019J16Rik | 0.0 | 0.0 | 0.0 | 0.0 | 0.0 | 0.0 | 0.0 | 0.0 | 0.0 | 0.0 | 0.0 | 0.0 |
| 9430021M05Rik | 0.0 | 0.0 | 0.0 | 0.0 | 0.0 | 0.0 | 0.0 | 0.0 | 0.0 | 0.0 | 0.0 | 0.0 |
| 9430069I07Rik | 0.0 | 0.0 | 0.0 | 0.0 | 0.0 | 0.0 | 0.0 | 0.3 | 0.1 | 0.0 | 0.1 | 0.0 |
| 9430076G02Rik | 0.0 | 0.0 | 0.0 | 0.0 | 0.0 | 0.0 | 0.0 | 0.0 | 0.0 | 0.0 | 0.0 | 0.0 |
| 9530003J23Rik | 0.0 | 0.0 | 0.0 | 0.0 | 0.1 | 0.0 | 0.1 | 0.0 | 0.0 | 0.0 | 0.0 | 0.0 |
| 9530036O11Rik | 0.0 | 0.0 | 0.0 | 0.0 | 0.0 | 0.0 | 0.0 | 0.0 | 0.0 | 0.0 | 0.0 | 0.0 |
| 9530048J24Rik | 0.0 | 0.0 | 0.1 | 0.0 | 0.0 | 0.0 | 0.0 | 0.0 | 0.0 | 0.0 | 0.0 | 0.0 |
| 9530080O11Rik | 0.0 | 0.0 | 0.0 | 0.0 | 0.0 | 0.0 | 0.0 | 0.0 | 0.0 | 0.0 | 0.0 | 0.0 |
| 9830107B12Rik | 0.0 | 0.0 | 0.0 | 0.0 | 0.0 | 0.0 | 0.0 | 0.0 | 0.0 | 0.0 | 0.0 | 0.0 |
| 9830166K06Rik | 0.0 | 0.0 | 0.0 | 0.0 | 0.0 | 0.0 | 0.0 | 0.0 | 0.0 | 0.0 | 0.0 | 0.0 |
| a             | 0.1 | 0.0 | 0.0 | 0.0 | 0.0 | 0.1 | 0.0 | 0.1 | 0.0 | 0.0 | 0.0 | 0.0 |
| A1cf          | 0.0 | 0.0 | 0.0 | 0.0 | 0.0 | 0.0 | 0.0 | 0.0 | 0.0 | 0.0 | 0.0 | 0.0 |
| A230001M10Rik | 0.0 | 0.0 | 0.0 | 0.0 | 0.0 | 0.0 | 0.0 | 0.1 | 0.0 | 0.0 | 0.0 | 0.0 |
| A230077H06Rik | 0.0 | 0.0 | 0.0 | 0.0 | 0.0 | 0.0 | 0.0 | 0.0 | 0.0 | 0.0 | 0.0 | 0.0 |
| A330050F15Rik | 0.0 | 0.0 | 0.0 | 0.0 | 0.0 | 0.0 | 0.0 | 0.0 | 0.0 | 0.0 | 0.0 | 0.0 |
| A330076C08Rik | 0.0 | 0.0 | 0.0 | 0.0 | 0.0 | 0.0 | 0.0 | 0.0 | 0.0 | 0.0 | 0.0 | 0.0 |
| A330093E20Rik | 0.0 | 0.0 | 0.0 | 0.0 | 0.0 | 0.0 | 0.0 | 0.0 | 0.0 | 0.0 | 0.0 | 0.0 |
| A430089I19Rik | 0.0 | 0.0 | 0.0 | 0.0 | 0.0 | 0.0 | 0.0 | 0.0 | 0.0 | 0.0 | 0.0 | 0.0 |
| A430093F15Rik | 0.0 | 0.0 | 0.0 | 0.0 | 0.1 | 0.0 | 0.1 | 0.0 | 0.0 | 0.0 | 0.0 | 0.0 |
| A530065N20Rik | 0.0 | 0.0 | 0.0 | 0.0 | 0.0 | 0.0 | 0.0 | 0.0 | 0.0 | 0.0 | 0.0 | 0.0 |
| A630010A05Rik | 0.0 | 0.0 | 0.0 | 0.0 | 0.0 | 0.0 | 0.0 | 0.0 | 0.0 | 0.0 | 0.0 | 0.0 |
| A630012P03Rik | 0.0 | 0.0 | 0.0 | 0.0 | 0.0 | 0.0 | 0.0 | 0.0 | 0.0 | 0.0 | 0.0 | 0.0 |
| A630073D07Rik | 0.0 | 0.0 | 0.0 | 0.0 | 0.0 | 0.0 | 0.0 | 0.0 | 0.0 | 0.0 | 0.0 | 0.0 |
| A630095N17Rik | 0.0 | 0.0 | 0.1 | 0.0 | 0.0 | 0.2 | 0.0 | 0.0 | 0.0 | 0.0 | 0.0 | 0.0 |
| A730017C20Rik | 0.0 | 0.0 | 0.0 | 0.0 | 0.0 | 0.0 | 0.0 | 0.0 | 0.0 | 0.0 | 0.0 | 0.0 |
| A730018C14Rik | 0.0 | 0.0 | 0.0 | 0.0 | 0.0 | 0.0 | 0.0 | 0.0 | 0.0 | 0.0 | 0.0 | 0.0 |
| A730020E08Rik | 0.0 | 0.0 | 0.0 | 0.0 | 0.0 | 0.0 | 0.0 | 0.1 | 0.0 | 0.0 | 0.0 | 0.0 |
| A730036I17Rik | 0.0 | 0.0 | 0.0 | 0.0 | 0.0 | 0.0 | 0.0 | 0.0 | 0.0 | 0.0 | 0.0 | 0.0 |
| A730046J19Rik | 0.0 | 0.0 | 0.0 | 0.0 | 0.0 | 0.0 | 0.0 | 0.0 | 0.0 | 0.0 | 0.0 | 0.0 |
| A730082K24Rik | 0.1 | 0.0 | 0.0 | 0.0 | 0.0 | 0.0 | 0.0 | 0.0 | 0.0 | 0.0 | 0.0 | 0.0 |
| A730085K08Rik | 0.0 | 0.2 | 0.0 | 0.0 | 0.0 | 0.0 | 0.0 | 0.0 | 0.2 | 0.2 | 0.0 | 0.0 |
| A930001A20Rik | 0.0 | 0.0 | 0.0 | 0.0 | 0.0 | 0.0 | 0.0 | 0.0 | 0.0 | 0.0 | 0.0 | 0.0 |
| A930011O12Rik | 0.0 | 0.0 | 0.0 | 0.0 | 0.0 | 0.0 | 0.0 | 0.0 | 0.0 | 0.0 | 0.0 | 0.0 |
| AA387883      | 0.0 | 0.0 | 0.0 | 0.0 | 0.0 | 0.0 | 0.0 | 0.0 | 0.0 | 0.0 | 0.0 | 0.0 |
| Aadacl2       | 0.0 | 0.0 | 0.0 | 0.0 | 0.0 | 0.0 | 0.0 | 0.0 | 0.0 | 0.0 | 0.0 | 0.0 |
| Abca14        | 0.0 | 0.0 | 0.0 | 0.0 | 0.0 | 0.0 | 0.0 | 0.0 | 0.0 | 0.0 | 0.0 | 0.0 |
| Abca15        | 0.0 | 0.0 | 0.0 | 0.0 | 0.0 | 0.0 | 0.0 | 0.0 | 0.0 | 0.0 | 0.0 | 0.0 |
| Abca16        | 0.0 | 0.0 | 0.0 | 0.0 | 0.0 | 0.0 | 0.0 | 0.0 | 0.0 | 0.0 | 0.0 | 0.0 |
| Abcc8         | 0.0 | 0.0 | 0.0 | 0.0 | 0.0 | 0.0 | 0.0 | 0.0 | 0.0 | 0.0 | 0.0 | 0.0 |
| Abcg5         | 0.0 | 0.0 | 0.0 | 0.0 | 0.0 | 0.0 | 0.0 | 0.0 | 0.0 | 0.0 | 0.0 | 0.0 |
| Abhd12b       | 0.0 | 0.0 | 0.0 | 0.0 | 0.0 | 0.1 | 0.0 | 0.0 | 0.0 | 0.0 | 0.0 | 0.0 |
| Accsl         | 0.0 | 0.0 | 0.0 | 0.0 | 0.0 | 0.0 | 0.0 | 0.0 | 0.0 | 0.0 | 0.0 | 0.0 |
| Ace3          | 0.0 | 0.0 | 0.0 | 0.0 | 0.0 | 0.0 | 0.0 | 0.0 | 0.0 | 0.0 | 0.0 | 0.0 |
| Acer1         | 0.0 | 0.0 | 0.0 | 0.0 | 0.0 | 0.0 | 0.0 | 0.0 | 0.0 | 0.0 | 0.0 | 0.0 |
| Acpt          | 0.0 | 0.0 | 0.0 | 0.0 | 0.0 | 0.0 | 0.0 | 0.0 | 0.0 | 0.0 | 0.0 | 0.0 |
| Acr           | 0.0 | 0.1 | 0.0 | 0.0 | 0.0 | 0.0 | 0.0 | 0.0 | 0.0 | 0.0 | 0.0 | 0.0 |
| Acrv1         | 0.0 | 0.0 | 0.0 | 0.0 | 0.0 | 0.0 | 0.0 | 0.0 | 0.0 | 0.0 | 0.0 | 0.0 |
| Acsbg2        | 0.0 | 0.0 | 0.0 | 0.0 | 0.0 | 0.0 | 0.0 | 0.0 | 0.0 | 0.0 | 0.0 | 0.0 |
| Acsm1         | 0.0 | 0.0 | 0.0 | 0.0 | 0.0 | 0.0 | 0.0 | 0.0 | 0.0 | 0.0 | 0.0 | 0.0 |
| Acsm2         | 0.0 | 0.0 | 0.0 | 0.0 | 0.0 | 0.0 | 0.0 | 0.0 | 0.0 | 0.0 | 0.0 | 0.0 |
| Acsm5         | 0.0 | 0.0 | 0.0 | 0.0 | 0.0 | 0.0 | 0.0 | 0.0 | 0.0 | 0.0 | 0.0 | 0.0 |
| Actbl2        | 0.0 | 0.0 | 0.0 | 0.0 | 0.0 | 0.0 | 0.0 | 0.0 | 0.0 | 0.0 | 0.0 | 0.0 |
| Actl6b        | 0.0 | 0.0 | 0.0 | 0.0 | 0.0 | 0.0 | 0.0 | 0.0 | 0.0 | 0.0 | 0.0 | 0.0 |
| Adad1         | 0.0 | 0.0 | 0.0 | 0.0 | 0.0 | 0.0 | 0.0 | 0.0 | 0.0 | 0.0 | 0.0 | 0.0 |
| Adad2         | 0.0 | 0.0 | 0.0 | 0.0 | 0.0 | 0.0 | 0.0 | 0.0 | 0.0 | 0.0 | 0.0 | 0.0 |
| Adam2         | 0.0 | 0.0 | 0.0 | 0.0 | 0.0 | 0.0 | 0.0 | 0.0 | 0.0 | 0.0 | 0.0 | 0.0 |

Excluded Genes

|          |     |     |     |     |     |     |     |     |     |     |     |     |
|----------|-----|-----|-----|-----|-----|-----|-----|-----|-----|-----|-----|-----|
| Adam20   | 0.0 | 0.0 | 0.0 | 0.0 | 0.0 | 0.0 | 0.0 | 0.0 | 0.0 | 0.0 | 0.0 | 0.0 |
| Adam24   | 0.0 | 0.0 | 0.0 | 0.0 | 0.0 | 0.0 | 0.0 | 0.0 | 0.0 | 0.0 | 0.0 | 0.0 |
| Adam25   | 0.0 | 0.0 | 0.0 | 0.0 | 0.0 | 0.0 | 0.0 | 0.0 | 0.0 | 0.0 | 0.0 | 0.0 |
| Adam26a  | 0.0 | 0.0 | 0.0 | 0.0 | 0.0 | 0.0 | 0.0 | 0.0 | 0.0 | 0.0 | 0.0 | 0.0 |
| Adam26b  | 0.0 | 0.0 | 0.0 | 0.0 | 0.0 | 0.0 | 0.0 | 0.0 | 0.0 | 0.0 | 0.0 | 0.0 |
| Adam30   | 0.0 | 0.0 | 0.0 | 0.0 | 0.0 | 0.0 | 0.0 | 0.0 | 0.0 | 0.0 | 0.0 | 0.0 |
| Adam6a   | 0.0 | 0.0 | 0.0 | 0.0 | 0.0 | 0.0 | 0.0 | 0.0 | 0.0 | 0.0 | 0.0 | 0.0 |
| Adam6b   | 0.0 | 0.0 | 0.0 | 0.0 | 0.0 | 0.0 | 0.0 | 0.0 | 0.0 | 0.0 | 0.0 | 0.0 |
| Adam7    | 0.0 | 0.0 | 0.0 | 0.1 | 0.0 | 0.0 | 0.0 | 0.0 | 0.0 | 0.0 | 0.0 | 0.0 |
| Adamdec1 | 0.0 | 0.0 | 0.0 | 0.0 | 0.0 | 0.0 | 0.0 | 0.0 | 0.0 | 0.0 | 0.0 | 0.0 |
| Adamts18 | 0.0 | 0.0 | 0.0 | 0.0 | 0.0 | 0.0 | 0.0 | 0.0 | 0.0 | 0.0 | 0.0 | 0.0 |
| Adarb2   | 0.0 | 0.0 | 0.0 | 0.0 | 0.0 | 0.0 | 0.0 | 0.0 | 0.0 | 0.0 | 0.0 | 0.0 |
| Adcyap1  | 0.0 | 0.0 | 0.0 | 0.0 | 0.0 | 0.0 | 0.0 | 0.0 | 0.0 | 0.0 | 0.0 | 0.0 |
| Adh6-ps1 | 0.0 | 0.0 | 0.0 | 0.0 | 0.0 | 0.0 | 0.0 | 0.0 | 0.0 | 0.0 | 0.0 | 0.0 |
| Adig     | 0.0 | 0.0 | 0.0 | 0.0 | 0.0 | 0.0 | 0.1 | 0.1 | 0.0 | 0.0 | 0.0 | 0.0 |
| Adipoq   | 0.0 | 0.0 | 0.0 | 0.0 | 0.0 | 0.0 | 0.0 | 0.0 | 0.0 | 0.0 | 0.1 | 0.1 |
| Adprhl1  | 0.0 | 0.0 | 0.0 | 0.0 | 0.0 | 0.0 | 0.0 | 0.0 | 0.0 | 0.0 | 0.0 | 0.1 |
| Adra2c   | 0.0 | 0.0 | 0.0 | 0.0 | 0.0 | 0.0 | 0.0 | 0.0 | 0.0 | 0.0 | 0.0 | 0.0 |
| AF529169 | 0.0 | 0.0 | 0.0 | 0.0 | 0.0 | 0.0 | 0.0 | 0.0 | 0.0 | 0.0 | 0.0 | 0.0 |
| Agmat    | 0.0 | 0.0 | 0.0 | 0.0 | 0.0 | 0.0 | 0.1 | 0.0 | 0.0 | 0.0 | 0.0 | 0.0 |
| Agxt2l1  | 0.0 | 0.0 | 0.0 | 0.0 | 0.0 | 0.0 | 0.0 | 0.0 | 0.0 | 0.0 | 0.0 | 0.0 |
| AI593442 | 0.0 | 0.0 | 0.0 | 0.0 | 0.0 | 0.0 | 0.0 | 0.0 | 0.0 | 0.0 | 0.0 | 0.0 |
| AI606473 | 0.0 | 0.0 | 0.0 | 0.0 | 0.0 | 0.0 | 0.0 | 0.0 | 0.0 | 0.1 | 0.0 | 0.0 |
| AI747448 | 0.0 | 0.0 | 0.0 | 0.0 | 0.0 | 0.0 | 0.0 | 0.0 | 0.0 | 0.0 | 0.0 | 0.0 |
| AI836003 | 0.0 | 0.0 | 0.0 | 0.0 | 0.0 | 0.0 | 0.0 | 0.1 | 0.0 | 0.0 | 0.0 | 0.0 |
| AI847159 | 0.0 | 0.0 | 0.0 | 0.1 | 0.0 | 0.0 | 0.0 | 0.0 | 0.0 | 0.0 | 0.0 | 0.0 |
| AI854517 | 0.0 | 0.0 | 0.0 | 0.0 | 0.0 | 0.0 | 0.0 | 0.0 | 0.0 | 0.0 | 0.0 | 0.0 |
| Aicda    | 0.0 | 0.0 | 0.0 | 0.0 | 0.0 | 0.0 | 0.0 | 0.0 | 0.0 | 0.0 | 0.0 | 0.0 |
| Aire     | 0.0 | 0.0 | 0.0 | 0.0 | 0.0 | 0.0 | 0.0 | 0.0 | 0.0 | 0.0 | 0.0 | 0.0 |
| Ajap1    | 0.0 | 0.0 | 0.0 | 0.0 | 0.0 | 0.0 | 0.0 | 0.0 | 0.0 | 0.0 | 0.0 | 0.0 |
| Akp3     | 0.0 | 0.0 | 0.0 | 0.0 | 0.0 | 0.1 | 0.0 | 0.0 | 0.0 | 0.0 | 0.0 | 0.0 |
| Akr1c20  | 0.0 | 0.0 | 0.0 | 0.0 | 0.0 | 0.0 | 0.0 | 0.0 | 0.0 | 0.0 | 0.0 | 0.0 |
| Akr1c21  | 0.0 | 0.0 | 0.0 | 0.0 | 0.0 | 0.0 | 0.0 | 0.0 | 0.0 | 0.0 | 0.0 | 0.0 |
| Akr1d1   | 0.0 | 0.0 | 0.0 | 0.0 | 0.0 | 0.0 | 0.0 | 0.0 | 0.0 | 0.0 | 0.0 | 0.0 |
| Alb      | 0.0 | 0.0 | 0.0 | 0.0 | 0.0 | 0.0 | 0.0 | 0.0 | 0.0 | 0.0 | 0.0 | 0.0 |
| Alox12b  | 0.0 | 0.0 | 0.0 | 0.0 | 0.0 | 0.0 | 0.0 | 0.0 | 0.0 | 0.0 | 0.0 | 0.0 |
| Alox15   | 0.0 | 0.0 | 0.0 | 0.0 | 0.0 | 0.0 | 0.0 | 0.0 | 0.0 | 0.0 | 0.0 | 0.0 |
| Alpi     | 0.0 | 0.0 | 0.0 | 0.0 | 0.0 | 0.0 | 0.0 | 0.0 | 0.0 | 0.0 | 0.0 | 0.0 |
| Alppl2   | 0.0 | 0.0 | 0.0 | 0.0 | 0.0 | 0.0 | 0.0 | 0.0 | 0.0 | 0.0 | 0.0 | 0.0 |
| Als2cr11 | 0.0 | 0.0 | 0.0 | 0.0 | 0.0 | 0.0 | 0.0 | 0.1 | 0.0 | 0.0 | 0.0 | 0.0 |
| Amelx    | 0.0 | 0.0 | 0.0 | 0.0 | 0.0 | 0.0 | 0.1 | 0.0 | 0.0 | 0.0 | 0.0 | 0.0 |
| Amer2    | 0.0 | 0.0 | 0.0 | 0.0 | 0.0 | 0.0 | 0.0 | 0.0 | 0.0 | 0.0 | 0.0 | 0.0 |
| Amer3    | 0.0 | 0.0 | 0.0 | 0.0 | 0.0 | 0.0 | 0.0 | 0.0 | 0.0 | 0.0 | 0.0 | 0.0 |
| Amy2a5   | 0.0 | 0.0 | 0.0 | 0.0 | 0.0 | 0.0 | 0.0 | 0.0 | 0.0 | 0.0 | 0.0 | 0.0 |
| Ang3     | 0.0 | 0.0 | 0.0 | 0.0 | 0.0 | 0.0 | 0.0 | 0.0 | 0.0 | 0.0 | 0.0 | 0.0 |
| Ang4     | 0.0 | 0.0 | 0.0 | 0.0 | 0.1 | 0.0 | 0.0 | 0.1 | 0.0 | 0.0 | 0.0 | 0.0 |
| Ang5     | 0.0 | 0.0 | 0.0 | 0.0 | 0.0 | 0.0 | 0.0 | 0.0 | 0.0 | 0.0 | 0.0 | 0.0 |
| Ankfn1   | 0.0 | 0.0 | 0.0 | 0.0 | 0.0 | 0.0 | 0.1 | 0.0 | 0.0 | 0.0 | 0.1 | 0.0 |
| Ankrd22  | 0.0 | 0.0 | 0.0 | 0.0 | 0.0 | 0.0 | 0.0 | 0.0 | 0.0 | 0.0 | 0.0 | 0.0 |
| Ankrd34b | 0.0 | 0.0 | 0.0 | 0.0 | 0.0 | 0.0 | 0.0 | 0.0 | 0.0 | 0.0 | 0.0 | 0.0 |
| Ankrd36  | 0.0 | 0.0 | 0.0 | 0.0 | 0.0 | 0.0 | 0.0 | 0.0 | 0.0 | 0.0 | 0.0 | 0.0 |
| Ankrd45  | 0.0 | 0.0 | 0.0 | 0.0 | 0.0 | 0.0 | 0.1 | 0.0 | 0.0 | 0.0 | 0.0 | 0.0 |
| Ankrd63  | 0.0 | 0.0 | 0.0 | 0.0 | 0.0 | 0.0 | 0.0 | 0.0 | 0.0 | 0.0 | 0.0 | 0.0 |
| Ankrd66  | 0.0 | 0.0 | 0.0 | 0.0 | 0.1 | 0.0 | 0.0 | 0.0 | 0.0 | 0.0 | 0.0 | 0.0 |
| Ankrd7   | 0.0 | 0.0 | 0.0 | 0.0 | 0.0 | 0.0 | 0.0 | 0.0 | 0.0 | 0.0 | 0.1 | 0.0 |
| Anks4b   | 0.0 | 0.0 | 0.0 | 0.0 | 0.0 | 0.0 | 0.0 | 0.0 | 0.0 | 0.0 | 0.0 | 0.0 |
| Ano9     | 0.0 | 0.0 | 0.0 | 0.0 | 0.0 | 0.0 | 0.0 | 0.0 | 0.0 | 0.0 | 0.0 | 0.0 |

Excluded Genes

|               |     |     |     |     |     |     |     |     |     |     |     |     |
|---------------|-----|-----|-----|-----|-----|-----|-----|-----|-----|-----|-----|-----|
| Antxr1        | 0.0 | 0.0 | 0.0 | 0.0 | 0.1 | 0.0 | 0.0 | 0.0 | 0.0 | 0.0 | 0.0 | 0.0 |
| Anxa10        | 0.0 | 0.0 | 0.0 | 0.0 | 0.0 | 0.0 | 0.0 | 0.0 | 0.0 | 0.0 | 0.0 | 0.0 |
| Anxa13        | 0.0 | 0.0 | 0.0 | 0.0 | 0.1 | 0.0 | 0.0 | 0.0 | 0.0 | 0.0 | 0.0 | 0.0 |
| Apcs          | 0.0 | 0.0 | 0.0 | 0.0 | 0.0 | 0.0 | 0.0 | 0.0 | 0.0 | 0.0 | 0.0 | 0.0 |
| Apoa1         | 0.0 | 0.0 | 0.0 | 0.0 | 0.0 | 0.0 | 0.0 | 0.0 | 0.0 | 0.0 | 0.0 | 0.0 |
| Apobec4       | 0.0 | 0.0 | 0.0 | 0.0 | 0.0 | 0.0 | 0.0 | 0.0 | 0.0 | 0.0 | 0.0 | 0.0 |
| Apol10a       | 0.0 | 0.0 | 0.0 | 0.0 | 0.0 | 0.0 | 0.0 | 0.0 | 0.0 | 0.0 | 0.0 | 0.0 |
| Apol11a       | 0.0 | 0.0 | 0.0 | 0.0 | 0.0 | 0.0 | 0.0 | 0.0 | 0.0 | 0.0 | 0.0 | 0.0 |
| Apon          | 0.0 | 0.0 | 0.0 | 0.0 | 0.1 | 0.0 | 0.0 | 0.0 | 0.0 | 0.0 | 0.0 | 0.0 |
| Aqp12         | 0.1 | 0.0 | 0.0 | 0.0 | 0.0 | 0.0 | 0.0 | 0.0 | 0.0 | 0.0 | 0.0 | 0.0 |
| Aqp8          | 0.0 | 0.0 | 0.0 | 0.0 | 0.0 | 0.0 | 0.0 | 0.0 | 0.0 | 0.0 | 0.0 | 0.0 |
| Arhgap36      | 0.0 | 0.0 | 0.0 | 0.0 | 0.0 | 0.0 | 0.0 | 0.0 | 0.0 | 0.0 | 0.0 | 0.0 |
| Arhgap40      | 0.0 | 0.0 | 0.0 | 0.0 | 0.0 | 0.0 | 0.0 | 0.0 | 0.0 | 0.0 | 0.0 | 0.0 |
| Arid3c        | 0.0 | 0.0 | 0.0 | 0.0 | 0.0 | 0.0 | 0.0 | 0.0 | 0.0 | 0.0 | 0.0 | 0.0 |
| Arl13a        | 0.0 | 0.0 | 0.0 | 0.0 | 0.0 | 0.1 | 0.0 | 0.0 | 0.0 | 0.0 | 0.0 | 0.0 |
| Arl9          | 0.0 | 0.0 | 0.0 | 0.0 | 0.1 | 0.0 | 0.0 | 0.0 | 0.1 | 0.0 | 0.0 | 0.0 |
| Armc3         | 0.0 | 0.0 | 0.0 | 0.0 | 0.0 | 0.0 | 0.0 | 0.0 | 0.0 | 0.0 | 0.0 | 0.0 |
| Armc4         | 0.0 | 0.0 | 0.0 | 0.0 | 0.0 | 0.0 | 0.0 | 0.0 | 0.0 | 0.0 | 0.0 | 0.0 |
| Arrdc5        | 0.0 | 0.0 | 0.0 | 0.0 | 0.0 | 0.0 | 0.0 | 0.0 | 0.0 | 0.0 | 0.0 | 0.1 |
| Art1          | 0.0 | 0.0 | 0.0 | 0.0 | 0.0 | 0.0 | 0.0 | 0.0 | 0.0 | 0.0 | 0.0 | 0.0 |
| Art2a-ps      | 0.0 | 0.1 | 0.0 | 0.0 | 0.0 | 0.0 | 0.0 | 0.0 | 0.0 | 0.0 | 0.0 | 0.0 |
| Art2b         | 0.0 | 0.0 | 0.0 | 0.0 | 0.0 | 0.0 | 0.0 | 0.0 | 0.0 | 0.0 | 0.0 | 0.0 |
| Asb10         | 0.0 | 0.0 | 0.0 | 0.0 | 0.0 | 0.0 | 0.0 | 0.0 | 0.0 | 0.0 | 0.0 | 0.0 |
| Asb11         | 0.0 | 0.0 | 0.0 | 0.0 | 0.0 | 0.0 | 0.0 | 0.0 | 0.0 | 0.0 | 0.0 | 0.0 |
| Asb12         | 0.0 | 0.0 | 0.0 | 0.0 | 0.0 | 0.0 | 0.0 | 0.0 | 0.0 | 0.0 | 0.0 | 0.0 |
| Asb17         | 0.0 | 0.0 | 0.0 | 0.0 | 0.0 | 0.0 | 0.0 | 0.0 | 0.0 | 0.0 | 0.1 | 0.0 |
| Asb9          | 0.1 | 0.0 | 0.0 | 0.0 | 0.0 | 0.0 | 0.0 | 0.0 | 0.0 | 0.0 | 0.0 | 0.0 |
| Ascl1         | 0.0 | 0.0 | 0.0 | 0.0 | 0.0 | 0.0 | 0.0 | 0.0 | 0.0 | 0.0 | 0.0 | 0.0 |
| Ascl5         | 0.0 | 0.0 | 0.0 | 0.0 | 0.0 | 0.0 | 0.0 | 0.0 | 0.0 | 0.0 | 0.0 | 0.0 |
| Asgr2         | 0.0 | 0.0 | 0.0 | 0.0 | 0.0 | 0.0 | 0.0 | 0.0 | 0.0 | 0.0 | 0.0 | 0.0 |
| Asic2         | 0.0 | 0.0 | 0.0 | 0.1 | 0.0 | 0.0 | 0.0 | 0.0 | 0.0 | 0.0 | 0.0 | 0.0 |
| Asic4         | 0.0 | 0.0 | 0.0 | 0.0 | 0.0 | 0.0 | 0.0 | 0.0 | 0.0 | 0.0 | 0.0 | 0.0 |
| Asmt          | 0.0 | 0.0 | 0.0 | 0.0 | 0.0 | 0.0 | 0.0 | 0.0 | 0.0 | 0.0 | 0.0 | 0.0 |
| Aspdh         | 0.1 | 0.0 | 0.0 | 0.0 | 0.0 | 0.0 | 0.0 | 0.0 | 0.0 | 0.0 | 0.0 | 0.0 |
| Asphd1        | 0.0 | 0.0 | 0.0 | 0.0 | 0.0 | 0.0 | 0.0 | 0.0 | 0.0 | 0.0 | 0.0 | 0.0 |
| Atoh1         | 0.0 | 0.0 | 0.0 | 0.0 | 0.0 | 0.0 | 0.0 | 0.0 | 0.0 | 0.0 | 0.0 | 0.0 |
| Atp13a4       | 0.0 | 0.0 | 0.0 | 0.0 | 0.0 | 0.0 | 0.0 | 0.0 | 0.0 | 0.0 | 0.0 | 0.0 |
| Atp2b3        | 0.0 | 0.0 | 0.0 | 0.0 | 0.0 | 0.0 | 0.0 | 0.0 | 0.0 | 0.0 | 0.0 | 0.0 |
| Atp2c2        | 0.0 | 0.0 | 0.0 | 0.0 | 0.0 | 0.0 | 0.0 | 0.0 | 0.0 | 0.0 | 0.0 | 0.0 |
| Atp4b         | 0.0 | 0.0 | 0.0 | 0.0 | 0.0 | 0.0 | 0.0 | 0.0 | 0.0 | 0.0 | 0.0 | 0.0 |
| AU018091      | 0.0 | 0.0 | 0.0 | 0.0 | 0.0 | 0.0 | 0.0 | 0.0 | 0.0 | 0.0 | 0.0 | 0.0 |
| AU018829      | 0.0 | 0.0 | 0.0 | 0.0 | 0.0 | 0.0 | 0.0 | 0.0 | 0.0 | 0.0 | 0.0 | 0.0 |
| AU019990      | 0.0 | 0.0 | 0.0 | 0.1 | 0.0 | 0.0 | 0.1 | 0.0 | 0.0 | 0.0 | 0.0 | 0.0 |
| AU022751      | 0.0 | 0.0 | 0.0 | 0.0 | 0.0 | 0.0 | 0.0 | 0.0 | 0.0 | 0.0 | 0.0 | 0.0 |
| Avpr2         | 0.0 | 0.0 | 0.0 | 0.0 | 0.1 | 0.0 | 0.0 | 0.1 | 0.0 | 0.0 | 0.0 | 0.0 |
| AW549542      | 0.0 | 0.0 | 0.0 | 0.0 | 0.0 | 0.0 | 0.0 | 0.0 | 0.0 | 0.0 | 0.0 | 0.0 |
| Azgp1         | 0.1 | 0.0 | 0.0 | 0.0 | 0.0 | 0.0 | 0.1 | 0.0 | 0.0 | 0.0 | 0.0 | 0.0 |
| B020004C17Rik | 0.0 | 0.0 | 0.0 | 0.0 | 0.0 | 0.0 | 0.0 | 0.0 | 0.0 | 0.0 | 0.0 | 0.0 |
| B020014A21Rik | 0.0 | 0.0 | 0.0 | 0.0 | 0.0 | 0.0 | 0.0 | 0.0 | 0.0 | 0.0 | 0.1 | 0.0 |
| B230119M05Rik | 0.0 | 0.0 | 0.0 | 0.0 | 0.0 | 0.0 | 0.0 | 0.0 | 0.1 | 0.0 | 0.0 | 0.0 |
| B230209E15Rik | 0.0 | 0.0 | 0.0 | 0.0 | 0.0 | 0.0 | 0.0 | 0.0 | 0.0 | 0.0 | 0.0 | 0.0 |
| B230312C02Rik | 0.0 | 0.0 | 0.0 | 0.0 | 0.0 | 0.0 | 0.0 | 0.0 | 0.0 | 0.0 | 0.0 | 0.0 |
| B230323A14Rik | 0.0 | 0.0 | 0.0 | 0.0 | 0.0 | 0.0 | 0.0 | 0.0 | 0.0 | 0.0 | 0.0 | 0.0 |
| B4galnt4      | 0.0 | 0.0 | 0.0 | 0.0 | 0.0 | 0.0 | 0.0 | 0.0 | 0.0 | 0.0 | 0.0 | 0.0 |
| B830017H08Rik | 0.0 | 0.0 | 0.0 | 0.0 | 0.0 | 0.0 | 0.0 | 0.0 | 0.0 | 0.1 | 0.0 | 0.0 |
| B930018H19Rik | 0.1 | 0.0 | 0.0 | 0.0 | 0.1 | 0.0 | 0.1 | 0.0 | 0.0 | 0.0 | 0.0 | 0.1 |
| B930092H01Rik | 0.0 | 0.0 | 0.0 | 0.0 | 0.0 | 0.0 | 0.0 | 0.0 | 0.0 | 0.0 | 0.0 | 0.0 |

Excluded Genes



|               |     |     |     |     |     |     |     |     |     |     |     |     |
|---------------|-----|-----|-----|-----|-----|-----|-----|-----|-----|-----|-----|-----|
| Baat          | 0.0 | 0.0 | 0.0 | 0.0 | 0.0 | 0.0 | 0.0 | 0.0 | 0.0 | 0.0 | 0.0 | 0.0 |
| Barhl2        | 0.0 | 0.0 | 0.0 | 0.0 | 0.0 | 0.0 | 0.0 | 0.0 | 0.0 | 0.0 | 0.0 | 0.0 |
| BB014433      | 0.0 | 0.0 | 0.0 | 0.0 | 0.0 | 0.0 | 0.0 | 0.0 | 0.0 | 0.0 | 0.0 | 0.0 |
| BB019430      | 0.0 | 0.0 | 0.0 | 0.0 | 0.0 | 0.0 | 0.0 | 0.0 | 0.0 | 0.0 | 0.0 | 0.0 |
| BB123696      | 0.0 | 0.0 | 0.0 | 0.0 | 0.0 | 0.0 | 0.0 | 0.0 | 0.0 | 0.0 | 0.0 | 0.0 |
| BB283400      | 0.0 | 0.0 | 0.0 | 0.0 | 0.0 | 0.0 | 0.0 | 0.0 | 0.0 | 0.0 | 0.0 | 0.0 |
| BB557941      | 0.1 | 0.0 | 0.1 | 0.0 | 0.0 | 0.2 | 0.0 | 0.0 | 0.0 | 0.0 | 0.1 | 0.0 |
| BC021614      | 0.0 | 0.0 | 0.0 | 0.0 | 0.0 | 0.0 | 0.0 | 0.0 | 0.0 | 0.0 | 0.0 | 0.0 |
| BC027072      | 0.0 | 0.0 | 0.0 | 0.0 | 0.0 | 0.0 | 0.0 | 0.0 | 0.0 | 0.0 | 0.0 | 0.0 |
| BC030870      | 0.1 | 0.0 | 0.0 | 0.0 | 0.0 | 0.0 | 0.0 | 0.0 | 0.0 | 0.0 | 0.0 | 0.0 |
| BC039966      | 0.0 | 0.1 | 0.0 | 0.0 | 0.0 | 0.0 | 0.0 | 0.0 | 0.0 | 0.0 | 0.0 | 0.0 |
| BC048502      | 0.0 | 0.0 | 0.0 | 0.0 | 0.0 | 0.0 | 0.0 | 0.0 | 0.0 | 0.0 | 0.0 | 0.0 |
| BC048507      | 0.1 | 0.0 | 0.0 | 0.0 | 0.0 | 0.0 | 0.0 | 0.0 | 0.0 | 0.0 | 0.0 | 0.0 |
| BC048609      | 0.2 | 0.0 | 0.0 | 0.0 | 0.2 | 0.0 | 0.0 | 0.4 | 0.0 | 0.1 | 0.0 | 0.0 |
| BC048679      | 0.0 | 0.0 | 0.0 | 0.0 | 0.0 | 0.0 | 0.0 | 0.0 | 0.0 | 0.0 | 0.0 | 0.0 |
| BC049352      | 0.0 | 0.0 | 0.0 | 0.0 | 0.1 | 0.0 | 0.0 | 0.0 | 0.0 | 0.0 | 0.0 | 0.0 |
| BC049635      | 0.0 | 0.0 | 0.1 | 0.0 | 0.0 | 0.0 | 0.0 | 0.1 | 0.0 | 0.0 | 0.0 | 0.0 |
| BC080695      | 0.0 | 0.0 | 0.0 | 0.0 | 0.0 | 0.0 | 0.0 | 0.0 | 0.0 | 0.0 | 0.0 | 0.0 |
| BC089491      | 0.0 | 0.0 | 0.0 | 0.0 | 0.0 | 0.3 | 0.0 | 0.0 | 0.0 | 0.0 | 0.0 | 0.0 |
| BC089597      | 0.0 | 0.1 | 0.0 | 0.0 | 0.0 | 0.0 | 0.0 | 0.0 | 0.0 | 0.0 | 0.0 | 0.0 |
| BC094916      | 0.0 | 0.0 | 0.0 | 0.0 | 0.0 | 0.0 | 0.0 | 0.0 | 0.0 | 0.0 | 0.0 | 0.0 |
| BC107364      | 0.0 | 0.0 | 0.0 | 0.2 | 0.0 | 0.0 | 0.0 | 0.1 | 0.0 | 0.0 | 0.0 | 0.0 |
| BC147527      | 0.0 | 0.0 | 0.0 | 0.0 | 0.0 | 0.0 | 0.0 | 0.0 | 0.0 | 0.0 | 0.0 | 0.0 |
| Bcl11a        | 0.0 | 0.0 | 0.0 | 0.0 | 0.0 | 0.0 | 0.0 | 0.0 | 0.0 | 0.0 | 0.0 | 0.0 |
| Bcl2a1c       | 0.0 | 0.0 | 0.0 | 0.0 | 0.4 | 0.0 | 0.0 | 0.0 | 0.0 | 0.0 | 0.0 | 0.0 |
| Bdkrb2        | 0.0 | 0.0 | 0.0 | 0.0 | 0.0 | 0.0 | 0.0 | 0.0 | 0.0 | 0.0 | 0.0 | 0.0 |
| Bend5         | 0.0 | 0.0 | 0.0 | 0.0 | 0.0 | 0.0 | 0.0 | 0.0 | 0.0 | 0.0 | 0.0 | 0.0 |
| Best2         | 0.0 | 0.0 | 0.0 | 0.0 | 0.0 | 0.0 | 0.0 | 0.0 | 0.0 | 0.0 | 0.0 | 0.0 |
| Bglap3        | 0.0 | 0.0 | 0.0 | 0.1 | 0.1 | 0.0 | 0.0 | 0.0 | 0.0 | 0.1 | 0.0 | 0.0 |
| Bhmt          | 0.0 | 0.0 | 0.0 | 0.0 | 0.0 | 0.0 | 0.0 | 0.0 | 0.0 | 0.0 | 0.0 | 0.0 |
| Bmp7          | 0.0 | 0.0 | 0.0 | 0.0 | 0.0 | 0.0 | 0.0 | 0.0 | 0.0 | 0.0 | 0.1 | 0.0 |
| Boll          | 0.0 | 0.0 | 0.0 | 0.0 | 0.0 | 0.0 | 0.0 | 0.0 | 0.0 | 0.0 | 0.0 | 0.0 |
| Bpifa6        | 0.0 | 0.0 | 0.0 | 0.0 | 0.0 | 0.1 | 0.0 | 0.0 | 0.0 | 0.0 | 0.0 | 0.0 |
| Bpifb1        | 0.0 | 0.0 | 0.0 | 0.0 | 0.0 | 0.0 | 0.0 | 0.0 | 0.0 | 0.0 | 0.0 | 0.0 |
| Bpifb2        | 0.0 | 0.0 | 0.0 | 0.0 | 0.0 | 0.0 | 0.0 | 0.0 | 0.0 | 0.0 | 0.0 | 0.0 |
| Bpifb4        | 0.0 | 0.0 | 0.0 | 0.0 | 0.0 | 0.0 | 0.0 | 0.0 | 0.0 | 0.0 | 0.0 | 0.0 |
| Bpifb5        | 0.0 | 0.0 | 0.0 | 0.1 | 0.0 | 0.0 | 0.0 | 0.0 | 0.0 | 0.0 | 0.0 | 0.0 |
| Bpifb6        | 0.0 | 0.0 | 0.0 | 0.0 | 0.0 | 0.1 | 0.0 | 0.0 | 0.0 | 0.0 | 0.0 | 0.0 |
| Bpifb9a       | 0.0 | 0.0 | 0.0 | 0.0 | 0.0 | 0.0 | 0.0 | 0.0 | 0.0 | 0.0 | 0.0 | 0.0 |
| Bpifb9b       | 0.0 | 0.0 | 0.0 | 0.0 | 0.0 | 0.0 | 0.0 | 0.0 | 0.0 | 0.0 | 0.0 | 0.0 |
| Bpifc         | 0.0 | 0.0 | 0.0 | 0.0 | 0.0 | 0.0 | 0.0 | 0.0 | 0.0 | 0.0 | 0.0 | 0.0 |
| Brs3          | 0.0 | 0.0 | 0.0 | 0.0 | 0.0 | 0.0 | 0.0 | 0.0 | 0.0 | 0.0 | 0.0 | 0.0 |
| Bsx           | 0.0 | 0.1 | 0.0 | 0.0 | 0.0 | 0.0 | 0.0 | 0.0 | 0.0 | 0.0 | 0.0 | 0.0 |
| Btbd17        | 0.0 | 0.0 | 0.0 | 0.0 | 0.0 | 0.0 | 0.0 | 0.0 | 0.0 | 0.0 | 0.0 | 0.0 |
| Btg4          | 0.0 | 0.0 | 0.0 | 0.0 | 0.0 | 0.0 | 0.0 | 0.0 | 0.0 | 0.0 | 0.0 | 0.0 |
| Btn1a1        | 0.0 | 0.0 | 0.0 | 0.0 | 0.0 | 0.0 | 0.0 | 0.0 | 0.0 | 0.0 | 0.0 | 0.0 |
| Btnl1         | 0.0 | 0.0 | 0.0 | 0.0 | 0.0 | 0.0 | 0.0 | 0.0 | 0.0 | 0.0 | 0.0 | 0.0 |
| Btnl10        | 0.0 | 0.0 | 0.0 | 0.0 | 0.0 | 0.0 | 0.0 | 0.0 | 0.0 | 0.0 | 0.0 | 0.0 |
| Btnl5         | 0.0 | 0.0 | 0.0 | 0.0 | 0.0 | 0.0 | 0.0 | 0.0 | 0.0 | 0.0 | 0.0 | 0.0 |
| C030018K13Rik | 0.0 | 0.0 | 0.0 | 0.0 | 0.0 | 0.0 | 0.0 | 0.0 | 0.0 | 0.0 | 0.1 | 0.0 |
| C130030K03Rik | 0.0 | 0.0 | 0.0 | 0.0 | 0.0 | 0.0 | 0.0 | 0.0 | 0.0 | 0.0 | 0.0 | 0.0 |
| C130060K24Rik | 0.0 | 0.0 | 0.0 | 0.0 | 0.0 | 0.0 | 0.0 | 0.0 | 0.0 | 0.0 | 0.0 | 0.0 |
| C130071C03Rik | 0.0 | 0.0 | 0.0 | 0.0 | 0.0 | 0.0 | 0.0 | 0.0 | 0.0 | 0.0 | 0.0 | 0.0 |
| C130080G10Rik | 0.0 | 0.0 | 0.0 | 0.0 | 0.0 | 0.0 | 0.0 | 0.0 | 0.0 | 0.0 | 0.0 | 0.0 |
| C1ql2         | 0.0 | 0.0 | 0.0 | 0.0 | 0.0 | 0.0 | 0.0 | 0.0 | 0.0 | 0.0 | 0.0 | 0.0 |
| C1ql4         | 0.1 | 0.0 | 0.0 | 0.1 | 0.0 | 0.0 | 0.0 | 0.0 | 0.0 | 0.0 | 0.0 | 0.0 |
| C230004F18Rik | 0.0 | 0.0 | 0.0 | 0.0 | 0.0 | 0.0 | 0.0 | 0.0 | 0.0 | 0.0 | 0.0 | 0.0 |

Excluded Genes

|               |     |     |     |     |     |     |     |     |     |     |     |     |
|---------------|-----|-----|-----|-----|-----|-----|-----|-----|-----|-----|-----|-----|
| C230024C17Rik | 0.0 | 0.0 | 0.0 | 0.0 | 0.0 | 0.0 | 0.0 | 0.0 | 0.0 | 0.0 | 0.0 | 0.0 |
| C230079O03Rik | 0.0 | 0.0 | 0.0 | 0.0 | 0.0 | 0.0 | 0.0 | 0.0 | 0.0 | 0.0 | 0.0 | 0.0 |
| C2cd4a        | 0.0 | 0.0 | 0.0 | 0.0 | 0.0 | 0.0 | 0.0 | 0.0 | 0.0 | 0.0 | 0.0 | 0.0 |
| C2cd4d        | 0.0 | 0.0 | 0.0 | 0.0 | 0.0 | 0.0 | 0.0 | 0.0 | 0.0 | 0.0 | 0.0 | 0.0 |
| C330011F03Rik | 0.0 | 0.0 | 0.0 | 0.0 | 0.0 | 0.0 | 0.0 | 0.0 | 0.0 | 0.0 | 0.0 | 0.0 |
| C330022C24Rik | 0.0 | 0.0 | 0.0 | 0.0 | 0.0 | 0.0 | 0.0 | 0.0 | 0.1 | 0.0 | 0.0 | 0.0 |
| C330046G13Rik | 0.0 | 0.0 | 0.0 | 0.0 | 0.0 | 0.0 | 0.0 | 0.0 | 0.0 | 0.0 | 0.0 | 0.0 |
| C4bp-ps1      | 0.0 | 0.1 | 0.1 | 0.1 | 0.1 | 0.0 | 0.0 | 0.0 | 0.0 | 0.0 | 0.0 | 0.0 |
| C6            | 0.0 | 0.0 | 0.0 | 0.0 | 0.0 | 0.0 | 0.0 | 0.0 | 0.0 | 0.1 | 0.0 | 0.0 |
| C630020P19Rik | 0.0 | 0.0 | 0.0 | 0.0 | 0.0 | 0.0 | 0.0 | 0.0 | 0.0 | 0.0 | 0.0 | 0.0 |
| C630028M04Rik | 0.0 | 0.0 | 0.0 | 0.0 | 0.0 | 0.0 | 0.0 | 0.0 | 0.0 | 0.0 | 0.0 | 0.0 |
| C630031E19Rik | 0.0 | 0.0 | 0.0 | 0.0 | 0.0 | 0.0 | 0.0 | 0.0 | 0.0 | 0.0 | 0.0 | 0.0 |
| C86187        | 0.0 | 0.0 | 0.0 | 0.0 | 0.0 | 0.0 | 0.0 | 0.0 | 0.0 | 0.0 | 0.0 | 0.0 |
| C87414        | 0.0 | 0.0 | 0.0 | 0.0 | 0.0 | 0.0 | 0.0 | 0.0 | 0.0 | 0.0 | 0.0 | 0.0 |
| C87977        | 0.0 | 0.0 | 0.0 | 0.0 | 0.0 | 0.0 | 0.0 | 0.0 | 0.0 | 0.0 | 0.0 | 0.0 |
| C8a           | 0.0 | 0.0 | 0.0 | 0.0 | 0.0 | 0.0 | 0.0 | 0.0 | 0.0 | 0.0 | 0.0 | 0.0 |
| Cabp5         | 0.0 | 0.0 | 0.0 | 0.0 | 0.0 | 0.0 | 0.0 | 0.0 | 0.0 | 0.0 | 0.0 | 0.0 |
| Cacna1f       | 0.0 | 0.0 | 0.0 | 0.0 | 0.0 | 0.0 | 0.0 | 0.0 | 0.0 | 0.0 | 0.0 | 0.0 |
| Cacng1        | 0.0 | 0.1 | 0.0 | 0.0 | 0.0 | 0.0 | 0.0 | 0.0 | 0.0 | 0.0 | 0.1 | 0.0 |
| Cacng2        | 0.0 | 0.0 | 0.0 | 0.0 | 0.0 | 0.0 | 0.0 | 0.0 | 0.0 | 0.0 | 0.0 | 0.0 |
| Cacng3        | 0.0 | 0.0 | 0.0 | 0.0 | 0.0 | 0.0 | 0.0 | 0.0 | 0.0 | 0.0 | 0.0 | 0.0 |
| Cacng4        | 0.0 | 0.0 | 0.0 | 0.0 | 0.0 | 0.0 | 0.0 | 0.0 | 0.0 | 0.0 | 0.0 | 0.0 |
| Cacng5        | 0.0 | 0.0 | 0.0 | 0.0 | 0.0 | 0.0 | 0.0 | 0.0 | 0.0 | 0.0 | 0.0 | 0.0 |
| Cacng6        | 0.0 | 0.0 | 0.0 | 0.0 | 0.0 | 0.0 | 0.0 | 0.0 | 0.0 | 0.0 | 0.0 | 0.0 |
| Calb1         | 0.0 | 0.0 | 0.0 | 0.0 | 0.0 | 0.0 | 0.1 | 0.0 | 0.0 | 0.0 | 0.0 | 0.0 |
| Calb2         | 0.1 | 0.0 | 0.0 | 0.0 | 0.0 | 0.0 | 0.1 | 0.0 | 0.0 | 0.0 | 0.0 | 0.1 |
| Calcr         | 0.0 | 0.0 | 0.0 | 0.0 | 0.0 | 0.0 | 0.0 | 0.0 | 0.0 | 0.0 | 0.0 | 0.0 |
| Calm3         | 0.0 | 0.0 | 0.0 | 0.0 | 0.0 | 0.0 | 0.0 | 0.0 | 0.0 | 0.0 | 0.0 | 0.0 |
| Camkv         | 0.0 | 0.0 | 0.0 | 0.0 | 0.0 | 0.0 | 0.0 | 0.0 | 0.0 | 0.0 | 0.0 | 0.0 |
| Capn13        | 0.0 | 0.0 | 0.0 | 0.0 | 0.0 | 0.0 | 0.0 | 0.0 | 0.0 | 0.0 | 0.0 | 0.0 |
| Caps2         | 0.0 | 0.0 | 0.0 | 0.0 | 0.0 | 0.0 | 0.0 | 0.0 | 0.0 | 0.0 | 0.0 | 0.0 |
| Capsl         | 0.0 | 0.0 | 0.0 | 0.0 | 0.1 | 0.2 | 0.0 | 0.0 | 0.0 | 0.0 | 0.0 | 0.0 |
| Capza3        | 0.0 | 0.0 | 0.0 | 0.0 | 0.0 | 0.0 | 0.0 | 0.0 | 0.0 | 0.0 | 0.0 | 0.0 |
| Car1          | 0.0 | 0.0 | 0.0 | 0.0 | 0.0 | 0.0 | 0.0 | 0.0 | 0.0 | 0.0 | 0.0 | 0.0 |
| Car2          | 0.0 | 0.0 | 0.0 | 0.0 | 0.0 | 0.0 | 0.0 | 0.0 | 0.0 | 0.0 | 0.0 | 0.0 |
| Car3          | 0.0 | 0.0 | 0.0 | 0.1 | 0.0 | 0.0 | 0.0 | 0.0 | 0.0 | 0.0 | 0.0 | 0.1 |
| Casr          | 0.0 | 0.0 | 0.0 | 0.0 | 0.0 | 0.0 | 0.0 | 0.0 | 0.0 | 0.0 | 0.0 | 0.0 |
| Catsper1      | 0.0 | 0.0 | 0.0 | 0.0 | 0.0 | 0.0 | 0.0 | 0.0 | 0.0 | 0.0 | 0.0 | 0.0 |
| Catsper4      | 0.0 | 0.0 | 0.0 | 0.0 | 0.0 | 0.0 | 0.0 | 0.0 | 0.0 | 0.0 | 0.0 | 0.0 |
| Catsperb      | 0.0 | 0.0 | 0.0 | 0.0 | 0.0 | 0.0 | 0.0 | 0.0 | 0.0 | 0.0 | 0.0 | 0.0 |
| Cbln4         | 0.0 | 0.0 | 0.0 | 0.0 | 0.0 | 0.0 | 0.0 | 0.0 | 0.0 | 0.0 | 0.0 | 0.0 |
| Ccdc108       | 0.0 | 0.0 | 0.0 | 0.0 | 0.0 | 0.0 | 0.0 | 0.0 | 0.0 | 0.0 | 0.0 | 0.0 |
| Ccdc113       | 0.0 | 0.0 | 0.0 | 0.0 | 0.0 | 0.0 | 0.0 | 0.0 | 0.0 | 0.0 | 0.0 | 0.0 |
| Ccdc153       | 0.0 | 0.0 | 0.1 | 0.0 | 0.0 | 0.0 | 0.0 | 0.0 | 0.0 | 0.0 | 0.0 | 0.0 |
| Ccdc172       | 0.0 | 0.0 | 0.0 | 0.1 | 0.0 | 0.0 | 0.0 | 0.0 | 0.0 | 0.0 | 0.0 | 0.0 |
| Ccdc177       | 0.0 | 0.0 | 0.0 | 0.0 | 0.0 | 0.0 | 0.0 | 0.0 | 0.0 | 0.0 | 0.0 | 0.0 |
| Ccdc178       | 0.0 | 0.0 | 0.0 | 0.0 | 0.0 | 0.0 | 0.0 | 0.0 | 0.0 | 0.0 | 0.0 | 0.0 |
| Ccdc33        | 0.0 | 0.0 | 0.0 | 0.0 | 0.0 | 0.0 | 0.0 | 0.0 | 0.0 | 0.0 | 0.0 | 0.0 |
| Ccdc42b       | 0.0 | 0.0 | 0.0 | 0.0 | 0.0 | 0.0 | 0.0 | 0.1 | 0.0 | 0.0 | 0.0 | 0.0 |
| Ccdc54        | 0.0 | 0.1 | 0.0 | 0.0 | 0.0 | 0.0 | 0.0 | 0.0 | 0.0 | 0.0 | 0.0 | 0.0 |
| Ccdc60        | 0.1 | 0.0 | 0.0 | 0.0 | 0.0 | 0.0 | 0.0 | 0.0 | 0.0 | 0.0 | 0.0 | 0.1 |
| Ccdc67        | 0.0 | 0.0 | 0.0 | 0.0 | 0.0 | 0.0 | 0.0 | 0.0 | 0.0 | 0.0 | 0.0 | 0.0 |
| Ccdc7         | 0.0 | 0.0 | 0.0 | 0.0 | 0.0 | 0.0 | 0.0 | 0.0 | 0.0 | 0.0 | 0.0 | 0.0 |
| Ccer1         | 0.0 | 0.0 | 0.0 | 0.1 | 0.0 | 0.0 | 0.0 | 0.0 | 0.0 | 0.0 | 0.0 | 0.0 |
| Cckar         | 0.0 | 0.0 | 0.0 | 0.0 | 0.0 | 0.0 | 0.0 | 0.0 | 0.0 | 0.0 | 0.0 | 0.0 |
| Cckbr         | 0.0 | 0.0 | 0.0 | 0.0 | 0.0 | 0.0 | 0.0 | 0.0 | 0.0 | 0.0 | 0.0 | 0.0 |
| Ccl22         | 0.0 | 0.0 | 0.0 | 0.0 | 0.0 | 0.0 | 0.0 | 0.0 | 0.0 | 0.0 | 0.0 | 0.0 |

Excluded Genes

|          |     |     |     |     |     |     |     |     |     |     |     |     |
|----------|-----|-----|-----|-----|-----|-----|-----|-----|-----|-----|-----|-----|
| Ccl24    | 0.0 | 0.0 | 0.0 | 0.0 | 0.0 | 0.0 | 0.1 | 0.0 | 0.0 | 0.0 | 0.0 | 0.0 |
| Ccnb1ip1 | 0.0 | 0.1 | 0.0 | 0.0 | 0.0 | 0.0 | 0.0 | 0.0 | 0.0 | 0.0 | 0.0 | 0.0 |
| Ccr11l   | 0.0 | 0.0 | 0.0 | 0.0 | 0.0 | 0.0 | 0.0 | 0.0 | 0.0 | 0.0 | 0.0 | 0.0 |
| Ccr2     | 0.0 | 0.0 | 0.0 | 0.0 | 0.1 | 0.0 | 0.0 | 0.0 | 0.0 | 0.0 | 0.0 | 0.0 |
| Ccr6     | 0.0 | 0.0 | 0.0 | 0.0 | 0.0 | 0.0 | 0.0 | 0.0 | 0.0 | 0.0 | 0.0 | 0.0 |
| Cd163    | 0.0 | 0.0 | 0.0 | 0.0 | 0.0 | 0.0 | 0.0 | 0.0 | 0.0 | 0.0 | 0.0 | 0.0 |
| Cd19     | 0.0 | 0.0 | 0.0 | 0.0 | 0.0 | 0.0 | 0.0 | 0.0 | 0.0 | 0.0 | 0.0 | 0.0 |
| Cd2      | 0.0 | 0.0 | 0.0 | 0.0 | 0.1 | 0.0 | 0.0 | 0.0 | 0.0 | 0.0 | 0.0 | 0.0 |
| Cd209a   | 0.0 | 0.0 | 0.0 | 0.0 | 0.0 | 0.0 | 0.0 | 0.0 | 0.0 | 0.0 | 0.0 | 0.0 |
| Cd209d   | 0.0 | 0.0 | 0.0 | 0.0 | 0.0 | 0.0 | 0.0 | 0.0 | 0.0 | 0.0 | 0.0 | 0.1 |
| Cd209f   | 0.0 | 0.0 | 0.0 | 0.0 | 0.0 | 0.0 | 0.0 | 0.0 | 0.0 | 0.0 | 0.0 | 0.1 |
| Cd226    | 0.0 | 0.0 | 0.0 | 0.0 | 0.0 | 0.0 | 0.0 | 0.0 | 0.0 | 0.0 | 0.0 | 0.0 |
| Cd3d     | 0.0 | 0.0 | 0.0 | 0.0 | 0.0 | 0.0 | 0.0 | 0.0 | 0.0 | 0.0 | 0.0 | 0.0 |
| Cd3g     | 0.0 | 0.0 | 0.0 | 0.0 | 0.0 | 0.0 | 0.0 | 0.0 | 0.0 | 0.0 | 0.0 | 0.0 |
| Cd40lg   | 0.0 | 0.0 | 0.0 | 0.0 | 0.0 | 0.0 | 0.0 | 0.0 | 0.0 | 0.0 | 0.0 | 0.0 |
| Cd5l     | 0.0 | 0.0 | 0.0 | 0.5 | 0.1 | 0.0 | 0.0 | 0.0 | 0.0 | 0.0 | 0.0 | 0.0 |
| Cd6      | 0.0 | 0.0 | 0.0 | 0.0 | 0.0 | 0.0 | 0.0 | 0.0 | 0.0 | 0.0 | 0.1 | 0.0 |
| Cd7      | 0.0 | 0.0 | 0.0 | 0.0 | 0.0 | 0.0 | 0.0 | 0.0 | 0.0 | 0.0 | 0.0 | 0.0 |
| Cd79b    | 0.0 | 0.0 | 0.0 | 0.0 | 0.0 | 0.0 | 0.0 | 0.0 | 0.0 | 0.0 | 0.0 | 0.0 |
| Cdcp2    | 0.0 | 0.0 | 0.0 | 0.0 | 0.0 | 0.0 | 0.0 | 0.0 | 0.0 | 0.0 | 0.0 | 0.0 |
| Cdh16    | 0.0 | 0.0 | 0.0 | 0.0 | 0.0 | 0.0 | 0.0 | 0.0 | 0.0 | 0.0 | 0.0 | 0.0 |
| Cdh18    | 0.0 | 0.0 | 0.0 | 0.0 | 0.0 | 0.0 | 0.0 | 0.0 | 0.0 | 0.0 | 0.0 | 0.0 |
| Cdh20    | 0.0 | 0.0 | 0.0 | 0.0 | 0.0 | 0.0 | 0.0 | 0.0 | 0.0 | 0.0 | 0.0 | 0.0 |
| Cdh22    | 0.0 | 0.0 | 0.0 | 0.0 | 0.0 | 0.0 | 0.0 | 0.0 | 0.0 | 0.0 | 0.0 | 0.0 |
| Cdh8     | 0.0 | 0.0 | 0.0 | 0.0 | 0.0 | 0.0 | 0.0 | 0.0 | 0.0 | 0.0 | 0.0 | 0.0 |
| Cdh9     | 0.0 | 0.0 | 0.0 | 0.0 | 0.0 | 0.0 | 0.0 | 0.0 | 0.0 | 0.0 | 0.0 | 0.0 |
| Cdhr2    | 0.0 | 0.0 | 0.0 | 0.0 | 0.0 | 0.0 | 0.0 | 0.0 | 0.0 | 0.0 | 0.0 | 0.0 |
| Cdhr5    | 0.0 | 0.0 | 0.0 | 0.0 | 0.0 | 0.0 | 0.0 | 0.0 | 0.0 | 0.0 | 0.0 | 0.0 |
| Cdk5r2   | 0.0 | 0.0 | 0.0 | 0.0 | 0.0 | 0.0 | 0.0 | 0.0 | 0.0 | 0.0 | 0.0 | 0.0 |
| Cdr1     | 0.0 | 0.0 | 0.0 | 0.0 | 0.0 | 0.0 | 0.0 | 0.0 | 0.0 | 0.0 | 0.0 | 0.0 |
| Cdx1     | 0.0 | 0.0 | 0.0 | 0.0 | 0.0 | 0.0 | 0.0 | 0.0 | 0.0 | 0.0 | 0.0 | 0.0 |
| Ceacam10 | 0.0 | 0.0 | 0.0 | 0.0 | 0.0 | 0.0 | 0.0 | 0.0 | 0.0 | 0.0 | 0.0 | 0.0 |
| Ceacam13 | 0.0 | 0.0 | 0.0 | 0.0 | 0.0 | 0.0 | 0.0 | 0.0 | 0.0 | 0.0 | 0.0 | 0.0 |
| Ceacam15 | 0.0 | 0.0 | 0.0 | 0.0 | 0.0 | 0.0 | 0.0 | 0.0 | 0.0 | 0.0 | 0.0 | 0.0 |
| Ceacam18 | 0.0 | 0.0 | 0.0 | 0.1 | 0.0 | 0.0 | 0.0 | 0.0 | 0.0 | 0.0 | 0.0 | 0.0 |
| Ceacam9  | 0.0 | 0.0 | 0.0 | 0.0 | 0.0 | 0.0 | 0.0 | 0.0 | 0.0 | 0.0 | 0.0 | 0.0 |
| Cebpe    | 0.0 | 0.0 | 0.0 | 0.0 | 0.0 | 0.0 | 0.0 | 0.0 | 0.0 | 0.0 | 0.0 | 0.0 |
| Cel      | 0.0 | 0.0 | 0.0 | 0.0 | 0.0 | 0.0 | 0.0 | 0.0 | 0.0 | 0.0 | 0.0 | 0.0 |
| Cer1     | 0.0 | 0.0 | 0.0 | 0.0 | 0.0 | 0.0 | 0.0 | 0.0 | 0.0 | 0.0 | 0.0 | 0.0 |
| Ces1b    | 0.0 | 0.0 | 0.0 | 0.0 | 0.0 | 0.0 | 0.0 | 0.0 | 0.0 | 0.0 | 0.0 | 0.0 |
| Ces1c    | 0.0 | 0.0 | 0.0 | 0.0 | 0.0 | 0.0 | 0.0 | 0.0 | 0.0 | 0.0 | 0.0 | 0.0 |
| Ces2h    | 0.0 | 0.0 | 0.0 | 0.0 | 0.0 | 0.0 | 0.0 | 0.0 | 0.0 | 0.0 | 0.0 | 0.0 |
| Ces3b    | 0.0 | 0.0 | 0.0 | 0.0 | 0.0 | 0.0 | 0.0 | 0.0 | 0.0 | 0.0 | 0.0 | 0.0 |
| Ces4a    | 0.0 | 0.0 | 0.0 | 0.0 | 0.0 | 0.0 | 0.0 | 0.0 | 0.0 | 0.0 | 0.0 | 0.0 |
| Ces5a    | 0.0 | 0.0 | 0.0 | 0.1 | 0.0 | 0.0 | 0.0 | 0.0 | 0.0 | 0.0 | 0.0 | 0.0 |
| Cfd      | 0.0 | 0.0 | 0.0 | 0.0 | 0.0 | 0.0 | 0.0 | 0.0 | 0.1 | 0.0 | 0.0 | 0.0 |
| Cga      | 0.1 | 0.0 | 0.0 | 0.0 | 0.0 | 0.0 | 0.0 | 0.0 | 0.0 | 0.0 | 0.0 | 0.0 |
| Chat     | 0.0 | 0.0 | 0.0 | 0.0 | 0.0 | 0.0 | 0.0 | 0.0 | 0.0 | 0.0 | 0.0 | 0.0 |
| Chi3l3   | 0.0 | 0.0 | 0.1 | 0.2 | 0.0 | 0.0 | 0.1 | 0.0 | 0.0 | 0.0 | 0.0 | 0.0 |
| Chi3l4   | 0.0 | 0.0 | 0.0 | 0.0 | 0.0 | 0.0 | 0.0 | 0.0 | 0.0 | 0.0 | 0.0 | 0.0 |
| Chia     | 0.0 | 0.0 | 0.0 | 0.0 | 0.0 | 0.5 | 0.0 | 0.0 | 0.0 | 0.0 | 0.0 | 0.0 |
| Chp2     | 0.0 | 0.0 | 0.0 | 0.0 | 0.0 | 0.0 | 0.0 | 0.0 | 0.0 | 0.0 | 0.0 | 0.0 |
| Chrdl2   | 0.0 | 0.1 | 0.0 | 0.0 | 0.0 | 0.0 | 0.0 | 0.0 | 0.0 | 0.0 | 0.0 | 0.0 |
| Chrm5    | 0.0 | 0.0 | 0.0 | 0.0 | 0.0 | 0.0 | 0.0 | 0.0 | 0.0 | 0.0 | 0.0 | 0.0 |
| Chrna3   | 0.0 | 0.0 | 0.0 | 0.0 | 0.0 | 0.0 | 0.0 | 0.0 | 0.0 | 0.0 | 0.0 | 0.0 |
| Chrna6   | 0.0 | 0.0 | 0.0 | 0.0 | 0.0 | 0.0 | 0.0 | 0.0 | 0.0 | 0.0 | 0.0 | 0.0 |
| Chrb3    | 0.0 | 0.0 | 0.0 | 0.0 | 0.0 | 0.0 | 0.0 | 0.0 | 0.0 | 0.0 | 0.0 | 0.0 |

Excluded Genes

|          |     |     |     |     |     |     |     |     |     |     |     |     |
|----------|-----|-----|-----|-----|-----|-----|-----|-----|-----|-----|-----|-----|
| Chrn4    | 0.0 | 0.0 | 0.0 | 0.0 | 0.0 | 0.0 | 0.0 | 0.0 | 0.0 | 0.0 | 0.0 | 0.0 |
| Chrnd    | 0.0 | 0.0 | 0.0 | 0.0 | 0.0 | 0.0 | 0.0 | 0.0 | 0.0 | 0.0 | 0.0 | 0.0 |
| Chrne    | 0.0 | 0.0 | 0.0 | 0.1 | 0.0 | 0.0 | 0.0 | 0.0 | 0.0 | 0.0 | 0.0 | 0.0 |
| Chrng    | 0.0 | 0.0 | 0.0 | 0.0 | 0.0 | 0.0 | 0.0 | 0.0 | 0.0 | 0.0 | 0.0 | 0.0 |
| Chst9    | 0.0 | 0.0 | 0.0 | 0.0 | 0.0 | 0.0 | 0.0 | 0.0 | 0.0 | 0.0 | 0.0 | 0.0 |
| Cib4     | 0.0 | 0.0 | 0.0 | 0.0 | 0.0 | 0.0 | 0.0 | 0.0 | 0.0 | 0.0 | 0.0 | 0.0 |
| Cidea    | 0.0 | 0.0 | 0.0 | 0.0 | 0.0 | 0.0 | 0.0 | 0.0 | 0.0 | 0.0 | 0.0 | 0.0 |
| Cidec    | 0.0 | 0.0 | 0.0 | 0.0 | 0.0 | 0.0 | 0.0 | 0.0 | 0.0 | 0.0 | 0.0 | 0.0 |
| Cited1   | 0.0 | 0.0 | 0.0 | 0.0 | 0.0 | 0.1 | 0.0 | 0.0 | 0.0 | 0.0 | 0.0 | 0.2 |
| Ckm      | 0.0 | 0.1 | 0.0 | 0.0 | 0.0 | 0.0 | 0.0 | 0.0 | 0.0 | 0.0 | 0.0 | 0.0 |
| Clca3    | 0.0 | 0.0 | 0.0 | 0.0 | 0.0 | 0.0 | 0.0 | 0.0 | 0.0 | 0.0 | 0.0 | 0.0 |
| Clcnka   | 0.0 | 0.0 | 0.0 | 0.0 | 0.0 | 0.1 | 0.0 | 0.0 | 0.0 | 0.0 | 0.0 | 0.0 |
| Cldn13   | 0.0 | 0.0 | 0.0 | 0.0 | 0.0 | 0.0 | 0.0 | 0.0 | 0.0 | 0.0 | 0.0 | 0.0 |
| Cldn14   | 0.0 | 0.0 | 0.0 | 0.0 | 0.0 | 0.0 | 0.0 | 0.0 | 0.0 | 0.0 | 0.0 | 0.0 |
| Cldn18   | 0.0 | 0.0 | 0.0 | 0.0 | 0.0 | 0.0 | 0.0 | 0.0 | 0.0 | 0.0 | 0.0 | 0.0 |
| Cldn2    | 0.0 | 0.0 | 0.0 | 0.0 | 0.0 | 0.0 | 0.0 | 0.0 | 0.0 | 0.0 | 0.0 | 0.0 |
| Cldn26   | 0.0 | 0.0 | 0.0 | 0.0 | 0.0 | 0.0 | 0.0 | 0.0 | 0.0 | 0.0 | 0.0 | 0.0 |
| Cldn4    | 0.0 | 0.0 | 0.0 | 0.1 | 0.0 | 0.0 | 0.0 | 0.0 | 0.0 | 0.0 | 0.0 | 0.0 |
| Cldn6    | 0.0 | 0.0 | 0.0 | 0.0 | 0.0 | 0.0 | 0.0 | 0.0 | 0.0 | 0.0 | 0.0 | 0.0 |
| Cldn9    | 0.0 | 0.0 | 0.0 | 0.0 | 0.0 | 0.0 | 0.0 | 0.0 | 0.0 | 0.1 | 0.0 | 0.0 |
| Clec12b  | 0.0 | 0.0 | 0.0 | 0.0 | 0.0 | 0.0 | 0.0 | 0.0 | 0.0 | 0.0 | 0.0 | 0.0 |
| Clec1b   | 0.0 | 0.0 | 0.0 | 0.0 | 0.0 | 0.0 | 0.0 | 0.0 | 0.0 | 0.0 | 0.0 | 0.1 |
| Clec3a   | 0.0 | 0.0 | 0.0 | 0.0 | 0.0 | 0.0 | 0.0 | 0.0 | 0.0 | 0.0 | 0.0 | 0.0 |
| Clec4b1  | 0.1 | 0.0 | 0.0 | 0.0 | 0.2 | 0.0 | 0.0 | 0.0 | 0.0 | 0.0 | 0.0 | 0.0 |
| Clrn1    | 0.0 | 0.0 | 0.0 | 0.0 | 0.0 | 0.0 | 0.0 | 0.0 | 0.0 | 0.0 | 0.0 | 0.0 |
| Clrn3    | 0.0 | 0.0 | 0.0 | 0.0 | 0.0 | 0.0 | 0.0 | 0.0 | 0.0 | 0.0 | 0.0 | 0.0 |
| Clvs2    | 0.0 | 0.0 | 0.0 | 0.0 | 0.0 | 0.0 | 0.0 | 0.0 | 0.0 | 0.0 | 0.0 | 0.0 |
| Cma2     | 0.0 | 0.0 | 0.0 | 0.0 | 0.0 | 0.0 | 0.0 | 0.0 | 0.1 | 0.0 | 0.0 | 0.0 |
| Cml5     | 0.0 | 0.0 | 0.0 | 0.0 | 0.0 | 0.1 | 0.0 | 0.0 | 0.0 | 0.0 | 0.0 | 0.0 |
| Cmtm1    | 0.0 | 0.0 | 0.0 | 0.1 | 0.0 | 0.1 | 0.0 | 0.0 | 0.0 | 0.0 | 0.0 | 0.0 |
| Cmtm2a   | 0.0 | 0.0 | 0.0 | 0.0 | 0.1 | 0.0 | 0.0 | 0.0 | 0.0 | 0.0 | 0.0 | 0.0 |
| Cnfn     | 0.0 | 0.0 | 0.0 | 0.0 | 0.0 | 0.0 | 0.1 | 0.0 | 0.0 | 0.0 | 0.0 | 0.0 |
| Cnga1    | 0.0 | 0.0 | 0.0 | 0.0 | 0.0 | 0.0 | 0.0 | 0.0 | 0.0 | 0.0 | 0.0 | 0.0 |
| Cnga4    | 0.0 | 0.0 | 0.1 | 0.0 | 0.0 | 0.0 | 0.0 | 0.0 | 0.0 | 0.0 | 0.0 | 0.0 |
| Cnih3    | 0.0 | 0.0 | 0.0 | 0.0 | 0.0 | 0.0 | 0.0 | 0.0 | 0.0 | 0.0 | 0.0 | 0.0 |
| Cnksr2   | 0.0 | 0.0 | 0.0 | 0.0 | 0.0 | 0.0 | 0.0 | 0.0 | 0.0 | 0.0 | 0.0 | 0.0 |
| Cnpy1    | 0.0 | 0.0 | 0.0 | 0.0 | 0.0 | 0.0 | 0.0 | 0.0 | 0.0 | 0.0 | 0.0 | 0.0 |
| Cntr3    | 0.0 | 0.0 | 0.0 | 0.0 | 0.0 | 0.0 | 0.0 | 0.0 | 0.0 | 0.0 | 0.0 | 0.0 |
| Cntr6    | 0.0 | 0.0 | 0.0 | 0.0 | 0.0 | 0.0 | 0.0 | 0.0 | 0.0 | 0.0 | 0.0 | 0.0 |
| Cntnap4  | 0.0 | 0.0 | 0.0 | 0.0 | 0.0 | 0.0 | 0.0 | 0.0 | 0.0 | 0.0 | 0.0 | 0.0 |
| Cntnap5c | 0.0 | 0.0 | 0.0 | 0.0 | 0.0 | 0.0 | 0.0 | 0.0 | 0.0 | 0.0 | 0.0 | 0.0 |
| Col9a1   | 0.0 | 0.0 | 0.0 | 0.0 | 0.0 | 0.0 | 0.0 | 0.0 | 0.0 | 0.0 | 0.0 | 0.0 |
| Cort     | 0.0 | 0.0 | 0.0 | 0.0 | 0.0 | 0.0 | 0.0 | 0.0 | 0.0 | 0.0 | 0.0 | 0.0 |
| Cox7b2   | 0.1 | 0.0 | 0.0 | 0.0 | 0.0 | 0.1 | 0.0 | 0.2 | 0.0 | 0.0 | 0.0 | 0.0 |
| Cox8b    | 0.6 | 0.0 | 0.1 | 0.0 | 0.0 | 0.0 | 0.0 | 0.2 | 0.0 | 0.0 | 0.0 | 0.2 |
| Cpa5     | 0.0 | 0.0 | 0.0 | 0.0 | 0.0 | 0.0 | 0.0 | 0.0 | 0.0 | 0.0 | 0.0 | 0.0 |
| Cplx4    | 0.0 | 0.0 | 0.0 | 0.0 | 0.0 | 0.0 | 0.0 | 0.0 | 0.0 | 0.0 | 0.0 | 0.1 |
| Cpn1     | 0.0 | 0.0 | 0.0 | 0.0 | 0.0 | 0.0 | 0.0 | 0.0 | 0.0 | 0.0 | 0.0 | 0.0 |
| Cpn2     | 0.0 | 0.0 | 0.0 | 0.0 | 0.0 | 0.0 | 0.0 | 0.0 | 0.0 | 0.0 | 0.0 | 0.0 |
| Cpvl     | 0.0 | 0.0 | 0.0 | 0.0 | 0.0 | 0.0 | 0.0 | 0.0 | 0.0 | 0.0 | 0.0 | 0.1 |
| Crb1     | 0.0 | 0.0 | 0.0 | 0.0 | 0.0 | 0.0 | 0.0 | 0.0 | 0.0 | 0.0 | 0.0 | 0.0 |
| Crb3     | 0.0 | 0.0 | 0.0 | 0.0 | 0.0 | 0.0 | 0.0 | 0.0 | 0.0 | 0.0 | 0.0 | 0.0 |
| Crhr2    | 0.0 | 0.0 | 0.0 | 0.0 | 0.0 | 0.0 | 0.0 | 0.0 | 0.0 | 0.0 | 0.0 | 0.0 |
| Crip3    | 0.0 | 0.0 | 0.0 | 0.0 | 0.0 | 0.0 | 0.2 | 0.0 | 0.0 | 0.0 | 0.0 | 0.0 |
| Crisp1   | 0.0 | 0.0 | 0.0 | 0.0 | 0.0 | 0.0 | 0.0 | 0.0 | 0.0 | 0.0 | 0.0 | 0.0 |
| Crisp4   | 0.0 | 0.0 | 0.0 | 0.0 | 0.0 | 0.0 | 0.0 | 0.0 | 0.0 | 0.0 | 0.1 | 0.0 |
| Crnn     | 0.0 | 0.0 | 0.0 | 0.0 | 0.0 | 0.0 | 0.0 | 0.0 | 0.0 | 0.0 | 0.0 | 0.0 |

Excluded Genes

|            |     |     |     |     |     |     |     |     |     |     |     |     |
|------------|-----|-----|-----|-----|-----|-----|-----|-----|-----|-----|-----|-----|
| Crp        | 0.0 | 0.0 | 0.0 | 0.0 | 0.0 | 0.0 | 0.0 | 0.0 | 0.0 | 0.0 | 0.0 | 0.0 |
| Crtam      | 0.0 | 0.0 | 0.0 | 0.0 | 0.0 | 0.0 | 0.0 | 0.0 | 0.0 | 0.0 | 0.0 | 0.0 |
| Crxos1     | 0.1 | 0.0 | 0.0 | 0.0 | 0.1 | 0.0 | 0.0 | 0.0 | 0.0 | 0.0 | 0.0 | 0.0 |
| Cryaa      | 0.0 | 0.0 | 0.0 | 0.1 | 0.0 | 0.0 | 0.0 | 0.0 | 0.0 | 0.0 | 0.0 | 0.0 |
| Crybb2     | 0.0 | 0.0 | 0.0 | 0.0 | 0.0 | 0.0 | 0.0 | 0.0 | 0.0 | 0.0 | 0.0 | 0.0 |
| Crygf      | 0.0 | 0.0 | 0.0 | 0.0 | 0.0 | 0.0 | 0.0 | 0.0 | 0.0 | 0.0 | 0.0 | 0.0 |
| Csf3       | 0.0 | 0.0 | 0.0 | 0.0 | 0.0 | 0.0 | 0.0 | 0.0 | 0.0 | 0.0 | 0.0 | 0.0 |
| Csn1s1     | 0.0 | 0.0 | 0.0 | 0.0 | 0.0 | 0.0 | 0.0 | 0.0 | 0.0 | 0.0 | 0.0 | 0.0 |
| Csn1s2a    | 0.0 | 0.0 | 0.0 | 0.0 | 0.0 | 0.0 | 0.0 | 0.0 | 0.0 | 0.0 | 0.0 | 0.0 |
| Csn1s2b    | 0.0 | 0.0 | 0.0 | 0.0 | 0.0 | 0.0 | 0.0 | 0.0 | 0.0 | 0.0 | 0.0 | 0.0 |
| Csn3       | 0.0 | 0.0 | 0.0 | 0.0 | 0.0 | 0.0 | 0.0 | 0.0 | 0.0 | 0.0 | 0.0 | 0.0 |
| Csnka2ip   | 0.0 | 0.0 | 0.0 | 0.0 | 0.0 | 0.0 | 0.0 | 0.0 | 0.0 | 0.0 | 0.0 | 0.0 |
| Csrnp3     | 0.0 | 0.0 | 0.0 | 0.0 | 0.0 | 0.0 | 0.0 | 0.0 | 0.0 | 0.0 | 0.0 | 0.0 |
| Csrp3      | 0.0 | 0.0 | 0.0 | 0.0 | 0.0 | 0.0 | 0.0 | 0.0 | 0.0 | 0.0 | 0.0 | 0.0 |
| Cst13      | 0.0 | 0.0 | 0.0 | 0.0 | 0.0 | 0.0 | 0.0 | 0.0 | 0.0 | 0.0 | 0.0 | 0.0 |
| Cst8       | 0.0 | 0.0 | 0.1 | 0.0 | 0.0 | 0.0 | 0.0 | 0.0 | 0.0 | 0.0 | 0.0 | 0.0 |
| Csta       | 0.0 | 0.0 | 0.0 | 0.0 | 0.0 | 0.0 | 0.0 | 0.0 | 0.0 | 0.0 | 0.0 | 0.0 |
| Ctag2      | 0.0 | 0.0 | 0.0 | 0.0 | 0.0 | 0.0 | 0.0 | 0.0 | 0.0 | 0.0 | 0.0 | 0.0 |
| Ctf2       | 0.0 | 0.0 | 0.1 | 0.0 | 0.0 | 0.0 | 0.0 | 0.0 | 0.0 | 0.0 | 0.0 | 0.0 |
| Ctrc       | 0.0 | 0.0 | 0.0 | 0.0 | 0.0 | 0.0 | 0.0 | 0.0 | 0.0 | 0.0 | 0.0 | 0.0 |
| Cts7       | 0.0 | 0.0 | 0.0 | 0.0 | 0.0 | 0.0 | 0.0 | 0.0 | 0.0 | 0.0 | 0.1 | 0.0 |
| Cts8       | 0.0 | 0.0 | 0.0 | 0.0 | 0.0 | 0.0 | 0.0 | 0.0 | 0.0 | 0.0 | 0.0 | 0.0 |
| Cts8-ps    | 0.0 | 0.0 | 0.0 | 0.0 | 0.0 | 0.0 | 0.0 | 0.0 | 0.0 | 0.0 | 0.0 | 0.0 |
| Ctse       | 0.0 | 0.0 | 0.0 | 0.0 | 0.0 | 0.0 | 0.0 | 0.0 | 0.0 | 0.0 | 0.0 | 0.0 |
| Ctsq       | 0.0 | 0.0 | 0.0 | 0.0 | 0.0 | 0.0 | 0.0 | 0.0 | 0.0 | 0.0 | 0.0 | 0.0 |
| Ctxn2      | 0.0 | 0.0 | 0.0 | 0.0 | 0.0 | 0.0 | 0.0 | 0.1 | 0.0 | 0.0 | 0.0 | 0.0 |
| Ctxn3      | 0.0 | 0.0 | 0.0 | 0.0 | 0.0 | 0.0 | 0.1 | 0.0 | 0.0 | 0.0 | 0.0 | 0.0 |
| Cuzd1      | 0.0 | 0.0 | 0.0 | 0.0 | 0.0 | 0.0 | 0.0 | 0.0 | 0.0 | 0.0 | 0.0 | 0.0 |
| Cwh43      | 0.0 | 0.0 | 0.0 | 0.0 | 0.0 | 0.0 | 0.0 | 0.0 | 0.0 | 0.0 | 0.0 | 0.0 |
| Cxcl13     | 0.0 | 0.0 | 0.0 | 0.0 | 0.0 | 0.0 | 0.0 | 0.1 | 0.0 | 0.1 | 0.0 | 0.0 |
| Cxcl17     | 0.1 | 0.0 | 0.3 | 0.0 | 0.0 | 0.0 | 0.1 | 0.1 | 0.0 | 0.1 | 0.0 | 0.2 |
| Cylc2      | 0.0 | 0.0 | 0.0 | 0.0 | 0.0 | 0.0 | 0.0 | 0.0 | 0.0 | 0.0 | 0.0 | 0.0 |
| Cym        | 0.0 | 0.0 | 0.0 | 0.0 | 0.0 | 0.0 | 0.0 | 0.0 | 0.0 | 0.0 | 0.0 | 0.0 |
| Cyp11a1    | 0.0 | 0.0 | 0.0 | 0.0 | 0.0 | 0.0 | 0.0 | 0.0 | 0.0 | 0.0 | 0.0 | 0.0 |
| Cyp11b2    | 0.0 | 0.0 | 0.0 | 0.0 | 0.0 | 0.0 | 0.0 | 0.0 | 0.0 | 0.0 | 0.0 | 0.0 |
| Cyp19a1    | 0.0 | 0.0 | 0.0 | 0.0 | 0.0 | 0.0 | 0.0 | 0.0 | 0.0 | 0.0 | 0.0 | 0.0 |
| Cyp1a2     | 0.0 | 0.0 | 0.0 | 0.0 | 0.0 | 0.0 | 0.0 | 0.0 | 0.0 | 0.0 | 0.0 | 0.0 |
| Cyp21a1    | 0.0 | 0.0 | 0.0 | 0.1 | 0.0 | 0.0 | 0.0 | 0.0 | 0.0 | 0.0 | 0.0 | 0.0 |
| Cyp24a1    | 0.0 | 0.0 | 0.0 | 0.0 | 0.0 | 0.0 | 0.0 | 0.0 | 0.0 | 0.0 | 0.0 | 0.0 |
| Cyp26a1    | 0.0 | 0.0 | 0.0 | 0.0 | 0.0 | 0.0 | 0.0 | 0.1 | 0.0 | 0.0 | 0.0 | 0.0 |
| Cyp2a4     | 0.0 | 0.0 | 0.0 | 0.0 | 0.0 | 0.0 | 0.0 | 0.0 | 0.0 | 0.0 | 0.0 | 0.0 |
| Cyp2b13    | 0.0 | 0.0 | 0.0 | 0.0 | 0.0 | 0.0 | 0.0 | 0.0 | 0.0 | 0.0 | 0.0 | 0.0 |
| Cyp2b9     | 0.0 | 0.0 | 0.0 | 0.0 | 0.0 | 0.0 | 0.0 | 0.0 | 0.0 | 0.0 | 0.0 | 0.0 |
| Cyp2c29    | 0.0 | 0.0 | 0.0 | 0.0 | 0.0 | 0.0 | 0.0 | 0.0 | 0.0 | 0.0 | 0.0 | 0.0 |
| Cyp2c38    | 0.0 | 0.0 | 0.0 | 0.0 | 0.0 | 0.0 | 0.0 | 0.0 | 0.0 | 0.0 | 0.0 | 0.0 |
| Cyp2c39    | 0.0 | 0.0 | 0.0 | 0.0 | 0.0 | 0.0 | 0.0 | 0.0 | 0.0 | 0.0 | 0.0 | 0.0 |
| Cyp2c40    | 0.0 | 0.0 | 0.0 | 0.0 | 0.0 | 0.0 | 0.0 | 0.0 | 0.0 | 0.0 | 0.0 | 0.0 |
| Cyp2c50    | 0.0 | 0.0 | 0.0 | 0.0 | 0.0 | 0.0 | 0.0 | 0.0 | 0.0 | 0.0 | 0.0 | 0.0 |
| Cyp2c53-ps | 0.0 | 0.0 | 0.0 | 0.0 | 0.0 | 0.0 | 0.0 | 0.0 | 0.0 | 0.0 | 0.0 | 0.0 |
| Cyp2c65    | 0.0 | 0.0 | 0.0 | 0.0 | 0.0 | 0.0 | 0.0 | 0.0 | 0.0 | 0.0 | 0.0 | 0.0 |
| Cyp2c66    | 0.0 | 0.0 | 0.0 | 0.0 | 0.0 | 0.0 | 0.0 | 0.0 | 0.0 | 0.0 | 0.0 | 0.0 |
| Cyp2c67    | 0.0 | 0.0 | 0.0 | 0.0 | 0.0 | 0.0 | 0.0 | 0.0 | 0.0 | 0.0 | 0.0 | 0.0 |
| Cyp2c68    | 0.0 | 0.0 | 0.0 | 0.0 | 0.0 | 0.0 | 0.0 | 0.0 | 0.0 | 0.0 | 0.0 | 0.0 |
| Cyp2c69    | 0.0 | 0.0 | 0.0 | 0.0 | 0.0 | 0.0 | 0.0 | 0.0 | 0.0 | 0.0 | 0.0 | 0.0 |
| Cyp2d10    | 0.0 | 0.0 | 0.0 | 0.0 | 0.0 | 0.0 | 0.0 | 0.0 | 0.0 | 0.0 | 0.0 | 0.0 |
| Cyp2d11    | 0.0 | 0.0 | 0.0 | 0.0 | 0.0 | 0.0 | 0.0 | 0.0 | 0.0 | 0.0 | 0.0 | 0.0 |
| Cyp2d13    | 0.0 | 0.0 | 0.0 | 0.0 | 0.0 | 0.0 | 0.0 | 0.0 | 0.0 | 0.0 | 0.0 | 0.0 |

Excluded Genes

|               |     |     |     |     |     |     |     |     |     |     |     |     |
|---------------|-----|-----|-----|-----|-----|-----|-----|-----|-----|-----|-----|-----|
| Cyp2d34       | 0.0 | 0.0 | 0.0 | 0.0 | 0.0 | 0.0 | 0.0 | 0.0 | 0.0 | 0.0 | 0.0 | 0.0 |
| Cyp2d37-ps    | 0.0 | 0.0 | 0.0 | 0.0 | 0.0 | 0.0 | 0.0 | 0.0 | 0.0 | 0.0 | 0.0 | 0.0 |
| Cyp2d40       | 0.0 | 0.0 | 0.0 | 0.0 | 0.0 | 0.0 | 0.0 | 0.0 | 0.0 | 0.0 | 0.0 | 0.0 |
| Cyp2e1        | 0.0 | 0.0 | 0.0 | 0.0 | 0.0 | 0.0 | 0.0 | 0.0 | 0.0 | 0.0 | 0.0 | 0.0 |
| Cyp2f2        | 0.0 | 0.0 | 0.0 | 0.0 | 0.0 | 0.0 | 0.0 | 0.0 | 0.0 | 0.0 | 0.0 | 0.0 |
| Cyp2j11       | 0.0 | 0.0 | 0.0 | 0.0 | 0.0 | 0.0 | 0.0 | 0.0 | 0.0 | 0.0 | 0.0 | 0.0 |
| Cyp2j12       | 0.0 | 0.0 | 0.0 | 0.0 | 0.0 | 0.0 | 0.0 | 0.0 | 0.0 | 0.0 | 0.0 | 0.0 |
| Cyp2j5        | 0.0 | 0.0 | 0.0 | 0.0 | 0.0 | 0.0 | 0.0 | 0.0 | 0.0 | 0.0 | 0.0 | 0.0 |
| Cyp2j8        | 0.0 | 0.0 | 0.0 | 0.1 | 0.0 | 0.0 | 0.0 | 0.0 | 0.0 | 0.0 | 0.0 | 0.0 |
| Cyp3a16       | 0.0 | 0.0 | 0.0 | 0.0 | 0.0 | 0.0 | 0.0 | 0.0 | 0.0 | 0.0 | 0.0 | 0.0 |
| Cyp3a41a      | 0.0 | 0.0 | 0.0 | 0.0 | 0.0 | 0.0 | 0.0 | 0.0 | 0.0 | 0.0 | 0.0 | 0.0 |
| Cyp3a44       | 0.0 | 0.0 | 0.0 | 0.0 | 0.0 | 0.0 | 0.0 | 0.0 | 0.0 | 0.0 | 0.0 | 0.0 |
| Cyp3a57       | 0.0 | 0.0 | 0.0 | 0.0 | 0.0 | 0.0 | 0.0 | 0.0 | 0.0 | 0.0 | 0.0 | 0.0 |
| Cyp3a59       | 0.0 | 0.0 | 0.0 | 0.1 | 0.0 | 0.0 | 0.0 | 0.0 | 0.0 | 0.0 | 0.0 | 0.0 |
| Cyp4a10       | 0.0 | 0.0 | 0.0 | 0.0 | 0.0 | 0.0 | 0.0 | 0.0 | 0.0 | 0.0 | 0.0 | 0.0 |
| Cyp4a12a      | 0.1 | 0.0 | 0.0 | 0.1 | 0.0 | 0.0 | 0.0 | 0.0 | 0.0 | 0.0 | 0.0 | 0.0 |
| Cyp4a14       | 0.0 | 0.0 | 0.0 | 0.0 | 0.0 | 0.0 | 0.0 | 0.0 | 0.0 | 0.0 | 0.0 | 0.0 |
| Cyp4a30b-ps   | 0.0 | 0.0 | 0.0 | 0.0 | 0.0 | 0.0 | 0.0 | 0.0 | 0.0 | 0.0 | 0.0 | 0.0 |
| Cyp4a31       | 0.0 | 0.0 | 0.0 | 0.0 | 0.0 | 0.0 | 0.0 | 0.0 | 0.0 | 0.0 | 0.0 | 0.0 |
| Cyp4a32       | 0.0 | 0.0 | 0.0 | 0.0 | 0.0 | 0.0 | 0.0 | 0.0 | 0.0 | 0.0 | 0.0 | 0.0 |
| Cyp4f39       | 0.0 | 0.0 | 0.0 | 0.0 | 0.0 | 0.0 | 0.0 | 0.0 | 0.0 | 0.0 | 0.0 | 0.0 |
| Cyp4f40       | 0.0 | 0.0 | 0.0 | 0.0 | 0.0 | 0.0 | 0.0 | 0.0 | 0.0 | 0.0 | 0.0 | 0.0 |
| Cyp8b1        | 0.0 | 0.0 | 0.0 | 0.0 | 0.0 | 0.0 | 0.0 | 0.0 | 0.0 | 0.0 | 0.0 | 0.0 |
| Cyp11         | 0.0 | 0.0 | 0.0 | 0.0 | 0.0 | 0.0 | 0.0 | 0.0 | 0.0 | 0.0 | 0.0 | 0.0 |
| Cyp12         | 0.0 | 0.0 | 0.1 | 0.0 | 0.0 | 0.0 | 0.0 | 0.0 | 0.0 | 0.1 | 0.0 | 0.0 |
| Cyp13         | 0.0 | 0.0 | 0.0 | 0.0 | 0.0 | 0.0 | 0.0 | 0.0 | 0.0 | 0.0 | 0.0 | 0.0 |
| Cyp17         | 0.0 | 0.0 | 0.0 | 0.0 | 0.0 | 0.0 | 0.0 | 0.0 | 0.0 | 0.0 | 0.0 | 0.0 |
| Cyp18         | 0.0 | 0.0 | 0.0 | 0.0 | 0.0 | 0.0 | 0.0 | 0.0 | 0.0 | 0.0 | 0.0 | 0.0 |
| Cysltr2       | 0.0 | 0.0 | 0.0 | 0.1 | 0.0 | 0.0 | 0.0 | 0.0 | 0.0 | 0.0 | 0.0 | 0.0 |
| Cytl1         | 0.0 | 0.0 | 0.0 | 0.0 | 0.0 | 0.0 | 0.0 | 0.0 | 0.0 | 0.0 | 0.0 | 0.0 |
| Cyrr1         | 0.0 | 0.1 | 0.0 | 0.0 | 0.0 | 0.0 | 0.0 | 0.0 | 0.0 | 0.0 | 0.0 | 0.0 |
| D030045P18Rik | 0.0 | 0.0 | 0.0 | 0.0 | 0.0 | 0.0 | 0.0 | 0.0 | 0.0 | 0.0 | 0.0 | 0.0 |
| D130058E03    | 0.0 | 0.0 | 0.0 | 0.0 | 0.0 | 0.0 | 0.0 | 0.0 | 0.0 | 0.0 | 0.0 | 0.0 |
| D430019H16Rik | 0.0 | 0.0 | 0.0 | 0.0 | 0.0 | 0.0 | 0.0 | 0.0 | 0.0 | 0.0 | 0.0 | 0.0 |
| D5Ert577e     | 0.0 | 0.0 | 0.0 | 0.0 | 0.0 | 0.0 | 0.0 | 0.0 | 0.0 | 0.0 | 0.0 | 0.0 |
| D630013N20Rik | 0.0 | 0.0 | 0.0 | 0.0 | 0.0 | 0.0 | 0.0 | 0.0 | 0.0 | 0.0 | 0.0 | 0.0 |
| D6Ert474e     | 0.0 | 0.0 | 0.0 | 0.0 | 0.0 | 0.0 | 0.0 | 0.0 | 0.0 | 0.0 | 0.0 | 0.0 |
| D7Ert143e     | 0.0 | 0.0 | 0.0 | 0.0 | 0.0 | 0.0 | 0.0 | 0.0 | 0.0 | 0.0 | 0.0 | 0.0 |
| D830013O20Rik | 0.0 | 0.0 | 0.0 | 0.0 | 0.0 | 0.0 | 0.0 | 0.0 | 0.0 | 0.0 | 0.0 | 0.0 |
| D930007P13Rik | 0.0 | 0.0 | 0.0 | 0.0 | 0.0 | 0.0 | 0.0 | 0.0 | 0.0 | 0.0 | 0.0 | 0.0 |
| D930020B18Rik | 0.0 | 0.0 | 0.0 | 0.0 | 0.0 | 0.0 | 0.0 | 0.0 | 0.0 | 0.0 | 0.0 | 0.0 |
| D930032P07Rik | 0.0 | 0.0 | 0.1 | 0.0 | 0.0 | 0.0 | 0.0 | 0.0 | 0.0 | 0.0 | 0.0 | 0.1 |
| Dao           | 0.0 | 0.0 | 0.0 | 0.0 | 0.0 | 0.0 | 0.0 | 0.0 | 0.0 | 0.0 | 0.0 | 0.0 |
| Darc          | 0.0 | 0.0 | 0.0 | 0.0 | 0.0 | 0.0 | 0.1 | 0.0 | 0.0 | 0.0 | 0.0 | 0.0 |
| Dbpht2        | 0.0 | 0.0 | 0.0 | 0.0 | 0.0 | 0.0 | 0.0 | 0.0 | 0.0 | 0.0 | 0.0 | 0.0 |
| Dbx2          | 0.0 | 0.0 | 0.0 | 0.0 | 0.0 | 0.0 | 0.0 | 0.0 | 0.0 | 0.0 | 0.0 | 0.0 |
| Dcstamp       | 0.0 | 0.0 | 0.0 | 0.0 | 0.3 | 0.0 | 0.0 | 0.0 | 0.0 | 0.0 | 0.0 | 0.0 |
| Dcx           | 0.0 | 0.0 | 0.0 | 0.0 | 0.0 | 0.0 | 0.0 | 0.0 | 0.0 | 0.0 | 0.0 | 0.0 |
| Defb1         | 0.0 | 0.0 | 0.0 | 0.0 | 0.0 | 0.0 | 0.0 | 0.0 | 0.0 | 0.0 | 0.0 | 0.0 |
| Defb18        | 0.0 | 0.0 | 0.0 | 0.0 | 0.0 | 0.0 | 0.0 | 0.0 | 0.0 | 0.0 | 0.0 | 0.0 |
| Defb19        | 0.0 | 0.0 | 0.0 | 0.0 | 0.0 | 0.0 | 0.0 | 0.0 | 0.0 | 0.0 | 0.1 | 0.0 |
| Defb20        | 0.0 | 0.0 | 0.0 | 0.0 | 0.0 | 0.0 | 0.0 | 0.0 | 0.0 | 0.0 | 0.0 | 0.0 |
| Defb26        | 0.0 | 0.0 | 0.0 | 0.0 | 0.0 | 0.0 | 0.0 | 0.0 | 0.0 | 0.0 | 0.0 | 0.2 |
| Defb28        | 0.0 | 0.0 | 0.2 | 0.0 | 0.0 | 0.0 | 0.0 | 0.0 | 0.0 | 0.0 | 0.0 | 0.0 |
| Defb30        | 0.0 | 0.0 | 0.0 | 0.0 | 0.0 | 0.0 | 0.0 | 0.0 | 0.0 | 0.0 | 0.0 | 0.0 |
| Defb42        | 0.1 | 0.0 | 0.1 | 0.0 | 0.0 | 0.0 | 0.0 | 0.0 | 0.0 | 0.0 | 0.0 | 0.0 |
| Defb48        | 0.0 | 0.0 | 0.0 | 0.0 | 0.0 | 0.0 | 0.0 | 0.0 | 0.0 | 0.1 | 0.0 | 0.0 |

Excluded Genes

|               |     |     |      |     |     |       |     |     |     |       |     |      |
|---------------|-----|-----|------|-----|-----|-------|-----|-----|-----|-------|-----|------|
| Defb7         | 0.2 | 0.0 | 0.0  | 0.0 | 0.0 | 0.0   | 0.0 | 0.0 | 0.0 | 0.0   | 0.0 | 0.0  |
| Dgat2l6       | 0.0 | 0.0 | 0.0  | 0.0 | 0.0 | 0.0   | 0.0 | 0.0 | 0.0 | 0.0   | 0.0 | 0.0  |
| Dgkb          | 0.0 | 0.0 | 0.0  | 0.0 | 0.0 | 0.0   | 0.0 | 0.0 | 0.0 | 0.0   | 0.0 | 0.0  |
| Dgkk          | 0.0 | 0.0 | 0.0  | 0.0 | 0.0 | 0.0   | 0.0 | 0.0 | 0.0 | 0.0   | 0.0 | 0.0  |
| Dhrs2         | 0.0 | 0.0 | 0.0  | 0.0 | 0.0 | 0.0   | 0.0 | 0.0 | 0.0 | 0.0   | 0.0 | 0.0  |
| Dio1          | 0.0 | 0.0 | 0.0  | 0.0 | 0.0 | 0.0   | 0.0 | 0.0 | 0.0 | 0.0   | 0.0 | 0.0  |
| Dkk1          | 0.0 | 0.0 | 0.0  | 0.0 | 0.0 | 0.0   | 0.0 | 0.0 | 0.0 | 0.0   | 0.0 | 0.0  |
| Dleu7         | 0.0 | 0.0 | 0.0  | 0.0 | 0.0 | 0.0   | 0.0 | 0.0 | 0.0 | 0.0   | 0.0 | 0.0  |
| Dll3          | 0.0 | 0.0 | 0.0  | 0.0 | 0.0 | 0.0   | 0.0 | 0.0 | 0.0 | 0.0   | 0.0 | 0.0  |
| Dlx1          | 0.0 | 0.0 | 0.0  | 0.0 | 0.0 | 0.0   | 0.1 | 0.0 | 0.0 | 0.0   | 0.0 | 0.0  |
| Dlx1as        | 0.0 | 0.0 | 0.0  | 0.0 | 0.0 | 0.0   | 0.0 | 0.0 | 0.0 | 0.0   | 0.0 | 0.0  |
| Dlx3          | 0.0 | 0.0 | 0.0  | 0.0 | 0.0 | 0.0   | 0.0 | 0.0 | 0.0 | 0.0   | 0.0 | 0.0  |
| Dlx6          | 0.0 | 0.0 | 0.0  | 0.0 | 0.0 | 0.0   | 0.0 | 0.0 | 0.0 | 0.0   | 0.0 | 0.0  |
| Dmbt1         | 0.0 | 0.0 | 0.0  | 0.0 | 0.0 | 0.0   | 0.0 | 0.0 | 0.0 | 0.0   | 0.0 | 0.0  |
| Dmbx1         | 0.0 | 0.0 | 0.0  | 0.0 | 0.0 | 0.0   | 0.0 | 0.0 | 0.0 | 0.0   | 0.0 | 0.0  |
| Dmgdh         | 0.1 | 0.0 | 0.0  | 0.0 | 0.0 | 0.1   | 0.0 | 0.0 | 0.0 | 0.0   | 0.0 | 0.0  |
| Dmrt1         | 0.0 | 0.0 | 0.0  | 0.0 | 0.0 | 0.0   | 0.0 | 0.0 | 0.0 | 0.0   | 0.0 | 0.0  |
| Dmrta1        | 0.1 | 0.0 | 0.0  | 0.0 | 0.0 | 0.0   | 0.0 | 0.0 | 0.0 | 0.0   | 0.0 | 0.0  |
| Dmrtb1        | 0.1 | 0.0 | 0.0  | 0.0 | 0.0 | 0.0   | 0.0 | 0.0 | 0.0 | 0.0   | 0.0 | 0.0  |
| Dmrta1b       | 0.0 | 0.0 | 0.0  | 0.0 | 0.0 | 0.0   | 0.0 | 0.0 | 0.0 | 0.0   | 0.0 | 0.0  |
| Dmrta2        | 0.0 | 0.0 | 0.2  | 0.0 | 0.0 | 0.0   | 0.0 | 0.0 | 0.0 | 0.0   | 0.1 | 0.0  |
| Dnajc22       | 0.0 | 0.1 | 0.0  | 0.0 | 0.0 | 0.0   | 0.0 | 0.0 | 0.0 | 0.0   | 0.0 | 0.0  |
| Dnase1l3      | 0.0 | 0.0 | 0.0  | 0.0 | 0.0 | 0.0   | 0.0 | 0.0 | 0.0 | 0.0   | 0.0 | 0.0  |
| Doxl2         | 0.0 | 0.0 | 0.0  | 0.0 | 0.0 | 0.0   | 0.0 | 0.0 | 0.0 | 0.0   | 0.0 | 0.0  |
| Dpep3         | 0.0 | 0.0 | 0.0  | 0.0 | 0.0 | 0.0   | 0.0 | 0.0 | 0.0 | 0.0   | 0.0 | 0.0  |
| Dpp6          | 0.1 | 0.0 | 0.0  | 0.0 | 0.0 | 0.0   | 0.0 | 0.0 | 0.0 | 0.0   | 0.0 | 0.0  |
| Dppa1         | 0.0 | 0.0 | 0.0  | 0.0 | 0.0 | 0.0   | 0.0 | 0.0 | 0.0 | 0.0   | 0.0 | 0.0  |
| Dppa3         | 0.0 | 0.0 | 0.0  | 0.0 | 0.0 | 0.0   | 0.0 | 0.0 | 0.0 | 0.1   | 0.0 | 0.1  |
| Dppa4         | 0.0 | 0.0 | 0.0  | 0.0 | 0.0 | 0.1   | 0.0 | 0.0 | 0.0 | 0.1   | 0.0 | 0.0  |
| Dppa5a        | 0.1 | 0.0 | 0.0  | 0.0 | 0.1 | 0.0   | 0.0 | 0.1 | 0.0 | 0.1   | 0.0 | 0.0  |
| Dpys          | 0.0 | 0.0 | 0.0  | 0.1 | 0.1 | 0.0   | 0.0 | 0.0 | 0.0 | 0.1   | 0.0 | 0.0  |
| DQ267102      | 0.0 | 0.0 | 60.2 | 0.0 | 0.0 | 108.6 | 0.0 | 0.0 | 0.0 | 310.7 | 0.0 | 81.5 |
| Drd2          | 0.0 | 0.0 | 0.0  | 0.0 | 0.0 | 0.0   | 0.0 | 0.0 | 0.0 | 0.0   | 0.0 | 0.0  |
| Drd5          | 0.0 | 0.0 | 0.0  | 0.0 | 0.0 | 0.0   | 0.0 | 0.0 | 0.0 | 0.0   | 0.0 | 0.0  |
| Dsc1          | 0.0 | 0.0 | 0.0  | 0.0 | 0.0 | 0.0   | 0.0 | 0.0 | 0.0 | 0.0   | 0.0 | 0.0  |
| Dsg1a         | 0.0 | 0.0 | 0.0  | 0.0 | 0.0 | 0.0   | 0.0 | 0.0 | 0.0 | 0.0   | 0.0 | 0.0  |
| Dsg1b         | 0.0 | 0.0 | 0.0  | 0.1 | 0.0 | 0.0   | 0.0 | 0.0 | 0.0 | 0.0   | 0.0 | 0.0  |
| Dsg1c         | 0.0 | 0.0 | 0.0  | 0.0 | 0.0 | 0.0   | 0.0 | 0.0 | 0.0 | 0.0   | 0.0 | 0.0  |
| Dsg3          | 0.0 | 0.0 | 0.0  | 0.0 | 0.0 | 0.0   | 0.0 | 0.0 | 0.0 | 0.0   | 0.0 | 0.0  |
| Dspp          | 0.0 | 0.0 | 0.0  | 0.0 | 0.0 | 0.0   | 0.0 | 0.0 | 0.0 | 0.0   | 0.0 | 0.0  |
| Dusp26        | 0.0 | 0.0 | 0.0  | 0.0 | 0.0 | 0.0   | 0.0 | 0.0 | 0.0 | 0.0   | 0.0 | 0.0  |
| Dux           | 0.0 | 0.0 | 0.0  | 0.0 | 0.0 | 0.0   | 0.0 | 0.0 | 0.0 | 0.0   | 0.0 | 0.0  |
| DXBay18       | 0.0 | 0.0 | 0.0  | 0.0 | 0.0 | 0.0   | 0.0 | 0.0 | 0.0 | 0.0   | 0.0 | 0.0  |
| Dydc1         | 0.1 | 0.0 | 0.0  | 0.1 | 0.0 | 0.0   | 0.0 | 0.0 | 0.0 | 0.0   | 0.0 | 0.0  |
| E030013I19Rik | 0.0 | 0.0 | 0.0  | 0.0 | 0.0 | 0.0   | 0.0 | 0.0 | 0.0 | 0.0   | 0.0 | 0.0  |
| E030025P04Rik | 0.0 | 0.0 | 0.0  | 0.0 | 0.0 | 0.0   | 0.0 | 0.0 | 0.0 | 0.0   | 0.0 | 0.0  |
| E030044B06Rik | 0.0 | 0.1 | 0.0  | 0.0 | 0.0 | 0.0   | 0.0 | 0.0 | 0.0 | 0.0   | 0.0 | 0.0  |
| E130006D01Rik | 0.2 | 0.0 | 0.1  | 0.0 | 0.1 | 0.0   | 0.0 | 0.0 | 0.0 | 0.0   | 0.0 | 0.2  |
| E130008D07Rik | 0.0 | 0.0 | 0.0  | 0.0 | 0.0 | 0.0   | 0.0 | 0.0 | 0.0 | 0.0   | 0.0 | 0.0  |
| E130215H24Rik | 0.0 | 0.0 | 0.0  | 0.2 | 0.1 | 0.0   | 0.0 | 0.0 | 0.0 | 0.0   | 0.0 | 0.0  |
| E130309F12Rik | 0.0 | 0.0 | 0.0  | 0.0 | 0.0 | 0.0   | 0.0 | 0.0 | 0.0 | 0.0   | 0.0 | 0.0  |
| E230008N13Rik | 0.0 | 0.0 | 0.0  | 0.0 | 0.0 | 0.0   | 0.0 | 0.0 | 0.0 | 0.0   | 0.0 | 0.0  |
| E230019M04Rik | 0.0 | 0.0 | 0.0  | 0.0 | 0.0 | 0.0   | 0.0 | 0.0 | 0.0 | 0.0   | 0.0 | 0.0  |
| E230029C05Rik | 0.1 | 0.0 | 0.0  | 0.0 | 0.0 | 0.0   | 0.0 | 0.0 | 0.0 | 0.0   | 0.0 | 0.0  |
| E330014E10Rik | 0.0 | 0.0 | 0.0  | 0.0 | 0.0 | 0.0   | 0.0 | 0.0 | 0.0 | 0.0   | 0.0 | 0.0  |
| E330021D16Rik | 0.0 | 0.0 | 0.0  | 0.0 | 0.0 | 0.0   | 0.0 | 0.0 | 0.0 | 0.0   | 0.0 | 0.0  |
| E430016F16Rik | 0.0 | 0.0 | 0.0  | 0.0 | 0.0 | 0.0   | 0.0 | 0.0 | 0.0 | 0.0   | 0.0 | 0.0  |

Excluded Genes

|               |     |     |     |     |     |     |     |     |     |     |     |     |
|---------------|-----|-----|-----|-----|-----|-----|-----|-----|-----|-----|-----|-----|
| E530001F21Rik | 0.0 | 0.0 | 0.0 | 0.0 | 0.0 | 0.0 | 0.0 | 0.0 | 0.0 | 0.0 | 0.0 | 0.0 |
| Ear10         | 0.0 | 0.0 | 0.0 | 0.0 | 0.0 | 0.0 | 0.0 | 0.0 | 0.0 | 0.1 | 0.0 | 0.0 |
| Ear12         | 0.0 | 0.0 | 0.0 | 0.0 | 0.0 | 0.0 | 0.0 | 0.0 | 0.0 | 0.2 | 0.0 | 0.1 |
| Ear2          | 0.0 | 0.0 | 0.0 | 0.0 | 0.0 | 0.0 | 0.0 | 0.1 | 0.0 | 0.0 | 0.0 | 0.0 |
| Ear5          | 0.0 | 0.0 | 0.0 | 0.0 | 0.1 | 0.0 | 0.0 | 0.0 | 0.0 | 0.0 | 0.0 | 0.0 |
| Eddm3b        | 0.0 | 0.0 | 0.0 | 0.0 | 0.0 | 0.0 | 0.0 | 0.0 | 0.0 | 0.0 | 0.0 | 0.0 |
| Edn2          | 0.0 | 0.0 | 0.0 | 0.0 | 0.0 | 0.0 | 0.0 | 0.0 | 0.0 | 0.2 | 0.1 | 0.0 |
| Edn3          | 0.0 | 0.0 | 0.0 | 0.0 | 0.0 | 0.0 | 0.0 | 0.0 | 0.0 | 0.0 | 0.0 | 0.0 |
| Efcab10       | 0.1 | 0.0 | 0.0 | 0.0 | 0.0 | 0.0 | 0.0 | 0.0 | 0.0 | 0.0 | 0.0 | 0.0 |
| Egfem1        | 0.0 | 0.0 | 0.0 | 0.0 | 0.0 | 0.0 | 0.0 | 0.0 | 0.0 | 0.0 | 0.0 | 0.0 |
| Egr4          | 0.0 | 0.0 | 0.0 | 0.1 | 0.0 | 0.0 | 0.0 | 0.0 | 0.0 | 0.0 | 0.0 | 0.0 |
| Eif4e1b       | 0.0 | 0.0 | 0.0 | 0.0 | 0.0 | 0.0 | 0.0 | 0.0 | 0.0 | 0.0 | 0.0 | 0.0 |
| Elf3          | 0.0 | 0.0 | 0.0 | 0.0 | 0.0 | 0.0 | 0.0 | 0.0 | 0.0 | 0.0 | 0.0 | 0.0 |
| Elovl3        | 0.0 | 0.0 | 0.0 | 0.0 | 0.0 | 0.0 | 0.0 | 0.0 | 0.0 | 0.0 | 0.0 | 0.0 |
| Emx1          | 0.0 | 0.0 | 0.0 | 0.0 | 0.0 | 0.0 | 0.0 | 0.1 | 0.0 | 0.0 | 0.0 | 0.0 |
| Enam          | 0.0 | 0.0 | 0.0 | 0.0 | 0.0 | 0.0 | 0.0 | 0.0 | 0.0 | 0.0 | 0.0 | 0.0 |
| Entpd8        | 0.0 | 0.0 | 0.0 | 0.0 | 0.0 | 0.0 | 0.0 | 0.0 | 0.0 | 0.0 | 0.0 | 0.0 |
| Epcam         | 0.0 | 0.0 | 0.0 | 0.0 | 0.0 | 0.0 | 0.0 | 0.0 | 0.0 | 0.0 | 0.0 | 0.0 |
| Epha10        | 0.0 | 0.0 | 0.0 | 0.0 | 0.0 | 0.0 | 0.0 | 0.0 | 0.0 | 0.0 | 0.0 | 0.0 |
| Epha8         | 0.0 | 0.0 | 0.0 | 0.0 | 0.0 | 0.0 | 0.0 | 0.0 | 0.0 | 0.0 | 0.0 | 0.0 |
| Epo           | 0.0 | 0.1 | 0.0 | 0.0 | 0.0 | 0.0 | 0.0 | 0.0 | 0.0 | 0.0 | 0.0 | 0.0 |
| Epx           | 0.0 | 0.0 | 0.0 | 0.0 | 0.0 | 0.0 | 0.0 | 0.0 | 0.0 | 0.0 | 0.0 | 0.0 |
| Erich2        | 0.0 | 0.0 | 0.0 | 0.1 | 0.0 | 0.1 | 0.0 | 0.0 | 0.0 | 0.0 | 0.0 | 0.0 |
| Ern2          | 0.0 | 0.0 | 0.0 | 0.0 | 0.0 | 0.0 | 0.0 | 0.0 | 0.0 | 0.0 | 0.0 | 0.0 |
| Esrp1         | 0.0 | 0.0 | 0.0 | 0.0 | 0.0 | 0.0 | 0.0 | 0.0 | 0.0 | 0.0 | 0.0 | 0.0 |
| Esx1          | 0.0 | 0.0 | 0.0 | 0.0 | 0.0 | 0.0 | 0.0 | 0.0 | 0.0 | 0.0 | 0.0 | 0.0 |
| Etd           | 0.1 | 0.0 | 0.0 | 0.0 | 0.0 | 0.0 | 0.0 | 0.0 | 0.0 | 0.0 | 0.0 | 0.0 |
| Evx2          | 0.0 | 0.0 | 0.0 | 0.0 | 0.0 | 0.0 | 0.0 | 0.0 | 0.0 | 0.0 | 0.0 | 0.0 |
| F11           | 0.0 | 0.0 | 0.0 | 0.0 | 0.0 | 0.0 | 0.0 | 0.0 | 0.0 | 0.0 | 0.0 | 0.0 |
| F10           | 0.0 | 0.0 | 0.0 | 0.0 | 0.0 | 0.0 | 0.0 | 0.0 | 0.0 | 0.0 | 0.0 | 0.0 |
| F12           | 0.0 | 0.0 | 0.0 | 0.0 | 0.0 | 0.0 | 0.0 | 0.0 | 0.0 | 0.0 | 0.0 | 0.0 |
| F13b          | 0.0 | 0.0 | 0.0 | 0.0 | 0.0 | 0.0 | 0.0 | 0.0 | 0.0 | 0.0 | 0.0 | 0.0 |
| F2            | 0.0 | 0.0 | 0.0 | 0.0 | 0.0 | 0.0 | 0.0 | 0.0 | 0.0 | 0.0 | 0.0 | 0.0 |
| F7            | 0.0 | 0.0 | 0.0 | 0.0 | 0.0 | 0.0 | 0.0 | 0.0 | 0.0 | 0.0 | 0.0 | 0.0 |
| F830045P16Rik | 0.0 | 0.0 | 0.0 | 0.0 | 0.0 | 0.0 | 0.0 | 0.0 | 0.0 | 0.0 | 0.0 | 0.0 |
| Fa2h          | 0.0 | 0.0 | 0.0 | 0.0 | 0.0 | 0.0 | 0.0 | 0.0 | 0.0 | 0.0 | 0.0 | 0.0 |
| Fabp1         | 0.0 | 0.0 | 0.0 | 0.0 | 0.0 | 0.0 | 0.0 | 0.0 | 0.0 | 0.0 | 0.2 | 0.0 |
| Fabp12        | 0.0 | 0.0 | 0.0 | 0.0 | 0.0 | 0.0 | 0.0 | 0.0 | 0.0 | 0.0 | 0.0 | 0.0 |
| Fabp2         | 0.0 | 0.1 | 0.0 | 0.0 | 0.0 | 0.0 | 0.0 | 0.0 | 0.0 | 0.0 | 0.0 | 0.0 |
| Fam124b       | 0.0 | 0.0 | 0.0 | 0.0 | 0.0 | 0.0 | 0.0 | 0.0 | 0.0 | 0.0 | 0.0 | 0.0 |
| Fam135b       | 0.0 | 0.0 | 0.0 | 0.0 | 0.0 | 0.0 | 0.0 | 0.0 | 0.0 | 0.0 | 0.0 | 0.0 |
| Fam151a       | 0.0 | 0.0 | 0.0 | 0.0 | 0.0 | 0.0 | 0.0 | 0.0 | 0.0 | 0.0 | 0.1 | 0.0 |
| Fam154a       | 0.0 | 0.0 | 0.0 | 0.0 | 0.0 | 0.1 | 0.0 | 0.0 | 0.0 | 0.0 | 0.0 | 0.0 |
| Fam159a       | 0.0 | 0.0 | 0.0 | 0.0 | 0.0 | 0.0 | 0.0 | 0.0 | 0.0 | 0.0 | 0.0 | 0.0 |
| Fam170a       | 0.0 | 0.0 | 0.0 | 0.0 | 0.0 | 0.0 | 0.0 | 0.0 | 0.0 | 0.0 | 0.0 | 0.0 |
| Fam170b       | 0.0 | 0.0 | 0.0 | 0.0 | 0.0 | 0.0 | 0.0 | 0.0 | 0.0 | 0.0 | 0.0 | 0.0 |
| Fam181a       | 0.0 | 0.0 | 0.0 | 0.0 | 0.0 | 0.0 | 0.0 | 0.0 | 0.0 | 0.0 | 0.0 | 0.0 |
| Fam181b       | 0.0 | 0.0 | 0.0 | 0.0 | 0.0 | 0.0 | 0.0 | 0.0 | 0.0 | 0.0 | 0.0 | 0.0 |
| Fam187a       | 0.0 | 0.0 | 0.0 | 0.0 | 0.1 | 0.0 | 0.1 | 0.0 | 0.0 | 0.0 | 0.0 | 0.0 |
| Fam187b       | 0.0 | 0.0 | 0.0 | 0.0 | 0.0 | 0.0 | 0.0 | 0.0 | 0.0 | 0.0 | 0.0 | 0.0 |
| Fam189a1      | 0.0 | 0.0 | 0.0 | 0.0 | 0.0 | 0.0 | 0.0 | 0.0 | 0.0 | 0.0 | 0.0 | 0.0 |
| Fam19a4       | 0.0 | 0.0 | 0.0 | 0.0 | 0.0 | 0.0 | 0.0 | 0.0 | 0.0 | 0.0 | 0.0 | 0.0 |
| Fam216b       | 0.0 | 0.0 | 0.0 | 0.0 | 0.0 | 0.1 | 0.0 | 0.0 | 0.0 | 0.0 | 0.0 | 0.0 |
| Fam229a       | 0.1 | 0.0 | 0.0 | 0.0 | 0.0 | 0.0 | 0.0 | 0.0 | 0.0 | 0.0 | 0.0 | 0.0 |
| Fam24a        | 0.0 | 0.0 | 0.0 | 0.6 | 0.0 | 0.2 | 0.0 | 0.0 | 0.0 | 0.0 | 0.0 | 0.2 |
| Fam3b         | 0.0 | 0.0 | 0.0 | 0.0 | 0.0 | 0.0 | 0.0 | 0.0 | 0.0 | 0.0 | 0.0 | 0.0 |
| Fam46d        | 0.0 | 0.0 | 0.0 | 0.0 | 0.0 | 0.0 | 0.0 | 0.0 | 0.0 | 0.0 | 0.0 | 0.0 |

Excluded Genes



|         |     |     |     |     |     |     |     |     |     |     |     |     |
|---------|-----|-----|-----|-----|-----|-----|-----|-----|-----|-----|-----|-----|
| Fam71a  | 0.0 | 0.0 | 0.0 | 0.0 | 0.0 | 0.0 | 0.0 | 0.0 | 0.0 | 0.1 | 0.0 | 0.0 |
| Fam71e2 | 0.0 | 0.0 | 0.0 | 0.0 | 0.0 | 0.0 | 0.0 | 0.0 | 0.0 | 0.0 | 0.0 | 0.0 |
| Fam83b  | 0.0 | 0.0 | 0.0 | 0.0 | 0.0 | 0.0 | 0.0 | 0.0 | 0.0 | 0.0 | 0.0 | 0.0 |
| Fam92b  | 0.0 | 0.0 | 0.0 | 0.0 | 0.0 | 0.0 | 0.0 | 0.0 | 0.0 | 0.0 | 0.0 | 0.0 |
| Fasl    | 0.0 | 0.0 | 0.0 | 0.0 | 0.0 | 0.0 | 0.0 | 0.0 | 0.0 | 0.0 | 0.0 | 0.0 |
| Fate1   | 0.0 | 0.2 | 0.0 | 0.0 | 0.0 | 0.0 | 0.0 | 0.0 | 0.0 | 0.0 | 0.0 | 0.0 |
| Fbp1    | 0.0 | 0.0 | 0.0 | 0.0 | 0.0 | 0.0 | 0.0 | 0.0 | 0.0 | 0.0 | 0.0 | 0.0 |
| Fbp2    | 0.0 | 0.0 | 0.0 | 0.0 | 0.0 | 0.0 | 0.0 | 0.0 | 0.0 | 0.0 | 0.0 | 0.0 |
| Fbxo39  | 0.1 | 0.0 | 0.0 | 0.0 | 0.1 | 0.0 | 0.0 | 0.0 | 0.0 | 0.0 | 0.0 | 0.1 |
| Fbxw13  | 0.0 | 0.0 | 0.0 | 0.0 | 0.0 | 0.0 | 0.0 | 0.0 | 0.0 | 0.0 | 0.0 | 0.0 |
| Fbxw14  | 0.0 | 0.0 | 0.0 | 0.0 | 0.0 | 0.0 | 0.0 | 0.0 | 0.0 | 0.0 | 0.0 | 0.0 |
| Fbxw20  | 0.0 | 0.0 | 0.0 | 0.0 | 0.0 | 0.0 | 0.0 | 0.0 | 0.0 | 0.0 | 0.0 | 0.0 |
| Fbxw22  | 0.0 | 0.0 | 0.0 | 0.0 | 0.0 | 0.0 | 0.0 | 0.0 | 0.0 | 0.0 | 0.0 | 0.0 |
| Fbxw28  | 0.0 | 0.0 | 0.0 | 0.0 | 0.0 | 0.0 | 0.0 | 0.0 | 0.0 | 0.0 | 0.0 | 0.0 |
| Fcamr   | 0.0 | 0.0 | 0.0 | 0.0 | 0.0 | 0.0 | 0.0 | 0.0 | 0.0 | 0.0 | 0.0 | 0.0 |
| Fcrl5   | 0.0 | 0.0 | 0.0 | 0.0 | 0.1 | 0.0 | 0.0 | 0.0 | 0.0 | 0.0 | 0.0 | 0.0 |
| Fcrl6   | 0.0 | 0.0 | 0.0 | 0.0 | 0.0 | 0.0 | 0.0 | 0.0 | 0.0 | 0.0 | 0.0 | 0.0 |
| Fcrla   | 0.0 | 0.0 | 0.0 | 0.0 | 0.0 | 0.0 | 0.0 | 0.0 | 0.0 | 0.0 | 0.0 | 0.0 |
| Fcrlb   | 0.0 | 0.0 | 0.1 | 0.0 | 0.0 | 0.0 | 0.0 | 0.0 | 0.1 | 0.0 | 0.0 | 0.0 |
| Ffar4   | 0.0 | 0.0 | 0.0 | 0.0 | 0.0 | 0.0 | 0.0 | 0.0 | 0.0 | 0.0 | 0.0 | 0.0 |
| Fga     | 0.0 | 0.0 | 0.0 | 0.0 | 0.0 | 0.0 | 0.0 | 0.0 | 0.0 | 0.0 | 0.0 | 0.0 |
| Fgb     | 0.0 | 0.0 | 0.0 | 0.0 | 0.0 | 0.0 | 0.0 | 0.0 | 0.0 | 0.0 | 0.0 | 0.0 |
| Fgf15   | 0.0 | 0.0 | 0.0 | 0.0 | 0.0 | 0.0 | 0.0 | 0.0 | 0.0 | 0.0 | 0.0 | 0.0 |
| Fgf22   | 0.2 | 0.0 | 0.1 | 0.1 | 0.0 | 0.0 | 0.6 | 0.0 | 0.1 | 0.1 | 0.0 | 0.3 |
| Fgf8    | 0.0 | 0.0 | 0.0 | 0.0 | 0.0 | 0.0 | 0.0 | 0.0 | 0.0 | 0.1 | 0.0 | 0.0 |
| Fgfbp1  | 0.0 | 0.0 | 0.0 | 0.0 | 0.0 | 0.0 | 0.0 | 0.0 | 0.0 | 0.0 | 0.0 | 0.0 |
| Fhl5    | 0.0 | 0.0 | 0.0 | 0.0 | 0.0 | 0.0 | 0.0 | 0.0 | 0.0 | 0.0 | 0.0 | 0.0 |
| Fitm1   | 0.0 | 0.0 | 0.0 | 0.0 | 0.0 | 0.0 | 0.0 | 0.0 | 0.0 | 0.0 | 0.0 | 0.0 |
| Flg2    | 0.0 | 0.0 | 0.0 | 0.0 | 0.0 | 0.0 | 0.0 | 0.0 | 0.0 | 0.0 | 0.0 | 0.0 |
| Fmo6    | 0.0 | 0.0 | 0.0 | 0.0 | 0.0 | 0.0 | 0.0 | 0.0 | 0.0 | 0.0 | 0.0 | 0.0 |
| Fmo9    | 0.0 | 0.0 | 0.0 | 0.0 | 0.0 | 0.0 | 0.0 | 0.0 | 0.0 | 0.0 | 0.0 | 0.0 |
| Fnd3c2  | 0.0 | 0.0 | 0.0 | 0.0 | 0.0 | 0.0 | 0.0 | 0.0 | 0.0 | 0.0 | 0.0 | 0.0 |
| Fndc3c1 | 0.0 | 0.0 | 0.0 | 0.0 | 0.0 | 0.0 | 0.0 | 0.0 | 0.0 | 0.0 | 0.0 | 0.0 |
| Folr4   | 0.0 | 0.0 | 0.0 | 0.0 | 0.0 | 0.0 | 0.0 | 0.0 | 0.0 | 0.0 | 0.0 | 0.0 |
| Foxa1   | 0.0 | 0.0 | 0.0 | 0.0 | 0.0 | 0.0 | 0.0 | 0.0 | 0.0 | 0.0 | 0.0 | 0.0 |
| Foxa3   | 0.0 | 0.0 | 0.0 | 0.0 | 0.0 | 0.0 | 0.0 | 0.0 | 0.0 | 0.0 | 0.0 | 0.0 |
| Foxb1   | 0.0 | 0.0 | 0.0 | 0.0 | 0.0 | 0.0 | 0.0 | 0.0 | 0.0 | 0.0 | 0.0 | 0.0 |
| Foxb2   | 0.0 | 0.0 | 0.0 | 0.0 | 0.0 | 0.0 | 0.0 | 0.0 | 0.0 | 0.0 | 0.0 | 0.0 |
| Foxd3   | 0.0 | 0.0 | 0.0 | 0.0 | 0.0 | 0.0 | 0.0 | 0.0 | 0.0 | 0.0 | 0.0 | 0.0 |
| Foxe3   | 0.0 | 0.0 | 0.0 | 0.0 | 0.0 | 0.0 | 0.0 | 0.1 | 0.0 | 0.0 | 0.0 | 0.1 |
| Foxh1   | 0.0 | 0.0 | 0.0 | 0.0 | 0.0 | 0.0 | 0.0 | 0.0 | 0.0 | 0.1 | 0.0 | 0.0 |
| Foxi1   | 0.0 | 0.0 | 0.0 | 0.0 | 0.0 | 0.0 | 0.0 | 0.0 | 0.0 | 0.0 | 0.0 | 0.0 |
| Foxi2   | 0.0 | 0.0 | 0.0 | 0.0 | 0.0 | 0.0 | 0.0 | 0.0 | 0.0 | 0.0 | 0.0 | 0.0 |
| Foxr1   | 0.0 | 0.0 | 0.0 | 0.1 | 0.0 | 0.0 | 0.0 | 0.0 | 0.0 | 0.0 | 0.0 | 0.0 |
| Foxr2   | 0.0 | 0.0 | 0.0 | 0.0 | 0.0 | 0.0 | 0.0 | 0.0 | 0.0 | 0.0 | 0.0 | 0.0 |
| Fpr3    | 0.0 | 0.0 | 0.0 | 0.0 | 0.0 | 0.0 | 0.0 | 0.0 | 0.0 | 0.0 | 0.0 | 0.0 |
| Fpr-rs3 | 0.0 | 0.0 | 0.0 | 0.0 | 0.0 | 0.0 | 0.0 | 0.0 | 0.0 | 0.0 | 0.0 | 0.0 |
| Frmpd3  | 0.0 | 0.0 | 0.0 | 0.0 | 0.0 | 0.0 | 0.0 | 0.0 | 0.0 | 0.0 | 0.0 | 0.0 |
| Fscn3   | 0.0 | 0.0 | 0.0 | 0.0 | 0.1 | 0.0 | 0.0 | 0.0 | 0.0 | 0.0 | 0.0 | 0.0 |
| Fshb    | 0.0 | 0.0 | 0.0 | 0.0 | 0.0 | 0.0 | 0.0 | 0.0 | 0.0 | 0.0 | 0.0 | 0.0 |
| Fshr    | 0.0 | 0.0 | 0.0 | 0.0 | 0.0 | 0.0 | 0.0 | 0.0 | 0.0 | 0.0 | 0.0 | 0.0 |
| Ftcd    | 0.0 | 0.0 | 0.0 | 0.0 | 0.0 | 0.0 | 0.0 | 0.0 | 0.0 | 0.0 | 0.0 | 0.0 |
| Ftmt    | 0.0 | 0.0 | 0.0 | 0.0 | 0.0 | 0.0 | 0.0 | 0.0 | 0.0 | 0.0 | 0.0 | 0.0 |
| Fut1    | 0.0 | 0.0 | 0.1 | 0.1 | 0.0 | 0.0 | 0.0 | 0.0 | 0.0 | 0.0 | 0.0 | 0.0 |
| Fut2    | 0.0 | 0.0 | 0.0 | 0.0 | 0.0 | 0.0 | 0.0 | 0.1 | 0.0 | 0.0 | 0.0 | 0.0 |
| Fut9    | 0.0 | 0.0 | 0.0 | 0.0 | 0.0 | 0.0 | 0.0 | 0.0 | 0.0 | 0.0 | 0.0 | 0.0 |
| Fxyd4   | 0.0 | 0.0 | 0.1 | 0.7 | 0.0 | 0.0 | 0.1 | 0.3 | 0.0 | 0.0 | 0.0 | 0.2 |

Excluded Genes

|               |     |     |     |     |     |     |     |     |     |     |     |     |
|---------------|-----|-----|-----|-----|-----|-----|-----|-----|-----|-----|-----|-----|
| G630055G22Rik | 0.0 | 0.0 | 0.0 | 0.0 | 0.0 | 0.0 | 0.1 | 0.0 | 0.0 | 0.0 | 0.0 | 0.0 |
| G630093K05Rik | 0.0 | 0.0 | 0.0 | 0.0 | 0.0 | 0.0 | 0.0 | 0.0 | 0.0 | 0.0 | 0.0 | 0.0 |
| G6b           | 0.0 | 0.0 | 0.0 | 0.0 | 0.0 | 0.0 | 0.0 | 0.0 | 0.0 | 0.0 | 0.0 | 0.0 |
| G6pc          | 0.0 | 0.0 | 0.0 | 0.0 | 0.0 | 0.0 | 0.0 | 0.0 | 0.0 | 0.0 | 0.0 | 0.0 |
| Gabra2        | 0.0 | 0.0 | 0.0 | 0.0 | 0.0 | 0.0 | 0.0 | 0.0 | 0.0 | 0.0 | 0.0 | 0.0 |
| Gabra5        | 0.0 | 0.0 | 0.0 | 0.0 | 0.0 | 0.0 | 0.0 | 0.0 | 0.0 | 0.0 | 0.0 | 0.0 |
| Gabrg1        | 0.0 | 0.0 | 0.0 | 0.0 | 0.0 | 0.0 | 0.0 | 0.0 | 0.0 | 0.0 | 0.0 | 0.0 |
| Gabrg2        | 0.0 | 0.0 | 0.0 | 0.0 | 0.0 | 0.0 | 0.0 | 0.0 | 0.0 | 0.0 | 0.0 | 0.0 |
| Gabrg3        | 0.0 | 0.0 | 0.0 | 0.0 | 0.0 | 0.0 | 0.0 | 0.0 | 0.0 | 0.0 | 0.0 | 0.0 |
| Gabrq         | 0.0 | 0.0 | 0.0 | 0.0 | 0.0 | 0.0 | 0.0 | 0.0 | 0.0 | 0.0 | 0.0 | 0.0 |
| Gabrr1        | 0.0 | 0.0 | 0.0 | 0.0 | 0.0 | 0.0 | 0.0 | 0.0 | 0.0 | 0.0 | 0.0 | 0.0 |
| Gabrr3        | 0.0 | 0.0 | 0.0 | 0.0 | 0.0 | 0.0 | 0.0 | 0.0 | 0.0 | 0.0 | 0.0 | 0.0 |
| Gad1          | 0.0 | 0.0 | 0.0 | 0.0 | 0.0 | 0.0 | 0.0 | 0.0 | 0.0 | 0.0 | 0.0 | 0.0 |
| Gad2          | 0.0 | 0.0 | 0.0 | 0.0 | 0.0 | 0.0 | 0.0 | 0.0 | 0.0 | 0.0 | 0.0 | 0.0 |
| Galnt13       | 0.0 | 0.0 | 0.0 | 0.0 | 0.0 | 0.0 | 0.0 | 0.0 | 0.0 | 0.0 | 0.0 | 0.0 |
| Galnt5        | 0.0 | 0.0 | 0.0 | 0.0 | 0.0 | 0.0 | 0.0 | 0.0 | 0.0 | 0.0 | 0.0 | 0.0 |
| Galnt6        | 0.0 | 0.0 | 0.0 | 0.0 | 0.0 | 0.0 | 0.0 | 0.0 | 0.0 | 0.0 | 0.0 | 0.0 |
| Galp          | 0.0 | 0.1 | 0.0 | 0.0 | 0.0 | 0.0 | 0.0 | 0.0 | 0.0 | 0.0 | 0.0 | 0.0 |
| Galr1         | 0.0 | 0.0 | 0.0 | 0.0 | 0.0 | 0.0 | 0.0 | 0.0 | 0.0 | 0.0 | 0.0 | 0.0 |
| Galr3         | 0.0 | 0.0 | 0.0 | 0.0 | 0.0 | 0.0 | 0.0 | 0.0 | 0.0 | 0.0 | 0.0 | 0.0 |
| Gapt          | 0.0 | 0.0 | 0.0 | 0.0 | 0.0 | 0.0 | 0.0 | 0.0 | 0.0 | 0.0 | 0.0 | 0.0 |
| Gas2l2        | 0.0 | 0.0 | 0.0 | 0.0 | 0.0 | 0.0 | 0.0 | 0.0 | 0.0 | 0.0 | 0.0 | 0.0 |
| Gc            | 0.0 | 0.0 | 0.0 | 0.0 | 0.0 | 0.0 | 0.0 | 0.0 | 0.0 | 0.0 | 0.0 | 0.0 |
| Gcm2          | 0.0 | 0.0 | 0.0 | 0.1 | 0.1 | 0.0 | 0.0 | 0.0 | 0.0 | 0.0 | 0.0 | 0.0 |
| Gcnt3         | 0.0 | 0.0 | 0.0 | 0.0 | 0.0 | 0.0 | 0.0 | 0.0 | 0.0 | 0.0 | 0.0 | 0.0 |
| Gcsam         | 0.0 | 0.0 | 0.0 | 0.1 | 0.0 | 0.0 | 0.0 | 0.0 | 0.0 | 0.0 | 0.0 | 0.0 |
| Gfra3         | 0.0 | 0.0 | 0.0 | 0.0 | 0.0 | 0.0 | 0.0 | 0.1 | 0.0 | 0.0 | 0.0 | 0.1 |
| Gfral         | 0.0 | 0.0 | 0.0 | 0.0 | 0.0 | 0.0 | 0.0 | 0.0 | 0.0 | 0.0 | 0.0 | 0.0 |
| Gh            | 0.0 | 0.0 | 0.0 | 0.0 | 0.0 | 0.0 | 0.0 | 0.0 | 0.0 | 0.0 | 0.0 | 0.0 |
| Ghrh          | 0.0 | 0.0 | 0.0 | 0.0 | 0.0 | 0.0 | 0.2 | 0.1 | 0.0 | 0.0 | 0.0 | 0.0 |
| Ghsr          | 0.0 | 0.0 | 0.0 | 0.0 | 0.0 | 0.0 | 0.0 | 0.0 | 0.0 | 0.0 | 0.0 | 0.0 |
| Gip           | 0.1 | 0.0 | 0.0 | 0.1 | 0.0 | 0.0 | 0.0 | 0.0 | 0.0 | 0.0 | 0.0 | 0.0 |
| Gipc3         | 0.0 | 0.0 | 0.0 | 0.0 | 0.0 | 0.0 | 0.0 | 0.0 | 0.0 | 0.0 | 0.1 | 0.0 |
| Gja10         | 0.0 | 0.0 | 0.0 | 0.0 | 0.0 | 0.0 | 0.0 | 0.0 | 0.0 | 0.0 | 0.0 | 0.0 |
| Gjb1          | 0.0 | 0.0 | 0.0 | 0.0 | 0.0 | 0.0 | 0.0 | 0.0 | 0.0 | 0.0 | 0.0 | 0.0 |
| Gjb2          | 0.0 | 0.0 | 0.0 | 0.0 | 0.0 | 0.0 | 0.0 | 0.0 | 0.0 | 0.0 | 0.0 | 0.0 |
| Gjd3          | 0.0 | 0.0 | 0.0 | 0.0 | 0.0 | 0.0 | 0.0 | 0.0 | 0.0 | 0.1 | 0.0 | 0.0 |
| Gjd4          | 0.0 | 0.0 | 0.0 | 0.0 | 0.0 | 0.0 | 0.0 | 0.0 | 0.0 | 0.1 | 0.0 | 0.0 |
| Gje1          | 0.0 | 0.0 | 0.0 | 0.0 | 0.0 | 0.0 | 0.0 | 0.0 | 0.0 | 0.0 | 0.0 | 0.0 |
| Gk2           | 0.0 | 0.0 | 0.0 | 0.0 | 0.0 | 0.0 | 0.0 | 0.0 | 0.0 | 0.0 | 0.0 | 0.0 |
| Gkn3          | 0.0 | 0.0 | 0.0 | 0.0 | 0.0 | 0.0 | 0.0 | 0.0 | 0.0 | 0.0 | 0.0 | 0.0 |
| Glb1l3        | 0.0 | 0.0 | 0.0 | 0.0 | 0.0 | 0.0 | 0.0 | 0.0 | 0.0 | 0.0 | 0.0 | 0.0 |
| Glpr1l1       | 0.0 | 0.0 | 0.0 | 0.0 | 0.0 | 0.0 | 0.0 | 0.0 | 0.0 | 0.0 | 0.0 | 0.0 |
| Glpr1l2       | 0.0 | 0.0 | 0.0 | 0.0 | 0.0 | 0.0 | 0.0 | 0.0 | 0.0 | 0.0 | 0.0 | 0.0 |
| Glr2          | 0.0 | 0.0 | 0.0 | 0.0 | 0.0 | 0.0 | 0.0 | 0.0 | 0.0 | 0.0 | 0.0 | 0.0 |
| Glr4          | 0.0 | 0.0 | 0.0 | 0.0 | 0.0 | 0.0 | 0.0 | 0.0 | 0.0 | 0.0 | 0.0 | 0.0 |
| Glrp1         | 0.0 | 0.0 | 0.0 | 0.0 | 0.0 | 0.0 | 0.1 | 0.0 | 0.0 | 0.0 | 0.0 | 0.0 |
| Glt1d1        | 0.0 | 0.5 | 0.0 | 0.0 | 0.0 | 0.0 | 0.0 | 0.0 | 0.0 | 0.1 | 0.0 | 0.0 |
| Glt6d1        | 0.0 | 0.0 | 0.0 | 0.0 | 0.0 | 0.0 | 0.0 | 0.0 | 0.0 | 0.0 | 0.0 | 0.0 |
| Gm10007       | 0.0 | 0.0 | 0.1 | 0.0 | 0.0 | 0.0 | 0.0 | 0.1 | 0.0 | 0.0 | 0.0 | 0.0 |
| Gm10057       | 0.0 | 0.0 | 0.0 | 0.0 | 0.0 | 0.0 | 0.0 | 0.0 | 0.0 | 0.0 | 0.0 | 0.0 |
| Gm10248       | 0.0 | 0.0 | 0.0 | 0.0 | 0.0 | 0.0 | 0.0 | 0.0 | 0.0 | 0.0 | 0.0 | 0.0 |
| Gm10280       | 0.0 | 0.0 | 0.0 | 0.0 | 0.0 | 0.0 | 0.0 | 0.0 | 0.0 | 0.0 | 0.0 | 0.0 |
| Gm10318       | 0.0 | 0.0 | 0.0 | 0.0 | 0.0 | 0.0 | 0.0 | 0.1 | 0.0 | 0.0 | 0.0 | 0.0 |
| Gm10324       | 0.0 | 0.0 | 0.0 | 0.0 | 0.0 | 0.0 | 0.0 | 0.0 | 0.0 | 0.0 | 0.0 | 0.0 |
| Gm10373       | 0.0 | 0.0 | 0.0 | 0.0 | 0.0 | 0.0 | 0.3 | 0.0 | 0.0 | 0.0 | 0.0 | 0.0 |
| Gm10375       | 0.1 | 0.0 | 0.0 | 0.0 | 0.0 | 0.0 | 0.0 | 0.0 | 0.0 | 0.0 | 0.0 | 0.0 |

Excluded Genes





|         |     |     |     |     |     |     |     |     |     |     |     |     |
|---------|-----|-----|-----|-----|-----|-----|-----|-----|-----|-----|-----|-----|
| Gm16390 | 0.0 | 0.0 | 0.0 | 0.0 | 0.0 | 0.0 | 0.0 | 0.0 | 0.0 | 0.1 | 0.0 | 0.0 |
| Gm16404 | 0.0 | 0.0 | 0.0 | 0.0 | 0.0 | 0.0 | 0.0 | 0.0 | 0.0 | 0.0 | 0.0 | 0.0 |
| Gm16405 | 0.0 | 0.0 | 0.0 | 0.0 | 0.0 | 0.0 | 0.0 | 0.0 | 0.0 | 0.0 | 0.0 | 0.0 |
| Gm16445 | 0.0 | 0.0 | 0.0 | 0.0 | 0.1 | 0.0 | 0.0 | 0.0 | 0.0 | 0.0 | 0.0 | 0.0 |
| Gm1647  | 0.0 | 0.0 | 0.0 | 0.0 | 0.0 | 0.1 | 0.0 | 0.0 | 0.0 | 0.0 | 0.0 | 0.0 |
| Gm16497 | 0.0 | 0.0 | 0.0 | 0.0 | 0.0 | 0.0 | 0.0 | 0.0 | 0.0 | 0.0 | 0.0 | 0.0 |
| Gm1653  | 0.0 | 0.0 | 0.0 | 0.1 | 0.0 | 0.0 | 0.0 | 0.0 | 0.0 | 0.0 | 0.0 | 0.0 |
| Gm16701 | 0.0 | 0.0 | 0.0 | 0.0 | 0.0 | 0.2 | 0.1 | 0.0 | 0.0 | 0.0 | 0.1 | 0.0 |
| Gm16833 | 0.0 | 0.0 | 0.0 | 0.0 | 0.1 | 0.0 | 0.0 | 0.0 | 0.1 | 0.0 | 0.0 | 0.0 |
| Gm16863 | 0.0 | 0.0 | 0.0 | 0.0 | 0.0 | 0.0 | 0.0 | 0.0 | 0.0 | 0.0 | 0.0 | 0.0 |
| Gm1720  | 0.0 | 0.0 | 0.0 | 0.0 | 0.1 | 0.0 | 0.0 | 0.0 | 0.0 | 0.0 | 0.0 | 0.0 |
| Gm17359 | 0.0 | 0.0 | 0.0 | 0.0 | 0.0 | 0.0 | 0.0 | 0.0 | 0.0 | 0.0 | 0.0 | 0.0 |
| Gm17365 | 0.0 | 0.0 | 0.0 | 0.0 | 0.0 | 0.0 | 0.0 | 0.0 | 0.0 | 0.1 | 0.0 | 0.0 |
| Gm17660 | 0.0 | 0.0 | 0.0 | 0.0 | 0.0 | 0.0 | 0.0 | 0.0 | 0.0 | 0.0 | 0.0 | 0.0 |
| Gm17745 | 0.0 | 0.0 | 0.0 | 0.0 | 0.0 | 0.1 | 0.0 | 0.0 | 0.0 | 0.0 | 0.0 | 0.0 |
| Gm17746 | 0.0 | 0.0 | 0.0 | 0.0 | 0.0 | 0.0 | 0.0 | 0.0 | 0.0 | 0.0 | 0.0 | 0.0 |
| Gm17751 | 0.0 | 0.0 | 0.0 | 0.0 | 0.0 | 0.0 | 0.0 | 0.0 | 0.0 | 0.0 | 0.0 | 0.0 |
| Gm18409 | 0.0 | 0.0 | 0.0 | 0.0 | 0.0 | 0.0 | 0.0 | 0.0 | 0.0 | 0.0 | 0.0 | 0.0 |
| Gm19277 | 0.0 | 0.0 | 0.1 | 0.0 | 0.0 | 0.0 | 0.0 | 0.1 | 0.0 | 0.0 | 0.0 | 0.0 |
| Gm19395 | 0.1 | 0.1 | 0.0 | 0.0 | 0.0 | 0.0 | 0.0 | 0.1 | 0.1 | 0.0 | 0.0 | 0.0 |
| Gm19424 | 0.0 | 0.0 | 0.0 | 0.0 | 0.0 | 0.0 | 0.0 | 0.0 | 0.0 | 0.0 | 0.0 | 0.0 |
| Gm1968  | 0.0 | 0.0 | 0.0 | 0.0 | 0.0 | 0.0 | 0.0 | 0.0 | 0.0 | 0.0 | 0.0 | 0.0 |
| Gm19689 | 0.0 | 0.0 | 0.0 | 0.1 | 0.0 | 0.0 | 0.0 | 0.0 | 0.0 | 0.0 | 0.0 | 0.0 |
| Gm19782 | 0.0 | 0.0 | 0.0 | 0.0 | 0.0 | 0.0 | 0.0 | 0.0 | 0.0 | 0.0 | 0.0 | 0.0 |
| Gm1993  | 0.0 | 0.0 | 0.0 | 0.0 | 0.0 | 0.0 | 0.0 | 0.0 | 0.0 | 0.0 | 0.0 | 0.0 |
| Gm1995  | 0.0 | 0.0 | 0.0 | 0.0 | 0.0 | 0.0 | 0.0 | 0.0 | 0.0 | 0.0 | 0.0 | 0.0 |
| Gm20063 | 0.1 | 0.0 | 0.0 | 0.0 | 0.0 | 0.0 | 0.0 | 0.0 | 0.0 | 0.0 | 0.0 | 0.0 |
| Gm20098 | 0.0 | 0.0 | 0.0 | 0.0 | 0.0 | 0.0 | 0.0 | 0.0 | 0.0 | 0.0 | 0.0 | 0.0 |
| Gm2012  | 0.0 | 0.0 | 0.0 | 0.0 | 0.0 | 0.0 | 0.0 | 0.0 | 0.0 | 0.0 | 0.0 | 0.0 |
| Gm20125 | 0.0 | 0.0 | 0.0 | 0.0 | 0.0 | 0.0 | 0.0 | 0.0 | 0.0 | 0.0 | 0.0 | 0.0 |
| Gm20172 | 0.0 | 0.0 | 0.0 | 0.0 | 0.0 | 0.0 | 0.0 | 0.0 | 0.0 | 0.0 | 0.0 | 0.0 |
| Gm20187 | 0.0 | 0.0 | 0.0 | 0.0 | 0.0 | 0.0 | 0.0 | 0.0 | 0.0 | 0.0 | 0.0 | 0.0 |
| Gm2030  | 0.0 | 0.0 | 0.0 | 0.0 | 0.0 | 0.0 | 0.0 | 0.0 | 0.0 | 0.0 | 0.0 | 0.0 |
| Gm2042  | 0.0 | 0.0 | 0.0 | 0.0 | 0.0 | 0.0 | 0.0 | 0.0 | 0.0 | 0.0 | 0.0 | 0.0 |
| Gm20556 | 0.0 | 0.0 | 0.0 | 0.0 | 0.1 | 0.0 | 0.0 | 0.0 | 0.0 | 0.0 | 0.0 | 0.0 |
| Gm2061  | 0.0 | 0.0 | 0.0 | 0.0 | 0.0 | 0.0 | 0.0 | 0.0 | 0.0 | 0.0 | 0.0 | 0.0 |
| Gm20738 | 0.0 | 0.0 | 0.0 | 0.0 | 0.0 | 0.0 | 0.0 | 0.0 | 0.0 | 0.0 | 0.0 | 0.0 |
| Gm20740 | 0.2 | 0.0 | 0.0 | 0.0 | 0.0 | 0.0 | 0.1 | 0.0 | 0.0 | 0.0 | 0.0 | 0.0 |
| Gm20743 | 0.0 | 0.1 | 0.0 | 0.0 | 0.0 | 0.0 | 0.1 | 0.0 | 0.0 | 0.0 | 0.0 | 0.0 |
| Gm20745 | 0.0 | 0.0 | 0.0 | 0.0 | 0.0 | 0.0 | 0.0 | 0.0 | 0.0 | 0.0 | 0.0 | 0.0 |
| Gm20747 | 0.0 | 0.0 | 0.0 | 0.0 | 0.0 | 0.0 | 0.0 | 0.0 | 0.0 | 0.0 | 0.0 | 0.0 |
| Gm20751 | 0.0 | 0.0 | 0.0 | 0.0 | 0.0 | 0.0 | 0.1 | 0.0 | 0.0 | 0.0 | 0.0 | 0.0 |
| Gm20753 | 0.0 | 0.0 | 0.0 | 0.0 | 0.0 | 0.0 | 0.0 | 0.0 | 0.3 | 0.0 | 0.0 | 0.0 |
| Gm20754 | 0.0 | 0.1 | 0.0 | 0.0 | 0.0 | 0.0 | 0.0 | 0.0 | 0.0 | 0.0 | 0.0 | 0.0 |
| Gm20756 | 0.0 | 0.0 | 0.0 | 0.0 | 0.0 | 0.0 | 0.0 | 0.0 | 0.0 | 0.0 | 0.0 | 0.0 |
| Gm20757 | 0.0 | 0.0 | 0.0 | 0.0 | 0.0 | 0.0 | 0.0 | 0.0 | 0.0 | 0.0 | 0.0 | 0.0 |
| Gm20758 | 0.0 | 0.0 | 0.0 | 0.0 | 0.0 | 0.0 | 0.0 | 0.0 | 0.0 | 0.0 | 0.0 | 0.0 |
| Gm20806 | 0.0 | 0.0 | 0.0 | 0.0 | 0.0 | 0.0 | 0.0 | 0.0 | 0.0 | 0.0 | 0.0 | 0.0 |
| Gm20809 | 0.0 | 0.0 | 0.0 | 0.0 | 0.0 | 0.0 | 0.0 | 0.0 | 0.0 | 0.0 | 0.0 | 0.0 |
| Gm20815 | 0.0 | 0.0 | 0.0 | 0.0 | 0.0 | 0.0 | 0.0 | 0.0 | 0.0 | 0.0 | 0.0 | 0.0 |
| Gm20816 | 0.0 | 0.0 | 0.0 | 0.0 | 0.0 | 0.0 | 0.0 | 0.0 | 0.0 | 0.0 | 0.0 | 0.0 |
| Gm20823 | 0.0 | 0.0 | 0.0 | 0.0 | 0.0 | 0.0 | 0.0 | 0.0 | 0.0 | 0.0 | 0.0 | 0.0 |
| Gm2083  | 0.0 | 0.0 | 0.0 | 0.0 | 0.0 | 0.0 | 0.0 | 0.0 | 0.0 | 0.0 | 0.0 | 0.0 |
| Gm20831 | 0.0 | 0.0 | 0.0 | 0.0 | 0.0 | 0.0 | 0.0 | 0.0 | 0.0 | 0.0 | 0.0 | 0.0 |
| Gm20854 | 0.0 | 0.0 | 0.0 | 0.0 | 0.0 | 0.0 | 0.0 | 0.0 | 0.0 | 0.0 | 0.0 | 0.0 |
| Gm20857 | 0.0 | 0.0 | 0.0 | 0.0 | 0.0 | 0.0 | 0.0 | 0.0 | 0.0 | 0.0 | 0.0 | 0.0 |
| Gm20865 | 0.0 | 0.0 | 0.0 | 0.0 | 0.0 | 0.0 | 0.0 | 0.0 | 0.0 | 0.0 | 0.0 | 0.0 |

Excluded Genes

|         |     |     |     |     |     |     |     |     |     |     |     |     |
|---------|-----|-----|-----|-----|-----|-----|-----|-----|-----|-----|-----|-----|
| Gm20867 | 0.0 | 0.0 | 0.0 | 0.0 | 0.0 | 0.0 | 0.0 | 0.0 | 0.0 | 0.0 | 0.0 | 0.0 |
| Gm20871 | 0.0 | 0.0 | 0.0 | 0.0 | 0.0 | 0.0 | 0.0 | 0.0 | 0.0 | 0.0 | 0.0 | 0.0 |
| Gm20917 | 0.0 | 0.0 | 0.0 | 0.0 | 0.0 | 0.0 | 0.0 | 0.0 | 0.0 | 0.0 | 0.0 | 0.0 |
| Gm21057 | 0.0 | 0.3 | 0.0 | 0.0 | 0.1 | 0.0 | 0.0 | 0.0 | 0.0 | 0.3 | 0.0 | 0.0 |
| Gm2109  | 0.0 | 0.0 | 0.0 | 0.0 | 0.0 | 0.0 | 0.0 | 0.0 | 0.0 | 0.0 | 0.0 | 0.0 |
| Gm21637 | 0.0 | 0.0 | 0.0 | 0.1 | 0.0 | 0.0 | 0.0 | 0.0 | 0.0 | 0.0 | 0.0 | 0.0 |
| Gm21693 | 0.0 | 0.0 | 0.0 | 0.0 | 0.0 | 0.0 | 0.0 | 0.0 | 0.0 | 0.0 | 0.0 | 0.0 |
| Gm21708 | 0.0 | 0.0 | 0.0 | 0.0 | 0.0 | 0.0 | 0.0 | 0.0 | 0.0 | 0.0 | 0.0 | 0.0 |
| Gm21943 | 0.0 | 0.0 | 0.0 | 0.0 | 0.0 | 0.0 | 0.0 | 0.0 | 0.0 | 0.0 | 0.0 | 0.0 |
| Gm21944 | 0.0 | 0.0 | 0.0 | 0.0 | 0.5 | 0.0 | 0.0 | 0.0 | 0.0 | 0.0 | 0.0 | 0.0 |
| Gm21947 | 0.0 | 0.0 | 0.0 | 0.0 | 0.1 | 0.0 | 0.0 | 0.0 | 0.0 | 0.0 | 0.0 | 0.0 |
| Gm2447  | 0.0 | 0.0 | 0.0 | 0.0 | 0.0 | 0.0 | 0.0 | 0.0 | 0.0 | 0.0 | 0.0 | 0.0 |
| Gm2663  | 0.0 | 0.0 | 0.0 | 0.0 | 0.0 | 0.0 | 0.0 | 0.0 | 0.0 | 0.0 | 0.0 | 0.0 |
| Gm2762  | 0.1 | 0.0 | 0.0 | 0.0 | 0.0 | 0.0 | 0.0 | 0.0 | 0.0 | 0.0 | 0.1 | 0.0 |
| Gm2799  | 0.0 | 0.0 | 0.0 | 0.0 | 0.0 | 0.0 | 0.0 | 0.0 | 0.0 | 0.0 | 0.0 | 0.0 |
| Gm2837  | 0.0 | 0.0 | 0.0 | 0.2 | 0.0 | 0.0 | 0.0 | 0.0 | 0.0 | 0.0 | 0.0 | 0.0 |
| Gm2848  | 0.0 | 0.0 | 0.0 | 0.0 | 0.0 | 0.0 | 0.0 | 0.0 | 0.0 | 0.0 | 0.0 | 0.0 |
| Gm2913  | 0.0 | 0.0 | 0.0 | 0.0 | 0.0 | 0.0 | 0.0 | 0.0 | 0.0 | 0.0 | 0.0 | 0.0 |
| Gm2933  | 0.0 | 0.0 | 0.0 | 0.0 | 0.0 | 0.0 | 0.0 | 0.0 | 0.0 | 0.0 | 0.0 | 0.0 |
| Gm3139  | 0.0 | 0.0 | 0.0 | 0.0 | 0.0 | 0.0 | 0.0 | 0.0 | 0.0 | 0.0 | 0.0 | 0.0 |
| Gm3143  | 0.0 | 0.0 | 0.0 | 0.0 | 0.0 | 0.0 | 0.0 | 0.2 | 0.0 | 0.0 | 0.0 | 0.0 |
| Gm3259  | 0.0 | 0.0 | 0.0 | 0.0 | 0.0 | 0.0 | 0.0 | 0.0 | 0.0 | 0.0 | 0.0 | 0.0 |
| Gm3286  | 0.0 | 0.0 | 0.0 | 0.0 | 0.0 | 0.0 | 0.0 | 0.0 | 0.0 | 0.0 | 0.0 | 0.0 |
| Gm3336  | 0.0 | 0.0 | 0.0 | 0.0 | 0.1 | 0.0 | 0.0 | 0.0 | 0.0 | 0.1 | 0.0 | 0.0 |
| Gm3404  | 0.0 | 0.0 | 0.0 | 0.0 | 0.0 | 0.0 | 0.0 | 0.0 | 0.0 | 0.0 | 0.0 | 0.0 |
| Gm364   | 0.0 | 0.0 | 0.0 | 0.0 | 0.0 | 0.0 | 0.0 | 0.0 | 0.0 | 0.0 | 0.0 | 0.0 |
| Gm3706  | 0.0 | 0.0 | 0.0 | 0.0 | 0.0 | 0.0 | 0.0 | 0.0 | 0.0 | 0.0 | 0.0 | 0.0 |
| Gm3750  | 0.0 | 0.0 | 0.0 | 0.0 | 0.0 | 0.0 | 0.0 | 0.0 | 0.0 | 0.0 | 0.0 | 0.0 |
| Gm3763  | 0.0 | 0.0 | 0.0 | 0.0 | 0.0 | 0.0 | 0.0 | 0.0 | 0.0 | 0.0 | 0.0 | 0.0 |
| Gm3833  | 0.0 | 0.0 | 0.0 | 0.0 | 0.0 | 0.0 | 0.0 | 0.0 | 0.0 | 0.0 | 0.0 | 0.0 |
| Gm3925  | 0.1 | 0.0 | 0.0 | 0.0 | 0.0 | 0.0 | 0.0 | 0.0 | 0.0 | 0.0 | 0.0 | 0.0 |
| Gm4064  | 0.0 | 0.0 | 0.0 | 0.0 | 0.0 | 0.0 | 0.0 | 0.0 | 0.0 | 0.0 | 0.0 | 0.0 |
| Gm410   | 0.0 | 0.0 | 0.0 | 0.0 | 0.0 | 0.0 | 0.0 | 0.0 | 0.0 | 0.0 | 0.0 | 0.0 |
| Gm4133  | 0.0 | 0.0 | 0.0 | 0.0 | 0.0 | 0.0 | 0.0 | 0.0 | 0.0 | 0.0 | 0.0 | 0.0 |
| Gm4187  | 0.0 | 0.0 | 0.0 | 0.0 | 0.0 | 0.0 | 0.0 | 0.0 | 0.0 | 0.0 | 0.0 | 0.0 |
| Gm4224  | 0.0 | 0.0 | 0.0 | 0.0 | 0.0 | 0.0 | 0.0 | 0.0 | 0.0 | 0.0 | 0.0 | 0.0 |
| Gm4278  | 0.0 | 0.0 | 0.0 | 0.0 | 0.0 | 0.0 | 0.0 | 0.0 | 0.0 | 0.0 | 0.0 | 0.0 |
| Gm428   | 0.0 | 0.0 | 0.0 | 0.0 | 0.0 | 0.0 | 0.0 | 0.0 | 0.0 | 0.0 | 0.0 | 0.0 |
| Gm4297  | 0.0 | 0.0 | 0.0 | 0.0 | 0.0 | 0.0 | 0.0 | 0.0 | 0.0 | 0.0 | 0.0 | 0.0 |
| Gm4301  | 0.0 | 0.0 | 0.0 | 0.0 | 0.0 | 0.0 | 0.0 | 0.0 | 0.0 | 0.0 | 0.0 | 0.0 |
| Gm4302  | 0.0 | 0.0 | 0.0 | 0.0 | 0.0 | 0.0 | 0.0 | 0.0 | 0.0 | 0.0 | 0.0 | 0.0 |
| Gm4303  | 0.0 | 0.0 | 0.0 | 0.0 | 0.0 | 0.0 | 0.0 | 0.0 | 0.0 | 0.0 | 0.0 | 0.0 |
| Gm4312  | 0.0 | 0.0 | 0.0 | 0.0 | 0.0 | 0.0 | 0.0 | 0.0 | 0.0 | 0.0 | 0.0 | 0.0 |
| Gm4371  | 0.0 | 0.0 | 0.0 | 0.0 | 0.0 | 0.0 | 0.0 | 0.0 | 0.0 | 0.0 | 0.0 | 0.0 |
| Gm438   | 0.0 | 0.1 | 0.0 | 0.0 | 0.0 | 0.0 | 0.0 | 0.1 | 0.0 | 0.0 | 0.0 | 0.0 |
| Gm4461  | 0.1 | 0.0 | 0.0 | 0.0 | 0.0 | 0.1 | 0.0 | 0.0 | 0.0 | 0.0 | 0.0 | 0.0 |
| Gm4489  | 0.0 | 0.0 | 0.2 | 0.3 | 0.0 | 0.0 | 0.0 | 0.0 | 0.0 | 0.0 | 0.0 | 0.0 |
| Gm4567  | 0.0 | 0.0 | 0.0 | 0.0 | 0.0 | 0.0 | 0.0 | 0.0 | 0.0 | 0.0 | 0.0 | 0.0 |
| Gm4598  | 0.0 | 0.0 | 0.0 | 0.1 | 0.0 | 0.0 | 0.0 | 0.0 | 0.0 | 0.0 | 0.0 | 0.0 |
| Gm4745  | 0.0 | 0.0 | 0.0 | 0.0 | 0.0 | 0.0 | 0.0 | 0.0 | 0.0 | 0.0 | 0.0 | 0.0 |
| Gm4776  | 0.0 | 0.0 | 0.0 | 0.0 | 0.0 | 0.0 | 0.0 | 0.0 | 0.0 | 0.0 | 0.0 | 0.0 |
| Gm4791  | 0.0 | 0.0 | 0.1 | 0.0 | 0.0 | 0.0 | 0.0 | 0.0 | 0.0 | 0.0 | 0.0 | 0.0 |
| Gm4792  | 0.0 | 0.0 | 0.0 | 0.0 | 0.0 | 0.1 | 0.0 | 0.0 | 0.0 | 0.0 | 0.0 | 0.0 |
| Gm4814  | 0.0 | 0.0 | 0.0 | 0.0 | 0.0 | 0.0 | 0.0 | 0.0 | 0.0 | 0.0 | 0.0 | 0.0 |
| Gm4827  | 0.0 | 0.0 | 0.0 | 0.0 | 0.0 | 0.1 | 0.0 | 0.0 | 0.0 | 0.0 | 0.0 | 0.0 |
| Gm4847  | 0.0 | 0.0 | 0.0 | 0.0 | 0.0 | 0.0 | 0.0 | 0.0 | 0.0 | 0.0 | 0.0 | 0.0 |
| Gm4850  | 0.0 | 0.0 | 0.0 | 0.0 | 0.0 | 0.1 | 0.0 | 0.0 | 0.0 | 0.0 | 0.0 | 0.0 |

Excluded Genes

|        |     |     |     |     |     |     |     |     |     |     |     |     |
|--------|-----|-----|-----|-----|-----|-----|-----|-----|-----|-----|-----|-----|
| Gm4858 | 0.1 | 0.1 | 0.0 | 0.1 | 0.0 | 0.0 | 0.0 | 0.0 | 0.0 | 0.0 | 0.0 | 0.0 |
| Gm4861 | 0.0 | 0.0 | 0.0 | 0.0 | 0.0 | 0.0 | 0.2 | 0.0 | 0.1 | 0.0 | 0.0 | 0.0 |
| Gm4871 | 0.0 | 0.0 | 0.0 | 0.0 | 0.0 | 0.0 | 0.0 | 0.0 | 0.0 | 0.0 | 0.0 | 0.0 |
| Gm4894 | 0.0 | 0.0 | 0.0 | 0.0 | 0.0 | 0.0 | 0.0 | 0.0 | 0.0 | 0.0 | 0.0 | 0.0 |
| Gm4922 | 0.0 | 0.0 | 0.0 | 0.0 | 0.0 | 0.0 | 0.0 | 0.0 | 0.0 | 0.0 | 0.0 | 0.0 |
| Gm4937 | 0.0 | 0.0 | 0.0 | 0.0 | 0.0 | 0.0 | 0.0 | 0.0 | 0.0 | 0.0 | 0.0 | 0.0 |
| Gm4956 | 0.0 | 0.0 | 0.0 | 0.0 | 0.1 | 0.0 | 0.1 | 0.0 | 0.0 | 0.0 | 0.0 | 0.0 |
| Gm4975 | 0.0 | 0.0 | 0.0 | 0.0 | 0.0 | 0.0 | 0.0 | 0.0 | 0.0 | 0.0 | 0.0 | 0.0 |
| Gm4981 | 0.0 | 0.0 | 0.0 | 0.0 | 0.0 | 0.0 | 0.0 | 0.0 | 0.0 | 0.0 | 0.0 | 0.0 |
| Gm5065 | 0.0 | 0.0 | 0.0 | 0.0 | 0.0 | 0.0 | 0.0 | 0.0 | 0.0 | 0.0 | 0.0 | 0.0 |
| Gm5083 | 0.0 | 0.0 | 0.0 | 0.0 | 0.0 | 0.0 | 0.0 | 0.0 | 0.0 | 0.0 | 0.0 | 0.0 |
| Gm5084 | 0.0 | 0.0 | 0.0 | 0.0 | 0.0 | 0.0 | 0.0 | 0.0 | 0.0 | 0.0 | 0.0 | 0.0 |
| Gm5089 | 0.0 | 0.0 | 0.0 | 0.0 | 0.1 | 0.0 | 0.0 | 0.0 | 0.0 | 0.0 | 0.0 | 0.0 |
| Gm5091 | 0.0 | 0.0 | 0.0 | 0.0 | 0.0 | 0.0 | 0.0 | 0.0 | 0.0 | 0.0 | 0.0 | 0.0 |
| Gm5108 | 0.0 | 0.0 | 0.0 | 0.0 | 0.0 | 0.1 | 0.0 | 0.0 | 0.0 | 0.0 | 0.0 | 0.0 |
| Gm5134 | 0.0 | 0.0 | 0.0 | 0.0 | 0.0 | 0.0 | 0.1 | 0.0 | 0.0 | 0.0 | 0.0 | 0.0 |
| Gm5168 | 0.0 | 0.0 | 0.0 | 0.0 | 0.0 | 0.0 | 0.0 | 0.0 | 0.0 | 0.0 | 0.0 | 0.0 |
| Gm5169 | 0.0 | 0.0 | 0.0 | 0.0 | 0.0 | 0.0 | 0.0 | 0.0 | 0.0 | 0.0 | 0.0 | 0.0 |
| Gm525  | 0.0 | 0.0 | 0.0 | 0.0 | 0.0 | 0.0 | 0.1 | 0.0 | 0.0 | 0.0 | 0.0 | 0.0 |
| Gm5294 | 0.0 | 0.0 | 0.1 | 0.0 | 0.0 | 0.0 | 0.0 | 0.0 | 0.0 | 0.0 | 0.0 | 0.0 |
| Gm5382 | 0.0 | 0.0 | 0.0 | 0.0 | 0.0 | 0.0 | 0.0 | 0.0 | 0.0 | 0.0 | 0.3 | 0.0 |
| Gm5420 | 0.0 | 0.0 | 0.0 | 0.0 | 0.0 | 0.0 | 0.0 | 0.0 | 0.0 | 0.0 | 0.0 | 0.0 |
| Gm5460 | 0.0 | 0.0 | 0.0 | 0.0 | 0.0 | 0.0 | 0.0 | 0.0 | 0.0 | 0.0 | 0.0 | 0.0 |
| Gm5483 | 0.0 | 0.0 | 0.0 | 0.0 | 0.1 | 0.0 | 0.0 | 0.0 | 0.0 | 0.0 | 0.0 | 0.0 |
| Gm5535 | 0.0 | 0.0 | 0.0 | 0.0 | 0.0 | 0.0 | 0.0 | 0.0 | 0.0 | 0.0 | 0.0 | 0.0 |
| Gm5547 | 0.0 | 0.0 | 0.0 | 0.0 | 0.2 | 0.0 | 0.0 | 0.0 | 0.0 | 0.2 | 0.0 | 0.0 |
| Gm5591 | 0.0 | 0.0 | 0.0 | 0.0 | 0.0 | 0.0 | 0.0 | 0.0 | 0.0 | 0.0 | 0.0 | 0.0 |
| Gm5592 | 0.0 | 0.0 | 0.0 | 0.0 | 0.0 | 0.0 | 0.0 | 0.0 | 0.0 | 0.0 | 0.0 | 0.0 |
| Gm5615 | 0.0 | 0.0 | 0.0 | 0.0 | 0.0 | 0.0 | 0.0 | 0.0 | 0.0 | 0.0 | 0.0 | 0.0 |
| Gm5622 | 0.0 | 0.0 | 0.0 | 0.0 | 0.0 | 0.0 | 0.0 | 0.0 | 0.0 | 0.0 | 0.0 | 0.0 |
| Gm5640 | 0.0 | 0.0 | 0.0 | 0.0 | 0.0 | 0.0 | 0.0 | 0.0 | 0.0 | 0.0 | 0.0 | 0.0 |
| Gm5725 | 0.0 | 0.0 | 0.0 | 0.0 | 0.0 | 0.0 | 0.0 | 0.0 | 0.0 | 0.0 | 0.0 | 0.0 |
| Gm5728 | 0.0 | 0.0 | 0.0 | 0.0 | 0.0 | 0.0 | 0.0 | 0.0 | 0.0 | 0.0 | 0.0 | 0.0 |
| Gm5741 | 0.0 | 0.0 | 0.0 | 0.0 | 0.0 | 0.0 | 0.0 | 0.0 | 0.0 | 0.0 | 0.0 | 0.0 |
| Gm5797 | 0.0 | 0.0 | 0.0 | 0.0 | 0.0 | 0.0 | 0.0 | 0.0 | 0.0 | 0.0 | 0.1 | 0.0 |
| Gm5833 | 0.0 | 0.0 | 0.0 | 0.0 | 0.0 | 0.0 | 0.0 | 0.0 | 0.0 | 0.0 | 0.0 | 0.0 |
| Gm5886 | 0.0 | 0.0 | 0.0 | 0.0 | 0.0 | 0.0 | 0.1 | 0.0 | 0.0 | 0.0 | 0.0 | 0.0 |
| Gm5891 | 0.0 | 0.0 | 0.0 | 0.0 | 0.0 | 0.0 | 0.0 | 0.0 | 0.0 | 0.0 | 0.0 | 0.0 |
| Gm5934 | 0.0 | 0.0 | 0.0 | 0.1 | 0.0 | 0.0 | 0.0 | 0.0 | 0.0 | 0.0 | 0.0 | 0.0 |
| Gm5935 | 0.0 | 0.0 | 0.0 | 0.0 | 0.0 | 0.0 | 0.0 | 0.0 | 0.0 | 0.0 | 0.0 | 0.0 |
| Gm5936 | 0.0 | 0.0 | 0.0 | 0.0 | 0.0 | 0.0 | 0.0 | 0.0 | 0.0 | 0.0 | 0.0 | 0.0 |
| Gm5941 | 0.0 | 0.0 | 0.0 | 0.0 | 0.0 | 0.0 | 0.0 | 0.0 | 0.0 | 0.0 | 0.0 | 0.1 |
| Gm597  | 0.0 | 0.0 | 0.0 | 0.0 | 0.0 | 0.0 | 0.0 | 0.0 | 0.0 | 0.0 | 0.0 | 0.0 |
| Gm609  | 0.0 | 0.0 | 0.0 | 0.0 | 0.0 | 0.0 | 0.0 | 0.0 | 0.0 | 0.0 | 0.0 | 0.0 |
| Gm6116 | 0.1 | 0.0 | 0.0 | 0.0 | 0.0 | 0.1 | 0.1 | 0.1 | 0.0 | 0.1 | 0.0 | 0.0 |
| Gm6121 | 0.0 | 0.0 | 0.0 | 0.0 | 0.0 | 0.0 | 0.0 | 0.0 | 0.0 | 0.0 | 0.0 | 0.0 |
| Gm614  | 0.0 | 0.0 | 0.0 | 0.1 | 0.0 | 0.0 | 0.1 | 0.0 | 0.0 | 0.0 | 0.0 | 0.0 |
| Gm6164 | 0.0 | 0.0 | 0.0 | 0.0 | 0.0 | 0.0 | 0.0 | 0.0 | 0.0 | 0.0 | 0.0 | 0.0 |
| Gm6249 | 0.0 | 0.0 | 0.0 | 0.0 | 0.0 | 0.0 | 0.0 | 0.0 | 0.0 | 0.0 | 0.0 | 0.0 |
| Gm6289 | 0.0 | 0.0 | 0.0 | 0.0 | 0.0 | 0.0 | 0.0 | 0.0 | 0.0 | 0.0 | 0.0 | 0.0 |
| Gm6300 | 0.0 | 0.0 | 0.0 | 0.0 | 0.0 | 0.0 | 0.0 | 0.0 | 0.0 | 0.0 | 0.0 | 0.0 |
| Gm6307 | 0.0 | 0.0 | 0.0 | 0.1 | 0.0 | 0.0 | 0.0 | 0.0 | 0.0 | 0.0 | 0.0 | 0.0 |
| Gm6329 | 0.0 | 0.1 | 0.0 | 0.0 | 0.1 | 0.0 | 0.1 | 0.0 | 0.0 | 0.0 | 0.0 | 0.0 |
| Gm6367 | 0.0 | 0.0 | 0.0 | 0.0 | 0.0 | 0.0 | 0.0 | 0.0 | 0.0 | 0.0 | 0.0 | 0.0 |
| Gm6408 | 0.0 | 0.0 | 0.0 | 0.0 | 0.0 | 0.0 | 0.0 | 0.0 | 0.0 | 0.0 | 0.0 | 0.0 |
| Gm6416 | 0.0 | 0.0 | 0.0 | 0.0 | 0.0 | 0.0 | 0.0 | 0.0 | 0.0 | 0.0 | 0.0 | 0.0 |
| Gm648  | 0.0 | 0.0 | 0.0 | 0.0 | 0.0 | 0.0 | 0.0 | 0.0 | 0.0 | 0.0 | 0.0 | 0.0 |

Excluded Genes

|         |     |     |     |     |     |     |     |     |     |     |     |     |
|---------|-----|-----|-----|-----|-----|-----|-----|-----|-----|-----|-----|-----|
| Gm6531  | 0.0 | 0.0 | 0.0 | 0.0 | 0.0 | 0.0 | 0.0 | 0.0 | 0.0 | 0.0 | 0.0 | 0.0 |
| Gm6588  | 0.0 | 0.0 | 0.0 | 0.0 | 0.0 | 0.0 | 0.0 | 0.0 | 0.0 | 0.0 | 0.0 | 0.0 |
| Gm6592  | 0.0 | 0.0 | 0.0 | 0.0 | 0.0 | 0.0 | 0.0 | 0.0 | 0.0 | 0.0 | 0.0 | 0.0 |
| Gm6602  | 0.0 | 0.0 | 0.0 | 0.0 | 0.0 | 0.0 | 0.0 | 0.0 | 0.0 | 0.0 | 0.0 | 0.0 |
| Gm6614  | 0.0 | 0.0 | 0.0 | 0.0 | 0.0 | 0.0 | 0.0 | 0.0 | 0.0 | 0.0 | 0.0 | 0.0 |
| Gm6772  | 0.0 | 0.0 | 0.0 | 0.0 | 0.0 | 0.0 | 0.0 | 0.0 | 0.0 | 0.0 | 0.0 | 0.0 |
| Gm6792  | 0.0 | 0.1 | 0.0 | 0.0 | 0.0 | 0.0 | 0.0 | 0.0 | 0.0 | 0.0 | 0.0 | 0.0 |
| Gm6890  | 0.0 | 0.0 | 0.0 | 0.0 | 0.0 | 0.0 | 0.0 | 0.0 | 0.0 | 0.0 | 0.0 | 0.0 |
| Gm6902  | 0.0 | 0.0 | 0.0 | 0.0 | 0.0 | 0.0 | 0.0 | 0.0 | 0.0 | 0.0 | 0.0 | 0.0 |
| Gm6994  | 0.0 | 0.0 | 0.0 | 0.0 | 0.0 | 0.0 | 0.0 | 0.0 | 0.0 | 0.0 | 0.0 | 0.0 |
| Gm7008  | 0.0 | 0.0 | 0.0 | 0.0 | 0.0 | 0.2 | 0.0 | 0.1 | 0.0 | 0.0 | 0.0 | 0.2 |
| Gm7104  | 0.0 | 0.0 | 0.0 | 0.0 | 0.0 | 0.0 | 0.0 | 0.0 | 0.0 | 0.0 | 0.0 | 0.0 |
| Gm7271  | 0.0 | 0.0 | 0.0 | 0.0 | 0.0 | 0.0 | 0.0 | 0.0 | 0.0 | 0.0 | 0.0 | 0.0 |
| Gm7325  | 0.0 | 0.0 | 0.0 | 0.0 | 0.0 | 0.0 | 0.0 | 0.1 | 0.0 | 0.0 | 0.0 | 0.0 |
| Gm7337  | 0.0 | 0.0 | 0.0 | 0.0 | 0.0 | 0.0 | 0.0 | 0.0 | 0.0 | 0.0 | 0.0 | 0.0 |
| Gm7457  | 0.0 | 0.0 | 0.0 | 0.0 | 0.0 | 0.0 | 0.0 | 0.0 | 0.0 | 0.0 | 0.0 | 0.0 |
| Gm7534  | 0.0 | 0.0 | 0.0 | 0.0 | 0.0 | 0.0 | 0.0 | 0.0 | 0.0 | 0.0 | 0.0 | 0.0 |
| Gm7550  | 0.0 | 0.0 | 0.0 | 0.0 | 0.0 | 0.0 | 0.0 | 0.1 | 0.0 | 0.0 | 0.0 | 0.0 |
| Gm757   | 0.0 | 0.0 | 0.0 | 0.0 | 0.0 | 0.1 | 0.0 | 0.0 | 0.0 | 0.0 | 0.0 | 0.0 |
| Gm765   | 0.0 | 0.0 | 0.0 | 0.0 | 0.0 | 0.0 | 0.0 | 0.1 | 0.0 | 0.0 | 0.0 | 0.0 |
| Gm7714  | 0.0 | 0.0 | 0.0 | 0.0 | 0.0 | 0.1 | 0.0 | 0.0 | 0.0 | 0.0 | 0.0 | 0.0 |
| Gm7903  | 0.0 | 0.0 | 0.0 | 0.0 | 0.0 | 0.0 | 0.0 | 0.0 | 0.0 | 0.0 | 0.0 | 0.0 |
| Gm7978  | 0.0 | 0.0 | 0.0 | 0.0 | 0.0 | 0.0 | 0.0 | 0.0 | 0.0 | 0.0 | 0.0 | 0.0 |
| Gm805   | 0.0 | 0.0 | 0.0 | 0.0 | 0.0 | 0.0 | 0.0 | 0.0 | 0.0 | 0.0 | 0.0 | 0.0 |
| Gm8179  | 0.0 | 0.0 | 0.0 | 0.0 | 0.0 | 0.0 | 0.0 | 0.0 | 0.0 | 0.0 | 0.0 | 0.0 |
| Gm8221  | 0.0 | 0.0 | 0.0 | 0.0 | 0.0 | 0.0 | 0.0 | 0.0 | 0.0 | 0.0 | 0.0 | 0.0 |
| Gm826   | 0.0 | 0.0 | 0.0 | 0.0 | 0.0 | 0.1 | 0.0 | 0.0 | 0.0 | 0.0 | 0.0 | 0.0 |
| Gm8267  | 0.0 | 0.0 | 0.0 | 0.0 | 0.0 | 0.0 | 0.0 | 0.0 | 0.0 | 0.0 | 0.0 | 0.0 |
| Gm833   | 0.0 | 0.0 | 0.0 | 0.0 | 0.0 | 0.0 | 0.0 | 0.0 | 0.0 | 0.0 | 0.0 | 0.0 |
| Gm8363  | 0.0 | 0.0 | 0.0 | 0.0 | 0.0 | 0.0 | 0.0 | 0.0 | 0.0 | 0.0 | 0.0 | 0.0 |
| Gm8439  | 0.0 | 0.0 | 0.0 | 0.0 | 0.0 | 0.0 | 0.0 | 0.0 | 0.0 | 0.0 | 0.0 | 0.0 |
| Gm8693  | 0.0 | 0.0 | 0.0 | 0.0 | 0.0 | 0.0 | 0.0 | 0.0 | 0.0 | 0.0 | 0.0 | 0.0 |
| Gm8709  | 0.0 | 0.0 | 0.1 | 0.0 | 0.0 | 0.0 | 0.0 | 0.0 | 0.0 | 0.0 | 0.0 | 0.0 |
| Gm872   | 0.0 | 0.0 | 0.0 | 0.0 | 0.0 | 0.0 | 0.0 | 0.0 | 0.0 | 0.0 | 0.0 | 0.0 |
| Gm8720  | 0.0 | 0.0 | 0.0 | 0.0 | 0.0 | 0.0 | 0.0 | 0.0 | 0.0 | 0.0 | 0.0 | 0.0 |
| Gm884   | 0.0 | 0.0 | 0.0 | 0.0 | 0.0 | 0.0 | 0.0 | 0.0 | 0.0 | 0.0 | 0.0 | 0.0 |
| Gm8884  | 0.3 | 0.0 | 0.1 | 0.0 | 0.0 | 0.0 | 0.0 | 0.0 | 0.0 | 0.0 | 0.0 | 0.0 |
| Gm889   | 0.1 | 0.1 | 0.0 | 0.0 | 0.0 | 0.0 | 0.0 | 0.0 | 0.0 | 0.1 | 0.0 | 0.0 |
| Gm9047  | 0.0 | 0.0 | 0.0 | 0.2 | 0.0 | 0.0 | 0.0 | 0.0 | 0.0 | 0.0 | 0.0 | 0.1 |
| Gm9125  | 0.0 | 0.0 | 0.0 | 0.0 | 0.0 | 0.0 | 0.0 | 0.0 | 0.0 | 0.0 | 0.0 | 0.0 |
| Gm9376  | 0.0 | 0.0 | 0.0 | 0.0 | 0.0 | 0.0 | 0.0 | 0.0 | 0.0 | 0.0 | 0.0 | 0.0 |
| Gm9573  | 0.0 | 0.0 | 0.0 | 0.0 | 0.0 | 0.0 | 0.0 | 0.0 | 0.0 | 0.0 | 0.0 | 0.0 |
| Gm9758  | 0.0 | 0.0 | 0.0 | 0.0 | 0.0 | 0.0 | 0.0 | 0.0 | 0.0 | 0.0 | 0.0 | 0.0 |
| Gm9839  | 0.0 | 0.0 | 0.0 | 0.0 | 0.0 | 0.0 | 0.0 | 0.0 | 0.0 | 0.0 | 0.0 | 0.0 |
| Gm9926  | 0.0 | 0.0 | 0.0 | 0.0 | 0.0 | 0.0 | 0.0 | 0.0 | 0.0 | 0.0 | 0.0 | 0.0 |
| Gm9962  | 0.0 | 0.0 | 0.0 | 0.0 | 0.0 | 0.0 | 0.0 | 0.0 | 0.0 | 0.0 | 0.0 | 0.0 |
| Gm9999  | 0.0 | 0.0 | 0.0 | 0.0 | 0.0 | 0.0 | 0.0 | 0.1 | 0.0 | 0.0 | 0.0 | 0.0 |
| Gmcl1l  | 0.0 | 0.0 | 0.0 | 0.0 | 0.0 | 0.0 | 0.0 | 0.0 | 0.0 | 0.0 | 0.0 | 0.0 |
| Gml     | 0.0 | 0.0 | 0.0 | 0.0 | 0.0 | 0.2 | 0.1 | 0.0 | 0.0 | 0.0 | 0.0 | 0.0 |
| Gmnc    | 0.0 | 0.0 | 0.0 | 0.0 | 0.0 | 0.0 | 0.0 | 0.0 | 0.0 | 0.0 | 0.0 | 0.0 |
| Gnat3   | 0.0 | 0.0 | 0.0 | 0.0 | 0.0 | 0.0 | 0.0 | 0.0 | 0.0 | 0.0 | 0.0 | 0.0 |
| Gngt1   | 0.0 | 0.0 | 0.0 | 0.0 | 0.0 | 0.0 | 0.0 | 0.0 | 0.0 | 0.0 | 0.0 | 0.0 |
| Gnmt    | 0.0 | 0.0 | 0.0 | 0.0 | 0.1 | 0.1 | 0.0 | 0.0 | 0.2 | 0.0 | 0.0 | 0.0 |
| Gnrhr   | 0.0 | 0.0 | 0.0 | 0.0 | 0.0 | 0.0 | 0.0 | 0.0 | 0.0 | 0.0 | 0.0 | 0.0 |
| Golga7b | 0.0 | 0.0 | 0.0 | 0.0 | 0.0 | 0.0 | 0.0 | 0.1 | 0.0 | 0.0 | 0.0 | 0.0 |
| Gp2     | 0.0 | 0.0 | 0.0 | 0.0 | 0.0 | 0.0 | 0.0 | 0.0 | 0.0 | 0.0 | 0.0 | 0.0 |
| Gp9     | 0.0 | 0.1 | 0.0 | 0.4 | 0.0 | 0.0 | 0.0 | 0.1 | 0.0 | 0.0 | 0.0 | 0.0 |

Excluded Genes



|          |     |     |     |     |     |     |     |     |     |     |     |     |
|----------|-----|-----|-----|-----|-----|-----|-----|-----|-----|-----|-----|-----|
| Gpa33    | 0.0 | 0.0 | 0.0 | 0.0 | 0.0 | 0.0 | 0.0 | 0.0 | 0.0 | 0.0 | 0.0 | 0.0 |
| Gphb5    | 0.0 | 0.0 | 0.0 | 0.0 | 0.0 | 0.0 | 0.0 | 0.0 | 0.0 | 0.0 | 0.0 | 0.0 |
| Gpr101   | 0.0 | 0.0 | 0.0 | 0.0 | 0.0 | 0.0 | 0.0 | 0.0 | 0.0 | 0.0 | 0.0 | 0.0 |
| Gpr113   | 0.0 | 0.0 | 0.0 | 0.0 | 0.0 | 0.0 | 0.0 | 0.0 | 0.0 | 0.0 | 0.0 | 0.0 |
| Gpr114   | 0.0 | 0.0 | 0.0 | 0.0 | 0.0 | 0.0 | 0.0 | 0.0 | 0.0 | 0.0 | 0.0 | 0.0 |
| Gpr119   | 0.0 | 0.0 | 0.0 | 0.0 | 0.0 | 0.0 | 0.0 | 0.0 | 0.0 | 0.0 | 0.0 | 0.0 |
| Gpr139   | 0.0 | 0.0 | 0.0 | 0.0 | 0.0 | 0.0 | 0.0 | 0.0 | 0.0 | 0.0 | 0.0 | 0.0 |
| Gpr149   | 0.0 | 0.0 | 0.0 | 0.0 | 0.0 | 0.0 | 0.0 | 0.0 | 0.0 | 0.0 | 0.0 | 0.0 |
| Gpr15    | 0.0 | 0.0 | 0.1 | 0.0 | 0.0 | 0.1 | 0.0 | 0.0 | 0.0 | 0.0 | 0.0 | 0.0 |
| Gpr150   | 0.0 | 0.0 | 0.0 | 0.0 | 0.0 | 0.0 | 0.0 | 0.0 | 0.0 | 0.0 | 0.0 | 0.0 |
| Gpr158   | 0.0 | 0.0 | 0.0 | 0.0 | 0.0 | 0.0 | 0.0 | 0.0 | 0.0 | 0.0 | 0.0 | 0.0 |
| Gpr171   | 0.0 | 0.0 | 0.0 | 0.0 | 0.0 | 0.0 | 0.0 | 0.0 | 0.0 | 0.0 | 0.0 | 0.0 |
| Gpr174   | 0.0 | 0.0 | 0.0 | 0.0 | 0.0 | 0.0 | 0.0 | 0.0 | 0.0 | 0.0 | 0.0 | 0.0 |
| Gpr25    | 0.0 | 0.0 | 0.0 | 0.0 | 0.0 | 0.0 | 0.0 | 0.0 | 0.0 | 0.0 | 0.0 | 0.0 |
| Gpr26    | 0.0 | 0.0 | 0.0 | 0.0 | 0.0 | 0.0 | 0.0 | 0.0 | 0.0 | 0.0 | 0.0 | 0.0 |
| Gpr33    | 0.0 | 0.0 | 0.0 | 0.0 | 0.0 | 0.0 | 0.0 | 0.0 | 0.0 | 0.0 | 0.0 | 0.0 |
| Gpr37/1  | 0.0 | 0.0 | 0.0 | 0.0 | 0.0 | 0.0 | 0.0 | 0.0 | 0.0 | 0.0 | 0.0 | 0.0 |
| Gpr50    | 0.0 | 0.0 | 0.0 | 0.0 | 0.0 | 0.0 | 0.0 | 0.0 | 0.0 | 0.0 | 0.0 | 0.0 |
| Gpr87    | 0.0 | 0.0 | 0.0 | 0.0 | 0.0 | 0.0 | 0.0 | 0.0 | 0.0 | 0.0 | 0.0 | 0.0 |
| Gprc5d   | 0.0 | 0.0 | 0.0 | 0.0 | 0.0 | 0.0 | 0.0 | 0.0 | 0.0 | 0.0 | 0.0 | 0.0 |
| Gpx2-ps1 | 0.0 | 0.0 | 0.0 | 0.1 | 0.1 | 0.0 | 0.0 | 0.0 | 0.0 | 0.2 | 0.0 | 0.0 |
| Gpx5     | 0.0 | 0.0 | 0.0 | 0.1 | 0.0 | 0.1 | 0.0 | 0.0 | 0.0 | 0.0 | 0.0 | 0.0 |
| Gpx6     | 0.0 | 0.0 | 0.0 | 0.0 | 0.0 | 0.0 | 0.0 | 0.0 | 0.0 | 0.0 | 0.0 | 0.0 |
| Grb7     | 0.0 | 0.0 | 0.0 | 0.0 | 0.0 | 0.0 | 0.0 | 0.0 | 0.0 | 0.0 | 0.0 | 0.0 |
| Grhl2    | 0.0 | 0.0 | 0.0 | 0.0 | 0.0 | 0.0 | 0.0 | 0.0 | 0.0 | 0.0 | 0.0 | 0.0 |
| Gria2    | 0.0 | 0.0 | 0.0 | 0.0 | 0.0 | 0.0 | 0.0 | 0.0 | 0.0 | 0.0 | 0.0 | 0.0 |
| Grid1    | 0.0 | 0.0 | 0.0 | 0.0 | 0.0 | 0.0 | 0.0 | 0.0 | 0.0 | 0.0 | 0.0 | 0.0 |
| Grid2    | 0.0 | 0.0 | 0.0 | 0.0 | 0.0 | 0.0 | 0.0 | 0.0 | 0.0 | 0.0 | 0.0 | 0.0 |
| Grin2a   | 0.0 | 0.0 | 0.0 | 0.0 | 0.0 | 0.0 | 0.0 | 0.0 | 0.0 | 0.0 | 0.0 | 0.0 |
| Grm4     | 0.0 | 0.0 | 0.0 | 0.0 | 0.0 | 0.0 | 0.0 | 0.0 | 0.0 | 0.0 | 0.0 | 0.0 |
| Grm6     | 0.0 | 0.0 | 0.0 | 0.0 | 0.0 | 0.0 | 0.0 | 0.0 | 0.0 | 0.0 | 0.0 | 0.0 |
| Grm8     | 0.0 | 0.0 | 0.0 | 0.0 | 0.0 | 0.0 | 0.0 | 0.0 | 0.0 | 0.0 | 0.0 | 0.0 |
| Grpr     | 0.0 | 0.0 | 0.0 | 0.0 | 0.0 | 0.0 | 0.0 | 0.0 | 0.0 | 0.0 | 0.0 | 0.0 |
| Gsc2     | 0.0 | 0.0 | 0.1 | 0.0 | 0.0 | 0.0 | 0.0 | 0.0 | 0.0 | 0.0 | 0.0 | 0.0 |
| Gsdma3   | 0.0 | 0.0 | 0.0 | 0.0 | 0.0 | 0.1 | 0.0 | 0.0 | 0.0 | 0.0 | 0.0 | 0.0 |
| Gsdmc    | 0.0 | 0.0 | 0.0 | 0.0 | 0.0 | 0.0 | 0.0 | 0.0 | 0.0 | 0.0 | 0.0 | 0.0 |
| Gsdmc2   | 0.0 | 0.0 | 0.0 | 0.0 | 0.0 | 0.0 | 0.0 | 0.0 | 0.0 | 0.0 | 0.0 | 0.0 |
| Gsdmc3   | 0.0 | 0.0 | 0.0 | 0.0 | 0.0 | 0.0 | 0.0 | 0.0 | 0.0 | 0.0 | 0.0 | 0.0 |
| Gsdmcl1  | 0.0 | 0.0 | 0.0 | 0.0 | 0.0 | 0.0 | 0.0 | 0.0 | 0.0 | 0.0 | 0.0 | 0.0 |
| Gstt4    | 0.0 | 0.0 | 0.0 | 0.0 | 0.0 | 0.0 | 0.0 | 0.0 | 0.0 | 0.0 | 0.0 | 0.0 |
| Gtsf1    | 0.0 | 0.1 | 0.0 | 0.0 | 0.0 | 0.0 | 0.0 | 0.0 | 0.0 | 0.0 | 0.0 | 0.0 |
| Gtsf11   | 0.0 | 0.0 | 0.0 | 0.0 | 0.0 | 0.0 | 0.0 | 0.0 | 0.0 | 0.0 | 0.0 | 0.0 |
| Guca2a   | 0.0 | 0.0 | 0.0 | 0.0 | 0.0 | 0.0 | 0.0 | 0.0 | 0.0 | 0.0 | 0.0 | 0.1 |
| Guca2b   | 0.1 | 0.0 | 0.0 | 0.0 | 0.0 | 0.0 | 0.0 | 0.0 | 0.0 | 0.0 | 0.0 | 0.0 |
| Gucy1b2  | 0.0 | 0.0 | 0.0 | 0.0 | 0.0 | 0.0 | 0.0 | 0.0 | 0.0 | 0.0 | 0.0 | 0.0 |
| Gucy2d   | 0.0 | 0.0 | 0.0 | 0.0 | 0.0 | 0.0 | 0.0 | 0.0 | 0.0 | 0.0 | 0.0 | 0.0 |
| Gucy2f   | 0.0 | 0.0 | 0.0 | 0.0 | 0.0 | 0.0 | 0.0 | 0.0 | 0.0 | 0.0 | 0.0 | 0.0 |
| Gulo     | 0.0 | 0.0 | 0.0 | 0.0 | 0.0 | 0.0 | 0.0 | 0.0 | 0.0 | 0.0 | 0.0 | 0.0 |
| Gykl1    | 0.0 | 0.0 | 0.0 | 0.0 | 0.0 | 0.0 | 0.0 | 0.0 | 0.0 | 0.0 | 0.0 | 0.0 |
| Gypa     | 0.0 | 0.0 | 0.0 | 0.0 | 0.0 | 0.0 | 0.0 | 0.0 | 0.0 | 0.0 | 0.0 | 0.0 |
| Gzmb     | 0.0 | 0.0 | 0.0 | 0.0 | 0.0 | 0.0 | 0.0 | 0.0 | 0.0 | 0.0 | 0.0 | 0.0 |
| Gzmd     | 0.0 | 0.0 | 0.0 | 0.0 | 0.0 | 0.0 | 0.0 | 0.0 | 0.0 | 0.0 | 0.1 | 0.0 |
| Gzmn     | 0.0 | 0.0 | 0.0 | 0.0 | 0.0 | 0.0 | 0.0 | 0.0 | 0.0 | 0.0 | 0.0 | 0.0 |
| H1foo    | 0.0 | 0.0 | 0.0 | 0.0 | 0.0 | 0.0 | 0.0 | 0.0 | 0.0 | 0.0 | 0.0 | 0.0 |
| H2-Eb2   | 0.0 | 0.0 | 0.0 | 0.0 | 0.0 | 0.0 | 0.0 | 0.0 | 0.0 | 0.0 | 0.0 | 0.0 |
| H2-M1    | 0.0 | 0.0 | 0.0 | 0.0 | 0.0 | 0.0 | 0.0 | 0.0 | 0.0 | 0.0 | 0.0 | 0.0 |
| H2-M10.1 | 0.0 | 0.0 | 0.0 | 0.1 | 0.0 | 0.0 | 0.0 | 0.0 | 0.0 | 0.0 | 0.0 | 0.0 |

Excluded Genes

|           |     |     |     |     |     |     |     |     |     |     |     |     |
|-----------|-----|-----|-----|-----|-----|-----|-----|-----|-----|-----|-----|-----|
| H2-M10.2  | 0.0 | 0.0 | 0.0 | 0.1 | 0.0 | 0.0 | 0.0 | 0.0 | 0.0 | 0.0 | 0.0 | 0.0 |
| H2-M10.3  | 0.0 | 0.0 | 0.0 | 0.0 | 0.0 | 0.0 | 0.0 | 0.0 | 0.0 | 0.0 | 0.0 | 0.0 |
| H2-M10.4  | 0.0 | 0.0 | 0.0 | 0.0 | 0.0 | 0.0 | 0.0 | 0.0 | 0.0 | 0.0 | 0.0 | 0.0 |
| H2-M10.5  | 0.0 | 0.0 | 0.0 | 0.0 | 0.0 | 0.0 | 0.0 | 0.0 | 0.0 | 0.0 | 0.0 | 0.0 |
| H2-M10.6  | 0.0 | 0.0 | 0.0 | 0.0 | 0.0 | 0.0 | 0.0 | 0.0 | 0.0 | 0.0 | 0.0 | 0.0 |
| H2-M11    | 0.0 | 0.0 | 0.0 | 0.0 | 0.0 | 0.0 | 0.0 | 0.0 | 0.0 | 0.0 | 0.0 | 0.0 |
| H2-M2     | 0.0 | 0.0 | 0.0 | 0.0 | 0.0 | 0.0 | 0.1 | 0.0 | 0.0 | 0.0 | 0.0 | 0.0 |
| H2-Oa     | 0.0 | 0.0 | 0.0 | 0.0 | 0.0 | 0.0 | 0.0 | 0.0 | 0.0 | 0.0 | 0.0 | 0.0 |
| H2-Ob     | 0.0 | 0.0 | 0.0 | 0.0 | 0.1 | 0.0 | 0.0 | 0.0 | 0.0 | 0.0 | 0.0 | 0.0 |
| Hamp      | 0.0 | 0.0 | 0.0 | 0.0 | 0.1 | 0.0 | 0.0 | 0.0 | 0.0 | 0.0 | 0.0 | 0.0 |
| Hand1     | 0.0 | 0.0 | 0.0 | 0.0 | 0.0 | 0.0 | 0.0 | 0.0 | 0.0 | 0.0 | 0.0 | 0.1 |
| Hao1      | 0.0 | 0.0 | 0.0 | 0.1 | 0.1 | 0.0 | 0.1 | 0.0 | 0.0 | 0.1 | 0.0 | 0.0 |
| Hapln2    | 0.0 | 0.0 | 0.0 | 0.0 | 0.0 | 0.0 | 0.0 | 0.0 | 0.0 | 0.0 | 0.0 | 0.0 |
| Havcr1    | 0.0 | 0.0 | 0.0 | 0.0 | 0.0 | 0.0 | 0.0 | 0.0 | 0.0 | 0.0 | 0.0 | 0.0 |
| Hba-a1    | 0.0 | 0.0 | 0.0 | 0.0 | 0.0 | 0.0 | 0.0 | 0.0 | 0.0 | 0.0 | 0.0 | 0.0 |
| Hba-a2    | 0.0 | 0.0 | 0.0 | 0.0 | 0.0 | 0.0 | 0.0 | 0.0 | 0.0 | 0.0 | 0.0 | 0.0 |
| Hcn4      | 0.0 | 0.0 | 0.0 | 0.0 | 0.0 | 0.0 | 0.0 | 0.0 | 0.0 | 0.1 | 0.0 | 0.0 |
| Hcrt      | 0.0 | 0.0 | 0.0 | 0.0 | 0.0 | 0.0 | 0.0 | 0.0 | 0.0 | 0.0 | 0.0 | 0.0 |
| Hcrr2     | 0.0 | 0.0 | 0.0 | 0.0 | 0.0 | 0.0 | 0.0 | 0.0 | 0.0 | 0.0 | 0.0 | 0.0 |
| Hdhd1a    | 0.0 | 0.0 | 0.0 | 0.1 | 0.0 | 0.0 | 0.0 | 0.0 | 0.0 | 0.0 | 0.0 | 0.0 |
| Hemgn     | 0.0 | 0.0 | 0.0 | 0.0 | 0.0 | 0.0 | 0.0 | 0.0 | 0.0 | 0.0 | 0.0 | 0.0 |
| Hemt1     | 0.0 | 0.0 | 0.0 | 0.0 | 0.1 | 0.1 | 0.0 | 0.0 | 0.0 | 0.0 | 0.0 | 0.0 |
| Hepacam2  | 0.0 | 0.0 | 0.0 | 0.0 | 0.0 | 0.0 | 0.0 | 0.0 | 0.0 | 0.0 | 0.0 | 0.0 |
| Hes2      | 0.0 | 0.0 | 0.0 | 0.0 | 0.0 | 0.0 | 0.0 | 0.0 | 0.0 | 0.0 | 0.0 | 0.0 |
| Hes5      | 0.0 | 0.0 | 0.0 | 0.0 | 0.0 | 0.0 | 0.0 | 0.0 | 0.0 | 0.0 | 0.0 | 0.0 |
| Hesx1     | 0.0 | 0.0 | 0.0 | 0.0 | 0.1 | 0.0 | 0.1 | 0.0 | 0.0 | 0.0 | 0.0 | 0.0 |
| Hfe2      | 0.0 | 0.0 | 0.0 | 0.1 | 0.0 | 0.0 | 0.0 | 0.0 | 0.0 | 0.0 | 0.0 | 0.0 |
| Hhip      | 0.0 | 0.0 | 0.0 | 0.0 | 0.0 | 0.0 | 0.0 | 0.0 | 0.0 | 0.0 | 0.0 | 0.0 |
| Higd1b    | 0.0 | 0.0 | 0.0 | 0.0 | 0.0 | 0.0 | 0.0 | 0.1 | 0.0 | 0.0 | 0.0 | 0.1 |
| Hist1h2aa | 0.0 | 0.0 | 0.0 | 0.0 | 0.1 | 0.0 | 0.0 | 0.1 | 0.0 | 0.0 | 0.0 | 0.0 |
| Hist3h2ba | 0.1 | 0.0 | 0.0 | 0.0 | 0.0 | 0.0 | 0.0 | 0.0 | 0.0 | 0.0 | 0.0 | 0.0 |
| Hkdc1     | 0.0 | 0.0 | 0.0 | 0.0 | 0.0 | 0.0 | 0.0 | 0.0 | 0.0 | 0.0 | 0.0 | 0.0 |
| Hmx1      | 0.0 | 0.0 | 0.0 | 0.0 | 0.0 | 0.0 | 0.0 | 0.0 | 0.0 | 0.0 | 0.0 | 0.0 |
| Hmx2      | 0.0 | 0.0 | 0.0 | 0.0 | 0.0 | 0.0 | 0.0 | 0.0 | 0.0 | 0.0 | 0.0 | 0.0 |
| Hnf1b     | 0.0 | 0.0 | 0.0 | 0.0 | 0.0 | 0.0 | 0.0 | 0.0 | 0.0 | 0.0 | 0.0 | 0.0 |
| Hormad1   | 0.0 | 0.0 | 0.0 | 0.0 | 0.0 | 0.0 | 0.0 | 0.0 | 0.0 | 0.0 | 0.0 | 0.0 |
| Hoxa11    | 0.0 | 0.0 | 0.0 | 0.0 | 0.0 | 0.0 | 0.0 | 0.0 | 0.0 | 0.0 | 0.0 | 0.0 |
| Hoxa11as  | 0.0 | 0.0 | 0.0 | 0.0 | 0.0 | 0.0 | 0.0 | 0.0 | 0.0 | 0.0 | 0.0 | 0.0 |
| Hoxa13    | 0.1 | 0.0 | 0.0 | 0.0 | 0.0 | 0.0 | 0.0 | 0.0 | 0.0 | 0.0 | 0.0 | 0.0 |
| Hoxa9     | 0.0 | 0.0 | 0.0 | 0.0 | 0.0 | 0.0 | 0.0 | 0.0 | 0.0 | 0.0 | 0.0 | 0.0 |
| Hoxc11    | 0.0 | 0.0 | 0.0 | 0.0 | 0.0 | 0.0 | 0.0 | 0.0 | 0.0 | 0.0 | 0.0 | 0.1 |
| Hoxc12    | 0.1 | 0.0 | 0.0 | 0.0 | 0.0 | 0.0 | 0.0 | 0.0 | 0.0 | 0.0 | 0.0 | 0.0 |
| Hoxd1     | 0.0 | 0.0 | 0.0 | 0.0 | 0.0 | 0.0 | 0.0 | 0.0 | 0.0 | 0.0 | 0.0 | 0.0 |
| Hoxd13    | 0.0 | 0.0 | 0.0 | 0.0 | 0.0 | 0.0 | 0.0 | 0.0 | 0.0 | 0.0 | 0.0 | 0.0 |
| Hpca      | 0.0 | 0.0 | 0.0 | 0.0 | 0.0 | 0.0 | 0.0 | 0.0 | 0.0 | 0.0 | 0.0 | 0.0 |
| Hpse2     | 0.0 | 0.0 | 0.0 | 0.0 | 0.0 | 0.0 | 0.0 | 0.0 | 0.0 | 0.0 | 0.0 | 0.0 |
| Hrasls5   | 0.1 | 0.0 | 0.0 | 0.0 | 0.0 | 0.0 | 0.0 | 0.0 | 0.0 | 0.0 | 0.0 | 0.0 |
| Hrh3      | 0.0 | 0.0 | 0.0 | 0.0 | 0.0 | 0.0 | 0.0 | 0.0 | 0.0 | 0.0 | 0.0 | 0.0 |
| Hs3st2    | 0.0 | 0.0 | 0.0 | 0.0 | 0.0 | 0.0 | 0.0 | 0.0 | 0.0 | 0.0 | 0.0 | 0.0 |
| Hs3st5    | 0.0 | 0.0 | 0.0 | 0.0 | 0.0 | 0.0 | 0.0 | 0.0 | 0.0 | 0.0 | 0.0 | 0.0 |
| Hsbp1l1   | 0.1 | 0.0 | 0.0 | 0.0 | 0.0 | 0.0 | 0.0 | 0.0 | 0.1 | 0.0 | 0.0 | 0.0 |
| Hsd17b14  | 0.0 | 0.0 | 0.1 | 0.0 | 0.0 | 0.0 | 0.0 | 0.0 | 0.0 | 0.0 | 0.1 | 0.0 |
| Hsd17b2   | 0.0 | 0.0 | 0.0 | 0.0 | 0.0 | 0.0 | 0.0 | 0.0 | 0.0 | 0.0 | 0.0 | 0.0 |
| Hsd17b3   | 0.0 | 0.0 | 0.0 | 0.0 | 0.0 | 0.0 | 0.0 | 0.0 | 0.0 | 0.0 | 0.0 | 0.0 |
| Hsd3b5    | 0.0 | 0.0 | 0.0 | 0.0 | 0.0 | 0.0 | 0.0 | 0.1 | 0.0 | 0.0 | 0.0 | 0.0 |
| Hsd3b6    | 0.0 | 0.0 | 0.0 | 0.0 | 0.0 | 0.0 | 0.0 | 0.0 | 0.0 | 0.0 | 0.0 | 0.0 |
| Hsh2d     | 0.0 | 0.0 | 0.0 | 0.0 | 0.0 | 0.0 | 0.0 | 0.0 | 0.0 | 0.0 | 0.0 | 0.0 |

Excluded Genes

|         |     |     |     |     |     |     |     |     |     |     |     |     |
|---------|-----|-----|-----|-----|-----|-----|-----|-----|-----|-----|-----|-----|
| Hspb3   | 0.0 | 0.1 | 0.0 | 0.0 | 0.0 | 0.2 | 0.0 | 0.0 | 0.0 | 0.0 | 0.0 | 0.0 |
| Htr1b   | 0.1 | 0.0 | 0.0 | 0.0 | 0.0 | 0.0 | 0.0 | 0.0 | 0.0 | 0.0 | 0.0 | 0.0 |
| Htr1f   | 0.0 | 0.0 | 0.0 | 0.0 | 0.0 | 0.0 | 0.0 | 0.0 | 0.0 | 0.0 | 0.0 | 0.0 |
| Htr2c   | 0.0 | 0.0 | 0.0 | 0.0 | 0.0 | 0.0 | 0.0 | 0.0 | 0.0 | 0.0 | 0.0 | 0.0 |
| Htr3a   | 0.0 | 0.0 | 0.0 | 0.0 | 0.0 | 0.0 | 0.0 | 0.0 | 0.0 | 0.0 | 0.0 | 0.0 |
| Htr3b   | 0.0 | 0.0 | 0.0 | 0.0 | 0.0 | 0.0 | 0.0 | 0.0 | 0.0 | 0.0 | 0.0 | 0.0 |
| Htr5a   | 0.0 | 0.0 | 0.0 | 0.0 | 0.0 | 0.0 | 0.0 | 0.0 | 0.0 | 0.0 | 0.0 | 0.0 |
| Htr6    | 0.0 | 0.0 | 0.0 | 0.0 | 0.0 | 0.0 | 0.0 | 0.0 | 0.0 | 0.0 | 0.0 | 0.0 |
| Hyal5   | 0.0 | 0.0 | 0.0 | 0.0 | 0.0 | 0.1 | 0.0 | 0.0 | 0.0 | 0.0 | 0.0 | 0.0 |
| Hyal6   | 0.0 | 0.0 | 0.0 | 0.0 | 0.0 | 0.0 | 0.0 | 0.0 | 0.0 | 0.0 | 0.0 | 0.0 |
| Iapp    | 0.0 | 0.0 | 0.0 | 0.0 | 0.1 | 0.0 | 0.0 | 0.0 | 0.0 | 0.0 | 0.0 | 0.0 |
| Ibsp    | 0.0 | 0.0 | 0.0 | 0.1 | 0.0 | 0.0 | 0.0 | 0.0 | 0.0 | 0.0 | 0.1 | 0.0 |
| Ifi202b | 0.0 | 0.0 | 0.0 | 0.0 | 0.0 | 0.0 | 0.0 | 0.0 | 0.0 | 0.0 | 0.0 | 0.0 |
| Ifi44l  | 0.0 | 0.0 | 0.0 | 0.0 | 0.0 | 0.0 | 0.0 | 0.0 | 0.0 | 0.0 | 0.0 | 0.0 |
| Iftm6   | 0.2 | 0.0 | 0.1 | 1.0 | 1.0 | 0.0 | 0.0 | 0.0 | 0.0 | 0.2 | 0.0 | 0.0 |
| Iftd1   | 0.0 | 0.0 | 0.0 | 0.0 | 0.0 | 0.0 | 0.0 | 0.0 | 0.0 | 0.0 | 0.0 | 0.0 |
| Ifna13  | 0.2 | 0.0 | 0.0 | 0.0 | 0.0 | 0.1 | 0.0 | 0.0 | 0.0 | 0.0 | 0.0 | 0.0 |
| Ifna6   | 0.0 | 0.0 | 0.0 | 0.0 | 0.0 | 0.0 | 0.0 | 0.0 | 0.0 | 0.0 | 0.0 | 0.0 |
| Ifnab   | 0.0 | 0.0 | 0.0 | 0.0 | 0.0 | 0.0 | 0.0 | 0.0 | 0.0 | 0.0 | 0.0 | 0.3 |
| Ifnb1   | 0.0 | 0.0 | 0.0 | 0.0 | 0.0 | 0.5 | 0.0 | 0.0 | 0.0 | 0.1 | 0.0 | 0.1 |
| Ifne    | 0.0 | 0.0 | 0.0 | 0.0 | 0.0 | 0.0 | 0.0 | 0.0 | 0.0 | 0.0 | 0.0 | 0.0 |
| Ifng    | 0.0 | 0.0 | 0.0 | 0.0 | 0.0 | 0.0 | 0.0 | 0.0 | 0.0 | 0.0 | 0.0 | 0.0 |
| Ifnk    | 0.0 | 0.0 | 0.0 | 0.0 | 0.0 | 0.0 | 0.0 | 0.0 | 0.0 | 0.0 | 0.0 | 0.0 |
| Igf2as  | 0.0 | 0.0 | 0.0 | 0.0 | 0.0 | 0.0 | 0.0 | 0.0 | 0.0 | 0.0 | 0.0 | 0.0 |
| Igfbp1  | 0.0 | 0.0 | 0.0 | 0.1 | 0.0 | 0.0 | 0.0 | 0.0 | 0.0 | 0.0 | 0.0 | 0.0 |
| Igj     | 0.0 | 0.0 | 0.0 | 0.0 | 0.0 | 0.0 | 0.0 | 0.0 | 0.0 | 0.0 | 0.0 | 0.0 |
| Igl1    | 0.0 | 0.0 | 0.0 | 0.0 | 0.0 | 0.0 | 0.0 | 0.0 | 0.0 | 0.0 | 0.2 | 0.0 |
| Igsf1   | 0.0 | 0.0 | 0.0 | 0.0 | 0.0 | 0.1 | 0.0 | 0.0 | 0.0 | 0.0 | 0.0 | 0.0 |
| Igsf5   | 0.0 | 0.0 | 0.0 | 0.0 | 0.0 | 0.0 | 0.0 | 0.0 | 0.0 | 0.0 | 0.0 | 0.0 |
| Ihh     | 0.0 | 0.0 | 0.0 | 0.0 | 0.0 | 0.0 | 0.0 | 0.0 | 0.0 | 0.0 | 0.0 | 0.0 |
| Ikzf3   | 0.0 | 0.0 | 0.0 | 0.0 | 0.0 | 0.0 | 0.0 | 0.0 | 0.0 | 0.0 | 0.0 | 0.0 |
| Il12b   | 0.0 | 0.0 | 0.0 | 0.0 | 0.0 | 0.0 | 0.0 | 0.0 | 0.0 | 0.0 | 0.0 | 0.0 |
| Il17a   | 0.0 | 0.0 | 0.0 | 0.0 | 0.1 | 0.0 | 0.0 | 0.0 | 0.0 | 0.0 | 0.0 | 0.0 |
| Il19    | 0.1 | 0.2 | 0.0 | 0.0 | 0.0 | 0.1 | 0.0 | 0.0 | 0.0 | 0.0 | 0.0 | 0.0 |
| Il1f5   | 0.0 | 0.0 | 0.0 | 0.0 | 0.0 | 0.0 | 0.0 | 0.0 | 0.0 | 0.0 | 0.0 | 0.0 |
| Il1f8   | 0.0 | 0.0 | 0.0 | 0.0 | 0.0 | 0.1 | 0.0 | 0.0 | 0.0 | 0.0 | 0.0 | 0.0 |
| Il21    | 0.0 | 0.0 | 0.0 | 0.0 | 0.0 | 0.0 | 0.0 | 0.0 | 0.0 | 0.0 | 0.0 | 0.0 |
| Il24    | 0.0 | 0.0 | 0.0 | 0.2 | 0.0 | 0.0 | 0.0 | 0.0 | 0.0 | 0.0 | 0.0 | 0.0 |
| Il25    | 0.0 | 0.0 | 0.0 | 0.0 | 0.0 | 0.0 | 0.0 | 0.0 | 0.0 | 0.0 | 0.1 | 0.0 |
| Il27    | 0.0 | 0.0 | 0.0 | 0.0 | 0.1 | 0.0 | 0.0 | 0.1 | 0.0 | 0.0 | 0.0 | 0.0 |
| Il31    | 0.0 | 0.0 | 0.0 | 0.0 | 0.0 | 0.0 | 0.0 | 0.0 | 0.0 | 0.0 | 0.0 | 0.0 |
| Il4     | 0.0 | 0.0 | 0.1 | 0.0 | 0.0 | 0.2 | 0.0 | 0.2 | 0.0 | 0.0 | 0.0 | 0.0 |
| Il5     | 0.0 | 0.1 | 0.0 | 0.0 | 0.0 | 0.0 | 0.0 | 0.0 | 0.0 | 0.1 | 0.1 | 0.0 |
| Il9r    | 0.0 | 0.0 | 0.0 | 0.0 | 0.0 | 0.0 | 0.0 | 0.0 | 0.0 | 0.0 | 0.0 | 0.0 |
| Illdr1  | 0.0 | 0.0 | 0.0 | 0.0 | 0.0 | 0.0 | 0.0 | 0.0 | 0.0 | 0.0 | 0.0 | 0.0 |
| Iltifb  | 0.0 | 0.0 | 0.0 | 0.0 | 0.0 | 0.0 | 0.0 | 0.0 | 0.0 | 0.0 | 0.0 | 0.0 |
| Inhbc   | 0.1 | 0.0 | 0.0 | 0.0 | 0.0 | 0.0 | 0.0 | 0.0 | 0.0 | 0.0 | 0.0 | 0.0 |
| Inhbe   | 0.0 | 0.0 | 0.0 | 0.0 | 0.0 | 0.0 | 0.0 | 0.0 | 0.0 | 0.0 | 0.0 | 0.0 |
| Insl5   | 0.0 | 0.1 | 0.0 | 0.0 | 0.0 | 0.0 | 0.1 | 0.0 | 0.0 | 0.0 | 0.0 | 0.0 |
| Ipcef1  | 0.0 | 0.0 | 0.0 | 0.0 | 0.0 | 0.0 | 0.0 | 0.0 | 0.0 | 0.0 | 0.0 | 0.0 |
| Iqca    | 0.0 | 0.0 | 0.0 | 0.0 | 0.0 | 0.0 | 0.0 | 0.0 | 0.0 | 0.0 | 0.0 | 0.0 |
| Iqcf5   | 0.0 | 0.0 | 0.0 | 0.0 | 0.0 | 0.3 | 0.0 | 0.0 | 0.0 | 0.0 | 0.0 | 0.0 |
| Iqcj    | 0.0 | 0.0 | 0.0 | 0.0 | 0.0 | 0.0 | 0.0 | 0.0 | 0.0 | 0.0 | 0.0 | 0.0 |
| Iqsec3  | 0.0 | 0.0 | 0.0 | 0.0 | 0.0 | 0.0 | 0.0 | 0.0 | 0.0 | 0.0 | 0.0 | 0.0 |
| Irgc1   | 0.0 | 0.0 | 0.0 | 0.0 | 0.0 | 0.0 | 0.0 | 0.0 | 0.0 | 0.0 | 0.0 | 0.0 |
| Irx4    | 0.0 | 0.0 | 0.0 | 0.0 | 0.0 | 0.0 | 0.0 | 0.0 | 0.0 | 0.0 | 0.0 | 0.0 |
| Irx6    | 0.0 | 0.0 | 0.0 | 0.0 | 0.0 | 0.0 | 0.0 | 0.0 | 0.0 | 0.0 | 0.0 | 0.0 |

Excluded Genes

|           |     |     |     |     |     |     |     |     |     |     |     |     |
|-----------|-----|-----|-----|-----|-----|-----|-----|-----|-----|-----|-----|-----|
| Itk       | 0.0 | 0.0 | 0.0 | 0.0 | 0.0 | 0.0 | 0.0 | 0.0 | 0.0 | 0.0 | 0.0 | 0.0 |
| Itln1     | 0.0 | 0.0 | 0.1 | 0.0 | 0.0 | 0.0 | 0.0 | 0.0 | 0.0 | 0.0 | 0.0 | 0.0 |
| Izumo1    | 0.0 | 0.1 | 0.0 | 0.1 | 0.0 | 0.1 | 0.0 | 0.0 | 0.0 | 0.0 | 0.0 | 0.0 |
| Kbitbd13  | 0.0 | 0.0 | 0.0 | 0.0 | 0.0 | 0.0 | 0.0 | 0.0 | 0.0 | 0.0 | 0.0 | 0.0 |
| Kcna7     | 0.0 | 0.0 | 0.0 | 0.1 | 0.0 | 0.0 | 0.0 | 0.0 | 0.0 | 0.1 | 0.0 | 0.0 |
| Kcnb2     | 0.0 | 0.0 | 0.0 | 0.0 | 0.0 | 0.0 | 0.0 | 0.0 | 0.0 | 0.0 | 0.0 | 0.0 |
| Kcnc1     | 0.0 | 0.0 | 0.0 | 0.0 | 0.0 | 0.0 | 0.0 | 0.0 | 0.0 | 0.0 | 0.0 | 0.0 |
| Kcnc4     | 0.0 | 0.0 | 0.0 | 0.0 | 0.0 | 0.0 | 0.0 | 0.0 | 0.0 | 0.0 | 0.0 | 0.0 |
| Kcng1     | 0.0 | 0.0 | 0.0 | 0.0 | 0.0 | 0.0 | 0.0 | 0.0 | 0.0 | 0.0 | 0.0 | 0.0 |
| Kcng3     | 0.0 | 0.0 | 0.0 | 0.0 | 0.0 | 0.0 | 0.0 | 0.0 | 0.0 | 0.0 | 0.0 | 0.0 |
| Kcnh6     | 0.0 | 0.0 | 0.0 | 0.0 | 0.0 | 0.0 | 0.0 | 0.0 | 0.0 | 0.0 | 0.0 | 0.0 |
| Kcnh7     | 0.0 | 0.0 | 0.0 | 0.0 | 0.0 | 0.0 | 0.0 | 0.0 | 0.0 | 0.0 | 0.0 | 0.0 |
| Kcnh8     | 0.0 | 0.0 | 0.0 | 0.0 | 0.0 | 0.0 | 0.0 | 0.0 | 0.0 | 0.0 | 0.0 | 0.0 |
| Kcnj1     | 0.0 | 0.0 | 0.0 | 0.1 | 0.0 | 0.0 | 0.0 | 0.0 | 0.0 | 0.0 | 0.0 | 0.0 |
| Kcnj16    | 0.0 | 0.0 | 0.0 | 0.0 | 0.0 | 0.0 | 0.0 | 0.0 | 0.0 | 0.0 | 0.0 | 0.0 |
| Kcnj3     | 0.0 | 0.0 | 0.0 | 0.0 | 0.0 | 0.0 | 0.0 | 0.0 | 0.0 | 0.0 | 0.0 | 0.0 |
| Kcnk10    | 0.0 | 0.0 | 0.0 | 0.1 | 0.0 | 0.0 | 0.0 | 0.0 | 0.0 | 0.0 | 0.0 | 0.0 |
| Kcnk16    | 0.0 | 0.0 | 0.0 | 0.0 | 0.0 | 0.0 | 0.0 | 0.0 | 0.0 | 0.0 | 0.0 | 0.0 |
| Kcnk18    | 0.0 | 0.0 | 0.0 | 0.0 | 0.0 | 0.0 | 0.0 | 0.0 | 0.0 | 0.0 | 0.0 | 0.0 |
| Kcnk3     | 0.0 | 0.0 | 0.0 | 0.0 | 0.0 | 0.0 | 0.0 | 0.0 | 0.0 | 0.0 | 0.0 | 0.0 |
| Kcnk4     | 0.0 | 0.0 | 0.1 | 0.1 | 0.0 | 0.0 | 0.0 | 0.0 | 0.0 | 0.0 | 0.0 | 0.0 |
| Kcnk9     | 0.0 | 0.0 | 0.0 | 0.0 | 0.0 | 0.0 | 0.0 | 0.0 | 0.0 | 0.0 | 0.0 | 0.0 |
| Kcnmb2    | 0.0 | 0.0 | 0.0 | 0.0 | 0.0 | 0.0 | 0.0 | 0.0 | 0.0 | 0.0 | 0.0 | 0.0 |
| Kcnq2     | 0.0 | 0.0 | 0.0 | 0.0 | 0.0 | 0.0 | 0.0 | 0.0 | 0.0 | 0.0 | 0.0 | 0.0 |
| Kcns2     | 0.0 | 0.0 | 0.0 | 0.0 | 0.0 | 0.0 | 0.0 | 0.0 | 0.0 | 0.0 | 0.0 | 0.0 |
| Kcnv1     | 0.0 | 0.0 | 0.0 | 0.0 | 0.0 | 0.0 | 0.0 | 0.0 | 0.0 | 0.0 | 0.0 | 0.0 |
| Kctd19    | 0.0 | 0.0 | 0.0 | 0.0 | 0.0 | 0.0 | 0.0 | 0.0 | 0.0 | 0.0 | 0.0 | 0.0 |
| Keg1      | 0.1 | 0.0 | 0.0 | 0.0 | 0.0 | 0.0 | 0.0 | 0.0 | 0.0 | 0.0 | 0.0 | 0.0 |
| Khdrbs2   | 0.0 | 0.0 | 0.0 | 0.0 | 0.0 | 0.0 | 0.0 | 0.0 | 0.0 | 0.0 | 0.0 | 0.0 |
| Kif12     | 0.0 | 0.0 | 0.0 | 0.0 | 0.0 | 0.0 | 0.0 | 0.0 | 0.0 | 0.0 | 0.0 | 0.0 |
| Kirrel2   | 0.0 | 0.0 | 0.0 | 0.0 | 0.0 | 0.0 | 0.0 | 0.0 | 0.0 | 0.0 | 0.0 | 0.0 |
| Kl        | 0.0 | 0.0 | 0.0 | 0.0 | 0.0 | 0.0 | 0.0 | 0.0 | 0.0 | 0.0 | 0.0 | 0.0 |
| Klhl1     | 0.0 | 0.0 | 0.0 | 0.0 | 0.0 | 0.0 | 0.0 | 0.0 | 0.0 | 0.0 | 0.0 | 0.0 |
| Klhl14    | 0.0 | 0.0 | 0.0 | 0.0 | 0.0 | 0.0 | 0.0 | 0.0 | 0.0 | 0.0 | 0.0 | 0.0 |
| Klhl40    | 0.0 | 0.0 | 0.0 | 0.0 | 0.0 | 0.0 | 0.0 | 0.0 | 0.0 | 0.0 | 0.0 | 0.0 |
| Klk14     | 0.0 | 0.0 | 0.0 | 0.0 | 0.0 | 0.0 | 0.0 | 0.0 | 0.0 | 0.0 | 0.0 | 0.0 |
| Klk1b27   | 0.0 | 0.0 | 0.0 | 0.0 | 0.0 | 0.1 | 0.0 | 0.0 | 0.0 | 0.0 | 0.0 | 0.0 |
| Klk6      | 0.0 | 0.0 | 0.0 | 0.0 | 0.0 | 0.0 | 0.0 | 0.0 | 0.0 | 0.0 | 0.0 | 0.0 |
| Klk7      | 0.0 | 0.0 | 0.0 | 0.0 | 0.0 | 0.0 | 0.0 | 0.0 | 0.0 | 0.0 | 0.0 | 0.0 |
| Klk9      | 0.0 | 0.0 | 0.0 | 0.0 | 0.0 | 0.0 | 0.0 | 0.0 | 0.0 | 0.0 | 0.0 | 0.0 |
| Klra1     | 0.0 | 0.0 | 0.0 | 0.0 | 0.0 | 0.0 | 0.0 | 0.0 | 0.0 | 0.0 | 0.0 | 0.0 |
| Klra12    | 0.0 | 0.0 | 0.0 | 0.0 | 0.0 | 0.0 | 0.0 | 0.0 | 0.0 | 0.0 | 0.0 | 0.0 |
| Klra15    | 0.0 | 0.0 | 0.0 | 0.0 | 0.0 | 0.0 | 0.0 | 0.0 | 0.0 | 0.0 | 0.0 | 0.0 |
| Klra17    | 0.0 | 0.0 | 0.0 | 0.0 | 0.0 | 0.0 | 0.0 | 0.0 | 0.0 | 0.0 | 0.0 | 0.0 |
| Klra3     | 0.0 | 0.0 | 0.0 | 0.0 | 0.0 | 0.0 | 0.0 | 0.0 | 0.0 | 0.0 | 0.0 | 0.0 |
| Klra7     | 0.0 | 0.0 | 0.0 | 0.0 | 0.0 | 0.0 | 0.0 | 0.0 | 0.0 | 0.0 | 0.0 | 0.0 |
| Klrb1a    | 0.1 | 0.0 | 0.0 | 0.0 | 0.0 | 0.0 | 0.0 | 0.0 | 0.0 | 0.0 | 0.0 | 0.0 |
| Klrb1-ps1 | 0.0 | 0.0 | 0.1 | 0.1 | 0.1 | 0.0 | 0.0 | 0.1 | 0.0 | 0.0 | 0.1 | 0.0 |
| Klre1     | 0.0 | 0.0 | 0.0 | 0.1 | 0.0 | 0.0 | 0.0 | 0.0 | 0.1 | 0.0 | 0.0 | 0.1 |
| Klri2     | 0.0 | 0.0 | 0.0 | 0.0 | 0.0 | 0.0 | 0.0 | 0.0 | 0.0 | 0.0 | 0.0 | 0.0 |
| Klrk1     | 0.0 | 0.0 | 0.0 | 0.0 | 0.0 | 0.0 | 0.0 | 0.0 | 0.0 | 0.0 | 0.0 | 0.0 |
| Kncn      | 0.0 | 0.0 | 0.0 | 0.0 | 0.0 | 0.0 | 0.0 | 0.0 | 0.0 | 0.0 | 0.0 | 0.0 |
| Kppp      | 0.0 | 0.0 | 0.0 | 0.1 | 0.0 | 0.0 | 0.0 | 0.0 | 0.0 | 0.0 | 0.0 | 0.0 |
| Kremen2   | 0.0 | 0.0 | 0.0 | 0.0 | 0.0 | 0.0 | 0.0 | 0.0 | 0.0 | 0.0 | 0.0 | 0.0 |
| Krt1      | 0.0 | 0.0 | 0.0 | 0.0 | 0.0 | 0.0 | 0.0 | 0.0 | 0.0 | 0.0 | 0.0 | 0.0 |
| Krt12     | 0.0 | 0.0 | 0.0 | 0.0 | 0.0 | 0.0 | 0.0 | 0.0 | 0.0 | 0.0 | 0.0 | 0.0 |
| Krt13     | 0.1 | 0.0 | 0.1 | 0.1 | 0.1 | 0.0 | 0.0 | 0.0 | 0.0 | 0.0 | 0.0 | 0.0 |

Excluded Genes

|           |     |     |     |     |     |     |     |     |     |     |     |     |
|-----------|-----|-----|-----|-----|-----|-----|-----|-----|-----|-----|-----|-----|
| Krt15     | 0.0 | 0.0 | 0.0 | 0.0 | 0.0 | 0.0 | 0.0 | 0.0 | 0.0 | 0.0 | 0.0 | 0.0 |
| Krt16     | 0.0 | 0.0 | 0.0 | 0.0 | 0.0 | 0.0 | 0.0 | 0.0 | 0.0 | 0.0 | 0.0 | 0.0 |
| Krt25     | 0.0 | 0.0 | 0.0 | 0.0 | 0.0 | 0.0 | 0.0 | 0.0 | 0.0 | 0.0 | 0.0 | 0.0 |
| Krt28     | 0.0 | 0.0 | 0.0 | 0.0 | 0.0 | 0.0 | 0.0 | 0.0 | 0.0 | 0.0 | 0.0 | 0.0 |
| Krt31     | 0.0 | 0.0 | 0.0 | 0.0 | 0.0 | 0.0 | 0.0 | 0.0 | 0.0 | 0.0 | 0.0 | 0.0 |
| Krt32     | 0.0 | 0.0 | 0.0 | 0.1 | 0.0 | 0.0 | 0.0 | 0.0 | 0.0 | 0.0 | 0.0 | 0.0 |
| Krt33a    | 0.1 | 0.0 | 0.0 | 0.0 | 0.0 | 0.0 | 0.0 | 0.0 | 0.0 | 0.0 | 0.0 | 0.0 |
| Krt36     | 0.0 | 0.0 | 0.0 | 0.0 | 0.0 | 0.0 | 0.0 | 0.0 | 0.0 | 0.0 | 0.0 | 0.0 |
| Krt4      | 0.0 | 0.0 | 0.0 | 0.0 | 0.0 | 0.0 | 0.0 | 0.0 | 0.0 | 0.0 | 0.0 | 0.0 |
| Krt6a     | 0.0 | 0.0 | 0.0 | 0.0 | 0.0 | 0.0 | 0.0 | 0.0 | 0.0 | 0.0 | 0.0 | 0.0 |
| Krt6b     | 0.0 | 0.0 | 0.0 | 0.0 | 0.0 | 0.0 | 0.0 | 0.0 | 0.0 | 0.0 | 0.0 | 0.0 |
| Krt71     | 0.0 | 0.0 | 0.0 | 0.0 | 0.0 | 0.0 | 0.0 | 0.0 | 0.0 | 0.0 | 0.0 | 0.0 |
| Krt72     | 0.0 | 0.0 | 0.0 | 0.0 | 0.0 | 0.0 | 0.0 | 0.0 | 0.0 | 0.0 | 0.0 | 0.0 |
| Krt73     | 0.0 | 0.0 | 0.0 | 0.0 | 0.0 | 0.0 | 0.0 | 0.0 | 0.0 | 0.0 | 0.0 | 0.0 |
| Krt74     | 0.0 | 0.0 | 0.0 | 0.0 | 0.0 | 0.0 | 0.0 | 0.0 | 0.0 | 0.0 | 0.0 | 0.0 |
| Krt75     | 0.0 | 0.0 | 0.0 | 0.0 | 0.0 | 0.0 | 0.0 | 0.0 | 0.0 | 0.0 | 0.0 | 0.0 |
| Krt76     | 0.0 | 0.0 | 0.0 | 0.0 | 0.0 | 0.0 | 0.0 | 0.0 | 0.0 | 0.0 | 0.0 | 0.0 |
| Krt79     | 0.0 | 0.0 | 0.0 | 0.0 | 0.0 | 0.0 | 0.0 | 0.0 | 0.0 | 0.0 | 0.0 | 0.0 |
| Krt81     | 0.0 | 0.0 | 0.0 | 0.0 | 0.0 | 0.0 | 0.0 | 0.0 | 0.0 | 0.0 | 0.0 | 0.0 |
| Krt83     | 0.0 | 0.0 | 0.0 | 0.0 | 0.0 | 0.0 | 0.0 | 0.0 | 0.0 | 0.0 | 0.0 | 0.0 |
| Krt85     | 0.0 | 0.0 | 0.0 | 0.0 | 0.0 | 0.0 | 0.0 | 0.0 | 0.0 | 0.0 | 0.0 | 0.0 |
| Krt86     | 0.0 | 0.0 | 0.0 | 0.0 | 0.0 | 0.0 | 0.0 | 0.0 | 0.0 | 0.0 | 0.0 | 0.0 |
| Krt9      | 0.0 | 0.0 | 0.0 | 0.0 | 0.0 | 0.0 | 0.0 | 0.0 | 0.0 | 0.0 | 0.0 | 0.0 |
| Krtap11-1 | 0.0 | 0.0 | 0.0 | 0.0 | 0.0 | 0.0 | 0.0 | 0.0 | 0.0 | 0.0 | 0.0 | 0.0 |
| Krtap1-5  | 0.0 | 0.0 | 0.0 | 0.1 | 0.0 | 0.0 | 0.0 | 0.0 | 0.0 | 0.0 | 0.0 | 0.0 |
| Krtap17-1 | 0.0 | 0.1 | 0.0 | 0.0 | 0.0 | 0.0 | 0.0 | 0.0 | 0.0 | 0.0 | 0.0 | 0.0 |
| Krtap2-4  | 0.0 | 0.0 | 0.0 | 0.0 | 0.0 | 0.0 | 0.0 | 0.0 | 0.0 | 0.0 | 0.0 | 0.0 |
| Krtap9-5  | 0.0 | 0.0 | 0.0 | 0.0 | 0.0 | 0.0 | 0.0 | 0.0 | 0.0 | 0.0 | 0.0 | 0.0 |
| Ky        | 0.0 | 0.0 | 0.0 | 0.0 | 0.0 | 0.0 | 0.0 | 0.0 | 0.0 | 0.0 | 0.0 | 0.0 |
| L1td1     | 0.0 | 0.0 | 0.0 | 0.0 | 0.0 | 0.0 | 0.0 | 0.0 | 0.0 | 0.0 | 0.0 | 0.0 |
| L3mbtl4   | 0.0 | 0.0 | 0.0 | 0.0 | 0.0 | 0.0 | 0.0 | 0.0 | 0.0 | 0.0 | 0.0 | 0.0 |
| L3mbtl4   | 0.0 | 0.0 | 0.0 | 0.0 | 0.0 | 0.0 | 0.0 | 0.0 | 0.0 | 0.0 | 0.0 | 0.0 |
| Lad1      | 0.0 | 0.0 | 0.0 | 0.0 | 0.0 | 0.0 | 0.1 | 0.0 | 0.0 | 0.0 | 0.0 | 0.0 |
| Lao1      | 0.0 | 0.0 | 0.0 | 0.0 | 0.0 | 0.0 | 0.0 | 0.0 | 0.0 | 0.0 | 0.0 | 0.0 |
| Lce1a1    | 0.0 | 0.0 | 0.0 | 0.0 | 0.1 | 0.0 | 0.0 | 0.0 | 0.0 | 0.0 | 0.0 | 0.0 |
| Lce1a2    | 0.0 | 0.0 | 0.0 | 0.0 | 0.0 | 0.0 | 0.0 | 0.0 | 0.0 | 0.0 | 0.0 | 0.0 |
| Lce1c     | 0.0 | 0.0 | 0.0 | 0.0 | 0.0 | 0.0 | 0.0 | 0.0 | 0.0 | 0.0 | 0.0 | 0.0 |
| Lce1e     | 0.0 | 0.0 | 0.0 | 0.0 | 0.0 | 0.0 | 0.0 | 0.0 | 0.0 | 0.0 | 0.0 | 0.0 |
| Lce1f     | 0.1 | 0.0 | 0.0 | 0.0 | 0.0 | 0.0 | 0.0 | 0.0 | 0.0 | 0.0 | 0.0 | 0.0 |
| Lce1i     | 0.0 | 0.0 | 0.0 | 0.0 | 0.0 | 0.0 | 0.0 | 0.0 | 0.0 | 0.0 | 0.0 | 0.0 |
| Lce6a     | 0.0 | 0.0 | 0.0 | 0.0 | 0.0 | 0.0 | 0.0 | 0.0 | 0.0 | 0.0 | 0.0 | 0.0 |
| Lcn8      | 0.0 | 0.0 | 0.0 | 0.0 | 0.0 | 0.0 | 0.0 | 0.0 | 0.0 | 0.0 | 0.0 | 0.0 |
| Ldhc      | 0.0 | 0.0 | 0.0 | 0.0 | 0.0 | 0.0 | 0.0 | 0.0 | 0.0 | 0.0 | 0.0 | 0.0 |
| Lect1     | 0.0 | 0.0 | 0.1 | 0.0 | 0.0 | 0.0 | 0.0 | 0.0 | 0.0 | 0.0 | 0.0 | 0.0 |
| Lect2     | 0.0 | 0.1 | 0.0 | 0.1 | 0.0 | 0.0 | 0.1 | 0.0 | 0.0 | 0.0 | 0.0 | 0.1 |
| Lgals12   | 0.0 | 0.0 | 0.0 | 0.0 | 0.0 | 0.0 | 0.0 | 0.0 | 0.0 | 0.0 | 0.0 | 0.0 |
| Lgsn      | 0.0 | 0.0 | 0.0 | 0.0 | 0.0 | 0.0 | 0.0 | 0.0 | 0.0 | 0.0 | 0.0 | 0.0 |
| Lhb       | 0.0 | 0.0 | 0.0 | 0.0 | 0.0 | 0.0 | 0.0 | 0.0 | 0.3 | 0.0 | 0.0 | 0.0 |
| Lhcgr     | 0.0 | 0.0 | 0.0 | 0.0 | 0.0 | 0.0 | 0.0 | 0.0 | 0.0 | 0.0 | 0.0 | 0.0 |
| Lhfpl5    | 0.0 | 0.0 | 0.0 | 0.0 | 0.0 | 0.0 | 0.0 | 0.0 | 0.1 | 0.0 | 0.0 | 0.0 |
| Lhx1      | 0.0 | 0.0 | 0.0 | 0.0 | 0.0 | 0.0 | 0.0 | 0.0 | 0.0 | 0.0 | 0.0 | 0.0 |
| Lhx3      | 0.0 | 0.0 | 0.0 | 0.0 | 0.0 | 0.0 | 0.0 | 0.0 | 0.0 | 0.0 | 0.0 | 0.0 |
| Lin28a    | 0.0 | 0.0 | 0.0 | 0.0 | 0.0 | 0.0 | 0.0 | 0.0 | 0.0 | 0.0 | 0.0 | 0.0 |
| Lin28b    | 0.0 | 0.0 | 0.0 | 0.0 | 0.0 | 0.0 | 0.0 | 0.0 | 0.0 | 0.0 | 0.0 | 0.0 |
| Lingo2    | 0.0 | 0.0 | 0.0 | 0.0 | 0.0 | 0.0 | 0.0 | 0.0 | 0.0 | 0.0 | 0.0 | 0.0 |
| Lingo3    | 0.0 | 0.0 | 0.0 | 0.0 | 0.0 | 0.0 | 0.0 | 0.0 | 0.0 | 0.0 | 0.0 | 0.0 |
| Lipf      | 0.0 | 0.0 | 0.0 | 0.0 | 0.0 | 0.0 | 0.0 | 0.0 | 0.0 | 0.0 | 0.0 | 0.0 |

Excluded Genes

|              |     |     |     |     |     |     |     |     |     |     |     |     |
|--------------|-----|-----|-----|-----|-----|-----|-----|-----|-----|-----|-----|-----|
| Lipi         | 0.0 | 0.0 | 0.0 | 0.0 | 0.0 | 0.0 | 0.0 | 0.0 | 0.0 | 0.0 | 0.0 | 0.0 |
| Lipk         | 0.0 | 0.0 | 0.0 | 0.0 | 0.0 | 0.0 | 0.0 | 0.0 | 0.0 | 0.0 | 0.1 | 0.0 |
| Lipm         | 0.0 | 0.0 | 0.0 | 0.0 | 0.0 | 0.0 | 0.0 | 0.0 | 0.0 | 0.0 | 0.0 | 0.0 |
| Lmo3         | 0.0 | 0.0 | 0.0 | 0.0 | 0.0 | 0.0 | 0.0 | 0.0 | 0.0 | 0.0 | 0.0 | 0.0 |
| Lmx1a        | 0.0 | 0.0 | 0.0 | 0.0 | 0.0 | 0.0 | 0.0 | 0.0 | 0.0 | 0.0 | 0.0 | 0.0 |
| LOC100040786 | 0.0 | 0.0 | 0.0 | 0.0 | 0.0 | 0.0 | 0.0 | 0.0 | 0.0 | 0.0 | 0.0 | 0.0 |
| LOC100048884 | 0.0 | 0.0 | 0.0 | 0.0 | 0.0 | 0.0 | 0.0 | 0.0 | 0.0 | 0.0 | 0.0 | 0.0 |
| LOC100502924 | 0.0 | 0.0 | 0.0 | 0.0 | 0.0 | 0.0 | 0.0 | 0.0 | 0.0 | 0.0 | 0.0 | 0.0 |
| LOC100503280 | 0.0 | 0.0 | 0.0 | 0.0 | 0.0 | 0.0 | 0.0 | 0.0 | 0.0 | 0.0 | 0.0 | 0.0 |
| Loxhd1       | 0.0 | 0.0 | 0.0 | 0.0 | 0.0 | 0.0 | 0.0 | 0.0 | 0.0 | 0.0 | 0.0 | 0.0 |
| Lpcat2b      | 0.0 | 0.0 | 0.0 | 0.0 | 0.0 | 0.0 | 0.0 | 0.0 | 0.0 | 0.0 | 0.0 | 0.0 |
| Lpo          | 0.0 | 0.0 | 0.0 | 0.0 | 0.0 | 0.0 | 0.0 | 0.0 | 0.0 | 0.0 | 0.0 | 0.0 |
| Lrcol1       | 0.0 | 0.0 | 0.0 | 0.0 | 0.0 | 0.0 | 0.0 | 0.1 | 0.0 | 0.0 | 0.0 | 0.0 |
| Lrfn2        | 0.0 | 0.0 | 0.0 | 0.0 | 0.0 | 0.0 | 0.0 | 0.0 | 0.0 | 0.0 | 0.0 | 0.0 |
| Lrfn5        | 0.0 | 0.0 | 0.0 | 0.0 | 0.0 | 0.0 | 0.0 | 0.0 | 0.0 | 0.0 | 0.0 | 0.0 |
| Lrit1        | 0.0 | 0.0 | 0.0 | 0.0 | 0.0 | 0.0 | 0.0 | 0.0 | 0.0 | 0.0 | 0.0 | 0.0 |
| Lrit3        | 0.0 | 0.0 | 0.0 | 0.0 | 0.0 | 0.0 | 0.0 | 0.0 | 0.0 | 0.0 | 0.0 | 0.0 |
| Lrrc10       | 0.0 | 0.0 | 0.0 | 0.1 | 0.1 | 0.0 | 0.0 | 0.0 | 0.0 | 0.0 | 0.0 | 0.0 |
| Lrrc30       | 0.0 | 0.0 | 0.0 | 0.0 | 0.0 | 0.0 | 0.0 | 0.0 | 0.0 | 0.0 | 0.0 | 0.0 |
| Lrrc38       | 0.0 | 0.0 | 0.0 | 0.0 | 0.0 | 0.0 | 0.0 | 0.0 | 0.0 | 0.0 | 0.0 | 0.0 |
| Lrrc3b       | 0.1 | 0.0 | 0.0 | 0.1 | 0.0 | 0.0 | 0.0 | 0.0 | 0.0 | 0.0 | 0.0 | 0.1 |
| Lrrc43       | 0.0 | 0.0 | 0.0 | 0.0 | 0.0 | 0.0 | 0.0 | 0.0 | 0.0 | 0.0 | 0.0 | 0.0 |
| Lrrc52       | 0.1 | 0.0 | 0.0 | 0.0 | 0.0 | 0.0 | 0.1 | 0.0 | 0.0 | 0.0 | 0.0 | 0.0 |
| Lrrc6        | 0.1 | 0.0 | 0.0 | 0.0 | 0.0 | 0.0 | 0.0 | 0.0 | 0.0 | 0.0 | 0.0 | 0.0 |
| Lrrc63       | 0.0 | 0.0 | 0.0 | 0.0 | 0.0 | 0.0 | 0.0 | 0.0 | 0.0 | 0.0 | 0.0 | 0.0 |
| Lrrc66       | 0.0 | 0.0 | 0.0 | 0.0 | 0.0 | 0.0 | 0.0 | 0.0 | 0.0 | 0.0 | 0.0 | 0.0 |
| Lrrc7        | 0.0 | 0.0 | 0.0 | 0.0 | 0.0 | 0.0 | 0.0 | 0.0 | 0.0 | 0.0 | 0.0 | 0.0 |
| Lrrtm1       | 0.0 | 0.0 | 0.0 | 0.0 | 0.0 | 0.0 | 0.0 | 0.0 | 0.0 | 0.0 | 0.0 | 0.0 |
| Ltb          | 0.1 | 0.0 | 0.0 | 0.2 | 0.0 | 0.0 | 0.1 | 0.0 | 0.0 | 0.0 | 0.0 | 0.0 |
| Luzp4        | 0.0 | 0.0 | 0.0 | 0.0 | 0.0 | 0.0 | 0.0 | 0.0 | 0.0 | 0.0 | 0.0 | 0.0 |
| Ly6g6c       | 0.0 | 0.0 | 0.0 | 0.0 | 0.0 | 0.0 | 0.0 | 0.0 | 0.0 | 0.0 | 0.0 | 0.0 |
| Ly6g6d       | 0.0 | 0.0 | 0.1 | 0.3 | 0.1 | 0.0 | 0.0 | 0.0 | 0.0 | 0.0 | 0.0 | 0.0 |
| Ly6g6f       | 0.0 | 0.0 | 0.0 | 0.0 | 0.0 | 0.0 | 0.0 | 0.0 | 0.0 | 0.0 | 0.0 | 0.0 |
| Ly6h         | 0.0 | 0.1 | 0.0 | 0.0 | 0.0 | 0.0 | 0.0 | 0.0 | 0.0 | 0.0 | 0.0 | 0.0 |
| Lyg2         | 0.0 | 0.0 | 0.0 | 0.0 | 0.0 | 0.0 | 0.0 | 0.0 | 0.0 | 0.0 | 0.0 | 0.0 |
| Lypd3        | 0.0 | 0.0 | 0.0 | 0.0 | 0.0 | 0.0 | 0.0 | 0.0 | 0.0 | 0.0 | 0.0 | 0.0 |
| Lypd4        | 0.0 | 0.0 | 0.0 | 0.0 | 0.0 | 0.0 | 0.0 | 0.0 | 0.0 | 0.0 | 0.0 | 0.0 |
| Lypd8        | 0.0 | 0.0 | 0.0 | 0.0 | 0.0 | 0.0 | 0.0 | 0.0 | 0.0 | 0.0 | 0.0 | 0.0 |
| Magea5       | 0.0 | 0.0 | 0.0 | 0.0 | 0.0 | 0.0 | 0.0 | 0.0 | 0.0 | 0.0 | 0.0 | 0.0 |
| Magea6       | 0.0 | 0.0 | 0.0 | 0.0 | 0.0 | 0.0 | 0.0 | 0.0 | 0.0 | 0.0 | 0.0 | 0.0 |
| Magea8       | 0.0 | 0.0 | 0.0 | 0.0 | 0.0 | 0.0 | 0.0 | 0.0 | 0.0 | 0.0 | 0.0 | 0.0 |
| Mageb1       | 0.0 | 0.0 | 0.0 | 0.0 | 0.0 | 0.0 | 0.0 | 0.0 | 0.0 | 0.0 | 0.0 | 0.0 |
| Mageb18      | 0.0 | 0.0 | 0.0 | 0.0 | 0.0 | 0.0 | 0.0 | 0.0 | 0.0 | 0.0 | 0.0 | 0.0 |
| Mageb3       | 0.0 | 0.0 | 0.0 | 0.0 | 0.0 | 0.0 | 0.0 | 0.0 | 0.0 | 0.0 | 0.0 | 0.0 |
| Mage12       | 0.0 | 0.0 | 0.0 | 0.0 | 0.0 | 0.0 | 0.0 | 0.0 | 0.0 | 0.0 | 0.0 | 0.0 |
| Marveld3     | 0.0 | 0.0 | 0.0 | 0.1 | 0.0 | 0.0 | 0.0 | 0.0 | 0.0 | 0.0 | 0.0 | 0.0 |
| Matn1        | 0.0 | 0.0 | 0.0 | 0.0 | 0.1 | 0.0 | 0.0 | 0.0 | 0.0 | 0.0 | 0.0 | 0.0 |
| Mb           | 0.0 | 0.0 | 0.1 | 0.0 | 0.0 | 0.0 | 0.0 | 0.0 | 0.0 | 0.0 | 0.2 | 0.0 |
| Mbd311       | 0.0 | 0.0 | 0.0 | 0.0 | 0.0 | 0.0 | 0.0 | 0.0 | 0.0 | 0.1 | 0.0 | 0.0 |
| Mbd312       | 0.0 | 0.0 | 0.0 | 0.0 | 0.0 | 0.0 | 0.0 | 0.0 | 0.0 | 0.0 | 0.0 | 0.0 |
| Mbl1         | 0.0 | 0.0 | 0.0 | 0.0 | 0.0 | 0.0 | 0.0 | 0.0 | 0.0 | 0.0 | 0.0 | 0.0 |
| Mbl2         | 0.0 | 0.0 | 0.0 | 0.0 | 0.0 | 0.0 | 0.1 | 0.2 | 0.0 | 0.1 | 0.0 | 0.1 |
| Mcf2         | 0.0 | 0.0 | 0.0 | 0.0 | 0.0 | 0.0 | 0.0 | 0.0 | 0.0 | 0.0 | 0.0 | 0.0 |
| Mcin         | 0.0 | 0.0 | 0.0 | 0.0 | 0.0 | 0.0 | 0.0 | 0.0 | 0.0 | 0.1 | 0.0 | 0.0 |
| Mcoln3       | 0.0 | 0.1 | 0.0 | 0.0 | 0.0 | 0.0 | 0.0 | 0.0 | 0.0 | 0.0 | 0.0 | 0.0 |
| Mcpt1        | 0.0 | 0.1 | 0.0 | 0.0 | 0.0 | 0.0 | 0.0 | 0.0 | 0.0 | 0.0 | 0.0 | 0.1 |
| Mcpt2        | 0.0 | 0.0 | 0.0 | 0.0 | 0.0 | 0.0 | 0.0 | 0.0 | 0.0 | 0.0 | 0.0 | 0.0 |

Excluded Genes

|           |     |      |      |       |      |     |        |      |       |      |     |      |
|-----------|-----|------|------|-------|------|-----|--------|------|-------|------|-----|------|
| Mcpt9     | 0.0 | 0.0  | 0.0  | 0.0   | 0.0  | 0.0 | 0.0    | 0.0  | 0.0   | 0.0  | 0.0 | 0.0  |
| Mcpt-ps1  | 0.0 | 0.0  | 0.0  | 0.0   | 0.0  | 0.0 | 0.0    | 0.0  | 0.0   | 0.0  | 0.1 | 0.1  |
| Mei4      | 0.0 | 0.0  | 0.0  | 0.0   | 0.0  | 0.0 | 0.0    | 0.0  | 0.0   | 0.1  | 0.0 | 0.0  |
| Meig1     | 0.2 | 0.0  | 0.0  | 1.0   | 0.0  | 0.0 | 0.0    | 0.1  | 0.1   | 0.0  | 0.0 | 0.1  |
| Mep1b     | 0.0 | 0.0  | 0.0  | 0.0   | 0.0  | 0.0 | 0.0    | 0.0  | 0.0   | 0.0  | 0.0 | 0.0  |
| Mepe      | 0.0 | 0.0  | 0.0  | 0.0   | 0.0  | 0.0 | 0.0    | 0.0  | 0.0   | 0.0  | 0.0 | 0.0  |
| Mesp1     | 0.0 | 0.0  | 0.0  | 0.0   | 0.0  | 0.0 | 0.0    | 0.0  | 0.0   | 0.0  | 0.1 | 0.0  |
| Mettl11b  | 0.0 | 0.0  | 0.0  | 0.0   | 0.0  | 0.0 | 0.0    | 0.0  | 0.0   | 0.0  | 0.0 | 0.0  |
| Mfsd6l    | 0.0 | 0.0  | 0.0  | 0.0   | 0.0  | 0.0 | 0.0    | 0.0  | 0.0   | 0.0  | 0.0 | 0.0  |
| Mia2      | 0.0 | 0.0  | 0.0  | 0.0   | 0.0  | 0.0 | 0.0    | 0.0  | 0.0   | 0.0  | 0.0 | 0.0  |
| Mill1     | 0.0 | 0.0  | 0.0  | 0.0   | 0.0  | 0.0 | 0.0    | 0.0  | 0.0   | 0.0  | 0.0 | 0.0  |
| Miox      | 0.1 | 0.0  | 0.0  | 0.0   | 0.0  | 0.0 | 0.0    | 0.0  | 0.1   | 0.0  | 0.1 | 0.0  |
| Mir10a    | 0.0 | 0.0  | 0.0  | 0.0   | 0.0  | 0.0 | 0.0    | 0.0  | 0.0   | 0.0  | 0.0 | 5.0  |
| Mir1186   | 0.0 | 0.0  | 0.0  | 0.0   | 0.0  | 0.0 | 0.0    | 0.0  | 0.0   | 3.5  | 0.0 | 0.0  |
| Mir1188   | 0.0 | 12.3 | 0.0  | 0.0   | 0.0  | 0.0 | 0.0    | 0.0  | 0.0   | 0.0  | 0.0 | 0.0  |
| Mir1192   | 0.0 | 0.0  | 0.0  | 0.0   | 0.0  | 0.0 | 0.0    | 0.0  | 0.0   | 0.0  | 0.0 | 0.0  |
| Mir1193   | 0.0 | 0.0  | 0.0  | 0.0   | 0.0  | 0.0 | 0.0    | 0.0  | 0.0   | 0.0  | 0.0 | 0.0  |
| Mir1197   | 0.0 | 0.0  | 0.0  | 0.0   | 0.0  | 0.0 | 0.0    | 0.0  | 0.0   | 0.0  | 5.4 | 0.0  |
| Mir1247   | 0.0 | 0.0  | 0.0  | 0.0   | 0.0  | 0.0 | 0.0    | 30.4 | 0.0   | 0.0  | 0.0 | 0.0  |
| Mir1843b  | 0.0 | 0.0  | 0.0  | 0.0   | 0.0  | 0.1 | 0.0    | 0.0  | 0.0   | 0.0  | 0.0 | 11.9 |
| Mir1892   | 0.0 | 0.0  | 0.0  | 0.0   | 0.0  | 0.0 | 0.0    | 0.0  | 0.0   | 0.0  | 0.0 | 0.0  |
| Mir1894   | 0.0 | 0.0  | 0.0  | 0.0   | 0.0  | 0.0 | 0.0    | 0.0  | 0.0   | 0.0  | 0.0 | 30.8 |
| Mir1896   | 0.0 | 0.0  | 47.8 | 0.0   | 0.0  | 0.0 | 0.0    | 0.0  | 0.0   | 0.0  | 0.0 | 0.0  |
| Mir1903   | 0.0 | 0.0  | 0.0  | 0.0   | 0.0  | 0.0 | 0.0    | 0.0  | 0.0   | 0.0  | 0.0 | 0.0  |
| Mir1905   | 0.0 | 0.0  | 0.0  | 0.0   | 22.6 | 0.0 | 0.0    | 0.0  | 0.0   | 35.5 | 0.0 | 0.0  |
| Mir1906-1 | 0.0 | 0.0  | 0.0  | 10.2  | 0.0  | 0.0 | 0.0    | 0.0  | 0.0   | 10.5 | 0.0 | 0.0  |
| Mir1938   | 0.0 | 0.0  | 0.0  | 11.0  | 0.0  | 0.0 | 0.0    | 0.0  | 9.0   | 0.0  | 0.0 | 0.0  |
| Mir194-1  | 0.0 | 0.0  | 0.0  | 0.0   | 95.9 | 0.0 | 0.0    | 0.0  | 0.0   | 0.0  | 0.0 | 0.0  |
| Mir1946a  | 0.0 | 0.0  | 0.0  | 0.0   | 0.0  | 0.0 | 0.0    | 0.0  | 0.0   | 0.0  | 0.0 | 0.0  |
| Mir1949   | 0.0 | 0.0  | 0.0  | 0.0   | 0.0  | 0.0 | 0.0    | 96.9 | 0.0   | 0.0  | 0.0 | 0.0  |
| Mir1955   | 0.0 | 0.0  | 0.0  | 0.0   | 0.0  | 0.0 | 0.0    | 0.0  | 0.0   | 0.0  | 0.0 | 0.0  |
| Mir1966   | 0.0 | 0.0  | 0.0  | 0.0   | 0.0  | 0.0 | 0.0    | 0.0  | 0.0   | 0.0  | 0.0 | 0.0  |
| Mir199a-2 | 0.0 | 0.0  | 0.0  | 0.0   | 0.0  | 0.0 | 0.0    | 0.0  | 0.0   | 0.0  | 0.0 | 0.0  |
| Mir207    | 0.0 | 0.0  | 0.0  | 0.0   | 0.0  | 0.0 | 0.0    | 0.0  | 0.0   | 0.0  | 0.0 | 0.0  |
| Mir214    | 0.0 | 0.0  | 0.0  | 0.0   | 0.0  | 0.0 | 0.0    | 0.0  | 0.0   | 0.0  | 0.0 | 0.0  |
| Mir219-1  | 0.0 | 0.0  | 0.0  | 0.0   | 0.0  | 0.0 | 5.1    | 0.0  | 5.3   | 5.9  | 0.0 | 0.0  |
| Mir219-2  | 0.0 | 0.0  | 0.0  | 0.0   | 0.0  | 0.0 | 0.0    | 0.0  | 0.0   | 0.0  | 0.0 | 0.0  |
| Mir221    | 0.0 | 0.0  | 0.0  | 0.0   | 0.0  | 0.0 | 0.0    | 0.0  | 0.0   | 0.0  | 0.0 | 0.0  |
| Mir222    | 0.0 | 0.0  | 0.0  | 0.0   | 0.0  | 0.0 | 0.0    | 0.0  | 0.0   | 0.0  | 0.0 | 0.0  |
| Mir223    | 0.0 | 0.0  | 0.0  | 0.0   | 0.0  | 0.0 | 0.0    | 0.0  | 0.0   | 0.0  | 0.0 | 0.0  |
| Mir23b    | 0.0 | 13.7 | 0.0  | 0.0   | 0.0  | 0.0 | 0.0    | 0.0  | 0.0   | 0.0  | 0.0 | 0.0  |
| Mir24-1   | 0.0 | 0.0  | 0.0  | 0.0   | 0.0  | 0.0 | 0.0    | 0.0  | 122.7 | 0.0  | 0.0 | 0.0  |
| Mir27a    | 0.0 | 0.0  | 0.0  | 0.0   | 0.0  | 0.0 | 55.0   | 0.0  | 0.0   | 0.0  | 0.0 | 0.0  |
| Mir2861   | 0.0 | 0.0  | 22.1 | 0.0   | 22.6 | 0.0 | 0.0    | 0.0  | 0.0   | 0.0  | 0.0 | 0.0  |
| Mir3064   | 0.0 | 0.0  | 0.0  | 896.3 | 0.0  | 0.0 | 0.0    | 0.0  | 0.0   | 0.0  | 0.0 | 0.0  |
| Mir3065   | 0.0 | 0.0  | 0.0  | 0.0   | 0.0  | 0.0 | 0.0    | 0.0  | 0.0   | 0.0  | 0.0 | 0.0  |
| Mir3066   | 0.0 | 0.0  | 0.0  | 0.0   | 0.0  | 0.0 | 0.0    | 0.0  | 0.0   | 0.0  | 0.0 | 0.0  |
| Mir3067   | 0.0 | 0.0  | 0.0  | 0.0   | 0.0  | 0.0 | 0.0    | 0.0  | 0.0   | 0.0  | 0.0 | 0.0  |
| Mir3068   | 0.0 | 0.0  | 0.0  | 0.0   | 0.0  | 0.0 | 0.0    | 0.0  | 0.0   | 0.0  | 0.0 | 0.0  |
| Mir3070a  | 0.0 | 0.0  | 0.0  | 0.0   | 0.0  | 0.0 | 0.0    | 0.0  | 0.0   | 0.0  | 0.0 | 8.3  |
| Mir3070b  | 0.0 | 0.0  | 0.0  | 0.0   | 0.0  | 0.0 | 0.0    | 0.0  | 0.0   | 0.0  | 0.0 | 8.3  |
| Mir3096   | 0.0 | 0.0  | 0.0  | 0.0   | 0.0  | 0.0 | 0.0    | 0.0  | 8.5   | 0.0  | 0.0 | 0.0  |
| Mir3096b  | 0.0 | 0.0  | 0.0  | 0.0   | 0.0  | 0.0 | 14.1   | 0.0  | 0.0   | 0.0  | 0.0 | 0.0  |
| Mir3101   | 0.0 | 0.0  | 0.0  | 0.0   | 0.0  | 0.0 | 0.0    | 0.0  | 0.0   | 0.0  | 0.0 | 0.0  |
| Mir3109   | 0.0 | 0.0  | 0.0  | 0.0   | 0.0  | 0.0 | 0.0    | 0.0  | 0.0   | 0.0  | 0.0 | 0.0  |
| Mir320    | 0.0 | 0.0  | 0.0  | 0.0   | 0.0  | 0.0 | 1756.0 | 0.0  | 0.0   | 0.0  | 0.0 | 0.0  |
| Mir324    | 0.0 | 0.0  | 0.0  | 0.0   | 0.0  | 0.0 | 0.0    | 0.0  | 17.7  | 0.0  | 0.0 | 0.0  |

Excluded Genes

|            |     |      |      |      |     |       |      |      |      |      |       |     |
|------------|-----|------|------|------|-----|-------|------|------|------|------|-------|-----|
| Mir331     | 0.0 | 0.0  | 0.0  | 0.0  | 0.0 | 0.0   | 0.0  | 11.5 | 0.0  | 0.0  | 0.0   | 0.0 |
| Mir343     | 0.0 | 0.0  | 0.0  | 0.0  | 0.0 | 0.0   | 0.0  | 0.0  | 0.0  | 0.0  | 0.0   | 0.0 |
| Mir3470b   | 0.0 | 12.8 | 0.0  | 0.0  | 0.0 | 0.0   | 0.0  | 0.0  | 0.0  | 0.0  | 0.0   | 0.0 |
| Mir3471-1  | 0.0 | 35.3 | 11.3 | 1.8  | 0.0 | 0.0   | 1.0  | 0.0  | 0.0  | 0.0  | 0.0   | 0.4 |
| Mir3473    | 0.0 | 0.0  | 0.0  | 0.0  | 0.0 | 0.0   | 0.0  | 0.0  | 0.0  | 0.0  | 0.0   | 0.0 |
| Mir34b     | 0.0 | 0.0  | 0.0  | 29.7 | 0.0 | 0.0   | 0.0  | 0.0  | 0.0  | 0.0  | 0.0   | 0.0 |
| Mir425     | 0.0 | 0.0  | 0.0  | 0.0  | 0.0 | 0.0   | 0.0  | 0.0  | 0.0  | 0.0  | 0.0   | 0.0 |
| Mir429     | 0.0 | 0.0  | 0.0  | 0.0  | 0.0 | 0.0   | 0.0  | 0.0  | 0.0  | 0.0  | 0.0   | 0.0 |
| Mir431     | 0.0 | 0.0  | 0.0  | 0.0  | 0.0 | 0.0   | 0.0  | 0.0  | 0.0  | 0.0  | 0.0   | 0.0 |
| Mir432     | 0.0 | 0.0  | 0.0  | 0.0  | 0.0 | 0.0   | 0.0  | 0.0  | 0.0  | 0.0  | 0.0   | 0.0 |
| Mir433     | 0.0 | 0.0  | 0.0  | 0.0  | 0.6 | 0.0   | 0.0  | 0.0  | 0.1  | 0.0  | 2.6   | 0.0 |
| Mir5046    | 0.0 | 0.0  | 0.0  | 0.0  | 0.0 | 0.0   | 0.0  | 0.0  | 0.0  | 0.0  | 0.0   | 0.0 |
| Mir5109    | 0.0 | 0.0  | 0.0  | 0.0  | 0.0 | 0.0   | 3.7  | 0.0  | 0.0  | 0.0  | 0.0   | 0.0 |
| Mir5113    | 0.0 | 0.0  | 0.0  | 0.0  | 0.0 | 0.0   | 0.0  | 0.0  | 0.0  | 0.0  | 0.0   | 0.0 |
| Mir5114    | 0.0 | 0.0  | 0.0  | 0.0  | 0.0 | 0.0   | 0.0  | 0.0  | 0.0  | 0.0  | 0.0   | 0.0 |
| Mir5117    | 0.0 | 0.0  | 0.0  | 0.0  | 0.0 | 0.0   | 0.0  | 0.0  | 0.0  | 0.0  | 0.0   | 0.0 |
| Mir5121    | 0.0 | 0.0  | 0.0  | 0.0  | 0.0 | 0.0   | 0.0  | 0.0  | 62.5 | 0.0  | 0.0   | 0.0 |
| Mir5122    | 0.0 | 0.0  | 0.0  | 0.0  | 0.0 | 0.0   | 0.0  | 0.0  | 0.0  | 0.0  | 0.0   | 0.0 |
| Mir5130    | 0.0 | 0.0  | 0.0  | 0.0  | 0.0 | 0.0   | 0.0  | 0.0  | 0.0  | 0.0  | 0.0   | 0.0 |
| Mir5131    | 0.0 | 0.0  | 0.0  | 0.0  | 0.0 | 0.0   | 0.0  | 1.8  | 0.0  | 0.0  | 0.0   | 0.0 |
| Mir5133    | 0.0 | 60.8 | 0.0  | 0.0  | 0.0 | 58.6  | 0.0  | 0.0  | 0.0  | 0.0  | 0.0   | 0.0 |
| Mir5136    | 0.0 | 0.0  | 0.0  | 0.0  | 0.0 | 0.0   | 0.0  | 0.0  | 0.0  | 0.0  | 0.0   | 0.0 |
| Mir667     | 0.0 | 0.0  | 0.0  | 0.0  | 0.0 | 0.0   | 0.0  | 0.0  | 0.0  | 0.0  | 0.0   | 0.0 |
| Mir677     | 0.0 | 0.0  | 0.0  | 0.0  | 0.0 | 0.0   | 0.0  | 0.0  | 0.0  | 50.6 | 0.0   | 0.0 |
| Mir684-2   | 0.0 | 0.0  | 0.0  | 0.0  | 0.0 | 0.0   | 0.0  | 0.0  | 0.0  | 8.0  | 0.0   | 8.3 |
| Mir690     | 0.0 | 0.0  | 0.0  | 0.0  | 0.0 | 0.0   | 0.0  | 2.8  | 0.0  | 0.0  | 0.0   | 0.0 |
| Mir705     | 0.0 | 0.0  | 0.0  | 0.0  | 0.0 | 0.0   | 0.0  | 0.0  | 0.0  | 0.0  | 0.0   | 0.0 |
| Mir7-1     | 0.0 | 0.0  | 0.0  | 7.3  | 0.0 | 0.0   | 0.0  | 0.0  | 0.0  | 6.5  | 0.0   | 0.0 |
| Mir760     | 0.0 | 0.0  | 0.0  | 0.0  | 3.0 | 0.0   | 0.0  | 0.0  | 0.0  | 0.0  | 0.0   | 0.0 |
| Mir762     | 0.0 | 0.0  | 0.0  | 0.0  | 0.0 | 0.0   | 44.1 | 0.0  | 0.0  | 0.0  | 224.8 | 0.0 |
| Mir877     | 0.0 | 0.0  | 0.0  | 0.0  | 0.0 | 0.0   | 0.0  | 0.0  | 0.0  | 0.0  | 0.0   | 0.0 |
| Mir99b     | 0.0 | 0.0  | 0.0  | 0.0  | 0.0 | 121.6 | 0.0  | 0.0  | 0.0  | 0.0  | 0.0   | 0.0 |
| Mirlet7a-1 | 0.0 | 0.0  | 0.0  | 0.0  | 0.0 | 0.0   | 0.0  | 0.0  | 0.0  | 14.8 | 0.0   | 0.0 |
| Mirlet7a-2 | 0.0 | 0.0  | 0.0  | 0.0  | 0.0 | 0.0   | 0.0  | 0.0  | 0.0  | 0.0  | 0.0   | 0.0 |
| Mirlet7f-1 | 0.0 | 0.0  | 0.0  | 0.0  | 0.0 | 0.0   | 0.0  | 0.0  | 0.0  | 0.0  | 0.0   | 0.0 |
| Mirlet7i   | 0.0 | 0.0  | 0.0  | 0.0  | 0.0 | 0.0   | 0.0  | 0.0  | 23.7 | 0.0  | 0.0   | 0.0 |
| Mlc1       | 0.0 | 0.0  | 0.0  | 0.0  | 0.0 | 0.0   | 0.0  | 0.0  | 0.0  | 0.0  | 0.0   | 0.0 |
| Mlip       | 0.1 | 0.0  | 0.0  | 0.0  | 0.0 | 0.0   | 0.0  | 0.0  | 0.0  | 0.0  | 0.0   | 0.0 |
| Mmd2       | 0.0 | 0.0  | 0.0  | 0.0  | 0.0 | 0.0   | 0.0  | 0.0  | 0.0  | 0.0  | 0.0   | 0.0 |
| Mnx1       | 0.0 | 0.0  | 0.0  | 0.0  | 0.0 | 0.0   | 0.0  | 0.0  | 0.0  | 0.0  | 0.0   | 0.0 |
| Mobp       | 0.0 | 0.0  | 0.0  | 0.0  | 0.0 | 0.0   | 0.0  | 0.0  | 0.0  | 0.0  | 0.0   | 0.0 |
| Mos        | 0.0 | 0.0  | 0.0  | 0.0  | 0.0 | 0.0   | 0.0  | 0.0  | 0.0  | 0.0  | 0.0   | 0.0 |
| Mospd4     | 0.0 | 0.1  | 0.0  | 0.0  | 0.0 | 0.0   | 0.0  | 0.0  | 0.0  | 0.2  | 0.1   | 0.0 |
| Mptx1      | 0.0 | 0.0  | 0.0  | 0.0  | 0.0 | 0.0   | 0.1  | 0.0  | 0.0  | 0.1  | 0.0   | 0.0 |
| Mptx2      | 0.0 | 0.0  | 0.0  | 0.0  | 0.0 | 0.0   | 0.1  | 0.0  | 0.0  | 0.0  | 0.0   | 0.0 |
| Mrap2      | 0.0 | 0.0  | 0.0  | 0.0  | 0.0 | 0.0   | 0.0  | 0.0  | 0.0  | 0.0  | 0.0   | 0.0 |
| Mrgpra1    | 0.0 | 0.0  | 0.0  | 0.0  | 0.0 | 0.0   | 0.0  | 0.0  | 0.0  | 0.0  | 0.0   | 0.0 |
| Mrgpra2a   | 0.0 | 0.0  | 0.0  | 0.0  | 0.0 | 0.0   | 0.0  | 0.0  | 0.0  | 0.0  | 0.0   | 0.0 |
| Mrgpra3    | 0.0 | 0.0  | 0.0  | 0.0  | 0.0 | 0.0   | 0.0  | 0.0  | 0.0  | 0.0  | 0.0   | 0.0 |
| Mrgpra4    | 0.0 | 0.0  | 0.0  | 0.0  | 0.0 | 0.0   | 0.0  | 0.0  | 0.0  | 0.0  | 0.0   | 0.0 |
| Mrgpra6    | 0.0 | 0.0  | 0.0  | 0.0  | 0.0 | 0.0   | 0.0  | 0.0  | 0.0  | 0.0  | 0.0   | 0.0 |
| Mrgpra9    | 0.0 | 0.0  | 0.0  | 0.0  | 0.0 | 0.0   | 0.0  | 0.0  | 0.0  | 0.0  | 0.0   | 0.0 |
| Mrgprb1    | 0.0 | 0.0  | 0.0  | 0.0  | 0.0 | 0.0   | 0.0  | 0.0  | 0.0  | 0.0  | 0.0   | 0.0 |
| Mrgprb2    | 0.0 | 0.0  | 0.0  | 0.0  | 0.0 | 0.0   | 0.0  | 0.0  | 0.0  | 0.0  | 0.0   | 0.0 |
| Mrgprb8    | 0.0 | 0.0  | 0.0  | 0.0  | 0.0 | 0.0   | 0.0  | 0.0  | 0.0  | 0.0  | 0.0   | 0.0 |
| Mrgprd     | 0.0 | 0.0  | 0.0  | 0.0  | 0.0 | 0.0   | 0.0  | 0.0  | 0.0  | 0.0  | 0.1   | 0.0 |
| Mrgprg     | 0.0 | 0.0  | 0.0  | 0.0  | 0.0 | 0.0   | 0.1  | 0.0  | 0.0  | 0.0  | 0.0   | 0.0 |

Excluded Genes



|         |     |     |     |     |     |     |     |     |     |     |     |     |
|---------|-----|-----|-----|-----|-----|-----|-----|-----|-----|-----|-----|-----|
| Mrgprh  | 0.0 | 0.0 | 0.0 | 0.0 | 0.0 | 0.0 | 0.0 | 0.0 | 0.0 | 0.0 | 0.0 | 0.0 |
| Mroh4   | 0.0 | 0.0 | 0.0 | 0.1 | 0.0 | 0.0 | 0.0 | 0.0 | 0.0 | 0.0 | 0.0 | 0.0 |
| Mroh5   | 0.0 | 0.0 | 0.0 | 0.2 | 0.0 | 0.0 | 0.0 | 0.0 | 0.0 | 0.0 | 0.0 | 0.0 |
| Mroh9   | 0.0 | 0.0 | 0.0 | 0.0 | 0.0 | 0.0 | 0.0 | 0.0 | 0.0 | 0.0 | 0.0 | 0.0 |
| Ms4a1   | 0.0 | 0.0 | 0.0 | 0.0 | 0.0 | 0.0 | 0.0 | 0.0 | 0.0 | 0.0 | 0.1 | 0.0 |
| Ms4a10  | 0.0 | 0.0 | 0.0 | 0.0 | 0.0 | 0.0 | 0.0 | 0.0 | 0.0 | 0.0 | 0.0 | 0.0 |
| Ms4a13  | 0.0 | 0.0 | 0.0 | 0.0 | 0.0 | 0.0 | 0.0 | 0.0 | 0.0 | 0.0 | 0.0 | 0.0 |
| Ms4a15  | 0.0 | 0.0 | 0.0 | 0.0 | 0.0 | 0.0 | 0.0 | 0.0 | 0.0 | 0.0 | 0.0 | 0.0 |
| Ms4a3   | 0.0 | 0.0 | 0.0 | 0.0 | 0.0 | 0.0 | 0.0 | 0.0 | 0.0 | 0.0 | 0.0 | 0.0 |
| Ms4a5   | 0.0 | 0.0 | 0.0 | 0.0 | 0.0 | 0.0 | 0.0 | 0.0 | 0.0 | 0.0 | 0.0 | 0.0 |
| Msemb   | 0.1 | 0.1 | 0.0 | 0.0 | 0.0 | 0.0 | 0.0 | 0.0 | 0.0 | 0.1 | 0.1 | 0.0 |
| Msx3    | 0.0 | 0.0 | 0.0 | 0.0 | 0.0 | 0.0 | 0.0 | 0.0 | 0.0 | 0.0 | 0.0 | 0.0 |
| Muc20   | 0.0 | 0.0 | 0.0 | 0.0 | 0.0 | 0.0 | 0.0 | 0.0 | 0.0 | 0.0 | 0.0 | 0.0 |
| Muc4    | 0.0 | 0.0 | 0.0 | 0.0 | 0.0 | 0.0 | 0.0 | 0.0 | 0.0 | 0.0 | 0.0 | 0.0 |
| Muc5ac  | 0.0 | 0.0 | 0.0 | 0.0 | 0.0 | 0.0 | 0.0 | 0.0 | 0.0 | 0.0 | 0.0 | 0.0 |
| Mug1    | 0.0 | 0.0 | 0.0 | 0.0 | 0.0 | 0.0 | 0.0 | 0.0 | 0.0 | 0.0 | 0.0 | 0.0 |
| Mup1    | 0.0 | 0.0 | 0.0 | 0.0 | 0.0 | 0.0 | 0.0 | 0.0 | 0.0 | 0.0 | 0.0 | 0.0 |
| Mup10   | 0.0 | 0.0 | 0.0 | 0.0 | 0.0 | 0.0 | 0.0 | 0.0 | 0.0 | 0.0 | 0.0 | 0.0 |
| Mup11   | 0.0 | 0.0 | 0.0 | 0.0 | 0.0 | 0.0 | 0.0 | 0.0 | 0.0 | 0.0 | 0.0 | 0.0 |
| Mup12   | 0.0 | 0.0 | 0.0 | 0.0 | 0.0 | 0.0 | 0.0 | 0.0 | 0.0 | 0.0 | 0.0 | 0.0 |
| Mup13   | 0.0 | 0.0 | 0.0 | 0.0 | 0.0 | 0.0 | 0.0 | 0.0 | 0.0 | 0.0 | 0.0 | 0.0 |
| Mup14   | 0.0 | 0.0 | 0.0 | 0.0 | 0.0 | 0.0 | 0.0 | 0.0 | 0.0 | 0.0 | 0.0 | 0.0 |
| Mup15   | 0.0 | 0.0 | 0.0 | 0.0 | 0.0 | 0.0 | 0.0 | 0.0 | 0.0 | 0.0 | 0.0 | 0.0 |
| Mup16   | 0.0 | 0.0 | 0.0 | 0.0 | 0.0 | 0.0 | 0.0 | 0.0 | 0.0 | 0.0 | 0.0 | 0.0 |
| Mup19   | 0.0 | 0.0 | 0.0 | 0.0 | 0.0 | 0.0 | 0.0 | 0.0 | 0.0 | 0.0 | 0.0 | 0.0 |
| Mup2    | 0.0 | 0.0 | 0.0 | 0.0 | 0.0 | 0.0 | 0.0 | 0.0 | 0.0 | 0.0 | 0.0 | 0.0 |
| Mup7    | 0.0 | 0.0 | 0.0 | 0.0 | 0.0 | 0.0 | 0.0 | 0.0 | 0.0 | 0.0 | 0.0 | 0.0 |
| Mup8    | 0.0 | 0.0 | 0.0 | 0.0 | 0.0 | 0.0 | 0.0 | 0.0 | 0.0 | 0.0 | 0.0 | 0.0 |
| Mup9    | 0.0 | 0.0 | 0.0 | 0.0 | 0.0 | 0.0 | 0.0 | 0.0 | 0.0 | 0.0 | 0.0 | 0.0 |
| Myadml2 | 0.0 | 0.0 | 0.0 | 0.0 | 0.0 | 0.0 | 0.0 | 0.0 | 0.0 | 0.0 | 0.0 | 0.0 |
| Mybpc1  | 0.0 | 0.0 | 0.0 | 0.0 | 0.0 | 0.0 | 0.0 | 0.0 | 0.0 | 0.0 | 0.0 | 0.0 |
| Mybphl  | 0.0 | 0.0 | 0.0 | 0.0 | 0.0 | 0.0 | 0.0 | 0.0 | 0.0 | 0.0 | 0.0 | 0.0 |
| Myf5    | 0.0 | 0.0 | 0.0 | 0.0 | 0.0 | 0.0 | 0.0 | 0.0 | 0.0 | 0.0 | 0.0 | 0.0 |
| Myh7    | 0.0 | 0.0 | 0.0 | 0.0 | 0.0 | 0.0 | 0.0 | 0.0 | 0.0 | 0.0 | 0.0 | 0.0 |
| Mylk4   | 0.0 | 0.0 | 0.0 | 0.0 | 0.0 | 0.0 | 0.0 | 0.0 | 0.0 | 0.0 | 0.0 | 0.0 |
| Myo3a   | 0.0 | 0.0 | 0.0 | 0.0 | 0.0 | 0.0 | 0.0 | 0.0 | 0.0 | 0.0 | 0.0 | 0.0 |
| Myo7b   | 0.0 | 0.0 | 0.0 | 0.0 | 0.0 | 0.0 | 0.0 | 0.0 | 0.0 | 0.0 | 0.0 | 0.0 |
| Myod1   | 0.0 | 0.0 | 0.0 | 0.0 | 0.0 | 0.0 | 0.0 | 0.0 | 0.0 | 0.0 | 0.0 | 0.0 |
| Myog    | 0.1 | 0.0 | 0.0 | 0.0 | 0.0 | 0.0 | 0.0 | 0.0 | 0.0 | 0.0 | 0.0 | 0.0 |
| Mzb1    | 0.0 | 0.0 | 0.0 | 0.0 | 0.0 | 0.0 | 0.0 | 0.0 | 0.0 | 0.0 | 0.1 | 0.0 |
| Naa11   | 0.0 | 0.0 | 0.0 | 0.0 | 0.0 | 0.0 | 0.0 | 0.0 | 0.0 | 0.0 | 0.0 | 0.0 |
| Nags    | 0.0 | 0.0 | 0.0 | 0.0 | 0.0 | 0.0 | 0.0 | 0.0 | 0.0 | 0.0 | 0.0 | 0.0 |
| Nanos2  | 0.0 | 0.0 | 0.0 | 0.0 | 0.0 | 0.1 | 0.0 | 0.0 | 0.0 | 0.0 | 0.1 | 0.0 |
| Nanos3  | 0.1 | 0.0 | 0.0 | 0.0 | 0.0 | 0.1 | 0.0 | 0.1 | 0.2 | 0.0 | 0.1 | 0.0 |
| Nat8    | 0.0 | 0.0 | 0.0 | 0.0 | 0.0 | 0.0 | 0.0 | 0.1 | 0.0 | 0.0 | 0.1 | 0.0 |
| Ncan    | 0.0 | 0.0 | 0.0 | 0.0 | 0.0 | 0.0 | 0.0 | 0.0 | 0.0 | 0.0 | 0.0 | 0.0 |
| Nccrp1  | 0.0 | 0.0 | 0.0 | 0.0 | 0.0 | 0.0 | 0.0 | 0.0 | 0.0 | 0.1 | 0.0 | 0.0 |
| Ncr1    | 0.0 | 0.0 | 0.0 | 0.0 | 0.0 | 0.0 | 0.0 | 0.0 | 0.0 | 0.0 | 0.0 | 0.0 |
| Nctc1   | 0.0 | 0.0 | 0.0 | 0.0 | 0.0 | 0.0 | 0.0 | 0.0 | 0.0 | 0.0 | 0.0 | 0.0 |
| Nell1   | 0.0 | 0.0 | 0.0 | 0.0 | 0.0 | 0.0 | 0.0 | 0.0 | 0.0 | 0.0 | 0.0 | 0.0 |
| Neu2    | 0.0 | 0.0 | 0.0 | 0.0 | 0.0 | 0.0 | 0.0 | 0.0 | 0.0 | 0.0 | 0.0 | 0.0 |
| Neu4    | 0.0 | 0.0 | 0.0 | 0.0 | 0.0 | 0.0 | 0.0 | 0.0 | 0.0 | 0.0 | 0.0 | 0.0 |
| Neurod1 | 0.0 | 0.0 | 0.0 | 0.0 | 0.0 | 0.0 | 0.0 | 0.0 | 0.0 | 0.0 | 0.0 | 0.0 |
| Neurod2 | 0.0 | 0.0 | 0.0 | 0.0 | 0.0 | 0.0 | 0.0 | 0.0 | 0.0 | 0.0 | 0.0 | 0.0 |
| Neurod4 | 0.0 | 0.0 | 0.0 | 0.0 | 0.0 | 0.0 | 0.0 | 0.0 | 0.0 | 0.0 | 0.0 | 0.0 |
| Neurod6 | 0.0 | 0.0 | 0.0 | 0.0 | 0.0 | 0.0 | 0.0 | 0.0 | 0.0 | 0.0 | 0.0 | 0.0 |
| Neurog2 | 0.0 | 0.0 | 0.0 | 0.0 | 0.0 | 0.0 | 0.0 | 0.0 | 0.0 | 0.0 | 0.0 | 0.0 |

Excluded Genes

|          |     |     |     |     |     |     |     |     |     |     |     |     |
|----------|-----|-----|-----|-----|-----|-----|-----|-----|-----|-----|-----|-----|
| Ngp      | 0.0 | 0.0 | 0.0 | 0.1 | 0.0 | 0.0 | 0.0 | 0.0 | 0.0 | 0.1 | 0.0 | 0.1 |
| Nhlh2    | 0.0 | 0.0 | 0.0 | 0.0 | 0.0 | 0.0 | 0.0 | 0.0 | 0.0 | 0.0 | 0.0 | 0.0 |
| Ninj2    | 0.0 | 0.1 | 0.0 | 0.0 | 0.0 | 0.2 | 0.0 | 0.1 | 0.1 | 0.0 | 0.0 | 0.0 |
| Nkx1-2   | 0.0 | 0.0 | 0.0 | 0.0 | 0.0 | 0.0 | 0.0 | 0.0 | 0.0 | 0.0 | 0.0 | 0.0 |
| Nkx2-2   | 0.0 | 0.0 | 0.0 | 0.0 | 0.0 | 0.0 | 0.0 | 0.0 | 0.0 | 0.0 | 0.0 | 0.0 |
| Nkx2-2as | 0.0 | 0.0 | 0.0 | 0.0 | 0.0 | 0.0 | 0.0 | 0.0 | 0.0 | 0.0 | 0.0 | 0.0 |
| Nkx2-3   | 0.0 | 0.0 | 0.0 | 0.0 | 0.0 | 0.1 | 0.0 | 0.0 | 0.0 | 0.0 | 0.0 | 0.0 |
| Nkx2-4   | 0.0 | 0.0 | 0.0 | 0.0 | 0.0 | 0.0 | 0.0 | 0.0 | 0.0 | 0.0 | 0.0 | 0.0 |
| Nkx2-6   | 0.0 | 0.0 | 0.0 | 0.0 | 0.0 | 0.0 | 0.0 | 0.0 | 0.0 | 0.0 | 0.0 | 0.0 |
| Nkx3-1   | 0.0 | 0.0 | 0.0 | 0.0 | 0.0 | 0.0 | 0.0 | 0.0 | 0.0 | 0.0 | 0.0 | 0.0 |
| Nkx3-2   | 0.0 | 0.0 | 0.0 | 0.0 | 0.0 | 0.0 | 0.0 | 0.0 | 0.0 | 0.0 | 0.0 | 0.0 |
| Nkx6-1   | 0.0 | 0.0 | 0.0 | 0.0 | 0.0 | 0.0 | 0.0 | 0.0 | 0.0 | 0.0 | 0.0 | 0.0 |
| Nkx6-3   | 0.0 | 0.0 | 0.0 | 0.0 | 0.0 | 0.0 | 0.0 | 0.0 | 0.0 | 0.0 | 0.0 | 0.0 |
| Nlrp14   | 0.0 | 0.0 | 0.0 | 0.0 | 0.0 | 0.0 | 0.0 | 0.0 | 0.0 | 0.0 | 0.0 | 0.0 |
| Nlrp2    | 0.0 | 0.0 | 0.0 | 0.0 | 0.0 | 0.0 | 0.0 | 0.0 | 0.0 | 0.0 | 0.0 | 0.0 |
| Nlrp4c   | 0.0 | 0.0 | 0.0 | 0.0 | 0.0 | 0.0 | 0.0 | 0.0 | 0.0 | 0.0 | 0.0 | 0.0 |
| Nlrp4e   | 0.0 | 0.0 | 0.0 | 0.0 | 0.0 | 0.0 | 0.0 | 0.0 | 0.0 | 0.0 | 0.0 | 0.0 |
| Nlrp4g   | 0.0 | 0.0 | 0.0 | 0.0 | 0.0 | 0.0 | 0.0 | 0.0 | 0.0 | 0.0 | 0.0 | 0.0 |
| Nlrp6    | 0.0 | 0.0 | 0.0 | 0.0 | 0.0 | 0.0 | 0.0 | 0.0 | 0.0 | 0.0 | 0.0 | 0.0 |
| Nlrp9a   | 0.0 | 0.0 | 0.0 | 0.0 | 0.0 | 0.0 | 0.0 | 0.0 | 0.0 | 0.0 | 0.0 | 0.0 |
| Nmbr     | 0.0 | 0.0 | 0.0 | 0.0 | 0.0 | 0.0 | 0.0 | 0.0 | 0.0 | 0.0 | 0.0 | 0.0 |
| Nme8     | 0.0 | 0.0 | 0.0 | 0.0 | 0.0 | 0.0 | 0.0 | 0.0 | 0.0 | 0.0 | 0.0 | 0.0 |
| Nmrk2    | 0.0 | 0.0 | 0.0 | 0.0 | 0.0 | 0.0 | 0.0 | 0.0 | 0.0 | 0.0 | 0.0 | 0.0 |
| Nms      | 0.0 | 0.0 | 0.0 | 0.0 | 0.0 | 0.0 | 0.0 | 0.0 | 0.0 | 0.0 | 0.0 | 0.0 |
| Nmu      | 0.0 | 0.0 | 0.0 | 0.0 | 0.0 | 0.0 | 0.0 | 0.0 | 0.0 | 0.0 | 0.0 | 0.0 |
| Nmur1    | 0.0 | 0.0 | 0.0 | 0.0 | 0.0 | 0.0 | 0.0 | 0.0 | 0.0 | 0.0 | 0.0 | 0.0 |
| Nmur2    | 0.0 | 0.0 | 0.0 | 0.0 | 0.0 | 0.0 | 0.0 | 0.0 | 0.0 | 0.0 | 0.0 | 0.0 |
| Nobox    | 0.0 | 0.0 | 0.0 | 0.0 | 0.0 | 0.0 | 0.0 | 0.0 | 0.0 | 0.0 | 0.0 | 0.0 |
| Noto     | 0.0 | 0.0 | 0.0 | 0.0 | 0.0 | 0.0 | 0.0 | 0.0 | 0.0 | 0.0 | 0.0 | 0.0 |
| Nox3     | 0.0 | 0.0 | 0.0 | 0.0 | 0.1 | 0.0 | 0.0 | 0.0 | 0.0 | 0.0 | 0.1 | 0.0 |
| Npc111   | 0.0 | 0.0 | 0.0 | 0.0 | 0.0 | 0.0 | 0.0 | 0.0 | 0.0 | 0.0 | 0.0 | 0.0 |
| Nppa     | 0.0 | 0.0 | 0.0 | 0.0 | 0.0 | 0.1 | 0.0 | 0.1 | 0.0 | 0.2 | 0.0 | 0.0 |
| Nppc     | 0.0 | 0.0 | 0.0 | 0.0 | 0.0 | 0.0 | 0.0 | 0.0 | 0.0 | 0.1 | 0.0 | 0.1 |
| Npw      | 0.0 | 0.0 | 0.0 | 0.0 | 0.0 | 0.0 | 0.0 | 0.0 | 0.0 | 0.0 | 0.0 | 0.0 |
| Npy5r    | 0.0 | 0.0 | 0.0 | 0.0 | 0.0 | 0.0 | 0.0 | 0.0 | 0.0 | 0.0 | 0.0 | 0.0 |
| Nr0b1    | 0.0 | 0.0 | 0.0 | 0.0 | 0.0 | 0.0 | 0.0 | 0.0 | 0.0 | 0.0 | 0.0 | 0.0 |
| Nr0b2    | 0.0 | 0.0 | 0.0 | 0.1 | 0.0 | 0.0 | 0.0 | 0.0 | 0.0 | 0.0 | 0.0 | 0.0 |
| Nr1i3    | 0.0 | 0.0 | 0.0 | 0.0 | 0.0 | 0.0 | 0.0 | 0.0 | 0.0 | 0.0 | 0.0 | 0.0 |
| Nr2e1    | 0.0 | 0.0 | 0.0 | 0.1 | 0.0 | 0.0 | 0.0 | 0.0 | 0.0 | 0.0 | 0.0 | 0.0 |
| Nr5a1    | 0.0 | 0.0 | 0.0 | 0.0 | 0.0 | 0.0 | 0.0 | 0.0 | 0.0 | 0.0 | 0.0 | 0.0 |
| Nrgn     | 0.0 | 0.1 | 0.0 | 0.0 | 0.0 | 0.0 | 0.0 | 0.0 | 0.0 | 0.0 | 0.0 | 0.0 |
| Nrl      | 0.0 | 0.0 | 0.0 | 0.0 | 0.0 | 0.0 | 0.0 | 0.0 | 0.0 | 0.0 | 0.0 | 0.0 |
| Nrsn1    | 0.0 | 0.0 | 0.0 | 0.0 | 0.0 | 0.0 | 0.0 | 0.0 | 0.0 | 0.0 | 0.0 | 0.0 |
| Nsg2     | 0.0 | 0.0 | 0.0 | 0.0 | 0.0 | 0.0 | 0.0 | 0.0 | 0.0 | 0.0 | 0.0 | 0.0 |
| Nt5c1a   | 0.0 | 0.0 | 0.0 | 0.0 | 0.0 | 0.0 | 0.0 | 0.0 | 0.0 | 0.0 | 0.0 | 0.0 |
| Ntf3     | 0.0 | 0.0 | 0.0 | 0.0 | 0.0 | 0.0 | 0.0 | 0.0 | 0.1 | 0.0 | 0.0 | 0.0 |
| Ntn5     | 0.0 | 0.0 | 0.0 | 0.0 | 0.0 | 0.0 | 0.0 | 0.0 | 0.0 | 0.0 | 0.0 | 0.0 |
| Nts      | 0.0 | 0.0 | 0.0 | 0.0 | 0.1 | 0.0 | 0.0 | 0.1 | 0.0 | 0.0 | 0.0 | 0.0 |
| Ntsr1    | 0.0 | 0.0 | 0.0 | 0.0 | 0.0 | 0.0 | 0.0 | 0.0 | 0.0 | 0.0 | 0.0 | 0.0 |
| Ntsr2    | 0.0 | 0.0 | 0.0 | 0.0 | 0.0 | 0.0 | 0.0 | 0.0 | 0.0 | 0.0 | 0.0 | 0.0 |
| Nxph2    | 0.0 | 0.0 | 0.0 | 0.0 | 0.0 | 0.0 | 0.0 | 0.0 | 0.0 | 0.0 | 0.0 | 0.0 |
| Oas1e    | 0.0 | 0.1 | 0.0 | 0.0 | 0.0 | 0.0 | 0.0 | 0.0 | 0.0 | 0.0 | 0.0 | 0.0 |
| Oas1f    | 0.0 | 0.0 | 0.0 | 0.0 | 0.0 | 0.0 | 0.0 | 0.1 | 0.0 | 0.0 | 0.0 | 0.0 |
| Oas1h    | 0.0 | 0.0 | 0.0 | 0.0 | 0.0 | 0.0 | 0.0 | 0.0 | 0.0 | 0.0 | 0.0 | 0.0 |
| Obox3    | 0.0 | 0.0 | 0.0 | 0.1 | 0.0 | 0.0 | 0.0 | 0.0 | 0.0 | 0.0 | 0.0 | 0.0 |
| Obox6    | 0.0 | 0.0 | 0.0 | 0.0 | 0.0 | 0.0 | 0.0 | 0.0 | 0.0 | 0.0 | 0.0 | 0.0 |
| Ocm      | 0.0 | 0.0 | 0.0 | 0.0 | 0.0 | 0.0 | 0.0 | 0.0 | 0.0 | 0.0 | 0.0 | 0.0 |

Excluded Genes







|         |     |     |     |     |     |     |     |     |     |     |     |     |
|---------|-----|-----|-----|-----|-----|-----|-----|-----|-----|-----|-----|-----|
| Olf790  | 0.0 | 0.0 | 0.0 | 0.0 | 0.0 | 0.0 | 0.0 | 0.0 | 0.0 | 0.0 | 0.0 | 0.0 |
| Olf8    | 0.0 | 0.0 | 0.0 | 0.0 | 0.0 | 0.0 | 0.0 | 0.0 | 0.0 | 0.0 | 0.0 | 0.0 |
| Olf811  | 0.0 | 0.0 | 0.0 | 0.0 | 0.0 | 0.0 | 0.0 | 0.0 | 0.0 | 0.0 | 0.0 | 0.0 |
| Olf827  | 0.0 | 0.0 | 0.0 | 0.0 | 0.0 | 0.0 | 0.0 | 0.0 | 0.1 | 0.0 | 0.0 | 0.0 |
| Olf847  | 0.0 | 0.0 | 0.0 | 0.0 | 0.0 | 0.0 | 0.0 | 0.0 | 0.0 | 0.0 | 0.0 | 0.0 |
| Olf857  | 0.0 | 0.0 | 0.0 | 0.0 | 0.0 | 0.0 | 0.0 | 0.0 | 0.0 | 0.0 | 0.0 | 0.0 |
| Olf862  | 0.0 | 0.0 | 0.0 | 0.0 | 0.0 | 0.0 | 0.0 | 0.0 | 0.0 | 0.0 | 0.0 | 0.0 |
| Olf877  | 0.0 | 0.0 | 0.0 | 0.0 | 0.0 | 0.0 | 0.0 | 0.0 | 0.0 | 0.0 | 0.0 | 0.0 |
| Olf9    | 0.0 | 0.0 | 0.0 | 0.0 | 0.0 | 0.0 | 0.0 | 0.0 | 0.0 | 0.0 | 0.0 | 0.0 |
| Olf90   | 0.0 | 0.0 | 0.0 | 0.0 | 0.0 | 0.1 | 0.0 | 0.0 | 0.0 | 0.0 | 0.0 | 0.0 |
| Olf91   | 0.0 | 0.0 | 0.0 | 0.0 | 0.0 | 0.0 | 0.0 | 0.0 | 0.0 | 0.0 | 0.0 | 0.0 |
| Olf922  | 0.0 | 0.0 | 0.0 | 0.0 | 0.0 | 0.0 | 0.0 | 0.0 | 0.0 | 0.0 | 0.0 | 0.0 |
| Olf923  | 0.0 | 0.0 | 0.0 | 0.2 | 0.0 | 0.0 | 0.0 | 0.0 | 0.0 | 0.0 | 0.0 | 0.0 |
| Olf93   | 0.0 | 0.0 | 0.0 | 0.0 | 0.0 | 0.0 | 0.0 | 0.0 | 0.0 | 0.0 | 0.0 | 0.0 |
| Olf943  | 0.1 | 0.0 | 0.0 | 0.0 | 0.0 | 0.0 | 0.0 | 0.0 | 0.0 | 0.0 | 0.0 | 0.0 |
| Olf97   | 0.0 | 0.0 | 0.0 | 0.0 | 0.0 | 0.0 | 0.0 | 0.0 | 0.0 | 0.0 | 0.0 | 0.0 |
| Olf971  | 0.0 | 0.0 | 0.0 | 0.0 | 0.0 | 0.0 | 0.0 | 0.0 | 0.0 | 0.0 | 0.0 | 0.0 |
| Olf98   | 0.0 | 0.0 | 0.0 | 0.0 | 0.0 | 0.0 | 0.0 | 0.0 | 0.0 | 0.0 | 0.0 | 0.0 |
| Olf982  | 0.0 | 0.0 | 0.0 | 0.0 | 0.0 | 0.0 | 0.0 | 0.0 | 0.0 | 0.0 | 0.0 | 0.0 |
| Olf988  | 0.0 | 0.0 | 0.0 | 0.0 | 0.0 | 0.0 | 0.0 | 0.0 | 0.0 | 0.0 | 0.0 | 0.0 |
| Olf994  | 0.0 | 0.1 | 0.0 | 0.0 | 0.0 | 0.0 | 0.0 | 0.0 | 0.0 | 0.0 | 0.0 | 0.0 |
| Olig2   | 0.0 | 0.0 | 0.0 | 0.0 | 0.0 | 0.0 | 0.0 | 0.0 | 0.0 | 0.0 | 0.0 | 0.0 |
| Olig3   | 0.0 | 0.0 | 0.0 | 0.0 | 0.0 | 0.0 | 0.0 | 0.0 | 0.0 | 0.0 | 0.0 | 0.0 |
| Oncut1  | 0.0 | 0.0 | 0.0 | 0.0 | 0.0 | 0.0 | 0.0 | 0.0 | 0.0 | 0.0 | 0.0 | 0.0 |
| Oncut3  | 0.0 | 0.0 | 0.0 | 0.0 | 0.0 | 0.0 | 0.0 | 0.0 | 0.0 | 0.0 | 0.0 | 0.0 |
| Oog1    | 0.0 | 0.0 | 0.0 | 0.0 | 0.0 | 0.0 | 0.0 | 0.0 | 0.0 | 0.0 | 0.0 | 0.0 |
| Oog2    | 0.0 | 0.0 | 0.0 | 0.0 | 0.0 | 0.0 | 0.0 | 0.0 | 0.0 | 0.0 | 0.0 | 0.0 |
| Oog3    | 0.0 | 0.0 | 0.0 | 0.0 | 0.0 | 0.0 | 0.0 | 0.0 | 0.0 | 0.0 | 0.0 | 0.0 |
| Oosp1   | 0.0 | 0.0 | 0.0 | 0.0 | 0.0 | 0.0 | 0.0 | 0.0 | 0.0 | 0.0 | 0.0 | 0.0 |
| Opalin  | 0.0 | 0.0 | 0.0 | 0.0 | 0.0 | 0.0 | 0.0 | 0.0 | 0.0 | 0.0 | 0.0 | 0.1 |
| Opn4    | 0.0 | 0.0 | 0.0 | 0.0 | 0.0 | 0.0 | 0.0 | 0.0 | 0.0 | 0.0 | 0.0 | 0.0 |
| Oprd1   | 0.0 | 0.0 | 0.0 | 0.0 | 0.0 | 0.0 | 0.0 | 0.0 | 0.0 | 0.0 | 0.0 | 0.0 |
| Oprk1   | 0.0 | 0.0 | 0.0 | 0.0 | 0.0 | 0.0 | 0.0 | 0.0 | 0.0 | 0.0 | 0.0 | 0.0 |
| Oprm1   | 0.0 | 0.0 | 0.0 | 0.0 | 0.0 | 0.0 | 0.0 | 0.0 | 0.0 | 0.0 | 0.0 | 0.0 |
| Otc     | 0.0 | 0.0 | 0.0 | 0.0 | 0.0 | 0.0 | 0.0 | 0.0 | 0.0 | 0.0 | 0.0 | 0.0 |
| Otog    | 0.0 | 0.0 | 0.0 | 0.0 | 0.0 | 0.0 | 0.0 | 0.0 | 0.0 | 0.0 | 0.0 | 0.0 |
| Otop1   | 0.0 | 0.0 | 0.0 | 0.0 | 0.0 | 0.0 | 0.0 | 0.0 | 0.0 | 0.0 | 0.0 | 0.0 |
| Otop2   | 0.0 | 0.0 | 0.0 | 0.0 | 0.0 | 0.0 | 0.0 | 0.0 | 0.0 | 0.0 | 0.0 | 0.0 |
| Otos    | 0.1 | 0.0 | 0.0 | 0.0 | 0.0 | 0.0 | 0.0 | 0.0 | 0.0 | 0.0 | 0.0 | 0.0 |
| Otud6a  | 0.0 | 0.0 | 0.0 | 0.0 | 0.0 | 0.0 | 0.0 | 0.0 | 0.0 | 0.0 | 0.0 | 0.0 |
| Otx1    | 0.0 | 0.0 | 0.0 | 0.0 | 0.0 | 0.0 | 0.0 | 0.0 | 0.0 | 0.0 | 0.0 | 0.0 |
| Ovch2   | 0.1 | 0.0 | 0.0 | 0.0 | 0.0 | 0.0 | 0.0 | 0.0 | 0.0 | 0.0 | 0.0 | 0.0 |
| Ovol2   | 0.0 | 0.0 | 0.0 | 0.0 | 0.0 | 0.0 | 0.0 | 0.0 | 0.0 | 0.0 | 0.0 | 0.0 |
| Oxct2b  | 0.0 | 0.0 | 0.0 | 0.0 | 0.0 | 0.0 | 0.0 | 0.0 | 0.0 | 0.0 | 0.0 | 0.0 |
| Oxgr1   | 0.0 | 0.0 | 0.0 | 0.0 | 0.0 | 0.0 | 0.0 | 0.0 | 0.0 | 0.0 | 0.0 | 0.0 |
| P2rx2   | 0.0 | 0.0 | 0.0 | 0.0 | 0.0 | 0.0 | 0.1 | 0.0 | 0.0 | 0.0 | 0.0 | 0.1 |
| P2ry10  | 0.0 | 0.0 | 0.0 | 0.0 | 0.0 | 0.0 | 0.0 | 0.0 | 0.0 | 0.0 | 0.0 | 0.0 |
| Pabpc2  | 0.0 | 0.0 | 0.0 | 0.0 | 0.0 | 0.0 | 0.0 | 0.0 | 0.0 | 0.0 | 0.0 | 0.0 |
| Pabpn1l | 0.0 | 0.0 | 0.0 | 0.0 | 0.0 | 0.0 | 0.0 | 0.0 | 0.0 | 0.0 | 0.0 | 0.0 |
| Padi6   | 0.0 | 0.0 | 0.0 | 0.0 | 0.0 | 0.0 | 0.0 | 0.0 | 0.0 | 0.0 | 0.0 | 0.0 |
| Pah     | 0.0 | 0.0 | 0.0 | 0.0 | 0.0 | 0.0 | 0.0 | 0.0 | 0.0 | 0.0 | 0.0 | 0.0 |
| Panx3   | 0.0 | 0.0 | 0.0 | 0.0 | 0.0 | 0.0 | 0.0 | 0.0 | 0.0 | 0.0 | 0.0 | 0.0 |
| Pate4   | 0.0 | 0.0 | 0.0 | 0.0 | 0.0 | 0.0 | 0.0 | 0.0 | 0.0 | 0.0 | 0.0 | 0.0 |
| Pax1    | 0.0 | 0.0 | 0.0 | 0.0 | 0.0 | 0.0 | 0.0 | 0.0 | 0.0 | 0.0 | 0.0 | 0.0 |
| Pax4    | 0.1 | 0.0 | 0.0 | 0.0 | 0.0 | 0.0 | 0.0 | 0.0 | 0.0 | 0.0 | 0.0 | 0.0 |
| Pax5    | 0.0 | 0.0 | 0.0 | 0.0 | 0.1 | 0.0 | 0.0 | 0.0 | 0.0 | 0.0 | 0.0 | 0.0 |
| Pax6os1 | 0.0 | 0.0 | 0.0 | 0.0 | 0.0 | 0.0 | 0.0 | 0.0 | 0.0 | 0.0 | 0.0 | 0.0 |

Excluded Genes

|          |     |     |     |     |     |     |     |     |     |     |     |     |
|----------|-----|-----|-----|-----|-----|-----|-----|-----|-----|-----|-----|-----|
| Pax7     | 0.0 | 0.0 | 0.0 | 0.0 | 0.0 | 0.0 | 0.0 | 0.0 | 0.0 | 0.0 | 0.0 | 0.0 |
| Pax8     | 0.0 | 0.0 | 0.0 | 0.0 | 0.0 | 0.0 | 0.0 | 0.0 | 0.0 | 0.0 | 0.0 | 0.0 |
| Pcdhb1   | 0.0 | 0.0 | 0.0 | 0.0 | 0.0 | 0.0 | 0.0 | 0.0 | 0.0 | 0.0 | 0.0 | 0.0 |
| Pcdhb6   | 0.0 | 0.0 | 0.0 | 0.0 | 0.0 | 0.1 | 0.0 | 0.0 | 0.0 | 0.0 | 0.0 | 0.0 |
| Pcsk1n   | 0.0 | 0.0 | 0.0 | 0.0 | 0.0 | 0.0 | 0.0 | 0.0 | 0.0 | 0.0 | 0.0 | 0.0 |
| Pdcd1    | 0.0 | 0.0 | 0.0 | 0.0 | 0.0 | 0.0 | 0.0 | 0.0 | 0.0 | 0.0 | 0.0 | 0.0 |
| Pdcd1lg2 | 0.0 | 0.0 | 0.0 | 0.0 | 0.0 | 0.0 | 0.0 | 0.0 | 0.0 | 0.0 | 0.0 | 0.0 |
| Pdcl2    | 0.0 | 0.0 | 0.0 | 0.0 | 0.0 | 0.0 | 0.0 | 0.0 | 0.0 | 0.0 | 0.0 | 0.0 |
| Pde6c    | 0.0 | 0.0 | 0.0 | 0.0 | 0.0 | 0.0 | 0.0 | 0.0 | 0.0 | 0.0 | 0.0 | 0.0 |
| Pdyn     | 0.0 | 0.0 | 0.0 | 0.0 | 0.0 | 0.0 | 0.1 | 0.0 | 0.0 | 0.0 | 0.0 | 0.0 |
| Pea15b   | 0.0 | 0.0 | 0.0 | 0.0 | 0.0 | 0.0 | 0.0 | 0.0 | 0.0 | 0.0 | 0.0 | 0.0 |
| Pebp4    | 0.0 | 0.1 | 0.0 | 0.0 | 0.0 | 0.0 | 0.0 | 0.0 | 0.0 | 0.0 | 0.0 | 0.0 |
| Penk     | 0.0 | 0.0 | 0.0 | 0.0 | 0.0 | 0.1 | 0.0 | 0.0 | 0.0 | 0.0 | 0.0 | 0.1 |
| Pfpl     | 0.0 | 0.0 | 0.0 | 0.0 | 0.0 | 0.0 | 0.0 | 0.0 | 0.0 | 0.0 | 0.0 | 0.0 |
| Pga5     | 0.0 | 0.0 | 0.0 | 0.0 | 0.0 | 0.0 | 0.0 | 0.1 | 0.0 | 0.0 | 0.1 | 0.0 |
| Pglyrp2  | 0.0 | 0.0 | 0.0 | 0.0 | 0.0 | 0.0 | 0.0 | 0.0 | 0.0 | 0.0 | 0.0 | 0.0 |
| Pglyrp4  | 0.0 | 0.0 | 0.0 | 0.0 | 0.0 | 0.0 | 0.0 | 0.0 | 0.0 | 0.0 | 0.0 | 0.0 |
| Phgr1    | 0.1 | 0.0 | 0.0 | 0.0 | 0.1 | 0.0 | 0.0 | 0.0 | 0.0 | 0.0 | 0.3 | 0.0 |
| Pigr     | 0.0 | 0.0 | 0.0 | 0.0 | 0.0 | 0.0 | 0.0 | 0.0 | 0.0 | 0.0 | 0.0 | 0.0 |
| Pik3c2g  | 0.0 | 0.0 | 0.0 | 0.0 | 0.0 | 0.0 | 0.0 | 0.0 | 0.0 | 0.0 | 0.0 | 0.0 |
| Pinlyp   | 0.0 | 0.0 | 0.0 | 0.0 | 0.1 | 0.0 | 0.0 | 0.0 | 0.1 | 0.1 | 0.0 | 0.0 |
| Pip5kl1  | 0.0 | 0.0 | 0.0 | 0.0 | 0.0 | 0.0 | 0.0 | 0.0 | 0.0 | 0.1 | 0.0 | 0.0 |
| Pirt     | 0.0 | 0.0 | 0.0 | 0.0 | 0.0 | 0.0 | 0.0 | 0.0 | 0.0 | 0.0 | 0.0 | 0.0 |
| Pitx3    | 0.0 | 0.0 | 0.0 | 0.0 | 0.0 | 0.0 | 0.0 | 0.0 | 0.0 | 0.0 | 0.0 | 0.0 |
| Piwil1   | 0.0 | 0.0 | 0.0 | 0.0 | 0.0 | 0.0 | 0.0 | 0.0 | 0.0 | 0.0 | 0.0 | 0.0 |
| Pkd2l1   | 0.0 | 0.0 | 0.0 | 0.0 | 0.0 | 0.0 | 0.0 | 0.0 | 0.0 | 0.0 | 0.0 | 0.0 |
| Pklr     | 0.0 | 0.0 | 0.0 | 0.0 | 0.0 | 0.0 | 0.0 | 0.0 | 0.0 | 0.0 | 0.0 | 0.0 |
| Pla2g10  | 0.0 | 0.1 | 0.0 | 0.0 | 0.0 | 0.0 | 0.0 | 0.0 | 0.0 | 0.0 | 0.0 | 0.0 |
| Pla2g12b | 0.0 | 0.0 | 0.0 | 0.0 | 0.0 | 0.0 | 0.0 | 0.0 | 0.0 | 0.0 | 0.0 | 0.0 |
| Pla2g1b  | 0.0 | 0.0 | 0.0 | 0.0 | 0.0 | 0.0 | 0.1 | 0.0 | 0.0 | 0.0 | 0.0 | 0.0 |
| Pla2g2d  | 0.0 | 0.0 | 0.0 | 0.0 | 0.0 | 0.0 | 0.0 | 0.0 | 0.0 | 0.0 | 0.0 | 0.0 |
| Pla2g4e  | 0.0 | 0.0 | 0.0 | 0.0 | 0.0 | 0.0 | 0.0 | 0.0 | 0.0 | 0.0 | 0.0 | 0.0 |
| Plac1    | 0.0 | 0.0 | 0.1 | 0.0 | 0.0 | 0.0 | 0.1 | 0.0 | 0.0 | 0.0 | 0.0 | 0.0 |
| Plac8l1  | 0.0 | 0.0 | 0.0 | 0.0 | 0.0 | 0.1 | 0.0 | 0.0 | 0.0 | 0.0 | 0.0 | 0.0 |
| Plcz1    | 0.0 | 0.0 | 0.0 | 0.1 | 0.0 | 0.0 | 0.0 | 0.0 | 0.0 | 0.0 | 0.0 | 0.0 |
| Pld5     | 0.0 | 0.0 | 0.0 | 0.0 | 0.0 | 0.0 | 0.0 | 0.0 | 0.0 | 0.0 | 0.0 | 0.0 |
| Plscr5   | 0.1 | 0.0 | 0.0 | 0.0 | 0.0 | 0.0 | 0.0 | 0.0 | 0.0 | 0.0 | 0.0 | 0.0 |
| Pmch     | 0.0 | 0.0 | 0.0 | 0.0 | 0.1 | 0.0 | 0.0 | 0.1 | 0.1 | 0.0 | 0.0 | 0.0 |
| Pmfbbp1  | 0.0 | 0.0 | 0.0 | 0.0 | 0.0 | 0.0 | 0.0 | 0.0 | 0.0 | 0.0 | 0.0 | 0.0 |
| Pnlip    | 0.0 | 0.0 | 0.0 | 0.0 | 0.0 | 0.0 | 0.0 | 0.0 | 0.0 | 0.0 | 0.0 | 0.0 |
| Pnliprp1 | 0.0 | 0.0 | 0.0 | 0.0 | 0.0 | 0.0 | 0.0 | 0.0 | 0.0 | 0.0 | 0.0 | 0.0 |
| Pnliprp2 | 0.0 | 0.0 | 0.1 | 0.0 | 0.1 | 0.0 | 0.1 | 0.0 | 0.0 | 0.0 | 0.0 | 0.0 |
| Pnma3    | 0.0 | 0.0 | 0.0 | 0.0 | 0.0 | 0.0 | 0.0 | 0.0 | 0.0 | 0.0 | 0.0 | 0.0 |
| Pnma5    | 0.0 | 0.0 | 0.0 | 0.0 | 0.1 | 0.0 | 0.0 | 0.0 | 0.0 | 0.0 | 0.0 | 0.0 |
| Pnmal1   | 0.0 | 0.0 | 0.0 | 0.0 | 0.0 | 0.0 | 0.0 | 0.0 | 0.0 | 0.0 | 0.0 | 0.0 |
| Pnmt     | 0.0 | 0.0 | 0.0 | 0.0 | 0.0 | 0.0 | 0.0 | 0.0 | 0.0 | 0.1 | 0.0 | 0.0 |
| Pnoc     | 0.0 | 0.0 | 0.0 | 0.0 | 0.0 | 0.0 | 0.0 | 0.0 | 0.0 | 0.1 | 0.0 | 0.0 |
| Pof1b    | 0.0 | 0.0 | 0.0 | 0.0 | 0.0 | 0.0 | 0.0 | 0.0 | 0.0 | 0.0 | 0.0 | 0.0 |
| Pou2af1  | 0.0 | 0.0 | 0.0 | 0.0 | 0.0 | 0.0 | 0.0 | 0.0 | 0.0 | 0.0 | 0.0 | 0.0 |
| Pou3f2   | 0.0 | 0.0 | 0.0 | 0.0 | 0.0 | 0.0 | 0.0 | 0.0 | 0.0 | 0.0 | 0.0 | 0.0 |
| Pou4f3   | 0.0 | 0.0 | 0.0 | 0.0 | 0.0 | 0.0 | 0.0 | 0.0 | 0.0 | 0.0 | 0.0 | 0.0 |
| Pou6f2   | 0.0 | 0.0 | 0.0 | 0.0 | 0.0 | 0.0 | 0.0 | 0.0 | 0.0 | 0.0 | 0.0 | 0.0 |
| Ppapdc1a | 0.0 | 0.0 | 0.0 | 0.0 | 0.0 | 0.0 | 0.0 | 0.0 | 0.0 | 0.0 | 0.1 | 0.0 |
| Ppbbp    | 0.0 | 0.0 | 0.0 | 0.1 | 0.0 | 0.0 | 0.0 | 0.0 | 0.0 | 0.0 | 0.0 | 0.0 |
| Ppm1n    | 0.0 | 0.0 | 0.0 | 0.0 | 0.0 | 0.0 | 0.1 | 0.0 | 0.0 | 0.0 | 0.0 | 0.0 |
| Ppp1r17  | 0.0 | 0.0 | 0.0 | 0.0 | 0.0 | 0.0 | 0.0 | 0.0 | 0.0 | 0.0 | 0.0 | 0.0 |
| Ppp1r3g  | 0.0 | 0.0 | 0.0 | 0.0 | 0.0 | 0.0 | 0.0 | 0.0 | 0.0 | 0.0 | 0.0 | 0.0 |

Excluded Genes

|          |     |     |     |     |     |     |     |     |     |     |     |     |
|----------|-----|-----|-----|-----|-----|-----|-----|-----|-----|-----|-----|-----|
| Ppp1r42  | 0.0 | 0.0 | 0.2 | 0.0 | 0.1 | 0.0 | 0.0 | 0.0 | 0.0 | 0.0 | 0.0 | 0.0 |
| Pramef17 | 0.0 | 0.0 | 0.1 | 0.0 | 0.0 | 0.0 | 0.0 | 0.0 | 0.0 | 0.0 | 0.0 | 0.0 |
| Prdm12   | 0.0 | 0.0 | 0.0 | 0.0 | 0.0 | 0.0 | 0.0 | 0.0 | 0.0 | 0.0 | 0.0 | 0.0 |
| Prdm13   | 0.0 | 0.0 | 0.0 | 0.0 | 0.0 | 0.0 | 0.0 | 0.0 | 0.0 | 0.0 | 0.0 | 0.0 |
| Prdm14   | 0.0 | 0.0 | 0.0 | 0.0 | 0.0 | 0.0 | 0.0 | 0.0 | 0.0 | 0.0 | 0.0 | 0.0 |
| Prf1     | 0.0 | 0.0 | 0.0 | 0.0 | 0.0 | 0.0 | 0.0 | 0.0 | 0.0 | 0.0 | 0.0 | 0.0 |
| Prima1   | 0.0 | 0.1 | 0.0 | 0.0 | 0.0 | 0.0 | 0.0 | 0.0 | 0.0 | 0.0 | 0.0 | 0.0 |
| Pri2a1   | 0.0 | 0.0 | 0.0 | 0.0 | 0.0 | 0.1 | 0.0 | 0.0 | 0.0 | 0.0 | 0.0 | 0.0 |
| Pri2b1   | 0.0 | 0.1 | 0.0 | 0.0 | 0.0 | 0.0 | 0.0 | 0.0 | 0.0 | 0.0 | 0.0 | 0.0 |
| Pri2c1   | 0.0 | 0.0 | 0.0 | 0.0 | 0.0 | 0.0 | 0.0 | 0.0 | 0.0 | 0.0 | 0.0 | 0.0 |
| Pri3d1   | 0.0 | 0.1 | 0.0 | 0.0 | 0.0 | 0.0 | 0.0 | 0.0 | 0.0 | 0.1 | 0.0 | 0.0 |
| Pri3d2   | 0.0 | 0.0 | 0.0 | 0.0 | 0.0 | 0.0 | 0.1 | 0.1 | 0.0 | 0.2 | 0.0 | 0.0 |
| Pri3d3   | 0.0 | 0.0 | 0.0 | 0.0 | 0.0 | 0.0 | 0.0 | 0.0 | 0.0 | 0.0 | 0.0 | 0.0 |
| Pri4a1   | 0.0 | 0.0 | 0.0 | 0.0 | 0.0 | 0.0 | 0.0 | 0.0 | 0.0 | 0.0 | 0.0 | 0.0 |
| Pri6a1   | 0.0 | 0.0 | 0.0 | 0.1 | 0.0 | 0.0 | 0.0 | 0.0 | 0.0 | 0.0 | 0.0 | 0.0 |
| Pri8a2   | 0.0 | 0.0 | 0.0 | 0.0 | 0.0 | 0.0 | 0.0 | 0.0 | 0.0 | 0.0 | 0.0 | 0.0 |
| Prih     | 0.3 | 0.0 | 0.0 | 0.0 | 0.0 | 0.0 | 0.0 | 0.0 | 0.0 | 0.0 | 0.0 | 0.0 |
| Prihr    | 0.0 | 0.1 | 0.0 | 0.0 | 0.0 | 0.0 | 0.0 | 0.0 | 0.0 | 0.0 | 0.0 | 0.0 |
| Prm1     | 0.0 | 0.0 | 0.0 | 0.0 | 0.0 | 0.0 | 0.0 | 0.0 | 0.0 | 0.1 | 0.0 | 0.0 |
| Prm2     | 0.0 | 0.0 | 0.0 | 0.0 | 0.0 | 0.0 | 0.0 | 0.1 | 0.0 | 0.0 | 0.0 | 0.0 |
| Prmt8    | 0.0 | 0.0 | 0.0 | 0.0 | 0.0 | 0.0 | 0.0 | 0.0 | 0.0 | 0.0 | 0.0 | 0.0 |
| Proc     | 0.0 | 0.0 | 0.0 | 0.0 | 0.0 | 0.0 | 0.0 | 0.0 | 0.0 | 0.0 | 0.0 | 0.0 |
| Prok2    | 0.0 | 0.0 | 0.0 | 0.0 | 0.0 | 0.0 | 0.0 | 0.0 | 0.0 | 0.0 | 0.0 | 0.0 |
| Prom2    | 0.0 | 0.0 | 0.0 | 0.0 | 0.0 | 0.0 | 0.0 | 0.0 | 0.0 | 0.0 | 0.0 | 0.0 |
| Prp2     | 0.0 | 0.0 | 0.0 | 0.0 | 0.0 | 0.0 | 0.0 | 0.0 | 0.0 | 0.0 | 0.0 | 0.0 |
| Prps1l1  | 0.0 | 0.1 | 0.0 | 0.0 | 0.0 | 0.0 | 0.0 | 0.1 | 0.0 | 0.0 | 0.0 | 0.0 |
| Prr19    | 0.0 | 0.0 | 0.0 | 0.0 | 0.0 | 0.0 | 0.0 | 0.0 | 0.0 | 0.0 | 0.0 | 0.0 |
| Prr9     | 0.0 | 0.0 | 0.0 | 0.0 | 0.0 | 0.1 | 0.0 | 0.0 | 0.0 | 0.0 | 0.1 | 0.0 |
| Prrxl1   | 0.0 | 0.0 | 0.0 | 0.0 | 0.0 | 0.0 | 0.0 | 0.0 | 0.0 | 0.0 | 0.0 | 0.0 |
| Prss2    | 0.0 | 0.1 | 0.0 | 0.0 | 0.0 | 0.0 | 0.0 | 0.0 | 0.0 | 0.0 | 0.1 | 0.1 |
| Prss22   | 0.0 | 0.1 | 0.0 | 0.0 | 0.0 | 0.0 | 0.0 | 0.0 | 0.0 | 0.0 | 0.0 | 0.0 |
| Prss32   | 0.0 | 0.0 | 0.0 | 0.0 | 0.0 | 0.0 | 0.0 | 0.0 | 0.0 | 0.0 | 0.0 | 0.0 |
| Prss34   | 0.0 | 0.0 | 0.0 | 0.0 | 0.0 | 0.0 | 0.0 | 0.0 | 0.0 | 0.0 | 0.0 | 0.0 |
| Prss37   | 0.0 | 0.0 | 0.0 | 0.0 | 0.0 | 0.0 | 0.1 | 0.0 | 0.0 | 0.0 | 0.1 | 0.0 |
| Prss38   | 0.0 | 0.0 | 0.0 | 0.0 | 0.0 | 0.1 | 0.0 | 0.0 | 0.0 | 0.0 | 0.0 | 0.0 |
| Prss39   | 0.0 | 0.0 | 0.0 | 0.0 | 0.0 | 0.0 | 0.1 | 0.0 | 0.0 | 0.0 | 0.0 | 0.0 |
| Prss41   | 0.0 | 0.0 | 0.1 | 0.0 | 0.0 | 0.0 | 0.0 | 0.0 | 0.0 | 0.0 | 0.0 | 0.0 |
| Prss42   | 0.0 | 0.0 | 0.0 | 0.0 | 0.0 | 0.0 | 0.0 | 0.0 | 0.0 | 0.0 | 0.0 | 0.0 |
| Prss43   | 0.0 | 0.0 | 0.0 | 0.0 | 0.0 | 0.0 | 0.0 | 0.0 | 0.0 | 0.0 | 0.0 | 0.0 |
| Prss51   | 0.0 | 0.0 | 0.0 | 0.0 | 0.0 | 0.0 | 0.0 | 0.0 | 0.0 | 0.0 | 0.0 | 0.0 |
| Prss52   | 0.1 | 0.0 | 0.0 | 0.0 | 0.0 | 0.0 | 0.0 | 0.0 | 0.0 | 0.0 | 0.0 | 0.0 |
| Prss54   | 0.0 | 0.0 | 0.0 | 0.0 | 0.0 | 0.0 | 0.0 | 0.0 | 0.0 | 0.0 | 0.0 | 0.0 |
| Prss55   | 0.0 | 0.0 | 0.0 | 0.0 | 0.0 | 0.0 | 0.0 | 0.0 | 0.0 | 0.0 | 0.0 | 0.0 |
| Prss56   | 0.0 | 0.0 | 0.0 | 0.0 | 0.0 | 0.0 | 0.1 | 0.0 | 0.0 | 0.0 | 0.1 | 0.0 |
| Prss58   | 0.0 | 0.0 | 0.0 | 0.1 | 0.0 | 0.0 | 0.0 | 0.0 | 0.0 | 0.0 | 0.0 | 0.0 |
| Psapl1   | 0.0 | 0.0 | 0.0 | 0.0 | 0.0 | 0.0 | 0.0 | 0.0 | 0.0 | 0.0 | 0.0 | 0.0 |
| Pzca     | 0.0 | 0.0 | 0.0 | 0.0 | 0.0 | 0.0 | 0.0 | 0.0 | 0.0 | 0.0 | 0.0 | 0.0 |
| Psg16    | 0.1 | 0.0 | 0.0 | 0.0 | 0.0 | 0.0 | 0.0 | 0.0 | 0.0 | 0.0 | 0.0 | 0.0 |
| Psg19    | 0.0 | 0.0 | 0.0 | 0.1 | 0.0 | 0.0 | 0.0 | 0.0 | 0.0 | 0.0 | 0.0 | 0.0 |
| Psg21    | 0.0 | 0.0 | 0.0 | 0.0 | 0.0 | 0.0 | 0.0 | 0.0 | 0.0 | 0.0 | 0.0 | 0.0 |
| Psg22    | 0.0 | 0.0 | 0.0 | 0.0 | 0.0 | 0.0 | 0.0 | 0.0 | 0.0 | 0.0 | 0.0 | 0.0 |
| Psg28    | 0.0 | 0.0 | 0.0 | 0.0 | 0.0 | 0.0 | 0.0 | 0.0 | 0.0 | 0.0 | 0.0 | 0.0 |
| Psors1c2 | 0.0 | 0.1 | 0.0 | 0.0 | 0.0 | 0.0 | 0.0 | 0.1 | 0.0 | 0.0 | 0.0 | 0.0 |
| Ptgdr    | 0.0 | 0.0 | 0.0 | 0.0 | 0.0 | 0.0 | 0.0 | 0.0 | 0.0 | 0.0 | 0.0 | 0.0 |
| Ptk6     | 0.0 | 0.0 | 0.0 | 0.0 | 0.0 | 0.0 | 0.0 | 0.0 | 0.0 | 0.0 | 0.0 | 0.0 |
| Ptpn20   | 0.0 | 0.0 | 0.0 | 0.0 | 0.0 | 0.0 | 0.0 | 0.0 | 0.0 | 0.0 | 0.0 | 0.0 |
| Ptprh    | 0.0 | 0.0 | 0.0 | 0.0 | 0.0 | 0.0 | 0.0 | 0.0 | 0.0 | 0.0 | 0.0 | 0.0 |

Excluded Genes



|          |     |     |     |     |     |       |       |     |     |     |       |       |
|----------|-----|-----|-----|-----|-----|-------|-------|-----|-----|-----|-------|-------|
| Ptpr     | 0.0 | 0.0 | 0.0 | 0.0 | 0.0 | 0.0   | 0.0   | 0.0 | 0.0 | 0.0 | 0.0   | 0.0   |
| Ptx4     | 0.0 | 0.0 | 0.0 | 0.0 | 0.0 | 0.0   | 0.0   | 0.0 | 0.0 | 0.0 | 0.0   | 0.0   |
| Pxt1     | 0.0 | 0.0 | 0.0 | 0.0 | 0.0 | 0.0   | 0.0   | 0.0 | 0.0 | 0.0 | 0.0   | 0.0   |
| Pydc4    | 0.0 | 0.0 | 0.0 | 0.0 | 0.0 | 0.0   | 0.0   | 0.0 | 0.0 | 0.0 | 0.0   | 0.0   |
| Pzp      | 0.0 | 0.0 | 0.0 | 0.0 | 0.0 | 0.0   | 0.0   | 0.0 | 0.0 | 0.0 | 0.0   | 0.0   |
| Qprt     | 0.1 | 0.0 | 0.0 | 0.0 | 0.1 | 0.0   | 0.1   | 0.0 | 0.0 | 0.0 | 0.1   | 0.0   |
| Orfpr    | 0.0 | 0.0 | 0.0 | 0.0 | 0.0 | 0.0   | 0.0   | 0.0 | 0.0 | 0.0 | 0.0   | 0.0   |
| R3hdml   | 0.0 | 0.0 | 0.1 | 0.0 | 0.0 | 0.0   | 0.0   | 0.0 | 0.0 | 0.0 | 0.0   | 0.0   |
| Rab17    | 0.1 | 0.0 | 0.0 | 0.0 | 0.0 | 0.0   | 0.0   | 0.0 | 0.0 | 0.0 | 0.0   | 0.0   |
| Rab9b    | 0.0 | 0.0 | 0.0 | 0.0 | 0.0 | 0.0   | 0.0   | 0.0 | 0.0 | 0.0 | 0.0   | 0.0   |
| Rad51ap2 | 0.0 | 0.0 | 0.0 | 0.0 | 0.0 | 0.0   | 0.0   | 0.0 | 0.0 | 0.0 | 0.0   | 0.0   |
| Rag1     | 0.0 | 0.0 | 0.0 | 0.0 | 0.0 | 0.0   | 0.0   | 0.0 | 0.0 | 0.0 | 0.0   | 0.0   |
| Rag2     | 0.0 | 0.0 | 0.0 | 0.0 | 0.0 | 0.0   | 0.0   | 0.0 | 0.0 | 0.0 | 0.0   | 0.0   |
| Raly1    | 0.0 | 0.0 | 0.0 | 0.0 | 0.0 | 0.0   | 0.0   | 0.0 | 0.0 | 0.0 | 0.1   | 0.0   |
| Rasgrf1  | 0.0 | 0.0 | 0.0 | 0.0 | 0.0 | 0.0   | 0.0   | 0.0 | 0.0 | 0.0 | 0.0   | 0.0   |
| Rbbp8nl  | 0.0 | 0.0 | 0.0 | 0.0 | 0.0 | 0.0   | 0.0   | 0.0 | 0.0 | 0.0 | 0.0   | 0.0   |
| Rbmy     | 0.0 | 0.0 | 0.0 | 0.0 | 0.0 | 0.0   | 0.0   | 0.0 | 0.0 | 0.0 | 0.0   | 0.0   |
| Rbp2     | 0.0 | 0.0 | 0.0 | 0.0 | 0.0 | 0.0   | 0.0   | 0.0 | 0.1 | 0.0 | 0.0   | 0.0   |
| Rbp3     | 0.0 | 0.0 | 0.0 | 0.0 | 0.0 | 0.0   | 0.0   | 0.0 | 0.0 | 0.0 | 0.0   | 0.0   |
| Rbp7     | 0.0 | 0.0 | 0.0 | 0.0 | 0.1 | 0.0   | 0.0   | 0.0 | 0.0 | 0.2 | 0.0   | 0.0   |
| Rdh18-ps | 0.0 | 0.0 | 0.0 | 0.0 | 0.0 | 0.0   | 0.0   | 0.0 | 0.0 | 0.0 | 0.0   | 0.0   |
| Rdh7     | 0.0 | 0.0 | 0.0 | 0.0 | 0.0 | 0.0   | 0.0   | 0.0 | 0.0 | 0.0 | 0.0   | 0.0   |
| Rdh8     | 0.0 | 0.0 | 0.0 | 0.1 | 0.0 | 0.0   | 0.0   | 0.0 | 0.0 | 0.0 | 0.0   | 0.0   |
| Reg3b    | 0.3 | 0.0 | 0.0 | 0.0 | 0.0 | 0.0   | 0.0   | 0.0 | 0.0 | 0.0 | 0.0   | 0.0   |
| Resp18   | 0.1 | 0.0 | 0.0 | 0.0 | 0.0 | 0.0   | 0.0   | 0.0 | 0.0 | 0.0 | 0.0   | 0.0   |
| Retn     | 0.0 | 0.0 | 0.1 | 0.0 | 0.0 | 0.1   | 0.0   | 0.0 | 0.0 | 0.0 | 0.0   | 0.0   |
| Retnla   | 0.1 | 0.0 | 0.0 | 0.0 | 0.0 | 0.1   | 0.0   | 0.0 | 0.0 | 0.0 | 0.0   | 0.0   |
| Rfpl3s   | 0.0 | 0.1 | 0.0 | 0.0 | 0.0 | 0.0   | 0.0   | 0.0 | 0.0 | 0.0 | 0.0   | 0.0   |
| Rfpl4    | 0.0 | 0.0 | 0.0 | 0.0 | 0.0 | 0.0   | 0.1   | 0.0 | 0.0 | 0.0 | 0.0   | 0.0   |
| Rfx4     | 0.0 | 0.0 | 0.0 | 0.0 | 0.0 | 0.0   | 0.0   | 0.0 | 0.0 | 0.0 | 0.0   | 0.0   |
| Rfx6     | 0.0 | 0.0 | 0.0 | 0.0 | 0.0 | 0.0   | 0.0   | 0.0 | 0.0 | 0.0 | 0.0   | 0.0   |
| Rhbg     | 0.0 | 0.0 | 0.0 | 0.0 | 0.0 | 0.0   | 0.0   | 0.0 | 0.0 | 0.0 | 0.0   | 0.0   |
| Rhcg     | 0.0 | 0.0 | 0.0 | 0.0 | 0.0 | 0.0   | 0.0   | 0.0 | 0.0 | 0.0 | 0.0   | 0.0   |
| Rhox2a   | 0.0 | 0.0 | 0.0 | 0.0 | 0.0 | 0.0   | 0.0   | 0.0 | 0.0 | 0.0 | 0.0   | 0.0   |
| Rhox2b   | 0.0 | 0.0 | 0.0 | 0.0 | 0.0 | 0.0   | 0.0   | 0.0 | 0.0 | 0.0 | 0.0   | 0.0   |
| Rhox2c   | 0.0 | 0.0 | 0.0 | 0.0 | 0.0 | 0.0   | 0.0   | 0.0 | 0.0 | 0.0 | 0.0   | 0.0   |
| Rhox2d   | 0.0 | 0.0 | 0.0 | 0.0 | 0.0 | 0.0   | 0.0   | 0.0 | 0.0 | 0.0 | 0.0   | 0.0   |
| Rhox2e   | 0.0 | 0.0 | 0.0 | 0.0 | 0.0 | 0.0   | 0.0   | 0.0 | 0.0 | 0.0 | 0.0   | 0.0   |
| Rhox2h   | 0.0 | 0.0 | 0.0 | 0.0 | 0.0 | 0.0   | 0.0   | 0.0 | 0.0 | 0.0 | 0.0   | 0.0   |
| Rhox3a   | 0.0 | 0.0 | 0.0 | 0.0 | 0.0 | 0.0   | 0.0   | 0.0 | 0.0 | 0.0 | 0.0   | 0.0   |
| Rhox3c   | 0.0 | 0.0 | 0.0 | 0.0 | 0.0 | 0.0   | 0.0   | 0.0 | 0.0 | 0.0 | 0.0   | 0.0   |
| Rhox3e   | 0.0 | 0.0 | 0.0 | 0.0 | 0.0 | 0.0   | 0.0   | 0.0 | 0.0 | 0.0 | 0.0   | 0.0   |
| Rhox3f   | 0.0 | 0.0 | 0.0 | 0.0 | 0.0 | 0.0   | 0.0   | 0.0 | 0.0 | 0.0 | 0.0   | 0.0   |
| Rhox3h   | 0.0 | 0.0 | 0.0 | 0.0 | 0.0 | 0.0   | 0.0   | 0.0 | 0.0 | 0.0 | 0.0   | 0.0   |
| Rhox7    | 0.0 | 0.0 | 0.1 | 0.1 | 0.1 | 0.0   | 0.1   | 0.2 | 0.0 | 0.0 | 0.0   | 0.1   |
| Rhox8    | 0.0 | 0.0 | 0.0 | 0.0 | 0.0 | 0.0   | 0.0   | 0.0 | 0.1 | 0.1 | 0.0   | 0.0   |
| Rimbp2   | 0.0 | 0.0 | 0.0 | 0.0 | 0.0 | 0.0   | 0.0   | 0.0 | 0.0 | 0.0 | 0.0   | 0.0   |
| Ripply1  | 0.0 | 0.0 | 0.0 | 0.0 | 0.0 | 0.0   | 0.0   | 0.0 | 0.0 | 0.0 | 0.0   | 0.0   |
| Rlbp1    | 0.0 | 0.0 | 0.0 | 0.0 | 0.0 | 0.0   | 0.0   | 0.0 | 0.0 | 0.0 | 0.0   | 0.0   |
| Rmst     | 0.0 | 0.0 | 0.0 | 0.0 | 0.0 | 0.0   | 0.0   | 0.0 | 0.0 | 0.0 | 0.0   | 0.0   |
| Rnf133   | 0.0 | 0.0 | 0.0 | 0.0 | 0.0 | 0.0   | 0.0   | 0.0 | 0.0 | 0.0 | 0.0   | 0.0   |
| Rnf186   | 0.0 | 0.0 | 0.0 | 0.0 | 0.0 | 0.0   | 0.0   | 0.0 | 0.0 | 0.0 | 0.0   | 0.0   |
| Rnu6     | 0.0 | 0.0 | 0.0 | 0.0 | 0.0 | ##### | ##### | 0.0 | 0.0 | 0.0 | ##### | ##### |
| Ros1     | 0.0 | 0.0 | 0.0 | 0.0 | 0.0 | 0.0   | 0.0   | 0.0 | 0.0 | 0.0 | 0.0   | 0.0   |
| Rpl10l   | 0.0 | 0.0 | 0.0 | 0.0 | 0.0 | 0.0   | 0.0   | 0.0 | 0.0 | 0.0 | 0.0   | 0.0   |
| Rprml    | 0.0 | 0.0 | 0.0 | 0.1 | 0.0 | 0.0   | 0.0   | 0.0 | 0.0 | 0.0 | 0.0   | 0.0   |
| Rrh      | 0.0 | 0.0 | 0.0 | 0.0 | 0.0 | 0.0   | 0.0   | 0.0 | 0.0 | 0.0 | 0.0   | 0.0   |

Excluded Genes

|           |     |     |     |     |     |     |      |     |     |     |      |     |
|-----------|-----|-----|-----|-----|-----|-----|------|-----|-----|-----|------|-----|
| Rspo4     | 0.0 | 0.0 | 0.0 | 0.0 | 0.0 | 0.0 | 0.0  | 0.0 | 0.0 | 0.0 | 0.0  | 0.0 |
| Rtdr1     | 0.0 | 0.0 | 0.0 | 0.0 | 0.0 | 0.0 | 0.0  | 0.0 | 0.0 | 0.0 | 0.1  | 0.0 |
| Rtp1      | 0.0 | 0.0 | 0.0 | 0.0 | 0.0 | 0.0 | 0.0  | 0.0 | 0.0 | 0.0 | 0.0  | 0.0 |
| Rtp2      | 0.0 | 0.0 | 0.0 | 0.0 | 0.0 | 0.0 | 0.0  | 0.0 | 0.0 | 0.0 | 0.0  | 0.0 |
| Rtp3      | 0.0 | 0.0 | 0.1 | 0.0 | 0.0 | 0.0 | 0.0  | 0.0 | 0.0 | 0.0 | 0.0  | 0.0 |
| Rubie     | 0.0 | 0.0 | 0.0 | 0.0 | 0.0 | 0.0 | 0.0  | 0.0 | 0.0 | 0.0 | 0.0  | 0.0 |
| Rxfp1     | 0.0 | 0.0 | 0.0 | 0.0 | 0.0 | 0.0 | 0.0  | 0.0 | 0.0 | 0.0 | 0.0  | 0.0 |
| Rxfp2     | 0.0 | 0.0 | 0.0 | 0.0 | 0.0 | 0.0 | 0.0  | 0.0 | 0.0 | 0.0 | 0.0  | 0.0 |
| S100a2    | 0.0 | 0.0 | 0.3 | 0.0 | 0.3 | 0.0 | 0.0  | 0.0 | 0.0 | 0.0 | 0.0  | 0.0 |
| S100a9    | 0.0 | 0.0 | 0.1 | 0.1 | 0.0 | 0.0 | 0.0  | 0.0 | 0.0 | 0.0 | 0.0  | 0.0 |
| S100g     | 0.0 | 0.1 | 0.0 | 0.0 | 0.0 | 0.0 | 0.0  | 0.0 | 0.0 | 0.0 | 0.3  | 0.0 |
| Saa2      | 0.0 | 0.0 | 0.0 | 0.0 | 0.1 | 0.0 | 0.0  | 0.0 | 0.0 | 0.0 | 0.0  | 0.0 |
| Saa4      | 0.0 | 0.0 | 0.0 | 0.0 | 0.0 | 0.0 | 0.0  | 0.0 | 0.0 | 0.0 | 0.0  | 0.0 |
| Sall1     | 0.0 | 0.0 | 0.0 | 0.0 | 0.0 | 0.0 | 0.0  | 0.0 | 0.0 | 0.0 | 0.0  | 0.0 |
| Sall4     | 0.0 | 0.0 | 0.0 | 0.0 | 0.0 | 0.0 | 0.0  | 0.0 | 0.0 | 0.0 | 0.0  | 0.0 |
| Samd3     | 0.1 | 0.0 | 0.0 | 0.0 | 0.0 | 0.0 | 0.0  | 0.0 | 0.0 | 0.0 | 0.0  | 0.0 |
| Satl1     | 0.0 | 0.0 | 0.0 | 0.0 | 0.0 | 0.0 | 0.0  | 0.0 | 0.0 | 0.0 | 0.0  | 0.0 |
| Scarna8   | 3.6 | 4.4 | 0.0 | 0.0 | 0.0 | 0.0 | 14.4 | 0.0 | 0.0 | 0.0 | 17.5 | 0.0 |
| Scg5      | 0.0 | 0.0 | 0.0 | 0.0 | 0.0 | 0.0 | 0.0  | 0.0 | 0.0 | 0.0 | 0.0  | 0.0 |
| Scgb2b20  | 0.0 | 0.0 | 0.0 | 0.1 | 0.0 | 0.0 | 0.0  | 0.0 | 0.0 | 0.0 | 0.0  | 0.0 |
| Scgb2b27  | 0.0 | 0.0 | 0.0 | 0.0 | 0.0 | 0.0 | 0.0  | 0.0 | 0.0 | 0.0 | 0.0  | 0.0 |
| Scgb2b7   | 0.0 | 0.0 | 0.0 | 0.1 | 0.0 | 0.0 | 0.0  | 0.0 | 0.0 | 0.0 | 0.0  | 0.0 |
| Scn10a    | 0.0 | 0.0 | 0.0 | 0.0 | 0.0 | 0.0 | 0.0  | 0.0 | 0.0 | 0.0 | 0.0  | 0.0 |
| Scnn1b    | 0.0 | 0.0 | 0.0 | 0.0 | 0.0 | 0.0 | 0.0  | 0.0 | 0.0 | 0.0 | 0.0  | 0.0 |
| Scrg1     | 0.0 | 0.0 | 0.0 | 0.0 | 0.0 | 0.0 | 0.1  | 0.0 | 0.0 | 0.0 | 0.0  | 0.0 |
| Scrt1     | 0.0 | 0.0 | 0.0 | 0.0 | 0.0 | 0.0 | 0.0  | 0.0 | 0.0 | 0.0 | 0.0  | 0.0 |
| Scrt2     | 0.0 | 0.0 | 0.0 | 0.0 | 0.0 | 0.0 | 0.0  | 0.0 | 0.0 | 0.0 | 0.0  | 0.0 |
| Sdr9c7    | 0.0 | 0.0 | 0.0 | 0.0 | 0.0 | 0.0 | 0.0  | 0.0 | 0.0 | 0.0 | 0.0  | 0.0 |
| Sec14l3   | 0.0 | 0.0 | 0.0 | 0.0 | 0.0 | 0.0 | 0.0  | 0.0 | 0.0 | 0.0 | 0.0  | 0.0 |
| Sec14l4   | 0.0 | 0.0 | 0.0 | 0.0 | 0.0 | 0.0 | 0.0  | 0.0 | 0.0 | 0.0 | 0.0  | 0.0 |
| Sel1l2    | 0.0 | 0.0 | 0.0 | 0.0 | 0.0 | 0.0 | 0.0  | 0.0 | 0.0 | 0.0 | 0.0  | 0.0 |
| Sell      | 0.0 | 0.0 | 0.0 | 0.0 | 0.0 | 0.0 | 0.0  | 0.0 | 0.0 | 0.0 | 0.0  | 0.0 |
| Serpina10 | 0.0 | 0.0 | 0.0 | 0.0 | 0.0 | 0.0 | 0.0  | 0.0 | 0.0 | 0.0 | 0.0  | 0.0 |
| Serpina1a | 0.0 | 0.0 | 0.0 | 0.0 | 0.0 | 0.0 | 0.0  | 0.0 | 0.0 | 0.0 | 0.0  | 0.0 |
| Serpina1b | 0.0 | 0.0 | 0.0 | 0.0 | 0.0 | 0.0 | 0.0  | 0.0 | 0.0 | 0.0 | 0.0  | 0.0 |
| Serpina1c | 0.0 | 0.0 | 0.0 | 0.0 | 0.0 | 0.0 | 0.0  | 0.0 | 0.0 | 0.0 | 0.0  | 0.0 |
| Serpina1d | 0.0 | 0.0 | 0.0 | 0.0 | 0.0 | 0.0 | 0.0  | 0.0 | 0.0 | 0.0 | 0.0  | 0.0 |
| Serpina1e | 0.0 | 0.0 | 0.0 | 0.0 | 0.0 | 0.0 | 0.0  | 0.0 | 0.0 | 0.0 | 0.0  | 0.0 |
| Serpina1f | 0.0 | 0.0 | 0.0 | 0.0 | 0.0 | 0.0 | 0.0  | 0.0 | 0.0 | 0.0 | 0.0  | 0.0 |
| Serpina6  | 0.0 | 0.0 | 0.0 | 0.0 | 0.0 | 0.0 | 0.0  | 0.0 | 0.0 | 0.0 | 0.0  | 0.0 |
| Serpina7  | 0.0 | 0.0 | 0.0 | 0.0 | 0.0 | 0.0 | 0.0  | 0.0 | 0.0 | 0.1 | 0.0  | 0.0 |
| Serpinb10 | 0.0 | 0.0 | 0.0 | 0.0 | 0.0 | 0.0 | 0.0  | 0.0 | 0.0 | 0.0 | 0.0  | 0.0 |
| Serpinb11 | 0.0 | 0.0 | 0.0 | 0.0 | 0.0 | 0.0 | 0.0  | 0.0 | 0.0 | 0.0 | 0.0  | 0.0 |
| Serpinb3d | 0.0 | 0.0 | 0.0 | 0.0 | 0.0 | 0.0 | 0.0  | 0.0 | 0.0 | 0.0 | 0.0  | 0.0 |
| Serpinb5  | 0.0 | 0.0 | 0.0 | 0.0 | 0.0 | 0.0 | 0.0  | 0.0 | 0.0 | 0.0 | 0.0  | 0.0 |
| Serpinb6d | 0.0 | 0.0 | 0.0 | 0.0 | 0.0 | 0.0 | 0.0  | 0.0 | 0.0 | 0.0 | 0.0  | 0.0 |
| Serpinb6e | 0.0 | 0.1 | 0.0 | 0.0 | 0.0 | 0.0 | 0.0  | 0.0 | 0.0 | 0.0 | 0.0  | 0.0 |
| Serpinb7  | 0.0 | 0.0 | 0.0 | 0.0 | 0.0 | 0.0 | 0.0  | 0.0 | 0.0 | 0.0 | 0.0  | 0.0 |
| Serpinb9d | 0.0 | 0.0 | 0.0 | 0.1 | 0.1 | 0.0 | 0.0  | 0.0 | 0.0 | 0.0 | 0.0  | 0.0 |
| Serpinb9e | 0.1 | 0.0 | 0.0 | 0.0 | 0.0 | 0.0 | 0.0  | 0.0 | 0.0 | 0.0 | 0.0  | 0.0 |
| Serpinb9f | 0.0 | 0.0 | 0.0 | 0.0 | 0.0 | 0.0 | 0.0  | 0.0 | 0.0 | 0.0 | 0.0  | 0.0 |
| Serpinb9g | 0.0 | 0.0 | 0.0 | 0.0 | 0.0 | 0.0 | 0.0  | 0.0 | 0.0 | 0.0 | 0.0  | 0.0 |
| Sertm1    | 0.0 | 0.0 | 0.0 | 0.0 | 0.0 | 0.0 | 0.0  | 0.0 | 0.0 | 0.0 | 0.0  | 0.0 |
| Sez6      | 0.0 | 0.0 | 0.0 | 0.0 | 0.0 | 0.0 | 0.0  | 0.0 | 0.0 | 0.0 | 0.0  | 0.0 |
| Sfta2     | 0.0 | 0.0 | 0.0 | 0.0 | 0.0 | 0.0 | 0.0  | 0.0 | 0.0 | 0.1 | 0.0  | 0.0 |
| Sftpa1    | 0.0 | 0.0 | 0.0 | 0.0 | 0.0 | 0.0 | 0.0  | 0.0 | 0.0 | 0.0 | 0.0  | 0.0 |
| Sftpc     | 0.0 | 0.1 | 0.0 | 0.0 | 0.0 | 0.0 | 0.0  | 0.0 | 0.0 | 0.0 | 0.0  | 0.0 |

Excluded Genes

|          |     |     |     |     |     |     |     |     |     |     |     |     |
|----------|-----|-----|-----|-----|-----|-----|-----|-----|-----|-----|-----|-----|
| Sh2d1a   | 0.0 | 0.0 | 0.0 | 0.0 | 0.0 | 0.0 | 0.0 | 0.0 | 0.0 | 0.0 | 0.0 | 0.0 |
| Sh2d1b2  | 0.0 | 0.0 | 0.0 | 0.0 | 0.1 | 0.0 | 0.0 | 0.0 | 0.0 | 0.1 | 0.0 | 0.0 |
| Sh3gl2   | 0.0 | 0.0 | 0.0 | 0.0 | 0.0 | 0.0 | 0.0 | 0.0 | 0.0 | 0.0 | 0.0 | 0.0 |
| Shbg     | 0.0 | 0.0 | 0.0 | 0.0 | 0.0 | 0.0 | 0.0 | 0.0 | 0.0 | 0.0 | 0.0 | 0.0 |
| Shcbp1l  | 0.0 | 0.0 | 0.0 | 0.0 | 0.0 | 0.0 | 0.0 | 0.0 | 0.0 | 0.0 | 0.1 | 0.0 |
| Shh      | 0.0 | 0.0 | 0.0 | 0.0 | 0.0 | 0.0 | 0.0 | 0.0 | 0.0 | 0.0 | 0.0 | 0.0 |
| Shisa3   | 0.0 | 0.0 | 0.0 | 0.0 | 0.0 | 0.0 | 0.0 | 0.0 | 0.0 | 0.0 | 0.0 | 0.0 |
| Shisa7   | 0.0 | 0.0 | 0.0 | 0.0 | 0.0 | 0.0 | 0.0 | 0.0 | 0.0 | 0.0 | 0.0 | 0.0 |
| Siah3    | 0.0 | 0.0 | 0.0 | 0.0 | 0.0 | 0.0 | 0.0 | 0.0 | 0.0 | 0.0 | 0.0 | 0.0 |
| Siglec15 | 0.0 | 0.0 | 0.0 | 0.1 | 0.0 | 0.0 | 0.0 | 0.0 | 0.0 | 0.0 | 0.0 | 0.0 |
| Sim1     | 0.0 | 0.0 | 0.0 | 0.0 | 0.0 | 0.0 | 0.0 | 0.0 | 0.0 | 0.0 | 0.0 | 0.0 |
| Sis      | 0.0 | 0.0 | 0.0 | 0.0 | 0.0 | 0.0 | 0.0 | 0.0 | 0.0 | 0.0 | 0.0 | 0.0 |
| Sit1     | 0.1 | 0.0 | 0.0 | 0.0 | 0.0 | 0.0 | 0.0 | 0.0 | 0.0 | 0.0 | 0.0 | 0.0 |
| Six3     | 0.0 | 0.0 | 0.0 | 0.0 | 0.0 | 0.0 | 0.0 | 0.0 | 0.0 | 0.0 | 0.0 | 0.0 |
| Six3os1  | 0.0 | 0.0 | 0.0 | 0.0 | 0.0 | 0.1 | 0.0 | 0.0 | 0.0 | 0.0 | 0.0 | 0.0 |
| Skint1   | 0.0 | 0.0 | 0.0 | 0.0 | 0.0 | 0.1 | 0.0 | 0.0 | 0.0 | 0.0 | 0.0 | 0.0 |
| Skint10  | 0.0 | 0.0 | 0.0 | 0.0 | 0.0 | 0.0 | 0.0 | 0.0 | 0.0 | 0.0 | 0.0 | 0.0 |
| Skint3   | 0.0 | 0.0 | 0.0 | 0.0 | 0.1 | 0.0 | 0.0 | 0.0 | 0.0 | 0.0 | 0.0 | 0.0 |
| Skint4   | 0.0 | 0.0 | 0.0 | 0.0 | 0.0 | 0.0 | 0.0 | 0.0 | 0.0 | 0.0 | 0.0 | 0.0 |
| Skint5   | 0.0 | 0.0 | 0.0 | 0.0 | 0.0 | 0.0 | 0.0 | 0.0 | 0.0 | 0.0 | 0.0 | 0.0 |
| Skint6   | 0.0 | 0.0 | 0.0 | 0.0 | 0.0 | 0.0 | 0.0 | 0.0 | 0.0 | 0.0 | 0.0 | 0.0 |
| Skint9   | 0.0 | 0.0 | 0.0 | 0.0 | 0.0 | 0.1 | 0.0 | 0.0 | 0.0 | 0.0 | 0.0 | 0.0 |
| Slamf1   | 0.0 | 0.0 | 0.0 | 0.0 | 0.0 | 0.0 | 0.0 | 0.0 | 0.0 | 0.0 | 0.0 | 0.0 |
| Slc10a4  | 0.0 | 0.0 | 0.0 | 0.0 | 0.0 | 0.0 | 0.0 | 0.0 | 0.0 | 0.0 | 0.0 | 0.0 |
| Slc10a5  | 0.0 | 0.0 | 0.0 | 0.0 | 0.0 | 0.0 | 0.0 | 0.0 | 0.0 | 0.0 | 0.0 | 0.0 |
| Slc12a3  | 0.0 | 0.0 | 0.0 | 0.0 | 0.0 | 0.0 | 0.0 | 0.0 | 0.0 | 0.0 | 0.0 | 0.0 |
| Slc13a1  | 0.0 | 0.0 | 0.0 | 0.0 | 0.0 | 0.0 | 0.0 | 0.0 | 0.0 | 0.0 | 0.0 | 0.0 |
| Slc13a2  | 0.0 | 0.0 | 0.0 | 0.0 | 0.0 | 0.0 | 0.0 | 0.0 | 0.0 | 0.0 | 0.0 | 0.0 |
| Slc14a1  | 0.0 | 0.0 | 0.0 | 0.0 | 0.0 | 0.0 | 0.0 | 0.0 | 0.0 | 0.0 | 0.0 | 0.0 |
| Slc16a14 | 0.0 | 0.0 | 0.0 | 0.0 | 0.0 | 0.0 | 0.0 | 0.0 | 0.0 | 0.0 | 0.0 | 0.0 |
| Slc17a2  | 0.0 | 0.0 | 0.0 | 0.0 | 0.0 | 0.0 | 0.0 | 0.0 | 0.0 | 0.0 | 0.1 | 0.0 |
| Slc17a3  | 0.0 | 0.0 | 0.0 | 0.0 | 0.0 | 0.0 | 0.0 | 0.0 | 0.0 | 0.0 | 0.0 | 0.0 |
| Slc17a4  | 0.0 | 0.0 | 0.0 | 0.0 | 0.0 | 0.0 | 0.0 | 0.0 | 0.0 | 0.0 | 0.0 | 0.0 |
| Slc18a3  | 0.0 | 0.0 | 0.0 | 0.0 | 0.0 | 0.0 | 0.0 | 0.0 | 0.0 | 0.0 | 0.0 | 0.0 |
| Slc22a1  | 0.0 | 0.0 | 0.0 | 0.0 | 0.0 | 0.1 | 0.0 | 0.0 | 0.0 | 0.0 | 0.0 | 0.0 |
| Slc22a12 | 0.0 | 0.0 | 0.0 | 0.0 | 0.0 | 0.1 | 0.0 | 0.0 | 0.0 | 0.0 | 0.0 | 0.0 |
| Slc22a16 | 0.0 | 0.0 | 0.0 | 0.0 | 0.0 | 0.0 | 0.0 | 0.0 | 0.0 | 0.0 | 0.0 | 0.0 |
| Slc22a19 | 0.0 | 0.0 | 0.0 | 0.0 | 0.0 | 0.0 | 0.0 | 0.0 | 0.0 | 0.0 | 0.0 | 0.0 |
| Slc22a22 | 0.0 | 0.0 | 0.0 | 0.0 | 0.0 | 0.0 | 0.0 | 0.0 | 0.0 | 0.0 | 0.0 | 0.0 |
| Slc22a26 | 0.0 | 0.0 | 0.0 | 0.0 | 0.0 | 0.0 | 0.0 | 0.0 | 0.0 | 0.0 | 0.0 | 0.0 |
| Slc22a28 | 0.0 | 0.0 | 0.1 | 0.0 | 0.0 | 0.0 | 0.0 | 0.0 | 0.0 | 0.0 | 0.0 | 0.0 |
| Slc22a29 | 0.0 | 0.0 | 0.0 | 0.0 | 0.0 | 0.0 | 0.0 | 0.0 | 0.0 | 0.0 | 0.0 | 0.0 |
| Slc22a30 | 0.0 | 0.0 | 0.1 | 0.0 | 0.0 | 0.0 | 0.0 | 0.0 | 0.0 | 0.0 | 0.0 | 0.0 |
| Slc22a7  | 0.0 | 0.0 | 0.0 | 0.0 | 0.0 | 0.0 | 0.0 | 0.0 | 0.0 | 0.0 | 0.0 | 0.0 |
| Slc25a48 | 0.0 | 0.0 | 0.0 | 0.0 | 0.0 | 0.0 | 0.0 | 0.0 | 0.0 | 0.0 | 0.0 | 0.0 |
| Slc25a54 | 0.0 | 0.0 | 0.0 | 0.0 | 0.0 | 0.0 | 0.0 | 0.0 | 0.0 | 0.0 | 0.0 | 0.0 |
| Slc26a3  | 0.0 | 0.0 | 0.0 | 0.0 | 0.0 | 0.0 | 0.0 | 0.0 | 0.0 | 0.0 | 0.0 | 0.0 |
| Slc26a4  | 0.0 | 0.0 | 0.0 | 0.0 | 0.0 | 0.0 | 0.0 | 0.0 | 0.0 | 0.0 | 0.0 | 0.0 |
| Slc26a9  | 0.0 | 0.0 | 0.0 | 0.0 | 0.0 | 0.0 | 0.0 | 0.0 | 0.0 | 0.0 | 0.0 | 0.0 |
| Slc27a2  | 0.0 | 0.0 | 0.0 | 0.0 | 0.0 | 0.0 | 0.0 | 0.0 | 0.0 | 0.0 | 0.0 | 0.0 |
| Slc2a7   | 0.0 | 0.0 | 0.0 | 0.0 | 0.0 | 0.0 | 0.0 | 0.0 | 0.0 | 0.0 | 0.0 | 0.0 |
| Slc30a10 | 0.0 | 0.0 | 0.0 | 0.0 | 0.0 | 0.0 | 0.0 | 0.0 | 0.0 | 0.0 | 0.0 | 0.0 |
| Slc30a2  | 0.0 | 0.0 | 0.0 | 0.0 | 0.0 | 0.0 | 0.0 | 0.0 | 0.0 | 0.0 | 0.0 | 0.0 |
| Slc30a3  | 0.0 | 0.0 | 0.0 | 0.0 | 0.0 | 0.0 | 0.0 | 0.0 | 0.0 | 0.0 | 0.0 | 0.0 |
| Slc32a1  | 0.0 | 0.0 | 0.0 | 0.0 | 0.0 | 0.0 | 0.0 | 0.0 | 0.0 | 0.0 | 0.0 | 0.0 |
| Slc34a1  | 0.0 | 0.0 | 0.0 | 0.0 | 0.0 | 0.0 | 0.0 | 0.0 | 0.0 | 0.0 | 0.0 | 0.0 |
| Slc34a2  | 0.0 | 0.0 | 0.0 | 0.0 | 0.0 | 0.0 | 0.0 | 0.0 | 0.0 | 0.0 | 0.0 | 0.0 |

Excluded Genes

|            |        |        |      |       |       |       |     |       |       |        |       |       |
|------------|--------|--------|------|-------|-------|-------|-----|-------|-------|--------|-------|-------|
| Slc35f4    | 0.0    | 0.0    | 0.0  | 0.0   | 0.0   | 0.0   | 0.0 | 0.0   | 0.0   | 0.0    | 0.0   | 0.0   |
| Slc36a3    | 0.1    | 0.0    | 0.0  | 0.0   | 0.0   | 0.0   | 0.0 | 0.0   | 0.0   | 0.0    | 0.0   | 0.0   |
| Slc38a3    | 0.0    | 0.0    | 0.0  | 0.1   | 0.0   | 0.0   | 0.0 | 0.0   | 0.0   | 0.0    | 0.0   | 0.0   |
| Slc39a12   | 0.0    | 0.0    | 0.0  | 0.0   | 0.0   | 0.0   | 0.0 | 0.0   | 0.0   | 0.0    | 0.0   | 0.0   |
| Slc47a2    | 0.0    | 0.0    | 0.0  | 0.0   | 0.0   | 0.0   | 0.0 | 0.0   | 0.0   | 0.0    | 0.0   | 0.0   |
| Slc4a1     | 0.0    | 0.0    | 0.0  | 0.0   | 0.0   | 0.0   | 0.0 | 0.0   | 0.0   | 0.0    | 0.0   | 0.0   |
| Slc5a10    | 0.0    | 0.0    | 0.0  | 0.0   | 0.0   | 0.0   | 0.0 | 0.0   | 0.0   | 0.0    | 0.0   | 0.0   |
| Slc5a4a    | 0.0    | 0.0    | 0.0  | 0.0   | 0.0   | 0.0   | 0.0 | 0.0   | 0.0   | 0.0    | 0.0   | 0.0   |
| Slc5a9     | 0.0    | 0.0    | 0.0  | 0.0   | 0.0   | 0.0   | 0.0 | 0.0   | 0.0   | 0.0    | 0.0   | 0.0   |
| Slc6a11    | 0.0    | 0.0    | 0.0  | 0.0   | 0.0   | 0.0   | 0.0 | 0.0   | 0.0   | 0.0    | 0.0   | 0.0   |
| Slc6a13    | 0.0    | 0.0    | 0.1  | 0.0   | 0.1   | 0.0   | 0.0 | 0.0   | 0.0   | 0.0    | 0.0   | 0.0   |
| Slc6a14    | 0.0    | 0.0    | 0.0  | 0.0   | 0.0   | 0.0   | 0.0 | 0.0   | 0.0   | 0.0    | 0.0   | 0.0   |
| Slc6a15    | 0.0    | 0.0    | 0.0  | 0.0   | 0.0   | 0.0   | 0.0 | 0.0   | 0.0   | 0.0    | 0.0   | 0.0   |
| Slc6a3     | 0.0    | 0.0    | 0.0  | 0.0   | 0.0   | 0.0   | 0.0 | 0.0   | 0.0   | 0.0    | 0.0   | 0.0   |
| Slc7a15    | 0.0    | 0.0    | 0.0  | 0.0   | 0.0   | 0.1   | 0.0 | 0.0   | 0.0   | 0.0    | 0.0   | 0.0   |
| Slc7a9     | 0.0    | 0.0    | 0.0  | 0.0   | 0.0   | 0.0   | 0.0 | 0.0   | 0.0   | 0.0    | 0.0   | 0.0   |
| Slc9a3     | 0.0    | 0.0    | 0.0  | 0.0   | 0.0   | 0.0   | 0.0 | 0.0   | 0.0   | 0.0    | 0.0   | 0.0   |
| Slc9c1     | 0.0    | 0.0    | 0.0  | 0.0   | 0.0   | 0.0   | 0.0 | 0.0   | 0.0   | 0.0    | 0.0   | 0.0   |
| Slco1a6    | 0.0    | 0.0    | 0.0  | 0.0   | 0.0   | 0.0   | 0.0 | 0.0   | 0.0   | 0.0    | 0.0   | 0.0   |
| Slco1b2    | 0.0    | 0.0    | 0.0  | 0.0   | 0.0   | 0.0   | 0.0 | 0.0   | 0.0   | 0.0    | 0.0   | 0.0   |
| Slco4c1    | 0.0    | 0.0    | 0.0  | 0.0   | 0.0   | 0.0   | 0.0 | 0.0   | 0.0   | 0.0    | 0.0   | 0.0   |
| Slco6c1    | 0.0    | 0.0    | 0.0  | 0.0   | 0.0   | 0.0   | 0.0 | 0.0   | 0.0   | 0.0    | 0.0   | 0.0   |
| Slco6d1    | 0.0    | 0.0    | 0.0  | 0.0   | 0.0   | 0.0   | 0.0 | 0.0   | 0.0   | 0.0    | 0.0   | 0.0   |
| Sln1       | 0.0    | 0.0    | 0.0  | 0.0   | 0.0   | 0.0   | 0.0 | 0.0   | 0.0   | 0.0    | 0.0   | 0.0   |
| Sliitr3    | 0.0    | 0.0    | 0.0  | 0.0   | 0.0   | 0.0   | 0.0 | 0.0   | 0.0   | 0.0    | 0.0   | 0.0   |
| Slurp1     | 0.0    | 0.0    | 0.0  | 0.3   | 0.0   | 0.0   | 0.0 | 0.1   | 0.0   | 0.0    | 0.0   | 0.2   |
| Slx        | 0.0    | 0.0    | 0.0  | 0.0   | 0.0   | 0.0   | 0.0 | 0.0   | 0.0   | 0.0    | 0.0   | 0.0   |
| Slxl1      | 0.0    | 0.0    | 0.0  | 0.0   | 0.0   | 0.0   | 0.0 | 0.0   | 0.0   | 0.0    | 0.0   | 0.0   |
| Sly        | 0.0    | 0.0    | 0.0  | 0.0   | 0.0   | 0.0   | 0.0 | 0.0   | 0.0   | 0.0    | 0.0   | 0.0   |
| Smim18     | 0.0    | 0.1    | 0.0  | 0.0   | 0.1   | 0.0   | 0.0 | 0.1   | 0.0   | 0.3    | 0.0   | 0.1   |
| Smok2a     | 0.0    | 0.0    | 0.0  | 0.0   | 0.0   | 0.0   | 0.0 | 0.0   | 0.0   | 0.0    | 0.0   | 0.0   |
| Smok3a     | 0.0    | 0.0    | 0.0  | 0.0   | 0.0   | 0.0   | 0.0 | 0.0   | 0.0   | 0.0    | 0.0   | 0.0   |
| Smpx       | 0.0    | 0.0    | 0.0  | 0.0   | 0.0   | 0.0   | 0.0 | 0.0   | 0.0   | 0.0    | 0.0   | 0.0   |
| Smr3a      | 0.1    | 0.0    | 0.0  | 0.0   | 0.0   | 0.0   | 0.0 | 0.0   | 0.0   | 0.0    | 0.0   | 0.0   |
| Smtnl1     | 0.0    | 0.0    | 0.0  | 0.0   | 0.0   | 0.0   | 0.0 | 0.0   | 0.0   | 0.0    | 0.0   | 0.0   |
| Snai3      | 0.0    | 0.0    | 0.1  | 0.0   | 0.1   | 0.0   | 0.0 | 0.0   | 0.0   | 0.0    | 0.0   | 0.1   |
| Snap25     | 0.0    | 0.0    | 0.0  | 0.0   | 0.0   | 0.0   | 0.0 | 0.0   | 0.0   | 0.0    | 0.0   | 0.0   |
| Snora2b    | 0.0    | 5.8    | 0.0  | 0.0   | 0.0   | 0.0   | 0.0 | 0.0   | 0.0   | 0.0    | 0.0   | 0.0   |
| Snora41    | 0.0    | 0.0    | 0.0  | 0.0   | 0.0   | 0.0   | 0.0 | 9.3   | 0.0   | 0.0    | 7.3   | 0.0   |
| Snora61    | 0.0    | 0.0    | 0.0  | 0.0   | 0.0   | 0.0   | 0.0 | 0.0   | 279.5 | 323.6  | 0.0   | 0.0   |
| Snora75    | 7.9    | 0.0    | 9.8  | 0.0   | 3.3   | 0.0   | 0.0 | 0.0   | 4.0   | 0.0    | 0.0   | 3.9   |
| Snord11    | 0.0    | 0.0    | 0.0  | 0.0   | 0.0   | 0.0   | 0.0 | 0.0   | 0.0   | 0.0    | 0.0   | 222.9 |
| Snord116l2 | 1.7    | 0.0    | 0.0  | 0.0   | 0.0   | 0.0   | 0.0 | 0.0   | 1.4   | 1.9    | 0.0   | 0.0   |
| Snord123   | 0.0    | 0.0    | 0.0  | 0.0   | 0.0   | 0.0   | 0.0 | 0.0   | 19.0  | 0.0    | 0.0   | 17.9  |
| Snord19    | 0.0    | 0.0    | 0.0  | 0.0   | 0.0   | 0.0   | 0.0 | 0.0   | 0.0   | 0.0    | 0.0   | 937.2 |
| Snord1b    | 0.0    | 182.5  | 67.1 | 0.0   | 102.6 | 0.0   | 0.0 | 141.1 | 139.5 | 0.0    | 100.6 | 0.0   |
| Snord2     | 0.0    | 0.0    | 0.0  | 0.0   | 0.0   | 308.2 | 0.0 | 0.0   | 0.0   | 0.0    | 0.0   | 0.0   |
| Snord23    | 0.0    | 11.9   | 0.0  | 0.0   | 7.6   | 0.0   | 0.0 | 0.0   | 0.0   | 0.0    | 16.4  | 9.0   |
| Snord42b   | 0.0    | 1099.4 | 0.0  | 0.0   | 0.0   | 0.0   | 0.0 | 0.0   | 0.0   | 0.0    | 0.0   | 0.0   |
| Snord43    | 3708.9 | 0.0    | 0.0  | 0.0   | 0.0   | 0.0   | 0.0 | 0.0   | 0.0   | 0.0    | 0.0   | 0.0   |
| Snord53    | 0.0    | 0.0    | 0.0  | 0.0   | 0.0   | 0.0   | 0.0 | 0.0   | 0.0   | 146.9  | 0.0   | 0.0   |
| Snord66    | 0.0    | 0.0    | 0.0  | 0.0   | 0.0   | 0.0   | 0.0 | 490.9 | 0.0   | 0.0    | 0.0   | 0.0   |
| Snord69    | 0.0    | 0.0    | 0.0  | 0.0   | 0.0   | 0.0   | 0.0 | 420.1 | 0.0   | 1005.9 | 0.0   | 0.0   |
| Snord71    | 0.0    | 271.8  | 0.0  | 0.0   | 0.0   | 0.0   | 0.0 | 0.0   | 0.0   | 0.0    | 0.0   | 0.0   |
| Snord88c   | 0.0    | 0.0    | 0.0  | 0.0   | 38.9  | 0.0   | 0.0 | 0.0   | 0.0   | 0.0    | 0.0   | 0.0   |
| Snord96a   | 0.0    | 0.0    | 0.0  | 105.2 | 42.8  | 0.0   | 0.0 | 0.0   | 0.0   | 0.0    | 0.0   | 35.2  |
| Sntn       | 0.0    | 0.0    | 0.0  | 0.0   | 0.0   | 0.1   | 0.1 | 0.0   | 0.0   | 0.0    | 0.0   | 0.0   |

Excluded Genes

|            |     |     |     |     |     |     |     |     |     |     |     |     |
|------------|-----|-----|-----|-----|-----|-----|-----|-----|-----|-----|-----|-----|
| Sostdc1    | 0.0 | 0.0 | 0.0 | 0.0 | 0.0 | 0.0 | 0.0 | 0.0 | 0.0 | 0.0 | 0.0 | 0.0 |
| Sowaha     | 0.0 | 0.0 | 0.0 | 0.0 | 0.0 | 0.0 | 0.0 | 0.0 | 0.0 | 0.0 | 0.0 | 0.0 |
| Sox1       | 0.0 | 0.0 | 0.0 | 0.0 | 0.0 | 0.0 | 0.0 | 0.0 | 0.0 | 0.0 | 0.0 | 0.0 |
| Sox2       | 0.0 | 0.0 | 0.0 | 0.0 | 0.0 | 0.0 | 0.0 | 0.0 | 0.0 | 0.0 | 0.0 | 0.0 |
| Sox3       | 0.0 | 0.0 | 0.0 | 0.0 | 0.0 | 0.0 | 0.0 | 0.0 | 0.0 | 0.0 | 0.0 | 0.0 |
| Sp5        | 0.0 | 0.0 | 0.0 | 0.0 | 0.0 | 0.1 | 0.0 | 0.1 | 0.0 | 0.0 | 0.0 | 0.0 |
| Sp8        | 0.0 | 0.0 | 0.0 | 0.0 | 0.0 | 0.0 | 0.0 | 0.0 | 0.0 | 0.0 | 0.0 | 0.0 |
| Spaca3     | 0.0 | 0.0 | 0.0 | 0.0 | 0.0 | 0.0 | 0.0 | 0.0 | 0.0 | 0.1 | 0.0 | 0.0 |
| Spaca5     | 0.0 | 0.0 | 0.0 | 0.0 | 0.1 | 0.0 | 0.0 | 0.0 | 0.0 | 0.0 | 0.0 | 0.0 |
| Spag11b    | 0.0 | 0.0 | 0.0 | 0.0 | 0.0 | 0.0 | 0.0 | 0.0 | 0.0 | 0.0 | 0.0 | 0.0 |
| Spag16     | 0.0 | 0.0 | 0.0 | 0.0 | 0.0 | 0.0 | 0.0 | 0.0 | 0.0 | 0.0 | 0.0 | 0.0 |
| Spag6      | 0.0 | 0.0 | 0.0 | 0.0 | 0.0 | 0.0 | 0.0 | 0.0 | 0.0 | 0.0 | 0.0 | 0.0 |
| Spata16    | 0.0 | 0.0 | 0.0 | 0.0 | 0.0 | 0.0 | 0.0 | 0.0 | 0.0 | 0.0 | 0.0 | 0.0 |
| Spata19    | 0.1 | 0.0 | 0.0 | 0.2 | 0.0 | 0.0 | 0.0 | 0.0 | 0.0 | 0.0 | 0.0 | 0.0 |
| Spata21    | 0.0 | 0.0 | 0.0 | 0.0 | 0.0 | 0.0 | 0.0 | 0.0 | 0.0 | 0.0 | 0.0 | 0.0 |
| Spata3     | 0.0 | 0.1 | 0.0 | 0.0 | 0.0 | 0.1 | 0.0 | 0.0 | 0.1 | 0.1 | 0.0 | 0.0 |
| Spata31d1b | 0.0 | 0.0 | 0.0 | 0.0 | 0.0 | 0.0 | 0.0 | 0.0 | 0.0 | 0.0 | 0.0 | 0.0 |
| Spata32    | 0.0 | 0.0 | 0.0 | 0.3 | 0.0 | 0.0 | 0.0 | 0.0 | 0.0 | 0.0 | 0.0 | 0.0 |
| Spdyb      | 0.0 | 0.0 | 0.0 | 0.0 | 0.0 | 0.0 | 0.0 | 0.0 | 0.0 | 0.0 | 0.0 | 0.0 |
| Speer2     | 0.0 | 0.0 | 0.0 | 0.0 | 0.0 | 0.0 | 0.0 | 0.0 | 0.0 | 0.0 | 0.0 | 0.0 |
| Speer4d    | 0.0 | 0.0 | 0.0 | 0.0 | 0.0 | 0.0 | 0.0 | 0.0 | 0.0 | 0.0 | 0.0 | 0.0 |
| Speer4e    | 0.0 | 0.0 | 0.0 | 0.0 | 0.0 | 0.0 | 0.0 | 0.0 | 0.0 | 0.0 | 0.0 | 0.0 |
| Spem1      | 0.1 | 0.0 | 0.1 | 0.0 | 0.0 | 0.0 | 0.0 | 0.0 | 0.0 | 0.0 | 0.0 | 0.0 |
| Spesp1     | 0.0 | 0.0 | 0.0 | 0.0 | 0.0 | 0.0 | 0.0 | 0.0 | 0.0 | 0.0 | 0.0 | 0.0 |
| Spink13    | 0.0 | 0.0 | 0.0 | 0.0 | 0.0 | 0.0 | 0.0 | 0.1 | 0.0 | 0.0 | 0.0 | 0.0 |
| Spink4     | 0.0 | 0.0 | 0.0 | 0.0 | 0.0 | 0.0 | 0.0 | 0.1 | 0.0 | 0.3 | 0.0 | 0.0 |
| Spn-ps     | 0.0 | 0.0 | 0.0 | 0.0 | 0.0 | 0.0 | 0.1 | 0.0 | 0.0 | 0.0 | 0.0 | 0.0 |
| Spock1     | 0.0 | 0.0 | 0.0 | 0.0 | 0.0 | 0.0 | 0.0 | 0.0 | 0.0 | 0.0 | 0.0 | 0.0 |
| Sppl2c     | 0.0 | 0.0 | 0.0 | 0.0 | 0.0 | 0.0 | 0.0 | 0.0 | 0.0 | 0.0 | 0.0 | 0.0 |
| Sprr2b     | 0.0 | 0.0 | 0.0 | 0.3 | 0.0 | 0.0 | 0.0 | 0.0 | 0.0 | 0.0 | 0.0 | 0.0 |
| Sprr2g     | 0.1 | 0.0 | 0.0 | 0.0 | 0.1 | 0.0 | 0.0 | 0.0 | 0.0 | 0.1 | 0.0 | 0.0 |
| Sprr2j-ps  | 0.0 | 0.0 | 0.2 | 0.0 | 0.0 | 0.0 | 0.0 | 0.0 | 0.0 | 0.0 | 0.0 | 0.0 |
| Sprr2k     | 0.1 | 0.0 | 0.0 | 0.0 | 0.0 | 0.0 | 0.0 | 0.1 | 0.0 | 0.0 | 0.2 | 0.0 |
| Sptlc3     | 0.0 | 0.0 | 0.0 | 0.0 | 0.0 | 0.0 | 0.0 | 0.0 | 0.0 | 0.0 | 0.0 | 0.0 |
| Srd5a2     | 0.3 | 0.0 | 0.0 | 0.0 | 0.0 | 0.0 | 0.0 | 0.0 | 0.0 | 0.1 | 0.0 | 0.0 |
| Sstr1      | 0.0 | 0.0 | 0.0 | 0.0 | 0.0 | 0.0 | 0.0 | 0.0 | 0.0 | 0.0 | 0.0 | 0.0 |
| Sstr4      | 0.0 | 0.0 | 0.0 | 0.1 | 0.0 | 0.0 | 0.0 | 0.0 | 0.1 | 0.2 | 0.0 | 0.1 |
| Ssty1      | 0.0 | 0.0 | 0.0 | 0.0 | 0.0 | 0.0 | 0.0 | 0.0 | 0.0 | 0.0 | 0.0 | 0.0 |
| Ssty2      | 0.0 | 0.0 | 0.0 | 0.0 | 0.0 | 0.0 | 0.0 | 0.0 | 0.0 | 0.0 | 0.0 | 0.0 |
| Ssx9       | 0.0 | 0.0 | 0.0 | 0.0 | 0.0 | 0.0 | 0.0 | 0.0 | 0.0 | 0.0 | 0.0 | 0.0 |
| Ssxb6      | 0.0 | 0.0 | 0.0 | 0.0 | 0.0 | 0.0 | 0.0 | 0.0 | 0.0 | 0.0 | 0.0 | 0.0 |
| St6gal2    | 0.0 | 0.0 | 0.0 | 0.0 | 0.0 | 0.0 | 0.0 | 0.0 | 0.0 | 0.0 | 0.0 | 0.0 |
| St8sia3    | 0.0 | 0.0 | 0.0 | 0.0 | 0.0 | 0.0 | 0.0 | 0.0 | 0.0 | 0.0 | 0.0 | 0.0 |
| St8sia5    | 0.0 | 0.0 | 0.0 | 0.0 | 0.0 | 0.0 | 0.0 | 0.0 | 0.0 | 0.0 | 0.0 | 0.0 |
| Stfa1      | 0.0 | 0.0 | 0.0 | 0.0 | 0.0 | 0.2 | 0.0 | 0.0 | 0.0 | 0.0 | 0.0 | 0.0 |
| Stfa2      | 0.0 | 0.0 | 0.0 | 0.0 | 0.0 | 0.0 | 0.0 | 0.0 | 0.0 | 0.0 | 0.0 | 0.1 |
| Stmn3      | 0.0 | 0.0 | 0.0 | 0.0 | 0.0 | 0.0 | 0.1 | 0.0 | 0.0 | 0.0 | 0.1 | 0.0 |
| Stoml3     | 0.0 | 0.0 | 0.0 | 0.0 | 0.0 | 0.0 | 0.0 | 0.0 | 0.0 | 0.0 | 0.0 | 0.0 |
| Stra8      | 0.0 | 0.0 | 0.0 | 0.0 | 0.0 | 0.1 | 0.0 | 0.0 | 0.0 | 0.0 | 0.0 | 0.0 |
| Strc       | 0.0 | 0.0 | 0.0 | 0.0 | 0.0 | 0.0 | 0.0 | 0.0 | 0.0 | 0.0 | 0.0 | 0.0 |
| Sult1b1    | 0.0 | 0.0 | 0.0 | 0.0 | 0.0 | 0.0 | 0.0 | 0.0 | 0.0 | 0.0 | 0.0 | 0.0 |
| Sult1c1    | 0.0 | 0.0 | 0.0 | 0.0 | 0.0 | 0.0 | 0.0 | 0.0 | 0.0 | 0.0 | 0.0 | 0.0 |
| Sult1d1    | 0.0 | 0.0 | 0.0 | 0.0 | 0.0 | 0.0 | 0.0 | 0.0 | 0.0 | 0.0 | 0.0 | 0.0 |
| Sult1e1    | 0.0 | 0.0 | 0.0 | 0.0 | 0.0 | 0.0 | 0.0 | 0.0 | 0.1 | 0.0 | 0.0 | 0.0 |
| Sult2a5    | 0.0 | 0.0 | 0.0 | 0.0 | 0.0 | 0.0 | 0.0 | 0.0 | 0.0 | 0.0 | 0.0 | 0.0 |
| Sult2a6    | 0.0 | 0.0 | 0.1 | 0.0 | 0.0 | 0.1 | 0.0 | 0.0 | 0.0 | 0.0 | 0.0 | 0.1 |
| Sult2a7    | 0.0 | 0.0 | 0.0 | 0.0 | 0.0 | 0.1 | 0.0 | 0.0 | 0.0 | 0.0 | 0.0 | 0.0 |

Excluded Genes

|          |     |     |     |     |     |     |     |     |     |     |     |     |
|----------|-----|-----|-----|-----|-----|-----|-----|-----|-----|-----|-----|-----|
| Sun3     | 0.0 | 0.0 | 0.0 | 0.0 | 0.0 | 0.0 | 0.0 | 0.0 | 0.0 | 0.1 | 0.0 | 0.0 |
| Svs1     | 0.0 | 0.0 | 0.0 | 0.0 | 0.0 | 0.0 | 0.0 | 0.0 | 0.0 | 0.0 | 0.0 | 0.0 |
| Svs2     | 0.0 | 0.0 | 0.0 | 0.0 | 0.0 | 0.0 | 0.0 | 0.0 | 0.0 | 0.0 | 0.0 | 0.0 |
| Svs3b    | 0.0 | 0.0 | 0.0 | 0.0 | 0.0 | 0.0 | 0.0 | 0.0 | 0.0 | 0.0 | 0.0 | 0.0 |
| Syce1l   | 0.0 | 0.0 | 0.0 | 0.0 | 0.0 | 0.0 | 0.0 | 0.0 | 0.0 | 0.1 | 0.0 | 0.0 |
| Syt10    | 0.1 | 0.0 | 0.0 | 0.0 | 0.0 | 0.0 | 0.0 | 0.0 | 0.0 | 0.0 | 0.0 | 0.0 |
| Syt16    | 0.0 | 0.0 | 0.0 | 0.0 | 0.0 | 0.0 | 0.0 | 0.0 | 0.0 | 0.0 | 0.0 | 0.0 |
| Syt2     | 0.0 | 0.0 | 0.0 | 0.0 | 0.0 | 0.0 | 0.0 | 0.0 | 0.0 | 0.0 | 0.0 | 0.0 |
| T        | 0.0 | 0.0 | 0.0 | 0.0 | 0.0 | 0.0 | 0.0 | 0.0 | 0.0 | 0.0 | 0.0 | 0.0 |
| Taar2    | 0.0 | 0.0 | 0.0 | 0.0 | 0.0 | 0.0 | 0.0 | 0.0 | 0.0 | 0.0 | 0.0 | 0.0 |
| Taar5    | 0.0 | 0.0 | 0.0 | 0.0 | 0.0 | 0.0 | 0.0 | 0.0 | 0.0 | 0.0 | 0.0 | 0.0 |
| Taar8b   | 0.0 | 0.0 | 0.0 | 0.0 | 0.0 | 0.0 | 0.0 | 0.0 | 0.0 | 0.0 | 0.0 | 0.0 |
| Taar8c   | 0.0 | 0.0 | 0.0 | 0.0 | 0.0 | 0.0 | 0.0 | 0.0 | 0.0 | 0.0 | 0.0 | 0.0 |
| Tac1     | 0.0 | 0.0 | 0.0 | 0.0 | 0.0 | 0.0 | 0.0 | 0.1 | 0.0 | 0.0 | 0.0 | 0.0 |
| Tac2     | 0.0 | 0.0 | 0.1 | 0.0 | 0.0 | 0.0 | 0.0 | 0.0 | 0.0 | 0.0 | 0.0 | 0.0 |
| Tacr1    | 0.0 | 0.0 | 0.0 | 0.0 | 0.0 | 0.0 | 0.0 | 0.0 | 0.0 | 0.0 | 0.0 | 0.0 |
| Tacr2    | 0.0 | 0.0 | 0.0 | 0.0 | 0.0 | 0.0 | 0.0 | 0.0 | 0.0 | 0.0 | 0.0 | 0.0 |
| Tacr3    | 0.0 | 0.0 | 0.0 | 0.0 | 0.0 | 0.0 | 0.0 | 0.0 | 0.0 | 0.0 | 0.0 | 0.0 |
| Tacstd2  | 0.0 | 0.0 | 0.0 | 0.0 | 0.0 | 0.0 | 0.0 | 0.0 | 0.0 | 0.0 | 0.0 | 0.0 |
| Tas1r2   | 0.0 | 0.0 | 0.0 | 0.0 | 0.0 | 0.0 | 0.0 | 0.0 | 0.0 | 0.1 | 0.0 | 0.0 |
| Tas2r124 | 0.0 | 0.0 | 0.0 | 0.0 | 0.0 | 0.0 | 0.0 | 0.0 | 0.0 | 0.0 | 0.0 | 0.0 |
| Tas2r126 | 0.0 | 0.0 | 0.0 | 0.0 | 0.0 | 0.0 | 0.0 | 0.0 | 0.0 | 0.1 | 0.1 | 0.0 |
| Tas2r138 | 0.0 | 0.0 | 0.0 | 0.0 | 0.0 | 0.1 | 0.0 | 0.0 | 0.0 | 0.0 | 0.0 | 0.0 |
| Tas2r143 | 0.0 | 0.0 | 0.0 | 0.0 | 0.0 | 0.0 | 0.1 | 0.0 | 0.0 | 0.0 | 0.1 | 0.0 |
| Tas2r144 | 0.0 | 0.0 | 0.0 | 0.0 | 0.0 | 0.0 | 0.0 | 0.0 | 0.0 | 0.0 | 0.0 | 0.0 |
| Tbc1d21  | 0.0 | 0.0 | 0.0 | 0.0 | 0.0 | 0.0 | 0.0 | 0.0 | 0.0 | 0.0 | 0.0 | 0.0 |
| Tbpl2    | 0.0 | 0.0 | 0.0 | 0.0 | 0.0 | 0.0 | 0.0 | 0.0 | 0.0 | 0.0 | 0.0 | 0.0 |
| Tbr1     | 0.0 | 0.0 | 0.0 | 0.0 | 0.0 | 0.0 | 0.0 | 0.0 | 0.0 | 0.0 | 0.0 | 0.0 |
| Tbx19    | 0.0 | 0.0 | 0.0 | 0.0 | 0.0 | 0.0 | 0.0 | 0.0 | 0.0 | 0.0 | 0.0 | 0.0 |
| Tcap     | 0.0 | 0.0 | 0.0 | 0.0 | 0.0 | 0.0 | 0.0 | 0.0 | 0.0 | 0.0 | 0.0 | 0.0 |
| Tdgf1    | 0.0 | 0.0 | 0.0 | 0.0 | 0.0 | 0.0 | 0.0 | 0.0 | 0.0 | 0.0 | 0.0 | 0.0 |
| Tdh      | 0.0 | 0.0 | 0.0 | 0.0 | 0.0 | 0.0 | 0.0 | 0.0 | 0.0 | 0.0 | 0.0 | 0.0 |
| Tdpoz1   | 0.0 | 0.0 | 0.0 | 0.0 | 0.0 | 0.0 | 0.0 | 0.0 | 0.0 | 0.0 | 0.0 | 0.0 |
| Tdpoz3   | 0.1 | 0.0 | 0.0 | 0.0 | 0.0 | 0.0 | 0.0 | 0.0 | 0.0 | 0.0 | 0.0 | 0.0 |
| Tecrl    | 0.0 | 0.0 | 0.0 | 0.0 | 0.0 | 0.0 | 0.0 | 0.0 | 0.0 | 0.0 | 0.0 | 0.0 |
| Teddm1   | 0.0 | 0.0 | 0.0 | 0.0 | 0.0 | 0.0 | 0.0 | 0.0 | 0.0 | 0.0 | 0.0 | 0.0 |
| Tekt1    | 0.0 | 0.0 | 0.0 | 0.0 | 0.0 | 0.0 | 0.1 | 0.0 | 0.0 | 0.0 | 0.0 | 0.0 |
| Tekt3    | 0.0 | 0.0 | 0.0 | 0.1 | 0.0 | 0.0 | 0.0 | 0.0 | 0.0 | 0.0 | 0.0 | 0.0 |
| Tepp     | 0.1 | 0.0 | 0.0 | 0.0 | 0.0 | 0.0 | 0.0 | 0.1 | 0.0 | 0.0 | 0.0 | 0.0 |
| Tescl    | 0.0 | 0.0 | 0.0 | 0.0 | 0.0 | 0.0 | 0.0 | 0.0 | 0.0 | 0.0 | 0.0 | 0.0 |
| Tex101   | 0.0 | 0.0 | 0.0 | 0.0 | 0.0 | 0.0 | 0.0 | 0.0 | 0.0 | 0.0 | 0.0 | 0.0 |
| Tex12    | 0.1 | 0.0 | 0.0 | 0.0 | 0.1 | 0.0 | 0.0 | 0.0 | 0.0 | 0.0 | 0.0 | 0.1 |
| Tex13    | 0.0 | 0.0 | 0.0 | 0.0 | 0.0 | 0.0 | 0.0 | 0.0 | 0.0 | 0.0 | 0.0 | 0.0 |
| Tex16    | 0.0 | 0.0 | 0.0 | 0.0 | 0.0 | 0.0 | 0.0 | 0.0 | 0.0 | 0.0 | 0.0 | 0.0 |
| Tex21    | 0.0 | 0.0 | 0.0 | 0.0 | 0.0 | 0.0 | 0.0 | 0.0 | 0.0 | 0.0 | 0.0 | 0.1 |
| Tex24    | 0.0 | 0.0 | 0.0 | 0.0 | 0.0 | 0.0 | 0.0 | 0.0 | 0.0 | 0.0 | 0.0 | 0.0 |
| Tex29    | 0.0 | 0.0 | 0.0 | 0.0 | 0.0 | 0.0 | 0.0 | 0.0 | 0.1 | 0.1 | 0.0 | 0.0 |
| Tex33    | 0.0 | 0.0 | 0.0 | 0.0 | 0.0 | 0.0 | 0.0 | 0.0 | 0.0 | 0.0 | 0.0 | 0.0 |
| Tex37    | 0.0 | 0.0 | 0.0 | 0.0 | 0.0 | 0.0 | 0.0 | 0.0 | 0.0 | 0.0 | 0.0 | 0.0 |
| Tex40    | 0.1 | 0.0 | 0.0 | 0.0 | 0.0 | 0.0 | 0.0 | 0.0 | 0.0 | 0.1 | 0.0 | 0.0 |
| Tfap2b   | 0.0 | 0.0 | 0.0 | 0.0 | 0.0 | 0.0 | 0.0 | 0.0 | 0.0 | 0.0 | 0.0 | 0.0 |
| Tfap2c   | 0.0 | 0.0 | 0.0 | 0.0 | 0.0 | 0.0 | 0.0 | 0.0 | 0.0 | 0.0 | 0.0 | 0.0 |
| Tff1     | 0.0 | 0.0 | 0.1 | 0.0 | 0.0 | 0.0 | 0.0 | 0.0 | 0.0 | 0.0 | 0.0 | 0.0 |
| Tgm5     | 0.0 | 0.0 | 0.0 | 0.0 | 0.0 | 0.0 | 0.0 | 0.0 | 0.0 | 0.0 | 0.0 | 0.0 |
| Tgm6     | 0.0 | 0.0 | 0.0 | 0.0 | 0.0 | 0.0 | 0.0 | 0.0 | 0.0 | 0.0 | 0.0 | 0.0 |
| Tgm7     | 0.0 | 0.0 | 0.0 | 0.0 | 0.0 | 0.0 | 0.0 | 0.0 | 0.0 | 0.0 | 0.0 | 0.0 |
| Th       | 0.0 | 0.0 | 0.0 | 0.0 | 0.0 | 0.0 | 0.0 | 0.0 | 0.0 | 0.0 | 0.0 | 0.0 |

Excluded Genes

|           |     |     |     |     |     |     |     |     |     |     |     |     |
|-----------|-----|-----|-----|-----|-----|-----|-----|-----|-----|-----|-----|-----|
| Theg      | 0.0 | 0.0 | 0.0 | 0.0 | 0.0 | 0.0 | 0.0 | 0.0 | 0.0 | 0.0 | 0.0 | 0.0 |
| Them5     | 0.1 | 0.0 | 0.0 | 0.0 | 0.0 | 0.0 | 0.0 | 0.0 | 0.0 | 0.0 | 0.0 | 0.0 |
| Themis3   | 0.0 | 0.0 | 0.0 | 0.0 | 0.0 | 0.0 | 0.0 | 0.0 | 0.0 | 0.0 | 0.0 | 0.0 |
| Timd2     | 0.0 | 0.0 | 0.0 | 0.0 | 0.0 | 0.0 | 0.0 | 0.0 | 0.0 | 0.0 | 0.0 | 0.0 |
| Timd4     | 0.0 | 0.0 | 0.0 | 0.0 | 0.0 | 0.0 | 0.0 | 0.0 | 0.0 | 0.0 | 0.0 | 0.0 |
| Timm8a2   | 0.0 | 0.0 | 0.0 | 0.0 | 0.0 | 0.0 | 0.0 | 0.0 | 0.0 | 0.0 | 0.1 | 0.0 |
| Tinag     | 0.0 | 0.0 | 0.0 | 0.0 | 0.0 | 0.0 | 0.0 | 0.0 | 0.0 | 0.0 | 0.0 | 0.0 |
| Tktl2     | 0.0 | 0.0 | 0.0 | 0.0 | 0.0 | 0.0 | 0.0 | 0.0 | 0.0 | 0.0 | 0.0 | 0.0 |
| Tlx1      | 0.0 | 0.0 | 0.0 | 0.1 | 0.0 | 0.0 | 0.0 | 0.0 | 0.0 | 0.0 | 0.0 | 0.0 |
| Tlx2      | 0.1 | 0.0 | 0.0 | 0.0 | 0.0 | 0.0 | 0.0 | 0.0 | 0.0 | 0.0 | 0.0 | 0.0 |
| Tlx3      | 0.0 | 0.0 | 0.0 | 0.0 | 0.0 | 0.0 | 0.0 | 0.0 | 0.0 | 0.0 | 0.0 | 0.0 |
| Tm4sf5    | 0.0 | 0.0 | 0.0 | 0.0 | 0.1 | 0.1 | 0.0 | 0.0 | 0.0 | 0.0 | 0.0 | 0.0 |
| Tmc1      | 0.0 | 0.0 | 0.0 | 0.0 | 0.0 | 0.0 | 0.0 | 0.0 | 0.0 | 0.0 | 0.0 | 0.0 |
| Tmc2      | 0.0 | 0.0 | 0.0 | 0.0 | 0.0 | 0.0 | 0.0 | 0.0 | 0.0 | 0.0 | 0.0 | 0.0 |
| Tmco2     | 0.0 | 0.0 | 0.0 | 0.0 | 0.0 | 0.1 | 0.0 | 0.0 | 0.0 | 0.0 | 0.0 | 0.0 |
| Tmed6     | 0.0 | 0.1 | 0.0 | 0.0 | 0.0 | 0.0 | 0.0 | 0.0 | 0.0 | 0.0 | 0.0 | 0.0 |
| Tmem102   | 0.0 | 0.0 | 0.0 | 0.0 | 0.0 | 0.0 | 0.0 | 0.0 | 0.0 | 0.0 | 0.0 | 0.0 |
| Tmem139   | 0.0 | 0.0 | 0.1 | 0.0 | 0.0 | 0.0 | 0.0 | 0.0 | 0.0 | 0.0 | 0.0 | 0.0 |
| Tmem182   | 0.0 | 0.0 | 0.0 | 0.0 | 0.0 | 0.0 | 0.0 | 0.0 | 0.0 | 0.0 | 0.0 | 0.0 |
| Tmem190   | 0.0 | 0.0 | 0.0 | 0.0 | 0.0 | 0.0 | 0.0 | 0.1 | 0.0 | 0.1 | 0.0 | 0.1 |
| Tmem196   | 0.0 | 0.0 | 0.0 | 0.0 | 0.0 | 0.0 | 0.1 | 0.0 | 0.0 | 0.0 | 0.0 | 0.0 |
| Tmem210   | 0.0 | 0.0 | 0.0 | 0.0 | 0.1 | 0.0 | 0.0 | 0.0 | 0.0 | 0.2 | 0.0 | 0.0 |
| Tmem212   | 0.1 | 0.0 | 0.0 | 0.0 | 0.0 | 0.2 | 0.0 | 0.1 | 0.0 | 0.0 | 0.0 | 0.0 |
| Tmem233   | 0.0 | 0.1 | 0.0 | 0.0 | 0.0 | 0.0 | 0.0 | 0.0 | 0.0 | 0.0 | 0.0 | 0.0 |
| Tmem235   | 0.0 | 0.0 | 0.0 | 0.0 | 0.0 | 0.0 | 0.0 | 0.0 | 0.0 | 0.0 | 0.0 | 0.0 |
| Tmem247   | 0.0 | 0.1 | 0.0 | 0.0 | 0.0 | 0.0 | 0.0 | 0.0 | 0.0 | 0.0 | 0.0 | 0.0 |
| Tmem252   | 0.0 | 0.0 | 0.0 | 0.0 | 0.0 | 0.0 | 0.0 | 0.0 | 0.0 | 0.0 | 0.0 | 0.0 |
| Tmem28    | 0.1 | 0.0 | 0.0 | 0.0 | 0.0 | 0.0 | 0.0 | 0.0 | 0.0 | 0.0 | 0.0 | 0.0 |
| Tmem30c   | 0.0 | 0.0 | 0.0 | 0.0 | 0.0 | 0.0 | 0.0 | 0.0 | 0.0 | 0.0 | 0.0 | 0.0 |
| Tmprss11a | 0.0 | 0.0 | 0.0 | 0.0 | 0.0 | 0.0 | 0.0 | 0.0 | 0.0 | 0.0 | 0.0 | 0.0 |
| Tmprss11c | 0.0 | 0.0 | 0.0 | 0.0 | 0.0 | 0.0 | 0.0 | 0.0 | 0.0 | 0.0 | 0.0 | 0.0 |
| Tmprss11d | 0.0 | 0.0 | 0.0 | 0.0 | 0.0 | 0.0 | 0.0 | 0.0 | 0.0 | 0.0 | 0.0 | 0.0 |
| Tmprss11g | 0.0 | 0.0 | 0.0 | 0.0 | 0.0 | 0.0 | 0.0 | 0.0 | 0.0 | 0.0 | 0.0 | 0.0 |
| Tmprss12  | 0.0 | 0.0 | 0.0 | 0.0 | 0.0 | 0.0 | 0.0 | 0.0 | 0.0 | 0.0 | 0.0 | 0.0 |
| Tmprss13  | 0.0 | 0.0 | 0.0 | 0.0 | 0.0 | 0.0 | 0.0 | 0.0 | 0.0 | 0.0 | 0.0 | 0.0 |
| Tmprss15  | 0.0 | 0.0 | 0.0 | 0.0 | 0.0 | 0.0 | 0.0 | 0.0 | 0.0 | 0.1 | 0.0 | 0.0 |
| Tmsb15a   | 0.0 | 0.7 | 0.0 | 0.0 | 0.0 | 0.0 | 0.0 | 0.0 | 0.4 | 0.0 | 0.0 | 0.0 |
| Tnni2     | 0.1 | 0.0 | 0.1 | 0.2 | 0.3 | 0.0 | 0.0 | 0.1 | 0.0 | 0.1 | 0.0 | 0.0 |
| Tnp2      | 0.0 | 0.0 | 0.1 | 0.0 | 0.0 | 0.0 | 0.0 | 0.0 | 0.0 | 0.0 | 0.0 | 0.0 |
| Topaz1    | 0.0 | 0.0 | 0.0 | 0.0 | 0.0 | 0.0 | 0.0 | 0.0 | 0.0 | 0.0 | 0.0 | 0.0 |
| Tox2      | 0.0 | 0.0 | 0.0 | 0.0 | 0.0 | 0.0 | 0.0 | 0.0 | 0.1 | 0.0 | 0.0 | 0.0 |
| Tox3      | 0.0 | 0.0 | 0.0 | 0.1 | 0.0 | 0.0 | 0.0 | 0.0 | 0.0 | 0.0 | 0.0 | 0.0 |
| Tph1      | 0.0 | 0.1 | 0.0 | 0.0 | 0.0 | 0.0 | 0.0 | 0.0 | 0.0 | 0.0 | 0.0 | 0.0 |
| Tpo       | 0.0 | 0.0 | 0.0 | 0.0 | 0.0 | 0.0 | 0.0 | 0.0 | 0.0 | 0.0 | 0.0 | 0.0 |
| Tppp2     | 0.0 | 0.0 | 0.1 | 0.0 | 0.0 | 0.0 | 0.0 | 0.0 | 0.0 | 0.0 | 0.0 | 0.0 |
| Tprg      | 0.0 | 0.0 | 0.0 | 0.0 | 0.0 | 0.0 | 0.0 | 0.0 | 0.0 | 0.0 | 0.0 | 0.0 |
| Tpsg1     | 0.0 | 0.0 | 0.0 | 0.0 | 0.0 | 0.0 | 0.0 | 0.0 | 0.0 | 0.0 | 0.0 | 0.0 |
| Trap1a    | 0.0 | 0.0 | 0.0 | 0.0 | 0.0 | 0.0 | 0.0 | 0.0 | 0.0 | 0.0 | 0.1 | 0.0 |
| Trat1     | 0.0 | 0.1 | 0.0 | 0.0 | 0.0 | 0.0 | 0.0 | 0.0 | 0.0 | 0.0 | 0.0 | 0.0 |
| Treh      | 0.0 | 0.0 | 0.0 | 0.0 | 0.0 | 0.0 | 0.0 | 0.0 | 0.0 | 0.0 | 0.0 | 0.0 |
| Trem1     | 0.0 | 0.0 | 0.0 | 0.0 | 0.0 | 0.0 | 0.0 | 0.0 | 0.0 | 0.0 | 0.1 | 0.0 |
| Trem2     | 0.0 | 0.0 | 0.0 | 0.0 | 0.0 | 0.0 | 0.0 | 0.0 | 0.0 | 0.0 | 0.0 | 0.0 |
| Trex2     | 0.0 | 0.0 | 0.0 | 0.0 | 0.0 | 0.0 | 0.0 | 0.0 | 0.0 | 0.0 | 0.0 | 0.0 |
| Trh       | 0.0 | 0.0 | 0.0 | 0.0 | 0.0 | 0.0 | 0.0 | 0.0 | 0.0 | 0.0 | 0.0 | 0.0 |
| Trhde     | 0.0 | 0.0 | 0.0 | 0.0 | 0.0 | 0.0 | 0.0 | 0.0 | 0.0 | 0.0 | 0.0 | 0.0 |
| Trhr      | 0.0 | 0.0 | 0.0 | 0.0 | 0.0 | 0.0 | 0.0 | 0.0 | 0.0 | 0.0 | 0.0 | 0.0 |
| Trhr2     | 0.1 | 0.0 | 0.0 | 0.0 | 0.0 | 0.0 | 0.0 | 0.0 | 0.0 | 0.0 | 0.0 | 0.0 |

Excluded Genes

|             |     |     |     |     |     |     |     |     |     |     |     |     |
|-------------|-----|-----|-----|-----|-----|-----|-----|-----|-----|-----|-----|-----|
| Trim30e-ps1 | 0.0 | 0.0 | 0.0 | 0.0 | 0.0 | 0.0 | 0.0 | 0.0 | 0.0 | 0.0 | 0.0 | 0.0 |
| Trim40      | 0.0 | 0.0 | 0.0 | 0.1 | 0.0 | 0.0 | 0.0 | 0.0 | 0.0 | 0.0 | 0.0 | 0.0 |
| Trim52      | 0.0 | 0.1 | 0.0 | 0.2 | 0.0 | 0.0 | 0.0 | 0.1 | 0.0 | 0.0 | 0.0 | 0.0 |
| Trim67      | 0.0 | 0.0 | 0.0 | 0.0 | 0.0 | 0.0 | 0.0 | 0.0 | 0.0 | 0.0 | 0.0 | 0.0 |
| Triml1      | 0.0 | 0.0 | 0.0 | 0.0 | 0.0 | 0.0 | 0.0 | 0.0 | 0.0 | 0.0 | 0.0 | 0.0 |
| Triml2      | 0.0 | 0.0 | 0.0 | 0.0 | 0.0 | 0.1 | 0.0 | 0.0 | 0.0 | 0.0 | 0.0 | 0.0 |
| Trpa1       | 0.0 | 0.0 | 0.0 | 0.0 | 0.0 | 0.0 | 0.0 | 0.0 | 0.0 | 0.0 | 0.0 | 0.0 |
| Trpc3       | 0.0 | 0.0 | 0.0 | 0.0 | 0.0 | 0.0 | 0.0 | 0.0 | 0.0 | 0.0 | 0.0 | 0.0 |
| Trpc4       | 0.0 | 0.0 | 0.0 | 0.0 | 0.0 | 0.0 | 0.0 | 0.0 | 0.0 | 0.0 | 0.0 | 0.0 |
| Trpd52l3    | 0.0 | 0.0 | 0.0 | 0.0 | 0.0 | 0.0 | 0.0 | 0.0 | 0.0 | 0.0 | 0.0 | 0.0 |
| Trpm1       | 0.0 | 0.0 | 0.0 | 0.0 | 0.0 | 0.0 | 0.0 | 0.0 | 0.0 | 0.0 | 0.0 | 0.0 |
| Trpm8       | 0.0 | 0.0 | 0.0 | 0.0 | 0.0 | 0.0 | 0.0 | 0.0 | 0.0 | 0.0 | 0.0 | 0.0 |
| Try4        | 0.0 | 0.0 | 0.0 | 0.0 | 0.0 | 0.0 | 0.0 | 0.0 | 0.0 | 0.0 | 0.0 | 0.0 |
| Try5        | 0.0 | 0.0 | 0.0 | 0.0 | 0.0 | 0.0 | 0.0 | 0.0 | 0.0 | 0.0 | 0.0 | 0.0 |
| Tsga13      | 0.0 | 0.0 | 0.0 | 0.0 | 0.0 | 0.0 | 0.0 | 0.0 | 0.0 | 0.0 | 0.0 | 0.0 |
| Tshb        | 0.0 | 0.0 | 0.0 | 0.0 | 0.0 | 0.0 | 0.0 | 0.0 | 0.0 | 0.0 | 0.0 | 0.0 |
| Tsix        | 0.0 | 0.0 | 0.0 | 0.0 | 0.0 | 0.0 | 0.0 | 0.0 | 0.0 | 0.0 | 0.0 | 0.0 |
| Tssk5       | 0.0 | 0.0 | 0.0 | 0.0 | 0.0 | 0.0 | 0.0 | 0.0 | 0.0 | 0.0 | 0.0 | 0.0 |
| Tsx         | 0.0 | 0.0 | 0.0 | 0.0 | 0.0 | 0.0 | 0.0 | 0.0 | 0.0 | 0.0 | 0.3 | 0.0 |
| Ttc24       | 0.0 | 0.0 | 0.0 | 0.0 | 0.0 | 0.0 | 0.0 | 0.0 | 0.0 | 0.0 | 0.0 | 0.0 |
| Ttc29       | 0.0 | 0.0 | 0.0 | 0.0 | 0.0 | 0.0 | 0.0 | 0.0 | 0.0 | 0.0 | 0.0 | 0.0 |
| Ttc9b       | 0.0 | 0.0 | 0.0 | 0.1 | 0.0 | 0.0 | 0.0 | 0.0 | 0.0 | 0.0 | 0.0 | 0.0 |
| Ttll10      | 0.0 | 0.0 | 0.0 | 0.0 | 0.0 | 0.0 | 0.0 | 0.0 | 0.0 | 0.0 | 0.0 | 0.0 |
| Ttll6       | 0.0 | 0.0 | 0.0 | 0.0 | 0.0 | 0.0 | 0.1 | 0.0 | 0.0 | 0.0 | 0.0 | 0.0 |
| Ttll8       | 0.0 | 0.0 | 0.0 | 0.0 | 0.0 | 0.0 | 0.0 | 0.0 | 0.0 | 0.0 | 0.0 | 0.0 |
| Ttr         | 0.0 | 0.0 | 0.0 | 0.0 | 0.0 | 0.0 | 0.0 | 0.0 | 0.0 | 0.0 | 0.0 | 0.0 |
| Tuba3a      | 0.0 | 0.0 | 0.0 | 0.0 | 0.0 | 0.0 | 0.0 | 0.0 | 0.0 | 0.0 | 0.0 | 0.0 |
| Tubb1       | 0.1 | 0.0 | 0.0 | 0.2 | 0.0 | 0.0 | 0.0 | 0.0 | 0.0 | 0.0 | 0.0 | 0.0 |
| Tyrp1       | 0.0 | 0.0 | 0.0 | 0.0 | 0.0 | 0.0 | 0.0 | 0.0 | 0.0 | 0.0 | 0.0 | 0.0 |
| U90926      | 0.1 | 0.0 | 0.0 | 0.0 | 0.0 | 0.0 | 0.0 | 0.0 | 0.1 | 0.0 | 0.0 | 0.0 |
| Ubd         | 0.0 | 0.0 | 0.0 | 0.0 | 0.0 | 0.0 | 0.0 | 0.0 | 0.0 | 0.0 | 0.0 | 0.0 |
| Ube2dn12    | 0.0 | 0.0 | 0.0 | 0.0 | 0.0 | 0.0 | 0.0 | 0.0 | 0.0 | 0.0 | 0.2 | 0.0 |
| Ubqln3      | 0.0 | 0.0 | 0.0 | 0.0 | 0.0 | 0.0 | 0.0 | 0.0 | 0.0 | 0.0 | 0.0 | 0.0 |
| Ubqlnl      | 0.0 | 0.0 | 0.0 | 0.0 | 0.0 | 0.0 | 0.0 | 0.0 | 0.0 | 0.0 | 0.0 | 0.0 |
| Ucma        | 0.0 | 0.0 | 0.1 | 0.0 | 0.0 | 0.1 | 0.0 | 0.1 | 0.0 | 0.0 | 0.0 | 0.0 |
| Ucn         | 0.0 | 0.0 | 0.0 | 0.0 | 0.0 | 0.0 | 0.1 | 0.0 | 0.0 | 0.0 | 0.0 | 0.0 |
| Ucp3        | 0.0 | 0.0 | 0.0 | 0.0 | 0.0 | 0.0 | 0.0 | 0.0 | 0.0 | 0.0 | 0.0 | 0.0 |
| Ugt2b1      | 0.0 | 0.0 | 0.0 | 0.0 | 0.0 | 0.0 | 0.0 | 0.0 | 0.0 | 0.0 | 0.0 | 0.0 |
| Ugt2b34     | 0.0 | 0.0 | 0.0 | 0.0 | 0.0 | 0.0 | 0.0 | 0.0 | 0.0 | 0.0 | 0.0 | 0.0 |
| Ugt2b38     | 0.0 | 0.0 | 0.0 | 0.0 | 0.0 | 0.0 | 0.0 | 0.0 | 0.0 | 0.0 | 0.0 | 0.0 |
| Ugt2b5      | 0.0 | 0.0 | 0.0 | 0.0 | 0.0 | 0.0 | 0.0 | 0.0 | 0.0 | 0.0 | 0.0 | 0.0 |
| Ugt3a1      | 0.0 | 0.0 | 0.0 | 0.0 | 0.0 | 0.0 | 0.0 | 0.0 | 0.0 | 0.0 | 0.0 | 0.0 |
| Ugt3a2      | 0.0 | 0.0 | 0.0 | 0.0 | 0.0 | 0.0 | 0.0 | 0.0 | 0.0 | 0.0 | 0.0 | 0.0 |
| Ugt8a       | 0.0 | 0.0 | 0.0 | 0.0 | 0.0 | 0.0 | 0.0 | 0.0 | 0.0 | 0.0 | 0.0 | 0.0 |
| Umod        | 0.0 | 0.0 | 0.0 | 0.0 | 0.0 | 0.0 | 0.0 | 0.0 | 0.0 | 0.0 | 0.0 | 0.0 |
| Umodl1      | 0.0 | 0.0 | 0.0 | 0.0 | 0.0 | 0.0 | 0.0 | 0.0 | 0.0 | 0.0 | 0.0 | 0.0 |
| Uox         | 0.0 | 0.0 | 0.0 | 0.0 | 0.0 | 0.0 | 0.0 | 0.0 | 0.0 | 0.0 | 0.0 | 0.0 |
| Upk2        | 0.0 | 0.0 | 0.0 | 0.0 | 0.1 | 0.0 | 0.0 | 0.0 | 0.0 | 0.0 | 0.0 | 0.0 |
| Upk3a       | 0.0 | 0.0 | 0.0 | 0.1 | 0.0 | 0.0 | 0.0 | 0.0 | 0.0 | 0.0 | 0.0 | 0.0 |
| Usp17lb     | 0.0 | 0.0 | 0.0 | 0.0 | 0.0 | 0.0 | 0.0 | 0.0 | 0.0 | 0.0 | 0.0 | 0.0 |
| Usp17lc     | 0.0 | 0.0 | 0.0 | 0.0 | 0.0 | 0.0 | 0.0 | 0.0 | 0.0 | 0.0 | 0.0 | 0.0 |
| Usp17ld     | 0.0 | 0.0 | 0.0 | 0.0 | 0.0 | 0.0 | 0.0 | 0.0 | 0.0 | 0.0 | 0.0 | 0.0 |
| Usp26       | 0.0 | 0.0 | 0.0 | 0.0 | 0.0 | 0.0 | 0.0 | 0.0 | 0.0 | 0.0 | 0.0 | 0.0 |
| Usp43       | 0.0 | 0.0 | 0.0 | 0.0 | 0.0 | 0.0 | 0.0 | 0.0 | 0.0 | 0.0 | 0.0 | 0.0 |
| Uts2        | 0.0 | 0.0 | 0.0 | 0.0 | 0.0 | 0.0 | 0.0 | 0.0 | 0.0 | 0.1 | 0.0 | 0.0 |
| Uts2d       | 0.0 | 0.0 | 0.0 | 0.0 | 0.0 | 0.0 | 0.0 | 0.0 | 0.0 | 0.0 | 0.0 | 0.0 |
| V1ra8       | 0.0 | 0.0 | 0.0 | 0.0 | 0.0 | 0.0 | 0.0 | 0.0 | 0.0 | 0.0 | 0.0 | 0.0 |

Excluded Genes







|             |     |     |     |     |     |     |     |     |     |     |     |     |
|-------------|-----|-----|-----|-----|-----|-----|-----|-----|-----|-----|-----|-----|
| Vmn2r95     | 0.0 | 0.0 | 0.0 | 0.0 | 0.0 | 0.0 | 0.0 | 0.0 | 0.0 | 0.0 | 0.0 | 0.0 |
| Vmn2r-ps11  | 0.0 | 0.0 | 0.0 | 0.0 | 0.0 | 0.0 | 0.0 | 0.0 | 0.0 | 0.0 | 0.0 | 0.0 |
| Vmn2r-ps159 | 0.0 | 0.0 | 0.0 | 0.0 | 0.0 | 0.0 | 0.0 | 0.0 | 0.0 | 0.0 | 0.0 | 0.0 |
| Vmn2r-ps54  | 0.0 | 0.0 | 0.0 | 0.0 | 0.0 | 0.0 | 0.0 | 0.0 | 0.0 | 0.0 | 0.0 | 0.0 |
| Vsig1       | 0.0 | 0.0 | 0.0 | 0.0 | 0.0 | 0.0 | 0.0 | 0.0 | 0.0 | 0.0 | 0.0 | 0.0 |
| Vsig2       | 0.0 | 0.0 | 0.0 | 0.0 | 0.0 | 0.0 | 0.0 | 0.0 | 0.1 | 0.0 | 0.0 | 0.0 |
| Vsig4       | 0.0 | 0.0 | 0.0 | 0.0 | 0.0 | 0.0 | 0.0 | 0.0 | 0.0 | 0.0 | 0.0 | 0.0 |
| Vsnl1       | 0.0 | 0.0 | 0.0 | 0.0 | 0.0 | 0.0 | 0.0 | 0.0 | 0.0 | 0.0 | 0.0 | 0.0 |
| Vstm2l      | 0.0 | 0.0 | 0.0 | 0.0 | 0.0 | 0.0 | 0.0 | 0.0 | 0.0 | 0.0 | 0.0 | 0.0 |
| Vsx2        | 0.0 | 0.0 | 0.0 | 0.0 | 0.0 | 0.0 | 0.0 | 0.0 | 0.0 | 0.0 | 0.0 | 0.0 |
| Vwa5b1      | 0.0 | 0.0 | 0.0 | 0.0 | 0.0 | 0.0 | 0.0 | 0.0 | 0.0 | 0.0 | 0.0 | 0.0 |
| Vwc2        | 0.0 | 0.0 | 0.0 | 0.0 | 0.0 | 0.0 | 0.0 | 0.0 | 0.0 | 0.0 | 0.0 | 0.0 |
| Vwc2l       | 0.0 | 0.0 | 0.0 | 0.0 | 0.0 | 0.0 | 0.0 | 0.0 | 0.0 | 0.0 | 0.0 | 0.0 |
| Vwde        | 0.0 | 0.0 | 0.0 | 0.0 | 0.0 | 0.0 | 0.0 | 0.0 | 0.0 | 0.0 | 0.0 | 0.0 |
| Wap         | 0.0 | 0.0 | 0.0 | 0.0 | 0.0 | 0.0 | 0.0 | 0.0 | 0.0 | 0.0 | 0.0 | 0.0 |
| Wbp2nl      | 0.0 | 0.0 | 0.0 | 0.0 | 0.0 | 0.0 | 0.0 | 0.0 | 0.0 | 0.0 | 0.0 | 0.0 |
| Wbscr25     | 0.0 | 0.0 | 0.0 | 0.0 | 0.0 | 0.0 | 0.0 | 0.0 | 0.0 | 0.0 | 0.0 | 0.0 |
| Wdr64       | 0.0 | 0.0 | 0.0 | 0.0 | 0.0 | 0.0 | 0.0 | 0.0 | 0.0 | 0.0 | 0.0 | 0.0 |
| Wdr86       | 0.0 | 0.0 | 0.0 | 0.0 | 0.0 | 0.0 | 0.0 | 0.0 | 0.0 | 0.0 | 0.0 | 0.0 |
| Wee2        | 0.0 | 0.0 | 0.0 | 0.0 | 0.0 | 0.0 | 0.0 | 0.0 | 0.0 | 0.0 | 0.0 | 0.0 |
| Wfdc13      | 0.0 | 0.0 | 0.0 | 0.0 | 0.0 | 0.0 | 0.0 | 0.0 | 0.0 | 0.0 | 0.0 | 0.0 |
| Wfdc16      | 0.0 | 0.0 | 0.0 | 0.0 | 0.0 | 0.0 | 0.0 | 0.0 | 0.0 | 0.0 | 0.0 | 0.0 |
| Wfdc2       | 0.0 | 0.0 | 0.0 | 0.0 | 0.0 | 0.0 | 0.0 | 0.0 | 0.0 | 0.0 | 0.0 | 0.0 |
| Wfdc6b      | 0.0 | 0.0 | 0.0 | 0.0 | 0.0 | 0.0 | 0.0 | 0.0 | 0.0 | 0.0 | 0.0 | 0.0 |
| Wfdc8       | 0.0 | 0.0 | 0.0 | 0.0 | 0.0 | 0.0 | 0.0 | 0.0 | 0.0 | 0.0 | 0.0 | 0.0 |
| Wisp3       | 0.0 | 0.0 | 0.0 | 0.0 | 0.0 | 0.0 | 0.0 | 0.0 | 0.0 | 0.1 | 0.0 | 0.0 |
| Wnt1        | 0.0 | 0.0 | 0.0 | 0.0 | 0.0 | 0.0 | 0.0 | 0.0 | 0.0 | 0.0 | 0.0 | 0.0 |
| Wnt3a       | 0.0 | 0.0 | 0.0 | 0.0 | 0.0 | 0.0 | 0.0 | 0.0 | 0.0 | 0.0 | 0.0 | 0.0 |
| Wnt7a       | 0.1 | 0.0 | 0.0 | 0.3 | 0.0 | 0.1 | 0.1 | 0.0 | 0.0 | 0.1 | 0.0 | 0.0 |
| Wnt9b       | 0.0 | 0.0 | 0.0 | 0.0 | 0.0 | 0.0 | 0.0 | 0.0 | 0.0 | 0.0 | 0.0 | 0.0 |
| Xkr7        | 0.0 | 0.0 | 0.0 | 0.0 | 0.0 | 0.0 | 0.0 | 0.0 | 0.0 | 0.0 | 0.0 | 0.0 |
| Xkr9        | 0.0 | 0.0 | 0.0 | 0.0 | 0.0 | 0.0 | 0.0 | 0.0 | 0.0 | 0.0 | 0.0 | 0.0 |
| Ybx2        | 0.1 | 0.0 | 0.1 | 0.0 | 0.0 | 0.0 | 0.0 | 0.0 | 0.0 | 0.0 | 0.0 | 0.0 |
| Yipf7       | 0.0 | 0.0 | 0.0 | 0.0 | 0.0 | 0.0 | 0.0 | 0.0 | 0.0 | 0.0 | 0.0 | 0.0 |
| Zar1        | 0.0 | 0.0 | 0.0 | 0.0 | 0.0 | 0.0 | 0.0 | 0.0 | 0.0 | 0.0 | 0.0 | 0.0 |
| Zar1l       | 0.0 | 0.0 | 0.0 | 0.0 | 0.0 | 0.0 | 0.0 | 0.0 | 0.0 | 0.0 | 0.0 | 0.0 |
| Zbbx        | 0.0 | 0.0 | 0.0 | 0.0 | 0.0 | 0.0 | 0.0 | 0.0 | 0.0 | 0.0 | 0.0 | 0.0 |
| Zcchc13     | 0.0 | 0.0 | 0.0 | 0.0 | 0.0 | 0.0 | 0.0 | 0.0 | 0.0 | 0.0 | 0.0 | 0.0 |
| Zcchc16     | 0.0 | 0.0 | 0.0 | 0.0 | 0.0 | 0.0 | 0.0 | 0.0 | 0.0 | 0.0 | 0.0 | 0.0 |
| Zdhhc19     | 0.0 | 0.0 | 0.0 | 0.0 | 0.0 | 0.0 | 0.0 | 0.0 | 0.0 | 0.0 | 0.0 | 0.0 |
| Zdhhc22     | 0.0 | 0.0 | 0.0 | 0.0 | 0.1 | 0.0 | 0.0 | 0.0 | 0.0 | 0.0 | 0.1 | 0.0 |
| Zdhhc23     | 0.1 | 0.0 | 0.0 | 0.0 | 0.0 | 0.0 | 0.0 | 0.0 | 0.0 | 0.0 | 0.0 | 0.0 |
| Zfp352      | 0.0 | 0.0 | 0.0 | 0.0 | 0.0 | 0.0 | 0.0 | 0.0 | 0.0 | 0.0 | 0.0 | 0.0 |
| Zfp366      | 0.0 | 0.0 | 0.0 | 0.0 | 0.0 | 0.0 | 0.0 | 0.0 | 0.0 | 0.0 | 0.0 | 0.0 |
| Zfp36l3     | 0.0 | 0.0 | 0.0 | 0.0 | 0.0 | 0.0 | 0.0 | 0.0 | 0.0 | 0.0 | 0.0 | 0.0 |
| Zfp572      | 0.0 | 0.0 | 0.0 | 0.0 | 0.0 | 0.0 | 0.0 | 0.0 | 0.0 | 0.0 | 0.0 | 0.0 |
| Zfp648      | 0.0 | 0.0 | 0.0 | 0.0 | 0.0 | 0.0 | 0.0 | 0.0 | 0.0 | 0.0 | 0.0 | 0.0 |
| Zfp663      | 0.0 | 0.0 | 0.0 | 0.0 | 0.0 | 0.0 | 0.0 | 0.0 | 0.0 | 0.0 | 0.0 | 0.0 |
| Zfp711      | 0.0 | 0.0 | 0.0 | 0.0 | 0.0 | 0.0 | 0.0 | 0.0 | 0.0 | 0.0 | 0.0 | 0.0 |
| Zfp735      | 0.0 | 0.0 | 0.0 | 0.0 | 0.0 | 0.0 | 0.0 | 0.0 | 0.0 | 0.0 | 0.0 | 0.0 |
| Zfp804a     | 0.0 | 0.0 | 0.0 | 0.0 | 0.0 | 0.0 | 0.0 | 0.0 | 0.0 | 0.0 | 0.0 | 0.0 |
| Zfp819      | 0.0 | 0.0 | 0.0 | 0.0 | 0.0 | 0.0 | 0.1 | 0.0 | 0.0 | 0.0 | 0.0 | 0.0 |
| Zfp831      | 0.0 | 0.0 | 0.0 | 0.0 | 0.0 | 0.0 | 0.0 | 0.0 | 0.0 | 0.0 | 0.0 | 0.0 |
| Zfy1        | 0.0 | 0.0 | 0.0 | 0.0 | 0.0 | 0.0 | 0.0 | 0.0 | 0.0 | 0.0 | 0.0 | 0.0 |
| Zfy2        | 0.0 | 0.0 | 0.0 | 0.0 | 0.0 | 0.0 | 0.0 | 0.0 | 0.0 | 0.0 | 0.0 | 0.0 |
| Zg16        | 0.0 | 0.0 | 0.0 | 0.2 | 0.0 | 0.0 | 0.0 | 0.0 | 0.0 | 0.0 | 0.0 | 0.0 |
| Zic2        | 0.0 | 0.0 | 0.0 | 0.0 | 0.0 | 0.0 | 0.0 | 0.0 | 0.0 | 0.0 | 0.0 | 0.0 |

Excluded Genes





|               |     |     |     |     |     |     |     |     |     |     |     |     |
|---------------|-----|-----|-----|-----|-----|-----|-----|-----|-----|-----|-----|-----|
| 1700074P13Rik | 0.0 | 0.0 | 0.0 | 0.0 | 0.0 | 0.0 | 0.0 | 0.0 | 0.0 | 0.0 | 0.0 | 0.0 |
| 1700080E11Rik | 0.0 | 0.0 | 0.0 | 0.0 | 0.0 | 0.0 | 0.0 | 0.0 | 0.0 | 0.0 | 0.0 | 0.0 |
| 1700080N15Rik | 0.0 | 0.0 | 0.0 | 0.0 | 0.0 | 0.0 | 0.0 | 0.0 | 0.0 | 0.0 | 0.0 | 0.0 |
| 1700080O16Rik | 0.0 | 0.0 | 0.0 | 0.0 | 0.0 | 0.0 | 0.0 | 0.0 | 0.0 | 0.0 | 0.0 | 0.0 |
| 1700081H22Rik | 0.0 | 0.0 | 0.0 | 0.0 | 0.0 | 0.0 | 0.0 | 0.0 | 0.0 | 0.0 | 0.0 | 0.0 |
| 1700084F23Rik | 0.0 | 0.0 | 0.0 | 0.0 | 0.0 | 0.0 | 0.0 | 0.0 | 0.0 | 0.0 | 0.0 | 0.0 |
| 1700085B03Rik | 0.0 | 0.0 | 0.0 | 0.0 | 0.0 | 0.0 | 0.0 | 0.0 | 0.0 | 0.0 | 0.0 | 0.0 |
| 1700091E21Rik | 0.0 | 0.0 | 0.0 | 0.0 | 0.0 | 0.0 | 0.0 | 0.0 | 0.0 | 0.0 | 0.0 | 0.0 |
| 1700092C10Rik | 0.0 | 0.0 | 0.0 | 0.0 | 0.0 | 0.0 | 0.0 | 0.0 | 0.0 | 0.0 | 0.0 | 0.0 |
| 1700092K14Rik | 0.0 | 0.0 | 0.0 | 0.0 | 0.0 | 0.0 | 0.0 | 0.0 | 0.0 | 0.0 | 0.0 | 0.0 |
| 1700094M24Rik | 0.0 | 0.0 | 0.0 | 0.0 | 0.0 | 0.0 | 0.0 | 0.0 | 0.0 | 0.0 | 0.0 | 0.0 |
| 1700095B22Rik | 0.0 | 0.0 | 0.0 | 0.0 | 0.0 | 0.0 | 0.0 | 0.0 | 0.0 | 0.0 | 0.0 | 0.0 |
| 1700101O22Rik | 0.0 | 0.0 | 0.0 | 0.0 | 0.0 | 0.0 | 0.0 | 0.0 | 0.0 | 0.0 | 0.0 | 0.0 |
| 1700106J16Rik | 0.0 | 0.0 | 0.0 | 0.0 | 0.0 | 0.0 | 0.0 | 0.0 | 0.0 | 0.0 | 0.0 | 0.0 |
| 1700109G15Rik | 0.0 | 0.0 | 0.0 | 0.0 | 0.0 | 0.0 | 0.0 | 0.0 | 0.0 | 0.0 | 0.0 | 0.0 |
| 1700109I08Rik | 0.0 | 0.0 | 0.0 | 0.0 | 0.0 | 0.0 | 0.0 | 0.0 | 0.0 | 0.0 | 0.0 | 0.0 |
| 1700110M21Rik | 0.0 | 0.0 | 0.0 | 0.0 | 0.0 | 0.0 | 0.0 | 0.0 | 0.0 | 0.0 | 0.0 | 0.0 |
| 1700120G07Rik | 0.0 | 0.0 | 0.0 | 0.0 | 0.0 | 0.0 | 0.0 | 0.0 | 0.0 | 0.0 | 0.0 | 0.0 |
| 1700121L16Rik | 0.0 | 0.0 | 0.0 | 0.0 | 0.0 | 0.0 | 0.0 | 0.0 | 0.0 | 0.0 | 0.0 | 0.0 |
| 1700121N20Rik | 0.0 | 0.0 | 0.0 | 0.0 | 0.0 | 0.0 | 0.0 | 0.0 | 0.0 | 0.0 | 0.0 | 0.0 |
| 1700123O12Rik | 0.0 | 0.0 | 0.0 | 0.0 | 0.0 | 0.0 | 0.0 | 0.0 | 0.0 | 0.0 | 0.0 | 0.0 |
| 1700125G02Rik | 0.0 | 0.0 | 0.0 | 0.0 | 0.0 | 0.0 | 0.0 | 0.0 | 0.0 | 0.0 | 0.0 | 0.0 |
| 1700129C05Rik | 0.0 | 0.0 | 0.0 | 0.0 | 0.0 | 0.0 | 0.0 | 0.0 | 0.0 | 0.0 | 0.0 | 0.0 |
| 1810007C17Rik | 0.0 | 0.0 | 0.0 | 0.0 | 0.0 | 0.0 | 0.0 | 0.0 | 0.0 | 0.0 | 0.0 | 0.0 |
| 1810007D17Rik | 0.0 | 0.0 | 0.0 | 0.0 | 0.0 | 0.0 | 0.0 | 0.0 | 0.0 | 0.0 | 0.0 | 0.0 |
| 1810007I06Rik | 0.0 | 0.0 | 0.0 | 0.0 | 0.0 | 0.0 | 0.0 | 0.0 | 0.0 | 0.0 | 0.0 | 0.0 |
| 1810018F18Rik | 0.0 | 0.0 | 0.0 | 0.0 | 0.0 | 0.0 | 0.0 | 0.0 | 0.0 | 0.0 | 0.0 | 0.0 |
| 2200002J24Rik | 0.0 | 0.0 | 0.0 | 0.0 | 0.0 | 0.0 | 0.0 | 0.0 | 0.0 | 0.0 | 0.0 | 0.0 |
| 2210019I11Rik | 0.0 | 0.0 | 0.0 | 0.0 | 0.0 | 0.0 | 0.0 | 0.0 | 0.0 | 0.0 | 0.0 | 0.0 |
| 2210407C18Rik | 0.0 | 0.0 | 0.0 | 0.0 | 0.0 | 0.0 | 0.0 | 0.0 | 0.0 | 0.0 | 0.0 | 0.0 |
| 2210409D07Rik | 0.0 | 0.0 | 0.0 | 0.0 | 0.0 | 0.0 | 0.0 | 0.0 | 0.0 | 0.0 | 0.0 | 0.0 |
| 2300003K06Rik | 0.0 | 0.0 | 0.0 | 0.0 | 0.0 | 0.0 | 0.0 | 0.0 | 0.0 | 0.0 | 0.0 | 0.0 |
| 2310005A03Rik | 0.0 | 0.0 | 0.0 | 0.0 | 0.0 | 0.0 | 0.0 | 0.0 | 0.0 | 0.0 | 0.0 | 0.0 |
| 2310016D03Rik | 0.0 | 0.0 | 0.0 | 0.0 | 0.0 | 0.0 | 0.0 | 0.0 | 0.0 | 0.0 | 0.0 | 0.0 |
| 2310020H05Rik | 0.0 | 0.0 | 0.0 | 0.0 | 0.0 | 0.0 | 0.0 | 0.0 | 0.0 | 0.0 | 0.0 | 0.0 |
| 2310030A07Rik | 0.0 | 0.0 | 0.0 | 0.0 | 0.0 | 0.0 | 0.0 | 0.0 | 0.0 | 0.0 | 0.0 | 0.0 |
| 2310034C09Rik | 0.0 | 0.0 | 0.0 | 0.0 | 0.0 | 0.0 | 0.0 | 0.0 | 0.0 | 0.0 | 0.0 | 0.0 |
| 2310043L19Rik | 0.0 | 0.0 | 0.0 | 0.0 | 0.0 | 0.0 | 0.0 | 0.0 | 0.0 | 0.0 | 0.0 | 0.0 |
| 2310057J18Rik | 0.0 | 0.0 | 0.0 | 0.0 | 0.0 | 0.0 | 0.0 | 0.0 | 0.0 | 0.0 | 0.0 | 0.0 |
| 2310057N15Rik | 0.0 | 0.0 | 0.0 | 0.0 | 0.0 | 0.0 | 0.0 | 0.0 | 0.0 | 0.0 | 0.0 | 0.0 |
| 2310061N02Rik | 0.0 | 0.0 | 0.0 | 0.0 | 0.0 | 0.0 | 0.0 | 0.0 | 0.0 | 0.0 | 0.0 | 0.0 |
| 2310065F04Rik | 0.0 | 0.0 | 0.0 | 0.0 | 0.0 | 0.0 | 0.0 | 0.0 | 0.0 | 0.0 | 0.0 | 0.0 |
| 2310079G19Rik | 0.0 | 0.0 | 0.0 | 0.0 | 0.0 | 0.0 | 0.0 | 0.0 | 0.0 | 0.0 | 0.0 | 0.0 |
| 2410012M07Rik | 0.0 | 0.0 | 0.0 | 0.0 | 0.0 | 0.0 | 0.0 | 0.0 | 0.0 | 0.0 | 0.0 | 0.0 |
| 2410088K16Rik | 0.0 | 0.0 | 0.0 | 0.0 | 0.0 | 0.0 | 0.0 | 0.0 | 0.0 | 0.0 | 0.0 | 0.0 |
| 2410114N07Rik | 0.0 | 0.0 | 0.0 | 0.0 | 0.0 | 0.0 | 0.0 | 0.0 | 0.0 | 0.0 | 0.0 | 0.0 |
| 2410141K09Rik | 0.0 | 0.0 | 0.0 | 0.0 | 0.0 | 0.0 | 0.0 | 0.0 | 0.0 | 0.0 | 0.0 | 0.0 |
| 2610035F20Rik | 0.0 | 0.0 | 0.0 | 0.0 | 0.0 | 0.0 | 0.0 | 0.0 | 0.0 | 0.0 | 0.0 | 0.0 |
| 2810007J24Rik | 0.0 | 0.0 | 0.0 | 0.0 | 0.0 | 0.0 | 0.0 | 0.0 | 0.0 | 0.0 | 0.0 | 0.0 |
| 2810049E08Rik | 0.0 | 0.0 | 0.0 | 0.0 | 0.0 | 0.0 | 0.0 | 0.0 | 0.0 | 0.0 | 0.0 | 0.0 |
| 2900093L17Rik | 0.0 | 0.0 | 0.0 | 0.0 | 0.0 | 0.0 | 0.0 | 0.0 | 0.0 | 0.0 | 0.0 | 0.0 |
| 3110009F21Rik | 0.0 | 0.0 | 0.0 | 0.0 | 0.0 | 0.0 | 0.0 | 0.0 | 0.0 | 0.0 | 0.0 | 0.0 |
| 3110015C05Rik | 0.0 | 0.0 | 0.0 | 0.0 | 0.0 | 0.0 | 0.0 | 0.0 | 0.0 | 0.0 | 0.0 | 0.0 |
| 4732490B19Rik | 0.0 | 0.0 | 0.0 | 0.0 | 0.0 | 0.0 | 0.0 | 0.0 | 0.0 | 0.0 | 0.0 | 0.0 |
| 4921501E09Rik | 0.0 | 0.0 | 0.0 | 0.0 | 0.0 | 0.0 | 0.0 | 0.0 | 0.0 | 0.0 | 0.0 | 0.0 |
| 4921504E06Rik | 0.0 | 0.0 | 0.0 | 0.0 | 0.0 | 0.0 | 0.0 | 0.0 | 0.0 | 0.0 | 0.0 | 0.0 |
| 4921506M07Rik | 0.0 | 0.0 | 0.0 | 0.0 | 0.0 | 0.0 | 0.0 | 0.0 | 0.0 | 0.0 | 0.0 | 0.0 |

Excluded Genes







|               |     |     |     |     |     |     |     |     |     |     |     |     |
|---------------|-----|-----|-----|-----|-----|-----|-----|-----|-----|-----|-----|-----|
| 4930593C16Rik | 0.0 | 0.0 | 0.0 | 0.0 | 0.0 | 0.0 | 0.0 | 0.0 | 0.0 | 0.0 | 0.0 | 0.0 |
| 4930595M18Rik | 0.0 | 0.0 | 0.0 | 0.0 | 0.0 | 0.0 | 0.0 | 0.0 | 0.0 | 0.0 | 0.0 | 0.0 |
| 4930596D02Rik | 0.0 | 0.0 | 0.0 | 0.0 | 0.0 | 0.0 | 0.0 | 0.0 | 0.0 | 0.0 | 0.0 | 0.0 |
| 4930596M17Rik | 0.0 | 0.0 | 0.0 | 0.0 | 0.0 | 0.0 | 0.0 | 0.0 | 0.0 | 0.0 | 0.0 | 0.0 |
| 4930597G03Rik | 0.0 | 0.0 | 0.0 | 0.0 | 0.0 | 0.0 | 0.0 | 0.0 | 0.0 | 0.0 | 0.0 | 0.0 |
| 4930598F16Rik | 0.0 | 0.0 | 0.0 | 0.0 | 0.0 | 0.0 | 0.0 | 0.0 | 0.0 | 0.0 | 0.0 | 0.0 |
| 4931408C20Rik | 0.0 | 0.0 | 0.0 | 0.0 | 0.0 | 0.0 | 0.0 | 0.0 | 0.0 | 0.0 | 0.0 | 0.0 |
| 4931417E11Rik | 0.0 | 0.0 | 0.0 | 0.0 | 0.0 | 0.0 | 0.0 | 0.0 | 0.0 | 0.0 | 0.0 | 0.0 |
| 4931419H13Rik | 0.0 | 0.0 | 0.0 | 0.0 | 0.0 | 0.0 | 0.0 | 0.0 | 0.0 | 0.0 | 0.0 | 0.0 |
| 4931420L22Rik | 0.0 | 0.0 | 0.0 | 0.0 | 0.0 | 0.0 | 0.0 | 0.0 | 0.0 | 0.0 | 0.0 | 0.0 |
| 4931429P17Rik | 0.0 | 0.0 | 0.0 | 0.0 | 0.0 | 0.0 | 0.0 | 0.0 | 0.0 | 0.0 | 0.0 | 0.0 |
| 4931431B13Rik | 0.0 | 0.0 | 0.0 | 0.0 | 0.0 | 0.0 | 0.0 | 0.0 | 0.0 | 0.0 | 0.0 | 0.0 |
| 4931431F19Rik | 0.0 | 0.0 | 0.0 | 0.0 | 0.0 | 0.0 | 0.0 | 0.0 | 0.0 | 0.0 | 0.0 | 0.0 |
| 4932429P05Rik | 0.0 | 0.0 | 0.0 | 0.0 | 0.0 | 0.0 | 0.0 | 0.0 | 0.0 | 0.0 | 0.0 | 0.0 |
| 4932702P03Rik | 0.0 | 0.0 | 0.0 | 0.0 | 0.0 | 0.0 | 0.0 | 0.0 | 0.0 | 0.0 | 0.0 | 0.0 |
| 4933400B14Rik | 0.0 | 0.0 | 0.0 | 0.0 | 0.0 | 0.0 | 0.0 | 0.0 | 0.0 | 0.0 | 0.0 | 0.0 |
| 4933401B06Rik | 0.0 | 0.0 | 0.0 | 0.0 | 0.0 | 0.0 | 0.0 | 0.0 | 0.0 | 0.0 | 0.0 | 0.0 |
| 4933401P06Rik | 0.0 | 0.0 | 0.0 | 0.0 | 0.0 | 0.0 | 0.0 | 0.0 | 0.0 | 0.0 | 0.0 | 0.0 |
| 4933402C06Rik | 0.0 | 0.0 | 0.0 | 0.0 | 0.0 | 0.0 | 0.0 | 0.0 | 0.0 | 0.0 | 0.0 | 0.0 |
| 4933402E13Rik | 0.0 | 0.0 | 0.0 | 0.0 | 0.0 | 0.0 | 0.0 | 0.0 | 0.0 | 0.0 | 0.0 | 0.0 |
| 4933402J10Rik | 0.0 | 0.0 | 0.0 | 0.0 | 0.0 | 0.0 | 0.0 | 0.0 | 0.0 | 0.0 | 0.0 | 0.0 |
| 4933402N03Rik | 0.0 | 0.0 | 0.0 | 0.0 | 0.0 | 0.0 | 0.0 | 0.0 | 0.0 | 0.0 | 0.0 | 0.0 |
| 4933403O08Rik | 0.0 | 0.0 | 0.0 | 0.0 | 0.0 | 0.0 | 0.0 | 0.0 | 0.0 | 0.0 | 0.0 | 0.0 |
| 4933404G15Rik | 0.0 | 0.0 | 0.0 | 0.0 | 0.0 | 0.0 | 0.0 | 0.0 | 0.0 | 0.0 | 0.0 | 0.0 |
| 4933405O20Rik | 0.0 | 0.0 | 0.0 | 0.0 | 0.0 | 0.0 | 0.0 | 0.0 | 0.0 | 0.0 | 0.0 | 0.0 |
| 4933406D12Rik | 0.0 | 0.0 | 0.0 | 0.0 | 0.0 | 0.0 | 0.0 | 0.0 | 0.0 | 0.0 | 0.0 | 0.0 |
| 4933406F09Rik | 0.0 | 0.0 | 0.0 | 0.0 | 0.0 | 0.0 | 0.0 | 0.0 | 0.0 | 0.0 | 0.0 | 0.0 |
| 4933406K04Rik | 0.0 | 0.0 | 0.0 | 0.0 | 0.0 | 0.0 | 0.0 | 0.0 | 0.0 | 0.0 | 0.0 | 0.0 |
| 4933411G06Rik | 0.0 | 0.0 | 0.0 | 0.0 | 0.0 | 0.0 | 0.0 | 0.0 | 0.0 | 0.0 | 0.0 | 0.0 |
| 4933412E24Rik | 0.0 | 0.0 | 0.0 | 0.0 | 0.0 | 0.0 | 0.0 | 0.0 | 0.0 | 0.0 | 0.0 | 0.0 |
| 4933413L06Rik | 0.0 | 0.0 | 0.0 | 0.0 | 0.0 | 0.0 | 0.0 | 0.0 | 0.0 | 0.0 | 0.0 | 0.0 |
| 4933416M06Rik | 0.0 | 0.0 | 0.0 | 0.0 | 0.0 | 0.0 | 0.0 | 0.0 | 0.0 | 0.0 | 0.0 | 0.0 |
| 4933417A18Rik | 0.0 | 0.0 | 0.0 | 0.0 | 0.0 | 0.0 | 0.0 | 0.0 | 0.0 | 0.0 | 0.0 | 0.0 |
| 4933421I07Rik | 0.0 | 0.0 | 0.0 | 0.0 | 0.0 | 0.0 | 0.0 | 0.0 | 0.0 | 0.0 | 0.0 | 0.0 |
| 4933427E13Rik | 0.0 | 0.0 | 0.0 | 0.0 | 0.0 | 0.0 | 0.0 | 0.0 | 0.0 | 0.0 | 0.0 | 0.0 |
| 4933429K18Rik | 0.0 | 0.0 | 0.0 | 0.0 | 0.0 | 0.0 | 0.0 | 0.0 | 0.0 | 0.0 | 0.0 | 0.0 |
| 4933430H16Rik | 0.0 | 0.0 | 0.0 | 0.0 | 0.0 | 0.0 | 0.0 | 0.0 | 0.0 | 0.0 | 0.0 | 0.0 |
| 4933432G23Rik | 0.0 | 0.0 | 0.0 | 0.0 | 0.0 | 0.0 | 0.0 | 0.0 | 0.0 | 0.0 | 0.0 | 0.0 |
| 4933433F19Rik | 0.0 | 0.0 | 0.0 | 0.0 | 0.0 | 0.0 | 0.0 | 0.0 | 0.0 | 0.0 | 0.0 | 0.0 |
| 4933436E23Rik | 0.0 | 0.0 | 0.0 | 0.0 | 0.0 | 0.0 | 0.0 | 0.0 | 0.0 | 0.0 | 0.0 | 0.0 |
| 4933436I01Rik | 0.0 | 0.0 | 0.0 | 0.0 | 0.0 | 0.0 | 0.0 | 0.0 | 0.0 | 0.0 | 0.0 | 0.0 |
| 4933438B17Rik | 0.0 | 0.0 | 0.0 | 0.0 | 0.0 | 0.0 | 0.0 | 0.0 | 0.0 | 0.0 | 0.0 | 0.0 |
| 4933440J02Rik | 0.0 | 0.0 | 0.0 | 0.0 | 0.0 | 0.0 | 0.0 | 0.0 | 0.0 | 0.0 | 0.0 | 0.0 |
| 5430401F13Rik | 0.0 | 0.0 | 0.0 | 0.0 | 0.0 | 0.0 | 0.0 | 0.0 | 0.0 | 0.0 | 0.0 | 0.0 |
| 5430402E10Rik | 0.0 | 0.0 | 0.0 | 0.0 | 0.0 | 0.0 | 0.0 | 0.0 | 0.0 | 0.0 | 0.0 | 0.0 |
| 5430427M07Rik | 0.0 | 0.0 | 0.0 | 0.0 | 0.0 | 0.0 | 0.0 | 0.0 | 0.0 | 0.0 | 0.0 | 0.0 |
| 5430434I15Rik | 0.0 | 0.0 | 0.0 | 0.0 | 0.0 | 0.0 | 0.0 | 0.0 | 0.0 | 0.0 | 0.0 | 0.0 |
| 5530400C23Rik | 0.0 | 0.0 | 0.0 | 0.0 | 0.0 | 0.0 | 0.0 | 0.0 | 0.0 | 0.0 | 0.0 | 0.0 |
| 5530401A14Rik | 0.0 | 0.0 | 0.0 | 0.0 | 0.0 | 0.0 | 0.0 | 0.0 | 0.0 | 0.0 | 0.0 | 0.0 |
| 5730412P04Rik | 0.0 | 0.0 | 0.0 | 0.0 | 0.0 | 0.0 | 0.0 | 0.0 | 0.0 | 0.0 | 0.0 | 0.0 |
| 5730435O14Rik | 0.0 | 0.0 | 0.0 | 0.0 | 0.0 | 0.0 | 0.0 | 0.0 | 0.0 | 0.0 | 0.0 | 0.0 |
| 5730457N03Rik | 0.0 | 0.0 | 0.0 | 0.0 | 0.0 | 0.0 | 0.0 | 0.0 | 0.0 | 0.0 | 0.0 | 0.0 |
| 5730460C07Rik | 0.0 | 0.0 | 0.0 | 0.0 | 0.0 | 0.0 | 0.0 | 0.0 | 0.0 | 0.0 | 0.0 | 0.0 |
| 5730488B01Rik | 0.0 | 0.0 | 0.0 | 0.0 | 0.0 | 0.0 | 0.0 | 0.0 | 0.0 | 0.0 | 0.0 | 0.0 |
| 6530411M01Rik | 0.0 | 0.0 | 0.0 | 0.0 | 0.0 | 0.0 | 0.0 | 0.0 | 0.0 | 0.0 | 0.0 | 0.0 |
| 7420426K07Rik | 0.0 | 0.0 | 0.0 | 0.0 | 0.0 | 0.0 | 0.0 | 0.0 | 0.0 | 0.0 | 0.0 | 0.0 |
| 7420701I03Rik | 0.0 | 0.0 | 0.0 | 0.0 | 0.0 | 0.0 | 0.0 | 0.0 | 0.0 | 0.0 | 0.0 | 0.0 |

Excluded Genes

|               |     |     |     |     |     |     |     |     |     |     |     |     |
|---------------|-----|-----|-----|-----|-----|-----|-----|-----|-----|-----|-----|-----|
| 7630403G23Rik | 0.0 | 0.0 | 0.0 | 0.0 | 0.0 | 0.0 | 0.0 | 0.0 | 0.0 | 0.0 | 0.0 | 0.0 |
| 8030411F24Rik | 0.0 | 0.0 | 0.0 | 0.0 | 0.0 | 0.0 | 0.0 | 0.0 | 0.0 | 0.0 | 0.0 | 0.0 |
| 8030423J24Rik | 0.0 | 0.0 | 0.0 | 0.0 | 0.0 | 0.0 | 0.0 | 0.0 | 0.0 | 0.0 | 0.0 | 0.0 |
| 8030443G20Rik | 0.0 | 0.0 | 0.0 | 0.0 | 0.0 | 0.0 | 0.0 | 0.0 | 0.0 | 0.0 | 0.0 | 0.0 |
| 8430422H06Rik | 0.0 | 0.0 | 0.0 | 0.0 | 0.0 | 0.0 | 0.0 | 0.0 | 0.0 | 0.0 | 0.0 | 0.0 |
| 9130209A04Rik | 0.0 | 0.0 | 0.0 | 0.0 | 0.0 | 0.0 | 0.0 | 0.0 | 0.0 | 0.0 | 0.0 | 0.0 |
| 9130227L01Rik | 0.0 | 0.0 | 0.0 | 0.0 | 0.0 | 0.0 | 0.0 | 0.0 | 0.0 | 0.0 | 0.0 | 0.0 |
| 9230009I02Rik | 0.0 | 0.0 | 0.0 | 0.0 | 0.0 | 0.0 | 0.0 | 0.0 | 0.0 | 0.0 | 0.0 | 0.0 |
| 9230102K24Rik | 0.0 | 0.0 | 0.0 | 0.0 | 0.0 | 0.0 | 0.0 | 0.0 | 0.0 | 0.0 | 0.0 | 0.0 |
| 9230102O04Rik | 0.0 | 0.0 | 0.0 | 0.0 | 0.0 | 0.0 | 0.0 | 0.0 | 0.0 | 0.0 | 0.0 | 0.0 |
| 9230104L09Rik | 0.0 | 0.0 | 0.0 | 0.0 | 0.0 | 0.0 | 0.0 | 0.0 | 0.0 | 0.0 | 0.0 | 0.0 |
| 9230110F15Rik | 0.0 | 0.0 | 0.0 | 0.0 | 0.0 | 0.0 | 0.0 | 0.0 | 0.0 | 0.0 | 0.0 | 0.0 |
| 9330162B11Rik | 0.0 | 0.0 | 0.0 | 0.0 | 0.0 | 0.0 | 0.0 | 0.0 | 0.0 | 0.0 | 0.0 | 0.0 |
| 9330182O14Rik | 0.0 | 0.0 | 0.0 | 0.0 | 0.0 | 0.0 | 0.0 | 0.0 | 0.0 | 0.0 | 0.0 | 0.0 |
| 9430007A20Rik | 0.0 | 0.0 | 0.0 | 0.0 | 0.0 | 0.0 | 0.0 | 0.0 | 0.0 | 0.0 | 0.0 | 0.0 |
| 9430014N10Rik | 0.0 | 0.0 | 0.0 | 0.0 | 0.0 | 0.0 | 0.0 | 0.0 | 0.0 | 0.0 | 0.0 | 0.0 |
| 9530002B09Rik | 0.0 | 0.0 | 0.0 | 0.0 | 0.0 | 0.0 | 0.0 | 0.0 | 0.0 | 0.0 | 0.0 | 0.0 |
| 9630013A20Rik | 0.0 | 0.0 | 0.0 | 0.0 | 0.0 | 0.0 | 0.0 | 0.0 | 0.0 | 0.0 | 0.0 | 0.0 |
| A1bg          | 0.0 | 0.0 | 0.0 | 0.0 | 0.0 | 0.0 | 0.0 | 0.0 | 0.0 | 0.0 | 0.0 | 0.0 |
| A330070K13Rik | 0.0 | 0.0 | 0.0 | 0.0 | 0.0 | 0.0 | 0.0 | 0.0 | 0.0 | 0.0 | 0.0 | 0.0 |
| A530006G24Rik | 0.0 | 0.0 | 0.0 | 0.0 | 0.0 | 0.0 | 0.0 | 0.0 | 0.0 | 0.0 | 0.0 | 0.0 |
| A530050N04Rik | 0.0 | 0.0 | 0.0 | 0.0 | 0.0 | 0.0 | 0.0 | 0.0 | 0.0 | 0.0 | 0.0 | 0.0 |
| A530053G22Rik | 0.0 | 0.0 | 0.0 | 0.0 | 0.0 | 0.0 | 0.0 | 0.0 | 0.0 | 0.0 | 0.0 | 0.0 |
| A530058N18Rik | 0.0 | 0.0 | 0.0 | 0.0 | 0.0 | 0.0 | 0.0 | 0.0 | 0.0 | 0.0 | 0.0 | 0.0 |
| A530099J19Rik | 0.0 | 0.0 | 0.0 | 0.0 | 0.0 | 0.0 | 0.0 | 0.0 | 0.0 | 0.0 | 0.0 | 0.0 |
| A630076J17Rik | 0.0 | 0.0 | 0.0 | 0.0 | 0.0 | 0.0 | 0.0 | 0.0 | 0.0 | 0.0 | 0.0 | 0.0 |
| A630095E13Rik | 0.0 | 0.0 | 0.0 | 0.0 | 0.0 | 0.0 | 0.0 | 0.0 | 0.0 | 0.0 | 0.0 | 0.0 |
| A730043L09Rik | 0.0 | 0.0 | 0.0 | 0.0 | 0.0 | 0.0 | 0.0 | 0.0 | 0.0 | 0.0 | 0.0 | 0.0 |
| A830019L24Rik | 0.0 | 0.0 | 0.0 | 0.0 | 0.0 | 0.0 | 0.0 | 0.0 | 0.0 | 0.0 | 0.0 | 0.0 |
| A930006I01Rik | 0.0 | 0.0 | 0.0 | 0.0 | 0.0 | 0.0 | 0.0 | 0.0 | 0.0 | 0.0 | 0.0 | 0.0 |
| A930009A15Rik | 0.0 | 0.0 | 0.0 | 0.0 | 0.0 | 0.0 | 0.0 | 0.0 | 0.0 | 0.0 | 0.0 | 0.0 |
| AA545190      | 0.0 | 0.0 | 0.0 | 0.0 | 0.0 | 0.0 | 0.0 | 0.0 | 0.0 | 0.0 | 0.0 | 0.0 |
| AA619741      | 0.0 | 0.0 | 0.0 | 0.0 | 0.0 | 0.0 | 0.0 | 0.0 | 0.0 | 0.0 | 0.0 | 0.0 |
| Aadacl3       | 0.0 | 0.0 | 0.0 | 0.0 | 0.0 | 0.0 | 0.0 | 0.0 | 0.0 | 0.0 | 0.0 | 0.0 |
| Abcb5         | 0.0 | 0.0 | 0.0 | 0.0 | 0.0 | 0.0 | 0.0 | 0.0 | 0.0 | 0.0 | 0.0 | 0.0 |
| Abo           | 0.0 | 0.0 | 0.0 | 0.0 | 0.0 | 0.0 | 0.0 | 0.0 | 0.0 | 0.0 | 0.0 | 0.0 |
| Acnat2        | 0.0 | 0.0 | 0.0 | 0.0 | 0.0 | 0.0 | 0.0 | 0.0 | 0.0 | 0.0 | 0.0 | 0.0 |
| Actrt1        | 0.0 | 0.0 | 0.0 | 0.0 | 0.0 | 0.0 | 0.0 | 0.0 | 0.0 | 0.0 | 0.0 | 0.0 |
| Actrt2        | 0.0 | 0.0 | 0.0 | 0.0 | 0.0 | 0.0 | 0.0 | 0.0 | 0.0 | 0.0 | 0.0 | 0.0 |
| Actrt3        | 0.0 | 0.0 | 0.0 | 0.0 | 0.0 | 0.0 | 0.0 | 0.0 | 0.0 | 0.0 | 0.0 | 0.0 |
| Adam29        | 0.0 | 0.0 | 0.0 | 0.0 | 0.0 | 0.0 | 0.0 | 0.0 | 0.0 | 0.0 | 0.0 | 0.0 |
| Adam34        | 0.0 | 0.0 | 0.0 | 0.0 | 0.0 | 0.0 | 0.0 | 0.0 | 0.0 | 0.0 | 0.0 | 0.0 |
| Adh4          | 0.0 | 0.0 | 0.0 | 0.0 | 0.0 | 0.0 | 0.0 | 0.0 | 0.0 | 0.0 | 0.0 | 0.0 |
| Adh6a         | 0.0 | 0.0 | 0.0 | 0.0 | 0.0 | 0.0 | 0.0 | 0.0 | 0.0 | 0.0 | 0.0 | 0.0 |
| AF067061      | 0.0 | 0.0 | 0.0 | 0.0 | 0.0 | 0.0 | 0.0 | 0.0 | 0.0 | 0.0 | 0.0 | 0.0 |
| AF067063      | 0.0 | 0.0 | 0.0 | 0.0 | 0.0 | 0.0 | 0.0 | 0.0 | 0.0 | 0.0 | 0.0 | 0.0 |
| AF357355      | 0.0 | 0.0 | 0.0 | 0.0 | 0.0 | 0.0 | 0.0 | 0.0 | 0.0 | 0.0 | 0.0 | 0.0 |
| AF357359      | 0.0 | 0.0 | 0.0 | 0.0 | 0.0 | 0.0 | 0.0 | 0.0 | 0.0 | 0.0 | 0.0 | 0.0 |
| AF357399      | 0.0 | 0.0 | 0.0 | 0.0 | 0.0 | 0.0 | 0.0 | 0.0 | 0.0 | 0.0 | 0.0 | 0.0 |
| AF357426      | 0.0 | 0.0 | 0.0 | 0.0 | 0.0 | 0.0 | 0.0 | 0.0 | 0.0 | 0.0 | 0.0 | 0.0 |
| Afm           | 0.0 | 0.0 | 0.0 | 0.0 | 0.0 | 0.0 | 0.0 | 0.0 | 0.0 | 0.0 | 0.0 | 0.0 |
| Agr2          | 0.0 | 0.0 | 0.0 | 0.0 | 0.0 | 0.0 | 0.0 | 0.0 | 0.0 | 0.0 | 0.0 | 0.0 |
| Agr3          | 0.0 | 0.0 | 0.0 | 0.0 | 0.0 | 0.0 | 0.0 | 0.0 | 0.0 | 0.0 | 0.0 | 0.0 |
| Agxt2         | 0.0 | 0.0 | 0.0 | 0.0 | 0.0 | 0.0 | 0.0 | 0.0 | 0.0 | 0.0 | 0.0 | 0.0 |
| Al646519      | 0.0 | 0.0 | 0.0 | 0.0 | 0.0 | 0.0 | 0.0 | 0.0 | 0.0 | 0.0 | 0.0 | 0.0 |
| Akap4         | 0.0 | 0.0 | 0.0 | 0.0 | 0.0 | 0.0 | 0.0 | 0.0 | 0.0 | 0.0 | 0.0 | 0.0 |
| Akr1c6        | 0.0 | 0.0 | 0.0 | 0.0 | 0.0 | 0.0 | 0.0 | 0.0 | 0.0 | 0.0 | 0.0 | 0.0 |

Excluded Genes

|               |     |     |     |     |     |     |     |     |     |     |     |     |
|---------------|-----|-----|-----|-----|-----|-----|-----|-----|-----|-----|-----|-----|
| Allc          | 0.0 | 0.0 | 0.0 | 0.0 | 0.0 | 0.0 | 0.0 | 0.0 | 0.0 | 0.0 | 0.0 | 0.0 |
| Alox12e       | 0.0 | 0.0 | 0.0 | 0.0 | 0.0 | 0.0 | 0.0 | 0.0 | 0.0 | 0.0 | 0.0 | 0.0 |
| Ambn          | 0.0 | 0.0 | 0.0 | 0.0 | 0.0 | 0.0 | 0.0 | 0.0 | 0.0 | 0.0 | 0.0 | 0.0 |
| Amtn          | 0.0 | 0.0 | 0.0 | 0.0 | 0.0 | 0.0 | 0.0 | 0.0 | 0.0 | 0.0 | 0.0 | 0.0 |
| Amy2b         | 0.0 | 0.0 | 0.0 | 0.0 | 0.0 | 0.0 | 0.0 | 0.0 | 0.0 | 0.0 | 0.0 | 0.0 |
| Ang6          | 0.0 | 0.0 | 0.0 | 0.0 | 0.0 | 0.0 | 0.0 | 0.0 | 0.0 | 0.0 | 0.0 | 0.0 |
| Ankrd60       | 0.0 | 0.0 | 0.0 | 0.0 | 0.0 | 0.0 | 0.0 | 0.0 | 0.0 | 0.0 | 0.0 | 0.0 |
| Apoa4         | 0.0 | 0.0 | 0.0 | 0.0 | 0.0 | 0.0 | 0.0 | 0.0 | 0.0 | 0.0 | 0.0 | 0.0 |
| Apoc3         | 0.0 | 0.0 | 0.0 | 0.0 | 0.0 | 0.0 | 0.0 | 0.0 | 0.0 | 0.0 | 0.0 | 0.0 |
| Apoc4         | 0.0 | 0.0 | 0.0 | 0.0 | 0.0 | 0.0 | 0.0 | 0.0 | 0.0 | 0.0 | 0.0 | 0.0 |
| Aqp6          | 0.0 | 0.0 | 0.0 | 0.0 | 0.0 | 0.0 | 0.0 | 0.0 | 0.0 | 0.0 | 0.0 | 0.0 |
| Arhgef38      | 0.0 | 0.0 | 0.0 | 0.0 | 0.0 | 0.0 | 0.0 | 0.0 | 0.0 | 0.0 | 0.0 | 0.0 |
| Arl14         | 0.0 | 0.0 | 0.0 | 0.0 | 0.0 | 0.0 | 0.0 | 0.0 | 0.0 | 0.0 | 0.0 | 0.0 |
| Armc12        | 0.0 | 0.0 | 0.0 | 0.0 | 0.0 | 0.0 | 0.0 | 0.0 | 0.0 | 0.0 | 0.0 | 0.0 |
| Arr3          | 0.0 | 0.0 | 0.0 | 0.0 | 0.0 | 0.0 | 0.0 | 0.0 | 0.0 | 0.0 | 0.0 | 0.0 |
| Asb18         | 0.0 | 0.0 | 0.0 | 0.0 | 0.0 | 0.0 | 0.0 | 0.0 | 0.0 | 0.0 | 0.0 | 0.0 |
| Ascl4         | 0.0 | 0.0 | 0.0 | 0.0 | 0.0 | 0.0 | 0.0 | 0.0 | 0.0 | 0.0 | 0.0 | 0.0 |
| Astl          | 0.0 | 0.0 | 0.0 | 0.0 | 0.0 | 0.0 | 0.0 | 0.0 | 0.0 | 0.0 | 0.0 | 0.0 |
| Atoh7         | 0.0 | 0.0 | 0.0 | 0.0 | 0.0 | 0.0 | 0.0 | 0.0 | 0.0 | 0.0 | 0.0 | 0.0 |
| Atp6ap1l      | 0.0 | 0.0 | 0.0 | 0.0 | 0.0 | 0.0 | 0.0 | 0.0 | 0.0 | 0.0 | 0.0 | 0.0 |
| Atp6v1g3      | 0.0 | 0.0 | 0.0 | 0.0 | 0.0 | 0.0 | 0.0 | 0.0 | 0.0 | 0.0 | 0.0 | 0.0 |
| AU016765      | 0.0 | 0.0 | 0.0 | 0.0 | 0.0 | 0.0 | 0.0 | 0.0 | 0.0 | 0.0 | 0.0 | 0.0 |
| AU022754      | 0.0 | 0.0 | 0.0 | 0.0 | 0.0 | 0.0 | 0.0 | 0.0 | 0.0 | 0.0 | 0.0 | 0.0 |
| Avp           | 0.0 | 0.0 | 0.0 | 0.0 | 0.0 | 0.0 | 0.0 | 0.0 | 0.0 | 0.0 | 0.0 | 0.0 |
| AW495222      | 0.0 | 0.0 | 0.0 | 0.0 | 0.0 | 0.0 | 0.0 | 0.0 | 0.0 | 0.0 | 0.0 | 0.0 |
| Awat1         | 0.0 | 0.0 | 0.0 | 0.0 | 0.0 | 0.0 | 0.0 | 0.0 | 0.0 | 0.0 | 0.0 | 0.0 |
| AY512915      | 0.0 | 0.0 | 0.0 | 0.0 | 0.0 | 0.0 | 0.0 | 0.0 | 0.0 | 0.0 | 0.0 | 0.0 |
| AY761184      | 0.0 | 0.0 | 0.0 | 0.0 | 0.0 | 0.0 | 0.0 | 0.0 | 0.0 | 0.0 | 0.0 | 0.0 |
| AY761185      | 0.0 | 0.0 | 0.0 | 0.0 | 0.0 | 0.0 | 0.0 | 0.0 | 0.0 | 0.0 | 0.0 | 0.0 |
| Aym1          | 0.0 | 0.0 | 0.0 | 0.0 | 0.0 | 0.0 | 0.0 | 0.0 | 0.0 | 0.0 | 0.0 | 0.0 |
| B020018J22Rik | 0.0 | 0.0 | 0.0 | 0.0 | 0.0 | 0.0 | 0.0 | 0.0 | 0.0 | 0.0 | 0.0 | 0.0 |
| B020031M17Rik | 0.0 | 0.0 | 0.0 | 0.0 | 0.0 | 0.0 | 0.0 | 0.0 | 0.0 | 0.0 | 0.0 | 0.0 |
| B230209K01Rik | 0.0 | 0.0 | 0.0 | 0.0 | 0.0 | 0.0 | 0.0 | 0.0 | 0.0 | 0.0 | 0.0 | 0.0 |
| B230214G05Rik | 0.0 | 0.0 | 0.0 | 0.0 | 0.0 | 0.0 | 0.0 | 0.0 | 0.0 | 0.0 | 0.0 | 0.0 |
| B3gat1        | 0.0 | 0.0 | 0.0 | 0.0 | 0.0 | 0.0 | 0.0 | 0.0 | 0.0 | 0.0 | 0.0 | 0.0 |
| B930025P03Rik | 0.0 | 0.0 | 0.0 | 0.0 | 0.0 | 0.0 | 0.0 | 0.0 | 0.0 | 0.0 | 0.0 | 0.0 |
| Banf2         | 0.0 | 0.0 | 0.0 | 0.0 | 0.0 | 0.0 | 0.0 | 0.0 | 0.0 | 0.0 | 0.0 | 0.0 |
| BB031773      | 0.0 | 0.0 | 0.0 | 0.0 | 0.0 | 0.0 | 0.0 | 0.0 | 0.0 | 0.0 | 0.0 | 0.0 |
| BC024386      | 0.0 | 0.0 | 0.0 | 0.0 | 0.0 | 0.0 | 0.0 | 0.0 | 0.0 | 0.0 | 0.0 | 0.0 |
| BC030500      | 0.0 | 0.0 | 0.0 | 0.0 | 0.0 | 0.0 | 0.0 | 0.0 | 0.0 | 0.0 | 0.0 | 0.0 |
| BC048546      | 0.0 | 0.0 | 0.0 | 0.0 | 0.0 | 0.0 | 0.0 | 0.0 | 0.0 | 0.0 | 0.0 | 0.0 |
| BC048562      | 0.0 | 0.0 | 0.0 | 0.0 | 0.0 | 0.0 | 0.0 | 0.0 | 0.0 | 0.0 | 0.0 | 0.0 |
| BC048602      | 0.0 | 0.0 | 0.0 | 0.0 | 0.0 | 0.0 | 0.0 | 0.0 | 0.0 | 0.0 | 0.0 | 0.0 |
| BC048671      | 0.0 | 0.0 | 0.0 | 0.0 | 0.0 | 0.0 | 0.0 | 0.0 | 0.0 | 0.0 | 0.0 | 0.0 |
| BC048943      | 0.0 | 0.0 | 0.0 | 0.0 | 0.0 | 0.0 | 0.0 | 0.0 | 0.0 | 0.0 | 0.0 | 0.0 |
| BC049730      | 0.0 | 0.0 | 0.0 | 0.0 | 0.0 | 0.0 | 0.0 | 0.0 | 0.0 | 0.0 | 0.0 | 0.0 |
| BC051070      | 0.0 | 0.0 | 0.0 | 0.0 | 0.0 | 0.0 | 0.0 | 0.0 | 0.0 | 0.0 | 0.0 | 0.0 |
| BC051537      | 0.0 | 0.0 | 0.0 | 0.0 | 0.0 | 0.0 | 0.0 | 0.0 | 0.0 | 0.0 | 0.0 | 0.0 |
| BC051665      | 0.0 | 0.0 | 0.0 | 0.0 | 0.0 | 0.0 | 0.0 | 0.0 | 0.0 | 0.0 | 0.0 | 0.0 |
| BC053393      | 0.0 | 0.0 | 0.0 | 0.0 | 0.0 | 0.0 | 0.0 | 0.0 | 0.0 | 0.0 | 0.0 | 0.0 |
| BC055402      | 0.0 | 0.0 | 0.0 | 0.0 | 0.0 | 0.0 | 0.0 | 0.0 | 0.0 | 0.0 | 0.0 | 0.0 |
| BC061237      | 0.0 | 0.0 | 0.0 | 0.0 | 0.0 | 0.0 | 0.0 | 0.0 | 0.0 | 0.0 | 0.0 | 0.0 |
| BC100530      | 0.0 | 0.0 | 0.0 | 0.0 | 0.0 | 0.0 | 0.0 | 0.0 | 0.0 | 0.0 | 0.0 | 0.0 |
| BC117090      | 0.0 | 0.0 | 0.0 | 0.0 | 0.0 | 0.0 | 0.0 | 0.0 | 0.0 | 0.0 | 0.0 | 0.0 |
| Beta-s        | 0.0 | 0.0 | 0.0 | 0.0 | 0.0 | 0.0 | 0.0 | 0.0 | 0.0 | 0.0 | 0.0 | 0.0 |
| Bex6          | 0.0 | 0.0 | 0.0 | 0.0 | 0.0 | 0.0 | 0.0 | 0.0 | 0.0 | 0.0 | 0.0 | 0.0 |
| Bhlha9        | 0.0 | 0.0 | 0.0 | 0.0 | 0.0 | 0.0 | 0.0 | 0.0 | 0.0 | 0.0 | 0.0 | 0.0 |

Excluded Genes

|               |     |     |     |     |     |     |     |     |     |     |     |     |
|---------------|-----|-----|-----|-----|-----|-----|-----|-----|-----|-----|-----|-----|
| Bhlhe23       | 0.0 | 0.0 | 0.0 | 0.0 | 0.0 | 0.0 | 0.0 | 0.0 | 0.0 | 0.0 | 0.0 | 0.0 |
| Bhmt2         | 0.0 | 0.0 | 0.0 | 0.0 | 0.0 | 0.0 | 0.0 | 0.0 | 0.0 | 0.0 | 0.0 | 0.0 |
| Bmp10         | 0.0 | 0.0 | 0.0 | 0.0 | 0.0 | 0.0 | 0.0 | 0.0 | 0.0 | 0.0 | 0.0 | 0.0 |
| Bpi           | 0.0 | 0.0 | 0.0 | 0.0 | 0.0 | 0.0 | 0.0 | 0.0 | 0.0 | 0.0 | 0.0 | 0.0 |
| Bpifa1        | 0.0 | 0.0 | 0.0 | 0.0 | 0.0 | 0.0 | 0.0 | 0.0 | 0.0 | 0.0 | 0.0 | 0.0 |
| Bpifa2        | 0.0 | 0.0 | 0.0 | 0.0 | 0.0 | 0.0 | 0.0 | 0.0 | 0.0 | 0.0 | 0.0 | 0.0 |
| Bpifa3        | 0.0 | 0.0 | 0.0 | 0.0 | 0.0 | 0.0 | 0.0 | 0.0 | 0.0 | 0.0 | 0.0 | 0.0 |
| Bpifa5        | 0.0 | 0.0 | 0.0 | 0.0 | 0.0 | 0.0 | 0.0 | 0.0 | 0.0 | 0.0 | 0.0 | 0.0 |
| Bpifb3        | 0.0 | 0.0 | 0.0 | 0.0 | 0.0 | 0.0 | 0.0 | 0.0 | 0.0 | 0.0 | 0.0 | 0.0 |
| Bsnd          | 0.0 | 0.0 | 0.0 | 0.0 | 0.0 | 0.0 | 0.0 | 0.0 | 0.0 | 0.0 | 0.0 | 0.0 |
| Bsph1         | 0.0 | 0.0 | 0.0 | 0.0 | 0.0 | 0.0 | 0.0 | 0.0 | 0.0 | 0.0 | 0.0 | 0.0 |
| Bsph2         | 0.0 | 0.0 | 0.0 | 0.0 | 0.0 | 0.0 | 0.0 | 0.0 | 0.0 | 0.0 | 0.0 | 0.0 |
| Btnl2         | 0.0 | 0.0 | 0.0 | 0.0 | 0.0 | 0.0 | 0.0 | 0.0 | 0.0 | 0.0 | 0.0 | 0.0 |
| Btnl4         | 0.0 | 0.0 | 0.0 | 0.0 | 0.0 | 0.0 | 0.0 | 0.0 | 0.0 | 0.0 | 0.0 | 0.0 |
| Btnl6         | 0.0 | 0.0 | 0.0 | 0.0 | 0.0 | 0.0 | 0.0 | 0.0 | 0.0 | 0.0 | 0.0 | 0.0 |
| C030007H22Rik | 0.0 | 0.0 | 0.0 | 0.0 | 0.0 | 0.0 | 0.0 | 0.0 | 0.0 | 0.0 | 0.0 | 0.0 |
| C030013G03Rik | 0.0 | 0.0 | 0.0 | 0.0 | 0.0 | 0.0 | 0.0 | 0.0 | 0.0 | 0.0 | 0.0 | 0.0 |
| C030023E24Rik | 0.0 | 0.0 | 0.0 | 0.0 | 0.0 | 0.0 | 0.0 | 0.0 | 0.0 | 0.0 | 0.0 | 0.0 |
| C1ql2         | 0.0 | 0.0 | 0.0 | 0.0 | 0.0 | 0.0 | 0.0 | 0.0 | 0.0 | 0.0 | 0.0 | 0.0 |
| C2cd4b        | 0.0 | 0.0 | 0.0 | 0.0 | 0.0 | 0.0 | 0.0 | 0.0 | 0.0 | 0.0 | 0.0 | 0.0 |
| C330008G21Rik | 0.0 | 0.0 | 0.0 | 0.0 | 0.0 | 0.0 | 0.0 | 0.0 | 0.0 | 0.0 | 0.0 | 0.0 |
| C86695        | 0.0 | 0.0 | 0.0 | 0.0 | 0.0 | 0.0 | 0.0 | 0.0 | 0.0 | 0.0 | 0.0 | 0.0 |
| C87499        | 0.0 | 0.0 | 0.0 | 0.0 | 0.0 | 0.0 | 0.0 | 0.0 | 0.0 | 0.0 | 0.0 | 0.0 |
| C8b           | 0.0 | 0.0 | 0.0 | 0.0 | 0.0 | 0.0 | 0.0 | 0.0 | 0.0 | 0.0 | 0.0 | 0.0 |
| Cabp2         | 0.0 | 0.0 | 0.0 | 0.0 | 0.0 | 0.0 | 0.0 | 0.0 | 0.0 | 0.0 | 0.0 | 0.0 |
| Cabp7         | 0.0 | 0.0 | 0.0 | 0.0 | 0.0 | 0.0 | 0.0 | 0.0 | 0.0 | 0.0 | 0.0 | 0.0 |
| Cabs1         | 0.0 | 0.0 | 0.0 | 0.0 | 0.0 | 0.0 | 0.0 | 0.0 | 0.0 | 0.0 | 0.0 | 0.0 |
| Calm4         | 0.0 | 0.0 | 0.0 | 0.0 | 0.0 | 0.0 | 0.0 | 0.0 | 0.0 | 0.0 | 0.0 | 0.0 |
| Calm5         | 0.0 | 0.0 | 0.0 | 0.0 | 0.0 | 0.0 | 0.0 | 0.0 | 0.0 | 0.0 | 0.0 | 0.0 |
| Capza3        | 0.0 | 0.0 | 0.0 | 0.0 | 0.0 | 0.0 | 0.0 | 0.0 | 0.0 | 0.0 | 0.0 | 0.0 |
| Cartpt        | 0.0 | 0.0 | 0.0 | 0.0 | 0.0 | 0.0 | 0.0 | 0.0 | 0.0 | 0.0 | 0.0 | 0.0 |
| Cbln1         | 0.0 | 0.0 | 0.0 | 0.0 | 0.0 | 0.0 | 0.0 | 0.0 | 0.0 | 0.0 | 0.0 | 0.0 |
| Cbln2         | 0.0 | 0.0 | 0.0 | 0.0 | 0.0 | 0.0 | 0.0 | 0.0 | 0.0 | 0.0 | 0.0 | 0.0 |
| Ccdc129       | 0.0 | 0.0 | 0.0 | 0.0 | 0.0 | 0.0 | 0.0 | 0.0 | 0.0 | 0.0 | 0.0 | 0.0 |
| Ccdc42        | 0.0 | 0.0 | 0.0 | 0.0 | 0.0 | 0.0 | 0.0 | 0.0 | 0.0 | 0.0 | 0.0 | 0.0 |
| Ccdc70        | 0.0 | 0.0 | 0.0 | 0.0 | 0.0 | 0.0 | 0.0 | 0.0 | 0.0 | 0.0 | 0.0 | 0.0 |
| Ccl1          | 0.0 | 0.0 | 0.0 | 0.0 | 0.0 | 0.0 | 0.0 | 0.0 | 0.0 | 0.0 | 0.0 | 0.0 |
| Ccl26         | 0.0 | 0.0 | 0.0 | 0.0 | 0.0 | 0.0 | 0.0 | 0.0 | 0.0 | 0.0 | 0.0 | 0.0 |
| Ccr8          | 0.0 | 0.0 | 0.0 | 0.0 | 0.0 | 0.0 | 0.0 | 0.0 | 0.0 | 0.0 | 0.0 | 0.0 |
| Cd163l1       | 0.0 | 0.0 | 0.0 | 0.0 | 0.0 | 0.0 | 0.0 | 0.0 | 0.0 | 0.0 | 0.0 | 0.0 |
| Cd209b        | 0.0 | 0.0 | 0.0 | 0.0 | 0.0 | 0.0 | 0.0 | 0.0 | 0.0 | 0.0 | 0.0 | 0.0 |
| Cd209e        | 0.0 | 0.0 | 0.0 | 0.0 | 0.0 | 0.0 | 0.0 | 0.0 | 0.0 | 0.0 | 0.0 | 0.0 |
| Cd209g        | 0.0 | 0.0 | 0.0 | 0.0 | 0.0 | 0.0 | 0.0 | 0.0 | 0.0 | 0.0 | 0.0 | 0.0 |
| Cd300c        | 0.0 | 0.0 | 0.0 | 0.0 | 0.0 | 0.0 | 0.0 | 0.0 | 0.0 | 0.0 | 0.0 | 0.0 |
| Cd3e          | 0.0 | 0.0 | 0.0 | 0.0 | 0.0 | 0.0 | 0.0 | 0.0 | 0.0 | 0.0 | 0.0 | 0.0 |
| Cdh7          | 0.0 | 0.0 | 0.0 | 0.0 | 0.0 | 0.0 | 0.0 | 0.0 | 0.0 | 0.0 | 0.0 | 0.0 |
| Cdx2          | 0.0 | 0.0 | 0.0 | 0.0 | 0.0 | 0.0 | 0.0 | 0.0 | 0.0 | 0.0 | 0.0 | 0.0 |
| Cdx4          | 0.0 | 0.0 | 0.0 | 0.0 | 0.0 | 0.0 | 0.0 | 0.0 | 0.0 | 0.0 | 0.0 | 0.0 |
| Ceacam11      | 0.0 | 0.0 | 0.0 | 0.0 | 0.0 | 0.0 | 0.0 | 0.0 | 0.0 | 0.0 | 0.0 | 0.0 |
| Ceacam12      | 0.0 | 0.0 | 0.0 | 0.0 | 0.0 | 0.0 | 0.0 | 0.0 | 0.0 | 0.0 | 0.0 | 0.0 |
| Ceacam14      | 0.0 | 0.0 | 0.0 | 0.0 | 0.0 | 0.0 | 0.0 | 0.0 | 0.0 | 0.0 | 0.0 | 0.0 |
| Ceacam3       | 0.0 | 0.0 | 0.0 | 0.0 | 0.0 | 0.0 | 0.0 | 0.0 | 0.0 | 0.0 | 0.0 | 0.0 |
| Ceacam5       | 0.0 | 0.0 | 0.0 | 0.0 | 0.0 | 0.0 | 0.0 | 0.0 | 0.0 | 0.0 | 0.0 | 0.0 |
| Ceacam-ps1    | 0.0 | 0.0 | 0.0 | 0.0 | 0.0 | 0.0 | 0.0 | 0.0 | 0.0 | 0.0 | 0.0 | 0.0 |
| Cela2a        | 0.0 | 0.0 | 0.0 | 0.0 | 0.0 | 0.0 | 0.0 | 0.0 | 0.0 | 0.0 | 0.0 | 0.0 |
| Cela3b        | 0.0 | 0.0 | 0.0 | 0.0 | 0.0 | 0.0 | 0.0 | 0.0 | 0.0 | 0.0 | 0.0 | 0.0 |
| Ces1e         | 0.0 | 0.0 | 0.0 | 0.0 | 0.0 | 0.0 | 0.0 | 0.0 | 0.0 | 0.0 | 0.0 | 0.0 |

Excluded Genes

|          |     |     |     |     |     |     |     |     |     |     |     |     |
|----------|-----|-----|-----|-----|-----|-----|-----|-----|-----|-----|-----|-----|
| Ces3a    | 0.0 | 0.0 | 0.0 | 0.0 | 0.0 | 0.0 | 0.0 | 0.0 | 0.0 | 0.0 | 0.0 | 0.0 |
| Cetn1    | 0.0 | 0.0 | 0.0 | 0.0 | 0.0 | 0.0 | 0.0 | 0.0 | 0.0 | 0.0 | 0.0 | 0.0 |
| Cfc1     | 0.0 | 0.0 | 0.0 | 0.0 | 0.0 | 0.0 | 0.0 | 0.0 | 0.0 | 0.0 | 0.0 | 0.0 |
| Chrm2    | 0.0 | 0.0 | 0.0 | 0.0 | 0.0 | 0.0 | 0.0 | 0.0 | 0.0 | 0.0 | 0.0 | 0.0 |
| Chrna5   | 0.0 | 0.0 | 0.0 | 0.0 | 0.0 | 0.0 | 0.0 | 0.0 | 0.0 | 0.0 | 0.0 | 0.0 |
| Chst4    | 0.0 | 0.0 | 0.0 | 0.0 | 0.0 | 0.0 | 0.0 | 0.0 | 0.0 | 0.0 | 0.0 | 0.0 |
| CK137956 | 0.0 | 0.0 | 0.0 | 0.0 | 0.0 | 0.0 | 0.0 | 0.0 | 0.0 | 0.0 | 0.0 | 0.0 |
| Ckmt2    | 0.0 | 0.0 | 0.0 | 0.0 | 0.0 | 0.0 | 0.0 | 0.0 | 0.0 | 0.0 | 0.0 | 0.0 |
| Cldn16   | 0.0 | 0.0 | 0.0 | 0.0 | 0.0 | 0.0 | 0.0 | 0.0 | 0.0 | 0.0 | 0.0 | 0.0 |
| Cldn17   | 0.0 | 0.0 | 0.0 | 0.0 | 0.0 | 0.0 | 0.0 | 0.0 | 0.0 | 0.0 | 0.0 | 0.0 |
| Cldn8    | 0.0 | 0.0 | 0.0 | 0.0 | 0.0 | 0.0 | 0.0 | 0.0 | 0.0 | 0.0 | 0.0 | 0.0 |
| Clec4b2  | 0.0 | 0.0 | 0.0 | 0.0 | 0.0 | 0.0 | 0.0 | 0.0 | 0.0 | 0.0 | 0.0 | 0.0 |
| Clec4g   | 0.0 | 0.0 | 0.0 | 0.0 | 0.0 | 0.0 | 0.0 | 0.0 | 0.0 | 0.0 | 0.0 | 0.0 |
| Clps     | 0.0 | 0.0 | 0.0 | 0.0 | 0.0 | 0.0 | 0.0 | 0.0 | 0.0 | 0.0 | 0.0 | 0.0 |
| Cpls2    | 0.0 | 0.0 | 0.0 | 0.0 | 0.0 | 0.0 | 0.0 | 0.0 | 0.0 | 0.0 | 0.0 | 0.0 |
| Clrn2    | 0.0 | 0.0 | 0.0 | 0.0 | 0.0 | 0.0 | 0.0 | 0.0 | 0.0 | 0.0 | 0.0 | 0.0 |
| Cmtm2b   | 0.0 | 0.0 | 0.0 | 0.0 | 0.0 | 0.0 | 0.0 | 0.0 | 0.0 | 0.0 | 0.0 | 0.0 |
| Cndp1    | 0.0 | 0.0 | 0.0 | 0.0 | 0.0 | 0.0 | 0.0 | 0.0 | 0.0 | 0.0 | 0.0 | 0.0 |
| Cox8c    | 0.0 | 0.0 | 0.0 | 0.0 | 0.0 | 0.0 | 0.0 | 0.0 | 0.0 | 0.0 | 0.0 | 0.0 |
| Cplx1    | 0.0 | 0.0 | 0.0 | 0.0 | 0.0 | 0.0 | 0.0 | 0.0 | 0.0 | 0.0 | 0.0 | 0.0 |
| Cpne6    | 0.0 | 0.0 | 0.0 | 0.0 | 0.0 | 0.0 | 0.0 | 0.0 | 0.0 | 0.0 | 0.0 | 0.0 |
| Cpxcr1   | 0.0 | 0.0 | 0.0 | 0.0 | 0.0 | 0.0 | 0.0 | 0.0 | 0.0 | 0.0 | 0.0 | 0.0 |
| Crh      | 0.0 | 0.0 | 0.0 | 0.0 | 0.0 | 0.0 | 0.0 | 0.0 | 0.0 | 0.0 | 0.0 | 0.0 |
| Crhr1    | 0.0 | 0.0 | 0.0 | 0.0 | 0.0 | 0.0 | 0.0 | 0.0 | 0.0 | 0.0 | 0.0 | 0.0 |
| Crisp3   | 0.0 | 0.0 | 0.0 | 0.0 | 0.0 | 0.0 | 0.0 | 0.0 | 0.0 | 0.0 | 0.0 | 0.0 |
| Cryba2   | 0.0 | 0.0 | 0.0 | 0.0 | 0.0 | 0.0 | 0.0 | 0.0 | 0.0 | 0.0 | 0.0 | 0.0 |
| Cryga    | 0.0 | 0.0 | 0.0 | 0.0 | 0.0 | 0.0 | 0.0 | 0.0 | 0.0 | 0.0 | 0.0 | 0.0 |
| Crygb    | 0.0 | 0.0 | 0.0 | 0.0 | 0.0 | 0.0 | 0.0 | 0.0 | 0.0 | 0.0 | 0.0 | 0.0 |
| Crygc    | 0.0 | 0.0 | 0.0 | 0.0 | 0.0 | 0.0 | 0.0 | 0.0 | 0.0 | 0.0 | 0.0 | 0.0 |
| Crygd    | 0.0 | 0.0 | 0.0 | 0.0 | 0.0 | 0.0 | 0.0 | 0.0 | 0.0 | 0.0 | 0.0 | 0.0 |
| Cryge    | 0.0 | 0.0 | 0.0 | 0.0 | 0.0 | 0.0 | 0.0 | 0.0 | 0.0 | 0.0 | 0.0 | 0.0 |
| Csn2     | 0.0 | 0.0 | 0.0 | 0.0 | 0.0 | 0.0 | 0.0 | 0.0 | 0.0 | 0.0 | 0.0 | 0.0 |
| Csprs    | 0.0 | 0.0 | 0.0 | 0.0 | 0.0 | 0.0 | 0.0 | 0.0 | 0.0 | 0.0 | 0.0 | 0.0 |
| Cst10    | 0.0 | 0.0 | 0.0 | 0.0 | 0.0 | 0.0 | 0.0 | 0.0 | 0.0 | 0.0 | 0.0 | 0.0 |
| Cst11    | 0.0 | 0.0 | 0.0 | 0.0 | 0.0 | 0.0 | 0.0 | 0.0 | 0.0 | 0.0 | 0.0 | 0.0 |
| Cst12    | 0.0 | 0.0 | 0.0 | 0.0 | 0.0 | 0.0 | 0.0 | 0.0 | 0.0 | 0.0 | 0.0 | 0.0 |
| Cts3     | 0.0 | 0.0 | 0.0 | 0.0 | 0.0 | 0.0 | 0.0 | 0.0 | 0.0 | 0.0 | 0.0 | 0.0 |
| Cts6     | 0.0 | 0.0 | 0.0 | 0.0 | 0.0 | 0.0 | 0.0 | 0.0 | 0.0 | 0.0 | 0.0 | 0.0 |
| Ctsg     | 0.0 | 0.0 | 0.0 | 0.0 | 0.0 | 0.0 | 0.0 | 0.0 | 0.0 | 0.0 | 0.0 | 0.0 |
| Ctsj     | 0.0 | 0.0 | 0.0 | 0.0 | 0.0 | 0.0 | 0.0 | 0.0 | 0.0 | 0.0 | 0.0 | 0.0 |
| Ctsm     | 0.0 | 0.0 | 0.0 | 0.0 | 0.0 | 0.0 | 0.0 | 0.0 | 0.0 | 0.0 | 0.0 | 0.0 |
| Ctsr     | 0.0 | 0.0 | 0.0 | 0.0 | 0.0 | 0.0 | 0.0 | 0.0 | 0.0 | 0.0 | 0.0 | 0.0 |
| Cxcl11   | 0.0 | 0.0 | 0.0 | 0.0 | 0.0 | 0.0 | 0.0 | 0.0 | 0.0 | 0.0 | 0.0 | 0.0 |
| Cylc1    | 0.0 | 0.0 | 0.0 | 0.0 | 0.0 | 0.0 | 0.0 | 0.0 | 0.0 | 0.0 | 0.0 | 0.0 |
| Cyp2a12  | 0.0 | 0.0 | 0.0 | 0.0 | 0.0 | 0.0 | 0.0 | 0.0 | 0.0 | 0.0 | 0.0 | 0.0 |
| Cyp2a22  | 0.0 | 0.0 | 0.0 | 0.0 | 0.0 | 0.0 | 0.0 | 0.0 | 0.0 | 0.0 | 0.0 | 0.0 |
| Cyp2a5   | 0.0 | 0.0 | 0.0 | 0.0 | 0.0 | 0.0 | 0.0 | 0.0 | 0.0 | 0.0 | 0.0 | 0.0 |
| Cyp2b19  | 0.0 | 0.0 | 0.0 | 0.0 | 0.0 | 0.0 | 0.0 | 0.0 | 0.0 | 0.0 | 0.0 | 0.0 |
| Cyp2b23  | 0.0 | 0.0 | 0.0 | 0.0 | 0.0 | 0.0 | 0.0 | 0.0 | 0.0 | 0.0 | 0.0 | 0.0 |
| Cyp2c37  | 0.0 | 0.0 | 0.0 | 0.0 | 0.0 | 0.0 | 0.0 | 0.0 | 0.0 | 0.0 | 0.0 | 0.0 |
| Cyp2c54  | 0.0 | 0.0 | 0.0 | 0.0 | 0.0 | 0.0 | 0.0 | 0.0 | 0.0 | 0.0 | 0.0 | 0.0 |
| Cyp2c70  | 0.0 | 0.0 | 0.0 | 0.0 | 0.0 | 0.0 | 0.0 | 0.0 | 0.0 | 0.0 | 0.0 | 0.0 |
| Cyp2d12  | 0.0 | 0.0 | 0.0 | 0.0 | 0.0 | 0.0 | 0.0 | 0.0 | 0.0 | 0.0 | 0.0 | 0.0 |
| Cyp2g1   | 0.0 | 0.0 | 0.0 | 0.0 | 0.0 | 0.0 | 0.0 | 0.0 | 0.0 | 0.0 | 0.0 | 0.0 |
| Cyp2w1   | 0.0 | 0.0 | 0.0 | 0.0 | 0.0 | 0.0 | 0.0 | 0.0 | 0.0 | 0.0 | 0.0 | 0.0 |
| Cyp3a11  | 0.0 | 0.0 | 0.0 | 0.0 | 0.0 | 0.0 | 0.0 | 0.0 | 0.0 | 0.0 | 0.0 | 0.0 |
| Cyp3a25  | 0.0 | 0.0 | 0.0 | 0.0 | 0.0 | 0.0 | 0.0 | 0.0 | 0.0 | 0.0 | 0.0 | 0.0 |

Excluded Genes



|               |     |     |     |     |     |     |     |     |     |     |     |     |
|---------------|-----|-----|-----|-----|-----|-----|-----|-----|-----|-----|-----|-----|
| Defb39        | 0.0 | 0.0 | 0.0 | 0.0 | 0.0 | 0.0 | 0.0 | 0.0 | 0.0 | 0.0 | 0.0 | 0.0 |
| Defb4         | 0.0 | 0.0 | 0.0 | 0.0 | 0.0 | 0.0 | 0.0 | 0.0 | 0.0 | 0.0 | 0.0 | 0.0 |
| Defb40        | 0.0 | 0.0 | 0.0 | 0.0 | 0.0 | 0.0 | 0.0 | 0.0 | 0.0 | 0.0 | 0.0 | 0.0 |
| Defb41        | 0.0 | 0.0 | 0.0 | 0.0 | 0.0 | 0.0 | 0.0 | 0.0 | 0.0 | 0.0 | 0.0 | 0.0 |
| Defb43        | 0.0 | 0.0 | 0.0 | 0.0 | 0.0 | 0.0 | 0.0 | 0.0 | 0.0 | 0.0 | 0.0 | 0.0 |
| Defb44-ps     | 0.0 | 0.0 | 0.0 | 0.0 | 0.0 | 0.0 | 0.0 | 0.0 | 0.0 | 0.0 | 0.0 | 0.0 |
| Defb45        | 0.0 | 0.0 | 0.0 | 0.0 | 0.0 | 0.0 | 0.0 | 0.0 | 0.0 | 0.0 | 0.0 | 0.0 |
| Defb46        | 0.0 | 0.0 | 0.0 | 0.0 | 0.0 | 0.0 | 0.0 | 0.0 | 0.0 | 0.0 | 0.0 | 0.0 |
| Defb47        | 0.0 | 0.0 | 0.0 | 0.0 | 0.0 | 0.0 | 0.0 | 0.0 | 0.0 | 0.0 | 0.0 | 0.0 |
| Defb5         | 0.0 | 0.0 | 0.0 | 0.0 | 0.0 | 0.0 | 0.0 | 0.0 | 0.0 | 0.0 | 0.0 | 0.0 |
| Defb50        | 0.0 | 0.0 | 0.0 | 0.0 | 0.0 | 0.0 | 0.0 | 0.0 | 0.0 | 0.0 | 0.0 | 0.0 |
| Defb6         | 0.0 | 0.0 | 0.0 | 0.0 | 0.0 | 0.0 | 0.0 | 0.0 | 0.0 | 0.0 | 0.0 | 0.0 |
| Defb8         | 0.0 | 0.0 | 0.0 | 0.0 | 0.0 | 0.0 | 0.0 | 0.0 | 0.0 | 0.0 | 0.0 | 0.0 |
| Defb9         | 0.0 | 0.0 | 0.0 | 0.0 | 0.0 | 0.0 | 0.0 | 0.0 | 0.0 | 0.0 | 0.0 | 0.0 |
| Dhrs7c        | 0.0 | 0.0 | 0.0 | 0.0 | 0.0 | 0.0 | 0.0 | 0.0 | 0.0 | 0.0 | 0.0 | 0.0 |
| Dhrsx         | 0.0 | 0.0 | 0.0 | 0.0 | 0.0 | 0.0 | 0.0 | 0.0 | 0.0 | 0.0 | 0.0 | 0.0 |
| Dlx6as2       | 0.0 | 0.0 | 0.0 | 0.0 | 0.0 | 0.0 | 0.0 | 0.0 | 0.0 | 0.0 | 0.0 | 0.0 |
| Dmrt3         | 0.0 | 0.0 | 0.0 | 0.0 | 0.0 | 0.0 | 0.0 | 0.0 | 0.0 | 0.0 | 0.0 | 0.0 |
| Dnajb8        | 0.0 | 0.0 | 0.0 | 0.0 | 0.0 | 0.0 | 0.0 | 0.0 | 0.0 | 0.0 | 0.0 | 0.0 |
| Dnajc5g       | 0.0 | 0.0 | 0.0 | 0.0 | 0.0 | 0.0 | 0.0 | 0.0 | 0.0 | 0.0 | 0.0 | 0.0 |
| Dnase2b       | 0.0 | 0.0 | 0.0 | 0.0 | 0.0 | 0.0 | 0.0 | 0.0 | 0.0 | 0.0 | 0.0 | 0.0 |
| DQ267100      | 0.0 | 0.0 | 0.0 | 0.0 | 0.0 | 0.0 | 0.0 | 0.0 | 0.0 | 0.0 | 0.0 | 0.0 |
| DQ267101      | 0.0 | 0.0 | 0.0 | 0.0 | 0.0 | 0.0 | 0.0 | 0.0 | 0.0 | 0.0 | 0.0 | 0.0 |
| Dsg4          | 0.0 | 0.0 | 0.0 | 0.0 | 0.0 | 0.0 | 0.0 | 0.0 | 0.0 | 0.0 | 0.0 | 0.0 |
| Duoxa2        | 0.0 | 0.0 | 0.0 | 0.0 | 0.0 | 0.0 | 0.0 | 0.0 | 0.0 | 0.0 | 0.0 | 0.0 |
| Dusp21        | 0.0 | 0.0 | 0.0 | 0.0 | 0.0 | 0.0 | 0.0 | 0.0 | 0.0 | 0.0 | 0.0 | 0.0 |
| Dynap         | 0.0 | 0.0 | 0.0 | 0.0 | 0.0 | 0.0 | 0.0 | 0.0 | 0.0 | 0.0 | 0.0 | 0.0 |
| Dytn          | 0.0 | 0.0 | 0.0 | 0.0 | 0.0 | 0.0 | 0.0 | 0.0 | 0.0 | 0.0 | 0.0 | 0.0 |
| E030002O03Rik | 0.0 | 0.0 | 0.0 | 0.0 | 0.0 | 0.0 | 0.0 | 0.0 | 0.0 | 0.0 | 0.0 | 0.0 |
| E030019B06Rik | 0.0 | 0.0 | 0.0 | 0.0 | 0.0 | 0.0 | 0.0 | 0.0 | 0.0 | 0.0 | 0.0 | 0.0 |
| E030019B13Rik | 0.0 | 0.0 | 0.0 | 0.0 | 0.0 | 0.0 | 0.0 | 0.0 | 0.0 | 0.0 | 0.0 | 0.0 |
| E330012B07Rik | 0.0 | 0.0 | 0.0 | 0.0 | 0.0 | 0.0 | 0.0 | 0.0 | 0.0 | 0.0 | 0.0 | 0.0 |
| E330017A01Rik | 0.0 | 0.0 | 0.0 | 0.0 | 0.0 | 0.0 | 0.0 | 0.0 | 0.0 | 0.0 | 0.0 | 0.0 |
| E330017L17Rik | 0.0 | 0.0 | 0.0 | 0.0 | 0.0 | 0.0 | 0.0 | 0.0 | 0.0 | 0.0 | 0.0 | 0.0 |
| Ear1          | 0.0 | 0.0 | 0.0 | 0.0 | 0.0 | 0.0 | 0.0 | 0.0 | 0.0 | 0.0 | 0.0 | 0.0 |
| Ear11         | 0.0 | 0.0 | 0.0 | 0.0 | 0.0 | 0.0 | 0.0 | 0.0 | 0.0 | 0.0 | 0.0 | 0.0 |
| Ear14         | 0.0 | 0.0 | 0.0 | 0.0 | 0.0 | 0.0 | 0.0 | 0.0 | 0.0 | 0.0 | 0.0 | 0.0 |
| Ear4          | 0.0 | 0.0 | 0.0 | 0.0 | 0.0 | 0.0 | 0.0 | 0.0 | 0.0 | 0.0 | 0.0 | 0.0 |
| Ear6          | 0.0 | 0.0 | 0.0 | 0.0 | 0.0 | 0.0 | 0.0 | 0.0 | 0.0 | 0.0 | 0.0 | 0.0 |
| Ear7          | 0.0 | 0.0 | 0.0 | 0.0 | 0.0 | 0.0 | 0.0 | 0.0 | 0.0 | 0.0 | 0.0 | 0.0 |
| Egfbp2        | 0.0 | 0.0 | 0.0 | 0.0 | 0.0 | 0.0 | 0.0 | 0.0 | 0.0 | 0.0 | 0.0 | 0.0 |
| Elane         | 0.0 | 0.0 | 0.0 | 0.0 | 0.0 | 0.0 | 0.0 | 0.0 | 0.0 | 0.0 | 0.0 | 0.0 |
| Enpp7         | 0.0 | 0.0 | 0.0 | 0.0 | 0.0 | 0.0 | 0.0 | 0.0 | 0.0 | 0.0 | 0.0 | 0.0 |
| Eppin         | 0.0 | 0.0 | 0.0 | 0.0 | 0.0 | 0.0 | 0.0 | 0.0 | 0.0 | 0.0 | 0.0 | 0.0 |
| Eras          | 0.0 | 0.0 | 0.0 | 0.0 | 0.0 | 0.0 | 0.0 | 0.0 | 0.0 | 0.0 | 0.0 | 0.0 |
| Ernm          | 0.0 | 0.0 | 0.0 | 0.0 | 0.0 | 0.0 | 0.0 | 0.0 | 0.0 | 0.0 | 0.0 | 0.0 |
| Etv2          | 0.0 | 0.0 | 0.0 | 0.0 | 0.0 | 0.0 | 0.0 | 0.0 | 0.0 | 0.0 | 0.0 | 0.0 |
| Evx1          | 0.0 | 0.0 | 0.0 | 0.0 | 0.0 | 0.0 | 0.0 | 0.0 | 0.0 | 0.0 | 0.0 | 0.0 |
| F830002L21Rik | 0.0 | 0.0 | 0.0 | 0.0 | 0.0 | 0.0 | 0.0 | 0.0 | 0.0 | 0.0 | 0.0 | 0.0 |
| Fabp6         | 0.0 | 0.0 | 0.0 | 0.0 | 0.0 | 0.0 | 0.0 | 0.0 | 0.0 | 0.0 | 0.0 | 0.0 |
| Fabp9         | 0.0 | 0.0 | 0.0 | 0.0 | 0.0 | 0.0 | 0.0 | 0.0 | 0.0 | 0.0 | 0.0 | 0.0 |
| Faim3         | 0.0 | 0.0 | 0.0 | 0.0 | 0.0 | 0.0 | 0.0 | 0.0 | 0.0 | 0.0 | 0.0 | 0.0 |
| Fam122c       | 0.0 | 0.0 | 0.0 | 0.0 | 0.0 | 0.0 | 0.0 | 0.0 | 0.0 | 0.0 | 0.0 | 0.0 |
| Fam150b       | 0.0 | 0.0 | 0.0 | 0.0 | 0.0 | 0.0 | 0.0 | 0.0 | 0.0 | 0.0 | 0.0 | 0.0 |
| Fam162b       | 0.0 | 0.0 | 0.0 | 0.0 | 0.0 | 0.0 | 0.0 | 0.0 | 0.0 | 0.0 | 0.0 | 0.0 |
| Fam183b       | 0.0 | 0.0 | 0.0 | 0.0 | 0.0 | 0.0 | 0.0 | 0.0 | 0.0 | 0.0 | 0.0 | 0.0 |
| Fam47c        | 0.0 | 0.0 | 0.0 | 0.0 | 0.0 | 0.0 | 0.0 | 0.0 | 0.0 | 0.0 | 0.0 | 0.0 |

Excluded Genes

|          |     |     |     |     |     |     |     |     |     |     |     |     |
|----------|-----|-----|-----|-----|-----|-----|-----|-----|-----|-----|-----|-----|
| Fam47e   | 0.0 | 0.0 | 0.0 | 0.0 | 0.0 | 0.0 | 0.0 | 0.0 | 0.0 | 0.0 | 0.0 | 0.0 |
| Fam50b   | 0.0 | 0.0 | 0.0 | 0.0 | 0.0 | 0.0 | 0.0 | 0.0 | 0.0 | 0.0 | 0.0 | 0.0 |
| Fam71b   | 0.0 | 0.0 | 0.0 | 0.0 | 0.0 | 0.0 | 0.0 | 0.0 | 0.0 | 0.0 | 0.0 | 0.0 |
| Fcer1a   | 0.0 | 0.0 | 0.0 | 0.0 | 0.0 | 0.0 | 0.0 | 0.0 | 0.0 | 0.0 | 0.0 | 0.0 |
| Fcnb     | 0.0 | 0.0 | 0.0 | 0.0 | 0.0 | 0.0 | 0.0 | 0.0 | 0.0 | 0.0 | 0.0 | 0.0 |
| Ferd3l   | 0.0 | 0.0 | 0.0 | 0.0 | 0.0 | 0.0 | 0.0 | 0.0 | 0.0 | 0.0 | 0.0 | 0.0 |
| Fev      | 0.0 | 0.0 | 0.0 | 0.0 | 0.0 | 0.0 | 0.0 | 0.0 | 0.0 | 0.0 | 0.0 | 0.0 |
| Fezf1    | 0.0 | 0.0 | 0.0 | 0.0 | 0.0 | 0.0 | 0.0 | 0.0 | 0.0 | 0.0 | 0.0 | 0.0 |
| Fezf2    | 0.0 | 0.0 | 0.0 | 0.0 | 0.0 | 0.0 | 0.0 | 0.0 | 0.0 | 0.0 | 0.0 | 0.0 |
| Ffar1    | 0.0 | 0.0 | 0.0 | 0.0 | 0.0 | 0.0 | 0.0 | 0.0 | 0.0 | 0.0 | 0.0 | 0.0 |
| Ffar2    | 0.0 | 0.0 | 0.0 | 0.0 | 0.0 | 0.0 | 0.0 | 0.0 | 0.0 | 0.0 | 0.0 | 0.0 |
| Ffar3    | 0.0 | 0.0 | 0.0 | 0.0 | 0.0 | 0.0 | 0.0 | 0.0 | 0.0 | 0.0 | 0.0 | 0.0 |
| Fgf3     | 0.0 | 0.0 | 0.0 | 0.0 | 0.0 | 0.0 | 0.0 | 0.0 | 0.0 | 0.0 | 0.0 | 0.0 |
| Fgf4     | 0.0 | 0.0 | 0.0 | 0.0 | 0.0 | 0.0 | 0.0 | 0.0 | 0.0 | 0.0 | 0.0 | 0.0 |
| Fgf6     | 0.0 | 0.0 | 0.0 | 0.0 | 0.0 | 0.0 | 0.0 | 0.0 | 0.0 | 0.0 | 0.0 | 0.0 |
| Fgg      | 0.0 | 0.0 | 0.0 | 0.0 | 0.0 | 0.0 | 0.0 | 0.0 | 0.0 | 0.0 | 0.0 | 0.0 |
| Figla    | 0.0 | 0.0 | 0.0 | 0.0 | 0.0 | 0.0 | 0.0 | 0.0 | 0.0 | 0.0 | 0.0 | 0.0 |
| Foxd4    | 0.0 | 0.0 | 0.0 | 0.0 | 0.0 | 0.0 | 0.0 | 0.0 | 0.0 | 0.0 | 0.0 | 0.0 |
| Foxi3    | 0.0 | 0.0 | 0.0 | 0.0 | 0.0 | 0.0 | 0.0 | 0.0 | 0.0 | 0.0 | 0.0 | 0.0 |
| Foxn4    | 0.0 | 0.0 | 0.0 | 0.0 | 0.0 | 0.0 | 0.0 | 0.0 | 0.0 | 0.0 | 0.0 | 0.0 |
| Fpr-rs4  | 0.0 | 0.0 | 0.0 | 0.0 | 0.0 | 0.0 | 0.0 | 0.0 | 0.0 | 0.0 | 0.0 | 0.0 |
| Fpr-rs6  | 0.0 | 0.0 | 0.0 | 0.0 | 0.0 | 0.0 | 0.0 | 0.0 | 0.0 | 0.0 | 0.0 | 0.0 |
| Fscb     | 0.0 | 0.0 | 0.0 | 0.0 | 0.0 | 0.0 | 0.0 | 0.0 | 0.0 | 0.0 | 0.0 | 0.0 |
| Fthl17   | 0.0 | 0.0 | 0.0 | 0.0 | 0.0 | 0.0 | 0.0 | 0.0 | 0.0 | 0.0 | 0.0 | 0.0 |
| Fut4-ps1 | 0.0 | 0.0 | 0.0 | 0.0 | 0.0 | 0.0 | 0.0 | 0.0 | 0.0 | 0.0 | 0.0 | 0.0 |
| G6pc2    | 0.0 | 0.0 | 0.0 | 0.0 | 0.0 | 0.0 | 0.0 | 0.0 | 0.0 | 0.0 | 0.0 | 0.0 |
| Gabra6   | 0.0 | 0.0 | 0.0 | 0.0 | 0.0 | 0.0 | 0.0 | 0.0 | 0.0 | 0.0 | 0.0 | 0.0 |
| Gast     | 0.0 | 0.0 | 0.0 | 0.0 | 0.0 | 0.0 | 0.0 | 0.0 | 0.0 | 0.0 | 0.0 | 0.0 |
| Gata1    | 0.0 | 0.0 | 0.0 | 0.0 | 0.0 | 0.0 | 0.0 | 0.0 | 0.0 | 0.0 | 0.0 | 0.0 |
| Gcg      | 0.0 | 0.0 | 0.0 | 0.0 | 0.0 | 0.0 | 0.0 | 0.0 | 0.0 | 0.0 | 0.0 | 0.0 |
| Gfi1b    | 0.0 | 0.0 | 0.0 | 0.0 | 0.0 | 0.0 | 0.0 | 0.0 | 0.0 | 0.0 | 0.0 | 0.0 |
| Ghrhr    | 0.0 | 0.0 | 0.0 | 0.0 | 0.0 | 0.0 | 0.0 | 0.0 | 0.0 | 0.0 | 0.0 | 0.0 |
| Gif      | 0.0 | 0.0 | 0.0 | 0.0 | 0.0 | 0.0 | 0.0 | 0.0 | 0.0 | 0.0 | 0.0 | 0.0 |
| Gimap3   | 0.0 | 0.0 | 0.0 | 0.0 | 0.0 | 0.0 | 0.0 | 0.0 | 0.0 | 0.0 | 0.0 | 0.0 |
| Gimap7   | 0.0 | 0.0 | 0.0 | 0.0 | 0.0 | 0.0 | 0.0 | 0.0 | 0.0 | 0.0 | 0.0 | 0.0 |
| Gjb6     | 0.0 | 0.0 | 0.0 | 0.0 | 0.0 | 0.0 | 0.0 | 0.0 | 0.0 | 0.0 | 0.0 | 0.0 |
| Gjd2     | 0.0 | 0.0 | 0.0 | 0.0 | 0.0 | 0.0 | 0.0 | 0.0 | 0.0 | 0.0 | 0.0 | 0.0 |
| Gkn1     | 0.0 | 0.0 | 0.0 | 0.0 | 0.0 | 0.0 | 0.0 | 0.0 | 0.0 | 0.0 | 0.0 | 0.0 |
| Gkn2     | 0.0 | 0.0 | 0.0 | 0.0 | 0.0 | 0.0 | 0.0 | 0.0 | 0.0 | 0.0 | 0.0 | 0.0 |
| Glod5    | 0.0 | 0.0 | 0.0 | 0.0 | 0.0 | 0.0 | 0.0 | 0.0 | 0.0 | 0.0 | 0.0 | 0.0 |
| Glytl3   | 0.0 | 0.0 | 0.0 | 0.0 | 0.0 | 0.0 | 0.0 | 0.0 | 0.0 | 0.0 | 0.0 | 0.0 |
| Glycam1  | 0.0 | 0.0 | 0.0 | 0.0 | 0.0 | 0.0 | 0.0 | 0.0 | 0.0 | 0.0 | 0.0 | 0.0 |
| Gm10024  | 0.0 | 0.0 | 0.0 | 0.0 | 0.0 | 0.0 | 0.0 | 0.0 | 0.0 | 0.0 | 0.0 | 0.0 |
| Gm10081  | 0.0 | 0.0 | 0.0 | 0.0 | 0.0 | 0.0 | 0.0 | 0.0 | 0.0 | 0.0 | 0.0 | 0.0 |
| Gm10100  | 0.0 | 0.0 | 0.0 | 0.0 | 0.0 | 0.0 | 0.0 | 0.0 | 0.0 | 0.0 | 0.0 | 0.0 |
| Gm10104  | 0.0 | 0.0 | 0.0 | 0.0 | 0.0 | 0.0 | 0.0 | 0.0 | 0.0 | 0.0 | 0.0 | 0.0 |
| Gm10142  | 0.0 | 0.0 | 0.0 | 0.0 | 0.0 | 0.0 | 0.0 | 0.0 | 0.0 | 0.0 | 0.0 | 0.0 |
| Gm10228  | 0.0 | 0.0 | 0.0 | 0.0 | 0.0 | 0.0 | 0.0 | 0.0 | 0.0 | 0.0 | 0.0 | 0.0 |
| Gm10229  | 0.0 | 0.0 | 0.0 | 0.0 | 0.0 | 0.0 | 0.0 | 0.0 | 0.0 | 0.0 | 0.0 | 0.0 |
| Gm10267  | 0.0 | 0.0 | 0.0 | 0.0 | 0.0 | 0.0 | 0.0 | 0.0 | 0.0 | 0.0 | 0.0 | 0.0 |
| Gm10272  | 0.0 | 0.0 | 0.0 | 0.0 | 0.0 | 0.0 | 0.0 | 0.0 | 0.0 | 0.0 | 0.0 | 0.0 |
| Gm10319  | 0.0 | 0.0 | 0.0 | 0.0 | 0.0 | 0.0 | 0.0 | 0.0 | 0.0 | 0.0 | 0.0 | 0.0 |
| Gm10334  | 0.0 | 0.0 | 0.0 | 0.0 | 0.0 | 0.0 | 0.0 | 0.0 | 0.0 | 0.0 | 0.0 | 0.0 |
| Gm10421  | 0.0 | 0.0 | 0.0 | 0.0 | 0.0 | 0.0 | 0.0 | 0.0 | 0.0 | 0.0 | 0.0 | 0.0 |
| Gm10445  | 0.0 | 0.0 | 0.0 | 0.0 | 0.0 | 0.0 | 0.0 | 0.0 | 0.0 | 0.0 | 0.0 | 0.0 |
| Gm10510  | 0.0 | 0.0 | 0.0 | 0.0 | 0.0 | 0.0 | 0.0 | 0.0 | 0.0 | 0.0 | 0.0 | 0.0 |
| Gm10556  | 0.0 | 0.0 | 0.0 | 0.0 | 0.0 | 0.0 | 0.0 | 0.0 | 0.0 | 0.0 | 0.0 | 0.0 |

Excluded Genes













|               |     |     |     |     |     |     |     |     |     |     |     |     |
|---------------|-----|-----|-----|-----|-----|-----|-----|-----|-----|-----|-----|-----|
| Hbb-bh1       | 0.0 | 0.0 | 0.0 | 0.0 | 0.0 | 0.0 | 0.0 | 0.0 | 0.0 | 0.0 | 0.0 | 0.0 |
| Hbb-bh2       | 0.0 | 0.0 | 0.0 | 0.0 | 0.0 | 0.0 | 0.0 | 0.0 | 0.0 | 0.0 | 0.0 | 0.0 |
| Hbb-y         | 0.0 | 0.0 | 0.0 | 0.0 | 0.0 | 0.0 | 0.0 | 0.0 | 0.0 | 0.0 | 0.0 | 0.0 |
| Hbq1a         | 0.0 | 0.0 | 0.0 | 0.0 | 0.0 | 0.0 | 0.0 | 0.0 | 0.0 | 0.0 | 0.0 | 0.0 |
| Hbq1b         | 0.0 | 0.0 | 0.0 | 0.0 | 0.0 | 0.0 | 0.0 | 0.0 | 0.0 | 0.0 | 0.0 | 0.0 |
| Hdglf1        | 0.0 | 0.0 | 0.0 | 0.0 | 0.0 | 0.0 | 0.0 | 0.0 | 0.0 | 0.0 | 0.0 | 0.0 |
| Helt          | 0.0 | 0.0 | 0.0 | 0.0 | 0.0 | 0.0 | 0.0 | 0.0 | 0.0 | 0.0 | 0.0 | 0.0 |
| Hhla1         | 0.0 | 0.0 | 0.0 | 0.0 | 0.0 | 0.0 | 0.0 | 0.0 | 0.0 | 0.0 | 0.0 | 0.0 |
| Higd1c        | 0.0 | 0.0 | 0.0 | 0.0 | 0.0 | 0.0 | 0.0 | 0.0 | 0.0 | 0.0 | 0.0 | 0.0 |
| Hmgb4         | 0.0 | 0.0 | 0.0 | 0.0 | 0.0 | 0.0 | 0.0 | 0.0 | 0.0 | 0.0 | 0.0 | 0.0 |
| Hmx3          | 0.0 | 0.0 | 0.0 | 0.0 | 0.0 | 0.0 | 0.0 | 0.0 | 0.0 | 0.0 | 0.0 | 0.0 |
| Hnf4a         | 0.0 | 0.0 | 0.0 | 0.0 | 0.0 | 0.0 | 0.0 | 0.0 | 0.0 | 0.0 | 0.0 | 0.0 |
| Hnf4g         | 0.0 | 0.0 | 0.0 | 0.0 | 0.0 | 0.0 | 0.0 | 0.0 | 0.0 | 0.0 | 0.0 | 0.0 |
| Hotair        | 0.0 | 0.0 | 0.0 | 0.0 | 0.0 | 0.0 | 0.0 | 0.0 | 0.0 | 0.0 | 0.0 | 0.0 |
| Hoxb1         | 0.0 | 0.0 | 0.0 | 0.0 | 0.0 | 0.0 | 0.0 | 0.0 | 0.0 | 0.0 | 0.0 | 0.0 |
| Hoxd11        | 0.0 | 0.0 | 0.0 | 0.0 | 0.0 | 0.0 | 0.0 | 0.0 | 0.0 | 0.0 | 0.0 | 0.0 |
| Hoxd12        | 0.0 | 0.0 | 0.0 | 0.0 | 0.0 | 0.0 | 0.0 | 0.0 | 0.0 | 0.0 | 0.0 | 0.0 |
| Hrg           | 0.0 | 0.0 | 0.0 | 0.0 | 0.0 | 0.0 | 0.0 | 0.0 | 0.0 | 0.0 | 0.0 | 0.0 |
| Hrh4          | 0.0 | 0.0 | 0.0 | 0.0 | 0.0 | 0.0 | 0.0 | 0.0 | 0.0 | 0.0 | 0.0 | 0.0 |
| Hrnr          | 0.0 | 0.0 | 0.0 | 0.0 | 0.0 | 0.0 | 0.0 | 0.0 | 0.0 | 0.0 | 0.0 | 0.0 |
| Hsfy2         | 0.0 | 0.0 | 0.0 | 0.0 | 0.0 | 0.0 | 0.0 | 0.0 | 0.0 | 0.0 | 0.0 | 0.0 |
| Htr1a         | 0.0 | 0.0 | 0.0 | 0.0 | 0.0 | 0.0 | 0.0 | 0.0 | 0.0 | 0.0 | 0.0 | 0.0 |
| Hyal4         | 0.0 | 0.0 | 0.0 | 0.0 | 0.0 | 0.0 | 0.0 | 0.0 | 0.0 | 0.0 | 0.0 | 0.0 |
| I730030J21Rik | 0.0 | 0.0 | 0.0 | 0.0 | 0.0 | 0.0 | 0.0 | 0.0 | 0.0 | 0.0 | 0.0 | 0.0 |
| Ifna1         | 0.0 | 0.0 | 0.0 | 0.0 | 0.0 | 0.0 | 0.0 | 0.0 | 0.0 | 0.0 | 0.0 | 0.0 |
| Ifna11        | 0.0 | 0.0 | 0.0 | 0.0 | 0.0 | 0.0 | 0.0 | 0.0 | 0.0 | 0.0 | 0.0 | 0.0 |
| Ifna12        | 0.0 | 0.0 | 0.0 | 0.0 | 0.0 | 0.0 | 0.0 | 0.0 | 0.0 | 0.0 | 0.0 | 0.0 |
| Ifna14        | 0.0 | 0.0 | 0.0 | 0.0 | 0.0 | 0.0 | 0.0 | 0.0 | 0.0 | 0.0 | 0.0 | 0.0 |
| Ifna2         | 0.0 | 0.0 | 0.0 | 0.0 | 0.0 | 0.0 | 0.0 | 0.0 | 0.0 | 0.0 | 0.0 | 0.0 |
| Ifna4         | 0.0 | 0.0 | 0.0 | 0.0 | 0.0 | 0.0 | 0.0 | 0.0 | 0.0 | 0.0 | 0.0 | 0.0 |
| Ifna5         | 0.0 | 0.0 | 0.0 | 0.0 | 0.0 | 0.0 | 0.0 | 0.0 | 0.0 | 0.0 | 0.0 | 0.0 |
| Ifna7         | 0.0 | 0.0 | 0.0 | 0.0 | 0.0 | 0.0 | 0.0 | 0.0 | 0.0 | 0.0 | 0.0 | 0.0 |
| Ifna9         | 0.0 | 0.0 | 0.0 | 0.0 | 0.0 | 0.0 | 0.0 | 0.0 | 0.0 | 0.0 | 0.0 | 0.0 |
| Ifnl2         | 0.0 | 0.0 | 0.0 | 0.0 | 0.0 | 0.0 | 0.0 | 0.0 | 0.0 | 0.0 | 0.0 | 0.0 |
| Ifnl3         | 0.0 | 0.0 | 0.0 | 0.0 | 0.0 | 0.0 | 0.0 | 0.0 | 0.0 | 0.0 | 0.0 | 0.0 |
| Igfbp1b       | 0.0 | 0.0 | 0.0 | 0.0 | 0.0 | 0.0 | 0.0 | 0.0 | 0.0 | 0.0 | 0.0 | 0.0 |
| Igfbp1        | 0.0 | 0.0 | 0.0 | 0.0 | 0.0 | 0.0 | 0.0 | 0.0 | 0.0 | 0.0 | 0.0 | 0.0 |
| Igf3          | 0.0 | 0.0 | 0.0 | 0.0 | 0.0 | 0.0 | 0.0 | 0.0 | 0.0 | 0.0 | 0.0 | 0.0 |
| Il13          | 0.0 | 0.0 | 0.0 | 0.0 | 0.0 | 0.0 | 0.0 | 0.0 | 0.0 | 0.0 | 0.0 | 0.0 |
| Il17f         | 0.0 | 0.0 | 0.0 | 0.0 | 0.0 | 0.0 | 0.0 | 0.0 | 0.0 | 0.0 | 0.0 | 0.0 |
| Il1f6         | 0.0 | 0.0 | 0.0 | 0.0 | 0.0 | 0.0 | 0.0 | 0.0 | 0.0 | 0.0 | 0.0 | 0.0 |
| Il2           | 0.0 | 0.0 | 0.0 | 0.0 | 0.0 | 0.0 | 0.0 | 0.0 | 0.0 | 0.0 | 0.0 | 0.0 |
| Il20          | 0.0 | 0.0 | 0.0 | 0.0 | 0.0 | 0.0 | 0.0 | 0.0 | 0.0 | 0.0 | 0.0 | 0.0 |
| Il22          | 0.0 | 0.0 | 0.0 | 0.0 | 0.0 | 0.0 | 0.0 | 0.0 | 0.0 | 0.0 | 0.0 | 0.0 |
| Il3           | 0.0 | 0.0 | 0.0 | 0.0 | 0.0 | 0.0 | 0.0 | 0.0 | 0.0 | 0.0 | 0.0 | 0.0 |
| Il9           | 0.0 | 0.0 | 0.0 | 0.0 | 0.0 | 0.0 | 0.0 | 0.0 | 0.0 | 0.0 | 0.0 | 0.0 |
| Ins1          | 0.0 | 0.0 | 0.0 | 0.0 | 0.0 | 0.0 | 0.0 | 0.0 | 0.0 | 0.0 | 0.0 | 0.0 |
| Insm1         | 0.0 | 0.0 | 0.0 | 0.0 | 0.0 | 0.0 | 0.0 | 0.0 | 0.0 | 0.0 | 0.0 | 0.0 |
| Iqcf1         | 0.0 | 0.0 | 0.0 | 0.0 | 0.0 | 0.0 | 0.0 | 0.0 | 0.0 | 0.0 | 0.0 | 0.0 |
| Iqcf3         | 0.0 | 0.0 | 0.0 | 0.0 | 0.0 | 0.0 | 0.0 | 0.0 | 0.0 | 0.0 | 0.0 | 0.0 |
| Iqcf4         | 0.0 | 0.0 | 0.0 | 0.0 | 0.0 | 0.0 | 0.0 | 0.0 | 0.0 | 0.0 | 0.0 | 0.0 |
| Iqcf6         | 0.0 | 0.0 | 0.0 | 0.0 | 0.0 | 0.0 | 0.0 | 0.0 | 0.0 | 0.0 | 0.0 | 0.0 |
| Isx           | 0.0 | 0.0 | 0.0 | 0.0 | 0.0 | 0.0 | 0.0 | 0.0 | 0.0 | 0.0 | 0.0 | 0.0 |
| Itgb2l        | 0.0 | 0.0 | 0.0 | 0.0 | 0.0 | 0.0 | 0.0 | 0.0 | 0.0 | 0.0 | 0.0 | 0.0 |
| Iyd           | 0.0 | 0.0 | 0.0 | 0.0 | 0.0 | 0.0 | 0.0 | 0.0 | 0.0 | 0.0 | 0.0 | 0.0 |
| Izumo2        | 0.0 | 0.0 | 0.0 | 0.0 | 0.0 | 0.0 | 0.0 | 0.0 | 0.0 | 0.0 | 0.0 | 0.0 |
| Izumo3        | 0.0 | 0.0 | 0.0 | 0.0 | 0.0 | 0.0 | 0.0 | 0.0 | 0.0 | 0.0 | 0.0 | 0.0 |

Excluded Genes



































































|           |     |     |     |     |     |     |     |     |     |     |     |     |
|-----------|-----|-----|-----|-----|-----|-----|-----|-----|-----|-----|-----|-----|
| Olf975    | 0.0 | 0.0 | 0.0 | 0.0 | 0.0 | 0.0 | 0.0 | 0.0 | 0.0 | 0.0 | 0.0 | 0.0 |
| Olf976    | 0.0 | 0.0 | 0.0 | 0.0 | 0.0 | 0.0 | 0.0 | 0.0 | 0.0 | 0.0 | 0.0 | 0.0 |
| Olf978    | 0.0 | 0.0 | 0.0 | 0.0 | 0.0 | 0.0 | 0.0 | 0.0 | 0.0 | 0.0 | 0.0 | 0.0 |
| Olf979    | 0.0 | 0.0 | 0.0 | 0.0 | 0.0 | 0.0 | 0.0 | 0.0 | 0.0 | 0.0 | 0.0 | 0.0 |
| Olf980    | 0.0 | 0.0 | 0.0 | 0.0 | 0.0 | 0.0 | 0.0 | 0.0 | 0.0 | 0.0 | 0.0 | 0.0 |
| Olf981    | 0.0 | 0.0 | 0.0 | 0.0 | 0.0 | 0.0 | 0.0 | 0.0 | 0.0 | 0.0 | 0.0 | 0.0 |
| Olf983    | 0.0 | 0.0 | 0.0 | 0.0 | 0.0 | 0.0 | 0.0 | 0.0 | 0.0 | 0.0 | 0.0 | 0.0 |
| Olf984    | 0.0 | 0.0 | 0.0 | 0.0 | 0.0 | 0.0 | 0.0 | 0.0 | 0.0 | 0.0 | 0.0 | 0.0 |
| Olf985    | 0.0 | 0.0 | 0.0 | 0.0 | 0.0 | 0.0 | 0.0 | 0.0 | 0.0 | 0.0 | 0.0 | 0.0 |
| Olf986    | 0.0 | 0.0 | 0.0 | 0.0 | 0.0 | 0.0 | 0.0 | 0.0 | 0.0 | 0.0 | 0.0 | 0.0 |
| Olf987    | 0.0 | 0.0 | 0.0 | 0.0 | 0.0 | 0.0 | 0.0 | 0.0 | 0.0 | 0.0 | 0.0 | 0.0 |
| Olf992    | 0.0 | 0.0 | 0.0 | 0.0 | 0.0 | 0.0 | 0.0 | 0.0 | 0.0 | 0.0 | 0.0 | 0.0 |
| Olf993    | 0.0 | 0.0 | 0.0 | 0.0 | 0.0 | 0.0 | 0.0 | 0.0 | 0.0 | 0.0 | 0.0 | 0.0 |
| Olf995    | 0.0 | 0.0 | 0.0 | 0.0 | 0.0 | 0.0 | 0.0 | 0.0 | 0.0 | 0.0 | 0.0 | 0.0 |
| Olf996    | 0.0 | 0.0 | 0.0 | 0.0 | 0.0 | 0.0 | 0.0 | 0.0 | 0.0 | 0.0 | 0.0 | 0.0 |
| Olf998    | 0.0 | 0.0 | 0.0 | 0.0 | 0.0 | 0.0 | 0.0 | 0.0 | 0.0 | 0.0 | 0.0 | 0.0 |
| Olig1     | 0.0 | 0.0 | 0.0 | 0.0 | 0.0 | 0.0 | 0.0 | 0.0 | 0.0 | 0.0 | 0.0 | 0.0 |
| Omt2a     | 0.0 | 0.0 | 0.0 | 0.0 | 0.0 | 0.0 | 0.0 | 0.0 | 0.0 | 0.0 | 0.0 | 0.0 |
| Omt2b     | 0.0 | 0.0 | 0.0 | 0.0 | 0.0 | 0.0 | 0.0 | 0.0 | 0.0 | 0.0 | 0.0 | 0.0 |
| Ooep      | 0.0 | 0.0 | 0.0 | 0.0 | 0.0 | 0.0 | 0.0 | 0.0 | 0.0 | 0.0 | 0.0 | 0.0 |
| Oog4      | 0.0 | 0.0 | 0.0 | 0.0 | 0.0 | 0.0 | 0.0 | 0.0 | 0.0 | 0.0 | 0.0 | 0.0 |
| Otol1     | 0.0 | 0.0 | 0.0 | 0.0 | 0.0 | 0.0 | 0.0 | 0.0 | 0.0 | 0.0 | 0.0 | 0.0 |
| Otop3     | 0.0 | 0.0 | 0.0 | 0.0 | 0.0 | 0.0 | 0.0 | 0.0 | 0.0 | 0.0 | 0.0 | 0.0 |
| Otor      | 0.0 | 0.0 | 0.0 | 0.0 | 0.0 | 0.0 | 0.0 | 0.0 | 0.0 | 0.0 | 0.0 | 0.0 |
| Otp       | 0.0 | 0.0 | 0.0 | 0.0 | 0.0 | 0.0 | 0.0 | 0.0 | 0.0 | 0.0 | 0.0 | 0.0 |
| Otx2      | 0.0 | 0.0 | 0.0 | 0.0 | 0.0 | 0.0 | 0.0 | 0.0 | 0.0 | 0.0 | 0.0 | 0.0 |
| Otx2os1   | 0.0 | 0.0 | 0.0 | 0.0 | 0.0 | 0.0 | 0.0 | 0.0 | 0.0 | 0.0 | 0.0 | 0.0 |
| Oxt       | 0.0 | 0.0 | 0.0 | 0.0 | 0.0 | 0.0 | 0.0 | 0.0 | 0.0 | 0.0 | 0.0 | 0.0 |
| Pbsn      | 0.0 | 0.0 | 0.0 | 0.0 | 0.0 | 0.0 | 0.0 | 0.0 | 0.0 | 0.0 | 0.0 | 0.0 |
| Pck1      | 0.0 | 0.0 | 0.0 | 0.0 | 0.0 | 0.0 | 0.0 | 0.0 | 0.0 | 0.0 | 0.0 | 0.0 |
| Pcp4      | 0.0 | 0.0 | 0.0 | 0.0 | 0.0 | 0.0 | 0.0 | 0.0 | 0.0 | 0.0 | 0.0 | 0.0 |
| Pdc       | 0.0 | 0.0 | 0.0 | 0.0 | 0.0 | 0.0 | 0.0 | 0.0 | 0.0 | 0.0 | 0.0 | 0.0 |
| Pdha2     | 0.0 | 0.0 | 0.0 | 0.0 | 0.0 | 0.0 | 0.0 | 0.0 | 0.0 | 0.0 | 0.0 | 0.0 |
| Pdilt     | 0.0 | 0.0 | 0.0 | 0.0 | 0.0 | 0.0 | 0.0 | 0.0 | 0.0 | 0.0 | 0.0 | 0.0 |
| Pdx1      | 0.0 | 0.0 | 0.0 | 0.0 | 0.0 | 0.0 | 0.0 | 0.0 | 0.0 | 0.0 | 0.0 | 0.0 |
| Pfn3      | 0.0 | 0.0 | 0.0 | 0.0 | 0.0 | 0.0 | 0.0 | 0.0 | 0.0 | 0.0 | 0.0 | 0.0 |
| Pgc       | 0.0 | 0.0 | 0.0 | 0.0 | 0.0 | 0.0 | 0.0 | 0.0 | 0.0 | 0.0 | 0.0 | 0.0 |
| Pgk2      | 0.0 | 0.0 | 0.0 | 0.0 | 0.0 | 0.0 | 0.0 | 0.0 | 0.0 | 0.0 | 0.0 | 0.0 |
| Pgr15l    | 0.0 | 0.0 | 0.0 | 0.0 | 0.0 | 0.0 | 0.0 | 0.0 | 0.0 | 0.0 | 0.0 | 0.0 |
| Phox2b    | 0.0 | 0.0 | 0.0 | 0.0 | 0.0 | 0.0 | 0.0 | 0.0 | 0.0 | 0.0 | 0.0 | 0.0 |
| Pifo      | 0.0 | 0.0 | 0.0 | 0.0 | 0.0 | 0.0 | 0.0 | 0.0 | 0.0 | 0.0 | 0.0 | 0.0 |
| Pih1d3    | 0.0 | 0.0 | 0.0 | 0.0 | 0.0 | 0.0 | 0.0 | 0.0 | 0.0 | 0.0 | 0.0 | 0.0 |
| Pinc      | 0.0 | 0.0 | 0.0 | 0.0 | 0.0 | 0.0 | 0.0 | 0.0 | 0.0 | 0.0 | 0.0 | 0.0 |
| Pip       | 0.0 | 0.0 | 0.0 | 0.0 | 0.0 | 0.0 | 0.0 | 0.0 | 0.0 | 0.0 | 0.0 | 0.0 |
| Pisd-ps3  | 0.0 | 0.0 | 0.0 | 0.0 | 0.0 | 0.0 | 0.0 | 0.0 | 0.0 | 0.0 | 0.0 | 0.0 |
| Pla2g2a   | 0.0 | 0.0 | 0.0 | 0.0 | 0.0 | 0.0 | 0.0 | 0.0 | 0.0 | 0.0 | 0.0 | 0.0 |
| Pla2g2f   | 0.0 | 0.0 | 0.0 | 0.0 | 0.0 | 0.0 | 0.0 | 0.0 | 0.0 | 0.0 | 0.0 | 0.0 |
| Pla2g4d   | 0.0 | 0.0 | 0.0 | 0.0 | 0.0 | 0.0 | 0.0 | 0.0 | 0.0 | 0.0 | 0.0 | 0.0 |
| Plac1l    | 0.0 | 0.0 | 0.0 | 0.0 | 0.0 | 0.0 | 0.0 | 0.0 | 0.0 | 0.0 | 0.0 | 0.0 |
| Pldi      | 0.0 | 0.0 | 0.0 | 0.0 | 0.0 | 0.0 | 0.0 | 0.0 | 0.0 | 0.0 | 0.0 | 0.0 |
| Plg       | 0.0 | 0.0 | 0.0 | 0.0 | 0.0 | 0.0 | 0.0 | 0.0 | 0.0 | 0.0 | 0.0 | 0.0 |
| Pnpla5    | 0.0 | 0.0 | 0.0 | 0.0 | 0.0 | 0.0 | 0.0 | 0.0 | 0.0 | 0.0 | 0.0 | 0.0 |
| Pom121l12 | 0.0 | 0.0 | 0.0 | 0.0 | 0.0 | 0.0 | 0.0 | 0.0 | 0.0 | 0.0 | 0.0 | 0.0 |
| Poteg     | 0.0 | 0.0 | 0.0 | 0.0 | 0.0 | 0.0 | 0.0 | 0.0 | 0.0 | 0.0 | 0.0 | 0.0 |
| Pou1f1    | 0.0 | 0.0 | 0.0 | 0.0 | 0.0 | 0.0 | 0.0 | 0.0 | 0.0 | 0.0 | 0.0 | 0.0 |
| Pou4f2    | 0.0 | 0.0 | 0.0 | 0.0 | 0.0 | 0.0 | 0.0 | 0.0 | 0.0 | 0.0 | 0.0 | 0.0 |
| Ppp1r14d  | 0.0 | 0.0 | 0.0 | 0.0 | 0.0 | 0.0 | 0.0 | 0.0 | 0.0 | 0.0 | 0.0 | 0.0 |

Excluded Genes













|             |     |     |     |     |     |     |     |     |     |     |     |     |
|-------------|-----|-----|-----|-----|-----|-----|-----|-----|-----|-----|-----|-----|
| Tcl1b5      | 0.0 | 0.0 | 0.0 | 0.0 | 0.0 | 0.0 | 0.0 | 0.0 | 0.0 | 0.0 | 0.0 | 0.0 |
| Tcstv1      | 0.0 | 0.0 | 0.0 | 0.0 | 0.0 | 0.0 | 0.0 | 0.0 | 0.0 | 0.0 | 0.0 | 0.0 |
| Tcstv3      | 0.0 | 0.0 | 0.0 | 0.0 | 0.0 | 0.0 | 0.0 | 0.0 | 0.0 | 0.0 | 0.0 | 0.0 |
| Tcte1       | 0.0 | 0.0 | 0.0 | 0.0 | 0.0 | 0.0 | 0.0 | 0.0 | 0.0 | 0.0 | 0.0 | 0.0 |
| Tctex1d1    | 0.0 | 0.0 | 0.0 | 0.0 | 0.0 | 0.0 | 0.0 | 0.0 | 0.0 | 0.0 | 0.0 | 0.0 |
| Tdpoz2      | 0.0 | 0.0 | 0.0 | 0.0 | 0.0 | 0.0 | 0.0 | 0.0 | 0.0 | 0.0 | 0.0 | 0.0 |
| Tdpoz4      | 0.0 | 0.0 | 0.0 | 0.0 | 0.0 | 0.0 | 0.0 | 0.0 | 0.0 | 0.0 | 0.0 | 0.0 |
| Tekt4       | 0.0 | 0.0 | 0.0 | 0.0 | 0.0 | 0.0 | 0.0 | 0.0 | 0.0 | 0.0 | 0.0 | 0.0 |
| Tespa1      | 0.0 | 0.0 | 0.0 | 0.0 | 0.0 | 0.0 | 0.0 | 0.0 | 0.0 | 0.0 | 0.0 | 0.0 |
| Tex13a      | 0.0 | 0.0 | 0.0 | 0.0 | 0.0 | 0.0 | 0.0 | 0.0 | 0.0 | 0.0 | 0.0 | 0.0 |
| Tex19.2     | 0.0 | 0.0 | 0.0 | 0.0 | 0.0 | 0.0 | 0.0 | 0.0 | 0.0 | 0.0 | 0.0 | 0.0 |
| Tex28       | 0.0 | 0.0 | 0.0 | 0.0 | 0.0 | 0.0 | 0.0 | 0.0 | 0.0 | 0.0 | 0.0 | 0.0 |
| Tex36       | 0.0 | 0.0 | 0.0 | 0.0 | 0.0 | 0.0 | 0.0 | 0.0 | 0.0 | 0.0 | 0.0 | 0.0 |
| Tfap2d      | 0.0 | 0.0 | 0.0 | 0.0 | 0.0 | 0.0 | 0.0 | 0.0 | 0.0 | 0.0 | 0.0 | 0.0 |
| Tff2        | 0.0 | 0.0 | 0.0 | 0.0 | 0.0 | 0.0 | 0.0 | 0.0 | 0.0 | 0.0 | 0.0 | 0.0 |
| Tff3        | 0.0 | 0.0 | 0.0 | 0.0 | 0.0 | 0.0 | 0.0 | 0.0 | 0.0 | 0.0 | 0.0 | 0.0 |
| Tlr11       | 0.0 | 0.0 | 0.0 | 0.0 | 0.0 | 0.0 | 0.0 | 0.0 | 0.0 | 0.0 | 0.0 | 0.0 |
| Tlr12       | 0.0 | 0.0 | 0.0 | 0.0 | 0.0 | 0.0 | 0.0 | 0.0 | 0.0 | 0.0 | 0.0 | 0.0 |
| Tmco5       | 0.0 | 0.0 | 0.0 | 0.0 | 0.0 | 0.0 | 0.0 | 0.0 | 0.0 | 0.0 | 0.0 | 0.0 |
| Tmco5b      | 0.0 | 0.0 | 0.0 | 0.0 | 0.0 | 0.0 | 0.0 | 0.0 | 0.0 | 0.0 | 0.0 | 0.0 |
| Tmed11      | 0.0 | 0.0 | 0.0 | 0.0 | 0.0 | 0.0 | 0.0 | 0.0 | 0.0 | 0.0 | 0.0 | 0.0 |
| Tmem145     | 0.0 | 0.0 | 0.0 | 0.0 | 0.0 | 0.0 | 0.0 | 0.0 | 0.0 | 0.0 | 0.0 | 0.0 |
| Tmem174     | 0.0 | 0.0 | 0.0 | 0.0 | 0.0 | 0.0 | 0.0 | 0.0 | 0.0 | 0.0 | 0.0 | 0.0 |
| Tmem207     | 0.0 | 0.0 | 0.0 | 0.0 | 0.0 | 0.0 | 0.0 | 0.0 | 0.0 | 0.0 | 0.0 | 0.0 |
| Tmem211     | 0.0 | 0.0 | 0.0 | 0.0 | 0.0 | 0.0 | 0.0 | 0.0 | 0.0 | 0.0 | 0.0 | 0.0 |
| Tmem213     | 0.0 | 0.0 | 0.0 | 0.0 | 0.0 | 0.0 | 0.0 | 0.0 | 0.0 | 0.0 | 0.0 | 0.0 |
| Tmem225     | 0.0 | 0.0 | 0.0 | 0.0 | 0.0 | 0.0 | 0.0 | 0.0 | 0.0 | 0.0 | 0.0 | 0.0 |
| Tmem229a    | 0.0 | 0.0 | 0.0 | 0.0 | 0.0 | 0.0 | 0.0 | 0.0 | 0.0 | 0.0 | 0.0 | 0.0 |
| Tmem89      | 0.0 | 0.0 | 0.0 | 0.0 | 0.0 | 0.0 | 0.0 | 0.0 | 0.0 | 0.0 | 0.0 | 0.0 |
| Tmem92      | 0.0 | 0.0 | 0.0 | 0.0 | 0.0 | 0.0 | 0.0 | 0.0 | 0.0 | 0.0 | 0.0 | 0.0 |
| Tmlhe       | 0.0 | 0.0 | 0.0 | 0.0 | 0.0 | 0.0 | 0.0 | 0.0 | 0.0 | 0.0 | 0.0 | 0.0 |
| Tmprss11bni | 0.0 | 0.0 | 0.0 | 0.0 | 0.0 | 0.0 | 0.0 | 0.0 | 0.0 | 0.0 | 0.0 | 0.0 |
| Tmprss11f   | 0.0 | 0.0 | 0.0 | 0.0 | 0.0 | 0.0 | 0.0 | 0.0 | 0.0 | 0.0 | 0.0 | 0.0 |
| Tmprss3     | 0.0 | 0.0 | 0.0 | 0.0 | 0.0 | 0.0 | 0.0 | 0.0 | 0.0 | 0.0 | 0.0 | 0.0 |
| Tmprss4     | 0.0 | 0.0 | 0.0 | 0.0 | 0.0 | 0.0 | 0.0 | 0.0 | 0.0 | 0.0 | 0.0 | 0.0 |
| Tnfrsf17    | 0.0 | 0.0 | 0.0 | 0.0 | 0.0 | 0.0 | 0.0 | 0.0 | 0.0 | 0.0 | 0.0 | 0.0 |
| Tnp1        | 0.0 | 0.0 | 0.0 | 0.0 | 0.0 | 0.0 | 0.0 | 0.0 | 0.0 | 0.0 | 0.0 | 0.0 |
| Tomm20l     | 0.0 | 0.0 | 0.0 | 0.0 | 0.0 | 0.0 | 0.0 | 0.0 | 0.0 | 0.0 | 0.0 | 0.0 |
| Tpbpa       | 0.0 | 0.0 | 0.0 | 0.0 | 0.0 | 0.0 | 0.0 | 0.0 | 0.0 | 0.0 | 0.0 | 0.0 |
| Tpbpb       | 0.0 | 0.0 | 0.0 | 0.0 | 0.0 | 0.0 | 0.0 | 0.0 | 0.0 | 0.0 | 0.0 | 0.0 |
| Tpsab1      | 0.0 | 0.0 | 0.0 | 0.0 | 0.0 | 0.0 | 0.0 | 0.0 | 0.0 | 0.0 | 0.0 | 0.0 |
| Tpsb2       | 0.0 | 0.0 | 0.0 | 0.0 | 0.0 | 0.0 | 0.0 | 0.0 | 0.0 | 0.0 | 0.0 | 0.0 |
| Trim31      | 0.0 | 0.0 | 0.0 | 0.0 | 0.0 | 0.0 | 0.0 | 0.0 | 0.0 | 0.0 | 0.0 | 0.0 |
| Trim42      | 0.0 | 0.0 | 0.0 | 0.0 | 0.0 | 0.0 | 0.0 | 0.0 | 0.0 | 0.0 | 0.0 | 0.0 |
| Trim55      | 0.0 | 0.0 | 0.0 | 0.0 | 0.0 | 0.0 | 0.0 | 0.0 | 0.0 | 0.0 | 0.0 | 0.0 |
| Trim58      | 0.0 | 0.0 | 0.0 | 0.0 | 0.0 | 0.0 | 0.0 | 0.0 | 0.0 | 0.0 | 0.0 | 0.0 |
| Trim60      | 0.0 | 0.0 | 0.0 | 0.0 | 0.0 | 0.0 | 0.0 | 0.0 | 0.0 | 0.0 | 0.0 | 0.0 |
| Trim61      | 0.0 | 0.0 | 0.0 | 0.0 | 0.0 | 0.0 | 0.0 | 0.0 | 0.0 | 0.0 | 0.0 | 0.0 |
| Trpv5       | 0.0 | 0.0 | 0.0 | 0.0 | 0.0 | 0.0 | 0.0 | 0.0 | 0.0 | 0.0 | 0.0 | 0.0 |
| Try10       | 0.0 | 0.0 | 0.0 | 0.0 | 0.0 | 0.0 | 0.0 | 0.0 | 0.0 | 0.0 | 0.0 | 0.0 |
| Tsga8       | 0.0 | 0.0 | 0.0 | 0.0 | 0.0 | 0.0 | 0.0 | 0.0 | 0.0 | 0.0 | 0.0 | 0.0 |
| Tspo2       | 0.0 | 0.0 | 0.0 | 0.0 | 0.0 | 0.0 | 0.0 | 0.0 | 0.0 | 0.0 | 0.0 | 0.0 |
| Tspy-ps     | 0.0 | 0.0 | 0.0 | 0.0 | 0.0 | 0.0 | 0.0 | 0.0 | 0.0 | 0.0 | 0.0 | 0.0 |
| Tubal3      | 0.0 | 0.0 | 0.0 | 0.0 | 0.0 | 0.0 | 0.0 | 0.0 | 0.0 | 0.0 | 0.0 | 0.0 |
| Txndc8      | 0.0 | 0.0 | 0.0 | 0.0 | 0.0 | 0.0 | 0.0 | 0.0 | 0.0 | 0.0 | 0.0 | 0.0 |
| Ubash3a     | 0.0 | 0.0 | 0.0 | 0.0 | 0.0 | 0.0 | 0.0 | 0.0 | 0.0 | 0.0 | 0.0 | 0.0 |
| Ube2dn1l    | 0.0 | 0.0 | 0.0 | 0.0 | 0.0 | 0.0 | 0.0 | 0.0 | 0.0 | 0.0 | 0.0 | 0.0 |

Excluded Genes
