# Supplementary material for: Fibroblast polarization over the myocardial infarction time continuum shifts roles from inflammation to angiogenesis
Source: PubMed Central journal article supplement (PMC6329742; doi:10.1007/s00395-019-0715-4), 2019-01-11
Supplement: 395_2019_715_MOESM2_ESM.pdf [file 395_2019_715_MOESM2_ESM.pdf]

**Online Table 2.** Cell Surface Markers Across the MI Time Course (Top 25 ranked by fold-change and p value)

| <b>No change across MI</b> | <b>Selective for MI Day 1</b> | <b>Selective for MI Day 3</b> | <b>Selective for MI Day 7</b> |
|----------------------------|-------------------------------|-------------------------------|-------------------------------|
| <i>App</i>                 | <i>Abcc1</i>                  | <i>Clca1</i>                  | <i>Acvr1</i>                  |
| <i>Axl</i>                 | <i>Abcc4</i>                  | <i>Clca2</i>                  | <i>Acvr2a</i>                 |
| <i>Bcap31</i>              | <i>Adrb2</i>                  | <i>Epha4</i>                  | <i>Cd200</i>                  |
| <i>Bsg</i>                 | <i>Ager</i>                   | <i>Ephb4</i>                  | <i>Cd44</i>                   |
| <i>Bst2</i>                | <i>B3gnt3</i>                 | <i>Erb2</i>                   | <i>Dlg3</i>                   |
| <i>Caprin1</i>             | <i>Cav2</i>                   | <i>Fzd5</i>                   | <i>Efnb1</i>                  |
| <i>Cav1</i>                | <i>Cd40</i>                   | <i>Gp1bb</i>                  | <i>Ephb2</i>                  |
| <i>Cd151</i>               | <i>Eng</i>                    | <i>Ldlr</i>                   | <i>Ereg</i>                   |
| <i>Cd63</i>                | <i>Gpr137b</i>                | <i>Mfsd2a</i>                 | <i>Fgfr2</i>                  |
| <i>Clec2d</i>              | <i>Gpr35</i>                  | <i>Notch2</i>                 | <i>Frt2</i>                   |
| <i>Degs1</i>               | <i>Hvcn1</i>                  | <i>Pcdh1</i>                  | <i>Flt1</i>                   |
| <i>Fads2</i>               | <i>Lrrc32</i>                 | <i>Pcdh18</i>                 | <i>Gpc1</i>                   |
| <i>Ghr</i>                 | <i>Lrrc8d</i>                 | <i>Pcdh19</i>                 | <i>Gpc3</i>                   |
| <i>Il6st</i>               | <i>Mmd</i>                    | <i>Pcdhgc3</i>                | <i>Gpr39</i>                  |
| <i>Lamp1</i>               | <i>Mrgpre</i>                 | <i>Pkd1</i>                   | <i>Itgb3</i>                  |
| <i>Maea</i>                | <i>Nagpa</i>                  | <i>Ptprb</i>                  | <i>Kcnj15</i>                 |
| <i>Osmr</i>                | <i>Procr</i>                  | <i>Sigmar1</i>                | <i>Olr1</i>                   |
| <i>Pdgfrb</i>              | <i>Psen2</i>                  | <i>Slc1a4</i>                 | <i>Pcdh7</i>                  |
| <i>Pdpn</i>                | <i>Relt</i>                   | <i>Slc26a6</i>                | <i>Plscr1</i>                 |
| <i>Pgrmc1</i>              | <i>Rtn4r</i>                  | <i>Slc39a14</i>               | <i>Ptprd</i>                  |
| <i>Sdcbp</i>               | <i>Slc6a6</i>                 | <i>Tbxa2r</i>                 | <i>Ror1</i>                   |
| <i>Slc25a3</i>             | <i>Slc7a11</i>                | <i>Tm7sf2</i>                 | <i>Slc16a4</i>                |
| <i>Slc25a4</i>             | <i>Stom</i>                   | <i>Tmem150a</i>               | <i>St3gal5</i>                |
| <i>Slc25a5</i>             | <i>Tfrc</i>                   | <i>Trabd2b</i>                | <i>Stbd1</i>                  |
| <i>Tspan4</i>              | <i>Tnfrsf21</i>               | <i>Zyx</i>                    | <i>Traf5</i>                  |
