# Supplementary material for: Fibroblast polarization over the myocardial infarction time continuum shifts roles from inflammation to angiogenesis
Source: PubMed Central journal article supplement (PMC6329742; doi:10.1007/s00395-019-0715-4), 2019-01-11
Supplement: 395_2019_715_MOESM3_ESM.pdf [file 395_2019_715_MOESM3_ESM.pdf]

| Online Table 3. Top 500 Genes Ranked by Average FPKM. |               |          |          |          |         |           |               |          |               |
|-------------------------------------------------------|---------------|----------|----------|----------|---------|-----------|---------------|----------|---------------|
| 1-50                                                  | 51-100        | 101-150  | 151-200  | 201-250  | 251-300 | 301-350   | 351-400       | 401-450  | 451-500       |
| Mir2137                                               | Rps24         | Col4a1   | Ubc      | Lhfp     | Csde1   | C3        | Mfge8         | Prkar1a  | Nfe2l1        |
| Rmrp                                                  | Actg1         | Rps27a   | Atf5b    | Anxa5    | Snord89 | Atox1     | Hspd1         | Eif3a    | Gnb1          |
| Snord49b                                              | Snora74a      | Rps14    | Igfbp2   | Cox6c    | Ppib    | Capns1    | Ndubf4        | Lbh      | Csnk1a1       |
| Rpph1                                                 | Snord34       | Rps7     | Ccng1    | Tuba1c   | Ndufa3  | Prelid1   | Psmd8         | Tmem66   | Ccnd1         |
| Fil1                                                  | Rpl17         | Rpl8     | Esd      | Ptma     | Uqcrb   | Ddx5      | Ccnd2         | Atp6ap1  | Ndufa6        |
| Eef1a1                                                | Snord15b      | Rpl36    | Rpl5     | Rpl36al  | Myeov2  | Edf1      | Krtcap2       | Comm3    | Vaultc5       |
| Snord49a                                              | Rpl13a        | Snord33  | Gpx4     | Dstn     | Crip1   | Slc25a3   | Bag1          | Cct6a    | Igfbp4        |
| Malat1                                                | Rps15         | Rpl27a   | Ifitm2   | Cyb5f3   | Atp5e   | Mif       | Nupr1         | Gpx1     | Atp6v1e1      |
| Sparc                                                 | Rpl7          | Rpl6     | S100a10  | Snord55  | Atpif1  | Gdi2      | Psmb3         | Copa     | Pabpc1        |
| Snord83b                                              | Ctgf          | Gnas     | Tceb2    | Fbn1     | Col1a1  | Mrfap1    | Atp5o         | Myo1c    | Cct8          |
| S100a4                                                | Rps17         | Hspa5    | Cox4i1   | Shfm1    | Pgam1   | Mrps21    | Copb2         | Rcn1     | Gars          |
| Snord104                                              | Calr          | Rps6     | Rnu12    | Rpl15    | Lox12   | Sptan1    | Chchd2        | Psma7    | Psmc3         |
| S100a6                                                | Rps8          | Col8a1   | S100a11  | Rps27l   | Tbca    | Cap1      | Sumo2         | Eif3h    | Hnrnpf        |
| Col3a1                                                | Hsp90b1       | Fau      | Itgb5    | Snord16a | P4ha1   | Tpm3      | 2010107E04Rik | Lman1    | Ctnna1        |
| Rps12                                                 | Rpl9          | Ccdc80   | Rps3     | Vcp      | Mgp     | Arf1      | Serpib9b      | Degs1    | Tcp1          |
| Rplp1                                                 | Rps4x         | Acta2    | Rpl31    | Timp2    | Myl12b  | Cox7c     | Nars          | Mnf1     | Cct4          |
| Rpl41                                                 | Rps26         | Tmsb10   | Ephx1    | Anxa3    | Uqcr11  | Clic4     | Clic1         | Mfap5    | Psma3         |
| Snord32a                                              | Rps28         | Lamp1    | Canx     | Ctsz     | Cstb    | Nedd8     | Dad1          | Eif4g1   | Eif3c         |
| Snord110                                              | Rpl37a        | Rpl36a   | Rpl27    | Uqcrh    | Atp6v0c | Bcap31    | Psmb1         | Gsto1    | Ran           |
| Hspa8                                                 | Prdx1         | Ahnak    | Rpl21    | Ddb1     | Wls     | Ctnnb1    | Scd2          | Ywhae    | Spp1          |
| Rpl23a                                                | Rps21         | Rpl18    | Cox6b1   | Pmp      | Arl1    | Cct5      | 42615         | Heg1     | Atp5f1        |
| Igfbp7                                                | Eef2          | Rpl3     | Sod1     | Gapdh    | Hint1   | Capn2     | Calm1         | Snora28  | Hist1h1c      |
| Snord22                                               | Rnu73b        | Snord100 | Serpib6a | Btf3     | Id3     | Atp6v0e   | Serinc1       | Tcf21    | Rpl22         |
| Vim                                                   | Rps10         | Snord99  | Slc25a4  | Atp5l    | Tmem59  | Rhoc      | Tubb4b        | Tcf25    | Anxa6         |
| Anxa1                                                 | Rpl11         | Cald1    | Calm2    | Pdia6    | Txndc5  | Rnase4    | Tubb2a        | Vdac1    | Sh3bgrl       |
| Scarna2                                               | Rpl4          | Cst3     | Mt1      | Ldha     | Usmg5   | Mt2       | Tbx20         | Aldh2    | Ndufa2        |
| Gm15772                                               | Rps11         | Sqstm1   | Ost4     | Ndufa4   | Dynlrb1 | Serpina3n | H3f3a         | Ostc     | 2410006H16Rik |
| Rn4.5s                                                | Rpl28         | Rpl14    | Hmox1    | Swi5     | Actn1   | Ifi271l   | Prdx4         | Adipor1  | Gabarapl1     |
| Rpl35                                                 | Rps19         | Hspb1    | Postn    | Prss23   | Ybx1    | Tmem45a   | Ptfr          | Atp5c1   | Cav1          |
| Rpl39                                                 | Rps9          | Pkm      | Snora78  | Atp5h    | Nap11l  | Serf2     | Slc44a2       | Gadd45g  | Rras2         |
| Rps20                                                 | 9930013L23Rik | Ankrd1   | Bsg      | Cd151    | Vdac2   | Cct2      | Atp5g2        | Sec61b   | Rexo2         |
| Gm9846                                                | Rpl34-ps1     | Snord17  | Sptbn1   | Fam129b  | Ndufa7  | Pebp1     | Psmb4         | Uqcr10   | Shisa5        |
| Serpine1                                              | Rpl13         | Rps23    | Myl12a   | Eef1b2   | Gpx8    | Rab7      | Phldb2        | Psmb7    | Tns3          |
| Uba52                                                 | Gm12191       | Calu     | Mcf2     | Asah1    | Cox7a2l | Ghr       | Sec61g        | Spcs1    | Cct3          |
| Rpl38                                                 | Tpm4          | Tagln    | Cryab    | Hnrnpk   | Eif5a   | 42620     | Srsf5         | Ddost    | Rcn2          |
| Rpl10                                                 | Rpsa          | Rps13    | Prdx5    | Pdpm     | Pdia4   | Cox5b     | Sec13         | Eif3e    | Nucb1         |
| Snord82                                               | Gnb2l1        | Rpl18a   | App      | Mgst1    | Srp14   | Psma2     | Atf4          | Rabac1   | Park7         |
| Rps2                                                  | Rps5          | Gas6     | Col4a2   | Gm10094  | Pgk1    | Crip2     | Mrpl33        | Pls3     | Ubxn1         |
| Rpl32                                                 | Anxa2         | Dcn      | Pdia3    | Cpe      | Lmna    | Atp5a1    | Ndfip1        | Fam114a1 | Hsbp1         |
| Rplp0                                                 | Rps16         | Scarna17 | Eif4a1   | Sfrp1    | Eno1    | Npc2      | 1810022K09Rik | Cox7a2   | Sulf1         |
| Fbln2                                                 | Hsp90ab1      | Ctsl     | Ccl2     | Il6st    | Tma7    | Itm2c     | Aplp2         | Copz2    | Kcne4         |
| Lgals1                                                | Rpl23         | Rplp2    | Ccl7     | Snord15a | Aes     | Fhl2      | Pomp          | Gm12669  | 42624         |
| Myl6                                                  | Rpl35a        | Snord35a | Prdx2    | 42628    | Gnai2   | Arcp2     | Wdr1          | Ywhaq    | Eif4b         |
| Ppia                                                  | Cd81          | Rpl10a   | Cox8a    | Atp5k    | Arcp3   | Psma4     | Csrp1         | Ctps     | Mdh2          |
| Rpl19                                                 | Rpl7a         | Npm1     | Naca     | AF357425 | Pfdn5   | Tmed3     | Ecm1          | F3       | Caprin1       |
| Rpl12                                                 | Nme2          | Itgb1    | Serpinf1 | Cd63     | Cita    | Ssr4      | Hdlbp         | Scarb2   | Ppp1ca        |
| Snora7a                                               | Col1a2        | Lyz2     | Cox6a1   | Cdc42    | Rpl37   | Eif3k     | Scel          | Psmc6    | Ap2m1         |
| Rps18                                                 | Rps25         | Scarna10 | Gsn      | Atp5j2   | Calm3   | Axl       | Ctsb          | Psmd2    | Vcl           |
| Rps3a1                                                | Rpl24         | Rpl29    | Col6a1   | Pea15a   | Tmem258 | Map1lc3b  | Atp6v1f       | Snora44  | Tmem50a       |
| Rps29                                                 | Snord12       | Cfl1     | Gabarap  | Serping1 | Oaz1    | Dpysl2    | Hspa9         | Gpi1     | Atp5g3        |
