# Supplementary material for: Fibroblast polarization over the myocardial infarction time continuum shifts roles from inflammation to angiogenesis
Source: PubMed Central journal article supplement (PMC6329742; doi:10.1007/s00395-019-0715-4), 2019-01-11
Supplement: 395_2019_715_MOESM4_ESM.pdf [file 395_2019_715_MOESM4_ESM.pdf]

**Online Table 6.** Top 10 upregulated and downregulated GO Biological Processes for each MI day ranked by combined score.

| Day 1                                                |       |          | Day 3                                                                                        |       |          | Day 7                                               |       |          |
|------------------------------------------------------|-------|----------|----------------------------------------------------------------------------------------------|-------|----------|-----------------------------------------------------|-------|----------|
| Pathway                                              | Score | p value  | Pathway                                                                                      | Score | p value  | Pathway                                             | Score | p value  |
| <b>Upregulated</b>                                   |       |          |                                                                                              |       |          |                                                     |       |          |
| Regulation of T-helper 17 cell lineage commitment    | 17.14 | 0.007    | Regulation of alcohol biosynthetic process                                                   | 73.18 | 7.00E-18 | Regulation of monocyte chemotaxis                   | 25.26 | 7.00E-06 |
| Gland morphogenesis                                  | 16.04 | 0.007    | Regulation of steroid biosynthetic process                                                   | 61.69 | 3.00E-14 | Ear morphogenesis                                   | 23.71 | 1.00E-05 |
| Positive regulation of janus kinase activity         | 15.64 | 0.007    | Cholesterol biosynthetic process                                                             | 61.23 | 4.00E-16 | Positive regulation of bone mineralization          | 21.69 | 6.00E-06 |
| Positive regulation of memory T cell differentiation | 15.5  | 0.007    | Sterol biosynthetic process                                                                  | 57.46 | 5.00E-15 | Regulation of endothelial cell chemotaxis           | 19.05 | 0.001    |
| Chondroitin sulfate metabolic process                | 15.3  | 0.0003   | Isoprenoid biosynthetic process                                                              | 33.45 | 2.00E-06 | Negative regulation of mononuclear cell migration   | 18.98 | 0.001    |
| Negative regulation of interleukin-10 production     | 15.04 | 0.002    | Cell migration involved in sprouting angiogenesis                                            | 23.73 | 4.00E-05 | Positive regulation of collagen metabolic process   | 18.87 | 0.0001   |
| Positive regulation of metanephros development       | 14.77 | 0.01     | Blood vessel endothelial cell migration                                                      | 21.86 | 9.00E-06 | Bleb assembly                                       | 18.74 | 0.002    |
| Positive regulation of macrophage chemotaxis         | 14.76 | 0.01     | Bleb assembly                                                                                | 20.47 | 0.001    | Phospholipid scrambling                             | 17.65 | 0.003    |
| Negative regulation of cholesterol storage           | 14.59 | 0.007    | Cellular response to laminar fluid shear stress                                              | 20.05 | 0.0003   | Positive regulation of wound healing                | 17.38 | 0.0002   |
| Amino acid transmembrane transport                   | 14.49 | 0.003    | Extracellular matrix organization                                                            | 19.48 | 7.00E-06 | Protein localization to basolateral plasma membrane | 17.35 | 0.002    |
| <b>Downregulated</b>                                 |       |          |                                                                                              |       |          |                                                     |       |          |
| Secondary alcohol biosynthetic process               | 60.37 | 1.60E-13 | NADH metabolic process                                                                       | 23.26 | 0.003    | glutathione derivative metabolic process            | 28.95 | 3.00E-06 |
| Cholesterol biosynthetic process                     | 57.47 | 3.70E-15 | Glutathione derivative metabolic process                                                     | 16.95 | 0.0006   | glutathione derivative biosynthetic process         | 21.8  | 3.00E-06 |
| Sterol biosynthetic process                          | 52.41 | 3.70E-14 | Regulation of epithelial to mesenchymal transition involved in endocardial cushion formation | 16.88 | 0.003    | Xenobiotic catabolic process                        | 20.49 | 8.00E-06 |

|                                                                   |       |          |                                                                                    |       |        |                                                                                              |       |        |
|-------------------------------------------------------------------|-------|----------|------------------------------------------------------------------------------------|-------|--------|----------------------------------------------------------------------------------------------|-------|--------|
| Regulation of steroid biosynthetic process                        | 46.63 | 6.00E-11 | Regulation of MyD88-independent toll-like receptor signaling                       | 15.91 | 0.008  | regulation of epithelial to mesenchymal transition involved in endocardial cushion formation | 17.76 | 0.003  |
| Acetyl CoA metabolic process                                      | 27.78 | 0.00002  | Regulation of transcription from RNA pol II promoter involved in heart development | 14.85 | 0.005  | Positive regulation of apoptotic cell clearance                                              | 15.46 | 0.004  |
| Choline catabolic process                                         | 20.99 | 0.0005   | Ventricular trabecula myocardium morphogenesis                                     | 14.31 | 0.008  | Response to iron ion                                                                         | 14.88 | 0.002  |
| Positive regulation of osteoblast proliferation                   | 20.91 | 0.0005   | Xenobiotic catabolic process                                                       | 14    | 0.0003 | Positive regulation of interleukin-2 biosynthetic process                                    | 14.12 | 0.006  |
| Cellular biogenic amine catabolic process                         | 19.05 | 0.001    | Membrane lipid metabolic process                                                   | 13.99 | 0.002  | Endocardial cushion development                                                              | 14.03 | 0.001  |
| Outflow tract septum morphogenesis                                | 18.97 | 0.0002   | Positive regulation of interleukin-2 biosynthetic process                          | 13.33 | 0.0006 | Glutathione metabolic process                                                                | 12.82 | 0.0003 |
| Regulation of Wnt signaling pathway, planar cell polarity pathway | 18.69 | 0.0008   | Glutathione derivative biosynthetic process                                        | 12.77 | 0.0006 | Drug transmembrane transport                                                                 | 12.65 | 0.01   |
