# Supplementary material for: Fibroblast polarization over the myocardial infarction time continuum shifts roles from inflammation to angiogenesis
Source: PubMed Central journal article supplement (PMC6329742; doi:10.1007/s00395-019-0715-4), 2019-01-11
Supplement: 395_2019_715_MOESM5_ESM.pdf [file 395_2019_715_MOESM5_ESM.pdf]

**Fibroblast polarization over the myocardial infarction time continuum  
shifts roles from inflammation to angiogenesis**

*Basic Research in Cardiology*

Alan J. Mouton<sup>1</sup>, Yonggang Ma<sup>1</sup>, Osvaldo J. Rivera Gonzalez<sup>1</sup>, Michael J. Daseke II<sup>1</sup>,  
Elizabeth R. Flynn<sup>1</sup>, Tom C. Freeman,<sup>2</sup> Michael R. Garrett<sup>3</sup>, Kristine Y. DeLeon-Pennell<sup>1,4</sup>, and  
\*Merry L. Lindsey<sup>1,4</sup>

<sup>1</sup>Mississippi Center for Heart Research, Department of Physiology and Biophysics, University of  
Mississippi Medical Center, Jackson, MS, 39216, USA.

<sup>2</sup>The Roslin Institute, University of Edinburgh, Easter Bush, Midlothian EH25 9RG, UK.

<sup>3</sup>Department of Pharmacology and Toxicology, University of Mississippi Medical Center, Jackson, MS,  
39216, USA.

<sup>4</sup>Research Service, G.V. (Sonny) Montgomery Veterans Affairs Medical Center, Jackson, MS, 39216,  
USA.

**\*Address for Correspondence:**

Merry L. Lindsey, Ph.D.

Department of Physiology and Biophysics

University of Mississippi Medical Center

2500 North State St., Jackson, MS 39216-4505, USA

(phone) +1601-815-1329      (fax) +1601-984-1817

email: [mlindsey@umc.edu](mailto:mlindsey@umc.edu)

## Supplemental Material

**Online Resource 1. Proof of Successful MI.** (a) Day 7 survival rate was 52% (13/25). (b) Infarct size did not differ between days 1, 3, and 7. (c) LV wall thinning occurred to a similar degree at all MI times. (d) End-diastolic dimension was increased at MI day 7, while (e) end-systolic dimension was increased at day 1 and 3 and further increased at day 7. (f) Fractional shortening decreased similarly across all MI days. n=3 per group. \*p<0.05 versus day 0, #p<0.05 versus MI day 1, \$p<0.05 versus MI day 3

**Online Resource 2. Proof of Cell Purity and Pro-fibrotic Protein Secretion after MI.** (a) FPKM values for cell markers for cardiac fibroblasts (*Acta2*, *Col1a1*, *Col3a1*, *Postn*, and *Tcf21*), endothelial cells, lymphocytes, macrophages, myocytes, and neutrophils. (Bottom) Cardiac fibroblast markers graphed as fold change over day 0. (b) Secretion of collagen-related peptides by mass spectrometry. (c) *Postn* expression in the myocardium at different MI time points. \*p<0.05 versus day 0, #p<0.05 versus MI day 1

**Online Resource 3. RT-PCR Validation of RNA-Seq.** For *Acta2*, *Col3a1*, *Cx3cl1*, *Mmp14*, and *Postn*, FPKM values are graphed in the left column,  $2^{-\Delta Ct}$  values are graphed in the middle, and correlations between FPKM and  $2^{-\Delta Ct}$  values are displayed on the right. n=3 per group. \*p<0.05 versus day 0, #p<0.05 versus MI day 1.

**Online Resource 4. (a) Pro-fibrotic Markers, (b) Cell Death/Apoptosis Markers, (c) Markers of Origin, and (D) MMPs.** n=3 per group. \*p<0.05 versus day 0, #p<0.05 versus MI day 1, \$p<0.05 versus MI day 3.

**Online Resource 5. MI Angiogenic Gene Expression.** (a) Pro-angiogenic genes upregulated after MI. (b) Anti-angiogenic genes upregulated after MI. (c) Pro-angiogenic genes downregulated after MI. n=3 per group. \*p<0.05 versus day 0, #p<0.05 versus MI day 1, \$p<0.05 versus MI day 3.

**Online Resource 6. Expression of CCL5, CX3CL1, and VEGF in MI Cardiac Fibroblasts.** CCL5 (a) and CX3CL1 (b) in the day 1 infarct region and expression of VEGF (c) in the day 3 infarct region did not localize to the infarct fibroblast. Expression of these proteins within fibroblasts (co-localization with PDGFR $\alpha$ + cells) were not significantly different from day 0.

Online Resource 1

(a) Day 7 survival

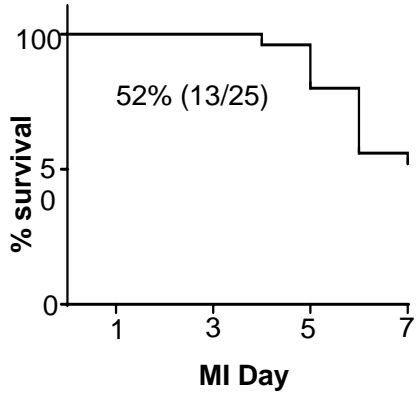

(b) Infarct size (Weight)

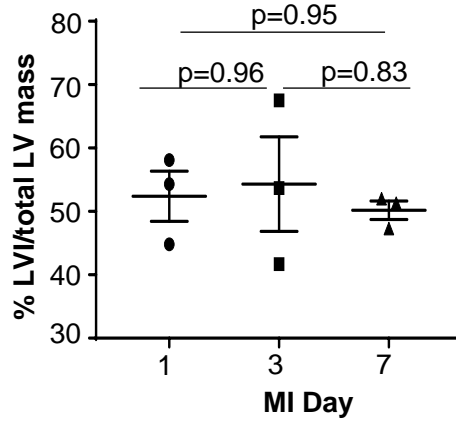

(c) LV wall thickness

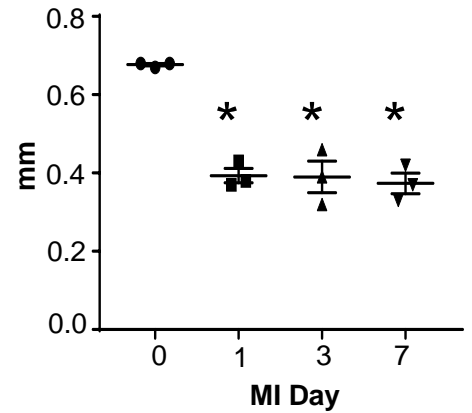

(d) End-diastolic dimensions

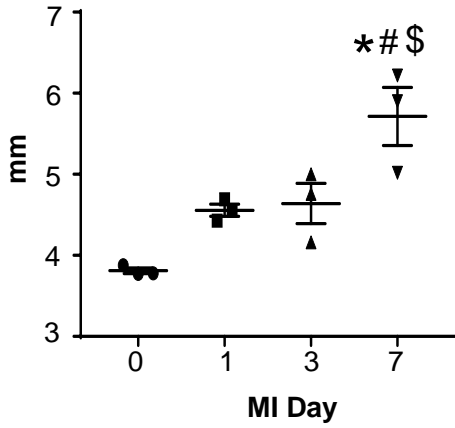

(e) End-systolic dimensions

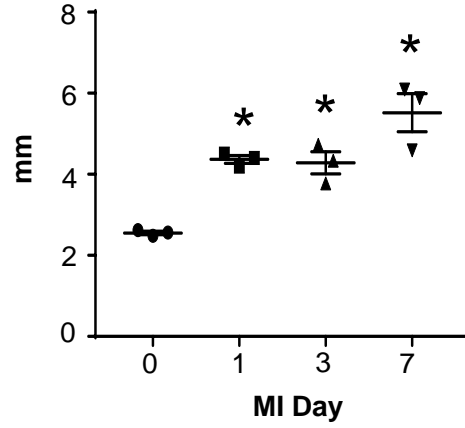

(f) Fractional Shortening

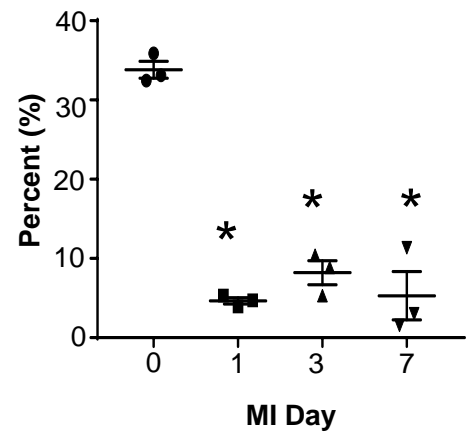

## Online Resource 2

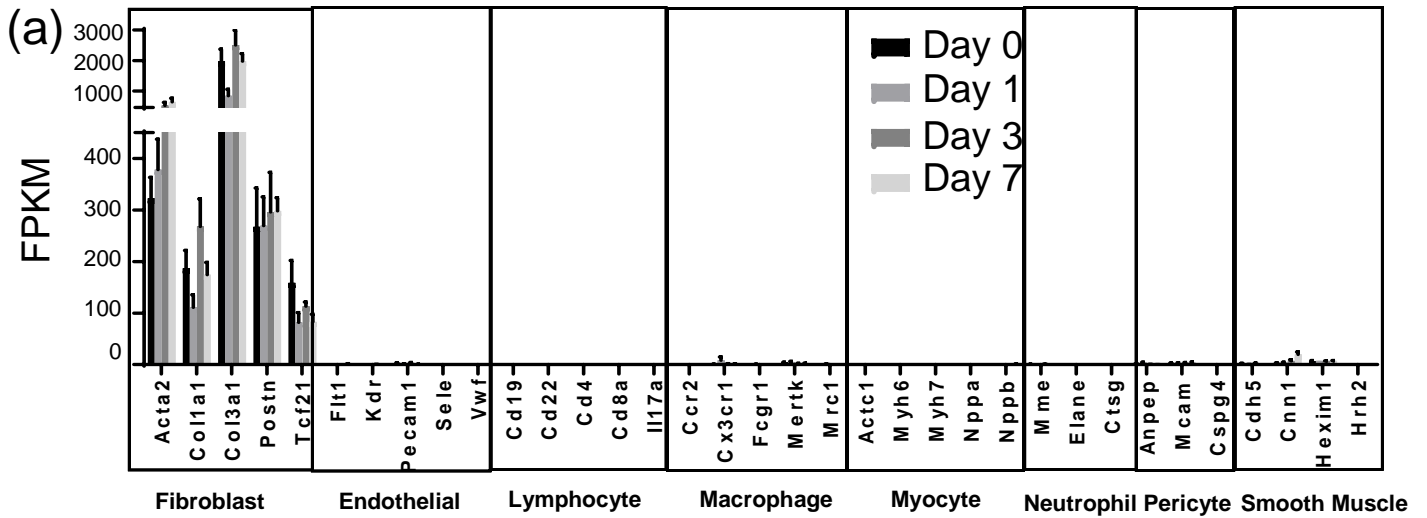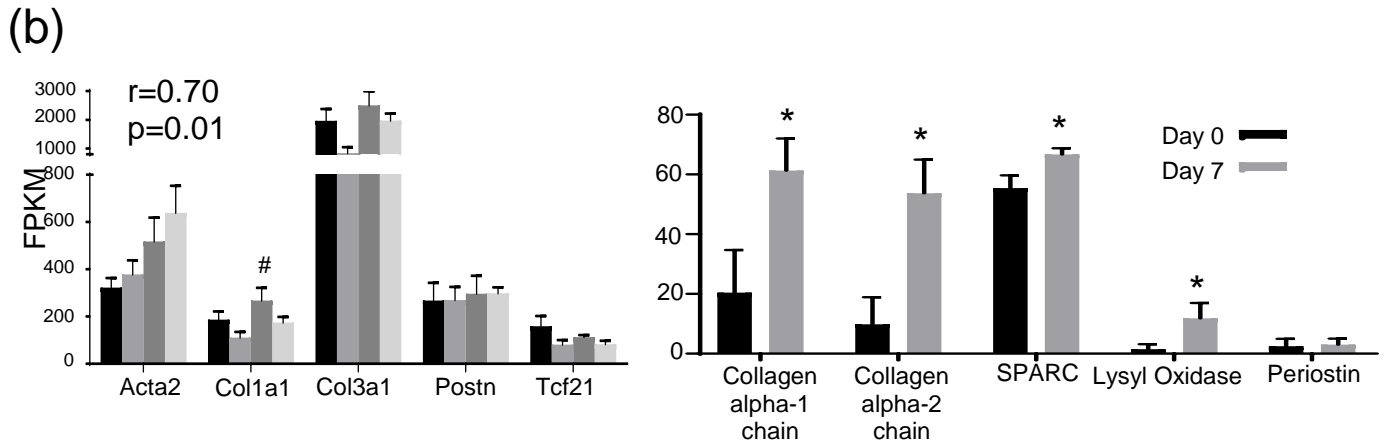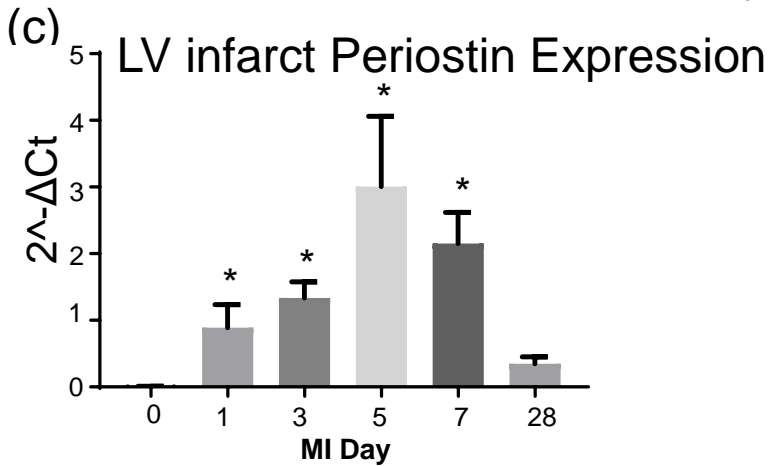

Online Resource 3

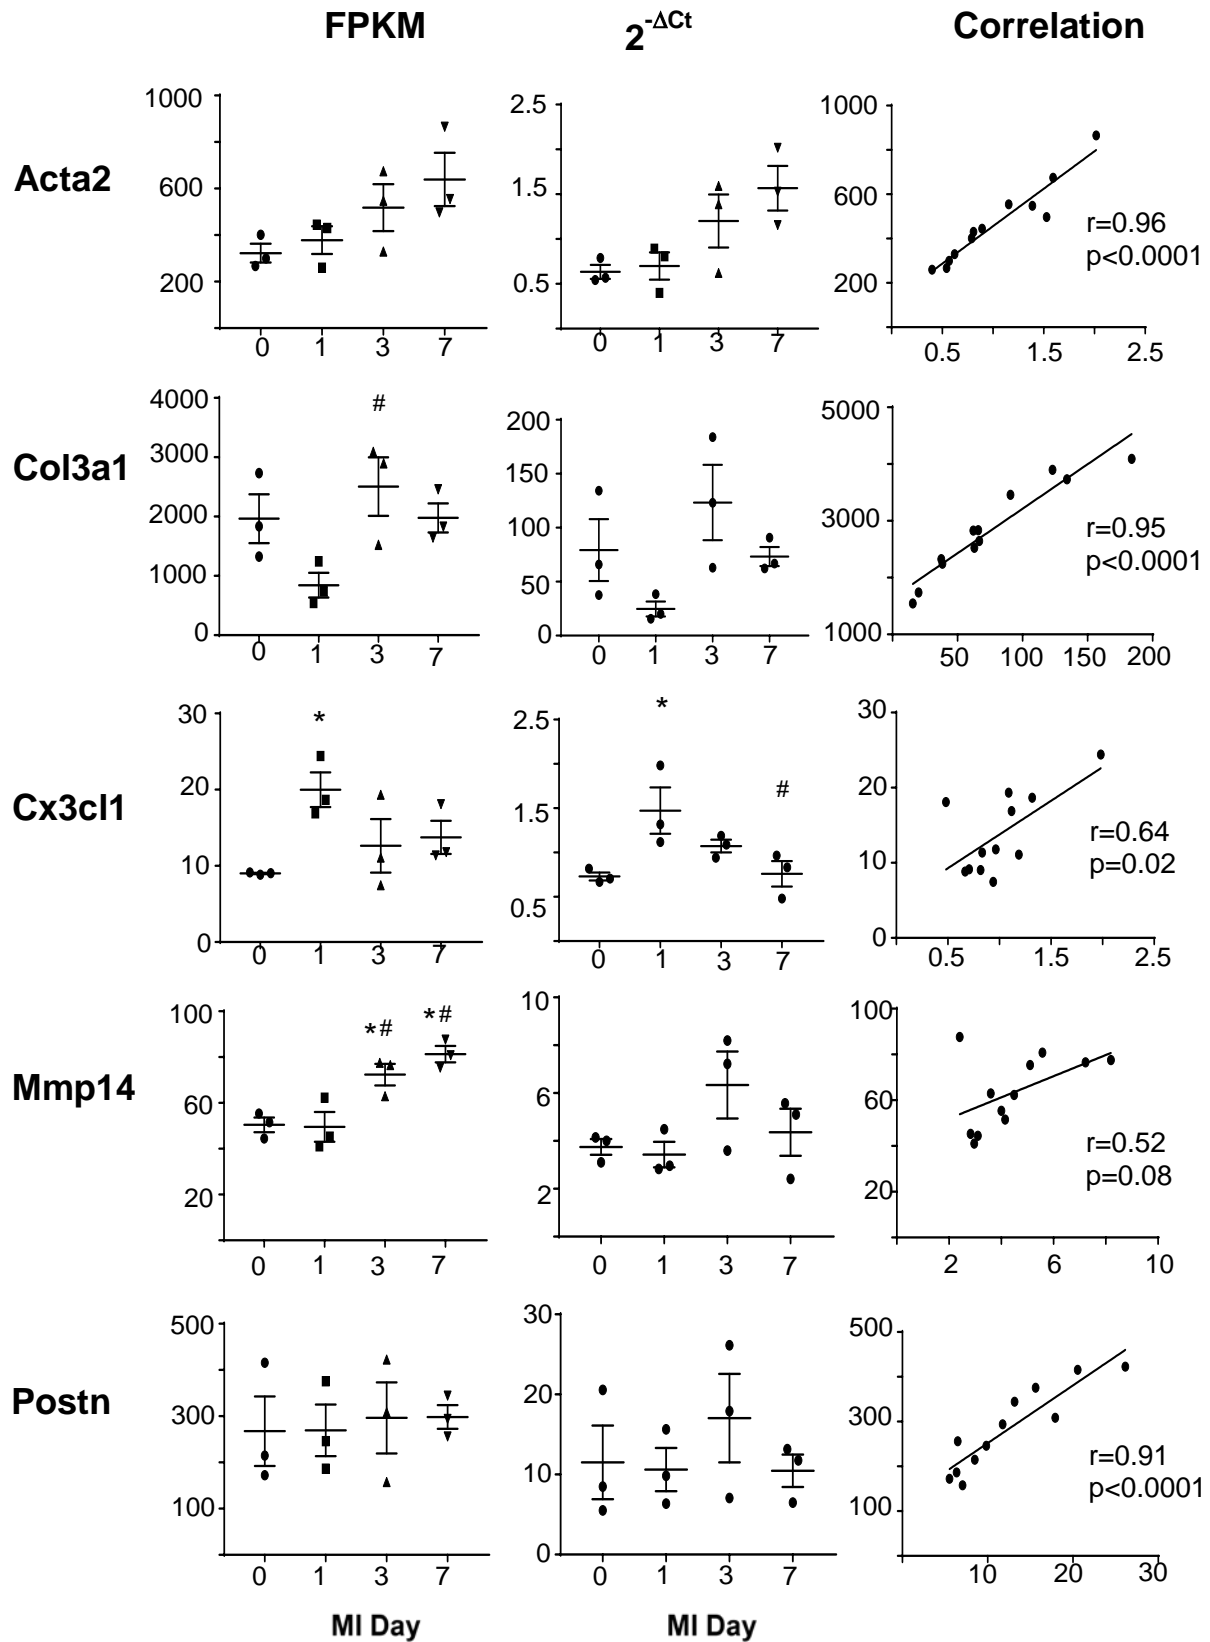

Online Resource 4

(a) Pro-fibrotic markers

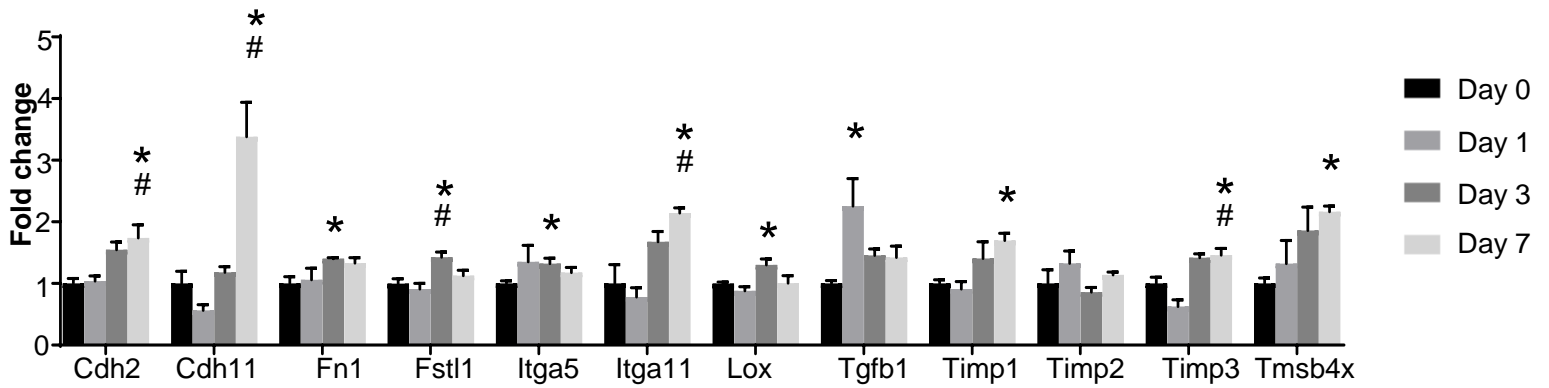

(b) Cell death/apoptosis markers

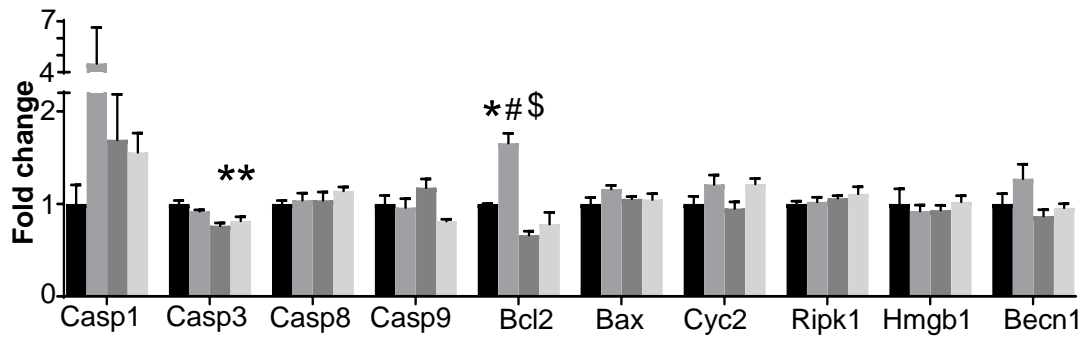

(c) Markers of origin

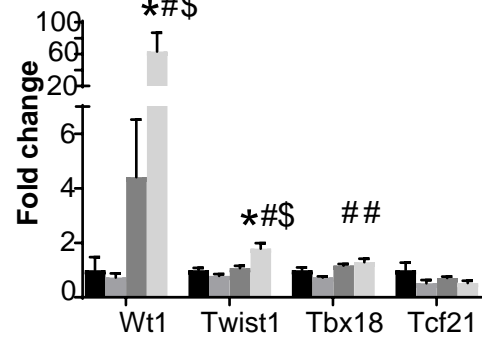

(d) MMPs

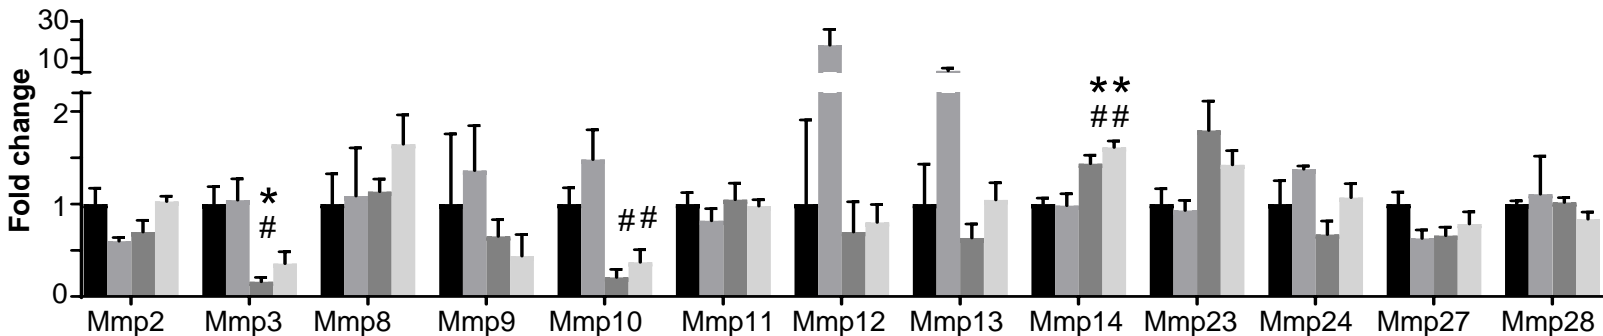

Online Resource 5

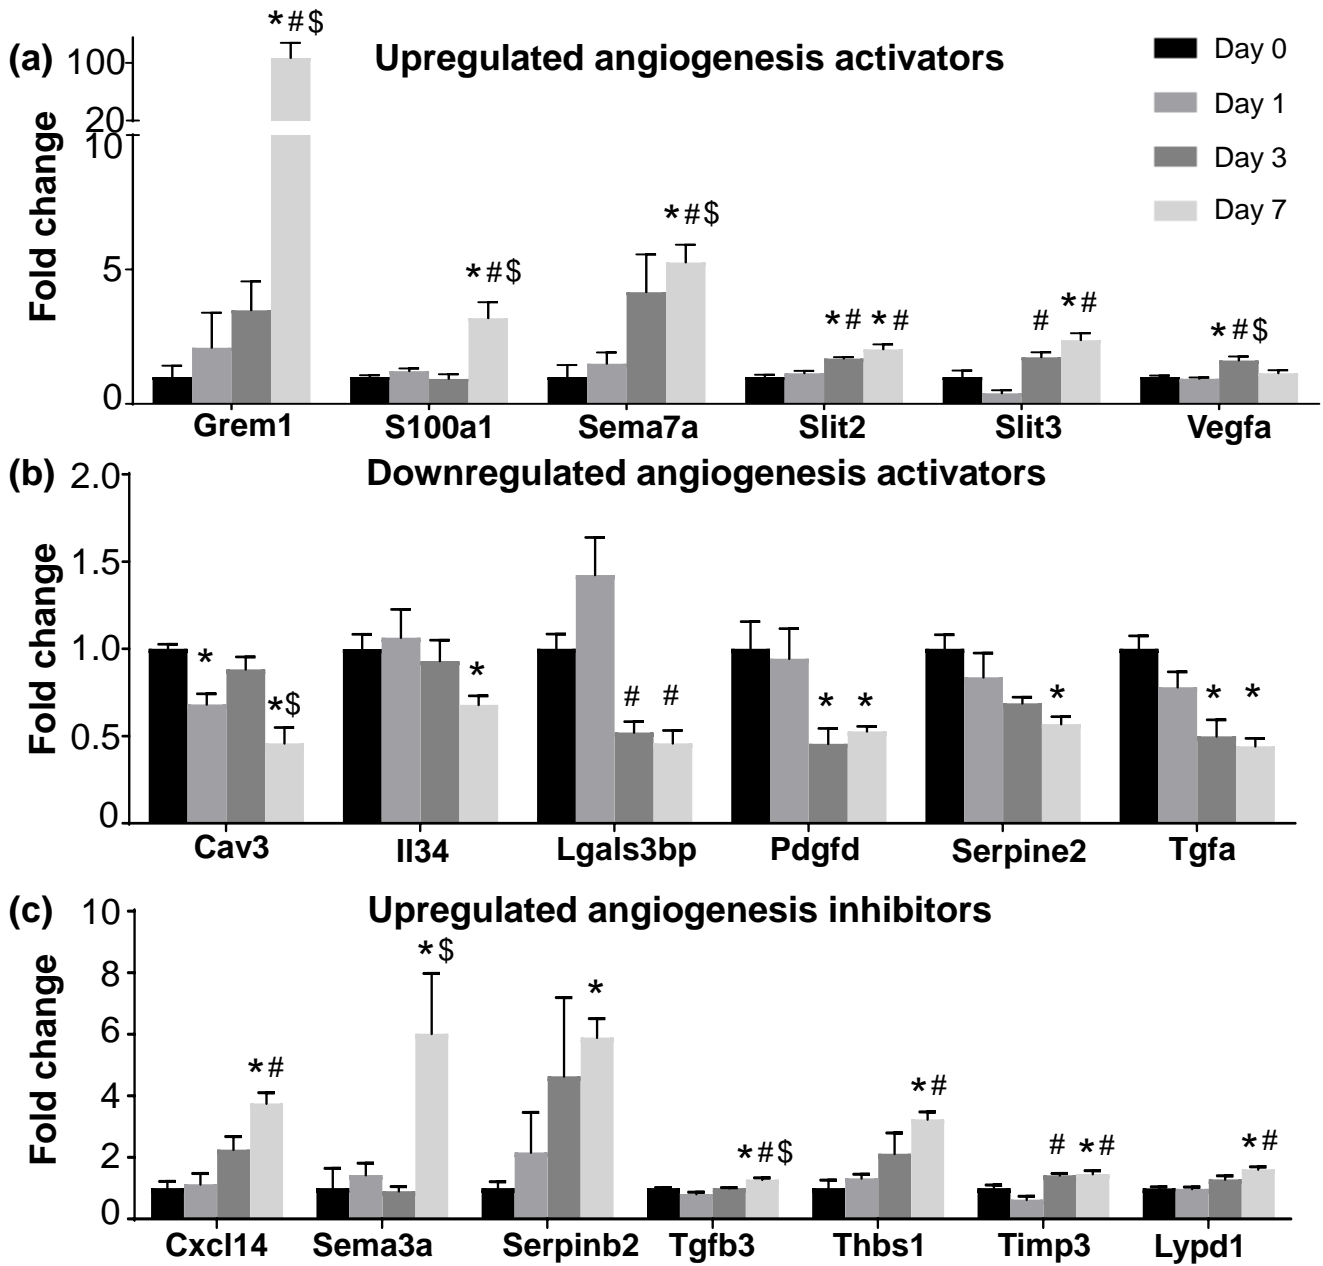

## Online Resource 6

(a) CX3CL1 Total Area

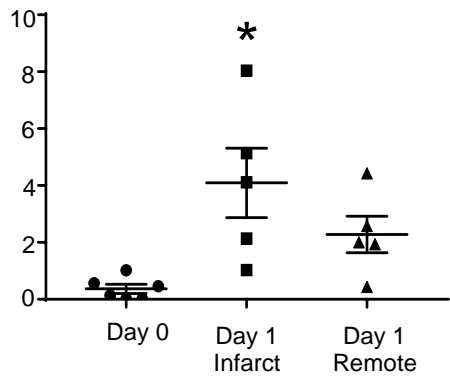

(b) CCL5 Total Area

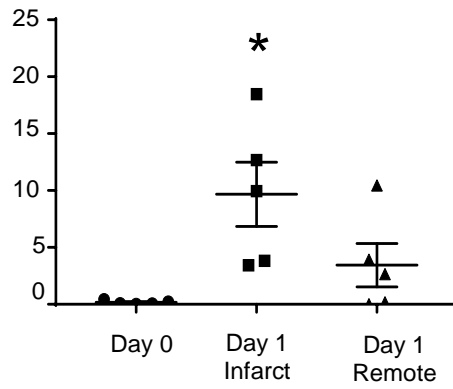

(c) VEGF Total Area

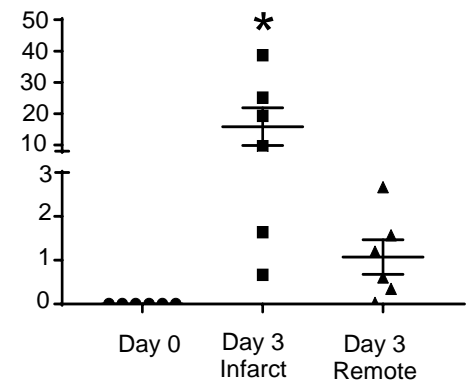

CX3CL1 Co-Localization

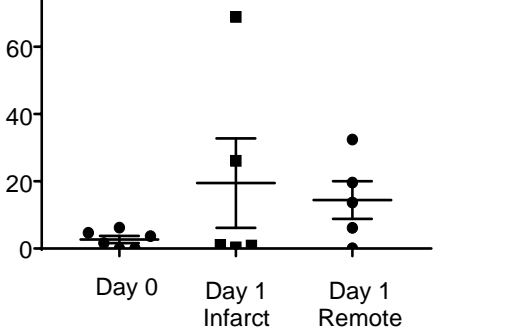

CCL5 Co-Localization

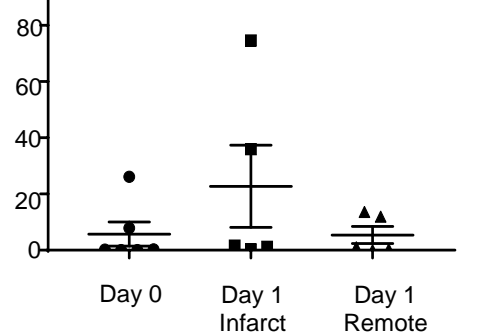

VEGF Co-Localization

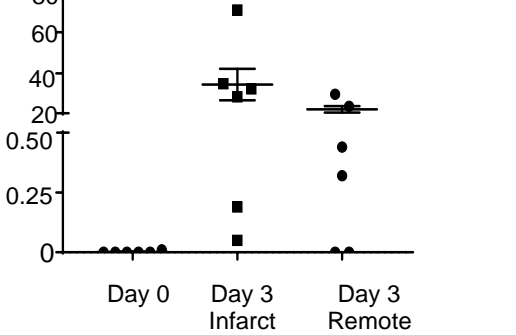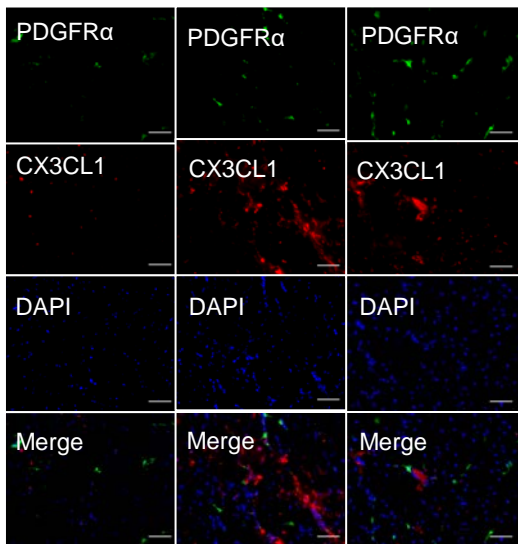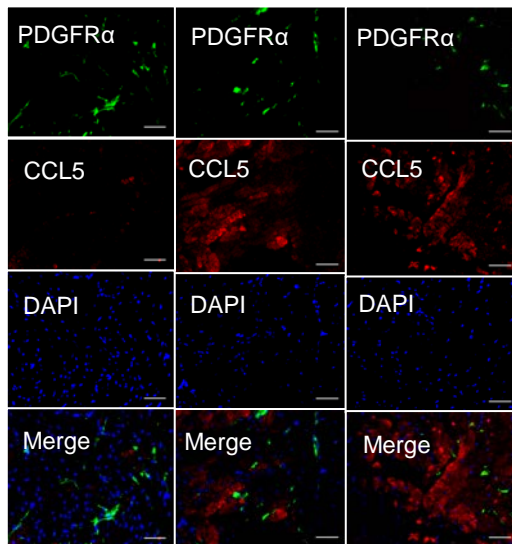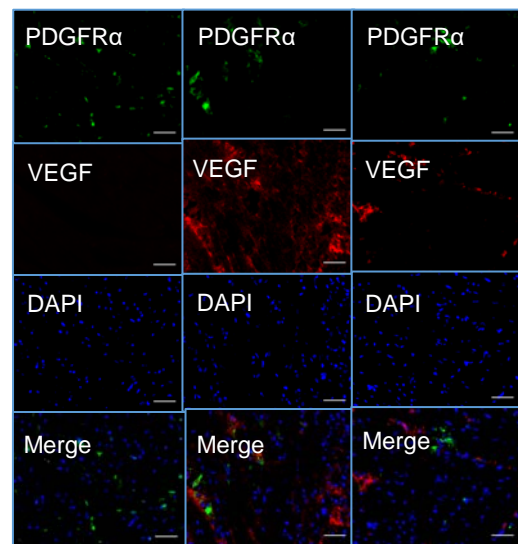



Online Tables 1, 2 and 3 are longer than one page and are included separately.

| <b>Online Table 4.</b> Significantly enriched pathways in the day 0 phenotype and pan fibroblast marker phenotype. |                |                       |
|--------------------------------------------------------------------------------------------------------------------|----------------|-----------------------|
|                                                                                                                    | <b>p value</b> | <b>Combined Score</b> |
| <b>Enriched pathways (Day 0 phenotype)</b>                                                                         |                |                       |
| 5-hydroxytryptamine degradation                                                                                    | 0.010          | 3.51                  |
| Mannose metabolism                                                                                                 | 0.012          | 2.11                  |
| De novo pyrimidine ribonucleotides biosynthesis                                                                    | 0.018          | 1.37                  |
| <b>Cell types corresponding to pan fibroblast markers</b>                                                          |                |                       |
| Mouse embryonic fibroblasts                                                                                        | 0.005          | 8.92                  |
| Osteoblast day 14                                                                                                  | 0.005          | 8.37                  |
| Osteoblast day 21                                                                                                  | 0.045          | 4.32                  |
| <b>Pan cell surface markers</b>                                                                                    |                |                       |
| <i>Met, Npr3, Pdgfra</i>                                                                                           |                |                       |
| <b>Enriched pathways (pan fibroblast markers)</b>                                                                  |                |                       |
| Integrin signaling                                                                                                 | 1.34E-8        | 32.29                 |
| Parkinson disease                                                                                                  | 1.02E-7        | 23.02                 |
| Cytoskeletal regulation by Rho                                                                                     | 6.0E-5         | 12.15                 |
| CCKR signaling map ST                                                                                              | 0.0009         | 9.28                  |
| Huntington disease                                                                                                 | 0.004          | 5.93                  |
| Inflammation mediated by chemokine and cytokine signaling                                                          | 0.008          | 5.45                  |
| Glycolysis                                                                                                         | 0.0007         | 2.55                  |

| <b>Online Table 5.</b> Significantly upregulated and downregulated pathways by Panther ranked by p value. Differentially expressed genes for each pathway are listed. |                                                                                                                         |                                                  |                                                                                                      |
|-----------------------------------------------------------------------------------------------------------------------------------------------------------------------|-------------------------------------------------------------------------------------------------------------------------|--------------------------------------------------|------------------------------------------------------------------------------------------------------|
| <b>Day 1</b>                                                                                                                                                          |                                                                                                                         |                                                  |                                                                                                      |
| <b>Upregulated</b>                                                                                                                                                    |                                                                                                                         | <b>Downregulated</b>                             |                                                                                                      |
| <b>pentose phosphate pathway</b>                                                                                                                                      | <i>Taldo1, Tkt, Pgd</i>                                                                                                 | <b>cholesterol biosynthesis</b>                  | <i>Fdft1, Fdps, Hmgcs1, Lss, Mvk, Mvd, Sqle</i>                                                      |
| <b>chemokine/cytokine-mediated inflammation</b>                                                                                                                       | <i>Arpc1b, Pak1, Ccl5, Cx3cl1, Cxcr6, Gng2, Gng5, Kras, Nfatc1</i>                                                      | <b>Transforming growth factor beta signaling</b> | <i>Bmp4, Bmp2, Nodal, Smad6, Smad7, Tgfb3</i>                                                        |
| <b>beta 2 adrenergic signaling</b>                                                                                                                                    | <i>Adrb2, Prkar2b, Stx3</i>                                                                                             | <b>mannose metabolism</b>                        | <i>Gmds, Pmm1</i>                                                                                    |
| <b>CRF receptor signaling pathway</b>                                                                                                                                 | <i>Gng2, Gng5, Stx3</i>                                                                                                 |                                                  |                                                                                                      |
| <b>semaphorin-mediated axon guidance</b>                                                                                                                              | <i>Pak1, Plxna1</i>                                                                                                     |                                                  |                                                                                                      |
| <b>Day 3</b>                                                                                                                                                          |                                                                                                                         |                                                  |                                                                                                      |
| <b>cholesterol biosynthesis</b>                                                                                                                                       | <i>Fdft1, Fdps, Hmgcr, Hmgcs1, Lss, Mvd, Mvk, Pmvk, Sqle</i>                                                            | <b>pyrimidine metabolism</b>                     | <i>Aldh6a1, Dpyd, Abat</i>                                                                           |
| <b>integrin signaling</b>                                                                                                                                             | <i>Actb, Actn4, Bcar1, Col11a1, Col16a1, Col27a1, Col2a1, Col5a1, Flna, Fn1, Itga5, Lama1, Pik3r3, Rhoa, Rhob, Vasp</i> | <b>5-hydroxytryptamine degradation</b>           | <i>Aldh3a1, Maoa</i>                                                                                 |
| <b>cytoskeletal regulation by Rho GTPase</b>                                                                                                                          | <i>Actb, Arhgap1, Myh9, Pak4, Pfn1, Ssh1, Tubb3, Vasp</i>                                                               |                                                  |                                                                                                      |
| <b>cadherin signaling</b>                                                                                                                                             | <i>Actb, Cdh2, Cdh10, Cdh24, Erbb2, Fzd5, Pcdh1, Pcdh18, Pcdh19, Pcdhga10, Pcdhgc3</i>                                  |                                                  |                                                                                                      |
| <b>angiogenesis</b>                                                                                                                                                   | <i>Arhgap1, Fzd5, Kdr, Notch2, Pik3r3, Ptprb, Rhoa, Rhob, Vegfa</i>                                                     |                                                  |                                                                                                      |
| <b>Day 7</b>                                                                                                                                                          |                                                                                                                         |                                                  |                                                                                                      |
| <b>cytoskeletal regulation by Rho GTPase</b>                                                                                                                          | <i>Actb, Actg2, Arhgap1, Arpc5, Enah, Myh9, Myh10, Myh11, Mylk, Stmn4</i>                                               | <b>Gi and Gs alpha G protein signaling</b>       | <i>Adcy2, Adcy9, Gng2, Grk1, Kcnj5, Prkar2b, Pygm, Rgs3, Rgs4, Rgs6, Rgs7</i>                        |
| <b>cadherin signaling</b>                                                                                                                                             | <i>Actb, Actg2, Cdh2, Cdh3, Cdh10, Cdh11, Cdh24, Ctnnd1, Fzd3, Pcdh7, Pcdhga10, Wnt2, Wnt4</i>                          | <b>integrin signaling</b>                        | <i>Arhgap26, Col13a1, Col4a3, Col4a4, Col5a2, Elmo1, Itga2, Itga2b, Lama2, Lamb2, Lamb3, Pik3c2b</i> |
| <b>chemokine and cytokine-mediated inflammation</b>                                                                                                                   | <i>Ccr1, Camk2d, Arpc5, Actb, Actg2, Gnai1, Mylk, Gng5, Cxcr3, Grk6, Gnb3, Myh9, Myh10, Myh11</i>                       | <b>endothelin signaling</b>                      | <i>Adcy2, Adcy9, Ece1, Ednrb, Itpr2, Prkar2b, Pik3c2b</i>                                            |
| <b>presenilin pathway</b>                                                                                                                                             | <i>Actb2, Actg2, Cd44, Cdh3, Fzd3, Mmp14, Mmp17, Wnt2, Wnt4</i>                                                         |                                                  |                                                                                                      |
| <b>angiogenesis</b>                                                                                                                                                   | <i>Arhgap1, Efnb1, Ephb2, F2r, Fzd3, Mapapk3, Pdgfc, Pik3r3, Pla2g4c, Prkd1, Wnt2, Thbs1</i>                            |                                                  |                                                                                                      |

Online Table 6 is larger than one page and is included separately.
